# Supplementary material
Source: PubMed Central journal article supplement (PMC6561160)
Supplement: pnas.1819889116.sd01.pdf [file pnas.1819889116.sd01.pdf]

| Genes               | logFC        | logCPM       | LR          | PValue      | FDR         | set.Name.p1. | MouseGeneSymbol | HumanGeneSymbol | Saline 1    | Saline 2    | Saline 3     | Saline 4    | Saline 5    | TMA-ARB 1   | TMA-ARB 2   | TMA-ARB 3   | TMA-ARB 4   | TMA-ARB 5   |
|---------------------|--------------|--------------|-------------|-------------|-------------|--------------|-----------------|-----------------|-------------|-------------|--------------|-------------|-------------|-------------|-------------|-------------|-------------|-------------|
| ENSMUSG00000063953  | 1.449290227  | 4.362171056  | 23.08842096 | 1.55E-06    | 0.022906243 | Amd2         | Amd2            | AMD1            | 14.17636678 | 9.130666839 | 10.97319592  | 7.84017804  | 15.10799173 | 29.17762677 | 24.59181152 | 20.10299365 | 39.83430813 | 26.73181648 |
| ENSMUSG00000069303  | -3.947364273 | 0.059349377  | 18.56679146 | 1.64E-05    | 0.121440752 | Hist1h2br    | Hist1h2br       |                 | 2.947561409 | 0.770770577 | 1.413724627  | 2.081463196 | 1.569661478 | 0.145524323 | 0           | 0.27632981  | 0.078568655 | 0           |
| ENSMUSG000000057003 | -6.926673275 | 0.571446398  | 17.76266743 | 2.50E-05    | 0.12349625  | Myh4         | Myh4            | MYH4            | 6.246022985 | 0.059290044 | 7.607184899  | 0           | 0.065402562 | 0.072762162 | 0           | 0           | 0           | 0           |
| ENSMUSG000000022893 | -0.960764359 | 5.749306403  | 16.52930738 | 4.79E-05    | 0.164059711 | Adamts1      | Adamts1         | ADAMTS1         | 66.46049176 | 112.4139242 | 57.22218729  | 73.89194347 | 57.68505933 | 44.96701582 | 32.94008438 | 42.20937841 | 24.82769501 | 32.87555915 |
| ENSMUSG000000026358 | -1.585580811 | 5.142017059  | 16.2535098  | 5.54E-05    | 0.164059711 | Rgs1         | Rgs1            | RGS1            | 103.4453694 | 56.14767205 | 60.45355787  | 21.78598146 | 34.85956533 | 14.40690798 | 17.92613629 | 32.95232979 | 6.756904338 | 13.26786979 |
| ENSMUSG000000067608 | 3.098502356  | 0.601694903  | 15.65294348 | 7.61E-05    | 0.16741609  | Pcna-ps2     | Pcna-ps2        | PCNA            | 0.350900168 | 0.355740266 | 0.403921322  | 0           | 0.39241537  | 4.147443207 | 1.876743511 | 3.246875263 | 2.671334273 | 0.326794823 |
| ENSMUSG000000017300 | -5.160019026 | 1.854518253  | 15.50242224 | 8.24E-05    | 0.16741609  | Tnnc2        | Tnnc2           | TNNC2           | 24.00157147 | 0.296450222 | 9.89607239   | 1.387642131 | 0           | 0           | 0.064715293 | 0.207247357 | 0           | 0.588230681 |
| ENSMUSG000000069302 | 6.836826478  | -0.812065182 | 15.13301767 | 0.000100196 | 0.16741609  | Hist1h2ah    | Hist1h2ah       |                 | 0           | 0           | 0            | 0           | 0           | 1.164194584 | 0           | 0.828989429 | 2.278490998 | 0           |
| ENSMUSG000000004655 | -1.430787856 | 5.593762114  | 15.07505904 | 0.000103319 | 0.16741609  | Aqp1         | Aqp1            | AQP1            | 50.81034428 | 147.2171803 | 51.36532812  | 71.74109817 | 43.03488553 | 56.1723887  | 32.42236203 | 15.19813953 | 13.98522061 | 15.42471562 |
| ENSMUSG000000037202 | -2.833711305 | 4.526641325  | 14.9047021  | 0.000113081 | 0.16741609  | Prf1         | Prf1            | PRF1            | 94.53250518 | 101.3266859 | 4.510454763  | 7.354503294 | 4.185763942 | 11.56918368 | 4.530070544 | 6.908245239 | 2.435628308 | 3.202589261 |
| ENSMUSG000000061816 | -6.101528531 | 1.272829485  | 14.38775138 | 0.000148767 | 0.200226652 | Myl1         | Myl1            | MYL1            | 15.29924731 | 0.118580089 | 8.213066882  | 0           | 0           | 0.072762162 | 0           | 0.207247357 | 0           | 0           |
| ENSMUSG000000089978 | 4.624871069  | -0.309284305 | 14.08393663 | 0.000174831 | 0.215697136 | Gm16245      | Crb1-ps         |                 | 0           | 0.177870133 | 0.06732022   | 0           | 0           | 0.436572969 | 0.129430587 | 0.552659619 | 3.355589479 | 1.372538255 |
| ENSMUSG000000089967 | -6.536432078 | -0.911253273 | 13.7407086  | 0.000209856 | 0.224680952 | Gm16550      | Gm16550         |                 | 2.17558104  | 0.889350666 | 1.009803305  | 0           | 0           | 0           | 0           | 0           | 0           | 0           |
| ENSMUSG000000020601 | -0.96031592  | 4.467262008  | 13.5894299  | 0.000227463 | 0.224680952 | Trib2        | Trib2           | TRIB2           | 27.22985301 | 37.29343793 | 26.18756571  | 30.7362732  | 29.23494503 | 21.7558863  | 12.68419752 | 17.13244819 | 7.306884924 | 15.22863873 |
| ENSMUSG000000005716 | -6.640104799 | -0.847896896 | 13.58796499 | 0.00022764  | 0.224680952 | Pvalb        | Pvalb           | PVALB           | 2.38612114  | 0           | 1.615685288  | 0.346910533 | 0           | 0           | 0           | 0           | 0           | 0           |
| ENSMUSG000000047264 | -0.93550016  | 4.707378517  | 13.38953807 | 0.000253032 | 0.234133394 | Zfp358       | Zfp358          | ZNF358          | 33.61623607 | 42.15522157 | 30.89998114  | 35.10734591 | 35.44818839 | 28.08619435 | 14.56094103 | 20.51748836 | 8.406846095 | 17.51620249 |
| ENSMUSG000000030399 | -3.939808306 | 1.913832731  | 12.82975011 | 0.000341151 | 0.297102659 | Ckm          | Ckm             | CKM             | 26.73859278 | 0.296450222 | 8.011106221  | 0.832585279 | 0.065402562 | 0.218286485 | 0.129430587 | 0.207247357 | 0.942823861 | 0.457512752 |
| ENSMUSG000000027381 | -0.877404255 | 4.945220861  | 12.58309288 | 0.000389252 | 0.320159795 | Bc12l11      | Bc12l11         | BCL2L11         | 38.38847835 | 48.85499659 | 39.65160978  | 39.96409337 | 39.30693952 | 29.03210245 | 14.49622574 | 29.29095982 | 12.41384751 | 21.11094554 |
| ENSMUSG000000022206 | -1.61006234  | 2.499924436  | 12.1071687  | 0.000502283 | 0.391384542 | Npr3         | Npr3            | NPR3            | 9.474034528 | 18.26133368 | 7.203263577  | 3.81601586  | 4.643581873 | 2.764962138 | 2.847472913 | 2.832380548 | 1.885647722 | 2.810435474 |
| ENSMUSG000000019102 | -1.281245339 | 3.958007513  | 11.95838925 | 0.000544019 | 0.402709915 | Aldh3a1      | Aldh3a1         | ALDH3A1         | 21.61545033 | 33.14313482 | 14.60848781  | 22.41042042 | 21.58284533 | 7.494502637 | 8.73656462  | 13.47107822 | 2.435628308 | 17.76461361 |
| ENSMUSG000000022820 | 1.396003167  | 4.423081239  | 11.70169061 | 0.000624433 | 0.440225536 | Ndufb4       | Ndufb4          | NDUFB4          | 6.877643287 | 10.61291795 | 18.31109993  | 11.51742969 | 13.53833025 | 10.04117829 | 27.8275762  | 33.02141224 | 47.92687961 | 20.39199693 |
| ENSMUSG000000018893 | -4.31766158  | 0.300102919  | 11.47670632 | 0.000704739 | 0.458527266 | Mb           | Mb              | MB              | 8.281243958 | 0           | 1.88496617   | 0.555056852 | 0.261610246 | 0.218286485 | 0.064715293 | 0.207247357 | 0           | 0           |
| ENSMUSG000000085811 | 1.718990789  | 5.07862134   | 11.2430033  | 0.000799237 | 0.458527266 | Gm11669      | Cep112t         |                 | 6.667103186 | 14.40748079 | 26.92808814  | 15.74973819 | 17.46248395 | 20.00959442 | 13.33135046 | 36.40645241 | 114.0031185 | 41.17614764 |
| ENSMUSG000000032554 | -0.902840044 | 6.791235894  | 11.13357788 | 0.000847789 | 0.458527266 | Trf          | Trf             | TF              | 137.0616055 | 234.4328356 | 131.4763903  | 108.6523789 | 139.7652741 | 125.3692043 | 61.4181351  | 92.50140376 | 44.15558417 | 60.5877601  |
| ENSMUSG000000021136 | -1.617256239 | 3.098174321  | 11.13291305 | 0.000848093 | 0.458527266 | Smoc1        | Smoc1           | SMOC1           | 11.64988557 | 25.96903945 | 12.45424076  | 8.187088573 | 7.913709953 | 4.220205368 | 2.459181152 | 8.151729382 | 1.021392516 | 4.444409586 |
| ENSMUSG000000097877 | 4.205454396  | -0.561494225 | 11.09004266 | 0.000867925 | 0.458527266 | Gm26703      | Gm26703         |                 | 0           | 0           | 0.269280881  | 0           | 0           | 0.218286485 | 0.323576467 | 0.621742072 | 1.964216377 | 1.764692042 |
| ENSMUSG000000041577 | -1.826075869 | 2.628430387  | 11.01627749 | 0.000903153 | 0.458527266 | Prelp        | Prelp           | PRELP           | 3.36864161  | 23.12311732 | 5.520258068  | 9.64411281  | 7.128879214 | 6.548594537 | 1.48845175  | 1.72706131  | 1.021392516 | 2.941153403 |
| ENSMUSG000000078886 | -6.514639845 | -0.903573355 | 11.00567855 | 0.000908332 | 0.458527266 | Gm2026       | Gm2026          | ZNF788          | 0           | 2.490181865 | 1.481044848  | 0           | 0           | 0           | 0           | 0           | 0           | 0           |
| ENSMUSG000000064360 | 1.642483178  | 8.058736663  | 10.94206968 | 0.000940051 | 0.458527266 | mt-Nd3       | mt-Nd3          | MT-ND3          | 76.70677666 | 85.08121372 | 248.6135737  | 136.1970752 | 121.1909466 | 99.97520993 | 188.3862193 | 301.5449047 | 729.7456685 | 465.878699  |
| ENSMUSG000000065947 | 1.874747059  | 8.700143056  | 10.84888904 | 0.00096952  | 0.458527266 | mt-Nd4l      | mt-Nd4l         | MT-ND4L         | 90.25152313 | 98.77721398 | 275.9455832  | 232.0831464 | 221.1914633 | 107.6152369 | 170.5247983 | 656.1451328 | 1252.855774 | 666.9228738 |
| ENSMUSG000000082651 | 6.432117322  | -1.112286081 | 10.85640616 | 0.000984546 | 0.458527266 | Gm14001      | Gm14001         |                 | 0           | 0           | 0            | 0           | 0           | 0           | 0           | 0           | 1.492804447 | 1.633974113 |
| ENSMUSG000000048450 | 1.899760116  | 0.950836912  | 10.84416523 | 0.000991075 | 0.458527266 | Msx1         | Msx1            | MSX1            | 0.771980369 | 0.355740266 | 0.942483085  | 0.485674746 | 1.438856355 | 3.056010784 | 2.135604685 | 2.279720929 | 3.69272679  | 2.418281687 |
| ENSMUSG000000052005 | 1.948595267  | 9.118617308  | 10.57928301 | 0.00114362  | 0.5098179   | Gm9864       | Gm9864          |                 | 142.3952881 | 155.8735267 | 309.5383731  | 418.9985414 | 140.1576895 | 197.330982  | 203.982605  | 553.4886086 | 2116.403862 | 697.837664  |
| ENSMUSG000000011254 | 1.611501687  | 5.301897211  | 10.53585392 | 0.001170808 | 0.5098179   | Thg1l        | Thg1l           | THG1L           | 16.84320805 | 13.93316044 | 30.36141937  | 22.2716562  | 16.80845833 | 24.88465924 | 19.99702569 | 20.310241   | 133.4095764 | 59.86881149 |
| ENSMUSG000000095474 | -6.394865247 | -1.047889729 | 10.4261686  | 0.001242422 | 0.525544584 | Gm6604       | Cldn34c2        | CLDN34          | 1.754500839 | 0           | 0            | 1.80393477  | 0           | 0           | 0           | 0           | 0           | 0           |
| ENSMUSG000000066245 | -6.10486931  | 2.701491479  | 10.28183498 | 0.001343463 | 0.55249904  | Gm10156      | Gm10156         |                 | 64.91653103 | 1.185800888 | 0            | 0           | 0.719428178 | 0           | 0.841298815 | 0           | 0           | 0           |
| ENSMUSG000000021250 | -1.004345309 | 4.788438814  | 10.1904616  | 0.00141169  | 0.564866658 | Fos          | Fos             | FOS             | 67.1622921  | 36.64124744 | 33.92939105  | 21.2309246  | 33.22450129 | 18.04501606 | 17.73199041 | 28.8764651  | 10.60676844 | 13.39858772 |
| ENSMUSG000000041515 | -0.747067488 | 5.137053493  | 10.10894745 | 0.001475512 | 0.574867275 | Irf8         | Irf8            | IRF8            | 63.23221022 | 51.28588841 | 37.093444141 | 38.29892282 | 38.91452415 | 40.16471316 | 21.35604685 | 24.59335305 | 18.07079067 | 25.16320133 |

|                    |              |              |             |             |             |          |          |          |             |              |             |             |             |             |             |             |             |             |
|--------------------|--------------|--------------|-------------|-------------|-------------|----------|----------|----------|-------------|--------------|-------------|-------------|-------------|-------------|-------------|-------------|-------------|-------------|
| ENSMUSG00000064363 | 1.825174041  | 11.97457019  | 9.86098719  | 0.001688205 | 0.64086857  | mt-Nd4   | mt-Nd4   | MT-ND4   | 745.2417762 | 1031.409613  | 2652.820603 | 2670.100988 | 1994.712726 | 1019.97998  | 1716.767305 | 5819.989367 | 12716.49396 | 5982.502098 |
| ENSMUSG00000020681 | -1.36386389  | 4.89422581   | 9.688364869 | 0.001854385 | 0.681346284 | Ace      | Ace      | ACE      | 42.45892029 | 103.9354478  | 18.44574037 | 24.07559097 | 34.20553971 | 39.07328074 | 14.30207986 | 10.98410993 | 5.028393926 | 16.73189491 |
| ENSMUSG00000030470 | -5.768160983 | -0.437420408 | 9.656453006 | 0.001886876 | 0.681346284 | Csrp3    | Csrp3    | CSRp3    | 3.649361744 | 0            | 2.558168373 | 0           | 0           | 0.072762162 | 0           | 0           | 0           | 0           |
| ENSMUSG00000020695 | -0.775453071 | 5.461917448  | 9.324849246 | 0.002260669 | 0.721820238 | Mrc2     | Mrc2     | MRC2     | 47.72242281 | 86.02985443  | 38.30520537 | 58.55849793 | 57.35804652 | 51.22456171 | 30.28675735 | 31.01802112 | 18.07079067 | 30.91479021 |
| ENSMUSG00000089726 | 1.283230005  | 2.957846035  | 9.321859028 | 0.002264361 | 0.721820238 | Mir17hg  | Mir17hg  |          | 3.36864161  | 3.379532531  | 5.116336746 | 3.746633754 | 7.586697145 | 9.168032352 | 5.177223478 | 8.980718811 | 14.14235792 | 13.20251083 |
| ENSMUSG00000033427 | 2.241392337  | 0.545319293  | 9.308029264 | 0.002281518 | 0.721820238 | Upb1     | Upb1     | UPB1     | 0.421080201 | 0.652190488  | 0.538561763 | 0.485674746 | 0.327012808 | 0.873145938 | 0.388291761 | 2.625133191 | 3.8498641   | 2.352922722 |
| ENSMUSG00000030730 | -2.63683871  | 0.838815006  | 9.27480007  | 0.00232328  | 0.721820238 | Atp2a1   | Atp2a1   | ATP2A1   | 8.702324159 | 0.592900444  | 4.241173882 | 0.624438959 | 0.784830739 | 0.145524323 | 0.129430587 | 0.483577167 | 0.31427462  | 1.045743432 |
| ENSMUSG00000026208 | -2.843231251 | 2.292540922  | 9.170920509 | 0.002458909 | 0.721820238 | Des      | Des      | DES      | 32.70389563 | 1.660121243  | 8.616988204 | 0           | 1.24264867  | 1.600767553 | 1.553167044 | 0.898071881 | 0.628549241 | 1.045743432 |
| ENSMUSG00000064341 | 1.693031268  | 12.2637286   | 9.151378648 | 0.002485307 | 0.721820238 | mt-Nd1   | mt-Nd1   | MT-ND1   | 1197.201192 | 1178.448923  | 3764.546722 | 3502.963795 | 2274.962703 | 1573.481743 | 2232.677625 | 6189.994982 | 15403.14913 | 7264.583546 |
| ENSMUSG00000030020 | 2.429963086  | 2.321713552  | 9.144403774 | 0.002494799 | 0.721820238 | Prickle2 | Prickle2 | PRICKLE2 | 0.491260235 | 2.608761954  | 1.548365068 | 2.914048475 | 0.261610246 | 1.746291877 | 1.29430587  | 1.796143762 | 18.77790857 | 12.35284429 |
| ENSMUSG00000052825 | 0.981909054  | 5.902334938  | 9.135017267 | 0.002507631 | 0.721820238 | Gm9892   | Gm9892   |          | 14.80798708 | 49.09215677  | 53.18297407 | 38.99274388 | 51.92963391 | 51.29732387 | 93.3194532  | 72.95106973 | 90.9825026  | 61.30670871 |
| ENSMUSG00000049699 | 1.407820925  | 2.797702077  | 9.132177002 | 0.002511527 | 0.721820238 | Ucn2     | Ucn2     | UCN2     | 2.315941107 | 2.490181865  | 5.92417939  | 4.162926393 | 4.447374189 | 6.475832375 | 3.753487022 | 9.257048621 | 12.17814154 | 14.50969012 |
| ENSMUSG00000035692 | -0.732881643 | 5.898064173  | 9.130203379 | 0.002514238 | 0.721820238 | Isg15    | Isg15    | ISG15    | 70.39057364 | 72.80817453  | 111.818886  | 79.442512   | 49.64054425 | 57.26382112 | 37.21129375 | 52.64082872 | 29.85608894 | 41.76437832 |
| ENSMUSG00000079186 | -1.393435558 | 5.790240692  | 9.114964579 | 0.002535269 | 0.721820238 | Gzmc     | Gzmc     | GZMB     | 165.4143391 | 151.0117431  | 38.30520537 | 42.87814185 | 21.38663764 | 25.53951869 | 14.94923279 | 48.21955177 | 23.25632191 | 33.20235397 |
| ENSMUSG00000040729 | 1.545650551  | 5.815656217  | 8.929573113 | 0.002805899 | 0.764195265 | AK129341 | Cep126   | CEP126   | 20.00130956 | 16.24547217  | 35.27579546 | 20.39833933 | 57.94666957 | 22.77455656 | 18.8968657  | 197.0922367 | 70.94749555 | 76.6007064  |
| ENSMUSG00000049382 | 1.225695989  | 4.217663065  | 8.924829541 | 0.002813196 | 0.764195265 | Krt8     | Krt8     | KRT8     | 8.702324159 | 17.78701332  | 13.59868451 | 7.770795933 | 9.744981678 | 68.25090751 | 17.73199041 | 22.93573419 | 16.73512354 | 7.97379367  |
| ENSMUSG00000064370 | 1.71529546   | 12.67301451  | 8.908183173 | 0.002838956 | 0.764195265 | mt-Cytb  | mt-Cytb  | MT-CYB   | 1544.101098 | 1558.083077  | 4628.332469 | 4729.847586 | 3178.891506 | 1831.423606 | 2574.827382 | 8454.241442 | 20566.44543 | 10039.46374 |
| ENSMUSG00000058542 | -2.730478079 | 5.450416311  | 8.736771559 | 0.003118562 | 0.824469774 | Gm15590  | Gm15590  |          | 227.8745689 | 124.6276733  | 6.664701814 | 7.007592761 | 35.2519807  | 32.5246862  | 14.56094103 | 8.773471454 | 0           | 5.424794054 |
| ENSMUSG00000022122 | -1.030477308 | 3.403418336  | 8.700738031 | 0.003180812 | 0.826174165 | Ednrb    | Ednrb    | EDNRB    | 13.26402634 | 19.6250047   | 11.64639812 | 15.05591712 | 13.14591488 | 11.13261071 | 8.9307105   | 5.941090906 | 2.671334273 | 5.816947841 |
| ENSMUSG00000064364 | 1.718713217  | 4.419897721  | 8.609225028 | 0.003344646 | 0.853749685 | mt-Th    | mt-Th    |          | 4.421342113 | 4.091013064  | 14.67580803 | 19.35760773 | 8.044515076 | 6.839643183 | 10.09558578 | 26.25133191 | 69.76896573 | 28.75794438 |
| ENSMUSG00000067931 | 0.847167448  | 4.648637306  | 8.449295073 | 0.00365185  | 0.881112864 | Zfp948   | Zfp948   |          | 19.65040939 | 18.0241735   | 21.54247051 | 11.03175494 | 22.89089656 | 19.13644848 | 28.99245148 | 38.34076108 | 33.86309035 | 29.54225196 |
| ENSMUSG00000064345 | 1.710941617  | 11.51168331  | 8.443700314 | 0.003663101 | 0.881112864 | mt-Nd2   | mt-Nd2   | MT-ND2   | 644.7439681 | 660.1946445  | 2223.923479 | 2168.19083  | 1301.707183 | 833.9998954 | 1147.272723 | 3556.019237 | 9529.98502  | 4276.175612 |
| ENSMUSG00000064356 | 1.621106124  | 9.29007698   | 8.440570595 | 0.003669411 | 0.881112864 | mt-Atp8  | mt-Atp8  | MT-ATP8  | 168.5724406 | 180.8939255  | 454.8154086 | 489.5601438 | 279.9883662 | 183.4334092 | 235.1106612 | 919.2111116 | 1847.541925 | 937.7704227 |
| ENSMUSG00000064351 | 1.665722116  | 14.22016256  | 8.379916284 | 0.003793899 | 0.881112864 | mt-Co1   | mt-Co1   | MT-CO1   | 4841.018714 | 5085.959299  | 13792.49942 | 13990.27735 | 9225.489131 | 4618.942013 | 7319.234977 | 27263.04442 | 58666.74335 | 28144.22371 |
| ENSMUSG00000054702 | 1.390029174  | 4.648258232  | 8.373742904 | 0.003806808 | 0.881112864 | Ap1s3    | Ap1s3    | AP1S3    | 8.842684226 | 9.01208675   | 24.77384109 | 15.05591712 | 13.53833025 | 11.13261071 | 10.48387754 | 33.57407186 | 62.54064946 | 43.13691657 |
| ENSMUSG00000015437 | -1.530388535 | 4.053219536  | 8.3727296   | 0.003808931 | 0.881112864 | Gzmb     | Gzmb     | GZMB     | 41.89748002 | 60.4758453   | 12.31960032 | 7.63203172  | 6.082438228 | 10.98708639 | 5.371369359 | 12.98750105 | 3.614158135 | 8.823460208 |
| ENSMUSG00000028391 | 1.35468833   | 7.382421263  | 8.342696214 | 0.003872409 | 0.882015562 | Wdr31    | Wdr31    | WDR31    | 68.07463254 | 66.582771987 | 110.1358805 | 163.9499178 | 70.89637677 | 88.76983706 | 94.67847436 | 163.4490824 | 463.2407905 | 248.494783  |
| ENSMUSG00000083563 | 1.580033654  | 4.930036738  | 8.285295957 | 0.003996739 | 0.892253506 | Gm13340  | Gm13340  |          | 8.632144126 | 7.411255551  | 24.1679591  | 23.10424148 | 14.84638148 | 7.494502637 | 12.8783434  | 44.62726425 | 87.76118774 | 46.27414687 |
| ENSMUSG00000028459 | -1.925811695 | 3.30078242   | 8.266696302 | 0.004037892 | 0.892253506 | Cd72     | Cd72     | CD72     | 26.73859278 | 19.44713457  | 13.80064517 | 11.72557601 | 8.436930446 | 13.82481069 | 5.371369359 | 1.519813953 | 0.078568655 | 1.30717929  |
| ENSMUSG00000039264 | -1.189042269 | 2.209300737  | 8.174492802 | 0.004248355 | 0.92495428  | Gimap3   | Gimap3   | GIMAP5   | 10.456825   | 4.802493597  | 5.85685917  | 5.61995063  | 5.75542542  | 4.147443207 | 2.718042326 | 2.072473572 | 1.649941757 | 2.941153403 |
| ENSMUSG00000024331 | -2.786197742 | 2.686447178  | 7.988587142 | 0.004707313 | 0.999071534 | Dsc2     | Dsc2     | DSC2     | 20.21184966 | 28.87425163  | 3.971893    | 3.81601586  | 0.719428178 | 2.037340523 | 0           | 2.141556024 | 0           | 3.790819941 |
| ENSMUSG00000092014 | 2.97372767   | -0.121994245 | 7.936586251 | 0.004844514 | 0.999071534 | Gm4468   | Gm4468   |          | 0.210540101 | 0.177870133  | 0.06732022  | 0.20814632  | 0.261610246 | 0.145524323 | 0.129430587 | 0.207247357 | 2.592765618 | 3.398666154 |
| ENSMUSG00000020399 | -0.822142624 | 4.119111344  | 7.901916017 | 0.004938246 | 0.999071534 | Havcr2   | Havcr2   | HAVCR2   | 32.6337156  | 32.19449411  | 16.62809442 | 16.58232347 | 16.87386089 | 15.28005392 | 13.00777399 | 13.19474841 | 7.85686551  | 11.63389568 |
| ENSMUSG00000030325 | -2.389268171 | 0.114655203  | 7.835074247 | 0.005124205 | 0.999071534 | Klrb1c   | Klrb1c   | KLRB1    | 1.333420637 | 1.363671021  | 1.615685288 | 2.22022741  | 1.63506404  | 0.436572969 | 0.517722348 | 0           | 0.471411931 | 0           |
| ENSMUSG00000021253 | -0.751572692 | 4.59605275   | 7.765487347 | 0.005325393 | 0.999071534 | Tgfb3    | Tgfb3    | TGFB3    | 29.05453389 | 40.79155055  | 26.12024549 | 23.17362359 | 38.3259011  | 29.83248622 | 19.15572687 | 15.33630443 | 8.956826681 | 16.60117698 |
| ENSMUSG00000025161 | -0.91614994  | 5.010225906  | 7.752316779 | 0.005364368 | 0.999071534 | Slc16a3  | Slc16a3  | SLC16A3  | 59.51266844 | 60.12010503  | 29.48625651 | 35.73178487 | 33.74772178 | 17.89949173 | 31.12805616 | 34.5412262  | 8.721120716 | 15.81686941 |
| ENSMUSG00000064358 | 1.570352745  | 13.64800788  | 7.668017922 | 0.005620817 | 0.999071534 | mt-Co3   | mt-Co3   | MT-CO3   | 3548.232316 | 3606.494821  | 9834.676349 | 10363.32773 | 5776.812058 | 3393.045116 | 5182.918424 | 17592.05375 | 39267.19958 | 17924.82673 |
| ENSMUSG00000033152 | -1.467953851 | 1.514705117  | 7.647437522 | 0.005685302 | 0.999071534 | Podxl2   | Podxl2   | PODXL2   | 2.17558104  | 4.921073686  | 5.452937848 | 5.134275885 | 2.87771271  | 2.910486461 | 1.359021163 | 1.036236786 | 0.392843275 | 1.633974113 |
| ENSMUSG00000062184 | 2.38421572   | 0.985789895  | 7.621191869 | 0.005768635 | 0.999071534 | Hs6st2   | Hs6st2   | HS6ST2   | 2.105401006 | 0.237160178  | 0.134640441 | 0           | 0.654025616 | 4.438491853 | 7.506974044 | 0.898071881 | 1.257098482 | 1.503256184 |

|                     |              |              |             |             |             |               |               |           |             |             |             |             |             |             |             |             |             |             |
|---------------------|--------------|--------------|-------------|-------------|-------------|---------------|---------------|-----------|-------------|-------------|-------------|-------------|-------------|-------------|-------------|-------------|-------------|-------------|
| ENSMUSG00000061615  | -4.33799278  | -0.976687378 | 7.545493822 | 0.006016033 | 0.999071534 | Hist1h2ab     | Hist1h2ab     | HIST1H2AB | 1.263240604 | 1.185800888 | 1.211763966 | 0           | 0           | 0.145524323 | 0           | 0           | 0           | 0           |
| ENSMUSG00000062248  | 1.073681832  | 5.932894637  | 7.52740021  | 0.006076754 | 0.999071534 | Cks2          | Cks2          | CKS2      | 28.98435385 | 20.87009563 | 51.634609   | 48.7062388  | 52.77986721 | 38.41842128 | 80.76468626 | 63.62493865 | 143.1520896 | 45.09768551 |
| ENSMUSG00000057933  | -4.129728978 | -1.112210813 | 7.282618863 | 0.006962496 | 0.999071534 | Gsta2         | Gsta2         | GSTA1     | 1.19306057  | 0.474320355 | 1.548365068 | 0           | 0           | 0.072762162 | 0.064715293 | 0           | 0           | 0           |
| ENSMUSG00000030672  | -2.435311139 | 1.780666879  | 7.22063601  | 0.007207017 | 0.999071534 | Mylpf         | Mylpf         | MYLPF     | 16.98356812 | 1.067220799 | 10.03071283 | 0           | 1.24264867  | 0.727621615 | 0.711868228 | 1.519813953 | 0.785686551 | 1.111102397 |
| ENSMUSG00000035547  | -0.823332839 | 3.725786794  | 7.10446261  | 0.007689227 | 0.999071534 | Capn5         | Capn5         | CAPN5     | 15.93086761 | 24.54607838 | 11.78103856 | 15.26406344 | 19.55536592 | 14.33414582 | 6.989251696 | 11.19135729 | 6.285492408 | 7.843075741 |
| ENSMUSG00000017446  | -0.984010098 | 3.734152346  | 7.093596115 | 0.007735987 | 0.999071534 | C1qtnf1       | C1qtnf1       | C1QTNF1   | 21.1241901  | 30.83082309 | 10.77123525 | 13.25198235 | 15.30419941 | 15.35281608 | 12.68419752 | 6.977327692 | 4.00700141  | 5.555511983 |
| ENSMUSG00000064357  | 1.652542656  | 12.7063352   | 7.083423379 | 0.007780024 | 0.999071534 | mt-Atp6       | mt-Atp6       | MT-ATP6   | 843.6341832 | 1632.432793 | 5263.094826 | 5344.642432 | 3416.041195 | 1628.999272 | 2840.160085 | 8163.818812 | 22023.97255 | 9036.922586 |
| ENSMUSG00000008999  | -1.666582605 | 2.389095345  | 7.03431074  | 0.007996264 | 0.999071534 | Bmp7          | Bmp7          | BMP7      | 2.596661241 | 18.79494408 | 2.221567271 | 11.10113705 | 5.166802366 | 1.091432423 | 2.588611739 | 3.661369977 | 0.549980586 | 3.856178906 |
| ENSMUSG00000030077  | 2.371254878  | 0.396014949  | 7.027916155 | 0.008024868 | 0.999071534 | Chl1          | Chl1          | CHL1      | 0.771980369 | 0.5336104   | 0.471241542 | 0           | 0.196207685 | 4.438491853 | 4.141778783 | 0.207247357 | 0.471411931 | 1.045744342 |
| ENSMUSG00000032925  | -1.398001551 | 1.84267745   | 6.995805793 | 0.008170092 | 0.999071534 | Itgbl1        | Itgbl1        | ITGBL1    | 1.543960738 | 6.106874574 | 2.827449254 | 7.978942253 | 7.259684337 | 2.328389169 | 1.553167044 | 2.141556024 | 0.864255206 | 2.418281687 |
| ENSMUSG00000015243  | -0.852009379 | 5.705461159  | 6.982912095 | 0.00822916  | 0.999071534 | Abca1         | Abca1         | ABCA1     | 50.95070435 | 129.7266172 | 52.50977187 | 55.64444945 | 59.7779413  | 54.86266979 | 39.28218314 | 50.98284987 | 12.72812213 | 27.90827784 |
| ENSMUSG00000033860  | 4.14988482   | 1.200646642  | 6.861738386 | 0.008806084 | 0.999071534 | Fgg           | Fgg           | FGG       | 0           | 0           | 1.144443746 | 0           | 0           | 21.31931333 | 0           | 0.069082452 | 0.549980586 | 1.633974113 |
| ENSMUSG00000035357  | -0.654420414 | 4.27501236   | 6.830553003 | 0.008961152 | 0.999071534 | Pdzn3         | Pdzn3         | PDZRN3    | 22.03653053 | 25.31684896 | 28.1398521  | 23.86744465 | 22.49848119 | 20.2278809  | 11.45460695 | 15.12905707 | 13.27810271 | 12.48356222 |
| ENSMUSG00000004612  | -1.033468869 | 2.448013066  | 6.808012193 | 0.009074973 | 0.999071534 | Nkg7          | Nkg7          | NKG7      | 9.965564763 | 7.351965506 | 6.732022034 | 7.285121188 | 5.75542542  | 4.29296753  | 1.812028217 | 3.868617334 | 2.985608894 | 3.92153787  |
| ENSMUSG00000042834  | -0.929546801 | 6.202814472  | 6.755946232 | 0.009343578 | 0.999071534 | Nrep          | Nrep          | NREP      | 81.33865887 | 58.57856387 | 229.8312322 | 65.7048549  | 64.5523283  | 63.73965349 | 27.8275762  | 45.38717122 | 41.09140662 | 68.03868205 |
| ENSMUSG00000044934  | 0.668696331  | 4.735922747  | 6.746659714 | 0.009392336 | 0.999071534 | Zfp367        | Zfp367        | ZNF367    | 16.98356812 | 19.15068434 | 22.21567271 | 25.67137942 | 21.77905301 | 40.96509694 | 27.89229149 | 27.01123889 | 36.9272679  | 23.07171447 |
| ENSMUSG00000071562  | 2.920618468  | -0.72823076  | 6.729962113 | 0.009480661 | 0.999071534 | Stfa1         | Stfa1         | CSTA      | 0           | 0           | 0           | 0.416292639 | 0.130805123 | 0.363810808 | 0.517722348 | 1.381649048 | 1.021392516 | 0.71894861  |
| ENSMUSG00000075270  | 2.38103989   | -0.246141089 | 6.651063723 | 0.009909665 | 0.999071534 | Pde11a        | Pde11a        | PDE11A    | 0           | 0.237160178 | 0.471241542 | 0.20814632  | 0.261610246 | 0.873145938 | 0.19414588  | 0.621742072 | 1.492804447 | 2.548999616 |
| ENSMUSG00000092167  | -1.966522695 | 0.689885134  | 6.641135289 | 0.009965041 | 0.999071534 | Gm3696        | Gm3696        |           | 1.403600671 | 0.889350666 | 5.116336746 | 2.844666369 | 1.831271725 | 0.436572969 | 1.035444696 | 0.27632981  | 0           | 1.176461361 |
| ENSMUSG00000090231  | -0.838920443 | 4.661458124  | 6.486562011 | 0.010869299 | 0.999071534 | Cfb           | Cfb           | CFB       | 36.98487768 | 38.41994878 | 46.58559248 | 22.75733095 | 23.34871449 | 41.0378591  | 16.50239984 | 9.118883716 | 9.899650542 | 16.0129463  |
| ENSMUSG00000085408  | 2.188909148  | -0.204099899 | 6.472824993 | 0.010953628 | 0.999071534 | C530005A16Rik | C530005A16Rik |           | 0.070180034 | 0.592900444 | 0.06732022  | 0.485674746 | 0.130805123 | 0.654859454 | 0.517722348 | 1.72706131  | 1.178529826 | 1.699333077 |
| ENSMUSG00000007682  | -0.921317454 | 3.934313598  | 6.456159787 | 0.011056835 | 0.999071534 | Dio2          | Dio2          | DIO2      | 23.6506713  | 33.97319545 | 14.13724627 | 19.77390037 | 11.38004572 | 20.73721603 | 5.436084652 | 8.151729382 | 8.563983406 | 9.411690889 |
| ENSMUSG00000020435  | -1.528816666 | 1.509069558  | 6.419532113 | 0.01128719  | 0.999071534 | Osbp2         | Osbp2         | OSBP2     | 4.912602348 | 8.774926572 | 3.298690797 | 1.942698983 | 2.027479409 | 0.727621615 | 0.776583522 | 2.901463001 | 0.628549241 | 1.568615148 |
| ENSMUSG00000022320  | -1.199243288 | 1.999026074  | 6.406738343 | 0.011368806 | 0.999071534 | Osr2          | Osr2          | OSR2      | 4.210802013 | 4.861783641 | 6.395420932 | 8.117706466 | 4.054958819 | 3.638108076 | 1.423736457 | 1.243484143 | 1.492804447 | 3.790819941 |
| ENSMUSG00000055368  | -1.28012358  | 2.909155026  | 6.403471183 | 0.011389746 | 0.999071534 | Slc6a2        | Slc6a2        | SLC6A2    | 5.895122818 | 21.81873634 | 5.722218729 | 9.158438064 | 11.70705853 | 3.929156722 | 1.812028217 | 9.53337843  | 2.78490998  | 3.137230296 |
| ENSMUSG00000037035  | -0.713219199 | 5.777721356  | 6.392584436 | 0.011459806 | 0.999071534 | Inhbb         | Inhbb         | INHBB     | 47.44170267 | 102.1567465 | 69.27250673 | 69.24334234 | 64.29071805 | 30.41458352 | 28.28058325 | 63.90126846 | 31.34889338 | 43.2676345  |
| ENSMUSG00000022768  | 2.259918384  | -0.42403097  | 6.386577501 | 0.011498652 | 0.999071534 | Ccdc116       | Ccdc116       | CCDC116   | 0.491260235 | 0.355740266 | 0.06732022  | 0.069382107 | 0.130805123 | 0.582097292 | 0.323576467 | 1.036236786 | 1.571373102 | 1.30717929  |
| ENSMUSG00000031465  | -1.017775768 | 3.828579627  | 6.348628436 | 0.011747209 | 0.999071534 | Angpt2        | Angpt2        | ANGPT2    | 12.28150587 | 44.88256362 | 11.51175768 | 9.713494917 | 20.14398897 | 7.494502637 | 11.97232929 | 10.98410993 | 6.049786443 | 8.235229528 |
| ENSMUSG000000028399 | 2.16740434   | -0.00324819  | 6.327901992 | 0.011885284 | 0.999071534 | Ptprd         | Ptprd         | PTPRD     | 0.350900168 | 0.118580089 | 0.673202203 | 0.069382107 | 0.457817931 | 1.018670261 | 1.68259763  | 0.207247357 | 2.592765618 | 1.176461361 |
| ENSMUSG000000085241 | 0.986045743  | 4.329608087  | 6.322913427 | 0.011918765 | 0.999071534 | Snhg3         | Snhg3         |           | 8.842684226 | 6.699775018 | 18.44574037 | 19.98204669 | 14.97718661 | 13.16995124 | 16.8259763  | 22.38271458 | 36.69156193 | 32.61412329 |
| ENSMUSG000000031273 | -2.108224135 | 0.326289554  | 6.278972348 | 0.012217893 | 0.999071534 | Col4a6        | Col4a6        | COL4A6    | 2.035220973 | 2.608761954 | 0.807842644 | 0.971349492 | 3.008517833 | 0.727621615 | 0.776583522 | 0           | 0           | 0.588230681 |
| ENSMUSG000000067352 | 0.974656492  | 5.514894747  | 6.266453795 | 0.012304516 | 0.999071534 | Gm14149       | Gm14149       |           | 42.73964043 | 20.81080559 | 34.06403149 | 42.3924671  | 18.57432749 | 36.16279428 | 28.86302089 | 41.31130653 | 107.4819202 | 58.30019634 |
| ENSMUSG00000093673  | 2.007410375  | 0.705669625  | 6.248900695 | 0.012427041 | 0.999071534 | Gm20644       | Gm20644       |           | 0.491260235 | 0.237160178 | 1.077123525 | 0.277528426 | 1.111843547 | 0.727621615 | 0.517722348 | 1.381649048 | 6.206923753 | 1.830051006 |
| ENSMUSG000000046794 | -1.170489365 | 3.368943078  | 6.233066932 | 0.012538639 | 0.999071534 | Ppp1r3b       | Ppp1r3b       | PPP1R3B   | 17.96608859 | 33.73603527 | 5.99149961  | 7.285121188 | 8.894748377 | 8.14936209  | 8.154126978 | 8.013564478 | 2.78490998  | 4.509768551 |
| ENSMUSG000000020423 | -0.75655571  | 4.403797605  | 6.227865425 | 0.012575524 | 0.999071534 | Btg2          | Btg2          | BTG2      | 46.038102   | 33.49887509 | 24.30259954 | 15.19468133 | 19.22835311 | 19.2819728  | 17.34369865 | 18.30684988 | 9.742513232 | 11.89533154 |
| ENSMUSG000000052957 | -0.718859502 | 7.517726024  | 6.207920055 | 0.012717998 | 0.999071534 | Gas1          | Gas1          | GAS1      | 156.7120149 | 314.7708458 | 209.5005257 | 265.3865575 | 232.6369116 | 143.5597447 | 110.469006  | 201.0990189 | 81.00428341 | 136.5348769 |
| ENSMUSG000000002985 | -0.725574085 | 10.13916587  | 6.201840378 | 0.012761755 | 0.999071534 | Apoe          | Apoe          | APOE      | 1402.33743  | 1884.830512 | 1045.617662 | 1403.600015 | 1568.353427 | 1087.721553 | 1029.102597 | 958.8644392 | 360.2372836 | 780.77819   |
| ENSMUSG000000034762 | -1.27654741  | 1.789479769  | 6.190143983 | 0.012846373 | 0.999071534 | Gli1          | Gli1          | GLI1      | 5.54422265  | 5.573264174 | 4.847055865 | 5.203657991 | 3.139322957 | 1.45524323  | 0.582437641 | 3.385040167 | 1.649941757 | 2.091486864 |
| ENSMUSG00000030247  | -1.082157225 | 2.540233803  | 6.186283562 | 0.012874428 | 0.999071534 | Kcnj8         | Kcnj8         | KCNJ8     | 7.368903522 | 14.22961066 | 9.020909526 | 3.81601586  | 5.820827982 | 3.783632399 | 3.624056435 | 4.766689215 | 1.571373102 | 4.052255799 |

|                    |              |              |             |             |             |               |               |         |             |             |             |             |             |             |             |             |             |             |
|--------------------|--------------|--------------|-------------|-------------|-------------|---------------|---------------|---------|-------------|-------------|-------------|-------------|-------------|-------------|-------------|-------------|-------------|-------------|
| ENSMUSG00000097099 | 1.573169796  | 1.666309022  | 6.172101721 | 0.012978034 | 0.999071534 | Gm9917        | Gm9917        |         | 1.263240604 | 0.948640711 | 4.039213221 | 0.346910533 | 1.438856355 | 3.056010784 | 2.006174098 | 2.625133191 | 7.385453579 | 5.94766577  |
| ENSMUSG00000029208 | 0.610808115  | 5.118432375  | 6.155540673 | 0.013100106 | 0.999071534 | Guf1          | Guf1          | GUF1    | 30.31777449 | 27.74774078 | 24.30259954 | 32.95650061 | 26.42263488 | 30.85115649 | 36.24056435 | 40.3441522  | 45.33411399 | 43.72514725 |
| ENSMUSG00000030218 | -1.19107451  | 3.884436387  | 6.155343508 | 0.013101567 | 0.999071534 | Mgp           | Mgp           | MGP     | 10.456825   | 17.66843323 | 46.38363182 | 19.63513615 | 10.79142266 | 23.0656052  | 6.600959935 | 2.970545453 | 4.00700141  | 9.803844676 |
| ENSMUSG00000062006 | 0.759368324  | 5.895616818  | 6.127234684 | 0.013311492 | 0.999071534 | RpB4          | RpB4          | RPL34   | 36.70415754 | 41.9180614  | 57.55878839 | 49.7469704  | 42.25005479 | 32.16087539 | 82.25313801 | 69.15153485 | 95.69662191 | 63.72499039 |
| ENSMUSG00000002603 | -0.720957594 | 6.21403103   | 6.12593141  | 0.013321309 | 0.999071534 | Tgfb1         | Tgfb1         | TGFB1   | 106.3929308 | 147.8100807 | 67.79146188 | 71.53295185 | 87.63943254 | 103.6860802 | 65.29773112 | 48.08138687 | 23.17775325 | 43.92122415 |
| ENSMUSG00000068227 | -1.284786036 | 3.263377722  | 6.124721955 | 0.013330425 | 0.999071534 | IL2rb         | IL2rb         | IL2RB   | 24.91391191 | 24.30891821 | 4.779735644 | 8.325852786 | 7.913709953 | 9.459080998 | 3.235764674 | 6.908245239 | 1.021392516 | 7.320204025 |
| ENSMUSG00000021765 | 0.680107966  | 4.569909632  | 6.105508425 | 0.013476118 | 0.999071534 | Fst           | Fst           | FST     | 19.93112953 | 17.4905631  | 20.5326672  | 23.24300569 | 12.49188926 | 33.76164295 | 25.88611739 | 28.11655812 | 31.89887397 | 19.21553556 |
| ENSMUSG00000094286 | 1.807178475  | 0.504184477  | 6.097286    | 0.013538966 | 0.999071534 | Gm12424       | Gm12424       |         | 0.771980369 | 0.237160178 | 0.269280881 | 0.485674746 | 1.24264867  | 0.9459081   | 0.711868228 | 4.421276953 | 1.807079067 | 1.568615148 |
| ENSMUSG00000030671 | -0.78189761  | 3.664055907  | 6.081769772 | 0.013658387 | 0.999071534 | Pde3b         | Pde3b         | PDE3B   | 14.38690688 | 26.14690958 | 13.46404407 | 14.29271395 | 14.1269533  | 14.5524323  | 10.61330813 | 7.668152216 | 6.049786443 | 6.862691273 |
| ENSMUSG00000052748 | 0.735355326  | 4.740384473  | 6.060152627 | 0.013826573 | 0.999071534 | Swt1          | Swt1          | SWT1    | 22.73833087 | 17.96488346 | 22.8215547  | 18.80255087 | 21.38663764 | 19.35473496 | 23.36222095 | 30.3271966  | 44.46985879 | 35.62063566 |
| ENSMUSG00000067219 | 0.713003438  | 4.649438837  | 6.026693012 | 0.014091109 | 0.999071534 | Nipal1        | Nipal1        | NIPAL1  | 17.26428825 | 26.38406976 | 20.39802676 | 14.22333184 | 20.27479409 | 18.40882687 | 30.35147264 | 44.48909934 | 26.32049946 | 26.66645752 |
| ENSMUSG00000031070 | -0.848079078 | 3.641767294  | 6.014727226 | 0.014186971 | 0.999071534 | Mrgprf        | Mrgprf        | MIRGPRF | 10.94808523 | 22.94524719 | 11.04051614 | 19.84328247 | 17.33167882 | 11.86023233 | 11.19574577 | 10.50053276 | 4.085570065 | 6.013024734 |
| ENSMUSG00000058755 | -1.302985952 | 2.155284595  | 5.991584373 | 0.014374286 | 0.999071534 | Osm           | Osm           | OSM     | 12.07096577 | 8.774926572 | 5.116336746 | 2.150845303 | 4.120361381 | 2.910486461 | 1.229590576 | 4.490359406 | 0.942823861 | 2.61435858  |
| ENSMUSG00000083316 | 2.967720435  | -0.348282779 | 5.966208305 | 0.014582604 | 0.999071534 | Gm15185       | Gm15185       |         | 0           | 0.118580089 | 0.605881983 | 0           | 0.065402562 | 0.509335131 | 0.064715293 | 0.27632981  | 3.378452169 | 1.111102397 |
| ENSMUSG00000021732 | -1.098044185 | 2.58708261   | 5.949293007 | 0.01472319  | 0.999071534 | Fgf10         | Fgf10         | FGF10   | 5.684582717 | 13.04380977 | 3.500651458 | 7.63203172  | 11.77246109 | 3.710870238 | 2.9769035   | 6.217420715 | 2.592765618 | 2.483640651 |
| ENSMUSG00000035121 | -2.512604233 | -0.370375311 | 5.943724353 | 0.014769777 | 0.999071534 | Neil2         | Neil2         | NEIL2   | 2.315941107 | 2.01586151  | 0.605881983 | 0.485674746 | 0.196207685 | 0.291048646 | 0.129430587 | 0.483577167 | 0           | 0           |
| ENSMUSG00000086429 | 0.743947029  | 4.459169824  | 5.927955746 | 0.01490252  | 0.999071534 | Gt(ROSA)26Sor | Gt(ROSA)26Sor |         | 15.29924731 | 10.90936817 | 19.72482456 | 21.92474567 | 16.48144552 | 18.19054038 | 23.10335977 | 25.62958984 | 34.25593362 | 26.01286787 |
| ENSMUSG00000059479 | -0.984925646 | 2.367703151  | 5.922539856 | 0.014948395 | 0.999071534 | B3gnt8        | B3gnt8        | B3GNT8  | 10.456825   | 6.106874574 | 7.405224238 | 6.03624327  | 4.708984435 | 5.74821076  | 3.300479967 | 2.486968286 | 2.121353688 | 3.137230296 |
| ENSMUSG00000040314 | -1.707190627 | 2.952142635  | 5.921941724 | 0.01495347  | 0.999071534 | CtsG          | CtsG          | CTSG    | 25.26481208 | 28.34064123 | 1.279084186 | 4.440454819 | 1.765869163 | 2.837724299 | 2.070889391 | 7.046410144 | 1.649941757 | 3.529384083 |
| ENSMUSG00000035279 | -0.750242911 | 4.686854962  | 5.916160394 | 0.015002618 | 0.999071534 | Ssc5d         | Ssc5d         | SSC5D   | 18.59770889 | 41.44374104 | 38.43984582 | 39.2008902  | 28.18850405 | 28.30448083 | 9.577863435 | 24.10977589 | 11.47102364 | 20.91486864 |
| ENSMUSG00000064367 | 1.35962536   | 11.55805203  | 5.900193985 | 0.015139217 | 0.999071534 | mt-Nd5        | mt-Nd5        | MT-ND5  | 896.1990283 | 767.687495  | 2399.359973 | 3125.802664 | 1438.921758 | 1004.045067 | 1246.351837 | 4115.172607 | 8756.633748 | 3781.146815 |
| ENSMUSG00000094685 | 0.614865026  | 4.609113805  | 5.890049058 | 0.015226676 | 0.999071534 | Gm5900        | Gm5900        |         | 18.73806896 | 15.53399163 | 20.39802676 | 22.82671305 | 21.77905301 | 22.77455656 | 31.90463969 | 28.60013529 | 25.22053829 | 31.37230296 |
| ENSMUSG00000097707 | 2.633008804  | 0.350464057  | 5.878879992 | 0.015323566 | 0.999071534 | Gm26742       | Gm26742       |         | 0           | 0           | 1.077123525 | 0.277528426 | 0.327012808 | 0.363810808 | 0.323576467 | 0.552659619 | 5.106962581 | 2.483640651 |
| ENSMUSG00000084978 | 2.256568108  | 0.712866318  | 5.841349545 | 0.015653816 | 0.999071534 | Gm11655       | Gm11655       |         | 0.210540101 | 0.118580089 | 1.144443746 | 1.110113705 | 0.130805123 | 0.145524323 | 0.647152935 | 1.243484143 | 6.128355098 | 2.875794438 |
| ENSMUSG00000055072 | 2.466555221  | -0.251312322 | 5.828032577 | 0.015772754 | 0.999071534 | Gm9964        | Gm9964        |         | 0.210540101 | 0           | 0.673202203 | 0           | 0.261610246 | 0.509335131 | 0.323576467 | 0.759906976 | 1.964216377 | 2.091486864 |
| ENSMUSG00000083328 | 2.340918773  | -0.611189198 | 5.825283279 | 0.015797424 | 0.999071534 | Gm11826       | Gm11826       |         | 0.140360067 | 0.059290044 | 0.471241542 | 0.138764213 | 0.065402562 | 0.363810808 | 0.258861174 | 1.036236786 | 0.471411931 | 2.091486864 |
| ENSMUSG00000028176 | 2.411808935  | -0.190196174 | 5.817193051 | 0.015870252 | 0.999071534 | Lrrc7         | Lrrc7         | LRRC7   | 0.491260235 | 0.059290044 | 0.336601102 | 0.069382107 | 0.327012808 | 0.363810808 | 0.258861174 | 0.27632981  | 3.614158135 | 1.176461361 |
| ENSMUSG00000029379 | -1.26155262  | 3.567903947  | 5.812204052 | 0.015915335 | 0.999071534 | Cxcl3         | Cxcl3         | CXCL1   | 36.28307734 | 26.02832949 | 12.31960032 | 8.742145425 | 3.204725518 | 4.365729691 | 11.06631518 | 2.832380548 | 6.914041649 | 7.385562989 |
| ENSMUSG00000063632 | 1.546273824  | 0.516040318  | 5.811198115 | 0.015924441 | 0.999071534 | Sox11         | Sox11         | SOX11   | 1.052700503 | 0.355740266 | 0.875162864 | 0.416292639 | 0.784830739 | 2.110102684 | 1.553167044 | 0.759906976 | 2.907040239 | 1.895409971 |
| ENSMUSG00000044338 | 1.629633186  | 3.144095245  | 5.801223304 | 0.016015029 | 0.999071534 | Aphr          | Aphr          | APLNR   | 7.439083555 | 2.371601776 | 5.250977187 | 2.081463196 | 5.101399804 | 44.60320501 | 19.73816451 | 1.4507315   | 2.042785033 | 3.92153787  |
| ENSMUSG00000024610 | -0.959025556 | 8.872784272  | 5.774902734 | 0.01625662  | 0.999071534 | Cd74          | Cd74          | CD74    | 896.4797485 | 950.7158621 | 544.5532623 | 300.9795782 | 551.081984  | 656.5329834 | 110.2101448 | 365.5152556 | 140.323618  | 349.801178  |
| ENSMUSG00000058360 | 0.864738368  | 6.153409575  | 5.773666236 | 0.016268061 | 0.999071534 | Gm10040       | Gm10040       |         | 57.47744747 | 34.09177553 | 44.49866565 | 76.52846352 | 46.8282341  | 51.87942117 | 46.98330307 | 79.99747987 | 151.480367  | 84.31306421 |
| ENSMUSG00000022797 | 0.728588314  | 6.396484569  | 5.769157014 | 0.016309856 | 0.999071534 | Tfrc          | Tfrc          | TFRC    | 75.79443623 | 47.78777579 | 71.56139422 | 61.05625376 | 72.85845362 | 132.2816096 | 191.3631228 | 70.25685408 | 72.04745672 | 49.41137717 |
| ENSMUSG00000064343 | 1.722966088  | 1.31177891   | 5.767320202 | 0.016326913 | 0.999071534 | mt-Tq         | mt-Tq         |         | 1.333420637 | 1.067220799 | 2.01960661  | 0.277528426 | 1.111843547 | 0.9459081   | 1.29430587  | 3.45412262  | 8.721120716 | 1.437897219 |
| ENSMUSG00000000326 | 0.572885582  | 6.313799115  | 5.763778189 | 0.016359856 | 0.999071534 | Comt          | Comt          | COMT    | 66.67103186 | 78.91504911 | 63.95420932 | 53.0079294  | 69.91533835 | 80.32942632 | 101.214719  | 83.24435513 | 108.896156  | 73.26739921 |
| ENSMUSG00000024737 | -0.804754821 | 4.27849342   | 5.731183779 | 0.016666244 | 0.999071534 | Slc15a3       | Slc15a3       | SLC15A3 | 32.98461576 | 38.59781891 | 20.06142566 | 18.45564034 | 17.72409419 | 28.59552948 | 11.64875283 | 14.02373784 | 5.342668547 | 12.02604947 |
| ENSMUSG00000084799 | 1.347219472  | 1.056161536  | 5.709997055 | 0.016868568 | 0.999071534 | Gm11602       | Ino80dos      |         | 1.333420637 | 0.830060622 | 1.144443746 | 0.693821065 | 1.765869163 | 1.600767553 | 1.876743511 | 1.934308667 | 3.457020824 | 4.248332693 |
| ENSMUSG00000025743 | -0.631386208 | 6.787296095  | 5.70083289  | 0.016964108 | 0.999071534 | Sdc3          | Sdc3          | SDC3    | 120.2183975 | 186.2300295 | 149.8548105 | 112.3296305 | 128.7122412 | 131.7722745 | 51.5780889  | 112.3280676 | 53.34811681 | 79.08434705 |
| ENSMUSG00000053656 | 0.971581807  | 3.550049662  | 5.69254441  | 0.017037135 | 0.999071534 | Dancr         | Dancr         |         | 7.439083555 | 4.150303108 | 14.20456649 | 8.742145425 | 5.886230544 | 9.386318836 | 9.060141087 | 14.30006765 | 19.09218319 | 19.34625349 |

|                     |              |              |             |             |             |               |               |               |             |             |              |             |             |             |             |             |             |             |
|---------------------|--------------|--------------|-------------|-------------|-------------|---------------|---------------|---------------|-------------|-------------|--------------|-------------|-------------|-------------|-------------|-------------|-------------|-------------|
| ENSMUSG00000022751  | 0.680477052  | 4.266628858  | 5.655372039 | 0.017401983 | 0.999071534 | Nit2          | Nit2          | NIT2          | 16.91338808 | 13.87387039 | 12.72352164  | 17.41490874 | 15.17339429 | 15.93491337 | 30.35147264 | 24.45518815 | 22.70634132 | 17.64692042 |
| ENSMUSG000000095098 | -0.656572588 | 5.97733101   | 5.639420525 | 0.01756101  | 0.999071534 | Ccdc85b       | Ccdc85b       | CCDC85B       | 103.1646493 | 81.40523097 | 66.37773726  | 65.42732648 | 84.69631727 | 92.62623162 | 57.20831944 | 33.43590696 | 19.2493205  | 46.2087879  |
| ENSMUSG000000070504 | -1.972526843 | 3.314153439  | 5.636466081 | 0.017590629 | 0.999071534 | Fcrl6         | Fcrl6         | FCRL6         | 34.38821644 | 41.50303108 | 1.683005509  | 3.399723221 | 1.308051232 | 2.910486461 | 0.323576467 | 9.464295978 | 2.357059653 | 3.856178906 |
| ENSMUSG000000072258 | 0.877696646  | 3.422514661  | 5.631797872 | 0.017637533 | 0.999071534 | Taf1a         | Taf1a         | TAF1A         | 10.52700503 | 7.411255551 | 6.732022034  | 4.717983245 | 9.679579116 | 12.6606161  | 5.953807    | 14.23098519 | 13.98522061 | 18.30051006 |
| ENSMUSG000000025353 | 0.746817421  | 4.45207165   | 5.62269659  | 0.01772935  | 0.999071534 | Ormdl2        | Ormdl2        | ORMDL2        | 31.86173523 | 12.62877946 | 11.5790779   | 12.35001497 | 16.54684808 | 20.66445387 | 31.7752091  | 21.41556024 | 26.9490487  | 28.30043163 |
| ENSMUSG000000024924 | -0.990108945 | 3.452887275  | 5.622480463 | 0.017731536 | 0.999071534 | Vldlr         | Vldlr         | VLDLR         | 7.93034379  | 27.45129056 | 14.06992605  | 14.77838869 | 10.20279961 | 5.166113468 | 5.824376413 | 13.47107822 | 4.32127603  | 5.816947841 |
| ENSMUSG000000038528 | 2.439521034  | -0.504357789 | 5.621078714 | 0.017745723 | 0.999071534 | BC021785      | Mfsd4b5       | MFSD4B        | 0           | 0.118580089 | 0.471241542  | 0.138764213 | 0.196207685 | 0.363810808 | 0.129430587 | 0.483577167 | 1.571373102 | 2.0261279   |
| ENSMUSG000000022257 | -0.55625891  | 6.094785642  | 5.604980149 | 0.017909498 | 0.999071534 | Laptm4b       | Laptm4b       | LAPTM4B       | 87.72504193 | 96.16845203 | 60.52087809  | 86.45010476 | 90.90956062 | 84.9134425  | 63.22684173 | 51.60459194 | 28.75612777 | 46.99309548 |
| ENSMUSG000000087579 | 2.838490146  | -0.019926338 | 5.600173626 | 0.017958698 | 0.999071534 | 1500017E21Rik | 1500017E21Rik | 1500017E21Rik | 0.070180034 | 0           | 0.5385861763 | 0.138764213 | 0.39241537  | 0.072762162 | 0.129430587 | 0.207247357 | 5.106962581 | 1.111102397 |
| ENSMUSG000000074622 | -0.569148326 | 5.575386814  | 5.59732812  | 0.01798789  | 0.999071534 | Mafb          | Mafb          | MAFB          | 71.23273404 | 70.73302298 | 48.26859799  | 52.31410834 | 53.04147745 | 62.57545891 | 27.18042326 | 42.27846087 | 20.50641898 | 38.62714802 |
| ENSMUSG000000057762 | 2.083478278  | 1.532494728  | 5.589360248 | 0.018069895 | 0.999071534 | Gm6169        | Gm6169        | PLP2          | 0.280720134 | 0.474320355 | 0            | 1.873316877 | 2.87771271  | 2.110102684 | 1.423736457 | 7.944482025 | 8.01400282  | 0.71894861  |
| ENSMUSG000000043079 | -0.578795277 | 6.376740634  | 5.588205275 | 0.018081814 | 0.999071534 | Synpo         | Synpo         | SYNPO         | 102.8839292 | 134.2326605 | 84.48687653  | 92.69449435 | 102.6166191 | 118.7478476 | 53.71369359 | 49.0485412  | 38.97005293 | 73.79027093 |
| ENSMUSG000000026981 | -1.055710096 | 4.504514295  | 5.562516849 | 0.018349016 | 0.999071534 | Il1rn         | Il1rn         | IL1RN         | 45.47666174 | 70.55515284 | 22.08103227  | 10.96237283 | 10.66061754 | 26.33990247 | 11.13103048 | 16.51070612 | 5.892649132 | 14.1828953  |
| ENSMUSG000000031450 | 1.340870541  | 2.103072046  | 5.555147637 | 0.018426419 | 0.999071534 | Grk1          | Grk1          | GRK1          | 2.947561409 | 2.01586151  | 2.827449254  | 1.040731598 | 3.597140888 | 2.328389169 | 2.200319978 | 4.283112048 | 11.78529826 | 6.078383699 |
| ENSMUSG000000013415 | 0.852995814  | 3.789896895  | 5.547864423 | 0.018503249 | 0.999071534 | Igf2bp1       | Igf2bp1       | IGF2BP1       | 7.789983723 | 11.32439848 | 11.84835878  | 6.452535909 | 13.53833025 | 13.38823772 | 8.412988152 | 22.58996193 | 22.15636074 | 15.49007459 |
| ENSMUSG000000018651 | 0.596143171  | 4.479458207  | 5.547308413 | 0.018509128 | 0.999071534 | Tada2a        | Tada2a        | TADA2A        | 13.12366627 | 14.64464097 | 23.36011646  | 18.24749402 | 22.17146838 | 31.94258891 | 23.55636683 | 23.211704   | 21.60638015 | 29.2808161  |
| ENSMUSG000000086358 | 1.797760351  | -0.164929375 | 5.545064138 | 0.018532878 | 0.999071534 | Gm13270       | Gm13270       |               | 0.350900168 | 0.237160178 | 0.5385861763 | 0.138764213 | 0.523220493 | 0.654859454 | 0.647152935 | 1.105319238 | 1.728510412 | 1.437897219 |
| ENSMUSG000000033880 | -0.776340528 | 5.435650281  | 5.540846256 | 0.018577597 | 0.999071534 | Lgals3bp      | Lgals3bp      | LGALS3BP      | 62.53040989 | 85.79269426 | 48.47055865  | 41.90679236 | 45.25857262 | 76.54579392 | 32.16350086 | 24.17885834 | 12.49241616 | 19.60768935 |
| ENSMUSG000000028599 | -0.71150349  | 6.075721505  | 5.538475946 | 0.018602777 | 0.999071534 | Tnfrsf1b      | Tnfrsf1b      | TNFRSF1B      | 120.8500178 | 124.3312231 | 57.82806927  | 61.81945694 | 71.68120751 | 89.78850732 | 54.49027711 | 49.25578856 | 17.99222202 | 47.3198903  |
| ENSMUSG000000031939 | 0.735785775  | 5.844097681  | 5.535456785 | 0.0186349   | 0.999071534 | Taf1d         | Taf1d         | TAF1D         | 39.23063875 | 32.8466846  | 61.26140051  | 50.02449882 | 38.84912159 | 39.1460429  | 43.74753839 | 68.87520504 | 94.91093536 | 82.61373113 |
| ENSMUSG000000027115 | 0.739223169  | 4.095294867  | 5.53004216  | 0.018692655 | 0.999071534 | Kif18a        | Kif18a        | KIF18A        | 16.63266795 | 8.537766395 | 15.2143698   | 9.158438064 | 16.80845833 | 21.68312413 | 31.51634792 | 14.57639746 | 19.87786974 | 14.24825426 |
| ENSMUSG000000045545 | 2.017581792  | 0.4162873    | 5.506223295 | 0.018948921 | 0.999071534 | Krt14         | Krt14         | KRT14         | 0.771980369 | 0.237160178 | 0.875162864  | 0.624438959 | 0           | 1.746291877 | 0.388291761 | 1.865226215 | 4.16413872  | 0.784307574 |
| ENSMUSG000000006651 | -1.610980795 | 0.582417191  | 5.505319103 | 0.018958721 | 0.999071534 | Aplp1         | Aplp1         | APLP1         | 1.543960738 | 4.268883197 | 1.615685288  | 0.624438959 | 2.616102464 | 0.9459081   | 0.258861174 | 1.174401691 | 0.235705965 | 0.653589645 |
| ENSMUSG000000020644 | -0.701744902 | 4.769817853  | 5.505263788 | 0.01895932  | 0.999071534 | Id2           | Id2           | ID2           | 48.77512331 | 53.12387979 | 26.25488593  | 23.3123878  | 24.06814267 | 20.30064306 | 23.68579741 | 27.35665115 | 11.07818037 | 18.16979213 |
| ENSMUSG000000079470 | 1.024029597  | 2.239166415  | 5.482534822 | 0.019207387 | 0.999071534 | Utp14b        | Utp14b        | UTP14C        | 3.087921476 | 1.897281421 | 2.894769475  | 3.399723221 | 4.447374189 | 5.529924276 | 3.753487022 | 4.352194501 | 6.756904338 | 8.823460208 |
| ENSMUSG000000020241 | -0.845504261 | 7.561554255  | 5.476401712 | 0.019274897 | 0.999071534 | Col6a2        | Col6a2        | COL6A2        | 202.4693968 | 453.6281298 | 217.7135926  | 193.4373131 | 195.2920489 | 292.8677001 | 149.2334668 | 115.7821902 | 47.21976171 | 90.7836017  |
| ENSMUSG000000063018 | 0.912518918  | 2.914187497  | 5.473225504 | 0.019309955 | 0.999071534 | 2010204K13Rik | 2010204K13Rik |               | 6.526743119 | 3.913142931 | 4.375814322  | 5.550568524 | 6.344048475 | 6.257545891 | 13.9137881  | 6.562832977 | 6.756904338 | 12.87571601 |
| ENSMUSG000000050075 | -0.967765437 | 2.827568971  | 5.461111832 | 0.019444271 | 0.999071534 | Gpr171        | Gpr171        | GPR171        | 10.17610486 | 9.96072746  | 10.36731393  | 9.85225913  | 7.39048946  | 8.804221544 | 5.241938772 | 3.592287524 | 1.099961171 | 5.294076125 |
| ENSMUSG000000038319 | -0.982205985 | 2.857629922  | 5.460836116 | 0.019447339 | 0.999071534 | Kcnnh2        | Kcnnh2        | KCNH2         | 6.035482885 | 9.367827016 | 8.482347763  | 14.91715291 | 9.744981678 | 7.130691829 | 2.394465859 | 5.043019025 | 2.199922343 | 6.993409202 |
| ENSMUSG000000064339 | 1.324835147  | 10.53606183  | 5.448469195 | 0.019585481 | 0.999071534 | mt-Rnr2       | mt-Rnr2       |               | 620.3914965 | 502.6609965 | 900.2804412  | 1619.517131 | 588.9500672 | 462.2580122 | 503.5496986 | 1634.007246 | 4626.043844 | 1938.808323 |
| ENSMUSG000000064369 | 1.427982776  | 7.592385997  | 5.44124849  | 0.019666607 | 0.999071534 | mt-Te         | mt-Te         |               | 41.75711996 | 37.70846824 | 197.7194871  | 175.2592011 | 81.29538406 | 61.04745352 | 90.92498734 | 184.5883128 | 669.1692355 | 196.0768935 |
| ENSMUSG000000036594 | -0.900134241 | 7.120914068  | 5.431670717 | 0.019774752 | 0.999071534 | H2-Aa         | H2-Aa         | HLA-DQA1      | 235.7347327 | 286.4302045 | 190.5162236  | 90.40488483 | 144.5396611 | 193.4745875 | 28.15115266 | 112.7425623 | 49.96966464 | 106.861907  |
| ENSMUSG000000047793 | -1.226582745 | 1.824075297  | 5.424156739 | 0.019860024 | 0.999071534 | Sned1         | Sned1         | SNED1         | 4.000261912 | 5.217523908 | 8.953589305  | 3.954780073 | 2.550699902 | 2.764962138 | 0.711868228 | 1.174401691 | 2.278490998 | 2.875794438 |
| ENSMUSG000000005268 | 2.887066043  | 0.811660766  | 5.421516836 | 0.019890073 | 0.999071534 | Prlr          | Prlr          | PRLR          | 0.210540101 | 0.059290044 | 1.683005509  | 0           | 0           | 12.58785394 | 0.129430587 | 0.138164905 | 0.392843275 | 2.745076509 |
| ENSMUSG000000064354 | 1.351999804  | 13.79555509  | 5.415820976 | 0.019955067 | 0.999071534 | mt-Co2        | mt-Co2        | MT-CO2        | 4860.248043 | 3383.919994 | 13232.73179  | 13431.3351  | 6011.99967  | 4111.20765  | 4933.440968 | 16041.70535 | 42440.19472 | 21174.40909 |
| ENSMUSG000000025981 | 0.535847294  | 5.06844611   | 5.406121046 | 0.020066257 | 0.999071534 | Coq10b        | Coq10b        | COQ10B        | 30.45813456 | 26.32477792 | 34.53527304  | 19.14946141 | 31.8510475  | 41.0378591  | 49.6366301  | 38.96250315 | 29.85608894 | 31.89517468 |
| ENSMUSG000000029084 | -0.58483112  | 4.671664666  | 5.397315083 | 0.020167754 | 0.999071534 | Cd38          | Cd38          | CD38          | 38.59901845 | 28.16277109 | 32.17906532  | 30.80565531 | 28.25390661 | 26.33990247 | 23.16807507 | 19.82666384 | 9.035395336 | 22.15668897 |
| ENSMUSG000000068196 | 0.519059495  | 5.653892965  | 5.364129742 | 0.020555042 | 0.999071534 | Col8a1        | Col8a1        | COL8A1        | 38.45865838 | 48.61783641 | 48.73983953  | 37.60510175 | 41.00740612 | 85.20449114 | 72.4164134  | 46.00891329 | 46.74834978 | 40.13040421 |
| ENSMUSG000000026950 | -2.484649834 | -0.174796211 | 5.359354338 | 0.020611403 | 0.999071534 | Neb           | Neb           | NEB           | 3.228281543 | 1.007930755 | 2.356207712  | 0           | 0.065402562 | 0.291048646 | 0.064715293 | 0.207247357 | 0.235705965 | 0.261435858 |

|                    |              |              |             |             |             |          |          |         |             |             |             |             |             |             |             |             |             |             |
|--------------------|--------------|--------------|-------------|-------------|-------------|----------|----------|---------|-------------|-------------|-------------|-------------|-------------|-------------|-------------|-------------|-------------|-------------|
| ENSMUSG00000020561 | 0.650248838  | 5.256620459  | 5.357808745 | 0.020629679 | 0.999071534 | Twistnb  | Twistnb  | TWISTNB | 26.59823271 | 20.33648523 | 38.57448626 | 38.0907765  | 29.43115272 | 32.5246862  | 48.47175482 | 32.81416489 | 53.74096009 | 50.39176163 |
| ENSMUSG00000069917 | -1.053467259 | 6.827122877  | 5.343745575 | 0.020796742 | 0.999071534 | Hba-a2   | Hba-a2   | HBA1    | 125.2713599 | 412.8958693 | 70.41695048 | 116.2150285 | 72.66224593 | 40.67404829 | 83.09443683 | 134.5726173 | 38.81291562 | 54.83617122 |
| ENSMUSG00000052776 | -0.72005629  | 4.228329965  | 5.332277737 | 0.02093401  | 0.999071534 | Oas1a    | Oas1a    | OAS1    | 27.37021308 | 26.08761954 | 21.27318963 | 18.59440456 | 27.46907587 | 27.50409706 | 17.99085159 | 10.84594503 | 6.049786443 | 9.150255031 |
| ENSMUSG00000029309 | -0.571273317 | 6.945429525  | 5.331311018 | 0.020945624 | 0.999071534 | Sparc1l  | Sparc1l  | SPARCL1 | 102.8137491 | 166.4271547 | 169.0410733 | 170.8187463 | 152.0609557 | 145.3060366 | 85.10061093 | 74.60904859 | 70.00467169 | 113.7245982 |
| ENSMUSG00000056687 | 1.343843386  | 0.660265036  | 5.324727516 | 0.021024896 | 0.999071534 | Gm11696  | Gm11696  |         | 0.912340436 | 0.830060622 | 1.211763966 | 0.416292639 | 0.915635862 | 1.45524323  | 1.747312924 | 1.657978857 | 2.435628308 | 2.548999616 |
| ENSMUSG00000037437 | 2.137653095  | -0.253848275 | 5.313129222 | 0.021165307 | 0.999071534 | Adam32   | Adam32   | ADAM32  | 0.210540101 | 0.296450222 | 0.403921322 | 0           | 0.457817931 | 0.363810808 | 0.19414588  | 1.243484143 | 1.178529826 | 2.483640651 |
| ENSMUSG00000074731 | 2.177851149  | -0.28541663  | 5.301255601 | 0.021310058 | 0.999071534 | Zfp345   | Zfp345   |         | 0.140360067 | 0.652190488 | 0           | 0.416292639 | 0.065402562 | 0.654859454 | 0.517722348 | 0.552659619 | 1.492804447 | 2.156845829 |
| ENSMUSG00000094030 | 2.090026123  | 0.474471372  | 5.29233554  | 0.021419475 | 0.999071534 | Gm21833  | Gm21833  |         | 0           | 0.059290044 | 0.942483085 | 0.416292639 | 1.111843547 | 0.436572969 | 1.100159989 | 2.832380548 | 3.8498641   | 1.045743432 |
| ENSMUSG00000020640 | 0.616929266  | 5.053684128  | 5.289693414 | 0.021451996 | 0.999071534 | Itsn2    | Itsn2    | ITSN2   | 24.49283171 | 36.64124744 | 26.25488593 | 21.30030671 | 27.20746562 | 49.69655632 | 22.32677625 | 34.12673148 | 49.3411154  | 35.03240497 |
| ENSMUSG00000082321 | 3.148357227  | 0.84233802   | 5.28941869  | 0.021455381 | 0.999071534 | Gm14253  | Gm14253  |         | 0           | 0           | 0           | 0           | 1.765869163 | 2.764962138 | 5.177223478 | 5.802926001 | 0.942823861 | 0           |
| ENSMUSG00000085543 | 2.174848239  | 1.246149408  | 5.273973926 | 0.021646542 | 0.999071534 | Gm13568  | Gm13568  |         | 0           | 0.237160178 | 0.875162864 | 2.428373729 | 0.588623054 | 0.436572969 | 0.582437641 | 1.105319238 | 6.599767028 | 7.843075741 |
| ENSMUSG00000054675 | -0.800252302 | 5.02168993   | 5.267407484 | 0.021728349 | 0.999071534 | Tmem119  | Tmem119  | TMEM119 | 57.05636727 | 67.41278049 | 29.62089695 | 26.15705417 | 34.66335765 | 52.3887563  | 18.63800452 | 21.83005496 | 7.306884924 | 21.69917622 |
| ENSMUSG00000085829 | 1.190537563  | 1.696912626  | 5.267203142 | 0.0217309   | 0.999071534 | Gm4285   | Gm4285   |         | 1.614140771 | 1.719411288 | 3.164050356 | 1.665170557 | 1.700466601 | 1.964578361 | 2.718042326 | 3.730452429 | 6.206923753 | 5.294076125 |
| ENSMUSG00000025163 | -1.575500739 | 0.405576054  | 5.257530175 | 0.021852008 | 0.999071534 | Cd7      | Cd7      | CD7     | 0.701800335 | 1.897281421 | 3.635291898 | 1.80393477  | 1.111843547 | 0.509335131 | 0.647152935 | 0.967154334 | 0.15713731  | 0.588230681 |
| ENSMUSG00000034522 | -0.748367509 | 5.186631351  | 5.22634209  | 0.022247272 | 0.999071534 | Zfp395   | Zfp395   | ZNF395  | 39.02009865 | 87.33423541 | 30.22677893 | 31.98515112 | 48.92111607 | 25.68504302 | 20.25588686 | 46.35432556 | 13.98522061 | 25.03248341 |
| ENSMUSG00000040488 | -0.53984099  | 5.599366657  | 5.208645815 | 0.022474833 | 0.999071534 | Ltbp4    | Ltbp4    | LTBP4   | 53.82808573 | 77.55137808 | 47.39343512 | 66.60682229 | 51.21020573 | 58.79182651 | 25.49782563 | 33.57407186 | 34.33450228 | 40.58791696 |
| ENSMUSG00000064352 | 1.386355016  | 9.81618554   | 5.200761366 | 0.022576997 | 0.999071534 | mt-Ts1   | mt-Ts1   |         | 262.6136855 | 203.6613025 | 844.464844  | 873.5901036 | 361.4145554 | 237.422933  | 301.0555453 | 992.2312637 | 2858.877653 | 1229.075328 |
| ENSMUSG00000023132 | -1.42907799  | 1.259391644  | 5.188080303 | 0.022742324 | 0.999071534 | Gzma     | Gzma     | GZMA    | 5.263502516 | 4.091013064 | 2.692808814 | 3.191576901 | 1.831271725 | 1.600767553 | 2.006174098 | 1.4507315   | 0           | 1.045743432 |
| ENSMUSG00000097263 | 1.545543538  | 3.470036169  | 5.186377248 | 0.022764623 | 0.999071534 | Gm26804  | Gm26804  |         | 4.35116208  | 0.711480533 | 9.694111729 | 10.5460802  | 3.27012808  | 2.910486461 | 3.559341141 | 14.99089217 | 31.89887397 | 18.2351511  |
| ENSMUSG00000034330 | -0.672322867 | 4.94454317   | 5.184859432 | 0.022784515 | 0.999071534 | Plcg2    | Plcg2    | PLCG2   | 38.94991862 | 41.85877135 | 27.4666499  | 45.30651558 | 41.66143174 | 52.97085359 | 18.70271982 | 13.74740803 | 13.35667137 | 22.15668897 |
| ENSMUSG00000097345 | 2.369415617  | -0.498438077 | 5.170934878 | 0.022967852 | 0.999071534 | AA543186 | AA543186 |         | 0           | 0.237160178 | 0.538561763 | 0           | 0.196207685 | 0.218286485 | 0.582437641 | 0.483577167 | 1.492804447 | 1.764692042 |
| ENSMUSG00000027398 | -0.997848745 | 5.461864292  | 5.164314175 | 0.023055559 | 0.999071534 | Il1b     | Il1b     | IL1B    | 144.290149  | 93.91543034 | 24.5045602  | 18.66378666 | 27.0766605  | 38.70946993 | 32.7459385  | 18.16868498 | 22.15636074 | 31.89517468 |
| ENSMUSG00000029648 | -0.561289514 | 5.9970534    | 5.159611858 | 0.023118063 | 0.999071534 | Flt1     | Flt1     | FLT1    | 61.12680921 | 89.64654714 | 92.69994341 | 79.442512   | 70.56936396 | 39.87366451 | 37.92316198 | 64.17759827 | 42.50564241 | 60.45704217 |
| ENSMUSG00000039496 | 2.07662446   | -0.022220761 | 5.156235459 | 0.023163051 | 0.999071534 | Cdnf     | Cdnf     | CDNF    | 0.070180034 | 0.830060622 | 0.538561763 | 0           | 0.261610246 | 0.873145938 | 0.323576467 | 1.105319238 | 1.649941757 | 2.61435858  |
| ENSMUSG00000030680 | 0.763446199  | 3.591762291  | 5.146222172 | 0.023297006 | 0.999071534 | Pagr1a   | Pagr1a   | PAGR1   | 11.64988557 | 8.063446039 | 8.078426441 | 5.550568524 | 12.9497072  | 27.86790786 | 14.56094103 | 9.118883716 | 9.663944577 | 14.24825426 |
| ENSMUSG00000058558 | 0.882409222  | 6.771056121  | 5.13533943  | 0.023443503 | 0.999071534 | Rpl5     | Rpl5     | RPL5    | 61.61806945 | 55.25832139 | 120.7051551 | 85.40937316 | 73.5778818  | 58.71906435 | 109.7571377 | 92.98498092 | 254.8767171 | 114.9010596 |
| ENSMUSG00000027859 | 0.539384338  | 5.037395156  | 5.132280072 | 0.023484858 | 0.999071534 | Ngf      | Ngf      | NGF     | 27.44039311 | 19.98074497 | 31.64050356 | 24.83879414 | 34.72876021 | 33.25230782 | 45.04184426 | 40.55139956 | 33.23454111 | 33.00627707 |
| ENSMUSG00000000031 | -2.224879016 | 1.13810387   | 5.113898709 | 0.023734926 | 0.999071534 | H19      | H19      |         | 9.053224327 | 1.067220799 | 5.183656966 | 1.179495811 | 1.308051232 | 2.182864846 | 1.617882337 | 0.069082452 | 0           | 0           |
| ENSMUSG00000086533 | 2.120017742  | -0.279976438 | 5.092521903 | 0.024029224 | 0.999071534 | Gm16266  | Mypopos  |         | 0.350900168 | 0.296450222 | 0.134640441 | 0.069382107 | 0.523220493 | 0.363810808 | 0.064715293 | 1.519813953 | 1.807079067 | 1.503256184 |
| ENSMUSG00000092341 | 1.243102213  | 10.18705839  | 5.088072332 | 0.024090956 | 0.999071534 | Malat1   | Malat1   |         | 466.9779432 | 647.9216053 | 827.7021091 | 928.4019677 | 697.9761374 | 296.433046  | 230.4511601 | 1852.998621 | 2634.171299 | 2269.590042 |
| ENSMUSG00000056457 | 0.944336031  | 7.527869844  | 5.087013695 | 0.024105667 | 0.999071534 | Pr12c3   | Pr12c3   | PRL     | 111.4458933 | 115.3191364 | 166.1463038 | 154.3751871 | 103.7938653 | 44.74872934 | 227.4095413 | 351.5606002 | 276.5616659 | 206.5996868 |
| ENSMUSG00000037010 | -0.601728067 | 5.303808965  | 5.086673666 | 0.024110395 | 0.999071534 | Apln     | Apln     | APLN    | 33.12497583 | 79.62652964 | 37.76664361 | 33.99723221 | 63.1788745  | 31.36049162 | 29.44545853 | 36.33736996 | 24.59198905 | 28.82330335 |
| ENSMUSG00000044349 | 1.687690039  | 1.33676473   | 5.061560993 | 0.024462195 | 0.999071534 | Snhg11   | Snhg11   |         | 1.965040939 | 0.237160178 | 1.548365068 | 1.179495811 | 1.046440986 | 0.800383777 | 0.453007054 | 2.832380548 | 7.935434165 | 4.182973728 |
| ENSMUSG00000097875 | 2.14464014   | -0.502702626 | 5.056863748 | 0.024528587 | 0.999071534 | Gm26704  | Gm26704  |         | 0.070180034 | 0.118580089 | 0.269280881 | 0.555056852 | 0.065402562 | 0.582097292 | 0.19414588  | 0.552659619 | 1.257098482 | 1.895409971 |
| ENSMUSG00000025912 | 0.935404521  | 2.889200947  | 5.052110377 | 0.024595964 | 0.999071534 | Mybl1    | Mybl1    | MYBL1   | 3.719541778 | 5.158233863 | 5.654889509 | 2.497755836 | 9.156358623 | 10.62327558 | 9.124856381 | 5.595678644 | 12.17814154 | 7.843075741 |
| ENSMUSG00000020782 | 1.673975498  | 0.344305978  | 5.047533218 | 0.024661023 | 0.999071534 | Llg12    | Llg12    | LLGL2   | 0.280720134 | 0.474320355 | 0.605881983 | 0.693821065 | 0.784830739 | 2.910486461 | 0.517722348 | 1.243484143 | 3.221314859 | 0.457512752 |
| ENSMUSG00000038295 | 1.123540413  | 4.602544136  | 5.028854047 | 0.024928387 | 0.999071534 | Atg9b    | Atg9b    | ATG9B   | 12.21132584 | 6.225454663 | 11.84835878 | 20.19019301 | 28.31930917 | 9.895653967 | 7.959981098 | 48.42679913 | 37.7915231  | 47.64668512 |
| ENSMUSG00000056328 | -1.608930868 | 1.374694657  | 5.027191972 | 0.024952323 | 0.999071534 | Myh1     | Myh1     | MYH1    | 5.54422265  | 0.474320355 | 10.43463415 | 1.248877918 | 1.569661478 | 0.9459081   | 0.647152935 | 1.105319238 | 0.864255206 | 2.222204793 |
| ENSMUSG00000033981 | 2.319284046  | 0.046267776  | 5.006189003 | 0.025256849 | 0.999071534 | Gria2    | Gria2    | GRIA2   | 0.561440268 | 0.118580089 | 0.403921322 | 0.485674746 | 0           | 0.218286485 | 0.064715293 | 0.967154334 | 2.435628308 | 3.267948225 |

|                     |              |              |             |             |             |               |               |            |             |             |             |             |             |             |             |             |             |             |
|---------------------|--------------|--------------|-------------|-------------|-------------|---------------|---------------|------------|-------------|-------------|-------------|-------------|-------------|-------------|-------------|-------------|-------------|-------------|
| ENSMUSG00000020212  | 0.681708888  | 3.809063451  | 5.004592209 | 0.025280158 | 0.999071534 | Mdm1          | Mdm1          | MDM1       | 14.10618674 | 8.893506661 | 9.559471289 | 9.227820171 | 13.7999405  | 17.68120525 | 17.14955277 | 11.12227484 | 19.72073243 | 15.62079252 |
| ENSMUSG00000098090  | 0.873784751  | 4.399718601  | 5.001427084 | 0.025326428 | 0.999071534 | 2700099C18Rik | 2700099C18Rik |            | 16.35194782 | 7.944865951 | 26.65880726 | 12.83568971 | 13.08051232 | 13.53376204 | 17.27898336 | 23.28078646 | 42.89848568 | 26.07822684 |
| ENSMUSG00000089647  | 1.373611872  | 1.294970792  | 4.991428899 | 0.025473166 | 0.999071534 | Gm2245        | Gm2245        |            | 0.701800335 | 1.363671021 | 1.211763966 | 1.942698983 | 1.504258917 | 1.018670261 | 2.329750565 | 2.625133191 | 6.756904338 | 2.287563758 |
| ENSMUSG00000097868  | 1.246065142  | 2.134426449  | 4.986018243 | 0.025552943 | 0.999071534 | A330069E16Rik | A330069E16Rik |            | 2.666841275 | 1.778701332 | 3.837252559 | 3.607869541 | 1.177246109 | 3.638108076 | 2.78275762  | 3.799534882 | 12.41384751 | 4.248332693 |
| ENSMUSG00000070315  | 1.092520261  | 2.550458726  | 4.965736679 | 0.0258543   | 0.999071534 | 4930581F22Rik | 4930581F22Rik |            | 4.491522147 | 2.786632087 | 3.366011017 | 4.371072713 | 3.989556257 | 3.056010784 | 3.753487022 | 6.908245239 | 13.90665195 | 7.385562989 |
| ENSMUSG00000080709  | 1.457451242  | 0.721183109  | 4.963615861 | 0.025886025 | 0.999071534 | Gm14324       | Gm14324       |            | 0.350900168 | 0.5336104   | 1.615685288 | 0.693821065 | 1.046440986 | 1.746291877 | 1.48845175  | 1.174401691 | 4.085570065 | 1.830051006 |
| ENSMUSG00000027080  | 0.592343445  | 4.821815331  | 4.961241067 | 0.025921597 | 0.999071534 | Med19         | Med19         | MED19      | 21.1241901  | 19.20997439 | 24.36991976 | 24.70002993 | 26.94585538 | 26.41266463 | 26.7921315  | 27.90931077 | 41.6413872  | 35.48991773 |
| ENSMUSG00000091227  | 1.840086928  | 1.563368411  | 4.944784224 | 0.026169505 | 0.999071534 | Gm3755        | Gm3755        |            | 0.842160403 | 0.474320355 | 1.750325729 | 2.081463196 | 1.308051232 | 1.018670261 | 0.453007054 | 0.828989429 | 13.8280833  | 2.61435858  |
| ENSMUSG00000032555  | 0.556715056  | 6.3529333    | 4.943785637 | 0.026184627 | 0.999071534 | Topbp1        | Topbp1        | TOPBP1     | 88.7075624  | 57.68921321 | 70.55159092 | 50.92646621 | 76.71720475 | 169.3175499 | 104.3857684 | 61.34521773 | 75.74018351 | 72.48309164 |
| ENSMUSG00000025270  | -1.543224699 | 0.941192178  | 4.935593884 | 0.026309021 | 0.999071534 | Alas2         | Alas2         | ALAS2      | 2.526481208 | 5.988294485 | 1.750325729 | 1.248877918 | 2.289089656 | 0.9459081   | 1.553167044 | 1.381649048 | 0           | 0.588230681 |
| ENSMUSG00000029267  | 0.529905453  | 5.243676494  | 4.925141695 | 0.026468631 | 0.999071534 | Mtf2          | Mtf2          | MTF2       | 29.33525402 | 28.5778014  | 36.0836381  | 34.13599642 | 31.8510475  | 37.83632399 | 39.86462078 | 40.4823171  | 51.77674371 | 39.80360938 |
| ENSMUSG00000044786  | -0.613412104 | 5.351786515  | 4.91809381  | 0.026576825 | 0.999071534 | Zfp36         | Zfp36         | ZFP36      | 78.4612775  | 59.17146432 | 53.38493473 | 24.63064782 | 42.11924967 | 41.83824288 | 23.42693624 | 40.89681182 | 22.94204729 | 27.97363681 |
| ENSMUSG00000091243  | 1.919863503  | -0.357198928 | 4.915460127 | 0.026617373 | 0.999071534 | VgI3          | VgI3          | VGIL3      | 0.070180034 | 0.237160178 | 0.336601102 | 0.20814632  | 0.523220493 | 1.164194584 | 2.459181152 | 0.621742072 | 0.15713731  | 0.71894861  |
| ENSMUSG00000090353  | 1.643089426  | 1.038271466  | 4.911529638 | 0.026678006 | 0.999071534 | Gm17555       | Gm17555       |            | 0.070180034 | 0.889350666 | 1.346404407 | 1.734552664 | 0.784830739 | 1.236956746 | 0.711868228 | 2.694215643 | 5.892649132 | 2.61435588  |
| ENSMUSG00000083863  | 1.367833371  | 3.421100195  | 4.910021164 | 0.026701314 | 0.999071534 | Gm13341       | Gm13341       |            | 1.122880537 | 4.861783641 | 6.732022034 | 12.62754339 | 4.774386997 | 3.34705943  | 5.047792891 | 17.89235517 | 29.2257397  | 11.56853672 |
| ENSMUSG00000021880  | -1.26565259  | 1.083824236  | 4.897055121 | 0.026902535 | 0.999071534 | Rnase6        | Rnase6        | RNASE6     | 3.579181711 | 2.075151554 | 2.692808814 | 3.885397967 | 2.223687094 | 1.746291877 | 1.48845175  | 0.345412262 | 0.392843275 | 1.830051006 |
| ENSMUSG00000018428  | 0.483943009  | 5.446652751  | 4.877457125 | 0.027209676 | 0.999071534 | Akap1         | Akap1         | AKAP1      | 39.16045872 | 49.21073686 | 29.14965541 | 27.47531419 | 44.21213164 | 58.57354003 | 53.00182536 | 46.97606763 | 39.91287679 | 47.58132616 |
| ENSMUSG00000032735  | -1.618211696 | 0.309518533  | 4.866258872 | 0.027386811 | 0.999071534 | Ablm3         | Ablm3         | ABLIM3     | 1.052700503 | 0.948640711 | 1.95228639  | 2.081463196 | 2.550699902 | 0.727621615 | 0.323576467 | 0.898071881 | 0           | 0.71894861  |
| ENSMUSG00000032827  | 1.417205568  | 0.665905487  | 4.855575938 | 0.027556912 | 0.999071534 | Ppp1r9a       | Ppp1r9a       | PPP1R9A    | 0.421080201 | 0.592900444 | 0.673202203 | 0.832585279 | 1.63506404  | 2.473913492 | 1.29430587  | 1.174401691 | 3.69272679  | 1.372538255 |
| ENSMUSG00000086199  | 2.731504984  | -0.928569782 | 4.830922226 | 0.027953674 | 0.999071534 | 8430403D17Rik | Bcas3os1      |            | 0           | 0           | 0           | 0.138764213 | 0.39241537  | 0.363810808 | 0.064715293 | 0.414494714 | 1.257098482 | 1.176461361 |
| ENSMUSG00000073758  | 1.794387217  | 0.081615617  | 4.8292657   | 0.027980545 | 0.999071534 | Sh3d21        | Sh3d21        | SH3D21     | 0.070180034 | 0.711480533 | 0.807842644 | 0.138764213 | 0.457817931 | 1.309718907 | 0.647152935 | 1.243484143 | 2.828471584 | 0.71894861  |
| ENSMUSG00000045294  | 0.56700204   | 5.716168371  | 4.81332311  | 0.028240536 | 0.999071534 | Insig1        | Insig1        | INSIG1     | 51.86304479 | 22.8266671  | 40.19017154 | 49.19191354 | 55.13435943 | 67.95985886 | 67.23918993 | 43.86735727 | 64.66200315 | 55.88191465 |
| ENSMUSG00000083750  | -1.886936472 | -0.348974748 | 4.80245928  | 0.028419142 | 0.999071534 | Gm14108       | Gm14108       |            | 1.824680872 | 0.355740266 | 1.346404407 | 1.179495811 | 0.588623054 | 0.436572969 | 0.258861174 | 0.138164905 | 0           | 0.522871716 |
| ENSMUSG00000033831  | 3.97363833   | 1.326752937  | 4.779865054 | 0.028794377 | 0.999071534 | Fgb           | Fgb           | FGB        | 0           | 0           | 1.413724627 | 0           | 0           | 25.97609166 | 0.129430587 | 0           | 0           | 0.196076894 |
| ENSMUSG00000020801  | 0.645813396  | 4.422175565  | 4.779271202 | 0.028804309 | 0.999071534 | Med31         | Med31         | MED31      | 20.63292986 | 16.54192239 | 15.61829112 | 16.65170557 | 16.87386089 | 15.78938905 | 38.18202315 | 21.07014798 | 27.2632332  | 19.73840728 |
| ENSMUSG00000094248  | 0.791311025  | 6.119517815  | 4.777923224 | 0.028826866 | 0.999071534 | Hist1h2ao     | Hist1h2ao     |            | 46.66972231 | 14.70393101 | 67.32022034 | 75.2102035  | 57.68505933 | 75.67264798 | 70.53966989 | 59.34182661 | 120.1314736 | 83.98626939 |
| ENSMUSG00000091383  | -0.932810818 | 3.314882047  | 4.776347334 | 0.02885326  | 0.999071534 | Hist1h2al     | Hist1h2al     | HIST2H2A4A | 18.10644865 | 11.14652835 | 11.78103856 | 13.32136446 | 12.55729183 | 4.80230266  | 3.559341141 | 10.63869767 | 2.042785033 | 11.69925465 |
| ENSMUSG00000029449  | -1.180999191 | 1.53886101   | 4.762214394 | 0.029091098 | 0.999071534 | Rhof          | Rhof          | RHOF       | 8.491784059 | 4.861783641 | 1.88496617  | 2.983430582 | 1.831271725 | 2.619437815 | 1.812028217 | 1.588896405 | 1.257098482 | 1.045743432 |
| ENSMUSG00000083084  | 1.370584091  | 3.540534783  | 4.760776532 | 0.02911541  | 0.999071534 | Gm14667       | Gm14667       |            | 2.596661241 | 2.371601776 | 13.19476319 | 11.23990126 | 3.400933203 | 4.656778337 | 4.659501131 | 11.12227484 | 35.90587538 | 16.07830527 |
| ENSMUSG00000062545  | -1.7160239   | 1.075878636  | 4.750148845 | 0.02929576  | 0.999071534 | Tlr12         | Tlr12         |            | 3.649361744 | 4.98036373  | 1.346404407 | 3.399723221 | 2.223687094 | 3.856394561 | 0.19414588  | 0.552659619 | 0           | 0.457512752 |
| ENSMUSG00000020393  | -0.458286858 | 5.581268106  | 4.729721674 | 0.029645682 | 0.999071534 | Kremen1       | Kremen1       | KREMEN1    | 49.47692365 | 73.6975252  | 59.37643434 | 48.35932826 | 56.3770081  | 55.88134005 | 36.6935714  | 38.20259617 | 33.0774038  | 32.61412329 |
| ENSMUSG00000081807  | 2.278203771  | -0.02344595  | 4.726186375 | 0.029706683 | 0.999071534 | Gm14849       | Gm14849       |            | 0.210540101 | 0.118580089 | 0.538561763 | 0.416292639 | 0.261610246 | 0.145524323 | 0           | 0.828989429 | 3.457020824 | 1.960768935 |
| ENSMUSG00000038967  | -0.936255443 | 2.246364043  | 4.722599964 | 0.0297687   | 0.999071534 | Pdk2          | Pdk2          | PKD2       | 6.035482885 | 7.292675462 | 4.779735644 | 4.162926393 | 9.352566308 | 3.274297269 | 2.394465859 | 3.17779281  | 1.492804447 | 5.097999231 |
| ENSMUSG00000019194  | -0.853039568 | 2.835764152  | 4.713448642 | 0.029927558 | 0.999071534 | Scn1b         | Scn1b         | SCN1B      | 12.07096577 | 14.76322106 | 6.664701814 | 7.354503294 | 6.082438228 | 8.367648575 | 3.882917609 | 4.835771668 | 2.828471584 | 4.967281302 |
| ENSMUSG00000003363  | -0.559648339 | 6.113186224  | 4.710659602 | 0.029976148 | 0.999071534 | Pld3          | Pld3          | PLD3       | 59.09158824 | 113.0661147 | 78.0914556  | 93.45769752 | 82.47263017 | 61.19297784 | 41.15892665 | 82.41536571 | 35.59160076 | 50.84927438 |
| ENSMUSG00000034845  | -0.51135202  | 5.748599128  | 4.709605796 | 0.029994529 | 0.999071534 | Plvap         | Plvap         | PLVAP      | 56.77564714 | 80.69375044 | 66.31041704 | 62.44389589 | 60.95518741 | 64.90384808 | 49.50719951 | 49.80844818 | 20.34928167 | 35.81671255 |
| ENSMUSG00000000385  | 3.138408637  | -0.098731219 | 4.705072286 | 0.030073737 | 0.999071534 | Tmprss2       | Tmprss2       | TMPRSS2    | 0           | 0           | 0.538561763 | 0           | 0.261610246 | 6.403070214 | 0.064715293 | 0.069082452 | 0           | 1.503256184 |
| ENSMUSG00000019039  | 0.614202771  | 4.753974866  | 4.704607909 | 0.030081863 | 0.999071534 | Dalrd3        | Dalrd3        | DALRD3     | 30.24759446 | 19.92145492 | 20.66730764 | 15.26406344 | 24.72216828 | 20.30064306 | 25.23896446 | 33.78131922 | 31.89887397 | 41.4375835  |
| ENSMUSG000000052374 | -3.112513528 | -0.400575619 | 4.694754355 | 0.030254823 | 0.999071534 | Actn2         | Actn2         | ACTN2      | 4.56170218  | 0.177870133 | 1.144443746 | 0           | 0           | 0.145524323 | 0.064715293 | 0           | 0           | 0.392153787 |

|                    |              |              |             |             |             |               |               |          |             |             |             |             |             |             |             |             |             |             |
|--------------------|--------------|--------------|-------------|-------------|-------------|---------------|---------------|----------|-------------|-------------|-------------|-------------|-------------|-------------|-------------|-------------|-------------|-------------|
| ENSMUSG00000022218 | -1.19662654  | 1.203031504  | 4.683965949 | 0.030445382 | 0.999071534 | Tgm1          | Tgm1          | TGM1     | 4.140621979 | 4.091013064 | 3.567971678 | 1.387642131 | 2.550699902 | 1.673529715 | 1.29430587  | 2.210638477 | 0.707117896 | 0.522871716 |
| ENSMUSG00000038375 | -0.573833144 | 5.742458196  | 4.679274813 | 0.030528633 | 0.999071534 | Trp53inp2     | Trp53inp2     | TP53INP2 | 45.12576157 | 76.06912697 | 55.40454134 | 89.91921009 | 62.78645913 | 46.20397257 | 25.04481858 | 53.4007357  | 31.11318742 | 51.82965885 |
| ENSMUSG00000096991 | 1.646382732  | -0.069023235 | 4.666336263 | 0.030759479 | 0.999071534 | Gm26789       | Gm26789       |          | 0.350900168 | 0.177870133 | 0.269280881 | 0.555056852 | 0.719428178 | 0.873145938 | 0.711868228 | 0.621742072 | 1.571373102 | 2.156845829 |
| ENSMUSG00000071516 | -3.361110835 | 0.8122906    | 4.665841897 | 0.030768335 | 0.999071534 | Hist1h2ai     | Hist1h2ai     |          | 4.35116208  | 0           | 5.520258068 | 5.203657991 | 0           | 0           | 1.359021163 | 0           | 0           | 0           |
| ENSMUSG00000023067 | -0.7742803   | 5.125621315  | 4.659385266 | 0.030884247 | 0.999071534 | Cdkn1a        | Cdkn1a        | CDKN1A   | 48.56458321 | 93.91543034 | 31.4385429  | 20.81463196 | 35.12117558 | 23.86598898 | 15.66110102 | 42.76203803 | 16.81369219 | 24.37889376 |
| ENSMUSG00000001119 | -0.626146441 | 8.945720266  | 4.658510553 | 0.030899985 | 0.999071534 | Col6a1        | Col6a1        | COL6A1   | 449.9943751 | 987.5349796 | 556.3343009 | 523.9736687 | 593.2666362 | 524.9062332 | 280.7349431 | 482.2646002 | 251.8911082 | 363.3304837 |
| ENSMUSG00000020884 | 1.856283097  | -0.245664865 | 4.643921203 | 0.031163719 | 0.999071534 | Asgf1         | Asgf1         | ASGR1    | 0.070180034 | 0.296450222 | 0.134640441 | 0.624438959 | 0.457817931 | 0.218286485 | 0.647152935 | 1.381649048 | 1.178529826 | 1.830051006 |
| ENSMUSG00000030849 | 1.346424711  | 1.278932199  | 4.642288992 | 0.03119337  | 0.999071534 | Fgfr2         | Fgfr2         | FGFR2    | 1.122880537 | 1.304380977 | 1.817645949 | 0.901967385 | 1.569661478 | 11.42365936 | 1.423736457 | 1.934308667 | 1.649941757 | 1.176461361 |
| ENSMUSG00000021217 | 1.356537273  | 0.632462477  | 4.629637735 | 0.031424198 | 0.999071534 | Tshz3         | Tshz3         | TSHZ3    | 0.912340436 | 1.126510844 | 1.211763966 | 0.277528426 | 0.654025616 | 2.40115133  | 0.906014109 | 2.210638477 | 2.907040239 | 1.30717929  |
| ENSMUSG00000024397 | -0.501760983 | 5.636144056  | 4.620393308 | 0.031593993 | 0.999071534 | Aif1          | Aif1          | AIF1     | 79.44379797 | 45.5347541  | 64.35813065 | 57.30962001 | 55.39596967 | 64.39451295 | 37.92316198 | 27.21848624 | 27.97044121 | 46.2087879  |
| ENSMUSG00000053101 | -1.268559695 | 2.662505434  | 4.612514675 | 0.031739457 | 0.999071534 | Gpr141        | Gpr141        | GPRI41   | 14.03600671 | 12.45090933 | 6.193460271 | 6.313771696 | 6.671061283 | 9.677367482 | 3.300479967 | 3.799534882 | 0.078568655 | 2.352922722 |
| ENSMUSG00000026134 | 0.53856947   | 4.924697094  | 4.612367607 | 0.031742179 | 0.999071534 | Prim2         | Prim2         | PRIM2    | 22.03653053 | 22.94524719 | 22.01371205 | 30.04245214 | 30.67380139 | 43.73005907 | 51.18979714 | 23.28078646 | 26.55620542 | 30.32655953 |
| ENSMUSG00000021815 | 1.199508877  | 2.034919162  | 4.607952594 | 0.031824007 | 0.999071534 | Mss51         | Mss51         | MSS51    | 1.824680872 | 1.837991377 | 2.760129034 | 2.22022741  | 3.924153696 | 1.600767553 | 2.006174098 | 4.766689215 | 8.642552061 | 8.039152634 |
| ENSMUSG00000031949 | 0.876751979  | 2.224522777  | 4.601156869 | 0.031950389 | 0.999071534 | Adat1         | Adat1         | ADAT1    | 2.947561409 | 3.49811262  | 4.645095204 | 2.428373729 | 3.139322957 | 8.222124252 | 6.406814054 | 3.45412262  | 5.735511822 | 4.836563373 |
| ENSMUSG00000017550 | 0.823070446  | 3.427400089  | 4.598401004 | 0.03200179  | 0.999071534 | Atad5         | Atad5         | ATAD5    | 11.01826527 | 11.20581839 | 4.173853661 | 4.648601139 | 9.156358623 | 23.50217817 | 15.9199622  | 6.35558562  | 9.585375922 | 12.48356222 |
| ENSMUSG00000021990 | -0.562283979 | 4.903880706  | 4.596093293 | 0.032044899 | 0.999071534 | Spata13       | Spata13       | SPATA13  | 45.89774194 | 42.27380166 | 39.78625022 | 27.19778577 | 30.01977577 | 45.84016176 | 17.27898336 | 21.27739534 | 14.77090716 | 21.89525311 |
| ENSMUSG00000060012 | -1.383717707 | 2.275428684  | 4.596079467 | 0.032045157 | 0.999071534 | Kif13b        | Kif13b        | KIF13B   | 10.94808523 | 14.76322106 | 0.942483085 | 3.885397967 | 5.035997243 | 5.675448599 | 2.265035272 | 3.730452429 | 0.31427462  | 1.437897219 |
| ENSMUSG00000043467 | 0.757782301  | 3.768709609  | 4.591170401 | 0.032137062 | 0.999071534 | Zbtb37        | Zbtb37        | ZBTB37   | 11.7200656  | 9.249246928 | 13.46404407 | 8.325852786 | 9.41796887  | 10.84156207 | 8.73656462  | 16.85611838 | 22.23492939 | 19.80376624 |
| ENSMUSG00000079092 | 0.870750715  | 8.160837728  | 4.585605468 | 0.032241578 | 0.999071534 | Pr12c2        | Pr12c2        | PRL      | 272.5792503 | 197.1393977 | 176.4462975 | 154.5833334 | 255.5932107 | 86.87802086 | 459.0902919 | 616.4227227 | 264.3835244 | 301.5009033 |
| ENSMUSG00000055216 | 1.559080212  | 1.296969566  | 4.576412997 | 0.032415002 | 0.999071534 | 9430025C20Rik | 9430025C20Rik |          | 1.122880537 | 0.355740266 | 1.615685288 | 1.665170557 | 1.373453794 | 0.363810808 | 0.647152935 | 3.592287524 | 5.264099892 | 5.882306805 |
| ENSMUSG00000036446 | 0.953819821  | 4.467187253  | 4.573760612 | 0.032465223 | 0.999071534 | Lum           | Lum           | LUM      | 17.19410822 | 21.10725581 | 15.75293156 | 12.48877918 | 11.31464316 | 30.99668081 | 77.59363688 | 10.98410993 | 8.092571475 | 17.18940766 |
| ENSMUSG00000048489 | -0.940649882 | 3.983976952  | 4.571986073 | 0.032498867 | 0.999071534 | 8430408G22Rik | 8430408G22Rik | C10orf10 | 35.44091694 | 17.96488346 | 30.83266092 | 14.22333184 | 8.960150939 | 13.97033501 | 21.09718567 | 4.075864691 | 4.00700141  | 10.58815225 |
| ENSMUSG00000027932 | 1.170381283  | 1.275570923  | 4.548066521 | 0.032955941 | 0.999071534 | Slc27a3       | Slc27a3       | SLC27A3  | 2.526481208 | 0.948640711 | 1.279084186 | 1.248877918 | 1.373453794 | 1.746291877 | 1.747312924 | 2.763298096 | 4.242707375 | 4.248332693 |
| ENSMUSG00000046269 | -1.047550978 | 1.768771379  | 4.545065162 | 0.033013766 | 0.999071534 | Usp27x        | Usp27x        | USP27X   | 3.298461576 | 4.861783641 | 3.837252559 | 5.134275885 | 5.690022859 | 2.910486461 | 1.100159989 | 3.868617334 | 1.021392516 | 1.568615148 |
| ENSMUSG00000080316 | 0.603416032  | 4.399905546  | 4.542704355 | 0.033059324 | 0.999071534 | 4930546H06Rik | Spaca6        | SPACA6   | 14.03600671 | 17.13482283 | 23.36011646 | 14.08456763 | 17.92030188 | 18.04501606 | 20.25588686 | 29.15279491 | 18.62077126 | 34.70561015 |
| ENSMUSG00000020216 | -2.422279476 | -0.891659567 | 4.538377703 | 0.033142988 | 0.999071534 | Jsrp1         | Jsrp1         | JSRP1    | 1.684320805 | 0.118580089 | 1.346404407 | 0.346910533 | 0.065402562 | 0.072762162 | 0.129430587 | 0.207247357 | 0.15713731  | 0           |
| ENSMUSG00000058258 | 0.884703584  | 5.809511693  | 4.524729715 | 0.033408352 | 0.999071534 | Idi1          | Idi1          | IDI1     | 64.35509076 | 22.41163679 | 31.50586312 | 48.15118194 | 37.34486267 | 117.0015557 | 137.4552834 | 13.88557293 | 44.6269961  | 50.97999231 |
| ENSMUSG00000026009 | -1.235767215 | 1.681342332  | 4.516057806 | 0.033578117 | 0.999071534 | Icos          | Icos          | ICOS     | 7.71980369  | 6.699775018 | 3.90457278  | 3.122194795 | 0.981038424 | 2.110102684 | 0.647152935 | 2.694215643 | 1.021392516 | 2.418281687 |
| ENSMUSG00000078880 | 2.560816685  | 0.16692813   | 4.515466983 | 0.033589715 | 0.999071534 | Gm14308       | Gm14308       | ZNF788   | 0.210540101 | 0.415030311 | 0           | 0.555056852 | 0.327012808 | 0           | 0           | 3.315957715 | 3.378452169 | 0.980384468 |
| ENSMUSG00000097667 | 1.508303684  | 1.033715764  | 4.515002144 | 0.033598844 | 0.999071534 | Gm26764       | Gm26764       |          | 1.052700503 | 0.237160178 | 1.481044848 | 1.457024238 | 0.981038424 | 0.509335131 | 1.229590576 | 2.141556024 | 5.735511822 | 3.071871332 |
| ENSMUSG00000032661 | -0.848419999 | 2.898292611  | 4.501705228 | 0.033861071 | 0.999071534 | Oas3          | Oas3          | OAS3     | 12.63240604 | 11.20581839 | 5.85685917  | 8.256470679 | 11.11843547 | 10.84156207 | 2.912188207 | 4.006782239 | 3.064177549 | 5.620870947 |
| ENSMUSG00000058927 | 0.604150273  | 6.132980959  | 4.500553691 | 0.03388388  | 0.999071534 | Gm10053       | Gm10053       | CYC5     | 50.24890402 | 33.9139054  | 68.59930453 | 66.7455865  | 68.08406662 | 83.9675344  | 142.1794998 | 53.95339532 | 61.36211963 | 68.56155377 |
| ENSMUSG00000089789 | 1.60225317   | 0.862989435  | 4.498595713 | 0.033922701 | 0.999071534 | Rdh1          | Rdh1          | RDH16    | 0.280720134 | 1.007930755 | 1.750325729 | 0.138764213 | 1.24264867  | 0.873145938 | 0.776583522 | 1.519813953 | 4.714119306 | 3.660102012 |
| ENSMUSG00000030088 | -1.229835062 | 1.091783016  | 4.494166425 | 0.034010691 | 0.999071534 | Aldh1l1       | Aldh1l1       | ALDH1L1  | 3.649361744 | 1.541541155 | 3.029409915 | 4.648601139 | 1.504258917 | 1.746291877 | 1.553167044 | 1.174401691 | 0.235705965 | 1.241820326 |
| ENSMUSG00000026011 | -1.519374008 | 1.523335478  | 4.493001825 | 0.034033866 | 0.999071534 | Ctla4         | Ctla4         | CTLA4    | 7.368903522 | 10.25717768 | 2.625488593 | 0.555056852 | 0.457817931 | 1.746291877 | 0.776583522 | 1.865226215 | 1.335667137 | 1.045743432 |
| ENSMUSG00000021928 | 0.765765222  | 3.214484626  | 4.491637874 | 0.034061029 | 0.999071534 | Ebpl          | Ebpl          | EBPL     | 6.667103186 | 5.395394041 | 7.068623136 | 7.701413827 | 8.306125323 | 7.203453991 | 10.16030108 | 11.12227484 | 14.61376985 | 10.39207536 |
| ENSMUSG00000028187 | 0.473159942  | 5.325577939  | 4.490886646 | 0.034076    | 0.999071534 | Rpf1          | Rpf1          | RPF1     | 35.93217717 | 30.712243   | 39.65160978 | 30.59750899 | 37.08325242 | 47.51369147 | 57.33775002 | 31.84701055 | 42.58421106 | 43.98658311 |
| ENSMUSG00000093565 | 1.080223072  | 2.187866593  | 4.488781457 | 0.034117988 | 0.999071534 | 2610019E17Rik | Rab26os       |          | 3.298461576 | 1.48225111  | 5.722218729 | 2.01208109  | 2.289089656 | 2.837724299 | 3.947632902 | 4.62852431  | 7.542590889 | 8.888819173 |
| ENSMUSG00000021775 | 0.509295012  | 6.004113816  | 4.477456066 | 0.034344806 | 0.999071534 | Nr1d2         | Nr1d2         | NR1D2    | 45.75738187 | 58.3414037  | 53.78885605 | 74.72452875 | 39.63395233 | 83.53096143 | 88.65995207 | 80.48105704 | 56.33372571 | 55.81655569 |

|                     |              |             |             |             |             |           |           |            |             |             |             |             |             |             |             |             |             |             |
|---------------------|--------------|-------------|-------------|-------------|-------------|-----------|-----------|------------|-------------|-------------|-------------|-------------|-------------|-------------|-------------|-------------|-------------|-------------|
| ENSMUSG00000000759  | 0.443728286  | 5.413003658 | 4.47131368  | 0.034468481 | 0.999071534 | Tubgcp3   | Tubgcp3   | TUBGCP3    | 42.52910033 | 34.32893571 | 36.28559876 | 30.11183424 | 44.2775342  | 51.37008603 | 49.24833834 | 42.83112048 | 43.99844685 | 47.84276202 |
| ENSMUSG000000032348 | -0.608478649 | 7.516629908 | 4.465280543 | 0.034590409 | 0.999071534 | Gsta4     | Gsta4     |            | 249.7707394 | 130.6752579 | 295.8050482 | 266.2191428 | 199.608618  | 126.0968259 | 152.0809397 | 154.537446  | 90.03967874 | 178.1031783 |
| ENSMUSG00000000682  | -0.516809919 | 5.204725925 | 4.464673629 | 0.0346027   | 0.999071534 | Cd52      | Cd52      |            | 53.40700553 | 34.74396602 | 56.61630531 | 41.3517355  | 38.45670622 | 40.89233478 | 23.03864448 | 28.32380548 | 17.36367278 | 39.60753249 |
| ENSMUSG000000020994 | 0.502306618  | 6.224986199 | 4.455897355 | 0.034780938 | 0.999071534 | Pnn       | Pnn       | PNN        | 58.95122818 | 53.18316983 | 83.61171366 | 58.48911582 | 66.51440514 | 88.18773976 | 71.38096871 | 63.76310356 | 77.23298796 | 120.0644178 |
| ENSMUSG000000050890 | 0.723124082  | 3.596164154 | 4.453559097 | 0.034828587 | 0.999071534 | Pdik1l    | Pdik1l    | PDIK1L     | 7.789983723 | 6.936935196 | 10.03071283 | 10.06040545 | 11.96866877 | 12.00575665 | 15.53167044 | 10.22402095 | 20.34928167 | 11.30710086 |
| ENSMUSG000000030149 | -1.087992022 | 1.796331307 | 4.450926586 | 0.034882315 | 0.999071534 | Klrk1     | Klrk1     | KLRK1      | 6.105662918 | 7.52983564  | 4.779735644 | 2.081463196 | 3.204725518 | 4.584016176 | 2.265035272 | 1.519813953 | 0.707117896 | 1.830051006 |
| ENSMUSG000000027699 | 0.613587164  | 5.878434245 | 4.449135706 | 0.034918915 | 0.999071534 | Ect2      | Ect2      | ECT2       | 52.98592532 | 31.48301358 | 44.43134543 | 54.74248207 | 56.83482603 | 94.00871269 | 106.6508037 | 38.75525579 | 67.72618069 | 37.77748148 |
| ENSMUSG000000046721 | -1.148766962 | 2.071324759 | 4.447691395 | 0.034948462 | 0.999071534 | Rpl14-ps1 | Rpl14-ps1 |            | 9.544484562 | 8.893506661 | 4.779735644 | 2.150845303 | 3.989556257 | 4.875064822 | 0.970729402 | 4.075864691 | 1.571373102 | 1.111102397 |
| ENSMUSG000000024781 | -0.614757884 | 5.53826741  | 4.444165889 | 0.035020694 | 0.999071534 | Lipa      | Lipa      | LIPA       | 56.42474697 | 98.30289363 | 40.12285132 | 42.53123131 | 55.06895686 | 58.35525354 | 49.44248422 | 34.5412262  | 18.30649664 | 22.61420172 |
| ENSMUSG000000032402 | -0.514734109 | 4.943336484 | 4.440087252 | 0.035104453 | 0.999071534 | Smad3     | Smad3     | SMAD3      | 48.35404311 | 36.99698771 | 34.13135171 | 32.60959008 | 35.44818839 | 37.03594021 | 14.36679515 | 27.21848624 | 20.19214436 | 24.70568858 |
| ENSMUSG000000091955 | 1.725344098  | 1.934856364 | 4.438553331 | 0.035136008 | 0.999071534 | Gm9844    | Gm9844    |            | 0.912340436 | 1.778701332 | 1.817645949 | 2.636520049 | 1.765869163 | 0           | 4.077063489 | 1.381649048 | 13.27810271 | 5.882306805 |
| ENSMUSG000000024187 | -0.429281216 | 5.867167763 | 4.43686953  | 0.035170681 | 0.999071534 | Itfg3     | Fam234a   | AC004754.3 | 75.23299596 | 68.77645151 | 60.72283875 | 70.70036657 | 71.55040239 | 64.90384808 | 44.84769838 | 42.48570822 | 32.68456052 | 58.88842702 |
| ENSMUSG000000028188 | 1.045862221  | 2.671451748 | 4.432309052 | 0.035264769 | 0.999071534 | Spat1     | Spat1     |            | 4.702062247 | 3.260952442 | 7.337904017 | 3.260959008 | 2.616102464 | 2.910486461 | 4.206494076 | 8.220811835 | 12.2567102  | 10.65351121 |
| ENSMUSG000000030074 | 1.275648196  | 2.23458541  | 4.429197255 | 0.03532912  | 0.999071534 | Gxylt2    | Gxylt2    | GXYLT2     | 2.105401006 | 1.778701332 | 4.106533441 | 4.648601139 | 1.111843547 | 3.201535107 | 3.365195261 | 1.657978857 | 12.88525944 | 7.97379367  |
| ENSMUSG000000073421 | -0.734878844 | 6.885208106 | 4.428569879 | 0.035342109 | 0.999071534 | H2-Ab1    | H2-Ab1    | HLA-DQB1   | 207.171459  | 222.6341167 | 132.890115  | 71.25542343 | 139.1766511 | 142.1772636 | 32.61650791 | 110.3937589 | 48.63399751 | 107.4501376 |
| ENSMUSG000000085998 | 1.49593771   | 2.778512884 | 4.425923149 | 0.035396961 | 0.999071534 | AW822252  | AW822252  |            | 2.17558104  | 0.889350666 | 6.732022034 | 5.61995063  | 2.746907587 | 2.110102684 | 1.876743511 | 3.45412262  | 25.22053829 | 9.999921569 |
| ENSMUSG000000071451 | 0.659685515  | 5.101181926 | 4.424752219 | 0.035421256 | 0.999071534 | Psmg4     | Psmg4     | PSMG4      | 23.8612114  | 16.00831199 | 29.95749805 | 35.38487434 | 31.65483981 | 20.95550252 | 43.42396192 | 40.75864691 | 50.83391985 | 37.58140459 |
| ENSMUSG000000072769 | 0.821038655  | 2.863045922 | 4.416142596 | 0.035600429 | 0.999071534 | Gm10419   | Gm10419   |            | 7.018003354 | 2.786632087 | 6.328100712 | 5.273040098 | 5.428412612 | 6.403070214 | 7.701119924 | 8.289894287 | 8.799689371 | 11.9606905  |
| ENSMUSG000000022974 | 0.612754008  | 5.19311376  | 4.407900329 | 0.035772846 | 0.999071534 | Paxbp1    | Paxbp1    | PAXBP1     | 27.51057315 | 28.63709145 | 31.37122268 | 32.26267955 | 29.49655528 | 28.08619435 | 22.65035272 | 58.58191963 | 45.80552592 | 50.91463335 |
| ENSMUSG000000079065 | 1.026065509  | 3.705296577 | 4.406239693 | 0.035806556 | 0.999071534 | BC005561  | BC005561  | THOC2      | 7.368903522 | 4.150303108 | 16.5607742  | 10.40731598 | 5.363010051 | 7.931075606 | 5.889091707 | 13.40199576 | 28.67755911 | 22.2874069  |
| ENSMUSG000000029322 | -0.753606784 | 4.683409445 | 4.40557109  | 0.035821729 | 0.999071534 | Plac8     | Plac8     | PLAC8      | 69.61859327 | 35.98905696 | 22.68691426 | 20.32895722 | 19.35915823 | 20.2278809  | 32.22821615 | 13.26383086 | 10.37106247 | 17.25476663 |
| ENSMUSG000000031740 | -0.805829928 | 6.456009693 | 4.404801189 | 0.035837902 | 0.999071534 | Mmp2      | Mmp2      | MMP2       | 129.3418018 | 214.3335105 | 80.58230375 | 70.07592761 | 88.48966584 | 103.1039829 | 75.00502514 | 84.83325154 | 12.41384751 | 48.30027477 |
| ENSMUSG000000027641 | 0.566850026  | 5.173816842 | 4.39990147  | 0.035941007 | 0.999071534 | Rbl1      | Rbl1      | RBL1       | 35.65145704 | 23.71601776 | 29.48625651 | 23.38176991 | 38.97992671 | 55.80857789 | 62.83854997 | 27.08032134 | 37.55581714 | 25.88214994 |
| ENSMUSG000000058427 | -1.17820248  | 3.498907938 | 4.398384356 | 0.035972995 | 0.999071534 | Cxcl2     | Cxcl2     | CXCL1      | 19.93112953 | 45.0011437  | 9.963392611 | 3.122194795 | 3.27012808  | 5.23887563  | 6.989251696 | 6.562832977 | 5.578374512 | 8.235229528 |
| ENSMUSG000000097356 | 1.598771507  | 0.951023742 | 4.388950341 | 0.036172576 | 0.999071534 | Gm26774   | Gm26774   |            | 0.350900168 | 0.118580089 | 1.009803305 | 2.428373729 | 0.654025616 | 0.9459081   | 0.711868228 | 3.523205072 | 3.457020824 | 3.92153787  |
| ENSMUSG000000042903 | -0.622229027 | 4.062080665 | 4.388909838 | 0.036173436 | 0.999071534 | Foxo4     | Foxo4     | FOXO4      | 20.35220973 | 26.44335981 | 14.00260583 | 19.98204669 | 23.6757273  | 20.95550252 | 8.73656462  | 15.75079915 | 7.149747614 | 12.35284429 |
| ENSMUSG000000023456 | -0.596699812 | 9.283533078 | 4.385872932 | 0.036237931 | 0.999071534 | Tpi1      | Tpi1      | TP11       | 750.2947386 | 1171.452697 | 564.8166487 | 599.0451079 | 826.034353  | 541.2049574 | 470.9979059 | 597.5632132 | 274.4403123 | 540.4532775 |
| ENSMUSG000000097769 | 0.769613452  | 3.758130006 | 4.382148391 | 0.036317194 | 0.999071534 | Snhg4     | Snhg4     |            | 10.31646493 | 5.988294485 | 14.27188671 | 12.28063286 | 8.306125323 | 12.58785394 | 13.07248928 | 9.671543335 | 23.41345922 | 19.67304832 |
| ENSMUSG000000064137 | 1.624563185  | 1.688720497 | 4.380552143 | 0.03635122  | 0.999071534 | Rhox8     | Rhox8     |            | 1.543960738 | 0.592900444 | 2.221567271 | 2.914048475 | 0.523220493 | 1.382481069 | 0.258861174 | 1.934308667 | 8.249708785 | 9.28097296  |
| ENSMUSG000000030789 | -0.724292274 | 4.015822036 | 4.380471255 | 0.036352945 | 0.999071534 | Itgax     | Itgax     | ITGAX      | 27.65093322 | 27.5105806  | 17.50325729 | 15.33344555 | 16.21983528 | 23.79322682 | 6.859821109 | 10.91502748 | 4.871256616 | 15.0979208  |
| ENSMUSG000000028212 | 0.939389232  | 4.11426729  | 4.3791075   | 0.036382043 | 0.999071534 | Ccne2     | Ccne2     | CCNE2      | 18.10644865 | 9.071376794 | 11.44443746 | 11.51742969 | 11.11843547 | 32.5246862  | 49.96020657 | 4.421276953 | 14.37806388 | 11.17638293 |
| ENSMUSG000000060992 | -0.564958359 | 7.3644314   | 4.37248271  | 0.036523741 | 0.999071534 | Copz1     | Copz1     | COPZ1      | 231.5941107 | 180.5974753 | 227.609665  | 210.6440755 | 167.7575705 | 236.4770249 | 127.8127046 | 104.1763382 | 67.0190628  | 134.44339   |
| ENSMUSG000000081058 | -1.48997627  | 0.622101892 | 4.371892673 | 0.036536389 | 0.999071534 | Hist2h3c2 | Hist2h3c2 |            | 2.105401006 | 1.48225111  | 0.942483085 | 2.22022741  | 3.989556257 | 1.091432423 | 0.453007054 | 0.690824524 | 0           | 1.437897219 |
| ENSMUSG000000081043 | 1.77108629   | 0.998107237 | 4.364998387 | 0.036684518 | 0.999071534 | Gm11512   | Gm11512   |            | 0.280720134 | 0.5336104   | 1.413724627 | 1.179495811 | 1.046440986 | 0.145524323 | 0.517722348 | 2.901463001 | 7.6997282   | 1.241820326 |
| ENSMUSG000000031778 | -0.56252477  | 5.517441028 | 4.362648806 | 0.036735144 | 0.999071534 | Cx3cl1    | Cx3cl1    | CX3CL1     | 48.84530335 | 76.24699711 | 46.85487336 | 58.14220529 | 52.38745184 | 76.61855608 | 32.7459385  | 23.55711627 | 22.78490998 | 31.37230296 |
| ENSMUSG000000077192 | 1.44987651   | 0.864888168 | 4.356244584 | 0.036873507 | 0.999071534 | Snora17   | Snora17   | SNORA17    | 0.561440268 | 0.415030311 | 2.154247051 | 0.20814632  | 1.438856355 | 1.309718907 | 1.035444696 | 2.625133191 | 3.8498641   | 2.61435858  |
| ENSMUSG000000031903 | -0.445558496 | 6.309847225 | 4.333123727 | 0.03737759  | 0.999071534 | Pla2g15   | Pla2g15   | PLA2G15    | 89.970803   | 103.6982877 | 87.58360666 | 98.80011973 | 93.59106564 | 90.0067938  | 67.36862051 | 70.46410144 | 37.24154252 | 66.14327208 |
| ENSMUSG000000096544 | -4.20239882  | 2.762858975 | 4.332979105 | 0.037380766 | 0.999071534 | Gm4617    | Gm4617    |            | 47.72242281 | 19.0913943  | 0           | 0           | 0           | 0           | 3.300479967 | 0           | 0           | 0           |
| ENSMUSG000000026832 | -0.842783641 | 3.62853694  | 4.331350044 | 0.037416557 | 0.999071534 | Cytip     | Cytip     | CYTIP      | 26.38769261 | 26.85839012 | 11.37711724 | 7.007592761 | 10.7260201  | 14.98900527 | 7.571689337 | 8.566224097 | 3.142746204 | 9.934562605 |

|                      |              |              |             |             |             |          |           |           |             |             |             |             |             |             |             |             |             |             |
|----------------------|--------------|--------------|-------------|-------------|-------------|----------|-----------|-----------|-------------|-------------|-------------|-------------|-------------|-------------|-------------|-------------|-------------|-------------|
| ENSMUSG00000068184   | 0.599597136  | 4.87290293   | 4.323190178 | 0.037596375 | 0.999071534 | Ndufaf2  | Ndufaf2   | NDUFAF2   | 16.70284798 | 17.60914319 | 28.27449254 | 30.59750899 | 26.48803745 | 24.37532411 | 48.27760894 | 29.77453698 | 34.96305152 | 28.49650852 |
| ENSMUSG000000022070  | 0.672966748  | 4.20623214   | 4.322243964 | 0.037617285 | 0.999071534 | Bora     | Bora      | BORA      | 15.72032751 | 8.004155995 | 22.48495359 | 14.29271395 | 12.68809695 | 22.84731872 | 17.79670571 | 15.75079915 | 29.30610835 | 20.32663796 |
| ENSMUSG000000097308  | 1.8044218    | 0.581397852  | 4.311920609 | 0.03784621  | 0.999071534 | Gm6410   | Gm6410    |           | 0           | 1.48225111  | 1.077123525 | 0.20814632  | 0.39241537  | 0.800383777 | 0.388291761 | 1.796143762 | 2.278490998 | 4.705845444 |
| ENSMUSG000000021483  | -0.906421959 | 2.310372362  | 4.3028004   | 0.03804967  | 0.999071534 | Cdk20    | Cdk20     | CDK20     | 9.053224327 | 5.573264174 | 5.85685917  | 5.481186417 | 6.801866406 | 4.001918884 | 5.047792891 | 4.144947144 | 1.964216377 | 1.241820326 |
| ENSMUSG00000018068   | 0.498924035  | 4.679951974  | 4.302795785 | 0.038049773 | 0.999071534 | Ints2    | Ints2     | INTS2     | 20.14166963 | 21.34441599 | 20.66730764 | 20.39833933 | 27.27286819 | 31.79706459 | 24.65652682 | 26.73490908 | 32.76312918 | 26.20894477 |
| ENSMUSG000000032085  | 1.061302264  | 5.217547624  | 4.300759575 | 0.038095355 | 0.999071534 | Tagln    | Tagln     | TAGLN     | 23.29977114 | 45.94978442 | 27.66861056 | 13.25198235 | 15.17339429 | 134.246188  | 82.12370743 | 18.99767441 | 19.95643839 | 8.300588492 |
| ENSMUSG000000030718  | -0.624679963 | 5.32460069   | 4.283052728 | 0.038494153 | 0.999071534 | Ppme1    | Ppme1     | PPME1     | 48.91548338 | 75.47622653 | 34.33331237 | 34.48290695 | 59.97414898 | 47.58645364 | 30.99862558 | 42.69295558 | 10.99961171 | 25.16320133 |
| ENSMUSG000000037649  | -0.676593536 | 4.811291119  | 4.271751374 | 0.038750971 | 0.999071534 | H2-DMa   | H2-DMa    | HLA-DMA   | 48.63476324 | 41.14729082 | 36.55487965 | 20.88401407 | 32.50507311 | 42.85691314 | 17.53784453 | 24.86968286 | 6.442629718 | 18.30051006 |
| ENSMUSG00000014850   | 0.541042245  | 4.249386503  | 4.269632016 | 0.038799332 | 0.999071534 | Msh3     | Msh3      | MSH3      | 14.17636678 | 13.57742017 | 18.8496617  | 12.76630761 | 20.73261203 | 24.9574214  | 16.8259763  | 25.07693022 | 17.83508471 | 23.52922722 |
| ENSMUSG000000045140  | 0.732818358  | 3.046684483  | 4.265813804 | 0.038886619 | 0.999071534 | Pigw     | Pigw      | PIGW      | 7.088183388 | 4.802493597 | 6.866662475 | 5.758714844 | 7.259684337 | 13.97033501 | 14.10793398 | 6.217420715 | 8.17114013  | 7.320204025 |
| ENSMUSG00000018920   | -0.506056217 | 6.145802081  | 4.257168153 | 0.039085025 | 0.999071534 | Cxcl16   | Cxcl16    | CXCL16    | 116.5690357 | 104.5876383 | 79.23589934 | 65.21918016 | 66.71061283 | 91.24375055 | 62.70911938 | 57.6147653  | 30.72034414 | 49.14994131 |
| ENSMUSG000000082035  | 1.403358734  | 7.715482716  | 4.256541185 | 0.039099455 | 0.999071534 | Gm14934  | Rpl17-ps8 |           | 1.754500839 | 92.07743896 | 190.9201449 | 183.9319645 | 121.1255441 | 76.47303176 | 220.8085814 | 359.5050823 | 474.0832649 | 233.2661443 |
| ENSMUSG000000068686  | 0.681713038  | 3.677290435  | 4.25094327  | 0.039228536 | 0.999071534 | Cd59b    | Cd59b     | CD59      | 13.89564664 | 5.454684085 | 11.64639812 | 9.366584384 | 10.20279961 | 17.60844309 | 17.14955277 | 8.428059192 | 12.88525944 | 19.60768935 |
| ENSMUSG000000037379  | -1.301441804 | 0.863447187  | 4.249822637 | 0.03925443  | 0.999071534 | Spon2    | Spon2     | SPON2     | 3.017741442 | 2.845922132 | 2.88887492  | 2.844666369 | 1.373453794 | 0.727621615 | 1.68259763  | 0.828989429 | 1.178529826 | 0.130717929 |
| ENSMUSG000000019066  | -0.690399263 | 3.383335563  | 4.242313017 | 0.039428415 | 0.999071534 | Rab3d    | Rab3d     | RAB3D     | 16.21158775 | 15.11896132 | 10.03071283 | 10.75422652 | 14.19235587 | 13.46099988 | 6.212668174 | 6.700997882 | 3.771295445 | 9.411690889 |
| ENSMUSG000000022674  | 0.559361732  | 6.355676206  | 4.241960331 | 0.039436606 | 0.999071534 | Ube2v2   | Ube2v2    | UBE2V2    | 72.28543455 | 47.01700521 | 69.33982695 | 84.85431631 | 68.14946918 | 73.85359395 | 145.9977021 | 72.95106973 | 93.33956226 | 76.01247572 |
| ENSMUSG000000051343  | -0.539465338 | 5.898752599  | 4.241785248 | 0.039440673 | 0.999071534 | Rab11fp5 | Rab11fp5  | RAB11FIP5 | 88.21630216 | 98.5400538  | 57.28950751 | 56.1995063  | 67.56084613 | 92.99004243 | 42.00022547 | 45.66350103 | 23.02061594 | 42.28725003 |
| ENSMUSG000000052914  | 1.156901047  | 0.721479319  | 4.240795398 | 0.039463674 | 0.999071534 | Cyp2j6   | Cyp2j6    | CYP2J2    | 1.19306057  | 0.711480533 | 1.009803305 | 1.110113705 | 0.850233301 | 1.45524323  | 3.235764674 | 1.657978857 | 1.728510412 | 1.960768935 |
| ENSMUSG000000022313  | 0.543856926  | 4.884740537  | 4.237548913 | 0.039539211 | 0.999071534 | Utp23    | Utp23     | UTP23     | 21.26455016 | 16.30476221 | 35.47775612 | 24.70002993 | 26.2264272  | 35.14412402 | 33.00479967 | 23.69528117 | 35.59160076 | 39.15001974 |
| ENSMUSG000000021366  | -0.633196506 | 4.694162086  | 4.236634743 | 0.039560509 | 0.999071534 | Hivep1   | Hivep1    | HIVEP1    | 27.08949295 | 45.65333419 | 31.37122268 | 24.97755836 | 34.00933203 | 31.28772945 | 14.49622574 | 25.07693022 | 6.442629718 | 24.1174579  |
| ENSMUSG000000087593  | 2.224832223  | -0.747087865 | 4.234029596 | 0.039621267 | 0.999071534 | Gm16174  | Gm16174   |           | 0.280720134 | 0.177870133 | 0.201960661 | 0           | 0.196207685 | 0           | 0.841298815 | 0.27632981  | 1.099961171 | 1.372538255 |
| ENSMUSG000000061331  | 1.028479847  | 3.373791329  | 4.230910828 | 0.039694134 | 0.999071534 | Gm17132  | Gm17132   |           | 4.421342113 | 2.312311732 | 11.84835878 | 7.701413827 | 8.567735569 | 5.602686437 | 5.565515239 | 14.43823255 | 21.21353688 | 15.35935666 |
| ENSMUSG000000092329  | -0.715694242 | 6.734491438  | 4.222408716 | 0.039893491 | 0.999071534 | Gm20388  | Gm20388   | GALNT2    | 147.3780704 | 211.5468784 | 57.62610861 | 117.5332885 | 155.3964864 | 132.2816096 | 101.0205731 | 87.04389002 | 23.33489056 | 63.98642625 |
| ENSMUSG000000003573  | -0.544569355 | 4.66735335   | 4.211700532 | 0.040146071 | 0.999071534 | Homer3   | Homer3    | HOMER3    | 36.56379748 | 41.20658086 | 23.56207712 | 24.00620887 | 31.06621676 | 37.32698886 | 16.30825396 | 19.41216912 | 13.51380868 | 16.27438216 |
| ENSMUSG000000024620  | -0.584208905 | 6.825367497  | 4.210748675 | 0.040168604 | 0.999071534 | Pdgfrb   | Pdgfrb    | PDGFRB    | 84.84766055 | 179.2930943 | 188.9678585 | 132.7279698 | 117.9862211 | 126.606161  | 47.56574071 | 101.8275348 | 68.35472994 | 99.21490812 |
| ENSMUSG0000000020475 | -1.55009919  | 0.984878069  | 4.205669004 | 0.040289079 | 0.999071534 | Pgam2    | Pgam2     | PGAM2     | 6.105662918 | 0.770770577 | 4.308494102 | 2.01208109  | 1.111843547 | 0.509335131 | 0.129430587 | 0.898071881 | 0.392843275 | 2.548999616 |
| ENSMUSG000000005360  | 0.880167294  | 2.991048537  | 4.205243991 | 0.040299177 | 0.999071534 | Slc1a3   | Slc1a3    | SLC1A3    | 5.824942784 | 6.166164618 | 4.173853661 | 5.966861163 | 6.474853598 | 4.29296753  | 6.536244641 | 7.737234668 | 14.77090716 | 12.94107497 |
| ENSMUSG000000062345  | 1.335745482  | 3.481380814  | 4.20141367  | 0.040390295 | 0.999071534 | Serpib2  | Serpib2   | SERPINB2  | 4.35116208  | 8.419186306 | 12.31960032 | 5.342422204 | 1.962076848 | 5.020589145 | 14.75508691 | 46.2852431  | 6.678335683 | 1.895409971 |
| ENSMUSG000000035649  | 0.626349517  | 4.800100025  | 4.199784983 | 0.040429105 | 0.999071534 | Zcchc7   | Zcchc7    | ZCCHC7    | 22.8085109  | 19.20997439 | 30.89998114 | 15.68035608 | 24.98377853 | 21.31931333 | 19.22044216 | 37.16635939 | 35.04162017 | 44.83624965 |
| ENSMUSG000000028036  | -0.976172574 | 3.175951316  | 4.19890238  | 0.040450153 | 0.999071534 | Ptgfr    | Ptgfr     | PTGFR     | 12.562226   | 12.39161928 | 5.85685917  | 22.41042042 | 7.194281776 | 4.656778337 | 9.383717555 | 1.657978857 | 6.442629718 | 6.274460592 |
| ENSMUSG000000026042  | 1.016046658  | 5.403406389  | 4.185452687 | 0.040772322 | 0.999071534 | Col5a2   | Col5a2    | COL5A2    | 35.51109697 | 33.61745518 | 40.86337375 | 11.86434022 | 24.19894779 | 117.1470801 | 121.5353212 | 18.8595095  | 8.721120716 | 28.10435474 |
| ENSMUSG000000040025  | 0.512418065  | 5.820054547  | 4.183950986 | 0.04080846  | 0.999071534 | Ythdf2   | Ythdf2    | YTHDF2    | 38.73937852 | 45.83120433 | 54.9332998  | 51.41214095 | 49.57514169 | 60.75640487 | 46.78915719 | 63.14136149 | 84.61844154 | 54.90153018 |
| ENSMUSG000000030862  | 1.403729765  | 2.016617264  | 4.183605343 | 0.040816783 | 0.999071534 | Cpxm2    | Cpxm2     | CPXM2     | 2.38612114  | 1.837991377 | 4.375814322 | 0.277528426 | 2.354492217 | 6.621356699 | 16.37296925 | 1.174401691 | 2.042785033 | 2.156845829 |
| ENSMUSG000000024940  | -0.520851918 | 7.213427307  | 4.182469494 | 0.040844145 | 0.999071534 | Ltbp3    | Ltbp3     | LTBP3     | 170.8883817 | 239.7096495 | 149.9221307 | 165.7538525 | 182.146134  | 137.8842961 | 77.59363688 | 129.5295982 | 106.0676844 | 135.6852103 |
| ENSMUSG000000027569  | 0.525566077  | 4.183349393  | 4.182388314 | 0.040846102 | 0.999071534 | Mrgbp    | Mrgbp     | MRGBP     | 15.93086761 | 16.36405226 | 13.59868451 | 12.76630761 | 18.37811981 | 23.93875114 | 19.8028798  | 23.97161098 | 12.09957289 | 24.3135348  |
| ENSMUSG000000048163  | -0.661387878 | 4.440969593  | 4.174713278 | 0.041031505 | 0.999071534 | Selplg   | Selplg    | SELPLG    | 45.33630167 | 32.72810451 | 18.17645949 | 21.02277828 | 20.79801459 | 29.39591325 | 22.06791508 | 10.70778012 | 8.092571475 | 14.11753633 |
| ENSMUSG000000045092  | -0.438372111 | 5.327264628  | 4.172443855 | 0.041086496 | 0.999071534 | S1pr1    | S1pr1     | S1PR1     | 46.59954227 | 48.32138619 | 63.2136869  | 38.99274388 | 42.11924967 | 41.76548071 | 35.07568907 | 33.29774205 | 26.63477408 | 28.49650852 |
| ENSMUSG000000052302  | -1.369973881 | 0.495625024  | 4.170666036 | 0.041129628 | 0.999071534 | Tbc1d30  | Tbc1d30   | TBC1D30   | 2.737021308 | 2.96450222  | 1.413724627 | 1.248877918 | 1.177246109 | 1.819054038 | 0.517722348 | 0.414494714 | 0.628549241 | 0.196076894 |
| ENSMUSG000000004415  | -2.088500242 | -0.436492    | 4.170127075 | 0.041142714 | 0.999071534 | Col26a1  | Col26a1   | COL26A1   | 1.403600671 | 0.296450222 | 1.683005509 | 1.318260024 | 0.327012808 | 0.873145938 | 0.129430587 | 0.207247357 | 0           | 0           |

|                      |              |              |             |             |             |               |               |          |             |             |             |             |             |             |             |             |             |             |
|----------------------|--------------|--------------|-------------|-------------|-------------|---------------|---------------|----------|-------------|-------------|-------------|-------------|-------------|-------------|-------------|-------------|-------------|-------------|
| ENSMUSG00000033257   | 0.455887779  | 5.137639381  | 4.164941403 | 0.041268841 | 0.999071534 | Ttl4          | Ttl4          | TTL4     | 34.3180364  | 25.61329918 | 32.98690797 | 22.68794884 | 38.6529139  | 45.91292392 | 34.55796672 | 35.57746298 | 33.70595304 | 46.47022376 |
| ENSMUSG000000097352  | 0.846402841  | 3.548380652  | 4.161828906 | 0.041344738 | 0.999071534 | C920009B18Rik | C920009B18Rik |          | 5.333682549 | 5.158233863 | 11.44443746 | 12.00310443 | 8.633138131 | 9.750129644 | 10.48387754 | 10.84594503 | 24.59198905 | 12.09140843 |
| ENSMUSG000000020100  | -0.494779735 | 5.13345708   | 4.158925465 | 0.04141567  | 0.999071534 | Slc29a3       | Slc29a3       | SLC29A3  | 35.58127701 | 44.34895322 | 39.0457278  | 42.60061342 | 50.81779036 | 47.73197796 | 21.61490802 | 29.42912472 | 15.24231909 | 31.1108671  |
| ENSMUSG000000067870  | 0.678383936  | 8.558234621  | 4.132697153 | 0.042062261 | 0.999071534 | RpB1-ps8      | RpB1-ps8      |          | 226.2604281 | 357.6375479 | 296.9494919 | 250.2612583 | 377.438183  | 192.819728  | 539.6608323 | 622.0184014 | 395.6717471 | 421.5653211 |
| ENSMUSG000000039748  | 0.858073861  | 3.313827788  | 4.132388528 | 0.042069932 | 0.999071534 | Exo1          | Exo1          | EXO1     | 10.2462849  | 3.794562842 | 7.539864678 | 5.550568524 | 9.287163747 | 22.92008088 | 18.63800452 | 3.799534882 | 8.32827744  | 9.934562605 |
| ENSMUSG000000031922  | 0.473553163  | 5.185693139  | 4.125085243 | 0.042251892 | 0.999071534 | Cep57         | Cep57         | CEP57    | 37.68667801 | 23.24169741 | 34.93919436 | 30.45874478 | 31.327827   | 38.05461048 | 51.18979714 | 43.10745029 | 36.29871866 | 33.07163604 |
| ENSMUSG000000047180  | -0.571209898 | 4.607965732  | 4.122156881 | 0.042325084 | 0.999071534 | Neur13        | Neur13        | NEURL3   | 48.91548338 | 28.75567154 | 25.98560505 | 24.07559097 | 23.41411705 | 34.19821592 | 17.99085159 | 14.02373784 | 12.33527885 | 19.08481764 |
| ENSMUSG000000020101  | -0.639168594 | 5.886909279  | 4.121454627 | 0.042342656 | 0.999071534 | 4632428N05Rik | Vsir          | C10orf54 | 101.4803285 | 111.7617337 | 45.44114873 | 55.64444945 | 61.02058997 | 84.76791817 | 65.42716171 | 28.18564058 | 21.13496822 | 34.77096912 |
| ENSMUSG000000061981  | -0.441153691 | 5.907761541  | 4.113671175 | 0.04253793  | 0.999071534 | Flot2         | Flot2         | FLOT2    | 84.56694042 | 89.70583719 | 58.16467038 | 58.21158739 | 68.8034948  | 76.90960473 | 51.70751949 | 47.25239744 | 34.88448286 | 40.39184006 |
| ENSMUSG000000021281  | -0.448461215 | 6.793441647  | 4.111319891 | 0.042597106 | 0.999071534 | Tnfaip2       | Tnfaip2       | TNFAIP2  | 153.9048136 | 156.229267  | 116.1947003 | 110.8726063 | 128.5814361 | 123.4773881 | 74.03429574 | 94.29754752 | 73.85453579 | 91.30647341 |
| ENSMUSG000000041378  | -0.583093815 | 5.684493202  | 4.108640918 | 0.042664635 | 0.999071534 | Cldn5         | Cldn5         | CLDN5    | 58.17924781 | 54.30968068 | 91.69014011 | 80.83015413 | 31.58943725 | 30.05077271 | 37.79373139 | 44.8345116  | 34.33450228 | 48.16955684 |
| ENSMUSG000000020628  | -0.555368858 | 4.007292559  | 4.10539379  | 0.042746636 | 0.999071534 | Trappc12      | Trappc12      | TRAPPC12 | 23.93139144 | 21.7594463  | 14.81044848 | 17.76181928 | 20.53640434 | 19.35473496 | 11.64875283 | 13.60924312 | 7.542590889 | 11.82997258 |
| ENSMUSG000000006732  | 0.572141623  | 5.645108406  | 4.105044051 | 0.042755478 | 0.999071534 | Mettl1        | Mettl1        | METTL1   | 40.28333925 | 24.13104807 | 52.10585054 | 52.38349044 | 38.19509597 | 46.85883202 | 50.21906774 | 45.38717122 | 75.5830462  | 60.45704217 |
| ENSMUSG000000007080  | 0.602336704  | 4.663995472  | 4.098893599 | 0.042911286 | 0.999071534 | Pole          | Pole          | POLE     | 19.65040939 | 11.44297857 | 28.40913298 | 22.2716562  | 21.90985813 | 44.09386988 | 19.41458804 | 20.44840591 | 34.09879631 | 28.82330335 |
| ENSMUSG0000000042298 | 0.539557013  | 4.675445578  | 4.094905511 | 0.043012634 | 0.999071534 | Ttc19         | Ttc19         | TTC19    | 17.82572852 | 21.70015625 | 26.32220615 | 21.57783514 | 19.88237873 | 22.1196971  | 25.95083269 | 30.81077377 | 34.96305152 | 27.05861131 |
| ENSMUSG000000092986  | 1.626546751  | 0.876781711  | 4.08873492  | 0.043169942 | 0.999071534 | Gm25574       | Gm25574       |          | 0.701800335 | 0.415030311 | 0.403921322 | 1.318260024 | 1.569661478 | 1.382481069 | 0.388291761 | 0.483577167 | 7.071178959 | 2.091486864 |
| ENSMUSG000000021423  | -0.616634399 | 3.888729445  | 4.071486359 | 0.043612882 | 0.999071534 | Ly86          | Ly86          | LY86     | 14.66762701 | 17.60914319 | 19.25358302 | 15.54159187 | 25.44159646 | 20.66445387 | 11.26046107 | 9.947873145 | 5.264099892 | 11.30710086 |
| ENSMUSG000000089844  | -1.484092787 | 0.599246568  | 4.071338647 | 0.043616696 | 0.999071534 | A530032D15Rik | A530032D15Rik | SP140    | 2.807201342 | 1.600831199 | 1.750325729 | 3.052812688 | 1.24264867  | 1.673529715 | 1.229590576 | 0           | 0.392843275 | 0.392153787 |
| ENSMUSG000000052675  | 1.1042211    | 1.42980219   | 4.066039572 | 0.043753745 | 0.999071534 | Zfp112        | Zfp112        | ZNF112   | 1.894860906 | 1.422961066 | 1.615685288 | 0.485674746 | 3.139322957 | 2.255627007 | 2.394465859 | 3.868617334 | 2.514196963 | 5.686229912 |
| ENSMUSG000000022020  | 0.576566894  | 4.525950921  | 4.064048544 | 0.043805356 | 0.999071534 | Naa16         | Naa16         | NAA16    | 13.54474647 | 21.58157616 | 16.76273487 | 24.49188361 | 18.50892493 | 21.10102684 | 21.48547744 | 26.04408455 | 31.74173666 | 28.1697137  |
| ENSMUSG000000019278  | 2.632849869  | -0.669233705 | 4.06236727  | 0.043848988 | 0.999071534 | Dpep1         | Dpep1         | DPEP1    | 0.561440268 | 0           | 0           | 0           | 0.130805123 | 1.673529715 | 2.006174098 | 0.207247357 | 0           | 0.522871716 |
| ENSMUSG000000070392  | -0.880391035 | 3.098807529  | 4.062062569 | 0.0438569   | 0.999071534 | Gm20634       | Gm20634       |          | 7.579443623 | 18.43920381 | 9.020909526 | 10.40731598 | 11.24924059 | 2.692199976 | 3.300479967 | 4.90485412  | 6.914041649 | 9.673126747 |
| ENSMUSG000000020014  | 1.263031215  | 0.952886632  | 4.060167722 | 0.043906138 | 0.999071534 | Gm872         | Cfap54        | CFAP54   | 0.421080201 | 1.541541155 | 1.615685288 | 0.277528426 | 1.700466601 | 1.528005392 | 1.423736457 | 2.625133191 | 2.435628308 | 4.052255799 |
| ENSMUSG000000064337  | 1.112800381  | 9.130612627  | 4.054575036 | 0.044051805 | 0.999071534 | mt-Rnr1       | mt-Rnr1       |          | 220.5056654 | 238.8795889 | 425.1945117 | 682.7199284 | 239.3733754 | 165.1701067 | 199.7113957 | 704.9173442 | 1579.937085 | 679.0796412 |
| ENSMUSG000000067242  | 1.640261005  | -0.295838325 | 4.050510154 | 0.044157998 | 0.999071534 | Lgi1          | Lgi1          | LG11     | 0.350900168 | 0.118580089 | 0.538561763 | 0.346910533 | 0.39241537  | 0.363810808 | 0.453007054 | 1.036236786 | 1.728510412 | 1.241820326 |
| ENSMUSG000000024059  | 0.606205459  | 5.069954241  | 4.036328568 | 0.0445306   | 0.999071534 | Clip4         | Clip4         | CLIP4    | 24.14193154 | 20.27719519 | 26.05292527 | 31.15256584 | 35.84060375 | 25.9033295  | 21.55019273 | 46.1470782  | 45.56981996 | 49.01922338 |
| ENSMUSG000000084235  | 1.65291829   | 0.45638812   | 4.034466972 | 0.044579756 | 0.999071534 | Gm15421       | Gm15421       |          | 0           | 0.237160178 | 1.211763966 | 0.624438959 | 1.046440986 | 0.436572969 | 2.653327033 | 0.967154334 | 2.592765618 | 2.091486864 |
| ENSMUSG000000034764  | 1.48372369   | 0.430020967  | 4.028406046 | 0.044740193 | 0.999071534 | 1700006J14Rik | 1700006J14Rik |          | 0           | 0.830060622 | 1.346404407 | 0.555056852 | 0.588623054 | 1.236956746 | 1.035444696 | 2.210638477 | 2.042785033 | 1.960768935 |
| ENSMUSG000000052713  | -0.618837826 | 3.567298518  | 4.028102119 | 0.044748254 | 0.999071534 | Zfp608        | Zfp608        | ZNF608   | 11.2989854  | 13.39955004 | 16.5607742  | 15.61097397 | 16.67765321 | 14.40690798 | 6.989251696 | 8.497141644 | 5.421237202 | 10.58815225 |
| ENSMUSG000000037337  | -1.266649436 | 1.326870867  | 4.025981708 | 0.044804537 | 0.999071534 | Map4k1        | Map4k1        | MAP4K1   | 4.631882214 | 3.260952442 | 2.894769475 | 3.746633754 | 2.812310149 | 4.511254014 | 0.776583522 | 0.967154334 | 0.078568655 | 1.111102397 |
| ENSMUSG000000066324  | 0.485490847  | 6.65323748   | 4.023774241 | 0.04486321  | 0.999071534 | Impad1        | Impad1        | IMPAD1   | 66.24995166 | 89.70583719 | 94.45026914 | 83.32790997 | 100.9815551 | 92.33518297 | 122.9590576 | 116.6111796 | 122.4885333 | 98.62667744 |
| ENSMUSG000000035754  | 0.433096057  | 5.352384583  | 4.022856655 | 0.044887622 | 0.999071534 | Wdr18         | Wdr18         | WDR18    | 41.82729999 | 28.81496158 | 40.25749176 | 33.16464693 | 35.97140888 | 53.55295088 | 51.83695008 | 35.23205072 | 42.3485051  | 42.87548072 |
| ENSMUSG000000000056  | -0.604661869 | 4.072639126  | 4.019664274 | 0.044972665 | 0.999071534 | Narf          | Narf          | NARF     | 24.91391191 | 26.38406976 | 15.34901024 | 13.39074656 | 25.31079134 | 16.88082147 | 14.69037162 | 15.40538688 | 5.578374512 | 13.00643394 |
| ENSMUSG0000000049517 | 0.737124314  | 8.067282485  | 4.019206743 | 0.044984867 | 0.999071534 | Rps23         | Rps23         |          | 136.3598052 | 190.0838824 | 216.1652275 | 278.4997757 | 215.1744277 | 137.6660096 | 272.1278091 | 331.2503592 | 479.4259334 | 302.2852108 |
| ENSMUSG0000000040724 | 1.829367395  | 0.277624964  | 4.015443141 | 0.045085374 | 0.999071534 | Kcna2         | Kcna2         | KCNA2    | 0.491260235 | 0.118580089 | 1.009803305 | 0.693821065 | 0.196207685 | 0.582097292 | 0.323576467 | 0.27632981  | 4.32127603  | 2.091486864 |
| ENSMUSG000000038855  | -0.69515157  | 3.835634166  | 4.014644224 | 0.045106739 | 0.999071534 | Itpkb         | Itpkb         | ITPKB    | 22.73833087 | 21.99660648 | 19.859465   | 14.22333184 | 12.16487646 | 23.35665385 | 7.830550511 | 7.046410144 | 5.106962581 | 11.89533154 |
| ENSMUSG000000025268  | -0.449327422 | 6.287306089  | 4.004429369 | 0.045380856 | 0.999071534 | Maged2        | Maged2        | MAGED2   | 91.65512381 | 120.2995001 | 85.29471917 | 82.77285311 | 87.96644535 | 75.4543615  | 72.80470516 | 78.33950101 | 36.69156193 | 59.60737563 |
| ENSMUSG000000043099  | -0.696329731 | 3.3697965    | 3.998807331 | 0.045532473 | 0.999071534 | Hic1          | Hic1          | HIC1     | 9.333944461 | 10.49433786 | 15.48365068 | 14.29271395 | 15.69661478 | 14.04309717 | 4.853647011 | 6.079255811 | 7.464022234 | 5.94766577  |
| ENSMUSG000000089942  | 2.071979289  | 1.420822393  | 3.996297625 | 0.045600327 | 0.999071534 | Pira2         | Pira2         | LILRA4   | 3.789721811 | 1.422961066 | 0           | 0           | 0           | 2.328389169 | 1.553167044 | 4.490359406 | 4.714119306 | 6.209101628 |

|                     |              |              |             |             |             |               |               |          |             |             |             |             |             |             |             |             |             |             |
|---------------------|--------------|--------------|-------------|-------------|-------------|---------------|---------------|----------|-------------|-------------|-------------|-------------|-------------|-------------|-------------|-------------|-------------|-------------|
| ENSMUSG00000019787  | -3.626027963 | -0.629448214 | 3.990258286 | 0.045764049 | 0.999071534 | Trdn          | Trdn          | TRDN     | 2.245761073 | 0           | 2.692808814 | 0           | 0           | 0           | 0           | 0           | 0           | 0.326794823 |
| ENSMUSG000000087190 | 2.671028022  | -0.872526451 | 3.98430257  | 0.04592611  | 0.999071534 | D430001F17Rik | D430001F17Rik |          | 0           | 0.059290044 | 0.471241542 | 0           | 0.065402562 | 0.218286485 | 0           | 0.207247357 | 1.885647722 | 1.045743432 |
| ENSMUSG000000068014 | 1.508706239  | 1.401035389  | 3.982706921 | 0.045969632 | 0.999071534 | Gm14648       | Gm14648       |          | 0.280720134 | 0           | 1.615685288 | 2.428373729 | 2.419894779 | 2.037340523 | 2.459181152 | 3.45412262  | 5.656943167 | 3.529384083 |
| ENSMUSG000000005682 | 0.681646808  | 4.513041938  | 3.97885194  | 0.046074957 | 0.999071534 | Pan2          | Pan2          | PAN2     | 16.07122768 | 19.15068434 | 14.06992605 | 16.72108768 | 24.72216828 | 18.69987551 | 11.97232929 | 43.52194501 | 20.50641898 | 38.10427631 |
| ENSMUSG00000019969  | -0.418560063 | 5.492542895  | 3.973758884 | 0.046214499 | 0.999071534 | Psen1         | Psen1         | PSEN1    | 55.02111463 | 52.64955943 | 48.73983953 | 51.34275885 | 59.12391568 | 57.26382112 | 36.88771728 | 37.4426892  | 23.17775325 | 35.62063566 |
| ENSMUSG00000081487  | 1.890930105  | 1.143000064  | 3.969247758 | 0.046338469 | 0.999071534 | Gm13689       | Gm13689       |          | 0.701800335 | 0           | 1.077123525 | 1.595788451 | 1.24264867  | 0.218286485 | 0.19414588  | 1.796143762 | 7.778296855 | 4.379050622 |
| ENSMUSG000000058905 | -2.248277153 | 1.005944848  | 3.969206602 | 0.046339602 | 0.999071534 | Gm10051       | Gm10051       |          | 0           | 0.711480533 | 5.318297407 | 8.742145425 | 0.719428178 | 0.9459081   | 0.647152935 | 0           | 0           | 1.699333077 |
| ENSMUSG000000027022 | -3.366837292 | -0.644751092 | 3.964785655 | 0.046461437 | 0.999071534 | Xirp2         | Xirp2         | XIRP2    | 2.315941107 | 0           | 2.490848153 | 0           | 0           | 0.072762162 | 0           | 0           | 0           | 0.326794823 |
| ENSMUSG000000037553 | -0.410458231 | 5.603112654  | 3.964142425 | 0.046479191 | 0.999071534 | Zdhhc18       | Zdhhc18       | ZDHHC18  | 60.42500888 | 56.02909196 | 62.00192293 | 54.67309996 | 54.08791844 | 64.1034643  | 34.6873973  | 39.16975051 | 28.04900987 | 39.93432731 |
| ENSMUSG000000074063 | -0.808262955 | 2.742273934  | 3.962509262 | 0.046524303 | 0.999071534 | Osgin1        | Osgin1        | OSGIN1   | 5.614402683 | 13.57742017 | 9.82875217  | 6.730064335 | 7.586697145 | 4.729540499 | 4.918362304 | 7.460904859 | 2.78490998  | 3.790819941 |
| ENSMUSG000000068240 | 0.665308293  | 7.657692021  | 3.948146829 | 0.046923015 | 0.999071534 | Gm11808       | Gm11808       |          | 153.4135533 | 118.1057685 | 220.0698003 | 134.3237583 | 185.4816647 | 122.2404314 | 158.4877537 | 297.1236277 | 233.1131997 | 346.206435  |
| ENSMUSG000000035878 | 1.23862888   | 1.30758451   | 3.943141435 | 0.047062814 | 0.999071534 | Hykk          | Hykk          | HYKK     | 1.684320805 | 1.837991377 | 2.288887492 | 1.040731598 | 0.457817931 | 2.110102684 | 1.941458804 | 2.072473572 | 6.992610304 | 1.764692042 |
| ENSMUSG000000042804 | -0.539362379 | 4.57826701   | 3.942059469 | 0.047093091 | 0.999071534 | Gpr153        | Gpr153        | GPRI53   | 27.93165335 | 39.07213926 | 29.28429585 | 25.60199732 | 24.32975291 | 22.48350791 | 13.07248928 | 22.38271458 | 10.8424744  | 26.01286787 |
| ENSMUSG000000044734 | -0.663279513 | 3.072735436  | 3.938249331 | 0.047199873 | 0.999071534 | Serpinb1a     | Serpinb1a     | SERPINB1 | 10.8779052  | 13.51813012 | 10.9058757  | 8.672763319 | 8.763943254 | 7.712789121 | 6.795105815 | 6.770080335 | 5.264099892 | 4.509768551 |
| ENSMUSG000000057836 | 1.856094441  | -0.044517995 | 3.93668271  | 0.047243853 | 0.999071534 | Xlr3a         | Xlr3a         |          | 0           | 0.415030311 | 0.605881983 | 0.693821065 | 0.130805123 | 0.291048646 | 0.388291761 | 1.174401691 | 1.099961171 | 3.267948225 |
| ENSMUSG000000040613 | -0.51294285  | 4.434024917  | 3.930281954 | 0.047423993 | 0.999071534 | Apobec1       | Apobec1       | APOBEC1  | 30.24759446 | 25.4947191  | 26.18756571 | 20.32895722 | 29.43115272 | 32.23363755 | 16.11410808 | 14.78364481 | 11.62816095 | 13.85610048 |
| ENSMUSG000000096449 | 2.371153055  | -0.980349335 | 3.926032943 | 0.047543974 | 0.999071534 | Gm4076        | Gm4076        | MT-ND5   | 0.070180034 | 0.177870133 | 0.269280881 | 0           | 0.130805123 | 0.072762162 | 0.064715293 | 1.174401691 | 1.492804447 | 0.130717929 |
| ENSMUSG000000035765 | -0.543850983 | 4.512108631  | 3.92433087  | 0.047592126 | 0.999071534 | Dym           | Dym           | DYM      | 23.29977114 | 34.15106558 | 26.92808814 | 26.22643628 | 29.16954247 | 29.6869619  | 17.27898336 | 22.03730231 | 7.85686551  | 15.62079252 |
| ENSMUSG000000035637 | -0.564061858 | 3.853671851  | 3.921526021 | 0.047671589 | 0.999071534 | Grhpr         | Grhpr         | GRHPR    | 19.36968926 | 24.13104807 | 13.80064517 | 14.01518552 | 17.72409419 | 13.75204853 | 11.06631518 | 12.50392388 | 6.678335683 | 12.61428015 |
| ENSMUSG000000022113 | 1.490718174  | 0.396510583  | 3.915519943 | 0.047842214 | 0.999071534 | Trim52        | Trim52        |          | 0.280720134 | 0.177870133 | 0.875162864 | 1.595788451 | 0.261610246 | 0.9459081   | 1.035444696 | 1.796143762 | 2.671334273 | 1.699333077 |
| ENSMUSG000000035566 | 1.591960142  | -0.235450451 | 3.908105648 | 0.048053734 | 0.999071534 | Pcdh17        | Pcdh17        | PCDH17   | 0.210540101 | 0.415030311 | 0.134640441 | 0.346910533 | 0.719428178 | 2.910486461 | 0.841298815 | 0.345412262 | 0.471411931 | 1.045743432 |
| ENSMUSG000000030615 | 0.499386898  | 5.073749986  | 3.9040919   | 0.048168653 | 0.999071534 | Tmem126a      | Tmem126a      | TMEM126A | 38.17793825 | 23.12311732 | 30.89998114 | 23.17362359 | 29.43115272 | 32.88849701 | 58.63205589 | 33.85040167 | 31.27032473 | 31.82981571 |
| ENSMUSG000000066026 | -0.533654279 | 4.053539518  | 3.898334869 | 0.04833399  | 0.999071534 | Dhrs3         | Dhrs3         | DHRS3    | 16.84320805 | 21.87802639 | 16.08953266 | 24.76941204 | 21.19042996 | 17.9722539  | 14.69037162 | 13.19474841 | 8.01400282  | 12.41820326 |
| ENSMUSG000000064342 | 1.330684911  | 1.693291669  | 3.897572506 | 0.04835593  | 0.999071534 | mt-Ti         | mt-Ti         |          | 0.771980369 | 1.363671021 | 2.760129034 | 2.914048475 | 1.308051232 | 1.309718907 | 0.776583522 | 2.763298096 | 8.878258026 | 6.078383699 |
| ENSMUSG000000040687 | 0.608073378  | 3.740426285  | 3.894650186 | 0.048440126 | 0.999071534 | Madd          | Madd          | MADD     | 14.87816711 | 10.19788764 | 9.020909526 | 9.574730704 | 10.92222779 | 21.97417278 | 12.23119047 | 9.049801264 | 16.42084892 | 17.77763835 |
| ENSMUSG000000031813 | -0.394883692 | 5.517751426  | 3.884066255 | 0.048746361 | 0.999071534 | Mvb12a        | Mvb12a        | MVB12A   | 55.02111463 | 50.51511783 | 58.09735015 | 55.64444945 | 49.70594681 | 47.14988067 | 39.86462078 | 35.85379279 | 28.99183373 | 40.39184006 |
| ENSMUSG000000051341 | 0.529974729  | 4.667814981  | 3.883921332 | 0.048750569 | 0.999071534 | Zfp52         | Zfp52         |          | 23.72085134 | 20.87009563 | 25.44704329 | 19.0800793  | 18.37811981 | 24.0115133  | 44.58883721 | 33.50498941 | 17.20653547 | 25.16320133 |
| ENSMUSG000000056492 | -0.552161776 | 4.725515427  | 3.883910958 | 0.04875087  | 0.999071534 | Gpr116        | Adgrf5        | ADGRF5   | 27.44039311 | 53.83536032 | 34.46795281 | 21.50845303 | 25.83401183 | 34.78031321 | 21.61490802 | 18.16868498 | 12.2567102  | 19.73840728 |
| ENSMUSG000000023087 | 0.92668776   | 11.32669115  | 3.8804505   | 0.048851448 | 0.999071534 | Ccrn4l        | Noct          | NOCT     | 1449.498413 | 983.4439666 | 2389.665861 | 3044.764364 | 1190.195816 | 1567.951819 | 1320.515563 | 2291.257699 | 6581.696238 | 3138.929629 |
| ENSMUSG000000036644 | -0.494563364 | 5.652181756  | 3.878662309 | 0.048903507 | 0.999071534 | Tbc1d9b       | Tbc1d9b       | TBC1D9B  | 66.39031173 | 82.17600155 | 46.3163116  | 43.22505238 | 68.28027431 | 74.79950204 | 36.17584905 | 39.86057503 | 21.92065477 | 36.79709702 |
| ENSMUSG000000026581 | -0.813771238 | 3.083664005  | 3.876496989 | 0.048966624 | 0.999071534 | Sell          | Sell          | SELL     | 18.94860906 | 10.13859759 | 7.337904017 | 9.713494917 | 9.287163747 | 8.003837767 | 10.03087049 | 5.526596192 | 1.807079067 | 4.836563373 |
| ENSMUSG000000054196 | 1.759953239  | 2.285433625  | 3.874857897 | 0.049014459 | 0.999071534 | Cthrc1        | Cthrc1        | CTHRC1   | 3.649361744 | 0.830060622 | 2.827449254 | 1.457024238 | 2.485297341 | 6.403070214 | 28.47472913 | 0.967154334 | 0.785686551 | 0.065358965 |
| ENSMUSG000000035237 | 1.169008192  | 1.517745293  | 3.858788675 | 0.049486044 | 0.999071534 | Lcat          | Lcat          | LCAT     | 1.824680872 | 1.660121243 | 2.625488593 | 0.20814632  | 2.550699902 | 2.255627007 | 1.68259763  | 4.144947144 | 4.714119306 | 4.836563373 |
| ENSMUSG000000053137 | 0.572364356  | 3.913191299  | 3.854911049 | 0.049600557 | 0.999071534 | Mapk11        | Mapk11        | MAPK11   | 18.66788892 | 13.04380977 | 8.280387102 | 8.325852786 | 14.51936867 | 21.97417278 | 17.47312924 | 16.37254122 | 13.8280833  | 17.32012559 |
| ENSMUSG000000019763 | 0.529912096  | 5.471992818  | 3.840792568 | 0.050019871 | 0.999071534 | Rmnd1         | Rmnd1         | RMND1    | 37.61649798 | 28.34064123 | 37.43004251 | 39.82532916 | 44.60454701 | 30.99668081 | 39.60575961 | 60.44714584 | 55.94088243 | 56.99301705 |
| ENSMUSG000000020427 | -0.571526545 | 8.922714855  | 3.840059764 | 0.050041738 | 0.999071534 | Igfbp3        | Igfbp3        | IGFBP3   | 465.9252427 | 794.6644652 | 678.7224615 | 537.225651  | 534.1427206 | 294.177419  | 382.143808  | 544.23156   | 303.1178714 | 334.7686162 |
| ENSMUSG000000081049 | -1.377164268 | 0.986109686  | 3.839278137 | 0.050065072 | 0.999071534 | Rps24-ps3     | Rps24-ps3     |          | 8.140883891 | 0.474320355 | 0.875162864 | 1.942698983 | 2.550699902 | 1.600767553 | 1.359021163 | 0.552659619 | 0.471411931 | 1.111102397 |
| ENSMUSG000000011837 | -0.533726782 | 4.624956719  | 3.838299616 | 0.0500943   | 0.999071534 | Snape2        | Snape2        | SNAPC2   | 28.91417382 | 25.79116932 | 33.92399105 | 31.15256584 | 30.73920395 | 33.4705943  | 16.95540689 | 17.54694291 | 8.32827744  | 24.64032962 |
| ENSMUSG000000083219 | 1.621428833  | 0.576472006  | 3.83711019  | 0.050129852 | 0.999071534 | Gm11410       | Gm11410       |          | 0.631620302 | 0.118580089 | 0.673202203 | 1.595788451 | 0.457817931 | 0.436572969 | 0.453007054 | 1.588896405 | 4.792687961 | 1.895409971 |

|                    |              |              |             |             |             |               |               |             |             |             |             |             |             |             |             |             |             |             |
|--------------------|--------------|--------------|-------------|-------------|-------------|---------------|---------------|-------------|-------------|-------------|-------------|-------------|-------------|-------------|-------------|-------------|-------------|-------------|
| ENSMUSG00000078612 | 0.879831612  | 1.710409313  | 3.83068916  | 0.050322238 | 0.999071534 | 1700024P16Rik | 1700024P16Rik | C1orf168    | 2.035220973 | 1.837991377 | 2.827449254 | 1.387642131 | 3.466335765 | 4.074681045 | 4.335924663 | 3.45412262  | 3.614158135 | 4.117614764 |
| ENSMUSG00000079053 | 1.642302755  | 0.706023934  | 3.82855464  | 0.050386365 | 0.999071534 | Gm14010       | Gm14010       |             | 0.350900168 | 0.355740266 | 2.01960661  | 0.277528426 | 0.850233301 | 0.291048646 | 0.388291761 | 1.519813953 | 4.714119306 | 3.267948225 |
| ENSMUSG00000096941 | 2.642054387  | -0.214077609 | 3.82254058  | 0.050567509 | 0.999071534 | Gm26720       | Gm26720       |             | 0.771980369 | 0           | 0.336601102 | 0           | 0           | 0.363810808 | 0.323576467 | 1.588896405 | 3.457020824 | 0           |
| ENSMUSG00000085385 | 0.473065716  | 4.428803598  | 3.820847611 | 0.050618625 | 0.999071534 | 9430008C03Rik | Snhg17        |             | 23.15941107 | 17.13482283 | 19.79214478 | 16.85985189 | 16.21983528 | 29.54143758 | 18.8968657  | 24.80060041 | 19.72073243 | 27.77755991 |
| ENSMUSG00000026915 | 0.499542529  | 4.797776669  | 3.81849816  | 0.050689654 | 0.999071534 | Strbp         | Strbp         | STRBP       | 20.91365    | 23.83459785 | 23.29279624 | 22.13289199 | 28.97333479 | 29.61419974 | 24.07408917 | 28.7383002  | 39.59860217 | 30.39191849 |
| ENSMUSG00000037022 | 0.632354918  | 3.950825816  | 3.808067299 | 0.051006273 | 0.999071534 | Mmaa          | Mmaa          | MMAA        | 12.07096577 | 12.74735955 | 15.48365068 | 8.325852786 | 14.06155074 | 10.33222694 | 15.27280926 | 17.13244819 | 18.38506529 | 26.3396627  |
| ENSMUSG00000028175 | 0.615143903  | 4.514485334  | 3.807386466 | 0.051027012 | 0.999071534 | Depdc1a       | Depdc1a       | DEPDC1      | 20.49256979 | 12.1544591  | 20.46534698 | 18.52502245 | 21.58284533 | 30.48734568 | 50.6073595  | 15.05997462 | 17.83508471 | 20.65343278 |
| ENSMUSG00000097248 | 1.283096582  | 0.931202556  | 3.801839517 | 0.051196309 | 0.999071534 | Gm2694        | Gm2694        |             | 0.98252047  | 0.177870133 | 1.817645949 | 1.942698983 | 0.39241537  | 3.274297269 | 1.553167044 | 1.4507315   | 3.064177549 | 2.810435474 |
| ENSMUSG00000090200 | 1.629658761  | 1.220177195  | 3.801755489 | 0.051198878 | 0.999071534 | 1700025N21Rik | 1700025N21Rik |             | 0.842160403 | 0.177870133 | 3.366011017 | 0.763203172 | 0.457817931 | 0.363810808 | 0.453007054 | 2.832380548 | 5.264099892 | 6.143742663 |
| ENSMUSG00000074024 | 1.255074415  | 0.83607839   | 3.795677295 | 0.05138508  | 0.999071534 | 4632427E13Rik | 4632427E13Rik |             | 0.421080201 | 0.889350666 | 2.288887492 | 0.763203172 | 0.719428178 | 1.236956746 | 1.164875283 | 3.730452429 | 2.907040239 | 1.830051006 |
| ENSMUSG00000042988 | -0.920822925 | 2.305898612  | 3.794037609 | 0.051435434 | 0.999071534 | Notum         | Notum         | NOTUM       | 8.842684226 | 9.604987194 | 3.500651458 | 6.521918016 | 4.185763942 | 1.45524323  | 2.265035272 | 4.144947144 | 3.299883514 | 4.13691657  |
| ENSMUSG00000089940 | 0.825681377  | 4.347027321  | 3.793995914 | 0.051436715 | 0.999071534 | Gm4117        | Gm4117        |             | 10.59718506 | 10.13859759 | 19.11894258 | 21.57783514 | 13.60373281 | 10.55051342 | 10.80745401 | 21.48464269 | 43.68417223 | 29.54225196 |
| ENSMUSG00000024097 | 0.564143082  | 7.690902524  | 3.793066084 | 0.051465293 | 0.999071534 | Srsf7         | Srsf7         | SRSF7       | 192.7143721 | 109.9237423 | 201.0854982 | 188.3724193 | 170.8314909 | 220.3965873 | 295.9430371 | 156.2645073 | 268.7048004 | 225.7498634 |
| ENSMUSG00000015711 | -0.534241056 | 4.837101723  | 3.792771849 | 0.05147434  | 0.999071534 | Prune         | Prune         | PRUNE1      | 39.51135888 | 50.3372477  | 25.64900395 | 26.15705417 | 33.94392947 | 36.23555644 | 22.90921389 | 25.00784777 | 9.663944577 | 22.61420172 |
| ENSMUSG00000021298 | -1.058584051 | 1.909223711  | 3.787074641 | 0.051649844 | 0.999071534 | Gpr132        | Gpr132        | GPRI32      | 12.07096577 | 4.624623464 | 3.769932339 | 1.595788451 | 3.662543449 | 4.365729691 | 2.070898391 | 2.486968286 | 0.785686551 | 2.156845829 |
| ENSMUSG00000038225 | 0.642342154  | 3.964600942  | 3.786939442 | 0.051654016 | 0.999071534 | Ccdc111       | Primpol       | PRIMPOL     | 13.61492651 | 11.0872383  | 11.17515658 | 9.85225913  | 17.33167882 | 12.80614043 | 10.28973166 | 20.310241   | 21.37067419 | 23.39850929 |
| ENSMUSG00000083594 | 0.717172912  | 4.628245968  | 3.779048889 | 0.051898153 | 0.999071534 | Gm13722       | Gm13722       |             | 19.93112953 | 11.97658897 | 29.75553739 | 16.44355925 | 18.50892493 | 16.29872418 | 13.33135046 | 28.8764651  | 38.10579772 | 44.64017276 |
| ENSMUSG00000059439 | -0.71670019  | 3.206691715  | 3.778149825 | 0.051926048 | 0.999071534 | Bcas3         | Bcas3         | BCAS3       | 12.98330621 | 14.11103057 | 9.155549966 | 12.28063286 | 10.13739705 | 14.84348095 | 4.983077598 | 6.493750525 | 4.399844685 | 4.117614764 |
| ENSMUSG00000024053 | -0.66087917  | 6.409375566  | 3.776745026 | 0.051969665 | 0.999071534 | Emilin2       | Emilin2       | EMILIN2     | 139.5880867 | 175.2020812 | 64.42545087 | 75.90402456 | 87.77023766 | 115.328026  | 71.96340635 | 60.17081604 | 17.44224143 | 70.26088684 |
| ENSMUSG00000070985 | 1.786796296  | -0.516538524 | 3.772946604 | 0.052087797 | 0.999071534 | Acnat1        | Acnat1        |             | 0.210540101 | 0.118580089 | 0.673202203 | 0.20814632  | 0.130805123 | 0.218286485 | 0.388291761 | 0.552659619 | 1.571373102 | 1.372538255 |
| ENSMUSG00000038175 | -0.842199597 | 2.642526712  | 3.772796994 | 0.052092456 | 0.999071534 | Myliip        | Myliip        | MYLIP       | 6.175842952 | 14.94109119 | 6.328100712 | 5.550568524 | 7.848307392 | 6.039259406 | 5.75966112  | 5.18118393  | 2.749902928 | 1.764692042 |
| ENSMUSG00000019558 | -0.502632869 | 6.97372918   | 3.771868801 | 0.052121369 | 0.999071534 | Slc6a8        | Slc6a8        | AC136616.1  | 145.2726694 | 222.8119869 | 142.4495862 | 108.5136146 | 148.5292174 | 155.419977  | 80.3763945  | 126.3518054 | 65.21198373 | 86.20847418 |
| ENSMUSG00000064340 | 1.354557165  | 2.93546275   | 3.766870963 | 0.052277342 | 0.999071534 | mt-Tl1        | mt-Tl1        |             | 1.754500839 | 0.830060622 | 9.626791509 | 6.521918016 | 3.008517833 | 2.619437815 | 2.523896446 | 8.22081835  | 25.77051887 | 7.516280918 |
| ENSMUSG00000034349 | 0.551071836  | 7.907840402  | 3.747851701 | 0.052875429 | 0.999071534 | Smc4          | Smc4          | SMC4        | 188.5737501 | 154.9841761 | 239.1887429 | 207.730027  | 218.8369711 | 290.0299758 | 283.3235549 | 190.874816  | 350.573339  | 232.4164778 |
| ENSMUSG00000030167 | -0.75996019  | 3.008212349  | 3.744459876 | 0.052982849 | 0.999071534 | Klrc1         | Klrc1         | KLRC4-KLRK1 | 13.40438641 | 10.07930755 | 10.16535327 | 10.6154623  | 7.325086899 | 12.44232962 | 5.824376413 | 4.62852431  | 2.042785033 | 5.163358196 |
| ENSMUSG00000024913 | -0.563949266 | 5.412352837  | 3.744021071 | 0.052996762 | 0.999071534 | Lrp5          | Lrp5          | LRP5        | 52.98592532 | 89.70583719 | 32.31370576 | 31.36071216 | 58.66609775 | 53.77123736 | 27.63343032 | 35.16296827 | 17.44224143 | 36.99317391 |
| ENSMUSG00000020911 | 2.029692097  | 3.031593477  | 3.741170526 | 0.053087243 | 0.999071534 | Krt19         | Krt19         | KRT19       | 0           | 4.446753331 | 9.89607239  | 1.248877918 | 0.719428178 | 61.99336162 | 0.517722348 | 7.875399573 | 0.864255206 | 2.483640651 |
| ENSMUSG00000025791 | -0.643186141 | 6.362324614  | 3.740920651 | 0.053095183 | 0.999071534 | Pgm2          | Pgm2          |             | 81.68955904 | 180.5974753 | 77.68753427 | 68.13322863 | 114.9123007 | 54.93543195 | 37.27600904 | 109.7029344 | 32.68456052 | 75.35888607 |
| ENSMUSG00000064368 | 1.120155055  | 11.15647488  | 3.7331418   | 0.053342969 | 0.999071534 | mt-Nd6        | mt-Nd6        | MT-ND6      | 843.6341832 | 464.1817577 | 2380.779592 | 2688.695393 | 949.4489867 | 873.0004139 | 870.8737044 | 2281.240743 | 6643.215494 | 2919.25815  |
| ENSMUSG00000071714 | -0.63813597  | 3.90256116   | 3.728287611 | 0.053498213 | 0.999071534 | Csf2rb2       | Csf2rb2       | CSF2RB      | 29.61597415 | 24.01246798 | 16.96469553 | 12.00310443 | 11.64165596 | 20.51892955 | 11.06631518 | 9.740625788 | 6.364061063 | 10.52279329 |
| ENSMUSG00000022816 | 0.92086209   | 5.520326552  | 3.727721903 | 0.053516337 | 0.999071534 | Fstl1         | Fstl1         | FSTL1       | 49.61728371 | 26.62122994 | 44.29670498 | 15.68035608 | 29.30034759 | 90.73441542 | 148.2627374 | 12.98750105 | 18.07079067 | 34.11737947 |
| ENSMUSG00000022817 | -0.479402845 | 7.004917686  | 3.727046797 | 0.053537973 | 0.999071534 | Itgb5         | Itgb5         | ITGB5       | 145.4130295 | 188.0087308 | 144.805794  | 149.7265859 | 147.7443866 | 169.390312  | 83.09443683 | 127.2498773 | 67.25476876 | 84.57450007 |
| ENSMUSG00000057359 | 0.624132313  | 3.6204325    | 3.7244165   | 0.05362236  | 0.999071534 | Gm17494       | Gm17494       |             | 9.895384729 | 6.640484974 | 10.29999371 | 12.62754339 | 10.00659192 | 10.47775126 | 16.8259763  | 12.15851162 | 15.55659371 | 14.50969012 |
| ENSMUSG00000058748 | 0.687094404  | 3.178814402  | 3.723002454 | 0.053667785 | 0.999071534 | Zfp958        | Zfp958        | ZNF788      | 6.947823321 | 8.537766395 | 4.847055865 | 7.562649614 | 7.586697145 | 9.677367482 | 15.98467749 | 11.39860464 | 9.113963991 | 6.601255415 |
| ENSMUSG00000046718 | -0.418519065 | 6.636620308  | 3.722539858 | 0.053682654 | 0.999071534 | Bst2          | Bst2          | BST2        | 125.9029802 | 133.3433099 | 110.9437231 | 98.59197341 | 123.0222184 | 109.0704801 | 81.86484625 | 96.92268071 | 51.46246909 | 78.49611637 |
| ENSMUSG00000025878 | 0.406562854  | 5.388127268  | 3.720477473 | 0.053748999 | 0.999071534 | Uimc1         | Uimc1         | UIMC1       | 36.63397751 | 39.60574966 | 38.17056493 | 31.29133005 | 41.07280868 | 43.00243746 | 45.36542073 | 44.48909934 | 42.3485051  | 52.22181264 |
| ENSMUSG00000086526 | 1.254148314  | 1.436797525  | 3.7192174   | 0.053789577 | 0.999071534 | Gm12762       | Gm12762       |             | 2.17558104  | 1.363671021 | 3.029409915 | 0.416292639 | 1.046440986 | 1.236956746 | 2.006174098 | 1.865226215 | 7.306884924 | 3.856178906 |
| ENSMUSG00000092905 | 1.207968595  | 3.08918154   | 3.7183034   | 0.05381903  | 0.999071534 | Gm25735       | Gm25735       |             | 3.930081878 | 2.134441599 | 8.415027543 | 9.158438064 | 2.289089656 | 2.40115133  | 2.523896446 | 13.88557293 | 22.3920667  | 10.26135743 |
| ENSMUSG00000032291 | 1.051659146  | 3.482774663  | 3.716479617 | 0.053877853 | 0.999071534 | Crabp1        | Crabp1        | CRABP1      | 5.263502516 | 10.5536279  | 8.280387102 | 5.203657991 | 8.109917638 | 31.50601594 | 33.84609849 | 5.319348834 | 3.221314859 | 3.594743048 |

|                    |              |              |             |             |             |               |           |           |             |             |             |             |             |             |             |             |             |             |
|--------------------|--------------|--------------|-------------|-------------|-------------|---------------|-----------|-----------|-------------|-------------|-------------|-------------|-------------|-------------|-------------|-------------|-------------|-------------|
| ENSMUSG00000049562 | -0.846639398 | 2.120838113  | 3.714426287 | 0.05394416  | 0.999071534 | Ap5b1         | Ap5b1     | AP5B1     | 4.491522147 | 7.944865951 | 4.039213221 | 4.509836926 | 7.194281776 | 5.457162114 | 2.006174098 | 2.625133191 | 2.907040239 | 1.830051006 |
| ENSMUSG00000062563 | 1.118437644  | 1.071794628  | 3.712427788 | 0.05400878  | 0.999071534 | Cys1          | Cys1      | CYS1      | 0.631620302 | 1.304380977 | 1.144443746 | 1.665170557 | 1.700466601 | 1.309718907 | 1.617882337 | 1.796143762 | 3.69272679  | 4.117614764 |
| ENSMUSG00000033543 | 0.534699295  | 6.55772617   | 3.710815217 | 0.054060981 | 0.999071534 | Gtf2a2        | Gtf2a2    | GTf2A2    | 80.21577834 | 52.23452912 | 96.20059487 | 93.38831541 | 75.08214071 | 71.74349126 | 130.7896081 | 91.32700206 | 125.7098482 | 100.7181643 |
| ENSMUSG00000022661 | -0.401071966 | 5.199960452  | 3.70481077  | 0.054255823 | 0.999071534 | Cd200         | Cd200     | CD200     | 42.59928036 | 45.41617402 | 42.00781749 | 43.50258081 | 42.70787272 | 36.96317805 | 35.26983495 | 23.90252853 | 25.22053829 | 31.96053364 |
| ENSMUSG00000038742 | 1.433241383  | 0.035531569  | 3.701975779 | 0.054348076 | 0.999071534 | Angptl6       | Angptl6   | ANGPTL6   | 0.421080201 | 0.711480533 | 0.403921322 | 0.138764213 | 0.850233301 | 0.582097292 | 0.711868228 | 1.4507315   | 1.099961171 | 2.352922722 |
| ENSMUSG00000059248 | -0.513836372 | 7.990621986  | 3.701364933 | 0.054367975 | 0.999071534 | 9-Sep         | 9-Sep     | 9-Sep     | 320.091133  | 316.9052874 | 346.2278932 | 273.4348819 | 297.1238373 | 337.0343322 | 153.3752455 | 168.2157716 | 133.6452823 | 249.7366034 |
| ENSMUSG00000028756 | -0.544257565 | 4.789260111  | 3.700164116 | 0.054407116 | 0.999071534 |               |           |           | 31.86173523 | 35.98905696 | 25.31240285 | 41.76802814 | 33.87852691 | 18.48158903 | 12.55476693 | 27.77114586 | 17.6779474  | 30.39191849 |
| ENSMUSG00000046337 | -1.739237781 | 0.821641113  | 3.696076806 | 0.054540567 | 0.999071534 | Fam178b       | Fam178b   | FAM178B   | 8.140883891 | 4.209593153 | 0.403921322 | 0.20814632  | 0.261610246 | 0.654859454 | 0.129430587 | 1.174401691 | 0.549980586 | 1.045743432 |
| ENSMUSG00000047878 | -0.56025345  | 3.993353342  | 3.69427384  | 0.054599544 | 0.999071534 | A4galt        | A4galt    | A4GALT    | 19.79076946 | 25.79116932 | 16.76273487 | 18.10872981 | 17.33167882 | 20.59169171 | 14.62565633 | 12.64208879 | 7.306884924 | 8.431306421 |
| ENSMUSG00000079427 | 0.599513566  | 4.603895378  | 3.685376642 | 0.054891573 | 0.999071534 | Gm2382        | Mthfs1    | MTHF5     | 21.89617047 | 16.12689208 | 15.41633046 | 22.13289199 | 24.19894779 | 13.75204853 | 33.06951497 | 31.84701055 | 32.21314859 | 24.37889376 |
| ENSMUSG00000031616 | -0.437411506 | 5.63070688   | 3.682823518 | 0.054975678 | 0.999071534 | Ednra         | Ednra     | EDNRA     | 46.038102   | 73.34178493 | 51.16336746 | 64.52535909 | 59.45092849 | 64.24898862 | 42.25908664 | 37.02819448 | 22.78490998 | 42.81012175 |
| ENSMUSG00000023905 | 0.52682455   | 7.421567742  | 3.674934255 | 0.055236432 | 0.999071534 | Tnfrsf12a     | Tnfrsf12a | TNFRSF12A | 160.7122768 | 108.8565215 | 155.0384674 | 122.1818896 | 184.239016  | 192.4559172 | 313.4161663 | 163.1036701 | 152.0303476 | 156.0118483 |
| ENSMUSG00000096463 | 1.788946039  | 1.246625481  | 3.674115171 | 0.055263579 | 0.999071534 | Gm21750       | Gm21750   |           | 0.491260235 | 0.474320355 | 0.807842644 | 1.387642131 | 2.158284533 | 0.291048646 | 0           | 3.246875263 | 9.192532646 | 2.287563758 |
| ENSMUSG00000006014 | 1.388861883  | 0.293321786  | 3.672484356 | 0.055317672 | 0.999071534 | Prg4          | Prg4      | PRG4      | 0.491260235 | 0.237160178 | 1.077123525 | 0.763203172 | 0.588623054 | 0.509335131 | 0.841298815 | 1.381649048 | 2.435628308 | 2.156845829 |
| ENSMUSG00000029070 | -0.444527918 | 6.65346029   | 3.672137185 | 0.055329195 | 0.999071534 | Mxra8         | Mxra8     | MXRA8     | 97.05898639 | 162.9883321 | 102.2594147 | 125.9285234 | 112.5578085 | 112.5630639 | 88.91881324 | 73.02015218 | 52.3267243  | 92.87508856 |
| ENSMUSG00000061330 | 0.587939032  | 8.788971829  | 3.671498462 | 0.055350401 | 0.999071534 | Gm11361       | Gm11361   |           | 313.1433097 | 347.4396602 | 336.3318208 | 353.0161581 | 347.3530046 | 251.1022194 | 636.3454808 | 552.176042  | 474.0046962 | 389.6701464 |
| ENSMUSG00000085328 | 0.625683305  | 4.54225319   | 3.670690887 | 0.055377225 | 0.999071534 | Gm17131       | Gm17131   |           | 16.42212785 | 15.83044186 | 21.87907161 | 16.30479504 | 24.32975291 | 16.29872418 | 14.56094103 | 31.84701055 | 26.87048004 | 42.352609   |
| ENSMUSG00000031669 | 0.951951738  | 2.347166585  | 3.667573057 | 0.055480915 | 0.999071534 | Gins3         | Gins3     | GIN3      | 4.491522147 | 2.786632087 | 3.029409915 | 3.260959008 | 3.989556257 | 12.15128097 | 12.16647517 | 1.865226215 | 2.357059653 | 4.836563373 |
| ENSMUSG00000025128 | -0.719195497 | 4.060333185  | 3.666180477 | 0.055527295 | 0.999071534 | Bhlhe22       | Bhlhe22   | BHLHE22   | 26.66841275 | 15.53399163 | 20.5326672  | 23.45115201 | 20.53640434 | 24.52084843 | 16.37296925 | 3.385040167 | 10.52819978 | 7.843075741 |
| ENSMUSG00000028949 | 0.537483809  | 5.0199705    | 3.665477849 | 0.055550712 | 0.999071534 | Smarcd3       | Smarcd3   | SMARCD3   | 24.98409194 | 20.1586151  | 33.12154841 | 26.71211102 | 31.78564494 | 25.75780518 | 24.33295035 | 41.17314163 | 43.36989761 | 43.98658311 |
| ENSMUSG00000097468 | 1.18818638   | 0.883471014  | 3.664516487 | 0.055582768 | 0.999071534 | 2310010G23Rik | Mdrl      |           | 0.561440268 | 0.355740266 | 1.211763966 | 1.526406344 | 1.765869163 | 1.746291877 | 2.523896446 | 0.967154334 | 3.064177549 | 2.941153403 |
| ENSMUSG00000051375 | -0.511199296 | 4.700642212  | 3.663087893 | 0.055630441 | 0.999071534 | Pcdh1         | Pcdh1     | PCDH1     | 28.70363372 | 44.94185366 | 24.23527932 | 24.00620887 | 36.69083706 | 36.96317805 | 20.38531745 | 20.79381817 | 12.09957289 | 16.60117698 |
| ENSMUSG00000061723 | -1.586831963 | 1.86835984   | 3.659730491 | 0.055742649 | 0.999071534 | Tnnt3         | Tnnt3     | TNNT3     | 16.00104765 | 1.245090933 | 8.751628644 | 0.485674746 | 1.308051232 | 0.509335131 | 0.19414588  | 2.279720929 | 2.199922343 | 2.810435474 |
| ENSMUSG00000036036 | 0.88769867   | 2.796015906  | 3.65903393  | 0.055765959 | 0.999071534 | Zfp57         | Zfp57     | ZFP57     | 4.070441945 | 3.794562842 | 6.597381593 | 4.02416218  | 6.409451036 | 4.729540499 | 2.718042326 | 11.05319238 | 10.68537309 | 11.76461361 |
| ENSMUSG00000049299 | -0.41360101  | 5.574440797  | 3.65535945  | 0.055889094 | 0.999071534 | Trappc1       | Trappc1   | TRAPPC1   | 62.24968975 | 44.64540344 | 64.02152955 | 56.47703473 | 54.21872356 | 49.47826984 | 47.24216424 | 37.64993655 | 22.78490998 | 43.2676345  |
| ENSMUSG00000097113 | 1.041919041  | 2.184760581  | 3.645660874 | 0.056215489 | 0.999071534 | Gm19705       | Gm19705   |           | 1.19306057  | 3.083082309 | 2.221567271 | 4.579219032 | 3.793348573 | 1.309718907 | 4.27120937  | 6.839162787 | 5.264099892 | 9.999921569 |
| ENSMUSG00000056529 | -0.758831969 | 3.067682322  | 3.645407409 | 0.056224047 | 0.999071534 | Ptafr         | Ptafr     | PTAFR     | 12.70258607 | 14.94109119 | 9.82875217  | 6.730064335 | 9.941189363 | 10.76879991 | 9.189571674 | 4.075864691 | 2.278490998 | 4.705845444 |
| ENSMUSG00000097296 | 0.864657979  | 3.207245709  | 3.641672625 | 0.056350296 | 0.999071534 | Gm26532       | Gm26532   |           | 5.75476275  | 4.387463286 | 8.684308424 | 8.950291745 | 5.493815174 | 4.29296753  | 5.500799946 | 13.60924312 | 11.47102364 | 19.80376624 |
| ENSMUSG00000058571 | -0.449758819 | 5.35613575   | 3.640532267 | 0.056388904 | 0.999071534 | Gpc6          | Gpc6      | GPC6      | 37.75685805 | 61.89880636 | 48.60519909 | 48.49809248 | 47.61306484 | 48.75064822 | 26.01554798 | 24.45518815 | 34.72734555 | 33.46378983 |
| ENSMUSG00000022594 | -0.58909533  | 3.764649968  | 3.638774776 | 0.056448461 | 0.999071534 | Lynx1         | Lynx1     |           | 11.15862533 | 25.61329918 | 13.26208341 | 16.929234   | 16.87386089 | 13.53376204 | 9.901439902 | 11.53676955 | 6.128355098 | 11.69925465 |
| ENSMUSG00000021390 | -0.639495864 | 6.914764194  | 3.63695721  | 0.056510124 | 0.999071534 | Ogn           | Ogn       | OGN       | 58.38978791 | 149.7073621 | 126.3600536 | 187.2623056 | 237.7383114 | 87.31459383 | 52.6135336  | 105.6961522 | 91.45391453 | 110.6527269 |
| ENSMUSG00000021692 | 0.551449551  | 4.382298052  | 3.63621204  | 0.056535425 | 0.999071534 | Dimt1         | Dimt1     | DIMT1     | 20.00130956 | 15.05967128 | 14.94508892 | 16.929234   | 20.47100178 | 25.17570789 | 41.54721841 | 21.48464269 | 16.9708295  | 14.50969012 |
| ENSMUSG00000020526 | 0.595244317  | 4.607320904  | 3.635825612 | 0.056548551 | 0.999071534 | Znhit3        | Znhit3    | ZNHIT3    | 24.00157147 | 13.63671021 | 23.22547602 | 17.41490874 | 22.17146838 | 20.00959442 | 44.32997603 | 21.69189005 | 32.29171725 | 18.69266385 |
| ENSMUSG00000098019 | -1.463035271 | 0.589035706  | 3.635715341 | 0.056552297 | 0.999071534 | Gm2546        | Gm2546    |           | 0.701800335 | 2.430891821 | 3.366011017 | 0.971349492 | 2.943115272 | 0.727621615 | 0.258861174 | 1.4507315   | 0           | 1.111102397 |
| ENSMUSG00000047648 | 0.423186544  | 5.827861608  | 3.633244619 | 0.0566363   | 0.999071534 | Fbxo30        | Fbxo30    | FBXO30    | 41.96766006 | 54.78400103 | 46.78755314 | 47.38797877 | 60.6281746  | 60.02878326 | 56.75531238 | 85.31682871 | 51.77674371 | 57.18909394 |
| ENSMUSG00000075705 | -0.434735586 | 6.170857795  | 3.626885677 | 0.05685311  | 0.999071534 | Msrb1         | Msrb1     | MSRB1     | 101.5505085 | 86.74133497 | 80.38034309 | 84.36864156 | 76.19398426 | 86.07763708 | 78.88794275 | 49.32487101 | 32.99883514 | 56.40478637 |
| ENSMUSG00000070495 | 1.17233057   | 3.75038124   | 3.623526339 | 0.056968003 | 0.999071534 | Ctcf1         | Ctcf1     | CTCF1     | 3.438821644 | 4.921073686 | 12.92548231 | 16.16603083 | 4.316569065 | 4.947826984 | 4.206494076 | 9.947873145 | 42.03423048 | 18.88874074 |
| ENSMUSG00000025479 | 1.839296647  | -0.280816507 | 3.620201824 | 0.057081948 | 0.999071534 | Cyp2e1        | Cyp2e1    | CYP2E1    | 0.070180034 | 0           | 0.942483085 | 0.346910533 | 0.196207685 | 0.654859454 | 0.647152935 | 0.345412262 | 1.178529826 | 2.352922722 |
| ENSMUSG00000073702 | 0.626330588  | 8.419421837  | 3.616942264 | 0.057193902 | 0.999071534 | Rpl31         | Rpl31     |           | 195.5215734 | 255.6586715 | 350.6037075 | 300.6326677 | 289.7987504 | 188.3812362 | 411.912843  | 501.9530991 | 449.4912758 | 373.2650463 |

|                     |              |              |             |             |             |               |               |               |  |             |             |             |             |             |             |             |             |             |             |
|---------------------|--------------|--------------|-------------|-------------|-------------|---------------|---------------|---------------|--|-------------|-------------|-------------|-------------|-------------|-------------|-------------|-------------|-------------|-------------|
| ENSMUSG00000084283  | 1.626090587  | 0.078685412  | 3.616381868 | 0.057213172 | 0.999071534 | Gm14914       | Gm14914       |               |  | 0.350900168 | 0.5336104   | 0.471241542 | 0.624438959 | 0.39241537  | 0.436572969 | 0.064715293 | 1.105319238 | 2.592765618 | 2.22204793  |
| ENSMUSG00000050212  | -0.443231796 | 4.860182257  | 3.615364404 | 0.057248179 | 0.999071534 | Eva1b         | Eva1b         | EVA1B         |  | 36.42343741 | 26.91768016 | 36.4202392  | 37.18880911 | 35.77520119 | 36.01726995 | 26.66270091 | 22.65904439 | 14.14235792 | 22.02597104 |
| ENSMUSG000000051747 | -1.774104948 | 0.937706278  | 3.615284623 | 0.057250925 | 0.999071534 | Ttn           | Ttn           | TTN           |  | 6.667103186 | 0.415030311 | 6.328100712 | 0           | 1.046440986 | 0.363810808 | 0.323576467 | 0.898071881 | 0.392843275 | 1.830051006 |
| ENSMUSG000000051498 | -0.691109936 | 3.203362698  | 3.614618705 | 0.057273849 | 0.999071534 | Tlr6          | Tlr6          | TLR6          |  | 14.17636678 | 14.11103057 | 5.385617627 | 13.46012867 | 10.98763035 | 7.858313444 | 6.406814054 | 9.187966168 | 4.16413872  | 6.209101628 |
| ENSMUSG000000071711 | -0.434266458 | 5.1021418    | 3.609156864 | 0.057462245 | 0.999071534 | Mpst          | Mpst          | MPST          |  | 37.54631794 | 35.87047687 | 37.69932339 | 45.23713347 | 47.41685716 | 26.26714031 | 28.86302089 | 36.1301226  | 21.44924284 | 27.12397027 |
| ENSMUSG000000022584 | -1.090081575 | 2.229163739  | 3.605630801 | 0.057584219 | 0.999071534 | Ly6c2         | Ly6c2         |               |  | 11.9306057  | 4.150303108 | 6.126140051 | 3.607869541 | 6.605658721 | 8.14936209  | 3.235764674 | 0.967154334 | 0.392843275 | 2.679717545 |
| ENSMUSG000000030352 | -0.428878122 | 5.642074782  | 3.604775343 | 0.057613853 | 0.999071534 | Tspan9        | Tspan9        | TSPAN9        |  | 61.61806945 | 81.5831011  | 51.70192922 | 50.99584831 | 51.40641341 | 65.12213456 | 45.17127485 | 39.30791541 | 24.43485174 | 37.12389184 |
| ENSMUSG000000050350 | -1.555928879 | -0.534747845 | 3.600768995 | 0.057752851 | 0.999071534 | Gpr18         | Gpr18         | GPRI8         |  | 1.403600671 | 1.067220799 | 0.471241542 | 0.693821065 | 0.654025616 | 0.582097292 | 0.129430587 | 0.207247357 | 0.078568655 | 0.392153787 |
| ENSMUSG000000097193 | 1.949745525  | -0.220412258 | 3.59691126  | 0.057887029 | 0.999071534 | Gm26664       | Gm26664       |               |  | 0           | 0.059290044 | 0.269280881 | 0.832585279 | 0.39241537  | 0.291048646 | 0.129430587 | 1.796143762 | 2.199922343 | 0.915025503 |
| ENSMUSG000000042354 | 0.445844765  | 6.855206397  | 3.595197979 | 0.057946726 | 0.999071534 | GnI3          | GnI3          | GNI3          |  | 105.7613105 | 89.5872571  | 120.0992731 | 92.34758382 | 100.7199449 | 129.1528367 | 158.1641773 | 92.4323213  | 123.1170825 | 136.208082  |
| ENSMUSG000000042063 | 0.520972464  | 4.116437343  | 3.590051696 | 0.058126435 | 0.999071534 | Zfp386        | Zfp386        |               |  | 13.05348624 | 15.23754141 | 10.38855548 | 13.52951078 | 20.92881971 | 17.24463228 | 23.36222095 | 20.58657081 | 16.57798623 | 19.34625349 |
| ENSMUSG000000026480 | -0.453369293 | 5.60246052   | 3.587483366 | 0.058216343 | 0.999071534 | Ncf2          | Ncf2          | NCF2          |  | 80.84739864 | 47.90635588 | 43.96010388 | 60.57057902 | 57.68505933 | 57.19105896 | 47.37159483 | 30.81077377 | 22.07779208 | 45.55519826 |
| ENSMUSG000000079262 | 1.256197004  | 0.37928928   | 3.586891765 | 0.058237073 | 0.999071534 | Sko1a6        | Sko1a6        | SLCO1A2       |  | 0.631620302 | 0.711480533 | 0.403921322 | 0.763203172 | 1.111843547 | 1.600767553 | 1.03544696  | 1.105319238 | 3.064177549 | 0.915025503 |
| ENSMUSG000000037049 | -0.505072893 | 4.482916537  | 3.584152739 | 0.058333156 | 0.999071534 | Smpd1         | Smpd1         | SMPD1         |  | 28.63345369 | 36.75982753 | 17.30129663 | 26.78149313 | 26.03021952 | 20.73721603 | 24.52709623 | 17.06336574 | 10.76390575 | 16.86261284 |
| ENSMUSG000000022422 | 0.739227301  | 3.604182091  | 3.583060848 | 0.058371505 | 0.999071534 | Dscc1         | Dscc1         | DSCC1         |  | 11.43934547 | 8.241316173 | 10.50195437 | 6.868828548 | 9.941189363 | 24.37532411 | 22.90921389 | 4.766689215 | 14.22092657 | 7.843075741 |
| ENSMUSG000000033706 | 0.494256772  | 4.610304453  | 3.581338173 | 0.058432064 | 0.999071534 | Smyd5         | Smyd5         | SMYD5         |  | 19.08896912 | 20.98867572 | 30.22677893 | 12.62754339 | 22.23687094 | 37.54527535 | 25.30367975 | 22.45179703 | 26.47763677 | 26.07822684 |
| ENSMUSG000000024056 | 0.479575075  | 4.970999468  | 3.57907554  | 0.058511705 | 0.999071534 | Ndc80         | Ndc80         | NDC80         |  | 30.10723439 | 18.61707394 | 31.64050356 | 20.67586775 | 34.92496789 | 40.23747532 | 40.64120431 | 31.22526848 | 37.32011117 | 24.70568858 |
| ENSMUSG000000003429 | 0.566395745  | 9.448257546  | 3.575245736 | 0.058646771 | 0.999071534 | Rps11         | Rps11         | RPS11         |  | 519.9638685 | 567.7614652 | 574.2414795 | 613.407204  | 644.019024  | 475.1369147 | 1117.503688 | 913.7535978 | 769.737114  | 645.6158514 |
| ENSMUSG000000009545 | -0.710589845 | 3.342747085  | 3.575211946 | 0.058647964 | 0.999071534 | Kcnq1         | Kcnq1         | KCNQ1         |  | 11.2989854  | 18.49849386 | 7.001302916 | 13.04383603 | 14.71557636 | 8.367648575 | 12.61948223 | 5.18118393  | 3.299883514 | 7.97379367  |
| ENSMUSG000000025956 | 0.506269352  | 4.240609472  | 3.573252853 | 0.058717185 | 0.999071534 | Mettl21a      | Mettl21a      | METTL21A      |  | 15.65014748 | 15.8897319  | 12.52156098 | 16.65170557 | 19.81697616 | 18.19054038 | 23.75051271 | 17.82327272 | 22.3920667  | 22.2874069  |
| ENSMUSG000000093760 | 1.013339406  | 2.744839249  | 3.568672759 | 0.058879354 | 0.999071534 | Gm20678       | Gm20678       |               |  | 6.526743119 | 2.727342043 | 7.80914556  | 2.22022741  | 3.531738326 | 4.220205368 | 4.27120937  | 5.457513739 | 18.22792798 | 6.862691273 |
| ENSMUSG000000028995 | 0.460177116  | 6.196662996  | 3.56842634  | 0.058888093 | 0.999071534 | Fam126a       | Fam126a       | FAM126A       |  | 49.19620351 | 56.26625214 | 64.82937219 | 64.24783066 | 85.35034288 | 72.90768585 | 74.68144868 | 71.29309087 | 95.61805325 | 85.09737179 |
| ENSMUSG000000039813 | 0.784032351  | 2.250253327  | 3.566387879 | 0.058960434 | 0.999071534 | Tbc1d2        | Tbc1d2        | TBC1D2        |  | 4.140621979 | 3.142372354 | 3.837252559 | 2.497755836 | 4.120361381 | 6.257545891 | 2.847472913 | 6.700997882 | 6.128355098 | 6.013024734 |
| ENSMUSG000000026051 | 1.352111651  | 2.81330325   | 3.564853713 | 0.05901494  | 0.999071534 | 1500015O10Rik | 1500015O10Rik | C2orf40       |  | 9.053224327 | 1.304380977 | 6.126140051 | 2.081463196 | 1.700466601 | 6.912405345 | 34.81682789 | 2.556050739 | 2.357059653 | 2.352922722 |
| ENSMUSG000000002825 | 0.637569848  | 3.221862708  | 3.56429136  | 0.059034933 | 0.999071534 | Qtrt1         | Qtrt1         | QTRT1         |  | 8.91286426  | 6.284744707 | 9.694111729 | 4.579219032 | 8.109917638 | 12.58785394 | 13.59021163 | 7.737234668 | 8.092571475 | 12.54892118 |
| ENSMUSG000000033065 | -0.53210599  | 5.240534621  | 3.561493105 | 0.059134525 | 0.999071534 | Pfkm          | Pfkm          | PFKM          |  | 44.42396123 | 57.15560281 | 35.0738348  | 38.22954071 | 57.29264396 | 41.9837672  | 24.52709623 | 38.20259617 | 10.60676844 | 38.23499424 |
| ENSMUSG000000092974 | 1.445226696  | 4.103499827  | 3.559053752 | 0.059221489 | 0.999071534 | Gm25072       | Gm25072       |               |  | 3.649361744 | 1.363671021 | 20.80194809 | 16.51294136 | 4.381971627 | 3.565345915 | 1.359021163 | 20.24115855 | 50.20537061 | 33.46378983 |
| ENSMUSG000000030249 | -0.753065612 | 3.751512361  | 3.559017611 | 0.059222779 | 0.999071534 | Abcc9         | Abcc9         | ABCC9         |  | 8.000523824 | 32.19449411 | 24.10063888 | 6.938210655 | 16.15443271 | 12.2968053  | 9.189571674 | 12.64208879 | 4.871256616 | 9.86920364  |
| ENSMUSG000000055538 | -0.45725112  | 7.330621296  | 3.558041004 | 0.059257634 | 0.999071534 | Zcchc24       | Zcchc24       | ZCCHC24       |  | 171.8709021 | 210.953978  | 161.4338884 | 204.0527754 | 217.1365045 | 183.8699822 | 130.2718858 | 136.0924312 | 80.06145954 | 138.6917227 |
| ENSMUSG000000036781 | 0.624413297  | 7.815678206  | 3.554024683 | 0.059401207 | 0.999071534 | Rps27l        | Rps27l        | RPS27L        |  | 201.4868763 | 113.0661147 | 197.6521669 | 232.9157317 | 169.7196473 | 151.7818689 | 336.2606649 | 218.0933022 | 337.9237856 | 220.7825821 |
| ENSMUSG000000071653 | 0.634597858  | 3.956806456  | 3.552539176 | 0.059454404 | 0.999071534 | 1810009A15Rik | 1810009A15Rik | RP11-831H9.11 |  | 16.14140771 | 12.27303919 | 12.38692054 | 8.04832436  | 14.19235587 | 17.17187012 | 35.33455024 | 13.60924312 | 13.19953406 | 11.37245982 |
| ENSMUSG000000093553 | -1.929947192 | -0.113144538 | 3.551269667 | 0.059499906 | 0.999071534 | Gm20633       | Gm20633       |               |  | 1.263240604 | 0.5336104   | 0.336601102 | 1.942698983 | 2.354492217 | 1.382481069 | 0.323576467 | 0.069082452 | 0           | 0           |
| ENSMUSG000000032648 | -1.316584185 | 0.392333753  | 3.543280224 | 0.059787115 | 0.999071534 | Pygm          | Pygm          | PYGM          |  | 3.298461576 | 1.067220799 | 2.692808814 | 0.555056852 | 1.177246109 | 0.363810808 | 0.582437641 | 1.174401691 | 0.628549241 | 0.392153787 |
| ENSMUSG000000096795 | 0.663051047  | 3.451808513  | 3.542975767 | 0.059798089 | 0.999071534 | Zfp433        | Zfp433        |               |  | 9.544484562 | 8.952796705 | 9.020909526 | 5.82809695  | 10.33360473 | 9.531843159 | 15.46695514 | 8.289894287 | 17.20653547 | 11.30710086 |
| ENSMUSG000000041220 | 0.577013229  | 5.220799686  | 3.542767978 | 0.05980558  | 0.999071534 | Elov16        | Elov16        | ELOVL6        |  | 37.05505771 | 18.32062372 | 29.62089695 | 43.36381659 | 25.3761939  | 53.48018872 | 51.31922773 | 18.30684988 | 47.37689902 | 43.52907036 |
| ENSMUSG000000063382 | -0.628963534 | 4.212648181  | 3.539115969 | 0.059937398 | 0.999071534 | BcI9l         | BcI9l         | BCL9L         |  | 23.79103137 | 38.00491846 | 15.95489222 | 16.65170557 | 22.23687094 | 25.32123221 | 10.16030108 | 19.82666384 | 6.521198373 | 10.78422914 |
| ENSMUSG000000029098 | -0.533403511 | 4.135006491  | 3.537670093 | 0.059989672 | 0.999071534 | Ac ox3        | Ac ox3        | ACOX3         |  | 16.77302802 | 26.50264985 | 17.43593707 | 26.36520049 | 19.48996336 | 24.81189708 | 11.77818341 | 12.71117124 | 9.349669957 | 12.41820326 |
| ENSMUSG000000015672 | 0.475430285  | 5.028329658  | 3.536326357 | 0.060038297 | 0.999071534 | MrpI32        | MrpI32        | MRPL32        |  | 23.72085134 | 28.69638149 | 31.97710466 | 22.61856673 | 34.53255252 | 25.03018356 | 46.40086542 | 42.20937841 | 27.02761735 | 39.80360938 |
| ENSMUSG000000032263 | 0.454498911  | 6.194065262  | 3.53523285  | 0.060077898 | 0.999071534 | Bckd hb       | Bckd hb       | BCKDHB        |  | 82.95279965 | 55.6733517  | 52.50977187 | 62.86018853 | 66.51440514 | 89.93403164 | 106.3272272 | 57.7529302  | 86.50408926 | 63.85570832 |

|                    |              |              |             |             |             |               |               |          |             |             |             |             |             |             |             |             |             |              |
|--------------------|--------------|--------------|-------------|-------------|-------------|---------------|---------------|----------|-------------|-------------|-------------|-------------|-------------|-------------|-------------|-------------|-------------|--------------|
| ENSMUSG00000024594 | -0.411578955 | 5.309856405  | 3.533928719 | 0.060125163 | 0.999071534 | Prrc1         | Prrc1         | PRRC1    | 40.28333925 | 54.6061309  | 47.59539578 | 47.87365352 | 43.62350858 | 46.05844824 | 30.35147264 | 30.94893867 | 20.03500705 | 40.06504524  |
| ENSMUSG00000040563 | -1.000573298 | 1.650474675  | 3.528012447 | 0.06034008  | 0.999071534 | BC018242      | Pipr2         | PLPPR2   | 2.315941107 | 4.98036373  | 3.500651458 | 7.076974868 | 2.616102464 | 3.492583753 | 1.941458804 | 1.72706131  | 0.471411931 | 2.483640651  |
| ENSMUSG00000028059 | -0.434966968 | 6.473581806  | 3.527856388 | 0.06034576  | 0.999071534 | Arhgef2       | Arhgef2       | ARHGEF2  | 122.2536184 | 101.3266859 | 115.3195374 | 87.42145425 | 104.5132934 | 118.3840368 | 49.44248422 | 79.79023251 | 60.10502115 | 63.39819557  |
| ENSMUSG00000048439 | 0.73096413   | 2.79380895   | 3.527665303 | 0.060352716 | 0.999071534 | Nupl2         | Nupl2         | NUPL2    | 5.052962415 | 3.438822576 | 4.981696305 | 5.342422204 | 7.78290483  | 9.09527019  | 6.989251696 | 5.664761096 | 11.07818037 | 7.320204025  |
| ENSMUSG00000028005 | 2.074913717  | -0.680058536 | 3.526951653 | 0.060378701 | 0.999071534 | Gucy1b3       | Gucy1b3       | GUCY1B3  | 0.421080201 | 0.355740266 | 0           | 0.138764213 | 0.065402562 | 0.800383777 | 1.553167044 | 0           | 1.178529826 | 0.326794823  |
| ENSMUSG00000055360 | 1.045910524  | 1.253191096  | 3.525057108 | 0.060447743 | 0.999071534 | PrI2c5        | PrI2c5        | PRL      | 1.754500839 | 2.312311732 | 1.413724627 | 0.693821065 | 1.504258917 | 1.309718907 | 5.500799946 | 3.45412262  | 1.964216377 | 2.222204793  |
| ENSMUSG00000067928 | 0.556626059  | 3.63270039   | 3.520634903 | 0.060609225 | 0.999071534 | Zfp760        | Zfp760        |          | 8.351423991 | 9.604987194 | 10.36731393 | 9.921641237 | 13.34212257 | 11.71470801 | 15.40223985 | 15.47446934 | 12.64955347 | 14.37897219  |
| ENSMUSG00000032754 | -0.404919162 | 4.710412254  | 3.516408092 | 0.060764002 | 0.999071534 | Slc8b1        | Slc8b1        | SLC8B1   | 32.70389563 | 31.95733394 | 30.69802048 | 27.47531419 | 31.45863213 | 29.10486461 | 21.93848449 | 21.20831288 | 16.73512354 | 20.522771485 |
| ENSMUSG00000022610 | 0.511945101  | 4.366266805  | 3.511411362 | 0.060947514 | 0.999071534 | Mapk12        | Mapk12        | MAPK12   | 18.87842902 | 10.90936817 | 23.831358   | 18.52502245 | 15.30419941 | 24.59361059 | 24.46238094 | 19.27400422 | 24.74912636 | 21.89525311  |
| ENSMUSG00000032344 | 0.569285685  | 3.824616142  | 3.511351292 | 0.060949724 | 0.999071534 | Mb21d1        | Mb21d1        | MB21D1   | 12.07096577 | 8.419186306 | 12.45424076 | 14.77838869 | 10.66061754 | 24.81189708 | 15.14337867 | 11.12227484 | 17.04939816 | 13.46394669  |
| ENSMUSG00000021262 | -0.559718446 | 4.104785709  | 3.504301587 | 0.061209649 | 0.999071534 | Evl           | Evl           | EVL      | 19.65040939 | 21.52228612 | 22.88887492 | 24.42250151 | 16.67765321 | 27.72238354 | 9.966155196 | 9.602460883 | 8.878258026 | 13.46394669  |
| ENSMUSG00000084208 | 1.40055942   | 1.743430509  | 3.50044016  | 0.061352521 | 0.999071534 | Gm12792       | Gm12792       |          | 0.701800335 | 0.592900444 | 3.164050356 | 3.607869541 | 1.046440986 | 1.673529715 | 1.035444696 | 1.865226215 | 12.57098482 | 3.071871332  |
| ENSMUSG00000097603 | 1.24368619   | 3.062342978  | 3.500043451 | 0.061367219 | 0.999071534 | A430010J10Rik | A430010J10Rik |          | 1.122880537 | 2.608761954 | 7.943786    | 10.5460802  | 2.616102464 | 3.34705943  | 2.070889391 | 8.428059192 | 22.31349805 | 15.03256184  |
| ENSMUSG00000000204 | -0.820771559 | 3.581678623  | 3.499801101 | 0.0613762   | 0.999071534 | SIfn4         | SIfn4         | SIFN4    | 28.07201342 | 24.60536843 | 8.751628644 | 8.395234892 | 9.352566308 | 15.93491337 | 12.10175988 | 7.184575049 | 2.749902928 | 5.620870947  |
| ENSMUSG00000058135 | -0.519899164 | 4.935924996  | 3.494969562 | 0.06155554  | 0.999071534 | Gstm1         | Gstm1         |          | 23.08923104 | 46.24623464 | 33.12154841 | 40.44976812 | 43.10028809 | 23.42941601 | 15.98467749 | 32.88324734 | 16.34228026 | 32.2219695   |
| ENSMUSG00000085609 | -1.305849952 | 0.738571754  | 3.488946038 | 0.061779906 | 0.999071534 | 1700016P03Rik | 1700016P03Rik |          | 0.912340436 | 1.541541155 | 1.683005509 | 5.550568524 | 1.373453794 | 0.9459081   | 0.258861174 | 0.483577167 | 0.785686551 | 1.764692042  |
| ENSMUSG00000085342 | 0.706897574  | 6.198078624  | 3.48463098  | 0.06194117  | 0.999071534 | Gm12254       | Gm12254       |          | 29.33525402 | 66.10839951 | 59.98231632 | 50.09388093 | 84.10769421 | 30.26905919 | 131.5661916 | 139.3393065 | 70.161809   | 54.37865847  |
| ENSMUSG00000032062 | 1.012777212  | 2.225299758  | 3.478458506 | 0.06217263  | 0.999071534 | 2310030G06Rik | 2310030G06Rik | C11orf52 | 1.122880537 | 2.193731643 | 5.250977187 | 2.705902155 | 4.381971627 | 3.128772945 | 1.876743511 | 6.839162787 | 7.6997282   | 8.56202435   |
| ENSMUSG00000076448 | 1.500953712  | 0.913146061  | 3.477883393 | 0.062194243 | 0.999071534 | Mir763        | Mir763        |          | 0.912340436 | 0.237160178 | 1.817645949 | 1.040731598 | 0.784830739 | 0.654859454 | 0.19414588  | 1.105319238 | 5.028393926 | 4.705845444  |
| ENSMUSG00000022652 | -1.838120642 | -0.511439336 | 3.476578497 | 0.062243311 | 0.999071534 | Morc1         | Morc1         | MORC1    | 0.491260235 | 1.007930755 | 0.875162864 | 0.555056852 | 1.63506404  | 0.654859454 | 0           | 0.069082452 | 0           | 0.522877116  |
| ENSMUSG00000039680 | 0.437257105  | 5.622338882  | 3.474546344 | 0.062319808 | 0.999071534 | Mrps6         | Mrps6         | MRPS6    | 46.66972231 | 32.13520407 | 41.80585683 | 50.92646621 | 44.47374189 | 50.4969401  | 74.16372633 | 44.42001689 | 52.87670488 | 47.7740305   |
| ENSMUSG00000021532 | 0.662776743  | 2.864127902  | 3.471279204 | 0.062443004 | 0.999071534 | Fastkd3       | Fastkd3       | FASTKD3  | 4.912602348 | 7.52983564  | 4.914376085 | 3.81601586  | 7.717502268 | 9.604605321 | 9.060141087 | 7.944482025 | 7.85686551  | 7.777716776  |
| ENSMUSG00000071074 | -0.44455401  | 5.553326652  | 3.471085549 | 0.062450315 | 0.999071534 | Yipf3         | Yipf3         | YIPF3    | 54.45970603 | 71.74095373 | 46.58559248 | 46.90230403 | 61.4784079  | 58.93735083 | 45.17127485 | 37.5808541  | 17.36367278 | 39.2153787   |
| ENSMUSG00000061024 | 0.514818477  | 6.051903257  | 3.466486317 | 0.062624203 | 0.999071534 | Rrs1          | Rrs1          | RRS1     | 52.35430502 | 36.99698771 | 70.21498982 | 57.44838422 | 65.66417184 | 100.5573072 | 88.14222972 | 34.33397884 | 81.39712668 | 71.82950199  |
| ENSMUSG00000003420 | -0.488450981 | 5.759930288  | 3.465350021 | 0.062667243 | 0.999071534 | Fcgrt         | Fcgrt         | FCGRT    | 67.44301223 | 60.12010503 | 64.82937219 | 82.21779626 | 51.34101085 | 72.18006423 | 60.24993823 | 33.50498941 | 19.17075184 | 41.30686557  |
| ENSMUSG00000043953 | -1.130921825 | 2.139031208  | 3.464663738 | 0.062693253 | 0.999071534 | CcrI2         | CcrI2         | CCRL2    | 8.702324159 | 12.56948941 | 4.847055865 | 1.457024238 | 3.139322957 | 1.45524323  | 1.229590576 | 6.562832977 | 1.492804447 | 1.895409971  |
| ENSMUSG00000086061 | 2.330044855  | -0.681248003 | 3.464100909 | 0.062714593 | 0.999071534 | Gm13075       | Gm13075       |          | 0           | 0           | 0.538561763 | 0           | 0.327012808 | 0.072762162 | 0.388291761 | 0.207247357 | 1.649941757 | 1.503256184  |
| ENSMUSG00000085735 | 1.553640972  | -0.084710899 | 3.461397628 | 0.062817197 | 0.999071534 | 4930550G17Rik | MettI5os      |          | 0.771980369 | 0.118580089 | 0.807842644 | 0.346910533 | 0.130805123 | 0.800383777 | 0.647152935 | 0.414494714 | 2.121353688 | 1.699333077  |
| ENSMUSG00000054934 | 1.762103988  | -0.50654095  | 3.458315341 | 0.062934405 | 0.999071534 | Kcnmb4        | Kcnmb4        | KCNMB4   | 0.631620302 | 0.059290044 | 0.336601102 | 0.346910533 | 0           | 1.091432423 | 0.517722348 | 0.414494714 | 1.649941757 | 0.588230681  |
| ENSMUSG00000020521 | 0.436844115  | 5.556786527  | 3.458142659 | 0.062940978 | 0.999071534 | Rnft1         | Rnft1         | RNFT1    | 35.58127701 | 42.51096184 | 37.36272229 | 41.14358918 | 50.49077755 | 42.63862665 | 71.51039929 | 45.59441858 | 51.54103774 | 45.03232654  |
| ENSMUSG00000015488 | -0.426119298 | 4.661568172  | 3.457918742 | 0.062949503 | 0.999071534 | Cacfd1        | Cacfd1        | CACFD1   | 28.98435385 | 27.80703083 | 31.57318334 | 33.09526482 | 27.99229636 | 29.83248622 | 20.90303979 | 16.51070612 | 16.02800564 | 22.15668897  |
| ENSMUSG00000033931 | 0.446149781  | 5.494562089  | 3.457433349 | 0.062967987 | 0.999071534 | Rbm34         | Rbm34         | RBM34    | 38.73937852 | 34.86254611 | 41.73853661 | 46.13910086 | 35.2519807  | 44.53044285 | 51.77223478 | 38.13351372 | 59.16219729 | 50.84927438  |
| ENSMUSG00000028270 | -0.671068473 | 7.112024192  | 3.454898098 | 0.063064622 | 0.999071534 | Gbp2          | Gbp2          | GBP2     | 224.2252072 | 294.0193302 | 92.49798275 | 108.7911431 | 169.0656217 | 122.53148   | 70.79853107 | 170.3573276 | 38.34150369 | 123.7898788  |
| ENSMUSG00000025491 | -0.584515022 | 5.315187514  | 3.454560169 | 0.063077515 | 0.999071534 | Ifitm1        | Ifitm1        | IFITM1   | 71.16255401 | 62.31383667 | 34.06403149 | 34.76043538 | 46.43581873 | 18.918162   | 28.60415972 | 46.69973782 | 15.3994564  | 42.81012175  |
| ENSMUSG00000039159 | -0.437856704 | 6.306727343  | 3.45268481  | 0.063149115 | 0.999071534 | Ube2h         | Ube2h         | UBE2H    | 78.8823577  | 109.7458722 | 88.12216843 | 90.54364905 | 104.9057088 | 84.62239385 | 43.94168427 | 88.35645661 | 43.52703492 | 67.71188723  |
| ENSMUSG00000097536 | 1.909306747  | -0.022291572 | 3.452468439 | 0.063157381 | 0.999071534 | 2610037D02Rik | 2610037D02Rik |          | 1.543960738 | 0.177870133 | 0           | 0           | 0.196207685 | 0.363810808 | 1.100159989 | 1.105319238 | 1.492804447 | 2.287563758  |
| ENSMUSG00000024400 | -0.459020483 | 5.077946374  | 3.446066849 | 0.063402477 | 0.999071534 | Wdr33         | Wdr33         | WDR33    | 40.42369932 | 40.96942069 | 40.72873331 | 38.85397967 | 41.33441893 | 47.36816715 | 24.07408917 | 29.70545453 | 11.94243557 | 29.41153403  |
| ENSMUSG00000097051 | 1.52016374   | 1.24896433   | 3.445976344 | 0.063405949 | 0.999071534 | Gm26836       | Gm26836       |          | 1.19306057  | 0.059290044 | 2.827449254 | 0.624438959 | 1.438856355 | 0.436572969 | 1.100159989 | 1.588896405 | 7.621159544 | 3.92153787   |
| ENSMUSG00000024580 | 0.427718373  | 4.640041845  | 3.444326242 | 0.063469294 | 0.999071534 | Grpel2        | Grpel2        | GRPEL2   | 24.49283171 | 22.58950692 | 20.46534698 | 16.65170557 | 26.09562208 | 28.66829164 | 31.7752091  | 26.87307398 | 23.49202787 | 26.20894477  |

|                     |              |              |             |             |             |               |               |         |             |             |             |             |             |             |             |             |             |             |
|---------------------|--------------|--------------|-------------|-------------|-------------|---------------|---------------|---------|-------------|-------------|-------------|-------------|-------------|-------------|-------------|-------------|-------------|-------------|
| ENSMUSG00000025647  | -0.598548758 | 6.531375341  | 3.441973954 | 0.063559712 | 0.999071534 | Shisa5        | Shisa5        | SHISA5  | 142.8163683 | 177.632973  | 80.51498353 | 71.25542343 | 109.6800958 | 137.374961  | 92.73701556 | 66.04282449 | 25.14196963 | 53.398274   |
| ENSMUSG00000073434  | 0.519098156  | 4.143432312  | 3.438896494 | 0.063678211 | 0.999071534 | Wdr90         | Wdr90         | WDR90   | 18.59770889 | 13.57742017 | 12.25222801 | 10.68484441 | 20.20939153 | 22.26522143 | 15.14337867 | 17.68510781 | 21.84208612 | 21.69917622 |
| ENSMUSG00000062488  | -1.219828173 | 2.771936038  | 3.436284354 | 0.063778977 | 0.999071534 | I830012O16Rik | Ift3b         | IFIT3   | 6.667103186 | 12.45090933 | 10.56927459 | 13.39074656 | 5.035997243 | 8.294886414 | 4.012348196 | 6.079255811 | 1.964216377 | 0           |
| ENSMUSG00000078670  | -1.094278844 | 1.630784575  | 3.434985339 | 0.063829152 | 0.999071534 | Fam174b       | Fam174b       | FAM174B | 6.316203019 | 6.99622524  | 4.847055865 | 0.555056852 | 2.419894779 | 3.34705943  | 2.329750565 | 1.4507315   | 0.785686551 | 1.568615148 |
| ENSMUSG00000025477  | -0.420359142 | 4.766340764  | 3.434251031 | 0.063857533 | 0.999071534 | Inpp5a        | Inpp5a        | INPP5A  | 33.54605603 | 36.93769767 | 30.83266092 | 30.25059846 | 29.43115272 | 34.34374024 | 22.45620684 | 22.17546722 | 16.42084892 | 18.75802281 |
| ENSMUSG00000041046  | -0.613836585 | 5.861381469  | 3.433538821 | 0.063885073 | 0.999071534 | Ramp3         | Ramp3         | RAMP3   | 116.4988557 | 102.6903569 | 51.02872702 | 50.02449882 | 46.17420849 | 32.45192404 | 79.85867215 | 48.35771668 | 21.37067419 | 40.26112213 |
| ENSMUSG00000049191  | -1.03942406  | 1.172881038  | 3.433395136 | 0.063890631 | 0.999071534 | Rgag4         | Rgag4         | RGAG4   | 4.982782381 | 3.142372354 | 1.144443746 | 1.734552664 | 3.924153696 | 2.255627007 | 1.29430587  | 0.828989429 | 1.571373102 | 0.784307574 |
| ENSMUSG00000097571  | 1.029426967  | 1.393696089  | 3.432883457 | 0.063910426 | 0.999071534 | Jpx           | Jpx           |         | 2.877381375 | 1.007930755 | 1.615685288 | 1.80393477  | 1.24264867  | 2.255627007 | 1.876743511 | 1.72706131  | 3.69272679  | 6.274460592 |
| ENSMUSG00000090622  | 1.45177457   | 0.492482143  | 3.432545206 | 0.063923516 | 0.999071534 | A930033H14Rik | A930033H14Rik |         | 0           | 0.474320355 | 0.403921322 | 1.526406344 | 1.111843547 | 0.9459081   | 0.970729402 | 2.486968286 | 2.435628308 | 1.895409971 |
| ENSMUSG00000074733  | 0.585113934  | 3.760705167  | 3.430552812 | 0.064000675 | 0.999071534 | 5830428H3Rik  | Zfp950        |         | 12.63240604 | 8.715636528 | 10.36731393 | 12.00310443 | 11.96866877 | 11.05984855 | 12.23119047 | 13.95465538 | 17.83508471 | 20.45735589 |
| ENSMUSG00000014074  | 0.480109439  | 5.849973043  | 3.430177812 | 0.064015209 | 0.999071534 | Rnf168        | Rnf168        | RNF168  | 48.35404311 | 33.08384478 | 64.35813065 | 53.84051468 | 49.0519212  | 68.32366967 | 55.46100651 | 52.29541646 | 85.79697137 | 53.59435089 |
| ENSMUSG00000029661  | 0.584762379  | 8.772180415  | 3.429188287 | 0.064053576 | 0.999071534 | Col1a2        | Col1a2        | COL1A2  | 341.9873034 | 225.7764891 | 578.4153332 | 269.618866  | 403.0759871 | 713.8695667 | 655.0482006 | 277.158799  | 365.2656776 | 573.7863494 |
| ENSMUSG00000080999  | 2.292183234  | 1.140540305  | 3.427054952 | 0.064136377 | 0.999071534 | Gm11336       | Gm11336       |         | 0.421080201 | 0           | 0.471241542 | 0           | 2.943115272 | 0           | 0.388291761 | 0.759906976 | 9.978219197 | 3.660102012 |
| ENSMUSG00000095562  | 0.857053082  | 4.280400386  | 3.425948243 | 0.064179376 | 0.999071534 | Gm21887       | Gm21887       |         | 7.649623656 | 5.336103997 | 31.1019418  | 14.77838869 | 11.96866877 | 14.5524323  | 9.836724609 | 27.01123889 | 38.10579772 | 23.72530412 |
| ENSMUSG00000030760  | 0.457549129  | 5.517944762  | 3.425707632 | 0.064188729 | 0.999071534 | Acer3         | Acer3         | ACER3   | 41.82729999 | 33.97319545 | 43.82546344 | 40.72729654 | 39.30693952 | 45.69463744 | 81.54126978 | 42.62387313 | 45.33411399 | 37.97355838 |
| ENSMUSG00000037820  | -0.490161589 | 7.254398691  | 3.421911816 | 0.064336466 | 0.999071534 | Tgm2          | Tgm2          | TGM2    | 213.5578421 | 228.266671  | 156.115591  | 136.2664573 | 195.6844643 | 189.0360956 | 77.78778276 | 133.6054629 | 82.96849978 | 143.3322092 |
| ENSMUSG00000037622  | -0.437964373 | 5.022707598  | 3.419238041 | 0.06444075  | 0.999071534 | Wdttc1        | Wdttc1        | WDTC1   | 40.42369932 | 42.4516718  | 35.61239656 | 36.84189858 | 38.19509597 | 40.74681045 | 18.57328923 | 32.39967017 | 15.63516236 | 28.82330335 |
| ENSMUSG00000078974  | 0.903438324  | 1.761087975  | 3.416242074 | 0.064557814 | 0.999071534 | Sec61g        | Sec61g        | SEC61G  | 2.526481208 | 1.837991377 | 2.760129034 | 2.914048475 | 1.700466601 | 2.910486461 | 7.312828163 | 2.417885834 | 4.242707375 | 3.267948225 |
| ENSMUSG00000030246  | -0.46965584  | 4.946031331  | 3.415302273 | 0.064594583 | 0.999071534 | Ldhb          | Ldhb          | LDHB    | 47.30134261 | 34.74396602 | 27.26468924 | 38.99274388 | 36.75623962 | 33.32506998 | 31.58106322 | 13.47107822 | 21.5278115  | 25.68607305 |
| ENSMUSG00000026271  | -0.795950844 | 3.65529979   | 3.410742556 | 0.064773293 | 0.999071534 | Gpr35         | Gpr35         | GPR35   | 19.93112953 | 32.43165429 | 8.280387102 | 7.007592761 | 15.30419941 | 11.64194584 | 6.018522294 | 15.8198816  | 6.206923753 | 4.64048648  |
| ENSMUSG00000058355  | 0.480281284  | 7.431492515  | 3.410079859 | 0.064799311 | 0.999071534 | Abce1         | Abce1         | ABCE1   | 158.5366958 | 137.552903  | 158.2025178 | 121.0717759 | 174.8210471 | 261.3616842 | 267.5330232 | 127.04263   | 165.7798623 | 159.2797965 |
| ENSMUSG00000020024  | 0.377650363  | 5.4928453    | 3.407782511 | 0.064888959 | 0.999071534 | Ccdc41        | Cep83         | CEP83   | 43.37126073 | 38.65710895 | 40.59409287 | 32.8177364  | 48.00548021 | 56.24515086 | 56.30230533 | 49.32487101 | 39.28432755 | 44.70553172 |
| ENSMUSG00000037126  | 0.851062992  | 3.421735056  | 3.407383462 | 0.064905285 | 0.999071534 | Psd           | Psd           | PSD     | 5.614402683 | 4.328173242 | 12.38692054 | 9.921641237 | 6.671061283 | 14.1886215  | 3.17104938  | 10.56961522 | 20.19214436 | 15.42471562 |
| ENSMUSG00000053985  | 0.848531648  | 1.449684569  | 3.406617379 | 0.064935427 | 0.999071534 | Zfp14         | Zfp14         | ZFP14   | 1.824680872 | 1.778701332 | 1.88496617  | 1.873316877 | 2.289089656 | 2.619437815 | 2.847472913 | 3.523205072 | 3.299883514 | 3.594743048 |
| ENSMUSG00000056749  | -0.564105995 | 5.417299717  | 3.40210467  | 0.065113289 | 0.999071534 | Nfib          | Nfib          | NFIL3   | 69.19751307 | 82.1167115  | 34.26599215 | 35.38487434 | 44.53914445 | 23.50217817 | 27.89229149 | 53.33165325 | 23.57059653 | 35.48991773 |
| ENSMUSG00000058704  | 0.537141386  | 6.991811584  | 3.400502015 | 0.06517658  | 0.999071534 | Memo1         | Memo1         | MEMO1   | 96.98880635 | 76.12841702 | 133.832598  | 132.7973519 | 95.55314249 | 107.9790477 | 152.2103703 | 108.1831204 | 187.6219484 | 145.554414  |
| ENSMUSG00000029196  | 0.504191578  | 4.074920839  | 3.399077999 | 0.065232872 | 0.999071534 | Tada2b        | Tada2b        | TADA2B  | 14.59744698 | 14.64464097 | 12.45424076 | 15.12529923 | 14.91178404 | 25.39399437 | 17.02012219 | 11.605852   | 16.81369219 | 24.70568858 |
| ENSMUSG00000074037  | 1.411151298  | 0.554460312  | 3.398159037 | 0.065269226 | 0.999071534 | Mc1r          | Mc1r          | MC1R    | 0.421080201 | 0.652190488 | 1.279084186 | 1.110113705 | 0.327012808 | 0.9459081   | 0.19414588  | 1.312566595 | 3.142746204 | 3.398666154 |
| ENSMUSG00000027831  | 1.825636469  | -0.122186833 | 3.397338423 | 0.065301708 | 0.999071534 | Veph1         | Veph1         | VEPH1   | 0.421080201 | 0.355740266 | 0.134640441 | 0.901967385 | 0           | 0.291048646 | 0.19414588  | 1.4507315   | 2.749902928 | 0.915025503 |
| ENSMUSG00000021131  | 0.56446151   | 7.249031105  | 3.397200179 | 0.065307182 | 0.999071534 | Erh           | Erh           | ERH     | 124.7099196 | 69.9622524  | 172.4744045 | 143.2046679 | 123.6108414 | 126.8972097 | 206.0534944 | 140.3755433 | 211.1925449 | 163.5281292 |
| ENSMUSG00000011008  | 1.799579037  | 0.152854129  | 3.395821463 | 0.065361799 | 0.999071534 | Mcoln2        | Mcoln2        | MCOLN2  | 0.631620302 | 0.830060622 | 0.201960661 | 0           | 0.588623054 | 2.328389169 | 3.753487022 | 0.552659619 | 0           | 1.111102397 |
| ENSMUSG00000098506  | 1.513381839  | 0.523675989  | 3.384771313 | 0.065801307 | 0.999071534 | RP23-2C22.1   | Phf20-ps      |         | 0           | 0.711480533 | 0.269280881 | 1.595788451 | 0.915635862 | 0.9459081   | 0.517722348 | 2.141556024 | 3.064177549 | 2.287563758 |
| ENSMUSG00000029675  | 1.458596777  | 1.330829272  | 3.384480367 | 0.065812921 | 0.999071534 | Eln           | Eln           | ELN     | 2.245761073 | 1.837991377 | 1.750325729 | 0.485674746 | 0.261610246 | 13.46099988 | 3.429910554 | 1.036236786 | 0.235705965 | 1.111102397 |
| ENSMUSG00000097639  | 1.754645219  | 2.898851851  | 3.38263409  | 0.065886676 | 0.999071534 | C430002E04Rik | Platr4        |         | 4.000261912 | 0.592900444 | 5.318297407 | 7.076974868 | 0.130805123 | 0.582097292 | 0.453007054 | 2.763298096 | 26.00622484 | 19.01945867 |
| ENSMUSG00000018334  | -0.49907084  | 4.989092978  | 3.377636458 | 0.066086764 | 0.999071534 | Ksr1          | Ksr1          | KSR1    | 40.42369932 | 44.11179304 | 31.775144   | 40.86606076 | 34.85956533 | 27.43133489 | 12.68419752 | 33.91948413 | 18.62077126 | 33.98666154 |
| ENSMUSG00000032492  | 2.095784693  | -0.817510201 | 3.375668716 | 0.066165723 | 0.999071534 | Pth1r         | Pth1r         | PTH1R   | 0.070180034 | 0.415030311 | 0.134640441 | 0           | 0.196207685 | 1.236956746 | 1.229590576 | 0           | 0.078568655 | 1.045743432 |
| ENSMUSG00000029066  | 0.499730698  | 6.045311953  | 3.372507083 | 0.066292801 | 0.999071534 | Mrp120        | Mrp120        | MRP120  | 56.84582717 | 39.7836198  | 70.8208718  | 60.22366848 | 55.06895686 | 53.26190223 | 105.5506437 | 52.29541646 | 81.00428341 | 71.56806613 |
| ENSMUSG00000081946  | 1.528447421  | 0.448876821  | 3.372457146 | 0.06629481  | 0.999071534 | Gm11472       | Gm11472       |         | 0.350900168 | 0.296450222 | 0.403921322 | 1.595788451 | 0.654025616 | 0.291048646 | 1.68259763  | 2.003391119 | 3.928432755 | 0.326794823 |
| ENSMUSG000000334837 | 1.667553093  | 0.242741172  | 3.372352956 | 0.066299003 | 0.999071534 | Gnat1         | Gnat1         | GNAT1   | 0.070180034 | 0.474320355 | 1.077123525 | 0.832585279 | 0.196207685 | 0.727621615 | 0.19414588  | 1.174401691 | 4.242707375 | 0.849666539 |

|                     |              |             |             |             |             |          |          |          |             |              |             |             |             |             |             |             |             |             |
|---------------------|--------------|-------------|-------------|-------------|-------------|----------|----------|----------|-------------|--------------|-------------|-------------|-------------|-------------|-------------|-------------|-------------|-------------|
| ENSMUSG00000000957  | -0.563054632 | 8.183328485 | 3.371843471 | 0.066319507 | 0.999071534 | Mmp14    | Mmp14    | MMP14    | 339.6011823 | 509.1829014  | 310.6828169 | 341.4293463 | 298.3010834 | 413.070791  | 265.0091268 | 225.4851246 | 95.46091594 | 188.1030998 |
| ENSMUSG00000038838  | 0.536305418  | 3.924461208 | 3.370234897 | 0.06638429  | 0.999071534 | Vars2    | Vars2    | VARS2    | 12.3516859  | 17.07553279  | 12.72352164 | 7.076974868 | 14.97718661 | 18.918162   | 16.8906916  | 13.88557293 | 17.59937874 | 18.10443317 |
| ENSMUSG00000000982  | -1.246159445 | 1.659091648 | 3.368548888 | 0.066452263 | 0.999071534 | CcB      | CcB      | CCL18    | 3.930081878 | 13.45884008  | 1.615685288 | 1.457024238 | 1.700466601 | 1.964578361 | 1.48845175  | 3.45412262  | 0.31427462  | 1.568615148 |
| ENSMUSG00000025050  | 0.588483861  | 3.722982058 | 3.367313251 | 0.066502127 | 0.999071534 | Pcgf6    | Pcgf6    | PCGF6    | 9.684844629 | 7.233385418  | 12.85816209 | 11.93372233 | 12.36108414 | 14.77071879 | 16.50239984 | 11.05319238 | 19.56359512 | 12.09140843 |
| ENSMUSG00000045826  | -1.265716918 | 1.197421365 | 3.366130803 | 0.066549881 | 0.999071534 | Ptprcap  | Ptprcap  | PTPRCAP  | 6.105662918 | 4.268883197  | 2.760129034 | 1.457024238 | 1.308051232 | 2.182864846 | 0.776583522 | 1.243484143 | 0           | 2.222204793 |
| ENSMUSG00000001930  | -0.899516557 | 1.98799402  | 3.364839836 | 0.06660206  | 0.999071534 | Vwf      | Vwf      | VWF      | 5.403862583 | 10.73149804  | 2.760129034 | 3.954780073 | 3.073920395 | 3.856394561 | 1.48845175  | 2.141556024 | 2.121353688 | 3.464025119 |
| ENSMUSG00000021994  | -0.418751322 | 6.930234276 | 3.362925261 | 0.066679525 | 0.999071534 | Wnt5a    | Wnt5a    | WNT5A    | 119.0253369 | 155.9328168  | 133.6306374 | 135.8501646 | 179.922447  | 102.0125505 | 98.88496844 | 114.8150359 | 85.79697137 | 99.21490812 |
| ENSMUSG00000044456  | -0.47266384  | 4.558050641 | 3.360818655 | 0.066764871 | 0.999071534 | Rin3     | Rin3     | RIN3     | 32.14245536 | 29.46715207  | 27.1300488  | 21.92474567 | 31.26242444 | 34.4165024  | 16.24353866 | 20.24115855 | 12.41384751 | 14.64040805 |
| ENSMUSG00000083624  | 2.311910793  | 4.372472579 | 3.357924145 | 0.066882327 | 0.999071534 | Gm12469  | Gm12469  |          | 0.210540101 | 2.786632087  | 11.98299922 | 19.56575405 | 0           | 1.091432423 | 0           | 45.45625368 | 71.49747614 | 29.41153403 |
| ENSMUSG00000030351  | -0.393649412 | 5.33066179  | 3.356520589 | 0.066939362 | 0.999071534 | Tspan11  | Tspan11  | TSPAN11  | 46.31882214 | 50.69298797  | 38.57448626 | 49.12253144 | 51.73342622 | 47.87750228 | 37.98787727 | 28.94554755 | 20.8206936  | 35.68599462 |
| ENSMUSG00000044468  | -1.04299883  | 1.73799252  | 3.353056233 | 0.067080361 | 0.999071534 | Fam46c   | Fam46c   | FAM46C   | 3.158101509 | 10.43504782  | 3.500651458 | 2.914048475 | 2.354492217 | 3.274297269 | 0.776583522 | 3.661369977 | 1.257098482 | 1.30717929  |
| ENSMUSG00000053334  | -0.819335966 | 2.111153317 | 3.352896505 | 0.06708687  | 0.999071534 | Ficd     | Ficd     | FICD     | 5.75476275  | 5.929004441  | 3.433331237 | 5.273040098 | 7.39048946  | 5.166113468 | 3.494625848 | 2.003391119 | 2.907040239 | 1.30717929  |
| ENSMUSG00000020902  | -0.459865006 | 5.786914552 | 3.35069151  | 0.067176788 | 0.999071534 | Ntn1     | Ntn1     | NTN1     | 71.30291408 | 76.18770706  | 50.75944614 | 67.23126125 | 65.7295744  | 94.29976133 | 40.38234313 | 32.81416489 | 31.42746204 | 35.1631229  |
| ENSMUSG00000029664  | 1.041961274  | 1.69199964  | 3.347816259 | 0.067294232 | 0.999071534 | Tfpi2    | Tfpi2    | TFPI2    | 3.158101509 | 3.142372354  | 0.942483085 | 0.763203172 | 2.616102464 | 5.602686437 | 8.73656462  | 2.486968286 | 1.492804447 | 2.548999616 |
| ENSMUSG00000018930  | -0.922248635 | 1.881658685 | 3.343496105 | 0.067471108 | 0.999071534 | CcI4     | CcI4     | CCL4     | 4.070441945 | 10.73149804  | 3.231370576 | 3.954780073 | 2.092881971 | 2.837724299 | 1.876743511 | 2.970545453 | 1.492804447 | 2.745076509 |
| ENSMUSG00000068735  | -0.560909854 | 7.385894342 | 3.341238281 | 0.067563745 | 0.999071534 | Trp53i11 | Trp53i11 | TP53I11  | 132.8508035 | 209.0566966  | 159.1450009 | 231.7362359 | 300.1977577 | 170.8455553 | 67.23918993 | 163.3109175 | 93.0258764  | 164.8353085 |
| ENSMUSG00000028549  | 0.696651755  | 2.984253273 | 3.337405119 | 0.06772133  | 0.999071534 | Itgb3bp  | Itgb3bp  | ITGB3BP  | 7.158363421 | 4.98036373   | 6.664701814 | 5.481186417 | 6.605658721 | 5.020589145 | 10.28973166 | 7.668152216 | 11.39245499 | 10.39207536 |
| ENSMUSG00000080779  | 1.454549168  | 0.042062071 | 3.336133735 | 0.067773684 | 0.999071534 | Gm8731   | Gm8731   |          | 0.070180034 | 1.067220799  | 0.538561763 | 0.555056852 | 0.261610246 | 1.382481069 | 1.29430587  | 0.828989429 | 2.78490998  | 0.457512752 |
| ENSMUSG00000097633  | 1.303355999  | 1.259031015 | 3.335300868 | 0.067808004 | 0.999071534 | Gm16617  | Gm16617  |          | 0.771980369 | 0.177870133  | 1.683005509 | 2.705902155 | 1.373453794 | 1.309718907 | 0.711868228 | 2.348803381 | 4.871256616 | 5.555511983 |
| ENSMUSG00000074800  | -0.519213549 | 6.539969335 | 3.334832095 | 0.067827329 | 0.999071534 | Gm4149   | Gm4149   |          | 193.2758124 | 88.87577657  | 75.60060744 | 138.4173026 | 70.56936396 | 94.29976133 | 65.94488406 | 62.03604225 | 59.24076594 | 90.52216584 |
| ENSMUSG00000052428  | 0.411647944  | 6.266402264 | 3.33190106  | 0.067948294 | 0.999071534 | Tmco1    | Tmco1    | TMCO1    | 74.32065552 | 62.72886698  | 63.28100712 | 66.46805807 | 75.86697145 | 75.81817231 | 115.9050906 | 69.3587822  | 77.94010586 | 80.26080841 |
| ENSMUSG00000028222  | 1.76385699   | 0.518807706 | 3.328898398 | 0.068072454 | 0.999071534 | Calb1    | Calb1    | CALB1    | 0.210540101 | 0.177870133  | 1.615685288 | 0.624438959 | 0.523220493 | 0.072762162 | 0.19414588  | 1.105319238 | 5.814080477 | 1.568615148 |
| ENSMUSG00000025986  | 0.448795869  | 5.15292201  | 3.327848638 | 0.068115919 | 0.999071534 | Slc39a10 | Slc39a10 | SLC39A10 | 30.87921476 | 26.384066976 | 36.4202392  | 19.49637194 | 43.4273009  | 47.73197796 | 49.18362304 | 33.29774205 | 36.45585597 | 31.1108671  |
| ENSMUSG00000022890  | 0.45210337   | 6.607319054 | 3.32339026  | 0.068300846 | 0.999071534 | Atp5j    | Atp5j    | ATP5J    | 73.82939529 | 76.8991876   | 91.62281989 | 95.3310144  | 87.90104278 | 74.5084534  | 124.5769399 | 122.8286004 | 107.4819202 | 100.6528053 |
| ENSMUSG00000038648  | -0.426695354 | 5.445861665 | 3.322606601 | 0.068333407 | 0.999071534 | Creb3l2  | Creb3l2  | CREB3L2  | 35.65145704 | 66.87917009  | 53.51957517 | 49.88573461 | 52.58365952 | 48.6051239  | 33.00479967 | 40.41323465 | 20.50641898 | 40.26112213 |
| ENSMUSG00000056888  | 0.454950715  | 6.592906626 | 3.321919647 | 0.068361963 | 0.999071534 | Gilpr1   | Gilpr1   | GLIPR1   | 73.47849512 | 75.06119622  | 90.81497724 | 91.0987059  | 90.7787555  | 72.68939936 | 134.9961022 | 131.4639069 | 84.85414751 | 106.2083173 |
| ENSMUSG00000028145  | 0.669950425  | 2.893896685 | 3.315127048 | 0.068645015 | 0.999071534 | Them4    | Them4    | THEM4    | 7.228543455 | 6.403324796  | 4.510454763 | 4.579219032 | 6.671061283 | 6.69411886  | 8.412988152 | 10.70778012 | 9.428238612 | 6.993409202 |
| ENSMUSG00000008140  | -0.611624553 | 5.461809027 | 3.311616494 | 0.068791793 | 0.999071534 | Emc10    | Emc10    | EMC10    | 74.53119562 | 67.11633027  | 31.97710466 | 51.06523042 | 51.86423135 | 66.35909131 | 54.03727006 | 19.34308667 | 12.33527885 | 25.75143201 |
| ENSMUSG00000025001  | 0.507880358  | 5.334517945 | 3.311421547 | 0.068799953 | 0.999071534 | Hells    | Hells    | HELLS    | 34.5285765  | 26.97697021  | 32.58298665 | 35.38487434 | 42.96948297 | 74.21740475 | 64.78000877 | 20.79381817 | 39.12719024 | 34.31345637 |
| ENSMUSG000000041609 | -1.111136146 | 0.602782611 | 3.306011275 | 0.069026846 | 0.999071534 | Ccdc64   | Ccdc64   | BICDL1   | 1.403600671 | 2.430891821  | 2.356207712 | 1.873316877 | 1.700466601 | 1.528005392 | 1.229590576 | 0.207247357 | 0.471411931 | 0.915025503 |
| ENSMUSG00000074797  | 0.405472959  | 5.397024188 | 3.298768343 | 0.069331851 | 0.999071534 | Itpa     | Itpa     | ITPA     | 40.49387935 | 31.2458534   | 41.87317705 | 34.41352485 | 39.76475745 | 59.59221029 | 61.80310527 | 33.98856658 | 39.44164866 | 38.23499424 |
| ENSMUSG000000606037 | 0.437121347  | 6.772606451 | 3.298343138 | 0.069349801 | 0.999071534 | Hnrrnpr  | Hnrrnpr  | HNRNPR   | 79.79469814 | 91.66240865  | 100.509089  | 110.5950778 | 97.31901165 | 129.4438853 | 109.6277072 | 95.47194921 | 142.1306971 | 119.4761871 |
| ENSMUSG00000025736  | 0.646064941  | 3.200513676 | 3.294202969 | 0.069524842 | 0.999071534 | Jmjd8    | Jmjd8    | JMID8    | 7.71980369  | 7.589125684  | 9.290190407 | 4.301690606 | 7.979112515 | 9.313556675 | 7.183397576 | 10.50053276 | 11.86386692 | 13.39858772 |
| ENSMUSG00000026773  | -0.729134875 | 4.005412563 | 3.290614683 | 0.069676933 | 0.999071534 | Pfkfb3   | Pfkfb3   | PFKFB3   | 21.05401006 | 47.31345544  | 14.40652715 | 6.868828548 | 14.51936867 | 16.0804377  | 11.97232929 | 14.3691501  | 6.599767028 | 10.06528053 |
| ENSMUSG00000028042  | -0.441237301 | 5.577389312 | 3.285699888 | 0.069885827 | 0.999071534 | Zbtb7b   | Zbtb7b   | ZBTB7B   | 63.93401056 | 67.59065062  | 46.6529127  | 41.2823534  | 66.84141795 | 54.35333466 | 29.51017383 | 55.95678644 | 23.49202787 | 35.3591998  |
| ENSMUSG00000020359  | 0.574256691  | 3.790959717 | 3.284675499 | 0.069929451 | 0.999071534 | Phykpl   | Phykpl   | PHYKPL   | 11.64988557 | 8.182026128  | 12.05031944 | 13.11321814 | 12.03407133 | 10.55051342 | 13.46078104 | 19.48125158 | 16.89226085 | 16.53581802 |
| ENSMUSG00000027314  | -0.485704312 | 4.167420428 | 3.282887468 | 0.070005664 | 0.999071534 | Dll4     | Dll4     | DLL4     | 25.82625234 | 28.69638149  | 19.92678522 | 14.15394974 | 20.01318385 | 15.78938905 | 17.92613629 | 13.81649048 | 10.21392516 | 14.44433116 |
| ENSMUSG00000020357  | -0.725913218 | 3.147761718 | 3.281969822 | 0.070044813 | 0.999071534 | Flt4     | Flt4     | FLT4     | 6.667103186 | 16.30476221  | 15.41633046 | 9.435966491 | 8.567735569 | 10.55051342 | 6.859821109 | 3.45412262  | 2.985608894 | 9.150255031 |
| ENSMUSG00000031119  | -0.381953548 | 6.102022139 | 3.280025369 | 0.070127845 | 0.999071534 | Gpc4     | Gpc4     | GPC4     | 71.44327415 | 78.44072875  | 76.13916921 | 80.83015413 | 95.81475274 | 63.66689133 | 47.82460188 | 57.96017756 | 49.96966464 | 67.45045137 |

|                    |              |              |             |              |             |               |               |          |             |             |             |             |             |             |             |             |             |             |
|--------------------|--------------|--------------|-------------|--------------|-------------|---------------|---------------|----------|-------------|-------------|-------------|-------------|-------------|-------------|-------------|-------------|-------------|-------------|
| ENSMUSG00000021327 | 0.443846762  | 5.03857091   | 3.274107173 | 0.070381213  | 0.999071534 | Zkscan3       | Zkscan3       | ZKSCAN3  | 26.94913288 | 24.66465847 | 25.24508263 | 30.04245214 | 37.08325242 | 27.21304841 | 34.10495966 | 39.99873994 | 32.44885456 | 45.35912137 |
| ENSMUSG00000048230 | 1.933461578  | -0.649064248 | 3.270348066 | 0.070542655  | 0.999071534 | Fbxo43        | Fbxo43        | FBXO43   | 0.491260235 | 0.355740266 | 0.06732022  | 0           | 0.196207685 | 0.145524323 | 0.064715293 | 0.759906976 | 1.099961171 | 1.699333077 |
| ENSMUSG00000024998 | 1.399247483  | 0.316288125  | 3.269142452 | 0.070594517  | 0.999071534 | Plce1         | Plce1         | PLCE1    | 0           | 0.711480533 | 1.279084186 | 0.277528426 | 0.915635862 | 1.45524323  | 1.100159989 | 0.967154334 | 1.571373102 | 2.679717545 |
| ENSMUSG00000058600 | 0.658194357  | 7.353587534  | 3.26741353  | 0.07066896   | 0.999071534 | RpB0          | RpB0          | RPL30    | 70.60111374 | 94.15259052 | 181.4279938 | 161.1052514 | 146.5671405 | 93.13556675 | 144.5092503 | 199.8555348 | 267.9191139 | 210.1944298 |
| ENSMUSG00000035085 | -0.938683393 | 1.255076711  | 3.2658942   | 0.070734449  | 0.999071534 | 1700020L24Rik | 1700020L24Rik | C1orf50  | 1.824680872 | 2.845922132 | 3.366011017 | 2.497755836 | 4.839789558 | 2.110102684 | 0.906014109 | 2.348803381 | 1.099961171 | 1.045743432 |
| ENSMUSG00000098022 | 0.922647822  | 2.109551808  | 3.265593621 | 0.070747413  | 0.999071534 | Zfp82         | Zfp82         | ZFP82    | 2.035220973 | 4.03172302  | 0.807842644 | 3.330341114 | 4.839789558 | 4.729540499 | 3.494625848 | 4.421276953 | 8.092571475 | 4.771204409 |
| ENSMUSG00000019907 | 0.595317385  | 6.127432438  | 3.265010079 | 0.070772588  | 0.999071534 | Ppp1r12a      | Ppp1r12a      | PPP1R12A | 33.82677617 | 62.43241676 | 72.23459643 | 58.83602635 | 60.43196691 | 59.95602109 | 33.52252202 | 92.70865111 | 110.5460977 | 91.56790927 |
| ENSMUSG00000075054 | 0.470856825  | 4.895331071  | 3.261594645 | 0.070920128  | 0.999071534 | Yae1d1        | Yae1d1        | YAE1D1   | 32.35299546 | 23.47885759 | 26.86076792 | 22.06350988 | 24.46055804 | 37.61803751 | 51.96638066 | 26.32041436 | 29.62038297 | 20.78415071 |
| ENSMUSG00000090247 | 0.613358989  | 7.460250039  | 3.256507011 | 0.071140515  | 0.999071534 | Bloc1s1       | Bloc1s1       | BLOC1S1  | 141.2022275 | 88.34216617 | 144.6711535 | 177.132518  | 168.0191807 | 83.9675344  | 198.4170898 | 225.2087948 | 232.0132385 | 244.965399  |
| ENSMUSG00000091625 | 0.601681427  | 5.451750379  | 3.253938988 | 0.071252036  | 0.999071534 | Lsm5          | Lsm5          | LSM5     | 33.6864161  | 17.07553279 | 56.34702443 | 42.94752395 | 28.71172454 | 41.0378591  | 67.36862051 | 33.43590696 | 67.41190607 | 36.40494323 |
| ENSMUSG00000020072 | 0.954183474  | 1.904215338  | 3.25379286  | 0.071258388  | 0.999071534 | Pbld1         | Pbld2         | PBLD     | 2.17558104  | 1.067220799 | 4.241173882 | 2.914048475 | 2.354492217 | 2.255627007 | 3.365195261 | 4.62852431  | 7.621159544 | 3.856178906 |
| ENSMUSG00000060002 | 0.568097287  | 6.595506565  | 3.250229966 | 0.071413438  | 0.999071534 | Chpt1         | Chpt1         | CHPT1    | 64.14455066 | 69.31006191 | 98.22020148 | 88.53156796 | 82.27642249 | 65.92251834 | 93.83717555 | 84.21150947 | 177.0151799 | 104.7704201 |
| ENSMUSG00000070527 | 1.003904121  | 1.285523391  | 3.249470632 | 0.071446529  | 0.999071534 | Mkrn3         | Mkrn3         | MKRN3    | 0.912340436 | 2.371601776 | 1.817645949 | 1.734552664 | 1.111843547 | 1.236956746 | 1.812028217 | 3.937699786 | 3.69272679  | 3.594743048 |
| ENSMUSG00000028540 | 0.630051504  | 3.264370872  | 3.248025595 | 0.071509548  | 0.999071534 | Dph2          | Dph2          | DPH2     | 9.263764428 | 5.691844263 | 7.270583797 | 5.82809695  | 10.79142266 | 17.09910796 | 12.03704459 | 5.802926001 | 9.113963991 | 12.67963911 |
| ENSMUSG00000008734 | -0.419874781 | 5.257001072  | 3.247122925 | 0.071548945  | 0.999071534 | Gprc5b        | Gprc5b        | GPRC5B   | 41.54657986 | 61.12803578 | 28.67841387 | 40.44976812 | 55.26516455 | 40.52852397 | 32.35764674 | 32.67599998 | 24.59198905 | 28.69258542 |
| ENSMUSG00000086503 | 0.514827554  | 8.395555209  | 3.246910527 | 0.071558218  | 0.999071534 | Xist          | Xist          |          | 285.2818363 | 236.6265672 | 325.4932654 | 343.163899  | 241.3354523 | 329.1760187 | 269.2156209 | 393.4936488 | 405.0999857 | 474.4407233 |
| ENSMUSG00000030824 | -0.512135595 | 6.92250013   | 3.246763044 | 0.071564658  | 0.999071534 | Nucb1         | Nucb1         | NUCB1    | 149.2027513 | 203.8984627 | 117.945026  | 115.5212074 | 156.050512  | 160.0039932 | 133.7017963 | 96.02460883 | 40.777132   | 72.09093785 |
| ENSMUSG00000034714 | -0.425388845 | 4.616038435  | 3.245491367 | 0.071620212  | 0.999071534 | Ttyh2         | Ttyh2         | TTYH2    | 32.2126354  | 32.01662398 | 23.69671756 | 29.48739528 | 27.73068612 | 25.75780518 | 18.18499747 | 23.62619872 | 13.35667137 | 20.91486864 |
| ENSMUSG00000095590 | 2.187599256  | -0.306588666 | 3.244532674 | 0.071662124  | 0.999071534 | Gm24305       | Gm24305       |          | 0           | 0.592900444 | 0.269280881 | 0           | 0.457817931 | 0           | 0.258861174 | 1.588896405 | 2.828471584 | 0.326794823 |
| ENSMUSG00000067038 | 0.607063399  | 9.17771992   | 3.242645295 | 0.071744713  | 0.999071534 | Rps12-ps3     | Rps12-ps3     | RPS12    | 570.6338527 | 351.7678335 | 483.4265023 | 566.7130463 | 400.5906898 | 320.2262729 | 736.718901  | 685.0906804 | 886.4115668 | 584.4398606 |
| ENSMUSG00000038695 | -0.46860001  | 4.903763954  | 3.238621249 | 0.071921139  | 0.999071534 | Josd2         | Josd2         | JOSD2    | 38.24811828 | 24.19033812 | 36.89148075 | 46.83292192 | 32.43967055 | 29.32315109 | 27.7628609  | 17.47786046 | 15.08518178 | 33.00627707 |
| ENSMUSG00000022120 | 0.480734796  | 3.894029893  | 3.237631581 | 0.0719646    | 0.999071534 | Rnf219        | Rnf219        | RNF219   | 12.98330621 | 9.96072746  | 13.19476319 | 13.59889288 | 14.06155074 | 22.84731872 | 17.73199041 | 14.57639746 | 13.8280833  | 14.83648494 |
| ENSMUSG00000022833 | 0.835157153  | 1.618716768  | 3.237175677 | 0.071984631  | 0.999071534 | Ccdc14        | Ccdc14        | CCDC14   | 2.596661241 | 2.430891821 | 2.086926831 | 2.01208109  | 1.831271725 | 6.403070214 | 4.46535525  | 2.970545453 | 1.492804447 | 3.660102012 |
| ENSMUSG00000015702 | 0.738883659  | 2.644273193  | 3.234752415 | 0.072091199  | 0.999071534 | Anxa9         | Anxa9         | ANXA9    | 3.789721811 | 2.490181865 | 6.260780492 | 6.105625376 | 5.035997243 | 5.311637791 | 6.212668174 | 6.977327692 | 8.17114013  | 9.346331924 |
| ENSMUSG00000026817 | -0.406245816 | 6.543938704  | 3.230998587 | 0.072256616  | 0.999071534 | Ak1           | Ak1           | AK1      | 113.9021944 | 126.5842448 | 123.1960032 | 83.81358471 | 105.5597344 | 98.37444238 | 68.59821109 | 93.39947564 | 45.72695727 | 87.31957658 |
| ENSMUSG00000027820 | -0.635776708 | 9.124114691  | 3.230559297 | 0.072276001  | 0.999071534 | Mme           | Mme           | MME      | 379.0423612 | 1000.045179 | 405.6043276 | 802.6122086 | 931.7902951 | 337.6891916 | 268.0507456 | 669.5471286 | 361.7300881 | 435.6174984 |
| ENSMUSG00000048279 | 0.411957974  | 4.71310388   | 3.228033863 | 0.072387548  | 0.999071534 | Sacs          | Sacs          | SACS     | 22.66815083 | 23.24169741 | 26.38952637 | 18.59440456 | 25.70320671 | 44.89425366 | 30.15732676 | 25.9750021  | 19.72073243 | 26.73181648 |
| ENSMUSG00000049717 | 0.63218935   | 3.710744525  | 3.22647603  | 0.072456449  | 0.999071534 | Lig4          | Lig4          | LIG4     | 8.842684226 | 8.063446039 | 13.53136429 | 13.52951078 | 8.436930446 | 14.62519447 | 9.772009315 | 10.0169556  | 21.5278115  | 17.7763835  |
| ENSMUSG00000028443 | 0.499676987  | 4.806421188  | 3.22057658  | 0.072718012  | 0.999071534 | Nudt2         | Nudt2         | NUDT2    | 26.38769261 | 16.12689208 | 26.86076792 | 22.68794884 | 27.79608868 | 19.2819728  | 32.87536909 | 31.01802112 | 35.19875748 | 34.11737947 |
| ENSMUSG00000032666 | -0.387267404 | 5.384460114  | 3.220549634 | 0.072719209  | 0.999071534 | 1700025G04Rik | 1700025G04Rik | C1orf21  | 52.00340485 | 49.2700269  | 45.17186785 | 43.98825555 | 55.13435943 | 48.82341038 | 37.53487022 | 36.26828751 | 18.77790857 | 37.1892508  |
| ENSMUSG00000031342 | -0.476004442 | 5.344726316  | 3.219978608 | 0.072744581  | 0.999071534 | Gpm6b         | Gpm6b         | GPM6B    | 31.79155519 | 60.71300547 | 55.47186156 | 59.46046531 | 35.57899351 | 38.34565912 | 27.18042326 | 46.90698518 | 25.29910694 | 26.20894477 |
| ENSMUSG00000032113 | 0.566366883  | 3.551687072  | 3.217662217 | 0.072847599  | 0.999071534 | Chek1         | Chek1         | CHEK1    | 9.333944461 | 7.470545595 | 12.31960032 | 9.297202278 | 10.07199449 | 18.19054038 | 14.94923279 | 8.980718811 | 14.53520119 | 10.19599846 |
| ENSMUSG00000090698 | -0.68585577  | 3.94228598   | 3.215378211 | 0.072949331  | 0.999071534 | Apold1        | Apold1        | APOLD1   | 39.16045872 | 15.83044186 | 16.96469553 | 11.58681179 | 14.84638148 | 11.27813504 | 21.03247038 | 11.53676955 | 4.949825271 | 8.496665386 |
| ENSMUSG00000086629 | 0.771994899  | 2.636435536  | 3.208851887 | 0.07324086   | 0.999071534 | 2810403D21Rik | 2810403D21Rik |          | 5.193322482 | 4.150303108 | 5.654889509 | 5.61995063  | 2.616102464 | 4.80230266  | 6.536244641 | 4.697606763 | 10.68533709 | 8.823460208 |
| ENSMUSG00000026420 | 0.746086053  | 2.369295502  | 3.208566972 | 0.073253615  | 0.999071534 | Il24          | Il24          | IL24     | 4.842422314 | 3.438822576 | 3.567971678 | 3.538487434 | 4.185763942 | 3.565345915 | 6.406814054 | 7.529987311 | 3.614158135 | 9.084896066 |
| ENSMUSG00000018909 | -0.474255376 | 5.19671565   | 3.207923621 | 0.073282427  | 0.999071534 | Arrb1         | Arrb1         | ARRB1    | 39.16045872 | 73.87539533 | 35.81435722 | 30.94441952 | 41.79223686 | 39.80090235 | 21.29133155 | 37.09727694 | 20.27071302 | 31.306944   |
| ENSMUSG00000030341 | -0.403982899 | 6.757595609  | 3.206603896 | 0.073341566  | 0.999071534 | Tnfrsf1a      | Tnfrsf1a      | TNFRSF1A | 131.798103  | 153.6797951 | 114.7809757 | 99.00826605 | 142.4467792 | 126.3878746 | 91.50742498 | 102.0347822 | 57.19798091 | 81.17583392 |
| ENSMUSG00000076617 | -0.822055415 | 2.254922585  | 3.202831663 | 0.07351089   | 0.999071534 | Ighm          | Ighm          | IGHM     | 9.544484562 | 5.395394041 | 5.116336746 | 2.428373729 | 8.633138131 | 5.529924276 | 2.070889391 | 2.072473572 | 2.357059653 | 4.575127515 |
| ENSMUSG00000084139 | -2.355285694 | -1.016124243 | 3.201830249 | 0.0735555911 | 0.999071534 | Gm12322       | Gm12322       |          | 0           | 0.592900444 | 1.009803305 | 1.248877918 | 0.196207685 | 0           | 0.388291761 | 0.138164905 | 0           | 0           |

|                     |              |              |             |             |             |               |               |             |             |             |             |             |             |             |             |             |             |             |
|---------------------|--------------|--------------|-------------|-------------|-------------|---------------|---------------|-------------|-------------|-------------|-------------|-------------|-------------|-------------|-------------|-------------|-------------|-------------|
| ENSMUSG00000035561  | -1.328587667 | 0.517372342  | 3.20044854  | 0.073618077 | 0.999071534 | Aldh1b1       | Aldh1b1       | ALDH1B1     | 2.105401006 | 2.193731643 | 1.750325729 | 1.942698983 | 1.569661478 | 2.037340523 | 1.100159989 | 0.138164905 | 0           | 0.588230681 |
| ENSMUSG00000027200  | -0.554294404 | 4.198937782  | 3.200054872 | 0.073635799 | 0.999071534 | Sema6d        | Sema6d        | SEMA6D      | 20.00130956 | 37.29343793 | 23.36011646 | 16.02726661 | 16.21983528 | 27.14028625 | 14.8845175  | 11.19135729 | 10.13535651 | 10.58815225 |
| ENSMUSG00000029428  | -0.420968196 | 5.108915829  | 3.198789722 | 0.073692786 | 0.999071534 | Stx2          | Stx2          | STX2        | 45.05558153 | 44.17108308 | 34.26599215 | 37.39695543 | 43.88511883 | 50.20589145 | 29.31602795 | 26.04408455 | 15.3994564  | 26.53573959 |
| ENSMUSG00000029380  | 0.501340324  | 5.560947811  | 3.197431491 | 0.073754017 | 0.999071534 | Cxcl1         | Cxcl1         | CXCL1       | 58.95122818 | 25.37613901 | 56.95290641 | 30.04245214 | 31.58943725 | 43.00243746 | 64.45643231 | 68.46071032 | 43.68417223 | 43.59442932 |
| ENSMUSG00000041120  | -0.517121831 | 4.442648031  | 3.19670151  | 0.073786949 | 0.999071534 | Nbl1          | Nbl1          | MINOS1-NBL1 | 22.5979708  | 32.55023438 | 20.1960661  | 28.79357422 | 27.73068612 | 19.35473496 | 11.38989165 | 28.39288793 | 11.47102364 | 15.55543355 |
| ENSMUSG00000004709  | -0.930338179 | 1.604069494  | 3.195108912 | 0.07385885  | 0.999071534 | Cd244         | Cd244         | CD244       | 6.73728322  | 5.632554219 | 2.962089695 | 2.567137942 | 1.962076848 | 3.274297269 | 2.006174098 | 1.105319238 | 0.864255206 | 2.745076509 |
| ENSMUSG00000022255  | 0.527456652  | 8.27385839   | 3.192920817 | 0.073957759 | 0.999071534 | Mtdh          | Mtdh          | MTDH        | 262.3329654 | 207.3372853 | 285.5050545 | 303.0610414 | 252.715498  | 319.6441756 | 307.2682134 | 284.8960337 | 474.0832649 | 320.9778747 |
| ENSMUSG00000037012  | -0.485524322 | 6.779106117  | 3.191968612 | 0.074000847 | 0.999071534 | Hk1           | Hk1           | HK1         | 132.3595433 | 194.7085058 | 98.15288126 | 83.46667418 | 160.6286913 | 128.9345502 | 61.41481351 | 112.8116448 | 56.49086302 | 90.7836017  |
| ENSMUSG00000002111  | -0.481814895 | 5.428639821  | 3.186416834 | 0.074252601 | 0.999071534 | Spi1          | Spi1          | SPI1        | 73.26795502 | 41.384451   | 49.48036195 | 43.15567027 | 53.49929539 | 62.72098323 | 46.27143484 | 24.93876531 | 16.81369219 | 30.1958416  |
| ENSMUSG000000069306 | 1.75188598   | -0.317468498 | 3.181062072 | 0.074496294 | 0.999071534 | Hist1h4m      | Hist1h4m      | HIST1H4H    | 0.771980369 | 0.592900444 | 0           | 0           | 0.261610246 | 0.509335131 | 0.323576467 | 1.519813953 | 1.178529826 | 1.372538255 |
| ENSMUSG000000025169 | -0.642601222 | 2.838229225  | 3.175344695 | 0.074757436 | 0.999071534 | Ogfod3        | Ogfod3        | OGFOD3      | 7.439083555 | 10.31646773 | 6.799342255 | 8.880909638 | 10.98763035 | 7.057929668 | 7.116882283 | 5.112101477 | 2.828471584 | 4.901922338 |
| ENSMUSG000000025793 | -0.389046961 | 5.609343566  | 3.173735065 | 0.074831134 | 0.999071534 | Hgs           | Hgs           | HGS         | 55.72294663 | 62.07667649 | 59.98231632 | 45.30651558 | 64.42152317 | 61.62955081 | 27.89229149 | 45.24900632 | 30.56320683 | 41.89509625 |
| ENSMUSG000000058430 | 2.282848526  | 0.259991764  | 3.172500076 | 0.074887731 | 0.999071534 | Rpl27a-ps2    | Rpl27a-ps2    |             | 0           | 1.245090933 | 0           | 0.624438959 | 0           | 0           | 0.453007054 | 4.490359406 | 2.042785033 | 1.176461361 |
| ENSMUSG000000025817 | 0.423317931  | 5.531734992  | 3.172337311 | 0.074895194 | 0.999071534 | Nudt5         | Nudt5         | NUDT5       | 50.81034428 | 34.03248549 | 44.49866565 | 35.24611013 | 40.41878307 | 48.53236174 | 72.80470516 | 35.16296827 | 46.1983692  | 50.84927438 |
| ENSMUSG000000024516 | 0.478260673  | 6.309252955  | 3.171907083 | 0.074914924 | 0.999071534 | Sec11c        | Sec11c        | SEC11C      | 80.63685854 | 47.43203553 | 77.62021405 | 69.72901708 | 67.75705381 | 69.92443722 | 135.0608175 | 60.30898094 | 90.90393395 | 80.71832116 |
| ENSMUSG00000030347  | 0.532274433  | 0.466042639  | 3.166964988 | 0.07514196  | 0.999071534 | D6Wsu163e     | D6Wsu163e     | C12orf4     | 16.49230788 | 12.80664959 | 16.83005509 | 11.86434022 | 12.62269439 | 20.59169171 | 19.8675951  | 11.05319238 | 24.82769501 | 16.60117698 |
| ENSMUSG000000028037 | -0.658302454 | 4.136406046  | 3.162464036 | 0.075349374 | 0.999071534 | Ifi44         | Ifi44         | IFI44       | 15.15888725 | 35.98905696 | 14.60848781 | 21.36968882 | 23.80653242 | 14.26138366 | 5.953807    | 24.10977589 | 11.31388633 | 9.150255031 |
| ENSMUSG000000026821 | -0.46202893  | 4.868119827  | 3.162426057 | 0.075351127 | 0.999071534 | Ralgds        | Ralgds        | RALGDS      | 30.31777449 | 46.42410477 | 31.37122268 | 30.45874478 | 36.62543449 | 32.96125917 | 15.59638573 | 27.4257336  | 13.27810271 | 31.43766193 |
| ENSMUSG000000015094 | -0.383756927 | 5.404780072  | 3.158456838 | 0.075534553 | 0.999071534 | Npdc1         | Npdc1         | NPDC1       | 49.96818388 | 55.73264174 | 39.71893    | 48.28994616 | 54.80734662 | 48.82341038 | 34.6873973  | 36.1301226  | 20.74212495 | 40.45719903 |
| ENSMUSG000000065353 | 0.989096382  | 1.700230567  | 3.156429803 | 0.075628411 | 0.999071534 | Snora73b      | Snora73b      |             | 2.807201342 | 0.948640711 | 2.827449254 | 2.914048475 | 1.308051232 | 1.600767553 | 2.006174098 | 5.112101477 | 4.32127603  | 6.274460592 |
| ENSMUSG000000025358 | 0.390240876  | 5.396400353  | 3.154604749 | 0.075713025 | 0.999071534 | Cdk2          | Cdk2          | CDK2        | 40.14297919 | 29.34857198 | 39.11304802 | 34.48290695 | 45.91259824 | 59.22839948 | 58.43791001 | 38.34076108 | 38.18436638 | 37.77748148 |
| ENSMUSG000000032235 | 0.519400695  | 3.727392956  | 3.153198973 | 0.075778269 | 0.999071534 | Narg2         | Ice2          | ICE2        | 9.333944461 | 12.39161928 | 10.56927459 | 10.82360862 | 12.81890207 | 19.2819728  | 14.04321869 | 10.77686257 | 17.28510412 | 12.74499808 |
| ENSMUSG000000043313 | -1.329675325 | 0.693181821  | 3.152916934 | 0.075791366 | 0.999071534 | Pcdhb19       | Pcdhb19       | PCDHB12     | 0.771980369 | 1.363671021 | 2.625488593 | 3.469105327 | 2.616102464 | 1.746291877 | 1.553167044 | 0.759906976 | 0           | 0.261435858 |
| ENSMUSG000000025889 | 1.159151929  | 0.701537343  | 3.152809296 | 0.075796365 | 0.999071534 | Snca          | Snca          | SNCA        | 0.491260235 | 0.948640711 | 1.279084186 | 0.971349492 | 1.111843547 | 0.436572969 | 1.29430587  | 3.661369977 | 1.885647722 | 2.352922722 |
| ENSMUSG000000039347 | -1.087576758 | 1.43518239   | 3.15115128  | 0.075873413 | 0.999071534 | Atp6vOe2      | Atp6vOe2      | ATP6VOE2    | 3.930081878 | 3.201662398 | 3.298690797 | 4.579219032 | 3.008517833 | 4.29296753  | 2.588611739 | 1.036236786 | 0.392843275 | 0.261435858 |
| ENSMUSG000000021127 | -0.510073943 | 7.312278627  | 3.150098459 | 0.075922382 | 0.999071534 | Zfp36l1       | Zfp36l1       | ZFP36L1     | 148.571131  | 183.3248173 | 220.8776429 | 222.3696515 | 189.2750133 | 118.020226  | 70.28080872 | 152.3268075 | 141.2664419 | 136.1427231 |
| ENSMUSG000000093416 | 1.461292186  | 0.633396589  | 3.149018283 | 0.075972658 | 0.999071534 | Gm18294       | Gm18294       |             | 0.701800335 | 0.474320355 | 2.356207712 | 0           | 0.457817931 | 0.873145938 | 0.711868228 | 1.796143762 | 3.064177549 | 3.202589261 |
| ENSMUSG000000047446 | 0.496852909  | 4.244391326  | 3.148766286 | 0.075984392 | 0.999071534 | Arl4a         | Arl4a         | ARL4A       | 17.05374815 | 13.93316044 | 18.51306059 | 17.20676242 | 14.1269533  | 18.11777822 | 23.10335977 | 21.00106553 | 25.45624425 | 15.88222837 |
| ENSMUSG000000092368 | 0.704390454  | 2.278182516  | 3.147572449 | 0.076040009 | 0.999071534 | A930015D03Rik | A930015D03Rik |             | 5.052962415 | 3.735272798 | 3.096730136 | 3.330341114 | 3.466335765 | 5.675448599 | 8.607134033 | 4.352194501 | 4.32127603  | 5.359435089 |
| ENSMUSG000000041718 | 0.427099746  | 4.473005281  | 3.146511034 | 0.076089494 | 0.999071534 | Alg13         | Alg13         |             | 23.51031124 | 17.13482283 | 18.37842015 | 17.13738032 | 21.84445557 | 27.28581057 | 28.7983056  | 20.03391119 | 23.49202787 | 22.15668897 |
| ENSMUSG000000061474 | 0.490879662  | 5.347908399  | 3.142827378 | 0.076261501 | 0.999071534 | Mrps36        | Mrps36        | MRPS36      | 27.79129328 | 22.53021687 | 41.33461529 | 43.57196291 | 39.04532927 | 31.36049162 | 39.54104432 | 55.95678644 | 48.71256616 | 46.86237755 |
| ENSMUSG000000017417 | -0.524183732 | 5.594581066  | 3.14276928  | 0.076264217 | 0.999071534 | Plxdc1        | Plxdc1        | PLXDC1      | 29.05453389 | 77.13634777 | 50.75944614 | 56.40765262 | 81.94940968 | 39.21880506 | 26.72741621 | 58.30558982 | 22.78490998 | 44.70553172 |
| ENSMUSG000000028803 | -0.962076985 | 1.606228982  | 3.140564981 | 0.07636735  | 0.999071534 | Nipal3        | Nipal3        | NIPAL3      | 2.807201342 | 4.268883197 | 2.558168373 | 6.799446442 | 3.27012808  | 3.201535107 | 2.523896446 | 2.625133191 | 0.942823861 | 0.522871716 |
| ENSMUSG000000025089 | -0.800647303 | 2.464974515  | 3.132162204 | 0.076761869 | 0.999071534 | Gfra1         | Gfra1         | GFRA1       | 6.667103186 | 11.26510844 | 2.558168373 | 8.742145425 | 6.14784079  | 4.319821592 | 2.394465859 | 4.62852431  | 4.399844685 | 3.660102012 |
| ENSMUSG000000014504 | 0.454939329  | 6.291975083  | 3.12686306  | 0.077011795 | 0.999071534 | Srp19         | Srp19         | SRP19       | 67.7939124  | 52.11594903 | 76.81237141 | 83.81358471 | 60.23575923 | 66.9411886  | 100.8911425 | 67.63172089 | 100.7250158 | 88.82283726 |
| ENSMUSG000000090778 | 1.755647072  | 0.118424054  | 3.123263338 | 0.07718207  | 0.999071534 | Gm3235        | Gm3235        |             | 0.210540101 | 0           | 1.413724627 | 0.485674746 | 0.130805123 | 0.218286485 | 0.388291761 | 3.039627905 | 0.785686551 | 2.548999616 |
| ENSMUSG000000032407 | 0.504042535  | 6.805718282  | 3.122844582 | 0.077201905 | 0.999071534 | U2surp        | U2surp        | U2SURP      | 80.77721861 | 82.35387168 | 120.1665933 | 106.3627693 | 88.16265303 | 106.742091  | 72.54584399 | 128.424279  | 162.9513907 | 140.9139275 |
| ENSMUSG000000028673 | -0.382151398 | 5.987969914  | 3.11657394  | 0.077499571 | 0.999071534 | Fuca1         | Fuca1         | FUCA1       | 82.25099931 | 76.3655772  | 68.80126519 | 72.0186266  | 72.85845362 | 73.27149665 | 72.22226752 | 45.66350103 | 35.90587538 | 43.65978829 |
| ENSMUSG000000031931 | 0.730411682  | 2.616757842  | 3.111429752 | 0.077744686 | 0.999071534 | Ankrd49       | Ankrd49       | ANKRD49     | 6.386383052 | 4.98036373  | 2.894769475 | 4.579219032 | 4.643581873 | 8.222124252 | 13.20191987 | 3.937699786 | 5.735511822 | 5.359435089 |

|                    |              |              |             |             |             |               |               |         |             |             |             |             |             |             |             |             |             |             |
|--------------------|--------------|--------------|-------------|-------------|-------------|---------------|---------------|---------|-------------|-------------|-------------|-------------|-------------|-------------|-------------|-------------|-------------|-------------|
| ENSMUSG00000029376 | 0.424657495  | 5.205066753  | 3.107907942 | 0.077912978 | 0.999071534 | Mthfd2l       | Mthfd2l       | MTHFD2L | 24.35247164 | 31.83875385 | 32.91958775 | 34.82981749 | 38.6529139  | 32.67021052 | 38.24673845 | 42.83112048 | 43.44846627 | 41.50294246 |
| ENSMUSG00000028545 | -1.865223913 | -0.777047694 | 3.105556734 | 0.07802555  | 0.999071534 | Bend5         | Bend5         | BEND5   | 0.070180034 | 0.415030311 | 0.538561763 | 1.387642131 | 1.177246109 | 0.363810808 | 0.258861174 | 0           | 0           | 0.326794823 |
| ENSMUSG00000035020 | 0.679492948  | 5.17610687   | 3.100381311 | 0.078273958 | 0.999071534 | Epgn          | Epgn          | EPGN    | 31.01957483 | 44.64540344 | 22.28299293 | 19.35760773 | 27.27286819 | 27.35857273 | 81.15297802 | 69.2206173  | 18.30649664 | 18.16979213 |
| ENSMUSG00000045382 | -0.552026593 | 4.711822319  | 3.100103046 | 0.078287339 | 0.999071534 | Cxcr4         | Cxcr4         | CXCR4   | 39.30081878 | 48.14351606 | 26.92808814 | 19.98204669 | 27.59988099 | 21.90141062 | 30.93391028 | 27.84022831 | 9.899650542 | 12.94107497 |
| ENSMUSG00000025348 | 0.730355774  | 3.284474749  | 3.099811694 | 0.078301351 | 0.999071534 | Itga7         | Itga7         | ITGA7   | 8.491784059 | 6.166164618 | 11.04051614 | 6.175007483 | 5.690022859 | 7.203453991 | 4.594785837 | 13.40199576 | 14.29949523 | 16.2090232  |
| ENSMUSG00000025899 | 0.613671191  | 3.152224617  | 3.099252399 | 0.078328257 | 0.999071534 | Alkbh8        | Alkbh8        | ALKBH8  | 4.56170218  | 7.826285862 | 9.963392611 | 7.909560147 | 5.493815174 | 12.58785394 | 11.84289871 | 11.26043974 | 7.935434165 | 7.908434705 |
| ENSMUSG00000074521 | 2.664466934  | 0.244074337  | 3.098616272 | 0.078358871 | 0.999071534 | Gm14327       | Gm14327       |         | 0.280720134 | 0           | 0           | 1.179495811 | 0           | 0           | 0           | 0.414494714 | 4.085570065 | 3.725460977 |
| ENSMUSG00000093749 | 2.285796803  | -0.797062133 | 3.098327588 | 0.078372768 | 0.999071534 | 4921523L03Rik | 4921523L03Rik |         | 0           | 0           | 0.471241542 | 0.138764213 | 0.196207685 | 0.145524323 | 0.19414588  | 0           | 1.964216377 | 1.111102397 |
| ENSMUSG00000033066 | -0.52494281  | 6.317227756  | 3.096395548 | 0.078465846 | 0.999071534 | Gas7          | Gas7          | GAS7    | 84.00550015 | 118.4615087 | 85.90060116 | 84.99308052 | 115.3701187 | 66.35909131 | 25.62725622 | 101.8275348 | 46.74834978 | 73.79027093 |
| ENSMUSG00000073374 | 0.975813597  | 1.620873841  | 3.094532318 | 0.078555722 | 0.999071534 | C030034I22Rik | C030034I22Rik |         | 2.17558104  | 1.304380977 | 1.817645949 | 2.914048475 | 2.092881971 | 2.473913492 | 1.812028217 | 4.283112048 | 7.149747614 | 2.0261279   |
| ENSMUSG00000028859 | -0.593111951 | 4.436917839  | 3.08956828  | 0.078795711 | 0.999071534 | Csf3r         | Csf3r         | CSF3R   | 50.17872398 | 32.72810451 | 15.68561134 | 15.26406344 | 21.84445557 | 20.08235658 | 23.62108212 | 17.20153065 | 7.6997282   | 16.07830527 |
| ENSMUSG00000070371 | -0.885896386 | 1.119700375  | 3.088176383 | 0.078863145 | 0.999071534 | Prss36        | Prss36        | PRSS36  | 3.859901845 | 2.54947191  | 2.558168373 | 2.358991623 | 2.419894779 | 0.873145938 | 1.812028217 | 1.312566595 | 1.257098482 | 1.503256184 |
| ENSMUSG00000073002 | -0.437240471 | 4.703600698  | 3.087709626 | 0.078885772 | 0.999071534 | Vamp5         | Vamp5         | VAMP5   | 38.38847835 | 29.22999189 | 25.71632417 | 35.87054909 | 25.24538878 | 25.17570789 | 24.98010328 | 17.89235517 | 12.88525944 | 26.99325234 |
| ENSMUSG00000006782 | -0.415082995 | 4.471398516  | 3.083386833 | 0.079095661 | 0.999071534 | Cnp           | Cnp           | CNP     | 28.00183338 | 22.8266671  | 29.21697563 | 22.96547727 | 27.99229636 | 27.21304841 | 15.59638573 | 15.88896405 | 15.63516236 | 18.16979213 |
| ENSMUSG00000090258 | 0.495224103  | 6.202866986  | 3.081467819 | 0.07918903  | 0.999071534 | Churc1        | Churc1        | CHURC1  | 79.3034379  | 41.50303108 | 72.36923687 | 70.70036657 | 51.99503647 | 59.30116164 | 78.69379687 | 63.90126846 | 107.0890769 | 91.43719134 |
| ENSMUSG00000015846 | -0.493690907 | 4.864887024  | 3.081282383 | 0.079198059 | 0.999071534 | Rxra          | Rxra          | RXRA    | 45.26612163 | 41.08800077 | 24.5045602  | 29.07110264 | 36.9524473  | 48.75064822 | 18.05556688 | 16.23437631 | 14.22092657 | 24.77104755 |
| ENSMUSG00000042854 | 0.886151736  | 1.50656143   | 3.079684133 | 0.079275921 | 0.999071534 | Trp53rk       | Trp53rk       | TP53RK  | 3.649361744 | 0.770770577 | 1.481044848 | 1.873316877 | 2.158284533 | 3.565345915 | 4.853647011 | 3.108710358 | 2.749902928 | 2.745076509 |
| ENSMUSG00000074483 | -1.725330947 | -0.194278189 | 3.076868836 | 0.079413275 | 0.999071534 | Bglap         | Bglap         | BGLAP   | 0.842160403 | 0.830060622 | 0           | 3.052812688 | 1.046440986 | 0.218286485 | 0.064715293 | 0.759906976 | 0.235705965 | 0.326794823 |
| ENSMUSG00000091971 | -0.700444828 | 4.408256686  | 3.067721262 | 0.079861344 | 0.999071534 | Hspa1a        | Hspa1a        | HSPA1B  | 20.42238976 | 57.45205303 | 15.41633046 | 9.782877023 | 34.07473459 | 12.6606161  | 10.03807049 | 24.31702324 | 14.14235792 | 14.96720287 |
| ENSMUSG00000030538 | 0.406948111  | 5.569637731  | 3.066670351 | 0.079912994 | 0.999071534 | Cib1          | Cib1          | CIB1    | 48.35404311 | 35.75189678 | 37.83396383 | 39.33965441 | 50.55618011 | 46.05844824 | 73.84014986 | 39.86057503 | 48.08401692 | 50.19568474 |
| ENSMUSG00000035329 | 0.475275438  | 4.713800723  | 3.06352368  | 0.080067862 | 0.999071534 | Fbxo33        | Fbxo33        | FBXO33  | 21.40491023 | 16.71979252 | 21.81175139 | 33.30341114 | 19.16295055 | 31.06944297 | 28.21586796 | 24.73151796 | 34.41307093 | 25.68607305 |
| ENSMUSG00000033420 | -0.500240454 | 5.781826228  | 3.063446783 | 0.080071651 | 0.999071534 | Antxr1        | Antxr1        | ANTXR1  | 36.84451761 | 102.1567465 | 74.32152326 | 74.65514665 | 44.08132652 | 80.03837767 | 37.01714787 | 42.90020294 | 29.62038297 | 57.51604563 |
| ENSMUSG00000025515 | 1.688144204  | 0.540314551  | 3.048657947 | 0.080803889 | 0.999071534 | Muc2          | Muc2          |         | 0.280720134 | 0.355740266 | 1.009803305 | 0.416292639 | 1.24264867  | 0.072762162 | 0           | 4.006782239 | 2.671334273 | 2.483640651 |
| ENSMUSG00000039164 | -0.702857165 | 2.378587601  | 3.047974045 | 0.080837925 | 0.999071534 | Naif1         | Naif1         | NAIF1   | 4.842422314 | 8.122736084 | 8.213066882 | 4.301690606 | 7.194281776 | 6.330308052 | 4.141778783 | 3.246875263 | 1.885647722 | 3.660102012 |
| ENSMUSG00000022369 | 0.451001063  | 4.465311538  | 3.047583058 | 0.08085739  | 0.999071534 | Mtbp          | Mtbp          | MTBP    | 20.28202969 | 14.46677084 | 21.87907161 | 16.79046978 | 23.08710424 | 35.50793482 | 28.21586796 | 19.96482874 | 23.0991846  | 16.79725388 |
| ENSMUSG00000048327 | 0.508613299  | 4.535455994  | 3.046597274 | 0.08090649  | 0.999071534 | Ckap2l        | Ckap2l        | CKAP2L  | 21.1241901  | 15.00038123 | 17.03201575 | 22.54918463 | 22.95629912 | 44.16663204 | 28.34529854 | 14.3691501  | 27.57759794 | 18.16979213 |
| ENSMUSG00000026492 | 0.552125788  | 4.156618886  | 3.04586277  | 0.080943096 | 0.999071534 | Tfb2m         | Tfb2m         | TFB2M   | 15.22906728 | 9.96072746  | 9.76143195  | 18.17811192 | 21.32123508 | 22.92008088 | 31.90463969 | 16.71795348 | 10.52819978 | 21.43774036 |
| ENSMUSG00000078240 | 1.449056905  | -0.13780351  | 3.044392396 | 0.081016428 | 0.999071534 | Gm3550        | Gm3550        | RPL29   | 0.421080201 | 0.237160178 | 0.336601102 | 0.555056852 | 0.654025616 | 0.727621615 | 0.129430587 | 0.759906976 | 2.357059653 | 1.30717929  |
| ENSMUSG00000026399 | -1.053762785 | 2.370086303  | 3.044353841 | 0.081018351 | 0.999071534 | Cd55          | Cd55          | CD55    | 12.98330621 | 15.59328168 | 2.625488593 | 3.122194795 | 1.24264867  | 2.764962138 | 2.070889391 | 5.18118393  | 3.299883514 | 2.091486864 |
| ENSMUSG00000026924 | -0.441843013 | 5.388049824  | 3.042944027 | 0.081088732 | 0.999071534 | Sec16a        | Sec16a        | SEC16A  | 53.19646542 | 65.87123934 | 47.9993171  | 33.30341114 | 50.62158268 | 59.44668596 | 25.69197151 | 41.31130653 | 19.17075184 | 31.306944   |
| ENSMUSG00000098091 | -0.836511378 | 2.717518762  | 3.040373714 | 0.081217218 | 0.999071534 | Gm16470       | Gm16470       |         | 6.596923153 | 12.21374915 | 7.135943356 | 8.256470679 | 8.633138131 | 1.964578361 | 4.724216424 | 9.187966168 | 1.257098482 | 5.032640267 |
| ENSMUSG00000086212 | -2.304479311 | -1.12225973  | 3.04037089  | 0.081217359 | 0.999071534 | Mklin1os      | Mklin1os      |         | 1.333420637 | 0           | 1.077123525 | 0.416292639 | 0           | 0.218286485 | 0.064715293 | 0.069082452 | 0.15713731  | 0           |
| ENSMUSG00000019055 | -0.464905221 | 6.843047306  | 3.038786344 | 0.081296677 | 0.999071534 | Plod1         | Plod1         | PLOD1   | 115.8672354 | 217.0608526 | 113.03065   | 107.1259725 | 139.7652741 | 113.7272585 | 104.2563378 | 124.9701564 | 50.75535119 | 79.28042394 |
| ENSMUSG00000079173 | 1.018952795  | 2.104040818  | 3.038635722 | 0.081304221 | 0.999071534 | Zan           | Zan           | ZAN     | 1.263240604 | 2.490181865 | 4.577774983 | 1.595788451 | 4.447374189 | 2.328389169 | 1.29430587  | 7.737234668 | 4.16413872  | 10.78422914 |
| ENSMUSG00000083933 | 1.39791325   | 1.529140903  | 3.038121818 | 0.081329966 | 0.999071534 | Gm15515       | Gm15515       |         | 1.333420637 | 0.118580089 | 3.298690797 | 2.567137942 | 0.523220493 | 0.582097292 | 0.906014109 | 2.763298096 | 8.485414751 | 4.901922338 |
| ENSMUSG00000035835 | -0.6924792   | 4.712927505  | 3.037642882 | 0.081353967 | 0.999071534 | BC005764      | Plppr3        | PLPPR3  | 27.22985301 | 39.13142931 | 20.06142566 | 35.59302066 | 45.38937775 | 13.09718907 | 5.75966112  | 37.09727694 | 11.86386692 | 27.2546882  |
| ENSMUSG00000097325 | -1.173320871 | 0.994728541  | 3.037286746 | 0.08137182  | 0.999071534 | Gm16897       | Gm16897       |         | 2.526481208 | 0.770770577 | 1.481044848 | 7.146356975 | 1.111843547 | 0.582097292 | 0.970729402 | 1.105319238 | 1.178529826 | 1.503256184 |
| ENSMUSG00000001910 | -0.472488556 | 6.165277341  | 3.035548871 | 0.081458996 | 0.999071534 | Nacc1         | Nacc1         | NACC1   | 98.67312716 | 83.65825266 | 85.42935961 | 69.72901708 | 96.33797323 | 126.4606367 | 51.31922773 | 48.63404649 | 25.45624425 | 55.48976086 |
| ENSMUSG00000019464 | -0.611198503 | 3.495149465  | 3.030750403 | 0.081700223 | 0.999071534 | Ptger1        | Ptger1        | PTGER1  | 12.42186594 | 20.63293545 | 10.70391503 | 10.6154623  | 15.82741991 | 15.42557824 | 8.348272859 | 10.08603805 | 3.457020824 | 7.124127131 |

|                     |              |              |             |             |             |              |          |          |              |             |             |             |             |             |             |             |             |             |
|---------------------|--------------|--------------|-------------|-------------|-------------|--------------|----------|----------|--------------|-------------|-------------|-------------|-------------|-------------|-------------|-------------|-------------|-------------|
| ENSMUSG00000038594  | 1.386957372  | 0.608481821  | 3.02917712  | 0.081779482 | 0.999071534 | Cep85l       | Cep85l   | CEP85L   | 1.052700503  | 1.600831199 | 0.201960661 | 0           | 1.177246109 | 2.037340523 | 2.006174098 | 3.246875263 | 0.31427462  | 2.352922722 |
| ENSMUSG00000024145  | 0.518544984  | 4.064418673  | 3.027880892 | 0.081844846 | 0.999071534 | Pigf         | Pigf     | PIGF     | 12.63240604  | 10.90936817 | 18.8496617  | 13.94580342 | 14.38856355 | 15.64386473 | 25.7566868  | 16.92520084 | 20.34928167 | 13.79074151 |
| ENSMUSG00000055546  | -1.234810832 | 0.953918502  | 3.027633313 | 0.081857337 | 0.999071534 | Timd4        | Timd4    | TIMD4    | 4.280982046  | 2.96450222  | 3.837252559 | 0.555056852 | 1.569661478 | 1.600767553 | 0.776583522 | 1.243484143 | 0           | 1.764692042 |
| ENSMUSG00000028763  | -0.490065436 | 8.111232514  | 3.025218329 | 0.081979286 | 0.999071534 | Hspg2        | Hspg2    | HSPG2    | 234.8223922  | 411.176458  | 303.2775926 | 341.4987284 | 384.1092443 | 327.065916  | 137.7141445 | 227.7648455 | 178.0365725 | 255.5535512 |
| ENSMUSG00000067430  | 0.898314575  | 1.266449099  | 3.024107356 | 0.082035453 | 0.999071534 | Zfp763       | Zfp763   |          | 1.754500839  | 1.185800888 | 1.144443746 | 2.844666369 | 1.24264867  | 3.492583753 | 3.17104938  | 1.519813953 | 2.828471584 | 3.33330719  |
| ENSMUSG00000032496  | 2.779706149  | 0.016358541  | 3.022052481 | 0.082139449 | 0.999071534 | Ltf          | Ltf      | LTF      | 0            | 0           | 0           | 1.040731598 | 0           | 7.931075606 | 0.129430587 | 0.069082452 | 0           | 0.653589645 |
| ENSMUSG00000026020  | 0.516416028  | 7.566654073  | 3.017310103 | 0.082380002 | 0.999071534 | Nop58        | Nop58    | NOP58    | 134.8860245  | 107.8485908 | 237.4384171 | 151.5305207 | 176.5869163 | 214.7211387 | 230.1275836 | 133.8127103 | 253.9338933 | 223.8544534 |
| ENSMUSG00000029922  | -0.372155814 | 5.289557418  | 3.01701496  | 0.082394998 | 0.999071534 | Mkrm1        | Mkrm1    | MKRN1    | 53.40700553  | 47.19487535 | 42.00781749 | 48.42871037 | 36.88704474 | 44.16663204 | 34.16967496 | 30.1890317  | 29.46324566 | 27.12397027 |
| ENSMUSG00000096768  | 0.709790059  | 7.545345318  | 3.016779681 | 0.082406954 | 0.999071534 | Erd1         | Erd1     |          | 133.4122438  | 78.79646902 | 225.186137  | 162.145983  | 132.3093821 | 133.5185664 | 70.41023931 | 228.7319999 | 320.9529561 | 308.0367997 |
| ENSMUSG00000027679  | 0.52400866   | 5.097887714  | 3.016588379 | 0.082416677 | 0.999071534 | Dnajc19      | Dnajc19  | DNAJC19  | 23.79103137  | 18.5577839  | 41.80585683 | 34.41352485 | 25.83401183 | 25.53951869 | 42.32380194 | 31.36343339 | 49.57682137 | 38.3003532  |
| ENSMUSG00000093483  | 0.981644861  | 1.880825497  | 3.016318862 | 0.082430378 | 0.999071534 | AA465934     | AA465934 |          | 3.719541778  | 0.474320355 | 3.029409915 | 2.775284262 | 2.419894779 | 1.964578361 | 3.106334087 | 3.730452429 | 5.578374512 | 7.516280918 |
| ENSMUSG00000020340  | -0.912228454 | 2.094487839  | 3.016040321 | 0.082444539 | 0.999071534 | Cyfp2        | Cyfp2    | CYFIP2   | 6.456563086  | 8.774926572 | 5.250977187 | 2.150845303 | 5.624620297 | 6.766881022 | 3.106334087 | 0.828989429 | 1.099961171 | 3.006512367 |
| ENSMUSG00000052396  | -1.72288261  | -0.593526509 | 3.013462429 | 0.08257573  | 0.999071534 | Mogat2       | Mogat2   | MOGAT2   | 0.210540101  | 1.422961066 | 1.009803305 | 0.901967385 | 0.588623054 | 0.291048646 | 0.258861174 | 0.621742072 | 0           | 0           |
| ENSMUSG00000020090  | 1.330741496  | 1.558825099  | 3.011951455 | 0.08265273  | 0.999071534 | Npffr1       | Npffr1   | NPFFR1   | 1.684320805  | 0.592900444 | 2.423527932 | 3.191576901 | 0.39241537  | 0.800383777 | 1.035444696 | 1.519813953 | 10.44963113 | 3.660102012 |
| ENSMUSG00000054708  | 0.779812478  | 3.111228815  | 3.009570861 | 0.082774203 | 0.999071534 | Ankrd24      | Ankrd24  | ANKRD24  | 7.088183388  | 5.573264174 | 5.183656966 | 3.469105327 | 11.5762534  | 5.093351307 | 5.371369359 | 10.43145031 | 15.24231909 | 13.0717929  |
| ENSMUSG00000021684  | 1.146043249  | 0.641461238  | 3.008653458 | 0.082821066 | 0.999071534 | Pde8b        | Pde8b    | PDE8B    | 0.771980369  | 1.067220799 | 1.750325729 | 0.485674746 | 0.588623054 | 1.236956746 | 0.647152935 | 2.210638477 | 3.299883514 | 1.699333077 |
| ENSMUSG00000038797  | -0.763679082 | 2.191704145  | 3.003185128 | 0.083100996 | 0.999071534 | Zscan2       | Zscan2   | ZSCAN2   | 5.123142449  | 6.106874574 | 4.241173882 | 6.383153803 | 7.063476652 | 3.056010784 | 1.617882337 | 5.664761096 | 2.121353688 | 3.33330719  |
| ENSMUSG00000034329  | 0.592975495  | 3.366237678  | 3.002889545 | 0.083116156 | 0.999071534 | Brip1        | Brip1    | BRIP1    | 7.789983723  | 7.470545595 | 9.76143195  | 5.342422204 | 12.03407133 | 21.82864846 | 13.13720458 | 10.43145031 | 7.85686551  | 8.039152634 |
| ENSMUSG00000040584  | -0.555066269 | 3.832555459  | 3.002339615 | 0.08314437  | 0.999071534 | Abcb1a       | Abcb1a   | ABCB1    | 15.29924731  | 31.83875385 | 13.12744297 | 12.62754339 | 14.58477124 | 13.38823772 | 13.33135046 | 8.220811835 | 8.721120716 | 11.9606905  |
| ENSMUSG00000034161  | 0.520593864  | 4.184984466  | 2.999692329 | 0.083280331 | 0.999071534 | Scx          | Scx      | SCX      | 16.70284798  | 10.5536279  | 17.90717861 | 15.40282765 | 16.41604296 | 15.64386473 | 25.56254092 | 30.1890317  | 11.47102364 | 19.67304832 |
| ENSMUSG00000047786  | 1.371911354  | -0.134653292 | 2.998003198 | 0.083367208 | 0.999071534 | Lix1         | Lix1     | LIX1     | 0.350900168  | 0.355740266 | 0.740522424 | 0.555056852 | 0.261610246 | 1.091432423 | 0.19414588  | 0.621742072 | 1.807079067 | 1.633974113 |
| ENSMUSG00000091694  | -0.980564463 | 1.374472511  | 2.997772545 | 0.083379078 | 0.999071534 | Apol11b      | Apol11b  | APOL1    | 2.105401006  | 3.201662398 | 3.298690797 | 5.550568524 | 2.550699902 | 4.438491853 | 1.553167044 | 0.621742072 | 0.942823861 | 0.980384468 |
| ENSMUSG00000001674  | 0.434014391  | 6.456222178  | 2.99461456  | 0.08354179  | 0.999071534 | Ddx18        | Ddx18    | DDX18    | 84.28622028  | 61.95809641 | 81.45746661 | 90.54364905 | 67.43004101 | 120.2030908 | 82.3825686  | 60.44714584 | 113.453138  | 105.4240097 |
| ENSMUSG00000084333  | -1.070391961 | 1.182962386  | 2.992463636 | 0.083652811 | 0.999071534 | Gm11599      | Gm11599  |          | 3.298461576  | 2.430891821 | 4.914376085 | 2.01208109  | 2.354492217 | 2.328389169 | 2.329750565 | 0.621742072 | 0.078568655 | 1.633974113 |
| ENSMUSG00000030983  | 0.408050651  | 5.790918558  | 2.990393958 | 0.083759789 | 0.999071534 | Bccip        | Bccip    | BCCIP    | 53.68772566  | 41.9180614  | 55.33722112 | 42.46184921 | 53.49929539 | 70.06996155 | 82.83557565 | 35.23205072 | 59.24076594 | 56.27406844 |
| ENSMUSG000000002799 | -0.755779364 | 2.085105222  | 2.989537951 | 0.083804077 | 0.999071534 | Jag2         | Jag2     | JAG2     | 6.246022985  | 7.292675462 | 4.375814322 | 3.330341114 | 5.690022859 | 6.257545891 | 2.78275762  | 2.003391119 | 1.885647722 | 2.483640651 |
| ENSMUSG00000023034  | -0.758093168 | 3.394870408  | 2.988891314 | 0.08383755  | 0.999071534 | Nr4a1        | Nr4a1    | NR4A1    | 20.56274983  | 23.71601776 | 9.222870187 | 5.203657991 | 9.744981678 | 6.475832375 | 4.077063489 | 11.4676871  | 4.478413341 | 10.65351121 |
| ENSMUSG00000020116  | 0.481388257  | 5.985748036  | 2.988299511 | 0.083868197 | 0.999071534 | Pno1         | Pno1     | PNO1     | 62.31986979  | 38.83497909 | 66.91629902 | 49.8163525  | 56.31160553 | 76.18198311 | 113.5753401 | 43.10745029 | 74.0116731  | 46.14342894 |
| ENSMUSG00000093031  | 1.729444982  | 3.089292901  | 2.987627417 | 0.083903017 | 0.999071534 | Gm22662      | Gm22662  |          | 2.456301174  | 0.177870133 | 8.818948865 | 7.285121188 | 1.111843547 | 1.236956746 | 0           | 11.53676955 | 29.54181432 | 13.0717929  |
| ENSMUSG00000085194  | 1.557640354  | -0.044340038 | 2.980000795 | 0.084299231 | 0.999071534 | Gm16012      | Gm16012  | Platr32  | 0.210540101  | 0.296450222 | 0.471241542 | 1.040731598 | 0.196207685 | 0.218286485 | 0.258861174 | 0.759906976 | 2.749902928 | 1.699333077 |
| ENSMUSG00000085655  | 1.497653151  | 0.048103817  | 2.974230907 | 0.084600329 | 0.999071534 | Gm15952      | Gm15952  |          | 0.140360067  | 0.415030311 | 0.201960661 | 1.179495811 | 0.523220493 | 0.509335131 | 0.517722348 | 0.414494714 | 3.064177549 | 1.568615148 |
| ENSMUSG00000040473  | 0.769288363  | 4.422978854  | 2.973933902 | 0.084615859 | 0.999071534 | A330021E2Rik | Cfap69   | CFAP69   | 11.79024564  | 6.759065062 | 18.8496617  | 27.75284262 | 15.63121222 | 10.76879991 | 9.577863435 | 29.42912472 | 35.12018883 | 37.97355838 |
| ENSMUSG00000015812  | 1.207959201  | 1.039700334  | 2.967272748 | 0.084964983 | 0.999071534 | Gnrh1        | Gnrh1    | GNRH1    | 1.684320805  | 0.355740266 | 1.817645949 | 1.179495811 | 1.046440986 | 0.436572969 | 0.776583522 | 2.348803381 | 3.928432755 | 4.771204409 |
| ENSMUSG00000060586  | -0.906652553 | 2.164315784  | 2.966584988 | 0.085001118 | 0.999071534 | H2-Eb1       | H2-Eb1   | HLA-DRB1 | 6.947823321  | 8.597056439 | 6.126140051 | 2.775284262 | 5.166802366 | 6.69411886  | 0.970729402 | 3.315957715 | 0.707117896 | 3.856178906 |
| ENSMUSG00000038112  | 2.504316432  | -0.685633237 | 2.966450071 | 0.085008209 | 0.999071534 | AW551984     | AW551984 | VWASA    | 0            | 0.592900444 | 0           | 0           | 0.130805123 | 0.654859454 | 2.006174098 | 1.4507315   | 0           | 0           |
| ENSMUSG00000050732  | -0.45675415  | 6.813361325  | 2.963168801 | 0.085180854 | 0.999071534 | Vamp8        | Vamp8    | VAMP8    | 198.1884147  | 123.4418725 | 110.4724816 | 135.2257257 | 107.7834215 | 132.1360853 | 131.8897681 | 72.46749256 | 49.3411154  | 84.96665386 |
| ENSMUSG00000016496  | -0.693289613 | 3.993713328  | 2.962880634 | 0.085196034 | 0.999071534 | Cd274        | Cd274    | CD274    | 23.369955117 | 36.40408727 | 16.15685288 | 12.6969255  | 13.21131744 | 9.386318836 | 4.077063489 | 18.23776743 | 9.428238612 | 16.27438216 |
| ENSMUSG00000041445  | -0.458776291 | 4.296492553  | 2.961911151 | 0.085247126 | 0.999071534 | Mmrn2        | Mmrn2    | MMRN2    | 23.4401312   | 27.09555029 | 27.93789144 | 21.36968882 | 17.33167882 | 21.46483765 | 12.16647517 | 11.605852   | 15.00661312 | 19.54233039 |
| ENSMUSG00000034932  | 0.478235149  | 6.322222708  | 2.960367687 | 0.085328535 | 0.999071534 | Mrp154       | Mrp154   | MIRPL54  | 68.0044525   | 47.84706584 | 76.74505119 | 71.94924449 | 81.68779943 | 46.7133077  | 102.5737402 | 101.2057928 | 87.91832505 | 97.25413918 |

|                     |              |              |             |             |             |               |               |            |             |             |             |             |             |              |             |             |             |             |
|---------------------|--------------|--------------|-------------|-------------|-------------|---------------|---------------|------------|-------------|-------------|-------------|-------------|-------------|--------------|-------------|-------------|-------------|-------------|
| ENSMUSG00000030530  | -0.399114387 | 6.954720246  | 2.960264855 | 0.085333962 | 0.999071534 | Furin         | Furin         | FURIN      | 173.1341427 | 175.3206613 | 122.7920819 | 115.7987358 | 147.6135815 | 156.2203608  | 91.83100145 | 107.9758731 | 71.96888807 | 99.21490812 |
| ENSMUSG00000033985  | 0.643801209  | 2.623756649  | 2.958768327 | 0.085412981 | 0.999071534 | Tesk2         | Tesk2         | TESK2      | 4.702062247 | 5.217523908 | 5.250977187 | 2.705902155 | 6.736463844 | 9.168032352  | 5.824376413 | 8.566224097 | 4.949825271 | 7.450921954 |
| ENSMUSG00000023039  | 1.165814306  | 1.674047893  | 2.956991562 | 0.0855069   | 0.999071534 | Krt7          | Krt7          | KRT7       | 0.912340436 | 3.023792265 | 4.241173882 | 0.20814632  | 1.438856355 | 11.20537287  | 1.164875283 | 4.90485412  | 1.728510412 | 3.006512367 |
| ENSMUSG00000042364  | -0.448446526 | 5.057655504  | 2.954683132 | 0.08562909  | 0.999071534 | Snx18         | Snx18         | SNX18      | 40.63423942 | 51.70091872 | 26.45684659 | 37.53571964 | 42.83867785 | 50.35141577  | 27.8275762  | 26.45857927 | 13.8280833  | 22.94099654 |
| ENSMUSG00000000594  | -0.491097002 | 5.696171382  | 2.950686677 | 0.085841077 | 0.999071534 | Gm2a          | Gm2a          | GM2A       | 87.16360166 | 80.45659026 | 49.61500239 | 41.00482497 | 57.61965677 | 78.36484796  | 52.6135336  | 39.86057503 | 20.34928167 | 26.1435858  |
| ENSMUSG00000024376  | 0.535813022  | 3.741949729  | 2.950657696 | 0.085842616 | 0.999071534 | Epb4.1I4a     | Epb41I4a      | EPB41L4A   | 11.64988557 | 11.02794826 | 7.203263577 | 11.03175494 | 15.36960198 | 23.93875114  | 10.09558578 | 19.20492177 | 10.29249382 | 13.92145944 |
| ENSMUSG00000029199  | 0.390360301  | 4.898896835  | 2.949721177 | 0.085892376 | 0.999071534 | Lias          | Lias          | LIA5       | 29.75633422 | 26.02832949 | 26.05292527 | 27.33654998 | 24.13354523 | 29.17762677  | 34.7521126  | 29.42912472 | 31.89887397 | 35.1631229  |
| ENSMUSG00000081034  | -1.133507108 | 0.754381457  | 2.949702687 | 0.085893359 | 0.999071534 | Gm5944        | Gm5944        |            | 2.17558104  | 3.260952442 | 0.471241542 | 2.150845303 | 3.008517833 | 0.436572969  | 0.388291761 | 1.381649048 | 1.099961171 | 1.176461361 |
| ENSMUSG00000031098  | 0.66001922   | 3.732218613  | 2.949000284 | 0.0859307   | 0.999071534 | Syt8          | Syt8          | SYT8       | 8.842684226 | 8.47847635  | 12.18495988 | 12.55816129 | 10.66061754 | 9.022508029  | 6.924536402 | 25.56050739 | 18.46363395 | 14.64040805 |
| ENSMUSG00000034708  | -0.464449746 | 9.224339458  | 2.945462308 | 0.086119054 | 0.999071534 | Grn           | Grn           | GRN        | 669.5877    | 745.9280487 | 651.390452  | 708.1831615 | 826.2959632 | 606.6909028  | 438.1872521 | 647.5789087 | 250.5554411 | 529.7997663 |
| ENSMUSG00000083705  | 0.920104345  | 3.279789725  | 2.944639253 | 0.086162936 | 0.999071534 | Gm8624        | Gm8624        |            | 2.456301174 | 4.802493597 | 16.29149332 | 4.509836926 | 6.344048475 | 3.638108076  | 8.154126978 | 13.81649048 | 20.74212495 | 9.803844676 |
| ENSMUSG00000027227  | -0.422189366 | 5.093908497  | 2.942813457 | 0.086260365 | 0.999071534 | Sord          | Sord          | SORD       | 34.59875654 | 53.0052997  | 28.34181276 | 37.25819122 | 49.50973913 | 29.54143758  | 37.98787727 | 28.32380548 | 17.04939816 | 28.82330335 |
| ENSMUSG00000029119  | -0.53273892  | 4.915048103  | 2.942302585 | 0.086287648 | 0.999071534 | Man2b2        | Man2b2        | MAN2B2     | 35.44091694 | 62.66957694 | 23.42743668 | 23.65929833 | 40.48418563 | 33.68888078  | 30.22204205 | 27.21848624 | 8.956826681 | 22.41812483 |
| ENSMUSG00000024974  | 0.40379959   | 6.23501477   | 2.939917104 | 0.086415168 | 0.999071534 | Smc3          | Smc3          | SMC3       | 50.17872398 | 71.44450351 | 72.03263577 | 68.8270497  | 72.98925874 | 91.46203703  | 71.445684   | 66.11190694 | 99.4671735  | 77.90788569 |
| ENSMUSG00000040883  | -0.605724777 | 3.33081948   | 2.938824786 | 0.086473627 | 0.999071534 | Tmem205       | Tmem205       | TMEM205    | 13.96582667 | 9.130666839 | 11.10783636 | 16.44355925 | 11.18383803 | 5.020589145  | 5.824376413 | 8.35897674  | 7.85686551  | 9.934562605 |
| ENSMUSG000000006457 | -2.494326612 | -0.796081891 | 2.934063671 | 0.086728937 | 0.999071534 | Actn3         | Actn3         | ACTN3      | 2.877381375 | 0           | 1.077123525 | 0           | 0           | 0.0727262162 | 0.129430587 | 0.27632981  | 0           | 0.130717929 |
| ENSMUSG000000091509 | 0.847570132  | 5.161595671  | 2.933628641 | 0.086752306 | 0.999071534 | Gm17066       | Gm17066       |            | 12.562226   | 10.31646773 | 49.68232261 | 37.53571964 | 20.53640434 | 16.0804377   | 17.37296925 | 44.6963467  | 80.69000879 | 46.2087879  |
| ENSMUSG000000003882 | -1.102613365 | 1.837492205  | 2.932045284 | 0.086837417 | 0.999071534 | Il7r          | Il7r          | IL7R       | 4.912602348 | 11.85800888 | 4.443134543 | 0.485674746 | 2.87771271  | 2.110102684  | 1.035444696 | 4.490359406 | 1.492804447 | 1.30717929  |
| ENSMUSG00000036815  | 1.050055023  | 1.332638463  | 2.930467148 | 0.086922338 | 0.999071534 | Dpp10         | Dpp10         | DPP10      | 0.701800335 | 1.600831199 | 3.029409915 | 0.485674746 | 2.354492217 | 1.45524323   | 2.070889391 | 2.694215643 | 5.342668547 | 3.137230296 |
| ENSMUSG00000025877  | -0.540396744 | 4.338206185  | 2.925339455 | 0.087198884 | 0.999071534 | Hk3           | Hk3           | HK3        | 33.19515587 | 30.00076247 | 15.95489222 | 24.42250151 | 20.20939153 | 25.9709166   | 11.77818341 | 17.47786046 | 5.971217787 | 21.04558657 |
| ENSMUSG00000059493  | -0.681986098 | 3.073766179  | 2.925183743 | 0.087207297 | 0.999071534 | Nhs           | Nhs           | NHS        | 5.263502516 | 9.96072746  | 15.68561134 | 13.52951078 | 8.044515076 | 6.548594537  | 4.335924663 | 5.526596192 | 8.092571475 | 5.490153018 |
| ENSMUSG00000033124  | -0.477967828 | 4.325033897  | 2.920222421 | 0.087475805 | 0.999071534 | Atg9a         | Atg9a         | ATG9A      | 25.47535218 | 26.26548967 | 19.25358302 | 23.86744465 | 25.57240158 | 25.39399437  | 15.8552469  | 21.34647779 | 6.914041649 | 13.59466462 |
| ENSMUSG00000025903  | 0.400306552  | 5.80106606   | 2.916326835 | 0.087687264 | 0.999071534 | Lypla1        | Lypla1        | LYPLA1     | 56.14402683 | 42.9852822  | 43.3542219  | 45.65342611 | 61.41300534 | 68.46919399  | 86.84792385 | 43.93643972 | 59.00050598 | 46.33950583 |
| ENSMUSG00000022055  | -1.250669558 | 0.631128813  | 2.914542591 | 0.0877843   | 0.999071534 | Nefl          | Nefl          | NEFL       | 1.473780704 | 2.608761954 | 1.009803305 | 2.01208109  | 3.204725518 | 0.582097292  | 0.064715293 | 1.934308667 | 0.235705965 | 1.176461361 |
| ENSMUSG00000025979  | 0.443065337  | 6.937992937  | 2.912972398 | 0.087869791 | 0.999071534 | Mob4          | Mob4          | MOB4       | 109.6212124 | 86.3855947  | 112.0881669 | 116.6313211 | 113.2118341 | 89.49745867  | 164.1179843 | 133.467298  | 138.6736762 | 138.2995689 |
| ENSMUSG000000052160 | -0.667674548 | 5.744455863  | 2.911473146 | 0.087951504 | 0.999071534 | Plid4         | Plid4         | PLD4       | 107.0947312 | 72.45243427 | 46.72023292 | 53.21607572 | 63.11347194 | 109.2887666  | 51.83695008 | 16.92520084 | 12.2567102  | 27.51612406 |
| ENSMUSG000000069601 | 0.656608986  | 5.412676558  | 2.911282235 | 0.087961915 | 0.999071534 | Ank3          | Ank3          | ANK3       | 22.73833087 | 21.2258359  | 47.79735644 | 38.02139439 | 40.68039331 | 26.63095112  | 17.02012219 | 59.34182661 | 67.3333742  | 68.23475894 |
| ENSMUSG000000063108 | 0.508704585  | 3.500569286  | 2.910945232 | 0.087980297 | 0.999071534 | Zfp26         | Zfp26         |            | 8.070703857 | 10.19788764 | 10.56927459 | 8.533999106 | 10.59521498 | 15.71662689  | 11.32517636 | 15.12905707 | 10.92104306 | 10.52279329 |
| ENSMUSG00000027078  | -0.367976803 | 5.292135276  | 2.908230633 | 0.088128511 | 0.999071534 | Ube2I6        | Ube2I6        | UBE2L6     | 60.91626911 | 45.83120433 | 43.89278366 | 34.9685817  | 43.81971627 | 43.51177259  | 36.56414082 | 32.67599998 | 21.84208612 | 32.74484122 |
| ENSMUSG000000087660 | 1.438911586  | 1.661746142  | 2.90673828  | 0.088210108 | 0.999071534 | B230398E01Rik | B230398E01Rik |            | 1.824680872 | 0.237160178 | 3.90457278  | 1.179495811 | 1.504258917 | 0.873145938  | 0.970729402 | 0.967154334 | 14.29949523 | 1.503256184 |
| ENSMUSG00000038822  | 0.406276042  | 4.691002623  | 2.906030012 | 0.088248862 | 0.999071534 | Hace1         | Hace1         | HACE1      | 23.79103137 | 21.64086621 | 22.68691426 | 19.63513615 | 27.27286819 | 23.57494033  | 27.95700678 | 34.12673148 | 24.12057712 | 29.93440574 |
| ENSMUSG000000053332 | 0.482581573  | 7.649612607  | 2.90008453  | 0.088574908 | 0.999071534 | Gas5          | Gas5          |            | 144.360329  | 162.9883321 | 211.6547728 | 172.6920632 | 175.9982933 | 147.6344257  | 196.4109157 | 255.9504861 | 211.6639568 | 291.4356227 |
| ENSMUSG000000021537 | 0.415810345  | 6.355950537  | 2.8982171   | 0.088677585 | 0.999071534 | Cetn3         | Cetn3         | CETN3      | 72.63633472 | 58.3414037  | 68.06074277 | 83.46667418 | 80.3797482  | 71.30691829  | 132.1486293 | 75.85253273 | 75.81875217 | 91.63326824 |
| ENSMUSG000000033763 | -0.457443209 | 5.244140346  | 2.897008167 | 0.088744125 | 0.999071534 | Mtss1I        | Mtss1I        | MTSS1L     | 38.87973858 | 70.97018316 | 34.19867193 | 31.63824059 | 52.4528544  | 54.2805725   | 25.04481858 | 34.33397884 | 19.56359512 | 25.55355512 |
| ENSMUSG000000093548 | -1.387031854 | -0.252414952 | 2.896808507 | 0.08875512  | 0.999071534 | Gm6407        | Gm6407        |            | 1.473780704 | 1.245090933 | 0.403921322 | 1.179495811 | 0.981038424 | 0.145524323  | 0.582437641 | 0.345412262 | 0.628549241 | 0.065358965 |
| ENSMUSG00000038539  | -0.422349155 | 5.342492113  | 2.895552853 | 0.088824298 | 0.999071534 | Atf5          | Atf5          | ATF5       | 46.88026241 | 60.89087561 | 42.41173882 | 37.53571964 | 53.69550307 | 58.93735083  | 25.17424916 | 40.55139956 | 18.85647722 | 29.34617506 |
| ENSMUSG000000057286 | -1.154487677 | 0.7373824    | 2.894525664 | 0.088880933 | 0.999071534 | St6galnac2    | St6galnac2    | ST6GALNAC2 | 2.456301174 | 2.075151554 | 2.086926831 | 1.873316877 | 2.485297341 | 2.037340523  | 0.841298815 | 0           | 1.099961171 | 0.71894861  |
| ENSMUSG00000032740  | 0.523932578  | 6.648290561  | 2.89433584  | 0.088891403 | 0.999071534 | Ccdc88a       | Ccdc88a       | CCDC88A    | 56.42474697 | 81.76097124 | 109.5973187 | 89.57229955 | 87.90104278 | 85.93211276  | 68.40406521 | 117.3020042 | 167.9797846 | 104.5089842 |
| ENSMUSG00000023274  | -1.034746273 | 1.356534069  | 2.89384316  | 0.088918585 | 0.999071534 | Cd4           | Cd4           | CD4        | 4.35116208  | 6.818355107 | 1.683005509 | 1.595788451 | 2.550699902 | 3.419821592  | 1.100159989 | 2.072473572 | 0.235705965 | 1.30717929  |

|                      |              |              |             |             |             |               |               |             |  |  |             |             |             |             |             |             |             |             |             |             |
|----------------------|--------------|--------------|-------------|-------------|-------------|---------------|---------------|-------------|--|--|-------------|-------------|-------------|-------------|-------------|-------------|-------------|-------------|-------------|-------------|
| ENSMUSG00000075010   | -0.50201668  | 4.836313333  | 2.893655984 | 0.088928914 | 0.999071534 | AW112010      | AW112010      |             |  |  | 50.52962415 | 41.79948131 | 24.43723998 | 25.25508678 | 31.98185262 | 26.19437815 | 10.8721693  | 22.65904439 | 22.3920667  | 30.78407228 |
| ENSMUSG000000026104  | -0.451848729 | 7.122819671  | 2.889151017 | 0.089177907 | 0.999071534 | Stat1         | Stat1         | STAT1       |  |  | 209.0663199 | 202.5940817 | 113.2999308 | 154.5139513 | 157.5547709 | 158.0394148 | 69.63365578 | 121.3778689 | 87.76118774 | 138.2342099 |
| ENSMUSG000000085687  | 1.24945003   | 1.003145418  | 2.886816451 | 0.089307238 | 0.999071534 | Gm16153       | Gm16153       |             |  |  | 1.052700503 | 0.474320355 | 0.942483085 | 2.358991623 | 0.915635862 | 1.164194584 | 0.19414588  | 2.694215643 | 5.185531236 | 2.679717545 |
| ENSMUSG000000026047  | 0.399041632  | 4.966502221  | 2.886552708 | 0.089321861 | 0.999071534 | Kdelc1        | Kdelc1        | KDEL1       |  |  | 29.26507399 | 27.33271047 | 28.4764532  | 22.2716562  | 32.57047567 | 33.68888078 | 49.50719951 | 30.39627905 | 22.07779208 | 36.40494323 |
| ENSMUSG000000034135  | -0.455069453 | 4.953745938  | 2.886254348 | 0.089338408 | 0.999071534 | Slk3          | Slk3          | SIK3        |  |  | 43.44144076 | 48.97357668 | 26.92808814 | 26.71211102 | 40.28797794 | 45.40358879 | 23.23279036 | 29.01463001 | 13.43524002 | 19.54233039 |
| ENSMUSG000000032530  | 1.112109488  | 0.20348773   | 2.884503283 | 0.089435584 | 0.999071534 | Lyd4          | Lyd4          | LYZL4       |  |  | 0.280720134 | 0.889350666 | 0.875162864 | 0.555056852 | 0.719428178 | 1.746291877 | 2.006174098 | 1.105319238 | 0.549980586 | 1.503256184 |
| ENSMUSG000000065126  | 1.458674306  | -0.04372621  | 2.883537473 | 0.089489231 | 0.999071534 | Snord104      | Snord104      | SNORD104    |  |  | 0.210540101 | 0.059290044 | 0.471241542 | 1.179495811 | 0.39241537  | 1.600767553 | 0.453007054 | 0.483577167 | 2.357059653 | 0.980384468 |
| ENSMUSG000000001376  | 0.352885769  | 5.71338901   | 2.883220482 | 0.089506846 | 0.999071534 | Ccdc132       | Vps50         | VPS50       |  |  | 46.81008237 | 49.15144681 | 52.10585054 | 44.95960504 | 45.52018287 | 66.43185347 | 56.04344415 | 44.21276953 | 59.47647191 | 55.4244019  |
| ENSMUSG000000020061  | -3.085865677 | -0.834074383 | 2.881393887 | 0.089608423 | 0.999071534 | Mybpc1        | Mybpc1        | MYBPC1      |  |  | 2.245761073 | 0           | 1.750325729 | 0           | 0           | 0           | 0           | 0           | 0           | 0.392153787 |
| ENSMUSG000000041488  | 0.504529625  | 4.10816495   | 2.88130012  | 0.089613641 | 0.999071534 | Stx3          | Stx3          | STX3        |  |  | 12.98330621 | 16.00831199 | 17.57057751 | 14.50086027 | 12.23027902 | 17.09910796 | 15.8552469  | 23.76436362 | 23.72773384 | 13.72538255 |
| ENSMUSG000000097277  | 0.845855481  | 1.583076509  | 2.878555983 | 0.089766488 | 0.999071534 | 2900076A07Rik | 2900076A07Rik |             |  |  | 1.754500839 | 1.956571465 | 3.231370576 | 1.734552664 | 1.962076848 | 1.8918162   | 2.459181152 | 5.18118393  | 2.907040239 | 4.967281302 |
| ENSMUSG000000056260  | 0.507155893  | 4.598193513  | 2.878296279 | 0.089780968 | 0.999071534 | Lrif1         | Lrif1         | LRF1        |  |  | 14.87816711 | 15.23754141 | 25.58168373 | 25.94890785 | 20.99422227 | 19.35473496 | 20.32060215 | 30.1890317  | 30.01322625 | 32.74484122 |
| ENSMUSG000000024425  | -0.427375811 | 6.989501458  | 2.878114847 | 0.089791085 | 0.999071534 | Ndfip1        | Ndfip1        | NDFIP1      |  |  | 150.1852718 | 181.9018562 | 127.2352164 | 142.5108469 | 154.8732659 | 125.0781557 | 160.0409208 | 98.64974202 | 59.63360922 | 88.7574738  |
| ENSMUSG000000026112  | -0.394862523 | 6.063218863  | 2.876397398 | 0.089886919 | 0.999071534 | Coa5          | Coa5          | COA5        |  |  | 78.11037733 | 89.88370732 | 69.47446739 | 72.64306556 | 84.04229165 | 96.6281505  | 60.44408411 | 57.89109511 | 30.48463818 | 43.39835243 |
| ENSMUSG0000000073791 | 0.582978152  | 3.491156845  | 2.87428389  | 0.090005004 | 0.999071534 | Efcab7        | Efcab7        | EFCA7       |  |  | 12.49204597 | 6.106874574 | 9.088229746 | 7.701413827 | 10.98763035 | 10.91432423 | 19.22044216 | 10.91502748 | 13.1209654  | 9.150255031 |
| ENSMUSG000000000600  | 0.397443722  | 5.182483716  | 2.872921109 | 0.090081235 | 0.999071534 | Krit1         | Krit1         | KRIT1       |  |  | 35.37073691 | 24.84252861 | 32.31370576 | 30.66689109 | 39.11073183 | 35.87174563 | 32.81065379 | 38.34076108 | 41.09140662 | 47.05845444 |
| ENSMUSG000000041954  | -0.999027614 | 1.105130458  | 2.872062967 | 0.090129273 | 0.999071534 | Tnfrsf18      | Tnfrsf18      | TNFRSF18    |  |  | 6.246022985 | 1.304380977 | 2.558168373 | 1.665170557 | 2.289089656 | 2.619437815 | 1.876743511 | 0.828989429 | 0.549980586 | 0.915025503 |
| ENSMUSG000000020689  | -0.582008192 | 4.956204861  | 2.871710204 | 0.090149028 | 0.999071534 | Itgb3         | Itgb3         | RP11-290H.2 |  |  | 48.28386308 | 71.32592342 | 26.38952637 | 26.15705417 | 21.19042996 | 43.14796178 | 29.89465559 | 14.30006765 | 11.47102364 | 26.27430373 |
| ENSMUSG000000096111  | 1.919054299  | -0.554846235 | 2.871643366 | 0.090152772 | 0.999071534 | Gm21917       | Gm21917       |             |  |  | 0           | 0.118580089 | 0           | 0.624438959 | 0.457817931 | 0.436572969 | 0.064715293 | 1.381649048 | 1.728510412 | 0.457512752 |
| ENSMUSG000000083773  | -0.70847397  | 10.46583925  | 2.871252267 | 0.090174681 | 0.999071534 | Gm13394       | Gm13394       |             |  |  | 1391.108625 | 3013.416507 | 1382.218764 | 1084.026033 | 2307.140763 | 1178.310444 | 981.2132797 | 1822.947754 | 183.3006723 | 1169.990824 |
| ENSMUSG000000027905  | 0.413317867  | 4.803173181  | 2.869528241 | 0.090271327 | 0.999071534 | Ddx20         | Ddx20         | DDX20       |  |  | 32.8442557  | 23.8938879  | 23.42743668 | 17.9699656  | 26.2264272  | 44.09386988 | 37.3166679  | 25.14601267 | 29.14897104 | 22.41812483 |
| ENSMUSG000000040586  | 0.432404606  | 4.36126001   | 2.868270337 | 0.090341914 | 0.999071534 | Ofd1          | Ofd1          | OFD1        |  |  | 14.87816711 | 17.60914319 | 18.91698192 | 19.14946141 | 19.48996336 | 24.81189708 | 15.59638573 | 23.76436362 | 22.54920401 | 25.55355512 |
| ENSMUSG000000052142  | -0.712372504 | 2.641864476  | 2.867774021 | 0.090369782 | 0.999071534 | Rasa13        | Rasa13        | RASAL3      |  |  | 11.01826527 | 8.952796705 | 5.99149961  | 5.411804311 | 8.240722761 | 10.4049891  | 3.235764674 | 3.385040167 | 1.885647722 | 4.836563373 |
| ENSMUSG000000082322  | -1.28735556  | 0.031364623  | 2.867708056 | 0.090373486 | 0.999071534 | Gm9164        | Gm9164        |             |  |  | 0.561440268 | 0.948640711 | 1.211763966 | 2.358991623 | 1.373453794 | 0.363810808 | 0.388291761 | 0.621742072 | 0.864255206 | 0.130717929 |
| ENSMUSG000000042797  | 1.241912578  | 0.595714492  | 2.861212944 | 0.090739052 | 0.999071534 | Aqp11         | Aqp11         | AQP11       |  |  | 1.263240604 | 0.474320355 | 0.673202203 | 1.387642131 | 0.457817931 | 0.291048646 | 0.711868228 | 1.796143762 | 2.435628308 | 3.725460977 |
| ENSMUSG000000000958  | -0.497635306 | 4.311581826  | 2.858379027 | 0.090899057 | 0.999071534 | Slc7a7        | Slc7a7        | SLC7A7      |  |  | 30.03705436 | 24.78323856 | 22.75423448 | 20.39833933 | 22.23687094 | 25.03018356 | 25.7566868  | 11.39860464 | 8.092571475 | 11.50317775 |
| ENSMUSG000000064366  | 1.026384847  | 4.072807124  | 2.856649239 | 0.090996873 | 0.999071534 | mt-Tl2        | mt-Tl2        |             |  |  | 10.456825   | 3.438822576 | 10.77123525 | 24.83879414 | 6.474853598 | 6.039259406 | 6.795105815 | 12.22759407 | 54.68378395 | 16.33974113 |
| ENSMUSG000000085741  | 0.738478397  | 2.750125131  | 2.855821528 | 0.091043718 | 0.999071534 | 5430405H02Rik | 5430405H02Rik |             |  |  | 5.684582717 | 4.565333419 | 5.789538949 | 5.342422204 | 4.251166504 | 4.001918884 | 4.012348196 | 7.875399573 | 8.092571475 | 14.64040805 |
| ENSMUSG000000026767  | 0.401738333  | 5.035955445  | 2.853552705 | 0.09117226  | 0.999071534 | Fam188a       | Fam188a       | FAM188A     |  |  | 26.80877281 | 33.49887509 | 27.803251   | 28.72419211 | 29.30034759 | 39.29156722 | 56.30230533 | 29.42912472 | 24.74912636 | 31.43766193 |
| ENSMUSG000000036908  | -0.369199816 | 6.286762528  | 2.851919722 | 0.0912649   | 0.999071534 | Unc93b1       | Unc93b1       | UNC93B1     |  |  | 103.5857295 | 97.53212305 | 80.11106221 | 82.77285311 | 93.00244259 | 107.8335234 | 59.14977824 | 68.25346297 | 40.22715141 | 63.00604178 |
| ENSMUSG000000027405  | 0.529525952  | 8.014478915  | 2.8515804   | 0.091284162 | 0.999071534 | Nop56         | Nop56         | NOP56       |  |  | 246.4020978 | 108.8565215 | 303.0083118 | 237.009276  | 199.2816052 | 310.6216675 | 296.8490512 | 189.0095897 | 333.2096663 | 323.3307974 |
| ENSMUSG000000078867  | 0.843510179  | 1.805480723  | 2.849836623 | 0.091383223 | 0.999071534 | Gm14418       | Gm14418       | ZNF788      |  |  | 1.684320805 | 4.802493597 | 2.423527932 | 1.942698983 | 1.63506404  | 2.619437815 | 7.248111287 | 3.868617334 | 3.064177549 | 3.856178906 |
| ENSMUSG000000027360  | -0.996014494 | 2.639829092  | 2.849056336 | 0.091427587 | 0.999071534 | Hdc           | Hdc           | HDC         |  |  | 16.49230788 | 15.53399163 | 6.462741153 | 0.971349492 | 3.27012808  | 5.893735083 | 7.312828163 | 2.556050739 | 2.121353688 | 2.352922722 |
| ENSMUSG000000022831  | -0.622121737 | 5.20521229   | 2.848333683 | 0.091468696 | 0.999071534 | Hcls1         | Hcls1         | HCLS1       |  |  | 74.18029545 | 54.54684085 | 37.69932339 | 29.34863107 | 37.21405755 | 78.2920858  | 27.63343032 | 13.81649048 | 12.64955347 | 19.34625349 |
| ENSMUSG000000035834  | 0.649541519  | 2.760696449  | 2.844007826 | 0.091715194 | 0.999071534 | Polr3g        | Polr3g        | POLR3G      |  |  | 2.737021308 | 5.039653775 | 5.587578288 | 6.03624327  | 7.39048946  | 7.931075606 | 8.671849326 | 6.493750525 | 8.799689371 | 6.731973344 |
| ENSMUSG000000027079  | 0.497021347  | 3.511640523  | 2.839056847 | 0.091998199 | 0.999071534 | Clp1          | Clp1          | CLP1        |  |  | 9.755024662 | 11.44297857 | 10.50195437 | 7.493267507 | 9.483371431 | 15.06176744 | 14.23736457 | 13.74740803 | 8.32827744  | 13.0717929  |
| ENSMUSG000000097507  | 1.355117181  | 0.753819778  | 2.839006579 | 0.092001077 | 0.999071534 | Gm26538       | Gm26538       |             |  |  | 0.280720134 | 0.474320355 | 2.288887492 | 1.248877918 | 0.261610246 | 1.091432423 | 0.323576467 | 1.72706131  | 5.028393926 | 1.895409971 |
| ENSMUSG000000021457  | -0.53585908  | 4.469478449  | 2.837612413 | 0.092080943 | 0.999071534 | Syk           | Syk           | SYK         |  |  | 41.26585972 | 35.57402664 | 19.32090324 | 17.90058349 | 22.17146838 | 35.72622131 | 19.8028798  | 13.95465538 | 9.428238612 | 12.28748533 |
| ENSMUSG000000027208  | 0.853271347  | 1.445556736  | 2.835378926 | 0.092209048 | 0.999071534 | Fgf7          | Fgf7          | FGF7        |  |  | 0.912340436 | 1.719411288 | 2.558168373 | 2.081463196 | 2.289089656 | 2.692199976 | 2.070889391 | 2.832380548 | 2.985608894 | 5.359435089 |

|                    |              |              |             |             |             |               |            |            |             |             |             |             |             |             |             |             |             |             |
|--------------------|--------------|--------------|-------------|-------------|-------------|---------------|------------|------------|-------------|-------------|-------------|-------------|-------------|-------------|-------------|-------------|-------------|-------------|
| ENSMUSG00000023927 | -1.062400027 | 0.538788096  | 2.834369481 | 0.09226701  | 0.999071534 | Satb1         | Satb1      | SATB1      | 3.158101509 | 1.245090933 | 0.673202203 | 2.150845303 | 2.027479409 | 1.45524323  | 0.906014109 | 0.345412262 | 0.707117896 | 0.784307574 |
| ENSMUSG00000017830 | -0.649371919 | 3.110149485  | 2.832914876 | 0.092350602 | 0.999071534 | Dhx58         | Dhx58      | DHX58      | 9.825204696 | 9.367827016 | 15.2143698  | 9.158438064 | 10.33360473 | 11.42365936 | 3.235764674 | 5.941090906 | 3.142746204 | 9.477049853 |
| ENSMUSG00000055322 | -0.544590474 | 4.85695178   | 2.830583341 | 0.09248476  | 0.999071534 | Tns1          | Tns1       | TNS1       | 22.73833087 | 55.55477161 | 35.47775612 | 31.01380163 | 32.96289104 | 43.73005907 | 12.68419752 | 27.84022831 | 9.663944577 | 24.83640651 |
| ENSMUSG00000044390 | 0.8376108    | 1.725307146  | 2.830382167 | 0.092496346 | 0.999071534 | Tigd3         | Tigd3      | TIGD3      | 2.17558104  | 1.48225111  | 2.086926831 | 3.607869541 | 2.419894779 | 3.34705943  | 2.912188207 | 2.694215643 | 6.364061063 | 3.594743048 |
| ENSMUSG00000033105 | 0.44539049   | 4.326687345  | 2.829920182 | 0.092522958 | 0.999071534 | Lss           | Lss        | LSS        | 20.70310989 | 13.45884008 | 13.86796539 | 18.45564034 | 21.19042996 | 31.5787781  | 16.04939278 | 22.38271458 | 21.99922343 | 19.41161246 |
| ENSMUSG00000097645 | 1.6203174    | -0.435644385 | 2.826120242 | 0.092742162 | 0.999071534 | Gm26863       | Gm26863    |            | 0.140360067 | 0           | 0.538561763 | 0.555056852 | 0.327012808 | 0.145524323 | 0.906014109 | 1.174401691 | 1.571373102 | 0.457512752 |
| ENSMUSG00000051439 | -0.479793742 | 6.296057418  | 2.824544814 | 0.092833208 | 0.999071534 | Cd14          | Cd14       | CD14       | 248.6478588 | 184.1548779 | 103.6731393 | 91.16808801 | 112.6232111 | 97.35577212 | 116.6816741 | 113.4333868 | 66.78335683 | 96.92734436 |
| ENSMUSG00000064365 | 1.097085626  | 4.672692774  | 2.824352961 | 0.092844302 | 0.999071534 | mt-Ts2        | mt-Ts2     |            | 13.33420637 | 3.379532531 | 17.03201575 | 38.99274388 | 9.221761185 | 6.912405345 | 6.924536402 | 17.2706131  | 82.02567592 | 35.16312229 |
| ENSMUSG00000037944 | -0.954524461 | 1.577583587  | 2.822782943 | 0.092935144 | 0.999071534 | Ccr7          | Ccr7       | CCR7       | 6.667103186 | 6.344034752 | 1.615685288 | 3.469105327 | 1.438856355 | 2.328389169 | 0.906014109 | 1.174401691 | 1.964216377 | 2.941153403 |
| ENSMUSG00000085334 | 0.775334637  | 4.756535934  | 2.81932185  | 0.093135745 | 0.999071534 | Gm12940       | Gm12940    |            | 14.03600671 | 13.51813012 | 26.7934477  | 26.15705417 | 21.84445557 | 9.677367482 | 8.477703446 | 39.72241013 | 48.63399751 | 46.79701859 |
| ENSMUSG00000060538 | -0.46217483  | 4.021308635  | 2.818468595 | 0.093185271 | 0.999071534 | Tmem219       | Tmem219    | TMEM219    | 20.28202969 | 18.32062372 | 16.69541464 | 21.85536356 | 19.55536592 | 17.75396741 | 18.63800452 | 11.19135729 | 8.17114013  | 10.98030604 |
| ENSMUSG00000061759 | 0.417764429  | 4.697485435  | 2.817703733 | 0.093229691 | 0.999071534 | 1700052N19Rik | Armt1      | ARMT1      | 31.86173523 | 22.94524719 | 19.99410544 | 16.9986161  | 23.54492217 | 31.14220513 | 35.26983495 | 19.68849893 | 25.29910694 | 31.1108671  |
| ENSMUSG00000025875 | -0.392415752 | 5.082092484  | 2.817380307 | 0.093248481 | 0.999071534 | Tspan17       | Tspan17    | TSPAN17    | 44.3537812  | 36.5819574  | 30.89998114 | 48.08179984 | 38.3259011  | 35.65345915 | 24.20351976 | 25.35326003 | 19.32788915 | 38.23499424 |
| ENSMUSG00000043391 | -0.418349643 | 4.653821212  | 2.816903701 | 0.093276178 | 0.999071534 | 2510009E07Rik | C3orf70    |            | 28.49309362 | 27.86632087 | 28.54377342 | 31.91576901 | 31.72024237 | 37.98184831 | 18.8321504  | 18.09960253 | 11.86386692 | 20.84950968 |
| ENSMUSG00000042284 | -1.082537605 | 1.688593008  | 2.812136223 | 0.093553722 | 0.999071534 | Itga1         | Itga1      | ITGA1      | 7.71980369  | 7.648415729 | 1.211763966 | 2.705902155 | 2.616102464 | 4.511254014 | 2.394465859 | 1.588896405 | 1.335667137 | 0.196076894 |
| ENSMUSG00000026634 | 0.385953141  | 5.599586143  | 2.806176952 | 0.093901911 | 0.999071534 | Angel2        | Angel2     | ANGEL2     | 36.28307734 | 30.83082309 | 46.9895138  | 52.59163676 | 50.03295962 | 54.93543195 | 42.97095487 | 59.68723887 | 48.4768602  | 56.40478637 |
| ENSMUSG00000030187 | -0.729453558 | 3.273943451  | 2.802726053 | 0.094104185 | 0.999071534 | Klra2         | Klra2      |            | 18.45734882 | 16.30476221 | 9.492151068 | 6.660682229 | 11.38004572 | 12.6606161  | 10.9368846  | 5.733843549 | 1.414235792 | 5.882306805 |
| ENSMUSG00000032621 | 0.512816336  | 5.581323317  | 2.802624345 | 0.094110153 | 0.999071534 | Srek1         | Srek1      | SREK1      | 29.96687432 | 33.14313482 | 61.53068139 | 36.07869541 | 43.36189834 | 44.31215637 | 25.69197151 | 61.9669598  | 69.61182842 | 59.99952942 |
| ENSMUSG00000047731 | -0.36438601  | 5.935014013  | 2.801251209 | 0.094190777 | 0.999071534 | Wbp1l         | Wbp1l      | WBP1L      | 88.4970223  | 88.99435665 | 63.01172624 | 53.14669362 | 64.68313342 | 66.9411886  | 50.67207479 | 56.37128115 | 33.31310976 | 54.5093764  |
| ENSMUSG00000002728 | 0.424982158  | 5.944151515  | 2.8004969   | 0.094235098 | 0.999071534 | Naa20         | Naa20      | NAA20      | 64.77617096 | 41.26587091 | 55.87578288 | 54.46495364 | 55.91919016 | 55.2264806  | 112.7987565 | 58.44375473 | 52.71956757 | 58.82306805 |
| ENSMUSG00000005628 | 1.06964459   | 1.997628179  | 2.799652627 | 0.094284732 | 0.999071534 | Tmod4         | Tmod4      | TMOD4      | 4.56170218  | 1.600831199 | 1.615685288 | 1.595788451 | 3.793348573 | 1.309718907 | 1.035444696 | 5.802926001 | 10.68533709 | 4.24832693  |
| ENSMUSG00000056162 | 2.339834088  | -0.662789002 | 2.795228656 | 0.094545279 | 0.999071534 | Cndp1         | Cndp1      | CNDP1      | 0.070180034 | 0           | 0.06732022  | 0.693821065 | 0           | 0.072762162 | 0.129430587 | 0           | 1.492804447 | 2.222204793 |
| ENSMUSG00000023484 | -1.342092743 | -0.002658075 | 2.794668039 | 0.094578352 | 0.999071534 | Prph          | Prph       | PRPH       | 0.771980369 | 1.363671021 | 2.086926831 | 1.526406344 | 0.588623054 | 0.873145938 | 0.970729402 | 0.345412262 | 0           | 0.261435858 |
| ENSMUSG00000093164 | 0.922574479  | 3.510704851  | 2.791931517 | 0.094739971 | 0.999071534 | Gm22993       | Gm22993    |            | 9.895384729 | 2.371601776 | 15.14704958 | 7.285121188 | 5.690022859 | 6.330308052 | 2.912188207 | 16.37254122 | 25.92765618 | 14.44433116 |
| ENSMUSG00000081608 | 1.31634804   | -0.144188193 | 2.791295632 | 0.094777569 | 0.999071534 | Gm16210       | Gm16210    |            | 0.491260235 | 0.177870133 | 0.740522424 | 0.20814632  | 0.719428178 | 0.363810808 | 1.747312924 | 0.690824524 | 1.571373102 | 0.784307574 |
| ENSMUSG00000070691 | -0.54974539  | 4.596120355  | 2.788086144 | 0.094967587 | 0.999071534 | Runx3         | Runx3      | RUNX3      | 23.58049127 | 28.69638149 | 40.32481198 | 30.38936267 | 24.85297341 | 20.73721603 | 6.859821109 | 18.30684988 | 17.44224143 | 30.39191849 |
| ENSMUSG00000066180 | 1.51568123   | 0.565064394  | 2.787923489 | 0.094977228 | 0.999071534 | Gm10155       | Gm10155    |            | 0.491260235 | 1.245090933 | 1.88496617  | 0           | 0           | 1.018670261 | 1.617882337 | 2.141556024 | 0.864255206 | 3.986896835 |
| ENSMUSG00000079442 | -0.398696587 | 4.713997017  | 2.786983066 | 0.095032991 | 0.999071534 | St6galnac4    | St6galnac4 | ST6GALNAC4 | 37.82703808 | 33.73603527 | 22.28299293 | 27.47531419 | 33.35530641 | 33.32506998 | 21.74433861 | 20.93198308 | 13.67094599 | 21.89525311 |
| ENSMUSG00000034265 | -1.081878279 | 1.80831334   | 2.786693861 | 0.095050146 | 0.999071534 | Zdhhc14       | Zdhhc14    | ZDHHC14    | 8.140883891 | 6.640484974 | 4.308494102 | 2.775284262 | 1.962076848 | 4.365729691 | 3.041618794 | 2.901463001 | 0.078568655 | 0.71894861  |
| ENSMUSG00000082127 | 0.504920362  | 5.727708207  | 2.786197868 | 0.095079576 | 0.999071534 | Gm13577       | Gm13577    |            | 42.52910033 | 33.08384478 | 62.2038836  | 50.64893778 | 37.34486267 | 49.47826984 | 45.94785837 | 35.50838053 | 88.70401161 | 67.71188723 |
| ENSMUSG00000027333 | -0.533860553 | 5.673989557  | 2.786174649 | 0.095080954 | 0.999071534 | Smox          | Smox       | SMOX       | 46.95044244 | 126.5249548 | 47.05683402 | 43.22505238 | 50.22916731 | 42.85691314 | 25.8214021  | 63.00319658 | 25.22053829 | 44.83624965 |
| ENSMUSG00000085787 | 0.498372717  | 5.831119757  | 2.785418397 | 0.095125847 | 0.999071534 | Gm13092       | Gm13092    |            | 25.19463204 | 31.30514345 | 75.66792766 | 47.73488931 | 63.96370524 | 51.4428482  | 62.19139703 | 66.25007185 | 72.51886866 | 60.26096527 |
| ENSMUSG00000022901 | -0.692968378 | 3.451307226  | 2.785240935 | 0.095136385 | 0.999071534 | Cd86          | Cd86       | CD86       | 20.35220973 | 21.40370603 | 8.415027543 | 10.47669809 | 8.960150939 | 13.16995124 | 12.36062105 | 8.911636359 | 3.221314859 | 3.790819941 |
| ENSMUSG00000094622 | 1.774295084  | -0.830194418 | 2.784311652 | 0.095191587 | 0.999071534 | Gm3055        | Gm3055     | ZNF781     | 0.421080201 | 0.474320355 | 0           | 0           | 0.130805123 | 0.509335131 | 1.035444696 | 0.345412262 | 1.099961171 | 0.196076894 |
| ENSMUSG00000015468 | -0.388488109 | 5.313157389  | 2.782921661 | 0.095274222 | 0.999071534 | Notch4        | Notch4     | NOTCH4     | 47.58206274 | 58.04495347 | 51.43264834 | 40.51915022 | 35.77520119 | 52.02494549 | 27.18042326 | 24.86968286 | 25.45624425 | 39.80360938 |
| ENSMUSG00000081855 | 0.532995025  | 8.49356192   | 2.781544296 | 0.095356183 | 0.999071534 | Rpl17-ps5     | Rpl17-ps5  |            | 252.1568605 | 276.350897  | 305.229879  | 351.004077  | 339.243087  | 198.3496523 | 566.3235332 | 535.8035008 | 326.3741933 | 383.5917627 |
| ENSMUSG00000026761 | 0.377196806  | 5.75615856   | 2.780251133 | 0.095433203 | 0.999071534 | Orc4          | Orc4       | ORC4       | 53.75790569 | 45.65333419 | 52.91369319 | 43.01690606 | 48.46329814 | 50.56970226 | 81.15297802 | 49.32487101 | 58.06223612 | 50.65319749 |
| ENSMUSG00000020432 | -0.455884629 | 4.860996305  | 2.780172961 | 0.095437861 | 0.999071534 | Tcn2          | Tcn2       | TCN2       | 36.07253724 | 49.38860699 | 26.38952637 | 23.38176991 | 39.56854977 | 29.6869619  | 29.38074324 | 30.87985622 | 12.2567102  | 17.84299731 |
| ENSMUSG00000051730 | 0.55673943   | 3.481401055  | 2.779874481 | 0.095455649 | 0.999071534 | Mettl5        | Mettl5     | METTL5     | 12.21132584 | 7.114805329 | 10.29999371 | 8.325852786 | 8.502333007 | 10.91432423 | 13.0748928  | 10.50053276 | 8.406846095 | 20.58807382 |

|                     |              |              |             |             |             |               |               |            |             |             |             |             |             |             |             |             |             |             |
|---------------------|--------------|--------------|-------------|-------------|-------------|---------------|---------------|------------|-------------|-------------|-------------|-------------|-------------|-------------|-------------|-------------|-------------|-------------|
| ENSMUSG00000068011  | 1.379328971  | 0.011649536  | 2.77965069  | 0.095468989 | 0.999071534 | 2510049J12Rik | Mkrm2os       | MKRN2OS    | 0.070180034 | 0.355740266 | 0.673202203 | 0.416292639 | 1.046440986 | 0.9459081   | 0.19414588  | 1.174401691 | 2.121353688 | 1.503256184 |
| ENSMUSG000000024357 | -0.481206971 | 4.403690149  | 2.778730987 | 0.095523829 | 0.999071534 | Sil1          | Sil1          | SIL1       | 29.47561409 | 28.51851136 | 22.28299293 | 22.47980252 | 24.78757084 | 21.53759981 | 24.7859574  | 16.78703593 | 5.892649132 | 18.30051006 |
| ENSMUSG00000032232  | -0.516892945 | 4.942519867  | 2.773989124 | 0.095807127 | 0.999071534 | Cgnl1         | Cgnl1         | CGNL1      | 30.45813456 | 74.05326546 | 28.4764532  | 28.93233843 | 25.63780415 | 42.85691314 | 24.46238094 | 25.9750021  | 13.74951464 | 19.08481764 |
| ENSMUSG000000047213 | 0.385537398  | 6.656730663  | 2.773854903 | 0.095815159 | 0.999071534 | Ythdf3        | Ythdf3        | YTHDF3     | 76.77695669 | 85.67411417 | 108.5201952 | 78.54054461 | 104.578696  | 103.3950315 | 103.415039  | 118.8218181 | 116.0459036 | 99.60706191 |
| ENSMUSG00000040428  | 1.749484802  | -0.574612283 | 2.773532928 | 0.09583443  | 0.999071534 | Plekha4       | Plekha4       | PLEKHA4    | 0.561440268 | 0.237160178 | 0           | 0           | 0.523220493 | 0.363810808 | 0.711868228 | 0.138164905 | 1.335667137 | 1.372538255 |
| ENSMUSG00000036733  | -0.356433947 | 6.188642307  | 2.773169913 | 0.095856162 | 0.999071534 | Rbm42         | Rbm42         | RBM42      | 90.32170317 | 71.50379355 | 89.13197173 | 77.01413827 | 97.12280397 | 98.73825319 | 56.04344415 | 58.92733189 | 43.29132896 | 59.08450391 |
| ENSMUSG00000030707  | -0.425382714 | 6.750734719  | 2.771955208 | 0.095928921 | 0.999071534 | Coro1a        | Coro1a        | CORO1A     | 159.3086761 | 98.77721398 | 144.9404344 | 103.9343956 | 135.0562897 | 164.5880094 | 63.16212644 | 73.15831709 | 60.34072712 | 98.23452365 |
| ENSMUSG00000064344  | 1.563673159  | -0.23499646  | 2.771944429 | 0.095929567 | 0.999071534 | mt-Tm         | mt-Tm         |            | 0.421080201 | 0           | 0.807842644 | 0.485674746 | 0.196207685 | 0.654859454 | 0.129430587 | 0.967154334 | 1.964216377 | 1.30717929  |
| ENSMUSG00000029334  | 0.459653101  | 6.784722555  | 2.770893832 | 0.095992545 | 0.999071534 | Prkg2         | Prkg2         | PRKG2      | 75.30317599 | 84.36973319 | 135.5829238 | 99.49394079 | 84.89252495 | 84.04029656 | 111.8927424 | 140.030131  | 141.2664419 | 118.2997258 |
| ENSMUSG00000055725  | 1.359975396  | 0.312147611  | 2.769433533 | 0.096080157 | 0.999071534 | Paqr3         | Paqr3         | PAQR3      | 1.052700503 | 0.415030311 | 1.077123525 | 0           | 0.784830739 | 0.654859454 | 1.48845175  | 1.4507315   | 3.064177549 | 0.653589645 |
| ENSMUSG00000034957  | -0.582752674 | 3.953144556  | 2.769328694 | 0.096086451 | 0.999071534 | Cebpa         | Cebpa         | CEBPA      | 29.40543405 | 26.20619963 | 14.20456649 | 10.68484441 | 15.89282247 | 25.68504302 | 12.10175988 | 9.740625788 | 6.835472994 | 8.104511599 |
| ENSMUSG000000024177 | 0.494518578  | 3.852083668  | 2.768470771 | 0.096137967 | 0.999071534 | Nme4          | Nme4          | NME4       | 12.63240604 | 10.37575777 | 11.98299922 | 12.14186865 | 14.58477124 | 15.64386473 | 24.7859574  | 10.63869767 | 12.57098482 | 17.25476663 |
| ENSMUSG00000027996  | 1.050136245  | 2.454913644  | 2.767797373 | 0.096178424 | 0.999071534 | Sfrp2         | Sfrp2         | SFRP2      | 3.579181711 | 6.521904885 | 3.096730136 | 0.346910533 | 4.774386997 | 10.04117829 | 17.92613629 | 4.144947144 | 1.807079067 | 2.483640651 |
| ENSMUSG00000031029  | -0.41397123  | 7.776114694  | 2.764845286 | 0.096356002 | 0.999071534 | Elf3f         | Elf3f         | AL356585.1 | 271.3861897 | 254.7100308 | 252.7874274 | 308.7503741 | 206.0834716 | 238.3688411 | 165.4770054 | 168.9065961 | 150.1446999 | 191.7632019 |
| ENSMUSG00000004263  | -0.435954831 | 5.656191756  | 2.764368688 | 0.096384705 | 0.999071534 | Atn1          | Atn1          | ATN1       | 38.59901845 | 70.37728271 | 64.49277109 | 52.17534412 | 75.01673815 | 57.99144273 | 25.49782563 | 56.50944606 | 24.82769501 | 45.62055722 |
| ENSMUSG000000026377 | 0.372286306  | 5.731160486  | 2.762997143 | 0.096467356 | 0.999071534 | Mki67ip       | Nifk          | NIFK       | 55.72294663 | 43.22244237 | 49.48036195 | 47.45736088 | 43.81971627 | 84.04029656 | 69.18064873 | 35.30113317 | 50.75535119 | 53.398274   |
| ENSMUSG00000002033  | -0.797392522 | 1.486390334  | 2.762948405 | 0.096470295 | 0.999071534 | Cd3g          | Cd3g          | CD3G       | 3.859901845 | 3.49811262  | 4.173853661 | 3.330341114 | 2.681505025 | 3.565345915 | 1.48845175  | 0.898071881 | 1.728510412 | 1.960768935 |
| ENSMUSG000000073037 | 1.526337199  | -0.558558494 | 2.762046249 | 0.096524704 | 0.999071534 | Gpr179        | Gpr179        | GPR179     | 0.210540101 | 0.474320355 | 0.336601102 | 0           | 0.457817931 | 0.291048646 | 0.258861174 | 1.381649048 | 0.864255206 | 1.045743432 |
| ENSMUSG00000078599  | 1.117709952  | 0.84521631   | 2.75863093  | 0.096730985 | 0.999071534 | Skint8        | Skint8        |            | 0.631620302 | 1.422961066 | 1.615685288 | 1.248877918 | 0.523220493 | 0.436572969 | 1.164875283 | 1.796143762 | 2.985608894 | 4.117614764 |
| ENSMUSG00000063200  | 0.368001451  | 6.030726554  | 2.754643282 | 0.096972443 | 0.999071534 | Nol7          | Nol7          | NOL7       | 51.79286475 | 47.55061561 | 65.56989461 | 64.73350541 | 65.33715903 | 71.45244261 | 81.21769332 | 61.41430018 | 70.63322093 | 66.53542587 |
| ENSMUSG00000079017  | -0.588203499 | 4.320110848  | 2.753715414 | 0.097028721 | 0.999071534 | Ifi272a       | Ifi272a       |            | 35.01983674 | 15.83044186 | 25.17776241 | 26.01828996 | 21.58284533 | 24.0115133  | 28.99245148 | 6.908245239 | 7.85686551  | 11.63389568 |
| ENSMUSG00000082368  | 0.970277929  | 2.961126421  | 2.752015758 | 0.097131902 | 0.999071534 | Gm11225       | Gm11225       |            | 2.807201342 | 2.01586151  | 8.684308424 | 9.158438064 | 3.858751134 | 4.584016176 | 3.494625848 | 4.835771668 | 21.5278115  | 10.39207536 |
| ENSMUSG00000071637  | -0.445274868 | 6.133430992  | 2.751157042 | 0.097184078 | 0.999071534 | Cebpd         | Cebpd         | CEBPD      | 122.4641585 | 91.1880883  | 73.24439973 | 74.58576454 | 58.73150031 | 47.51369147 | 51.96638066 | 87.32021983 | 36.61299328 | 81.82958042 |
| ENSMUSG00000045411  | 0.363308136  | 5.313496915  | 2.746698426 | 0.097455476 | 0.999071534 | 2410002F23Rik | 2410002F23Rik |            | 36.63397751 | 29.88218238 | 43.28690168 | 34.9685817  | 35.05577302 | 60.39259406 | 39.60575961 | 32.53783508 | 41.79852451 | 42.28725003 |
| ENSMUSG00000063021  | 0.87305922   | 2.157538789  | 2.745942257 | 0.097501586 | 0.999071534 | Hist1h2ak     | Hist1h2ak     | HIST1H2AB  | 4.56170218  | 0.830060622 | 4.577774983 | 1.179495811 | 4.90519212  | 8.440410737 | 8.607134033 | 3.246875263 | 3.771295445 | 3.725460977 |
| ENSMUSG00000045104  | -0.717435684 | 2.146063963  | 2.745151483 | 0.097549832 | 0.999071534 | Gm5514        | Gm5514        |            | 8.140883891 | 3.972432975 | 6.126140051 | 3.607869541 | 6.017035667 | 4.220205368 | 4.46535525  | 2.556050739 | 2.828471584 | 1.699333077 |
| ENSMUSG00000054115  | 0.527297032  | 4.265446528  | 2.742655441 | 0.097702289 | 0.999071534 | Skp2          | Skp2          | SKP2       | 17.12392818 | 12.56948941 | 22.75423448 | 7.493267507 | 21.9752607  | 29.25038893 | 31.7752091  | 15.61263424 | 17.91365336 | 15.68615148 |
| ENSMUSG00000025898  | 0.567567416  | 4.824250586  | 2.742229475 | 0.097728332 | 0.999071534 | Cwf19l2       | Cwf19l2       | CWF19L2    | 22.03653053 | 15.47470159 | 30.02481827 | 28.93233843 | 20.79801459 | 22.1196971  | 17.27898336 | 26.94215643 | 50.99105716 | 36.86245598 |
| ENSMUSG00000020064  | 0.364826797  | 6.095697093  | 2.741088602 | 0.097798123 | 0.999071534 | Herc4         | Herc4         | HERC4      | 63.93401056 | 66.81988005 | 51.2980079  | 54.95062839 | 73.5778818  | 65.12213456 | 90.60141087 | 78.40858347 | 64.7405718  | 68.30011791 |
| ENSMUSG00000064349  | 0.895709977  | 3.707837541  | 2.73985235  | 0.09787381  | 0.999071534 | mt-Tc         | mt-Tc         |            | 9.825204696 | 3.320242487 | 14.00260583 | 12.6969255  | 6.801866406 | 9.750129644 | 7.636404631 | 10.36236786 | 39.99144544 | 5.751588876 |
| ENSMUSG00000003484  | -0.859416717 | 2.399079738  | 2.739718246 | 0.097882024 | 0.999071534 | Cyp4f18       | Cyp4f18       | CYP4F3     | 12.1411458  | 11.44297857 | 2.962086965 | 2.914048475 | 5.297607489 | 4.729540499 | 7.118682283 | 2.072473572 | 2.121353688 | 1.960768935 |
| ENSMUSG000000026659 | 0.445419249  | 4.738305087  | 2.73918701  | 0.09791457  | 0.999071534 | Dusp12        | Dusp12        | DUSP12     | 24.21211157 | 19.15068434 | 27.39932968 | 26.5039647  | 19.03214542 | 26.63095112 | 41.35307253 | 19.34308667 | 30.48463818 | 27.97363681 |
| ENSMUSG00000042742  | 0.521603863  | 5.890602676  | 2.738919371 | 0.097930971 | 0.999071534 | B630005N14Rik | B630005N14Rik | BMT2       | 28.98435385 | 50.39653775 | 66.8489788  | 54.60371785 | 50.42537499 | 41.76548071 | 51.77223478 | 59.68723887 | 103.2392128 | 62.67924696 |
| ENSMUSG00000097013  | 1.50838967   | 0.298727174  | 2.734157564 | 0.098223285 | 0.999071534 | Gm26710       | Gm26710       |            | 0.140360067 | 0.592900444 | 0.403921322 | 1.665170557 | 0.130805123 | 0.145524323 | 0.647152935 | 0.759906976 | 3.142746204 | 2.679717545 |
| ENSMUSG00000028217  | -0.807996071 | 1.936952658  | 2.732406276 | 0.098331031 | 0.999071534 | Cdh17         | Cdh17         | CDH17      | 4.702062247 | 8.004155995 | 4.173853661 | 3.81601586  | 3.727946011 | 1.8918162   | 2.78275762  | 5.18118393  | 1.257098482 | 1.764692042 |
| ENSMUSG00000058183  | 1.277821519  | 0.370291     | 2.729712243 | 0.09849703  | 0.999071534 | Mmel1         | Mmel1         | MMEL1      | 0.842160403 | 1.304380977 | 0.336601102 | 0.346910533 | 0.784830739 | 1.018670261 | 0.647152935 | 0.483577167 | 4.16413872  | 1.111102397 |
| ENSMUSG00000075266  | 0.545132255  | 4.535958367  | 2.728981888 | 0.098542085 | 0.999071534 | Cenpw         | Cenpw         | CENPW      | 18.38716879 | 10.67220799 | 27.66861056 | 19.42698983 | 21.05962483 | 20.95550252 | 28.60415972 | 14.02373784 | 35.04162017 | 29.2808161  |
| ENSMUSG00000074867  | 0.790047515  | 1.978698667  | 2.727870906 | 0.098610664 | 0.999071534 | Zfp808        | Zfp808        |            | 3.228281543 | 2.01586151  | 1.683005509 | 4.093544286 | 3.400933203 | 5.457162114 | 7.830550511 | 3.315957715 | 1.649941757 | 5.686229912 |
| ENSMUSG00000030291  | 0.457332695  | 6.24651632   | 2.727382226 | 0.098640846 | 0.999071534 | Med21         | Med21         | MED21      | 63.30239025 | 46.36481473 | 77.82217472 | 78.88745515 | 63.70209499 | 53.55295088 | 122.8943423 | 69.98052428 | 86.58265792 | 79.80329566 |

|                      |              |              |             |             |             |               |               |          |             |             |             |             |             |             |             |             |             |             |
|----------------------|--------------|--------------|-------------|-------------|-------------|---------------|---------------|----------|-------------|-------------|-------------|-------------|-------------|-------------|-------------|-------------|-------------|-------------|
| ENSMUSG00000029769   | -0.91655798  | 2.083682058  | 2.726562017 | 0.098691527 | 0.999071534 | Ccdc136       | Ccdc136       | CCDC136  | 2.737021308 | 7.707705773 | 8.213066882 | 6.105625376 | 2.87771271  | 3.201535107 | 0.517722348 | 3.039627905 | 4.399844685 | 2.091486864 |
| ENSMUSG00000020053   | 0.726873635  | 2.715621884  | 2.726301594 | 0.098707624 | 0.999071534 | Igf1          | Igf1          | IGF1     | 5.614402683 | 4.091013064 | 9.088229746 | 3.330341114 | 3.073920395 | 14.26138366 | 11.84289871 | 4.90485412  | 3.69272679  | 5.882306805 |
| ENSMUSG00000041538   | -1.566684601 | 0.092006842  | 2.720978442 | 0.099037289 | 0.999071534 | H2-Ob         | H2-Ob         | HLA-DOB  | 2.17558104  | 1.245090933 | 2.01960661  | 0           | 1.831271725 | 0.800383777 | 0.129430587 | 0.621742072 | 0           | 0.784307574 |
| ENSMUSG000000096140  | 1.43460809   | -0.483353397 | 2.719109876 | 0.099153295 | 0.999071534 | Ankrd66       | Ankrd66       | ANKRD66  | 0.210540101 | 0.355740266 | 0.471241542 | 0.346910533 | 0.261610246 | 0.654859454 | 1.48845175  | 0.207247357 | 1.492804447 | 0.196076894 |
| ENSMUSG00000002608   | -0.388295019 | 4.659799695  | 2.706274235 | 0.09995419  | 0.999071534 | Ccdc97        | Ccdc97        | CCDC97   | 32.0020953  | 32.78739456 | 29.08233519 | 21.09216039 | 33.74772178 | 31.06944297 | 16.37296925 | 20.51748836 | 16.57798623 | 22.2874069  |
| ENSMUSG00000071856   | 0.948711403  | 3.400132091  | 2.705649933 | 0.099993324 | 0.999071534 | Mcc           | Mcc           | MCC      | 5.895122818 | 2.075151554 | 11.915679   | 12.21125075 | 4.381971627 | 6.69411886  | 4.46535525  | 5.664761096 | 28.83469642 | 15.16327977 |
| ENSMUSG000000029703  | 0.402372368  | 4.894099302  | 2.704497563 | 0.100065603 | 0.999071534 | Lrwd1         | Lrwd1         | LRWD1    | 28.28255352 | 20.09932505 | 29.35161607 | 21.43907092 | 33.61691666 | 33.76164295 | 24.91538799 | 32.81416489 | 35.59160076 | 33.136995   |
| ENSMUSG000000026333  | 0.648367265  | 2.791641608  | 2.702945902 | 0.100163017 | 0.999071534 | Gin1          | Gin1          | GIN1     | 5.824942784 | 4.446753331 | 3.702612119 | 6.591300122 | 6.867268968 | 6.69411886  | 8.801279913 | 5.319348834 | 5.566943167 | 13.52930565 |
| ENSMUSG000000045160  | 0.473335559  | 4.325352449  | 2.702783496 | 0.100173219 | 0.999071534 | Bola3         | Bola3         | BOLA3    | 15.22906728 | 13.39955004 | 21.40783007 | 21.02277828 | 15.04258917 | 17.68120525 | 34.36382084 | 18.37593234 | 19.09218319 | 21.11094554 |
| ENSMUSG000000061577  | -0.681211719 | 2.46240801   | 2.701065679 | 0.100281196 | 0.999071534 | Gpr114        | Adgrg5        | ADGRG5   | 8.772504193 | 8.063446039 | 6.260780492 | 4.648601139 | 6.801866406 | 7.203453991 | 1.812028217 | 3.039627905 | 3.457020824 | 4.901922338 |
| ENSMUSG000000086682  | 1.422329968  | -0.3560525   | 2.699619888 | 0.100372174 | 0.999071534 | Gm16023       | Gm16023       |          | 0.280720134 | 0           | 0.336601102 | 0.555056852 | 0.654025616 | 0.800383777 | 0.323576467 | 1.381649048 | 0.707117896 | 1.372538255 |
| ENSMUSG000000076490  | -0.756851932 | 2.643151812  | 2.694723213 | 0.100680972 | 0.999071534 | Trbc1         | Trbc1         | TRBC1    | 18.38716879 | 8.419186306 | 4.712415424 | 4.648601139 | 4.054958819 | 5.311637791 | 2.9769035   | 5.733843549 | 3.142746204 | 4.901922338 |
| ENSMUSG000000027365  | 0.397437176  | 6.007616971  | 2.693975772 | 0.100728199 | 0.999071534 | Trpm7         | Trpm7         | TRPM7    | 40.77459949 | 75.71338671 | 50.2882046  | 49.33067776 | 72.26983056 | 74.36292908 | 68.79235697 | 97.75167014 | 50.99105716 | 60.91455492 |
| ENSMUSG000000058281  | 1.571949158  | 1.370680863  | 2.693802183 | 0.10073917  | 0.999071534 | Gm10038       | Gm10038       |          | 0.842160403 | 0.355740266 | 4.241173882 | 1.040731598 | 0           | 0.582097292 | 0.388291761 | 1.72706131  | 9.742513232 | 3.464025119 |
| ENSMUSG000000042719  | 0.356468442  | 5.35306068   | 2.692603016 | 0.100814999 | 0.999071534 | Naa25         | Naa25         | NAA25    | 34.87947667 | 43.93392291 | 35.14115502 | 33.23402904 | 38.52210878 | 62.72098323 | 46.91858777 | 34.61030865 | 42.74134837 | 35.42455876 |
| ENSMUSG000000027411  | 0.35941908   | 5.881121617  | 2.691737783 | 0.10086975  | 0.999071534 | Vps16         | Vps16         | VPS16    | 52.28412499 | 56.2069621  | 59.03983324 | 47.73488931 | 52.32204928 | 57.55486976 | 49.44248422 | 71.98391539 | 63.48347332 | 71.30663027 |
| ENSMUSG000000002688  | -0.413464044 | 4.515140184  | 2.690444091 | 0.100951675 | 0.999071534 | Prkd1         | Prkd1         | PRKD1    | 26.52805268 | 33.55816513 | 18.91698192 | 24.07559097 | 32.11265774 | 25.9033295  | 21.61490802 | 14.43823255 | 13.59237733 | 20.19592003 |
| ENSMUSG0000000029363 | 0.548398605  | 5.165099094  | 2.69024501  | 0.100964288 | 0.999071534 | Rfc5          | Rfc5          | RFC5     | 46.10828204 | 20.81080559 | 26.7934477  | 25.87952574 | 31.72024237 | 64.46727511 | 73.25771222 | 16.02712896 | 29.93465759 | 27.12397027 |
| ENSMUSG000000097378  | 1.457947985  | 0.526322232  | 2.688387991 | 0.101082029 | 0.999071534 | B230208H11Rik | B230208H11Rik |          | 1.333420637 | 0           | 1.481044848 | 0           | 0.915635862 | 1.236956746 | 1.359021163 | 1.312566595 | 3.299883514 | 1.699333077 |
| ENSMUSG000000076435  | -0.520390174 | 4.172190273  | 2.68823846  | 0.101091517 | 0.999071534 | Acsf2         | Acsf2         | ACSF2    | 15.86068758 | 26.08761954 | 22.14835249 | 19.35760773 | 26.16102464 | 20.88274036 | 11.64875283 | 22.58996193 | 5.421237202 | 12.61428015 |
| ENSMUSG000000069895  | -0.427344037 | 4.751367217  | 2.687858128 | 0.101115652 | 0.999071534 | Atxn1l        | Atxn1l        | ATXN1L   | 30.24759446 | 35.92976691 | 31.1019418  | 26.29581838 | 36.49462937 | 42.05652936 | 17.99085159 | 25.00784777 | 12.49241616 | 17.38548456 |
| ENSMUSG000000039476  | -0.391310371 | 6.085330417  | 2.687202287 | 0.101157285 | 0.999071534 | Prrx2         | Prrx2         | PRRX2    | 77.8296572  | 84.7847635  | 67.99342255 | 87.69898268 | 80.24894308 | 58.50077786 | 50.99565126 | 70.25685408 | 29.77752028 | 76.6007064  |
| ENSMUSG000000031145  | 0.829312942  | 1.355503055  | 2.686713177 | 0.101188347 | 0.999071534 | Prickle3      | Prickle3      | PRICKLE3 | 2.737021308 | 1.956571465 | 1.346404407 | 0.971349492 | 2.158284533 | 3.638108076 | 1.747312924 | 3.661369977 | 3.355589479 | 2.287563758 |
| ENSMUSG000000060376  | -0.41974465  | 4.325492793  | 2.68535771  | 0.101274481 | 0.999071534 | Bckdha        | Bckdha        | BCKDHA   | 21.26455016 | 29.22999189 | 22.14835249 | 22.54918463 | 23.1525068  | 17.31739444 | 17.73199041 | 20.310241   | 9.192532646 | 18.49658695 |
| ENSMUSG000000028341  | -1.016885756 | 1.010342657  | 2.683701326 | 0.101379847 | 0.999071534 | Nr4a3         | Nr4a3         | NR4A3    | 2.877381375 | 5.336103997 | 2.356207712 | 1.457024238 | 1.046440986 | 1.45524323  | 0.776583522 | 1.312566595 | 1.885647722 | 0.392153787 |
| ENSMUSG000000048550  | 0.782190639  | 1.920756296  | 2.68354685  | 0.101389679 | 0.999071534 | Thns1         | Thns1         | THNSL1   | 3.298461576 | 4.268883197 | 1.683005509 | 1.179495811 | 3.662543449 | 5.093351307 | 6.536244641 | 2.486968286 | 4.242707375 | 3.986896835 |
| ENSMUSG000000044393  | 1.602460584  | -0.416355659 | 2.683538522 | 0.10139021  | 0.999071534 | Dsg2          | Dsg2          | DSG2     | 0.350900168 | 0.948640711 | 0.06732022  | 0           | 0.261610246 | 0.436572969 | 0.323576467 | 0.552659619 | 1.885647722 | 1.111102397 |
| ENSMUSG000000074671  | 1.011774082  | 0.625362781  | 2.682268118 | 0.101471113 | 0.999071534 | Tspy13        | Tspy13        |          | 1.122880537 | 1.185800888 | 0.740522424 | 0.416292639 | 1.438856355 | 3.783632399 | 0.970729402 | 0.967154334 | 2.199922343 | 1.437897219 |
| ENSMUSG000000078193  | 0.562035962  | 9.512844211  | 2.681332143 | 0.101530763 | 0.999071534 | Gm2000        | Gm2000        | RPL35    | 539.6142779 | 418.0541031 | 751.7649006 | 740.9315158 | 595.6211285 | 355.0793482 | 879.2866925 | 941.1793314 | 984.3866797 | 861.8886649 |
| ENSMUSG000000037679  | -0.395198227 | 6.866969294  | 2.676434631 | 0.101843513 | 0.999071534 | Inf2          | Inf2          | INF2     | 143.0269084 | 163.0476221 | 111.6169253 | 126.2754339 | 144.9320765 | 162.186858  | 70.41023931 | 82.00087099 | 70.31894631 | 114.6396237 |
| ENSMUSG000000032033  | -1.632713982 | -0.751017952 | 2.675402529 | 0.101909556 | 0.999071534 | Barx2         | Barx2         | BARX2    | 1.473780704 | 0.355740266 | 1.009803305 | 0.693821065 | 0.065402562 | 0.218286485 | 0.19414588  | 0.138164905 | 0           | 0.522871716 |
| ENSMUSG000000042178  | -0.528543597 | 4.075657996  | 2.673315024 | 0.102043277 | 0.999071534 | Armc5         | Armc5         | ARMC5    | 28.63345369 | 16.4233423  | 22.68691426 | 16.09664872 | 19.09754799 | 26.63095112 | 9.513148141 | 6.977327692 | 9.113963991 | 16.73189491 |
| ENSMUSG000000035764  | 0.379644331  | 4.822738729  | 2.669865764 | 0.102264649 | 0.999071534 | Fbxo45        | Fbxo45        | FBXO45   | 23.72085134 | 23.8938879  | 24.77384109 | 24.76941204 | 29.95437321 | 37.39975102 | 24.59181152 | 25.07693022 | 32.21314859 | 33.72522568 |
| ENSMUSG0000000025151 | -0.422491815 | 8.862186949  | 2.667851061 | 0.102394194 | 0.999071534 | Maged1        | Maged1        | MAGED1   | 492.7340155 | 611.0431977 | 570.404227  | 544.372008  | 545.718974  | 503.8052064 | 309.2096722 | 457.3258348 | 254.7195798 | 422.8725003 |
| ENSMUSG000000067365  | 0.435019749  | 5.342704157  | 2.666028441 | 0.102511544 | 0.999071534 | Tmem128       | Tmem128       | TMEM128  | 42.31856023 | 33.67674522 | 29.68821717 | 35.17672802 | 37.86808316 | 34.19821592 | 73.58128869 | 29.01463001 | 41.40568124 | 43.2676345  |
| ENSMUSG0000000035704 | 0.462471732  | 3.70376355   | 2.662939328 | 0.102710773 | 0.999071534 | Alg8          | Alg8          | ALG8     | 12.63240604 | 11.32439848 | 9.694111729 | 11.23990126 | 11.44544828 | 16.66253499 | 13.46078104 | 10.63869767 | 12.49241616 | 19.08481764 |
| ENSMUSG000000086564  | -0.944650691 | 0.974289838  | 2.662361099 | 0.102748112 | 0.999071534 | Cd101         | Cd101         | CD101    | 3.719541778 | 2.193731643 | 3.366011017 | 1.734552664 | 1.504258917 | 3.201535107 | 1.035444696 | 0.552659619 | 0.707117896 | 0.915025503 |
| ENSMUSG000000035597  | 0.450472365  | 5.696944785  | 2.661533286 | 0.102801594 | 0.999071534 | Prpf39        | Prpf39        | PRPF39   | 34.24785637 | 39.07213926 | 57.35682773 | 48.56747458 | 47.02444179 | 46.34949689 | 32.61650791 | 80.48105704 | 59.86931518 | 62.02565732 |
| ENSMUSG000000092286  | 1.058163695  | 0.875059193  | 2.660846952 | 0.102845959 | 0.999071534 | Gm20448       | Dtnbos        |          | 0.421080201 | 0.770770577 | 1.817645949 | 2.081463196 | 0.588623054 | 1.8918162   | 0.841298815 | 3.039627905 | 3.299883514 | 1.699333077 |

|                    |              |              |             |             |             |               |               |             |             |             |             |             |             |             |             |             |             |             |
|--------------------|--------------|--------------|-------------|-------------|-------------|---------------|---------------|-------------|-------------|-------------|-------------|-------------|-------------|-------------|-------------|-------------|-------------|-------------|
| ENSMUSG00000033192 | -0.421242366 | 6.389444012  | 2.659976312 | 0.102902267 | 0.999071534 | Lpcat2        | Lpcat2        | LPCAT2      | 82.95279965 | 122.4339417 | 83.34243278 | 109.6931105 | 97.97303727 | 58.50077786 | 54.49027711 | 98.16616485 | 43.60560358 | 89.80321723 |
| ENSMUSG00000037321 | -0.416987375 | 6.011237456  | 2.658909682 | 0.102971297 | 0.999071534 | Tap1          | Tap1          | TAP1        | 106.0420307 | 85.19979381 | 59.78035566 | 57.86467686 | 75.2783484  | 96.6281505  | 41.61193371 | 52.08816911 | 27.65616659 | 59.34593977 |
| ENSMUSG00000097451 | 1.033638357  | 2.504831009  | 2.658357309 | 0.103007065 | 0.999071534 | Rlan          | Rlan          |             | 5.684582717 | 2.727342043 | 4.510454763 | 2.914048475 | 3.073920395 | 9.968416129 | 22.13263037 | 0.967154334 | 1.414235792 | 3.267948225 |
| ENSMUSG00000055240 | 0.51438097   | 3.835110474  | 2.657253353 | 0.103078591 | 0.999071534 | Zfp101        | Zfp101        |             | 10.2462849  | 7.055515284 | 16.83005509 | 13.11321814 | 13.01510976 | 14.26138366 | 13.97850339 | 14.507315   | 16.49941757 | 17.73840728 |
| ENSMUSG00000007872 | -0.356543149 | 6.055248338  | 2.656438437 | 0.103131425 | 0.999071534 | Id3           | Id3           | ID3         | 72.91705485 | 68.71716147 | 103.9424202 | 72.78182977 | 67.9532615  | 69.41510209 | 58.43791001 | 56.23311625 | 51.69817505 | 45.42448033 |
| ENSMUSG00000060068 | 0.827027618  | 1.566603963  | 2.655439902 | 0.103196204 | 0.999071534 | Gm12222       | Gm12222       |             | 1.614140771 | 0.770770577 | 1.817645949 | 3.260959008 | 3.073920395 | 3.056010784 | 4.012348196 | 2.832380548 | 3.299883514 | 4.117614764 |
| ENSMUSG00000026435 | 1.594049982  | 0.035904629  | 2.653070146 | 0.103350118 | 0.999071534 | Slc45a3       | Slc45a3       | SLC45A3     | 1.473780704 | 0           | 0.403921322 | 0           | 0.457817931 | 1.528005392 | 3.17104938  | 0.690824524 | 0.549980586 | 0.71894861  |
| ENSMUSG00000048960 | 0.566198286  | 4.280461241  | 2.651983826 | 0.103420758 | 0.999071534 | Prex2         | Prex2         | PREX2       | 11.2989854  | 9.367827016 | 19.79214478 | 24.42250151 | 15.04258917 | 20.30064306 | 18.76743511 | 15.12905707 | 33.23454111 | 19.67304832 |
| ENSMUSG00000001158 | 0.411891268  | 6.131549584  | 2.651704675 | 0.103438919 | 0.999071534 | Snmp27        | Snmp27        | SNRNP27     | 62.95149009 | 49.38860699 | 73.37904017 | 62.99895275 | 62.59025145 | 54.13504817 | 76.4287616  | 68.59887523 | 93.41813091 | 80.39152634 |
| ENSMUSG00000032251 | 0.455600538  | 4.56418786   | 2.65050745  | 0.103516847 | 0.999071534 | Irak1bp1      | Irak1bp1      | IRAK1BP1    | 18.03626862 | 17.25340292 | 19.59018412 | 27.61407841 | 19.81697616 | 20.15511874 | 22.06791508 | 26.59674417 | 30.95605011 | 27.71220095 |
| ENSMUSG00000050796 | 0.538308494  | 4.036738788  | 2.647968408 | 0.103682326 | 0.999071534 | B3galt6       | B3galt6       | B3GALT6     | 17.47482835 | 7.292675462 | 17.36861685 | 12.41939707 | 14.45396611 | 16.22596202 | 20.12645627 | 13.81649048 | 25.53481291 | 14.37897219 |
| ENSMUSG00000017002 | -0.689285685 | 6.37646167   | 2.643016505 | 0.104005896 | 0.999071534 | Slpi          | Slpi          | SLPI        | 115.3057951 | 229.5710519 | 91.89210077 | 61.33378219 | 36.102214   | 50.93351307 | 65.62130759 | 109.9101818 | 18.69933991 | 64.77073382 |
| ENSMUSG00000024429 | -0.386381757 | 6.367857279  | 2.639655799 | 0.104226123 | 0.999071534 | Gnl1          | Gnl1          | GNL1        | 119.6569572 | 90.95092812 | 104.5483022 | 88.9478606  | 81.2299815  | 121.9493827 | 53.51954771 | 49.39395346 | 53.58382278 | 76.73142433 |
| ENSMUSG00000031917 | 0.425918862  | 6.089960288  | 2.639615377 | 0.104228775 | 0.999071534 | Nip7          | Nip7          | NIP7        | 76.49623656 | 47.84706584 | 56.81826597 | 60.77872534 | 59.32012337 | 78.65589661 | 121.4706059 | 43.79827482 | 68.04045531 | 63.72499039 |
| ENSMUSG00000014786 | 0.446732168  | 4.422065584  | 2.636745423 | 0.104417252 | 0.999071534 | Slc9a5        | Slc9a5        | SLC9A5      | 23.93139144 | 13.28096995 | 22.35031315 | 15.40282765 | 18.9013403  | 25.24847005 | 16.43768454 | 25.76775474 | 17.28510412 | 34.2480974  |
| ENSMUSG00000038740 | -0.412934117 | 4.530137598  | 2.635113937 | 0.104524563 | 0.999071534 | Mvb12b        | Mvb12b        | MVB12B      | 29.33525402 | 29.22999189 | 27.803251   | 23.65929833 | 26.42263488 | 32.37916188 | 13.65492692 | 21.00106553 | 11.94243557 | 19.08481764 |
| ENSMUSG00000001123 | -0.358816983 | 5.697986745  | 2.631631894 | 0.104753997 | 0.999071534 | Lgalb9        | Lgalb9        | LGAL59C     | 57.5476275  | 70.79231302 | 60.31891743 | 49.7469704  | 64.48692573 | 69.48786425 | 48.08346306 | 42.62387313 | 22.78490998 | 43.46371114 |
| ENSMUSG00000032883 | 0.437426005  | 5.340025762  | 2.630481599 | 0.104829912 | 0.999071534 | Acsl3         | Acsl3         | ACSL3       | 27.30003305 | 42.03664148 | 26.18756571 | 37.18880911 | 45.32397519 | 35.14412402 | 40.77063489 | 71.36217332 | 32.29171725 | 42.352609   |
| ENSMUSG00000032698 | -0.533257231 | 3.689532457  | 2.629328365 | 0.104906081 | 0.999071534 | Lmo2          | Lmo2          | LMO2        | 16.07122768 | 20.98867572 | 13.93528561 | 12.00310443 | 15.69661478 | 17.46291877 | 12.23119047 | 11.4676871  | 3.928432755 | 7.450921954 |
| ENSMUSG00000020527 | 0.526558575  | 3.253076923  | 2.628579333 | 0.104955586 | 0.999071534 | Myo19         | Myo19         | MYO19       | 8.211063924 | 6.284744707 | 8.953589305 | 7.076974868 | 9.548773993 | 17.60844309 | 8.283557565 | 8.635306549 | 9.113963991 | 11.045665   |
| ENSMUSG00000019773 | 0.448399893  | 5.188180666  | 2.628250663 | 0.104977317 | 0.999071534 | Fbxo5         | Fbxo5         | FBXO5       | 37.82703808 | 18.08346354 | 32.58298665 | 32.33206165 | 38.78371903 | 61.41126432 | 58.63205589 | 23.28078646 | 29.77752028 | 34.18273844 |
| ENSMUSG00000023009 | -0.506753489 | 3.76971073   | 2.627090258 | 0.105054078 | 0.999071534 | Nckap5l       | Nckap5l       | NCKAP5L     | 16.91338808 | 20.51435536 | 17.77253817 | 12.97445392 | 14.32316099 | 21.46483765 | 8.283557565 | 10.29328541 | 5.578374512 | 10.78422914 |
| ENSMUSG00000044037 | 1.076228066  | 0.327987093  | 2.620346565 | 0.105501396 | 0.999071534 | Als2cl        | Als2cl        | ALS2CL      | 1.543960738 | 0.652190488 | 0.471241542 | 0.346910533 | 0.784830739 | 1.673529715 | 0.970729402 | 0.759906976 | 1.492804447 | 2.483640651 |
| ENSMUSG00000038914 | 0.398862953  | 5.008487485  | 2.619767587 | 0.105539898 | 0.999071534 | Dido1         | Dido1         | DIDO1       | 21.9663505  | 31.30514345 | 30.22677893 | 28.30789947 | 31.58943725 | 48.82341038 | 22.90921389 | 31.01802112 | 39.99144544 | 32.61412329 |
| ENSMUSG00000077563 | 1.051843266  | 1.166130792  | 2.619628948 | 0.10554912  | 0.999071534 | Snora68       | Snora68       | SNORA68     | 1.19306057  | 1.185800888 | 1.95228639  | 0.346910533 | 2.550699902 | 2.328389169 | 0.841298815 | 1.174401691 | 2.907040239 | 6.339819557 |
| ENSMUSG00000060708 | 0.409151916  | 4.44224122   | 2.616339458 | 0.105768182 | 0.999071534 | Bloc1s4       | Bloc1s4       | BLOC1S4     | 17.05374815 | 16.71979252 | 22.75423448 | 19.21884351 | 20.47100178 | 23.35665385 | 20.57946333 | 21.7609725  | 26.47763677 | 24.77104755 |
| ENSMUSG00000080718 | -1.640840119 | -0.676155402 | 2.615612723 | 0.105816645 | 0.999071534 | Gm8019        | Gm8019        |             | 2.105401006 | 0.474320355 | 0.06732022  | 0.20814632  | 1.046440986 | 0.363810808 | 0.388291761 | 0.27632981  | 0           | 0.130717929 |
| ENSMUSG00000023052 | 1.011339287  | 1.675471425  | 2.612809029 | 0.106003844 | 0.999071534 | Npff          | Npff          | NPFF        | 1.052700503 | 0.652190488 | 2.894769475 | 2.844666369 | 3.073920395 | 1.673529715 | 1.035444696 | 3.592287524 | 5.342668547 | 7.25484506  |
| ENSMUSG00000012405 | 0.544365539  | 9.459428129  | 2.612367965 | 0.106033326 | 0.999071534 | Rpl15         | Rpl15         | RPL15       | 532.7366346 | 425.3467786 | 749.8126142 | 664.5418165 | 588.8846646 | 363.8835698 | 799.2985898 | 868.2282617 | 1007.485864 | 806.529622  |
| ENSMUSG00000023885 | 0.818853448  | 4.822558071  | 2.612363028 | 0.106033656 | 0.999071534 | Thbs2         | Thbs2         | THBS2       | 30.52831459 | 26.02832949 | 20.46534698 | 7.84017804  | 22.10606582 | 60.17430758 | 90.40726499 | 9.257048621 | 8.485414751 | 15.81686941 |
| ENSMUSG00000023852 | 0.357358999  | 6.446780715  | 2.611859335 | 0.106067336 | 0.999071534 | Chd1          | Chd1          | CHD1        | 69.12733304 | 76.54344733 | 89.06465151 | 73.68379716 | 88.09725047 | 119.4754692 | 107.168526  | 75.43803801 | 94.51809208 | 75.42424504 |
| ENSMUSG00000029552 | 0.398217723  | 7.40046508   | 2.609848732 | 0.106201892 | 0.999071534 | Tes           | Tes           | TES         | 145.1323094 | 174.1348604 | 155.6443494 | 131.8953845 | 150.4258917 | 174.9202363 | 231.5513201 | 179.890706  | 174.265277  | 156.2732841 |
| ENSMUSG00000097042 | 0.774768369  | 2.964668443  | 2.609615338 | 0.106217524 | 0.999071534 | Gm17491       | Gm17491       |             | 4.631882214 | 5.217523908 | 9.155549966 | 4.926129565 | 5.493815174 | 3.34705943  | 4.400639957 | 8.773471454 | 16.34228026 | 10.65351121 |
| ENSMUSG00000049526 | -1.364151654 | -0.105599526 | 2.606499459 | 0.106426453 | 0.999071534 | Tmem202       | Tmem202       | TMEM202     | 0.491260235 | 1.185800888 | 0.942483085 | 2.497755836 | 0.719428178 | 0.436572969 | 0.388291761 | 0.621742072 | 0.628549241 | 0           |
| ENSMUSG00000071103 | 1.108032328  | 0.360818579  | 2.603102833 | 0.106654722 | 0.999071534 | 1700029J07Rik | 1700029J07Rik | C4orf47     | 0.631620302 | 0.296450222 | 0.942483085 | 0.346910533 | 1.63506404  | 0.873145938 | 0.970729402 | 2.072473572 | 1.964216377 | 1.503256184 |
| ENSMUSG00000017146 | 0.468498     | 4.49402441   | 2.602969546 | 0.10666369  | 0.999071534 | Brcal         | Brcal         | BRCA1       | 24.21211157 | 14.40748079 | 18.24377971 | 14.91715291 | 26.35723232 | 45.47635095 | 30.86919499 | 14.02373784 | 16.34228026 | 23.72530412 |
| ENSMUSG00000078942 | -1.044966455 | 1.078299457  | 2.601332511 | 0.106773908 | 0.999071534 | Naip6         | Naip6         | NAIP        | 2.807201342 | 2.727342043 | 2.356207712 | 3.954780073 | 1.831271725 | 3.056010784 | 0.906014109 | 1.105319238 | 0           | 1.633974113 |
| ENSMUSG00000085335 | 1.407567166  | 1.229753746  | 2.597912242 | 0.10700459  | 0.999071534 | Gm13684       | Gm13684       |             | 0.631620302 | 0.118580089 | 2.625488593 | 2.081463196 | 0.850233301 | 0.363810808 | 0.258861174 | 1.657978857 | 8.01400282  | 3.725460977 |
| ENSMUSG00000004100 | 0.474466015  | 5.246047048  | 2.596943243 | 0.107070044 | 0.999071534 | Ppan          | Ppan          | PPAN-P2RY11 | 30.59849462 | 16.30476221 | 43.21958146 | 37.95201228 | 35.57899351 | 47.00435634 | 30.15732676 | 28.39288793 | 49.26254675 | 54.5093764  |

|                      |              |              |             |             |             |          |          |               |             |             |             |             |             |             |             |             |             |             |
|----------------------|--------------|--------------|-------------|-------------|-------------|----------|----------|---------------|-------------|-------------|-------------|-------------|-------------|-------------|-------------|-------------|-------------|-------------|
| ENSMUSG00000066632   | -1.681932886 | 8.339386734  | 2.595409829 | 0.107173714 | 0.999071534 | Pgk1-rs7 | Pgk1-rs7 | PGK1          | 757.312742  | 1547.944479 | 0.06732022  | 171.235039  | 119.4250775 | 260.2702518 | 433.074744  | 14.92180972 | 29.69895163 | 54.05186365 |
| ENSMUSG00000001435   | -0.45814558  | 9.527952439  | 2.594470372 | 0.107237282 | 0.999071534 | Col18a1  | Col18a1  | COL18A1       | 761.4533639 | 1315.942536 | 694.6773537 | 734.1320694 | 942.5163152 | 1076.225131 | 594.4746859 | 542.8499109 | 392.3718636 | 503.6561805 |
| ENSMUSG000000025422  | -0.909895264 | 0.800441007  | 2.594246066 | 0.107252465 | 0.999071534 | Agap2    | Agap2    | AGAP2         | 1.543960738 | 2.668051998 | 1.279084186 | 2.775284262 | 2.550699902 | 2.328389169 | 0.970729402 | 0.898071881 | 0.628549241 | 0.784307574 |
| ENSMUSG000000048232  | -0.619889465 | 2.766960461  | 2.590287533 | 0.107520815 | 0.999071534 | Fbxo10   | Fbxo10   | FBXO10        | 8.842684226 | 9.308536972 | 6.193460271 | 8.603381212 | 9.0255535   | 7.785551283 | 3.688771728 | 6.63191543  | 1.964216377 | 6.143742663 |
| ENSMUSG00000034430   | -0.445217799 | 4.448526249  | 2.588433047 | 0.107646784 | 0.999071534 | Zxdc     | Zxdc     | ZXDC          | 30.10723439 | 33.67674522 | 23.4947569  | 19.84328247 | 23.28331193 | 25.46675653 | 17.861421   | 24.31702324 | 8.32827744  | 15.16327977 |
| ENSMUSG000000052516  | 2.093326291  | -0.942399363 | 2.586048729 | 0.107808982 | 0.999071534 | Robo2    | Robo2    | ROBO2         | 0.140360067 | 0.177870133 | 0.403921322 | 0           | 0.065402562 | 0.363810808 | 1.035444696 | 0           | 1.571373102 | 0           |
| ENSMUSG000000017754  | -0.69732508  | 5.270876902  | 2.585375615 | 0.10785482  | 0.999071534 | Pltp     | Pltp     | PLTP          | 51.93322482 | 62.96602716 | 36.62219987 | 47.59612509 | 48.2016879  | 36.38108076 | 37.59958551 | 43.10745029 | 1.964216377 | 28.56186749 |
| ENSMUSG000000022346  | 0.412397392  | 6.497174662  | 2.584440403 | 0.107918542 | 0.999071534 | Myc      | Myc      | MYC           | 52.42448506 | 61.30590592 | 111.4149647 | 81.5933573  | 94.04888358 | 135.4831448 | 67.69219698 | 97.26809297 | 90.35395336 | 109.2801887 |
| ENSMUSG000000098488  | 1.176438718  | 1.726028279  | 2.584121546 | 0.107940278 | 0.999071534 | PLA2G4B  | Pla2g4b  | JMID7-PLA2G4B | 0.98252047  | 0.474320355 | 4.308494102 | 2.22022741  | 2.158284533 | 0.436572969 | 1.617882337 | 2.210638477 | 9.035395336 | 6.143742663 |
| ENSMUSG000000032249  | -0.362189969 | 6.499333722  | 2.583594342 | 0.107976226 | 0.999071534 | Anp32a   | Anp32a   | ANP32A        | 91.44458371 | 88.75719648 | 135.044362  | 107.6116473 | 103.4668524 | 116.4194584 | 63.09741114 | 75.36895556 | 55.15519588 | 79.67257773 |
| ENSMUSG000000000579  | 0.655552721  | 2.912747454  | 2.581100526 | 0.108146449 | 0.999071534 | Dynl1c   | Dynl1c   | DYNLT1        | 6.035482885 | 4.98036373  | 9.290190407 | 2.497755836 | 7.259684337 | 7.130691829 | 6.083237587 | 9.257048621 | 7.778296855 | 12.87571601 |
| ENSMUSG000000085183  | 0.591979828  | 4.440942429  | 2.581061073 | 0.108149144 | 0.999071534 | Gm12603  | Gm12603  |               | 19.22932919 | 7.826285862 | 22.01371205 | 21.92474567 | 17.98570444 | 11.78747017 | 42.51794782 | 19.55033403 | 26.71334273 | 20.71879175 |
| ENSMUSG000000029290  | 0.39811319   | 4.356444454  | 2.579322894 | 0.108267966 | 0.999071534 | Zfp326   | Zfp326   | ZNF326        | 13.33420637 | 20.92938568 | 19.859465   | 16.9986161  | 20.01318385 | 24.9574214  | 21.61490802 | 18.7213446  | 19.87786974 | 26.47038062 |
| ENSMUSG000000097995  | 1.084917968  | 0.951181013  | 2.579092586 | 0.108283721 | 0.999071534 | Gm24362  | Gm24362  |               | 2.035220973 | 0.118580089 | 2.01960661  | 0.971349492 | 0.915635862 | 1.8918162   | 0.906014109 | 2.141556024 | 3.8498641   | 2.61435858  |
| ENSMUSG000000022657  | -1.153157077 | 0.44221085   | 2.57838386  | 0.108332218 | 0.999071534 | Cd96     | Cd96     | CD96          | 2.877381375 | 2.845922132 | 1.144443746 | 1.179495811 | 0.719428178 | 1.164194584 | 0.19414588  | 0.207247357 | 0.628549241 | 1.503256184 |
| ENSMUSG000000045502  | -1.276143229 | 3.336996118  | 2.574558344 | 0.108594407 | 0.999071534 | Niacr1   | Hcar2    | HCAR2         | 7.368903522 | 55.08045125 | 3.769932339 | 2.428373729 | 5.363010051 | 0.873145938 | 2.588611739 | 16.44162367 | 1.099961171 | 6.53589645  |
| ENSMUSG000000008450  | 0.460007535  | 4.603680485  | 2.574254648 | 0.108615251 | 0.999071534 | Nutf2    | Nutf2    | NUTF2         | 15.57996745 | 14.05174052 | 29.82285761 | 21.50845303 | 24.46055804 | 30.48734568 | 29.83375029 | 19.55033403 | 31.58459935 | 21.96061207 |
| ENSMUSG0000000002265 | -0.659231877 | 3.397490347  | 2.573684752 | 0.108654378 | 0.999071534 | Peg3     | Peg3     | PEG3          | 9.333944461 | 20.27719519 | 17.09933597 | 11.72557601 | 7.521294584 | 7.276216152 | 4.012348196 | 14.57639746 | 6.756904338 | 5.155188876 |
| ENSMUSG000000051671  | 0.446509675  | 4.819504986  | 2.571648523 | 0.108794304 | 0.999071534 | Coa6     | Coa6     | COA6          | 20.42238976 | 18.73565403 | 25.24508263 | 30.52812688 | 27.99229636 | 20.51892955 | 37.7290161  | 32.53783508 | 34.33450228 | 26.79717545 |
| ENSMUSG000000027099  | 0.383719351  | 5.959168197  | 2.57121637  | 0.108824026 | 0.999071534 | Mtx2     | Mtx2     | MTX2          | 49.82782381 | 44.76398353 | 75.73524788 | 54.25680732 | 54.61113893 | 53.98952385 | 85.16532622 | 66.52640166 | 64.11202256 | 63.98642625 |
| ENSMUSG000000015027  | -0.459200809 | 4.161336739  | 2.569562039 | 0.108937888 | 0.999071534 | Galns    | Galns    | GALNS         | 21.1241901  | 27.21413038 | 20.80194809 | 21.57783514 | 15.89282247 | 23.86598898 | 17.27898336 | 13.33291331 | 6.599767028 | 13.92145944 |
| ENSMUSG000000032679  | 0.629643924  | 2.833225367  | 2.568772709 | 0.108992261 | 0.999071534 | Cd59a    | Cd59a    | CD59          | 8.070703857 | 4.802493597 | 6.933982695 | 4.648601139 | 4.120361381 | 9.895653967 | 12.03704459 | 3.799534882 | 7.306884924 | 8.235229528 |
| ENSMUSG000000020614  | -0.474681697 | 4.766457191  | 2.567214188 | 0.109099708 | 0.999071534 | Fam20a   | Fam20a   | FAM20A        | 16.49230788 | 42.74812202 | 41.60389617 | 32.74835429 | 29.36575016 | 21.7558863  | 14.75508691 | 30.53444396 | 17.6779474  | 24.05209894 |
| ENSMUSG000000081143  | 1.250475216  | 2.143659232  | 2.565774324 | 0.109199078 | 0.999071534 | Gm15823  | Gm15823  |               | 2.596661241 | 0.415030311 | 6.328100712 | 2.914048475 | 0.915635862 | 1.091432423 | 0.453007054 | 4.62852431  | 12.96382809 | 7.320204025 |
| ENSMUSG000000028676  | 0.39778097   | 7.110633654  | 2.561614719 | 0.109486705 | 0.999071534 | Srsf10   | Srsf10   | SRSF10        | 110.1124726 | 99.78514474 | 150.326052  | 119.9616622 | 137.9340024 | 161.8958094 | 173.760563  | 121.3087864 | 161.2228803 | 131.1754418 |
| ENSMUSG0000000028107 | 0.359648264  | 5.525080395  | 2.56073969  | 0.109547317 | 0.999071534 | Tars2    | Tars2    | TARS2         | 52.14376492 | 38.1827886  | 43.55618256 | 32.33206165 | 43.36189834 | 62.2116481  | 53.84312417 | 34.5412262  | 52.09101833 | 45.81663412 |
| ENSMUSG000000023755  | 0.593490311  | 3.352900059  | 2.560590189 | 0.109557677 | 0.999071534 | Rheb1l   | Rheb1l   | RHEBL1        | 7.018003354 | 5.869714396 | 8.818948865 | 10.96237283 | 8.829345815 | 6.69411886  | 8.477703446 | 15.8198816  | 13.19953406 | 12.28748533 |
| ENSMUSG000000079707  | -2.363881358 | -1.168832389 | 2.558178325 | 0.109724952 | 0.999071534 | Tcte3    | Tcte3    | TCTE3         | 1.122880537 | 0.296450222 | 0           | 1.248877918 | 0           | 0.291048646 | 0           | 0.207247357 | 0           | 0           |
| ENSMUSG000000030869  | 0.435326084  | 6.616762802  | 2.557125026 | 0.109798092 | 0.999071534 | Ndufab1  | Ndufab1  | NDUFAB1       | 92.84818438 | 61.36519596 | 91.48817944 | 100.3265261 | 85.08873264 | 80.62047497 | 114.4813542 | 87.52746718 | 143.6235015 | 97.84236986 |
| ENSMUSG000000037363  | 1.11365228   | 0.597371758  | 2.557081467 | 0.109801118 | 0.999071534 | Letm2    | Letm2    | LETM2         | 1.403600671 | 0.652190488 | 1.279084186 | 0.346910533 | 0.915635862 | 0.582097292 | 0.711868228 | 4.144947144 | 1.807079067 | 1.568615148 |
| ENSMUSG000000012429  | 0.409573251  | 4.882044936  | 2.557017432 | 0.109805566 | 0.999071534 | Mplkip   | Mplkip   | MPLKIP        | 27.30003305 | 20.63293545 | 27.1300488  | 28.79357422 | 26.74964769 | 21.82864846 | 38.05259257 | 34.47214374 | 32.60599187 | 70.78407228 |
| ENSMUSG000000062931  | 0.559721294  | 3.302295186  | 2.556959237 | 0.109809609 | 0.999071534 | Zfp938   | Zfp938   | ZNF788        | 6.947823321 | 6.225454663 | 9.89607239  | 7.770795933 | 10.00659192 | 6.69411886  | 11.97232929 | 14.3691501  | 10.8424744  | 10.65351121 |
| ENSMUSG000000037296  | 0.406044712  | 5.121850829  | 2.556511485 | 0.10984072  | 0.999071534 | Lsm1     | Lsm1     | LSM1          | 34.5285765  | 24.90181865 | 29.14965541 | 37.46633754 | 28.25390661 | 32.88849701 | 54.36084652 | 36.19920505 | 36.84869924 | 27.84291888 |
| ENSMUSG000000043190  | 0.486089524  | 3.780008018  | 2.551249594 | 0.11020706  | 0.999071534 | Rfesd    | Rfesd    | RFESD         | 12.84294614 | 13.39955004 | 10.77123525 | 9.921641237 | 12.03407133 | 9.822891806 | 15.59638573 | 15.88896405 | 16.49941757 | 16.66653595 |
| ENSMUSG000000025395  | 0.50929211   | 5.525202933  | 2.5482703   | 0.110415077 | 0.999071534 | Prim1    | Prim1    | PRIM1         | 55.8633067  | 21.2258359  | 38.97840758 | 34.69105327 | 46.63202642 | 56.97277247 | 98.43196138 | 26.32041436 | 42.19136779 | 38.03891734 |
| ENSMUSG000000097399  | 1.123600605  | 0.05195803   | 2.547650532 | 0.110458405 | 0.999071534 | Gm26555  | Gm26555  |               | 0.350900168 | 0.770770577 | 0.673202203 | 0.763203172 | 0.39241537  | 0.436572969 | 1.100159989 | 1.381649048 | 1.571373102 | 1.30717929  |
| ENSMUSG000000027797  | -0.396157653 | 5.586920968  | 2.547028842 | 0.110501885 | 0.999071534 | Dclk1    | Dclk1    | DCLK1         | 41.68693992 | 62.55099685 | 54.73133914 | 70.977895   | 51.14480317 | 51.29732387 | 26.27440915 | 31.01802112 | 41.01283796 | 49.86888992 |
| ENSMUSG000000004896  | 0.529104029  | 4.139247456  | 2.54614216  | 0.110563931 | 0.999071534 | Rmad1    | Rmad1    | RRNAD1        | 13.47456644 | 10.90936817 | 17.83985839 | 12.6969255  | 19.55536592 | 15.86215121 | 9.060141087 | 24.45518815 | 21.13496822 | 26.79717545 |
| ENSMUSG000000031403  | 0.529650587  | 7.233724742  | 2.542647099 | 0.110808874 | 0.999071534 | Dkc1     | Dkc1     | DKC1          | 121.8325382 | 71.74095373 | 156.115591  | 164.2274462 | 120.8639338 | 184.6703659 | 172.0779654 | 77.9250063  | 240.2629473 | 160.6523348 |

|                     |              |              |             |             |             |               |               |                |  |             |             |             |             |             |             |             |             |             |             |             |
|---------------------|--------------|--------------|-------------|-------------|-------------|---------------|---------------|----------------|--|-------------|-------------|-------------|-------------|-------------|-------------|-------------|-------------|-------------|-------------|-------------|
| ENSMUSG00000097954  | -1.064710551 | 0.71059547   | 2.541294123 | 0.110903854 | 0.999071534 | Gm4217        | Gm4217        |                |  |             | 2.526481208 | 2.312311732 | 0.740522424 | 2.567137942 | 2.354492217 | 0.654859454 | 0.906014109 | 1.174401691 | 0.078568655 | 1.895409971 |
| ENSMUSG00000032557  | 0.346375117  | 6.104885335  | 2.540654289 | 0.110948802 | 0.999071534 | Uba5          | Uba5          | UBA5           |  |             | 55.58258657 | 54.84329108 | 70.68623136 | 72.15739081 | 59.45092849 | 84.69515601 | 68.85707226 | 66.25007185 | 75.81875217 | 72.94060439 |
| ENSMUSG00000038859  | 1.770296057  | -0.299012389 | 2.540581935 | 0.110953886 | 0.999071534 | Baiap2l1      | Baiap2l1      | BAI/AP2L1      |  | 0           | 0.118580089 |             | 0           | 1.248877918 | 0.196207685 | 0.363810808 | 0.258861174 | 2.348803381 | 1.335667137 | 0.653589645 |
| ENSMUSG00000006143  | 1.350691335  | -0.241852987 | 2.540415752 | 0.110965564 | 0.999071534 | Upk3bl        | Upk3bl        | RP11-514P.6    |  | 0.631620302 | 0.355740266 | 0.538561763 |             | 0           | 0.588623054 | 0.291048646 | 0.711868228 | 1.588896405 | 0.707117896 | 1.568615148 |
| ENSMUSG00000072772  | -0.340731682 | 6.143719504  | 2.539628362 | 0.111020915 | 0.999071534 | Grccl0        | Grccl0        | C12orf57       |  | 96.70808622 | 87.86784581 | 78.7646578  | 72.50430134 | 74.29730997 | 81.4936209  | 67.56276639 | 48.08138687 | 39.04862158 | 70.5223227  |             |
| ENSMUSG00000032289  | -0.869619657 | 1.545308973  | 2.538957948 | 0.111068067 | 0.999071534 | Thsd4         | Thsd4         | THSD4          |  | 3.649361744 | 5.988294485 | 2.894769475 | 3.191576901 | 2.943115272 | 4.511254014 | 0.711868228 | 1.519813953 | 2.199922343 | 0.849666539 |             |
| ENSMUSG00000026429  | 0.537578303  | 4.060202098  | 2.537240394 | 0.111188966 | 0.999071534 | Ube2t         | Ube2t         | UBE2T          |  | 14.73780704 | 7.233385418 | 14.13724627 | 17.13738032 | 16.61225065 | 16.73529715 | 22.19734566 | 11.95126426 | 26.00622484 | 14.77112598 |             |
| ENSMUSG00000024842  | -1.435124182 | -0.207579721 | 2.535829132 | 0.111288414 | 0.999071534 | Cabp4         | Cabp4         | CABP4          |  | 1.473780704 | 0.474320355 | 1.144443746 | 1.179495811 | 1.24264867  | 0.436572969 | 0.582437641 |             | 0           | 0           | 0.915025503 |
| ENSMUSG00000001707  | 0.400148728  | 5.986979102  | 2.534320438 | 0.111394836 | 0.999071534 | Eef1e1        | Eef1e1        | EEF1E1-BLOC155 |  | 63.51293036 | 50.81156806 | 51.16336746 | 59.18293689 | 58.46989007 | 68.97852912 | 112.6046107 | 46.1470782  | 64.11202256 | 54.05186365 |             |
| ENSMUSG00000026842  | -0.354577964 | 5.835443616  | 2.534087321 | 0.11141129  | 0.999071534 | Abl1          | Abl1          | ABL1           |  | 64.77617096 | 67.64994067 | 72.70583797 | 57.03209158 | 70.30775372 | 73.05321017 | 35.65812671 | 61.34521773 | 29.38467701 | 47.77740305 |             |
| ENSMUSG000000024190 | -0.449821788 | 6.451098666  | 2.533468085 | 0.11145501  | 0.999071534 | Dusp1         | Dusp1         | DUSP1          |  | 142.325108  | 127.8886258 | 105.5581055 | 77.08352038 | 72.72764849 | 61.77507513 | 61.93253586 | 118.1309936 | 42.50564241 | 71.56806613 |             |
| ENSMUSG00000026725  | 1.23392      | 1.464292881  | 2.532424538 | 0.11152873  | 0.999071534 | Tnn           | Tnn           | TNN            |  | 0.421080201 | 3.379532531 | 1.615685288 | 1.179495811 | 1.504258917 | 0.291048646 | 10.80745401 | 1.105319238 | 0.785686551 | 4.771204409 |             |
| ENSMUSG00000036139  | 1.264931942  | -0.129271186 | 2.532022215 | 0.111557166 | 0.999071534 | Hoxc9         | Hoxc9         | HOXC9          |  | 0.210540101 | 0.355740266 | 0.875162864 | 0.138764213 | 0.850233301 | 0.9459081   | 1.100159989 | 0.414494714 | 1.964216377 | 0.784307574 |             |
| ENSMUSG00000055932  | -0.372104589 | 5.523434921  | 2.529278092 | 0.111751333 | 0.999071534 | Fto           | Fto           | FTO            |  | 45.96792197 | 66.52342982 | 47.9993171  | 51.55090517 | 56.7040209  | 69.19681561 | 30.67504911 | 32.95232979 | 24.59198905 | 42.54868589 |             |
| ENSMUSG00000031578  | 0.397299038  | 5.711296307  | 2.528285414 | 0.111821663 | 0.999071534 | Mak16         | Mak16         | MAK16          |  | 52.21394496 | 42.74812202 | 45.71042961 | 44.12701977 | 49.64054425 | 83.3854371  | 89.17767441 | 34.33397884 | 44.86270206 | 40.65327592 |             |
| ENSMUSG00000031485  | 0.328335466  | 5.357917325  | 2.525509993 | 0.112018559 | 0.999071534 | Prosc         | Prosc         | PROSC          |  | 44.7748614  | 31.89804389 | 37.69932339 | 37.46633754 | 36.29842169 | 53.91676169 | 39.86462078 | 42.34754332 | 39.75573948 | 44.11730104 |             |
| ENSMUSG00000058503  | 0.490988303  | 5.86065095   | 2.52377927  | 0.112141534 | 0.999071534 | Fam133b       | Fam133b       | FAM133B        |  | 32.35299546 | 33.02455473 | 66.44505748 | 68.06384652 | 48.13628533 | 42.63862665 | 52.28995713 | 57.13118813 | 85.40412809 | 76.53534744 |             |
| ENSMUSG000000062169 | 0.379803968  | 6.333424691  | 2.520708067 | 0.112360123 | 0.999071534 | Cnih4         | Cnih4         | CNIH4          |  | 82.04045921 | 64.32969818 | 67.92610232 | 77.2916667  | 71.28879214 | 87.02354518 | 137.0022763 | 79.58298516 | 51.46246909 | 88.8283276  |             |
| ENSMUSG000000220210 | -0.429050738 | 8.451834012  | 2.520459838 | 0.11237781  | 0.999071534 | Tsc22d1       | Tsc22d1       | TSC22D1        |  | 436.4496286 | 483.3917321 | 359.1533755 | 399.0164948 | 408.76601   | 230.7288142 | 313.2867357 | 381.3351372 | 200.1929332 | 305.618518  |             |
| ENSMUSG00000021646  | 0.444582868  | 3.918201107  | 2.519530862 | 0.112444033 | 0.999071534 | Mccc2         | Mccc2         | MCCC2          |  | 14.66762701 | 11.44297857 | 12.45424076 | 14.22333184 | 13.01510976 | 20.15511874 | 13.59021163 | 12.15851162 | 17.99222202 | 19.01945867 |             |
| ENSMUSG00000067567  | -0.626257874 | 3.06508421   | 2.518185231 | 0.112540033 | 0.999071534 | Hdac8         | Hdac8         | HDAC8          |  | 8.561964092 | 11.14652835 | 8.145746661 | 10.75422652 | 13.27672    | 10.47775126 | 8.348272859 | 5.941090906 | 1.571373102 | 6.405178521 |             |
| ENSMUSG00000079962  | 0.888408305  | 1.426166452  | 2.518011292 | 0.112552448 | 0.999071534 | Gm12643       | Gm12643       |                |  | 2.947561409 | 1.007930755 | 1.548365068 | 2.01208109  | 1.831271725 | 0.800383777 | 4.206490476 | 3.385040167 | 3.928432755 | 3.006512367 |             |
| ENSMUSG00000033099  | 0.366339492  | 5.846955     | 2.517603539 | 0.11258156  | 0.999071534 | Nol12         | Nol12         | RP1-37E16.12   |  | 46.10828204 | 39.54645962 | 63.07904646 | 54.53433575 | 56.63861834 | 49.11445903 | 65.75073817 | 61.41430018 | 59.79074653 | 70.65304063 |             |
| ENSMUSG000000331983 | -0.377562344 | 5.932465109  | 2.515690461 | 0.112718253 | 0.999071534 | 2310022805Rik | 2310022805Rik | C1orf198       |  | 52.84556526 | 80.75304048 | 75.93720855 | 70.70036657 | 76.91341244 | 76.25474528 | 32.03407027 | 64.17759827 | 38.65577831 | 48.88850545 |             |
| ENSMUSG00000047730  | 1.653967412  | -0.196626188 | 2.51523192  | 0.112751044 | 0.999071534 | Fcgbp         | Fcgbp         | FCGBP          |  | 0.140360067 | 0.059290044 | 0.134640441 | 1.318260024 | 0.130805123 | 3.710870238 | 0.517722348 | 0.345412262 | 1.257098482 | 0.065358965 |             |
| ENSMUSG00000028709  | 0.488202626  | 3.277750056  | 2.514992641 | 0.11276816  | 0.999071534 | Mob3c         | Mob3c         | MOB3C          |  | 7.93034379  | 9.427117061 | 7.472544458 | 8.187088573 | 8.306125323 | 12.51509178 | 9.772009315 | 9.326131073 | 9.663944577 | 12.67963911 |             |
| ENSMUSG00000071713  | -0.557725253 | 5.120449265  | 2.514762308 | 0.112784638 | 0.999071534 | Csf2rb        | Csf2rb        | CSF2RB         |  | 77.97001726 | 60.59442538 | 25.51436351 | 25.60199732 | 26.35723232 | 56.1723887  | 31.12805616 | 22.03730231 | 12.17814154 | 21.50309932 |             |
| ENSMUSG00000025591  | 0.38756244   | 4.614908886  | 2.514431094 | 0.112808338 | 0.999071534 | Tma16         | Tma16         | TMA16          |  | 17.40464832 | 19.98074497 | 26.99540836 | 20.39833933 | 24.78757084 | 25.75780518 | 28.47472913 | 24.6624355  | 26.32049946 | 26.60109855 |             |
| ENSMUSG00000014767  | 0.376066152  | 4.762528455  | 2.514367279 | 0.112812905 | 0.999071534 | Tbp           | Tbp           | TBP            |  | 23.29977114 | 21.7594463  | 25.31240285 | 23.03485937 | 28.71172454 | 24.15703763 | 30.35147264 | 32.95232979 | 26.55620542 | 31.17622607 |             |
| ENSMUSG000000094614 | 0.716408123  | 3.122668845  | 2.511438121 | 0.113022748 | 0.999071534 | Gm21769       | Gm21769       |                |  | 3.649361744 | 4.446753331 | 11.915679   | 6.521918016 | 7.063476652 | 6.112021568 | 4.46535525  | 11.53676955 | 11.15674902 | 16.60117698 |             |
| ENSMUSG00000021079  | 0.471023463  | 4.796130441  | 2.511240094 | 0.11303695  | 0.999071534 | Timm9         | Timm9         | TIMM9          |  | 23.51031124 | 13.57742017 | 28.67841387 | 30.38936267 | 23.47951961 | 26.04885382 | 40.77063489 | 18.79042705 | 34.25593362 | 32.15661054 |             |
| ENSMUSG000000090112 | 0.406503154  | 4.665588566  | 2.510602634 | 0.113082681 | 0.999071534 | Shprh         | Shprh         | SHPRH          |  | 17.47482835 | 18.08346354 | 24.10063888 | 21.36968882 | 31.78564494 | 28.01343219 | 21.29133155 | 32.81416489 | 24.19914577 | 31.69909778 |             |
| ENSMUSG00000023036  | -0.514628882 | 6.077316688  | 2.510303595 | 0.11310414  | 0.999071534 | Pcdhga9       | Pcdhga8       | PCDHGC4        |  | 41.61675989 | 47.37274548 | 101.3169316 | 118.9209306 | 98.4308552  | 51.4428482  | 30.8044797  | 72.05299785 | 42.58421106 | 69.28050238 |             |
| ENSMUSG000000004207 | -0.44539277  | 11.14380474  | 2.50968391  | 0.113148625 | 0.999071534 | Psap          | Psap          | PSAP           |  | 2866.15257  | 3875.197302 | 1820.608039 | 2233.132481 | 2802.303557 | 2267.996575 | 1811.44578  | 2352.050257 | 1121.488983 | 1829.266699 |             |
| ENSMUSG000000044005 | 0.928067034  | 0.782467047  | 2.509077947 | 0.113192143 | 0.999071534 | Gls2          | Gls2          | GLS2           |  | 1.122880537 | 1.719411288 | 0.336601102 | 1.387642131 | 1.111843547 | 1.964578361 | 1.359021163 | 2.625133191 | 2.278490998 | 1.699333077 |             |
| ENSMUSG000000068303 | 0.663478686  | 2.114941089  | 2.507773702 | 0.113285871 | 0.999071534 | Spr-ps1       | Spr-ps1       |                |  | 4.702062247 | 2.786632087 | 3.096730136 | 2.705902155 | 3.662543449 | 8.222124252 | 4.335924663 | 2.763298096 | 4.714119306 | 5.294076125 |             |
| ENSMUSG000000051431 | 0.445666189  | 4.950890889  | 2.507266724 | 0.113322327 | 0.999071534 | Gpr87         | Gpr87         | GPR87          |  | 34.5285765  | 22.53021687 | 20.66730764 | 27.12840366 | 30.73920395 | 29.6869619  | 62.57968879 | 29.84361943 | 22.86347863 | 26.79717545 |             |
| ENSMUSG000000081251 | -0.951482562 | 1.741075571  | 2.507176562 | 0.113328812 | 0.999071534 | Gm12164       | Gm12164       |                |  | 5.824942784 | 5.632554219 | 3.769932339 | 1.80393477  | 5.101399804 | 1.964578361 | 0.970729402 | 4.835771668 | 0.235705965 | 2.679717545 |             |
| ENSMUSG000000040093 | -0.657755054 | 3.117166541  | 2.506905022 | 0.113348345 | 0.999071534 | Bmf           | Bmf           | BMF            |  | 6.386383052 | 14.17032061 | 7.607184899 | 12.07248654 | 13.93074562 | 4.80230266  | 3.365195261 | 9.187966168 | 4.00700141  | 10.39207536 |             |

|                     |              |              |             |             |             |               |            |         |  |  |             |             |             |             |             |             |             |             |             |             |
|---------------------|--------------|--------------|-------------|-------------|-------------|---------------|------------|---------|--|--|-------------|-------------|-------------|-------------|-------------|-------------|-------------|-------------|-------------|-------------|
| ENSMUSG00000097649  | 1.483914709  | -0.469240992 | 2.506849263 | 0.113352357 | 0.999071534 | Gm10561       | Gm10561    |         |  |  | 0.140360067 | 0.177870133 | 0.201960661 | 0.485674746 | 0.588623054 | 0.727621615 | 1.48845175  | 0           | 0.707117896 | 1.30717929  |
| ENSMUSG00000035513  | -0.758625965 | 1.866406276  | 2.504411468 | 0.113527889 | 0.999071534 | Ntng2         | Ntng2      | NTNG2   |  |  | 4.280982046 | 6.344034752 | 2.692808814 | 4.787365352 | 4.774386997 | 2.546675653 | 1.423736457 | 4.766689215 | 1.492804447 | 2.352922722 |
| ENSMUSG00000026797  | -0.436291446 | 5.407087196  | 2.501956307 | 0.113704975 | 0.999071534 | Stxbp1        | Stxbp1     | STXBP1  |  |  | 53.19646542 | 63.14389729 | 53.11565385 | 27.82222473 | 57.16183883 | 57.62763193 | 27.30985385 | 44.35093444 | 15.24231909 | 35.62063566 |
| ENSMUSG00000020473  | -0.476679238 | 8.628788585  | 2.500887485 | 0.113782163 | 0.999071534 | Aebp1         | Aebp1      | AEBP1   |  |  | 479.9612494 | 812.8072188 | 332.7638491 | 331.0220303 | 447.4189239 | 374.5796075 | 257.1785763 | 420.9193824 | 210.3282897 | 348.9515115 |
| ENSMUSG00000075225  | -1.158540355 | 0.242617326  | 2.499839102 | 0.11385793  | 0.999071534 | Ccdc162       | Ccdc162    |         |  |  | 1.263240604 | 0.889350666 | 1.750325729 | 1.734552664 | 1.831271725 | 1.018670261 | 0.647152935 | 1.174401691 | 0           | 0.392153787 |
| ENSMUSG00000038463  | -0.342448392 | 6.483720808  | 2.499271676 | 0.113898961 | 0.999071534 | Olfml2b       | Olfml2b    | OLFML2B |  |  | 84.42658035 | 130.0823574 | 93.23850517 | 103.1018103 | 107.5872138 | 99.02930183 | 84.12988152 | 66.3191543  | 66.15480759 | 67.3850924  |
| ENSMUSG00000024158  | 0.429564319  | 4.582662009  | 2.495871248 | 0.114145193 | 0.999071534 | Hagh          | Hagh       | HAGH    |  |  | 22.24707063 | 20.75151554 | 18.71502126 | 16.58232347 | 27.59988099 | 19.8640701  | 39.34689844 | 21.96821986 | 23.25632191 | 25.88214994 |
| ENSMUSG00000039457  | -0.641913201 | 3.559197662  | 2.495824341 | 0.114148594 | 0.999071534 | Ppl           | Ppl        | PPL     |  |  | 10.31646493 | 18.14275359 | 11.78103856 | 22.06350988 | 10.66061754 | 5.384399953 | 4.400639957 | 10.56961522 | 12.88525944 | 8.496665386 |
| ENSMUSG00000031749  | -0.343593578 | 6.030286842  | 2.493844873 | 0.114292206 | 0.999071534 | St3gal2       | St3gal2    | ST3GAL2 |  |  | 75.51371609 | 97.35425292 | 58.36663104 | 70.70036657 | 77.37123037 | 84.40410737 | 54.94328416 | 53.05532344 | 37.08440521 | 54.77081226 |
| ENSMUSG00000097906  | -1.079041108 | 5.266422178  | 2.491909835 | 0.114432787 | 0.999071534 | Gm9625        | Gm9625     |         |  |  | 176.2922443 | 33.9139054  | 6.933982695 | 4.579219032 | 54.93815174 | 54.20781033 | 42.7120937  | 11.19135729 | 5.656943167 | 14.57504908 |
| ENSMUSG00000038545  | -0.363656682 | 5.267184576  | 2.491259768 | 0.114480058 | 0.999071534 | Cul7          | Cul7       | CUL7    |  |  | 44.21342113 | 57.15560281 | 42.47905904 | 41.14358918 | 39.37234208 | 55.00819411 | 26.46855503 | 29.84361943 | 20.34928167 | 35.62063566 |
| ENSMUSG00000081967  | -0.443023559 | 4.282857953  | 2.488339652 | 0.114692663 | 0.999071534 | Gm14017       | Gm14017    |         |  |  | 28.42291358 | 13.93316044 | 23.09083558 | 30.38936267 | 19.16295055 | 21.97417278 | 17.02012219 | 11.53676955 | 12.88525944 | 16.73189491 |
| ENSMUSG00000074034  | -1.030607797 | 0.188647705  | 2.487998134 | 0.114717557 | 0.999071534 | Gm5921        | Gm5921     |         |  |  | 1.754500839 | 0.711480533 | 1.144443746 | 1.248877918 | 2.158284533 | 0.800383777 | 0.841298815 | 0.690824524 | 0.235705965 | 0.653589645 |
| ENSMUSG00000029581  | -0.409221252 | 7.071607865  | 2.486546667 | 0.114823421 | 0.999071534 | Fscn1         | Fscn1      | FSCN1   |  |  | 148.500951  | 157.592938  | 194.9593581 | 105.3220377 | 193.5261798 | 188.2357119 | 107.8803942 | 103.6236786 | 60.49786443 | 117.776854  |
| ENSMUSG00000045854  | 0.552726683  | 3.373231476  | 2.486263723 | 0.114844071 | 0.999071534 | Lymr2         | Lymr2      | LYRM2   |  |  | 5.684582717 | 7.885575906 | 8.482347763 | 11.86434022 | 8.829345815 | 8.076599929 | 16.04939278 | 11.26043974 | 8.563983406 | 24.24825426 |
| ENSMUSG00000073490  | 0.444160975  | 3.835766807  | 2.484313704 | 0.114986496 | 0.999071534 | Al607873      | Al607873   |         |  |  | 10.52700503 | 11.91729893 | 13.12744297 | 11.58681179 | 15.10799173 | 22.77455656 | 11.13103048 | 14.09282029 | 13.19953406 | 18.56194592 |
| ENSMUSG00000036322  | -1.181956745 | 0.838270011  | 2.483775349 | 0.115025851 | 0.999071534 | H2-Ea-ps      | H2-Ea-ps   |         |  |  | 4.421342113 | 3.49811262  | 1.95228639  | 0.485674746 | 1.63506404  | 2.692199976 | 0.517722348 | 0.828989429 | 0           | 1.241820326 |
| ENSMUSG00000037458  | 0.419384402  | 7.509508571  | 2.481801962 | 0.115170236 | 0.999071534 | Azin1         | Azin1      | AZIN1   |  |  | 181.8364669 | 176.9214925 | 156.0482708 | 141.1925868 | 154.3500454 | 270.6024787 | 283.2588396 | 134.987112  | 181.336456  | 144.5086705 |
| ENSMUSG00000000605  | 0.362843593  | 5.809193436  | 2.480315772 | 0.115279106 | 0.999071534 | Clcn4-2       | Clcn4      | CLCN4   |  |  | 47.30134261 | 41.44374104 | 58.43395126 | 54.25680732 | 51.99503647 | 53.18914007 | 66.00959935 | 49.53211837 | 69.06184783 | 59.34593977 |
| ENSMUSG00000033475  | -0.377872898 | 6.767666653  | 2.479793148 | 0.115317418 | 0.999071534 | Tomm6         | Tomm6      | TOMM6   |  |  | 146.6762701 | 96.82064252 | 121.4456775 | 155.0690081 | 116.0241443 | 117.3653665 | 106.9743801 | 72.67473992 | 57.90509881 | 110.522009  |
| ENSMUSG00000049225  | 0.395927447  | 4.462419465  | 2.479456908 | 0.115342074 | 0.999071534 | Pdp1          | Pdp1       | PDP1    |  |  | 19.08896912 | 21.58157616 | 19.1862628  | 20.1208109  | 18.11650956 | 18.84539983 | 27.89229149 | 22.58996193 | 23.88487115 | 24.77104755 |
| ENSMUSG00000033669  | 0.495025195  | 3.821305405  | 2.479405839 | 0.115345819 | 0.999071534 | Zfp7          | Zfp7       | ZNF7    |  |  | 11.2989854  | 7.766995817 | 11.2424768  | 15.74973819 | 13.99614818 | 14.62519447 | 11.71346812 | 16.71795348 | 17.99222202 | 16.33974113 |
| ENSMUSG00000034617  | 0.504573613  | 3.571123011  | 2.477612357 | 0.115477436 | 0.999071534 | Mtrr          | Mtrr       | MTRR    |  |  | 12.42186594 | 10.79078808 | 9.357510628 | 5.203657991 | 13.14591488 | 17.46291877 | 16.89069616 | 13.47107822 | 7.69977282  | 12.41820326 |
| ENSMUSG00000064109  | -0.864466943 | 1.318789277  | 2.477486334 | 0.115486691 | 0.999071534 | Hcst          | Hcst       | HCST    |  |  | 4.982782381 | 2.727342043 | 2.356207712 | 4.579219032 | 1.046440986 | 2.328389169 | 2.006174098 | 1.312566595 | 0.628549241 | 2.0261279   |
| ENSMUSG00000019779  | 0.350189604  | 5.235249456  | 2.477331284 | 0.115498078 | 0.999071534 | Frk           | Frk        | FRK     |  |  | 35.1601968  | 30.00076247 | 36.15095832 | 25.67137942 | 45.1277675  | 49.04169687 | 50.34849833 | 34.74847355 | 34.0202766  | 36.01278944 |
| ENSMUSG00000076498  | -0.693232073 | 2.085496442  | 2.477228543 | 0.115505624 | 0.999071534 | Trbc2         | Trbc2      | TRBC1   |  |  | 6.73728322  | 5.810424352 | 6.058819831 | 4.787365352 | 2.943115272 | 3.856394561 | 1.941458804 | 2.348803381 | 2.199922343 | 4.967281302 |
| ENSMUSG00000029413  | -0.343294781 | 5.519114     | 2.477119975 | 0.115513599 | 0.999071534 | Naaa          | Naaa       | NAAA    |  |  | 64.98671106 | 40.43581029 | 52.50977187 | 56.96270948 | 50.29456987 | 54.78990763 | 42.25908664 | 34.88663846 | 25.22053829 | 41.56830143 |
| ENSMUSG00000000552  | -0.482709584 | 4.447142125  | 2.475151714 | 0.115658283 | 0.999071534 | Zfp385a       | Zfp385a    | ZNF385A |  |  | 19.86094949 | 22.94524719 | 36.68952009 | 21.71659935 | 30.08517833 | 25.32123221 | 7.830550511 | 22.38271458 | 12.02100423 | 21.24166346 |
| ENSMUSG00000085347  | 1.291352279  | 0.194981715  | 2.473182682 | 0.115803223 | 0.999071534 | 2210417K05Rik | Hk1os      |         |  |  | 0.98252047  | 0.177870133 | 0.336601102 | 0.485674746 | 1.111843547 | 0.9459081   | 0.129430587 | 0.898071881 | 1.649941757 | 3.202589261 |
| ENSMUSG00000096726  | 1.02609542   | 0.506434704  | 2.473155755 | 0.115805207 | 0.999071534 | Gm5558        | Gm5558     |         |  |  | 1.263240604 | 0.652190488 | 1.211763966 | 0.555056852 | 0.719428178 | 1.746291877 | 2.912188207 | 0.828989429 | 0.392843275 | 2.679717545 |
| ENSMUSG000000052033 | 0.397278536  | 5.277571672  | 2.472061136 | 0.11588587  | 0.999071534 | Pfdn4         | Pfdn4      | PFDN4   |  |  | 41.82729999 | 20.27719519 | 38.23788515 | 39.27027231 | 33.15909873 | 37.61803751 | 58.24376413 | 40.89681182 | 33.70595304 | 40.58791696 |
| ENSMUSG000000001211 | -0.329189125 | 6.326054918  | 2.471858644 | 0.115900798 | 0.999071534 | Agpat3        | Agpat3     | AGPAT3  |  |  | 84.49676038 | 93.91543034 | 82.33262948 | 97.62062391 | 104.3170857 | 96.55538834 | 66.5273217  | 67.7698858  | 45.09840803 | 73.72491196 |
| ENSMUSG000000022684 | 0.44645827   | 5.990607354  | 2.471476912 | 0.115928947 | 0.999071534 | Bfar          | Bfar       | BFAR    |  |  | 49.68746375 | 50.57440788 | 59.9149961  | 66.7455865  | 50.55618011 | 39.94642668 | 57.07888885 | 65.55924732 | 88.5468473  | 87.77708933 |
| ENSMUSG00000036565  | -0.394209444 | 6.133069305  | 2.471340364 | 0.115939018 | 0.999071534 | Ttyh3         | Ttyh3      | TTYH3   |  |  | 73.89957532 | 100.9116556 | 67.1855799  | 72.92059398 | 99.21568594 | 104.3409396 | 51.38394302 | 63.4176913  | 27.26323332 | 58.43091427 |
| ENSMUSG00000095677  | 0.523627297  | 5.930928252  | 2.47118524  | 0.11595046  | 0.999071534 | Dynlt1f       | Dynlt1f    | DYNLT1  |  |  | 35.01983674 | 26.79910007 | 81.59210705 | 60.3624327  | 53.95711332 | 40.38299964 | 75.84632396 | 76.81968706 | 88.2359967  | 50.78391542 |
| ENSMUSG00000041187  | -0.470009208 | 3.688399092  | 2.470521953 | 0.115999398 | 0.999071534 | Prkd2         | Prkd2      | PRKD2   |  |  | 18.10644865 | 20.39577528 | 14.81044848 | 9.782877023 | 14.25775843 | 14.98900527 | 8.348272859 | 11.12227484 | 6.678335683 | 11.56853672 |
| ENSMUSG00000059237  | -1.868161731 | 0.629022315  | 2.469989857 | 0.116038002 | 0.999071534 | Ppp1r2-ps4    | Ppp1r2-ps4 |         |  |  | 1.614140771 | 4.98036373  | 1.211763966 | 0           | 3.727946011 | 1.528005392 | 1.617882337 | 0           | 0           | 0           |
| ENSMUSG00000074579  | 0.60465142   | 2.785730658  | 2.467482059 | 0.116223978 | 0.999071534 | Lekr1         | Lekr1      | LEKR1   |  |  | 5.263502516 | 4.387463286 | 5.250977187 | 4.995511672 | 8.044515076 | 5.23887563  | 7.506974044 | 6.63191543  | 9.192532646 | 9.673126747 |
| ENSMUSG00000023913  | -0.387395364 | 7.875391209  | 2.465319037 | 0.116384069 | 0.999071534 | Pla2g7        | Pla2g7     | PLA2G7  |  |  | 265.3507068 | 328.407556  | 291.9677956 | 253.1753068 | 242.1856856 | 222.3611656 | 225.144506  | 206.003873  | 143.3877956 | 191.0442532 |

|                      |              |              |             |             |             |               |               |          |             |             |             |             |             |             |             |             |             |             |
|----------------------|--------------|--------------|-------------|-------------|-------------|---------------|---------------|----------|-------------|-------------|-------------|-------------|-------------|-------------|-------------|-------------|-------------|-------------|
| ENSMUSG00000095788   | -0.645974635 | 2.816454965  | 2.462921364 | 0.116561812 | 0.999071534 | Sirpb1a       | Sirpb1a       | SIRPG    | 11.9306057  | 6.877645151 | 11.84835878 | 5.411804311 | 7.913709953 | 9.531843159 | 6.536244641 | 4.559441858 | 4.00700141  | 2.156845829 |
| ENSMUSG00000032300   | -0.419656733 | 5.094084362  | 2.462913193 | 0.116562418 | 0.999071534 | 1700017B05Rik | 1700017B05Rik | C1SorF39 | 48.14350301 | 58.22282361 | 31.775144   | 29.6955416  | 35.2519807  | 53.3346644  | 20.25588686 | 24.86968286 | 17.99222202 | 29.60761092 |
| ENSMUSG00000096995   | -0.983243572 | 0.702442811  | 2.460340768 | 0.11675345  | 0.999071534 | 2810029C07Rik | 2810029C07Rik |          | 1.473780704 | 2.845922132 | 2.962089695 | 1.595788451 | 1.373453794 | 0.436572969 | 0.711868228 | 2.141556024 | 0.628549241 | 0.784307574 |
| ENSMUSG000000051048  | -0.623121519 | 2.458556163  | 2.459925048 | 0.116784355 | 0.999071534 | P4ha3         | P4ha3         | P4HA3    | 7.298723488 | 9.01208675  | 4.645095204 | 6.591300122 | 6.213243352 | 6.548594537 | 5.694945826 | 3.108710358 | 2.749902928 | 2.810435474 |
| ENSMUSG000000060509  | 1.059366823  | 0.177407415  | 2.459565087 | 0.116811121 | 0.999071534 | Xcr1          | Xcr1          | XCR1     | 0.701800335 | 0.592900444 | 0.605881983 | 1.179495811 | 0.261610246 | 1.164194584 | 0.841298815 | 1.105319238 | 1.571373102 | 1.764692042 |
| ENSMUSG000000062611  | -1.866359687 | 4.53057492   | 2.457970992 | 0.116929739 | 0.999071534 | Rps3a2        | Rps3a2        |          | 154.9575141 | 23.47885759 | 0.942483085 | 4.301690606 | 7.717502268 | 27.94067002 | 18.70271982 | 0           | 0           | 6.731973344 |
| ENSMUSG000000026349  | 0.373827391  | 5.385215332  | 2.457733885 | 0.116947394 | 0.999071534 | Ccnt2         | Ccnt2         | CCNT2    | 31.65119513 | 38.1827886  | 37.49736273 | 36.84189858 | 44.21213164 | 39.36432938 | 32.22821615 | 57.20027058 | 40.54142603 | 54.57473536 |
| ENSMUSG000000027620  | 0.485416855  | 8.306365195  | 2.457603846 | 0.116957078 | 0.999071534 | Rbm39         | Rbm39         | RBM39    | 220.8565656 | 263.5442474 | 319.8383668 | 283.6340516 | 278.0262893 | 257.0687167 | 215.0489202 | 483.6462492 | 364.1657164 | 414.1143991 |
| ENSMUSG000000096696  | 0.506127568  | 3.668787515  | 2.456046456 | 0.117073123 | 0.999071534 | Zfp960        | Zfp960        | ZNF788   | 15.50978741 | 13.28096995 | 7.539864678 | 6.521918016 | 11.5762534  | 11.49642152 | 14.8845175  | 13.54016067 | 12.17814154 | 18.43122799 |
| ENSMUSG000000016493  | 0.908624303  | 1.542872148  | 2.455719481 | 0.117097503 | 0.999071534 | Cd46          | Cd46          | CD46     | 1.965040939 | 1.48225111  | 1.077123525 | 3.330341114 | 2.158284533 | 1.382481069 | 1.68259763  | 4.214029596 | 6.206923753 | 2.941153403 |
| ENSMUSG000000048930  | -0.395829135 | 4.420442649  | 2.454012578 | 0.117224864 | 0.999071534 | Tada3         | Tada3         | TADA3    | 23.58049127 | 25.31684896 | 26.18756571 | 22.96547727 | 27.59988099 | 25.83056734 | 12.23119047 | 22.31363212 | 11.62816095 | 18.43122799 |
| ENSMUSG000000026388  | 0.719863341  | 2.618195834  | 2.453806759 | 0.117240232 | 0.999071534 | 3110009E18Rik | 3110009E18Rik | C2orf76  | 3.017741442 | 3.142372354 | 5.789538949 | 5.82809695  | 5.690022859 | 2.255627007 | 7.183397576 | 8.773471454 | 8.32827744  | 7.97379367  |
| ENSMUSG000000021963  | 0.406835242  | 6.837616497  | 2.452740631 | 0.117319871 | 0.999071534 | Sap18         | Sap18         | SAP18    | 89.3391827  | 94.80478101 | 141.1705021 | 75.07143929 | 110.8573419 | 99.97520993 | 116.422813  | 127.9407018 | 144.5663254 | 122.4826995 |
| ENSMUSG000000027207  | -0.401810929 | 4.647055518  | 2.450884903 | 0.117458635 | 0.999071534 | Galk2         | Galk2         | GALK2    | 32.07227533 | 25.61329918 | 31.30390246 | 30.31998056 | 27.86149124 | 31.43325378 | 27.63343032 | 18.99767441 | 9.742513232 | 19.34625349 |
| ENSMUSG000000031242  | 0.3449768    | 5.604134012  | 2.449411498 | 0.117568939 | 0.999071534 | 2610002M06Rik | 2610002M06Rik |          | 40.84477952 | 46.42410477 | 34.06403149 | 45.584044   | 55.0035543  | 45.69463744 | 59.27920883 | 54.92054965 | 48.00544826 | 50.84927438 |
| ENSMUSG000000029361  | 1.405852893  | -0.486298789 | 2.448654386 | 0.117625664 | 0.999071534 | Nos1          | Nos1          | NOS1     | 0.421080201 | 0.5336104   | 0.471241542 | 0           | 0.261610246 | 0.291048646 | 0.388291761 | 0.690824524 | 1.335667137 | 1.241820326 |
| ENSMUSG000000041189  | 0.465893289  | 3.861311579  | 2.446849928 | 0.11776098  | 0.999071534 | Chrb1         | Chrb1         | CHRNB1   | 12.21132584 | 7.648415729 | 12.05031944 | 16.51294136 | 14.06155074 | 14.77071879 | 16.8906916  | 15.9580465  | 14.53520119 | 17.71227938 |
| ENSMUSG000000034674  | 0.381836388  | 5.314037299  | 2.444643572 | 0.117926669 | 0.999071534 | Tdg           | Tdg           | TDG      | 44.91522147 | 37.82704833 | 29.62089695 | 27.40593209 | 39.89556257 | 60.61088055 | 63.09741114 | 28.66921774 | 32.99883514 | 35.09776394 |
| ENSMUSG000000020901  | -0.581244193 | 3.498880211  | 2.441628204 | 0.118153528 | 0.999071534 | Plk3r5        | Plk3r5        | PIK3R5   | 21.1241901  | 18.37991377 | 8.011106221 | 9.366584384 | 13.14591488 | 16.58977283 | 9.383717555 | 7.668152216 | 3.457020824 | 8.300588492 |
| ENSMUSG000000097583  | 1.227024185  | 0.889339254  | 2.440713966 | 0.118222406 | 0.999071534 | 6430590A07Rik | 6430590A07Rik |          | 0.210540101 | 0.5336104   | 1.750325729 | 2.150845303 | 0.654025616 | 0.727621615 | 0.323576467 | 1.519813953 | 4.16413872  | 4.248332693 |
| ENSMUSG000000061740  | -1.083452087 | 0.594413386  | 2.440357116 | 0.118249302 | 0.999071534 | Cyp2d22       | Cyp2d22       | CYP2D6   | 0.912340436 | 3.438822576 | 1.615685288 | 1.457024238 | 2.223687094 | 1.309718907 | 1.164875283 | 0.690824524 | 0           | 1.241820326 |
| ENSMUSG000000081974  | 0.698327215  | 2.627059259  | 2.439925758 | 0.118281824 | 0.999071534 | Gm11960       | Gm11960       |          | 3.438821644 | 4.387463286 | 6.933982695 | 3.607869541 | 5.624620297 | 3.710870238 | 3.624056435 | 10.84594503 | 8.249708785 | 8.300588492 |
| ENSMUSG000000050940  | -0.460080989 | 9.932191146  | 2.439323475 | 0.118327248 | 0.999071534 | Gm5506        | Eno1b         | ENO1     | 1040.138277 | 1534.076009 | 936.6262256 | 852.2204147 | 1543.435051 | 1003.535732 | 828.8734789 | 1058.274088 | 370.5297774 | 798.4251104 |
| ENSMUSG000000087153  | 0.362492278  | 5.324743944  | 2.438712522 | 0.118373347 | 0.999071534 | Gm6483        | Gm6483        |          | 27.58075318 | 38.41994878 | 41.19997485 | 39.82532916 | 33.74772178 | 41.18338342 | 34.88154319 | 50.77560251 | 42.3485051  | 44.70553172 |
| ENSMUSG000000070000  | -0.878626839 | 1.18478364   | 2.437907699 | 0.118434103 | 0.999071534 | Fcho1         | Fcho1         | FCHO1    | 4.280982046 | 2.371601776 | 3.433331237 | 2.775284262 | 1.504258917 | 1.819054038 | 0.388291761 | 1.72706131  | 1.964216377 | 1.241820326 |
| ENSMUSG000000018648  | 0.415568358  | 5.469552038  | 2.436414016 | 0.118546954 | 0.999071534 | Dusp14        | Dusp14        | DUSP14   | 29.26507399 | 28.51851136 | 44.09474432 | 40.3110039  | 54.153321   | 42.85691314 | 42.58266311 | 47.18331499 | 61.91210022 | 41.96045521 |
| ENSMUSG000000022602  | -0.883708412 | 1.863541398  | 2.435069099 | 0.118648667 | 0.999071534 | Arc           | Arc           | ARC      | 3.859901845 | 7.174095373 | 4.375814322 | 4.093544286 | 4.054958819 | 3.492583753 | 1.29430587  | 5.18118393  | 0.235705965 | 2.091486864 |
| ENSMUSG000000095493  | 1.533852367  | -0.262220371 | 2.433266665 | 0.118785132 | 0.999071534 | A630023A22Rik | A630023A22Rik |          | 0.771980369 | 0.059290044 | 0.942483085 | 0           | 0.130805123 | 0.218286485 | 0.517722348 | 1.588896405 | 1.021392516 | 1.568615148 |
| ENSMUSG000000035504  | 1.245548796  | 0.202193328  | 2.43319181  | 0.118790803 | 0.999071534 | Reep6         | Reep6         | REEP6    | 0.701800335 | 0.592900444 | 1.077123525 | 0           | 0.784830739 | 3.128772945 | 0.388291761 | 1.934308667 | 0.785686551 | 1.045743432 |
| ENSMUSG000000073494  | -1.511003242 | 0.481928491  | 2.431496994 | 0.118919285 | 0.999071534 | Sh2d1b2       | Sh2d1b2       | SH2D1B   | 3.228281543 | 5.454684085 | 0.134640441 | 0.555056852 | 0.327012808 | 0.363810808 | 0.064715293 | 1.105319238 | 0.078568655 | 1.503256184 |
| ENSMUSG000000026004  | 0.574786792  | 3.577641553  | 2.430277862 | 0.119011801 | 0.999071534 | Kansl1l       | Kansl1l       | KANSL1L  | 6.807463254 | 8.893506661 | 9.492151068 | 9.574730704 | 14.51936867 | 9.168032352 | 9.124856381 | 21.89913741 | 8.249708785 | 19.1501766  |
| ENSMUSG000000019564  | 0.480145148  | 3.894600136  | 2.429227313 | 0.119091588 | 0.999071534 | Arid3a        | Arid3a        | ARID3A   | 10.456825   | 17.72772328 | 10.03071283 | 11.44804758 | 14.32316099 | 14.1886215  | 11.26046107 | 20.79381817 | 17.12796681 | 17.84299731 |
| ENSMUSG000000036305  | 0.483958707  | 8.315186668  | 2.428107221 | 0.119176722 | 0.999071534 | Rp19-ps       | Rp19-ps       |          | 217.7686441 | 285.718724  | 276.6187854 | 319.3658364 | 273.3827075 | 187.7991389 | 357.0342741 | 432.8015642 | 351.2804569 | 408.689605  |
| ENSMUSG0000000023781 | -1.257701814 | -0.228060708 | 2.427177811 | 0.119247414 | 0.999071534 | Hes7          | Hes7          | HES7     | 0.631620302 | 0.415030311 | 1.346404407 | 2.01208109  | 0.784830739 | 0.509335131 | 0.388291761 | 0.759906976 | 0.31427462  | 0.065358965 |
| ENSMUSG000000031910  | 0.909856762  | 1.045729353  | 2.427118708 | 0.119251911 | 0.999071534 | Has3          | Has3          | HAS3     | 1.122880537 | 1.422961066 | 1.211763966 | 1.942698983 | 1.24264867  | 0.800383777 | 1.553167044 | 2.141556024 | 2.749902928 | 4.509768551 |
| ENSMUSG000000041057  | 0.365719906  | 6.376681977  | 2.426295668 | 0.119314553 | 0.999071534 | Wdr43         | Wdr43         | WDR43    | 83.02297968 | 69.31006191 | 86.3718427  | 65.6354728  | 72.53144081 | 140.2854474 | 113.9636318 | 54.02247777 | 71.65461345 | 81.11047495 |
| ENSMUSG000000034066  | -0.581317073 | 2.36723421   | 2.421575168 | 0.11967454  | 0.999071534 | Farp2         | Farp2         | FARP2    | 6.947823321 | 6.877645151 | 7.001302916 | 5.481186417 | 4.970594681 | 4.656778337 | 4.400639957 | 3.730452429 | 2.592765618 | 4.248332693 |
| ENSMUSG000000079491  | -0.323128819 | 5.942002169  | 2.420033125 | 0.119792397 | 0.999071534 | H2-T10        | H2-T10        |          | 71.93453438 | 79.68581968 | 70.01302916 | 65.84361911 | 66.64521027 | 59.73773461 | 42.32380194 | 57.82201265 | 41.6413872  | 62.22173421 |
| ENSMUSG000000021886  | -0.627328317 | 3.430212159  | 2.419881668 | 0.11980398  | 0.999071534 | Gpr65         | Gpr65         | GPR65    | 12.91312617 | 12.03587901 | 10.83855548 | 13.46012867 | 17.92030188 | 20.2278809  | 8.348272859 | 5.250266382 | 2.199922343 | 7.581639883 |

|                     |              |              |             |             |             |               |               |         |             |             |             |             |             |             |             |             |             |             |
|---------------------|--------------|--------------|-------------|-------------|-------------|---------------|---------------|---------|-------------|-------------|-------------|-------------|-------------|-------------|-------------|-------------|-------------|-------------|
| ENSMUSG00000064359  | 1.041625121  | 3.137109158  | 2.416215848 | 0.120084702 | 0.999071534 | mt-Tg         | mt-Tg         |         | 4.421342113 | 0.948640711 | 7.203263577 | 12.07248654 | 4.316569065 | 3.056010784 | 2.459181152 | 7.184575049 | 27.57759794 | 10.1306395  |
| ENSMUSG00000049950  | 0.586362543  | 3.188032731  | 2.415445246 | 0.120143806 | 0.999071534 | Rpp38         | Rpp38         | RPP38   | 4.280982046 | 5.336103997 | 7.674505119 | 9.782877023 | 10.00659192 | 7.64002696  | 13.39606575 | 10.70778012 | 10.8424744  | 8.300588492 |
| ENSMUSG00000039989  | -0.480172032 | 3.982179398  | 2.415143949 | 0.120166923 | 0.999071534 | Cbx4          | Cbx4          | CBX4    | 15.86068758 | 18.49849386 | 18.98430214 | 17.83120138 | 23.6757273  | 17.24463228 | 9.254286968 | 19.41216912 | 5.735511822 | 13.00643394 |
| ENSMUSG00000024208  | 0.479610611  | 7.544594911  | 2.414065732 | 0.120249693 | 0.999071534 | Uqcc2         | Uqcc2         | UQCC2   | 170.6778416 | 129.6080371 | 161.9724501 | 185.9440456 | 158.3396016 | 101.4304532 | 260.6084868 | 213.8792726 | 230.1275908 | 204.9657127 |
| ENSMUSG00000084917  | 1.439020215  | 0.245709688  | 2.413096201 | 0.120324172 | 0.999071534 | Gm17477       | Gm17477       |         | 0.140360067 | 0.770770577 | 1.548365068 | 0           | 0.523220493 | 0.218286485 | 0.453007054 | 2.072473572 | 1.728510412 | 2.679717545 |
| ENSMUSG00000025893  | 0.813449016  | 2.269870568  | 2.41291095  | 0.120338409 | 0.999071534 | Kbtbd3        | Kbtbd3        | KBTBD3  | 4.912602348 | 1.778701332 | 1.279084186 | 6.521918016 | 3.008517833 | 2.764962138 | 9.254286968 | 4.144947144 | 6.285492408 | 5.555511983 |
| ENSMUSG00000046947  | -0.545768911 | 2.990536729  | 2.41176085  | 0.120426838 | 0.999071534 | Adck2         | Adck2         | ADCK2   | 9.193584394 | 14.58535092 | 7.405224238 | 9.574730704 | 7.325086899 | 8.076599929 | 7.053966989 | 6.35558562  | 4.242707375 | 5.359435089 |
| ENSMUSG00000025326  | 0.456777043  | 6.778665324  | 2.411289821 | 0.120463075 | 0.999071534 | Ube3a         | Ube3a         | UBE3A   | 64.77617096 | 87.86784581 | 114.9156161 | 119.5453696 | 89.66691195 | 103.1039829 | 80.11753333 | 106.3869767 | 166.7226861 | 134.1165952 |
| ENSMUSG00000034795  | 0.428010086  | 4.151519787  | 2.411081116 | 0.120479135 | 0.999071534 | Ccdc122       | Ccdc122       | CCDC122 | 14.24654681 | 11.85800888 | 16.96469553 | 19.21884351 | 15.43500454 | 17.3901566  | 26.59798562 | 16.71795348 | 16.1065743  | 20.32663796 |
| ENSMUSG00000030880  | 0.443184907  | 4.317818671  | 2.408820585 | 0.120653237 | 0.999071534 | Polr3e        | Polr3e        | POLR3E  | 23.019051   | 16.48263235 | 19.32090324 | 14.36209606 | 14.19235587 | 36.16279428 | 22.26206096 | 10.91502748 | 18.5422026  | 24.90176548 |
| ENSMUSG00000042918  | -0.671875108 | 2.131611237  | 2.403419762 | 0.121070326 | 0.999071534 | Mamstr        | Mamstr        | MAMSTR  | 3.789721811 | 4.091013064 | 4.510454763 | 7.285121188 | 7.259684337 | 3.419821592 | 2.070889391 | 3.868617334 | 3.355589479 | 2.679717545 |
| ENSMUSG00000062376  | 0.508215513  | 4.041101778  | 2.402134342 | 0.121169831 | 0.999071534 | 2010012O05Rik | Borcs7        | BORCS7  | 15.79050755 | 10.61291795 | 12.99280253 | 18.24749402 | 11.96866877 | 16.0804377  | 14.30207986 | 11.88218181 | 26.63477408 | 20.39199693 |
| ENSMUSG00000031780  | -1.071456748 | 0.349679506  | 2.401038357 | 0.121254743 | 0.999071534 | Ccl17         | Ccl17         | CCL17   | 1.754500839 | 0.889350666 | 2.154247051 | 2.428373729 | 0.719428178 | 1.236956746 | 0.258861174 | 0.414494714 | 1.099961171 | 0.522871716 |
| ENSMUSG00000065087  | 1.064309075  | 0.43077116   | 2.400322383 | 0.121310248 | 0.999071534 | Snord22       | Snord22       |         | 1.824680872 | 0.474320355 | 0.673202203 | 0.416292639 | 0.784830739 | 0.9459081   | 0.647152935 | 1.72706131  | 2.671334273 | 1.633974113 |
| ENSMUSG00000058729  | 0.465188889  | 3.918308651  | 2.399363916 | 0.121384598 | 0.999071534 | Lin9          | Lin9          | LIN9    | 12.28150587 | 10.19788764 | 18.10913927 | 10.68484441 | 14.19235587 | 24.0115133  | 22.65035272 | 9.947873145 | 13.35667137 | 15.42471562 |
| ENSMUSG00000024013  | -0.527563843 | 3.337754564  | 2.398846988 | 0.121424717 | 0.999071534 | Fgd2          | Fgd2          | FGD2    | 13.61492651 | 10.19788764 | 12.52156098 | 13.87642131 | 10.79142266 | 13.67928637 | 8.73656462  | 5.18118393  | 3.69272679  | 9.803844676 |
| ENSMUSG00000025058  | -0.775078322 | 1.782143511  | 2.398570069 | 0.121446215 | 0.999071534 | 5430427O19Rik | 5430427O19Rik | Cxorf21 | 6.386383052 | 2.54947191  | 4.981696305 | 4.02416218  | 3.727946011 | 3.856394561 | 3.882917609 | 1.243484143 | 0.785686551 | 2.483640651 |
| ENSMUSG00000058756  | -0.394426996 | 5.871195597  | 2.397174434 | 0.121554627 | 0.999071534 | Thra          | Thra          | THRA    | 52.70520519 | 88.57932634 | 66.5123777  | 66.05176543 | 70.37315628 | 44.31215637 | 29.96318088 | 65.69741223 | 38.34150369 | 63.39819557 |
| ENSMUSG00000079555  | 0.443460602  | 4.882087389  | 2.395382872 | 0.121693952 | 0.999071534 | Haus3         | Haus3         | HAUS3   | 33.8969562  | 18.14275359 | 25.98560505 | 26.5039647  | 24.59136316 | 39.07328074 | 50.15435245 | 19.75758138 | 33.31310976 | 20.71879175 |
| ENSMUSG00000034164  | -0.633151763 | 3.07883703   | 2.394814934 | 0.121738156 | 0.999071534 | Emid1         | Emid1         | EMID1   | 12.63240604 | 13.99245048 | 9.89607239  | 11.10113705 | 4.708984435 | 4.947826984 | 9.772009315 | 6.424668073 | 2.592765618 | 7.97379367  |
| ENSMUSG00000021569  | 0.58645      | 4.447058532  | 2.392478981 | 0.121920155 | 0.999071534 | Trip13        | Trip13        | TRIP13  | 23.72085134 | 12.56948941 | 20.46534698 | 12.83568971 | 20.86341715 | 45.47635095 | 44.6535525  | 10.50053276 | 19.40645781 | 9.999921569 |
| ENSMUSG00000026617  | 0.421925411  | 4.435446957  | 2.391455179 | 0.122000017 | 0.999071534 | Bpnt1         | Bpnt1         | BPNT1   | 21.47509026 | 18.08346354 | 16.69541464 | 13.7376571  | 26.03021952 | 33.97992943 | 34.10495966 | 15.75079915 | 18.30649664 | 18.95409971 |
| ENSMUSG00000026608  | 0.375981589  | 4.540050314  | 2.390278817 | 0.122091851 | 0.999071534 | Kctd3         | Kctd3         | KCTD3   | 23.8612114  | 20.81080559 | 22.68691426 | 15.05591712 | 22.56388375 | 33.39783214 | 29.51017383 | 19.34308667 | 22.54920401 | 22.2874069  |
| ENSMUSG00000060743  | 0.508040727  | 9.464165516  | 2.38991     | 0.122120659 | 0.999071534 | H3f3a         | H3f3a         |         | 506.4893021 | 427.18477   | 624.0584426 | 784.3647145 | 667.4985436 | 418.0913801 | 750.179682  | 850.8885661 | 1000.650391 | 809.2746985 |
| ENSMUSG00000036896  | -0.523177321 | 7.265488604  | 2.389421746 | 0.122158808 | 0.999071534 | C1qc          | C1qc          | CIQC    | 208.7154198 | 168.9173365 | 151.2012149 | 208.0769375 | 203.2711614 | 263.3262625 | 172.5309724 | 74.47088368 | 40.46285738 | 99.99921569 |
| ENSMUSG00000054400  | 0.469524596  | 4.283661366  | 2.389315298 | 0.122167126 | 0.999071534 | Cklf          | Cklf          | CKLF    | 19.36968926 | 11.6208487  | 17.23397641 | 20.1208109  | 15.56580966 | 12.6606161  | 26.27440915 | 20.37932346 | 24.43485174 | 21.1763045  |
| ENSMUSG00000000149  | -0.343377826 | 6.625648008  | 2.388880407 | 0.122201119 | 0.999071534 | Gna12         | Gna12         | GNA12   | 126.8153206 | 126.2877946 | 105.6254257 | 102.1304608 | 112.7540162 | 140.5764961 | 71.38096871 | 71.84575049 | 58.6122167  | 89.41106344 |
| ENSMUSG00000040009  | 1.033009409  | 1.178133343  | 2.387257025 | 0.122328102 | 0.999071534 | Gnaz          | Gnaz          | GNAZ    | 0.631620302 | 0.652190488 | 1.88496617  | 1.665170557 | 2.485297341 | 1.309718907 | 0.841298815 | 1.4507315   | 5.892649132 | 3.398666154 |
| ENSMUSG00000050737  | -0.401575924 | 6.336995077  | 2.385803757 | 0.122441903 | 0.999071534 | Ptges         | Ptges         | PTGES   | 110.6739129 | 129.9044873 | 68.06074277 | 84.64616999 | 84.76171983 | 53.3346644  | 82.12370743 | 86.14581814 | 38.81291562 | 75.22816815 |
| ENSMUSG00000036315  | -0.349872431 | 4.80772746   | 2.385397431 | 0.122473742 | 0.999071534 | Znrd1         | Znrd1         | ZNRD1   | 32.2126354  | 27.86632087 | 34.06403149 | 37.25819122 | 30.21598346 | 28.01343219 | 28.99245148 | 22.24454967 | 17.75651605 | 22.22204793 |
| ENSMUSG00000031887  | -0.329855913 | 5.136770557  | 2.382357765 | 0.122712216 | 0.999071534 | Tradd         | Tradd         | TRADD   | 49.68746375 | 36.16692709 | 36.0836381  | 35.31549223 | 46.04340336 | 39.50985371 | 30.99862558 | 25.90591965 | 22.15636074 | 33.39843086 |
| ENSMUSG00000040265  | 1.185103319  | 0.433681512  | 2.381195325 | 0.12280355  | 0.999071534 | Dnm3          | Dnm3          | DNM3    | 0.701800335 | 1.245090933 | 0.875162864 | 0.555056852 | 0.523220493 | 0.9459081   | 1.423736457 | 3.17779281  | 2.278490998 | 0.065358965 |
| ENSMUSG00000080972  | -0.859007754 | 0.701929157  | 2.381149372 | 0.122807162 | 0.999071534 | Gm16061       | Gm16061       |         | 3.158101509 | 1.778701332 | 2.086926831 | 1.179495811 | 1.831271725 | 1.309718907 | 1.359021163 | 0.967154334 | 0.785686551 | 0.71894861  |
| ENSMUSG00000086937  | 1.528185358  | -0.695202937 | 2.380841625 | 0.122831356 | 0.999071534 | Gm15063       | Gm15063       |         | 0           | 0.415030311 | 0.538561763 | 0.277528426 | 0.065402562 | 0.145524323 | 0.388291761 | 1.105319238 | 1.021392516 | 0.71894861  |
| ENSMUSG00000073164  | -0.66007216  | 2.093578035  | 2.380838885 | 0.122831571 | 0.999071534 | 2410018L13Rik | 2410018L13Rik |         | 4.842422314 | 4.03172302  | 7.203263577 | 5.411804311 | 4.708984435 | 3.128772945 | 1.941458804 | 4.697606763 | 2.357059653 | 3.267948225 |
| ENSMUSG00000028104  | -0.477466109 | 3.311331962  | 2.378731172 | 0.122997411 | 0.999071534 | Polr3gl       | Polr3gl       | POLR3GL | 12.49204597 | 12.45090933 | 9.82875217  | 13.18260024 | 11.11843547 | 11.20537287 | 8.542418739 | 7.253657501 | 4.714119306 | 8.692742279 |
| ENSMUSG00000001467  | 0.523698965  | 6.446553696  | 2.378629413 | 0.123005424 | 0.999071534 | Cyp51         | Cyp51         | CYP51A1 | 96.14664595 | 39.96148993 | 66.10845638 | 89.43353534 | 78.28686623 | 161.2409499 | 167.4184642 | 35.23205072 | 66.15480759 | 82.61373113 |
| ENSMUSG00000000530  | -0.545028096 | 3.646289691  | 2.37823094  | 0.123036807 | 0.999071534 | Acvrl1        | Acvrl1        | ACVRL1  | 14.94834714 | 24.90181865 | 11.5790779  | 10.12978756 | 15.17339429 | 17.89949173 | 12.81362811 | 7.391822406 | 4.00700141  | 8.888819173 |
| ENSMUSG000000002781 | -0.60612063  | 3.062715035  | 2.378110658 | 0.123046282 | 0.999071534 | Tmem143       | Tmem143       | TMEM143 | 11.22880537 | 9.249246928 | 9.424830848 | 11.03175494 | 10.52981242 | 8.58593506  | 9.319002261 | 5.664761096 | 1.492804447 | 7.581639883 |

|                      |              |              |             |             |             |              |              |                |             |             |             |             |             |             |             |             |             |             |
|----------------------|--------------|--------------|-------------|-------------|-------------|--------------|--------------|----------------|-------------|-------------|-------------|-------------|-------------|-------------|-------------|-------------|-------------|-------------|
| ENSMUSG00000023147   | 0.606765267  | 3.150704651  | 2.37724004  | 0.123114887 | 0.999071534 | Wrb          | Wrb          | WRB            | 9.193584394 | 9.367827016 | 3.366011017 | 7.562649614 | 6.54025616  | 15.06176744 | 17.08483748 | 6.217420715 | 6.128355098 | 7.97379367  |
| ENSMUSG000000084790  | 1.021148005  | 1.735426775  | 2.376991195 | 0.123134504 | 0.999071534 | Gm15879      | Gm15879      |                | 1.543960738 | 1.067220799 | 2.625488593 | 4.301690606 | 1.308051232 | 0.582097292 | 1.617882337 | 3.868617334 | 7.85686551  | 5.163358196 |
| ENSMUSG000000093930  | 0.398453718  | 6.682706919  | 2.374470176 | 0.123333436 | 0.999071534 | Hmgcs1       | Hmgcs1       | HMGCS1         | 78.53145753 | 57.03702272 | 91.42085922 | 113.2315979 | 117.5284032 | 151.8546311 | 116.0992365 | 76.75060461 | 115.3387857 | 104.3129073 |
| ENSMUSG000000036104  | 0.334439374  | 6.559743203  | 2.372921867 | 0.123455788 | 0.999071534 | Rab3gap1     | Rab3gap1     | RAB3GAP1       | 97.69060669 | 90.89163808 | 64.08884977 | 95.3310144  | 84.10769421 | 112.5630639 | 110.1454295 | 93.8830528  | 89.48969816 | 100.4567284 |
| ENSMUSG000000030123  | -0.512932279 | 6.409944079  | 2.371316406 | 0.1235828   | 0.999071534 | Plknd1       | Plknd1       | PLXND1         | 118.5340767 | 153.2647648 | 97.27771839 | 67.23126125 | 84.76171983 | 169.826885  | 73.51657339 | 44.55818179 | 28.75612777 | 46.73165962 |
| ENSMUSG000000044287  | 1.624738582  | -0.623528748 | 2.371237393 | 0.123589054 | 0.999071534 | Nrn1l        | Nrn1l        | NRN1L          | 0           | 0.059290044 | 0.605881983 | 0.277528426 | 0.39241537  | 0.218286485 | 0.064715293 | 1.243484143 | 1.335667137 | 0.784307574 |
| ENSMUSG000000047227  | 1.019315573  | 0.782349929  | 2.370183694 | 0.123672498 | 0.999071534 | Gm527        | Gm527        | C14orf28       | 0.491260235 | 1.304380977 | 0.740522424 | 1.387642131 | 1.504258917 | 0.727621615 | 0.711868228 | 3.730452429 | 1.414235792 | 3.464025119 |
| ENSMUSG000000037999  | 0.783052622  | 1.6111320354 | 2.368017921 | 0.123844205 | 0.999071534 | Arap2        | Arap2        | ARAP2          | 3.298461576 | 2.134441599 | 1.413724627 | 2.150845303 | 2.223687094 | 2.473913492 | 2.200319978 | 2.694215643 | 5.892649132 | 3.790819941 |
| ENSMUSG000000068129  | -1.470468112 | 0.809944756  | 2.367734455 | 0.123866698 | 0.999071534 | Cst7         | Cst7         | CST7           | 6.947823321 | 4.150303108 | 0.740522424 | 0           | 0.654025616 | 1.018670261 | 1.29430587  | 0.828989429 | 0           | 1.111102397 |
| ENSMUSG000000021224  | 0.386373892  | 4.204933058  | 2.36733343  | 0.123898459 | 0.999071534 | Numb         | Numb         | NUMB           | 18.10644865 | 15.3561215  | 14.81044848 | 14.63962448 | 19.68617104 | 23.72046466 | 15.53167044 | 22.24454967 | 17.52081009 | 21.1763045  |
| ENSMUSG000000054364  | -0.32475302  | 6.517322878  | 2.366818268 | 0.12393943  | 0.999071534 | Rhob         | Rhob         | RHOB           | 100.8487082 | 106.4849198 | 114.2424139 | 106.6402978 | 99.15028338 | 99.17482615 | 68.66292638 | 91.87966168 | 56.1765884  | 80.32616738 |
| ENSMUSG000000034121  | 0.681569272  | 1.993195188  | 2.366674953 | 0.123950811 | 0.999071534 | Mks1         | Mks1         | MKS1           | 2.17558104  | 3.735272798 | 2.154247051 | 2.081463196 | 5.297607489 | 4.438491853 | 3.882917609 | 4.559441858 | 3.8498641   | 6.078383699 |
| ENSMUSG000000029720  | -0.604204156 | 3.476202282  | 2.365491717 | 0.124044822 | 0.999071534 | Gm20605      | Gm20605      | LRCH4          | 16.00104765 | 14.52606088 | 20.66730764 | 12.14186865 | 5.363010051 | 17.0263458  | 4.853647011 | 6.63191543  | 7.385453579 | 7.581639883 |
| ENSMUSG000000034634  | 1.129943649  | 0.808325599  | 2.365072815 | 0.124078124 | 0.999071534 | Ly6d         | Ly6d         | LY6D           | 2.38612114  | 0.830060622 | 0.538561763 | 0.138764213 | 1.438856355 | 6.766881022 | 1.68259763  | 0.552659619 | 0.864255206 | 1.895409971 |
| ENSMUSG000000006024  | -0.328611826 | 6.635682905  | 2.364925443 | 0.124089842 | 0.999071534 | Napa         | Napa         | NAPA           | 127.3767609 | 126.9399851 | 113.3672511 | 100.0489976 | 107.260201  | 118.5295611 | 83.61215918 | 86.76756021 | 52.95527354 | 92.22149892 |
| ENSMUSG000000085024  | 0.984986526  | 0.908408259  | 2.364606839 | 0.124115179 | 0.999071534 | C23003516Rik | C23003516Rik |                | 1.894860906 | 0.415030311 | 1.481044848 | 1.179495811 | 1.177246109 | 1.164194584 | 0.711868228 | 2.210638477 | 3.928432755 | 2.61435858  |
| ENSMUSG000000020921  | -0.395942338 | 4.258556436  | 2.363324027 | 0.124217255 | 0.999071534 | Tmem101      | Tmem101      | TMEM101        | 23.36995117 | 17.90559341 | 25.85096461 | 20.39833933 | 24.72216828 | 21.46483765 | 20.90303979 | 12.50392388 | 11.31388633 | 14.37897219 |
| ENSMUSG000000033685  | -0.406274409 | 7.924830884  | 2.363223568 | 0.124225253 | 0.999071534 | Ucp2         | Ucp2         | UCP2           | 301.9846843 | 312.5771141 | 272.5122519 | 254.0772742 | 298.7589014 | 318.7710296 | 189.6158099 | 235.8474925 | 104.0248993 | 193.266458  |
| ENSMUSG000000080731  | -1.290950536 | -0.45225942  | 2.36116918  | 0.124388931 | 0.999071534 | Rps2-ps9     | Rps2-ps9     |                | 1.333420637 | 0.711480533 | 1.413724627 | 0.346910533 | 0.588623054 | 0.582097292 | 0.258861174 | 0.345412262 | 0           | 0.522871716 |
| ENSMUSG000000026048  | 0.474617849  | 4.109613562  | 2.360935405 | 0.124407572 | 0.999071534 | Erc5         | Erc5         | BIVM-ERCC5     | 16.28176778 | 14.11103057 | 14.27188671 | 11.86434022 | 18.18191212 | 14.26138366 | 10.80745401 | 22.79720929 | 20.03500705 | 25.88214994 |
| ENSMUSG000000035131  | 1.032601571  | 1.2613433    | 2.360759053 | 0.124421635 | 0.999071534 | Brinp3       | Brinp3       | BRINP3         | 2.877381375 | 2.01586151  | 0.807842644 | 1.318260024 | 0.719428178 | 0.654859454 | 8.089411685 | 1.243484143 | 1.649941757 | 2.875794438 |
| ENSMUSG000000025264  | 0.370497478  | 4.98932083   | 2.36033077  | 0.124455798 | 0.999071534 | Tsr2         | Tsr2         | TSR2           | 24.91391191 | 20.98867572 | 37.56468295 | 31.63824059 | 27.59988099 | 46.34949689 | 39.34689844 | 24.73151796 | 31.42746204 | 31.63373882 |
| ENSMUSG000000041671  | 0.453344276  | 3.691954638  | 2.359424773 | 0.1245281   | 0.999071534 | Pyroxd1      | Pyroxd1      | PYROXD1        | 12.00078574 | 12.62877946 | 10.16535327 | 7.84017804  | 13.73453794 | 13.89757285 | 14.56094103 | 14.23098519 | 9.271101302 | 19.73840728 |
| ENSMUSG000000026458  | -0.686557827 | 3.027817     | 2.35877536  | 0.124579954 | 0.999071534 | Ppfia4       | Ppfia4       | PPFIA4         | 16.98356812 | 10.07930755 | 7.270583797 | 7.354503294 | 10.00659192 | 14.77071879 | 3.235764674 | 2.486968286 | 3.299883514 | 7.843075741 |
| ENSMUSG000000043183  | 0.516016449  | 3.326716943  | 2.357189281 | 0.124706701 | 0.999071534 | Simc1        | Simc1        | SIMC1          | 8.351423991 | 10.0200175  | 8.953589305 | 4.02416218  | 11.31464316 | 16.73529715 | 9.189571674 | 12.02034672 | 9.271101302 | 9.86920364  |
| ENSMUSG000000060594  | -0.86167287  | 2.725750469  | 2.356947189 | 0.124726059 | 0.999071534 | Layn         | Layn         | LAYN           | 11.22880537 | 14.2889007  | 1.88496617  | 9.366584384 | 6.605658721 | 6.621356699 | 10.67802342 | 1.519813953 | 2.199922343 | 1.960768935 |
| ENSMUSG000000041417  | -0.416688892 | 4.587513063  | 2.356486538 | 0.124762904 | 0.999071534 | Plk3r1       | Plk3r1       | PIK3R1         | 26.66841275 | 31.72017376 | 30.02481827 | 26.57334681 | 26.94585538 | 41.69271855 | 16.24353866 | 15.68171669 | 13.90665195 | 15.75151045 |
| ENSMUSG000000025436  | 0.480029297  | 3.87859679   | 2.355736415 | 0.124822927 | 0.999071534 | Xrcc6bp1     | Xrcc6bp1     | ATP23          | 15.08870721 | 7.351965506 | 17.09933597 | 11.10113705 | 12.62269439 | 16.51701067 | 21.48547744 | 10.56961522 | 14.6923385  | 18.43122799 |
| ENSMUSG000000056531  | 0.662510121  | 2.722188465  | 2.355446627 | 0.124846124 | 0.999071534 | Ccdc18       | Ccdc18       | CCDC18         | 5.403862583 | 2.490181865 | 7.80914556  | 2.358991623 | 8.175320199 | 9.09527019  | 6.471529348 | 5.595678644 | 9.113963991 | 7.581639883 |
| ENSMUSG000000038900  | 0.380313293  | 5.985292861  | 2.355443913 | 0.124846342 | 0.999071534 | Rpl12        | Rpl12        | RPL12          | 53.47718556 | 63.49963756 | 58.2319906  | 52.79978308 | 57.29264396 | 43.80282124 | 69.89251696 | 91.39608452 | 52.09101833 | 82.61373113 |
| ENSMUSG0000000017421 | 0.386628013  | 7.423114309  | 2.353900279 | 0.124969987 | 0.999071534 | Zfp207       | Zfp207       | ZNF207         | 130.5348624 | 123.5604525 | 180.0815894 | 156.0403576 | 180.5764726 | 172.0097498 | 187.3507746 | 193.3617843 | 177.4865919 | 195.9461756 |
| ENSMUSG000000002108  | -0.663812018 | 2.504898812  | 2.35208121  | 0.12511587  | 0.999071534 | Nr1h3        | Nr1h3        | NR1H3          | 9.965564763 | 7.174095373 | 7.539864678 | 6.175007483 | 4.447374189 | 6.912405345 | 6.536244641 | 2.072473572 | 1.728510412 | 4.313691657 |
| ENSMUSG0000000022178 | 0.349003574  | 5.385899556  | 2.351667553 | 0.12514907  | 0.999071534 | Ajuba        | Ajuba        | AJUBA          | 32.0020953  | 40.73226051 | 44.90258697 | 28.09975315 | 45.25857262 | 62.28441026 | 36.95243258 | 56.44036361 | 31.19175607 | 42.09117314 |
| ENSMUSG000000038535  | 0.437995231  | 4.371353832  | 2.351573914 | 0.125156587 | 0.999071534 | Zfp280d      | Zfp280d      | ZNF280D        | 16.21158775 | 15.94902195 | 17.03201575 | 19.98204669 | 21.32123508 | 17.0263458  | 18.8968657  | 31.36343339 | 25.3776756  | 18.2351511  |
| ENSMUSG000000021069  | -0.600555721 | 3.735938434  | 2.350319408 | 0.12525734  | 0.999071534 | Pygl         | Pygl         | PYGL           | 27.01931291 | 22.17447661 | 6.126140051 | 16.02726661 | 11.38004572 | 16.29872418 | 11.00159989 | 13.47107822 | 4.32127603  | 7.320204025 |
| ENSMUSG000000060244  | -0.704074488 | 1.483145359  | 2.350180169 | 0.125268529 | 0.999071534 | Alyref2      | Alyref2      | ALYREF         | 4.210802013 | 2.490181865 | 4.173853661 | 3.469105327 | 2.746907587 | 3.128772945 | 1.812028217 | 2.003391119 | 1.335667137 | 1.699333077 |
| ENSMUSG000000033526  | 0.488630631  | 3.378751125  | 2.349935084 | 0.125288225 | 0.999071534 | Ppip5k1      | Ppip5k1      | PPIP5K1        | 9.12340436  | 8.537766395 | 6.328100712 | 7.909560147 | 12.62269439 | 13.6065242  | 9.448432848 | 11.4676871  | 12.02100423 | 10.98030604 |
| ENSMUSG000000039069  | 0.503776642  | 3.427886013  | 2.349814801 | 0.125297892 | 0.999071534 | Mtg2         | Mtg2         | MTG2           | 10.10592483 | 9.54569715  | 8.213066882 | 5.203657991 | 12.9497072  | 9.968416129 | 13.33135046 | 12.57300634 | 11.07818037 | 12.41820326 |
| ENSMUSG000000089739  | -2.753715265 | 0.961138867  | 2.344688586 | 0.125710681 | 0.999071534 | Gm20431      | Gm20431      | TMEM189-UBE2V1 | 7.018003354 | 9.427117061 | 0           | 0           | 0           | 2.692199976 | 0           | 0           | 0           | 0           |

|                     |              |             |             |             |             |             |             |            |             |             |             |             |             |             |             |             |             |             |
|---------------------|--------------|-------------|-------------|-------------|-------------|-------------|-------------|------------|-------------|-------------|-------------|-------------|-------------|-------------|-------------|-------------|-------------|-------------|
| ENSMUSG00000029910  | 0.459316437  | 5.732014382 | 2.343554291 | 0.125802225 | 0.999071534 | Mad2l1      | Mad2l1      | MAD2L1     | 58.95122818 | 29.70431225 | 42.88298036 | 49.19191354 | 51.01399804 | 64.32175079 | 111.8927424 | 31.98517546 | 49.02684078 | 40.45719903 |
| ENSMUSG000000061669 | 0.581490767  | 2.95480484  | 2.339603687 | 0.126121637 | 0.999071534 | Gm6404      | Rp34-ps2    |            | 6.246022985 | 5.929004441 | 7.203263577 | 6.03624327  | 6.278645913 | 8.58593506  | 13.9137881  | 4.90485412  | 9.899650542 | 6.209101628 |
| ENSMUSG000000020707 | 0.516222532  | 3.022364245 | 2.339061659 | 0.126165531 | 0.999071534 | Rnf135      | Rnf135      | RNF135     | 8.070703857 | 7.885575906 | 6.933982695 | 4.926129565 | 6.474853598 | 13.31547556 | 9.319002261 | 6.908245239 | 5.971217787 | 10.98030604 |
| ENSMUSG000000097167 | -1.229112205 | 0.353942113 | 2.338750173 | 0.126190763 | 0.999071534 | Gm16740     | Gm16740     |            | 2.035220973 | 1.541541155 | 0.807842644 | 2.914048475 | 0.915635862 | 1.018670261 | 0.517722348 | 1.588896405 | 0.235705965 | 0           |
| ENSMUSG000000037772 | 1.651843532  | 0.947566371 | 2.338476628 | 0.126212927 | 0.999071534 | Mrpl23      | Mrpl23      | AC004556.1 | 0.350900168 | 0.711480533 | 1.88496617  | 0           | 1.569661478 | 0.436572969 | 11.13103048 | 0           | 0.707117896 | 0.915025503 |
| ENSMUSG000000092358 | 0.462964755  | 7.154960969 | 2.335982275 | 0.126415226 | 0.999071534 | Gm20430     | Gm20430     |            | 98.46258706 | 106.0698894 | 131.9476319 | 164.2968283 | 116.4165596 | 86.29592357 | 174.0841395 | 180.5124481 | 180.7864754 | 145.554414  |
| ENSMUSG000000045039 | -0.354202974 | 5.90622644  | 2.334793541 | 0.126511763 | 0.999071534 | Megf8       | Megf8       | MEGF8      | 70.25021358 | 99.25153434 | 60.92479941 | 56.75456316 | 62.3286412  | 75.09055069 | 35.78755729 | 47.52872725 | 37.32011117 | 62.67924696 |
| ENSMUSG000000049577 | -0.691854572 | 2.364664676 | 2.333669458 | 0.126603125 | 0.999071534 | Zfpn1       | Zfpn1       | ZFPN1      | 5.895122818 | 7.470545595 | 8.011106221 | 4.995511672 | 5.820827982 | 8.003837767 | 2.9769035   | 5.319348834 | 1.335667137 | 1.895409971 |
| ENSMUSG000000071748 | 0.348932617  | 5.112650957 | 2.329432883 | 0.12694812  | 0.999071534 | Gm14698     | Gm14698     | STYX       | 30.45813456 | 27.39200052 | 36.82416053 | 29.90368792 | 32.76668336 | 38.2001348  | 50.80150538 | 32.12334036 | 33.86309035 | 30.52263642 |
| ENSMUSG000000028041 | -0.345182509 | 6.81617204  | 2.326888449 | 0.127155822 | 0.999071534 | Adam15      | Adam15      | ADAM15     | 149.6940115 | 150.7152929 | 115.7234588 | 121.6268328 | 116.808975  | 152.5094906 | 82.18842272 | 92.01782659 | 66.3119449  | 97.84236986 |
| ENSMUSG000000097644 | -0.856929578 | 1.235152767 | 2.326631868 | 0.127176787 | 0.999071534 | Gm26862     | Gm26862     |            | 2.947561409 | 3.083082309 | 2.221567271 | 2.983430582 | 3.597140888 | 2.546675653 | 2.070889391 | 0.207247357 | 1.649941757 | 1.241820326 |
| ENSMUSG000000031790 | -0.650252663 | 2.696613687 | 2.32638449  | 0.127197005 | 0.999071534 | Mmp15       | Mmp15       | MMP15      | 7.93034379  | 12.74735955 | 8.616988204 | 5.61995063  | 5.428412612 | 10.4049891  | 4.788931717 | 2.210638477 | 2.749902928 | 4.967281302 |
| ENSMUSG000000070034 | -0.404826904 | 4.518998771 | 2.326332064 | 0.12720129  | 0.999071534 | Sp110       | Sp110       | SP110      | 26.66841275 | 20.57364541 | 29.68821717 | 31.7770048  | 25.57240158 | 29.90524839 | 13.20191987 | 14.64547991 | 15.71373102 | 23.00635551 |
| ENSMUSG000000031871 | -0.398873891 | 5.709119126 | 2.324895464 | 0.127318773 | 0.999071534 | Cdh5        | Cdh5        | CDH5       | 45.12576157 | 97.29496287 | 58.63591192 | 46.20848296 | 61.80542071 | 74.79950204 | 53.90783947 | 31.84701055 | 29.69895163 | 34.18273844 |
| ENSMUSG000000029598 | -0.354533185 | 6.150221661 | 2.323767736 | 0.127411082 | 0.999071534 | Plbd2       | Plbd2       | PLBD2      | 73.75921525 | 118.3429286 | 65.90649571 | 64.45597698 | 92.21761185 | 89.13364786 | 61.22066763 | 63.4176913  | 36.53442462 | 57.64660669 |
| ENSMUSG000000020275 | -0.512125059 | 3.370283796 | 2.323706302 | 0.127416113 | 0.999071534 | Rel         | Rel         | REL        | 13.12366627 | 14.76322106 | 14.06992605 | 9.089055958 | 11.44544828 | 16.37148634 | 6.147952881 | 8.35897674  | 5.106962581 | 6.339819557 |
| ENSMUSG000000051331 | -0.459879798 | 4.062108461 | 2.322344616 | 0.127527676 | 0.999071534 | Cacna1c     | Cacna1c     | CACNA1C    | 12.42186594 | 25.61329918 | 20.39802676 | 22.54918463 | 18.18191212 | 16.4442485  | 8.089411685 | 12.71117124 | 12.02100423 | 18.16979213 |
| ENSMUSG000000026740 | 0.379088121  | 5.383433991 | 2.320524394 | 0.127676977 | 0.999071534 | Dnajc1      | Dnajc1      | DNAJC1     | 31.30029496 | 37.53059811 | 43.75814322 | 36.14807751 | 38.84912159 | 37.32698886 | 30.93391028 | 48.08138687 | 50.20537061 | 54.96688915 |
| ENSMUSG000000097589 | 0.444889162  | 4.20227988  | 2.318706496 | 0.127826282 | 0.999071534 | Dleu2       | Dleu2       |            | 12.3516859  | 11.0872383  | 22.41673337 | 18.59440456 | 15.5004071  | 19.35473496 | 16.30825396 | 18.58317969 | 19.17075184 | 27.2546882  |
| ENSMUSG000000032009 | -0.361700889 | 6.398315828 | 2.318240343 | 0.127864599 | 0.999071534 | Sesn3       | Sesn3       | SESN3      | 74.67155569 | 98.36218367 | 95.05615112 | 125.026556  | 95.74935018 | 87.1690695  | 52.41938772 | 61.41430018 | 61.91210022 | 94.11690889 |
| ENSMUSG000000063531 | 0.585343836  | 2.828497636 | 2.316757253 | 0.12798659  | 0.999071534 | Sema3e      | Sema3e      | SEMA3E     | 6.596923153 | 5.276813952 | 7.001302916 | 2.914048475 | 7.39048946  | 11.56918368 | 6.212668174 | 9.326131073 | 8.249708785 | 5.163358196 |
| ENSMUSG000000026811 | -0.389513395 | 4.592792388 | 2.314348089 | 0.128185032 | 0.999071534 | St6galnac6  | St6galnac6  | ST6GALNAC6 | 33.75659613 | 36.28550718 | 23.831358   | 18.87193298 | 29.43115272 | 28.37724299 | 20.32060215 | 21.96821986 | 11.47102364 | 20.52271485 |
| ENSMUSG000000030032 | -0.524653698 | 3.03318661  | 2.314333979 | 0.128186195 | 0.999071534 | Wdr54       | Wdr54       | WDR54      | 12.07096577 | 8.715636528 | 10.97319592 | 6.938210655 | 10.85682522 | 6.330308052 | 7.895265804 | 6.977327692 | 3.35589479  | 7.385562989 |
| ENSMUSG000000030304 | 0.358435341  | 6.3428942   | 2.312928859 | 0.128302094 | 0.999071534 | Erglc2      | Erglc2      | ERGLC2     | 72.98723488 | 73.22320484 | 70.08034938 | 80.34447938 | 71.28879214 | 77.12789121 | 123.0884882 | 77.16509932 | 86.8693254  | 68.88834859 |
| ENSMUSG000000021597 | 0.495663929  | 3.610839277 | 2.312413952 | 0.128344594 | 0.999071534 | Ankrd32     | Slf1        | SLF1       | 13.40438641 | 10.61291795 | 8.684308424 | 8.880909638 | 10.66061754 | 20.95550252 | 21.16190097 | 9.395213526 | 9.978219197 | 8.431306421 |
| ENSMUSG000000017778 | 0.466838443  | 7.201088107 | 2.310972026 | 0.128463694 | 0.999071534 | Cox7c       | Cox7c       | COX7C      | 125.9029802 | 96.82064252 | 139.7567774 | 164.5743567 | 109.6800958 | 92.77175594 | 167.806756  | 158.6133107 | 210.9568389 | 158.364771  |
| ENSMUSG000000039960 | -0.334015999 | 6.05274378  | 2.310670514 | 0.128488613 | 0.999071534 | Rhou        | Rhou        | RHO        | 76.21551643 | 65.27833889 | 68.06074277 | 97.55124181 | 74.55892022 | 75.74541014 | 45.49485132 | 56.44036361 | 50.99105716 | 55.75119672 |
| ENSMUSG000000044030 | -0.387817018 | 4.965068708 | 2.309821987 | 0.128558772 | 0.999071534 | Irf2bp1     | Irf2bp1     | IRF2BP1    | 33.54605603 | 27.09555029 | 42.54637926 | 42.87814185 | 36.23301912 | 46.78606986 | 18.8321504  | 24.10977589 | 16.42048892 | 28.56186749 |
| ENSMUSG000000057667 | -0.462669034 | 3.427027735 | 2.309322517 | 0.12860009  | 0.999071534 | Bloc1s3     | Bloc1s3     | BLOC1S3    | 14.03600671 | 13.28096995 | 10.16535327 | 11.30928337 | 15.30419941 | 10.11394045 | 9.966155196 | 7.737234668 | 5.499805857 | 10.32671639 |
| ENSMUSG000000097328 | -0.420763124 | 4.010821798 | 2.308985077 | 0.128628012 | 0.999071534 | Tnfsf12     | Tnfsf12     | TNFSF12    | 21.47509026 | 19.80287483 | 18.37842015 | 17.20676242 | 18.24731469 | 16.73529715 | 8.348272859 | 17.20153065 | 10.37106247 | 13.72538255 |
| ENSMUSG000000070572 | -0.494332482 | 4.774658084 | 2.307583594 | 0.128744055 | 0.999071534 | Trmt112-ps2 | Trmt112-ps2 |            | 38.66919848 | 30.47508283 | 32.91958775 | 24.07559097 | 40.15717282 | 41.32890774 | 31.83992439 | 11.88218181 | 7.228316269 | 23.2024324  |
| ENSMUSG000000020079 | 0.357265813  | 4.73889515  | 2.306968054 | 0.128795058 | 0.999071534 | Supv3l1     | Supv3l1     | SUPV3L1    | 26.73859278 | 24.19033812 | 21.27318963 | 23.79806255 | 24.98377853 | 39.72814019 | 31.90463969 | 22.52087948 | 28.59899046 | 21.96061207 |
| ENSMUSG000000024829 | 0.348563903  | 5.312679045 | 2.306644011 | 0.128821917 | 0.999071534 | Mrpl21      | Mrpl21      | MRPL21     | 36.49361744 | 32.01662398 | 38.57448626 | 37.60510175 | 35.97140888 | 40.091951   | 63.03269585 | 35.78471034 | 36.29871866 | 37.97355838 |
| ENSMUSG000000034300 | -0.349368252 | 5.031860213 | 2.30258673  | 0.129158743 | 0.999071534 | Fam53c      | Fam53c      | FAM53C     | 37.68667801 | 46.18694459 | 38.23788515 | 31.36071216 | 36.49462937 | 48.16855093 | 25.69197151 | 26.18224946 | 17.04939816 | 26.01286787 |
| ENSMUSG000000001627 | 0.373323875  | 7.489869771 | 2.301373528 | 0.12925965  | 0.999071534 | Ifrd1       | Ifrd1       | IFRD1      | 178.3976453 | 210.1239174 | 148.1044848 | 137.7928636 | 139.7652741 | 209.2639765 | 222.8794707 | 201.9280083 | 166.4084115 | 176.2731273 |
| ENSMUSG000000029918 | 0.410061488  | 5.883275657 | 2.301263568 | 0.1292688   | 0.999071534 | Mrps33      | Mrps33      | MRPS33     | 48.49440318 | 43.34102246 | 52.17317076 | 69.65963498 | 47.15524691 | 39.80090235 | 84.51817328 | 57.20027058 | 72.20459403 | 60.71847803 |
| ENSMUSG000000084845 | 0.89940042   | 1.202495037 | 2.301060141 | 0.12928573  | 0.999071534 | Tmem240     | Tmem240     | TMEM240    | 2.105401006 | 1.007930755 | 3.029409915 | 0.624438959 | 1.177246109 | 2.110102684 | 1.100159989 | 2.210638477 | 3.928432755 | 3.856178906 |
| ENSMUSG000000040249 | -0.420215946 | 9.711159299 | 2.299400128 | 0.129423975 | 0.999071534 | Lrp1        | Lrp1        | LRP1       | 842.7218428 | 1419.581533 | 831.6066819 | 858.4648043 | 1038.39647  | 955.4399429 | 514.1630067 | 834.1706127 | 454.912513  | 762.8698337 |
| ENSMUSG000000070063 | 0.975118229  | 0.905083733 | 2.29727314  | 0.129601349 | 0.999071534 | Snora33     | Snora33     | SNORA33    | 0.631620302 | 0.652190488 | 2.086926831 | 1.665170557 | 1.046440986 | 0.9459081   | 1.359021163 | 1.174401691 | 3.614158135 | 3.529384083 |

|                     |              |              |             |             |             |               |               |         |  |             |             |             |             |             |             |             |             |             |             |
|---------------------|--------------|--------------|-------------|-------------|-------------|---------------|---------------|---------|--|-------------|-------------|-------------|-------------|-------------|-------------|-------------|-------------|-------------|-------------|
| ENSMUSG00000086473  | 0.897310389  | 0.79554756   | 2.29709772  | 0.12961599  | 0.999071534 | Gm16265       | Gm16265       |         |  | 0.912340436 | 1.126510844 | 1.077123255 | 1.526406344 | 1.177246109 | 1.164194584 | 2.523896446 | 1.934308667 | 3.142746204 | 0.915025503 |
| ENSMUSG00000054545  | -1.390547411 | 3.306684667  | 2.296965541 | 0.129627023 | 0.999071534 | Ugt1a6a       | Ugt1a6a       |         |  | 16.56248792 | 14.94109119 | 2.894769475 | 9.505348597 | 30.21598346 | 11.49642152 | 10.67802342 | 5.941090906 | 0           | 0           |
| ENSMUSG00000028643  | -0.363015928 | 5.419573659  | 2.295149145 | 0.129778744 | 0.999071534 | Ccdc23        | Svbp          | SVBP    |  | 67.02193203 | 35.21828638 | 54.79865936 | 51.82843359 | 39.96096514 | 34.70755105 | 37.79373139 | 31.29435093 | 36.22015    | 37.90819941 |
| ENSMUSG00000020925  | 0.362092076  | 4.734589424  | 2.294961616 | 0.129794419 | 0.999071534 | Ccdc43        | Ccdc43        | CCDC43  |  | 23.019051   | 27.62916069 | 21.94639183 | 18.73316877 | 29.49655528 | 36.3083186  | 36.82300199 | 25.14601267 | 24.82769501 | 21.63381725 |
| ENSMUSG00000021713  | 0.42096141   | 4.140553026  | 2.29420066  | 0.129858049 | 0.999071534 | Ppwd1         | Ppwd1         | PPWD1   |  | 14.87816711 | 17.13482283 | 12.92548231 | 15.54159187 | 17.2008737  | 18.84539983 | 16.11410808 | 18.8595095  | 24.43485174 | 16.07830527 |
| ENSMUSG00000032870  | -0.420573791 | 4.615095572  | 2.293257138 | 0.129936992 | 0.999071534 | Smap2         | Smap2         | SMAP2   |  | 29.40543405 | 40.49510033 | 28.27449254 | 15.40282765 | 32.37426799 | 34.99859969 | 16.95540689 | 21.27739534 | 13.8280833  | 16.60117698 |
| ENSMUSG00000045868  | -0.503983984 | 5.270839246  | 2.292920932 | 0.129965135 | 0.999071534 | Gvin1         | Gvin1         |         |  | 74.39083555 | 32.96526469 | 24.57188042 | 50.78770199 | 51.92963391 | 43.22072394 | 22.71506801 | 54.64421984 | 16.42084892 | 19.73840728 |
| ENSMUSG00000042873  | 0.966976288  | 1.104995593  | 2.292330409 | 0.130014582 | 0.999071534 | Lhfp14        | Lhfp14        | LHFP14  |  | 1.19306057  | 1.185800888 | 2.356207712 | 1.526406344 | 0.850233301 | 0.582097292 | 0.970729402 | 3.661369977 | 4.16413872  | 2.745076509 |
| ENSMUSG00000084113  | -1.699169919 | 0.551086694  | 2.29208882  | 0.130034817 | 0.999071534 | Gm14277       | Gm14277       |         |  | 5.75476275  | 1.185800888 | 1.615685288 | 1.80393477  | 0.196207685 | 0.582097292 | 2.523896446 | 0           | 0           | 0           |
| ENSMUSG00000031878  | 0.360752237  | 5.941822921  | 2.290417373 | 0.130174914 | 0.999071534 | Nae1          | Nae1          | NAE1    |  | 68.91679294 | 52.70884948 | 50.89408658 | 56.96270948 | 49.24812888 | 73.48978314 | 105.8095048 | 50.56835515 | 49.96966464 | 55.4244019  |
| ENSMUSG00000040274  | 0.402400401  | 5.877958203  | 2.290117361 | 0.130200078 | 0.999071534 | Cdk6          | Cdk6          | CDK6    |  | 43.16072063 | 47.31345544 | 64.56009131 | 52.59163676 | 54.28412612 | 73.99911827 | 35.26983495 | 47.32147989 | 76.21159544 | 85.03201282 |
| ENSMUSG00000075415  | -0.347044135 | 5.27824013   | 2.28964345  | 0.130239839 | 0.999071534 | Fnbp1         | Fnbp1         | FNBP1   |  | 47.23116257 | 53.59820014 | 43.690823   | 36.56437015 | 44.34293676 | 55.44476708 | 22.97392919 | 33.50498941 | 23.25632191 | 33.65986672 |
| ENSMUSG00000020151  | 1.93065395   | -0.972021619 | 2.288859842 | 0.130305613 | 0.999071534 | Ptpr          | Ptpr          | PTPR    |  | 0.210540101 | 0           | 0.403921322 | 0.20814632  | 0           | 0.145524323 | 0           | 0.207247357 | 1.099961171 | 1.372538255 |
| ENSMUSG00000035842  | 0.462969113  | 3.708379006  | 2.287364642 | 0.13043122  | 0.999071534 | Ddx11         | Ddx11         | DDX11   |  | 11.57970553 | 7.292675462 | 11.30979702 | 13.39074656 | 12.75349951 | 21.90141062 | 10.16030108 | 12.36575898 | 14.77090716 | 13.72538255 |
| ENSMUSG00000029723  | -0.32085562  | 5.945724408  | 2.28722345  | 0.130443088 | 0.999071534 | Tsc22d4       | Tsc22d4       | TSC22D4 |  | 68.98697297 | 82.70961195 | 66.44505748 | 58.41973371 | 79.13709953 | 61.77507513 | 44.78298309 | 60.30898094 | 36.29871866 | 63.13675971 |
| ENSMUSG00000042700  | -0.371035771 | 5.131947789  | 2.286909999 | 0.13046944  | 0.999071534 | Sipa1l1       | Sipa1l1       | SIPA1L1 |  | 36.07253724 | 46.42410477 | 39.92089066 | 33.71970378 | 48.92111607 | 37.90908615 | 17.27898336 | 38.61709089 | 25.3776756  | 28.30043163 |
| ENSMUSG00000074364  | -0.379022388 | 7.09372106   | 2.286561191 | 0.130498771 | 0.999071534 | Ehd2          | Ehd2          | EHD2    |  | 156.0102146 | 164.233423  | 150.3933722 | 148.8940007 | 182.4731469 | 207.3721603 | 108.7864083 | 105.7652346 | 61.5978256  | 113.2017265 |
| ENSMUSG00000028468  | -0.395354297 | 4.594108534  | 2.286508007 | 0.130503244 | 0.999071534 | Rgp1          | Rgp1          | RGP1    |  | 31.72137516 | 35.98905696 | 25.24508263 | 24.42250151 | 24.59136316 | 30.19629703 | 15.14337867 | 22.45179703 | 10.99961171 | 24.1174579  |
| ENSMUSG00000089645  | 1.247292299  | -0.162622377 | 2.285945266 | 0.130550582 | 0.999071534 | Gm5766        | Gm5766        |         |  | 0.140360067 | 0.5336104   | 1.009803305 | 0.416292639 | 0.261610246 | 0.363810808 | 0.517722348 | 0.621742072 | 1.885647722 | 1.568615148 |
| ENSMUSG00000041695  | -0.60986017  | 3.514467497  | 2.285531017 | 0.130585441 | 0.999071534 | Kcnj2         | Kcnj2         | KCNJ2   |  | 13.89564664 | 16.4233423  | 17.36861685 | 8.880909638 | 14.58477124 | 6.69411886  | 16.04939278 | 11.26043974 | 5.892649132 | 3.006512367 |
| ENSMUSG00000034850  | -0.317692036 | 5.815775766  | 2.285293387 | 0.130605443 | 0.999071534 | Tmem127       | Tmem127       | TMEM127 |  | 70.67129378 | 73.10462475 | 52.84637297 | 63.69277381 | 63.63669243 | 74.21740475 | 49.31305363 | 46.42340801 | 29.30610835 | 48.95386441 |
| ENSMUSG00000085088  | 1.256988877  | 0.505365311  | 2.285071477 | 0.130624124 | 0.999071534 | 4931413K12Rik | 4931413K12Rik |         |  | 0.491260235 | 0.652190488 | 1.481044848 | 0.346910533 | 1.046440986 | 0.436572969 | 0.064715293 | 1.312566595 | 3.299883514 | 3.137230296 |
| ENSMUSG00000084957  | 0.471751384  | 5.020038818  | 2.283848478 | 0.130727134 | 0.999071534 | Bbip1         | Bbip1         |         |  | 36.42343741 | 21.16654585 | 28.27449254 | 31.70762269 | 22.62928631 | 15.28005392 | 43.03567016 | 35.16296827 | 40.777132   | 39.93432731 |
| ENSMUSG00000023013  | -1.544463511 | 0.176871606  | 2.283830925 | 0.130728613 | 0.999071534 | Aqp2          | Aqp2          | AQP2    |  | 0.210540101 | 0.830060622 | 3.433331237 | 2.150845303 | 0.915635862 | 1.819054038 | 0.776583522 | 0.138164905 | 0           | 0           |
| ENSMUSG00000031639  | -0.442530621 | 3.969436986  | 2.281502611 | 0.130924975 | 0.999071534 | Tlr3          | Tlr3          | TLR3    |  | 14.66762701 | 15.11896132 | 19.25358302 | 25.53261521 | 17.59328907 | 18.77263767 | 10.09558578 | 10.43145031 | 12.72812213 | 11.9606905  |
| ENSMUSG00000034620  | 0.315987508  | 5.885755378  | 2.279828054 | 0.131066404 | 0.999071534 | Tmem5         | Tmem5         | TMEM5   |  | 55.2316864  | 54.01323045 | 53.31761451 | 48.63685669 | 62.13243352 | 53.26190223 | 70.02194754 | 65.76649468 | 55.23376453 | 67.90796412 |
| ENSMUSG00000029245  | 1.2583622    | 1.486383216  | 2.278466334 | 0.131181537 | 0.999071534 | Epha5         | Epha5         | EPHA5   |  | 0.842160403 | 0.770770577 | 3.029409915 | 2.844666369 | 0.654025616 | 0.654859454 | 0.129430587 | 1.381649048 | 8.956826681 | 5.359435089 |
| ENSMUSG00000035112  | 1.372926796  | 0.184329502  | 2.273864472 | 0.13157146  | 0.999071534 | Wnk4          | Wnk4          | WNK4    |  | 0.210540101 | 0.415030311 | 0.134640441 | 0.832585279 | 1.373453794 | 1.382481069 | 0.258861174 | 0.138164905 | 3.535589479 | 1.372538255 |
| ENSMUSG00000014771  | 0.34460027   | 5.382965003  | 2.273482821 | 0.131603856 | 0.999071534 | Pdc2          | Pdc2          | PDC2    |  | 34.38821644 | 31.66088371 | 43.21958146 | 43.64134502 | 36.62543449 | 37.54527535 | 48.98947716 | 42.90020294 | 38.81291562 | 53.98650468 |
| ENSMUSG00000049354  | -0.357413004 | 6.27059519   | 2.273167742 | 0.131630608 | 0.999071534 | Dcaf7         | Dcaf7         | DCAF7   |  | 99.02402733 | 102.6310669 | 75.86988833 | 82.35656047 | 90.32093756 | 125.4419665 | 53.45483241 | 50.22294289 | 44.23415282 | 65.81647726 |
| ENSMUSG00000026548  | -0.560448406 | 3.686787034  | 2.270587564 | 0.131849906 | 0.999071534 | Slamf9        | Slamf9        | SLAMF9  |  | 27.15967298 | 10.67220799 | 15.2143698  | 14.15394974 | 11.83786365 | 21.173789   | 12.36062105 | 5.388431287 | 6.835472994 | 6.339819557 |
| ENSMUSG00000032322  | 0.352412159  | 5.213822201  | 2.270383515 | 0.131867266 | 0.999071534 | Pstpip1       | Pstpip1       | PSTPIP1 |  | 46.2486421  | 31.06798327 | 30.89998114 | 25.4632331  | 35.77520119 | 33.83440511 | 39.34689844 | 43.79827482 | 37.47724848 | 42.74476279 |
| ENSMUSG00000026814  | -0.390936285 | 4.82270576   | 2.267395076 | 0.132121812 | 0.999071534 | Eng           | Eng           | ENG     |  | 33.61623607 | 44.17108308 | 29.75553739 | 23.79806255 | 35.38278582 | 43.07519962 | 26.27440915 | 21.07014798 | 14.29949523 | 17.51620249 |
| ENSMUSG000000097124 | -1.048738699 | 0.518929185  | 2.266478724 | 0.132199973 | 0.999071534 | A530020G20Rik | A530020G20Rik |         |  | 2.456301174 | 0.592900444 | 3.769932339 | 1.040731598 | 1.24264867  | 1.018670261 | 0.19414588  | 1.243484143 | 0.471411931 | 1.176461361 |
| ENSMUSG00000001156  | -0.475814017 | 4.38217329   | 2.264733392 | 0.132348987 | 0.999071534 | Mxd1          | Mxd1          | MXD1    |  | 33.40569597 | 40.67297046 | 19.72482456 | 12.97445392 | 19.35915823 | 17.09910796 | 14.36679515 | 24.10977589 | 10.44963113 | 17.97371524 |
| ENSMUSG000000063245 | 0.672181211  | 3.172332334  | 2.264337125 | 0.132382846 | 0.999071534 | Gm13248       | Gm13248       |         |  | 6.175842952 | 5.039653775 | 11.44443746 | 8.256470679 | 4.447374189 | 6.839643183 | 4.983077598 | 9.947873145 | 17.91365336 | 9.999921569 |
| ENSMUSG00000021133  | -0.347094872 | 5.87943561   | 2.261770903 | 0.132602349 | 0.999071534 | 4933426M11Rik | Susd6         | SUSD6   |  | 70.18003354 | 96.82064252 | 59.84767588 | 51.13461253 | 64.81393854 | 70.28824803 | 48.47175482 | 63.00319658 | 30.56320683 | 42.41796796 |
| ENSMUSG00000020413  | 0.430501936  | 3.727708178  | 2.260917481 | 0.132675437 | 0.999071534 | Hus1          | Hus1          | HUS1    |  | 12.70258607 | 10.79078808 | 10.16535327 | 13.52951078 | 10.66061754 | 22.1196971  | 14.69037162 | 13.95465538 | 12.64955347 | 10.32671639 |
| ENSMUSG00000044937  | 0.904901719  | 1.435577552  | 2.260801295 | 0.132685391 | 0.999071534 | BC030307      | Ttc41         |         |  | 1.894860906 | 1.304380977 | 0.673202203 | 2.914048475 | 2.485297341 | 1.018670261 | 1.876743511 | 2.556050739 | 3.457020824 | 6.731973344 |

|                     |              |              |             |             |             |               |               |             |             |             |             |             |             |             |             |             |             |
|---------------------|--------------|--------------|-------------|-------------|-------------|---------------|---------------|-------------|-------------|-------------|-------------|-------------|-------------|-------------|-------------|-------------|-------------|
| ENSMUSG00000064350  | 0.880595672  | 3.368196265  | 2.259914344 | 0.132761404 | 0.999071534 | mt-Ty         | mt-Ty         | 6.105662918 | 2.905212176 | 15.48365068 | 9.158438064 | 3.335530641 | 8.804221544 | 4.594785837 | 7.391822406 | 31.663168   | 5.490153018 |
| ENSMUSG00000098234  | 0.430787103  | 4.917517088  | 2.259630744 | 0.132785719 | 0.999071534 | Snhg6         | Snhg6         | 34.3180364  | 21.10725581 | 32.85226753 | 25.60199732 | 19.03214542 | 19.79130793 | 30.61033382 | 35.57746298 | 36.22015    | 39.28073767 |
| ENSMUSG00000062510  | 0.538766291  | 3.354174662  | 2.258431639 | 0.132888583 | 0.999071534 | Nsl1          | Nsl1          | NSL1        | 9.684844629 | 7.055515284 | 9.155549966 | 6.313771696 | 10.7260201  | 19.42749713 | 16.24353866 | 5.043019025 | 9.585375922 |
| ENSMUSG00000031833  | -0.369757243 | 4.587963668  | 2.256584469 | 0.133047215 | 0.999071534 | Mast3         | Mast3         | MAST3       | 26.24733254 | 28.28135118 | 27.803251   | 28.16913526 | 29.43115272 | 32.30639972 | 17.66727512 | 23.34986891 | 11.78529826 |
| ENSMUSG00000037475  | 0.56644649   | 7.519371415  | 2.25647656  | 0.133056489 | 0.999071534 | Thoc2         | Thoc2         | THOC2       | 88.56720233 | 106.9592401 | 206.8750371 | 189.3437688 | 170.5698806 | 117.2198422 | 100.3734202 | 253.5326003 | 288.5826702 |
| ENSMUSG00000045886  | 0.436571046  | 4.244197767  | 2.254300269 | 0.133243671 | 0.999071534 | Gm9803        | Gm9803        | PAM16       | 13.47456644 | 22.23376665 | 15.95489222 | 16.65170557 | 14.58477124 | 14.26138366 | 28.92773619 | 19.89574629 | 15.00661312 |
| ENSMUSG00000020903  | -0.322062879 | 5.69779146   | 2.254211263 | 0.133251333 | 0.999071534 | Stx8          | Stx8          | STX8        | 78.81217767 | 55.49548157 | 54.52937848 | 57.30962001 | 52.77986721 | 52.53428062 | 54.74913828 | 36.54461732 | 30.7989128  |
| ENSMUSG00000028252  | 0.365347433  | 4.933944675  | 2.253884331 | 0.13327948  | 0.999071534 | Ccnc          | Ccnc          | CCNC        | 29.96687432 | 26.20619963 | 25.64900395 | 29.34863107 | 26.74964769 | 31.50601594 | 48.21289364 | 23.90252853 | 31.34889338 |
| ENSMUSG00000069135  | 0.38680275   | 4.842787913  | 2.253675237 | 0.133297485 | 0.999071534 | Fgfr1op       | Fgfr1op       | FGFR1OP     | 23.019051   | 21.81873634 | 29.89017783 | 32.05453323 | 20.92881971 | 29.54143758 | 33.7813832  | 33.2286596  | 34.0202766  |
| ENSMUSG00000009927  | 0.46001208   | 8.32696423   | 2.25306592  | 0.133349968 | 0.999071534 | Rps25         | Rps25         | RPS25       | 297.7738823 | 233.662065  | 275.878263  | 323.8062913 | 267.3656718 | 203.7340523 | 485.6882776 | 390.7994332 | 351.5947316 |
| ENSMUSG00000049411  | -0.75032284  | 1.911560604  | 2.248950755 | 0.133705034 | 0.999071534 | Tmem241       | Tmem241       | TMEM241     | 7.579443623 | 4.446753331 | 3.231370576 | 3.399723221 | 5.101399804 | 5.311637791 | 4.27120937  | 1.105319238 | 1.099961171 |
| ENSMUSG00000032194  | -0.364684194 | 5.311299535  | 2.248030955 | 0.133784541 | 0.999071534 | Kank2         | Kank2         | KANK2       | 35.30055687 | 52.4716893  | 46.38363182 | 50.71831989 | 45.71639056 | 50.64246442 | 22.7797833  | 43.86735727 | 25.29910694 |
| ENSMUSG00000034616  | -0.423226278 | 4.373064451  | 2.248025685 | 0.133784997 | 0.999071534 | Ssh3          | Ssh3          | SSH3        | 27.30003305 | 31.72017376 | 22.08103227 | 14.43147816 | 27.79608868 | 18.04501606 | 13.71964222 | 24.10977589 | 9.978219197 |
| ENSMUSG00000046402  | -0.436870308 | 8.126632895  | 2.247428008 | 0.133836688 | 0.999071534 | Rbp1          | Rbp1          | RBP1        | 481.9964704 | 318.4468285 | 266.3187917 | 353.571215  | 246.6984623 | 306.6197487 | 318.0756675 | 183.4139111 | 125.6312795 |
| ENSMUSG00000028977  | 1.221738113  | -0.337727519 | 2.246292059 | 0.133934994 | 0.999071534 | Cas1          | Cas1          | CAS1        | 0.98252047  | 0.355740266 | 0.201960661 | 0.20814632  | 0.327012808 | 1.8918162   | 0.388291761 | 0.27632981  | 1.021392516 |
| ENSMUSG00000027357  | 0.381238547  | 5.112145763  | 2.24490656  | 0.134055006 | 0.999071534 | Crls1         | Crls1         | CRLS1       | 37.68667801 | 24.30891821 | 32.98690797 | 29.83430582 | 30.60839883 | 28.52276732 | 55.91401357 | 32.12334036 | 35.12018883 |
| ENSMUSG00000042323  | 0.533637703  | 7.522487285  | 2.244558254 | 0.134085195 | 0.999071534 | Pbrm1         | Pbrm1         | PBRM1       | 101.3399684 | 109.6865822 | 200.8162173 | 210.0890186 | 150.818307  | 154.4013068 | 108.5922625 | 207.7309343 | 314.2746204 |
| ENSMUSG00000026014  | 0.520446483  | 5.767149275  | 2.244275851 | 0.134109678 | 0.999071534 | Raph1         | Raph1         | RAPH1       | 27.01931291 | 45.59404415 | 47.46075534 | 51.68966938 | 59.32012337 | 39.43709155 | 28.7335903  | 98.51157711 | 82.65422516 |
| ENSMUSG00000016256  | -0.375257374 | 8.016151181  | 2.24092586  | 0.134400484 | 0.999071534 | Ctsz          | Ctsz          | CTSZ        | 306.7569266 | 324.375833  | 284.6972118 | 291.6129938 | 310.2043496 | 291.4852191 | 225.5327978 | 244.1373868 | 130.2668302 |
| ENSMUSG00000074280  | 0.435822148  | 6.015489886  | 2.23989245  | 0.134490334 | 0.999071534 | Gm6166        | Gm6166        |             | 27.08949295 | 63.91466787 | 61.39604095 | 59.94614006 | 71.94281776 | 45.33082663 | 78.04664394 | 95.1956194  | 55.07662722 |
| ENSMUSG00000046807  | -0.37437861  | 4.258921532  | 2.239725528 | 0.134504854 | 0.999071534 | Fam211b       | Lrrc75b       | LRRC75B     | 19.51004932 | 25.19826887 | 22.14835249 | 17.41490874 | 27.53447843 | 19.50025929 | 14.04321869 | 16.44162367 | 12.02100423 |
| ENSMUSG00000040302  | 0.560418898  | 2.738216416  | 2.239282232 | 0.134543422 | 0.999071534 | Rbm48         | Rbm48         | RBM48       | 4.982782381 | 4.921073686 | 4.510454763 | 7.146356975 | 5.75542542  | 6.621356699 | 5.177223478 | 8.566224097 | 7.778296855 |
| ENSMUSG00000026117  | -1.422203817 | 0.274301525  | 2.23711314  | 0.134732317 | 0.999071534 | Zap70         | Zap70         | ZAP70       | 3.859901845 | 1.956571465 | 1.077123525 | 0           | 1.308051232 | 0.873145938 | 0.453007054 | 0.27632981  | 0           |
| ENSMUSG00000057818  | 0.982289452  | 1.083450682  | 2.237056    | 0.134737297 | 0.999071534 | 1600029O15Rik | 1600029O15Rik |             | 3.158101509 | 0.770770577 | 0.605881983 | 1.734552664 | 0.719428178 | 2.692199976 | 1.229590576 | 0.759906976 | 4.478413341 |
| ENSMUSG00000020823  | -0.368407593 | 6.658359736  | 2.23624751  | 0.134807783 | 0.999071534 | Sec14l1       | Sec14l1       | SEC14L1     | 127.4469409 | 163.1069122 | 81.86138794 | 90.68241326 | 130.085695  | 139.7033501 | 89.50125088 | 82.41536571 | 52.71956757 |
| ENSMUSG00000021377  | 0.39931224   | 7.314429543  | 2.235680295 | 0.134857258 | 0.999071534 | Dek           | Dek           | DEK         | 121.9728983 | 98.71792394 | 152.3456586 | 158.885024  | 178.5489932 | 229.8556682 | 189.7452405 | 125.3155686 | 184.3220649 |
| ENSMUSG00000024661  | -0.401659398 | 11.86623246  | 2.235511717 | 0.134871967 | 0.999071534 | Fth1          | Fth1          |             | 5086.017211 | 4685.692209 | 3893.868865 | 4553.755799 | 3824.087777 | 2675.974014 | 2813.69153  | 3679.607744 | 2421.878793 |
| ENSMUSG00000028035  | -0.314591819 | 5.559574908  | 2.233687653 | 0.135031229 | 0.999071534 | Dnajb4        | Dnajb4        | DNAIB4      | 47.16098254 | 67.88710085 | 49.00912041 | 55.22815681 | 51.01399804 | 49.84208064 | 39.28218314 | 44.62726425 | 35.67016941 |
| ENSMUSG00000039239  | -0.807307057 | 1.713105947  | 2.232807575 | 0.135108145 | 0.999071534 | Tgfb2         | Tgfb2         | TGFB2       | 1.684320805 | 5.217523908 | 8.011106221 | 3.746633754 | 1.962076848 | 4.656778337 | 2.394465859 | 1.381649048 | 1.178529826 |
| ENSMUSG00000052336  | -0.424563378 | 6.239915888  | 2.23234632  | 0.1351495   | 0.999071534 | Cx3cr1        | Cx3cr1        | CX3CR1      | 62.10932968 | 72.45243427 | 107.3084312 | 99.07764815 | 106.5407728 | 124.350534  | 49.76606069 | 32.67599998 | 47.14119306 |
| ENSMUSG000000081321 | 1.076459562  | 0.736749513  | 2.229755514 | 0.135375267 | 0.999071534 | Gm15304       | Gm15304       |             | 0.771980369 | 0.948640711 | 1.95228639  | 1.110113705 | 0.39241537  | 1.018670261 | 0.582437641 | 1.588896405 | 4.949825271 |
| ENSMUSG00000053460  | -0.412238164 | 4.167623874  | 2.229709008 | 0.135379342 | 0.999071534 | Ggcx          | Ggcx          | GGCX        | 21.26455016 | 27.56987065 | 18.64770103 | 19.70451826 | 18.63973005 | 22.62903223 | 16.8259763  | 16.64887103 | 7.228316269 |
| ENSMUSG00000029561  | -0.438023344 | 5.016664549  | 2.228618528 | 0.135474929 | 0.999071534 | Oas2          | Oas2          |             | 33.33551593 | 49.92221739 | 37.43004251 | 30.04245214 | 42.44626248 | 38.2001348  | 11.97232929 | 41.51855389 | 16.49941757 |
| ENSMUSG00000090084  | 1.482335845  | 0.573675439  | 2.226405641 | 0.135669135 | 0.999071534 | SrpX          | SrpX          | SRPX        | 2.596661241 | 0           | 0.336601102 | 0.346910533 | 0.457817931 | 3.056010784 | 5.953807    | 0.27632981  | 0.628549241 |
| ENSMUSG00000053040  | -0.746164059 | 2.12066965   | 2.225061948 | 0.135787211 | 0.999071534 | Aph1c         | Aph1c         | APH1B       | 7.649623656 | 4.861783641 | 6.664701814 | 4.232308499 | 4.054958819 | 4.001918884 | 4.335924663 | 5.250266382 | 0.942823861 |
| ENSMUSG00000007891  | -0.453010507 | 9.662409586  | 2.223968135 | 0.135883414 | 0.999071534 | Ctsd          | Ctsd          |             | 1197.622272 | 1165.405113 | 638.868891  | 980.7160761 | 882.3459585 | 901.9597542 | 1065.537307 | 562.0548327 | 334.3881961 |
| ENSMUSG00000017723  | 0.499325234  | 4.417071553  | 2.22591648  | 0.136004587 | 0.999071534 | Wfdc2         | Wfdc2         | WDFC2       | 17.68536845 | 10.13859759 | 25.37972307 | 22.68794884 | 14.84638148 | 15.86215121 | 25.69197151 | 32.88324734 | 26.55620542 |
| ENSMUSG00000082935  | 0.367952951  | 4.884027796  | 2.221805121 | 0.136073879 | 0.999071534 | Gm7658        | Gm7658        |             | 33.19515587 | 22.64879696 | 24.23527932 | 25.94890785 | 27.33827075 | 23.50217817 | 41.22364195 | 31.43251584 | 28.12757853 |
| ENSMUSG00000022704  | 0.431440138  | 3.870163973  | 2.221725308 | 0.136080913 | 0.999071534 | Qtrtd1        | Qtrtd1        | QTRT2       | 15.29924731 | 13.69600026 | 14.74312825 | 7.63203172  | 13.08051232 | 23.50217817 | 18.63800452 | 11.39860464 | 13.43524002 |

|                    |              |              |             |             |             |            |            |           |             |             |             |             |             |             |             |             |             |             |
|--------------------|--------------|--------------|-------------|-------------|-------------|------------|------------|-----------|-------------|-------------|-------------|-------------|-------------|-------------|-------------|-------------|-------------|-------------|
| ENSMUSG00000020592 | -0.437901926 | 7.944132899  | 2.220586201 | 0.136181344 | 0.999071534 | Sdc1       | Sdc1       | SDC1      | 334.68858   | 426.3547093 | 275.878263  | 211.4072787 | 227.8625246 | 264.7087436 | 286.6240348 | 219.4058688 | 111.4889216 | 149.5413108 |
| ENSMUSG00000048379 | 0.321068321  | 5.749776291  | 2.220419362 | 0.136196061 | 0.999071534 | Soc4       | Soc4       | SOCS4     | 56.84582717 | 39.96148993 | 51.56728878 | 43.15567027 | 56.76942347 | 63.52136701 | 49.89549127 | 60.17081604 | 61.20498232 | 49.67281302 |
| ENSMUSG00000049957 | 0.458137831  | 3.905677427  | 2.218085627 | 0.136402102 | 0.999071534 | Ccdc137    | Ccdc137    | CCDC137   | 14.17636678 | 13.57742017 | 10.56927459 | 11.17051915 | 15.69661478 | 23.35665385 | 24.00937388 | 8.773471454 | 15.16375043 | 12.67963911 |
| ENSMUSG00000033863 | 0.732018203  | 4.41223516   | 2.216762101 | 0.136519108 | 0.999071534 | Klf9       | Klf9       | KLF9      | 9.474034528 | 19.98074497 | 23.56207712 | 13.04383603 | 16.54684808 | 8.949745867 | 6.600959935 | 67.28630863 | 18.22792798 | 22.09133    |
| ENSMUSG00000083344 | -0.98133583  | 1.246039768  | 2.216685779 | 0.136525859 | 0.999071534 | Gm7363     | Gm7363     |           | 5.474042616 | 3.083082309 | 4.443134543 | 2.150845303 | 0.261610246 | 1.964578361 | 2.718042326 | 1.4507315   | 0.471411931 | 0.849666539 |
| ENSMUSG00000045374 | -0.374811218 | 4.882714333  | 2.215094662 | 0.136666679 | 0.999071534 | Wdr81      | Wdr81      | WDR81     | 36.91469764 | 44.11179304 | 30.15945871 | 24.21435519 | 37.67187548 | 35.87174563 | 16.56711513 | 28.11655812 | 15.71373102 | 29.80368781 |
| ENSMUSG00000040181 | 0.749777054  | 4.920176482  | 2.214416387 | 0.136726758 | 0.999071534 | Fmo1       | Fmo1       | FMO1      | 13.19384631 | 12.45090933 | 35.20847524 | 38.43768703 | 15.69661478 | 11.64194584 | 9.901439902 | 31.98517546 | 67.41190607 | 46.99309548 |
| ENSMUSG00000032353 | -0.340767343 | 6.826119153  | 2.213873102 | 0.136774902 | 0.999071534 | Tmed3      | Tmed3      | TMED3     | 151.6590525 | 132.9282796 | 119.762672  | 152.363106  | 98.56166033 | 122.3859557 | 112.3457495 | 84.69508663 | 70.31894631 | 99.14954915 |
| ENSMUSG00000030682 | -0.352514619 | 6.116782855  | 2.211935628 | 0.136946748 | 0.999071534 | Cdipt      | Cdipt      | CDIPT     | 88.14612213 | 85.79269426 | 72.90779863 | 73.75317926 | 83.38826603 | 103.9043667 | 71.51039929 | 41.44947144 | 33.0774038  | 55.75119672 |
| ENSMUSG00000035493 | -0.397064232 | 9.013871425  | 2.211870078 | 0.136952566 | 0.999071534 | Tgfb1      | Tgfb1      | TGFB1     | 723.0648856 | 636.1821765 | 458.9892623 | 581.5608171 | 655.7260826 | 710.0131721 | 448.1534073 | 340.0929131 | 261.2407782 | 466.7283655 |
| ENSMUSG00000030114 | -1.080598699 | 1.708217726  | 2.21105857  | 0.137024618 | 0.999071534 | Klrg1      | Klrg1      | KLRG1     | 9.614664595 | 8.537766395 | 3.029409915 | 0.346910533 | 0.850233301 | 2.110102684 | 1.876743511 | 2.832380548 | 2.278490998 | 0.392153787 |
| ENSMUSG00000028524 | 0.632812219  | 5.329622152  | 2.210307515 | 0.137091341 | 0.999071534 | Sgip1      | Sgip1      | SGIP1     | 28.42291358 | 15.23754141 | 40.25749176 | 53.0079294  | 24.13354523 | 19.79130793 | 18.76743511 | 50.91376741 | 76.68300738 | 53.398274   |
| ENSMUSG00000024045 | 0.353512383  | 6.003556675  | 2.210179988 | 0.137102674 | 0.999071534 | Akap8      | Akap8      | AKAP8     | 48.42422314 | 43.81534282 | 75.1293659  | 63.76215592 | 59.71253874 | 92.69899378 | 46.85387248 | 64.38484563 | 62.85492408 | 81.7640646  |
| ENSMUSG00000041453 | 0.480548106  | 9.141403342  | 2.210065457 | 0.137112853 | 0.999071534 | Rpl21      | Rpl21      | RPL21     | 380.3757818 | 400.9785703 | 587.0323214 | 571.4310295 | 496.0784297 | 331.1405971 | 545.2263476 | 690.3409468 | 778.6939407 | 694.6350748 |
| ENSMUSG00000024795 | 0.46940789   | 4.42907333   | 2.210044799 | 0.137114689 | 0.999071534 | Klf20b     | Klf20b     | KIF20B    | 16.14140771 | 11.32439848 | 20.73462787 | 19.56575405 | 25.3761939  | 31.65154026 | 27.95700678 | 11.53676955 | 29.62038297 | 18.36586903 |
| ENSMUSG00000062939 | -0.934029087 | 1.117972814  | 2.208324635 | 0.137267673 | 0.999071534 | Stat4      | Stat4      | STAT4     | 2.666841275 | 3.260952442 | 2.827449254 | 2.428373729 | 2.681505025 | 1.236956746 | 0.064715293 | 1.105319238 | 1.571373102 | 2.61435858  |
| ENSMUSG00000029163 | -0.381128605 | 6.5961319    | 2.208213208 | 0.137277759 | 0.999071534 | Emil1n1    | Emil1n1    | EMILIN1   | 114.5338147 | 159.4309294 | 76.27380965 | 86.58886897 | 133.6174333 | 123.5501503 | 74.81087926 | 72.1220803  | 44.31272148 | 102.8750101 |
| ENSMUSG00000023008 | -0.319502993 | 5.84915347   | 2.207141102 | 0.137373042 | 0.999071534 | Fmn13      | Fmn13      | FMNL3     | 65.33761123 | 67.64994067 | 72.50387731 | 69.03519602 | 56.24620297 | 77.27341554 | 35.59341141 | 48.63404649 | 40.777132   | 49.01922338 |
| ENSMUSG00000097554 | 0.545181262  | 8.180263629  | 2.207019257 | 0.137383895 | 0.999071534 | Gm26825    | Gm26825    |           | 177.836205  | 154.0948254 | 332.6965289 | 286.1318074 | 267.1040616 | 178.2672957 | 203.5943133 | 357.8471034 | 473.0618723 | 361.1736379 |
| ENSMUSG00000034707 | -0.36208644  | 7.190605501  | 2.206211429 | 0.137455874 | 0.999071534 | Gns        | Gns        | GNS       | 166.2564995 | 206.8036749 | 156.2502314 | 141.7476437 | 183.5849904 | 174.7019498 | 113.8989165 | 154.4683636 | 79.82575358 | 105.6200866 |
| ENSMUSG00000071037 | -0.786182623 | 1.327581886  | 2.2055681   | 0.137513226 | 0.999071534 | Camkmt     | Camkmt     | CAMKMT    | 2.245761073 | 2.668051998 | 2.827449254 | 4.162926393 | 3.597140888 | 3.128772945 | 2.718042326 | 1.381649048 | 0.471411931 | 1.111102397 |
| ENSMUSG00000081553 | 1.070970739  | 0.828381861  | 2.204581275 | 0.137601253 | 0.999071534 | Gm12699    | Gm12699    | Ccdc50-ps | 0.421080201 | 0.415030311 | 2.01960661  | 1.734552664 | 0.915635862 | 0.582097292 | 1.035444696 | 1.312566595 | 4.478413341 | 2.61435858  |
| ENSMUSG00000020385 | 0.429751677  | 6.077103993  | 2.203395862 | 0.137707077 | 0.999071534 | Clk4       | Clk4       | CLK4      | 55.2316864  | 43.87463286 | 56.07774354 | 81.66273941 | 59.18931824 | 49.47826984 | 47.82460188 | 84.90233399 | 82.26138189 | 97.18878022 |
| ENSMUSG00000001506 | -0.42956233  | 11.03058842  | 2.202613872 | 0.137776937 | 0.999071534 | Col1a1     | Col1a1     | COL1A1    | 2448.72173  | 2712.934562 | 2632.624537 | 2076.398303 | 2621.007656 | 3485.816872 | 1443.798198 | 1623.023137 | 855.4555167 | 1644.954419 |
| ENSMUSG00000040034 | 0.392359506  | 5.231649782  | 2.201786908 | 0.137850857 | 0.999071534 | Nup43      | Nup43      | NUP43     | 43.02036056 | 23.18240736 | 34.53527304 | 34.9685817  | 32.30886543 | 42.9296753  | 67.04504404 | 26.59674417 | 29.54181432 | 40.52255799 |
| ENSMUSG00000049608 | -1.573668227 | -0.625926164 | 2.201604081 | 0.137867206 | 0.999071534 | Gpr55      | Gpr55      | GPR55     | 1.19306057  | 0.948640711 | 0.269280881 | 1.318260024 | 0.196207685 | 0.654859454 | 0           | 0.069082452 | 0           | 0.588230681 |
| ENSMUSG00000026012 | -1.625569087 | -0.093918076 | 2.199285562 | 0.138074719 | 0.999071534 | Cd28       | Cd28       | CD28      | 1.754500839 | 2.845922132 | 1.077123525 | 0           | 0.588623054 | 1.236956746 | 0.388291761 | 0.414494714 | 0           | 0           |
| ENSMUSG00000025854 | -0.566196873 | 3.062916715  | 2.198955487 | 0.13810429  | 0.999071534 | Fam20c     | Fam20c     | FAM20C    | 15.01852718 | 11.68013875 | 7.741825339 | 7.146356975 | 9.679579116 | 12.07851881 | 8.218842272 | 5.802926001 | 2.828471584 | 4.575127515 |
| ENSMUSG00000097022 | 1.162750358  | 0.200423547  | 2.196955809 | 0.13828359  | 0.999071534 | BC001981   | BC001981   |           | 0.561440268 | 0.177870133 | 1.077123525 | 0.624438959 | 0.850233301 | 0.363810808 | 0.906014109 | 3.17779281  | 1.571373102 | 0.522871716 |
| ENSMUSG00000087480 | 1.029323414  | 1.084954723  | 2.196871455 | 0.138291159 | 0.999071534 | Gm15910    | Gm15910    |           | 0.421080201 | 0.5336104   | 2.625488593 | 2.081463196 | 1.111843547 | 0.9459081   | 1.100159989 | 1.4507315   | 5.106962581 | 3.464025119 |
| ENSMUSG00000097230 | 0.840849336  | 2.483490091  | 2.193886809 | 0.138559278 | 0.999071534 | Gm26853    | Gm26853    |           | 2.947561409 | 2.608761954 | 6.328100712 | 4.648601139 | 3.727946011 | 2.40115133  | 1.164875283 | 7.184575049 | 10.99961171 | 9.934562605 |
| ENSMUSG00000061244 | 0.345912627  | 6.622401519  | 2.192272372 | 0.138704551 | 0.999071534 | Exoc5      | Exoc5      | EXOC5     | 77.68929713 | 89.64654714 | 105.0195437 | 86.58886897 | 90.45174269 | 101.2121667 | 114.9990765 | 94.91928959 | 121.3885721 | 88.43067898 |
| ENSMUSG00000066629 | 0.968250731  | 0.641876884  | 2.191039785 | 0.138815578 | 0.999071534 | Rpl36-ps3  | Rpl36-ps3  |           | 0.912340436 | 0.415030311 | 0.673202203 | 1.873316877 | 1.111843547 | 0.509335131 | 1.812028217 | 2.625133191 | 1.807079067 | 2.091486864 |
| ENSMUSG00000019866 | -0.332652865 | 6.179286     | 2.189641283 | 0.138941671 | 0.999071534 | Aim1       | Aim1       | AIM1      | 81.26847884 | 86.50417479 | 59.9149961  | 93.2495512  | 97.25360909 | 74.36292908 | 49.76606069 | 58.30558982 | 49.65539002 | 78.69219326 |
| ENSMUSG00000061315 | 0.475511105  | 9.99987088   | 2.189029231 | 0.138996896 | 0.999071534 | Naca       | Naca       | NACA2     | 713.5905811 | 635.8264362 | 1103.647692 | 1093.947674 | 873.320405  | 610.401773  | 1243.245503 | 1307.661741 | 1243.506104 | 1144.174033 |
| ENSMUSG00000015747 | -0.436359826 | 4.265133262  | 2.187260298 | 0.139156643 | 0.999071534 | Vps45      | Vps45      | VPS45     | 29.61597415 | 25.25755892 | 18.44574037 | 21.85536356 | 18.96674286 | 24.30256195 | 22.71506801 | 8.773471454 | 8.956826681 | 16.14366423 |
| ENSMUSG00000069804 | 1.320409034  | 1.674342917  | 2.186809229 | 0.139197411 | 0.999071534 | Gm10277    | Gm10277    |           | 0.701800335 | 0.118580089 | 4.577774983 | 3.191576901 | 0.39241537  | 0.582097292 | 0.582437641 | 1.381649048 | 8.485414751 | 8.431306421 |
| ENSMUSG00000067058 | 0.650789613  | 5.859769296  | 2.185853189 | 0.139283862 | 0.999071534 | Rps15a-ps5 | Rps15a-ps5 |           | 6.73728322  | 66.87917009 | 39.58428956 | 60.15428638 | 59.32012337 | 35.65345915 | 70.34552401 | 72.32932766 | 95.85375922 | 50.2610437  |
| ENSMUSG00000030047 | -0.460951078 | 3.354741052  | 2.185072635 | 0.13935449  | 0.999071534 | Arhgap25   | Arhgap25   | ARHGAP25  | 15.43960738 | 12.45090933 | 11.2424768  | 10.47669809 | 11.24924059 | 11.3508972  | 10.03087049 | 5.388431287 | 6.049786443 | 8.888819173 |

|                    |              |              |             |             |             |           |           |          |             |             |             |             |             |             |             |             |             |             |
|--------------------|--------------|--------------|-------------|-------------|-------------|-----------|-----------|----------|-------------|-------------|-------------|-------------|-------------|-------------|-------------|-------------|-------------|-------------|
| ENSMUSG00000056718 | 1.193327633  | 0.061604118  | 2.184580897 | 0.139399005 | 0.999071534 | Gm13199   | Gm13199   |          | 1.263240604 | 0.415030311 | 0.740522424 | 0           | 0.523220493 | 1.091432423 | 0.517722348 | 2.072473572 | 1.335667137 | 1.045743432 |
| ENSMUSG00000089646 | 0.862370747  | 0.950037091  | 2.183473442 | 0.139499316 | 0.999071534 | Gm15796   | Gm15796   |          | 0.631620302 | 2.075151554 | 0.605881983 | 0.693821065 | 2.681505025 | 1.964578361 | 2.135604685 | 2.348803381 | 2.278490998 | 2.352922722 |
| ENSMUSG00000029632 | 0.506101372  | 7.709250631  | 2.182611362 | 0.139577458 | 0.999071534 | Ndufa4    | Ndufa4    | NDUFA4   | 224.3655672 | 110.5166428 | 175.369174  | 230.2792116 | 151.9955531 | 163.2055283 | 420.5846923 | 128.424279  | 214.3352911 | 241.239938  |
| ENSMUSG00000045624 | 0.506265132  | 6.440781518  | 2.181454491 | 0.139682399 | 0.999071534 | Esf1      | Esf1      | ESF1     | 42.31856023 | 61.48377605 | 103.5384989 | 88.25403953 | 74.16650485 | 73.19873449 | 42.7120937  | 96.02460883 | 139.3807941 | 118.6918795 |
| ENSMUSG00000034931 | -0.351622952 | 4.770834439  | 2.181297385 | 0.139696657 | 0.999071534 | Dhx8      | Dhx8      | DHX8     | 33.96713623 | 37.35272798 | 29.08233519 | 27.47531419 | 30.54299627 | 36.45384292 | 16.17882337 | 20.79381817 | 19.56359512 | 24.24817583 |
| ENSMUSG00000043424 | 0.359035998  | 7.131596176  | 2.181149765 | 0.139710055 | 0.999071534 | Elf3j2    | Elf3j2    | EIF3J    | 107.5859914 | 122.7303919 | 132.7554745 | 144.8698385 | 127.0771772 | 167.571258  | 166.706596  | 114.5387061 | 157.0587415 | 147.9726956 |
| ENSMUSG00000042682 | 0.513154391  | 7.665912394  | 2.181044748 | 0.139719588 | 0.999071534 | Selk      | Selk      | SELK     | 133.4122438 | 154.3319856 | 200.2776555 | 203.0814259 | 173.055178  | 87.1690695  | 197.7052216 | 306.5879237 | 266.1906035 | 241.5013738 |
| ENSMUSG00000029019 | 0.536586138  | 3.829813411  | 2.18097238  | 0.139726157 | 0.999071534 | Nppb      | Nppb      |          | 10.6673651  | 16.36405226 | 9.89607239  | 13.11321814 | 9.483371431 | 6.330308052 | 20.90303979 | 18.7213446  | 17.36367278 | 14.11753633 |
| ENSMUSG00000082655 | -1.49197185  | -0.239010357 | 2.180856047 | 0.139736718 | 0.999071534 | Gm7857    | Gm7857    |          | 0.280720134 | 1.245090933 | 1.615685288 | 1.80393477  | 0.39241537  | 0.145524323 | 1.423736457 | 0           | 0.078568655 | 0.130717929 |
| ENSMUSG00000002949 | 0.318124253  | 5.325754791  | 2.1806091   | 0.13975914  | 0.999071534 | Timm44    | Timm44    | TIMM44   | 33.96713623 | 41.74019126 | 32.24638554 | 29.76492371 | 47.6784674  | 46.05844824 | 42.7120937  | 41.72580125 | 41.01283796 | 41.2415066  |
| ENSMUSG00000004040 | -0.379982043 | 6.972397516  | 2.178991901 | 0.139906076 | 0.999071534 | Stat3     | Stat3     | STAT3    | 152.4310329 | 208.1673459 | 119.4933911 | 115.243679  | 143.9510381 | 143.268696  | 78.3702204  | 143.2079238 | 68.11902397 | 101.8292667 |
| ENSMUSG00000063316 | 0.564360095  | 8.341680106  | 2.176359724 | 0.140145602 | 0.999071534 | Rpl27     | Rpl27     | RPL27    | 252.9288409 | 159.9645398 | 347.372337  | 367.5864005 | 218.9677762 | 167.2802093 | 265.3974186 | 383.891188  | 573.3940449 | 364.0494323 |
| ENSMUSG00000025747 | 0.476888756  | 5.434447341  | 2.174993106 | 0.140270145 | 0.999071534 | Tyms      | Tyms      | TYMS     | 54.67024613 | 24.01246798 | 35.0738348  | 30.45874478 | 43.81971627 | 63.30308052 | 97.00822493 | 26.87307398 | 29.2275397  | 31.63373882 |
| ENSMUSG00000029798 | -0.355139016 | 4.579512648  | 2.173654348 | 0.140392269 | 0.999071534 | Herc6     | Herc6     | HERC6    | 29.89669429 | 32.25378416 | 27.53397012 | 25.4632331  | 23.41411705 | 25.39399437 | 14.8845175  | 21.34647779 | 18.07079067 | 21.24166346 |
| ENSMUSG00000049658 | 0.352707857  | 4.596867752  | 2.172699627 | 0.140479433 | 0.999071534 | Bdp1      | Bdp1      | BDP1     | 18.52752886 | 25.73187927 | 20.66730764 | 20.53710354 | 24.32975291 | 35.79898347 | 21.74433861 | 21.34647779 | 23.25632191 | 29.2808161  |
| ENSMUSG00000031508 | 0.315819301  | 5.603717625  | 2.172572625 | 0.140491033 | 0.999071534 | Ankrd10   | Ankrd10   | ANKRD10  | 44.5643213  | 34.86254611 | 56.48166487 | 45.23713347 | 42.77327528 | 55.95410221 | 45.75371249 | 58.99641434 | 42.11279913 | 56.60086326 |
| ENSMUSG00000032946 | 0.895652417  | 1.177222069  | 2.172547444 | 0.140493333 | 0.999071534 | Rasgrp2   | Rasgrp2   | RASGRP2  | 2.526481208 | 0.652190488 | 0.875162864 | 1.248877918 | 2.550699902 | 2.110102684 | 1.423736457 | 2.348803381 | 5.185531236 | 1.633974113 |
| ENSMUSG00000021611 | -1.248848756 | -0.352544118 | 2.170644121 | 0.140667304 | 0.999071534 | Tert      | Tert      | TERT     | 1.263240604 | 1.126510844 | 0.538561763 | 0.763203172 | 1.046440986 | 0.800383777 | 0.129430587 | 0.552659619 | 0.392843275 | 0           |
| ENSMUSG00000097979 | -1.22854693  | -0.16183573  | 2.170470615 | 0.140683175 | 0.999071534 | Gm4691    | Gm4691    |          | 2.17558104  | 1.600831199 | 0.471241542 | 0.138764213 | 1.177246109 | 0.582097292 | 0.388291761 | 0.828989429 | 0.078568655 | 0.326794823 |
| ENSMUSG00000033739 | -0.543468329 | 3.140034563  | 2.168454123 | 0.140867778 | 0.999071534 | Fkbpl     | Fkbpl     | FKBPL    | 9.333944461 | 8.656346483 | 13.39672385 | 12.28063286 | 9.548773993 | 6.69411886  | 5.047792891 | 7.322739954 | 3.614158135 | 11.69925465 |
| ENSMUSG00000032459 | 0.36182676   | 4.609267027  | 2.168267574 | 0.140884869 | 0.999071534 | Mrps22    | Mrps22    | MRPS22   | 21.5452703  | 19.86216488 | 22.95619514 | 20.32895722 | 25.70320671 | 27.14028625 | 32.61650791 | 20.65565327 | 27.18475466 | 22.87563758 |
| ENSMUSG00000075359 | -1.597848243 | 1.352004298  | 2.164597231 | 0.141221621 | 0.999071534 | Gm20775   | Gm20775   |          | 2.17558104  | 11.91729893 | 2.288887492 | 0           | 2.550699902 | 2.037340523 | 3.365195261 | 0           | 0           | 0.71894861  |
| ENSMUSG00000056692 | -0.33931736  | 6.63275363   | 2.163890509 | 0.141286566 | 0.999071534 | D17Wsu92e | D17Wsu92e | C6orf106 | 115.2356151 | 148.7587214 | 102.663336  | 104.3506882 | 104.3170857 | 141.0858312 | 73.77543457 | 68.66795768 | 57.82653015 | 93.65939614 |
| ENSMUSG00000057649 | 0.419710644  | 5.036090862  | 2.162988604 | 0.141369496 | 0.999071534 | Brd9      | Brd9      | BRD9     | 26.38769261 | 21.99660648 | 26.92808814 | 39.2008902  | 29.69276296 | 34.99859969 | 19.54401863 | 33.0904947  | 43.68417223 | 44.96696758 |
| ENSMUSG00000021123 | 1.292742032  | -0.110059741 | 2.16080613  | 0.141570402 | 0.999071534 | Rdh12     | Rdh12     | RDH12    | 0           | 0.415030311 | 0.269280881 | 1.110113705 | 0.588623054 | 0.873145938 | 0.388291761 | 0.621742072 | 2.042785033 | 1.372538255 |
| ENSMUSG00000082816 | -1.063095972 | 0.152084565  | 2.159718547 | 0.141670638 | 0.999071534 | Gm11953   | Gm11953   |          | 1.122880537 | 2.490181865 | 1.009803305 | 0.485674746 | 1.765869163 | 0.145524323 | 0.582437641 | 0.759906976 | 0.628549241 | 0.784307574 |
| ENSMUSG00000050493 | -0.457000566 | 3.671009156  | 2.159335297 | 0.141705979 | 0.999071534 | Fam167b   | Fam167b   | FAM167B  | 15.08870721 | 9.249246928 | 16.49345398 | 19.0800793  | 15.43500454 | 15.4983404  | 12.61948223 | 9.740625788 | 6.835472994 | 7.777716776 |
| ENSMUSG00000085234 | 1.291701836  | 0.269262863  | 2.158798782 | 0.141755469 | 0.999071534 | Gm15614   | Gm15614   |          | 0.070180034 | 1.245090933 | 0.336601102 | 1.387642131 | 0.196207685 | 0.509335131 | 0.517722348 | 1.381649048 | 3.535589479 | 0.915025503 |
| ENSMUSG00000051316 | 0.595259037  | 2.411018593  | 2.158625802 | 0.14177143  | 0.999071534 | Taf7      | Taf7      | TAF7     | 4.631882214 | 4.624623464 | 4.173853661 | 2.844666369 | 5.297607489 | 4.365729691 | 5.306654065 | 8.289894287 | 6.599767028 | 4.771204409 |
| ENSMUSG00000025925 | 0.388015837  | 4.302948666  | 2.158433362 | 0.141789165 | 0.999071534 | Terf1     | Terf1     | TERF1    | 18.52752886 | 13.93316044 | 14.81044848 | 16.9986161  | 24.06814267 | 18.77263767 | 22.13263037 | 18.92859196 | 21.13496822 | 24.77104755 |
| ENSMUSG00000073682 | 1.31527928   | 0.265964204  | 2.158093093 | 0.141820595 | 0.999071534 | Gm10563   | Gm10563   |          | 0.701800335 | 0.711480533 | 0.471241542 | 0.901967385 | 0.457817931 | 0.436572969 | 0           | 1.105319238 | 3.614158135 | 1.699333077 |
| ENSMUSG00000025417 | -0.368558308 | 5.562401876  | 2.157059283 | 0.141916063 | 0.999071534 | Pip4k2c   | Pip4k2c   | PIP4K2C  | 70.39057364 | 75.95054689 | 38.43984582 | 43.08628817 | 49.11732376 | 62.28441026 | 38.89389138 | 43.86735727 | 20.11357571 | 39.93432731 |
| ENSMUSG00000095123 | 0.49068208   | 3.648072147  | 2.156261848 | 0.141989751 | 0.999071534 | Gm21781   | Gm21781   |          | 12.70258607 | 7.589125684 | 9.222870187 | 14.15394974 | 9.614176555 | 11.64194584 | 8.73656462  | 15.88896405 | 15.00661312 | 17.1240487  |
| ENSMUSG00000028525 | -0.454295635 | 4.750991595  | 2.155809051 | 0.142031612 | 0.999071534 | Pde4b     | Pde4b     | PDE4B    | 33.82677617 | 57.03702272 | 29.55357673 | 22.54918463 | 18.37811981 | 28.52276732 | 29.25131265 | 24.10977589 | 10.52819978 | 19.41161246 |
| ENSMUSG00000056481 | -0.389612274 | 6.842816491  | 2.155786497 | 0.142033698 | 0.999071534 | Cd248     | Cd248     | CD248    | 105.1998703 | 147.1578902 | 141.3724627 | 169.3617221 | 107.6526164 | 98.5199667  | 59.27920883 | 106.8705539 | 103.867762  | 102.6135743 |
| ENSMUSG00000032294 | -0.417991555 | 10.88439422  | 2.153961429 | 0.142202568 | 0.999071534 | Pkm       | Pkm       | PKM      | 2416.017835 | 3159.803627 | 1673.580678 | 1707.909935 | 2320.417483 | 2143.354992 | 1278.450623 | 2088.155289 | 931.4314062 | 1523.648181 |
| ENSMUSG00000037613 | -0.410612677 | 6.096244315  | 2.152922211 | 0.142298826 | 0.999071534 | Tnfrsf23  | Tnfrsf23  | TNFRSF23 | 63.16203019 | 134.884851  | 67.8587821  | 61.61131062 | 78.41767135 | 65.0493724  | 45.04184426 | 88.42553906 | 32.05601128 | 55.55511983 |
| ENSMUSG00000005980 | 0.879638622  | 1.048056157  | 2.152551314 | 0.142333198 | 0.999071534 | Dnase1    | Dnase1    | DNASE1   | 1.333420637 | 1.363671021 | 1.144443746 | 2.22022741  | 0.981038424 | 1.018670261 | 1.359021163 | 1.4507315   | 3.299883514 | 4.509768551 |
| ENSMUSG00000038327 | -2.275196294 | -0.833380523 | 2.151502319 | 0.142430462 | 0.999071534 | Serpinb9f | Serpinb9f | SERPINB9 | 2.456301174 | 1.185800888 | 0.06732022  | 0           | 0           | 0           | 0.388291761 | 0           | 0.235705965 | 0           |

|                      |              |              |             |             |             |               |               |            |             |             |             |             |             |             |             |             |             |
|----------------------|--------------|--------------|-------------|-------------|-------------|---------------|---------------|------------|-------------|-------------|-------------|-------------|-------------|-------------|-------------|-------------|-------------|
| ENSMUSG00000087412   | 1.370685886  | 7.680632335  | 2.150667441 | 0.142507927 | 0.999071534 | Gm15501       | Gm15501       | 0          | 118.9951191 | 195.2959592 | 79.92818674 | 201.0474743 | 11.20537287 | 370.3656246 | 486.6167947 | 277.8187644 | 208.2336609 |
| ENSMUSG000000097119  | 0.450288159  | 4.396738352  | 2.150324354 | 0.142539774 | 0.999071534 | B230354K17Rik | B230354K17Rik | 12.1411458 | 15.53399163 | 24.23527932 | 17.69243717 | 22.10606582 | 18.19054038 | 14.56094103 | 25.21509512 | 28.75612777 | 26.20894477 |
| ENSMUSG000000063011  | 0.486648881  | 8.006158658  | 2.149900599 | 0.14257912  | 0.999071534 | Msln          | Msln          | MSLN       | 167.0284798 | 166.7828949 | 225.0514966 | 291.1273191 | 254.4159646 | 162.3323824 | 218.4141155 | 331.526689  | 362.8300492 |
| ENSMUSG000000039771  | 0.405624992  | 5.693048653  | 2.149767787 | 0.142591454 | 0.999071534 | Polr2j        | Polr2j        | POLR2J     | 34.1074963  | 29.40786203 | 50.2882046  | 52.31410834 | 63.76749756 | 36.16279428 | 57.92018766 | 63.90126846 | 58.29794208 |
| ENSMUSG000000051457  | -0.712856757 | 2.416649228  | 2.149367053 | 0.142628678 | 0.999071534 | Spn           | Spn           | SPN        | 7.088183388 | 11.97658897 | 4.712415424 | 4.301690606 | 5.624620297 | 10.55051342 | 2.265035272 | 2.417885834 | 2.985608894 |
| ENSMUSG00000079018   | -0.378043379 | 5.078111948  | 2.149333739 | 0.142631773 | 0.999071534 | Ly6c1         | Ly6c1         |            | 33.54605603 | 38.06420851 | 39.92089066 | 45.5146619  | 39.76475745 | 42.78415098 | 33.84609849 | 28.80738265 | 10.8424744  |
| ENSMUSG00000005611   | -0.933014271 | 1.596853779  | 2.147837432 | 0.142770863 | 0.999071534 | Mrvl1         | Mrvl1         | MRV1       | 2.596661241 | 3.794562842 | 5.520258068 | 5.203657991 | 2.354492217 | 6.69411886  | 1.29430587  | 0.207247357 | 0.942823861 |
| ENSMUSG000000063694  | 0.456824011  | 6.029633763  | 2.146859469 | 0.142861852 | 0.999071534 | Cycs          | Cycs          | CYCS       | 53.26664546 | 33.67674522 | 75.39864678 | 75.76526035 | 44.86615725 | 51.15179955 | 74.68144868 | 49.67028327 | 100.7250158 |
| ENSMUSG000000041168  | -0.320347875 | 6.29050055   | 2.145508656 | 0.142987639 | 0.999071534 | Lonp1         | Lonp1         | LONP1      | 92.63764428 | 122.1374915 | 78.0914556  | 65.6354728  | 94.11428614 | 90.80717758 | 60.63822999 | 70.87859616 | 54.36950933 |
| ENSMUSG000000061242  | -0.804110072 | 5.602832223  | 2.144754329 | 0.143057935 | 0.999071534 | Gm9104        | Gm9104        |            | 116.8497558 | 11.85800888 | 86.23720226 | 71.67171607 | 32.17806031 | 29.61419974 | 11.13103048 | 26.87307398 | 9.506807267 |
| ENSMUSG000000019737  | 1.507833405  | -0.812496666 | 2.142997526 | 0.143221804 | 0.999071534 | Syne4         | Syne4         | SYNE4      | 0.140360067 | 0.177870133 | 0.134640441 | 0.555056852 | 0.130805123 | 1.018670261 | 0           | 1.036236786 | 0.15713731  |
| ENSMUSG000000031980  | -1.011423833 | 1.296827293  | 2.142757646 | 0.143244195 | 0.999071534 | Agt           | Agt           | AGT        | 0.210540101 | 7.411255551 | 2.01960661  | 4.301690606 | 1.962076848 | 2.473913492 | 0.517722348 | 2.141556024 | 0.942823861 |
| ENSMUSG000000030397  | -0.380150474 | 4.728081423  | 2.142448842 | 0.143273027 | 0.999071534 | Mark4         | Mark4         | MARK4      | 28.49309362 | 38.716399   | 27.87057122 | 24.63064782 | 35.64439607 | 29.46867542 | 13.71964222 | 28.8764651  | 14.53520119 |
| ENSMUSG000000001098  | -0.388496886 | 7.597130351  | 2.142219083 | 0.143294482 | 0.999071534 | Kctd10        | Kctd10        | KCTD10     | 215.1719828 | 307.5967504 | 193.1417122 | 186.6378666 | 239.9619985 | 256.7049059 | 159.4584831 | 176.1602536 | 86.11124599 |
| ENSMUSG000000021509  | 1.041140443  | 1.015257234  | 2.140330866 | 0.143470945 | 0.999071534 | Slc25a48      | Slc25a48      | SLC25A48   | 0.701800335 | 1.778701332 | 0.06732022  | 1.873316877 | 1.962076848 | 2.182864846 | 2.78275762  | 5.250266382 | 1.414235792 |
| ENSMUSG000000041740  | -0.396534491 | 7.002293845  | 2.139916242 | 0.143509727 | 0.999071534 | Rnf10         | Rnf10         | RNF10      | 168.1513604 | 210.953978  | 102.3940551 | 100.3265261 | 179.3338239 | 175.4295714 | 100.8264272 | 115.436778  | 60.10502115 |
| ENSMUSG000000031548  | 0.883746669  | 2.865352853  | 2.139547963 | 0.143544183 | 0.999071534 | Sfrp1         | Sfrp1         | SFRP1      | 4.702062247 | 3.675982753 | 11.2424768  | 1.942698983 | 4.643581873 | 13.2427134  | 24.7859574  | 1.865226215 | 2.357059653 |
| ENSMUSG0000000024843 | 0.324830126  | 5.553983522  | 2.139524358 | 0.143546392 | 0.999071534 | Chka          | Chka          | CHKA       | 52.84556526 | 46.24623464 | 42.20977815 | 38.43768703 | 36.42922681 | 53.04361575 | 39.7351902  | 47.94322196 | 55.78374512 |
| ENSMUSG000000050222  | -0.997928868 | 0.401035768  | 2.137802666 | 0.143707601 | 0.999071534 | Il17d         | Il17d         | IL17D      | 1.473780704 | 0.474320355 | 2.154247051 | 2.705902155 | 1.308051232 | 0.800383777 | 0.841298815 | 0.207247357 | 0.707117896 |
| ENSMUSG0000000032193 | 0.408342417  | 5.462481303  | 2.137726527 | 0.143714735 | 0.999071534 | Ldlr          | Ldlr          | LDLR       | 54.10880586 | 28.10348105 | 31.90978444 | 38.1601586  | 44.2775342  | 99.10206399 | 52.48410301 | 27.77114586 | 34.72734555 |
| ENSMUSG0000000031502 | -0.469434063 | 7.838332002  | 2.137425536 | 0.14374294  | 0.999071534 | Col4a1        | Col4a1        | COL4A1     | 211.241901  | 436.7304671 | 254.201152  | 222.9247083 | 256.8358594 | 403.0296127 | 165.0887137 | 180.9960253 | 90.19681605 |
| ENSMUSG000000029156  | 0.439921801  | 4.400160905  | 2.135400043 | 0.143932909 | 0.999071534 | Sgcb          | Sgcb          | SGCB       | 18.80824899 | 17.84630337 | 17.09933597 | 15.81912029 | 23.1525068  | 20.37340523 | 42.77680899 | 13.54016067 | 19.72073243 |
| ENSMUSG000000060904  | 0.438189125  | 8.504080352  | 2.135085576 | 0.143962428 | 0.999071534 | Arl1          | Arl1          | ARL1       | 273.2108706 | 354.4358855 | 286.4475376 | 322.0717386 | 363.703645  | 247.75516   | 621.2668174 | 430.7981731 | 344.9163959 |
| ENSMUSG000000040605  | -0.753746311 | 1.744385931  | 2.134862377 | 0.143983384 | 0.999071534 | Bace2         | Bace2         | BACE2      | 4.491522147 | 5.869714396 | 2.827449254 | 6.244389589 | 1.308051232 | 2.837724299 | 3.106334087 | 2.556050739 | 1.807079067 |
| ENSMUSG000000074971  | 1.261897897  | 2.353565663  | 2.132673891 | 0.144189038 | 0.999071534 | Fibin         | Fibin         | FIBIN      | 5.965302851 | 2.786632087 | 2.894769475 | 0.832585279 | 2.87771271  | 7.348978314 | 26.27440915 | 0.690824524 | 0.078568655 |
| ENSMUSG0000000025231 | -0.482633697 | 3.75998132   | 2.132373813 | 0.144217263 | 0.999071534 | Sufu          | Sufu          | SUFU       | 19.58022936 | 20.09932505 | 12.18495988 | 13.46012867 | 16.15443271 | 21.46483765 | 10.22501637 | 5.872008453 | 5.892649132 |
| ENSMUSG000000045664  | -0.369597438 | 5.008025271  | 2.132264689 | 0.144227528 | 0.999071534 | Cdc42ep2      | Cdc42ep2      | CDC42EP2   | 36.98487768 | 36.5819574  | 44.22938476 | 29.6261595  | 40.61499075 | 31.14220513 | 19.99702569 | 42.34754332 | 16.02800564 |
| ENSMUSG0000000022971 | -0.321042008 | 5.598241007  | 2.129621645 | 0.144476414 | 0.999071534 | Ifnar2        | Ifnar2        | IFNAR2     | 53.68772566 | 71.32592342 | 49.48036195 | 48.49809248 | 56.11539785 | 51.66113468 | 39.21746785 | 55.68045663 | 29.38467701 |
| ENSMUSG000000044477  | -0.351291118 | 6.553163852  | 2.128820637 | 0.144551937 | 0.999071534 | Zfand3        | Zfand3        | ZFAND3     | 90.04098303 | 122.5525218 | 111.6169253 | 110.5256957 | 110.3341214 | 85.2772533  | 52.87239477 | 110.1174291 | 60.65500174 |
| ENSMUSG000000004609  | -0.470568701 | 4.486753762  | 2.128394094 | 0.144592172 | 0.999071534 | Cd33          | Cd33          |            | 35.23037684 | 29.46715207 | 27.26468924 | 25.25508678 | 17.2008737  | 41.91100504 | 20.06174098 | 12.15851162 | 9.899650542 |
| ENSMUSG000000080059  | 0.797667416  | 1.591960251  | 2.127907933 | 0.144638046 | 0.999071534 | Rps19-ps3     | Rps19-ps3     |            | 2.38612114  | 0.830060622 | 1.211763966 | 3.81601586  | 2.616102464 | 1.964578361 | 2.718042326 | 2.970545453 | 3.8498641   |
| ENSMUSG000000046806  | 0.587938051  | 2.284299154  | 2.127617016 | 0.144665505 | 0.999071534 | 3110062M04Rik | 3110062M04Rik | C7orf49    | 5.684582717 | 3.853852886 | 3.433331237 | 2.567137942 | 4.251166504 | 6.766881022 | 7.895265804 | 4.62852431  | 2.985608894 |
| ENSMUSG000000078651  | 0.675471895  | 3.140437616  | 2.127137477 | 0.14471078  | 0.999071534 | Aoc2          | Aoc2          | AOC2       | 4.702062247 | 4.506043375 | 10.63659481 | 8.04832436  | 6.671061283 | 7.567264798 | 3.753487022 | 6.700997882 | 17.20653547 |
| ENSMUSG0000000028261 | 0.473362633  | 4.463441527  | 2.125936029 | 0.144824283 | 0.999071534 | Ndufaf4       | Ndufaf4       | NDUFAF4    | 24.42265167 | 13.28096995 | 20.26338632 | 14.01518552 | 23.87193498 | 30.99668081 | 42.97095487 | 11.12227484 | 14.06378926 |
| ENSMUSG000000073650  | 0.576317836  | 3.23464174   | 2.125286125 | 0.144885722 | 0.999071534 | Gm216         | Catip         | CATIP      | 8.842684226 | 7.470545595 | 7.80914556  | 7.562649614 | 6.998074091 | 6.184783729 | 5.630230533 | 15.33630443 | 7.464022234 |
| ENSMUSG000000040936  | -0.617410924 | 2.047236656  | 2.124756227 | 0.144935838 | 0.999071534 | Ulk4          | Ulk4          | ULK4       | 5.895122818 | 3.972432975 | 5.722218729 | 5.966861163 | 3.466335765 | 4.656778337 | 3.559341141 | 2.141556024 | 1.807079067 |
| ENSMUSG000000044258  | -0.451507742 | 6.452909     | 2.124679526 | 0.144943094 | 0.999071534 | Ctla2a        | Ctla2a        |            | 154.746974  | 155.5770765 | 66.98361924 | 81.5239752  | 68.08406662 | 55.88134005 | 100.5675661 | 74.95446085 | 37.08440521 |
| ENSMUSG000000002661  | 0.458831385  | 3.327669569  | 2.123637607 | 0.145041698 | 0.999071534 | Alkbh7        | Alkbh7        | ALKBH7     | 10.0357448  | 7.944865951 | 7.741825339 | 8.533999106 | 9.090950602 | 8.876983706 | 13.20191987 | 10.70778012 | 10.92104306 |
| ENSMUSG000000071715  | -0.331109975 | 5.217249596  | 2.122570803 | 0.145142736 | 0.999071534 | Ncf4          | Ncf4          | NCF4       | 56.9160072  | 34.32893571 | 38.37252559 | 42.80875974 | 42.18465223 | 45.33082663 | 30.54561852 | 33.02141224 | 18.85647722 |

|                     |              |             |             |             |             |               |               |               |             |             |             |             |             |             |             |             |             |             |
|---------------------|--------------|-------------|-------------|-------------|-------------|---------------|---------------|---------------|-------------|-------------|-------------|-------------|-------------|-------------|-------------|-------------|-------------|-------------|
| ENSMUSG00000043671  | -0.33724886  | 4.960805331 | 2.122441888 | 0.145154951 | 0.999071534 | Dpy19B        | Dpy19B        | DPY19L3       | 32.49335553 | 48.61783641 | 27.1300488  | 31.91576901 | 39.96096514 | 39.58261587 | 25.8214021  | 26.73490908 | 18.5422026  | 24.37889376 |
| ENSMUSG00000063268  | -0.357906467 | 5.882544823 | 2.121717135 | 0.145223644 | 0.999071534 | Parp10        | Parp10        | PARP10        | 69.47823321 | 67.8278108  | 75.8025681  | 74.30823611 | 54.80734662 | 66.50461563 | 25.43311034 | 54.92054965 | 43.68417223 | 59.80345252 |
| ENSMUSG00000081400  | -0.780883657 | 2.298375466 | 2.121081577 | 0.145283914 | 0.999071534 | Gm13680       | Gm13680       |               | 9.755024662 | 9.071376794 | 4.645095204 | 4.856747458 | 3.139322957 | 6.69411886  | 6.147952881 | 2.279720929 | 0.471411931 | 2.483640651 |
| ENSMUSG00000084401  | 0.930435038  | 0.563793358 | 2.120965572 | 0.145294918 | 0.999071534 | Gm12586       | Gm12586       |               | 0.350900168 | 0.415030311 | 0.807842644 | 1.942698983 | 1.24264867  | 1.673529715 | 1.359021163 | 1.4507315   | 1.885647722 | 2.091486864 |
| ENSMUSG00000073147  | 0.524154638  | 4.357097824 | 2.120356153 | 0.14535274  | 0.999071534 | 5031425E22Rik | 5031425E22Rik |               | 14.80798708 | 12.62877946 | 23.56207712 | 21.1615425  | 13.99614818 | 13.31547556 | 12.29590576 | 19.61941648 | 29.2275397  | 36.86245598 |
| ENSMUSG00000033032  | -0.441777358 | 3.722148249 | 2.120057012 | 0.145381132 | 0.999071534 | Afap1l1       | Afap1l1       | AFAP1L1       | 17.19410822 | 16.83837261 | 11.30979702 | 15.0591712  | 17.85489932 | 19.64578361 | 11.64875283 | 7.184575049 | 8.17114013  | 8.56202435  |
| ENSMUSG00000035266  | 0.447029303  | 3.278563665 | 2.118909286 | 0.145490124 | 0.999071534 | Helq          | Helq          | HELQ          | 7.509263589 | 8.004155995 | 9.492151068 | 7.84017804  | 9.221761185 | 14.91624311 | 10.8721693  | 8.842553906 | 7.935434165 | 11.63389568 |
| ENSMUSG00000029231  | -0.436756109 | 8.350836012 | 2.118097431 | 0.145567276 | 0.999071534 | Pdgfra        | Pdgfra        | RP11-231C18.3 | 294.8965009 | 470.5850825 | 296.7475313 | 420.1086552 | 464.4235899 | 255.3224248 | 172.7898336 | 406.8956446 | 204.3570719 | 291.0434689 |
| ENSMUSG00000056919  | 0.497568316  | 3.831109248 | 2.117882027 | 0.145587754 | 0.999071534 | 4922501C03Rik | Cep162        | CEP162        | 12.21132584 | 8.656346483 | 9.290190407 | 14.77838869 | 15.63121222 | 13.89757285 | 7.636404631 | 19.68849893 | 16.42084892 | 20.45735589 |
| ENSMUSG00000090210  | 1.028505583  | 1.190752935 | 2.117608415 | 0.14561377  | 0.999071534 | Itga10        | Itga10        | ITGA10        | 2.38612114  | 0.770770577 | 2.558168373 | 0           | 1.765869163 | 1.746291877 | 1.29430587  | 3.730452429 | 2.907040239 | 3.92153787  |
| ENSMUSG00000003228  | -0.40617082  | 3.866692511 | 2.11725783  | 0.145647113 | 0.999071534 | Grk5          | Grk5          | GRK5          | 14.73780704 | 20.04003501 | 12.99280253 | 19.77390037 | 17.72409419 | 14.77071879 | 9.966155196 | 12.9184186  | 10.99961171 | 11.37245982 |
| ENSMUSG00000020205  | 0.515357396  | 7.818051455 | 2.117191136 | 0.145653457 | 0.999071534 | Phda1         | Phda1         | PHLDA1        | 147.0271703 | 164.0555529 | 250.5658601 | 180.8097697 | 220.7990479 | 166.4798256 | 129.5600175 | 301.7521521 | 393.4718247 | 219.8021976 |
| ENSMUSG00000030116  | 0.907591045  | 2.100788012 | 2.116808914 | 0.145689821 | 0.999071534 | Mfap5         | Mfap5         | MFAP5         | 4.912602348 | 0.711480533 | 4.375814322 | 2.358991623 | 2.681505025 | 6.839643183 | 14.30207986 | 1.312566595 | 2.592765618 | 1.960768935 |
| ENSMUSG00000037370  | -0.387971733 | 5.360395723 | 2.114916207 | 0.145870038 | 0.999071534 | Enpp1         | Enpp1         | ENPP1         | 41.33603976 | 73.87539533 | 45.64310939 | 42.04555657 | 38.26049853 | 63.73965349 | 40.51177372 | 28.25472303 | 21.68494881 | 23.85602204 |
| ENSMUSG00000044712  | 0.496464439  | 7.861993356 | 2.114538215 | 0.145906059 | 0.999071534 | Slc38a6       | Slc38a6       | SLC38A6       | 178.1169251 | 118.876539  | 239.4580238 | 295.3596276 | 159.1898349 | 207.3721603 | 198.8700969 | 199.7864523 | 372.4939938 | 282.4814446 |
| ENSMUSG00000040296  | -0.382323325 | 5.060730632 | 2.114394138 | 0.145919791 | 0.999071534 | Ddx58         | Ddx58         | DDX58         | 32.91443573 | 55.49548157 | 37.16076163 | 28.86295632 | 41.59602918 | 44.96701582 | 15.98467749 | 33.02141224 | 19.40645781 | 29.2808161  |
| ENSMUSG00000020120  | -0.434800892 | 5.662024205 | 2.114198098 | 0.145938479 | 0.999071534 | Plek          | Plek          | PLEK          | 80.98775871 | 91.01021816 | 43.48886234 | 48.22056405 | 38.71831646 | 80.98428577 | 47.95403247 | 25.21509512 | 22.15636074 | 41.30686557 |
| ENSMUSG00000037548  | -0.561248784 | 3.156360534 | 2.113187488 | 0.14603486  | 0.999071534 | H2-DMb2       | H2-DMb2       | HLA-DMB       | 16.28176778 | 10.90936817 | 9.963392611 | 9.574730704 | 7.717502268 | 12.00575665 | 5.306654065 | 3.039627905 | 5.028393926 | 9.934562605 |
| ENSMUSG00000017999  | 0.319398481  | 5.440805823 | 2.11653156  | 0.146181325 | 0.999071534 | Ddx27         | Ddx27         | DDX27         | 43.932701   | 37.35272798 | 39.51696934 | 32.95650061 | 46.95903923 | 70.28824803 | 53.90783947 | 32.53783508 | 32.99883514 | 47.90812098 |
| ENSMUSG00000020774  | 0.660042445  | 2.181797354 | 2.111637329 | 0.146182836 | 0.999071534 | Aspa          | Aspa          | ASPA          | 3.438821644 | 2.54947191  | 2.490848153 | 5.411804311 | 3.727946011 | 3.710870238 | 4.983077598 | 3.039627905 | 6.835472994 | 6.666614379 |
| ENSMUSG00000022031  | -0.326339274 | 5.756557762 | 2.110728306 | 0.146269689 | 0.999071534 | Elp3          | Elp3          | ELP3          | 66.24995166 | 62.31383667 | 66.91629902 | 58.69726214 | 57.42344908 | 78.51037228 | 52.35467242 | 42.07121351 | 23.57059653 | 43.52907036 |
| ENSMUSG00000097163  | 0.773674124  | 3.000604931 | 2.107439365 | 0.146584419 | 0.999071534 | BC051077      | BC051077      |               | 4.77242281  | 2.253021687 | 7.674505119 | 10.75422652 | 4.316569065 | 5.966497245 | 4.594785837 | 4.214029596 | 19.01361453 | 10.91494707 |
| ENSMUSG00000003423  | 0.327140339  | 5.118128895 | 2.107252916 | 0.146602284 | 0.999071534 | Ph1d1         | Ph1d1         | PIH1D1        | 35.01983674 | 26.26548967 | 27.39932968 | 32.54020797 | 38.19509597 | 38.34565912 | 46.20671954 | 29.22187736 | 32.3702859  | 29.28073767 |
| ENSMUSG00000034563  | -0.342493409 | 5.276531387 | 2.106770353 | 0.146648532 | 0.999071534 | Ccpg1         | Ccpg1         | CCPG1         | 36.14271727 | 56.44412228 | 42.07513771 | 41.97617446 | 47.6784674  | 33.4705943  | 27.63343032 | 38.96250315 | 20.89926226 | 44.31337793 |
| ENSMUSG00000005899  | 0.363560951  | 5.102628733 | 2.105388406 | 0.146781069 | 0.999071534 | Smpd4         | Smpd4         | SMMPD4        | 29.05453389 | 26.14690958 | 39.3823289  | 27.75284262 | 33.09369617 | 38.34565912 | 23.62108212 | 34.81755601 | 40.93426931 | 45.2937624  |
| ENSMUSG00000044533  | 0.899083468  | 7.400095461 | 2.104470437 | 0.146869182 | 0.999071534 | Rps2          | Rps2          |               | 36.98487768 | 39.13142931 | 288.3998239 | 159.9257556 | 78.94089185 | 50.42417793 | 40.57648901 | 253.2562705 | 402.1929454 | 219.7368387 |
| ENSMUSG00000087575  | 0.768256924  | 2.968707618 | 2.104431362 | 0.146872934 | 0.999071534 | Gm12976       | Gm12976       |               | 7.368903522 | 2.193731643 | 8.818948865 | 7.146356975 | 3.924153696 | 4.220205368 | 2.523896446 | 10.0169556  | 15.47802505 | 11.63389568 |
| ENSMUSG00000024621  | -0.581047378 | 6.851949998 | 2.10324624  | 0.146986781 | 0.999071534 | Csf1r         | Csf1r         | CSF1R         | 195.8022936 | 188.4830512 | 102.7979765 | 101.0897292 | 134.271459  | 239.4602736 | 118.3642718 | 49.46303591 | 21.44924284 | 59.08450391 |
| ENSMUSG00000073627  | 0.834995569  | 1.162755312 | 2.102979683 | 0.147012402 | 0.999071534 | C130036L24Rik | C130036L24Rik |               | 2.315941107 | 0.948640711 | 1.211763966 | 1.734552664 | 1.700466601 | 1.964578361 | 1.100159989 | 1.588896405 | 4.556981996 | 3.267948225 |
| ENSMUSG00000022548  | -0.668405212 | 2.433402984 | 2.102808469 | 0.147028861 | 0.999071534 | Apod          | Apod          | APOD          | 4.280982046 | 7.055515284 | 9.020909526 | 8.117706466 | 4.839789558 | 9.750129644 | 2.394465859 | 3.661369977 | 1.414235792 | 3.790819941 |
| ENSMUSG00000030683  | -0.885149555 | 0.92854727  | 2.101618978 | 0.147143265 | 0.999071534 | Sez6l2        | Sez6l2        | SEZ6L2        | 2.105401006 | 4.209593153 | 1.211763966 | 2.01208109  | 2.354492217 | 2.40115133  | 0.841298815 | 2.003391119 | 0.628549241 | 0.326794823 |
| ENSMUSG000000021760 | 0.381867033  | 6.780732625 | 2.101348214 | 0.147169321 | 0.999071534 | Gpx8          | Gpx8          | GPX8          | 74.46101559 | 83.95470288 | 113.1652904 | 108.097322  | 114.0620674 | 77.56446418 | 136.0962622 | 144.5895729 | 102.8463695 | 127.1885449 |
| ENSMUSG000000072501 | 0.411445667  | 6.194606509 | 2.100924047 | 0.147210149 | 0.999071534 | Phf20l1       | Phf20l1       | PHF20L1       | 53.89826576 | 46.18694459 | 88.32412909 | 81.5239752  | 53.49929539 | 76.10922095 | 55.13743004 | 64.66117544 | 101.9035457 | 94.37834475 |
| ENSMUSG00000029050  | -0.3601606   | 6.086225472 | 2.097554167 | 0.147534975 | 0.999071534 | Ski           | Ski           | SKI           | 70.25021358 | 99.90372483 | 77.08165229 | 65.84361911 | 83.58447372 | 100.3390207 | 38.50559962 | 67.9080507  | 32.3702859  | 57.84268359 |
| ENSMUSG00000052821  | -0.591539276 | 3.269572446 | 2.09565453  | 0.147718439 | 0.999071534 | Cysltr1       | Cysltr1       | CYSLTR1       | 20.21184966 | 8.241316173 | 8.684308424 | 12.28063286 | 10.00659192 | 12.80614043 | 11.58403753 | 4.973936572 | 2.357059653 | 6.731973344 |
| ENSMUSG00000020648  | 0.620271746  | 2.356712181 | 2.095588585 | 0.147724812 | 0.999071534 | Dus4l         | Dus4l         | DUS4L         | 5.474042616 | 2.786632087 | 4.981696305 | 3.191576901 | 4.054958819 | 6.330308052 | 10.67802342 | 3.523205072 | 3.142746204 | 6.013024734 |
| ENSMUSG00000018381  | -0.479095245 | 3.646958016 | 2.094990572 | 0.147782623 | 0.999071534 | Abi3          | Abi3          | ABI3          | 20.84346996 | 13.63671021 | 17.70521795 | 8.187088573 | 15.10799173 | 19.71854577 | 8.671849326 | 8.013564478 | 6.128355098 | 9.607767782 |
| ENSMUSG00000096856  | -1.432228471 | 0.507045477 | 2.09401695  | 0.1478768   | 0.999071534 | Gm10778       | Gm10778       | ZNF788        | 0.280720134 | 6.225454663 | 0.06732022  | 1.595788451 | 1.438856355 | 1.309718907 | 1.617882337 | 0.138164905 | 0           | 0.457512752 |
| ENSMUSG00000030815  | 0.481790613  | 4.824174507 | 2.093897441 | 0.147888365 | 0.999071534 | Phkg2         | Phkg2         | PHKG2         | 20.07148959 | 17.66843323 | 32.85226753 | 25.4632331  | 25.76860927 | 23.79322682 | 12.68419752 | 34.33397884 | 37.39867983 | 45.42448033 |

|                      |              |              |             |             |             |               |               |           |             |             |             |             |             |             |             |             |             |             |
|----------------------|--------------|--------------|-------------|-------------|-------------|---------------|---------------|-----------|-------------|-------------|-------------|-------------|-------------|-------------|-------------|-------------|-------------|-------------|
| ENSMUSG00000002228   | 0.562637126  | 3.00198574   | 2.093259162 | 0.147950147 | 0.999071534 | Ppm1j         | Ppm1j         | PPM1J     | 9.404124495 | 5.810424352 | 7.337904017 | 3.607869541 | 7.128879214 | 7.130691829 | 6.212668174 | 7.668152216 | 9.349669957 | 14.11753633 |
| ENSMUSG000000024944  | -0.331555479 | 6.221718589  | 2.093097185 | 0.14796583  | 0.999071534 | Arl2          | Arl2          | ARL2      | 95.86592582 | 67.05704022 | 83.74635411 | 103.4487209 | 79.26790465 | 67.74157238 | 72.86942046 | 70.53318389 | 37.32011117 | 73.33275817 |
| ENSMUSG000000064361  | 1.09205386   | 1.676277331  | 2.090972322 | 0.14817174  | 0.999071534 | mt-Tr         | mt-Tr         |           | 1.263240604 | 0.296450222 | 2.625488593 | 4.717983245 | 1.111843547 | 0.800383777 | 1.617882337 | 1.243484143 | 8.799689371 | 6.013024734 |
| ENSMUSG000000028986  | 0.349845594  | 4.965488427  | 2.089511769 | 0.148313462 | 0.999071534 | Klh7          | Klh7          | KLHL7     | 26.38769261 | 30.00076247 | 22.8215547  | 27.75284262 | 35.18657814 | 28.45000516 | 34.6873973  | 44.14368708 | 30.17036356 | 28.43114956 |
| ENSMUSG000000039155  | -0.827559385 | 1.083033314  | 2.089401363 | 0.148324181 | 0.999071534 | Cdh26         | Cdh26         | CDH26     | 3.017741442 | 1.363671021 | 3.164050356 | 2.497755836 | 3.139322957 | 1.673529715 | 0.906014109 | 0.345412262 | 1.964216377 | 1.895409971 |
| ENSMUSG000000022351  | 0.326447914  | 6.853426423  | 2.086892102 | 0.148568041 | 0.999071534 | Sqle          | Sqle          | SQLE      | 113.5512943 | 81.16807079 | 101.7881732 | 120.3779549 | 113.9966649 | 152.3639662 | 135.2549634 | 103.9690909 | 112.1960395 | 118.1690078 |
| ENSMUSG000000026223  | -0.667285228 | 6.999632041  | 2.085902761 | 0.148664314 | 0.999071534 | Itm2c         | Itm2c         | ITM2C     | 243.0334562 | 289.5132868 | 77.08165229 | 86.38072265 | 126.357749  | 213.0476089 | 170.9130901 | 55.12779701 | 21.37067419 | 53.46363296 |
| ENSMUSG000000082693  | -1.749000751 | 0.522273845  | 2.083573109 | 0.14889129  | 0.999071534 | Gm15190       | Gm15190       |           | 4.421342113 | 3.972432975 | 0           | 0.971349492 | 1.046440986 | 2.110102684 | 1.100159989 | 0           | 0           | 0           |
| ENSMUSG000000026204  | -0.803080425 | 1.372873281  | 2.083228549 | 0.148924893 | 0.999071534 | Ptprn         | Ptprn         | PTPRN     | 4.912602348 | 5.632554219 | 2.490848153 | 1.665170557 | 1.569661478 | 3.565345915 | 2.070889391 | 1.657978857 | 0.707117896 | 1.045743432 |
| ENSMUSG000000019846  | -0.369276048 | 5.821240563  | 2.082451609 | 0.149000696 | 0.999071534 | Lama4         | Lama4         | LAMA4     | 52.91574529 | 100.9116556 | 51.83656966 | 66.53744018 | 57.5542542  | 76.54579392 | 46.53029601 | 39.10066805 | 47.0626244  | 31.37230296 |
| ENSMUSG000000006462  | 0.973606583  | 0.301724976  | 2.082397776 | 0.149005952 | 0.999071534 | A530013C23Rik | A530013C23Rik |           | 0.912340436 | 1.304380977 | 0.673202203 | 0.346910533 | 0.654025616 | 0.582097292 | 0.841298815 | 1.72706131  | 1.649941757 | 2.0261279   |
| ENSMUSG000000002617  | 0.650427212  | 1.89785402   | 2.082236832 | 0.149021659 | 0.999071534 | Zfp40         | Zfp40         |           | 2.877381375 | 2.786632087 | 3.837252559 | 1.873316877 | 3.204725518 | 4.074681045 | 3.365195261 | 4.559441858 | 2.199922343 | 7.189486096 |
| ENSMUSG000000015880  | 0.344453029  | 5.655096602  | 2.08056353  | 0.149185091 | 0.999071534 | Ncapg         | Ncapg         | NCAPG     | 46.81008237 | 30.00076247 | 49.34572151 | 50.8570841  | 52.4528544  | 74.29016691 | 71.63982988 | 36.26828751 | 45.96266323 | 46.60094169 |
| ENSMUSG000000052798  | 0.32429633   | 5.759753632  | 2.080209011 | 0.149219743 | 0.999071534 | Nup107        | Nup107        | NUP107    | 56.0738468  | 37.47130807 | 52.37513143 | 41.55988182 | 62.52484889 | 91.09822623 | 58.24376413 | 43.03836784 | 53.42668547 | 48.69242856 |
| ENSMUSG000000075702  | -0.389854334 | 6.626796066  | 2.078962475 | 0.149341656 | 0.999071534 | Selm          | Selm          | SELM      | 105.4104104 | 80.99020066 | 143.59403   | 138.7642131 | 109.353083  | 57.04553463 | 68.66292638 | 91.18883716 | 75.26877158 | 111.8945472 |
| ENSMUSG000000028581  | -0.570188246 | 6.568200155  | 2.077241779 | 0.149510127 | 0.999071534 | Laptn5        | Laptn5        | LAPTM5    | 182.1873671 | 184.8663585 | 67.92610232 | 77.3610488  | 79.66032002 | 186.48942   | 98.17310021 | 42.90020294 | 27.73473525 | 42.41796796 |
| ENSMUSG000000093424  | 0.721816043  | 1.906186327  | 2.076997295 | 0.149534082 | 0.999071534 | 6330562C20Rik | 6330562C20Rik |           | 2.17558104  | 1.126510844 | 4.443134543 | 4.02416218  | 2.289089656 | 3.274297269 | 3.559341141 | 3.108710358 | 4.478413341 | 6.928050238 |
| ENSMUSG0000000045282 | -0.84349156  | 0.567087054  | 2.076978152 | 0.149535958 | 0.999071534 | Tmem86b       | Tmem86b       | TMEM86B   | 1.333420637 | 1.660121243 | 2.692808814 | 1.318260024 | 1.962076848 | 1.819054038 | 1.164875283 | 0.621742072 | 0.549980586 | 0.653589645 |
| ENSMUSG000000042408  | 0.545870244  | 4.501944373  | 2.075383684 | 0.149692293 | 0.999071534 | Zmym6         | Zmym6         | ZMYM6     | 14.31672684 | 21.87802639 | 22.14835249 | 8.325852786 | 29.30034759 | 21.02826468 | 13.13720458 | 47.80505706 | 13.27810271 | 33.65986672 |
| ENSMUSG0000000022960 | 0.431307015  | 3.60348698   | 2.075057193 | 0.149724327 | 0.999071534 | Donson        | Donson        | DONSON    | 10.38664496 | 10.0200175  | 9.492151068 | 12.97445392 | 10.07199449 | 21.24655116 | 11.84289871 | 11.605852   | 12.72812213 | 10.1306395  |
| ENSMUSG000000000838  | 0.302657119  | 6.368193983  | 2.075022493 | 0.149727733 | 0.999071534 | Fmr1          | Fmr1          | FMR1      | 61.47770938 | 76.12841702 | 75.465967   | 76.18155299 | 94.11428614 | 111.4716315 | 98.2378155  | 76.12886254 | 72.75457462 | 84.57450007 |
| ENSMUSG000000039477  | -0.334745953 | 6.172170002  | 2.073874979 | 0.149840389 | 0.999071534 | Tnrc18        | Tnrc18        | TNRC18    | 77.75947716 | 101.1488158 | 72.77315819 | 71.94924449 | 94.24509126 | 96.77367482 | 41.15892665 | 66.59548411 | 41.24854393 | 69.14978445 |
| ENSMUSG000000027999  | -0.398703801 | 4.208706743  | 2.073667329 | 0.149860785 | 0.999071534 | Pla2g12a      | Pla2g12a      | PLA2G12A  | 21.61545033 | 16.12689208 | 32.4483462  | 21.50845303 | 16.3506404  | 21.97417278 | 14.04321869 | 13.12566595 | 13.43524002 | 14.70576701 |
| ENSMUSG000000046179  | 0.451526382  | 3.896141115  | 2.073064664 | 0.149919999 | 0.999071534 | E2f8          | E2f8          | E2F8      | 12.28150587 | 7.114805329 | 15.34901024 | 14.15394974 | 15.69661478 | 27.64962138 | 15.20809397 | 11.4676871  | 16.18514295 | 13.13715187 |
| ENSMUSG000000030521  | 0.372179399  | 5.070623272  | 2.07244038  | 0.149981365 | 0.999071534 | Mphosph10     | Mphosph10     | MPHOSPH10 | 33.40569597 | 25.31684896 | 33.66011017 | 26.78149313 | 32.57047567 | 44.74872934 | 60.76766058 | 22.93537419 | 27.8133039  | 28.23507267 |
| ENSMUSG0000000032359 | -0.414079648 | 4.552504848  | 2.072117027 | 0.150013161 | 0.999071534 | Ctsh          | Ctsh          | CTSH      | 38.87973858 | 33.43958505 | 20.80194809 | 20.1208109  | 25.96481695 | 32.59744836 | 26.14497857 | 15.75079915 | 9.899650542 | 15.94758734 |
| ENSMUSG000000034684  | -0.361171055 | 6.212203989  | 2.069067916 | 0.150313362 | 0.999071534 | Sema3f        | Sema3f        | SEMA3F    | 98.25204696 | 122.6118118 | 76.61041075 | 60.98687166 | 75.67076377 | 108.1973342 | 62.57968879 | 51.39734458 | 33.78452169 | 69.14978445 |
| ENSMUSG000000021965  | 0.4671081    | 3.911188234  | 2.06814882  | 0.150403985 | 0.999071534 | Ska3          | Ska3          | SKA3      | 16.07122768 | 7.470545595 | 15.887572   | 10.5460802  | 15.23879685 | 25.03018356 | 25.30367975 | 10.0169556  | 11.47102364 | 13.85610048 |
| ENSMUSG000000097058  | 1.828551441  | -0.353176213 | 2.067944204 | 0.150424169 | 0.999071534 | 4930556M19Rik | 4930556M19Rik |           | 0           | 0.296450222 | 0.673202203 | 0.138764213 | 0.457817931 | 0.291048646 | 0           | 1.036236786 | 3.221314859 | 0           |
| ENSMUSG000000097392  | 0.564809716  | 2.942264212  | 2.067165757 | 0.150500984 | 0.999071534 | D930016D06Rik | D930016D06Rik |           | 6.035482885 | 4.98036373  | 7.607184899 | 7.215739081 | 5.690022859 | 6.621356699 | 5.694945826 | 9.80970824  | 12.49241616 | 7.124127131 |
| ENSMUSG000000052291  | 0.826132396  | 1.545172145  | 2.065860828 | 0.15062985  | 0.999071534 | 5330438D12Rik | 5330438D12Rik |           | 3.298461576 | 2.01586151  | 1.077123525 | 1.80393477  | 2.289089656 | 2.328389169 | 0.970729402 | 4.214029596 | 1.964216377 | 7.646998847 |
| ENSMUSG0000000025235 | 0.59037184   | 2.383662358  | 2.064140278 | 0.150799952 | 0.999071534 | Bbs4          | Bbs4          | BBS4      | 4.210802013 | 4.328173242 | 5.722218729 | 3.191576901 | 3.662543449 | 4.074681045 | 4.918362304 | 9.257048621 | 4.871256616 | 5.882306805 |
| ENSMUSG0000000001288 | -0.336049991 | 6.75104992   | 2.06397412  | 0.150816391 | 0.999071534 | Rarg          | Rarg          | RARG      | 128.0083812 | 149.529492  | 106.3659481 | 96.30236389 | 145.8477124 | 121.6583341 | 78.17607452 | 110.6010063 | 55.23376453 | 101.8946257 |
| ENSMUSG0000000015316 | 0.811181775  | 0.987759977  | 2.062953253 | 0.150917433 | 0.999071534 | Slamf1        | Slamf1        | SLAMF1    | 1.052700503 | 1.007930755 | 1.144443746 | 1.873316877 | 1.896674286 | 1.673529715 | 0.970729402 | 2.210638477 | 3.064177549 | 3.137230296 |
| ENSMUSG000000036564  | -0.657722459 | 2.201300977  | 2.062749223 | 0.150937637 | 0.999071534 | Ndr4          | Ndr4          | NDRG4     | 3.859901845 | 6.99622524  | 8.078426441 | 3.538487434 | 5.951633105 | 2.328389169 | 1.812028217 | 4.766689215 | 4.085570065 | 3.137230296 |
| ENSMUSG000000053286  | 0.382929904  | 4.644942846  | 2.062237484 | 0.150988324 | 0.999071534 | Trmt1l        | Trmt1l        | TRMT1L    | 24.49283171 | 20.63293545 | 23.831358   | 13.8070392  | 30.1505809  | 28.88657812 | 19.47930334 | 23.55711627 | 26.2419308  | 36.86245598 |
| ENSMUSG000000049323  | -0.419581689 | 4.169599199  | 2.061944714 | 0.151017331 | 0.999071534 | Smcr8         | Smcr8         | SMCR8     | 22.87869093 | 29.52644211 | 16.15685288 | 16.79046978 | 21.19042996 | 23.93875114 | 14.62565633 | 18.51409724 | 7.071178959 | 12.1567674  |
| ENSMUSG000000020108  | -0.48724861  | 7.505704532  | 2.060947539 | 0.151116177 | 0.999071534 | Ddit4         | Ddit4         | DDIT4     | 211.1717209 | 310.9169929 | 193.8149144 | 159.3706987 | 230.2824194 | 81.20257226 | 134.0900881 | 276.8133867 | 87.1326385  | 139.933543  |
| ENSMUSG000000081604  | 0.413224483  | 8.97170975   | 2.060907173 | 0.15112018  | 0.999071534 | Gm11518       | Gm11518       |           | 404.5177133 | 406.8482847 | 511.8356353 | 421.0106225 | 490.8462248 | 350.6408564 | 765.4524913 | 651.1021138 | 440.6915864 | 514.9632813 |

|                     |              |              |             |             |             |               |               |          |             |             |             |             |             |             |             |             |             |             |
|---------------------|--------------|--------------|-------------|-------------|-------------|---------------|---------------|----------|-------------|-------------|-------------|-------------|-------------|-------------|-------------|-------------|-------------|-------------|
| ENSMUSG00000027624  | -0.391539248 | 5.619068118  | 2.06048215  | 0.151162334 | 0.999071534 | Epb4.1l1      | Epb41l1       | EPB41L1  | 63.30239025 | 78.20356857 | 50.15356415 | 33.16464693 | 66.2527949  | 67.74157238 | 39.08803726 | 43.59102746 | 16.34228026 | 46.47022376 |
| ENSMUSG00000036192  | 0.839335899  | 2.804545703  | 2.059641143 | 0.151245785 | 0.999071534 | Rorb          | Rorb          | RORB     | 3.017741442 | 3.083082309 | 5.92417939  | 9.366584384 | 3.793348573 | 3.34705943  | 3.559341141 | 2.486968286 | 17.99222202 | 11.63389568 |
| ENSMUSG00000028771  | 0.325979164  | 6.338315169  | 2.059168508 | 0.151292707 | 0.999071534 | Ptpn12        | Ptpn12        | PTPN12   | 58.95122818 | 72.68959444 | 90.94961768 | 69.31272444 | 80.05273539 | 85.56830195 | 77.01119924 | 90.35984773 | 93.49669957 | 80.06473152 |
| ENSMUSG000000097793 | 0.847202583  | 1.052787162  | 2.058798614 | 0.15132944  | 0.999071534 | Gm17259       | Gm17259       |          | 1.965040939 | 0.711480533 | 1.817645949 | 1.457024238 | 1.308051232 | 1.8918162   | 1.423736457 | 2.832380548 | 4.32127603  | 1.045743432 |
| ENSMUSG00000002068  | 0.623560841  | 3.808929541  | 2.057896797 | 0.151419039 | 0.999071534 | Ccne1         | Ccne1         | CCNE1    | 13.82546661 | 8.834216617 | 10.77123525 | 12.48877918 | 10.7260201  | 31.65154026 | 28.7983056  | 3.45412262  | 12.72812213 | 7.97379367  |
| ENSMUSG00000038642  | -0.359080201 | 9.046239248  | 2.056693348 | 0.151538701 | 0.999071534 | Ctss          | Ctss          | CTSS     | 666.0786983 | 585.4298985 | 605.2087809 | 641.437575  | 581.7557854 | 584.9350165 | 422.720297  | 533.3165325 | 299.8179879 | 427.5129868 |
| ENSMUSG00000019961  | 0.384784712  | 8.233939684  | 2.055894293 | 0.151618211 | 0.999071534 | Tmpo          | Tmpo          | TMPO     | 259.455584  | 201.9418913 | 272.6468924 | 271.7697114 | 349.7074969 | 414.5260342 | 418.8373794 | 286.0013529 | 274.2046063 | 263.9194987 |
| ENSMUSG00000037411  | -0.567942207 | 6.219087148  | 2.053859484 | 0.1518209   | 0.999071534 | Serpine1      | Serpine1      | SERPINE1 | 78.11037733 | 220.262515  | 74.1195626  | 44.05763766 | 47.6784674  | 67.59604805 | 90.01897323 | 76.68152216 | 26.00622484 | 34.83632808 |
| ENSMUSG00000066306  | -0.43890551  | 5.897530446  | 2.053017605 | 0.15190485  | 0.999071534 | Numa1         | Numa1         | NUMA1    | 83.65459998 | 108.204331  | 47.25879468 | 46.6247756  | 72.13902544 | 108.6339072 | 47.04801836 | 39.79149258 | 20.50641898 | 43.39835243 |
| ENSMUSG00000089675  | 1.636226888  | 2.487361737  | 2.052576667 | 0.15194884  | 0.999071534 | Ugt1a8        | Ugt1a8        | UGT1A8   | 4.772242281 | 1.541541155 | 7.607184899 | 0           | 0           | 2.764962138 | 5.047792891 | 15.12905707 | 0           | 17.32012559 |
| ENSMUSG00000069808  | 0.499669661  | 3.356103622  | 2.052428074 | 0.151963668 | 0.999071534 | Fam57a        | Fam57a        | FAM57A   | 10.10592483 | 8.182026128 | 7.135943356 | 7.84017804  | 10.33360473 | 19.35473496 | 15.46695514 | 6.700997882 | 10.37106247 | 6.53589645  |
| ENSMUSG00000047260  | 0.330235291  | 5.922358993  | 2.049878433 | 0.152218344 | 0.999071534 | Emc6          | Emc6          | EMC6     | 68.77643287 | 42.21451162 | 56.07747354 | 53.28545783 | 58.27368238 | 66.35909131 | 98.36724609 | 56.71669342 | 50.36250792 | 54.18258157 |
| ENSMUSG00000094935  | -0.606953602 | 2.156074769  | 2.049815042 | 0.152224682 | 0.999071534 | Gm9726        | Gm9726        | LYSMD1   | 4.35116208  | 5.098943819 | 3.567971678 | 8.464616999 | 5.363010051 | 4.875064822 | 2.912188207 | 2.763298096 | 2.042785033 | 4.313691657 |
| ENSMUSG00000025473  | -0.463595083 | 6.292809923  | 2.047958626 | 0.152410426 | 0.999071534 | Adam8         | Adam8         | ADAM8    | 111.9371535 | 181.3682458 | 53.38493473 | 50.8570841  | 77.56743805 | 74.58121556 | 87.75393796 | 65.97374204 | 29.69895163 | 66.4700669  |
| ENSMUSG00000014852  | 0.880001956  | 4.031703376  | 2.047790644 | 0.152427247 | 0.999071534 | Adamts13      | Adamts13      | ADAMTS13 | 4.842422314 | 3.913142931 | 17.23397641 | 22.82671305 | 9.41796887  | 3.929156722 | 3.947632902 | 20.310241   | 40.0700141  | 24.05209894 |
| ENSMUSG00000051735  | -0.599863757 | 2.492634638  | 2.047688894 | 0.152437436 | 0.999071534 | Rinl          | Rinl          | RINL     | 10.2462849  | 7.944865951 | 6.530061373 | 4.093544286 | 5.75542542  | 7.203453991 | 4.206494076 | 2.556050739 | 4.792687961 | 2.548999616 |
| ENSMUSG00000055541  | -0.545574932 | 3.935403683  | 2.047640735 | 0.152442259 | 0.999071534 | Lair1         | Lair1         | LAIR2    | 30.80903472 | 21.7594463  | 10.16535327 | 15.8885024  | 15.23879685 | 24.9574214  | 16.8906916  | 5.388431287 | 6.678335683 | 8.823460208 |
| ENSMUSG00000046020  | -0.342464963 | 5.265606872  | 2.04643699  | 0.152562866 | 0.999071534 | Pofut1        | Pofut1        | POFUT1   | 53.12628539 | 56.68128245 | 36.82416053 | 38.57645124 | 37.86808316 | 54.35333466 | 36.6935714  | 29.29095982 | 17.75651605 | 30.98014918 |
| ENSMUSG00000061578  | 1.809768792  | -0.835964819 | 2.046076341 | 0.152599022 | 0.999071534 | Ksr2          | Ksr2          | KSR2     | 0           | 0.059290044 | 0.807842644 | 0           | 0.130805123 | 0.800383777 | 0           | 0.207247357 | 1.178529826 | 1.045743432 |
| ENSMUSG00000034993  | -0.411568091 | 7.925413191  | 2.045544007 | 0.152652407 | 0.999071534 | Vat1          | Vat1          | VAT1     | 260.6486446 | 393.2115745 | 213.9436602 | 208.0769375 | 372.663796  | 264.6359815 | 171.107236  | 272.5302747 | 112.981726  | 204.7042768 |
| ENSMUSG00000072847  | 0.684791283  | 2.116525175  | 2.044993266 | 0.15270766  | 0.999071534 | A530017D24Rik | A530017D24Rik |          | 1.754500839 | 2.193731643 | 3.164050356 | 3.677251647 | 5.951633105 | 3.929156722 | 2.718042326 | 5.941090906 | 4.00700141  | 8.169870563 |
| ENSMUSG00000021621  | 0.366011552  | 4.859874346  | 2.044656619 | 0.152741445 | 0.999071534 | Zcchc9        | Zcchc9        | ZCCHC9   | 21.9663505  | 20.51435536 | 31.70782378 | 25.32446889 | 31.52403469 | 25.68504302 | 35.722842   | 33.43590696 | 33.54881573 | 25.29391926 |
| ENSMUSG00000040247  | -0.797996283 | 0.861981314  | 2.042526599 | 0.152955407 | 0.999071534 | Tbc1d10c      | Tbc1d10c      | TBC1D10C | 2.105401006 | 2.786632087 | 2.827449254 | 2.081463196 | 1.24264867  | 2.255627007 | 0.841298815 | 0.552659619 | 0.942823861 | 1.503256184 |
| ENSMUSG00000021007  | 0.617326414  | 2.793683463  | 2.039896101 | 0.153220111 | 0.999071534 | Spata7        | Spata7        | SPATA7   | 3.509001677 | 4.861783641 | 9.76143195  | 3.538487434 | 6.278645913 | 4.947826984 | 7.183397576 | 9.257048621 | 10.76390575 | 5.94766577  |
| ENSMUSG00000031561  | 1.039716874  | 0.024611905  | 2.0396752   | 0.153242364 | 0.999071534 | Tenm3         | Tenm3         | TENM3    | 0.561440268 | 0.592900444 | 0.673202203 | 0.901967385 | 0.261610246 | 0.9459081   | 2.070889391 | 0.345412262 | 1.414235792 | 0.915025503 |
| ENSMUSG00000063415  | -0.693791944 | 3.430542254  | 2.039532402 | 0.153256751 | 0.999071534 | Cyp26b1       | Cyp26b1       | CYP26B1  | 10.456825   | 30.29721269 | 7.337904017 | 8.603381212 | 11.96866877 | 6.403070214 | 7.44225875  | 18.30684988 | 2.985608894 | 4.182973728 |
| ENSMUSG00000027301  | 1.450402062  | -0.089284631 | 2.039039341 | 0.153306438 | 0.999071534 | Oxt           | Oxt           | OXT      | 0.070180034 | 0.118580089 | 0.673202203 | 1.318260024 | 0.065402562 | 0.291048646 | 0.19414588  | 0.552659619 | 2.828471584 | 1.503256184 |
| ENSMUSG00000022197  | 0.654377718  | 2.035563013  | 2.038535006 | 0.153357281 | 0.999071534 | Pdxd2         | Pdxd2         | PDXD2    | 2.807201342 | 3.320242487 | 3.971893    | 3.260959008 | 2.616102464 | 4.147443207 | 2.006174098 | 4.144947144 | 5.185531236 | 7.516280918 |
| ENSMUSG00000046814  | -0.422782541 | 4.927566583  | 2.037552394 | 0.153456393 | 0.999071534 | Gchfr         | Gchfr         | GCHFR    | 43.79234093 | 22.94524719 | 28.81305431 | 52.9385473  | 30.28138602 | 19.2819728  | 33.91081378 | 17.13244819 | 23.88487115 | 28.82330335 |
| ENSMUSG00000001419  | -0.341873532 | 6.048588338  | 2.037414122 | 0.153470346 | 0.999071534 | Mef2d         | Mef2d         | MEF2D    | 72.63633472 | 103.6982877 | 72.03263577 | 60.08490427 | 76.1285817  | 81.71190739 | 37.85844669 | 72.2602452  | 37.32011117 | 57.51588876 |
| ENSMUSG00000042659  | -0.40363554  | 4.298051025  | 2.036654611 | 0.153547013 | 0.999071534 | Arrdc4        | Arrdc4        | ARRDC4   | 33.40569597 | 31.89804389 | 14.8777687  | 18.17811192 | 17.65869163 | 19.35473496 | 14.81980221 | 19.20492177 | 12.64955347 | 15.55543355 |
| ENSMUSG00000031803  | -0.692860478 | 3.464435041  | 2.036431339 | 0.153569559 | 0.999071534 | B3gnt3        | B3gnt3        | B3GNT3   | 19.29950922 | 26.14690958 | 4.241173882 | 5.966861163 | 15.10799173 | 12.36956746 | 13.39606575 | 8.428059192 | 2.042785033 | 5.751588876 |
| ENSMUSG00000029591  | 0.502693632  | 3.531075609  | 2.035515329 | 0.153662097 | 0.999071534 | Ung           | Ung           | UNG      | 11.43934547 | 5.751134307 | 10.03071283 | 9.64411281  | 12.29568158 | 20.8099782  | 17.02012219 | 5.802926001 | 10.6853709  | 11.89533154 |
| ENSMUSG00000001518  | 0.383693254  | 3.835952425  | 2.034424285 | 0.153772399 | 0.999071534 | Itfg2         | Itfg2         | ITFG2    | 14.66762701 | 12.03587901 | 12.5888812  | 11.17051915 | 13.40752513 | 18.918162   | 13.00777399 | 13.81649048 | 13.1209654  | 18.82338178 |
| ENSMUSG00000027907  | 0.543555559  | 8.484483255  | 2.033981191 | 0.153817221 | 0.999071534 | S100a11       | S100a11       | S100A11  | 134.9562045 | 228.5631212 | 451.3147572 | 335.0461925 | 355.2667146 | 193.4745875 | 322.0233004 | 584.9902069 | 475.9689126 | 384.2453523 |
| ENSMUSG00000017466  | -0.370260542 | 9.41725794   | 2.033973741 | 0.153817975 | 0.999071534 | Timp2         | Timp2         | TIMP2    | 780.472153  | 1000.104469 | 613.489168  | 822.455491  | 783.8497007 | 788.0142093 | 641.457989  | 596.8033062 | 365.8156581 | 544.5708923 |
| ENSMUSG00000029103  | -0.322457359 | 5.412512191  | 2.03233564  | 0.153983808 | 0.999071534 | Lrpap1        | Lrpap1        | LRPAP1   | 53.12628539 | 59.64578467 | 40.52677265 | 46.69415771 | 45.19317006 | 48.31407525 | 48.14817835 | 34.95572091 | 20.97783091 | 33.72522568 |
| ENSMUSG00000038497  | -0.318563621 | 5.502712335  | 2.032080942 | 0.15400961  | 0.999071534 | Tmco3         | Tmco3         | TMCO3    | 43.02036056 | 65.98981943 | 45.91239027 | 51.62028727 | 53.82630819 | 44.09386988 | 33.13423026 | 51.19009722 | 29.30610835 | 37.05853287 |
| ENSMUSG00000028322  | 0.381330748  | 4.682495052  | 2.031640566 | 0.154054235 | 0.999071534 | Exosc3        | Exosc3        | EXOSC3   | 24.21211157 | 19.50642461 | 27.60129034 | 18.87193298 | 25.24538878 | 36.3083186  | 36.62885611 | 16.64887103 | 29.69895163 | 20.19592003 |

|                     |              |              |             |             |             |             |           |                 |             |             |             |             |             |             |             |             |             |             |
|---------------------|--------------|--------------|-------------|-------------|-------------|-------------|-----------|-----------------|-------------|-------------|-------------|-------------|-------------|-------------|-------------|-------------|-------------|-------------|
| ENSMUSG00000033454  | 0.300915186  | 5.134823562  | 2.030853742 | 0.154134003 | 0.999071534 | Zbtb1       | Zbtb1     | ZBTB1           | 35.37073691 | 31.48301358 | 30.56338004 | 30.59750899 | 34.99037045 | 48.89617254 | 36.95243258 | 28.32380548 | 33.39167842 | 40.19576317 |
| ENSMUSG00000044763  | 0.461158761  | 3.963840219  | 2.029839205 | 0.154236925 | 0.999071534 | Trmt10c     | Trmt10c   | TRMT10C         | 12.21132584 | 17.84630337 | 12.99280253 | 8.533999106 | 16.41604296 | 19.64578361 | 29.96318088 | 12.02034672 | 8.878258026 | 17.77763835 |
| ENSMUSG000000064125 | -0.964378556 | 0.900226377  | 2.029066368 | 0.154315379 | 0.999071534 | BC068157    | Prr36     | PRR36           | 1.684320805 | 2.786632087 | 1.817645949 | 1.318260024 | 4.316569065 | 2.473913492 | 0.711868228 | 1.4507315   | 0           | 1.372538255 |
| ENSMUSG00000036560  | -1.409362075 | -0.312446156 | 2.028362998 | 0.154386821 | 0.999071534 | Lgi4        | Lgi4      | LGI4            | 1.473780704 | 0.355740266 | 1.817645949 | 0.971349492 | 0.457817931 | 0.727621615 | 0.064715293 | 0.069082452 | 0.864255206 | 0           |
| ENSMUSG00000004558  | -0.85458379  | 0.898733797  | 2.026834753 | 0.154542176 | 0.999071534 | Ndrg2       | Ndrgr2    | NDRG2           | 4.280982046 | 2.54947191  | 2.356207712 | 0.832585279 | 1.63506404  | 1.236956746 | 1.035444696 | 2.210638477 | 0.392843275 | 1.111102397 |
| ENSMUSG00000038179  | -1.317664104 | -0.109865906 | 2.026226731 | 0.154604034 | 0.999071534 | Slamf7      | Slamf7    | SLAMF7          | 1.824680872 | 2.727342043 | 0.471241542 | 0.069382107 | 0.784830739 | 1.382481069 | 0.258861174 | 0.069082452 | 0.392843275 | 0.196076894 |
| ENSMUSG00000037572  | 0.451376114  | 3.943150392  | 2.025295727 | 0.154698806 | 0.999071534 | Wdhd1       | Wdhd1     | WDHD1           | 20.14166963 | 10.13859759 | 12.2522801  | 11.10113705 | 13.53833025 | 29.25038893 | 24.33295035 | 11.12227484 | 10.29249382 | 13.20251083 |
| ENSMUSG000000211057 | 1.152897996  | -0.19221315  | 2.024013244 | 0.154829465 | 0.999071534 | Akap5       | Akap5     | AKAP5           | 0.140360067 | 0.177870133 | 1.211763966 | 0.277528426 | 0.588623054 | 0.509335131 | 0.647152935 | 1.72706131  | 0.707117896 | 1.30717929  |
| ENSMUSG00000028664  | -0.318940551 | 5.09916404   | 2.023322361 | 0.154899903 | 0.999071534 | Ephb2       | Ephb2     | EPHB2           | 35.51109697 | 51.28588841 | 38.30520537 | 31.08318373 | 41.13821124 | 44.8214915  | 30.86919499 | 25.69867229 | 23.49202787 | 24.50961169 |
| ENSMUSG00000020528  | 0.312457588  | 5.068607967  | 2.02243792  | 0.154990129 | 0.999071534 | Prpsap2     | Prpsap2   | PRPSAP2         | 29.05453389 | 28.22206114 | 32.58298665 | 31.01380163 | 33.81312435 | 31.21496729 | 36.7582867  | 35.57746298 | 32.76312918 | 40.26112213 |
| ENSMUSG00000026170  | -0.615399009 | 2.144174269  | 2.021323208 | 0.155103931 | 0.999071534 | Cyp27a1     | Cyp27a1   | CYP27A1         | 4.56170218  | 3.320242487 | 7.943786    | 5.342422204 | 5.690022859 | 6.039259406 | 2.588611739 | 2.417885834 | 3.221314859 | 2.418281687 |
| ENSMUSG00000016427  | 0.37603089   | 6.341491814  | 2.021052422 | 0.155131159 | 0.999071534 | Ndufa1      | Ndufa1    | NDUFA1          | 59.79338858 | 60.00152494 | 74.99472546 | 83.6748205  | 86.26597875 | 52.24323197 | 103.415039  | 90.42893018 | 91.92532646 | 90.52216584 |
| ENSMUSG00000059323  | -0.308497038 | 6.655553591  | 2.019074771 | 0.155333764 | 0.999071534 | Tonsl       | Tonsl     | TONSL           | 122.1834384 | 91.54382856 | 135.9195249 | 114.2723295 | 113.9312623 | 105.432372  | 90.98970263 | 80.06656232 | 61.5978256  | 100.9796002 |
| ENSMUSG00000036533  | 0.405815327  | 5.721295977  | 2.018950185 | 0.155346511 | 0.999071534 | Cdc42ep3    | Cdc42ep3  | CDCA2EP3        | 26.80877281 | 47.49132557 | 60.11695677 | 44.82084083 | 55.46137223 | 40.091951   | 45.36542073 | 83.03710778 | 61.04784501 | 51.43750507 |
| ENSMUSG00000037533  | 0.338498038  | 4.545066725  | 2.018930251 | 0.15534855  | 0.999071534 | Rapgef6     | Rapgef6   | CTC-432M15.3    | 22.3874307  | 24.60536843 | 18.98430214 | 17.27614453 | 23.54492217 | 38.27289696 | 20.90303979 | 24.80060041 | 19.09218319 | 24.50961169 |
| ENSMUSG00000062981  | 0.364219621  | 6.351786257  | 2.018411425 | 0.155401645 | 0.999071534 | Mrp42       | Mrp42     | MIRPL42         | 67.51319227 | 50.69298797 | 76.07184899 | 87.21330793 | 87.44322485 | 65.63146969 | 118.1054106 | 77.30326423 | 87.21120716 | 86.14311522 |
| ENSMUSG00000047003  | -0.648232934 | 2.409453182  | 2.017977882 | 0.155446028 | 0.999071534 | Zfp41       | Zfp41     | ZFP41           | 8.772504193 | 6.284744707 | 3.567971678 | 7.978942253 | 6.14784079  | 9.386318836 | 3.882917609 | 1.796143762 | 1.885647722 | 3.790819941 |
| ENSMUSG00000031779  | -0.931822617 | 1.387953776  | 2.017680864 | 0.155476443 | 0.999071534 | Cc12        | Cc12      | CCL22           | 5.824942784 | 4.446753331 | 2.423527932 | 2.289609516 | 1.962076848 | 4.220205368 | 1.423736457 | 1.4507315   | 0           | 1.830051006 |
| ENSMUSG00000042156  | -0.76997316  | 1.606419701  | 2.017348351 | 0.1555105   | 0.999071534 | Dzip1       | Dzip1     | DZIP1           | 1.122880537 | 2.786632087 | 5.452937848 | 6.383153803 | 3.008517833 | 2.764962138 | 2.006174098 | 0.967154334 | 2.121353688 | 2.548999616 |
| ENSMUSG00000039982  | -0.352203749 | 5.067143185  | 2.017085948 | 0.155537383 | 0.999071534 | Dtx4        | Dtx4      | DTX4            | 38.66919848 | 50.45582779 | 23.62939734 | 35.10734591 | 47.15524691 | 43.58453475 | 22.71506801 | 31.50159829 | 18.46363395 | 28.75794438 |
| ENSMUSG00000032834  | 0.342944971  | 5.121438508  | 2.016071097 | 0.155641401 | 0.999071534 | Pwp2        | Pwp2      | CH507-9B2.5     | 35.44091694 | 31.18656336 | 37.02612119 | 22.06350988 | 33.74772178 | 64.61279943 | 40.7059196  | 24.3861057  | 27.73473525 | 35.48991773 |
| ENSMUSG00000024483  | 0.445947019  | 5.792452643  | 2.015565299 | 0.155693273 | 0.999071534 | Ankhd1      | Ankhd1    | ANKHD1-E1F4EBP3 | 36.07253724 | 44.34895322 | 61.73264205 | 51.13461253 | 48.98651864 | 53.6984752  | 22.00319978 | 67.21722618 | 75.26877158 | 80.52224427 |
| ENSMUSG00000033191  | -0.433431873 | 4.77163267   | 2.014917282 | 0.155759759 | 0.999071534 | Tie1        | Tie1      | TIE1            | 31.30029496 | 42.80741206 | 37.02612119 | 28.93233843 | 22.04066326 | 46.13121041 | 26.14497857 | 15.68171669 | 9.192532646 | 21.04558657 |
| ENSMUSG00000093859  | 1.434381274  | -0.645414654 | 2.0148174   | 0.155770009 | 0.999071534 | Gm7882      | Gm7882    |                 | 0.070180034 | 0.296450222 | 0.875162864 | 0.138764213 | 0.065402562 | 0.072762162 | 0.323576467 | 1.036236786 | 1.335667137 | 0.653589645 |
| ENSMUSG00000008845  | 1.134316838  | 0.553391595  | 2.013556512 | 0.155899477 | 0.999071534 | Cd163       | Cd163     | CD163           | 1.894860906 | 0           | 0.134640441 | 1.318260024 | 0.981038424 | 3.492583753 | 1.423736457 | 1.312566595 | 1.021392516 | 2.0261279   |
| ENSMUSG000000211091 | -0.7275546   | 3.669717135  | 2.013404765 | 0.155915067 | 0.999071534 | Serpina3n   | Serpina3n | SERPINA3        | 6.246022985 | 39.66503971 | 14.74312825 | 9.64411281  | 11.44544828 | 15.35281608 | 8.154126978 | 14.85272726 | 1.257098482 | 8.431306421 |
| ENSMUSG00000020354  | 1.796348018  | -0.670322813 | 2.013380077 | 0.155917603 | 0.999071534 | Sgcd        | Sgcd      | SGCD            | 0.421080201 | 0.415030311 | 0           | 0.277528426 | 0.065402562 | 0           | 1.553167044 | 0.345412262 | 1.649941757 | 0           |
| ENSMUSG00000036790  | 1.333923943  | -0.146629882 | 2.01180787  | 0.15607923  | 0.999071534 | Slitrk2     | Slitrk2   | SLITRK2         | 0.912340436 | 0.177870133 | 0.740522424 | 0.485674746 | 0           | 0.654859454 | 0.258861174 | 0.345412262 | 2.121353688 | 1.764692042 |
| ENSMUSG00000006221  | -1.734537769 | -0.806600952 | 2.01091948  | 0.156170642 | 0.999071534 | Hspb7       | Hspb7     | HSPB7           | 1.684320805 | 0.355740266 | 1.346404407 | 0           | 0.130805123 | 0.363810808 | 0.453007054 | 0           | 0.15713731  | 0           |
| ENSMUSG00000005142  | -0.452613151 | 6.406269402  | 2.009950493 | 0.156270418 | 0.999071534 | Man2b1      | Man2b1    | CTD-2192J16.24  | 130.1137822 | 151.6046435 | 71.76335488 | 63.27648117 | 95.029922   | 153.16435   | 78.62908158 | 56.92394077 | 29.30610835 | 49.21530027 |
| ENSMUSG00000022620  | -0.310664141 | 6.078301506  | 2.008982331 | 0.15637018  | 0.999071534 | Arsa        | Arsa      | ARSA            | 71.37309411 | 89.88370732 | 71.1574729  | 70.35345604 | 85.41574544 | 73.78083178 | 43.74753839 | 73.7109767  | 41.24854393 | 61.11063181 |
| ENSMUSG00000021282  | 0.35722637   | 8.600331564  | 2.008957282 | 0.156372762 | 0.999071534 | Elf5        | Elf5      | EIF5            | 304.8620657 | 355.8588465 | 393.9579294 | 355.0976213 | 353.7624557 | 436.2091583 | 435.3397792 | 407.7937165 | 409.4998304 | 395.4217353 |
| ENSMUSG00000030655  | 0.333614513  | 6.023946145  | 2.008399091 | 0.156430314 | 0.999071534 | Smg1        | Smg1      | SMG1            | 51.16124445 | 78.91504911 | 50.42284504 | 45.5146619  | 73.5778818  | 80.83876145 | 53.26068653 | 88.63278642 | 60.73357039 | 65.48968243 |
| ENSMUSG00000002416  | 0.371551399  | 5.78263308   | 2.008205887 | 0.15645024  | 0.999071534 | Ndufb2      | Ndufb2    | NDUFB2          | 53.96844579 | 35.04041624 | 49.81696305 | 58.90540846 | 49.96755706 | 38.78223209 | 69.24536402 | 48.77221139 | 67.56904338 | 65.68575933 |
| ENSMUSG00000026389  | -0.412920973 | 5.926663958  | 2.00800141  | 0.156471331 | 0.999071534 | Steap3      | Steap3    | STEAP3          | 66.3201317  | 90.95092812 | 37.22808185 | 62.513278   | 104.578696  | 53.91676169 | 51.90166537 | 77.37234668 | 23.25632191 | 48.36563373 |
| ENSMUSG00000037306  | -0.481906702 | 3.891688198  | 2.007415148 | 0.156531821 | 0.999071534 | Man1c1      | Man1c1    | MAN1C1          | 21.47509026 | 18.85423412 | 14.81044848 | 15.19468133 | 18.96674286 | 27.7951457  | 12.74891282 | 7.115492597 | 5.185531236 | 10.39207536 |
| ENSMUSG00000030688  | -0.521245045 | 2.883231135  | 2.005821979 | 0.156696337 | 0.999071534 | Stard10     | Stard10   | STARD10         | 11.9306057  | 6.818355107 | 6.866662475 | 8.117706466 | 10.7260201  | 5.020589145 | 6.083237587 | 4.559441858 | 4.478413341 | 8.431306421 |
| ENSMUSG00000098690  | 1.075151252  | 2.304448203  | 2.005619345 | 0.156717276 | 0.999071534 | Metaxoa_SRP | Gm27316   |                 | 2.315941107 | 0.237160178 | 6.732022034 | 5.689332737 | 0.850233301 | 1.018670261 | 1.423736457 | 6.63191543  | 9.271101302 | 11.17638293 |
| ENSMUSG00000021596  | -1.204350271 | 0.19719939   | 2.005016349 | 0.156779604 | 0.999071534 | Mctp1       | Mctp1     | MCTP1           | 1.543960738 | 1.719411288 | 1.077123525 | 1.248877918 | 1.700466601 | 1.309718907 | 0.906014109 | 0.898071881 | 0           | 0           |

|                     |              |              |             |             |             |               |               |          |             |             |             |             |             |             |             |             |             |             |
|---------------------|--------------|--------------|-------------|-------------|-------------|---------------|---------------|----------|-------------|-------------|-------------|-------------|-------------|-------------|-------------|-------------|-------------|-------------|
| ENSMUSG00000062742  | 0.645223714  | 1.814247771  | 2.004013855 | 0.156883288 | 0.999071534 | Gm5239        | Gm5239        |          | 2.315941107 | 3.142372354 | 3.096730136 | 1.80393477  | 3.400933203 | 3.34705943  | 4.335924663 | 2.832380548 | 2.749902928 | 6.666614379 |
| ENSMUSG000000020492 | 0.397323974  | 5.280970467  | 2.003435327 | 0.156943158 | 0.999071534 | Ska2          | Ska2          | SKA2     | 50.38926408 | 22.35234674 | 32.98690797 | 36.21745962 | 31.65483981 | 57.84591841 | 60.5735147  | 26.32041436 | 41.48424989 | 27.71220095 |
| ENSMUSG000000027843 | -0.580393061 | 2.51092384   | 2.003011934 | 0.156986991 | 0.999071534 | Ptpn22        | Ptpn22        | PTPN22   | 8.983044293 | 7.589125684 | 4.173853661 | 6.868828548 | 7.063476652 | 7.712789121 | 5.75966112  | 4.144947144 | 2.042785033 | 2.745076509 |
| ENSMUSG000000095524 | 1.654716523  | -0.668008438 | 2.001647352 | 0.157128356 | 0.999071534 | Gm15682       | Gm15682       |          | 0.210540101 | 0.355740266 | 0.201960661 | 0           | 0.457817931 | 0           | 1.359021163 | 0.759906976 | 0           | 1.503256184 |
| ENSMUSG000000020178 | -0.915405835 | 1.414001198  | 2.000592196 | 0.157237764 | 0.999071534 | Adora2a       | Adora2a       | ADORA2A  | 6.035482885 | 3.379532531 | 5.250977187 | 0.416292639 | 2.289089656 | 2.619437815 | 1.229590576 | 0.621742072 | 2.907040239 | 0.915025503 |
| ENSMUSG000000015217 | 0.416162773  | 5.891864027  | 1.999199436 | 0.157382312 | 0.999071534 | Hmgb3         | Hmgb3         |          | 69.68877331 | 27.92561092 | 65.30061373 | 46.83292192 | 54.153321   | 98.66549102 | 92.67230026 | 30.11994924 | 56.25515705 | 55.29368397 |
| ENSMUSG000000027636 | -1.000894073 | 0.166221138  | 1.999006745 | 0.157402322 | 0.999071534 | Sla2          | Sla2          | SLA2     | 3.017741442 | 1.600831199 | 0.403921322 | 0.693821065 | 1.177246109 | 0.727621615 | 0.647152935 | 0.828989429 | 0.549980586 | 0.392153787 |
| ENSMUSG000000023764 | 0.451829501  | 5.065457465  | 1.998607119 | 0.157443831 | 0.999071534 | Sfil          | Sfil          | SFI1     | 24.98409194 | 27.68845074 | 32.38102598 | 28.30789947 | 32.83208592 | 22.48350791 | 16.30825396 | 53.53890061 | 35.74873807 | 52.61396643 |
| ENSMUSG000000020180 | 0.363817078  | 6.951030153  | 1.998523817 | 0.157452486 | 0.999071534 | Snrpd3        | Snrpd3        | SNRPD3   | 104.2173498 | 86.68204492 | 133.7652778 | 99.07764815 | 138.1956127 | 118.9661341 | 206.830078  | 119.3744777 | 97.34656367 | 128.4303653 |
| ENSMUSG000000097434 | 1.25531788   | -0.114166326 | 1.996040872 | 0.157710684 | 0.999071534 | Gm16630       | Gm16630       |          | 0.701800335 | 0.237160178 | 0.471241542 | 0.624438959 | 0.39241537  | 0           | 0.582437641 | 1.934308667 | 0.707117896 | 2.0261279   |
| ENSMUSG000000023912 | 0.843283328  | 1.604588881  | 1.995676167 | 0.157748649 | 0.999071534 | Sk25a27       | Sk25a27       | SLC25A27 | 2.666841275 | 0.889350666 | 1.88496617  | 2.775284262 | 2.616102464 | 2.619437815 | 0.517722348 | 5.18118393  | 5.264099892 | 3.725460977 |
| ENSMUSG000000025271 | 0.718472513  | 1.545978001  | 1.995478725 | 0.157769208 | 0.999071534 | Pfkfb1        | Pfkfb1        | PFKFB1   | 2.947561409 | 2.727342043 | 2.760129034 | 0.763203172 | 1.831271725 | 3.056010784 | 5.177223478 | 1.934308667 | 2.435628308 | 4.182973728 |
| ENSMUSG000000005148 | 0.509246341  | 3.557536479  | 1.995342781 | 0.157783364 | 0.999071534 | Klf5          | Klf5          | KLF5     | 8.070703857 | 11.91729893 | 10.43463415 | 11.03175494 | 8.240722761 | 12.6606161  | 6.536244641 | 18.16868498 | 16.9708295  | 9.738485711 |
| ENSMUSG000000019774 | 0.478128312  | 3.793608988  | 1.995272574 | 0.157790676 | 0.999071534 | Mtrf1l        | Mtrf1l        | MTRF1L   | 11.9306057  | 9.130666839 | 17.70521795 | 9.505348597 | 11.38004572 | 8.731459383 | 13.20191987 | 16.09621141 | 17.12796681 | 19.47697142 |
| ENSMUSG000000031644 | 0.547871943  | 3.940120648  | 1.994422175 | 0.157879269 | 0.999071534 | Nek1          | Nek1          | NEK1     | 6.246022985 | 18.37991377 | 16.49345398 | 6.03624327  | 17.46248395 | 12.07851881 | 11.06631518 | 25.28417758 | 19.32788915 | 16.73189491 |
| ENSMUSG000000020982 | 0.421977545  | 6.296055254  | 1.994416467 | 0.157879864 | 0.999071534 | Nemf          | Nemf          | NEMF     | 55.8633067  | 54.30968068 | 93.17118495 | 74.10008979 | 69.45752041 | 69.12405345 | 48.6659007  | 73.02015218 | 118.8743752 | 107.5154966 |
| ENSMUSG000000080607 | -0.947901824 | 0.350882038  | 1.993962772 | 0.157927153 | 0.999071534 | Gm16183       | Gm16183       |          | 0.771980369 | 1.126510844 | 1.95228639  | 2.775284262 | 1.046440986 | 1.236956746 | 0.776583522 | 0.27632981  | 0.392843275 | 1.176461361 |
| ENSMUSG000000035642 | -0.487781424 | 3.199774651  | 1.993719346 | 0.157952532 | 0.999071534 | Aamdc         | Aamdc         | AAMDC    | 13.26402634 | 7.826285862 | 10.97319592 | 11.03175494 | 11.77246109 | 8.003837767 | 7.701119924 | 4.006782239 | 7.385453579 | 9.084896066 |
| ENSMUSG000000044708 | -0.929520138 | 1.269916196  | 1.991142669 | 0.158221455 | 0.999071534 | Kcnj10        | Kcnj10        | KCNJ10   | 1.965040939 | 5.51397413  | 2.760129034 | 1.80393477  | 3.466335765 | 5.384399953 | 0.970729402 | 0.207247357 | 0.942823861 | 0.784307574 |
| ENSMUSG000000023882 | 0.597746664  | 2.336634956  | 1.989907585 | 0.158350542 | 0.999071534 | Zfp54         | Zfp54         |          | 3.36864161  | 5.51397413  | 3.635291898 | 3.81601586  | 3.989556257 | 2.837724299 | 6.665675228 | 6.977327692 | 6.206923753 | 4.967281302 |
| ENSMUSG000000038510 | 0.368800061  | 6.14932631   | 1.989478104 | 0.158395459 | 0.999071534 | Rpf2          | Rpf2          | RPF2     | 72.21525451 | 43.45960255 | 71.89799533 | 64.03968434 | 69.32671529 | 80.91152361 | 126.7772599 | 53.3165325  | 66.15480759 | 58.3655553  |
| ENSMUSG000000074930 | 0.487981641  | 3.491113413  | 1.989361335 | 0.158407673 | 0.999071534 | Gm13981       | Gm13981       |          | 13.47456644 | 6.936935196 | 9.963392611 | 8.950291745 | 8.763943254 | 8.440410737 | 12.10175988 | 9.602460883 | 14.14235792 | 16.60117698 |
| ENSMUSG000000038296 | -0.838097475 | 1.238137218  | 1.987650376 | 0.15858677  | 0.999071534 | Galnt18       | Galnt18       | GALNT18  | 3.36864161  | 3.379532531 | 4.308494102 | 2.22022741  | 1.504258917 | 3.128772945 | 3.041618794 | 0.483577167 | 0.707117896 | 0.71894861  |
| ENSMUSG000000026796 | -0.395321991 | 7.668291518  | 1.987639725 | 0.158587886 | 0.999071534 | Fam129b       | Fam129b       | FAM129B  | 247.2442582 | 339.5540843 | 213.6743794 | 156.1097397 | 249.6415776 | 255.1769005 | 135.7726857 | 210.2869851 | 94.04668015 | 175.5541787 |
| ENSMUSG000000037949 | -0.361506085 | 4.679903224  | 1.986048007 | 0.158754709 | 0.999071534 | Ano10         | Ano10         | ANO10    | 27.93165335 | 42.15522157 | 24.5045602  | 29.97307003 | 24.19894779 | 31.72430242 | 27.56871502 | 17.82327272 | 12.80669078 | 20.71879175 |
| ENSMUSG000000058806 | -0.756874042 | 1.235691723  | 1.985236382 | 0.15883985  | 0.999071534 | Col13a1       | Col13a1       | COL13A1  | 1.684320805 | 5.751134307 | 2.221567271 | 2.428373729 | 2.354492217 | 1.018670261 | 1.423736457 | 2.210638477 | 1.257098482 | 1.895409971 |
| ENSMUSG000000030030 | -1.200939903 | 0.16341907   | 1.982785342 | 0.159097284 | 0.999071534 | 1700003E16Rik | 1700003E16Rik | C2orf81  | 1.894860906 | 2.312311732 | 0.336601102 | 0.763203172 | 1.831271725 | 0.363810808 | 0.19414588  | 1.381649048 | 0           | 0.915025503 |
| ENSMUSG000000040521 | 0.343877442  | 5.041533171  | 1.982572383 | 0.159119674 | 0.999071534 | Tsfm          | Tsfm          | TSFM     | 41.12549966 | 24.54607838 | 26.7934477  | 27.82222473 | 30.1505809  | 49.47826984 | 50.21906774 | 25.62958984 | 24.12057712 | 31.43766193 |
| ENSMUSG000000028248 | 0.475704866  | 6.165374657  | 1.981656069 | 0.159216052 | 0.999071534 | Sfrs18        | Pnir          | PNISR    | 50.45944412 | 39.66503971 | 85.22739895 | 68.06384652 | 66.5798077  | 47.87750228 | 35.46398083 | 95.67919657 | 92.63244436 | 115.7507261 |
| ENSMUSG000000023827 | -0.308076461 | 5.077213081  | 1.980651942 | 0.159321743 | 0.999071534 | Agpat4        | Agpat4        | AGPAT4   | 38.80955855 | 39.54645962 | 37.83396383 | 38.50706913 | 38.39130366 | 36.16279428 | 39.47632902 | 27.14940379 | 18.5422026  | 26.01286787 |
| ENSMUSG000000036905 | -0.572432974 | 7.584285709  | 1.979581065 | 0.159434548 | 0.999071534 | C1qb          | C1qb          | C1QB     | 311.809889  | 270.9555029 | 172.8110056 | 205.2322712 | 233.8795603 | 331.2861214 | 254.1369575 | 88.28737416 | 31.27032473 | 97.51557504 |
| ENSMUSG000000027379 | 0.372793559  | 5.427687801  | 1.97922785  | 0.159471775 | 0.999071534 | Bub1          | Bub1          | BUB1     | 45.05558153 | 34.03248549 | 38.30520537 | 33.99723221 | 43.23109321 | 63.66689133 | 77.27006041 | 27.97839322 | 37.08440521 | 31.43766193 |
| ENSMUSG000000020456 | -0.335566605 | 6.483284136  | 1.977838645 | 0.159618286 | 0.999071534 | Ogdh          | Ogdh          | OGDH     | 115.7970553 | 110.872383  | 106.2986279 | 79.442512   | 106.9985908 | 145.6698474 | 75.19917102 | 56.71669342 | 52.24815564 | 66.53542587 |
| ENSMUSG000000057580 | 0.485515767  | 7.43509042   | 1.976777161 | 0.159730338 | 0.999071534 | Gm10012       | Gm10012       |          | 122.3939785 | 85.49624403 | 190.044982  | 203.2201901 | 140.68091   | 106.5965666 | 180.8792453 | 178.9926342 | 273.7331944 | 185.6848182 |
| ENSMUSG000000056698 | -0.521872391 | 3.082368772  | 1.976363213 | 0.15977406  | 0.999071534 | Elmod3        | Elmod3        | ELMOD3   | 10.6673651  | 7.52983564  | 9.559471289 | 12.83568971 | 10.20279961 | 6.621356699 | 4.400639957 | 9.53337843  | 3.535589479 | 9.150255031 |
| ENSMUSG000000026675 | 0.373548387  | 4.341054701  | 1.976329317 | 0.15977764  | 0.999071534 | Hsd17b7       | Hsd17b7       | HSD17B7  | 17.61518842 | 14.05174052 | 19.65750434 | 14.01518552 | 26.16102464 | 27.35857273 | 28.7335903  | 18.92859196 | 13.27810271 | 23.39850929 |
| ENSMUSG000000033166 | 0.34585288   | 5.540810593  | 1.975146263 | 0.159902673 | 0.999071534 | Dis3          | Dis3          | DIS3     | 49.61728371 | 38.89426913 | 42.14245793 | 38.57645124 | 43.36189834 | 90.44336677 | 60.89709116 | 28.11655812 | 38.89148427 | 40.65327592 |
| ENSMUSG000000031503 | -0.48961091  | 7.008549923  | 1.97487498  | 0.15993136  | 0.999071534 | Col4a2        | Col4a2        | COL4A2   | 125.4819    | 294.3750705 | 123.0613628 | 107.9585578 | 132.5709924 | 238.8054141 | 94.22546731 | 104.2454207 | 48.16258558 | 64.05178521 |
| ENSMUSG000000060261 | -0.334513094 | 6.422731389  | 1.974827991 | 0.159936329 | 0.999071534 | Gtf2i         | Gtf2i         | GTF2I    | 110.2528327 | 114.1333355 | 70.4842707  | 84.7849342  | 118.3132339 | 127.8431178 | 65.55659229 | 68.18438051 | 43.68417223 | 73.79027093 |

|                    |              |             |             |             |             |               |               |             |             |             |             |             |             |             |             |             |             |             |
|--------------------|--------------|-------------|-------------|-------------|-------------|---------------|---------------|-------------|-------------|-------------|-------------|-------------|-------------|-------------|-------------|-------------|-------------|-------------|
| ENSMUSG00000055493 | -0.999413615 | 0.463292399 | 1.973126244 | 0.160116419 | 0.999071534 | Epm2a         | Epm2a         | EPM2A       | 2.947561409 | 2.312311732 | 2.221567271 | 0.624438959 | 0.523220493 | 1.164194584 | 0.906014109 | 1.243484143 | 0.078568655 | 0.71894861  |
| ENSMUSG00000033186 | 0.371352846  | 6.403715511 | 1.972441606 | 0.160188938 | 0.999071534 | Mzt1          | Mzt1          | MZT1        | 93.05872448 | 75.47622653 | 66.24309682 | 74.30823611 | 73.9048946  | 79.67456687 | 158.7466149 | 72.46749256 | 80.8471461  | 64.77073382 |
| ENSMUSG00000022014 | -0.437542058 | 3.964910441 | 1.971759072 | 0.16026127  | 0.999071534 | Epst1l        | Epst1l        | EPST1l      | 19.79076946 | 14.2889007  | 22.01371205 | 19.21884351 | 17.00466601 | 21.46483765 | 14.23736457 | 6.493750525 | 7.464022234 | 16.14366423 |
| ENSMUSG00000072647 | 1.239808569  | 0.741541444 | 1.971575993 | 0.160280679 | 0.999071534 | Adam1a        | Adam1a        |             | 2.105401006 | 1.126510844 | 0           | 0           | 1.63506404  | 1.819054038 | 0.647152935 | 3.039627905 | 1.571373102 | 3.33330719  |
| ENSMUSG00000045291 | 0.883508393  | 0.994624239 | 1.970809401 | 0.160361975 | 0.999071534 | E330021D16Rik | E330021D16Rik | UBE2Q2      | 1.543960738 | 0.652190488 | 0.673202203 | 1.873316877 | 2.092881971 | 0.873145938 | 1.229590576 | 2.417885834 | 4.16413872  | 2.287563758 |
| ENSMUSG00000041945 | -0.711226444 | 2.325133524 | 1.970448766 | 0.160400236 | 0.999071534 | Mfsd9         | Mfsd9         | MFSd9       | 9.053224327 | 9.96072746  | 5.250977187 | 3.122194795 | 4.251166504 | 6.69411886  | 5.75966112  | 3.523205072 | 0.707117896 | 2.156845829 |
| ENSMUSG00000034460 | 0.547656664  | 2.606723839 | 1.969682284 | 0.16048159  | 0.999071534 | Slx4          | Slx4          | SIX4        | 8.91286426  | 4.98036373  | 3.90457278  | 2.914048475 | 4.643581873 | 8.804221544 | 6.406814054 | 5.388431287 | 6.128355098 | 7.646998847 |
| ENSMUSG00000074754 | 0.418346587  | 4.254968151 | 1.969560644 | 0.160494505 | 0.999071534 | Gm561         | Gm561         | LINC00493   | 16.91338808 | 11.20581839 | 20.06142566 | 17.34552664 | 18.63973005 | 13.46099988 | 29.769035   | 19.13583931 | 16.02800564 | 25.03248341 |
| ENSMUSG00000034557 | -0.462952241 | 3.670613311 | 1.969309567 | 0.160521167 | 0.999071534 | Zfyve9        | Zfyve9        | ZFYVE9      | 14.66762701 | 19.98074497 | 12.2522801  | 7.770795933 | 21.84445557 | 16.73529715 | 8.671849326 | 12.08942917 | 6.599767028 | 8.431306421 |
| ENSMUSG00000055681 | -0.307743807 | 6.920100582 | 1.968381365 | 0.160619776 | 0.999071534 | Cope          | Cope          | COPE        | 146.2551899 | 129.9637773 | 143.1227884 | 142.0251721 | 132.6363949 | 123.1863395 | 110.5337213 | 117.0947568 | 70.00467169 | 106.5351121 |
| ENSMUSG00000045237 | -0.340594262 | 4.890989344 | 1.965913142 | 0.160882328 | 0.999071534 | 1110012L19Rik | 1110012L19Rik | Cxorf40B    | 45.54684177 | 30.00076247 | 29.08233519 | 33.09526482 | 33.87852691 | 22.84731872 | 34.42853613 | 27.08032134 | 16.9708295  | 24.57497065 |
| ENSMUSG00000039063 | 0.607402657  | 3.14680525  | 1.963584902 | 0.161130438 | 0.999071534 | Echdc3        | Echdc3        | ECHDC3      | 5.263502516 | 5.869714396 | 6.732022034 | 10.5460802  | 7.194281776 | 5.020589145 | 5.112508185 | 18.37593234 | 8.721120716 | 12.1567674  |
| ENSMUSG00000046441 | 0.487070589  | 3.265119545 | 1.962748041 | 0.161219725 | 0.999071534 | Cmtr2         | Cmtr2         | CMTR2       | 10.8779052  | 9.249246928 | 7.405224238 | 7.076974868 | 6.474853598 | 13.82481069 | 17.60255983 | 7.806317121 | 7.071178959 | 8.104511599 |
| ENSMUSG00000027540 | -0.380503899 | 5.404905692 | 1.962663532 | 0.161228745 | 0.999071534 | Ptpn1         | Ptpn1         | PTPN1       | 57.40726744 | 51.16730832 | 56.27970421 | 34.55228906 | 49.77134937 | 72.32558855 | 31.32220204 | 28.7383002  | 15.32088774 | 39.34609663 |
| ENSMUSG00000061979 | 0.3998064    | 4.154539507 | 1.962162977 | 0.161282181 | 0.999071534 | Wbscr16       | Wbscr16       | RCC1L       | 18.80824899 | 13.04380977 | 18.17645949 | 10.89299073 | 18.63973005 | 26.26714031 | 25.43311034 | 11.19135729 | 14.06378926 | 21.89525311 |
| ENSMUSG00000023010 | -0.355664733 | 9.375705418 | 1.962145273 | 0.161284071 | 0.999071534 | Tmbim6        | Tmbim6        | TMBIM6      | 882.7946419 | 833.9737646 | 720.3936779 | 695.5556182 | 744.4773586 | 781.8294256 | 656.4072218 | 557.978968  | 338.1594915 | 543.4597899 |
| ENSMUSG00000024583 | 0.345312197  | 7.331345392 | 1.961980426 | 0.161301674 | 0.999071534 | Txn1l         | Txn1l         | TXNL1       | 141.4829476 | 139.3908944 | 154.4999057 | 154.999626  | 144.1472458 | 157.8211283 | 227.8625483 | 154.6756109 | 156.7444669 | 164.1163599 |
| ENSMUSG00000034587 | 0.61932407   | 1.969107383 | 1.960871725 | 0.16142012  | 0.999071534 | 8430429K09Rik | 8430429K09Rik |             | 3.36864161  | 1.363671021 | 4.375814322 | 2.983430582 | 3.400933203 | 5.384399953 | 3.882917609 | 5.526596192 | 2.828471584 | 4.771204409 |
| ENSMUSG00000094518 | -1.556525232 | 0.173853609 | 1.960219661 | 0.161489828 | 0.999071534 | Gm6421        | Gm6421        |             | 0           | 3.972432975 | 1.683005509 | 0.277528426 | 1.700466601 | 0.727621615 | 0.776583522 | 0.967154334 | 0           | 0           |
| ENSMUSG00000087368 | 0.810659931  | 1.766429728 | 1.958615511 | 0.161661464 | 0.999071534 | BC065397      | BC065397      |             | 2.596661241 | 2.075151554 | 1.817645949 | 4.093544286 | 1.63506404  | 1.673529715 | 1.035444696 | 6.286503168 | 3.378452169 | 7.189486096 |
| ENSMUSG00000047193 | -0.371885908 | 6.453408665 | 1.956791735 | 0.161856853 | 0.999071534 | Dync2h1       | Dync2h1       | DYNC2H1     | 70.03967347 | 175.6171115 | 75.86988833 | 102.4773714 | 87.96644535 | 85.49553979 | 66.13902994 | 84.14242702 | 50.99105716 | 84.5091411  |
| ENSMUSG00000042363 | -0.446248377 | 3.857816402 | 1.956182049 | 0.161922231 | 0.999071534 | Lgal3l        | Lgal3l        | LGAL3L      | 19.22932919 | 19.38784452 | 22.88887492 | 9.435966491 | 15.56580966 | 16.66253499 | 16.43768454 | 7.253657501 | 7.149747614 | 12.67963911 |
| ENSMUSG00000030346 | 0.52671959   | 3.559997135 | 1.955403288 | 0.162005783 | 0.999071534 | Rad51ap1      | Rad51ap1      | RAD51AP1    | 13.33420637 | 4.861783641 | 9.222870187 | 7.84017804  | 14.6501738  | 19.57302145 | 22.71506801 | 8.013564478 | 7.6997282   | 10.45743432 |
| ENSMUSG00000074507 | 1.370816645  | 0.317358784 | 1.953550518 | 0.162204762 | 0.999071534 | Gm14340       | Gm14340       |             | 0.070180034 | 0.177870133 | 0           | 1.873316877 | 1.046440986 | 0.145524323 | 1.164875283 | 1.72706131  | 1.649941757 | 2.810435474 |
| ENSMUSG00000041064 | 0.577944154  | 2.712460286 | 1.953222627 | 0.162240005 | 0.999071534 | Pif1          | Pif1          | PIF1        | 7.088183388 | 2.668051998 | 2.894769475 | 5.689332737 | 8.502333007 | 11.13261071 | 8.607134033 | 6.562832977 | 6.206923753 | 5.22871716  |
| ENSMUSG00000025355 | -0.31069441  | 5.842484798 | 1.950388979 | 0.162544941 | 0.999071534 | Mmp19         | Mmp19         | MMP19       | 58.31960787 | 80.75304048 | 52.17317076 | 61.95822115 | 76.32478938 | 49.84208064 | 53.97255476 | 64.17759827 | 32.44885456 | 47.12381341 |
| ENSMUSG00000073427 | 0.547446596  | 2.960969681 | 1.949804039 | 0.162607969 | 0.999071534 | Gm4924        | Gm4924        |             | 7.298723488 | 4.387463286 | 7.741825339 | 7.215739081 | 5.559217736 | 5.820972922 | 7.830550511 | 6.286503168 | 11.78529826 | 10.52279329 |
| ENSMUSG00000032398 | 0.476297335  | 3.092572758 | 1.948623961 | 0.162735209 | 0.999071534 | Snape5        | Snape5        | SNAPC5      | 6.035482885 | 6.166164618 | 9.559471289 | 5.758714844 | 9.0255535   | 8.58593506  | 12.29590576 | 8.980718811 | 7.464022234 | 9.673126747 |
| ENSMUSG00000014313 | 0.485440095  | 8.523604283 | 1.946244339 | 0.162992134 | 0.999071534 | Cox6c         | Cox6c         | COX6C       | 270.1229491 | 219.6696145 | 403.6520412 | 411.0195992 | 275.2793818 | 198.7862253 | 395.7987349 | 355.7746298 | 550.137723  | 472.9374672 |
| ENSMUSG00000045757 | 0.585819968  | 1.977505849 | 1.943837519 | 0.163252467 | 0.999071534 | Zfp764        | Zfp764        | AC002310.13 | 3.158101509 | 3.260952442 | 2.01960661  | 3.677251647 | 3.662543449 | 4.584016176 | 5.241938772 | 4.075864691 | 2.671334273 | 5.686229912 |
| ENSMUSG00000024870 | -0.319798623 | 6.719526788 | 1.943385473 | 0.163301416 | 0.999071534 | Rab1b         | Rab1b         | RAB1B       | 132.7806235 | 128.0664959 | 114.8482959 | 97.89815234 | 135.3178999 | 143.3414582 | 111.8280271 | 71.56942068 | 58.21937343 | 80.39152634 |
| ENSMUSG00000051682 | -1.116044759 | 0.15971224  | 1.943155762 | 0.163326296 | 0.999071534 | Trem14        | Trem14        | TREML4      | 1.543960738 | 1.304380977 | 1.548365068 | 1.595788451 | 0.915635862 | 1.8918162   | 0.906014109 | 0.27632981  | 0           | 0.196076894 |
| ENSMUSG00000033326 | -0.379645986 | 4.893389751 | 1.942888071 | 0.163355295 | 0.999071534 | Kdm4a         | Kdm4a         | KDM4A       | 35.93217717 | 44.88256362 | 27.33200946 | 27.82222473 | 38.45670622 | 48.0230266  | 22.13263037 | 22.38271458 | 10.99961171 | 26.86253441 |
| ENSMUSG00000037722 | 0.371459439  | 5.357266784 | 1.942766042 | 0.163368516 | 0.999071534 | Gnpnat1       | Gnpnat1       | GNPNAT1     | 42.88000049 | 28.10348105 | 37.69932339 | 40.72729654 | 35.18657814 | 42.05652936 | 77.78778276 | 38.06443127 | 34.25593362 | 30.26120057 |
| ENSMUSG00000048534 | -0.500140881 | 3.656584599 | 1.941112171 | 0.163547827 | 0.999071534 | Amica1        | Amica1        | JAML        | 25.19463204 | 17.13482283 | 9.694111729 | 12.55816129 | 11.64165596 | 17.89949173 | 10.61330813 | 4.62852431  | 6.521198373 | 12.09140843 |
| ENSMUSG00000028702 | 0.497282891  | 3.382141889 | 1.940786666 | 0.163583145 | 0.999071534 | Rad54l        | Rad54l        | RAD54L      | 13.19384631 | 6.166164618 | 10.56927459 | 5.82809695  | 8.829345815 | 21.24655116 | 14.56094103 | 8.428059192 | 8.32827744  | 7.646998847 |
| ENSMUSG00000017400 | -0.377106354 | 5.830448919 | 1.939781803 | 0.163692228 | 0.999071534 | Stac2         | Stac2         | STAC2       | 64.98671106 | 102.749647  | 52.50977187 | 39.96409337 | 75.21294584 | 47.51369147 | 36.43471023 | 71.15492597 | 31.42746204 | 52.15645367 |
| ENSMUSG00000089788 | 0.548591587  | 5.323519842 | 1.939457534 | 0.163727446 | 0.999071534 | Gm16586       | NA            | NA          | 23.019051   | 20.92938568 | 48.94180019 | 44.5433124  | 29.36575016 | 20.44616739 | 17.14955277 | 59.41090906 | 54.60521529 | 66.86222069 |
| ENSMUSG00000006717 | 0.443714954  | 5.896211458 | 1.939414869 | 0.163732081 | 0.999071534 | Acot13        | Acot13        | ACOT13      | 43.65198086 | 49.44789704 | 50.89408658 | 62.23574957 | 54.153321   | 25.39399437 | 55.07271475 | 107.0087188 | 54.99805857 | 77.84252673 |

|                     |              |              |             |             |             |               |               |          |             |             |             |             |             |             |             |             |             |             |
|---------------------|--------------|--------------|-------------|-------------|-------------|---------------|---------------|----------|-------------|-------------|-------------|-------------|-------------|-------------|-------------|-------------|-------------|-------------|
| ENSMUSG00000071379  | -0.311669837 | 5.329138709  | 1.939280536 | 0.163746674 | 0.999071534 | Hpcal1        | Hpcal1        | HPCAL1   | 36.35325737 | 49.92221739 | 41.26729507 | 49.33067776 | 53.23768514 | 49.11445903 | 31.58106322 | 37.16635939 | 20.11357571 | 38.69250699 |
| ENSMUSG00000063065  | -0.358627966 | 7.346901109  | 1.939175997 | 0.163758031 | 0.999071534 | Mapk3         | Mapk3         | MAPK3    | 160.5017367 | 195.5385665 | 175.5038144 | 192.6741099 | 224.3307863 | 146.7612798 | 102.6384555 | 180.7196955 | 94.12524881 | 166.4039236 |
| ENSMUSG00000015961  | 0.290258077  | 6.616833036  | 1.938401953 | 0.163842153 | 0.999071534 | Adss          | Adss          | ADSS     | 92.42710417 | 96.46490225 | 92.96922429 | 83.25852786 | 93.13324771 | 113.8000206 | 128.0068505 | 98.58065957 | 84.93271616 | 96.01231886 |
| ENSMUSG00000051111  | 1.684918672  | -1.001803158 | 1.938373579 | 0.163845237 | 0.999071534 | Sv2c          | Sv2c          | SV2C     | 0.421080201 | 0           | 0.201960661 | 0           | 0.261610246 | 1.018670261 | 0.19414588  | 0.207247357 | 0           | 1.437897219 |
| ENSMUSG00000073405  | -0.505541051 | 3.787714326  | 1.937043764 | 0.163989877 | 0.999071534 | C920025E04Rik | C920025E04Rik |          | 22.03653053 | 25.13897883 | 10.16535327 | 8.603381212 | 18.18191212 | 17.24463228 | 14.30207986 | 11.95126426 | 4.16413872  | 9.019537102 |
| ENSMUSG00000002221  | 0.340403728  | 4.823324522  | 1.936416784 | 0.164058123 | 0.999071534 | Paxip1        | Paxip1        | PAXIP1   | 30.03705436 | 25.02039874 | 25.78364439 | 21.71659935 | 26.88045282 | 47.6592158  | 28.53944442 | 18.79042705 | 30.56320683 | 28.23507267 |
| ENSMUSG00000006191  | 0.426572944  | 3.554357078  | 1.93585317  | 0.164119499 | 0.999071534 | Cdkal1        | Cdkal1        | CDKAL1   | 8.983044293 | 9.664277238 | 11.44443746 | 10.47669809 | 10.79142266 | 12.15128097 | 12.42533635 | 12.9184186  | 15.16375043 | 10.26135743 |
| ENSMUSG00000005672  | -0.56128621  | 3.121197515  | 1.935803486 | 0.16412491  | 0.999071534 | Kit           | Kit           | KIT      | 8.91286426  | 19.20997439 | 10.56927459 | 5.758714844 | 8.829345815 | 12.22404314 | 6.212668174 | 7.737234668 | 4.949825271 | 3.267948225 |
| ENSMUSG00000006342  | 1.178187324  | -0.061814632 | 1.934944753 | 0.164218478 | 0.999071534 | Susd2         | Susd2         | SUSD2    | 0.210540101 | 0.592900444 | 0.875162864 | 0           | 0.981038424 | 1.746291877 | 0.258861174 | 1.105319238 | 1.257098482 | 1.241820326 |
| ENSMUSG00000072674  | -0.74136765  | 2.276282086  | 1.93429292  | 0.164289542 | 0.999071534 | Plac9b        | Plac9b        | PLAC9    | 6.877643287 | 2.905212176 | 7.337904017 | 10.96237283 | 2.027479409 | 4.365729691 | 5.177223478 | 2.417885834 | 0.864255206 | 4.771204409 |
| ENSMUSG000000024726 | 0.387144313  | 4.350052459  | 1.933549711 | 0.164370611 | 0.999071534 | 2410127L17Rik | Carmmt1       | CARNMT1  | 13.40438641 | 18.20204363 | 20.46534698 | 18.52502245 | 20.40559922 | 25.9033295  | 31.64577851 | 14.43823255 | 22.31349805 | 16.27438216 |
| ENSMUSG00000011877  | -0.310889333 | 6.107138401  | 1.932419648 | 0.164493966 | 0.999071534 | Git1          | Git1          | GIT1     | 76.42605653 | 84.48831328 | 79.1012589  | 67.57817178 | 88.81667865 | 91.38927487 | 41.02949607 | 66.04282449 | 39.75573948 | 65.16288761 |
| ENSMUSG00000004885  | -0.405626834 | 8.032056121  | 1.932383565 | 0.164497907 | 0.999071534 | Crabp2        | Crabp2        | CRABP2   | 239.7349946 | 222.1005063 | 414.3559562 | 354.7507108 | 309.3541163 | 197.5492685 | 163.2119702 | 238.9562028 | 185.2648887 | 291.5009817 |
| ENSMUSG00000008200  | 0.309696863  | 5.766414462  | 1.932204256 | 0.16451749  | 0.999071534 | Fnbp4         | Fnbp4         | FNBP4    | 49.89800385 | 39.54645962 | 59.44375456 | 47.11045035 | 55.78838504 | 64.97661024 | 39.92933608 | 59.61815642 | 55.62660781 | 68.23475894 |
| ENSMUSG000000036916 | 0.331594564  | 4.464749359  | 1.931559663 | 0.164587911 | 0.999071534 | Zfp280c       | Zfp280c       | ZNF280C  | 17.54500839 | 20.98867572 | 23.62939734 | 16.9986161  | 21.84445557 | 25.68504302 | 20.64417862 | 24.17885834 | 23.0991846  | 23.59458619 |
| ENSMUSG000000025602 | 0.543497187  | 2.51672431   | 1.930459491 | 0.164708183 | 0.999071534 | Zfp202        | Zfp202        | ZNF202   | 4.842422314 | 4.565333419 | 4.981696305 | 5.064893778 | 4.120361381 | 5.74821076  | 3.947632902 | 5.733843549 | 6.992610304 | 9.019537102 |
| ENSMUSG000000063171 | 1.125930006  | 0.340479538  | 1.93008204  | 0.16474947  | 0.999071534 | Rps4y2        | Rps4l         |          | 1.052700503 | 0.5336104   | 1.279084186 | 0           | 0.850233301 | 2.40115133  | 3.559341141 | 0.621742072 | 0.471411931 | 0.784307574 |
| ENSMUSG000000021252 | 0.382923434  | 4.626265643  | 1.929510033 | 0.16481206  | 0.999071534 | 0610007P14Rik | 0610007P14Rik | C14orf1  | 18.31698875 | 16.4233423  | 24.70652087 | 24.3531194  | 26.68424513 | 35.43517266 | 41.676649   | 19.41216912 | 14.92804447 | 26.07822684 |
| ENSMUSG000000037795 | -0.409088442 | 3.88639337   | 1.928917917 | 0.164876879 | 0.999071534 | N4bp2         | N4bp2         | N4BP2    | 15.86068758 | 16.66050248 | 15.61829112 | 24.14497308 | 13.86534306 | 17.53568093 | 9.448432848 | 12.22759407 | 7.85686551  | 14.96720287 |
| ENSMUSG000000040165 | 0.831376185  | 2.124113122  | 1.926883011 | 0.165099863 | 0.999071534 | Cd209c        | Cd209c        | CLEC4M   | 1.052700503 | 2.430891821 | 4.039213221 | 6.105625376 | 1.896674286 | 1.819054038 | 1.48845175  | 7.806317121 | 5.656943167 | 8.300588492 |
| ENSMUSG000000032221 | 0.662452864  | 1.976972969  | 1.924317203 | 0.165381515 | 0.999071534 | Mns1          | Mns1          | MNS1     | 1.965040939 | 1.541541155 | 5.116336746 | 2.081463196 | 4.643581873 | 6.839643183 | 4.400639957 | 2.417885834 | 4.00700141  | 5.22871716  |
| ENSMUSG000000001166 | -0.727935299 | 1.215579681  | 1.920670298 | 0.165782786 | 0.999071534 | Oas1c         | Oas1c         | OAS1     | 2.947561409 | 1.956571465 | 4.577774983 | 2.497755836 | 2.158284533 | 1.309718907 | 2.588611739 | 0.898071881 | 1.649941757 | 1.372538255 |
| ENSMUSG000000039942 | -0.529952701 | 2.736875914  | 1.920380742 | 0.165814694 | 0.999071534 | Ptger4        | Ptger4        | PTGER4   | 7.158363421 | 9.486407105 | 8.145746661 | 9.158438064 | 5.951633105 | 9.386318836 | 4.141778783 | 5.941090906 | 2.357059653 | 5.032640267 |
| ENSMUSG000000014226 | 0.396355723  | 7.434027069  | 1.920343076 | 0.165818845 | 0.999071534 | Cacybp        | Cacybp        | CACYBP   | 163.0282179 | 121.7817512 | 162.9149332 | 140.4987658 | 187.7053518 | 207.4449225 | 332.2483167 | 121.4469513 | 131.7596346 | 165.2274623 |
| ENSMUSG000000020536 | -0.300157787 | 5.64355137   | 1.919592775 | 0.16590156  | 0.999071534 | Llg1l         | Llg1l         | LLGL1    | 61.26716928 | 65.57478911 | 53.92349649 | 47.17983245 | 58.53529263 | 72.03453991 | 33.13423026 | 44.97267651 | 29.93465759 | 41.56830143 |
| ENSMUSG000000067367 | 0.417487462  | 6.056227257  | 1.919407049 | 0.165922042 | 0.999071534 | Lyar          | Lyar          | LYAR     | 45.1959416  | 30.00076247 | 89.6705335  | 63.83153803 | 65.33715903 | 84.3313452  | 52.93711007 | 50.77560251 | 92.23960108 | 79.86865462 |
| ENSMUSG000000031834 | -0.319674284 | 6.016762905  | 1.918385918 | 0.166034705 | 0.999071534 | Pik3r2        | Pik3r2        | PIK3R2   | 65.61833136 | 77.61066813 | 73.78296149 | 62.09698536 | 94.44129894 | 78.58313444 | 37.98787727 | 60.93072301 | 36.84869924 | 68.43083584 |
| ENSMUSG000000063406 | 0.393922473  | 7.731930963  | 1.918089585 | 0.166067416 | 0.999071534 | Tmed5         | Tmed5         | TMED5    | 163.3089381 | 130.9124181 | 237.4384171 | 206.5505312 | 212.3621175 | 185.1069389 | 254.2016728 | 250.4238899 | 253.776756  | 192.3514325 |
| ENSMUSG000000026434 | 0.451837608  | 7.621444014  | 1.915949974 | 0.166303821 | 0.999071534 | Nucks1        | Nucks1        | NUCKS1   | 134.2544042 | 97.05780269 | 239.8619451 | 218.4842535 | 167.0381423 | 234.0758736 | 151.1102103 | 152.8103847 | 289.6040627 | 243.2007069 |
| ENSMUSG000000003559 | 0.470639932  | 3.170407199  | 1.9158608   | 0.166313682 | 0.999071534 | As3mt         | As3mt         | AS3MT    | 8.702324159 | 8.656346483 | 5.85685917  | 5.550568524 | 10.07199449 | 13.89757285 | 13.13720458 | 6.770080335 | 7.85686551  | 8.888819173 |
| ENSMUSG000000038178 | -0.505846795 | 4.660486101  | 1.915639003 | 0.166338212 | 0.999071534 | Slc43a2       | Slc43a2       | SLC43A2  | 41.19567969 | 49.2700269  | 18.64770103 | 23.86744465 | 20.92881971 | 47.51369147 | 23.75051271 | 11.39860464 | 8.17114013  | 16.66653595 |
| ENSMUSG000000031807 | -0.329460368 | 6.388574113  | 1.914859869 | 0.166424414 | 0.999071534 | Pgl5          | Pgl5          | PGL5     | 106.8140111 | 61.72093622 | 122.2535201 | 108.0279399 | 82.99585067 | 86.29592357 | 67.88634286 | 57.40751794 | 62.38351215 | 85.09737179 |
| ENSMUSG000000075602 | -0.39733446  | 8.77239602   | 1.912253751 | 0.166713123 | 0.999071534 | Ly6a          | Ly6a          |          | 459.3283195 | 401.6307608 | 479.6565699 | 715.1213722 | 505.430996  | 373.1971264 | 358.6521565 | 377.1211076 | 212.6853494 | 517.3162041 |
| ENSMUSG000000082277 | 1.31322877   | -0.132503936 | 1.911310712 | 0.166817735 | 0.999071534 | Gm15807       | Gm15807       |          | 0.421080201 | 0.177870133 | 1.346404407 | 0.138764213 | 0.327012808 | 0.800383777 | 0.129430587 | 0.898071881 | 2.985608894 | 0.261435858 |
| ENSMUSG000000050271 | -0.465851657 | 4.254212991  | 1.911184713 | 0.166831718 | 0.999071534 | D8Ert82e      | D8Ert82e      | SGK223   | 19.15914916 | 34.62538593 | 27.53397102 | 10.89299073 | 22.69468887 | 32.08811323 | 12.55476693 | 14.09282029 | 7.071178959 | 15.22863873 |
| ENSMUSG000000025855 | -0.8612462   | 1.12520769   | 1.911128487 | 0.166837958 | 0.999071534 | Prkar1b       | Prkar1b       | PRKAR1B  | 2.877381375 | 2.608761954 | 1.211763966 | 5.134275885 | 1.700466601 | 1.164194584 | 1.29430587  | 0.27632981  | 2.199922343 | 1.830051006 |
| ENSMUSG000000020935 | -0.332626014 | 5.026291676  | 1.910216102 | 0.166939256 | 0.999071534 | Dcakd         | Dcakd         | DCAKD    | 38.24811828 | 37.23414789 | 33.45814951 | 30.04245214 | 49.70594681 | 50.42417793 | 26.53327033 | 25.21509512 | 16.42084892 | 25.48999616 |
| ENSMUSG000000018507 | -0.329009529 | 4.273462572  | 1.910074876 | 0.166954942 | 0.999071534 | Trpv2         | Trpv2         | TRPV2    | 21.82599043 | 22.17447661 | 24.97580175 | 21.2309246  | 20.73261203 | 21.24655116 | 16.24353866 | 16.23437631 | 14.06378926 | 14.90184391 |
| ENSMUSG000000054999 | 1.172816723  | 0.159337973  | 1.909558048 | 0.16701236  | 0.999071534 | Naalad1l      | Naalad1l      | NAALADL1 | 0.631620302 | 0.415030311 | 1.279084186 | 0.138764213 | 0.784830739 | 0.291048646 | 0.388291761 | 1.243484143 | 3.378452169 | 0.784307574 |

|                     |              |              |             |             |             |               |               |          |             |             |             |             |             |             |             |             |             |             |
|---------------------|--------------|--------------|-------------|-------------|-------------|---------------|---------------|----------|-------------|-------------|-------------|-------------|-------------|-------------|-------------|-------------|-------------|-------------|
| ENSMUSG00000020668  | -0.361795546 | 4.605322627  | 1.908780275 | 0.167098811 | 0.999071534 | Klf3c         | Klf3c         | KIF3C    | 29.75633422 | 35.39615651 | 22.61959403 | 17.41490874 | 37.21405755 | 29.03210245 | 15.40223985 | 20.79381817 | 17.20653547 | 20.98022761 |
| ENSMUSG00000060636  | 0.464741104  | 7.829175122  | 1.908257134 | 0.167156988 | 0.999071534 | Rpb35a        | Rpb35a        | RPL35A   | 202.6097568 | 156.1106869 | 217.242351  | 247.9716488 | 161.8059374 | 118.5295611 | 210.0011273 | 272.7375221 | 329.5169395 | 280.4553167 |
| ENSMUSG000000021811 | 0.392472515  | 5.943132611  | 1.907728733 | 0.167215773 | 0.999071534 | Dnajc9        | Dnajc9        | DNAJC9   | 49.96818388 | 33.43958505 | 64.22349021 | 63.5540096  | 63.50588731 | 73.63530746 | 101.6030108 | 34.19581393 | 67.49047473 | 58.03876048 |
| ENSMUSG000000016150 | 1.29192473   | -0.269360017 | 1.907648227 | 0.167224732 | 0.999071534 | Tenm1         | Tenm1         | TENM1    | 0.140360067 | 0.237160178 | 0.807842644 | 0.624438959 | 0.327012808 | 0.291048646 | 0.582437641 | 1.381649048 | 2.199922343 | 0.065358965 |
| ENSMUSG000000067722 | 0.344178321  | 4.837817955  | 1.904608133 | 0.167563428 | 0.999071534 | BC003965      | BC003965      | C16orf91 | 31.72137516 | 19.56571465 | 27.803251   | 24.56126572 | 26.68424513 | 29.75972406 | 35.46398083 | 20.24115855 | 28.83469642 | 38.3003532  |
| ENSMUSG000000032372 | 0.499277524  | 2.945792556  | 1.903036425 | 0.16773884  | 0.999071534 | Plscr2        | Plscr2        | PLSCR2   | 9.12340436  | 3.972432975 | 5.99149961  | 6.660682229 | 6.867268968 | 7.203453991 | 9.124856381 | 9.257048621 | 8.32827744  | 8.235229528 |
| ENSMUSG000000043631 | -0.7871902   | 1.057218411  | 1.902081239 | 0.167845547 | 0.999071534 | Ecm2          | Ecm2          | ECM2     | 2.666841275 | 1.185800888 | 4.308494102 | 2.983430582 | 1.569661478 | 2.473913492 | 1.359021163 | 0.483577167 | 1.178529826 | 1.568615148 |
| ENSMUSG000000030811 | -0.353771504 | 4.417365682  | 1.901854819 | 0.167870853 | 0.999071534 | Fbxl19        | Fbxl19        | FBXL19   | 25.47535218 | 23.83459785 | 25.58168373 | 21.30030671 | 27.79608868 | 32.5246862  | 14.56094103 | 18.23776743 | 10.37106247 | 17.71227938 |
| ENSMUSG000000041449 | -1.056806934 | 1.38571981   | 1.900838315 | 0.167984515 | 0.999071534 | Serpina3h     | Serpina3h     |          | 2.315941107 | 11.68013875 | 1.009803305 | 1.318260024 | 1.046440986 | 2.910486461 | 3.300479967 | 0.27632981  | 0.31427462  | 1.372538255 |
| ENSMUSG000000034312 | -0.342279783 | 4.590009307  | 1.900045529 | 0.168073223 | 0.999071534 | Iqsec1        | Iqsec1        | IQSEC1   | 25.19463204 | 36.28550718 | 27.4666499  | 23.17362359 | 27.14206306 | 32.30639972 | 15.20809397 | 20.79381817 | 15.79229967 | 19.93448417 |
| ENSMUSG000000027454 | 0.469164678  | 4.029576551  | 1.898888911 | 0.168202738 | 0.999071534 | Gins1         | Gins1         | GIN1     | 19.58022936 | 6.284744707 | 14.00260583 | 15.05591712 | 15.63121222 | 24.9574214  | 26.92156209 | 9.049801264 | 13.27810271 | 18.36586903 |
| ENSMUSG000000022479 | -0.47221154  | 4.747935674  | 1.897981785 | 0.168304396 | 0.999071534 | Vdr           | Vdr           | VDR      | 29.47561409 | 40.43581029 | 25.78364439 | 33.16464693 | 32.30886543 | 16.15319986 | 6.924536402 | 27.08032134 | 23.41345922 | 31.50302089 |
| ENSMUSG000000027712 | -0.358981581 | 7.893624416  | 1.897882566 | 0.168315519 | 0.999071534 | Anxa5         | Anxa5         | ANXA5    | 272.3687102 | 304.9286984 | 251.3737028 | 277.0427515 | 280.5769892 | 337.7619538 | 203.4001674 | 164.1399069 | 117.774414  | 218.0375056 |
| ENSMUSG000000085894 | 0.912242766  | 5.033058362  | 1.897697576 | 0.16833626  | 0.999071534 | Gm15832       | Gm15832       |          | 12.562226   | 3.616692709 | 43.3542219  | 38.36830492 | 17.78949675 | 6.403070214 | 5.694945826 | 50.22294289 | 85.87554002 | 36.66637909 |
| ENSMUSG000000021843 | 0.456247676  | 7.666689479  | 1.897640516 | 0.168342658 | 0.999071534 | Ktn1          | Ktn1          | KTN1     | 108.0070716 | 174.964921  | 210.9815706 | 192.1884351 | 199.8702282 | 139.9216366 | 142.2442151 | 277.4351288 | 291.0182895 | 234.3772467 |
| ENSMUSG000000035776 | -0.29710545  | 6.071331844  | 1.897557761 | 0.168351938 | 0.999071534 | Cd99l2        | Cd99l2        | CD99L2   | 79.7245181  | 93.55699007 | 58.43395126 | 70.35345604 | 82.86504554 | 61.62955081 | 71.51039929 | 59.34182661 | 41.56281855 | 58.03876048 |
| ENSMUSG000000019775 | 0.488507104  | 7.188916754  | 1.896504368 | 0.168470114 | 0.999071534 | Rgs17         | Rgs17         | RGS17    | 101.4101485 | 112.5325043 | 137.8718113 | 135.3644899 | 141.269533  | 65.12213456 | 96.94350963 | 197.7830612 | 223.920667  | 192.4821505 |
| ENSMUSG000000009614 | -0.741500512 | 2.221000509  | 1.894717484 | 0.168670794 | 0.999071534 | Sardh         | Sardh         | SARDH    | 3.719541778 | 7.351965506 | 7.405224238 | 8.117706466 | 2.485297341 | 9.386318836 | 1.29430587  | 1.934308667 | 2.985608894 | 1.764692042 |
| ENSMUSG000000048616 | 0.726454666  | 2.314423957  | 1.894508445 | 0.168694289 | 0.999071534 | Nog           | Nog           | NOG      | 2.877381375 | 3.083082309 | 2.962089695 | 4.579219032 | 5.428412612 | 2.692199976 | 1.29430587  | 9.671543335 | 7.071178959 | 7.124127131 |
| ENSMUSG000000049313 | -0.411141314 | 3.666101283  | 1.894502586 | 0.168694948 | 0.999071534 | Sorl1         | Sorl1         | SORL1    | 18.52752886 | 18.61707394 | 12.92548231 | 13.46012867 | 10.98763035 | 14.47967014 | 10.80745401 | 7.668152216 | 7.464022234 | 12.54892118 |
| ENSMUSG000000091831 | 0.910281559  | 0.903488103  | 1.894274768 | 0.168720557 | 0.999071534 | Gm4707        | Gm4707        |          | 1.684320805 | 0.830060622 | 2.154247051 | 0.763203172 | 0.915635862 | 1.964578361 | 0.388291761 | 1.243484143 | 4.16413872  | 2.745076509 |
| ENSMUSG000000032812 | -0.302733028 | 5.393488766  | 1.893722026 | 0.168782711 | 0.999071534 | Arap1         | Arap1         | ARAP1    | 50.95070435 | 54.78400103 | 44.90258697 | 41.07420708 | 49.11732376 | 63.44860485 | 31.32220204 | 31.29435093 | 28.28471584 | 31.76445675 |
| ENSMUSG000000022792 | 0.390309654  | 4.261701641  | 1.89311204  | 0.168851332 | 0.999071534 | Yars2         | Yars2         | YARS2    | 20.35220973 | 16.66050248 | 16.5607742  | 12.28063286 | 20.20939153 | 25.61228086 | 33.32837614 | 13.0565835  | 16.02800564 | 17.51620249 |
| ENSMUSG000000031400 | -0.362080509 | 6.789577036  | 1.892497311 | 0.168920518 | 0.999071534 | G6pdx         | G6pdx         | G6PD     | 135.938725  | 143.2447473 | 115.0502566 | 90.19673851 | 164.7490527 | 145.1605122 | 101.9913025 | 108.3903678 | 38.89148427 | 89.6724993  |
| ENSMUSG000000026837 | -0.394274848 | 7.839571979  | 1.892197689 | 0.168954252 | 0.999071534 | Col5a1        | Col5a1        | COL5A1   | 218.6809845 | 398.0733581 | 284.4952512 | 220.6350988 | 229.8246014 | 342.1276835 | 182.2382664 | 164.5544016 | 103.0820755 | 202.8742258 |
| ENSMUSG000000027371 | 1.119179516  | 0.059470345  | 1.891864709 | 0.168991751 | 0.999071534 | Fahd2a        | Fahd2a        | FAHD2A   | 0.280720134 | 0.770770577 | 1.077123525 | 0           | 0.850233301 | 1.746291877 | 0.970729402 | 2.003391119 | 0.31427462  | 1.176461361 |
| ENSMUSG000000050345 | -0.93367007  | 0.436401748  | 1.890937051 | 0.16909627  | 0.999071534 | 4930486L24Rik | 4930486L24Rik |          | 1.894860906 | 2.193731643 | 2.288887492 | 0.277528426 | 1.700466601 | 1.528005392 | 0.647152935 | 0.967154334 | 0.707117896 | 0.261435858 |
| ENSMUSG000000042357 | -1.174802713 | -0.204188697 | 1.89081471  | 0.169110059 | 0.999071534 | Gjb5          | Gjb5          | GJB5     | 0.631620302 | 0.177870133 | 1.88496617  | 1.595788451 | 0.915635862 | 0.582097292 | 0.711868828 | 0.345412262 | 0           | 0.588230681 |
| ENSMUSG000000048170 | 0.281411013  | 5.669622186  | 1.890473082 | 0.169148572 | 0.999071534 | Mcmbp         | Mcmbp         | MCMBP    | 46.31882214 | 56.14767205 | 40.72873331 | 38.50706913 | 57.09643627 | 71.59796694 | 53.84312417 | 52.29541646 | 46.04123189 | 47.25453134 |
| ENSMUSG000000051890 | 0.679915743  | 2.131493054  | 1.888497339 | 0.169371504 | 0.999071534 | Klhdc1        | Klhdc1        | KLHDC1   | 2.38612114  | 7.589125684 | 1.548365068 | 2.358991623 | 3.139322957 | 2.837724299 | 5.112508185 | 5.457513739 | 5.106962581 | 6.078383699 |
| ENSMUSG000000042305 | 0.296510383  | 6.32596846   | 1.887359941 | 0.169499995 | 0.999071534 | Tmem183a      | Tmem183a      | TMEM183A | 87.44432179 | 67.76852076 | 74.52348392 | 61.75007483 | 82.9304481  | 89.78850732 | 114.0283471 | 77.9250063  | 62.69778677 | 83.65947457 |
| ENSMUSG000000074457 | -0.398005288 | 5.382733714  | 1.887199644 | 0.169518112 | 0.999071534 | S100a16       | S100a16       | S100A16  | 67.5833723  | 42.09593153 | 54.79865936 | 46.90230403 | 34.07473459 | 39.00051858 | 62.45025821 | 31.29435093 | 15.79229967 | 28.43114956 |
| ENSMUSG000000037295 | -0.403710335 | 4.467832718  | 1.886176191 | 0.169633841 | 0.999071534 | Ldlrap1       | Ldlrap1       | LDLRAP1  | 36.77433758 | 26.62122994 | 25.31240285 | 19.21884351 | 22.76009144 | 37.69079967 | 18.63800452 | 13.0565835  | 8.878258026 | 18.10443317 |
| ENSMUSG000000058454 | 0.363918321  | 4.547731692  | 1.886069327 | 0.16964593  | 0.999071534 | Dhcr7         | Dhcr7         | DHCR7    | 23.36995117 | 28.87425163 | 13.32940363 | 16.58232347 | 23.93733754 | 29.97801055 | 32.35764674 | 25.00784777 | 19.87786974 | 19.93448417 |
| ENSMUSG000000098470 | -0.750722263 | 3.158638653  | 1.885533105 | 0.169706605 | 0.999071534 | C1rb          | C1rb          | C1R      | 2.456301174 | 13.34025999 | 18.31109993 | 9.991023343 | 13.01510976 | 4.656778337 | 4.983077598 | 15.9580465  | 1.414235792 | 4.771204409 |
| ENSMUSG000000069919 | -0.663448157 | 6.29673018   | 1.883968456 | 0.169883791 | 0.999071534 | Hba-a1        | Hba-a1        | HBA1     | 54.31934596 | 259.2753642 | 53.85617627 | 74.72452875 | 58.66609775 | 20.2278809  | 72.02812164 | 122.8976828 | 27.42046063 | 45.62055722 |
| ENSMUSG000000061666 | -0.425305229 | 3.702019451  | 1.883181631 | 0.169972975 | 0.999071534 | Gdpd1         | Gdpd1         | GDPD1    | 12.84294614 | 13.10309981 | 17.50325729 | 15.81912029 | 17.2008737  | 10.11394045 | 7.053966989 | 12.02034672 | 12.80669078 | 9.803844676 |
| ENSMUSG000000046949 | 0.332668941  | 5.58571845   | 1.882831671 | 0.170012659 | 0.999071534 | Nqo2          | Nqo2          | NQO2     | 52.70520519 | 30.11934256 | 51.56728878 | 40.72729654 | 45.1277675  | 54.6443833  | 72.54584399 | 34.33397884 | 47.7697423  | 47.64668512 |
| ENSMUSG000000086377 | 1.384904226  | -0.27006256  | 1.882657662 | 0.170032394 | 0.999071534 | 4930529C04Rik | 4930529C04Rik |          | 0.070180034 | 0           | 0.740522424 | 0.763203172 | 0.457817931 | 0.291048646 | 0.258861174 | 0.414494714 | 2.278490998 | 1.372538255 |

|                     |              |              |             |             |             |               |               |         |             |             |             |             |             |             |             |             |             |             |
|---------------------|--------------|--------------|-------------|-------------|-------------|---------------|---------------|---------|-------------|-------------|-------------|-------------|-------------|-------------|-------------|-------------|-------------|-------------|
| ENSMUSG00000036615  | -0.391999567 | 3.858583347  | 1.880623389 | 0.170263312 | 0.999071534 | Rfxap         | Rfxap         | RFXAP   | 19.58022936 | 19.03210425 | 18.44574037 | 11.79495811 | 16.21983528 | 15.4983404  | 13.71964222 | 13.74740803 | 6.206923753 | 12.09140843 |
| ENSMUSG000000028139 | 1.077293196  | 0.194571324  | 1.879821514 | 0.170354435 | 0.999071534 | Riad1         | Riad1         | RIAD1   | 0.491260235 | 0.296450222 | 1.144443746 | 0.901967385 | 0.588623054 | 0.800383777 | 0.323576467 | 1.72706131  | 2.907040239 | 0.522871716 |
| ENSMUSG000000031982 | 0.669660219  | 1.879658387  | 1.878484514 | 0.170506493 | 0.999071534 | Arv1          | Arv1          | ARV1    | 4.140621979 | 2.96450222  | 3.567971678 | 0.832585279 | 2.87771271  | 4.365729691 | 3.365195261 | 2.556050739 | 5.028393926 | 5.424794054 |
| ENSMUSG000000063146 | -0.349624447 | 5.218948139  | 1.878271176 | 0.17053077  | 0.999071534 | Clip2         | Clip2         | CLIP2   | 43.23090066 | 55.19903134 | 36.75684031 | 32.60959008 | 49.11732376 | 57.70039409 | 29.31602795 | 33.71223677 | 15.16375043 | 28.56186749 |
| ENSMUSG00000040928  | -0.328693984 | 4.672455459  | 1.876507777 | 0.170731593 | 0.999071534 | S100pbp       | S100pbp       | S100PBP | 25.05427197 | 31.60159367 | 29.68821717 | 29.07110264 | 31.13161932 | 26.99476192 | 16.95540689 | 25.76775474 | 13.74951464 | 26.53573959 |
| ENSMUSG000000052684 | -0.338366329 | 7.198829591  | 1.876173329 | 0.170769712 | 0.999071534 | Jun           | Jun           | JUN     | 172.9236026 | 175.6171115 | 178.0619828 | 143.7597248 | 182.4077443 | 138.4663934 | 87.17150032 | 163.8635771 | 107.9533321 | 125.9467246 |
| ENSMUSG000000050270 | -0.676831175 | 1.549134198  | 1.875230762 | 0.170877194 | 0.999071534 | Tmem220       | Tmem220       | TMEM220 | 2.526481208 | 2.371601776 | 4.106533441 | 4.717983245 | 3.989556257 | 1.091432423 | 2.265035272 | 1.934308667 | 1.885647722 | 2.941153403 |
| ENSMUSG00000044148  | -0.307794458 | 5.674237153  | 1.874919871 | 0.170912663 | 0.999071534 | 1810030O07Rik | 1810030O07Rik | CXorf38 | 52.07358489 | 67.53136058 | 54.52937848 | 56.54641684 | 61.93622583 | 60.61088055 | 48.47175482 | 49.25578856 | 20.8206936  | 46.60094169 |
| ENSMUSG00000028558  | 0.706118966  | 1.718999304  | 1.874626878 | 0.170946097 | 0.999071534 | Calr4         | Calr4         | Calr4   | 2.807201342 | 2.371601776 | 2.490848153 | 1.318260024 | 3.597140888 | 1.746291877 | 2.329750565 | 3.385040167 | 3.8498641   | 7.058768167 |
| ENSMUSG000000027221 | -0.374244564 | 4.638603498  | 1.873477723 | 0.171077303 | 0.999071534 | Chst1         | Chst1         | CHST1   | 30.66867466 | 40.55439037 | 24.30259954 | 22.34103831 | 27.86149124 | 19.8640701  | 16.04939278 | 32.46875263 | 14.45663254 | 21.04558657 |
| ENSMUSG000000001021 | 0.71498973   | 1.934537351  | 1.873042427 | 0.171127033 | 0.999071534 | S100a3        | S100a3        | S100A3  | 3.017741442 | 2.490181865 | 3.567971678 | 1.457024238 | 4.120361381 | 1.528005392 | 6.600959935 | 3.039627905 | 6.521198373 | 3.33330719  |
| ENSMUSG000000027829 | 0.388855471  | 6.505542584  | 1.872938721 | 0.171138883 | 0.999071534 | Ccn1l         | Ccn1l         | CCNL1   | 77.89983723 | 79.74510973 | 100.0378474 | 75.07143929 | 74.95133559 | 75.67264798 | 50.34849833 | 136.7141733 | 95.93232787 | 126.6656732 |
| ENSMUSG00000042265  | -0.568014381 | 3.811122903  | 1.872314741 | 0.171210205 | 0.999071534 | Trem1         | Trem1         | TREM1   | 29.61597415 | 24.30891821 | 9.69411729  | 13.32136446 | 9.679579116 | 18.3360647  | 16.17882337 | 7.944482025 | 2.828471584 | 11.56853672 |
| ENSMUSG000000021200 | -0.843990781 | 2.393655174  | 1.872227605 | 0.171220167 | 0.999071534 | Asb2          | Asb2          | ASB2    | 5.052962415 | 4.209593153 | 5.99149961  | 12.00310443 | 6.409451036 | 12.07851881 | 0.776583522 | 0.552659619 | 2.907040239 | 2.941153403 |
| ENSMUSG000000084899 | 1.029819114  | 0.137565908  | 1.871939405 | 0.171253122 | 0.999071534 | Gm15344       | Gm15344       |         | 0.491260235 | 0.355740266 | 1.009803305 | 0.971349492 | 0.457817931 | 0.582097292 | 0.323576467 | 2.556050739 | 0.942823861 | 1.764692042 |
| ENSMUSG000000083474 | 1.91626379   | -0.184906482 | 1.870164908 | 0.171456194 | 0.999071534 | Gm15267       | Gm15267       |         | 0           | 0.889350666 | 0           | 0           | 0.719428178 | 0           | 2.523896446 | 1.4507315   | 0           | 1.699333077 |
| ENSMUSG000000027430 | 0.510875894  | 2.55847603   | 1.870052584 | 0.171469057 | 0.999071534 | Dtd1          | Dtd1          | DTD1    | 3.859901845 | 4.921073686 | 6.866662475 | 3.330341114 | 5.75542542  | 7.203453991 | 7.959981098 | 6.977327692 | 4.871256616 | 5.816947841 |
| ENSMUSG000000048756 | -0.363383244 | 6.655634363  | 1.869984117 | 0.171476899 | 0.999071534 | Foxo3         | Foxo3         | FOXO3   | 101.6908686 | 123.3232924 | 120.1665933 | 112.7459231 | 130.2819027 | 103.4677937 | 39.47632902 | 113.0879746 | 68.35472994 | 101.8946257 |
| ENSMUSG000000015597 | 0.420100057  | 4.361176327  | 1.869928586 | 0.171483259 | 0.999071534 | Zfp318        | Zfp318        | ZNF318  | 12.49204597 | 14.94109119 | 17.50325729 | 21.36968882 | 24.06814267 | 21.61036197 | 13.8490728  | 23.62619872 | 30.32750087 | 19.93448417 |
| ENSMUSG000000020649 | 0.582655004  | 6.00151018   | 1.869248389 | 0.171561187 | 0.999071534 | Rrm2          | Rrm2          | RRM2    | 84.56694042 | 30.47508283 | 52.37513143 | 38.22954071 | 61.80542071 | 151.7091068 | 152.2103703 | 23.28078646 | 32.52742321 | 33.39843086 |
| ENSMUSG00000026082  | 0.40145767   | 4.214908492  | 1.868480127 | 0.171649254 | 0.999071534 | Rev1          | Rev1          | REV1    | 15.15888725 | 17.19411288 | 16.42613376 | 8.187088573 | 26.29182976 | 19.42749713 | 19.47930334 | 22.52087948 | 16.42084892 | 23.00635551 |
| ENSMUSG000000085022 | 0.921531122  | 1.727777715  | 1.867270718 | 0.171787995 | 0.999071534 | Gm5860        | Gm5860        |         | 1.052700503 | 0.5336104   | 4.173853661 | 3.607869541 | 1.962076848 | 2.037340523 | 0.711868228 | 2.832380548 | 7.464022234 | 5.816947841 |
| ENSMUSG000000090386 | 0.752036604  | 3.70823101   | 1.867222025 | 0.171793584 | 0.999071534 | 2810055G20Rik | Mir99ahg      |         | 4.000261912 | 4.446753331 | 9.89607239  | 12.62754339 | 5.363010051 | 3.419821592 | 3.559341141 | 8.428059192 | 22.15636074 | 15.49007459 |
| ENSMUSG000000036151 | 1.271820241  | -0.078889564 | 1.866692825 | 0.171854335 | 0.999071534 | Tm6sf2        | Tm6sf2        | TM6SF2  | 0.771980369 | 0.177870133 | 0.403921322 | 0.901967385 | 0.261610246 | 0.727621615 | 0           | 0.898071881 | 2.514196963 | 1.176461361 |
| ENSMUSG000000037788 | -0.306799401 | 5.362125499  | 1.866604401 | 0.171864489 | 0.999071534 | Vopp1         | Vopp1         | VOPP1   | 38.73937852 | 56.79986254 | 47.86467666 | 40.38038601 | 51.99503647 | 45.84016176 | 33.97552908 | 46.07799575 | 21.76351746 | 32.09125157 |
| ENSMUSG000000040990 | -0.333703848 | 6.763021509  | 1.865936979 | 0.171941149 | 0.999071534 | Sh3kbp1       | Sh3kbp1       | SH3KBP1 | 87.93558203 | 138.5015437 | 145.5463164 | 107.2647367 | 149.5102558 | 124.0594854 | 64.13285584 | 111.5681606 | 70.39751497 | 98.16916469 |
| ENSMUSG000000062054 | -0.379984934 | 3.847426709  | 1.86578254  | 0.171958893 | 0.999071534 | Iah1          | Iah1          | IAH1    | 17.54500839 | 18.85423412 | 12.72352164 | 19.98204669 | 14.32316099 | 14.5524323  | 11.907614   | 9.947873145 | 10.37106247 | 13.26786979 |
| ENSMUSG000000031461 | -1.320929218 | -0.352169305 | 1.86542045  | 0.172000504 | 0.999071534 | Myom2         | Myom2         | MYOM2   | 2.035220973 | 0.948640711 | 1.009803305 | 0.693821065 | 0.130805123 | 0.218286485 | 0.258861174 | 1.105319238 | 0.15713731  | 0           |
| ENSMUSG000000039364 | -1.134962558 | -0.073821307 | 1.865250617 | 0.172020025 | 0.999071534 | Sectm1b       | Sectm1b       | SECTM1  | 0.912340436 | 2.075151554 | 0.403921322 | 1.318260024 | 1.046440986 | 0.436572969 | 0.258861174 | 1.174401691 | 0           | 0.588230681 |
| ENSMUSG000000037243 | 0.412824985  | 4.137122762  | 1.864967317 | 0.172052594 | 0.999071534 | Zfp692        | Zfp692        | ZNF692  | 16.28176778 | 10.61291795 | 16.2241731  | 17.48429085 | 17.00466601 | 18.84539983 | 11.19574577 | 18.99767441 | 16.57798623 | 30.06512367 |
| ENSMUSG000000022579 | -0.432771195 | 4.402390328  | 1.863892283 | 0.172176246 | 0.999071534 | Gpilhb1       | Gpilhb1       | GPIHBP1 | 24.70337181 | 43.93392291 | 14.60848781 | 23.93682676 | 18.18191212 | 16.00767553 | 24.39766564 | 20.79381817 | 12.33527885 | 12.67963911 |
| ENSMUSG000000022175 | -0.314810276 | 7.014937292  | 1.863628635 | 0.172206587 | 0.999071534 | Lrp10         | Lrp10         | LRP10   | 138.8862864 | 158.7194489 | 142.382266  | 156.8035608 | 145.6515047 | 143.7780312 | 100.5028508 | 138.510317  | 76.13302679 | 104.1168305 |
| ENSMUSG000000005615 | -0.312615523 | 5.491284598  | 1.862792307 | 0.172302874 | 0.999071534 | Pcyt1a        | Pcyt1a        | PCYT1A  | 51.51214462 | 64.98188867 | 50.55748548 | 40.2416218  | 51.53721854 | 65.63146969 | 37.47015492 | 37.99534882 | 21.5278115  | 37.45068666 |
| ENSMUSG000000007805 | 1.177866699  | 0.530614661  | 1.862683369 | 0.17231542  | 0.999071534 | Twist2        | Twist2        | TWIST2  | 0.421080201 | 1.007930755 | 2.423527932 | 0           | 0.327012808 | 1.236956746 | 4.918362304 | 0.967154334 | 1.099961171 | 0.588230681 |
| ENSMUSG000000028522 | 0.289703523  | 5.911997276  | 1.862603207 | 0.172324653 | 0.999071534 | Mier1         | Mier1         | MIER1   | 49.75764378 | 63.49963756 | 52.10585054 | 51.48152306 | 64.15991293 | 60.24706974 | 73.32242751 | 72.60565747 | 56.33372571 | 53.72506882 |
| ENSMUSG000000009876 | -0.953463707 | 0.508826796  | 1.862426991 | 0.172344952 | 0.999071534 | Cox4i2        | Cox4i2        | COX4I2  | 0.771980369 | 1.778701332 | 1.88496617  | 2.567137942 | 1.700466601 | 0.873145938 | 1.423736457 | 1.105319238 | 0           | 0.915025503 |
| ENSMUSG000000034459 | -0.476179634 | 5.27338822   | 1.859912207 | 0.172634933 | 0.999071534 | Ifit1         | Ifit1         | IFIT1B  | 34.17767633 | 56.38483223 | 57.35682773 | 56.1995063  | 27.01125794 | 32.45192404 | 10.54859284 | 50.70652006 | 32.76312918 | 26.27430373 |
| ENSMUSG000000035105 | -0.476934706 | 6.030047159  | 1.859409274 | 0.172692994 | 0.999071534 | Eghn3         | Eghn3         | EGLN3   | 53.05610536 | 126.1692145 | 60.58819831 | 59.46046531 | 96.40337579 | 24.52084843 | 33.39309144 | 91.46516697 | 44.54842744 | 61.37206767 |
| ENSMUSG000000074415 | 0.485921899  | 6.627820193  | 1.858214207 | 0.172831048 | 0.999071534 | 2610203C20Rik | 2610203C20Rik |         | 74.74173572 | 42.51096184 | 135.1790024 | 87.9765111  | 85.28494032 | 61.84783729 | 56.82002767 | 125.3155686 | 139.7736374 | 148.3648494 |

|                      |              |              |             |             |             |               |               |            |             |             |             |             |             |             |             |             |             |             |
|----------------------|--------------|--------------|-------------|-------------|-------------|---------------|---------------|------------|-------------|-------------|-------------|-------------|-------------|-------------|-------------|-------------|-------------|-------------|
| ENSMUSG00000058006   | 0.330607301  | 4.807401182  | 1.85820529  | 0.172832079 | 0.999071534 | Mdn1          | Mdn1          | MDN1       | 22.31725067 | 24.48678834 | 29.41893629 | 20.74524986 | 31.52403469 | 45.98568608 | 23.94465859 | 21.89913741 | 26.71334273 | 33.59450776 |
| ENSMUSG000000022186  | 0.373721695  | 7.914824916  | 1.854673343 | 0.173240834 | 0.999071534 | Oxct1         | Oxct1         | OXCT1      | 209.20668   | 241.666221  | 207.9521606 | 203.2895722 | 229.6283938 | 241.5703763 | 380.5259257 | 192.3946299 | 266.1120348 | 216.3381725 |
| ENSMUSG000000022858  | 0.327758428  | 7.360681975  | 1.854321348 | 0.173281631 | 0.999071534 | Tra2b         | Tra2b         | TRA2B      | 158.0454355 | 129.3708769 | 158.5391189 | 153.8201302 | 155.7234992 | 204.0978631 | 221.9734566 | 141.4117801 | 155.4873684 | 160.8484116 |
| ENSMUSG000000042165  | -0.889584113 | 3.576712483  | 1.852719998 | 0.173467374 | 0.999071534 | Gm9774        | Gm9774        | ADRM1      | 27.44039311 | 9.249246928 | 7.741825339 | 12.48877918 | 23.21790937 | 20.08235658 | 8.801279913 | 5.664761096 | 0           | 9.150255031 |
| ENSMUSG000000083245  | -1.092301571 | 0.45624616   | 1.852499985 | 0.173492911 | 0.999071534 | Gm11185       | Gm11185       |            | 1.263240604 | 2.490181865 | 2.288887492 | 0.069382107 | 2.681505025 | 0.509335131 | 0.323576467 | 0.967154334 | 0.15713731  | 1.830051006 |
| ENSMUSG000000074785  | -0.629178973 | 2.415064508  | 1.850821905 | 0.173687832 | 0.999071534 | Plknc1        | Plknc1        | PLXNC1     | 6.175842952 | 13.10309981 | 3.90457278  | 5.550568524 | 4.054958819 | 8.14936209  | 3.494625848 | 4.490359406 | 1.964216377 | 2.548999616 |
| ENSMUSG000000020865  | -0.556535441 | 3.798294145  | 1.850200968 | 0.173760022 | 0.999071534 | Abcc3         | Abcc3         |            | 19.72058943 | 26.97697021 | 12.52156098 | 10.47669809 | 16.02362759 | 26.77647544 | 14.30207986 | 7.460904859 | 3.8498641   | 5.555511983 |
| ENSMUSG000000020063  | 0.336213785  | 4.87728265   | 1.849987152 | 0.173784889 | 0.999071534 | Sirt1         | Sirt1         | SIRT1      | 24.00157147 | 34.80325607 | 24.03331866 | 20.88401407 | 31.0008142  | 31.21496729 | 28.53944442 | 42.48570822 | 28.59899046 | 25.2285603  |
| ENSMUSG000000044122  | 1.486051506  | -0.030216715 | 1.847245509 | 0.174104098 | 0.999071534 | Proca1        | Proca1        | PROCA1     | 0           | 0.059290044 | 1.346404407 | 0           | 0.981038424 | 0.291048646 | 0.582437641 | 0.552659619 | 2.514196963 | 1.764692042 |
| ENSMUSG000000074862  | 0.770281676  | 1.495307099  | 1.847047054 | 0.17412723  | 0.999071534 | BC025920      | BC025920      |            | 2.245761073 | 1.422961066 | 2.288887492 | 0.832585279 | 3.662543449 | 1.091432423 | 1.941458804 | 3.937699786 | 3.928432755 | 4.771204409 |
| ENSMUSG000000087178  | 1.033069314  | 0.462953889  | 1.846942262 | 0.174139447 | 0.999071534 | A230056P14Rik | A230056P14Rik |            | 0.070180034 | 1.304380977 | 0.134640441 | 1.248877918 | 1.438856355 | 2.328389169 | 2.78275762  | 0.690824524 | 0.942823861 | 1.568615148 |
| ENSMUSG000000031231  | 0.450175642  | 8.353085811  | 1.846270151 | 0.174217822 | 0.999071534 | Cox7b         | Cox7b         |            | 305.9147662 | 184.0955879 | 300.0462221 | 362.5215067 | 274.1021356 | 175.5023336 | 409.0653701 | 360.4031541 | 427.6491897 | 376.1408407 |
| ENSMUSG000000001622  | 1.214676784  | 0.659127818  | 1.846213023 | 0.174224485 | 0.999071534 | Csn3          | Csn3          | CSN3       | 1.684320805 | 0.296450222 | 0.605881983 | 1.457024238 | 0.39241537  | 8.076599929 | 0.258861174 | 0.138164905 | 0.31427462  | 2.352922722 |
| ENSMUSG000000032307  | 0.339412546  | 4.914944452  | 1.846067495 | 0.174241462 | 0.999071534 | Ube2q2        | Ube2q2        | UBE2Q2     | 29.19489395 | 32.3130742  | 22.8215547  | 23.03485937 | 30.73920395 | 34.05269159 | 47.630456   | 31.36343339 | 27.73473525 | 20.91486864 |
| ENSMUSG000000028064  | -0.602357083 | 3.531970062  | 1.846057389 | 0.174242641 | 0.999071534 | Sema4a        | Sema4a        | SEMA4A     | 26.03679244 | 18.20204363 | 12.2522801  | 7.423885401 | 8.240722761 | 22.1196971  | 7.959981098 | 5.388431287 | 2.749902928 | 9.084896066 |
| ENSMUSG000000029554  | -0.405444343 | 4.926079948  | 1.845599162 | 0.174296107 | 0.999071534 | Mad1l1        | Mad1l1        | MAD1L1     | 41.75711996 | 31.00869322 | 36.62219987 | 29.6261595  | 40.68039331 | 49.69655632 | 29.63960441 | 23.0735391  | 7.621159544 | 23.13707343 |
| ENSMUSG000000023353  | -0.305302698 | 5.822211819  | 1.844266615 | 0.174451696 | 0.999071534 | Agap3         | Agap3         | AGAP3      | 64.91653103 | 67.11633027 | 60.25159721 | 55.0893926  | 77.56743805 | 75.23607501 | 45.30070544 | 51.46642703 | 23.9634398  | 55.81655569 |
| ENSMUSG000000071072  | 0.368937436  | 8.608336634  | 1.843715373 | 0.174516106 | 0.999071534 | Ptges3        | Ptges3        | PTGES3     | 296.6510018 | 285.8965941 | 393.823289  | 368.55775   | 420.2768608 | 366.0664346 | 450.4831579 | 431.2126678 | 449.7269818 | 382.0231475 |
| ENSMUSG000000018574  | -0.294290381 | 5.986469558  | 1.842508187 | 0.174657257 | 0.999071534 | Acadvl        | Acadvl        | ACADVL     | 78.18055737 | 96.40561221 | 61.53068139 | 53.9792789  | 73.38167411 | 71.6707291  | 63.61513349 | 54.09156022 | 37.24154252 | 52.09109471 |
| ENSMUSG000000027981  | 0.366420532  | 4.590607192  | 1.842365139 | 0.174673991 | 0.999071534 | Rnpc3         | Rnpc3         | RNPC3      | 15.72032751 | 18.97281421 | 27.39932968 | 25.4632331  | 20.53640434 | 23.64770249 | 21.29133155 | 24.59335305 | 28.04900987 | 30.26120057 |
| ENSMUSG000000023045  | 0.791656377  | 1.359385303  | 1.839714551 | 0.174984407 | 0.999071534 | Soat2         | Soat2         | SOAT2      | 2.666841275 | 2.193731643 | 1.615685288 | 0.901967385 | 1.962076848 | 1.45524323  | 1.035444696 | 2.694215643 | 2.592765618 | 6.797332309 |
| ENSMUSG000000022090  | -0.320742342 | 6.148275145  | 1.839666106 | 0.174990087 | 0.999071534 | Pdlim2        | Pdlim2        | PDLIM2     | 90.8129634  | 68.18355107 | 70.8208718  | 95.19225019 | 82.21101993 | 73.63530746 | 71.70454518 | 65.97374204 | 29.07040239 | 70.06480995 |
| ENSMUSG000000073412  | -0.367101425 | 4.403906199  | 1.839485252 | 0.175011291 | 0.999071534 | Lst1          | Lst1          | LST1       | 22.3874307  | 18.26133368 | 34.06403149 | 28.09975315 | 19.55536592 | 23.72046466 | 13.26663516 | 15.12905707 | 16.57798623 | 20.39199693 |
| ENSMUSG000000003402  | -0.352697287 | 6.973242783  | 1.838265702 | 0.175154354 | 0.999071534 | PrkcsH        | PrkcsH        | PRKCSH     | 165.344159  | 161.3282108 | 122.3881606 | 145.4942774 | 136.4951461 | 171.7914634 | 138.4260128 | 97.26809297 | 47.45546768 | 98.49595951 |
| ENSMUSG000000020255  | 0.301504642  | 5.460216578  | 1.838111551 | 0.175172446 | 0.999071534 | D10Wsu102e    | D10Wsu102e    | C12orf45   | 40.21315922 | 51.76020877 | 37.02612119 | 30.52812688 | 45.52018287 | 67.59604805 | 55.84929827 | 43.52194501 | 28.75612777 | 43.98658311 |
| ENSMUSG0000000039899 | -0.511648285 | 4.690905003  | 1.837371455 | 0.175259341 | 0.999071534 | Fgl2          | Fgl2          | FGL2       | 55.30186643 | 41.97735144 | 15.82025178 | 19.14946141 | 25.96481695 | 38.56394561 | 33.7813832  | 14.16190274 | 9.428238612 | 11.50317775 |
| ENSMUSG000000038010  | 0.626732753  | 2.383085839  | 1.836653515 | 0.175343683 | 0.999071534 | Ccdc138       | Ccdc138       | CCDC138    | 2.245761073 | 4.150303108 | 3.837252559 | 6.383153803 | 3.924153696 | 3.492583753 | 4.46535525  | 8.35897674  | 3.299883514 | 9.934562605 |
| ENSMUSG000000078350  | -1.060226794 | 0.59877833   | 1.836286715 | 0.175386791 | 0.999071534 | Smim1         | Smim1         | SMIM1      | 2.596661241 | 0.948640711 | 0.403921322 | 4.371072713 | 1.177246109 | 1.746291877 | 1.164875283 | 0.690824524 | 0           | 0.980384468 |
| ENSMUSG000000036103  | -0.336609527 | 6.295929513  | 1.836218689 | 0.175394787 | 0.999071534 | Colec12       | Colec12       | COLEC12    | 55.8633067  | 118.1057685 | 75.86988833 | 94.84533965 | 109.353083  | 72.03453991 | 75.19917102 | 85.10958135 | 43.9198782  | 60.52240113 |
| ENSMUSG000000032026  | 0.310367318  | 5.748495619  | 1.834836173 | 0.175557387 | 0.999071534 | Rexo2         | Rexo2         | REXO2      | 44.3537812  | 43.28173242 | 53.78885605 | 50.09388093 | 56.90022859 | 80.98428577 | 79.92338745 | 37.23544184 | 44.78413341 | 48.69242856 |
| ENSMUSG000000030276  | 0.692778601  | 3.309937524  | 1.83322244  | 0.175747401 | 0.999071534 | Ttlb3         | Ttlb3         | ARPC4-TTL3 | 5.75476275  | 3.023792265 | 10.9058757  | 8.672763319 | 10.39900729 | 4.29296753  | 3.041618794 | 15.75079915 | 16.65654888 | 15.22863873 |
| ENSMUSG000000024789  | -0.318313787 | 5.142198563  | 1.833217944 | 0.17574793  | 0.999071534 | Jak2          | Jak2          | JAK2       | 45.1959416  | 48.32138619 | 39.11304802 | 25.393851   | 46.04304336 | 48.45959957 | 32.7459385  | 27.49481605 | 19.17075184 | 27.71220095 |
| ENSMUSG000000016921  | 0.330103619  | 7.704958534  | 1.833145957 | 0.175756412 | 0.999071534 | Srsf6         | Srsf6         | SRSF6      | 191.9423917 | 148.9958816 | 211.722093  | 186.5684845 | 220.0142172 | 263.1807382 | 243.3942188 | 199.9936997 | 184.7934768 | 234.5733236 |
| ENSMUSG000000027222  | -0.410155451 | 3.469612161  | 1.83297343  | 0.175776742 | 0.999071534 | Pex16         | Pex16         | PEX16      | 13.19384631 | 12.21374915 | 12.5888812  | 15.74973819 | 10.79142266 | 12.22404314 | 8.9307105   | 7.046410144 | 7.778296855 | 9.803844676 |
| ENSMUSG000000085635  | 1.13801233   | 0.027189821  | 1.832790296 | 0.175798325 | 0.999071534 | Gm14565       | Gm14565       |            | 0.631620302 | 0.355740266 | 1.279084186 | 0.069382107 | 0.588623054 | 0.654859454 | 0.19414588  | 0.898071881 | 1.571373102 | 2.418281687 |
| ENSMUSG000000039759  | -0.409874308 | 3.708174657  | 1.832172467 | 0.17587116  | 0.999071534 | Thap3         | Thap3         | THAP3      | 16.14140771 | 12.33232924 | 15.28169002 | 16.09664872 | 16.74305577 | 18.40882687 | 11.38989165 | 6.908245239 | 6.206923753 | 12.67963911 |
| ENSMUSG000000031532  | -0.342344341 | 7.232437521  | 1.8317561   | 0.175920264 | 0.999071534 | Tmem66        | Saraf         | SARAF      | 156.5014748 | 240.9547405 | 137.1986091 | 168.1128442 | 169.7196473 | 136.1380042 | 144.3151045 | 153.3630443 | 81.16142072 | 129.4761087 |
| ENSMUSG000000020290  | 0.324808203  | 7.682625362  | 1.831315226 | 0.175972276 | 0.999071534 | Xpo1          | Xpo1          | XPO1       | 185.4858287 | 198.0287483 | 165.8097027 | 186.221574  | 211.3156765 | 253.2850843 | 246.8241293 | 225.6232895 | 185.5791633 | 192.5475094 |
| ENSMUSG000000009013  | 0.412683805  | 8.611732973  | 1.831120177 | 0.175995293 | 0.999071534 | Dynl1         | Dynl1         |            | 341.9171234 | 213.7999001 | 398.401064  | 396.1718284 | 386.0059185 | 297.6700028 | 449.3182826 | 380.85156   | 524.2886355 | 430.6502171 |

|                     |              |              |             |             |             |               |               |          |             |             |             |             |             |             |             |             |             |             |
|---------------------|--------------|--------------|-------------|-------------|-------------|---------------|---------------|----------|-------------|-------------|-------------|-------------|-------------|-------------|-------------|-------------|-------------|-------------|
| ENSMUSG00000024248  | -0.349640537 | 7.287793326  | 1.829316899 | 0.176208251 | 0.999071534 | Cox7a2l       | Cox7a2l       | COX7A2L  | 222.3303463 | 207.2187052 | 147.8352039 | 154.8608618 | 178.876006  | 179.5042525 | 171.6896736 | 128.5624439 | 65.91910163 | 135.1623386 |
| ENSMUSG000000026281 | 0.350815298  | 6.399062591  | 1.829053168 | 0.176239421 | 0.999071534 | Dtymk         | Dtymk         | DTYMK    | 86.46180132 | 47.1355853  | 85.42935961 | 92.41696592 | 71.41959726 | 88.47878841 | 131.6309069 | 63.14136149 | 81.23998937 | 89.28034551 |
| ENSMUSG000000078784 | 0.404788275  | 6.367446068  | 1.828281348 | 0.176330679 | 0.999071534 | 1810022K09Rik | 1810022K09Rik | C8orf59  | 71.58363421 | 44.40824326 | 90.74765702 | 98.66135551 | 59.97414898 | 58.35525354 | 90.53669558 | 77.44142913 | 116.9887274 | 92.35221685 |
| ENSMUSG000000002477 | 0.372529547  | 7.07560109   | 1.827883221 | 0.176377774 | 0.999071534 | Snrpd1        | Snrpd1        | SNRPD1   | 104.1471698 | 81.40523097 | 169.1083935 | 136.9602783 | 115.3047161 | 116.1284098 | 188.0626429 | 125.4537335 | 136.5523226 | 156.8615148 |
| ENSMUSG000000048039 | 0.282634143  | 5.359119464  | 1.827512826 | 0.176421601 | 0.999071534 | Isq20l2       | Isq20l2       | ISG20L2  | 35.79181711 | 32.49094434 | 44.76794653 | 37.32757332 | 41.13821124 | 56.39067518 | 42.45323252 | 41.03497672 | 39.91287679 | 37.77748148 |
| ENSMUSG000000035596 | -0.398751898 | 4.6623364    | 1.827251366 | 0.176452546 | 0.999071534 | Mboat7        | Mboat7        | MBOAT7   | 33.2653359  | 40.37652024 | 24.43723998 | 18.31687613 | 33.42070898 | 38.70946993 | 24.00937388 | 21.55372515 | 8.721120716 | 16.92797181 |
| ENSMUSG000000097095 | 1.06556752   | 0.739739032  | 1.827251225 | 0.176452562 | 0.999071534 | Gm26547       | Gm26547       |          | 1.403600671 | 0.355740266 | 0           | 1.734552664 | 1.700466601 | 0.654859454 | 1.229590576 | 2.141556024 | 3.064177549 | 2.483640651 |
| ENSMUSG000000096947 | 0.934302292  | 0.413358451  | 1.827209216 | 0.176457535 | 0.999071534 | Gm26723       | Gm26723       |          | 0.491260235 | 0.711480533 | 1.144443746 | 1.040731598 | 0.915635862 | 0.436572969 | 0.776583522 | 2.279720929 | 2.592765618 | 1.111102397 |
| ENSMUSG000000019761 | 0.502480613  | 3.412483507  | 1.82682179  | 0.176503401 | 0.999071534 | Krt10         | Krt10         | KRT10    | 10.31646493 | 5.929004441 | 10.36731393 | 8.950291745 | 9.614176555 | 8.949745867 | 8.154126978 | 11.19135729 | 18.46363395 | 9.999921569 |
| ENSMUSG000000001946 | -0.32711453  | 5.263421615  | 1.826583293 | 0.176531644 | 0.999071534 | Esam          | Esam          | ESAM     | 41.68693992 | 41.14729082 | 56.81826597 | 46.34724717 | 34.46714996 | 48.9689347  | 44.78298309 | 26.59674417 | 20.27071302 | 27.71220095 |
| ENSMUSG000000025839 | 1.612640394  | -0.440877077 | 1.826012483 | 0.176599258 | 0.999071534 | Pramel7       | Pramel7       | PRAMEF25 | 0.140360067 | 0.296450222 | 0.875162864 | 0.277528426 | 0           | 0           | 0.064715293 | 0.27632981  | 2.278490998 | 1.503256184 |
| ENSMUSG000000035351 | 0.350504958  | 5.304890769  | 1.825748416 | 0.176630548 | 0.999071534 | Nup37         | Nup37         | NUP37    | 47.58206274 | 29.34857198 | 30.02481827 | 35.73178487 | 37.34486267 | 44.31215637 | 72.61055928 | 30.39627905 | 30.56320683 | 36.73173805 |
| ENSMUSG000000022324 | -0.365665113 | 6.95144026   | 1.824584129 | 0.176768583 | 0.999071534 | Matn2         | Matn2         | MATN2    | 98.60294713 | 134.5884008 | 150.9992542 | 210.7134576 | 120.6023236 | 125.9513016 | 75.52274749 | 92.4323213  | 109.2104306 | 115.0971365 |
| ENSMUSG000000035048 | 0.377971359  | 5.460367639  | 1.823100681 | 0.176944637 | 0.999071534 | Anapc13       | Anapc13       | ANAPC13  | 35.37073691 | 29.70431225 | 40.19017154 | 48.56747458 | 43.49270346 | 25.9033295  | 43.35924663 | 56.09495134 | 48.79113482 | 57.84268359 |
| ENSMUSG000000047921 | -0.513315427 | 4.37834789   | 1.823076137 | 0.176947552 | 0.999071534 | Trappc9       | Trappc9       | TRAPPC9  | 31.37047499 | 42.21451162 | 13.32940363 | 19.91266458 | 19.88237873 | 42.49310233 | 13.71964222 | 10.22420295 | 6.678335683 | 15.49007459 |
| ENSMUSG000000035184 | 1.174272296  | -0.209077497 | 1.822924314 | 0.176965582 | 0.999071534 | Fam124a       | Fam124a       | FAM124A  | 0.701800335 | 0.177870133 | 0.269280881 | 0.763203172 | 0.457817931 | 0.291048646 | 0.19414588  | 0.483577167 | 1.885647722 | 1.830051006 |
| ENSMUSG000000004633 | -1.057967571 | 0.421766721  | 1.819619451 | 0.177358581 | 0.999071534 | Chn2          | Chn2          | CHN2     | 3.017741442 | 2.312311732 | 0.875162864 | 1.734552664 | 0.457817931 | 2.110102684 | 1.035444696 | 0.483577167 | 0           | 0.457512752 |
| ENSMUSG000000021643 | 0.525811761  | 4.774370479  | 1.818264186 | 0.177520034 | 0.999071534 | Serf1         | Serf1         | SERF1B   | 14.87816711 | 16.89766266 | 25.64900395 | 35.03796381 | 22.23687094 | 12.2968053  | 20.19117157 | 43.3837801  | 46.27693785 | 23.39850929 |
| ENSMUSG000000044442 | 0.524133696  | 2.551825162  | 1.818218588 | 0.17752547  | 0.999071534 | N6amt1        | N6amt1        | N6AMT1   | 4.631882214 | 4.921073686 | 6.799342255 | 3.052812688 | 5.101399804 | 5.529924276 | 8.671849326 | 5.388431287 | 6.835472994 | 5.686229912 |
| ENSMUSG000000042043 | 0.429583625  | 8.086960658  | 1.817778021 | 0.177577993 | 0.999071534 | Tbca          | Tbca          | TBCA     | 231.5239307 | 173.7198301 | 263.1547413 | 299.2450255 | 228.25494   | 162.5506688 | 300.6025382 | 311.0782831 | 365.1085402 | 305.4878001 |
| ENSMUSG000000092918 | 2.067214879  | -1.078329627 | 1.816718604 | 0.177704367 | 0.999071534 | Gm24081       | Gm24081       |          | 0           | 0.118580089 | 0           | 0.555056852 | 0           | 0           | 0           | 0.27632981  | 1.257098482 | 1.045743432 |
| ENSMUSG000000025940 | 0.411472366  | 5.421404838  | 1.816248034 | 0.177760533 | 0.999071534 | Tmem70        | Tmem70        | TMEM70   | 57.96870771 | 31.54230362 | 31.03462158 | 28.79357422 | 42.18465223 | 47.6592158  | 94.35489789 | 33.0904947  | 26.79191139 | 36.79709702 |
| ENSMUSG000000024222 | -0.37843621  | 5.893270047  | 1.815845876 | 0.17780855  | 0.999071534 | Fkbp5         | Fkbp5         | FKBP5    | 48.98566341 | 75.77267675 | 69.47446739 | 91.02932379 | 60.30116179 | 86.58697221 | 34.23439025 | 25.9750021  | 45.64838861 | 62.09101628 |
| ENSMUSG000000034158 | -0.357210009 | 6.581965927  | 1.815186348 | 0.177887329 | 0.999071534 | Lrrc58        | Lrrc58        | LRRCS8   | 77.05767683 | 125.0427037 | 121.4456775 | 104.1425419 | 130.1510976 | 95.82776672 | 57.92018766 | 130.3585877 | 49.57682137 | 75.09745022 |
| ENSMUSG000000091705 | -0.713651341 | 3.86125656   | 1.81404564  | 0.178023678 | 0.999071534 | H2-Q2         | H2-Q2         |          | 24.91391191 | 32.19449411 | 5.183656966 | 12.21125075 | 19.09754799 | 26.99476192 | 15.53167044 | 8.635306549 | 1.335667137 | 4.901922338 |
| ENSMUSG000000097397 | 1.016912166  | 0.216797338  | 1.813713366 | 0.178063418 | 0.999071534 | Gm16861       | Gm16861       |          | 0.631620302 | 0.830060622 | 0.673202203 | 0.624438959 | 0.850233301 | 0.291048646 | 0.906014109 | 1.036236786 | 3.221314859 | 0.71894861  |
| ENSMUSG000000025332 | -0.350576937 | 5.93403896   | 1.812603864 | 0.178196187 | 0.999071534 | Kdm5c         | Kdm5c         | KDM5C    | 80.35613841 | 97.35425292 | 57.15486707 | 45.584044   | 76.978815   | 93.49937756 | 44.52412191 | 60.99980546 | 31.19175607 | 38.10427631 |
| ENSMUSG000000036450 | -0.488352885 | 3.827016252  | 1.812240747 | 0.178239665 | 0.999071534 | Hif1an        | Hif1an        | HIF1AN   | 19.86094949 | 23.3602775  | 14.67580803 | 12.28063286 | 15.43500454 | 27.14028625 | 9.772009315 | 9.878790692 | 3.771295445 | 9.999921569 |
| ENSMUSG000000085525 | 0.925809138  | 1.639684251  | 1.811828792 | 0.178289005 | 0.999071534 | Gm13166       | Gm13166       |          | 2.456301174 | 0.830060622 | 4.375814322 | 1.248877918 | 1.896674286 | 1.018670261 | 0.517722348 | 4.214029596 | 7.6997282   | 3.92153787  |
| ENSMUSG000000068036 | 0.343449873  | 6.349139093  | 1.811118168 | 0.178374153 | 0.999071534 | Mllt4         | Mllt4         | MLLT4    | 60.00392868 | 69.78438227 | 88.39144931 | 62.30513168 | 92.67542978 | 104.3409396 | 48.73061599 | 119.5817251 | 76.68300738 | 89.28034551 |
| ENSMUSG000000001999 | 0.357383853  | 5.151362316  | 1.810403487 | 0.178459835 | 0.999071534 | Blvra         | Blvra         | BLVRA    | 47.02062247 | 30.23792265 | 22.14835249 | 33.71970378 | 28.12310149 | 41.91100504 | 58.04961825 | 26.59674417 | 33.86309035 | 31.63373882 |
| ENSMUSG000000036353 | 0.35195438   | 6.21345045   | 1.81025411  | 0.17847775  | 0.999071534 | P2ry12        | P2ry12        | P2RY12   | 50.81034428 | 49.50718708 | 81.79406772 | 76.52846352 | 77.95985342 | 58.64630219 | 86.97735444 | 83.5897674  | 89.25399219 | 71.30663027 |
| ENSMUSG000000019857 | 0.363174347  | 5.375280577  | 1.810140362 | 0.178491393 | 0.999071534 | Asf1a         | Asf1a         | ASF1A    | 36.49361744 | 22.41163679 | 42.81566014 | 45.37589768 | 39.96096514 | 31.21496729 | 50.93093597 | 41.58763634 | 50.12680195 | 44.50945483 |
| ENSMUSG000000050174 | 0.670908023  | 1.970295167  | 1.809605214 | 0.178555595 | 0.999071534 | Nudt6         | Nudt6         | NUDT6    | 1.333420637 | 2.490181865 | 4.241173882 | 3.81601586  | 3.204725518 | 2.037340523 | 5.953807    | 3.730452429 | 5.892649132 | 3.92153787  |
| ENSMUSG000000097177 | 0.5657995    | 3.153136589  | 1.809018006 | 0.178626074 | 0.999071534 | 9330159M07Rik | 9330159M07Rik |          | 8.211063924 | 5.869714396 | 9.020909526 | 7.285121188 | 6.278645913 | 5.457162114 | 8.9307105   | 5.388431287 | 17.04939816 | 10.78422914 |
| ENSMUSG000000038347 | 0.738690154  | 1.456093242  | 1.808630998 | 0.178672542 | 0.999071534 | Tcte2         | Tcte2         |          | 3.579181711 | 2.54947191  | 1.615685288 | 1.179495811 | 1.308051232 | 2.692199976 | 1.423736457 | 6.079255811 | 1.649941757 | 3.92153787  |
| ENSMUSG000000079083 | 0.443559225  | 3.536964528  | 1.80859497  | 0.178676868 | 0.999071534 | Jrkl          | Jrkl          | JRKL     | 10.38664496 | 7.766995817 | 11.64639812 | 7.562649614 | 13.34212257 | 11.49642152 | 10.28973166 | 18.23776743 | 8.092571475 | 15.68615148 |
| ENSMUSG000000045328 | 0.361287486  | 5.772842561  | 1.808492747 | 0.178689145 | 0.999071534 | Cenpe         | Cenpe         | CENPE    | 45.33630167 | 35.04041624 | 54.66401892 | 52.79978308 | 59.64713618 | 90.87993974 | 48.6659007  | 31.15618603 | 71.57604479 | 53.98650468 |
| ENSMUSG000000078485 | 0.561785347  | 4.338708075  | 1.808219456 | 0.178721971 | 0.999071534 | Plekhn1       | Plekhn1       | PLEKHN1  | 13.47456644 | 17.90559341 | 19.72482456 | 13.7376571  | 19.62076848 | 7.421740475 | 8.865995207 | 40.82772936 | 18.30649664 | 36.47030219 |

|                     |              |              |             |             |             |               |               |         |             |             |             |             |             |             |             |             |             |             |
|---------------------|--------------|--------------|-------------|-------------|-------------|---------------|---------------|---------|-------------|-------------|-------------|-------------|-------------|-------------|-------------|-------------|-------------|-------------|
| ENSMUSG00000093190  | 1.295184157  | -0.398961021 | 1.808207489 | 0.178723408 | 0.999071534 | Gm22875       | Gm22875       |         | 0.701800335 | 0           | 0.538561763 | 0.416292639 | 0.261610246 | 0.436572969 | 0.388291761 | 0.138164905 | 1.571373102 | 1.633974113 |
| ENSMUSG00000005374  | -0.281192138 | 5.264261981  | 1.808146324 | 0.178730756 | 0.999071534 | Tbl2          | Tbl2          | TBL2    | 46.4591822  | 53.59820014 | 37.83396383 | 40.72729654 | 39.69935489 | 41.54719423 | 30.86919499 | 34.33397884 | 25.14196963 | 36.53566116 |
| ENSMUSG000000097180 | 0.596814264  | 2.00851305   | 1.807883977 | 0.178762275 | 0.999071534 | 2700038G22Rik | 2700038G22Rik |         | 2.807201342 | 2.253021687 | 3.567971678 | 5.134275885 | 2.158284533 | 4.147443207 | 4.27120937  | 3.730452429 | 4.792687961 | 5.359435089 |
| ENSMUSG000000082580 | -1.46554473  | 2.205240831  | 1.807022504 | 0.178865822 | 0.999071534 | Gm13182       | Gm13182       |         | 23.36995117 | 0           | 0           | 9.435966491 | 1.308051232 | 3.710870238 | 5.047792891 | 0.345412262 | 1.099961171 | 1.764692042 |
| ENSMUSG00000026637  | 0.332724285  | 4.96289408   | 1.805000881 | 0.179109087 | 0.999071534 | Traf5         | Traf5         | TRAF5   | 30.17741442 | 17.84630337 | 26.45684659 | 38.02139439 | 29.43115272 | 36.38108076 | 35.26983495 | 27.14940379 | 30.0917949  | 37.84284045 |
| ENSMUSG000000096171 | -1.218225026 | -0.66126278  | 1.804287748 | 0.17919499  | 0.999071534 | Gm8055        | Gm8055        |         | 0.140360067 | 1.007930755 | 0.673202203 | 0.416292639 | 1.373453794 | 0.072762162 | 0.129430587 | 0.27632981  | 0.471411931 | 0.392153787 |
| ENSMUSG00000029253  | 0.324554316  | 4.679000121  | 1.803587671 | 0.179279367 | 0.999071534 | Cenpc1        | Cenpc1        | CENPC   | 22.73833087 | 24.9611087  | 22.08103227 | 16.72108768 | 31.58943725 | 29.61419974 | 32.29293145 | 26.59674417 | 25.45624425 | 22.22204793 |
| ENSMUSG000000086968 | 0.83689616   | 0.954908043  | 1.803254875 | 0.179319494 | 0.999071534 | 4933431E20Rik | 4933431E20Rik |         | 1.052700503 | 0.652190488 | 2.221567271 | 1.318260024 | 1.504258917 | 1.382481069 | 0.647152935 | 1.657978857 | 2.907040239 | 4.248332693 |
| ENSMUSG000000025195 | -0.666753424 | 2.765604104  | 1.80200653  | 0.179470104 | 0.999071534 | Dnmbp         | Dnmbp         | DNMBP   | 11.64988557 | 12.33232924 | 5.92417939  | 4.579219032 | 8.306125323 | 13.38823772 | 4.530070544 | 5.733843549 | 1.571373102 | 1.633974113 |
| ENSMUSG000000067279 | -1.355058749 | -0.101151441 | 1.801575923 | 0.17952209  | 0.999071534 | Ppp1r3c       | Ppp1r3c       | PPP1R3C | 1.614140771 | 2.193731643 | 1.077123525 | 0.832585279 | 0.261610246 | 0           | 0.388291761 | 0.345412262 | 1.178529826 | 0           |
| ENSMUSG000000089842 | 1.271676248  | -0.358829991 | 1.800594444 | 0.179640646 | 0.999071534 | Gm16338       | Pitpnm2os2    |         | 0.070180034 | 0.592900444 | 0.06732022  | 0.416292639 | 0.850233301 | 0.072762162 | 0.711868228 | 0.483577167 | 1.571373102 | 1.372538255 |
| ENSMUSG000000083154 | -0.652345042 | 1.738201766  | 1.800529011 | 0.179648553 | 0.999071534 | Gm11892       | Gm11892       |         | 2.947561409 | 4.861783641 | 4.173853661 | 3.191576901 | 5.166802366 | 3.710870238 | 3.494625848 | 2.832380548 | 1.414235792 | 0.849666539 |
| ENSMUSG00000033318  | 0.575748012  | 2.513085309  | 1.797558322 | 0.180007962 | 0.999071534 | Gstt2         | Gstt2         | GSTT2B  | 8.281243958 | 2.253021687 | 3.433331237 | 5.134275885 | 4.185763942 | 5.529924276 | 6.665675228 | 4.62852431  | 6.992610304 | 7.843075741 |
| ENSMUSG000000086075 | 0.866845139  | 0.390738523  | 1.797173514 | 0.180054579 | 0.999071534 | Gm15728       | Gm15728       |         | 0.350900168 | 0.592900444 | 1.144443746 | 0.832585279 | 1.438856355 | 0.9459081   | 1.035444696 | 1.519813953 | 2.121353688 | 1.503256184 |
| ENSMUSG00000038538  | 0.473979163  | 5.595476195  | 1.796453697 | 0.180141818 | 0.999071534 | Ubn2          | Ubn2          | UBN2    | 32.07227533 | 28.93354167 | 57.49146817 | 50.30202725 | 39.5031472  | 36.52660508 | 18.18499747 | 60.23989849 | 71.02606421 | 73.39811714 |
| ENSMUSG00000058057  | 0.867193102  | 1.157483966  | 1.795538543 | 0.1802528   | 0.999071534 | Mettl7a3      | Mettl7a3      | METTL7A | 0.561440268 | 1.363671021 | 2.288887492 | 2.428373729 | 1.046440986 | 1.528005392 | 1.423736457 | 1.105319238 | 5.814080477 | 2.352922722 |
| ENSMUSG000000069678 | 0.478444304  | 3.058364461  | 1.794883561 | 0.18033228  | 0.999071534 | Pcgf1         | Pcgf1         | PCGF1   | 5.824942784 | 6.166164618 | 9.424830848 | 6.244389589 | 7.913709953 | 6.112021568 | 10.28973166 | 9.80970824  | 9.349669957 | 9.411690889 |
| ENSMUSG00000051853  | -0.325005281 | 7.349700632  | 1.794526844 | 0.180375584 | 0.999071534 | Arf3          | Arf3          | ARF3    | 195.3110333 | 215.4600214 | 185.6691677 | 152.2243418 | 195.0958412 | 222.2156413 | 109.9512836 | 134.3653699 | 104.1820367 | 143.659004  |
| ENSMUSG00000020400  | -0.339895169 | 4.847068581  | 1.792542653 | 0.180616673 | 0.999071534 | Tnlp1         | Tnlp1         | TNIP1   | 39.58153892 | 40.96942069 | 23.69671756 | 26.22643628 | 36.49462937 | 38.92775641 | 18.12028217 | 28.53105284 | 15.00661312 | 24.83640651 |
| ENSMUSG00000025997  | 0.473248521  | 3.952216967  | 1.792211013 | 0.180657005 | 0.999071534 | Ikzf2         | Ikzf2         | IKZF2   | 10.31646493 | 12.98451973 | 17.97449883 | 13.11321814 | 12.16487646 | 14.11585934 | 8.089411685 | 23.0735391  | 23.72773384 | 13.72538255 |
| ENSMUSG000000068523 | 0.446428343  | 7.633541536  | 1.79195689  | 0.180687917 | 0.999071534 | Gng5          | Gng5          | GNNG5   | 109.4106723 | 136.3078121 | 222.2240473 | 200.7224342 | 199.4124103 | 114.2365936 | 171.3660971 | 268.7998223 | 245.7627531 | 262.9391142 |
| ENSMUSG00000079293  | -0.594461877 | 4.059886813  | 1.791661312 | 0.18072388  | 0.999071534 | Clec7a        | Clec7a        | CLEC7A  | 52.84556526 | 23.3602775  | 14.60848781 | 6.105625376 | 7.848307392 | 17.0263458  | 14.56094103 | 10.98410993 | 11.15674902 | 10.39207536 |
| ENSMUSG00000021978  | -0.288200415 | 6.022030461  | 1.790812628 | 0.180827184 | 0.999071534 | Extl3         | Extl3         | EXTL3   | 65.96923153 | 94.15259052 | 69.00322585 | 65.91300122 | 75.67076377 | 86.07763708 | 55.71986769 | 55.19687946 | 36.22015    | 55.88191465 |
| ENSMUSG000000003153 | -0.777630428 | 1.94975369   | 1.789614589 | 0.180973128 | 0.999071534 | Slc2a3        | Slc2a3        | SLC2A14 | 6.947823321 | 10.0200175  | 1.615685288 | 1.595788451 | 4.51277675  | 3.565345915 | 4.530070544 | 2.072473572 | 0.549980586 | 3.006512367 |
| ENSMUSG000000021774 | 0.327410673  | 6.414965892  | 1.789424741 | 0.180996268 | 0.999071534 | Ube2e1        | Ube2e1        | UBE2E1  | 71.23273404 | 62.13596654 | 88.93001107 | 91.02932379 | 77.37123037 | 73.70806962 | 101.0205731 | 72.74382237 | 98.76079946 | 101.5678308 |
| ENSMUSG000000070425 | -1.164453769 | 0.426689858  | 1.789290089 | 0.181012682 | 0.999071534 | Trpc2         | Xntrpc        |         | 0.421080201 | 0.711480533 | 1.548365068 | 2.983430582 | 2.943115272 | 0.218286485 | 0           | 1.796143762 | 0.864255206 | 0.522871716 |
| ENSMUSG000000006299 | -0.314849408 | 7.271506834  | 1.789078472 | 0.181038482 | 0.999071534 | Aamp          | Aamp          | AAMP    | 190.9598713 | 150.3002626 | 184.9959655 | 176.8549896 | 185.1546519 | 188.0174254 | 125.2240929 | 128.2170316 | 86.89693254 | 149.8027466 |
| ENSMUSG000000078861 | 0.532490327  | 2.749600259  | 1.788152303 | 0.181151449 | 0.999071534 | Zfp931        | Zfp931        | ZNF788  | 5.684582717 | 6.106874574 | 4.645095204 | 5.897479057 | 5.624620297 | 4.438491853 | 11.38989165 | 6.493750525 | 4.242707375 | 10.91494707 |
| ENSMUSG000000061104 | -0.324729022 | 6.184008273  | 1.787702233 | 0.181206374 | 0.999071534 | Gm10094       | Gm10094       | SAP18   | 73.89957532 | 60.17939507 | 90.20909526 | 106.8484441 | 85.48114801 | 62.72098323 | 73.77543457 | 71.84575049 | 35.90587538 | 69.47657927 |
| ENSMUSG00000026589  | 0.47865622   | 2.927293436  | 1.78665891  | 0.181333772 | 0.999071534 | Sec16b        | Sec16b        | SEC16B  | 4.842422314 | 5.276813952 | 6.126140051 | 6.938210655 | 9.221761185 | 9.168032352 | 6.406814054 | 8.151729382 | 7.149747614 | 11.11102397 |
| ENSMUSG000000014361 | -0.721072446 | 3.066242223  | 1.786260056 | 0.181382503 | 0.999071534 | Mertk         | Mertk         | MERTK   | 17.33446828 | 17.54985314 | 6.933982695 | 5.61995063  | 6.213243352 | 14.77071879 | 9.901439902 | 2.901463001 | 0.864255206 | 4.182973728 |
| ENSMUSG000000044150 | 0.366011719  | 4.432887438  | 1.785802952 | 0.181438369 | 0.999071534 | A830080D01Rik | A830080D01Rik | CXorf23 | 13.61492651 | 17.84630337 | 25.91828483 | 14.01518552 | 26.29182976 | 20.00959442 | 23.23279036 | 25.9750021  | 20.8206936  | 25.2285603  |
| ENSMUSG000000035173 | -0.310639403 | 4.373988861  | 1.783512323 | 0.181718624 | 0.999071534 | A630007B06Rik | Ccdc186       | CCDC186 | 22.52779077 | 26.85839012 | 23.36011646 | 21.85536356 | 23.87193498 | 25.03018356 | 17.08483748 | 17.408778   | 14.6923385  | 15.62079252 |
| ENSMUSG000000030782 | 0.659985213  | 1.540919127  | 1.783499852 | 0.181720151 | 0.999071534 | Tgfb1i1       | Tgfb1i1       | TGFB1I1 | 3.579181711 | 2.193731643 | 2.423527932 | 0.693821065 | 2.419894779 | 3.929156722 | 2.9769035   | 2.417885834 | 3.142746204 | 3.986896835 |
| ENSMUSG000000000439 | -0.380620964 | 4.155736632  | 1.782535207 | 0.181838326 | 0.999071534 | Mkrn2         | Mkrn2         | MKRN2   | 22.87869093 | 26.08761954 | 19.11894258 | 15.81912029 | 20.40559922 | 24.15703763 | 16.8259763  | 16.37254122 | 6.442629718 | 13.20251083 |
| ENSMUSG00000020961  | -0.809690917 | 0.93389228   | 1.782453374 | 0.181848355 | 0.999071534 | Ston2         | Ston2         | STON2   | 4.140621979 | 2.54947191  | 2.221567271 | 1.734552664 | 1.111843547 | 3.34705943  | 0.906014109 | 1.312566595 | 0.549980586 | 0.522871716 |
| ENSMUSG00000019992  | 0.493594908  | 3.67952474   | 1.782356901 | 0.181860179 | 0.999071534 | Mtfr2         | Mtfr2         | MTFR2   | 15.22906728 | 6.759065062 | 11.84835878 | 8.950291745 | 12.0994739  | 14.69795663 | 24.46238094 | 12.78025369 | 13.59237733 | 5.620870947 |
| ENSMUSG00000029096  | -0.557212457 | 3.712458842  | 1.782279802 | 0.181869629 | 0.999071534 | Htra3         | Htra3         | HTRA3   | 17.89590855 | 14.94109119 | 17.43593707 | 13.25198235 | 16.87386089 | 20.59169171 | 12.8783434  | 11.4676871  | 1.257098482 | 7.908434705 |
| ENSMUSG000000086544 | 0.770081195  | 1.252916147  | 1.781802095 | 0.181928195 | 0.999071534 | Gm13704       | Chn1os3       |         | 1.473780704 | 0.830060622 | 2.221567271 | 2.22022741  | 1.896674286 | 1.45524323  | 1.164875283 | 2.279720929 | 4.478413341 | 3.660102012 |

|                     |              |              |             |             |             |               |               |               |             |             |             |              |             |             |             |             |             |             |
|---------------------|--------------|--------------|-------------|-------------|-------------|---------------|---------------|---------------|-------------|-------------|-------------|--------------|-------------|-------------|-------------|-------------|-------------|-------------|
| ENSMUSG00000036867  | -0.796877013 | 0.7665218    | 1.778737433 | 0.182304439 | 0.999071534 | Smad6         | Smad6         | SMAD6         | 2.526481208 | 2.845922132 | 0.942483085 | 1.665170557  | 2.354492217 | 1.45524323  | 0.647152935 | 1.4507315   | 0.31427462  | 1.764692042 |
| ENSMUSG000000025762 | 0.467025624  | 4.069871403  | 1.778519941 | 0.182331174 | 0.999071534 | Larp1b        | Larp1b        | LARP1B        | 12.00078574 | 10.85007813 | 22.68691426 | 14.70900659  | 12.0994739  | 17.53568093 | 9.772009315 | 16.64887103 | 28.36328449 | 17.38548456 |
| ENSMUSG000000019796 | 0.489153833  | 3.100837768  | 1.777196755 | 0.182493926 | 0.999071534 | Lrp11         | Lrp11         | LRP11         | 6.947823321 | 8.182026128 | 5.452937848 | 6.105625376  | 9.941189363 | 14.04309717 | 15.20809397 | 5.941090906 | 6.914041649 | 6.601255415 |
| ENSMUSG000000053453 | 0.350986318  | 6.562534276  | 1.776633479 | 0.18256326  | 0.999071534 | Thoc7         | Thoc7         | THOC7         | 83.93532012 | 70.55515284 | 100.1051676 | 84.36864156  | 91.43278111 | 73.27149665 | 162.5648172 | 94.15938261 | 92.86815033 | 79.47650084 |
| ENSMUSG000000034192 | 0.344707233  | 5.932317095  | 1.776370892 | 0.182595592 | 0.999071534 | Lsm3          | Lsm3          | LSM3          | 72.77669478 | 39.96148993 | 64.62741153 | 56.33827052  | 44.66994957 | 60.75640487 | 95.00205083 | 47.39056234 | 66.54756087 | 55.22832501 |
| ENSMUSG000000086127 | 1.060841371  | 0.266740602  | 1.776282227 | 0.182606511 | 0.999071534 | Gm11934       | Gm11934       |               | 0.701800335 | 0.355740266 | 1.413724627 | 0.485674746  | 0.719428178 | 0.145524323 | 1.035444696 | 0.759906976 | 3.064177549 | 1.503256184 |
| ENSMUSG000000090145 | -1.154674229 | 3.314204371  | 1.775654818 | 0.182683796 | 0.999071534 | Ugt1a6b       | Ugt1a6b       |               | 16.77302802 | 11.26510844 | 18.64770103 | 14.43147816  | 8.894748377 | 10.33222694 | 10.9368846  | 9.878790692 | 0           | 0           |
| ENSMUSG00000048677  | -0.368666653 | 4.066533655  | 1.775457886 | 0.182708062 | 0.999071534 | Tpcn2         | Tpcn2         | TPCN2         | 24.0717515  | 22.41163679 | 13.06012275 | 19.98204669  | 17.78949675 | 19.13644848 | 13.26663516 | 15.19813953 | 7.935434165 | 16.0129463  |
| ENSMUSG000000096948 | 0.967140228  | 0.476357844  | 1.775359718 | 0.18272016  | 0.999071534 | Gm4221        | Gm4221        |               | 0.701800335 | 1.422961066 | 0.403921322 | 0.901967385  | 1.046440986 | 0.291048646 | 0.711868228 | 2.210638477 | 3.064177549 | 1.241820326 |
| ENSMUSG000000004044 | -0.335284932 | 8.706087556  | 1.774272028 | 0.182854264 | 0.999071534 | Ptrf          | Ptrf          | PTRF          | 470.5571249 | 464.596788  | 517.2212529 | 438.5642955  | 529.6953464 | 565.4347572 | 321.7644392 | 312.2526848 | 264.5406617 | 360.3239713 |
| ENSMUSG000000022994 | -0.314032141 | 5.552662404  | 1.773850269 | 0.182906295 | 0.999071534 | Adcy6         | Adcy6         | ADCY6         | 57.47744747 | 71.68166369 | 49.27840129 | 45.23713347  | 46.23961105 | 57.84591841 | 32.81065379 | 51.05193232 | 21.68494881 | 43.07155761 |
| ENSMUSG000000011148 | -0.39408718  | 4.414864016  | 1.773095532 | 0.182999446 | 0.999071534 | Adssl1        | Adssl1        | ADSSL1        | 31.65119513 | 35.33686647 | 14.74312825 | 18.94131509  | 24.98377853 | 15.71662689 | 17.99085159 | 24.80060041 | 10.21392516 | 19.86912521 |
| ENSMUSG000000019823 | -0.468961668 | 3.284869788  | 1.77274794  | 0.183042365 | 0.999071534 | Mical1        | Mical1        | MICAL1        | 17.75554849 | 12.1544591  | 11.64639812 | 7.146356975  | 9.614176555 | 12.36956746 | 5.500799946 | 8.08264693  | 4.32127603  | 9.803844676 |
| ENSMUSG000000069862 | 0.921395702  | 0.579832436  | 1.772546164 | 0.183067285 | 0.999071534 | Rps12-ps9     | Rps12-ps9     |               | 2.245761073 | 0.237160178 | 0.336601102 | 0.624438959  | 1.504258917 | 1.45524323  | 2.006174098 | 1.105319238 | 1.021392516 | 3.071871332 |
| ENSMUSG000000021497 | -0.280154571 | 5.86399949   | 1.772351779 | 0.183091295 | 0.999071534 | Txndc15       | Txndc15       | TXNDC15       | 58.88104814 | 59.64578467 | 74.52348392 | 69.65963498  | 67.49544357 | 60.17430758 | 47.56574071 | 47.94322196 | 33.941659   | 66.66614379 |
| ENSMUSG000000040997 | -0.384614146 | 5.519021764  | 1.771987074 | 0.183136354 | 0.999071534 | Abhd4         | Abhd4         | ABHD4         | 42.38874026 | 69.36935196 | 49.21108107 | 38.43768703  | 70.76557165 | 41.9837672  | 30.28675735 | 68.80612258 | 20.03500705 | 32.15661054 |
| ENSMUSG000000084289 | -0.98959802  | 0.503559866  | 1.771499675 | 0.183196591 | 0.999071534 | Gm6977        | Gm6977        |               | 0.771980369 | 2.312311732 | 1.548365068 | 2.289609516  | 1.831271725 | 1.8918162   | 0.388291761 | 1.588896405 | 0           | 0.522871716 |
| ENSMUSG000000058240 | 0.309461185  | 5.097163995  | 1.768791758 | 0.183531679 | 0.999071534 | Cryz1l        | Cryz1l        | CRYZL1        | 29.54579412 | 33.08384478 | 30.15945871 | 33.30341114  | 31.72024237 | 28.37724299 | 37.08186316 | 38.34076108 | 37.71295445 | 36.66637909 |
| ENSMUSG000000034353 | -0.673838855 | 1.634424957  | 1.767994293 | 0.183630496 | 0.999071534 | Ramp1         | Ramp1         | RAMP1         | 3.719541778 | 6.106874574 | 4.039213221 | 2.081463196  | 3.073920395 | 1.091432423 | 2.523896446 | 2.348803381 | 2.907040239 | 1.699333077 |
| ENSMUSG000000028565 | 0.657739147  | 2.969364019  | 1.767946368 | 0.183636437 | 0.999071534 | Nfia          | Nfia          | NFIA          | 3.789721811 | 4.150303108 | 11.64639812 | 7.354503294  | 3.858751134 | 8.658697221 | 3.235764674 | 6.839162787 | 16.73512354 | 7.712357812 |
| ENSMUSG000000021631 | -1.894179611 | -0.071648478 | 1.767915924 | 0.183640295 | 0.999071534 | Mrps36-ps1    | Mrps36-ps1    |               | 0           | 2.845922132 | 0           | 2.844666369  | 0.784830739 | 0           | 0.647152935 | 0           | 0           | 0.980384468 |
| ENSMUSG000000038020 | -0.504808804 | 3.128266326  | 1.765884583 | 0.183892215 | 0.999071534 | Rapgef1l      | Rapgef1l      | RAPGEFL1      | 7.71980369  | 6.818355107 | 11.51157568 | 17.76181928  | 7.913709953 | 8.003837767 | 9.448432848 | 5.250266382 | 5.028393926 | 6.928050238 |
| ENSMUSG000000074527 | 0.71178456   | 1.130078499  | 1.76375654  | 0.184156648 | 0.999071534 | Gm14296       | Gm14296       | ZNF788        | 1.684320805 | 2.727342043 | 0.942483085 | 0.6232585279 | 1.962076848 | 2.619437815 | 2.459181152 | 1.312566595 | 2.278490998 | 3.660102012 |
| ENSMUSG000000039699 | -0.534117583 | 2.830280994  | 1.763476019 | 0.184191538 | 0.999071534 | Batf2         | Batf2         | BATF2         | 11.15862533 | 5.51397413  | 7.943786    | 8.533999106  | 9.744981678 | 7.276216152 | 2.265035272 | 5.250266382 | 4.399844685 | 8.56202435  |
| ENSMUSG000000023092 | -0.319441859 | 6.307824808  | 1.762850517 | 0.184269365 | 0.999071534 | Fhl1          | Fhl1          | FHL1          | 68.2149926  | 102.868227  | 111.2803242 | 83.11976365  | 90.12472988 | 114.1638314 | 64.39171701 | 74.60904859 | 50.0482333  | 45.22840344 |
| ENSMUSG000000042842 | -0.472647346 | 3.982173714  | 1.760415418 | 0.184572709 | 0.999071534 | Serpinb6b     | Serpinb6b     | SERPINB6      | 18.94860906 | 26.32477972 | 17.43593707 | 19.42698983  | 12.23027902 | 17.68120525 | 18.44385864 | 16.71795348 | 3.771295445 | 8.954178137 |
| ENSMUSG000000022892 | -0.364476471 | 8.278361942  | 1.75855292  | 0.184805114 | 0.999071534 | App           | App           | APP           | 263.0347657 | 427.0661899 | 358.1435722 | 378.2712449  | 383.9130366 | 355.8069698 | 207.7360921 | 344.0996954 | 182.8292604 | 237.7759129 |
| ENSMUSG000000029092 | 0.78078248   | 1.027026307  | 1.75846839  | 0.18481567  | 0.999071534 | 4930435H24Rik | D5Ert615e     |               | 1.122880537 | 1.363671021 | 2.558168373 | 1.387642131  | 0.850233301 | 0.9459081   | 1.48845175  | 1.934308667 | 3.299883514 | 3.464025119 |
| ENSMUSG000000079260 | 0.396314253  | 4.594943943  | 1.758017044 | 0.184872044 | 0.999071534 | Tmppe         | Tmppe         | TMPPE         | 18.24680872 | 17.72772328 | 26.45684659 | 21.1615425   | 24.00274011 | 25.03018356 | 16.43768454 | 19.06675686 | 36.45585597 | 30.78407228 |
| ENSMUSG000000098985 | 1.045806369  | -0.068995273 | 1.757765447 | 0.184903478 | 0.999071534 | RP24-570C10.6 | Gm27219       |               | 0.280720134 | 0.177870133 | 0.269280881 | 1.665170557  | 0.327012808 | 1.018670261 | 1.359021163 | 1.036236786 | 1.021392516 | 0.915025503 |
| ENSMUSG000000024965 | -0.375753148 | 4.925894755  | 1.757455389 | 0.184942225 | 0.999071534 | Fermt3        | Fermt3        | FERMT3        | 49.61728371 | 34.4475158  | 29.75553739 | 30.04245214  | 34.27094228 | 53.62571304 | 27.69814561 | 18.30684988 | 11.78529826 | 23.07171447 |
| ENSMUSG000000036880 | -0.34714492  | 4.893092294  | 1.756970096 | 0.185002888 | 0.999071534 | Acaa2         | Acaa2         | ACAA2         | 39.02009865 | 41.97735144 | 25.78364439 | 32.26267955  | 33.22450129 | 37.69079967 | 34.88154319 | 16.57978857 | 13.19953406 | 27.45076509 |
| ENSMUSG000000031896 | 1.072963265  | 0.529621138  | 1.756753212 | 0.185030007 | 0.999071534 | Ctrl          | Ctrl          | CTRL          | 1.052700503 | 0.889350666 | 1.009803305 | 0.20814632   | 1.373453794 | 0.436572969 | 0.19414588  | 1.243484143 | 4.478413341 | 1.503256184 |
| ENSMUSG000000032580 | 0.327617784  | 6.182567264  | 1.756372731 | 0.185077593 | 0.999071534 | Rbm5          | Rbm5          | RBM5          | 60.07410871 | 73.46036502 | 64.29081043 | 58.48911582  | 78.15606111 | 72.76216152 | 48.21289364 | 105.972482  | 64.42629718 | 94.70513957 |
| ENSMUSG000000049357 | 0.939618067  | 0.86353469   | 1.75516712  | 0.18522847  | 0.999071534 | 4933408B17Rik | 4933408B17Rik |               | 0.842160403 | 0.652190488 | 0.673202203 | 2.983430582  | 0.784830739 | 0.727621615 | 0.647152935 | 1.865226215 | 3.8498641   | 3.006512367 |
| ENSMUSG000000020381 | -0.662650521 | 1.530007531  | 1.753925924 | 0.185383949 | 0.999071534 | 3010026O09Rik | 3010026O09Rik | C5orf45       | 2.596661241 | 1.719411288 | 3.298690797 | 6.03624327   | 3.662543449 | 2.255627007 | 1.68259763  | 2.003391119 | 1.335667137 | 3.071871332 |
| ENSMUSG000000058914 | 1.414455714  | 0.907150059  | 1.753183016 | 0.185477083 | 0.999071534 | C1qtnf3       | C1qtnf3       | C1QTNF3-AMACR | 3.228281543 | 1.185800888 | 0.269280881 | 0.20814632   | 0.065402562 | 5.093351307 | 7.506974044 | 0.207247357 | 0           | 0.392153787 |
| ENSMUSG000000018470 | -0.872681388 | 0.253344209  | 1.75160272  | 0.185675375 | 0.999071534 | Kcnab3        | Kcnab3        | KCNAB3        | 1.263240604 | 1.185800888 | 0.875162864 | 2.150845303  | 1.569661478 | 1.45524323  | 0.711868228 | 0.552659619 | 0.707117896 | 0.261435858 |
| ENSMUSG000000020409 | 0.371343231  | 5.426960747  | 1.751055164 | 0.185744139 | 0.999071534 | Slu7          | Slu7          | SLU7          | 27.65093322 | 47.6691957  | 42.81566014 | 38.0907765   | 37.60647292 | 44.89425366 | 22.06791508 | 52.57174627 | 48.79113482 | 61.17599078 |

|                     |              |              |             |             |             |               |               |          |             |             |             |             |             |             |             |             |             |             |
|---------------------|--------------|--------------|-------------|-------------|-------------|---------------|---------------|----------|-------------|-------------|-------------|-------------|-------------|-------------|-------------|-------------|-------------|-------------|
| ENSMUSG00000028034  | 0.314547116  | 6.805564614  | 1.750592465 | 0.185802269 | 0.999071534 | Fubp1         | Fubp1         | FUBP1    | 93.83070485 | 80.99020066 | 131.2744297 | 100.7428187 | 109.6146932 | 153.9647338 | 112.022173  | 83.7279323  | 118.3243946 | 130.5872111 |
| ENSMUSG00000033170  | 0.306746589  | 5.340029859  | 1.749963111 | 0.18588137  | 0.999071534 | Card10        | Card10        | CARD10   | 36.77433758 | 32.3130742  | 33.39082929 | 33.858468   | 51.53721854 | 60.39259406 | 30.22204205 | 48.97945875 | 39.75573948 | 37.3853277  |
| ENSMUSG00000030527  | -0.366766465 | 4.316324589  | 1.749594307 | 0.185927742 | 0.999071534 | Crtc3         | Crtc3         | CRTC3    | 19.58022936 | 25.4947191  | 30.7653407  | 16.929234   | 23.21790937 | 25.97609166 | 10.67802342 | 14.78364481 | 12.09957289 | 21.76453518 |
| ENSMUSG00000074887  | 1.048992168  | 1.12127836   | 1.748538482 | 0.186060571 | 0.999071534 | EU599041      | EU599041      |          | 1.19306057  | 0.296450222 | 2.692808814 | 2.289609516 | 0.457817931 | 0.509335131 | 0.711868228 | 1.243484143 | 7.071178959 | 2.483640651 |
| ENSMUSG00000090639  | -2.445915843 | 1.614136339  | 1.747991063 | 0.186129483 | 0.999071534 | Gm20425       | Gm20425       | TF       | 11.86042567 | 14.05174052 | 0           | 0           | 0           | 5.311637791 | 0           | 0           | 0           | 0           |
| ENSMUSG00000039262  | -0.339508006 | 6.189891191  | 1.747890125 | 0.186142193 | 0.999071534 | Prrc2b        | Prrc2b        | PRRC2B   | 79.16307784 | 103.6389976 | 76.61041075 | 69.72901708 | 94.76831175 | 118.9661341 | 41.87079488 | 64.8684228  | 33.15597245 | 65.5550414  |
| ENSMUSG00000020044  | -0.38938222  | 7.272831287  | 1.747854905 | 0.186146628 | 0.999071534 | Timp3         | Timp3         | TIMP3    | 117.8322763 | 234.7885759 | 149.1816083 | 178.5201602 | 229.7591989 | 110.380199  | 99.85569784 | 196.4014122 | 119.8957677 | 107.6462145 |
| ENSMUSG00000035367  | 0.338866805  | 4.60722167   | 1.746741439 | 0.186286904 | 0.999071534 | Rmi1          | Rmi1          | RMI1     | 22.03653053 | 15.17825137 | 19.65750434 | 28.5854279  | 25.17998621 | 26.41266463 | 24.7859574  | 25.00784777 | 24.90626367 | 28.43114956 |
| ENSMUSG00000036285  | 0.313293745  | 5.096490649  | 1.746563564 | 0.186309324 | 0.999071534 | Noa1          | Noa1          | NOA1     | 35.93217717 | 23.53814763 | 37.02612119 | 31.63824059 | 29.49655528 | 43.65729691 | 45.94785837 | 24.3861057  | 33.70595304 | 34.96704601 |
| ENSMUSG00000025498  | -0.387645705 | 4.631226992  | 1.745729533 | 0.186414492 | 0.999071534 | Irf7          | Irf7          | IRF7     | 29.54579412 | 37.94562842 | 29.28429585 | 26.78149313 | 21.4520402  | 40.52852397 | 10.48387754 | 22.31363212 | 15.55659371 | 17.77763835 |
| ENSMUSG00000041958  | -0.29244271  | 5.633513328  | 1.745636334 | 0.186426248 | 0.999071534 | Pigs          | Pigs          | PIGS     | 72.35561458 | 57.86708334 | 43.62350278 | 54.53433575 | 55.06895686 | 64.03070214 | 52.16052654 | 32.26150527 | 28.91326508 | 42.74476279 |
| ENSMUSG00000058886  | 0.389116559  | 4.309713048  | 1.745117923 | 0.186491656 | 0.999071534 | Deaf1         | Deaf1         | DEAF1    | 17.33446828 | 15.11896132 | 19.32090324 | 17.13738032 | 19.62076848 | 20.73721603 | 11.06631518 | 19.75758138 | 25.53481291 | 28.3657906  |
| ENSMUSG00000067575  | 0.387681404  | 7.394895499  | 1.7448668   | 0.186523351 | 0.999071534 | Rpl35a-ps3    | Rpl35a-ps3    |          | 159.3086761 | 140.9324356 | 144.6038333 | 171.9982421 | 137.3453794 | 95.10014511 | 213.0427461 | 221.8237546 | 181.9650052 | 179.8678703 |
| ENSMUSG00000002992  | -0.538910269 | 3.014413257  | 1.74481338  | 0.186530094 | 0.999071534 | Apoc2         | Apoc2         | APOC2    | 14.59744698 | 9.367827016 | 5.99149961  | 5.064893778 | 14.38856355 | 5.457162114 | 7.571689337 | 9.80970824  | 3.535589479 | 4.901922338 |
| ENSMUSG00000076441  | -0.541950052 | 5.036569739  | 1.74440437  | 0.18658173  | 0.999071534 | Ass1          | Ass1          | ASS1     | 57.96870771 | 71.74095373 | 22.08103227 | 22.75733095 | 28.31930917 | 54.57162114 | 43.48867722 | 16.71795348 | 8.956826681 | 13.20251083 |
| ENSMUSG00000034203  | 0.468211832  | 4.511221092  | 1.743965562 | 0.186637147 | 0.999071534 | Chchd4        | Chchd4        | CHCHD4   | 29.05453389 | 15.59328168 | 13.12744297 | 19.70451826 | 21.51744277 | 37.83632399 | 50.6073595  | 12.08942917 | 14.6923385  | 15.94758734 |
| ENSMUSG00000042642  | -0.333982157 | 4.545838186  | 1.742467414 | 0.186826492 | 0.999071534 | Flad1         | Flad1         | FLAD1    | 33.8969562  | 23.53814763 | 20.46534698 | 25.94890785 | 30.87000907 | 22.62903223 | 15.8552469  | 17.89235517 | 16.57798623 | 26.40502166 |
| ENSMUSG000000095526 | 0.387589212  | 7.394722429  | 1.741591103 | 0.18693735  | 0.999071534 | Gm10243       | Gm10243       |          | 159.3086761 | 140.9324356 | 144.6038333 | 171.9982421 | 137.2799768 | 95.10014511 | 213.0427461 | 221.7546722 | 181.9650052 | 179.8025114 |
| ENSMUSG00000045996  | 0.35947242   | 6.175202506  | 1.741282136 | 0.186976454 | 0.999071534 | Polr2k        | Polr2k        | POLR2K   | 66.67103186 | 43.45960255 | 85.63132027 | 77.77734144 | 52.71446465 | 55.95410221 | 90.2778344  | 63.00319658 | 84.46130423 | 87.84244829 |
| ENSMUSG000000081214 | 0.387489203  | 7.394665826  | 1.741002588 | 0.187011842 | 0.999071534 | Rpl35a-ps2    | Rpl35a-ps2    |          | 159.3086761 | 140.9324356 | 144.6038333 | 171.9982421 | 137.2799768 | 95.10014511 | 212.9780308 | 221.7546722 | 181.9650052 | 179.8025114 |
| ENSMUSG00000094664  | 0.387489227  | 7.394665826  | 1.740705007 | 0.187049523 | 0.999071534 | Rpl35a-ps6    | Rpl35a-ps6    |          | 159.3086761 | 140.9324356 | 144.6038333 | 171.9982421 | 137.2799768 | 95.10014511 | 212.9780308 | 221.7546722 | 181.9650052 | 179.8025114 |
| ENSMUSG000000083424 | 0.387489235  | 7.394665826  | 1.740604959 | 0.187062193 | 0.999071534 | Rpl35a-ps4    | Rpl35a-ps4    |          | 159.3086761 | 140.9324356 | 144.6038333 | 171.9982421 | 137.2799768 | 95.10014511 | 212.9780308 | 221.7546722 | 181.9650052 | 179.8025114 |
| ENSMUSG000000334485 | -0.31344     | 5.485001943  | 1.740477977 | 0.187078275 | 0.999071534 | Uaca          | Uaca          | UACA     | 42.31856023 | 67.17562031 | 45.77774983 | 50.37140935 | 51.21020573 | 65.48594537 | 31.06334087 | 38.8934207  | 21.99922343 | 41.50294246 |
| ENSMUSG000000022111 | 0.329581847  | 6.392254883  | 1.739524943 | 0.187199031 | 0.999071534 | Uchl3         | Uchl3         | UCHL3    | 77.47875703 | 49.09215677 | 92.8348385  | 90.95994169 | 73.77408948 | 86.36868573 | 121.0823141 | 67.42447354 | 83.59704902 | 88.95355069 |
| ENSMUSG00000019853  | 0.351859149  | 4.939758811  | 1.739319568 | 0.187225065 | 0.999071534 | Hebp2         | Hebp2         | HEBP2    | 20.77328993 | 32.37236425 | 23.4947569  | 26.71211102 | 36.16761656 | 22.55627007 | 43.42396192 | 41.31130653 | 25.61338156 | 30.26120057 |
| ENSMUSG000000007039 | 0.400961185  | 3.932335932  | 1.739031928 | 0.187261535 | 0.999071534 | Ddah2         | Ddah2         | DDAH2    | 16.63266795 | 8.537766395 | 18.78234148 | 10.47669809 | 13.47292769 | 21.46483765 | 17.02012219 | 10.36236786 | 14.61376985 | 20.32663796 |
| ENSMUSG000000070469 | -0.401088086 | 4.186879669  | 1.738947382 | 0.187272256 | 0.999071534 | Adamtsl3      | Adamtsl3      | ADAMTSL3 | 18.73806896 | 28.16277109 | 15.34901024 | 17.90058349 | 27.0766605  | 23.35665385 | 22.39149154 | 13.33291331 | 6.835472994 | 12.02604947 |
| ENSMUSG00000038712  | -0.266109487 | 5.639163502  | 1.738443409 | 0.187336178 | 0.999071534 | Fam63a        | Fam63a        | FAM63A   | 63.30239025 | 61.95809641 | 43.690823   | 52.31410834 | 61.08599253 | 55.66305356 | 43.61810781 | 43.31469765 | 31.34889338 | 46.60094169 |
| ENSMUSG00000037965  | 0.363024893  | 6.865596422  | 1.738410353 | 0.187340372 | 0.999071534 | Zc3h7a        | Zc3h7a        | ZC3H7A   | 104.0769897 | 84.54760332 | 118.2143069 | 106.7096799 | 114.9777033 | 100.1207343 | 72.67527458 | 154.8828583 | 137.1808718 | 151.044567  |
| ENSMUSG00000028312  | 0.376267905  | 6.080252762  | 1.737855836 | 0.187410736 | 0.999071534 | Smc2          | Smc2          | SMC2     | 72.14507448 | 45.59404415 | 61.79996227 | 55.78321367 | 70.37315628 | 126.8972097 | 107.1038107 | 32.67599998 | 57.0408436  | 55.94727362 |
| ENSMUSG00000079415  | -1.573498996 | -0.192196357 | 1.737217664 | 0.187491754 | 0.999071534 | Cntf          | Cntf          | CNTF     | 1.684320805 | 1.48225111  | 1.279084186 | 0           | 1.308051232 | 1.018670261 | 0.906014109 | 0           | 0           | 0           |
| ENSMUSG000000022811 | 0.287505028  | 5.160578392  | 1.73717883  | 0.187496685 | 0.999071534 | Zfp148        | Zfp148        | ZNF148   | 30.10723439 | 37.1155678  | 32.98690797 | 29.27924896 | 37.34486267 | 42.85691314 | 40.51177372 | 32.74508243 | 39.28432755 | 32.28732847 |
| ENSMUSG00000028542  | -0.509302303 | 2.973761975  | 1.736195027 | 0.187621665 | 0.999071534 | Slc6a9        | Slc6a9        | SLC6A9   | 7.088183388 | 7.648415729 | 10.29999371 | 14.22333184 | 7.325086899 | 10.55051342 | 3.365195261 | 6.424668073 | 5.499805857 | 5.490153018 |
| ENSMUSG000000022667 | 0.967775113  | 1.200296301  | 1.736077631 | 0.187636585 | 0.999071534 | Cd200r1       | Cd200r1       | CD200R1L | 2.877381375 | 1.956571465 | 1.750325729 | 0           | 1.111843547 | 5.093351307 | 5.75966112  | 1.105319238 | 1.414235792 | 1.111102397 |
| ENSMUSG000000097726 | 1.254273673  | 0.300028993  | 1.735518319 | 0.187707689 | 0.999071534 | 9530036O11Rik | 9530036O11Rik |          | 1.614140771 | 0.177870133 | 0.942483085 | 0.624438959 | 0.130805123 | 0.436572969 | 0.064715293 | 0.759906976 | 4.399844685 | 1.176461361 |
| ENSMUSG00000004846  | -0.310404664 | 7.22081836   | 1.735252697 | 0.187741467 | 0.999071534 | Plod3         | Plod3         | PLOD3    | 170.5374815 | 201.4675709 | 162.847613  | 155.1383902 | 167.6267654 | 160.4405662 | 142.6972221 | 144.1059957 | 78.17581182 | 127.3846218 |
| ENSMUSG000000089706 | 1.188105866  | -0.236693358 | 1.733537763 | 0.187959722 | 0.999071534 | B230216N24Rik | B230216N24Rik |          | 0.140360067 | 0.948640711 | 0.673202203 | 0           | 0.523220493 | 0.218286485 | 0.776583522 | 0.759906976 | 1.021392516 | 1.895409971 |
| ENSMUSG000000060149 | 0.453018748  | 3.38341832   | 1.733390868 | 0.187978431 | 0.999071534 | BC002059      | BC002059      |          | 5.75476275  | 7.351965506 | 13.32940363 | 8.395234892 | 10.26820217 | 11.49642152 | 16.8906916  | 12.08942917 | 7.149747614 | 10.26135743 |
| ENSMUSG000000024287 | 0.300986461  | 6.25820301   | 1.73299706  | 0.188028597 | 0.999071534 | Thoc1         | Thoc1         | THOC1    | 72.98723488 | 58.81572405 | 74.72544458 | 83.81358471 | 63.63669243 | 80.62047497 | 89.04824383 | 60.72347565 | 82.26138189 | 90.06465309 |

|                    |              |              |             |             |             |               |               |           |             |             |             |             |             |             |             |             |             |             |
|--------------------|--------------|--------------|-------------|-------------|-------------|---------------|---------------|-----------|-------------|-------------|-------------|-------------|-------------|-------------|-------------|-------------|-------------|-------------|
| ENSMUSG00000031574 | 1.170023402  | -0.350839069 | 1.732482394 | 0.188094183 | 0.999071534 | Star          | Star          | STAR      | 0           | 0.355740266 | 0.06732022  | 0.832585279 | 0.784830739 | 1.382481069 | 1.164875283 | 0.898071881 | 0.471411931 | 0.588230681 |
| ENSMUSG00000055817 | -0.360496498 | 4.558881609  | 1.732178466 | 0.188132926 | 0.999071534 | Mta3          | Mta3          | MTA3      | 25.82625234 | 34.03248549 | 26.72612748 | 20.05142879 | 30.73920395 | 28.37724299 | 12.55476693 | 21.69189005 | 11.39245499 | 27.38540613 |
| ENSMUSG00000033955 | -0.341818448 | 5.412402465  | 1.731768536 | 0.188185197 | 0.999071534 | Tnks1bp1      | Tnks1bp1      | TNKS1BP1  | 46.73990234 | 59.64578467 | 47.39343512 | 36.14807751 | 57.61965677 | 63.73965349 | 29.12188207 | 42.96928539 | 16.1065743  | 36.47030219 |
| ENSMUSG00000003545 | -0.62125196  | 2.316141585  | 1.73113918  | 0.188265479 | 0.999071534 | Fosb          | Fosb          | FOSB      | 8.351423991 | 6.04758453  | 4.645095204 | 4.717983245 | 6.867268968 | 1.8918162   | 1.617882337 | 7.115492597 | 3.142746204 | 4.117614764 |
| ENSMUSG00000029108 | 0.277331246  | 5.980856603  | 1.730280813 | 0.188375039 | 0.999071534 | Pcdh7         | Pcdh7         | PCDH7     | 46.59954227 | 71.50379355 | 51.76924944 | 60.15428638 | 65.59876928 | 79.31075606 | 71.38096871 | 60.99980546 | 59.55504056 | 62.54852903 |
| ENSMUSG00000094870 | 0.291756717  | 5.301347291  | 1.728797016 | 0.188564603 | 0.999071534 | Zfp131        | Zfp131        | ZNF131    | 35.09001677 | 33.32100496 | 38.17056493 | 37.0500449  | 39.63395233 | 45.03977798 | 37.27600904 | 37.02819448 | 48.16258558 | 38.03891734 |
| ENSMUSG00000020077 | -0.405929509 | 7.479844705  | 1.727208918 | 0.188767737 | 0.999071534 | Srgn          | Srgn          | SRGN      | 305.423506  | 248.2474159 | 142.6515469 | 187.4010698 | 174.8864497 | 98.30168022 | 159.3290525 | 218.7841267 | 90.82536529 | 167.2535902 |
| ENSMUSG00000073982 | -0.281046702 | 6.073203308  | 1.727206832 | 0.188768004 | 0.999071534 | Rhog          | Rhog          | RHOG      | 62.46022985 | 68.59858138 | 85.42935961 | 78.60992672 | 87.11621205 | 78.07379931 | 55.20214534 | 65.49016487 | 38.498641   | 60.45704217 |
| ENSMUSG00000051329 | 0.326323602  | 4.593366364  | 1.726661075 | 0.188837871 | 0.999071534 | Nup160        | Nup160        | NUP160    | 19.01878909 | 21.46299608 | 28.27449254 | 17.41490874 | 24.65676572 | 41.0378591  | 25.88611739 | 23.62619872 | 20.66355629 | 20.39199693 |
| ENSMUSG00000020439 | -0.438609706 | 6.221295438  | 1.725912994 | 0.188933689 | 0.999071534 | Smtn          | Smtn          | SMTN      | 54.24916593 | 153.6797951 | 78.69733758 | 60.3624327  | 100.0659192 | 80.40218848 | 30.7397644  | 105.8343171 | 33.62738438 | 59.67273459 |
| ENSMUSG00000090150 | -0.450733401 | 3.303236436  | 1.723378692 | 0.189258713 | 0.999071534 | Acad11        | Acad11        | ACAD11    | 7.509263589 | 15.77115181 | 12.5888812  | 10.82360862 | 11.64165596 | 13.67928637 | 5.75966112  | 8.428059192 | 4.399844685 | 8.823460208 |
| ENSMUSG00000026715 | 0.870290514  | 0.580191532  | 1.721611609 | 0.189485728 | 0.999071534 | Serpinc1      | Serpinc1      | SERPINC1  | 0.771980369 | 0.770770577 | 1.346404407 | 0.971349492 | 1.177246109 | 0.363810808 | 1.035444696 | 1.4507315   | 2.671334273 | 2.548999616 |
| ENSMUSG00000062582 | -1.398032216 | -0.179048282 | 1.720631159 | 0.189611821 | 0.999071534 | Rpl30-ps8     | Rpl30-ps8     |           | 0.98252047  | 2.54947191  | 0.605881983 | 0.763203172 | 0.654025616 | 1.164194584 | 0.970729402 | 0           | 0           | 0           |
| ENSMUSG00000031432 | 0.411338438  | 6.21281879   | 1.719328855 | 0.189779459 | 0.999071534 | Prps1         | Prps1         |           | 101.8312287 | 74.58687586 | 53.65421561 | 45.79219032 | 56.11539785 | 108.4883828 | 154.5401208 | 42.69295558 | 54.7623526  | 56.40478637 |
| ENSMUSG00000055692 | 0.696758542  | 1.936493938  | 1.718878339 | 0.189837491 | 0.999071534 | Tmem191c      | Tmem191c      | TMEM191C  | 2.38612114  | 2.96450222  | 3.837252559 | 2.289609516 | 3.204725518 | 1.600767553 | 1.48845175  | 6.148338263 | 4.399844685 | 7.646998847 |
| ENSMUSG00000053390 | 0.524237091  | 2.415484061  | 1.717977857 | 0.189953547 | 0.999071534 | Zfp952        | Zfp952        |           | 4.35116208  | 4.921073686 | 5.385617627 | 4.440454819 | 3.008517833 | 5.166113468 | 6.277383467 | 5.112101477 | 7.542590889 | 4.771204409 |
| ENSMUSG00000050619 | -0.405091383 | 3.504547228  | 1.716613136 | 0.190129593 | 0.999071534 | Zscan29       | Zscan29       | ZSCAN29   | 12.49204597 | 12.62877946 | 10.9058757  | 11.58681179 | 18.96674286 | 13.46099988 | 9.254286968 | 8.35897674  | 5.578374512 | 11.045665   |
| ENSMUSG00000027130 | -0.354533506 | 5.087929314  | 1.715989654 | 0.190210084 | 0.999071534 | Slc12a6       | Slc12a6       | SLC12A6   | 41.75711996 | 52.82742957 | 25.71632417 | 33.02588272 | 44.86615725 | 38.49118345 | 30.61033382 | 37.85718391 | 11.94243557 | 28.56186749 |
| ENSMUSG00000061111 | -0.492395372 | 5.905435785  | 1.715590605 | 0.190261622 | 0.999071534 | Fam195b       | Fam195b       | MCRIP1    | 126.3240604 | 76.66202742 | 47.46075534 | 55.57506735 | 59.05851312 | 82.0757182  | 96.42578728 | 27.14940379 | 14.61376985 | 32.61412329 |
| ENSMUSG00000022867 | -0.322078233 | 5.100536381  | 1.714892206 | 0.19035186  | 0.999071534 | Usp25         | Usp25         | USP25     | 40.49387935 | 56.38483223 | 31.30390246 | 28.72419211 | 41.20361381 | 47.73197796 | 26.59798562 | 32.95232979 | 19.56359512 | 23.72530412 |
| ENSMUSG00000013833 | -0.354907552 | 4.376104278  | 1.714733422 | 0.190372383 | 0.999071534 | Med16         | Med16         | MED16     | 21.82599043 | 26.97697021 | 18.78234148 | 25.4632331  | 27.14206306 | 31.06944297 | 19.99702569 | 13.81649048 | 8.878258026 | 17.32012559 |
| ENSMUSG00000034216 | -0.302529198 | 4.484946927  | 1.71307034  | 0.190587494 | 0.999071534 | Vps18         | Vps18         | VPS18     | 26.17715251 | 25.25755892 | 24.10063888 | 26.22643628 | 25.76860927 | 22.77455656 | 16.50239984 | 20.86290062 | 14.45663254 | 22.22204793 |
| ENSMUSG00000049521 | -0.302098198 | 5.851622627  | 1.712855273 | 0.190615332 | 0.999071534 | Cdc42ep1      | Cdc42ep1      | CDC42EP1  | 58.81086811 | 62.55099865 | 58.50127148 | 66.67620439 | 83.91148653 | 88.33326409 | 38.37616903 | 51.67367439 | 30.0917949  | 49.54209509 |
| ENSMUSG00000051319 | 0.382531728  | 4.575608169  | 1.711508865 | 0.19078972  | 0.999071534 | 1500011K16Rik | 1500011K16Rik | LINC00116 | 26.52805268 | 13.93316044 | 25.58168373 | 23.03485937 | 17.52788651 | 18.3360647  | 31.38691734 | 19.82666384 | 28.04900987 | 28.75794438 |
| ENSMUSG00000035027 | -0.31868304  | 7.303815358  | 1.711381399 | 0.190806239 | 0.999071534 | Map2k2        | Map2k2        | MAP2K2    | 214.1192823 | 152.7904444 | 200.8835375 | 153.9588944 | 190.059844  | 213.6297062 | 124.3180788 | 115.9203551 | 93.9681115  | 147.9073367 |
| ENSMUSG00000002031 | -0.271923316 | 5.430094833  | 1.710587034 | 0.190909224 | 0.999071534 | Ift46         | Ift46         | IFT46     | 46.38900217 | 47.07629526 | 56.54898509 | 45.65342611 | 48.33249302 | 43.8755834  | 36.88771728 | 42.20937841 | 33.0774038  | 31.82981571 |
| ENSMUSG00000021431 | 0.363003853  | 5.07196578   | 1.709732038 | 0.191020141 | 0.999071534 | Snmp48        | Snmp48        | SNRNP48   | 24.56301174 | 30.53437287 | 33.25618885 | 29.14048475 | 34.59795508 | 22.99284304 | 24.72124211 | 41.10405917 | 41.56281855 | 45.42448033 |
| ENSMUSG00000035047 | 0.373251522  | 4.444000363  | 1.708538254 | 0.191175134 | 0.999071534 | Kri1          | Kri1          | KRI1      | 15.22906728 | 15.53399163 | 24.97580175 | 20.05142879 | 21.84445557 | 26.63095112 | 13.00777399 | 26.59674417 | 26.32049946 | 23.65994515 |
| ENSMUSG00000022788 | 0.427126575  | 4.359459332  | 1.707151451 | 0.191355373 | 0.999071534 | Fgd4          | Fgd4          | FGD4      | 17.19410822 | 12.27303919 | 19.05162236 | 22.75733095 | 18.57432749 | 18.84539983 | 13.00777399 | 17.06336574 | 33.23454111 | 26.27430373 |
| ENSMUSG00000025971 | 0.339278656  | 4.627151429  | 1.705752854 | 0.191537344 | 0.999071534 | 9430016H08Rik | 9430016H08Rik | C2orf47   | 28.07201342 | 17.72772328 | 17.97449883 | 26.85087523 | 21.77905301 | 24.59361059 | 35.78755729 | 21.13923043 | 21.76351746 | 28.75794438 |
| ENSMUSG00000063334 | 0.287085306  | 5.976832805  | 1.704397433 | 0.191713891 | 0.999071534 | Krr1          | Krr1          | KRR1      | 72.42579462 | 52.11594903 | 50.35552482 | 61.4725464  | 57.42344908 | 73.19873449 | 67.75691227 | 49.0485412  | 66.3119449  | 75.09745022 |
| ENSMUSG00000027215 | -0.272274989 | 6.077541311  | 1.704169368 | 0.191743616 | 0.999071534 | Cd82          | Cd82          | CD82      | 71.79417431 | 85.97056439 | 76.47577031 | 67.99446442 | 81.03377382 | 58.50077786 | 67.23918993 | 55.19687946 | 55.78374512 | 55.4244019  |
| ENSMUSG00000026023 | 0.893447763  | 2.144999268  | 1.702758489 | 0.191927622 | 0.999071534 | Cdk15         | Cdk15         | CDK15     | 2.315941107 | 1.067220799 | 3.971893    | 6.03624327  | 2.027479409 | 1.236956746 | 0.841298815 | 3.108710358 | 11.78529826 | 7.581639883 |
| ENSMUSG00000096010 | 0.930522556  | 2.340043283  | 1.701281528 | 0.192120466 | 0.999071534 | Hist4h4       | Hist4h4       | HIST1H4J  | 2.456301174 | 1.422961066 | 8.549667983 | 4.232308499 | 0.850233301 | 2.328389169 | 0.841298815 | 2.417885834 | 12.88525944 | 10.32671639 |
| ENSMUSG00000028703 | -0.278258612 | 5.656439705  | 1.701001171 | 0.192157098 | 0.999071534 | Lrrc41        | Lrrc41        | LRRC41    | 65.75869143 | 55.02116121 | 62.33852404 | 45.72280822 | 58.33908494 | 65.34042105 | 48.98947716 | 42.20937841 | 24.90626367 | 44.18266001 |
| ENSMUSG00000016918 | 0.859288508  | 2.481769925  | 1.700907047 | 0.192169398 | 0.999071534 | Sulf1         | Sulf1         | SULF1     | 8.421604025 | 3.438822576 | 1.548365068 | 2.497755836 | 4.381971627 | 13.09718907 | 17.861421   | 1.036236786 | 1.021392516 | 3.33330719  |
| ENSMUSG00000032468 | 0.290359209  | 4.633892364  | 1.699647017 | 0.192334146 | 0.999071534 | Armc8         | Armc8         | ARMC8     | 24.00157147 | 24.13104807 | 25.24508263 | 19.35760773 | 22.825494   | 33.25230782 | 28.02172208 | 22.31363212 | 20.89926226 | 27.90827784 |
| ENSMUSG00000069633 | -0.638586687 | 1.987867034  | 1.699270276 | 0.192383437 | 0.999071534 | Pex11g        | Pex11g        | PEX11G    | 8.561964092 | 6.759065062 | 3.500651458 | 2.150845303 | 3.466335765 | 5.529924276 | 3.235764674 | 2.417885834 | 1.099961171 | 2.875794438 |
| ENSMUSG00000086680 | 1.418230593  | -0.487955325 | 1.698692975 | 0.192458996 | 0.999071534 | Gm11592       | Gm11592       |           | 0.350900168 | 0.474320355 | 0.471241542 | 0           | 0.39241537  | 0           | 0.064715293 | 1.312566595 | 1.335667137 | 1.176461361 |

|                    |              |              |             |             |             |               |               |         |             |             |             |             |             |             |             |             |             |             |
|--------------------|--------------|--------------|-------------|-------------|-------------|---------------|---------------|---------|-------------|-------------|-------------|-------------|-------------|-------------|-------------|-------------|-------------|-------------|
| ENSMUSG00000021306 | 0.369503845  | 6.357500756  | 1.697838943 | 0.192570839 | 0.999071534 | Gpr137b       | Gpr137b       | GPR137B | 77.33839696 | 99.6072746  | 65.63721483 | 43.84949134 | 87.18161461 | 70.14272371 | 70.4749546  | 148.9417674 | 70.31894631 | 79.21506498 |
| ENSMUSG00000071076 | -0.347610562 | 7.549612563  | 1.697122633 | 0.192664704 | 0.999071534 | Jund          | Jund          | JUND    | 226.3306082 | 180.5974753 | 261.1351347 | 218.6923998 | 200.0010334 | 188.3812362 | 111.3750201 | 217.6788075 | 106.7748023 | 177.7763835 |
| ENSMUSG00000086697 | 1.806496     | -0.466085544 | 1.696601094 | 0.19273308  | 0.999071534 | 4933427G23Rik | 4933427G23Rik |         | 0           | 0           | 1.211763966 | 0           | 0.130805123 | 0.072762162 | 0.647152935 | 2.141556024 | 0           | 1.568615148 |
| ENSMUSG00000092641 | 1.373017507  | 0.107600216  | 1.694795914 | 0.192969967 | 0.999071534 | Gm23563       | Gm23563       |         | 0.280720134 | 0           | 0.269280881 | 1.80393477  | 0.39241537  | 0.145524323 | 0.19414588  | 1.4507315   | 3.614158135 | 0.653589645 |
| ENSMUSG00000052296 | -0.367258688 | 5.69607817   | 1.694746462 | 0.192976461 | 0.999071534 | Ppp6r1        | Ppp6r1        | PPP6R1  | 76.56641659 | 81.28665088 | 45.97971049 | 42.73937763 | 57.61965677 | 99.02930183 | 35.26983495 | 34.05764903 | 26.00622484 | 36.01278944 |
| ENSMUSG00000055436 | 0.421357041  | 7.942642405  | 1.693482551 | 0.193142528 | 0.999071534 | Srsf11        | Srsf11        | SRSF11  | 185.5560087 | 147.7507907 | 308.4612496 | 238.2581539 | 206.8028998 | 196.4578361 | 163.2119702 | 320.9570738 | 317.7316412 | 315.6837986 |
| ENSMUSG00000043964 | -0.433849665 | 4.084500175  | 1.693459709 | 0.193145531 | 0.999071534 | Orai3         | Orai3         | ORAI3   | 28.21237348 | 20.39577528 | 12.79084186 | 20.39833933 | 18.77053518 | 21.173789   | 23.36222095 | 11.53676955 | 5.578374512 | 10.1306395  |
| ENSMUSG00000028958 | -0.470710673 | 2.784025498  | 1.693455871 | 0.193146035 | 0.999071534 | Tmub1         | Tmub1         | TMUB1   | 8.632144126 | 8.834216617 | 5.92417939  | 9.158438064 | 8.109917638 | 5.093351307 | 6.277383467 | 4.90485412  | 3.535589479 | 7.581639883 |
| ENSMUSG00000048776 | 0.414445826  | 5.499375186  | 1.693120282 | 0.193190158 | 0.999071534 | Pthlh         | Pthlh         | PTHLH   | 36.00235721 | 38.89426913 | 49.68232261 | 27.82222473 | 49.18272632 | 24.73913492 | 35.01097377 | 83.31343759 | 52.87670488 | 43.13691657 |
| ENSMUSG00000037640 | 0.386895623  | 3.814128479  | 1.692741931 | 0.193239916 | 0.999071534 | Zfp60         | Zfp60         | ZNF780B | 10.6673651  | 13.69600026 | 10.97319592 | 14.15394974 | 13.01510976 | 18.48158903 | 11.97232929 | 12.15851162 | 18.85647722 | 13.72538255 |
| ENSMUSG00000085893 | -0.95880064  | 0.145273802  | 1.692563921 | 0.193263332 | 0.999071534 | Gm12091       | Gm12091       |         | 1.965040939 | 1.897281421 | 2.086926831 | 0.277528426 | 0.457817931 | 0.436572969 | 0.582437641 | 0.967154334 | 0.471411931 | 0.653589645 |
| ENSMUSG00000031365 | 0.27967752   | 5.239669945  | 1.689648886 | 0.19364726  | 0.999071534 | Zfp275        | Zfp275        | ZNF275  | 32.8442557  | 34.32893571 | 36.01631788 | 31.22194795 | 42.44626248 | 56.09962653 | 36.36999494 | 34.40306129 | 38.89148427 | 34.64025119 |
| ENSMUSG00000051295 | 1.406269793  | -0.023614039 | 1.68953753  | 0.193661944 | 0.999071534 | 9630028B13Rik | 9630028B13Rik |         | 0.350900168 | 0.237160178 | 1.211763966 | 0.693821065 | 0           | 0.145524323 | 0.064715293 | 0.552659619 | 3.771295445 | 0.915025503 |
| ENSMUSG00000027429 | 0.282202464  | 5.502692949  | 1.689263215 | 0.193698122 | 0.999071534 | Sec23b        | Sec23b        | SEC23B  | 39.58153892 | 45.5347541  | 47.46075534 | 40.03347548 | 39.04532927 | 65.34042105 | 40.51177372 | 36.1301226  | 48.6399751  | 49.47673613 |
| ENSMUSG00000022793 | 0.634860591  | 1.406477593  | 1.688473061 | 0.193802376 | 0.999071534 | B4galT4       | B4galT4       | B4GALT4 | 1.965040939 | 1.660121243 | 1.413724627 | 2.150845303 | 3.073920395 | 4.511254014 | 3.041618794 | 1.4507315   | 3.142746204 | 2.810435474 |
| ENSMUSG00000059555 | -0.553934416 | 4.854104505  | 1.687794485 | 0.19389196  | 0.999071534 | Tor4a         | Tor4a         | TOR4A   | 53.68772566 | 49.62576717 | 19.45554368 | 22.89609516 | 33.5515141  | 44.89425366 | 44.84769838 | 8.773471454 | 6.285492408 | 15.29399769 |
| ENSMUSG00000078923 | -0.31149072  | 6.613070878  | 1.686777326 | 0.194026334 | 0.999071534 | Ube2v1        | Ube2v1        | UBE2V1  | 119.3762371 | 146.92073   | 91.89210077 | 83.95234892 | 122.6952056 | 136.7201015 | 84.58288858 | 85.24774625 | 45.33411399 | 83.72483353 |
| ENSMUSG00000046727 | 0.577390666  | 3.32984541   | 1.686572744 | 0.194053374 | 0.999071534 | Cystm1        | Cystm1        | CYSTM1  | 6.105662918 | 6.581194929 | 11.44443746 | 9.435966491 | 7.586697145 | 3.492583753 | 6.083237587 | 18.23776743 | 12.96382809 | 13.85610048 |
| ENSMUSG00000024855 | -0.421163589 | 4.554441214  | 1.68612866  | 0.194112084 | 0.999071534 | Pacs1         | Pacs1         | PACS1   | 30.10723439 | 40.67297046 | 21.27318963 | 17.20676242 | 30.60839883 | 39.65537803 | 16.69654572 | 23.55711627 | 8.17114013  | 13.52930565 |
| ENSMUSG00000020163 | 0.374108646  | 7.513470394  | 1.685246384 | 0.194228788 | 0.999071534 | Uqcr11        | Uqcr11        | UQCR11  | 154.746974  | 116.0899069 | 171.8012023 | 196.7676542 | 183.1271725 | 129.4438853 | 227.9919789 | 178.7163043 | 214.806703  | 215.8806598 |
| ENSMUSG00000021451 | -0.467346374 | 4.22904382   | 1.685007412 | 0.194260412 | 0.999071534 | Sema4d        | Sema4d        | SEMA4D  | 36.14271727 | 32.49094434 | 16.5607742  | 11.51742969 | 16.48144552 | 32.16087539 | 17.66727512 | 9.878790692 | 7.6997282   | 12.28748533 |
| ENSMUSG00000006412 | 0.347792752  | 6.180677282  | 1.684930455 | 0.194270597 | 0.999071534 | Pfdn2         | Pfdn2         | PFDN2   | 54.88078623 | 50.81156806 | 93.50778605 | 60.77872534 | 70.5039614  | 51.95218333 | 67.82162757 | 91.18883716 | 81.94710727 | 87.45029451 |
| ENSMUSG00000098915 | 1.23259605   | 0.47472918   | 1.684248625 | 0.194360865 | 0.999071534 | RplI5-ps2     | RplI5-ps2     |         | 0.701800335 | 0.415030311 | 0.673202203 | 0           | 2.223687094 | 0           | 2.459181152 | 2.210638477 | 2.357059653 | 1.045743432 |
| ENSMUSG00000007850 | 0.361480476  | 8.693631817  | 1.683782888 | 0.194422553 | 0.999071534 | Hnrnph1       | Hnrnph1       | HNRNPH1 | 328.7934571 | 266.3901695 | 476.0885983 | 373.136969  | 434.3384116 | 422.6026341 | 367.2592905 | 424.8570822 | 445.7199804 | 555.2897624 |
| ENSMUSG00000087400 | -0.859437934 | 0.162344056  | 1.683774464 | 0.194423669 | 0.999071534 | Gm15270       | Gm15270       |         | 2.245761073 | 0.711480533 | 1.009803305 | 1.457024238 | 1.177246109 | 0.436572969 | 0.582437641 | 0.621742072 | 0.785686551 | 0.849666539 |
| ENSMUSG00000072255 | 0.846820779  | 0.531684332  | 1.683322203 | 0.194483594 | 0.999071534 | RplB1-ps17    | RplB1-ps17    |         | 0.631620302 | 0.830060622 | 1.144443746 | 0.485674746 | 1.831271725 | 0.509335131 | 2.006174098 | 2.486968286 | 1.649941757 | 1.241820326 |
| ENSMUSG00000015340 | -0.330197336 | 5.575882025  | 1.683217809 | 0.19449743  | 0.999071534 | Cybb          | Cybb          | CYBB    | 60.70572901 | 70.02154244 | 49.48036195 | 47.04106824 | 48.39789558 | 84.11305872 | 29.63960441 | 28.66921774 | 30.87748145 | 38.56178906 |
| ENSMUSG00000063229 | -0.398673015 | 10.14298674  | 1.682073818 | 0.194649119 | 0.999071534 | Ldha          | Ldha          | LDHA    | 1466.201261 | 2101.950654 | 847.224973  | 889.478606  | 1416.488679 | 990.584067  | 1299.483093 | 971.9210227 | 506.1392761 | 1004.82872  |
| ENSMUSG00000037608 | 0.330809202  | 6.931263114  | 1.681135027 | 0.194773702 | 0.999071534 | Bclaf1        | Bclaf1        | BCLAF1  | 81.68955904 | 106.3663397 | 130.8031881 | 114.4110937 | 126.357749  | 132.7181826 | 87.23621561 | 149.9780041 | 137.0237345 | 138.5610048 |
| ENSMUSG00000058486 | -0.474308429 | 3.089221437  | 1.680409956 | 0.194869988 | 0.999071534 | Wdr91         | Wdr91         | WDR91   | 12.562226   | 13.16238986 | 9.290190407 | 9.574730704 | 5.951633105 | 10.11394045 | 9.448432848 | 4.352194501 | 5.342688547 | 5.22871716  |
| ENSMUSG00000028344 | 0.411563884  | 3.682120445  | 1.679880629 | 0.194940315 | 0.999071534 | Invs          | Invs          | INVS    | 13.82546661 | 13.28096995 | 8.886269085 | 6.03624327  | 15.10799173 | 15.57110257 | 13.39606575 | 18.65226215 | 8.642552061 | 14.37897219 |
| ENSMUSG00000000631 | -0.345861385 | 5.354089994  | 1.679650236 | 0.194970934 | 0.999071534 | Myo18a        | Myo18a        | MYO18A  | 57.26690737 | 49.09215677 | 41.94049727 | 41.14358918 | 48.13628533 | 75.59988582 | 28.08643737 | 30.53444396 | 16.73512354 | 32.41804639 |
| ENSMUSG00000036202 | 0.28865224   | 5.062007713  | 1.679399191 | 0.195004305 | 0.999071534 | Rif1          | Rif1          | RIF1    | 29.26507399 | 31.30514345 | 31.37122268 | 26.85087523 | 37.08325242 | 51.15179955 | 45.30070544 | 29.98178434 | 25.6138156  | 28.10435474 |
| ENSMUSG00000029146 | -0.337199724 | 6.116976313  | 1.67926152  | 0.195022608 | 0.999071534 | Snx17         | Snx17         | SNX17   | 108.2176117 | 90.06157745 | 60.45355787 | 67.8557002  | 76.39019194 | 100.7755937 | 76.55819219 | 43.17653275 | 28.5204218  | 59.01914495 |
| ENSMUSG00000034116 | -0.366198952 | 4.444983347  | 1.678689484 | 0.19509868  | 0.999071534 | Vav1          | Vav1          | VAV1    | 29.96687432 | 26.02832949 | 17.30129663 | 26.29581838 | 27.0766605  | 36.23555644 | 18.31442805 | 11.32952219 | 12.17814154 | 17.18940766 |
| ENSMUSG00000059659 | 0.928137477  | -0.029755976 | 1.678273627 | 0.195154005 | 0.999071534 | Gm10069       | Gm10069       |         | 0.631620302 | 0.5336104   | 1.279084186 | 0.277528426 | 0.327012808 | 1.164194584 | 0.517722348 | 1.312566595 | 1.178529826 | 1.176461361 |
| ENSMUSG00000029521 | 0.46571281   | 3.346247263  | 1.678176325 | 0.195166952 | 0.999071534 | Chek2         | Chek2         | CHEK2   | 12.84294614 | 7.292675462 | 6.126140051 | 7.63203172  | 10.07199449 | 12.22404314 | 16.43768454 | 5.941090906 | 12.2567102  | 8.888819173 |
| ENSMUSG00000038685 | 0.352880844  | 4.359996229  | 1.677498606 | 0.195257161 | 0.999071534 | Rtel1         | Rtel1         | RTEL1   | 21.40491023 | 10.19788764 | 22.14835249 | 17.83120138 | 21.51744277 | 32.81573485 | 21.03247038 | 16.57978857 | 17.36367278 | 24.70568858 |
| ENSMUSG00000031608 | 0.30548518   | 6.232267077  | 1.676299366 | 0.195416906 | 0.999071534 | Galnt7        | Galnt7        | GALNT7  | 53.89826576 | 68.53929133 | 52.57709209 | 82.21779626 | 90.45174269 | 87.46011815 | 94.16075201 | 71.01676106 | 78.5686551  | 66.66614379 |

|                     |              |              |             |             |             |               |               |          |             |             |             |             |             |             |             |             |             |             |
|---------------------|--------------|--------------|-------------|-------------|-------------|---------------|---------------|----------|-------------|-------------|-------------|-------------|-------------|-------------|-------------|-------------|-------------|-------------|
| ENSMUSG00000033952  | 0.395062432  | 4.560207433  | 1.673508415 | 0.195789269 | 0.999071534 | Aspm          | Aspm          | ASPM     | 18.03626862 | 9.189956883 | 28.88037453 | 20.19019301 | 28.90793223 | 35.28964834 | 29.25131265 | 18.92859196 | 24.6705577  | 21.30702243 |
| ENSMUSG000000027326 | 0.501659611  | 3.543745685  | 1.67316603  | 0.195835007 | 0.999071534 | Casc5         | Casc5         | CASC5    | 15.43960738 | 8.47847635  | 6.126140051 | 10.47669809 | 9.90956062  | 26.41266463 | 19.15572687 | 6.148338263 | 7.935434165 | 8.823460208 |
| ENSMUSG000000040663 | 0.335892553  | 6.039994331  | 1.673156796 | 0.195836241 | 0.999071534 | Clc1          | Clc1          | CLCF1    | 60.21446878 | 53.77607028 | 68.46466409 | 46.83292192 | 73.12006386 | 48.38683741 | 52.22524184 | 84.48783928 | 65.99767028 | 94.77049853 |
| ENSMUSG000000027950 | -0.894282433 | 0.290133356  | 1.673095104 | 0.195844483 | 0.999071534 | Chrb2         | Chrb2         | CHRN2    | 1.333420637 | 1.304380977 | 1.548365068 | 2.428373729 | 0.654025616 | 0.654859454 | 0.19414588  | 1.036236786 | 1.021392516 | 0.653589645 |
| ENSMUSG00000039001  | 0.389826996  | 9.270507246  | 1.672964558 | 0.195861926 | 0.999071534 | Rps21         | Rps21         | RPS21    | 688.7468492 | 577.0107122 | 458.1814196 | 584.4748656 | 464.2927848 | 432.6438124 | 1026.966992 | 566.4070272 | 644.4201091 | 638.4917242 |
| ENSMUSG00000000753  | -0.400275601 | 5.721974431  | 1.67263837  | 0.195905519 | 0.999071534 | Serpinf1      | Serpinf1      | SERPINF1 | 58.45996794 | 47.01700521 | 88.52608975 | 72.22677292 | 42.90408041 | 84.69515601 | 58.50262531 | 19.06675686 | 31.97744262 | 33.79058465 |
| ENSMUSG000000081763 | -0.872720607 | 0.363239806  | 1.672365217 | 0.195942032 | 0.999071534 | Gm9435        | Gm9435        |          | 2.666841275 | 2.01586151  | 0.875162864 | 0.901967385 | 1.308051232 | 0.9459081   | 1.553167044 | 0.690824524 | 0.549980586 | 0.196076894 |
| ENSMUSG00000038542  | -0.312871677 | 4.89121195   | 1.671695679 | 0.196031566 | 0.999071534 | Pcid2         | Pcid2         | PCID2    | 31.44065503 | 34.15106558 | 27.87057122 | 39.06212599 | 37.01784986 | 38.2001348  | 16.56711513 | 25.69867229 | 19.01361453 | 30.06512367 |
| ENSMUSG00000001864  | 0.38464883   | 5.142625147  | 1.671352924 | 0.196077419 | 0.999071534 | Aif1l         | Aif1l         | AIF1L    | 30.66867466 | 44.58611339 | 26.99540836 | 22.89609516 | 34.07473459 | 23.28389169 | 37.79373139 | 66.11190694 | 27.49902928 | 34.37881533 |
| ENSMUSG000000066839 | 0.3949817    | 3.489886303  | 1.670000728 | 0.196258437 | 0.999071534 | Ecsit         | Ecsit         | ECSIT    | 9.755024662 | 8.952796705 | 9.89607239  | 7.978942253 | 13.40752513 | 16.29872418 | 15.66110102 | 9.464295978 | 9.506807267 | 10.78422914 |
| ENSMUSG000000024037 | 0.374252051  | 4.597533692  | 1.669780933 | 0.196287879 | 0.999071534 | Wdr4          | Wdr4          | WDR4     | 30.38795452 | 20.33648523 | 20.73462787 | 14.98653501 | 23.08710424 | 38.78223209 | 37.08186316 | 14.30006765 | 23.9634398  | 18.95409971 |
| ENSMUSG000000020386 | 0.32575165   | 6.582149158  | 1.669601439 | 0.196311927 | 0.999071534 | Sar1b         | Sar1b         | SAR1B    | 99.02402733 | 88.28287612 | 81.65942727 | 90.82117747 | 80.70676101 | 72.32558855 | 148.1333068 | 92.84681602 | 100.6446472 | 89.21498655 |
| ENSMUSG000000061589 | 0.331146656  | 4.716927261  | 1.66929866  | 0.1963525   | 0.999071534 | Dot1l         | Dot1l         | DOT1L    | 26.59823271 | 26.26548967 | 25.17776241 | 15.68035608 | 27.27286819 | 39.21880506 | 16.63183042 | 32.19242282 | 24.19914577 | 29.67296989 |
| ENSMUSG000000021388 | 0.738337947  | 2.308126077  | 1.66879555  | 0.196419938 | 0.999071534 | Aspn          | Aspn          | ASPN     | 2.877381375 | 4.624623464 | 4.375814322 | 4.162926393 | 2.616102464 | 5.020589145 | 17.21426807 | 1.72706131  | 3.69272679  | 1.699333077 |
| ENSMUSG000000074305 | -0.339982399 | 5.198789042  | 1.668699204 | 0.196432856 | 0.999071534 | C230081A13Rik | Peak1         | PEAK1    | 34.9496567  | 62.43241676 | 30.09213849 | 48.15118194 | 36.03681144 | 54.78990763 | 23.94465859 | 25.42234248 | 22.47063536 | 34.11737947 |
| ENSMUSG000000037134 | 0.339400487  | 4.39313572   | 1.668454708 | 0.196465642 | 0.999071534 | Prmt10        | Prmt9         | PRMT9    | 15.93086761 | 23.71601776 | 14.94508892 | 18.45564034 | 22.69468887 | 22.19245926 | 17.14955277 | 22.58996193 | 24.12057712 | 24.77104755 |
| ENSMUSG000000060301 | 0.375246185  | 3.978434598  | 1.668334753 | 0.196481729 | 0.999071534 | 2610008E11Rik | 2610008E11Rik |          | 11.86042567 | 17.4905631  | 10.29999371 | 16.09664872 | 14.71557636 | 13.82481069 | 17.79670571 | 18.03052007 | 17.36367278 | 16.53581802 |
| ENSMUSG000000027274 | 0.303935704  | 5.313748048  | 1.667609359 | 0.196579047 | 0.999071534 | Mkks          | Mkks          | MKKS     | 42.73964043 | 33.67674522 | 33.52546973 | 38.02139439 | 36.16761656 | 37.61803751 | 65.03886995 | 37.4426892  | 32.44885456 | 38.3003532  |
| ENSMUSG000000020184 | 0.317384     | 6.095634439  | 1.667282084 | 0.196622973 | 0.999071534 | Mdm2          | Mdm2          | MDM2     | 61.26716928 | 83.59896261 | 51.76924944 | 46.41662928 | 74.03569973 | 68.03262102 | 85.87719445 | 100.1004735 | 53.74096009 | 56.5355043  |
| ENSMUSG000000038600 | 0.735995623  | 1.64204289   | 1.666716533 | 0.196698906 | 0.999071534 | Atp6v0a4      | Atp6v0a4      | ATP6V0A4 | 3.158101509 | 3.379532531 | 2.760129034 | 1.318260024 | 1.046440986 | 6.184783729 | 6.989251696 | 1.036236786 | 1.414235792 | 3.267948225 |
| ENSMUSG000000064348 | 0.829167034  | 3.08217926   | 1.666690118 | 0.196702453 | 0.999071534 | mt-Tn         | mt-Tn         |          | 12.562226   | 1.067220799 | 8.953589305 | 5.966861163 | 2.746907587 | 6.184783729 | 3.818202315 | 4.283112048 | 26.32049946 | 5.94766577  |
| ENSMUSG000000052949 | -0.438379688 | 3.491205219  | 1.665386549 | 0.196877609 | 0.999071534 | Rnf157        | Rnf157        | RNF157   | 18.10644865 | 11.32439848 | 13.12744297 | 9.782877023 | 14.38856355 | 19.35473496 | 7.959981098 | 7.599069763 | 4.949852571 | 8.039152634 |
| ENSMUSG000000020530 | 0.409155637  | 7.577249612  | 1.664461727 | 0.197001986 | 0.999071534 | Ggnbp2        | Ggnbp2        | GGNBP2   | 141.3425876 | 140.161665  | 212.1260143 | 195.7269226 | 157.8163811 | 129.8804583 | 143.6032362 | 223.0672388 | 274.2831749 | 235.0308364 |
| ENSMUSG000000084022 | 1.675105596  | -0.737218119 | 1.664045837 | 0.197057947 | 0.999071534 | Gm16459       | Gm16459       |          | 0.070180034 | 0.059290044 | 0.471241542 | 0.555056852 | 0           | 0           | 0           | 0.552659619 | 1.257098482 | 1.503256184 |
| ENSMUSG000000030107 | -0.472045273 | 3.497035432  | 1.663440641 | 0.197139415 | 0.999071534 | Usp18         | Usp18         | USP18    | 16.42212785 | 19.26926443 | 7.741825339 | 12.07248654 | 11.96866877 | 15.78938905 | 5.306654065 | 12.84933615 | 5.185531236 | 7.450921954 |
| ENSMUSG000000024669 | -1.240129368 | -0.072836615 | 1.661763272 | 0.197365418 | 0.999071534 | Cd5           | Cd5           | CD5      | 2.315941107 | 1.363671021 | 0.336601102 | 1.248877918 | 0.654025616 | 0.9459081   | 1.359021163 | 0.069082452 | 0.078568655 | 0           |
| ENSMUSG000000073406 | -0.660776582 | 4.403866685  | 1.661438742 | 0.19740918  | 0.999071534 | H2-BI         | H2-BI         | HLA-B    | 43.23090066 | 45.83120433 | 9.694111729 | 8.742145425 | 28.18850405 | 39.07328074 | 22.00319978 | 14.09282029 | 2.592765618 | 7.646998847 |
| ENSMUSG000000031821 | 0.4493653    | 4.844031884  | 1.660292835 | 0.19756379  | 0.999071534 | Gins2         | Gins2         | GIN2     | 36.21289731 | 18.5577839  | 15.82025178 | 29.83430582 | 24.91837597 | 48.0230266  | 63.16212644 | 19.13583931 | 16.73512354 | 17.84299731 |
| ENSMUSG000000046798 | 0.297190432  | 6.062355753  | 1.660289287 | 0.197564269 | 0.999071534 | Cldn12        | Cldn12        | CLDN12   | 60.98644915 | 54.72471099 | 59.2417939  | 75.76526035 | 58.66609775 | 82.439529   | 104.5799143 | 56.99302322 | 52.79813623 | 61.37206767 |
| ENSMUSG000000015947 | -0.380748848 | 5.223842265  | 1.659513002 | 0.19766909  | 0.999071534 | Fcgr1         | Fcgr1         | FCGR1B   | 57.96870771 | 37.58988815 | 42.20977815 | 36.49498804 | 45.19317006 | 58.35525354 | 44.6535525  | 23.76436362 | 10.8424744  | 27.12397027 |
| ENSMUSG000000024598 | 1.253243594  | -0.054141377 | 1.659127946 | 0.197721108 | 0.999071534 | Fbn2          | Fbn2          | FBN2     | 0.631620302 | 0.118580089 | 0.740522424 | 0.069382107 | 0.981038424 | 1.382481069 | 2.523896446 | 0.207247357 | 0           | 1.764692042 |
| ENSMUSG000000072941 | 0.640152854  | 2.498002293  | 1.658906042 | 0.197751093 | 0.999071534 | Sod3          | Sod3          | SOD3     | 4.000261912 | 5.276813952 | 4.443134543 | 6.105625376 | 2.354492217 | 11.05984855 | 11.97232929 | 6.493750525 | 1.414235792 | 3.202589261 |
| ENSMUSG000000046417 | 0.417172641  | 3.37957646   | 1.658407886 | 0.197818425 | 0.999071534 | Fam211a       | Lrrc75a       | LRRC75A  | 7.298723488 | 11.02794826 | 11.64639812 | 6.521918016 | 9.287163747 | 12.87890259 | 11.13103048 | 11.95126426 | 12.02100423 | 8.235229528 |
| ENSMUSG000000033036 | 0.395570691  | 4.257618299  | 1.657243343 | 0.197975933 | 0.999071534 | Gm7879        | Gm7879        | PPIH     | 19.01878909 | 10.5536279  | 15.5509709  | 22.54918463 | 17.07006858 | 18.40882687 | 32.22821615 | 15.33630443 | 20.50641898 | 16.40510009 |
| ENSMUSG000000063623 | 0.697930572  | 1.715857258  | 1.656285171 | 0.19810564  | 0.999071534 | C230062I16Rik | C230062I16Rik |          | 1.333420637 | 2.075151554 | 2.01960661  | 3.469105327 | 3.531738326 | 1.528005392 | 1.812028217 | 5.802926001 | 3.378452169 | 5.751588876 |
| ENSMUSG000000021930 | 0.412369098  | 3.953273837  | 1.655887501 | 0.198159501 | 0.999071534 | Spryd7        | Spryd7        | SPRYD7   | 14.73780704 | 12.6880695  | 13.26208341 | 16.58232347 | 10.85682522 | 15.42557824 | 31.7104938  | 14.09282029 | 10.21392516 | 13.79074151 |
| ENSMUSG000000021810 | 0.28815124   | 5.554423588  | 1.655505382 | 0.198211272 | 0.999071534 | Ecd           | Ecd           | ECD      | 40.70441945 | 37.35272798 | 51.23068768 | 41.49049972 | 48.2016879  | 52.97085359 | 45.6889972  | 37.85718391 | 56.64800033 | 51.89501782 |
| ENSMUSG000000028689 | 0.467399125  | 3.004442121  | 1.655077631 | 0.198269245 | 0.999071534 | Ccdc163       | Ccdc163       | CCDC163P | 8.000523824 | 6.284744707 | 4.577774983 | 6.244389589 | 9.41796887  | 7.931075606 | 8.024669391 | 11.67493445 | 5.185531236 | 11.50317775 |
| ENSMUSG000000019370 | -0.357276226 | 7.461245068  | 1.654654996 | 0.198326544 | 0.999071534 | Calm3         | Calm3         | CALM3    | 253.8411813 | 193.7005751 | 190.7855044 | 199.6817026 | 189.2750133 | 278.38803   | 185.7976076 | 113.157057  | 77.31155662 | 125.5545708 |

|                    |              |              |             |             |             |               |               |           |             |             |             |             |             |             |             |             |             |             |
|--------------------|--------------|--------------|-------------|-------------|-------------|---------------|---------------|-----------|-------------|-------------|-------------|-------------|-------------|-------------|-------------|-------------|-------------|-------------|
| ENSMUSG00000040280 | -0.906746078 | 0.625097858  | 1.654532845 | 0.198343108 | 0.999071534 | Ndufa4l2      | Ndufa4l2      | NDUFA4L2  | 1.403600671 | 2.253021687 | 1.481044848 | 1.318260024 | 3.073920395 | 1.673529715 | 2.135604685 | 0.828989429 | 0.15713731  | 0.130717929 |
| ENSMUSG00000057948 | 0.493638655  | 4.462095633  | 1.654498852 | 0.198347718 | 0.999071534 | Unc13d        | Unc13d        | UNC13D    | 17.47482835 | 10.31646773 | 24.03331866 | 26.08767206 | 15.76201734 | 15.42557824 | 11.77818341 | 22.58996193 | 41.24854393 | 25.35927823 |
| ENSMUSG00000036718 | -0.328181968 | 4.44210937   | 1.65401877  | 0.198412836 | 0.999071534 | Mical2        | Mical2        | MICAL2    | 31.86173523 | 27.33271047 | 22.41673337 | 19.77390037 | 23.93733754 | 31.72430242 | 16.17882337 | 13.74740803 | 15.63516236 | 17.38548456 |
| ENSMUSG00000046711 | -0.735264575 | 5.381212216  | 1.653795498 | 0.19844313  | 0.999071534 | Hmga1         | Hmga1         | HMGA1     | 79.02271777 | 73.57894511 | 52.30781121 | 16.16603083 | 51.66802366 | 79.2379939  | 54.6197077  | 18.79042705 | 1.492804447 | 11.50317775 |
| ENSMUSG00000022309 | -0.347374827 | 5.60265136   | 1.65375624  | 0.198448457 | 0.999071534 | Angpt1        | Angpt1        | ANGPT1    | 41.96766006 | 81.93884137 | 43.48886234 | 59.39108321 | 54.48033381 | 35.72622131 | 46.72444189 | 63.27952639 | 28.67755911 | 30.39191849 |
| ENSMUSG00000097375 | 0.586853259  | 3.470611772  | 1.652898915 | 0.198564832 | 0.999071534 | 6720427107Rik | 6720427107Rik |           | 5.474042616 | 4.091013064 | 13.39672385 | 13.39074656 | 8.633138131 | 4.147443207 | 9.966155196 | 13.47107822 | 15.3994564  | 17.51620249 |
| ENSMUSG00000038930 | 0.499149568  | 2.386932244  | 1.65279372  | 0.198579117 | 0.999071534 | Rccd1         | Rccd1         | RCCD1     | 4.070441945 | 3.557402664 | 4.779735644 | 4.717983245 | 4.774386997 | 5.602686437 | 4.012348196 | 5.664761096 | 5.499805857 | 7.777716776 |
| ENSMUSG00000053846 | -0.526235177 | 4.668086919  | 1.652236226 | 0.198654842 | 0.999071534 | Lipg          | Lipg          | LIPG      | 19.43986929 | 75.06119622 | 13.19476319 | 19.98204669 | 28.18850405 | 22.41074575 | 19.47930334 | 29.42912472 | 6.992610304 | 23.85602204 |
| ENSMUSG00000030166 | 0.514174769  | 3.777778517  | 1.652065408 | 0.198678051 | 0.999071534 | Rad52         | Rad52         | RAD52     | 8.561964092 | 12.74735955 | 11.84835878 | 9.227820171 | 15.89282247 | 7.421740475 | 6.083237587 | 22.31363212 | 16.18514295 | 22.2874069  |
| ENSMUSG00000025995 | 0.293117947  | 6.232746748  | 1.651528511 | 0.19875102  | 0.999071534 | Wdr75         | Wdr75         | WDR75     | 69.12733304 | 56.32554219 | 88.86269085 | 72.43491924 | 62.65565401 | 102.1580748 | 94.16075201 | 53.81523041 | 71.65461345 | 79.7379367  |
| ENSMUSG00000016409 | 0.418281201  | 6.05180632   | 1.6512372   | 0.198790625 | 0.999071534 | Nkap          | Nkap          | NKAP      | 43.86252096 | 45.23830388 | 77.62021405 | 72.50430134 | 53.04147745 | 40.67404829 | 41.87079488 | 77.9250063  | 98.60366215 | 89.21498655 |
| ENSMUSG00000054580 | 1.1365072    | -0.417768359 | 1.650694675 | 0.198864408 | 0.999071534 | Pla2r1        | Pla2r1        | PLA2R1    | 0.771980369 | 0.474320355 | 0           | 0.485674746 | 0.261610246 | 0.363810808 | 1.100159989 | 0.414494714 | 0.549980586 | 1.633974113 |
| ENSMUSG00000047735 | 0.285795875  | 5.143662692  | 1.649946317 | 0.198966238 | 0.999071534 | Samd9l        | Samd9l        | SAMD9L    | 31.30029496 | 41.62161117 | 27.06272858 | 29.34863107 | 35.77520119 | 48.09578877 | 31.64577851 | 45.45625368 | 26.87048004 | 36.79709702 |
| ENSMUSG00000068250 | 0.368631007  | 4.397322691  | 1.64937753  | 0.199043674 | 0.999071534 | Amn1          | Amn1          | AMN1      | 18.17662869 | 17.25340292 | 20.46534698 | 19.42698983 | 19.42456079 | 14.04309717 | 17.73199041 | 25.62958984 | 26.32049946 | 26.27430373 |
| ENSMUSG00000025357 | 0.456467731  | 4.712163842  | 1.648726217 | 0.199132388 | 0.999071534 | Dgka          | Dgka          | DGKA      | 17.40464832 | 27.92561092 | 21.07122897 | 18.66378666 | 29.43115272 | 16.29872418 | 11.77818341 | 48.28863422 | 26.16336215 | 38.95394284 |
| ENSMUSG00000068264 | -0.420967318 | 3.401733591  | 1.648550327 | 0.199156354 | 0.999071534 | Ap5s1         | Ap5s1         | AP5S1     | 14.94834714 | 10.25717768 | 12.2522801  | 13.94580342 | 10.46440986 | 10.47775126 | 8.024696391 | 5.802926001 | 6.285492408 | 12.94107497 |
| ENSMUSG00000028710 | 0.385234698  | 3.559464398  | 1.647122304 | 0.199351054 | 0.999071534 | Atpf1         | Atpf1         | ATPAF1    | 12.21132584 | 10.43504782 | 7.405224238 | 10.89299073 | 11.5762534  | 12.51509178 | 16.11410808 | 10.84594503 | 10.37106247 | 13.79074151 |
| ENSMUSG00000024939 | -0.350002275 | 5.530465295  | 1.646856443 | 0.199387327 | 0.999071534 | Fam89b        | Fam89b        | FAM89B    | 72.00471441 | 59.34933445 | 50.35552482 | 32.74835429 | 55.65757992 | 69.63338858 | 54.29613123 | 30.94893867 | 20.11357571 | 29.0847392  |
| ENSMUSG00000097973 | -0.895113473 | -0.105146941 | 1.64538242  | 0.199588575 | 0.999071534 | Gm4929        | Gm4929        |           | 0.98252047  | 1.126510844 | 0.605881983 | 1.248877918 | 1.373453794 | 1.018670261 | 0.388291761 | 0.552659619 | 0.15713731  | 0.653589645 |
| ENSMUSG00000066158 | 0.798408125  | 1.769373365  | 1.645327273 | 0.199596109 | 0.999071534 | AY512931      | AY512931      |           | 0.631620302 | 1.245090933 | 4.375814322 | 4.371072713 | 1.63506404  | 2.110102684 | 1.359021163 | 4.214029596 | 6.128355098 | 5.294076125 |
| ENSMUSG00000020610 | -0.274594568 | 5.107543765  | 1.644944034 | 0.199648474 | 0.999071534 | Amz2          | Amz2          | AMZ2      | 45.68720184 | 42.57025188 | 32.91958775 | 33.23402904 | 41.39982149 | 37.83632399 | 29.18659736 | 25.56050739 | 23.0991846  | 35.88207151 |
| ENSMUSG00000037204 | -0.314090213 | 4.844721989  | 1.644767423 | 0.199672612 | 0.999071534 | 9430023L20Rik | Atg101        | ATG101    | 35.93217717 | 29.28928194 | 28.81305431 | 38.36830492 | 31.78564494 | 32.81573485 | 32.81065379 | 19.41216912 | 13.51380868 | 27.51612406 |
| ENSMUSG00000029550 | -0.290436652 | 5.817870492  | 1.644619976 | 0.199692766 | 0.999071534 | Sppl3         | Sppl3         | SPPL3     | 51.09106442 | 59.58649463 | 76.87969163 | 70.63098447 | 62.06703095 | 56.5361995  | 33.13423026 | 54.57513739 | 46.04123189 | 53.00612021 |
| ENSMUSG00000078453 | 0.381698608  | 8.06846081   | 1.644606618 | 0.199694592 | 0.999071534 | Abrac1        | Abrac1        | ABRACL    | 253.4201011 | 155.1620462 | 292.9102787 | 276.4876946 | 227.0122913 | 207.8814955 | 327.2005238 | 279.0240252 | 327.9455664 | 281.5664191 |
| ENSMUSG00000047423 | -0.272798482 | 5.288530953  | 1.644396873 | 0.199723266 | 0.999071534 | Al837181      | Al837181      | C11orf68  | 47.37152264 | 37.94562842 | 42.81566014 | 37.25819122 | 56.63861834 | 48.75064822 | 29.51017383 | 33.0904947  | 25.53481291 | 36.20886634 |
| ENSMUSG00000029860 | -0.380751639 | 8.387398309  | 1.644281792 | 0.199739    | 0.999071534 | Zyx           | Zyx           | ZYX       | 457.7141788 | 493.8267799 | 323.2716981 | 290.9191728 | 409.9432561 | 542.6602006 | 262.4205151 | 262.651484  | 122.8813766 | 285.8147518 |
| ENSMUSG00000039103 | 0.486943262  | 6.44711031   | 1.643720732 | 0.199815732 | 0.999071534 | Nexn          | Nexn          | NEXN      | 38.24811828 | 39.84290984 | 129.6587444 | 91.93129118 | 73.9048946  | 98.66549102 | 44.07111486 | 71.01676106 | 148.6518954 | 110.3259321 |
| ENSMUSG00000036661 | -0.580204882 | 2.424386707  | 1.643691199 | 0.199819664 | 0.999071534 | Dennd3        | Dennd3        | DENND3    | 7.649623656 | 8.359896261 | 4.847055865 | 8.187088573 | 3.335530641 | 8.440410737 | 2.78275762  | 4.352194501 | 1.414235792 | 4.379050622 |
| ENSMUSG00000028655 | 0.660241499  | 1.805702245  | 1.643126926 | 0.199896981 | 0.999071534 | Mfsd2a        | Mfsd2a        | MFSD2A    | 3.158101509 | 0.830060622 | 3.500651458 | 3.191576901 | 2.812310149 | 6.475832375 | 5.500799946 | 1.519813953 | 2.435628308 | 4.64048648  |
| ENSMUSG00000079852 | 0.427469021  | 7.075301324  | 1.642892153 | 0.199929115 | 0.999071534 | Klra4         | Klra4         |           | 167.8706402 | 74.88332609 | 110.9437231 | 140.4293837 | 100.7199449 | 111.7626801 | 282.029249  | 82.34628325 | 129.4811436 | 132.8094159 |
| ENSMUSG00000033983 | 0.469430201  | 2.893986438  | 1.642493583 | 0.199983682 | 0.999071534 | Coil          | Coil          | COIL      | 6.456563086 | 8.300606217 | 6.462741153 | 5.134275885 | 5.493815174 | 12.58785394 | 11.45460695 | 4.973936572 | 5.028393926 | 8.104511599 |
| ENSMUSG00000075279 | 0.32962884   | 5.670387131  | 1.642233946 | 0.200019237 | 0.999071534 | Mrp123-ps1    | Mrp123-ps1    |           | 48.21368304 | 32.13520407 | 51.09604724 | 53.49360415 | 48.00548021 | 40.74681045 | 43.35924663 | 50.15386044 | 58.84792267 | 73.13668128 |
| ENSMUSG00000019539 | -0.468276163 | 5.0814242    | 1.641524048 | 0.200116491 | 0.999071534 | Rcn3          | Rcn3          | RCN3      | 32.4231755  | 45.41617402 | 43.28690168 | 50.44079146 | 30.41219114 | 56.82724815 | 49.50719951 | 13.19474841 | 11.31388633 | 14.24825426 |
| ENSMUSG00000038208 | -0.444113189 | 3.00662831   | 1.640674859 | 0.2002329   | 0.999071534 | Pgap3         | Pgap3         | PGAP3     | 9.12340436  | 7.055515284 | 7.068623136 | 12.6969255  | 11.11843547 | 7.64002696  | 7.44225875  | 5.941090906 | 5.499805857 | 5.882306805 |
| ENSMUSG00000052305 | -0.792167622 | 7.462871399  | 1.640642521 | 0.200237335 | 0.999071534 | Hbb-bs        | Hbb-bs        | HBB       | 166.6775797 | 767.3910448 | 41.80585683 | 108.6523789 | 85.74275825 | 41.40166991 | 267.1447315 | 156.679002  | 88.9391757  | 54.77081226 |
| ENSMUSG00000021556 | 0.335023393  | 4.986075535  | 1.639587429 | 0.200382084 | 0.999071534 | Golm1         | Golm1         | GOLM1     | 36.56379748 | 32.66881447 | 24.90848153 | 17.20676242 | 34.72876021 | 53.91676169 | 43.16510075 | 30.46536151 | 24.98483232 | 21.56845829 |
| ENSMUSG00000014837 | 0.59738136   | 2.795542868  | 1.638725292 | 0.200500453 | 0.999071534 | 4931428F04Rik | 4931428F04Rik | KIAA0895L | 3.930081878 | 8.715636528 | 5.92417939  | 1.457024238 | 8.436930446 | 15.4983404  | 6.018522294 | 4.421276953 | 8.406846095 | 6.209101628 |
| ENSMUSG00000038324 | -0.311764925 | 6.618189766  | 1.638668288 | 0.200508282 | 0.999071534 | Trpc4ap       | Trpc4ap       | TRPC4AP   | 130.7454025 | 142.7704269 | 89.6705335  | 60.61303115 | 112.5578085 | 137.3021988 | 74.55201809 | 84.41875683 | 44.15558417 | 96.99270333 |
| ENSMUSG00000015396 | -0.634353659 | 2.45631974   | 1.638350131 | 0.200551987 | 0.999071534 | Cd83          | Cd83          | CD83      | 9.755024662 | 12.21374915 | 2.962089695 | 5.550568524 | 3.400933203 | 6.403070214 | 6.859821109 | 2.832380548 | 1.335667137 | 3.660102012 |

|                     |              |              |             |             |             |               |               |          |             |             |             |             |             |             |             |             |             |             |
|---------------------|--------------|--------------|-------------|-------------|-------------|---------------|---------------|----------|-------------|-------------|-------------|-------------|-------------|-------------|-------------|-------------|-------------|-------------|
| ENSMUSG00000029780  | 0.297335089  | 5.120020434  | 1.637981512 | 0.200602638 | 0.999071534 | Nt5c3         | Nt5c3         | NT5C3A   | 39.79207902 | 30.00076247 | 31.1019418  | 30.94441952 | 29.6273604  | 36.23555644 | 52.41938772 | 31.08710358 | 32.68456052 | 31.04550814 |
| ENSMUSG00000031808  | -0.424652642 | 4.164421747  | 1.637677919 | 0.200644365 | 0.999071534 | Slc27a1       | Slc27a1       | SLC27A1  | 19.93112953 | 36.70053749 | 12.85816209 | 12.21125075 | 25.04918109 | 19.06368632 | 15.40223985 | 18.7213446  | 6.521198373 | 15.42471562 |
| ENSMUSG00000031495  | -1.123169031 | -0.432142582 | 1.637515313 | 0.200666718 | 0.999071534 | Cd209d        | Cd209d        | CLEC4M   | 1.754500839 | 0.592900444 | 0.538561763 | 1.040731598 | 0.39241537  | 0.582097292 | 0.19414588  | 0           | 0.471411931 | 0.588230681 |
| ENSMUSG00000038046  | 0.445227851  | 3.04033456   | 1.637182626 | 0.200712462 | 0.999071534 | Rnmtl1        | Rnmtl1        | MRM3     | 7.71980369  | 4.506043375 | 6.732022034 | 8.325852786 | 8.240722761 | 9.240794513 | 10.35444696 | 6.839162787 | 7.385453579 | 11.24174189 |
| ENSMUSG00000093249  | 1.029017805  | 2.489441961  | 1.636501194 | 0.200806195 | 0.999071534 | Gm24576       | Gm24576       |          | 0.631620302 | 1.067220799 | 7.068623136 | 7.701413827 | 1.896674286 | 0.363810808 | 1.100159989 | 5.526596192 | 13.1209654  | 12.48356222 |
| ENSMUSG00000005802  | 0.314724927  | 7.094070137  | 1.636475058 | 0.200809791 | 0.999071534 | Slc30a4       | Slc30a4       | SLC30A4  | 100.7785282 | 145.7349292 | 110.9437231 | 134.809433  | 138.3918203 | 136.938388  | 185.0210241 | 141.0663678 | 133.723851  | 126.7963911 |
| ENSMUSG00000000248  | -1.127999785 | -0.625247718 | 1.635755372 | 0.200908844 | 0.999071534 | Clec2g        | Clec2g        | CLEC2A   | 1.052700503 | 0.415030311 | 0.673202203 | 0.901967385 | 0.588623054 | 1.018670261 | 0.258861174 | 0.207247357 | 0           | 0.196076894 |
| ENSMUSG00000021948  | -0.289924109 | 6.189171144  | 1.634790297 | 0.201041761 | 0.999071534 | Prkcd         | Prkcd         | PRKCD    | 102.9541092 | 90.6544779  | 79.70714088 | 64.31721277 | 79.98733283 | 93.13556675 | 51.77223478 | 76.88876951 | 38.65577831 | 63.26747764 |
| ENSMUSG00000036545  | -0.303318234 | 5.402626497  | 1.634547421 | 0.201075228 | 0.999071534 | Adamts2       | Adamts2       | ADAMTS2  | 35.86199714 | 60.71300547 | 57.49146817 | 50.51017357 | 36.42922681 | 51.51561036 | 33.52252202 | 42.48570822 | 23.0991846  | 35.29384083 |
| ENSMUSG00000024277  | -0.299829669 | 5.694821171  | 1.633959739 | 0.201156235 | 0.999071534 | Mapre2        | Mapre2        | MAPRE2   | 48.63476324 | 72.57101435 | 54.73133914 | 52.79978308 | 67.69165125 | 55.73581573 | 29.70431971 | 60.5162283  | 30.72034414 | 49.08458234 |
| ENSMUSG00000080054  | -1.567906108 | 0.485897374  | 1.63340433  | 0.201232828 | 0.999071534 | Rpl12-ps1     | Rpl12-ps1     |          | 3.789721811 | 0           | 1.95228639  | 3.191576901 | 0.784830739 | 0           | 0.906014109 | 0           | 0           | 2.156845829 |
| ENSMUSG00000082110  | 1.691513076  | 2.115594283  | 1.63306293  | 0.201279925 | 0.999071534 | Gm11196       | Gm11196       |          | 0           | 0           | 1.077123525 | 5.342422204 | 3.662543449 | 7.64002696  | 0           | 0           | 7.542590889 | 15.68615148 |
| ENSMUSG00000029234  | 0.292117888  | 6.334308236  | 1.632520319 | 0.201354807 | 0.999071534 | Tmem165       | Tmem165       | TMEM165  | 65.26743119 | 72.21527409 | 62.27120382 | 89.15600692 | 86.0043685  | 87.7511668  | 119.07614   | 76.05978009 | 68.35472994 | 77.05821915 |
| ENSMUSG000000086891 | 0.956308715  | -0.165467721 | 1.632382922 | 0.201373774 | 0.999071534 | Gm15963       | Gm15963       |          | 0.561440268 | 0.415030311 | 0.942483085 | 0.624438959 | 0.130805123 | 0.873145938 | 0.453007054 | 1.588896405 | 0.864255206 | 1.045743432 |
| ENSMUSG000000074794 | -0.340521161 | 6.148841705  | 1.63222798  | 0.201395164 | 0.999071534 | Arrdc3        | Arrdc3        | ARRDC3   | 83.44405988 | 111.5838636 | 71.62871444 | 75.41834982 | 68.99970248 | 42.12929152 | 49.37776892 | 85.93857078 | 61.99066887 | 53.85578675 |
| ENSMUSG000000092564 | -0.747930052 | 0.671866602  | 1.631883368 | 0.20144275  | 0.999071534 | BC051226      | BC051226      |          | 2.596661241 | 1.422961066 | 2.288887492 | 1.248877918 | 1.962076848 | 1.382481069 | 1.747312924 | 0.690824524 | 0.31427462  | 1.241820326 |
| ENSMUSG00000026809  | -1.101051347 | -0.42588764  | 1.631664552 | 0.201472972 | 0.999071534 | 1700026L60Rik | Spaca9        | SPACA9   | 1.543960738 | 0.355740266 | 1.817645949 | 0.346910533 | 0.261610246 | 0.727621615 | 0.258861174 | 0.345412262 | 0.078568655 | 0.522871716 |
| ENSMUSG00000034601  | -0.514653425 | 2.649054475  | 1.63107501  | 0.201554424 | 0.999071534 | 2700049A03Rik | 2700049A03Rik | KIAA0586 | 5.333682549 | 11.85800888 | 8.347707322 | 3.607869541 | 8.567735569 | 7.567264798 | 4.853647011 | 5.733843549 | 2.985608894 | 3.856178906 |
| ENSMUSG000000098650 | 0.306870024  | 5.653828068  | 1.630829734 | 0.201588323 | 0.999071534 | RP23-242C19.7 | Gm28048       | COMMD1   | 34.5285765  | 57.09631276 | 48.40323843 | 49.40005986 | 42.96948297 | 42.63862665 | 69.05121814 | 53.88431287 | 52.40529295 | 45.2937624  |
| ENSMUSG00000031258  | 0.976204724  | 0.909315918  | 1.630174286 | 0.201678944 | 0.999071534 | Xkrx          | Xkrx          | XKRX     | 0.701800335 | 0.5336104   | 1.88496617  | 2.358991623 | 0.588623054 | 0.873145938 | 0.19414588  | 1.381649048 | 4.16413872  | 3.92153787  |
| ENSMUSG00000029275  | -1.907168464 | -0.874554669 | 1.630077018 | 0.201692396 | 0.999071534 | Gfi1          | Gfi1          | GF11     | 1.122880537 | 2.193731643 | 0           | 0           | 0           | 0.363810808 | 0.19414588  | 0.27632981  | 0           | 0           |
| ENSMUSG00000051469  | 0.306403168  | 4.866845039  | 1.629625492 | 0.201754856 | 0.999071534 | Zfp191        | Zfp24         | ZNF24    | 29.26507399 | 27.98490096 | 24.23527932 | 28.72419211 | 24.46055804 | 38.27289696 | 45.75371249 | 23.14262155 | 23.64916518 | 25.94750891 |
| ENSMUSG00000046311  | 0.315450623  | 5.14919384   | 1.629017638 | 0.201838977 | 0.999071534 | Zfp62         | Zfp62         | ZFP62    | 22.8085109  | 35.04041624 | 29.28429585 | 33.09526482 | 43.29649578 | 37.54527535 | 30.7397644  | 52.01908665 | 28.91326508 | 39.4114556  |
| ENSMUSG000000061306 | -0.320434633 | 6.550401396  | 1.628878321 | 0.201858263 | 0.999071534 | Slc38a10      | Slc38a10      | SLC38A10 | 127.1662208 | 133.9362103 | 83.34243278 | 82.6340889  | 115.2393135 | 140.7220204 | 98.49667668 | 60.44714584 | 46.04123189 | 72.02557888 |
| ENSMUSG00000044957  | 0.940125871  | 0.920619218  | 1.628609724 | 0.201895451 | 0.999071534 | Pp2d1         | Pp2d1         | PP2D1    | 0.631620302 | 0.415030311 | 0.673202203 | 3.122194795 | 1.373453794 | 0.582097292 | 0.906014109 | 1.72706131  | 4.792687961 | 2.352922722 |
| ENSMUSG00000028102  | -0.304867821 | 4.676865694  | 1.627046749 | 0.202112012 | 0.999071534 | Pex11b        | Pex11b        | PEX11B   | 33.61623607 | 26.44335981 | 33.25618885 | 20.74524986 | 32.63587824 | 29.83248622 | 25.36839504 | 23.90252853 | 13.90665195 | 18.95409971 |
| ENSMUSG00000021432  | 0.30615093   | 4.829880825  | 1.627011989 | 0.202116831 | 0.999071534 | Slc35b3       | Slc35b3       | SLC35B3  | 27.72111325 | 24.36820825 | 29.28429585 | 26.15705417 | 23.74112986 | 23.72046466 | 39.02332197 | 29.36004227 | 26.55620542 | 30.45727746 |
| ENSMUSG00000040284  | -0.800363521 | 7.861286803  | 1.625697312 | 0.202299205 | 0.999071534 | Gzmg          | Gzmg          | GZMH     | 630.1465212 | 558.5715084 | 123.1960032 | 174.2878517 | 60.03955155 | 51.15179955 | 26.53327033 | 381.7496319 | 137.0237345 | 188.6913305 |
| ENSMUSG00000038976  | -0.340626815 | 6.207339514  | 1.623160507 | 0.202651663 | 0.999071534 | Ppp1r9b       | Ppp1r9b       | PPP1R9B  | 89.47954277 | 108.7379414 | 69.94570894 | 56.40765262 | 106.2791626 | 124.787107  | 49.44248422 | 67.07906127 | 34.57020824 | 52.94076125 |
| ENSMUSG00000026782  | 0.313701458  | 5.317542531  | 1.622407438 | 0.202756431 | 0.999071534 | Abi2          | Abi2          | ABI2     | 25.26481208 | 39.90219989 | 43.42154212 | 28.03037105 | 47.87467509 | 42.71138881 | 33.00479967 | 50.22294289 | 43.05562299 | 40.71863489 |
| ENSMUSG000000061882 | 0.614138954  | 2.217864554  | 1.621925616 | 0.202823497 | 0.999071534 | Ccdc62        | Ccdc62        | CCDC62   | 3.298461576 | 2.075151554 | 5.318297407 | 5.273040098 | 2.419894779 | 3.128772945 | 2.912188207 | 8.428059192 | 4.478413341 | 6.862691273 |
| ENSMUSG00000042978  | -0.569941615 | 2.255515447  | 1.621826275 | 0.202837327 | 0.999071534 | Sbk1          | Sbk1          | SBK1     | 5.123142449 | 6.344034752 | 5.85685917  | 5.550568524 | 5.886230544 | 8.294886414 | 2.653327033 | 4.144947144 | 2.435628308 | 1.372538255 |
| ENSMUSG00000041035  | -0.354772576 | 4.623099097  | 1.621775341 | 0.202844419 | 0.999071534 | Dpcd          | Gm17018       | DPCD     | 41.47639982 | 19.86216488 | 29.89017783 | 28.30789947 | 23.28331193 | 35.07136185 | 19.54401863 | 12.43484143 | 16.34228026 | 23.2024324  |
| ENSMUSG00000068457  | 1.260465207  | 1.611128721  | 1.620990048 | 0.202953795 | 0.999071534 | Uty           | Uty           | UTY      | 0.491260235 | 0           | 4.645095204 | 3.469105327 | 0.261610246 | 1.964578361 | 0.517722348 | 0.621742072 | 11.70672961 | 3.071871332 |
| ENSMUSG000000506055 | 0.639640294  | 3.593571392  | 1.620716473 | 0.202991915 | 0.999071534 | Sag           | Sag           | SAG      | 7.439083555 | 4.506043375 | 13.32940363 | 17.13738032 | 5.297607489 | 8.294886414 | 4.788931717 | 7.668152216 | 21.13496822 | 24.90176548 |
| ENSMUSG00000058248  | 0.647228217  | 2.191440381  | 1.620649567 | 0.203001239 | 0.999071534 | Kcnh1         | Kcnh1         | KCNH1    | 5.333682549 | 4.03172302  | 2.490848153 | 0.555056852 | 5.820827982 | 7.494502637 | 6.536244641 | 4.90485412  | 2.435628308 | 5.555511983 |
| ENSMUSG000000085148 | 0.34595089   | 5.222831694  | 1.620297578 | 0.2030503   | 0.999071534 | Mir22hg       | Mir22hg       |          | 39.30081878 | 25.13897883 | 46.58559248 | 28.30789947 | 30.93541163 | 31.50601594 | 30.48090323 | 38.61709089 | 49.96966464 | 44.05194208 |
| ENSMUSG000000091985 | 0.77144308   | 0.892712855  | 1.619386331 | 0.203177376 | 0.999071534 | Gm17354       | Gm17354       |          | 0.771980369 | 0.830060622 | 2.625488593 | 1.526406344 | 0.850233301 | 2.328389169 | 1.035444696 | 2.279720929 | 3.299883514 | 1.30717929  |
| ENSMUSG00000035595  | 0.38610432   | 4.202811107  | 1.619265499 | 0.203194234 | 0.999071534 | 1600002K03Rik | 1600002K03Rik | C19orf24 | 16.70284798 | 14.94109119 | 13.53136429 | 19.70451826 | 17.13547114 | 13.09718907 | 22.13263037 | 15.05997462 | 25.69195022 | 20.39199693 |

|                     |              |              |             |             |             |               |               |             |             |             |             |             |             |             |             |             |             |             |
|---------------------|--------------|--------------|-------------|-------------|-------------|---------------|---------------|-------------|-------------|-------------|-------------|-------------|-------------|-------------|-------------|-------------|-------------|-------------|
| ENSMUSG00000015568  | 0.699319783  | 3.137927693  | 1.618737928 | 0.203267855 | 0.999071534 | Lpl           | Lpl           | LPL         | 14.45708691 | 5.336103997 | 6.395420932 | 1.387642131 | 7.259684337 | 14.84348095 | 24.13880447 | 7.460904859 | 4.16413872  | 3.137230296 |
| ENSMUSG00000029505  | 0.289218318  | 5.934049598  | 1.617786079 | 0.203400764 | 0.999071534 | Ep400         | Ep400         | EP400       | 47.30134261 | 58.69714396 | 59.84767588 | 59.18293689 | 59.51633105 | 79.96561551 | 41.676649   | 63.21044394 | 68.43329859 | 68.56155377 |
| ENSMUSG00000019518  | 0.415395212  | 4.836191237  | 1.616907488 | 0.203523534 | 0.999071534 | Ap4m1         | Ap4m1         | AP4M1       | 27.08949295 | 26.14690958 | 28.67841387 | 17.13738032 | 28.05769892 | 17.9722539  | 14.81980221 | 40.75864691 | 31.663168   | 46.79701859 |
| ENSMUSG00000021549  | 0.26968163   | 6.311543647  | 1.616448706 | 0.203587677 | 0.999071534 | Rasa1         | Rasa1         | RASA1       | 64.07437062 | 67.41278049 | 77.68753427 | 71.04727711 | 93.26405284 | 105.868945  | 81.21769332 | 68.73704013 | 78.72579241 | 84.77057696 |
| ENSMUSG00000033429  | 0.401233492  | 4.081395954  | 1.615560159 | 0.203711973 | 0.999071534 | Mcee          | Mcee          | MCEE        | 12.3516859  | 10.13859759 | 18.24377971 | 19.28822562 | 14.6501738  | 10.76879991 | 21.42076214 | 20.03391119 | 15.3994564  | 22.87563758 |
| ENSMUSG00000065954  | -0.331594299 | 5.109892218  | 1.614607013 | 0.203845405 | 0.999071534 | Tacc1         | Tacc1         | TACC1       | 37.89721811 | 57.80779933 | 32.98690797 | 28.23851737 | 43.10028809 | 55.80857789 | 30.35147264 | 25.76775474 | 18.85647722 | 22.15668897 |
| ENSMUSG00000041921  | 0.467774702  | 3.084937394  | 1.61347127  | 0.204004534 | 0.999071534 | Metap1d       | Metap1d       | METAP1D     | 6.807463254 | 5.573264174 | 8.953589305 | 8.256470679 | 6.671061283 | 6.69411886  | 6.665675228 | 9.53337843  | 8.878258026 | 14.11753633 |
| ENSMUSG00000046447  | -0.581807856 | 3.868228176  | 1.613382707 | 0.204016949 | 0.999071534 | Camk2n1       | Camk2n1       | CAMK2N1     | 11.0884453  | 24.60536843 | 25.78364439 | 18.59440456 | 9.483371431 | 4.584016176 | 4.335924663 | 21.6228076  | 7.621159544 | 16.33974113 |
| ENSMUSG00000025962  | 0.445313732  | 4.644110076  | 1.613096504 | 0.204057075 | 0.999071534 | Fastkd2       | Fastkd2       | FASTKD2     | 29.89669429 | 27.33271047 | 18.04181905 | 15.33344555 | 19.35915823 | 33.39783214 | 58.76148648 | 15.05997462 | 11.07818037 | 24.37889376 |
| ENSMUSG00000039187  | 0.628431688  | 2.46311241   | 1.612879296 | 0.204087534 | 0.999071534 | Fanci         | Fanci         | FANCI       | 7.158363421 | 4.624623464 | 2.288887492 | 4.440454819 | 3.466335765 | 14.62519447 | 9.448432848 | 2.970545453 | 4.00700141  | 2.352922722 |
| ENSMUSG00000070427  | -0.519064771 | 2.585611713  | 1.611532624 | 0.204276496 | 0.999071534 | Il18bp        | Il18bp        | IL18BP      | 7.158363421 | 10.96865822 | 4.645095204 | 7.423885401 | 5.624620297 | 4.147443207 | 2.9769035   | 6.908245239 | 4.635550651 | 4.182973728 |
| ENSMUSG00000094595  | 0.824873787  | 0.824225229  | 1.611373624 | 0.20429882  | 0.999071534 | Fsbp          | Fsbp          | FSBP        | 2.035220973 | 1.185800888 | 1.817645949 | 0.416292639 | 0.784830739 | 1.091432423 | 1.553167044 | 0.828989429 | 3.771295445 | 2.352922722 |
| ENSMUSG00000026483  | -0.334342253 | 4.57788334   | 1.610073654 | 0.204481449 | 0.999071534 | Fam129a       | Fam129a       | FAM129A     | 25.75607231 | 40.55439037 | 18.17645949 | 23.17362359 | 30.28138602 | 29.83248622 | 16.17882337 | 18.8595095  | 16.81369219 | 21.1763045  |
| ENSMUSG00000023043  | 0.375264604  | 6.857608721  | 1.608959097 | 0.204638183 | 0.999071534 | Krt18         | Krt18         | KRT18       | 66.3201317  | 93.61898012 | 120.0319529 | 138.1397741 | 101.5047756 | 111.0350585 | 81.15297802 | 188.3878477 | 128.7740257 | 108.4305221 |
| ENSMUSG00000030929  | 0.421072428  | 3.657806038  | 1.608917614 | 0.204644019 | 0.999071534 | Eri2          | Eri2          | ERI2        | 11.9306057  | 9.782857327 | 12.31960032 | 8.950291745 | 12.62269439 | 20.2278809  | 21.29133155 | 7.668152216 | 12.41384751 | 8.431306421 |
| ENSMUSG00000039616  | -0.470788971 | 3.267502136  | 1.608699695 | 0.204674681 | 0.999071534 | Mocos         | Mocos         | MOCOS       | 17.82572852 | 12.98451973 | 8.482347763 | 9.019673851 | 9.221761185 | 10.84156207 | 8.73656462  | 5.733843549 | 3.064177549 | 11.30710086 |
| ENSMUSG00000064281  | -0.556935795 | 2.781222906  | 1.60846568  | 0.204707614 | 0.999071534 | Rpl19-ps1     | Rpl19-ps1     |             | 9.263764428 | 13.10309981 | 8.078426441 | 3.746633754 | 7.78290483  | 3.056010784 | 10.09558578 | 4.90485412  | 3.064177549 | 5.032640267 |
| ENSMUSG00000060380  | -0.718000802 | 1.091039226  | 1.608209052 | 0.204743737 | 0.999071534 | C030014I23Rik | C030014I23Rik |             | 0.98252047  | 3.023792265 | 3.90457278  | 2.775284262 | 2.092881971 | 2.255627007 | 1.68259763  | 1.588896405 | 0.31427462  | 1.699333077 |
| ENSMUSG00000022946  | -0.499263271 | 3.156015222  | 1.607541994 | 0.204837667 | 0.999071534 | Dopey2        | Dopey2        | DOPEY2      | 7.860163757 | 11.44297857 | 8.415027543 | 13.46012867 | 11.96866877 | 8.731459383 | 5.436084652 | 8.013564478 | 2.199922343 | 11.69925465 |
| ENSMUSG00000058056  | -0.583604632 | 5.221019276  | 1.607395143 | 0.204858352 | 0.999071534 | Palld         | Palld         | PALLD       | 44.3537812  | 99.42940447 | 18.58038081 | 21.71659935 | 49.77134937 | 79.01970741 | 28.34529854 | 27.2875687  | 7.385453579 | 14.57504908 |
| ENSMUSG00000008333  | 0.307802886  | 6.52037264   | 1.607017538 | 0.204911552 | 0.999071534 | Snrpb2        | Snrpb2        | SNRPB2      | 79.0928978  | 73.10462475 | 98.89340368 | 90.95994169 | 82.0802148  | 87.09630734 | 118.6231329 | 75.57620292 | 111.3317843 | 86.535269   |
| ENSMUSG00000004233  | 0.505467464  | 2.58423264   | 1.606026416 | 0.205051266 | 0.999071534 | Wars2         | Wars2         | WARS2       | 5.75476275  | 6.759065062 | 4.712415424 | 3.052812688 | 5.035997243 | 8.804221544 | 5.824376413 | 6.700997882 | 8.092571475 | 3.529384083 |
| ENSMUSG000000081740 | -1.290798051 | 0.275050705  | 1.605179749 | 0.205170707 | 0.999071534 | Gm14279       | Gm14279       |             | 2.38612114  | 0.474320355 | 3.837252559 | 0.20814632  | 1.111843547 | 0           | 0.582437641 | 1.243484143 | 0.942823861 | 0           |
| ENSMUSG00000019471  | -0.308513432 | 6.991700057  | 1.605012659 | 0.205194288 | 0.999071534 | Cdc37         | Cdc37         | CDC37       | 178.1871052 | 139.6873446 | 136.256126  | 139.8049447 | 136.952964  | 179.5042525 | 127.4891282 | 99.75506126 | 60.34072712 | 100.5874464 |
| ENSMUSG00000063383  | 0.493582546  | 2.473698591  | 1.60321792  | 0.20544778  | 0.999071534 | Zfp947        | Zfp947        |             | 4.491522147 | 4.150303108 | 3.231370576 | 4.926129565 | 6.605658721 | 5.74821076  | 7.765835218 | 4.835771668 | 4.242707375 | 8.104511599 |
| ENSMUSG00000073676  | 0.38868509   | 8.397270078  | 1.603037407 | 0.205473297 | 0.999071534 | Hspe1         | Hspe1         | HSPE1       | 406.0616741 | 246.943035  | 269.8867634 | 295.2902455 | 298.7589014 | 278.1697435 | 663.4611888 | 276.8824692 | 279.4687062 | 335.8143596 |
| ENSMUSG00000097403  | 0.914732901  | 0.081827662  | 1.60265242  | 0.205527729 | 0.999071534 | 9230116N13Rik | 9230116N13Rik |             | 0.771980369 | 0.652190488 | 0.673202203 | 0.20814632  | 1.046440986 | 0.509335131 | 1.48845175  | 1.72706131  | 0.392843275 | 1.699333077 |
| ENSMUSG00000026003  | 0.295581664  | 6.46036178   | 1.602447318 | 0.205556735 | 0.999071534 | Acadl         | Acadl         | ACADL       | 73.19777498 | 78.14427853 | 83.94831477 | 70.70036657 | 104.7749037 | 83.82201007 | 78.17607452 | 111.0845834 | 96.63944577 | 89.08426862 |
| ENSMUSG00000005949  | -0.406994199 | 3.624384059  | 1.60231712  | 0.20557515  | 0.999071534 | Ctns          | Ctns          | CTNS        | 11.64988557 | 15.29683146 | 11.5790779  | 17.27614453 | 16.15443271 | 11.71470801 | 9.319002261 | 16.16529386 | 6.521198373 | 7.25484506  |
| ENSMUSG00000061272  | -0.568660105 | 3.344683691  | 1.601905828 | 0.205633336 | 0.999071534 | Gm14173       | Gm14173       |             | 16.35194782 | 26.20619963 | 8.280387102 | 6.313771696 | 5.428412612 | 6.039259406 | 5.241938772 | 7.806317121 | 10.99961171 | 7.320204025 |
| ENSMUSG000000047045 | -0.340366205 | 5.599077295  | 1.601609694 | 0.205675243 | 0.999071534 | Tmem164       | Tmem164       | TMEM164     | 66.67103186 | 66.34555969 | 48.67251931 | 42.73937763 | 57.29264396 | 86.65973437 | 45.94785837 | 29.56728962 | 19.40645781 | 36.20886634 |
| ENSMUSG00000034040  | 1.166435161  | -0.120235333 | 1.601543345 | 0.205684633 | 0.999071534 | Wbscr17       | Wbscr17       | WBSCR17     | 0.140360067 | 0.118580089 | 0.538561763 | 1.526406344 | 0.196207685 | 0.436572969 | 0.711868228 | 0.552659619 | 2.671334273 | 0.588230681 |
| ENSMUSG00000010290  | 0.317136341  | 4.435218908  | 1.600961563 | 0.205766996 | 0.999071534 | Al597479      | Al597479      | C2orf49     | 19.93112953 | 19.20997439 | 16.83005509 | 19.01069719 | 24.5259606  | 19.93683226 | 23.10335977 | 21.89913741 | 24.43485174 | 23.59458619 |
| ENSMUSG00000030177  | 0.463293493  | 2.818513867  | 1.600944394 | 0.205769428 | 0.999071534 | Ccdc77        | Ccdc77        | CCDC77      | 5.614402683 | 3.320242487 | 7.472544458 | 6.383153803 | 7.39048946  | 8.876983706 | 6.277383467 | 7.875399573 | 6.756904338 | 8.954178137 |
| ENSMUSG00000041420  | -0.484489168 | 2.97131094   | 1.600636905 | 0.205812975 | 0.999071534 | Meis3         | Meis3         | MEI3        | 7.439083555 | 8.182026128 | 11.51175768 | 9.85225913  | 9.548773993 | 6.403070214 | 2.912188207 | 8.566224097 | 4.478413341 | 8.627383315 |
| ENSMUSG00000022718  | 0.296361073  | 5.098772399  | 1.598749617 | 0.206080498 | 0.999071534 | Dgcr8         | Dgcr8         | DGCR8       | 33.33551593 | 28.28135118 | 28.81305431 | 32.8177364  | 35.77520119 | 50.42417793 | 33.39309144 | 22.38271458 | 36.69156193 | 39.60753249 |
| ENSMUSG00000027777  | 0.277243028  | 4.849109493  | 1.598740861 | 0.20608174  | 0.999071534 | Schip1        | Schip1        | IQCJ-SCHIP1 | 28.91417382 | 24.19033812 | 31.37122268 | 21.2309246  | 29.36575016 | 37.39975102 | 32.94008438 | 26.38949681 | 23.88487115 | 32.41804639 |
| ENSMUSG00000029387  | 0.344711875  | 3.986443562  | 1.597830832 | 0.206210885 | 0.999071534 | Gtf2h3        | Gtf2h3        | GTF2H3      | 16.07122768 | 17.01624274 | 11.71371834 | 9.64411281  | 17.92030188 | 22.70179439 | 16.95540689 | 18.09960253 | 11.94243557 | 16.47045906 |
| ENSMUSG00000079227  | -0.391749094 | 5.141410325  | 1.597715334 | 0.206227282 | 0.999071534 | Ccr5          | Ccr5          | CCR2        | 49.82782381 | 58.28211365 | 31.57318334 | 27.26716787 | 41.59602918 | 63.44860485 | 35.26983495 | 25.62958984 | 13.67094599 | 17.45084352 |

|                      |              |              |             |             |             |               |          |          |             |             |             |             |             |             |             |             |             |             |
|----------------------|--------------|--------------|-------------|-------------|-------------|---------------|----------|----------|-------------|-------------|-------------|-------------|-------------|-------------|-------------|-------------|-------------|-------------|
| ENSMUSG00000038102   | 0.28985277   | 4.929910435  | 1.59667067  | 0.206375664 | 0.999071534 | Trappc11      | Trappc11 | TRAPPC11 | 29.47561409 | 33.26171491 | 27.39932968 | 19.21884351 | 33.22450129 | 41.18338342 | 27.69814561 | 31.57068074 | 22.54920401 | 40.3264811  |
| ENSMUSG000000027597  | 0.56376242   | 3.499763473  | 1.595901343 | 0.206485019 | 0.999071534 | Ahcy          | Ahcy     | AHCY     | 5.614402683 | 4.506043375 | 20.86926831 | 8.395234892 | 7.259684337 | 7.931075606 | 8.348272859 | 18.44501479 | 15.32088774 | 11.89533154 |
| ENSMUSG000000041827  | -0.650005767 | 2.565775329  | 1.595821131 | 0.206496424 | 0.999071534 | Oasl1         | Oasl1    | OASL     | 8.351423991 | 12.80664959 | 4.847055865 | 5.064893778 | 5.75542542  | 12.2968053  | 4.141778783 | 4.352194501 | 0.942823861 | 1.960768935 |
| ENSMUSG000000049038  | 0.468628271  | 2.706266509  | 1.594049626 | 0.206748508 | 0.999071534 | Mterfd3       | Mterf2   | MTERF2   | 5.75476275  | 5.217523908 | 4.577774983 | 6.244389589 | 6.017035667 | 4.875064822 | 7.183397576 | 7.322739954 | 6.521198373 | 9.28097296  |
| ENSMUSG000000081051  | -0.334315366 | 9.503644774  | 1.594048446 | 0.206748676 | 0.999071534 | Gm15427       | Gm15427  |          | 902.2345112 | 933.4031691 | 717.4135882 | 776.4551544 | 879.6644535 | 717.9442477 | 733.2889904 | 680.6694034 | 320.4815441 | 702.6742274 |
| ENSMUSG000000028111  | 1.17016111   | 7.592976581  | 1.59367052  | 0.206802502 | 0.999071534 | Ctsk          | Ctsk     | CTSK     | 461.7846207 | 28.28135118 | 54.05813693 | 18.73316877 | 66.38360002 | 201.7694739 | 1078.156789 | 14.3691501  | 14.77090716 | 31.96053364 |
| ENSMUSG000000025964  | 1.527612916  | -0.730979985 | 1.593172192 | 0.206873501 | 0.999071534 | Adam23        | Adam23   | ADAM23   | 0.421080201 | 0.474320355 | 0.06732022  | 0           | 0.261610246 | 1.45524323  | 1.747312924 | 0           | 0           | 0.392153787 |
| ENSMUSG000000040703  | 1.341911426  | 0.668311456  | 1.592987612 | 0.206899806 | 0.999071534 | Cyp2s1        | Cyp2s1   | CYP2S1   | 2.17558104  | 0.118580089 | 1.346404407 | 0           | 0.654025616 | 4.001918884 | 6.018522294 | 0.414494714 | 0           | 0.392153787 |
| ENSMUSG000000032537  | -0.510067008 | 2.526941519  | 1.592550605 | 0.206962102 | 0.999071534 | Ephb1         | Ephb1    | EPHB1    | 4.702062247 | 7.055515284 | 6.664701814 | 10.6154623  | 4.90519212  | 5.529924276 | 4.141778783 | 2.832380548 | 4.635550651 | 5.22871716  |
| ENSMUSG000000046295  | 0.522883653  | 2.650722977  | 1.59215309  | 0.207018787 | 0.999071534 | Ankle1        | Ankle1   | ANKLE1   | 7.158363421 | 2.845922132 | 3.971893    | 4.579219032 | 7.78290483  | 10.47775126 | 6.665675228 | 3.385040167 | 7.542590889 | 7.189486096 |
| ENSMUSG000000042460  | 0.271451304  | 5.541843412  | 1.591209021 | 0.207153483 | 0.999071534 | C1galt1       | C1galt1  | C1GALT1  | 45.54684177 | 43.99321295 | 44.56598587 | 42.66999553 | 41.7268343  | 66.57737779 | 66.5273217  | 41.58763634 | 37.32011117 | 36.92781495 |
| ENSMUSG000000060063  | -0.446892931 | 5.466952391  | 1.591009517 | 0.207181961 | 0.999071534 | Alox5ap       | Alox5ap  | ALOX5AP  | 84.98802062 | 48.61783641 | 42.88298036 | 71.81048028 | 50.29456987 | 78.00103715 | 66.98032875 | 34.5412262  | 9.899650542 | 27.38540613 |
| ENSMUSG000000029687  | 0.327411973  | 5.526884903  | 1.590565087 | 0.207245417 | 0.999071534 | Ezh2          | Ezh2     | EZH2     | 50.45944412 | 32.55023438 | 45.03722741 | 44.61269451 | 38.71831646 | 72.03453991 | 60.89709116 | 28.94554755 | 52.87670488 | 33.46378983 |
| ENSMUSG000000041530  | -0.351332927 | 4.601333208  | 1.590249143 | 0.207290542 | 0.999071534 | Ago1          | Ago1     | AGO1     | 26.24733254 | 39.72432975 | 25.31240285 | 19.28822562 | 30.67380139 | 39.00051858 | 18.57328923 | 19.55033403 | 10.8424744  | 19.01945867 |
| ENSMUSG000000037361  | 0.33993187   | 5.936142226  | 1.589578753 | 0.207386329 | 0.999071534 | 0610009D07Rik | Sf3b6    | SF3B6    | 74.39083555 | 43.04457224 | 54.5966987  | 59.80737585 | 47.80927253 | 70.79758316 | 115.1285071 | 41.9330486  | 46.59121247 | 58.10411944 |
| ENSMUSG000000083076  | 1.21030719   | 0.104711558  | 1.589439021 | 0.2074063   | 0.999071534 | Gm11408       | Gm11408  |          | 0.280720134 | 0.059290044 | 1.009803305 | 1.318260024 | 0.327012808 | 0.218286485 | 0.258861174 | 0.552659619 | 3.69272679  | 1.111102397 |
| ENSMUSG000000047242  | -0.760937158 | 0.980665782  | 1.588344538 | 0.207562813 | 0.999071534 | Taf9b         | Taf9b    | TAF9B    | 2.947561409 | 1.956571465 | 2.221567271 | 2.914048475 | 1.896674286 | 2.764962138 | 1.876743511 | 1.036236786 | 0.078568655 | 1.241820326 |
| ENSMUSG0000000028943 | -0.836464875 | 0.269278428  | 1.585833326 | 0.207922447 | 0.999071534 | Espn          | Espn     | ESPN     | 0.98252047  | 1.956571465 | 1.211763966 | 1.734552664 | 1.177246109 | 0.9459081   | 0.258861174 | 1.243484143 | 0.31427462  | 0.980384468 |
| ENSMUSG000000026839  | 0.584773112  | 2.106415265  | 1.585684781 | 0.207943743 | 0.999071534 | Upp2          | Upp2     | UPP2     | 4.491522147 | 2.845922132 | 3.298690797 | 3.399723221 | 3.335530641 | 2.037340523 | 3.494625848 | 4.62852431  | 5.971217787 | 7.058768167 |
| ENSMUSG0000000027132 | 0.285916142  | 5.274331014  | 1.585448623 | 0.207977606 | 0.999071534 | Katnb1        | Katnb1   | KATNB1   | 33.8969562  | 42.80741206 | 35.67971678 | 31.15256584 | 37.21405755 | 37.32698886 | 58.63205589 | 39.65332767 | 31.11318742 | 37.3853277  |
| ENSMUSG000000033793  | 0.27784719   | 6.54082955   | 1.585186863 | 0.208015147 | 0.999071534 | Atp6v1h       | Atp6v1h  | ATP6V1H  | 81.54919898 | 83.7175427  | 88.59340997 | 93.66584384 | 87.90104278 | 86.95078302 | 111.3103048 | 106.7323889 | 90.66822798 | 89.93393516 |
| ENSMUSG000000040321  | 0.366469079  | 3.745585301  | 1.584933688 | 0.208051464 | 0.999071534 | Zfp770        | Zfp770   | ZNF770   | 15.86068758 | 10.25717768 | 11.71371834 | 11.23990126 | 11.24924059 | 18.99092416 | 18.50857394 | 9.602460883 | 13.04239675 | 12.61428015 |
| ENSMUSG000000018931  | -0.462517215 | 3.416219478  | 1.584305225 | 0.208141649 | 0.999071534 | Gm16515       | Natd1    | NATD1    | 9.474304528 | 21.70015625 | 8.011106221 | 9.227820171 | 15.30419941 | 14.62519447 | 8.348272859 | 10.1551205  | 4.399844685 | 6.797332309 |
| ENSMUSG000000087373  | 1.026667555  | -0.145548337 | 1.582809997 | 0.2083564   | 0.999071534 | Gm15892       | Gm15892  |          | 0.491260235 | 0.059290044 | 0.403921322 | 0.555056852 | 1.177246109 | 0.9459081   | 0.323576467 | 1.105319238 | 1.728510412 | 0.784307574 |
| ENSMUSG000000033499  | 0.447512931  | 7.249469154  | 1.581453657 | 0.20855143  | 0.999071534 | Larp4b        | Larp4b   | LARP4B   | 96.07646592 | 86.74133497 | 182.3704769 | 172.2063885 | 125.2459055 | 130.8991286 | 74.29315691 | 177.74915   | 243.7985368 | 182.5475879 |
| ENSMUSG0000000008683 | 0.374669477  | 9.010458154  | 1.579636518 | 0.208813058 | 0.999071534 | Rps15a        | Rps15a   | RPS15A   | 519.1918881 | 374.3573404 | 468.5487336 | 553.6692103 | 405.9536998 | 345.1109321 | 653.365603  | 544.7842196 | 637.0346555 | 537.2506882 |
| ENSMUSG000000040721  | 0.779298615  | 1.473739555  | 1.578512298 | 0.208975115 | 0.999071534 | Zfhx2         | Zfhx2    | ZFHX2    | 1.403600671 | 0.948640711 | 1.615685288 | 2.22022741  | 3.989556257 | 2.255627007 | 0.647152935 | 5.526596192 | 4.949825271 | 2.0261279   |
| ENSMUSG000000028233  | 0.322230929  | 4.724033652  | 1.578277936 | 0.209008917 | 0.999071534 | Tgs1          | Tgs1     | TGS1     | 17.40464832 | 18.79494408 | 30.09213849 | 29.07110264 | 25.31079134 | 32.08811323 | 23.94465859 | 25.56050739 | 29.93465759 | 28.23507267 |
| ENSMUSG000000032356  | 1.198536702  | -0.101989795 | 1.577803353 | 0.209077387 | 0.999071534 | Rasgrf1       | Rasgrf1  | RASGRF1  | 0.701800335 | 0.474320355 | 0.538561763 | 0           | 0.915635862 | 0.291048646 | 1.100159989 | 0.138164905 | 2.828471584 | 0.653589645 |
| ENSMUSG000000020277  | -0.387299456 | 7.801700132  | 1.576200788 | 0.209308789 | 0.999071534 | Pfkl          | Pfkl     | PFKL     | 261.2100848 | 399.259159  | 189.9103416 | 176.6468433 | 293.4612939 | 169.5358363 | 129.9483093 | 287.9356616 | 132.1524779 | 208.4297378 |
| ENSMUSG000000022723  | 0.542696738  | 2.533754682  | 1.575033347 | 0.209477553 | 0.999071534 | Crybg3        | Crybg3   | CRYBG3   | 6.386383052 | 6.106874574 | 3.90457278  | 1.526406344 | 6.278645913 | 9.750129644 | 5.75966112  | 5.319348834 | 3.457020824 | 9.084896066 |
| ENSMUSG000000023206  | 0.480104866  | 3.22073966   | 1.574842729 | 0.209505123 | 0.999071534 | Il15ra        | Il15ra   | IL15RA   | 11.79024564 | 4.328173242 | 9.357510628 | 7.007592761 | 7.455892022 | 14.69795663 | 16.30825396 | 5.112101477 | 7.149747614 | 9.607767782 |
| ENSMUSG000000049124  | 0.385542188  | 5.611979462  | 1.574342343 | 0.209577519 | 0.999071534 | Gm8186        | Gm8186   | SNRPG    | 60.21446878 | 20.6922255  | 43.55618256 | 55.78321367 | 38.3259011  | 44.23939421 | 72.02812164 | 33.64315432 | 63.48437332 | 46.73165962 |
| ENSMUSG000000040774  | 0.261379173  | 5.691480309  | 1.574225535 | 0.209594423 | 0.999071534 | Cept1         | Cept1    | CEPT1    | 53.96844579 | 48.97357668 | 47.3261149  | 46.6247756  | 46.63202642 | 54.20781033 | 73.06356634 | 48.77221139 | 40.85570065 | 54.83617122 |
| ENSMUSG000000026167  | -0.292668162 | 5.594688676  | 1.573940775 | 0.209635639 | 0.999071534 | Wnt10a        | Wnt10a   | WNT10A   | 56.42474697 | 48.67712646 | 52.77905275 | 55.78321367 | 61.80542071 | 49.47826984 | 32.09878557 | 57.26935303 | 22.86347863 | 50.39176163 |
| ENSMUSG000000032041  | 0.381405393  | 4.19356121   | 1.573910729 | 0.209639989 | 0.999071534 | Tirap         | Tirap    | TIRAP    | 12.98330621 | 12.27303919 | 19.25358302 | 17.76181928 | 19.42456079 | 18.26330254 | 11.907614   | 27.97839322 | 20.8206936  | 18.2351511  |
| ENSMUSG000000039601  | -0.654510464 | 1.516895257  | 1.573533829 | 0.209694557 | 0.999071534 | Rcan2         | Rcan2    | RCAN2    | 2.17558104  | 2.371601776 | 3.231370576 | 3.81601586  | 5.690022859 | 3.492583753 | 3.235764674 | 0.690824524 | 1.414235792 | 1.699333077 |
| ENSMUSG000000067424  | 0.793513597  | 1.07612585   | 1.57330788  | 0.209727279 | 0.999071534 | Zfp563        | Zfp563   |          | 2.105401006 | 3.438822576 | 0.740522424 | 0.624438959 | 0.654025616 | 2.546675653 | 2.459181152 | 0.690824524 | 2.671334273 | 3.660102012 |
| ENSMUSG000000014980  | 0.408511416  | 4.593910482  | 1.572992913 | 0.209772902 | 0.999071534 | Tsen15        | Tsen15   | TSEN15   | 24.77355184 | 20.63293545 | 17.03201575 | 18.31687613 | 26.81505025 | 27.50409706 | 55.97872886 | 17.68510781 | 15.71373102 | 17.18940766 |

|                     |              |              |             |             |             |               |               |          |             |             |             |             |             |             |             |             |             |             |
|---------------------|--------------|--------------|-------------|-------------|-------------|---------------|---------------|----------|-------------|-------------|-------------|-------------|-------------|-------------|-------------|-------------|-------------|-------------|
| ENSMUSG00000031996  | -0.320556611 | 7.530275226  | 1.571519108 | 0.20998654  | 0.999071534 | Aplp2         | Aplp2         | APLP2    | 172.7832426 | 239.6503595 | 216.8384297 | 238.1193897 | 194.0494003 | 265.1453166 | 150.9160644 | 153.2939619 | 116.2816095 | 128.5610832 |
| ENSMUSG00000034685  | -0.315741962 | 4.776088821  | 1.571419894 | 0.21000093  | 0.999071534 | Fam171a2      | Fam171a2      | FAM171A2 | 34.3180364  | 35.57402664 | 32.4483462  | 22.89609516 | 32.43967055 | 34.05269159 | 23.23279036 | 29.15279491 | 11.07818037 | 23.13707343 |
| ENSMUSG000000042726 | -0.284152883 | 5.556542861  | 1.569865311 | 0.210226575 | 0.999071534 | Trafd1        | Trafd1        | TRAFD1   | 64.42527079 | 59.58649463 | 43.48886234 | 50.51017357 | 49.9021545  | 57.40934544 | 29.63960441 | 53.05532344 | 27.34189197 | 40.3264811  |
| ENSMUSG00000030772  | 0.804266152  | 1.955327785  | 1.569175031 | 0.21032686  | 0.999071534 | Dkk3          | Dkk3          | DKK3     | 5.123142449 | 4.091013064 | 0.538561763 | 1.873316877 | 2.616102464 | 8.658697221 | 10.67802342 | 1.588896405 | 0.864255206 | 2.679717545 |
| ENSMUSG00000022136  | 0.300087446  | 6.790411126  | 1.568953136 | 0.210359109 | 0.999071534 | Dnajc3        | Dnajc3        | DNAI3    | 119.165697  | 120.5366603 | 71.62871444 | 89.71106377 | 115.2393135 | 149.0169068 | 156.4815796 | 90.49801264 | 97.8179756  | 100.2606516 |
| ENSMUSG00000034994  | -0.37481482  | 10.82577106  | 1.567787645 | 0.210528592 | 0.999071534 | Eef2          | Eef2          | EEF2     | 2283.658291 | 3288.522313 | 1382.420725 | 1340.878591 | 2425.584802 | 2358.076131 | 1497.835468 | 1673.176997 | 898.5897084 | 1419.008478 |
| ENSMUSG00000002546  | -0.311812663 | 5.272102306  | 1.567671329 | 0.210545516 | 0.999071534 | Golga2        | Golga2        | GOLGA8M  | 37.82703808 | 66.34555969 | 38.10324471 | 31.01380163 | 49.24812888 | 45.54911311 | 28.02172208 | 36.40645241 | 19.09218319 | 40.45719903 |
| ENSMUSG00000032590  | -0.255916155 | 5.597062184  | 1.567297242 | 0.210599954 | 0.999071534 | Apeh          | Apeh          | APEH     | 52.07358489 | 60.77229552 | 45.10454763 | 51.20399463 | 64.0291078  | 55.95410221 | 36.11113376 | 43.93643972 | 31.74173666 | 47.18917237 |
| ENSMUSG00000006784  | 0.87402612   | 0.483419437  | 1.566278506 | 0.210748289 | 0.999071534 | Ttc25         | Ttc25         | TTC25    | 1.263240604 | 0.5336104   | 0.605881983 | 0.763203172 | 1.569661478 | 1.018670261 | 0.647152935 | 0.759906976 | 3.535589479 | 1.503256184 |
| ENSMUSG000000092074 | 0.41114338   | 4.981510714  | 1.565686919 | 0.210834485 | 0.999071534 | Dynlt1a       | Dynlt1a       | DYNLT1   | 40.84477952 | 10.85007813 | 30.02481827 | 29.48739528 | 28.97333479 | 20.88274036 | 44.39469133 | 34.26489639 | 23.64916518 | 48.36563373 |
| ENSMUSG00000036992  | 0.332389698  | 5.111255659  | 1.564300456 | 0.21103666  | 0.999071534 | Nxt1          | Nxt1          | NXT1     | 40.07279915 | 20.04003501 | 32.7162709  | 33.99723221 | 31.26242444 | 41.54719423 | 60.63822999 | 28.32380548 | 26.71334273 | 29.73832885 |
| ENSMUSG00000030830  | -0.363735935 | 4.259576478  | 1.563976877 | 0.211083878 | 0.999071534 | Itgal         | Itgal         | ITGAL    | 21.3347302  | 32.72810451 | 20.33070654 | 17.69243717 | 19.29375567 | 28.59552948 | 9.383717555 | 14.30006765 | 12.80669078 | 17.38548456 |
| ENSMUSG00000034667  | 0.284906781  | 6.729389365  | 1.563600852 | 0.211138764 | 0.999071534 | Xpot          | Xpot          | XPOT     | 98.25204696 | 79.50794955 | 116.6659419 | 88.32342164 | 113.8004572 | 140.2854474 | 115.9698059 | 91.81057923 | 116.2030409 | 95.88160093 |
| ENSMUSG00000002014  | 0.324973127  | 7.159609767  | 1.562882032 | 0.211243734 | 0.999071534 | Ssr4          | Ssr4          | SSR4     | 157.6945354 | 128.5408163 | 124.6770481 | 123.1532391 | 124.9842952 | 103.5405558 | 198.0935133 | 152.39589   | 132.6238898 | 167.2535902 |
| ENSMUSG000000021891 | 0.301590841  | 4.683161167  | 1.562644429 | 0.211278445 | 0.999071534 | Mett6         | Mett6         | METTL6   | 27.01931291 | 21.81873634 | 21.67711095 | 20.81463196 | 27.86149124 | 24.22979979 | 36.36999494 | 23.0735391  | 22.07779298 | 29.80368781 |
| ENSMUSG000000045312 | -0.267585179 | 5.729323374  | 1.561973233 | 0.211376535 | 0.999071534 | Lhfp12        | Lhfp12        | LHFPL2   | 47.51188271 | 80.39730022 | 59.64571522 | 53.28545783 | 59.45092849 | 48.82341038 | 44.78298309 | 52.43358137 | 39.28432755 | 45.75127515 |
| ENSMUSG000000080078 | 1.826477555  | -0.414157776 | 1.561415744 | 0.211458048 | 0.999071534 | Gm15583       | Gm15583       |          | 0.842160403 | 0.5336104   | 0           | 0           | 0           | 4.001918884 | 1.035444696 | 0.27632981  | 0           | 0           |
| ENSMUSG000000085527 | 0.818075208  | 1.608051746  | 1.560981958 | 0.211521501 | 0.999071534 | Gm15535       | Gm15535       |          | 1.684320805 | 1.422961066 | 3.164050356 | 1.873316877 | 2.87771271  | 1.018670261 | 0.323576467 | 5.388431287 | 5.185531236 | 5.032640267 |
| ENSMUSG000000097772 | 0.398025309  | 3.661038551  | 1.560808776 | 0.211546839 | 0.999071534 | 5430416N02Rik | 5430416N02Rik |          | 11.79024564 | 10.61291795 | 14.33920693 | 8.880909638 | 10.52981242 | 11.42365936 | 10.8721693  | 13.0565835  | 18.07079067 | 13.0717929  |
| ENSMUSG000000031157 | -0.301104435 | 5.978348452  | 1.560455755 | 0.211598501 | 0.999071534 | Pqbp1         | Pqbp1         | PQBP1    | 56.77564714 | 59.58649463 | 90.0071346  | 68.13322863 | 85.93896594 | 64.32175079 | 39.21746785 | 56.50944606 | 37.16297386 | 77.58109087 |
| ENSMUSG00000030055  | -0.330583253 | 4.723914901  | 1.560263097 | 0.211626702 | 0.999071534 | Rab43         | Rab43         | RAB43    | 37.82703808 | 36.22621713 | 22.08103227 | 23.45115201 | 33.28990385 | 36.23555644 | 16.24353866 | 23.0735391  | 12.80669078 | 27.58148302 |
| ENSMUSG00000034245  | -0.612506598 | 2.09146071   | 1.560016831 | 0.211662756 | 0.999071534 | Hdac11        | Hdac11        | HDAC11   | 4.140621979 | 8.063446039 | 3.164050356 | 5.203657991 | 5.297607489 | 5.602686437 | 2.265035272 | 4.283112048 | 0.628549241 | 3.725460977 |
| ENSMUSG000000004266 | -0.334864339 | 5.076905246  | 1.559893011 | 0.211680886 | 0.999071534 | Ptpn6         | Ptpn6         | PTPN6    | 54.6000661  | 35.39615651 | 33.32350907 | 33.37279325 | 38.71831646 | 55.15371843 | 31.58106322 | 19.68849893 | 14.14235792 | 30.06512367 |
| ENSMUSG000000020676 | 0.827061096  | 2.164498114  | 1.559422438 | 0.211749806 | 0.999071534 | Ccl11         | Ccl11         | CCL11    | 5.684582717 | 2.845922132 | 3.635291898 | 2.428373729 | 1.700466601 | 7.785551283 | 16.17882337 | 0.828989429 | 0.707117896 | 2.810435474 |
| ENSMUSG000000092274 | 0.543831036  | 9.627323349  | 1.558975558 | 0.211815281 | 0.999071534 | Neat1         | Neat1         |          | 535.614016  | 611.9918384 | 756.2753553 | 724.1410461 | 703.0775372 | 275.5503057 | 274.5869902 | 1245.142122 | 1073.719241 | 1425.348298 |
| ENSMUSG000000055760 | 0.421695592  | 3.920015458  | 1.558129571 | 0.211939297 | 0.999071534 | Gemin6        | Gemin6        | GEMIN6   | 14.45708691 | 10.0200175  | 16.89737531 | 8.950291745 | 16.61225065 | 21.24655116 | 30.09261147 | 9.187966168 | 11.5495923  | 12.35284429 |
| ENSMUSG000000046567 | 0.405099432  | 3.805272921  | 1.557672595 | 0.212006323 | 0.999071534 | 4930430F08Rik | 4930430F08Rik | C12orf29 | 10.31646493 | 12.51019937 | 8.616988204 | 13.87642131 | 16.48144552 | 13.31547556 | 19.60873392 | 19.13583931 | 14.22092657 | 8.823460208 |
| ENSMUSG00000030222  | -0.555618508 | 2.495997317  | 1.556126096 | 0.212233337 | 0.999071534 | Rerg          | Rerg          | REGG     | 6.73728322  | 11.32439848 | 5.183656966 | 6.244389589 | 4.51277675  | 5.675448599 | 4.724216424 | 6.700997882 | 1.178529826 | 3.856178906 |
| ENSMUSG000000020069 | 0.336874539  | 5.110168472  | 1.555523883 | 0.212321815 | 0.999071534 | Hnrnp3        | Hnrnp3        | HNRNP3   | 24.28229161 | 25.85045936 | 33.45814951 | 31.91576901 | 42.25005479 | 31.72430242 | 24.00937388 | 44.21276953 | 43.2127603  | 37.1892508  |
| ENSMUSG000000086455 | -1.077731191 | 0.497913042  | 1.554533372 | 0.212467438 | 0.999071534 | Gm11815       | Gm11815       |          | 3.298461576 | 1.363671021 | 0.740522424 | 1.942698983 | 1.63506404  | 1.236956746 | 0           | 1.174401691 | 0           | 1.699333077 |
| ENSMUSG000000024340 | 1.038503618  | 0.204593322  | 1.554463465 | 0.21247772  | 0.999071534 | Btnl2         | Btnl2         | BTNL2    | 1.122880537 | 0.711480533 | 0.538561763 | 0           | 1.111843547 | 3.638108076 | 1.747312924 | 0.345412262 | 0.392843275 | 1.045743432 |
| ENSMUSG000000025467 | 1.722020546  | -0.268507688 | 1.553393892 | 0.21255489  | 0.999071534 | Prap1         | Prap1         | PRAP1    | 0           | 0.059290044 | 0.06732022  | 0.346910533 | 1.24264867  | 0.072762162 | 0           | 0           | 1.571373102 | 3.33330719  |
| ENSMUSG000000024437 | -0.667788346 | 2.046772301  | 1.553479138 | 0.21262256  | 0.999071534 | Gm8615        | Gm8615        |          | 8.632144126 | 7.707705773 | 1.88496617  | 3.052812688 | 4.381971627 | 5.093351307 | 5.824376413 | 1.657978857 | 1.257098482 | 1.699333077 |
| ENSMUSG000000032425 | 0.39819303   | 4.822533304  | 1.553090531 | 0.212679774 | 0.999071534 | Zfp949        | Zfp949        |          | 24.56301174 | 22.2930567  | 23.89867822 | 29.48739528 | 25.50699902 | 16.66253499 | 17.14955277 | 44.97267651 | 27.42046063 | 44.18266001 |
| ENSMUSG000000031543 | -1.242147146 | -0.394652785 | 1.552853248 | 0.212714718 | 0.999071534 | Ank1          | Ank1          | ANK1     | 1.122880537 | 1.778701332 | 0.336601102 | 0.624438959 | 0.654025616 | 1.45524323  | 0.323576467 | 0.207247357 | 0           | 0           |
| ENSMUSG000000028576 | 0.300270158  | 5.286075548  | 1.552569434 | 0.212756523 | 0.999071534 | Ift74         | Ift74         | IFT74    | 27.58075318 | 32.25378416 | 39.31500868 | 40.03347548 | 41.20361381 | 32.59744836 | 41.15892665 | 44.90359406 | 44.15558417 | 39.47681456 |
| ENSMUSG000000026034 | 0.349070195  | 6.667710397  | 1.552280638 | 0.212799073 | 0.999071534 | Clk1          | Clk1          | CLK1     | 88.14612213 | 83.00606217 | 89.13197173 | 108.5136146 | 93.26405284 | 75.81817231 | 76.36404631 | 161.1693614 | 76.60443872 | 152.4824642 |
| ENSMUSG000000025958 | 0.257954299  | 5.676384361  | 1.552052275 | 0.212832725 | 0.999071534 | Creb1         | Creb1         | CREB1    | 47.16098254 | 42.15522157 | 55.33722112 | 44.4739303  | 52.12584159 | 60.3198319  | 47.50102541 | 59.47999151 | 51.46246909 | 47.77740305 |
| ENSMUSG000000033207 | -1.237754005 | -0.387507097 | 1.551991263 | 0.212841717 | 0.999071534 | Mamdc2        | Mamdc2        | MAMDC2   | 1.052700503 | 1.245090933 | 1.144443746 | 0.971349492 | 0.130805123 | 0.072762162 | 0.064715293 | 0.967154334 | 0           | 0.653589645 |

|                    |              |              |             |             |             |               |               |          |             |             |             |             |             |             |             |             |             |             |
|--------------------|--------------|--------------|-------------|-------------|-------------|---------------|---------------|----------|-------------|-------------|-------------|-------------|-------------|-------------|-------------|-------------|-------------|-------------|
| ENSMUSG00000043687 | -0.527841902 | 2.023642876  | 1.550225744 | 0.213102118 | 0.999071534 | 1190005106Rik | 1190005106Rik | C16orf74 | 5.54422265  | 3.142372354 | 5.318297407 | 5.758714844 | 4.251166504 | 4.29296753  | 2.329750565 | 3.799534882 | 1.807079067 | 3.594743048 |
| ENSMUSG00000044864 | -0.289377114 | 6.16962811   | 1.549652291 | 0.213186779 | 0.999071534 | Ankrd50       | Ankrd50       |          | 71.44327415 | 95.04194118 | 79.57250044 | 75.00205718 | 89.60150939 | 93.42661539 | 37.92316198 | 71.15492597 | 53.81952874 | 59.54201666 |
| ENSMUSG00000029136 | 0.591202131  | 2.106596643  | 1.549599987 | 0.213194503 | 0.999071534 | Rbks          | Rbks          | RBKS     | 3.930081878 | 1.126510844 | 3.43331237  | 4.579219032 | 4.185763942 | 3.710870238 | 5.371369359 | 3.868617334 | 6.521198373 | 3.986896835 |
| ENSMUSG00000019944 | 0.382738595  | 3.745589767  | 1.549219492 | 0.213250702 | 0.999071534 | Rhobtb1       | Rhobtb1       | RHOBTB1  | 11.2989854  | 12.62877946 | 9.76143195  | 9.366584384 | 17.07006858 | 14.33414582 | 9.254286968 | 15.26722198 | 14.61376985 | 18.16979213 |
| ENSMUSG00000053830 | 0.837585673  | 2.341152532  | 1.547886299 | 0.213447752 | 0.999071534 | Gm9923        | Gm9923        |          | 5.193322482 | 2.96450222  | 5.452937848 | 0           | 5.101399804 | 9.459080998 | 7.44225875  | 1.934308667 | 8.01400282  | 3.725460977 |
| ENSMUSG00000094638 | 0.869555694  | 6.03834974   | 1.547557055 | 0.213496448 | 0.999071534 | Gm21972       | Gm21972       | PSMD1    | 5.614402683 | 5.691844263 | 119.8973124 | 64.6641233  | 41.66143174 | 20.88274036 | 17.02012219 | 74.60904859 | 161.3800176 | 98.62667744 |
| ENSMUSG00000037720 | 0.310679787  | 6.857677253  | 1.546880196 | 0.2135966   | 0.999071534 | Tmem33        | Tmem33        | TMEM33   | 119.4464171 | 107.1371102 | 93.10386473 | 96.09421757 | 122.4335953 | 118.9661341 | 198.6112357 | 92.63956866 | 93.65383688 | 116.2735979 |
| ENSMUSG00000033220 | -0.340443226 | 5.167298924  | 1.545973979 | 0.213730776 | 0.999071534 | Rac2          | Rac2          | RAC2     | 55.58258657 | 32.07591402 | 42.54637926 | 38.78459756 | 38.97992671 | 54.2805725  | 43.74753839 | 18.79042705 | 17.91365336 | 23.98673997 |
| ENSMUSG00000022037 | -0.349948417 | 7.149171667  | 1.544903052 | 0.213889469 | 0.999071534 | Clu           | Clu           | CLU      | 124.7099196 | 107.1964003 | 204.384189  | 197.2533289 | 187.4437415 | 141.0858312 | 78.04664394 | 118.959983  | 98.60366215 | 166.9921543 |
| ENSMUSG00000026605 | 0.306625162  | 5.473605924  | 1.544889199 | 0.213891522 | 0.999071534 | Cenpf         | Cenpf         | CENPF    | 39.02009865 | 26.85839012 | 45.03722741 | 36.84189858 | 58.33908494 | 68.8330048  | 52.22524184 | 30.81077377 | 43.2127603  | 44.24801897 |
| ENSMUSG00000020682 | -0.585075065 | 2.970783717  | 1.544826738 | 0.213900782 | 0.999071534 | Mmp28         | Mmp28         | MMP28    | 13.68510654 | 17.54985314 | 2.154247051 | 4.787365352 | 10.33360473 | 10.55051342 | 5.241938772 | 5.941090906 | 3.771295445 | 5.22871716  |
| ENSMUSG00000037563 | 0.369031402  | 9.453393253  | 1.543913516 | 0.214036225 | 0.999071534 | Rps16         | Rps16         | RPS16    | 590.4246222 | 557.0299672 | 664.3832546 | 735.7278578 | 616.4845456 | 439.7745042 | 831.5268059 | 800.5965408 | 833.06345   | 783.1311127 |
| ENSMUSG00000025579 | -0.315116231 | 5.78714892   | 1.543864329 | 0.214043523 | 0.999071534 | Gaa           | Gaa           | GAA      | 55.16150636 | 87.9864259  | 52.77905275 | 45.86157243 | 76.91341244 | 59.15563732 | 36.17584905 | 70.39501899 | 28.12757853 | 46.4048648  |
| ENSMUSG00000000782 | -0.421354161 | 3.395606065  | 1.543476051 | 0.214101143 | 0.999071534 | Tcf7          | Tcf7          | TCF7     | 9.755024662 | 12.45090933 | 15.68561134 | 8.603381212 | 15.5004071  | 13.53376204 | 6.795105815 | 7.806317121 | 4.478413341 | 11.63389568 |
| ENSMUSG00000035206 | 0.302300986  | 4.593352561  | 1.543058219 | 0.214163169 | 0.999071534 | Sppl2b        | Sppl2b        | SPPL2B   | 25.05427197 | 19.44713457 | 25.85096461 | 15.74973819 | 26.03021952 | 33.83440511 | 27.05099267 | 20.37932346 | 23.49022787 | 23.98673997 |
| ENSMUSG00000022436 | -0.262372799 | 5.96589107   | 1.5407685   | 0.214503452 | 0.999071534 | Sh3bp1        | Sh3bp1        | SH3BP1   | 70.03967347 | 64.44827827 | 82.80387102 | 56.96270948 | 79.79112515 | 78.07379931 | 43.29453134 | 53.95339532 | 42.81991703 | 59.60737563 |
| ENSMUSG00000028701 | 0.707210354  | 0.953170499  | 1.540139201 | 0.214597087 | 0.999071534 | Lurap1        | Lurap1        | LURAP1   | 2.245761073 | 1.778701332 | 1.144443746 | 0.901967385 | 1.111843547 | 1.746291877 | 0.841298815 | 2.279720929 | 3.064177549 | 2.548999616 |
| ENSMUSG00000050232 | -0.983157934 | -0.050550128 | 1.539997353 | 0.214618199 | 0.999071534 | Cxcr3         | Cxcr3         | CXCR3    | 1.754500839 | 1.304380977 | 0.673202203 | 1.179495811 | 0.784830739 | 0.727621615 | 0.517722348 | 0.27632981  | 0           | 1.241820326 |
| ENSMUSG00000096914 | 1.028725606  | 0.161367474  | 1.539598456 | 0.214677584 | 0.999071534 | Galnt16       | Galnt16       | GALNT16  | 0.210540101 | 0.118580089 | 0.740522424 | 1.457024238 | 0.850233301 | 0.582097292 | 0.388291761 | 1.105319238 | 2.671334273 | 1.30717929  |
| ENSMUSG00000022235 | -0.866456438 | 0.46113144   | 1.53903409  | 0.214761636 | 0.999071534 | Cmb1          | Cmb1          | CMBL     | 0.280720134 | 0.830060622 | 3.366011017 | 2.497755836 | 1.24264867  | 1.018670261 | 0.582437641 | 0.621742072 | 0.942823861 | 1.045743432 |
| ENSMUSG00000062310 | 0.694633909  | 1.752272262  | 1.537641344 | 0.214969228 | 0.999071534 | Glrp1         | Glrp1         | GLRP1    | 1.754500839 | 1.304380977 | 1.95228639  | 5.82809695  | 1.765869163 | 1.746291877 | 2.78275762  | 4.006782239 | 4.635550651 | 5.424794054 |
| ENSMUSG00000015467 | 0.703452954  | 1.528403827  | 1.537581513 | 0.214978151 | 0.999071534 | Egfl8         | Egfl8         | EGFL8    | 1.403600671 | 1.422961066 | 1.95228639  | 4.301690606 | 1.63506404  | 1.8918162   | 1.229590576 | 5.319348834 | 2.828471584 | 4.836563373 |
| ENSMUSG00000049625 | -0.379371897 | 4.238569162  | 1.536314528 | 0.215167215 | 0.999071534 | Tifab         | Tifab         | TIFAB    | 29.61597415 | 24.01246798 | 15.28169002 | 18.38625824 | 23.21790937 | 33.39783214 | 13.20191987 | 9.671543335 | 10.37106247 | 15.81686941 |
| ENSMUSG00000025795 | -0.320100511 | 5.141862786  | 1.536226848 | 0.215180306 | 0.999071534 | Rassf3        | Rassf3        | RASSF3   | 45.12576157 | 46.24623464 | 31.37122268 | 35.66240277 | 44.99696238 | 49.11445903 | 44.13583015 | 25.07693022 | 17.28510412 | 20.58807382 |
| ENSMUSG00000079737 | 0.576313333  | 2.107813809  | 1.536060172 | 0.215205195 | 0.999071534 | 3110001122Rik | 3110001122Rik | PPHLN1   | 3.579181711 | 3.853852886 | 2.625488593 | 1.595788451 | 5.951633105 | 2.473913492 | 5.436084652 | 5.941090906 | 4.242707375 | 5.490153018 |
| ENSMUSG00000027236 | 0.416086347  | 3.427265711  | 1.535787043 | 0.215245986 | 0.999071534 | Eif3j1        | Eif3j1        | EIF3J    | 8.000523824 | 7.707705773 | 10.97319592 | 10.96237283 | 9.41796887  | 13.82481069 | 11.58403753 | 8.635306549 | 15.24231909 | 8.365947457 |
| ENSMUSG00000026353 | 0.34320248   | 7.226989552  | 1.535356586 | 0.215310293 | 0.999071534 | Ubxn4         | Ubxn4         | UBXN4    | 102.533029  | 123.0268421 | 166.3482645 | 130.7852708 | 161.9367425 | 121.4400476 | 121.0823141 | 193.8453614 | 167.7440786 | 183.5933313 |
| ENSMUSG00000091549 | -0.442382655 | 3.087647804  | 1.534600668 | 0.215423278 | 0.999071534 | Gm6548        | Gm6548        |          | 9.895384729 | 11.14652835 | 10.03071283 | 7.770795933 | 11.38004572 | 11.20537287 | 6.989251696 | 6.493750525 | 2.514196963 | 8.431306421 |
| ENSMUSG00000026826 | -0.460121013 | 2.977286407  | 1.53321405  | 0.215630713 | 0.999071534 | Nr4a2         | Nr4a2         | NR4A2    | 12.42186594 | 9.901437416 | 12.18495988 | 6.105625376 | 6.082438228 | 7.421740475 | 4.788931717 | 8.911636359 | 4.32127603  | 6.209101628 |
| ENSMUSG00000064267 | -0.75202371  | 1.909021403  | 1.533077694 | 0.215651125 | 0.999071534 | Hvcn1         | Hvcn1         | HVCN1    | 5.263502516 | 6.46261484  | 7.001302916 | 1.873316877 | 3.073920395 | 9.386318836 | 2.006174098 | 1.312566595 | 0.549980586 | 1.30717929  |
| ENSMUSG00000030861 | -0.299465311 | 5.683390933  | 1.532099583 | 0.215797608 | 0.999071534 | Acad5b        | Acad5b        | ACAD5B   | 54.67024613 | 82.35387168 | 36.0836381  | 53.9792789  | 67.23383332 | 47.29540499 | 55.52572181 | 51.67367439 | 30.01322625 | 38.62714802 |
| ENSMUSG00000022035 | 0.343396603  | 5.499729951  | 1.530446552 | 0.216045438 | 0.999071534 | Ccdc25        | Ccdc25        | CCDC25   | 43.7221609  | 31.60159367 | 50.9614068  | 49.7469704  | 29.23494503 | 55.08095627 | 44.6535525  | 25.9750021  | 59.39790325 | 54.83617122 |
| ENSMUSG00000027550 | 0.293800168  | 4.620591973  | 1.530025514 | 0.216108616 | 0.999071534 | Lrrcc1        | Lrrcc1        | LRRCC1   | 18.87842902 | 23.3602775  | 21.34050985 | 25.393851   | 24.85297341 | 31.79706459 | 22.7797833  | 23.28078646 | 26.79191139 | 24.90176548 |
| ENSMUSG00000090015 | 0.669485773  | 2.268832473  | 1.52930074  | 0.216217422 | 0.999071534 | Gm15446       | Gm15446       | ZNF788   | 8.000523824 | 2.490181865 | 1.750325729 | 4.440454819 | 2.092881971 | 5.602686437 | 12.42533635 | 4.006782239 | 1.571373102 | 4.901922338 |
| ENSMUSG00000026987 | 0.410370396  | 5.058184027  | 1.528414809 | 0.21635051  | 0.999071534 | Baz2b         | Baz2b         | BAZ2B    | 20.70310989 | 24.30891821 | 34.60259326 | 37.95201228 | 29.36575016 | 26.41266463 | 15.72581632 | 41.03497672 | 51.54103774 | 39.99968628 |
| ENSMUSG00000046618 | 0.907643108  | 0.681968876  | 1.527177873 | 0.21653649  | 0.999071534 | Olfm12a       | Olfm12a       | OLFML2A  | 0.280720134 | 0.5336104   | 2.423527932 | 1.526406344 | 0.523220493 | 2.037340523 | 1.229590576 | 0.345412262 | 3.221314859 | 2.222204793 |
| ENSMUSG00000014791 | 0.601622786  | 1.895328817  | 1.526990392 | 0.216564696 | 0.999071534 | Elmo3         | Elmo3         | ELMO3    | 3.579181711 | 1.541541155 | 3.837252559 | 4.162926393 | 1.569661478 | 4.656778337 | 2.135604685 | 5.043019025 | 3.221314859 | 5.882306805 |
| ENSMUSG00000090031 | 0.60980578   | 2.26126483   | 1.526909125 | 0.216576923 | 0.999071534 | 4732440D04Rik | 4732440D04Rik |          | 4.631882214 | 1.719411288 | 3.971893    | 5.411804311 | 3.335530641 | 3.201535107 | 2.329750565 | 5.112101477 | 7.071178959 | 8.431306421 |
| ENSMUSG00000032727 | 0.335185783  | 4.417429905  | 1.526666806 | 0.216613388 | 0.999071534 | Mier3         | Mier3         | MIER3    | 15.43960738 | 16.60121243 | 19.72482456 | 23.52053412 | 21.77905301 | 24.08427546 | 14.81980221 | 25.42234248 | 25.06340098 | 23.2024324  |



|                     |              |              |             |             |             |               |               |          |             |             |             |             |             |             |             |             |             |             |
|---------------------|--------------|--------------|-------------|-------------|-------------|---------------|---------------|----------|-------------|-------------|-------------|-------------|-------------|-------------|-------------|-------------|-------------|-------------|
| ENSMUSG00000056763  | 0.408984186  | 3.985422484  | 1.50397869  | 0.220060189 | 0.999071534 | Cspp1         | Cspp1         | CSPP1    | 11.36916543 | 10.31646773 | 15.61829112 | 16.51294136 | 15.95822503 | 14.04309717 | 11.00159989 | 19.34308667 | 24.59198905 | 14.05217737 |
| ENSMUSG00000038664  | 0.313506132  | 4.947525545  | 1.503968918 | 0.220061688 | 0.999071534 | Herc1         | Herc1         | HERC1    | 26.03679244 | 22.11518656 | 32.24638554 | 32.47082586 | 28.84252966 | 35.79898347 | 19.02629628 | 37.02819448 | 34.09879631 | 36.47030219 |
| ENSMUSG00000025949  | 0.274332411  | 4.814021236  | 1.502838987 | 0.220235054 | 0.999071534 | Pikfyve       | Pikfyve       | PIKFYVE  | 23.4401312  | 27.68845074 | 25.31240285 | 23.65929833 | 31.65483981 | 34.12545375 | 24.39766564 | 30.05086679 | 26.00622484 | 33.3330719  |
| ENSMUSG00000002059  | -0.278088499 | 6.580018355  | 1.502774818 | 0.220244904 | 0.999071534 | Rab34         | Rab34         | RAB34    | 99.02402733 | 129.489457  | 116.2620205 | 96.09421757 | 103.2052422 | 100.2662586 | 80.11753333 | 99.06423673 | 46.51264382 | 97.71165193 |
| ENSMUSG00000028690  | 0.460346873  | 2.460494548  | 1.502669982 | 0.220260998 | 0.999071534 | Mmachc        | Mmachc        | MMACHC   | 4.491522147 | 5.573264174 | 3.971893    | 4.717983245 | 4.708984435 | 5.820972922 | 7.571689337 | 4.352194501 | 5.735511822 | 6.339819557 |
| ENSMUSG00000008540  | 0.475931478  | 3.088579468  | 1.502513723 | 0.220284989 | 0.999071534 | Mgst1         | Mgst1         | MGST1    | 7.93034379  | 6.699775018 | 10.16535327 | 4.717983245 | 6.998074091 | 9.168032352 | 18.12028217 | 8.428059192 | 5.814080477 | 5.882306805 |
| ENSMUSG000000086589 | 1.158079833  | -0.061721491 | 1.502441279 | 0.220296113 | 0.999071534 | Gm12915       | Gm12915       |          | 0           | 0.415030311 | 1.144443746 | 0.555056852 | 0.588623054 | 0.436572969 | 0.129430587 | 1.4507315   | 2.514196963 | 0.653589645 |
| ENSMUSG00000071343  | -0.679501552 | 1.590777909  | 1.501749226 | 0.220402411 | 0.999071534 | Gm10327       | Gm10327       |          | 1.19306057  | 7.114805329 | 3.500651458 | 1.80393477  | 4.839789558 | 2.619437815 | 2.070889391 | 3.661369977 | 1.178529826 | 1.241820326 |
| ENSMUSG000000093752 | 0.27487423   | 6.258904801  | 1.500372714 | 0.220614023 | 0.999071534 | Gm20716       | Gm20716       | DPM1     | 48.28386308 | 74.70545595 | 70.01302916 | 72.50430134 | 93.52566308 | 88.33326409 | 82.90029095 | 84.14242702 | 59.63360922 | 90.84896066 |
| ENSMUSG00000019868  | 0.267449931  | 6.034122555  | 1.498878368 | 0.220844024 | 0.999071534 | Vta1          | Vta1          | VTA1     | 65.47797129 | 58.16353356 | 58.9051928  | 60.4318148  | 65.20635391 | 63.73965349 | 87.68922266 | 68.94428749 | 64.42629718 | 56.27406844 |
| ENSMUSG00000024030  | -0.49781155  | 3.466121632  | 1.498258941 | 0.220939447 | 0.999071534 | Abcg1         | Abcg1         | ABCG1    | 17.26428825 | 23.59743767 | 11.84835878 | 5.689332737 | 8.502333007 | 18.48158903 | 8.801279913 | 7.737234668 | 4.085570065 | 6.993409202 |
| ENSMUSG00000033088  | -0.265157973 | 6.257317149  | 1.497679292 | 0.221028786 | 0.999071534 | Triobp        | Triobp        | TRIOBP   | 100.357448  | 78.73717897 | 78.96661846 | 68.8270497  | 107.8488241 | 100.0479721 | 63.35627232 | 68.59887523 | 43.29132896 | 67.51581033 |
| ENSMUSG00000027878  | -0.267170964 | 6.590592784  | 1.497189081 | 0.221104375 | 0.999071534 | Notch2        | Notch2        | NOTCH2   | 93.33944461 | 128.8372665 | 106.5679088 | 102.6161356 | 114.5852879 | 128.0614043 | 67.43333581 | 80.6883044  | 64.58343449 | 88.95355069 |
| ENSMUSG00000046080  | -0.907963674 | -0.068105685 | 1.496597209 | 0.22119568  | 0.999071534 | Clec9a        | Clec9a        | CLEC9A   | 0.561440268 | 1.600831199 | 1.615685288 | 1.179495811 | 0.523220493 | 1.018670261 | 0.970729402 | 0.345412262 | 0.235705965 | 0.261435858 |
| ENSMUSG000000053644 | -0.382324253 | 3.587123613  | 1.495839843 | 0.221312581 | 0.999071534 | Aldh7a1       | Aldh7a1       | ALDH7A1  | 15.36942735 | 16.36405226 | 10.56927459 | 12.00310443 | 15.76201734 | 16.51701067 | 11.00159989 | 8.428059192 | 4.714119306 | 11.045665   |
| ENSMUSG00000029623  | 0.306554941  | 7.32146681   | 1.495666119 | 0.221339406 | 0.999071534 | Pdap1         | Pdap1         | PDAP1    | 137.9037659 | 116.208487  | 175.8404155 | 144.8004564 | 166.6457269 | 164.6607715 | 175.0548689 | 143.2770063 | 175.6009441 | 182.8090237 |
| ENSMUSG00000032243  | -0.590235242 | 2.098594545  | 1.495364238 | 0.22138603  | 0.999071534 | Itga11        | Itga11        | ITGA11   | 4.421342113 | 9.01208675  | 4.577774983 | 2.705902155 | 5.297607489 | 3.128772945 | 1.68259763  | 6.286503168 | 1.964216377 | 2.875794438 |
| ENSMUSG000000074781 | 0.325776395  | 7.672927807  | 1.495073762 | 0.221430903 | 0.999071534 | Ube2n         | Ube2n         | UBE2N    | 166.6775797 | 143.3040373 | 195.5652401 | 209.5339618 | 222.434112  | 198.640701  | 301.1202606 | 187.2825284 | 187.4648111 | 213.3316601 |
| ENSMUSG000000016477 | 0.322878407  | 4.426018703  | 1.494681309 | 0.221491547 | 0.999071534 | E2f3          | E2f3          | E2F3     | 16.00104765 | 14.70393101 | 25.04312197 | 19.28822562 | 23.41411705 | 34.27097808 | 16.8906916  | 19.27400422 | 22.15636074 | 23.07171447 |
| ENSMUSG000000051557 | 0.348929066  | 3.842930747  | 1.494425318 | 0.221531114 | 0.999071534 | Pus1          | Pus1          | PUSL1    | 16.42212785 | 10.73149804 | 12.72352164 | 11.51742969 | 13.66913537 | 14.91624311 | 11.51932224 | 16.44162367 | 14.45663254 | 18.75802281 |
| ENSMUSG00000042292  | -0.313657682 | 5.144112037  | 1.493902959 | 0.22161188  | 0.999071534 | Mkl1          | Mkl1          | MKL1     | 44.91522147 | 46.0683645  | 41.40193551 | 37.67448386 | 32.7012808  | 58.71906435 | 27.56871502 | 19.27400422 | 18.5422026  | 34.2480974  |
| ENSMUSG000000057672 | -0.310818338 | 5.265291834  | 1.493617512 | 0.22165603  | 0.999071534 | Pkn1          | Pkn1          | PKN1     | 61.75842952 | 55.49548157 | 33.92939105 | 31.01380163 | 39.43774464 | 58.93735083 | 32.29293145 | 32.19242282 | 21.13496822 | 26.40502166 |
| ENSMUSG00000045007  | -1.021654996 | -0.538544889 | 1.491629382 | 0.221963824 | 0.999071534 | Tubg2         | Tubg2         | TUBG2    | 0.280720134 | 0.237160178 | 1.009803305 | 1.318260024 | 0.981038424 | 0.291048646 | 0.258861174 | 0.27632981  | 0.549980586 | 0.326794823 |
| ENSMUSG000000031174 | 0.439906598  | 2.827317416  | 1.490985868 | 0.22206356  | 0.999071534 | Rpgr          | Rpgr          | RPGR     | 4.631882214 | 4.861783641 | 8.415027543 | 6.175007483 | 6.54025616  | 6.839643183 | 9.124856381 | 7.806317121 | 6.914041649 | 7.646998847 |
| ENSMUSG000000027247 | -0.293207201 | 5.522687244  | 1.490962219 | 0.222067226 | 0.999071534 | Arhgap1       | Arhgap1       | ARHGAP1  | 52.98592532 | 59.52720458 | 50.15356415 | 45.86157243 | 54.08791844 | 76.32750744 | 41.41778783 | 32.19242282 | 20.74212495 | 37.58140459 |
| ENSMUSG000000044927 | -0.443292961 | 3.708567462  | 1.490354556 | 0.222161457 | 0.999071534 | H1fx          | H1fx          | H1FX     | 16.07122768 | 5.336103997 | 19.38822346 | 20.60648565 | 15.5004071  | 18.69987551 | 8.089411685 | 7.806317121 | 8.956826681 | 10.71887018 |
| ENSMUSG000000078902 | 0.959062908  | 0.575299796  | 1.489909504 | 0.222230501 | 0.999071534 | Gm14443       | Gm14443       |          | 2.17558104  | 1.304380977 | 0.471241542 | 0           | 0.915635862 | 1.309718907 | 2.200319978 | 0.483577167 | 1.257098482 | 3.398666154 |
| ENSMUSG000000041777 | 0.437753845  | 4.922407658  | 1.489876352 | 0.222235645 | 0.999071534 | Cir1          | Cir1          | CIR1     | 14.94834714 | 22.2930567  | 38.10324471 | 28.65481    | 28.58091942 | 16.80805931 | 16.43768454 | 49.25578856 | 31.42746204 | 48.49635166 |
| ENSMUSG000000033439 | 0.397472119  | 3.515057316  | 1.489745455 | 0.222255958 | 0.999071534 | Trmt13        | Trmt13        | TRMT13   | 7.228543455 | 8.597056439 | 13.73332495 | 12.48877918 | 8.240722761 | 11.42365936 | 11.77818341 | 15.26722198 | 10.37106247 | 12.67963911 |
| ENSMUSG000000052707 | 0.402011791  | 6.73240206   | 1.48902337  | 0.222368051 | 0.999071534 | Tnrc6a        | Tnrc6a        | TNRC6A   | 67.86409243 | 65.75265925 | 136.7946877 | 102.8242819 | 99.804309   | 88.84259922 | 53.13125595 | 118.8218181 | 149.0447387 | 152.6785411 |
| ENSMUSG000000046138 | 0.446413725  | 4.852513268  | 1.488783833 | 0.222405251 | 0.999071534 | 9930021J03Rik | 9930021J03Rik | KIAA2026 | 13.54474647 | 23.30098745 | 34.53527304 | 24.83879414 | 29.88897065 | 21.02826468 | 11.907614   | 38.8934207  | 45.09840803 | 35.62063566 |
| ENSMUSG000000037221 | -0.341187106 | 4.513079143  | 1.488455026 | 0.222456326 | 0.999071534 | Mospd3        | Mospd3        | MOSPD3   | 24.84373187 | 18.26133368 | 33.25618885 | 26.85087523 | 28.25390661 | 17.9722539  | 12.29590576 | 24.24794079 | 16.89226085 | 24.24817583 |
| ENSMUSG000000064037 | 0.306132185  | 5.122294832  | 1.487820692 | 0.2225549   | 0.999071534 | Gpn1          | Gpn1          | GNP1     | 43.58180083 | 27.33271047 | 35.747037   | 28.09975315 | 26.61884257 | 49.04169687 | 53.51954771 | 24.24794079 | 24.35628308 | 37.77748148 |
| ENSMUSG000000049872 | 0.580453619  | 1.895028207  | 1.486983192 | 0.222685125 | 0.999071534 | Fam26e        | Fam26e        | FAM26E   | 3.719541778 | 3.675982753 | 1.346404407 | 2.636520049 | 3.597140888 | 3.274297269 | 6.665675228 | 4.006782239 | 1.807079067 | 5.163358196 |
| ENSMUSG000000029599 | -0.363235899 | 5.711537226  | 1.486743599 | 0.222722397 | 0.999071534 | Ddx54         | Ddx54         | DDX54    | 81.12811877 | 71.62237364 | 52.84637297 | 40.10285759 | 61.67461558 | 104.7775126 | 41.80607959 | 31.15618603 | 19.87786974 | 38.23499424 |
| ENSMUSG000000032103 | 0.399598384  | 3.302677131  | 1.485965141 | 0.222843548 | 0.999071534 | Pus3          | Pus3          | PUS3     | 10.17610486 | 5.929004441 | 7.001302916 | 11.17051915 | 9.156358623 | 10.18670261 | 10.74273872 | 9.740625788 | 9.742513232 | 12.61428015 |
| ENSMUSG000000033554 | 0.360420391  | 4.371792226  | 1.485959752 | 0.222844387 | 0.999071534 | Dph5          | Dph5          | DPH5     | 18.38716879 | 11.50226861 | 25.78364439 | 21.57783514 | 15.82741991 | 28.15895651 | 29.57488912 | 12.15851162 | 19.95643839 | 22.54884275 |
| ENSMUSG000000023940 | 0.388979792  | 4.482859629  | 1.48543532  | 0.222926049 | 0.999071534 | Sgol1         | Sgol1         | SGO1     | 29.12471392 | 12.74735955 | 19.5228639  | 18.66378666 | 20.07858641 | 33.25230782 | 36.95243258 | 9.602460883 | 19.56359512 | 24.3135348  |
| ENSMUSG000000094942 | 0.668160261  | 1.290538505  | 1.484705746 | 0.223039714 | 0.999071534 | Gm3604        | Gm3604        |          | 2.245761073 | 2.193731643 | 1.413724627 | 1.595788451 | 1.896674286 | 2.837724299 | 2.394465859 | 1.519813953 | 5.185531236 | 1.241820326 |

|                     |              |              |             |             |             |               |               |              |             |             |             |             |             |             |             |             |             |             |
|---------------------|--------------|--------------|-------------|-------------|-------------|---------------|---------------|--------------|-------------|-------------|-------------|-------------|-------------|-------------|-------------|-------------|-------------|-------------|
| ENSMUSG00000030104  | -0.288171357 | 6.575941683  | 1.484318447 | 0.223100082 | 0.999071534 | Edem1         | Edem1         | EDEM1        | 120.2885775 | 137.7900632 | 103.9424202 | 91.72314486 | 91.17117086 | 128.0614043 | 103.3503237 | 77.09601687 | 46.51264382 | 72.02557888 |
| ENSMUSG000000021116 | 0.417861434  | 6.832047741  | 1.483371645 | 0.223247741 | 0.999071534 | Elf2s1        | Elf2s1        | EIF2S1       | 129.0610817 | 117.0978377 | 73.64832105 | 81.24644677 | 107.1293959 | 145.8153717 | 282.5469713 | 77.23418178 | 67.0190628  | 69.80337409 |
| ENSMUSG000000025758 | 0.332594253  | 5.281774963  | 1.483334372 | 0.223253557 | 0.999071534 | Plk4          | Plk4          | PLK4         | 45.4064817  | 25.31684896 | 39.98821088 | 29.76492371 | 38.19509597 | 61.99336162 | 60.96180646 | 29.15279491 | 36.61299328 | 23.07171447 |
| ENSMUSG000000028420 | -0.546782422 | 2.238433731  | 1.482991282 | 0.223307094 | 0.999071534 | Tmem38b       | Tmem38b       | TMEM38B      | 6.316203019 | 5.929004441 | 7.472544458 | 5.273040098 | 3.204725518 | 5.74821076  | 6.212668174 | 1.796143762 | 2.278490998 | 2.483640651 |
| ENSMUSG000000074637 | 0.698288471  | 2.458242611  | 1.482816998 | 0.22334296  | 0.999071534 | Sox2          | Sox2          | SOX2         | 1.684320805 | 1.778701332 | 3.433331237 | 7.007592761 | 7.194281776 | 2.037340523 | 2.78275762  | 8.08264693  | 10.37106247 | 6.666614379 |
| ENSMUSG000000037646 | -0.301990951 | 4.147992874  | 1.482737562 | 0.223346696 | 0.999071534 | Vps13b        | Vps13b        | VPS13B       | 19.93112953 | 22.17447661 | 19.25358302 | 21.2309246  | 18.11650956 | 19.57302145 | 14.69037162 | 16.85611838 | 10.44963113 | 15.49007459 |
| ENSMUSG000000024491 | 0.297057146  | 5.063866634  | 1.482581736 | 0.223371022 | 0.999071534 | Rbm27         | Rbm27         | RP11-449H3.3 | 30.52831459 | 27.21413038 | 35.34311568 | 29.00172054 | 33.09369617 | 38.2001348  | 24.13880447 | 33.57407186 | 43.84130954 | 33.92130258 |
| ENSMUSG000000024339 | -0.299864233 | 7.338630061  | 1.48186735  | 0.223482586 | 0.999071534 | Tap2          | Tap2          | TAP2         | 213.7683822 | 155.9328168 | 197.9214478 | 185.7358992 | 172.5319575 | 219.3051548 | 109.4335613 | 122.1377758 | 107.7176261 | 156.1425662 |
| ENSMUSG000000039304 | -0.513111239 | 2.204804795  | 1.480913134 | 0.223631709 | 0.999071534 | Tnfsf10       | Tnfsf10       | TNFSF10      | 5.193322482 | 5.929004441 | 4.106533441 | 6.452535909 | 5.559217736 | 7.64002696  | 3.494625848 | 3.108710358 | 2.121353688 | 2.287563758 |
| ENSMUSG000000050944 | -1.138059988 | -0.554551155 | 1.480388073 | 0.223713814 | 0.999071534 | Efcab5        | Efcab5        | EF CAB5      | 0.421080201 | 0.355740266 | 1.279084186 | 1.318260024 | 0.457817931 | 0.291048646 | 0.776583522 | 0.069082452 | 0           | 0.522871716 |
| ENSMUSG000000031791 | -0.525636048 | 1.984950149  | 1.480201543 | 0.223742992 | 0.999071534 | Tmem38a       | Tmem38a       | TMEM38A      | 4.070441945 | 6.106874574 | 4.106533441 | 4.301609606 | 4.839789558 | 4.947826984 | 4.46535525  | 2.279720929 | 1.964216377 | 1.895409971 |
| ENSMUSG000000026193 | -0.466887469 | 11.12399357  | 1.479619353 | 0.223834088 | 0.999071534 | Fn1           | Fn1           | FN1          | 1244.993795 | 4419.42062  | 2457.995885 | 2541.327799 | 2773.395624 | 1711.875374 | 734.518581  | 3244.181047 | 1330.481605 | 1956.716679 |
| ENSMUSG000000098749 | 0.739702956  | 0.982499834  | 1.479398186 | 0.223868705 | 0.999071534 | HOTAIRM1_5    | Gm27477       |              | 0.631620302 | 0.889350666 | 2.154247051 | 2.567137942 | 0.850233301 | 1.091432423 | 2.135604685 | 1.657978857 | 3.142746204 | 2.679717545 |
| ENSMUSG000000029635 | 0.29007788   | 5.337013948  | 1.479101618 | 0.223915135 | 0.999071534 | Cdk8          | Cdk8          | CDK8         | 29.61597415 | 36.22621713 | 44.96990719 | 37.0500449  | 40.0263677  | 42.42034017 | 32.35764674 | 52.91715853 | 45.56981996 | 36.99317391 |
| ENSMUSG000000028423 | 0.270506647  | 5.427563742  | 1.478862335 | 0.223952605 | 0.999071534 | Nfx1          | Nfx1          | NFX1         | 49.96818388 | 48.61783641 | 36.48755943 | 26.85087523 | 41.20361381 | 58.86458867 | 45.81842778 | 50.43019025 | 35.67016941 | 37.77748148 |
| ENSMUSG000000051864 | -0.28587392  | 5.024596415  | 1.478535024 | 0.224003872 | 0.999071534 | Tbc1d22a      | Tbc1d22a      | TBC1D22A     | 39.58153892 | 47.49132557 | 27.93789144 | 31.22194795 | 39.24153696 | 43.58453475 | 22.13263037 | 30.05086679 | 24.19914577 | 23.13707343 |
| ENSMUSG000000020115 | 0.276273914  | 6.132636882  | 1.478424377 | 0.224021206 | 0.999071534 | Tbk1          | Tbk1          | TBK1         | 62.81113002 | 57.2741829  | 59.30911412 | 75.48773193 | 73.12006386 | 66.43185347 | 61.99725115 | 83.5897674  | 75.0306562  | 76.73142433 |
| ENSMUSG000000030605 | -0.326738254 | 7.999724985  | 1.478305778 | 0.224039787 | 0.999071534 | Mfge8         | Mfge8         | MFGE8        | 299.3178431 | 383.191557  | 225.3207775 | 291.751758  | 278.7457175 | 289.0113056 | 292.5778418 | 207.8000168 | 129.4811436 | 200.3252262 |
| ENSMUSG000000030960 | 0.307442559  | 4.521355559  | 1.478247569 | 0.224048908 | 0.999071534 | Mett10        | Mett10        | RP11-12J10.3 | 20.14166963 | 21.81873634 | 20.93658853 | 24.28373729 | 18.37811981 | 21.61036197 | 30.22204205 | 19.75758138 | 23.25632191 | 25.62071409 |
| ENSMUSG000000020390 | 0.356965169  | 7.603138021  | 1.478197143 | 0.224056809 | 0.999071534 | Ube2b         | Ube2b         | UBE2B        | 159.3788562 | 154.2726955 | 174.6286516 | 216.194644  | 175.9982933 | 117.2198422 | 236.8579741 | 256.2958984 | 202.0000123 | 211.5016091 |
| ENSMUSG000000042197 | 0.269610957  | 5.318077891  | 1.477222269 | 0.22420963  | 0.999071534 | Zfp451        | Zfp451        | ZNF451       | 26.87895285 | 37.35272798 | 45.50846895 | 32.74835429 | 44.80075469 | 44.74872934 | 39.02332197 | 42.96928539 | 36.84869924 | 45.4898393  |
| ENSMUSG000000031889 | -0.342432023 | 3.961337432  | 1.477124407 | 0.224224978 | 0.999071534 | D230025D16Rik | D230025D16Rik | C16orf70     | 15.65014748 | 22.47092683 | 14.00260583 | 16.72108768 | 20.92881971 | 20.30064306 | 16.11410808 | 11.53676955 | 9.271101302 | 10.06528053 |
| ENSMUSG000000089682 | -0.30723528  | 4.819177992  | 1.476817479 | 0.224273122 | 0.999071534 | Bcl2l2        | Bcl2l2        | BCL2L2       | 31.37047499 | 48.43996628 | 23.56207712 | 21.85536356 | 37.08325242 | 31.06944297 | 27.63343032 | 25.28417758 | 16.9708295  | 21.89525311 |
| ENSMUSG000000085156 | 0.391188049  | 4.288145088  | 1.476721973 | 0.224288105 | 0.999071534 | Gm11974       | Snhg15        |              | 22.66815083 | 12.1544591  | 21.60979073 | 17.34552664 | 13.27672    | 22.48350791 | 25.56254092 | 8.635306549 | 23.33489056 | 25.2285603  |
| ENSMUSG000000001334 | -0.57643903  | 1.962179722  | 1.476711654 | 0.224289724 | 0.999071534 | Fndc5         | Fndc5         | FND C5       | 3.719541778 | 2.905212176 | 6.597381593 | 4.440454819 | 5.690022859 | 4.074681045 | 1.164875283 | 2.210638477 | 3.8498641   | 3.137230296 |
| ENSMUSG000000034449 | -0.481852257 | 2.36112323   | 1.47557688  | 0.224467845 | 0.999071534 | Dhrs11        | Dhrs11        | DHRS11       | 6.035482885 | 5.691844263 | 8.078426441 | 4.995511672 | 5.493815174 | 5.529924276 | 4.077063489 | 3.799534882 | 1.728510412 | 5.555511983 |
| ENSMUSG000000097482 | 0.8428964    | 0.807493848  | 1.472694119 | 0.224921103 | 0.999071534 | Gm17634       | Gm17634       |              | 0.912340436 | 0.770770577 | 1.88496617  | 1.734552664 | 0.719428178 | 0.800383777 | 0.388291761 | 1.657978857 | 4.00700141  | 2.548999616 |
| ENSMUSG000000034560 | 0.300233512  | 6.300942591  | 1.472412806 | 0.224965393 | 0.999071534 | A230046K03Rik | A230046K03Rik | KIAA1033     | 57.3370874  | 88.04571594 | 71.42675378 | 53.35483994 | 97.77682959 | 77.41893986 | 68.08048874 | 112.1208202 | 79.11863568 | 76.46998847 |
| ENSMUSG000000032601 | 0.297744537  | 5.893728451  | 1.472278973 | 0.224986467 | 0.999071534 | Prkar2a       | Prkar2a       | PRKAR2A      | 43.23090066 | 43.63747268 | 72.84047841 | 59.59922953 | 55.98459273 | 86.95078302 | 44.52412191 | 50.08477799 | 71.18320152 | 62.02565732 |
| ENSMUSG000000029049 | 0.814326038  | 0.093531086  | 1.472130297 | 0.225009881 | 0.999071534 | Morn1         | Morn1         | MORN1        | 0.912340436 | 0.296450222 | 0.807842644 | 0.555056852 | 0.981038424 | 0.9459081   | 0.841298815 | 0.898071881 | 1.414235792 | 1.568615148 |
| ENSMUSG000000043613 | -0.588880995 | 9.728260429  | 1.471316543 | 0.225138088 | 0.999071534 | Mmp3          | Mmp3          | MMP3         | 444.0290722 | 2787.047117 | 963.4869935 | 627.6999179 | 484.8945917 | 581.5151949 | 334.513352  | 1421.371458 | 397.4788261 | 516.6626144 |
| ENSMUSG000000022677 | 0.336756153  | 6.084900487  | 1.471137527 | 0.225166303 | 0.999071534 | Fopnl         | Fopnl         | FOPNL        | 89.7602629  | 60.35726521 | 46.38363182 | 65.84361911 | 48.39789558 | 60.39259406 | 120.3704459 | 49.94661308 | 63.87631659 | 67.18901551 |
| ENSMUSG000000031673 | 0.650464371  | 3.214927099  | 1.47093668  | 0.225197965 | 0.999071534 | Cdh11         | Cdh11         | CDH11        | 8.281243958 | 10.5536279  | 4.577774983 | 6.383153803 | 7.259684337 | 23.28389169 | 24.52709623 | 2.279720929 | 3.064177549 | 4.771204409 |
| ENSMUSG000000059883 | -0.291184477 | 4.224954909  | 1.470823049 | 0.22521588  | 0.999071534 | Irak4         | Irak4         | IRAK4        | 23.2295911  | 20.98867572 | 22.8215547  | 17.55367296 | 21.71365045 | 19.8640701  | 15.33752455 | 16.78703593 | 13.27810271 | 15.75151045 |
| ENSMUSG000000064346 | 0.815328331  | 0.879095278  | 1.470482566 | 0.225269571 | 0.999071534 | mt-Tw         | mt-Tw         |              | 1.122880537 | 0.415030311 | 3.567971678 | 0.693821065 | 0.654025616 | 2.328389169 | 0.647152935 | 2.279720929 | 2.749902928 | 2.352927222 |
| ENSMUSG000000021958 | 0.369633206  | 3.693652686  | 1.470468139 | 0.225271846 | 0.999071534 | Pinx1         | Pinx1         | PINX1        | 12.07096577 | 7.411255551 | 15.14704958 | 9.227820171 | 14.32316099 | 17.3901566  | 15.07866338 | 9.464295978 | 12.17814154 | 16.0129463  |
| ENSMUSG000000027959 | 0.436485298  | 3.314785876  | 1.470459835 | 0.225273156 | 0.999071534 | Sass6         | Sass6         | SASS6        | 6.596923153 | 4.802493597 | 13.86796539 | 8.950291745 | 8.960150939 | 16.88082147 | 10.74273872 | 6.977327692 | 10.60676844 | 9.999921569 |
| ENSMUSG000000026087 | 0.284298658  | 6.054325173  | 1.470282815 | 0.225301077 | 0.999071534 | Mrp10         | Mrp10         | RP11-38C17.1 | 66.88157197 | 52.88671961 | 63.61760822 | 64.6641233  | 62.06703095 | 50.27865361 | 86.78320856 | 78.96124309 | 62.22637484 | 67.25437448 |
| ENSMUSG000000021519 | 0.280664988  | 4.935492623  | 1.470147023 | 0.225322498 | 0.999071534 | Mterfd1       | Mterf3        | MTERF3       | 30.10723439 | 23.12311732 | 30.83266092 | 28.23851737 | 30.4775937  | 28.59552948 | 39.60575961 | 34.26489639 | 29.46324566 | 27.51612406 |

|                    |              |              |             |             |             |                |               |          |             |             |             |             |             |             |             |             |             |             |
|--------------------|--------------|--------------|-------------|-------------|-------------|----------------|---------------|----------|-------------|-------------|-------------|-------------|-------------|-------------|-------------|-------------|-------------|-------------|
| ENSMUSG00000048495 | 0.343185938  | 4.193510087  | 1.467212212 | 0.225786059 | 0.999071534 | Tyw5           | Tyw5          | TYW5     | 13.68510654 | 14.05174052 | 21.34050985 | 15.12529923 | 18.9013403  | 15.42557824 | 21.55019273 | 21.34647779 | 21.5278115  | 15.81686941 |
| ENSMUSG00000070687 | -0.789972082 | 0.645999271  | 1.466975652 | 0.225823475 | 0.999071534 | Htr1d          | Htr1d         | HTR1D    | 2.596661241 | 1.48225111  | 2.423527932 | 0.832585279 | 2.158284533 | 0.436572969 | 0.323576467 | 1.312566595 | 1.649941757 | 1.045743432 |
| ENSMUSG00000028398 | 0.314713396  | 4.825396339  | 1.466641129 | 0.225876396 | 0.999071534 | Tmem261        | Tmem261       | TMEM261  | 32.98461576 | 18.85423412 | 24.30259954 | 28.93233843 | 25.31079134 | 26.26714031 | 38.95860667 | 21.27739534 | 29.38467701 | 33.20235397 |
| ENSMUSG00000082062 | -0.90207516  | 0.588744922  | 1.466172888 | 0.225950498 | 0.999071534 | Ftl2           | Ftl2-ps       |          | 2.807201342 | 2.786632087 | 1.211763966 | 0.901967385 | 1.569661478 | 1.309718907 | 2.394465859 | 0.552659619 | 0           | 0.522871716 |
| ENSMUSG00000037148 | -0.29558082  | 5.788332084  | 1.465998234 | 0.225978145 | 0.999071534 | Arhgap10       | Arhgap10      | ARHGAP10 | 62.60058992 | 91.1880883  | 49.07644063 | 45.37589768 | 68.86889736 | 74.43569124 | 41.35307253 | 58.30558982 | 26.87048004 | 44.90160861 |
| ENSMUSG00000021752 | 0.344732311  | 3.981564891  | 1.465041733 | 0.226129629 | 0.999071534 | Kctd6          | Kctd6         | KCTD6    | 13.26402634 | 13.69600026 | 14.47384737 | 13.39074656 | 16.87386089 | 13.38823772 | 14.30207986 | 16.51070612 | 15.79229967 | 23.26779136 |
| ENSMUSG00000059483 | 1.094352877  | -0.324319921 | 1.464954104 | 0.226143513 | 0.999071534 | Gm5528         | Gm5528        |          | 0           | 0.355740266 | 0.605881983 | 1.040731598 | 0.130805123 | 0.800383777 | 0.970729402 | 0.759906976 | 0.235705965 | 1.699333077 |
| ENSMUSG00000030970 | 0.274465559  | 5.435304101  | 1.464015806 | 0.226292243 | 0.999071534 | Ctbp2          | Ctbp2         | CTBP2    | 43.16072063 | 35.98905696 | 47.05683402 | 40.17223969 | 36.03681144 | 53.48018872 | 36.95243258 | 35.64654544 | 50.51964523 | 49.21530027 |
| ENSMUSG00000048347 | 0.755162454  | 1.688848017  | 1.462856768 | 0.226476126 | 0.999071534 | Pcdhb18        | Pcdhb18       | PCDH810  | 1.122880537 | 1.956571465 | 2.894769475 | 2.358991623 | 3.662543449 | 1.164194584 | 0.711868228 | 6.217420715 | 6.049786443 | 3.398666154 |
| ENSMUSG00000081434 | -0.896714219 | 0.907584537  | 1.462682728 | 0.226503753 | 0.999071534 | Gm14165        | Gm14165       |          | 3.859901845 | 3.438822576 | 1.615685288 | 0.901967385 | 2.027479409 | 0.072762162 | 2.329750565 | 2.417885834 | 0.31427462  | 0.588230681 |
| ENSMUSG00000034226 | -0.86016219  | 1.21674063   | 1.462479861 | 0.226535961 | 0.999071534 | Rhov           | Rhov          | RHOV     | 3.509001677 | 7.648415729 | 1.211763966 | 0.20814632  | 2.223687094 | 1.164194584 | 1.164875283 | 3.315957715 | 0.785686551 | 0.980384468 |
| ENSMUSG00000037652 | -0.309325012 | 5.170616255  | 1.461352373 | 0.226715067 | 0.999071534 | Phc3           | Phc3          | PHC3     | 28.77381375 | 33.32100496 | 44.90258697 | 49.95511672 | 48.26709046 | 40.96509694 | 20.12645627 | 40.62048201 | 24.35628308 | 29.86904678 |
| ENSMUSG00000021087 | -0.997487367 | 0.024566009  | 1.460809717 | 0.22680133  | 0.999071534 | Rtn1           | Rtn1          | RTN1     | 0.280720134 | 1.897281421 | 0.807842644 | 2.150845303 | 0.850233301 | 1.673529715 | 0.064715293 | 0.552659619 | 0.392843275 | 0.326794823 |
| ENSMUSG00000037845 | 0.476323134  | 2.590575634  | 1.460700368 | 0.226818718 | 0.999071534 | Fdxacb1        | Fdxacb1       | FDXACB1  | 5.75476275  | 5.276813952 | 5.520258068 | 2.567137942 | 6.671061283 | 5.529924276 | 9.836724609 | 5.043019025 | 5.264099892 | 7.25484506  |
| ENSMUSG00000001657 | 0.983615722  | 0.41479963   | 1.459902591 | 0.22694562  | 0.999071534 | Hoxc8          | Hoxc8         | HOXC8    | 0.701800335 | 0.592900444 | 2.221567271 | 0.20814632  | 0.457817931 | 2.255627007 | 3.494625848 | 0.069082452 | 0.942823861 | 1.176461361 |
| ENSMUSG00000022371 | -0.477125969 | 3.200649665  | 1.459545996 | 0.227002371 | 0.999071534 | Col14a1        | Col14a1       | COL14A1  | 9.12340436  | 9.308536972 | 10.09803305 | 13.7376571  | 12.23027902 | 16.66253499 | 9.642578728 | 4.006782239 | 3.457020824 | 5.097999231 |
| ENSMUSG00000047221 | 0.35854776   | 3.585311692  | 1.459369299 | 0.227030499 | 0.999071534 | Fam185a        | Fam185a       | FAM185A  | 10.8779052  | 11.73942879 | 10.70391503 | 9.158438064 | 11.64165596 | 17.17187012 | 17.21426807 | 9.187966168 | 11.07818037 | 10.39207536 |
| ENSMUSG00000033213 | -0.330326366 | 5.339467983  | 1.459165832 | 0.227062892 | 0.999071534 | AA467197       | AA467197      | C1SorF48 | 61.61806945 | 30.89011314 | 51.56728878 | 50.44079146 | 38.3259011  | 27.94067002 | 24.52709623 | 31.50159829 | 37.39867983 | 47.25453134 |
| ENSMUSG00000098950 | -2.225735018 | 1.408009396  | 1.45762408  | 0.227308533 | 0.999071534 | RP23-220D12.12 | Gm28036       |          | 3.649361744 | 17.90559341 | 0           | 0           | 0           | 5.166113468 | 0           | 0           | 0           | 0           |
| ENSMUSG00000052102 | -0.300652856 | 4.461866871  | 1.457420775 | 0.227340949 | 0.999071534 | Gnpda1         | Gnpda1        | GNPDA1   | 26.03679244 | 28.51851136 | 28.88037453 | 17.13738032 | 25.50699902 | 24.30256195 | 22.19734566 | 20.86290062 | 10.92104306 | 18.2351511  |
| ENSMUSG00000039497 | 0.285525209  | 6.758992712  | 1.457274591 | 0.22736426  | 0.999071534 | Dse            | Dse           | DSE      | 100.497808  | 120.2402101 | 84.55419675 | 89.43353534 | 112.6232111 | 108.997718  | 146.191848  | 118.338241  | 108.1104694 | 85.88167936 |
| ENSMUSG00000025869 | 0.329563589  | 5.562100964  | 1.456951632 | 0.227415771 | 0.999071534 | Nop16          | Nop16         | NOP16    | 48.91548338 | 38.59781891 | 39.71893    | 41.14358918 | 48.72490839 | 67.66881022 | 90.47198028 | 27.77114586 | 28.91326508 | 45.16304447 |
| ENSMUSG00000038304 | 0.963662938  | 0.431460936  | 1.45681809  | 0.227437075 | 0.999071534 | Cd160          | Cd160         | CD160    | 0.771980369 | 1.185800888 | 0           | 0.971349492 | 1.373453794 | 0.9459081   | 0.323576467 | 1.519813953 | 1.728510412 | 3.071871332 |
| ENSMUSG00000090779 | 1.078207594  | -0.257176048 | 1.456583373 | 0.227474525 | 0.999071534 | Gm17110        | Gm17110       |          | 0.842160403 | 0.592900444 | 0.403921322 | 0.416292639 | 0.130805123 | 0.218286485 | 0.19414588  | 0.345412262 | 1.571373102 | 2.091486864 |
| ENSMUSG00000021260 | -0.76492216  | 1.900035581  | 1.456526759 | 0.227483559 | 0.999071534 | Hhip1l         | Hhip1l        | HHIPL1   | 7.298723488 | 10.07930755 | 1.548365068 | 2.428373729 | 2.289089656 | 5.820972922 | 4.012348196 | 2.625133191 | 0.549980586 | 0.71894861  |
| ENSMUSG00000012422 | 0.315211815  | 7.398371663  | 1.456221253 | 0.227532317 | 0.999071534 | Tmem167        | Tmem167       | TMEM167A | 159.7999364 | 126.7621149 | 147.2966421 | 178.450778  | 165.599286  | 147.9254744 | 243.8472258 | 167.1795348 | 166.8798234 | 163.854924  |
| ENSMUSG00000028889 | 0.310175283  | 5.120428459  | 1.456164714 | 0.227541342 | 0.999071534 | Yrdc           | Yrdc          | YRDC     | 36.35325737 | 24.54607838 | 36.55487965 | 32.54020797 | 30.4775937  | 45.03977798 | 57.27303473 | 25.69867229 | 32.68456052 | 25.42463719 |
| ENSMUSG00000040913 | -0.316128334 | 4.405659953  | 1.453942144 | 0.227896454 | 0.999071534 | Fbxw4          | Fbxw4         | FBXW4    | 22.73833087 | 25.90974941 | 23.1581558  | 26.98963945 | 22.10606582 | 21.31931333 | 10.67802342 | 19.41216912 | 16.02800564 | 23.07171447 |
| ENSMUSG00000049866 | -0.270793532 | 6.922337147  | 1.453740703 | 0.227928672 | 0.999071534 | Ar4c           | Ar4c          | ARL4C    | 143.7287087 | 127.1178552 | 141.5744234 | 133.2136446 | 142.315974  | 169.6813607 | 111.3103048 | 95.47194921 | 70.161809   | 98.43060054 |
| ENSMUSG00000048368 | 0.823928315  | 0.260665096  | 1.453671288 | 0.227939776 | 0.999071534 | Omd            | Omd           | OMD      | 0.210540101 | 0.5336104   | 0.875162864 | 1.110113705 | 1.24264867  | 1.746291877 | 1.48845175  | 1.796143762 | 1.099961171 | 0.522871716 |
| ENSMUSG00000050578 | -0.659711413 | 10.27679823  | 1.453484857 | 0.2279696   | 0.999071534 | Mmp13          | Mmp13         | MMP13    | 500.3134591 | 4113.602571 | 1952.084429 | 615.6274314 | 749.055538  | 757.3085771 | 306.1033382 | 2159.931957 | 564.9871988 | 808.6211089 |
| ENSMUSG00000009090 | -0.284492513 | 6.166779293  | 1.453223621 | 0.228011399 | 0.999071534 | Ap1b1          | Ap1b1         | AP1B1    | 90.88314344 | 94.56762083 | 70.88819202 | 68.48013916 | 85.35034288 | 119.6209935 | 51.5780889  | 52.70991118 | 39.59860217 | 61.5027856  |
| ENSMUSG00000026277 | 0.257639346  | 6.256419096  | 1.452931282 | 0.228058185 | 0.999071534 | Stk25          | Stk25         | STK25    | 91.37440367 | 69.84367231 | 65.16597329 | 62.02760325 | 73.51247923 | 74.94502637 | 82.83557565 | 82.89894287 | 69.2975538  | 88.10388415 |
| ENSMUSG00000049119 | -0.475694762 | 2.411852556  | 1.452786838 | 0.228081307 | 0.999071534 | Fam110b        | Fam110b       | FAM110B  | 4.702062247 | 6.344034752 | 6.597381593 | 4.648601139 | 9.156358623 | 6.548594537 | 3.753487022 | 4.62852431  | 2.121353688 | 4.509768551 |
| ENSMUSG00000011832 | -0.392255022 | 3.388092289  | 1.452691955 | 0.228096496 | 0.999071534 | Ev5l           | Ev5l          | EV5L     | 12.562226   | 16.30476221 | 9.290190407 | 10.75422652 | 12.0994739  | 10.69603774 | 6.147952881 | 11.95126426 | 6.128355098 | 8.56202435  |
| ENSMUSG00000063430 | -1.219719575 | -0.003964083 | 1.452307894 | 0.228157992 | 0.999071534 | Wscd2          | Wscd2         | WSCD2    | 0.280720134 | 1.422961066 | 0.673202203 | 3.538487434 | 0.196207685 | 0.509335131 | 0           | 0.069082452 | 1.021392516 | 0.784307574 |
| ENSMUSG00000038128 | 0.659910085  | 1.449648053  | 1.452294934 | 0.228160068 | 0.999071534 | Camk4          | Camk4         | CAMK4    | 3.789721811 | 2.608761954 | 1.144443746 | 1.873316877 | 1.111843547 | 2.255627007 | 1.553167044 | 2.970545453 | 4.714119306 | 3.267948225 |
| ENSMUSG00000020812 | 0.380507299  | 4.210611067  | 1.452009779 | 0.22820574  | 0.999071534 | 1810032O08Rik  | 1810032O08Rik |          | 15.50978741 | 10.79078808 | 26.99540836 | 16.02726661 | 13.34212257 | 18.11777822 | 19.41458804 | 13.74740803 | 24.59198905 | 22.09133    |
| ENSMUSG00000019590 | -0.358077817 | 3.528137203  | 1.451780988 | 0.228242393 | 0.999071534 | Cyb561         | Cyb561        | CYB561   | 16.63266795 | 10.96865822 | 11.84835878 | 14.8477708  | 12.0994739  | 13.02442691 | 9.772009315 | 9.878790692 | 7.228316269 | 8.954178137 |

|                      |              |              |             |             |             |            |            |             |             |             |             |             |             |             |             |             |             |             |
|----------------------|--------------|--------------|-------------|-------------|-------------|------------|------------|-------------|-------------|-------------|-------------|-------------|-------------|-------------|-------------|-------------|-------------|-------------|
| ENSMUSG00000039117   | 0.344920348  | 4.040075826  | 1.450976384 | 0.228371348 | 0.999071534 | Taf4a      | Taf4       | TAF4        | 13.26402634 | 12.62877946 | 15.2143698  | 15.40282765 | 18.051107   | 21.02826468 | 11.51932224 | 21.55372515 | 18.93504588 | 14.24825426 |
| ENSMUSG000000034729  | 0.297956031  | 5.380556284  | 1.450951979 | 0.228375261 | 0.999071534 | Mrps10     | Mrps10     | MRPS10      | 40.00261912 | 36.048347   | 41.46925573 | 38.71521545 | 37.01784986 | 44.60320501 | 75.19917102 | 31.36343339 | 30.95605011 | 40.39184006 |
| ENSMUSG00000040852   | -0.429902482 | 3.363333786  | 1.450801123 | 0.228399449 | 0.999071534 | Plekhh2    | Plekhh2    | PLEKHH2     | 7.439083555 | 12.21374915 | 17.57057751 | 17.76181928 | 17.92030188 | 13.97033501 | 4.853647011 | 13.81649048 | 7.85686551  | 10.58815225 |
| ENSMUSG000000092920  | -1.256329464 | -0.419025065 | 1.450370948 | 0.22846844  | 0.999071534 | Gm10872    | Mirt2      |             | 1.614140771 | 1.304380977 | 0.471241542 | 0.138764213 | 0.981038424 | 0.145524323 | 0.517722348 | 1.036236786 | 0           | 0           |
| ENSMUSG000000071337  | 0.248092359  | 5.743158778  | 1.449360398 | 0.22863061  | 0.999071534 | Tia1       | Tia1       | TIA1        | 54.24916593 | 41.74019126 | 49.21108107 | 58.55849793 | 49.0519212  | 60.24706974 | 55.91401357 | 54.57513739 | 51.77674371 | 56.07799155 |
| ENSMUSG000000037991  | 0.481781463  | 2.18023468   | 1.449062828 | 0.228678389 | 0.999071534 | Rmi2       | Rmi2       | RM12        | 5.052962415 | 2.668051998 | 3.567971678 | 4.232308499 | 3.531738326 | 6.330308052 | 3.882917609 | 4.352194501 | 5.028393926 | 5.163358196 |
| ENSMUSG000000020248  | 0.262183774  | 4.993194685  | 1.448754596 | 0.228727893 | 0.999071534 | Nfyb       | Nfyb       | NFYB        | 28.49309362 | 29.52644211 | 32.31370576 | 26.22643628 | 33.42070898 | 35.3624105  | 42.7120937  | 34.61030865 | 22.78490998 | 32.54876432 |
| ENSMUSG000000038299  | 0.289388924  | 6.1507813    | 1.448195863 | 0.228817662 | 0.999071534 | Wdr36      | Wdr36      | WDR36       | 62.74094999 | 73.51965506 | 69.27250673 | 60.91748955 | 65.07554879 | 112.7085882 | 108.4628319 | 47.18331499 | 58.45507939 | 57.71196566 |
| ENSMUSG000000022124  | 0.268427509  | 6.44685213   | 1.447689033 | 0.228899129 | 0.999071534 | Fbxl3      | Fbxl3      | FBXL3       | 76.28569646 | 76.24699711 | 86.7084438  | 88.87847849 | 81.09917638 | 78.94694525 | 97.65537786 | 101.4130401 | 87.68261909 | 86.60062797 |
| ENSMUSG000000029781  | -0.345068563 | 6.919148746  | 1.447213463 | 0.228975603 | 0.999071534 | Fkbp9      | Fkbp9      | FKBP9       | 144.7112292 | 173.1862197 | 127.2352164 | 138.070392  | 118.8364544 | 180.5229227 | 160.6233584 | 70.46410144 | 54.29094067 | 70.39160477 |
| ENSMUSG000000034570  | -1.212755509 | -0.449532003 | 1.447051916 | 0.229001587 | 0.999071534 | Inpp5j     | Inpp5j     | INPP5J      | 1.052700503 | 1.541541155 | 0           | 0.763203172 | 0.981038424 | 0.218286485 | 0           | 0.345412262 | 0.549980586 | 0.522871716 |
| ENSMUSG000000025375  | -0.597582827 | 1.382976117  | 1.446551523 | 0.229082097 | 0.999071534 | Aatk       | Aatk       | AATK        | 3.228281543 | 4.743203553 | 2.490848153 | 2.636520049 | 2.354492217 | 3.710870238 | 2.329750565 | 1.381649048 | 0.864255206 | 1.633974113 |
| ENSMUSG000000007415  | 0.25169037   | 6.178933286  | 1.446438128 | 0.229100346 | 0.999071534 | Gatad1     | Gatad1     | GATAD1      | 67.93427247 | 81.76097124 | 62.67512514 | 62.86018853 | 67.88785894 | 98.30168022 | 82.44728389 | 57.20027058 | 66.15480759 | 78.16932155 |
| ENSMUSG000000022544  | 0.315693083  | 4.786166838  | 1.446223472 | 0.229134896 | 0.999071534 | Fam86      | Eef2kmt    | FAM86B2     | 23.51031124 | 21.93731643 | 29.21697563 | 27.68346051 | 24.26435035 | 21.90141062 | 26.85684679 | 24.59335305 | 32.84169783 | 36.99317391 |
| ENSMUSG000000000374  | 0.274522961  | 5.078430338  | 1.446020237 | 0.229167614 | 0.999071534 | Trappc10   | Trappc10   | TRAPPC10    | 36.70415754 | 38.36065873 | 26.05292527 | 21.64721724 | 36.36382425 | 52.97085359 | 37.40543963 | 28.60013529 | 27.57759794 | 34.70561015 |
| ENSMUSG000000001023  | 1.276715519  | -0.227636937 | 1.445513183 | 0.229249267 | 0.999071534 | S100a5     | S100a5     | S100A5      | 0.421080201 | 0.355740266 | 0           | 1.040731598 | 0.39241537  | 0.218286485 | 0.841298815 | 1.657978857 | 1.964216377 | 0           |
| ENSMUSG000000090544  | -0.638029954 | 1.652746007  | 1.445235663 | 0.229293972 | 0.999071534 | Gm6576     | Gm6576     |             | 8.281243958 | 3.023792265 | 2.692808814 | 2.844666369 | 2.289089656 | 2.692199976 | 3.041618794 | 3.039627905 | 0.628549241 | 2.222204793 |
| ENSMUSG0000000070490 | -1.137808801 | 0.201593903  | 1.444823373 | 0.229360406 | 0.999071534 | Gm10293    | Gm10293    |             | 0.070180034 | 2.075151554 | 1.817645949 | 1.665170557 | 1.504258917 | 1.8918162   | 0.064715293 | 1.036236786 | 0           | 0.326794823 |
| ENSMUSG000000015750  | -0.294463461 | 6.947068452  | 1.444359245 | 0.229435221 | 0.999071534 | Aph1a      | Aph1a      | APH1A       | 156.7120149 | 170.2810075 | 115.790779  | 122.8063286 | 141.2041305 | 178.5583444 | 118.7525635 | 97.06084561 | 57.51225553 | 102.4174974 |
| ENSMUSG000000007987  | -0.280454995 | 4.652650881  | 1.443776718 | 0.229529162 | 0.999071534 | Rab15      | Ift22      | IFT22       | 31.01957483 | 28.81496158 | 25.64900395 | 26.71211102 | 30.4775937  | 22.92008088 | 27.56871502 | 24.6624355  | 13.90665195 | 20.78415071 |
| ENSMUSG000000055897  | 0.466729756  | 4.239671172  | 1.443621733 | 0.229554163 | 0.999071534 | Ppp4r1l-ps | Ppp4r1l-ps |             | 12.00078574 | 11.20581839 | 22.48495359 | 21.36968882 | 14.06155074 | 12.15128097 | 8.089411685 | 23.76436362 | 27.57759794 | 28.82330335 |
| ENSMUSG000000042628  | -0.396082908 | 4.423355593  | 1.443226703 | 0.229617903 | 0.999071534 | Zfyve1     | Zfyve1     | ZFYVE1      | 23.93139144 | 37.76775829 | 12.79084186 | 22.06350988 | 29.69276296 | 22.92008088 | 11.38989165 | 26.113167   | 8.092571475 | 22.2874069  |
| ENSMUSG000000089847  | 0.288188053  | 5.746952921  | 1.443143953 | 0.229631257 | 0.999071534 | Timm10b    | Timm10b    | TIMM10B     | 58.45996794 | 35.39615651 | 53.92349649 | 58.2809695  | 43.4273009  | 48.82341038 | 58.69677119 | 46.69973782 | 61.75496291 | 62.613888   |
| ENSMUSG000000048096  | -0.546451978 | 2.130138546  | 1.441380574 | 0.229916064 | 0.999071534 | Lmod1      | Lmod1      | LMOD1       | 4.280982046 | 7.648415729 | 4.847055865 | 4.648601139 | 4.708984435 | 7.276216152 | 1.747312924 | 2.141556024 | 1.885647722 | 4.444409586 |
| ENSMUSG000000022033  | 0.44919809   | 5.589506954  | 1.440681375 | 0.230029111 | 0.999071534 | Pbk        | Pbk        | PBK         | 64.07437062 | 24.19033812 | 37.16076163 | 39.13150809 | 46.8282341  | 76.54579392 | 118.8819941 | 20.44840591 | 26.47763677 | 34.83632808 |
| ENSMUSG0000000023919 | 0.450236984  | 3.936006439  | 1.440284208 | 0.230093355 | 0.999071534 | Cenpq      | Cenpq      | CENPQ       | 18.03626862 | 12.1544591  | 7.741825339 | 13.66827499 | 15.10799173 | 20.73721603 | 36.11113376 | 12.15851162 | 8.092571475 | 9.673126747 |
| ENSMUSG000000022359  | -0.295708976 | 4.677166722  | 1.440211612 | 0.2301051   | 0.999071534 | Wdyhv1     | Wdyhv1     | WDYHV1      | 36.28307734 | 21.16654585 | 30.29409915 | 30.7362732  | 26.94585538 | 21.53759981 | 26.59798562 | 17.61602536 | 19.40645781 | 24.57497065 |
| ENSMUSG000000020834  | 0.487014945  | 3.208517501  | 1.439432813 | 0.230231146 | 0.999071534 | Dhrs13     | Dhrs13     | DHRS13      | 10.0357448  | 6.759065062 | 7.068623136 | 8.672763319 | 6.801866406 | 17.24463228 | 16.50239984 | 2.970545453 | 7.306884924 | 9.019537102 |
| ENSMUSG000000025132  | -0.356430848 | 8.554338837  | 1.438171534 | 0.230435455 | 0.999071534 | Arhgdla    | Arhgdla    | ARHGDIA     | 504.1031809 | 563.433292  | 357.6723307 | 303.3385698 | 475.4112202 | 602.2524109 | 355.8693988 | 277.7114586 | 149.673288  | 284.1154187 |
| ENSMUSG000000024087  | 0.848975023  | 1.040113297  | 1.437830142 | 0.230490794 | 0.999071534 | Cyp1b1     | Cyp1b1     | CYP1B1      | 0.842160403 | 0.237160178 | 2.221567271 | 1.80393477  | 1.962076848 | 6.475832375 | 3.235764674 | 0.27632981  | 1.257098482 | 1.633974113 |
| ENSMUSG000000023992  | -0.310355033 | 5.16609504   | 1.437495596 | 0.230545038 | 0.999071534 | Trem2      | Trem2      | TREM2       | 54.8106062  | 38.65710895 | 30.49605981 | 41.76802814 | 40.09177026 | 41.54719423 | 48.6659007  | 23.76436362 | 17.20653547 | 26.86253441 |
| ENSMUSG000000063884  | 0.335468837  | 5.594618559  | 1.437436331 | 0.230554649 | 0.999071534 | Ptcd3      | Ptcd3      | PTCD3       | 57.47744747 | 45.0011437  | 46.11435093 | 32.81777364 | 40.74579587 | 70.21548587 | 94.67847436 | 30.67260886 | 31.74173666 | 38.69250699 |
| ENSMUSG000000019210  | -0.292481049 | 6.883005853  | 1.437292099 | 0.230578041 | 0.999071534 | Atp6v1e1   | Atp6v1e1   | ATP6V1E1    | 177.4853048 | 143.0075871 | 114.1077735 | 118.4352559 | 122.5644004 | 116.7832692 | 141.5970621 | 111.0845834 | 60.73357039 | 88.43067898 |
| ENSMUSG000000063611  | 0.825938369  | 0.516085493  | 1.437215678 | 0.230590436 | 0.999071534 | Gm10134    | Gm10134    |             | 1.684320805 | 0.5336104   | 1.009803305 | 0.485674746 | 1.24264867  | 1.600767553 | 0.453007054 | 0.690824524 | 2.985608894 | 2.0261279   |
| ENSMUSG000000005469  | -0.269774616 | 5.890599115  | 1.437069501 | 0.230614148 | 0.999071534 | Prkaca     | Prkaca     | PRKACA      | 59.16176828 | 79.27078937 | 56.75094575 | 54.88124628 | 87.18161461 | 85.78658843 | 43.6828231  | 54.22972513 | 33.54881573 | 49.47673613 |
| ENSMUSG000000031530  | -0.628630062 | 4.371020438  | 1.436742526 | 0.230667199 | 0.999071534 | Dusp4      | Dusp4      | DUSP4       | 17.05374815 | 75.23906635 | 15.28169002 | 7.562649614 | 15.76201734 | 11.64194584 | 10.54859284 | 35.92287524 | 5.814080477 | 13.9868184  |
| ENSMUSG000000039637  | -0.362851014 | 4.216678347  | 1.436040259 | 0.230781189 | 0.999071534 | Coro7      | Coro7      | CORO7-PAM16 | 25.33499211 | 24.19033812 | 18.58038081 | 18.0393477  | 22.04066326 | 30.19629703 | 10.41916225 | 13.81649048 | 7.149747614 | 20.19592003 |
| ENSMUSG000000038335  | 0.282438446  | 5.785920158  | 1.434943265 | 0.230959386 | 0.999071534 | Tsr1       | Tsr1       | TSR1        | 55.6527666  | 57.03702272 | 53.65421561 | 39.33965441 | 53.10688002 | 101.6487396 | 58.37319472 | 33.2286596  | 50.36250792 | 55.48976086 |
| ENSMUSG000000016756  | 0.516574454  | 5.2900692    | 1.434523559 | 0.231027608 | 0.999071534 | Cmah       | Cmah       |             | 50.10854395 | 49.15144681 | 17.03201575 | 18.73316877 | 33.15909873 | 103.3222694 | 79.47038039 | 17.408778   | 16.26371161 | 21.76453518 |

|                     |              |              |             |             |             |               |               |          |             |             |             |             |             |             |             |             |             |             |
|---------------------|--------------|--------------|-------------|-------------|-------------|---------------|---------------|----------|-------------|-------------|-------------|-------------|-------------|-------------|-------------|-------------|-------------|-------------|
| ENSMUSG00000030423  | 0.394679729  | 3.361026174  | 1.434280178 | 0.231067179 | 0.999071534 | Pop4          | Pop4          | POP4     | 10.6673651  | 9.071376794 | 8.953589305 | 6.452535909 | 10.59521498 | 12.36956746 | 18.12028217 | 8.428059192 | 6.756904338 | 10.71887018 |
| ENSMUSG00000079022  | 0.744266979  | 0.795380534  | 1.43380372  | 0.231144671 | 0.999071534 | Col22a1       | Col22a1       | COL22A1  | 1.263240604 | 1.185800888 | 1.481044848 | 0.971349492 | 1.373453794 | 0.654859454 | 0.906014109 | 1.4507315   | 3.064177549 | 3.137230296 |
| ENSMUSG00000016257  | 0.283229765  | 5.932563468  | 1.433119045 | 0.231256082 | 0.999071534 | Slmo2         | Slmo2         | PRELID38 | 54.88078623 | 39.90219989 | 68.86858541 | 58.97479057 | 62.3286412  | 61.84783729 | 83.09443683 | 46.90698518 | 62.54064946 | 65.48968243 |
| ENSMUSG000000061028 | 0.328203227  | 4.84504728   | 1.43280112  | 0.231307838 | 0.999071534 | Clasrp        | Clasrp        | CLASRP   | 23.8612114  | 24.19033812 | 24.57188042 | 28.5854279  | 30.28138602 | 28.08619435 | 16.11410808 | 37.16635939 | 27.57759794 | 42.94083968 |
| ENSMUSG00000022141  | 0.315786491  | 6.08934194   | 1.431636657 | 0.231497521 | 0.999071534 | Nipbl         | Nipbl         | NIPBL    | 48.84530335 | 75.23906635 | 60.58819831 | 57.79529476 | 72.07362288 | 82.439529   | 37.27600904 | 75.1617082  | 87.05406985 | 75.35888607 |
| ENSMUSG00000038028  | 0.562792947  | 2.419895112  | 1.431624127 | 0.231499563 | 0.999071534 | 9630033F20Rik | Tigar         | TIGAR    | 5.474042616 | 2.786632087 | 5.654898509 | 2.01208109  | 6.14784079  | 10.18670261 | 10.16030108 | 3.108710358 | 4.566981996 | 2.941153403 |
| ENSMUSG00000027088  | 0.325341787  | 4.33963895   | 1.431527277 | 0.231515348 | 0.999071534 | Phospho2      | Phospho2      | PHOSPHO2 | 19.79076946 | 20.21790514 | 20.12874588 | 14.98653501 | 17.78949675 | 21.02826468 | 35.59341141 | 17.408778   | 17.04939816 | 16.92797181 |
| ENSMUSG00000089636  | -0.961701515 | -0.229851781 | 1.43146141  | 0.231526084 | 0.999071534 | 1700058P15Rik | 1700058P15Rik |          | 0.912340436 | 1.007930755 | 0.673202203 | 1.665170557 | 0.588623054 | 0.800383777 | 0.906014109 | 0.27632981  | 0           | 0.457512752 |
| ENSMUSG00000082100  | -0.662717941 | 2.610014498  | 1.43111632  | 0.231582341 | 0.999071534 | Glns-ps1      | Glns-ps1      |          | 11.36916543 | 12.98451973 | 2.827449254 | 2.636520049 | 8.633138131 | 9.677367482 | 5.371369359 | 4.559441858 | 0.549980586 | 3.725460977 |
| ENSMUSG00000055491  | 0.27765795   | 4.952183311  | 1.431022058 | 0.23159771  | 0.999071534 | Pprc1         | Pprc1         | PPRC1    | 30.73885469 | 25.13897883 | 32.91958775 | 26.29581838 | 29.69276296 | 53.18914007 | 23.94465859 | 26.38949681 | 28.12757853 | 34.57489222 |
| ENSMUSG00000048922  | 0.374479994  | 4.525712346  | 1.43075974  | 0.231640489 | 0.999071534 | Cdca2         | Cdca2         | CDCA2    | 24.0717515  | 12.6880695  | 29.82285761 | 17.90058349 | 19.09754799 | 36.74489157 | 20.12645627 | 13.19474841 | 31.19175607 | 23.13707343 |
| ENSMUSG00000002227  | -0.341411654 | 5.511281916  | 1.429903071 | 0.231780258 | 0.999071534 | Mov10         | Mov10         | MOV10    | 47.44170267 | 37.70846824 | 71.96531555 | 52.79978308 | 53.43389282 | 54.71714546 | 17.21426807 | 40.82772936 | 27.97044121 | 56.01263258 |
| ENSMUSG00000031604  | 0.347012082  | 6.359763291  | 1.429554181 | 0.23183721  | 0.999071534 | Sc4mol        | Msmo1         | MSMO1    | 91.30422364 | 38.95355918 | 73.51368061 | 94.91472176 | 74.36271253 | 111.6171558 | 128.4598576 | 45.31808877 | 77.78296855 | 83.52875664 |
| ENSMUSG00000026213  | 0.350153651  | 4.260275644  | 1.429299744 | 0.231878755 | 0.999071534 | Stk11ip       | Stk11ip       | STK11IP  | 19.22932919 | 17.90559341 | 17.43593707 | 11.72557601 | 21.05962483 | 16.95358363 | 13.13720458 | 26.87307398 | 16.49941757 | 28.3657906  |
| ENSMUSG00000019808  | 0.328932351  | 4.52333234   | 1.428271903 | 0.232046672 | 0.999071534 | Adat2         | Adat2         | ADAT2    | 24.84373187 | 20.6922255  | 18.37842015 | 17.06799821 | 24.65676572 | 22.92008088 | 39.21746785 | 18.8595095  | 22.70634132 | 18.2351511  |
| ENSMUSG00000048701  | -0.279802828 | 6.802208619  | 1.428030305 | 0.232086163 | 0.999071534 | Ccdc6         | Ccdc6         | CCDC6    | 98.11168689 | 131.3867384 | 125.3502503 | 131.4790919 | 147.548179  | 121.2217611 | 68.92178756 | 107.4922959 | 75.50447755 | 116.4043158 |
| ENSMUSG00000017493  | -0.399385754 | 11.52383983  | 1.428016833 | 0.232088365 | 0.999071534 | Igfbp4        | Igfbp4        | IGFBP4   | 3040.760493 | 4076.664873 | 2914.359659 | 3875.337561 | 3441.221181 | 1624.924591 | 1300.259677 | 4106.5373   | 2085.997793 | 2860.500441 |
| ENSMUSG00000081593  | 1.379898129  | -0.436191201 | 1.427874688 | 0.232111604 | 0.999071534 | Gm11841       | Gm11841       |          | 1.263240604 | 0.237160178 | 0           | 0           | 0.261610246 | 0.145524323 | 1.100159989 | 0.207247357 | 0.15713731  | 2.61435858  |
| ENSMUSG00000003934  | 0.776841282  | 0.730809548  | 1.427433988 | 0.23218367  | 0.999071534 | Efnb3         | Efnb3         | EFNB3    | 0.280720134 | 0.474320355 | 1.413724627 | 1.387642131 | 2.289089656 | 1.528005392 | 1.29430587  | 1.243484143 | 2.042785033 | 3.071871332 |
| ENSMUSG00000039176  | 0.262440263  | 5.504933599  | 1.427165917 | 0.23222752  | 0.999071534 | Polg          | Polg          | POLG     | 55.0211463  | 41.97735144 | 41.13265463 | 29.14048475 | 47.74386997 | 64.97661024 | 38.50559962 | 44.14368708 | 39.99144544 | 53.13683814 |
| ENSMUSG00000090625  | 0.735233437  | 0.405583248  | 1.426612899 | 0.232318011 | 0.999071534 | Gm20721       | Gm20721       |          | 0.631620302 | 0.830060622 | 1.144443746 | 0.624438959 | 1.438856355 | 0.873145938 | 1.035444696 | 2.141556024 | 1.257098482 | 1.764692042 |
| ENSMUSG00000079020  | -0.263556879 | 5.260626726  | 1.425629587 | 0.232479019 | 0.999071534 | Slc45a4       | Slc45a4       | SLC45A4  | 36.42343741 | 46.95771517 | 37.83396383 | 50.23264514 | 44.2775342  | 53.11637791 | 31.45163263 | 27.70206341 | 25.69195022 | 33.39843086 |
| ENSMUSG00000075229  | 0.369018997  | 4.524762486  | 1.425544807 | 0.232492907 | 0.999071534 | Ccdc58        | Ccdc58        | CCDC58   | 15.93086761 | 21.2258359  | 25.64900395 | 20.25957511 | 20.47100178 | 14.62519447 | 30.7397644  | 37.4426892  | 13.51380868 | 27.2546882  |
| ENSMUSG00000033972  | 0.386174498  | 3.707405371  | 1.425494839 | 0.232501093 | 0.999071534 | Zfp944        | Zfp944        |          | 10.52700503 | 7.648415729 | 14.33920693 | 12.6969255  | 12.81890207 | 11.64194584 | 13.59021163 | 11.81309936 | 18.62077126 | 12.81035704 |
| ENSMUSG00000022469  | 0.254328854  | 5.713026366  | 1.425200771 | 0.232549275 | 0.999071534 | Rapgef3       | Rapgef3       | RAPGEF3  | 60.07410871 | 52.35310921 | 40.0555311  | 42.66999553 | 53.43389282 | 88.55155057 | 51.12508185 | 45.52533613 | 40.30572007 | 56.20870947 |
| ENSMUSG00000071180  | 0.307086962  | 6.965911735  | 1.425198835 | 0.232549592 | 0.999071534 | Smim15        | Smim15        | SMIM15   | 141.9040278 | 98.65863389 | 97.07575773 | 111.5664273 | 131.3283437 | 127.4065448 | 208.5126756 | 96.7845158  | 110.1532544 | 122.4826995 |
| ENSMUSG00000046523  | 0.534677891  | 1.768875976  | 1.424108822 | 0.232728293 | 0.999071534 | Kctd4         | Kctd4         | KCTD4    | 2.526481208 | 3.201662398 | 2.490848153 | 2.428373729 | 3.27012808  | 3.128772945 | 3.17104938  | 5.733843549 | 3.457020824 | 2.941153403 |
| ENSMUSG00000035215  | 0.454301268  | 5.656179433  | 1.422839378 | 0.23293662  | 0.999071534 | Lsm7          | Lsm7          | LSM7     | 44.1432411  | 24.60536843 | 61.26140051 | 65.01103384 | 22.76009144 | 33.10678349 | 46.72444189 | 33.2286596  | 93.57526822 | 57.71196566 |
| ENSMUSG00000068921  | -0.247583797 | 6.497360077  | 1.422810467 | 0.232941367 | 0.999071534 | Dap3          | Dap3          | DAP3     | 111.0248131 | 93.20394981 | 114.9156161 | 98.17568077 | 90.7787555  | 101.794264  | 86.58906268 | 70.94767861 | 65.91910163 | 76.07783468 |
| ENSMUSG00000020863  | 0.449833164  | 8.020091799  | 1.422367095 | 0.233014184 | 0.999071534 | Luc7B         | Luc7B         | LUC7L3   | 190.398431  | 128.7779765 | 326.8396698 | 278.2916294 | 206.7374972 | 206.8628252 | 123.6062105 | 256.5031457 | 389.2291174 | 411.1732457 |
| ENSMUSG00000035762  | 0.305819334  | 4.107349983  | 1.421500337 | 0.233156613 | 0.999071534 | Tmem161b      | Tmem161b      | TMEM161B | 17.33446828 | 16.06760203 | 15.95489222 | 14.22333184 | 15.95822503 | 17.3901566  | 22.06791508 | 18.8595095  | 12.33527885 | 20.84950968 |
| ENSMUSG00000074656  | 0.361415693  | 8.901651478  | 1.420869935 | 0.233260269 | 0.999071534 | Eif2s2        | Eif2s2        | EIF2S2   | 399.9560112 | 286.4894946 | 575.4532435 | 511.3461253 | 387.9679954 | 369.3407319 | 552.5391757 | 468.7935219 | 577.7398896 | 554.5054549 |
| ENSMUSG00000020330  | 0.311741403  | 5.212118813  | 1.41991048  | 0.233418138 | 0.999071534 | Hmmr          | Hmmr          | HMMR     | 47.65224277 | 28.99283172 | 24.23527932 | 31.01380163 | 39.83016001 | 58.20972922 | 47.50102541 | 25.49142493 | 39.75573948 | 28.1697137  |
| ENSMUSG000000085180 | 1.037500754  | -0.210109972 | 1.419878147 | 0.23342346  | 0.999071534 | Al838599      | Al838599      |          | 0.491260235 | 0.592900444 | 0           | 0.901967385 | 0.523220493 | 0.363810808 | 0.582437641 | 0.552659619 | 1.807079067 | 1.241820326 |
| ENSMUSG00000009093  | 0.85382525   | -0.145663488 | 1.419509859 | 0.233484095 | 0.999071534 | Gstt4         | Gstt4         |          | 0.842160403 | 0.415030311 | 0.605881983 | 0.555056852 | 0.457817931 | 0.363810808 | 1.29430587  | 1.105319238 | 1.178529826 | 0.71894861  |
| ENSMUSG00000052446  | 0.485058203  | 3.131685729  | 1.419039633 | 0.233561539 | 0.999071534 | Zfp961        | Zfp961        |          | 10.80772517 | 7.351965506 | 6.260780492 | 5.064893778 | 8.109917638 | 18.19054038 | 16.43768454 | 6.770080335 | 3.928432755 | 5.816947841 |
| ENSMUSG00000005824  | -0.789568231 | 0.829759326  | 1.418963277 | 0.233574118 | 0.999071534 | Tnfsf14       | Tnfsf14       | TNFSF14  | 2.456301174 | 2.845922132 | 1.615685288 | 2.705902155 | 1.111843547 | 1.164194584 | 2.200319978 | 1.312566595 | 1.021392516 | 0.065358965 |
| ENSMUSG00000032392  | 0.455192155  | 3.021224061  | 1.41890008  | 0.233584529 | 0.999071534 | Parp16        | Parp16        | PARP16   | 7.509263589 | 7.707705773 | 7.203263577 | 4.093544286 | 8.698540692 | 7.931075606 | 5.824376413 | 14.43823255 | 8.878258026 | 6.666614379 |
| ENSMUSG00000022676  | 0.316436431  | 4.720404698  | 1.417991934 | 0.233734204 | 0.999071534 | Snai2         | Snai2         | SNAI2    | 15.36942735 | 21.64086621 | 29.55357673 | 27.33654998 | 26.88045282 | 27.14028625 | 21.29133155 | 32.67599998 | 28.83469642 | 28.30043163 |

|                     |              |             |             |             |             |               |               |           |             |             |             |             |             |             |             |             |             |             |
|---------------------|--------------|-------------|-------------|-------------|-------------|---------------|---------------|-----------|-------------|-------------|-------------|-------------|-------------|-------------|-------------|-------------|-------------|-------------|
| ENSMUSG000000031723 | -0.389163853 | 3.293271847 | 1.417572451 | 0.233803379 | 0.999071534 | TxnI4b        | TxnI4b        | TXNL4B    | 9.12340436  | 7.52983564  | 14.54116759 | 12.76630761 | 12.75349951 | 10.69603774 | 7.895265804 | 7.322739954 | 7.542590889 | 7.124127131 |
| ENSMUSG000000085134 | 0.748365721  | 0.876291523 | 1.417212814 | 0.233862705 | 0.999071534 | Gm11659       | Gm11659       |           | 1.333420637 | 1.185800888 | 2.221567271 | 1.179495811 | 0.719428178 | 0.654859454 | 1.747312924 | 1.381649048 | 3.928432755 | 1.960768935 |
| ENSMUSG000000031262 | 0.355864272  | 4.902074298 | 1.416517602 | 0.23397744  | 0.999071534 | Cenpi         | Cenpi         | CENPI     | 37.89721811 | 21.46299608 | 24.84116131 | 23.79806255 | 27.99229636 | 44.31215637 | 56.23759003 | 15.40538688 | 23.49202787 | 25.16320133 |
| ENSMUSG000000045838 | 0.322372805  | 5.064118987 | 1.415686714 | 0.234114656 | 0.999071534 | A430105I19Rik | A430105I19Rik | C1Sorf52  | 28.91417382 | 26.62122994 | 37.43004251 | 26.71211102 | 34.20553971 | 31.21496729 | 20.25588866 | 33.85040167 | 37.08440521 | 53.00612021 |
| ENSMUSG000000023025 | 0.262010794  | 6.755839534 | 1.413918107 | 0.234407053 | 0.999071534 | Larp4         | Larp4         | LARP4     | 89.7602629  | 101.9788764 | 106.2313077 | 99.97961554 | 111.445965  | 154.9106419 | 121.6000364 | 97.33717542 | 106.7748023 | 90.84896066 |
| ENSMUSG000000024645 | 0.357675991  | 3.793297811 | 1.413451934 | 0.234484197 | 0.999071534 | Timm21        | Timm21        | TIMM21    | 14.45708691 | 12.62877946 | 10.9058757  | 13.39074656 | 11.05303291 | 15.1345296  | 23.75051271 | 11.81309936 | 9.192532646 | 15.29399769 |
| ENSMUSG000000042590 | 0.300533318  | 4.952472007 | 1.412971104 | 0.234563799 | 0.999071534 | Ipo11         | Ipo11         | IPO11     | 27.86147332 | 28.93354167 | 27.26468924 | 25.60199732 | 34.07473459 | 46.93159418 | 47.50102541 | 18.23776743 | 26.87048004 | 27.51612406 |
| ENSMUSG000000040481 | 0.412654105  | 6.372919451 | 1.411913525 | 0.234738997 | 0.999071534 | Bptf          | Bptf          | BPTF      | 44.3537812  | 58.63785392 | 101.2496114 | 82.77285311 | 79.79112515 | 74.21740475 | 32.16350086 | 95.67919657 | 128.0669078 | 107.3847787 |
| ENSMUSG000000084328 | 0.685192154  | 0.758158231 | 1.411328448 | 0.234835988 | 0.999071534 | Gm14046       | Gm14046       |           | 1.19306057  | 1.48225111  | 1.009803305 | 0.832585279 | 1.700466601 | 1.600767553 | 3.106334087 | 1.519813953 | 0.628549241 | 2.548999616 |
| ENSMUSG000000022244 | -0.397283185 | 4.058367611 | 1.410034665 | 0.235050639 | 0.999071534 | Amacr         | Amacr         | AMACR     | 19.43986929 | 16.83837261 | 25.58168373 | 19.70451826 | 15.76201734 | 23.13836736 | 22.52092213 | 8.704389002 | 5.264099892 | 12.41820326 |
| ENSMUSG000000037876 | 0.328567435  | 6.318463831 | 1.409687938 | 0.235108204 | 0.999071534 | Jmjd1c        | Jmjd1c        | JMJD1C    | 58.67050804 | 99.31082438 | 64.29081043 | 51.34275885 | 95.09532456 | 69.85167506 | 62.32082762 | 134.8489471 | 68.19759262 | 87.38493554 |
| ENSMUSG000000031736 | 0.674473239  | 2.525542578 | 1.409538629 | 0.235132998 | 0.999071534 | 4933436C20Rik | Crnde         |           | 3.649361744 | 2.430891821 | 4.443134543 | 8.256470679 | 3.466335765 | 3.710870238 | 1.68259763  | 3.523205072 | 13.74951464 | 8.300588492 |
| ENSMUSG000000025190 | -0.262171308 | 4.972557034 | 1.408114403 | 0.235369665 | 0.999071534 | Got1          | Got1          | GOT1      | 37.68667801 | 39.13142931 | 32.71762709 | 33.99723221 | 33.5515141  | 41.69271855 | 28.15115266 | 29.49820717 | 19.64216377 | 21.11094554 |
| ENSMUSG000000086316 | -0.264252536 | 5.35664765  | 1.406873463 | 0.23557611  | 0.999071534 | 2210013O21Rik | 2210013O21Rik | LINC01420 | 44.21342113 | 44.88256362 | 44.22938476 | 54.18742521 | 43.03488553 | 33.90716727 | 35.52869612 | 34.88663846 | 26.32049946 | 48.36563373 |
| ENSMUSG000000032400 | 0.339504276  | 4.06164833  | 1.406803702 | 0.235587722 | 0.999071534 | Zwilch        | Zwilch        | ZWILCH    | 19.58022936 | 9.54569715  | 13.66600473 | 13.94580342 | 19.42456079 | 23.57494033 | 21.8737692  | 17.20153065 | 14.92804447 | 12.54892118 |
| ENSMUSG000000040189 | 0.662293983  | 1.425316155 | 1.406595459 | 0.23562239  | 0.999071534 | Ccdc114       | Ccdc114       | CCDC114   | 3.509001677 | 0.948640711 | 2.221567271 | 1.457024238 | 2.223687094 | 1.673529715 | 1.29430587  | 2.901463001 | 3.355589479 | 5.22871716  |
| ENSMUSG000000055723 | 0.243355973  | 6.255028653 | 1.406116171 | 0.235702202 | 0.999071534 | Rras2         | Rras2         | RRAS2     | 67.23247213 | 68.59858138 | 73.64832105 | 75.97340667 | 76.52099707 | 96.19157753 | 91.70157086 | 70.78859616 | 70.161809   | 71.17591235 |
| ENSMUSG000000046546 | -0.295461744 | 4.688272686 | 1.405795445 | 0.235755629 | 0.999071534 | Fam43a        | Fam43a        | FAM43A    | 30.03705436 | 25.25755892 | 29.95749805 | 31.91576901 | 29.23494503 | 28.95934029 | 13.07248928 | 23.90252853 | 20.66355629 | 24.77104755 |
| ENSMUSG000000028108 | -0.341223819 | 10.10117795 | 1.405771023 | 0.235759698 | 0.999071534 | Ecm1          | Ecm1          | ECM1      | 1415.741817 | 1330.646467 | 1562.300353 | 1006.52622  | 1069.593492 | 701.1361884 | 726.4938846 | 1189.392583 | 851.6056526 | 1118.357242 |
| ENSMUSG000000002718 | 0.279464572  | 6.082325126 | 1.405742105 | 0.235764516 | 0.999071534 | Cse1l         | Cse1l         | CSE1L     | 63.93401056 | 54.84329108 | 57.76074905 | 66.19052965 | 74.36271253 | 115.1825017 | 89.307105   | 44.21276953 | 56.49086302 | 61.5027856  |
| ENSMUSG000000034101 | -0.301711672 | 6.681936302 | 1.405703998 | 0.235770865 | 0.999071534 | Ctnnd1        | Ctnnd1        | CTNND1    | 102.9541092 | 138.0272234 | 123.0613628 | 83.39729207 | 143.1008048 | 154.3285446 | 61.47952881 | 106.594224  | 56.1765884  | 79.08434705 |
| ENSMUSG000000066551 | 0.363056439  | 8.93814877  | 1.40529096  | 0.235839696 | 0.999071534 | Hmgb1         | Hmgb1         |           | 366.9713954 | 263.6035374 | 555.6610987 | 531.1200256 | 499.0869475 | 476.2283472 | 557.0692463 | 385.1346721 | 631.3777124 | 550.8453528 |
| ENSMUSG000000097084 | -0.719438635 | 0.629941849 | 1.404708436 | 0.235936813 | 0.999071534 | Foxl1         | Foxl1         | FOXL1     | 2.315941107 | 1.719411288 | 0.605881983 | 2.914048475 | 1.504258917 | 1.819054038 | 0.776583522 | 0.898071881 | 1.021392516 | 0.71894861  |
| ENSMUSG000000063652 | 0.497733106  | 3.017609033 | 1.404462551 | 0.235977821 | 0.999071534 | Slc22a21      | Slc22a21      | SLC22A5   | 5.54422265  | 7.351965506 | 9.155549966 | 7.562649614 | 4.51277675  | 3.565345915 | 7.183397576 | 13.54016067 | 8.32827744  | 10.91494707 |
| ENSMUSG000000024084 | 0.586745829  | 3.119442195 | 1.404125061 | 0.23603412  | 0.999071534 | Qpct          | Qpct          | QPCT      | 5.895122818 | 5.691844263 | 2.692808814 | 9.227820171 | 11.96866877 | 3.274297269 | 6.018522294 | 14.85272726 | 6.678335683 | 17.58156145 |
| ENSMUSG000000020534 | 0.340923699  | 4.575627716 | 1.402586927 | 0.236290915 | 0.999071534 | Shmt1         | Shmt1         | SHMT1     | 23.36995117 | 12.51019937 | 23.96599844 | 22.2022741  | 26.55344001 | 38.63670777 | 26.40383974 | 13.67832557 | 26.00622484 | 24.44425272 |
| ENSMUSG000000000792 | 1.004192148  | 0.420667699 | 1.402380262 | 0.236325443 | 0.999071534 | Slc5a5        | Slc5a5        | SLC5A5    | 0.842160403 | 0           | 0.201960661 | 2.081463196 | 0.981038424 | 1.45524323  | 0.388291761 | 1.934308667 | 1.257098482 | 2.745076509 |
| ENSMUSG000000030257 | -0.452181591 | 4.521877582 | 1.402018589 | 0.236385885 | 0.999071534 | Srgap3        | Srgap3        | SRGAP3    | 15.36942735 | 41.02871073 | 23.89867822 | 27.5446963  | 28.97333479 | 21.61036197 | 9.383717555 | 38.96250315 | 7.071178959 | 17.58156145 |
| ENSMUSG000000040829 | -0.449877213 | 2.836436226 | 1.401553539 | 0.236463631 | 0.999071534 | Zmynd15       | Zmynd15       | ZMYND15   | 10.17610486 | 11.26510844 | 7.337904017 | 5.481186417 | 7.979112515 | 8.294886414 | 4.335924663 | 6.908245239 | 2.592765618 | 7.25484506  |
| ENSMUSG000000027338 | 0.694483632  | 2.594261468 | 1.401197965 | 0.236523095 | 0.999071534 | Prnd          | Prnd          | PRND      | 7.158363421 | 2.312311732 | 5.116336746 | 3.677251647 | 5.232204928 | 21.10102684 | 7.506974044 | 0.552659619 | 2.985608894 | 6.470537486 |
| ENSMUSG000000020022 | -0.416321417 | 3.655652221 | 1.400956752 | 0.236563445 | 0.999071534 | Ndufa12       | Ndufa12       | NDUFA12   | 16.49230788 | 11.32439848 | 19.11894258 | 8.950291745 | 18.57432749 | 13.02442691 | 14.23736457 | 4.352194501 | 6.992610304 | 13.85610048 |
| ENSMUSG000000006403 | -0.366557226 | 5.23240038  | 1.400371834 | 0.236661323 | 0.999071534 | Adamts4       | Adamts4       | ADAMTS4   | 48.56458321 | 78.97433915 | 34.66991348 | 24.97755836 | 33.35530641 | 56.5361995  | 38.89389138 | 26.94215643 | 14.61376985 | 28.1697137  |
| ENSMUSG000000018672 | -0.279399074 | 6.158488664 | 1.400314871 | 0.236670858 | 0.999071534 | Cop2          | Cop2          | COP22     | 68.35535267 | 90.89163808 | 84.55419675 | 82.00964994 | 79.46411234 | 49.11445903 | 61.5442441  | 86.76756021 | 47.21976171 | 63.00604178 |
| ENSMUSG000000057541 | 0.272197507  | 5.900107727 | 1.39986516  | 0.236746149 | 0.999071534 | Pus7          | Pus7          | PUS7      | 50.88052432 | 38.59781891 | 70.4842707  | 59.73799374 | 59.7779413  | 66.9411886  | 58.50262531 | 52.50266382 | 67.80474935 | 65.03216968 |
| ENSMUSG000000043051 | -0.81199705  | 0.072754953 | 1.399806805 | 0.236755921 | 0.999071534 | Disc1         | Disc1         | DISC1     | 1.403600671 | 0.474320355 | 1.817645949 | 1.318260024 | 1.046440986 | 0.9459081   | 0.453007054 | 0.690824524 | 0.785686551 | 0.326794823 |
| ENSMUSG000000006740 | 0.312692961  | 7.703433205 | 1.399684952 | 0.236776327 | 0.999071534 | Kif5b         | Kif5b         | KIF5B     | 160.1508365 | 201.645441  | 199.4698129 | 220.6350988 | 179.0068111 | 263.2535004 | 203.2707368 | 183.4139111 | 262.0264648 | 187.3841512 |
| ENSMUSG000000031701 | 0.341286362  | 7.530715418 | 1.398905791 | 0.236906863 | 0.999071534 | Dnaja2        | Dnaja2        | DNAJA2    | 127.2364008 | 140.9324356 | 188.7658978 | 205.093507  | 180.0532521 | 200.896328  | 141.338201  | 154.3992811 | 250.3983038 | 226.2727351 |
| ENSMUSG000000004880 | 0.342849665  | 5.55288425  | 1.39887975  | 0.236911227 | 0.999071534 | Lbr           | Lbr           | LBR       | 56.0738468  | 30.94940318 | 40.79605353 | 38.1601586  | 48.92111607 | 85.20449114 | 82.3825686  | 26.25133191 | 32.44885456 | 35.48991773 |
| ENSMUSG000000021374 | 0.24278164   | 6.249049283 | 1.397861628 | 0.237081932 | 0.999071534 | Nup153        | Nup153        | NUP153    | 69.61859327 | 70.4958628  | 76.20648943 | 68.27199284 | 76.58639963 | 116.6377449 | 76.23461572 | 64.52301054 | 67.883318   | 77.58109087 |

|                     |              |              |             |             |             |               |               |               |             |             |             |             |             |             |             |             |             |             |
|---------------------|--------------|--------------|-------------|-------------|-------------|---------------|---------------|---------------|-------------|-------------|-------------|-------------|-------------|-------------|-------------|-------------|-------------|-------------|
| ENSMUSG00000054079  | 0.256144918  | 6.093036061  | 1.397040743 | 0.237219676 | 0.999071534 | Utp18         | Utp18         | UTP18         | 70.88183388 | 60.41655525 | 65.43525417 | 65.77423701 | 59.58173361 | 95.82776672 | 94.54904377 | 55.05871456 | 56.49086302 | 60.84919595 |
| ENSMUSG00000055612  | 0.453637767  | 4.712974967  | 1.396752546 | 0.237268073 | 0.999071534 | Cdca7         | Cdca7         | CDCA7         | 35.58127701 | 11.73942879 | 28.34181276 | 15.81912029 | 23.47951961 | 65.84975618 | 41.676649   | 10.36236786 | 17.04939816 | 19.54233039 |
| ENSMUSG00000008668  | 0.442117002  | 10.21789463  | 1.396379856 | 0.237330642 | 0.999071534 | Rps18         | Rps18         | RPS18         | 1023.365249 | 645.8464537 | 1425.236385 | 1302.024611 | 809.4875049 | 589.3735083 | 1084.045881 | 1216.472904 | 1979.222991 | 1368.943512 |
| ENSMUSG00000040219  | 0.439251818  | 3.13509293   | 1.39541941  | 0.237492019 | 0.999071534 | Ttc12         | Ttc12         | TTC12         | 4.982782381 | 9.01208675  | 7.741825339 | 9.019673851 | 7.194281776 | 6.621356699 | 6.600959935 | 12.43484143 | 9.978219197 | 11.17638293 |
| ENSMUSG00000079853  | 0.39419411   | 4.734045064  | 1.395091358 | 0.237547169 | 0.999071534 | Klra1         | Klra1         |               | 27.72111325 | 17.66843323 | 21.54247051 | 29.97307003 | 21.38663764 | 24.08427546 | 63.42098761 | 19.68849893 | 16.9708295  | 21.96061207 |
| ENSMUSG00000048118  | 0.345547106  | 4.660709524  | 1.39469765  | 0.237613378 | 0.999071534 | Arid4a        | Arid4a        | ARID4A        | 15.72032751 | 17.90559341 | 28.27449254 | 26.08767206 | 26.61884257 | 28.01343219 | 14.23736457 | 30.05086679 | 24.90626367 | 37.64676355 |
| ENSMUSG000000085282 | 0.964666307  | 0.195748005  | 1.394697015 | 0.237613485 | 0.999071534 | Gm15663       | Gm15663       |               | 1.122880537 | 0.355740266 | 0.740522424 | 0.138764213 | 1.308051232 | 1.164194584 | 0.129430587 | 0.759906976 | 2.435628308 | 1.764692042 |
| ENSMUSG000000036155 | -0.327656882 | 4.925178371  | 1.394678513 | 0.237616597 | 0.999071534 | Mgat5         | Mgat5         | MGAT5         | 33.12497583 | 54.19110059 | 22.61959403 | 38.64583335 | 25.83401183 | 46.56778337 | 27.11570797 | 20.310241   | 17.83508471 | 22.15668897 |
| ENSMUSG00000052293  | 0.658190109  | 1.769755208  | 1.394397032 | 0.237663947 | 0.999071534 | Taf9          | Taf9          | TAF9          | 2.456301174 | 1.541541155 | 4.645095204 | 1.665170557 | 2.943115272 | 10.18670261 | 1.812028217 | 1.72706131  | 4.399844685 | 2.156845829 |
| ENSMUSG000000093119 | 1.445137553  | -0.769043236 | 1.394299424 | 0.23768037  | 0.999071534 | Gm25640       | Gm25640       |               | 0           | 0.237160178 | 0.740522424 | 0           | 0.327012808 | 0.509335131 | 0.129430587 | 1.243484143 | 1.257098482 | 0           |
| ENSMUSG000000050107 | 0.522449256  | 2.832736081  | 1.393166785 | 0.237871033 | 0.999071534 | Gsg2          | Gsg2          | GSG2          | 5.403862583 | 3.794562842 | 4.375814322 | 8.533999106 | 7.521294584 | 14.11585934 | 12.74891282 | 3.45412262  | 6.678335683 | 3.986896835 |
| ENSMUSG00000040540  | -1.087257327 | 1.850435278  | 1.3926083   | 0.237965114 | 0.999071534 | Gm9770        | Gm9770        |               | 7.579443623 | 15.11896132 | 1.211763966 | 0           | 0.850233301 | 3.128772945 | 5.177223478 | 1.72706131  | 0.235705965 | 0.915025503 |
| ENSMUSG000000086825 | 0.737744758  | 0.475156169  | 1.392588389 | 0.237968469 | 0.999071534 | Gm15675       | Gm15675       |               | 0.701800335 | 0.830060622 | 1.683005509 | 0.971349492 | 0.719428178 | 0.9459081   | 0.841298815 | 1.588896405 | 2.199922343 | 1.764692042 |
| ENSMUSG00000044950  | 0.361458533  | 3.734827695  | 1.392072414 | 0.23805543  | 0.999071534 | Pwmp2a        | Pwmp2a        | PWWP2A        | 7.158363421 | 11.26510844 | 13.26208341 | 14.50086027 | 13.40752513 | 14.91624311 | 10.61330813 | 14.71456236 | 13.51380868 | 17.25476663 |
| ENSMUSG000000066440 | -0.389953257 | 3.54716219   | 1.391898345 | 0.238084776 | 0.999071534 | Zfyve26       | Zfyve26       | ZFYVE26       | 13.75528657 | 16.66050248 | 10.50195437 | 11.10113705 | 16.28523784 | 14.33414582 | 5.630230533 | 12.84933615 | 5.656943167 | 10.91494707 |
| ENSMUSG00000059658  | -0.815468532 | 0.758305939  | 1.391761364 | 0.238107872 | 0.999071534 | Gm16379       | Gm16379       |               | 1.543960738 | 0.592900444 | 2.086926831 | 2.636520049 | 3.400933203 | 0.291048646 | 1.812028217 | 1.796143762 | 0.235705965 | 1.241820326 |
| ENSMUSG00000039523  | -0.308528066 | 4.310968083  | 1.391364269 | 0.238174842 | 0.999071534 | Cep104        | Cep104        | CEP104        | 26.59823271 | 27.5105806  | 19.65750434 | 14.43147816 | 25.83401183 | 25.39399437 | 16.30825396 | 18.8595095  | 10.44963113 | 16.07830527 |
| ENSMUSG000000019301 | 0.923256071  | 0.458577717  | 1.390031801 | 0.238399729 | 0.999071534 | Hsd17b1       | Hsd17b1       | HSD17B1       | 0.701800335 | 1.422961066 | 0.740522424 | 0.277528426 | 1.373453794 | 0.436572969 | 0.129430587 | 3.246875263 | 1.649941757 | 2.091486864 |
| ENSMUSG00000020646  | 0.591444455  | 2.199885087  | 1.38979167  | 0.238440285 | 0.999071534 | Mboat2        | Mboat2        | MBOAT2        | 2.035220973 | 4.743203553 | 4.039213221 | 1.318260024 | 6.54025616  | 2.619437815 | 4.335924663 | 8.497141644 | 4.635550651 | 5.097999231 |
| ENSMUSG00000073236  | 0.6016879    | 1.622378099  | 1.388716371 | 0.238621993 | 0.999071534 | 2500004C02Rik | 2500004C02Rik |               | 1.052700503 | 1.837991377 | 2.221567271 | 3.81601586  | 3.139322957 | 2.692199976 | 3.17104938  | 3.039627905 | 4.871256616 | 2.810435474 |
| ENSMUSG00000030610  | 0.414930692  | 3.177172713  | 1.388582632 | 0.238644605 | 0.999071534 | Det1          | Det1          | DET1          | 5.895122818 | 6.04758453  | 7.741825339 | 8.742145425 | 11.18383803 | 9.168032352 | 10.41916225 | 6.63191543  | 9.742513232 | 12.67963911 |
| ENSMUSG00000051323  | 0.438581312  | 7.274407363  | 1.388519906 | 0.238655211 | 0.999071534 | Pcdh19        | Pcdh19        | PCDH19        | 79.86487817 | 76.60273737 | 185.0632857 | 200.3061416 | 132.5709924 | 114.3821179 | 99.01439902 | 150.0470866 | 247.8055382 | 207.7107892 |
| ENSMUSG000000017499 | 0.472158486  | 4.173532802  | 1.387154155 | 0.238886283 | 0.999071534 | Cdc6          | Cdc6          | CDC6          | 22.10671057 | 10.79078808 | 16.69541464 | 12.6969255  | 15.89282247 | 46.20397257 | 30.99862558 | 5.941090906 | 12.17814154 | 11.37245982 |
| ENSMUSG00000059975  | 0.422845032  | 2.916481815  | 1.386973999 | 0.238916784 | 0.999071534 | Zfp74         | Zfp74         | ZNF569        | 5.614402683 | 6.225454663 | 5.85685917  | 5.273040098 | 10.07199449 | 10.91432423 | 6.600959935 | 6.286503168 | 8.878258026 | 8.300588492 |
| ENSMUSG00000059409  | -0.292818067 | 5.51031379   | 1.386742463 | 0.238955991 | 0.999071534 | Ppp2r5d       | Ppp2r5d       | PPP2R5D       | 58.38978791 | 38.77568904 | 52.57709209 | 47.6655072  | 62.91726426 | 79.09246957 | 35.46398083 | 34.95572091 | 24.27771443 | 32.28732847 |
| ENSMUSG000000026127 | 0.245585533  | 5.636017599  | 1.386559695 | 0.238986945 | 0.999071534 | Imp4          | Imp4          | IMP4          | 52.35430502 | 45.06043375 | 52.24049099 | 40.79667865 | 45.52018287 | 71.52520478 | 59.21449353 | 36.40645241 | 43.44846627 | 52.41788953 |
| ENSMUSG00000020224  | 0.324251943  | 6.847347659  | 1.386390649 | 0.23901558  | 0.999071534 | Llph          | Llph          | LLPH          | 84.28622028 | 76.42486724 | 128.4469804 | 120.5167191 | 118.5748442 | 87.7511668  | 111.4397354 | 113.8478815 | 147.394797  | 136.9270306 |
| ENSMUSG000000015950 | -0.308027216 | 5.172089982  | 1.386116554 | 0.239062017 | 0.999071534 | Ncf1          | Ncf1          | NCF1          | 58.74068807 | 39.96148993 | 33.66011017 | 41.14358918 | 32.96289104 | 60.75640487 | 25.88611739 | 29.01463001 | 17.59937874 | 28.69258542 |
| ENSMUSG00000016526  | 0.413595398  | 3.155287791  | 1.386108763 | 0.239063337 | 0.999071534 | Dyrk3         | Dyrk3         | DYRK3         | 8.281243958 | 7.233385418 | 9.357510628 | 4.579219032 | 9.875786801 | 13.89757285 | 11.13103048 | 8.428059192 | 9.428238612 | 5.882306805 |
| ENSMUSG00000030329  | -0.488009035 | 2.520721102  | 1.38574809  | 0.23912446  | 0.999071534 | Pianp         | Pianp         | PIANP         | 8.491784059 | 7.826285862 | 4.847055865 | 7.215739081 | 5.559217736 | 9.240794513 | 3.106334087 | 5.733843549 | 2.78490998  | 3.202589261 |
| ENSMUSG00000020589  | -0.634461843 | 1.259785099  | 1.385553169 | 0.239157501 | 0.999071534 | Fam49a        | Fam49a        | FAM49A        | 3.158101509 | 2.54947191  | 2.423527932 | 2.497755836 | 3.662543449 | 4.29296753  | 1.617882337 | 0.552659619 | 0.864255206 | 1.764692042 |
| ENSMUSG00000026077  | -1.004893798 | -0.083676926 | 1.385528286 | 0.239161719 | 0.999071534 | Npas2         | Npas2         | NPAS2         | 0.771980369 | 1.422961066 | 1.95228639  | 0.416292639 | 1.046440986 | 0.291048646 | 0.582437641 | 1.243484143 | 0.392843275 | 0           |
| ENSMUSG00000038736  | 0.361110029  | 5.048047604  | 1.385121898 | 0.239230625 | 0.999071534 | Nudcd1        | Nudcd1        | NUDCD1        | 30.66867466 | 37.17485784 | 22.61959403 | 28.03037105 | 31.52403469 | 49.11445903 | 69.05121814 | 26.04408455 | 20.58498764 | 18.82338178 |
| ENSMUSG00000003865  | -0.379158967 | 5.507583567  | 1.384888009 | 0.239270293 | 0.999071534 | Gys1          | Gys1          | GYS1          | 49.89800385 | 92.37388919 | 30.36141937 | 38.50706913 | 56.57321578 | 33.83440511 | 22.71506801 | 66.73364901 | 27.57759794 | 37.90819941 |
| ENSMUSG000000037994 | 0.835711259  | 3.799571795  | 1.383037764 | 0.239584383 | 0.999071534 | Slc9b2        | Slc9b2        | SLC9B2        | 31.86173523 | 2.727342043 | 6.933982695 | 4.02416218  | 6.605658721 | 13.53376204 | 60.24993823 | 2.556050739 | 3.299883514 | 8.300588492 |
| ENSMUSG000000041025 | 0.27833477   | 4.748024175  | 1.382428201 | 0.239687969 | 0.999071534 | Iffo2         | Iffo2         | RP13-279N23.2 | 23.8612114  | 25.85045936 | 25.91828483 | 22.68794884 | 27.27286819 | 47.51369147 | 24.00937388 | 23.34986891 | 25.92765618 | 23.33315033 |
| ENSMUSG00000036372  | 0.298914139  | 6.216261517  | 1.382401742 | 0.239692467 | 0.999071534 | Tmem258       | Tmem258       | TMEM258       | 50.03836392 | 57.03702272 | 76.47577031 | 72.78182977 | 88.62047096 | 54.35333466 | 79.34094981 | 85.10958135 | 75.74018351 | 91.96006306 |
| ENSMUSG00000026176  | -0.25938372  | 6.057854696  | 1.382285122 | 0.239712291 | 0.999071534 | Ctdsp1        | Ctdsp1        | CTDSP1        | 80.63685854 | 81.0494907  | 66.44505748 | 63.41524539 | 85.80816081 | 92.99004243 | 55.84929827 | 58.65100208 | 32.3702859  | 61.69886249 |
| ENSMUSG000000303598 | 0.302461407  | 4.358030399  | 1.382030597 | 0.239755565 | 0.999071534 | Fbxo17        | Fbxo17        | FBXO17        | 23.08923104 | 19.98074497 | 17.23397641 | 14.29271395 | 20.6018069  | 27.35857273 | 28.7983056  | 22.38271458 | 11.62816095 | 20.71879175 |

|                    |              |              |             |             |             |               |               |          |             |             |             |             |             |             |             |             |             |             |
|--------------------|--------------|--------------|-------------|-------------|-------------|---------------|---------------|----------|-------------|-------------|-------------|-------------|-------------|-------------|-------------|-------------|-------------|-------------|
| ENSMUSG00000047248 | 0.404197527  | 3.26850323   | 1.381978135 | 0.239764486 | 0.999071534 | C2cd3         | C2cd3         | C2CD3    | 6.316203019 | 10.13859759 | 5.452937848 | 10.06040545 | 10.39900729 | 15.28005392 | 6.924536402 | 10.29328541 | 9.821081887 | 10.39207536 |
| ENSMUSG00000028683 | 0.27184381   | 5.058143965  | 1.381851231 | 0.239786067 | 0.999071534 | Elf2b3        | Elf2b3        | EIF2B3   | 31.58101509 | 24.90181865 | 39.31500868 | 28.37728158 | 31.91645006 | 39.1460429  | 40.57648901 | 24.80060041 | 35.04162017 | 34.77096912 |
| ENSMUSG00000063445 | 0.368043878  | 3.980269287  | 1.381292222 | 0.239881157 | 0.999071534 | Nmral1        | Nmral1        | NMRAL1   | 13.40438641 | 9.01208675  | 18.91698192 | 9.089055958 | 20.92881971 | 20.15511874 | 18.31442805 | 11.32952219 | 14.61376985 | 21.11094554 |
| ENSMUSG00000033902 | -0.440959498 | 3.00373071   | 1.38124758  | 0.239888753 | 0.999071534 | Mapkbp1       | Mapkbp1       | MAPKBP1  | 9.053224327 | 11.6208487  | 10.70391503 | 7.423885401 | 8.436930446 | 12.15128097 | 5.241938772 | 7.115492597 | 2.357059653 | 6.993409202 |
| ENSMUSG00000054622 | -1.050609467 | -0.242747771 | 1.381174317 | 0.23990122  | 0.999071534 | D730045801Rik | D730045801Rik |          | 0.842160403 | 0.059290044 | 1.548365068 | 1.80393477  | 0.654025616 | 0.582097292 | 0.129430587 | 0.828989429 | 0.078568655 | 0.653589645 |
| ENSMUSG00000026043 | -0.351228889 | 9.976714915  | 1.380867656 | 0.239953409 | 0.999071534 | Col3a1        | Col3a1        | COL3A1   | 894.8656077 | 1840.125818 | 1153.666616 | 1055.509987 | 918.8405879 | 1456.625712 | 1019.913025 | 804.0506634 | 489.089878  | 661.6941566 |
| ENSMUSG00000030138 | -0.276655272 | 5.561879558  | 1.380659054 | 0.239988918 | 0.999071534 | Bms1          | Bms1          | BMS1     | 49.75764378 | 57.45205303 | 58.63591192 | 56.1301242  | 45.32397519 | 78.65589661 | 35.722842   | 29.22187736 | 30.17036356 | 39.47681456 |
| ENSMUSG00000015766 | 0.284037606  | 5.330429877  | 1.38003559  | 0.240095085 | 0.999071534 | Eps8          | Eps8          | EPS8     | 29.96687432 | 25.85045936 | 38.77644692 | 43.15567027 | 49.50973913 | 48.89617254 | 43.61810781 | 32.95232979 | 44.78413341 | 40.78399385 |
| ENSMUSG00000057135 | -0.862052134 | 1.261847023  | 1.379826041 | 0.240130781 | 0.999071534 | Scimp         | Scimp         | SCIIMP   | 5.474042616 | 3.853852886 | 1.279084186 | 1.80393477  | 2.812310149 | 5.093351307 | 1.617882337 | 0.414494714 | 0           | 1.503256184 |
| ENSMUSG00000022587 | -0.428896001 | 9.8016368    | 1.37962005  | 0.240165877 | 0.999071534 | Ly6e          | Ly6e          | LY6E     | 1397.775728 | 1255.17024  | 800.5047401 | 887.3277607 | 994.903767  | 1624.124207 | 1078.156789 | 402.2671203 | 249.219774  | 578.6229128 |
| ENSMUSG00000028232 | 0.348684731  | 4.97261095   | 1.379170331 | 0.240242521 | 0.999071534 | Tmem68        | Tmem68        | TMEM68   | 31.01957483 | 25.85045936 | 26.99540836 | 29.14048475 | 29.75816553 | 34.99859969 | 68.40406521 | 25.07693022 | 22.31349805 | 19.93448417 |
| ENSMUSG00000047996 | -0.315135678 | 4.04675818   | 1.378728004 | 0.240317933 | 0.999071534 | Prrg1         | Prrg1         | PRRG1    | 16.56248792 | 16.24547217 | 19.72482456 | 21.64721724 | 19.88237873 | 16.88082147 | 13.52549634 | 18.58317969 | 9.428238612 | 12.74499808 |
| ENSMUSG00000037754 | 0.455376336  | 2.950505646  | 1.37777447  | 0.2404806   | 0.999071534 | Ppp1r16b      | Ppp1r16b      | PPP1R16B | 6.596923153 | 6.284744707 | 7.405224238 | 6.730064335 | 6.213243352 | 7.931075606 | 4.141778783 | 6.562832977 | 10.29249382 | 12.54892118 |
| ENSMUSG00000097889 | 0.66687704   | 1.661836564  | 1.377481928 | 0.240530533 | 0.999071534 | Gm26541       | Gm26541       |          | 2.526481208 | 1.48225111  | 1.88496617  | 3.122194795 | 3.139322957 | 2.182864846 | 0.841298815 | 3.039627905 | 3.8498641   | 7.581639883 |
| ENSMUSG00000028282 | 0.31086648   | 4.289525184  | 1.377117361 | 0.240592777 | 0.999071534 | Casp8ap2      | Casp8ap2      | CASP8AP2 | 15.93086761 | 12.51019937 | 23.09083558 | 18.38625824 | 19.94778129 | 31.28772945 | 20.19117157 | 15.26722198 | 18.38506529 | 20.19592003 |
| ENSMUSG00000026979 | -0.485990442 | 3.566644777  | 1.376605374 | 0.240680223 | 0.999071534 | Psd4          | Psd4          | PSD4     | 24.84373187 | 24.54607838 | 9.694111729 | 5.897479057 | 11.44544828 | 20.66445387 | 11.26046107 | 5.112101477 | 5.656943167 | 10.06528053 |
| ENSMUSG00000026088 | 0.344477655  | 4.524040522  | 1.376335778 | 0.240726285 | 0.999071534 | Mitd1         | Mitd1         | MITD1    | 21.1241901  | 14.17032061 | 21.94639183 | 26.08767206 | 20.79801459 | 15.57110257 | 23.75051271 | 24.31702324 | 28.67755911 | 27.12397027 |
| ENSMUSG00000037624 | 0.35629907   | 3.49905622   | 1.376323082 | 0.240728454 | 0.999071534 | Kcnk2         | Kcnk2         | KCNK2    | 9.263764428 | 9.308536972 | 9.694111729 | 8.464616999 | 14.32316099 | 12.36956746 | 12.10175988 | 14.507315   | 9.428238612 | 12.09140843 |
| ENSMUSG00000064105 | -0.405875695 | 3.017505032  | 1.375643106 | 0.240844681 | 0.999071534 | Cnnm2         | Cnnm2         | CNNM2    | 12.1411458  | 9.427117061 | 9.492151068 | 8.395234892 | 7.717502268 | 6.985167506 | 5.500799946 | 9.602460883 | 4.399844685 | 6.666614379 |
| ENSMUSG00000027858 | 0.271115959  | 5.739258784  | 1.375266715 | 0.240909046 | 0.999071534 | Tspan2        | Tspan2        | TSPAN2   | 42.10802013 | 38.59781891 | 59.578395   | 57.86467686 | 51.53721854 | 78.43761012 | 69.18064873 | 45.66350103 | 50.0482333  | 40.78399385 |
| ENSMUSG00000023345 | 0.446542028  | 2.891047072  | 1.37510015  | 0.240937536 | 0.999071534 | Poc1a         | Poc1a         | POC1A    | 7.789983723 | 3.320242487 | 5.789538949 | 7.076974868 | 8.044515076 | 12.00575665 | 11.06631518 | 5.250266382 | 5.892649132 | 7.25484506  |
| ENSMUSG00000023333 | 1.312163201  | -0.442208093 | 1.374720261 | 0.24100253  | 0.999071534 | Gcm1          | Gcm1          | GCM1     | 0.280720134 | 0.296450222 | 0.403921322 | 0.763203172 | 0.065402562 | 0.145524323 | 0.064715293 | 0           | 1.728510412 | 2.0261279   |
| ENSMUSG00000020331 | 0.671261288  | 0.940585504  | 1.374455164 | 0.241047897 | 0.999071534 | Hcn2          | Hcn2          | HCN2     | 0.350900168 | 1.304380977 | 2.423527932 | 1.110113705 | 1.962076848 | 2.837724299 | 1.747312924 | 1.519813953 | 1.807079067 | 2.810435474 |
| ENSMUSG00000030214 | -0.324575171 | 4.421862274  | 1.374363794 | 0.241063536 | 0.999071534 | Plbd1         | Plbd1         | PLBD1    | 32.07227533 | 27.27342043 | 24.63920065 | 16.72108768 | 22.89089656 | 23.28389169 | 10.35444696 | 18.30684988 | 14.77090716 | 25.2285603  |
| ENSMUSG00000045064 | -0.574889109 | 1.355301571  | 1.37341792  | 0.241225505 | 0.999071534 | Zc2hc1c       | Zc2hc1c       | ZC2HC1C  | 1.824680872 | 3.320242487 | 3.90457278  | 3.607869541 | 2.289089656 | 1.819054038 | 1.359021163 | 2.279720929 | 1.414235792 | 2.483640651 |
| ENSMUSG00000038836 | 0.50222938   | 2.286399117  | 1.373280867 | 0.241248984 | 0.999071534 | Agbl3         | Agbl3         | AGBL3    | 3.087921476 | 2.786632087 | 5.99149961  | 4.232308499 | 4.251166504 | 4.511254014 | 4.853647011 | 5.388431287 | 7.385453579 | 3.856178906 |
| ENSMUSG00000029221 | -0.233175819 | 6.263764327  | 1.373166921 | 0.241268507 | 0.999071534 | Slc30a9       | Slc30a9       | SLC30A9  | 93.54998471 | 85.79269426 | 79.84178133 | 81.17706466 | 90.38634013 | 85.42277763 | 66.65675228 | 71.98391539 | 55.54803915 | 62.94068282 |
| ENSMUSG00000038729 | 0.367474844  | 6.204692686  | 1.372944453 | 0.24130663  | 0.999071534 | Akap2         | Akap2         | AKAP2    | 34.80929664 | 83.06535221 | 68.06074277 | 74.10008979 | 72.59684337 | 78.36484796 | 33.58723732 | 105.7652346 | 88.78258026 | 85.29344868 |
| ENSMUSG00000046329 | 0.780909102  | 1.08462154   | 1.372731878 | 0.241343063 | 0.999071534 | Slc25a23      | Slc25a23      | SLC25A23 | 2.596661241 | 1.660121243 | 0.673202203 | 1.942698983 | 0.784830739 | 2.255627007 | 0.711868228 | 2.210638477 | 5.421237202 | 0.849666539 |
| ENSMUSG00000074805 | 1.216816879  | -0.445195305 | 1.371971263 | 0.241473482 | 0.999071534 | Gm14047       | l1lbos        |          | 1.614140771 | 0.177870133 | 0.06732022  | 0           | 0.065402562 | 0.363810808 | 0.776583522 | 1.381649048 | 0.471411931 | 1.045743432 |
| ENSMUSG00000038119 | -0.336230197 | 5.042436223  | 1.370714847 | 0.241689101 | 0.999071534 | Cdon          | Cdon          | CDON     | 22.5979708  | 45.89049437 | 25.11044219 | 46.06971875 | 49.9021545  | 29.6869619  | 19.41458804 | 40.4823171  | 22.47063536 | 27.51612406 |
| ENSMUSG00000040652 | -0.266925589 | 7.077697961  | 1.369727659 | 0.241858681 | 0.999071534 | Oaz2          | Oaz2          | OAZ2     | 141.6233077 | 150.893163  | 149.9221307 | 169.29234   | 151.5377352 | 127.5520691 | 126.130107  | 131.2566595 | 85.24699078 | 123.6591608 |
| ENSMUSG00000038446 | 0.263290086  | 5.888794705  | 1.368508285 | 0.242068346 | 0.999071534 | Cdc40         | Cdc40         | CD40     | 50.52962415 | 58.8750141  | 53.65421561 | 43.50258081 | 73.51247923 | 60.53811839 | 66.26846052 | 70.74043125 | 62.38351215 | 47.12381341 |
| ENSMUSG00000042320 | -0.633593769 | 1.004507235  | 1.368188321 | 0.242123399 | 0.999071534 | Prox2         | Prox2         | PROX2    | 2.315941107 | 1.778701332 | 2.356207712 | 3.191576901 | 2.092881971 | 2.328389169 | 0.841298815 | 1.588896405 | 0.471411931 | 2.091486864 |
| ENSMUSG00000032515 | -0.408113615 | 3.978902863  | 1.367821358 | 0.242186557 | 0.999071534 | Csrnp1        | Csrnp1        | CSRNP1   | 25.19463204 | 30.47508283 | 13.53136429 | 12.28063286 | 11.5762534  | 15.06176744 | 11.00159989 | 19.48125158 | 6.206923753 | 14.11753633 |
| ENSMUSG00000024193 | -0.317161325 | 5.136587698  | 1.36781687  | 0.24218733  | 0.999071534 | Phf1          | Phf1          | PHF1     | 39.51135888 | 42.21451162 | 37.49736273 | 39.96409337 | 42.64247016 | 25.9033295  | 17.92613629 | 43.72919237 | 19.79930108 | 42.67940382 |
| ENSMUSG00000072640 | 0.46190087   | 3.069176239  | 1.367724513 | 0.242203229 | 0.999071534 | Lymr9         | Lymr9         | LYRM9    | 4.982782381 | 5.158233863 | 7.472544458 | 10.33793388 | 7.848307392 | 8.003837767 | 7.959981098 | 6.148338263 | 13.67094599 | 8.758101244 |
| ENSMUSG00000036693 | 0.268138336  | 5.348988709  | 1.367016997 | 0.242325067 | 0.999071534 | Nop14         | Nop14         | NOP14    | 36.84451761 | 41.62161117 | 39.78625022 | 32.12391533 | 41.33441893 | 62.64822107 | 29.769035   | 37.37360675 | 46.74834978 | 38.03891734 |
| ENSMUSG00000042155 | 0.579394093  | 2.652897286  | 1.36686345  | 0.242351518 | 0.999071534 | Klhl23        | Klhl23        | KLHL23   | 6.73728322  | 4.683913508 | 5.520258068 | 2.01208109  | 6.932671529 | 11.27813504 | 11.58403753 | 2.003391119 | 2.357059653 | 10.06528053 |

|                    |              |              |             |             |             |               |               |             |             |             |             |             |             |             |             |             |             |             |
|--------------------|--------------|--------------|-------------|-------------|-------------|---------------|---------------|-------------|-------------|-------------|-------------|-------------|-------------|-------------|-------------|-------------|-------------|-------------|
| ENSMUSG00000079681 | 1.455587907  | -0.993274972 | 1.366650669 | 0.24238818  | 0.999071534 | Zglp1         | Zglp1         | ZGLP1       | 0.210540101 | 0.118580089 | 0.403921322 | 0           | 0.327012808 | 1.091432423 | 0.323576467 | 0           | 1.257098482 | 0           |
| ENSMUSG00000022114 | 0.547572877  | 6.370316432  | 1.366564505 | 0.242403027 | 0.999071534 | Spry2         | Spry2         | SPRY2       | 33.6864161  | 50.63369792 | 97.6143195  | 117.4639064 | 43.36189834 | 39.1460429  | 35.52869612 | 64.45392808 | 179.8436515 | 117.3847003 |
| ENSMUSG00000026283 | 0.308688159  | 4.085064861  | 1.364848767 | 0.242698912 | 0.999071534 | Ing5          | Ing5          | ING5        | 12.28150587 | 18.08346354 | 12.92548231 | 17.20676242 | 17.46248395 | 25.9033295  | 20.25588866 | 14.99089217 | 14.61376985 | 15.55543355 |
| ENSMUSG00000026879 | -0.291733857 | 8.230840983  | 1.36460786  | 0.242740493 | 0.999071534 | Gsn           | Gsn           | ALS13122.1  | 329.9163377 | 336.7081622 | 333.03313   | 330.120063  | 387.1177621 | 297.2334298 | 234.4635083 | 260.2335982 | 209.7783091 | 305.4878001 |
| ENSMUSG00000029304 | -0.330978458 | 11.01653247  | 1.36415319  | 0.242818992 | 0.999071534 | Spp1          | Spp1          | SPP1        | 2399.665887 | 3070.98714  | 1917.010594 | 2538.830043 | 2038.99026  | 1261.841405 | 2137.934435 | 1745.851737 | 1544.816897 | 2025.082156 |
| ENSMUSG00000043036 | 0.82493358   | 1.29046958   | 1.363888572 | 0.242864693 | 0.999071534 | Ccdc63        | Ccdc63        | CCDC63      | 1.19306057  | 0.711480533 | 1.817645949 | 4.093544286 | 0.719428178 | 0.509335131 | 0.841298815 | 3.730452429 | 4.635550651 | 3.660102012 |
| ENSMUSG00000068732 | -0.291026188 | 5.321362474  | 1.363106551 | 0.242999814 | 0.999071534 | Tmem167b      | Tmem167b      | TMEM167B    | 38.73937852 | 72.74888449 | 35.54507634 | 30.52812688 | 51.40641341 | 46.13121041 | 35.20511965 | 39.86057503 | 24.51342039 | 29.73832885 |
| ENSMUSG00000014813 | -0.429887586 | 4.602172691  | 1.362979348 | 0.243021801 | 0.999071534 | Stc1          | Stc1          | STC1        | 20.35220973 | 34.32893571 | 34.7372337  | 31.70762269 | 22.10606582 | 8.804221544 | 11.51932224 | 32.95232979 | 24.19914577 | 17.05868974 |
| ENSMUSG00000047250 | -0.271549894 | 5.754487279  | 1.362441927 | 0.243114722 | 0.999071534 | Ptgs1         | Ptgs1         | PTGS1       | 60.70572901 | 67.35349045 | 47.52807556 | 80.5526257  | 47.87467509 | 60.46535622 | 57.85547237 | 33.91948413 | 34.6487769  | 51.96037678 |
| ENSMUSG00000039963 | 0.620431575  | 1.780209773  | 1.362430285 | 0.243116736 | 0.999071534 | Ccdc40        | Ccdc40        | CCDC40      | 3.649361744 | 1.422961066 | 3.702612119 | 1.942698983 | 2.87771271  | 1.309718907 | 2.588611739 | 6.63191543  | 3.771295445 | 4.13691657  |
| ENSMUSG00000027961 | 0.886290706  | 0.366028671  | 1.361873488 | 0.243213054 | 0.999071534 | Lrrc39        | Lrrc39        | LRRC39      | 1.684320805 | 0.177870133 | 1.009803305 | 0.416292639 | 0.981038424 | 0.363810808 | 0.711868228 | 1.72706131  | 1.021392516 | 3.267948225 |
| ENSMUSG00000026739 | 0.246361728  | 6.407424409  | 1.361836356 | 0.243219478 | 0.999071534 | Bmi1          | Bmi1          | BMI1        | 77.05767683 | 72.57101435 | 83.94831477 | 79.65065832 | 89.14369146 | 98.44720454 | 106.4566578 | 77.9250063  | 81.16142072 | 78.88827016 |
| ENSMUSG00000063524 | -0.316160577 | 9.267831786  | 1.361487219 | 0.2432799   | 0.999071534 | Eno1          | Eno1          | ENO1        | 654.0779126 | 761.8770706 | 750.4858164 | 632.8341938 | 753.3067045 | 550.0091789 | 355.5458224 | 662.7079658 | 399.7573171 | 680.7789743 |
| ENSMUSG00000084031 | 0.611435481  | 1.616780505  | 1.361161253 | 0.243336328 | 0.999071534 | Gm7416        | Gm7416        |             | 2.17558104  | 1.778701332 | 1.683005509 | 3.260959008 | 3.139322957 | 1.964578361 | 1.812028217 | 2.556050739 | 4.871256616 | 5.22871716  |
| ENSMUSG00000022945 | 0.34703572   | 3.892818766  | 1.36056437  | 0.243439695 | 0.999071534 | Chaf1b        | Chaf1b        | CHAF1B      | 14.03600671 | 8.834216617 | 15.5509709  | 14.01518552 | 14.78097892 | 28.01343219 | 17.02012219 | 11.19135729 | 12.88525944 | 12.67963911 |
| ENSMUSG00000033805 | 0.430679327  | 3.370406081  | 1.360400241 | 0.243468128 | 0.999071534 | Ephx4         | Ephx4         | EPHX4       | 7.71980369  | 5.929004441 | 11.04051614 | 8.395234892 | 12.0994739  | 7.567264798 | 8.542418739 | 9.049801264 | 12.02100423 | 17.97371524 |
| ENSMUSG00000069835 | -0.602524042 | 1.355040391  | 1.360349045 | 0.243476998 | 0.999071534 | Sat2          | Sat2          | SAT2        | 2.38612114  | 1.956571465 | 4.779735644 | 3.052812688 | 2.943115272 | 1.673529715 | 2.523896446 | 2.901463001 | 1.178529826 | 0.980384468 |
| ENSMUSG00000047910 | -0.46513238  | 2.862311449  | 1.359908242 | 0.243553385 | 0.999071534 | Pcdhb16       | Pcdhb16       | PCDHB13     | 8.421604025 | 15.00038123 | 4.981696305 | 8.811527532 | 5.690022859 | 8.440410737 | 6.342098761 | 6.700997882 | 4.16413872  | 3.790819941 |
| ENSMUSG00000029659 | -0.363765507 | 6.953310991  | 1.358756884 | 0.243753041 | 0.999071534 | Medag         | Medag         | MEDAG       | 110.3931928 | 177.6922631 | 114.1077735 | 146.4656269 | 174.6248395 | 58.57354003 | 81.47655449 | 176.0220887 | 76.44730141 | 119.5415461 |
| ENSMUSG00000042115 | 0.473915583  | 2.77681104   | 1.358557565 | 0.243787625 | 0.999071534 | Klhdc8a       | Klhdc8a       | KLHDC8A     | 8.070703857 | 7.766995817 | 5.183656966 | 2.636520049 | 5.820827982 | 16.00767553 | 6.795105815 | 6.148338263 | 5.264099892 | 5.22871716  |
| ENSMUSG00000089875 | 0.66661048   | 0.972710528  | 1.358146354 | 0.243858993 | 0.999071534 | Etohd2        | Etohd2        |             | 0.701800335 | 0.652190488 | 2.086926831 | 1.80393477  | 2.092881971 | 1.528005392 | 2.006174098 | 2.556050739 | 2.749902928 | 1.699333077 |
| ENSMUSG00000039463 | 0.375797651  | 3.683899129  | 1.357656956 | 0.243943965 | 0.999071534 | Slc9a8        | Slc9a8        | SLC9A8      | 11.9306057  | 13.57742017 | 5.789538949 | 13.59889288 | 12.49188926 | 14.47967014 | 11.97232929 | 10.77686257 | 12.41384751 | 19.47697142 |
| ENSMUSG00000026643 | 0.279852189  | 5.383149245  | 1.357450185 | 0.243979876 | 0.999071534 | Nmt2          | Nmt2          | NMT2        | 30.03705436 | 32.8466846  | 48.33591821 | 41.07420708 | 42.25005479 | 44.8214915  | 34.49325142 | 55.47320927 | 44.23415282 | 38.23499424 |
| ENSMUSG00000020807 | 0.351569002  | 3.762089011  | 1.356796578 | 0.244093435 | 0.999071534 | 4933427D14Rik | 4933427D14Rik | KIAA0753    | 13.89564664 | 11.97658897 | 14.54116759 | 6.591300122 | 14.71557636 | 16.15319986 | 13.59021163 | 15.61263424 | 15.16375043 | 11.50317775 |
| ENSMUSG00000046688 | -0.419682151 | 3.321000676  | 1.356770872 | 0.244097903 | 0.999071534 | Tifa          | Tifa          | TIFA        | 15.79050755 | 12.92522968 | 11.10783636 | 9.85225913  | 9.0255535   | 13.67928637 | 11.51932224 | 5.18118393  | 7.071178959 | 4.182973728 |
| ENSMUSG00000029007 | -0.281852411 | 4.621112411  | 1.356064875 | 0.244220639 | 0.999071534 | Agtrap        | Agtrap        | AGTRAP      | 32.8442557  | 32.37236425 | 24.63920065 | 24.21435519 | 25.63780415 | 27.35857273 | 22.26206096 | 24.80060041 | 17.91365336 | 14.90184391 |
| ENSMUSG00000059256 | -0.708447934 | 7.318301782  | 1.356025364 | 0.24422751  | 0.999071534 | Gzmd          | Gzmd          | GZMH        | 398.9734907 | 377.855453  | 97.74895994 | 120.3779549 | 40.28797794 | 29.17762677 | 25.95083269 | 279.8530146 | 102.5320949 | 120.4565716 |
| ENSMUSG00000029061 | 0.751496345  | 0.955580404  | 1.355845271 | 0.244258832 | 0.999071534 | Mmp23         | Mmp23         | MMP23B      | 2.596661241 | 0.770770577 | 1.144443746 | 1.734552664 | 0.719428178 | 0.9459081   | 5.306654065 | 1.588896405 | 0.707117896 | 2.418281687 |
| ENSMUSG00000053291 | -0.256775387 | 5.383892809  | 1.35512435  | 0.244384265 | 0.999071534 | Rab4b         | Rab4b         | RAB4B-EGLN2 | 45.26612163 | 33.32100496 | 58.77055236 | 47.59612509 | 49.96755706 | 43.07519962 | 37.47015492 | 33.02141224 | 27.49902928 | 43.39835243 |
| ENSMUSG00000079547 | -0.411756243 | 3.923507899  | 1.354561403 | 0.244482266 | 0.999071534 | H2-DMb1       | H2-DMb1       | HLA-DMB     | 24.63319177 | 24.13104807 | 16.42613376 | 8.950291745 | 15.76201734 | 26.63095112 | 8.412988152 | 10.98410993 | 5.735511822 | 14.05217737 |
| ENSMUSG00000035517 | -0.238061249 | 5.285943691  | 1.354025408 | 0.24457562  | 0.999071534 | Tdrd7         | Tdrd7         | TDRD7       | 47.16098254 | 41.26587091 | 45.44114873 | 40.58853233 | 44.14672908 | 49.04169687 | 29.31602795 | 32.67599998 | 29.62038297 | 33.46378983 |
| ENSMUSG00000033576 | 0.464911646  | 3.404415626  | 1.353921621 | 0.244593702 | 0.999071534 | Apol6         | Apol6         | APOL6       | 12.562226   | 9.486407105 | 8.213066882 | 7.701413827 | 7.78290483  | 9.09527019  | 4.206494076 | 10.50053276 | 13.27810271 | 19.93448417 |
| ENSMUSG00000040350 | 0.57121244   | 2.585132337  | 1.352985279 | 0.244756904 | 0.999071534 | Trim7         | Trim7         | TRIM7       | 3.649361744 | 4.091013064 | 5.587578288 | 5.689332737 | 5.428412612 | 1.964578361 | 2.912188207 | 10.36236786 | 7.85686551  | 9.150255031 |
| ENSMUSG00000082585 | -1.998161771 | 2.364316463  | 1.352038948 | 0.244921981 | 0.999071534 | Gm15387       | Gm15387       |             | 11.57970553 | 30.47508283 | 0           | 0           | 0           | 7.203453991 | 3.818202315 | 0           | 0           | 0           |
| ENSMUSG00000038181 | -0.268108218 | 5.789566628  | 1.351854101 | 0.244954242 | 0.999071534 | Chpf2         | Chpf2         | CHPF2       | 69.40805317 | 80.27872013 | 48.60519909 | 60.3624327  | 54.61113893 | 78.2920858  | 44.39469133 | 47.80505706 | 26.32049946 | 53.00612021 |
| ENSMUSG00000036067 | -0.545191418 | 1.76916005   | 1.350881791 | 0.24512402  | 0.999071534 | Slc2a6        | Slc2a6        | SLC2A6      | 6.73728322  | 3.320242487 | 3.433331237 | 4.371072713 | 2.289089656 | 3.638108076 | 3.106334087 | 3.039627905 | 1.492804447 | 1.830051006 |
| ENSMUSG00000037095 | -0.419000116 | 4.402335582  | 1.350400405 | 0.24520813  | 0.999071534 | Lrg1          | Lrg1          | LRG1        | 44.7748614  | 21.10725581 | 22.28299293 | 21.2309246  | 15.82741991 | 25.97609166 | 26.46855503 | 14.02373784 | 4.635550651 | 19.54233039 |
| ENSMUSG00000031925 | 0.419474816  | 3.896102798  | 1.350352803 | 0.245216449 | 0.999071534 | Mam12         | Mam12         | MAML2       | 8.421604025 | 7.707705773 | 20.33070654 | 15.05591712 | 13.66913537 | 18.11777822 | 7.183397576 | 20.93198308 | 16.18514295 | 18.30051006 |
| ENSMUSG00000030103 | -0.44193285  | 6.965170595  | 1.349932285 | 0.245289955 | 0.999071534 | Bhlhe40       | Bhlhe40       | BHLHE40     | 132.9911636 | 275.5801264 | 123.3306437 | 78.4017804  | 141.8581561 | 76.03645879 | 62.45025821 | 217.0570654 | 50.44107657 | 102.5482153 |

|                    |              |              |             |             |             |                |                |          |             |              |             |             |             |             |             |             |             |             |
|--------------------|--------------|--------------|-------------|-------------|-------------|----------------|----------------|----------|-------------|--------------|-------------|-------------|-------------|-------------|-------------|-------------|-------------|-------------|
| ENSMUSG00000089877 | 1.420115839  | 0.11843168   | 1.349570463 | 0.245353223 | 0.999071534 | Gm16102        | Gm16102        |          | 0           | 0.296450222  | 1.211763966 | 1.110113705 | 0.065402562 | 0           | 0           | 1.588896405 | 2.435628308 | 2.287563758 |
| ENSMUSG00000037935 | 0.247842139  | 6.814387098  | 1.349193469 | 0.245419165 | 0.999071534 | Smarce1        | Smarce1        | SMARCE1  | 102.3926689 | 106.5442098  | 115.6561385 | 89.78044587 | 120.3407133 | 132.5726583 | 126.4536835 | 109.8410993 | 104.4963113 | 115.1624955 |
| ENSMUSG00000040204 | 0.409848278  | 6.31559322   | 1.348249956 | 0.245584295 | 0.999071534 | 2810417H13Rik  | 2810417H13Rik  | KIAA0101 | 106.2525708 | 36.5819574   | 67.522181   | 82.77285311 | 60.56277204 | 138.3208691 | 158.2936079 | 32.05425791 | 58.21937343 | 65.29360554 |
| ENSMUSG00000031295 | 0.310548095  | 4.2973631    | 1.347859065 | 0.245652747 | 0.999071534 | Phka2          | Phka2          | PHKA2    | 18.24680872 | 19.98074497  | 17.70521795 | 14.36209606 | 20.53640434 | 21.46483765 | 16.50239984 | 27.2875687  | 12.33527885 | 27.51612406 |
| ENSMUSG00000038047 | 0.285947025  | 4.72766012   | 1.347108764 | 0.245784203 | 0.999071534 | Haus6          | Haus6          | HAUS6    | 32.56353556 | 25.85045936  | 21.60979073 | 15.95788451 | 28.25390661 | 39.65537803 | 30.67504911 | 22.72812684 | 18.30649664 | 31.56837986 |
| ENSMUSG00000047443 | -0.286700424 | 5.307212895  | 1.346694407 | 0.245856837 | 0.999071534 | Fam132b        | Fam132b        | ERFE     | 49.47692365 | 45.59404415  | 64.08884977 | 33.65032168 | 32.7012808  | 41.40166991 | 34.04024437 | 41.10405917 | 18.93504588 | 38.95394284 |
| ENSMUSG00000029283 | 0.320221806  | 4.384686823  | 1.346547827 | 0.245882538 | 0.999071534 | Cdc7           | Cdc7           | CDC7     | 24.63319177 | 14.58535092  | 11.37711724 | 20.32895722 | 25.11458365 | 29.25038893 | 27.69814561 | 22.03730231 | 14.06378926 | 20.261279   |
| ENSMUSG00000058291 | 0.277586994  | 4.84510283   | 1.346225926 | 0.245938991 | 0.999071534 | Zfp68          | Zfp68          |          | 24.70337181 | 29.22999189  | 28.20717232 | 23.86744465 | 28.38471173 | 29.39591325 | 39.54104432 | 32.12334036 | 27.8133039  | 21.1763045  |
| ENSMUSG00000054408 | 0.31181647   | 7.820205651  | 1.34607984  | 0.245964615 | 0.999071534 | Spcs3          | Spcs3          | SPCS3    | 231.7344708 | 185.1035186  | 231.2449569 | 188.0948909 | 211.3156765 | 268.492376  | 375.4134175 | 192.8782071 | 192.3360677 | 184.3122799 |
| ENSMUSG00000042396 | 0.268609882  | 6.223421762  | 1.343608681 | 0.246398571 | 0.999071534 | Rbm7           | Rbm7           | RBM7     | 62.81113002 | 74.46829578  | 76.94701185 | 74.37761822 | 61.67461558 | 64.97661024 | 103.2208931 | 77.85592385 | 74.24737907 | 67.18901551 |
| ENSMUSG00000079165 | 0.623852361  | 2.313397218  | 1.343452693 | 0.246425995 | 0.999071534 | Sap25          | Sap25          | SAP25    | 3.36864161  | 0.948640711  | 1.548365068 | 6.660682229 | 7.128879214 | 5.23887563  | 3.235764674 | 5.388431287 | 5.028393926 | 9.215613995 |
| ENSMUSG00000078768 | 0.497633287  | 2.308989912  | 1.343212847 | 0.24646817  | 0.999071534 | Zfp566         | Zfp566         | ZNF566   | 3.017741442 | 2.54947191   | 4.173853661 | 6.938210655 | 3.858751134 | 5.093351307 | 4.724216424 | 4.490359406 | 6.521198373 | 5.882306805 |
| ENSMUSG00000022973 | -0.369494863 | 3.698592692  | 1.343052179 | 0.246496427 | 0.999071534 | Synj1          | Synj1          | SYNJ1    | 14.10618674 | 18.37991377  | 14.40652715 | 13.66827499 | 14.71557636 | 23.42941601 | 10.61330813 | 9.118883716 | 6.049786443 | 7.777716776 |
| ENSMUSG00000064254 | -0.307569441 | 4.63299367   | 1.342444863 | 0.246603271 | 0.999071534 | Ethe1          | Ethe1          | ETHE1    | 26.52805268 | 25.61329918  | 31.97710466 | 27.26716787 | 30.34678858 | 30.34182135 | 23.10335977 | 28.32380548 | 9.035395336 | 18.82338178 |
| ENSMUSG00000037355 | 0.416457682  | 4.033292296  | 1.342132635 | 0.246658224 | 0.999071534 | Uvssa          | Uvssa          | UVSSA    | 8.000523824 | 12.1544591   | 18.51306059 | 16.79046978 | 16.41604296 | 11.64194584 | 9.254286968 | 25.00784777 | 20.11357571 | 20.58807382 |
| ENSMUSG00000004347 | 0.706037903  | 1.906220207  | 1.342100644 | 0.246663855 | 0.999071534 | Pde1c          | Pde1c          | PDE1C    | 0.421080201 | 1.541541155  | 4.308494102 | 5.897479057 | 1.831271725 | 2.473913492 | 2.523896446 | 5.872008453 | 5.656943167 | 4.248332693 |
| ENSMUSG00000035139 | 0.30588226   | 3.947949628  | 1.341566697 | 0.246757867 | 0.999071534 | Secisbp2       | Secisbp2       | SECISBP2 | 14.80798708 | 16.00831199  | 12.2522801  | 11.37866547 | 16.87386089 | 22.84731872 | 14.49622574 | 15.19813953 | 11.86386692 | 18.62730488 |
| ENSMUSG00000020658 | 1.449030092  | -0.242895761 | 1.341509142 | 0.246768003 | 0.999071534 | Efr3b          | Efr3b          | EFR3B    | 0.771980369 | 0.059290044  | 0.201960661 | 0           | 1.046440986 | 2.110102684 | 0.517722348 | 0           | 2.435628308 | 0           |
| ENSMUSG00000032298 | -0.422751529 | 2.940543993  | 1.34148424  | 0.246772389 | 0.999071534 | Neil1          | Neil1          | NEIL1    | 8.91286426  | 6.04758453   | 9.290190407 | 11.10113705 | 9.287163747 | 7.348978314 | 4.46535525  | 6.770080335 | 7.228316269 | 4.901922338 |
| ENSMUSG00000097585 | -0.678650422 | 0.998524932  | 1.341052793 | 0.246848391 | 0.999071534 | Gm26529        | E230029C05Rik  |          | 1.473780704 | 2.54947191   | 3.164050356 | 2.914048475 | 1.700466601 | 1.309718907 | 0.841298815 | 2.556050739 | 0.31427462  | 1.960768935 |
| ENSMUSG00000086413 | 0.346529133  | 4.624193936  | 1.340761598 | 0.246899703 | 0.999071534 | Gm12415        | Gm12415        |          | 23.51031124 | 14.40748079  | 19.65750434 | 21.2309246  | 33.61691666 | 21.82864846 | 40.51177372 | 16.16529386 | 22.86347863 | 30.13048264 |
| ENSMUSG00000051616 | 1.479899544  | -0.592538356 | 1.340307517 | 0.246979744 | 0.999071534 | C230029F24Rik  | C230029F24Rik  |          | 0.070180034 | 0.118580089  | 0.740522424 | 0.555056852 | 0           | 0.072762162 | 0           | 0.069082452 | 2.042785033 | 1.372538255 |
| ENSMUSG00000041298 | -0.309538505 | 4.185665573  | 1.340032442 | 0.247028247 | 0.999071534 | Katnal1        | Katnal1        | KATNAL1  | 19.65040939 | 24.36820825  | 20.46534698 | 13.87642131 | 25.96481695 | 15.42557824 | 12.8783434  | 18.79042705 | 14.45663254 | 15.55543355 |
| ENSMUSG00000025212 | -0.272735546 | 6.210287608  | 1.339905733 | 0.247050593 | 0.999071534 | Sfxn3          | Sfxn3          | SFXN3    | 69.89931341 | 95.812771176 | 89.40125261 | 77.98548776 | 86.72379668 | 66.72290212 | 42.12965606 | 84.62600418 | 59.47647191 | 67.12365655 |
| ENSMUSG00000021268 | 0.510706533  | 3.213820514  | 1.339503703 | 0.24712151  | 0.999071534 | Meg3           | Meg3           |          | 13.75528657 | 3.853852886  | 7.472544458 | 7.909560147 | 6.213243352 | 9.968416129 | 18.50857394 | 3.730452429 | 6.128355098 | 14.1828953  |
| ENSMUSG00000022360 | 0.292439926  | 6.69861573   | 1.338683848 | 0.247266208 | 0.999071534 | Atad2          | Atad2          | ATAD2    | 95.86592582 | 62.25454663  | 119.8973124 | 94.56781123 | 111.3151598 | 165.7522039 | 135.837401  | 80.55013949 | 94.75379805 | 83.33267974 |
| ENSMUSG00000075028 | -0.492672482 | 2.825216267  | 1.337916289 | 0.247401769 | 0.999071534 | Prdm11         | Prdm11         | PRDM11   | 7.298723488 | 5.573264174  | 12.45424076 | 10.89299073 | 5.624620297 | 5.166113468 | 3.17104938  | 3.937699786 | 5.735511822 | 9.477049853 |
| ENSMUSG00000019809 | 0.293352646  | 4.755978245  | 1.337876834 | 0.24740874  | 0.999071534 | Pex3           | Pex3           | PEX3     | 25.12445201 | 28.044191    | 20.12874588 | 23.86744465 | 28.45011429 | 24.44808627 | 43.87696898 | 27.70206341 | 21.37067419 | 25.03248341 |
| ENSMUSG00000022425 | -0.430963234 | 3.932425814  | 1.337490924 | 0.247476934 | 0.999071534 | Enpp2          | Enpp2          | ENPP2    | 13.40438641 | 32.3130742   | 15.41633046 | 19.28822562 | 9.41796887  | 8.804221544 | 8.607134033 | 19.55033403 | 11.94243557 | 11.76461361 |
| ENSMUSG00000037266 | 0.358758115  | 8.395243429  | 1.337213928 | 0.247525896 | 0.999071534 | D4Wsu53e       | Rsrp1          | RSRP1    | 321.4947337 | 213.9777703  | 337.1396635 | 316.5211701 | 340.3549305 | 274.9682084 | 205.0180497 | 458.5002365 | 337.8452169 | 512.3489228 |
| ENSMUSG00000021952 | 0.456842612  | 3.356999387  | 1.336973294 | 0.24756844  | 0.999071534 | Xpo4           | Xpo4           | XPO4     | 11.01826527 | 11.38368853  | 7.943786    | 7.285121188 | 6.736463844 | 21.31931333 | 11.77818341 | 3.868617334 | 13.27810271 | 7.25484506  |
| ENSMUSG00000011306 | -0.266259429 | 4.71495857   | 1.336735881 | 0.247610423 | 0.999071534 | Sugp1          | Sugp1          | SUGP1    | 29.33525402 | 28.39993127  | 28.67841387 | 32.74835429 | 28.64632198 | 31.28772945 | 18.44385864 | 25.14601267 | 15.55659371 | 25.94750891 |
| ENSMUSG00000000318 | -0.474373171 | 3.485503376  | 1.336289817 | 0.247689328 | 0.999071534 | Clec10a        | Clec10a        |          | 21.68563036 | 11.44297857  | 8.751628644 | 12.6969255  | 12.4264867  | 18.3360647  | 12.03704459 | 3.45412262  | 3.457020824 | 10.1306395  |
| ENSMUSG00000046442 | 1.245346952  | -0.503126892 | 1.336236208 | 0.247698813 | 0.999071534 | Ppm1e          | Ppm1e          | PPM1E    | 0.140360067 | 0            | 1.144443746 | 0.138764213 | 0.39241537  | 0.436572969 | 1.229590576 | 0.138164905 | 1.807079067 | 0.130717929 |
| ENSMUSG00000031347 | 0.289729445  | 6.302295321  | 1.336184018 | 0.247708047 | 0.999071534 | Cetn2          | Cetn2          | CETN2    | 78.60163757 | 56.44412228  | 63.8868891  | 95.88607125 | 71.3541947  | 68.32366967 | 112.2163189 | 64.8684228  | 80.37573417 | 86.40455108 |
| ENSMUSG00000030122 | -0.366899869 | 9.442876772  | 1.336040854 | 0.24773338  | 0.999071534 | Ptms           | Ptms           | PTMS     | 702.0810556 | 487.8977754  | 1121.689511 | 1005.901781 | 724.2679671 | 694.1510209 | 320.2759874 | 550.3798982 | 551.5519588 | 810.0590061 |
| ENSMUSG00000028587 | 0.476540758  | 3.044411094  | 1.335919324 | 0.247754888 | 0.999071534 | Orc1           | Orc1           | ORC1     | 11.22880537 | 4.683913508  | 6.732022034 | 4.926129565 | 7.913709953 | 13.31547556 | 14.43151045 | 3.315957715 | 7.935434165 | 7.385562989 |
| ENSMUSG00000069893 | -1.211355731 | -0.439636976 | 1.335670688 | 0.247798896 | 0.999071534 | 9930111J21Rik1 | 9930111J21Rik1 |          | 0.421080201 | 1.719411288  | 0.471241542 | 0.277528426 | 1.438856355 | 1.018670261 | 0.064715293 | 0           | 0           | 0.784307574 |
| ENSMUSG00000030587 | 0.380610773  | 4.68181177   | 1.334729807 | 0.24796552  | 0.999071534 | 2200002D01Rik  | 2200002D01Rik  |          | 22.52779077 | 16.77908257  | 23.69671756 | 27.82222473 | 23.87193498 | 11.42365936 | 22.90921389 | 31.01802112 | 34.72734555 | 32.81020018 |

|                     |              |              |             |             |             |               |           |              |             |             |             |             |             |             |             |             |             |             |
|---------------------|--------------|--------------|-------------|-------------|-------------|---------------|-----------|--------------|-------------|-------------|-------------|-------------|-------------|-------------|-------------|-------------|-------------|-------------|
| ENSMUSG00000026073  | -0.496166923 | 3.514948158  | 1.334437927 | 0.248017238 | 0.999071534 | Iltr2         | Iltr2     | IL1R2        | 25.26481208 | 21.04796576 | 7.87646578  | 9.297202278 | 5.559217736 | 8.222124252 | 15.79053161 | 6.63191543  | 5.264099892 | 9.673126747 |
| ENSMUSG00000028961  | -0.296837692 | 7.299774967  | 1.334382874 | 0.248026994 | 0.999071534 | Pgd           | Pgd       | PGD          | 199.1709352 | 182.0797264 | 179.6103479 | 153.8201302 | 188.5555851 | 244.626387  | 132.2133446 | 112.5353149 | 73.46169252 | 147.9073367 |
| ENSMUSG00000018171  | 0.362129606  | 8.942920861  | 1.334277199 | 0.248045723 | 0.999071534 | Vmp1          | Vmp1      | VMP1         | 447.818794  | 322.8935818 | 554.3146943 | 476.030633  | 428.1905708 | 281.2985164 | 483.0996658 | 650.7567016 | 579.5224    | 580.7143996 |
| ENSMUSG00000059456  | -0.267894725 | 5.719508467  | 1.334115913 | 0.24807431  | 0.999071534 | Ptk2b         | Ptk2b     | PTK2B        | 66.5306718  | 78.50001879 | 53.58689539 | 41.90679236 | 59.12391568 | 70.43377235 | 37.59958551 | 53.12440589 | 26.71334273 | 48.62706959 |
| ENSMUSG00000040697  | -0.357825143 | 3.762962735  | 1.333115514 | 0.24825172  | 0.999071534 | Dnajc16       | Dnajc16   | DNAIC16      | 19.72058943 | 17.13482283 | 17.63789773 | 9.713494917 | 14.6501738  | 19.71854577 | 14.04321869 | 8.428059192 | 6.285492408 | 10.58815225 |
| ENSMUSG00000028479  | -0.383034931 | 3.94830137   | 1.332804824 | 0.248306849 | 0.999071534 | Gne           | Gne       | GNE          | 18.80824899 | 24.19033812 | 10.97319592 | 11.93372233 | 24.72216828 | 24.08427546 | 12.68419752 | 12.22759407 | 5.421237202 | 12.81035704 |
| ENSMUSG00000081684  | -1.462321593 | 0.967862052  | 1.332761063 | 0.248314615 | 0.999071534 | Rps2-ps13     | Rps2-ps13 |              | 0           | 1.837991377 | 0           | 2.22022741  | 9.875786801 | 1.746291877 | 0.647152935 | 2.486968286 | 0           | 0           |
| ENSMUSG00000038831  | -0.521637496 | 2.264767191  | 1.332478742 | 0.248364725 | 0.999071534 | Ralgps1       | Ralgps1   | RALGPS1      | 4.000261912 | 9.901437416 | 3.567971678 | 6.660682229 | 4.316569065 | 7.712789121 | 2.459181152 | 3.868617334 | 2.435628308 | 2.810435474 |
| ENSMUSG00000003680  | -0.240731996 | 5.176492576  | 1.332470214 | 0.248366239 | 0.999071534 | Taf6l         | Taf6l     | TAF6L        | 38.45865838 | 37.05627775 | 40.52677265 | 42.18432078 | 44.21213164 | 37.2542267  | 36.17584905 | 32.12334036 | 21.76351746 | 33.72522568 |
| ENSMUSG00000049404  | -0.64375201  | 1.169921333  | 1.331243728 | 0.248584078 | 0.999071534 | Rarres1       | Rarres1   | RARRES1      | 3.36864161  | 1.897281421 | 2.01960661  | 3.81601586  | 2.223687094 | 0.9459081   | 1.164875283 | 0.828989429 | 2.514196963 | 2.156845829 |
| ENSMUSG00000028165  | 0.287841948  | 5.935221387  | 1.330851497 | 0.248653792 | 0.999071534 | Cisd2         | Cisd2     | CISD2        | 59.72320854 | 49.56647712 | 57.76074905 | 65.84361911 | 51.6026211  | 66.43185347 | 105.8095048 | 42.41662577 | 54.05523471 | 55.55511983 |
| ENSMUSG00000004383  | -0.319418949 | 4.892321421  | 1.330807717 | 0.248661575 | 0.999071534 | Large         | Large     | LARGE1       | 30.66867466 | 55.1397413  | 26.65880726 | 23.10424148 | 35.77520119 | 39.21880506 | 32.29293145 | 25.8368372  | 13.19953406 | 20.52271485 |
| ENSMUSG00000023938  | 0.427461726  | 2.788653102  | 1.330644393 | 0.248690612 | 0.999071534 | Aars2         | Aars2     | AARS2        | 4.702062247 | 5.395394041 | 7.270583797 | 6.175007483 | 6.409451036 | 9.240794513 | 4.724216424 | 6.562832977 | 5.971217787 | 11.30710086 |
| ENSMUSG00000022488  | -0.295711217 | 6.951810288  | 1.330560364 | 0.248705553 | 0.999071534 | Nckap1l       | Nckap1l   | NCKAP1L      | 140.3600671 | 195.3606963 | 128.1103793 | 97.96753445 | 149.4448532 | 174.8474741 | 103.1561778 | 116.4039323 | 55.6260781  | 104.7704201 |
| ENSMUSG00000003355  | 0.319689567  | 5.128684396  | 1.330401689 | 0.24873377  | 0.999071534 | Fkbp11        | Fkbp11    | FKBP11       | 33.75659613 | 21.28512594 | 39.3823289  | 38.99274388 | 26.68424513 | 28.45000516 | 50.67207479 | 28.32380548 | 40.85570065 | 34.18273844 |
| ENSMUSG000000069270 | 1.911889746  | -0.776104123 | 1.32849523  | 0.249073094 | 0.999071534 | Hist1h2ac     | Hist1h2ac |              | 0           | 1.007930755 | 0           | 0           | 0           | 0           | 1.423736457 | 0.27632981  | 1.571373102 | 0           |
| ENSMUSG00000046879  | -0.298684141 | 5.724850805  | 1.328458475 | 0.249079642 | 0.999071534 | Irgm1         | Irgm1     | IRGM         | 56.21420687 | 58.8750141  | 60.38623765 | 58.41973371 | 68.28027431 | 62.06612378 | 20.12645627 | 59.41090906 | 36.06301269 | 52.74468436 |
| ENSMUSG000000031970 | -0.705134025 | 0.570460515  | 1.327937059 | 0.249172549 | 0.999071534 | Dbndd1        | Dbndd1    | DBNDD1       | 2.456301174 | 1.660121243 | 0.875162864 | 1.873316877 | 1.831271725 | 0.436572969 | 0.711868228 | 1.588896405 | 0.942823861 | 1.111102397 |
| ENSMUSG000000041353 | 0.321326918  | 4.823881723  | 1.327373633 | 0.249272989 | 0.999071534 | Tmem29        | Tmem29    | FAM156B      | 30.80903472 | 23.83459785 | 31.37122268 | 22.68794884 | 21.51744277 | 20.73721603 | 50.67207479 | 27.01123889 | 22.54920401 | 28.82330335 |
| ENSMUSG00000025505  | 0.398857617  | 3.468852107  | 1.327222534 | 0.249299933 | 0.999071534 | Tmem80        | Tmem80    | TMEM80       | 8.632144126 | 8.300606217 | 10.50195437 | 10.89299073 | 10.52981242 | 9.822891806 | 7.053966989 | 10.77686257 | 14.37806388 | 16.40510009 |
| ENSMUSG00000005718  | 0.372806159  | 3.529479211  | 1.327138617 | 0.249314899 | 0.999071534 | Tfap4         | Tfap4     | TFAP4        | 7.439083555 | 8.241316173 | 15.28169002 | 7.354503294 | 13.47292769 | 16.88082147 | 12.68419752 | 10.36236786 | 11.07818037 | 11.69925465 |
| ENSMUSG00000044952  | -0.668548493 | 1.652230172  | 1.326746201 | 0.249384898 | 0.999071534 | Kctd21        | Kctd21    | KCTD21       | 2.456301174 | 0.491013064 | 0.875162864 | 5.134275885 | 6.54025616  | 3.274297269 | 2.847472913 | 3.246875263 | 0.471411931 | 1.764692042 |
| ENSMUSG00000020388  | -0.556495929 | 2.210748747  | 1.326369929 | 0.249452039 | 0.999071534 | Pdlim4        | Pdlim4    | PDLIM4       | 7.088183388 | 5.632554219 | 4.039213221 | 6.730064335 | 4.185763942 | 9.604605321 | 3.494625848 | 2.210638477 | 1.099961171 | 2.61435858  |
| ENSMUSG000000034317 | 0.297411718  | 7.031157223  | 1.3258993   | 0.249536049 | 0.999071534 | Trim59        | Trim59    | RP11-432B6.3 | 106.8140111 | 78.73717897 | 129.7260646 | 152.2937239 | 138.0648075 | 150.1083392 | 146.8390009 | 115.7821902 | 146.6876791 | 128.6918011 |
| ENSMUSG000000064127 | 0.270483289  | 5.983542693  | 1.325196988 | 0.249661479 | 0.999071534 | Med14         | Med14     | MED14        | 55.8633067  | 51.87878886 | 56.27970421 | 63.06833485 | 69.71913066 | 85.56830195 | 64.26228642 | 49.39395346 | 79.90432223 | 50.97999231 |
| ENSMUSG000000029447 | 0.342646966  | 8.808171938  | 1.325093052 | 0.249680048 | 0.999071534 | Cct6a         | Cct6a     |              | 551.7554237 | 341.5106558 | 382.5808122 | 405.3302665 | 371.0287319 | 506.6429307 | 811.6592108 | 302.2357292 | 394.100374  | 411.1078867 |
| ENSMUSG00000019718  | 0.326863032  | 4.848046506  | 1.32403735  | 0.249868756 | 0.999071534 | L3hypdh       | L3hypdh   | L3HYPDH      | 20.21184966 | 18.14275359 | 31.775144   | 31.56885848 | 29.69276296 | 23.93875114 | 30.15732676 | 24.3861057  | 39.3628962  | 31.17622607 |
| ENSMUSG00000028860  | 0.989534701  | -0.331437478 | 1.323686354 | 0.249931535 | 0.999071534 | Sytl1         | Sytl1     | SYTL1        | 0.070180034 | 0.652190488 | 0.403921322 | 0.555056852 | 0.588623054 | 0.800383777 | 0.129430587 | 1.036236786 | 0.31427462  | 2.0261279   |
| ENSMUSG00000040620  | 0.26424335   | 4.820668595  | 1.322885176 | 0.250074907 | 0.999071534 | Dhx33         | Dhx33     | DHX33        | 27.79129328 | 28.28135118 | 29.68821717 | 19.70451826 | 27.66528356 | 43.8755834  | 26.33912445 | 24.10977589 | 27.8133039  | 27.58148302 |
| ENSMUSG00000033752  | 0.397272962  | 3.7241647    | 1.322632191 | 0.250120201 | 0.999071534 | Mnd1          | Mnd1      | MND1         | 9.333944461 | 6.581194929 | 17.70521795 | 14.22333184 | 10.39900729 | 14.1886215  | 13.26663516 | 10.29328541 | 18.69933991 | 13.59466462 |
| ENSMUSG00000039990  | 0.307729     | 4.001833701  | 1.322207456 | 0.250196265 | 0.999071534 | 2700050L05Rik | Edrf1     | EDRF1        | 13.82546661 | 16.24547217 | 15.14704958 | 14.43147816 | 13.99614818 | 20.37340523 | 16.69654572 | 11.95126426 | 17.12796681 | 18.49658695 |
| ENSMUSG000000006362 | -0.648069741 | 1.131556211  | 1.322070637 | 0.250220774 | 0.999071534 | Cbfa2t3       | Cbfa2t3   | CBFA2T3      | 1.684320805 | 2.253021687 | 3.433331237 | 1.942698983 | 3.727946011 | 3.710870238 | 0.517722348 | 1.381649048 | 0.785686551 | 1.764692042 |
| ENSMUSG00000018666  | 0.328074448  | 7.341079966  | 1.321830787 | 0.250263746 | 0.999071534 | Cbx1          | Cbx1      | CBX1         | 131.0261226 | 110.9316731 | 207.6828798 | 143.898489  | 151.0145147 | 139.7033501 | 151.2396409 | 179.3380464 | 217.7173433 | 154.1164383 |
| ENSMUSG000000057278 | 0.355122045  | 7.084696351  | 1.321716798 | 0.250284171 | 0.999071534 | Snrpg         | Snrpg     | SNRPG        | 156.0102146 | 75.06119622 | 142.6515469 | 148.477708  | 92.61002722 | 96.70091266 | 179.1319324 | 114.9532008 | 175.6009441 | 144.1818757 |
| ENSMUSG00000048402  | -0.434619482 | 3.041256253  | 1.321295016 | 0.250359768 | 0.999071534 | Gli2          | Gli2      | GLI2         | 6.246022985 | 11.02794826 | 11.78103856 | 7.63203172  | 11.70705853 | 9.459080998 | 3.235764674 | 8.220811835 | 4.399844685 | 8.496665386 |
| ENSMUSG000000050199 | 0.367563772  | 3.425625366  | 1.320833933 | 0.250442441 | 0.999071534 | Lgr4          | Lgr4      | LGR4         | 6.807463254 | 10.25717768 | 12.99280253 | 8.880909638 | 9.090956062 | 10.91432423 | 11.13103048 | 13.12566595 | 11.39245499 | 10.39207536 |
| ENSMUSG00000021716  | 0.36732671   | 6.041168591  | 1.320458661 | 0.250509752 | 0.999071534 | Srek1ip1      | Srek1ip1  | SREK1IP1     | 42.59928036 | 32.49094434 | 79.1012589  | 77.98548776 | 63.57128987 | 44.45768069 | 52.74296419 | 75.1617082  | 92.47530705 | 77.64644983 |
| ENSMUSG000000036120 | -0.316687631 | 3.610874856  | 1.320080146 | 0.250577668 | 0.999071534 | Rfxank        | Rfxank    | RFXANK       | 14.17636678 | 12.86593964 | 14.81044848 | 13.11321814 | 14.6501738  | 11.93299449 | 11.51932224 | 10.0169556  | 7.6997282   | 11.11102397 |
| ENSMUSG000000073489 | 0.278753278  | 4.882192709  | 1.319848887 | 0.250619173 | 0.999071534 | Ifi204        | Ifi204    | MNDA         | 26.45787265 | 36.10763704 | 21.20586941 | 24.3531194  | 29.88897065 | 27.28581057 | 32.68122321 | 39.30791541 | 26.16336215 | 28.3657906  |

|                     |              |              |             |             |             |               |               |          |             |             |             |             |             |             |             |             |             |             |
|---------------------|--------------|--------------|-------------|-------------|-------------|---------------|---------------|----------|-------------|-------------|-------------|-------------|-------------|-------------|-------------|-------------|-------------|-------------|
| ENSMUSG00000051978  | 0.378154993  | 3.298303211  | 1.318534749 | 0.250855187 | 0.999071534 | Erich1        | Erich1        | ERIC1    | 8.421604025 | 8.241316173 | 6.530061373 | 9.85225913  | 10.7260201  | 7.858313444 | 11.26046107 | 11.88218181 | 8.878258026 | 12.35284429 |
| ENSMUSG00000036887  | -0.480646531 | 8.012625788  | 1.318203265 | 0.250914763 | 0.999071534 | C1qa          | C1qa          | C1QA     | 430.0632455 | 333.5657898 | 227.6769852 | 290.2947338 | 282.996884  | 499.148428  | 355.4811071 | 88.70186887 | 58.45507939 | 123.9859557 |
| ENSMUSG00000093904  | 0.337563353  | 8.398591037  | 1.318120202 | 0.250929695 | 0.999071534 | Tomm20        | Tomm20        | TOMM20   | 351.8826882 | 259.038204  | 309.807654  | 362.1052141 | 258.6671311 | 276.7145003 | 549.950564  | 284.9651161 | 363.4585985 | 308.8864662 |
| ENSMUSG00000019837  | 0.261719356  | 5.377404213  | 1.317788895 | 0.250989261 | 0.999071534 | Gtf3c6        | Gtf3c6        | GTF3C6   | 34.9496567  | 33.20242487 | 40.99801419 | 38.78459756 | 47.6784674  | 38.63670777 | 52.54881831 | 34.26489639 | 39.99144544 | 50.4571206  |
| ENSMUSG00000029270  | 0.274233267  | 4.936192181  | 1.317284161 | 0.251080041 | 0.999071534 | Fam69a        | Fam69a        | FAM69A   | 25.61571224 | 33.14313482 | 23.76403778 | 30.31998056 | 30.28138602 | 40.96509694 | 47.24216424 | 25.69867229 | 23.0991846  | 26.40502166 |
| ENSMUSG00000048351  | 0.354738331  | 3.377892579  | 1.317040937 | 0.251123801 | 0.999071534 | Selrc1        | Coa7          | COA7     | 8.000523824 | 7.707705773 | 10.63659481 | 9.921641237 | 10.39900729 | 12.36956746 | 10.67802342 | 9.049801264 | 11.31388633 | 11.82997258 |
| ENSMUSG00000055835  | 0.441056615  | 3.270092184  | 1.316808513 | 0.251165627 | 0.999071534 | Zfp1          | Zfp1          | ZFP1     | 4.140621979 | 6.166164618 | 9.492151068 | 12.83568971 | 8.829345815 | 8.513172898 | 7.506974044 | 13.19474841 | 10.52819978 | 12.09140843 |
| ENSMUSG00000029610  | 0.25220381   | 6.003576359  | 1.316561801 | 0.251210033 | 0.999071534 | Aimp2         | Aimp2         | AIMP2    | 69.26769311 | 52.59026939 | 63.75224866 | 54.25680732 | 64.0291078  | 72.6166372  | 93.12530732 | 50.01569553 | 56.33372571 | 64.443939   |
| ENSMUSG00000048826  | -0.534839413 | 2.870819496  | 1.316498554 | 0.251221419 | 0.999071534 | Dact2         | Dact2         | DACT2    | 11.0884453  | 7.411255551 | 3.366011017 | 7.909560147 | 14.58477124 | 7.130691829 | 4.141778783 | 7.944482025 | 1.414235792 | 8.496665386 |
| ENSMUSG00000019768  | 0.546262017  | 1.41832679   | 1.315763492 | 0.251353789 | 0.999071534 | Esr1          | Esr1          | ESR1     | 1.263240604 | 2.01586151  | 2.423527932 | 2.01208109  | 3.008517833 | 4.220205368 | 1.941458804 | 3.385040167 | 2.671334273 | 2.483640651 |
| ENSMUSG00000028228  | 0.266997419  | 5.88084227   | 1.315507616 | 0.251399887 | 0.999071534 | Cpne3         | Cpne3         | CPNE3    | 42.59928036 | 74.17184555 | 60.79015897 | 37.74386596 | 62.91726426 | 70.43377235 | 58.69677119 | 79.79023251 | 49.81252733 | 51.56822299 |
| ENSMUSG00000002881  | 0.248569242  | 6.288017678  | 1.315034734 | 0.251485109 | 0.999071534 | Nab1          | Nab1          | NAB1     | 77.75947716 | 93.79685025 | 62.47316448 | 58.55849793 | 79.00629441 | 97.35577212 | 90.40726499 | 94.50479487 | 61.75496291 | 67.5811693  |
| ENSMUSG00000091649  | -0.488978069 | 2.09541733   | 1.314617807 | 0.251560275 | 0.999071534 | Phf11b        | Phf11b        | PHF11    | 5.052962415 | 4.387463286 | 6.664701814 | 3.330341114 | 5.75542542  | 6.330308052 | 3.753487022 | 2.141556024 | 1.885647722 | 3.202589261 |
| ENSMUSG00000031103  | -0.331395329 | 5.153135228  | 1.313935755 | 0.2516833   | 0.999071534 | Elf4          | Elf4          | ELF4     | 46.52936224 | 53.65749019 | 38.03592449 | 25.04694046 | 43.23109321 | 59.22839948 | 23.87994329 | 28.94554755 | 12.17814154 | 35.3591998  |
| ENSMUSG00000097243  | 0.926369117  | 0.070897612  | 1.313904188 | 0.251688996 | 0.999071534 | Gm26908       | Gm26908       |          | 1.543960738 | 0.118580089 | 0.942483085 | 0.069382107 | 0.654025616 | 0.873145938 | 1.229590576 | 1.312566595 | 0.471411931 | 1.960768935 |
| ENSMUSG00000031289  | 0.468682172  | 4.009555229  | 1.31362072  | 0.251740149 | 0.999071534 | Il13ra2       | Il13ra2       | IL13RA2  | 12.07096577 | 27.03626025 | 13.12744297 | 6.938210655 | 10.85682522 | 6.039259406 | 24.07408917 | 20.93198308 | 18.46363395 | 16.60117698 |
| ENSMUSG00000034118  | -0.298600532 | 5.304690006  | 1.312900305 | 0.25187021  | 0.999071534 | Tpst1         | Tpst1         | TPST1    | 56.2843869  | 39.13142931 | 35.0738348  | 47.45736088 | 47.74386997 | 64.24898862 | 42.32380194 | 23.0735391  | 18.85647722 | 29.80368781 |
| ENSMUSG00000028278  | -0.967660577 | -0.135899379 | 1.312628582 | 0.251919287 | 0.999071534 | Rragd         | Rragd         | RRAGD    | 1.052700503 | 2.253021687 | 0.471214542 | 0.485674746 | 1.046440986 | 0.363810808 | 0.647152935 | 1.174401691 | 0           | 0.326794823 |
| ENSMUSG00000038180  | 0.705510677  | 0.498845197  | 1.311937248 | 0.252044205 | 0.999071534 | Spag4         | Spag4         | SPAG4    | 1.052700503 | 0.770770577 | 0.336601102 | 0.901967385 | 2.027479409 | 1.746291877 | 1.48845175  | 2.003391119 | 1.335667137 | 1.111102397 |
| ENSMUSG00000092060  | -0.667245562 | 0.914266345  | 1.311706257 | 0.25208596  | 0.999071534 | Bend4         | Bend4         | BEND4    | 3.930081878 | 2.608761954 | 1.481044848 | 1.595788451 | 1.569661478 | 2.546675653 | 2.006174098 | 1.105319238 | 0.392843275 | 0.784307574 |
| ENSMUSG00000094111  | 2.352947506  | 0.040012992  | 1.311452014 | 0.252131929 | 0.999071534 | Gm10349       | Nutf2-ps2     |          | 0           | 1.48225111  | 0           | 0           | 0           | 0           | 7.24811287  | 0           | 0           | 0           |
| ENSMUSG00000035495  | 0.256512126  | 4.826754592  | 1.311357117 | 0.252149089 | 0.999071534 | Tstd2         | Tstd2         | TSTD2    | 23.6506713  | 30.06005251 | 26.45684659 | 23.3123878  | 30.34678858 | 35.43517266 | 31.51634792 | 30.25811415 | 27.73473525 | 23.33315033 |
| ENSMUSG00000056412  | -0.31184819  | 4.7751022    | 1.309973952 | 0.252399372 | 0.999071534 | Gm12396       | Gm12396       |          | 22.66815083 | 28.34064123 | 30.36141937 | 42.18432078 | 32.04725518 | 18.40882687 | 24.13880447 | 31.7779281  | 15.55659371 | 26.79717545 |
| ENSMUSG00000041343  | -0.547729698 | 1.631354688  | 1.309886218 | 0.252415257 | 0.999071534 | Ankrd42       | Ankrd42       | ANKRD42  | 3.36864161  | 3.913142931 | 2.894769475 | 3.399723221 | 4.708984435 | 3.128772945 | 2.588611739 | 3.45412262  | 1.649941757 | 0.915025503 |
| ENSMUSG00000073910  | -0.450429827 | 3.303663782  | 1.3089189   | 0.252590488 | 0.999071534 | Mob3b         | Mob3b         | MOB3B    | 5.403862583 | 10.90936817 | 11.78103856 | 12.83568971 | 17.33167882 | 9.09527019  | 3.559341141 | 9.80970824  | 5.578374512 | 11.89533154 |
| ENSMUSG00000039157  | -0.396601199 | 3.98663982   | 1.308396604 | 0.252685164 | 0.999071534 | Fam102a       | Fam102a       | FAM102A  | 25.40517214 | 18.0241735  | 17.03201575 | 13.39074656 | 19.42456079 | 21.02826468 | 14.36679515 | 9.395213526 | 3.771295445 | 19.99984314 |
| ENSMUSG00000068290  | -0.260273657 | 5.523036277  | 1.308236092 | 0.252714269 | 0.999071534 | Ddrgrk1       | Ddrgrk1       | DDRKG1   | 46.038102   | 62.07667649 | 46.92219358 | 52.86916519 | 51.34101085 | 51.07903739 | 38.76446079 | 52.84807608 | 21.68494881 | 40.78399385 |
| ENSMUSG00000037172  | -0.561036689 | 1.857873705  | 1.308001569 | 0.252756801 | 0.999071534 | E330009J07Rik | E330009J07Rik | KIAA1147 | 4.070441945 | 6.759065062 | 4.645095204 | 3.607869541 | 2.485297341 | 3.419821592 | 2.588611739 | 5.043019025 | 1.257098482 | 1.503256184 |
| ENSMUSG00000033486  | 0.595669513  | 1.758389073  | 1.307638528 | 0.252822658 | 0.999071534 | Catsper2      | Catsper2      | CATSPER2 | 1.473780704 | 2.01586151  | 2.625488593 | 4.509836926 | 2.681505025 | 2.037340523 | 1.941458804 | 5.319348834 | 4.085570065 | 4.901922338 |
| ENSMUSG00000049307  | -0.341546391 | 3.855243782  | 1.307573335 | 0.252834487 | 0.999071534 | Fut4          | Fut4          | FUT4     | 16.49230788 | 16.36405226 | 16.29149332 | 17.9699656  | 15.95822503 | 23.72046466 | 12.03704459 | 8.289894287 | 7.071178959 | 12.67963911 |
| ENSMUSG00000012609  | -0.336935741 | 3.813715008  | 1.306885753 | 0.252959282 | 0.999071534 | Ttlh5         | Ttlh5         | TTLH5    | 20.35220973 | 15.11896132 | 11.78103856 | 16.79046978 | 16.74305577 | 18.40882687 | 12.61948223 | 9.80970824  | 6.442629718 | 13.9868184  |
| ENSMUSG000000003380 | -0.293623017 | 7.342866305  | 1.306537656 | 0.25302249  | 0.999071534 | Rabac1        | Rabac1        | RABAC1   | 187.8719498 | 188.7202113 | 188.1600159 | 197.6696216 | 163.0485861 | 115.4735503 | 131.6309069 | 185.9008794 | 103.0820755 | 162.090232  |
| ENSMUSG000000041225 | 0.301967733  | 5.289923642  | 1.306271527 | 0.253070827 | 0.999071534 | Arhgap12      | Arhgap12      | ARHGAP12 | 28.70363372 | 38.12349855 | 32.31370576 | 43.36381659 | 38.06429085 | 26.48542679 | 35.39926553 | 53.05532344 | 42.81991703 | 44.05194208 |
| ENSMUSG000000085501 | 1.183303305  | -0.25593492  | 1.30618364  | 0.253086792 | 0.999071534 | Gm11772       | Gm11772       |          | 0.070180034 | 0.355740266 | 1.413724627 | 0           | 0.457817931 | 0.727621615 | 0.388291761 | 0.069082452 | 2.121353688 | 1.241820326 |
| ENSMUSG00000038738  | 0.896095706  | 1.606019242  | 1.306089269 | 0.253103937 | 0.999071534 | Shank1        | Shank1        | SHANK1   | 2.315941107 | 0.415030311 | 4.510454763 | 2.914048475 | 0.39241537  | 1.018670261 | 0.323576467 | 2.763298096 | 7.85686551  | 4.836563373 |
| ENSMUSG00000003032  | 0.375678151  | 5.682630116  | 1.305988627 | 0.253122223 | 0.999071534 | Klf4          | Klf4          | KLF4     | 36.56379748 | 50.27795766 | 53.99081671 | 40.65791444 | 50.16376474 | 41.54719423 | 21.09718567 | 99.40964899 | 58.92649132 | 49.73817199 |
| ENSMUSG00000024268  | 0.398793988  | 5.672072193  | 1.305518992 | 0.253207572 | 0.999071534 | Celf4         | Celf4         | CELf4    | 31.23011493 | 24.66465847 | 69.00322585 | 44.95960504 | 57.42344908 | 28.30448083 | 32.68122321 | 65.21383506 | 71.49747614 | 68.56155377 |
| ENSMUSG00000024926  | 0.271512865  | 4.930894859  | 1.305061942 | 0.253290668 | 0.999071534 | Kat5          | Kat5          | KAT5     | 26.45787265 | 31.36443349 | 30.29409915 | 21.36968882 | 33.87852691 | 31.50601594 | 32.42236203 | 37.85718391 | 32.3702859  | 23.98673997 |
| ENSMUSG00000028484  | 0.366316617  | 7.424306013  | 1.304489306 | 0.253394826 | 0.999071534 | Psp1          | Psp1          | PSIP1    | 103.5155495 | 98.77721398 | 226.6671819 | 189.6906793 | 154.5462531 | 177.9762471 | 122.1824741 | 153.0176321 | 233.6631803 | 222.0244024 |

|                     |              |              |             |             |             |               |               |          |  |  |             |             |             |             |             |             |             |             |             |             |
|---------------------|--------------|--------------|-------------|-------------|-------------|---------------|---------------|----------|--|--|-------------|-------------|-------------|-------------|-------------|-------------|-------------|-------------|-------------|-------------|
| ENSMUSG00000087639  | 1.041552222  | -0.293223309 | 1.303949982 | 0.253492973 | 0.999071534 | Gm15512       | Gm15512       |          |  |  | 0.070180034 | 0.415030311 | 0.875162864 | 0.277528426 | 0.654025616 | 0.509335131 | 1.229590576 | 1.312566595 | 0           | 1.437897219 |
| ENSMUSG000000025133 | -0.304431364 | 4.243178591  | 1.303375599 | 0.253597551 | 0.999071534 | Ints4         | Ints4         | INTS4    |  |  | 25.19463204 | 23.8938879  | 16.5607742  | 15.74973819 | 27.14206306 | 24.44808627 | 18.12028217 | 12.02034672 | 11.07818037 | 17.51620249 |
| ENSMUSG000000041841 | 0.412932936  | 8.821827585  | 1.302677196 | 0.253724781 | 0.999071534 | RpB7          | RpB7          | RPL37    |  |  | 313.0731296 | 270.9555029 | 554.7186156 | 514.7458485 | 345.5871355 | 225.4171764 | 388.1623303 | 532.2802957 | 641.1202256 | 587.0542192 |
| ENSMUSG000000006519 | -0.320699272 | 6.655537583  | 1.30266479  | 0.253727042 | 0.999071534 | Cyba          | Cyba          | CYBA     |  |  | 186.8894293 | 95.16052127 | 96.33523531 | 109.415582  | 93.85267589 | 110.7440098 | 136.2904081 | 74.47088368 | 41.56281855 | 80.58760323 |
| ENSMUSG000000058267 | 0.268795079  | 5.824924212  | 1.302091322 | 0.253831573 | 0.999071534 | Mrps14        | Mrps14        | MRPS14   |  |  | 51.37178455 | 36.81911758 | 61.46336117 | 59.59922953 | 56.24620297 | 47.0771185  | 69.95723225 | 58.92733189 | 57.82653015 | 59.21522184 |
| ENSMUSG000000035757 | 0.252955213  | 4.810618351  | 1.301732641 | 0.253896979 | 0.999071534 | Selo          | Selo          | SELO     |  |  | 26.03679244 | 27.5105806  | 21.20586941 | 27.40593209 | 30.1505809  | 32.59744836 | 33.58723732 | 27.14940379 | 24.19914577 | 29.34617506 |
| ENSMUSG000000021703 | -0.292739869 | 4.502902822  | 1.301306085 | 0.25397479  | 0.999071534 | Serinc5       | Serinc5       | SERINC5  |  |  | 18.17662869 | 36.81911758 | 23.56207712 | 27.12840366 | 22.825494   | 21.46483765 | 19.8675951  | 18.09960253 | 15.32088774 | 23.33315033 |
| ENSMUSG000000040195 | 0.305879193  | 4.292420199  | 1.30090017  | 0.254048863 | 0.999071534 | Tmem194       | Tmem194       | NEMP1    |  |  | 19.08896912 | 19.6250047  | 11.64639812 | 18.17811192 | 21.9752607  | 25.24847005 | 29.769035   | 18.09960253 | 13.74951464 | 18.49658695 |
| ENSMUSG000000018196 | 0.278895368  | 4.891244353  | 1.300606745 | 0.254102424 | 0.999071534 | Glrx2         | Glrx2         | GLRX2    |  |  | 30.03705436 | 24.48678834 | 26.52416681 | 28.23851737 | 29.23494503 | 24.08427546 | 32.16350086 | 25.8368372  | 31.50603069 | 39.73825042 |
| ENSMUSG000000036591 | 0.279085098  | 5.288058779  | 1.300085128 | 0.254197675 | 0.999071534 | Arhgap21      | Arhgap21      | ARHGAP21 |  |  | 32.07227533 | 38.77568904 | 39.92089066 | 30.59750899 | 41.59602918 | 54.78990763 | 24.13880447 | 35.37021563 | 46.90548709 | 43.65978829 |
| ENSMUSG000000032788 | -0.408069785 | 4.94625368   | 1.300061007 | 0.25420208  | 0.999071534 | Pdxk          | Pdxk          | PDXX     |  |  | 46.10828204 | 50.45582779 | 21.07122897 | 33.37279325 | 31.19702188 | 60.17430758 | 29.25131265 | 17.82327272 | 6.756904338 | 23.2024324  |
| ENSMUSG000000021270 | 0.34905729   | 10.87709816  | 1.299962353 | 0.25422201  | 0.999071534 | Hsp90aa1      | Hsp90aa1      | HSP90AA1 |  |  | 1406.337692 | 1387.268459 | 2131.627457 | 1886.360713 | 1745.790577 | 1747.965406 | 1634.902459 | 1476.775585 | 2783.923156 | 2174.42739  |
| ENSMUSG000000090213 | -0.303232629 | 5.395063668  | 1.299011658 | 0.254393835 | 0.999071534 | Tmem189       | Tmem189       | TMEM189  |  |  | 47.79260284 | 69.36935196 | 42.41173882 | 29.00172054 | 53.63010051 | 37.61803751 | 31.51634792 | 55.61137418 | 21.44924284 | 36.14350737 |
| ENSMUSG000000014470 | -0.255241972 | 4.871398665  | 1.298824739 | 0.25442801  | 0.999071534 | Rnf166        | Rnf166        | RNF166   |  |  | 31.01957483 | 31.54230362 | 29.28429585 | 35.87054909 | 36.62543449 | 33.90716727 | 19.99702569 | 23.83344608 | 23.17775325 | 27.97363681 |
| ENSMUSG000000087289 | -0.887498821 | -0.037781541 | 1.298593269 | 0.254470339 | 0.999071534 | 4933424M12Rik | 4933424M12Rik |          |  |  | 1.754500839 | 0.889350666 | 0.673202203 | 1.387642131 | 0.915635862 | 1.382481069 | 0.582437641 | 0.345412262 | 0           | 0.71894861  |
| ENSMUSG000000059811 | 0.256296969  | 5.478164253  | 1.297940133 | 0.254589825 | 0.999071534 | Atl2          | Atl2          | ATL2     |  |  | 43.7221609  | 45.17901384 | 37.63200317 | 37.39695543 | 46.8282341  | 56.02686437 | 69.18064873 | 43.10745029 | 31.27032473 | 37.05853287 |
| ENSMUSG000000021733 | 0.27482021   | 6.204819076  | 1.297636649 | 0.254645368 | 0.999071534 | Slc4a7        | Slc4a7        | SLC4A7   |  |  | 55.16150636 | 59.64578467 | 87.85288755 | 75.97340667 | 65.92578209 | 67.52328589 | 77.07591453 | 66.80273146 | 87.28977581 | 81.89478252 |
| ENSMUSG000000031024 | -0.279097843 | 4.746641107  | 1.29722605  | 0.25472054  | 0.999071534 | St5           | St5           | ST5      |  |  | 35.1601968  | 31.30514345 | 27.19736902 | 29.34863107 | 29.16954247 | 40.16471316 | 17.60255983 | 26.04408455 | 14.53520119 | 21.89525311 |
| ENSMUSG000000016458 | 0.748550188  | 0.567777403  | 1.296566431 | 0.254841358 | 0.999071534 | Wt1           | Wt1           | WT1      |  |  | 0.491260235 | 0.355740266 | 1.548365068 | 1.873316877 | 0.915635862 | 0.800383777 | 1.423736457 | 2.279720929 | 1.807079067 | 1.633974113 |
| ENSMUSG000000030157 | 0.353682375  | 6.831046627  | 1.296415656 | 0.254868985 | 0.999071534 | Clec2d        | Clec2d        | CLEC2A   |  |  | 80.42631844 | 84.96263364 | 108.0489536 | 141.5394974 | 99.41189363 | 67.37776157 | 85.68304857 | 147.4219534 | 143.2306582 | 148.0380546 |
| ENSMUSG000000047798 | -0.442655048 | 4.06760724   | 1.29609109  | 0.254928467 | 0.999071534 | Cd300lf       | Cd300lf       | CD300LF  |  |  | 38.17793825 | 28.87425163 | 10.50195437 | 10.6154623  | 12.29568158 | 20.88274036 | 19.8028798  | 12.9184186  | 5.892649132 | 11.045665   |
| ENSMUSG000000039701 | 0.434735437  | 4.121662451  | 1.295752229 | 0.254990588 | 0.999071534 | Usp53         | Usp53         | USP53    |  |  | 9.684844629 | 25.02039874 | 16.89737531 | 10.6154623  | 14.25775843 | 11.93299449 | 11.06631518 | 38.20259617 | 15.32088774 | 17.1240487  |
| ENSMUSG000000019437 | 0.38319993   | 3.209144553  | 1.29561753  | 0.255015287 | 0.999071534 | Tlc1d         | Tlc1d         | TLCD1    |  |  | 7.158363421 | 8.359896261 | 8.549667983 | 9.64411281  | 7.194281776 | 8.731459383 | 9.642578728 | 9.878790692 | 6.756904338 | 14.77112598 |
| ENSMUSG000000020716 | -0.300940957 | 5.447513815  | 1.29551387  | 0.255034296 | 0.999071534 | Nf1           | Nf1           | NF1      |  |  | 29.89669429 | 51.99736894 | 59.17447368 | 50.09388093 | 57.68505933 | 48.31407525 | 22.39149154 | 52.57174627 | 29.69895163 | 36.2742253  |
| ENSMUSG000000020156 | 0.305791857  | 6.432490922  | 1.294402745 | 0.255238163 | 0.999071534 | Mum1          | Mum1          | MUM1     |  |  | 96.49754612 | 49.44789704 | 87.58360666 | 79.72004042 | 87.18161461 | 111.0350585 | 63.09741114 | 60.79255811 | 90.9825026  | 133.4630055 |
| ENSMUSG000000023249 | 0.286415807  | 4.641030417  | 1.294278173 | 0.255261032 | 0.999071534 | Parp3         | Parp3         | PARP3    |  |  | 20.00130956 | 21.10725581 | 23.62939734 | 21.92474567 | 29.49655528 | 24.59361059 | 19.34987275 | 31.6397632  | 25.92765618 | 28.1697137  |
| ENSMUSG000000071866 | 0.324955941  | 11.27031265  | 1.293395718 | 0.255423105 | 0.999071534 | Ppia          | Ppia          |          |  |  | 2291.097375 | 1511.421812 | 2492.935079 | 2632.634651 | 2417.671092 | 2052.911625 | 3256.149991 | 2418.714823 | 2624.82163  | 2653.181805 |
| ENSMUSG000000063704 | 1.087264307  | -0.647103547 | 1.293334166 | 0.255434414 | 0.999071534 | Mapk15        | Mapk15        | MAPK15   |  |  | 0.350900168 | 0.237160178 | 0           | 0.277528426 | 0.850233301 | 0.582097292 | 0.129430587 | 0.414494714 | 1.099961171 | 1.045743432 |
| ENSMUSG000000054723 | -0.423164166 | 2.574231832  | 1.293008314 | 0.255494296 | 0.999071534 | Vmac          | Vmac          | VMAC     |  |  | 7.368903522 | 7.292675462 | 4.779735644 | 7.562649614 | 7.586697145 | 6.912405345 | 4.400639957 | 3.108710358 | 4.085570065 | 5.816947841 |
| ENSMUSG000000020096 | 0.769240918  | 1.776748378  | 1.292947512 | 0.255505472 | 0.999071534 | Tbata         | Tbata         | TBATA    |  |  | 2.105401006 | 1.660121243 | 3.164050356 | 4.579219032 | 1.046440986 | 1.164194584 | 0.776583522 | 2.486968286 | 9.585375922 | 4.182973728 |
| ENSMUSG000000021242 | -0.339138319 | 8.862364269  | 1.292926396 | 0.255509353 | 0.999071534 | Npc2          | Npc2          | NPC2     |  |  | 658.7097948 | 750.1376418 | 378.0703574 | 449.318522  | 471.2254563 | 403.3934235 | 586.5147048 | 431.9034924 | 207.4998181 | 379.5395069 |
| ENSMUSG000000029311 | -0.250740876 | 5.418923367  | 1.292454896 | 0.255596037 | 0.999071534 | Hsd17b11      | Hsd17b11      | HSD17B11 |  |  | 40.00261912 | 56.02909196 | 38.97840758 | 44.95960504 | 61.02058997 | 46.64054554 | 40.83535019 | 42.69295558 | 27.97044121 | 31.56837986 |
| ENSMUSG000000006369 | 0.701095411  | 2.36868817   | 1.291894515 | 0.255699109 | 0.999071534 | Fbln1         | Fbln1         | FBLN1    |  |  | 7.088183388 | 4.268883197 | 2.760129034 | 2.497755836 | 3.400933203 | 10.11394045 | 16.89069616 | 2.210638477 | 1.335667137 | 1.241820326 |
| ENSMUSG000000063275 | 0.27585053   | 4.633962808  | 1.29175066  | 0.255725577 | 0.999071534 | Ptpla         | Hacd1         | HACD1    |  |  | 19.36968926 | 19.0913943  | 26.05292527 | 24.63064782 | 26.61884257 | 23.86598898 | 25.36839504 | 29.08371246 | 21.5278115  | 29.80368781 |
| ENSMUSG000000028794 | 0.778319409  | 0.314111548  | 1.29085782  | 0.255889926 | 0.999071534 | A3galt2       | A3galt2       | A3GALT2  |  |  | 0.912340436 | 1.363671021 | 0.336601102 | 0.485674746 | 1.177246109 | 1.382481069 | 0.388291761 | 2.348803381 | 1.021392516 | 1.633974113 |
| ENSMUSG000000057409 | 0.348364922  | 3.56184214   | 1.29068211  | 0.255922284 | 0.999071534 | Zfp53         | Zfp53         |          |  |  | 10.52700503 | 10.61291795 | 9.82875217  | 8.811527532 | 13.73453794 | 11.20537287 | 16.56711513 | 15.12905707 | 9.821081887 | 10.06528053 |
| ENSMUSG000000029673 | -0.670439027 | 2.066262165  | 1.290446728 | 0.255965641 | 0.999071534 | Auts2         | Auts2         | AUTS2    |  |  | 4.210802013 | 4.03172302  | 5.92417939  | 9.713494917 | 1.504258917 | 4.80230266  | 0.906014109 | 0.898071881 | 3.064177549 | 5.620870947 |
| ENSMUSG000000037894 | 0.381357538  | 9.301144963  | 1.289816255 | 0.256081815 | 0.999071534 | H2afz         | H2afz         | H2AF2    |  |  | 673.0967017 | 280.38262   | 671.7211586 | 725.1123955 | 476.4576612 | 671.5947509 | 993.832762  | 373.9433148 | 746.7950667 | 612.2174205 |
| ENSMUSG000000020395 | -0.742896204 | 0.279094872  | 1.289807544 | 0.256083421 | 0.999071534 | Itk           | Itk           | ITK      |  |  | 1.684320805 | 1.422961066 | 1.88496617  | 0.624438959 | 1.438856355 | 0.800383777 | 0.323576467 | 0.759906976 | 1.178529826 | 0.71894861  |

|                     |              |              |             |             |             |               |               |              |             |             |             |             |             |             |             |             |             |             |
|---------------------|--------------|--------------|-------------|-------------|-------------|---------------|---------------|--------------|-------------|-------------|-------------|-------------|-------------|-------------|-------------|-------------|-------------|-------------|
| ENSMUSG00000032743  | 0.390583579  | 3.619832516  | 1.289598251 | 0.256122001 | 0.999071534 | D430042O09Rik | D430042O09Rik | KIAA0556     | 11.86042567 | 12.1544591  | 10.97319592 | 6.660682229 | 13.34212257 | 14.5524323  | 6.147952881 | 11.95126426 | 16.26371161 | 16.47045906 |
| ENSMUSG00000067995  | 0.270278051  | 5.481303302  | 1.289510438 | 0.25613819  | 0.999071534 | Gtf2f2        | Gtf2f2        | GTf2F2       | 51.51214462 | 38.95355918 | 45.10454763 | 36.07869541 | 38.3259011  | 44.38491853 | 64.71529348 | 32.74508243 | 47.53403633 | 42.94083968 |
| ENSMUSG00000042737  | -0.310531379 | 5.864182492  | 1.289431753 | 0.256152698 | 0.999071534 | Dpm3          | Dpm3          | DPM3         | 92.21656407 | 37.94562842 | 70.4842707  | 85.75628369 | 45.71639056 | 44.23939421 | 58.04961825 | 41.03497672 | 50.12680195 | 53.26755607 |
| ENSMUSG00000074259  | 0.881964797  | 0.27696525   | 1.289272242 | 0.25618211  | 0.999071534 | Gramd2        | Gramd2        | GRAMD2       | 1.684320805 | 0.355740266 | 0.807842644 | 0           | 1.177246109 | 1.528005392 | 0.841298815 | 1.036236786 | 1.335667137 | 2.0261279   |
| ENSMUSG00000036862  | -0.509205615 | 2.60654248   | 1.288883149 | 0.256253874 | 0.999071534 | Dchs1         | Dchs1         | DCHS1        | 5.824942784 | 10.19788764 | 7.87646578  | 5.481186417 | 6.998074091 | 10.33222694 | 5.694945826 | 1.519813953 | 2.121353688 | 5.490153018 |
| ENSMUSG00000020905  | -0.857773488 | -0.300372427 | 1.288623838 | 0.256301715 | 0.999071534 | Usp43         | Usp43         | USP43        | 1.333420637 | 0.355740266 | 1.211763966 | 0.971349492 | 0.654025616 | 0.654859454 | 0.19414588  | 0.483577167 | 0.235705965 | 0.784307574 |
| ENSMUSG00000041073  | -0.885751981 | 0.171693152  | 1.28806418  | 0.256405004 | 0.999071534 | Nacad         | Nacad         | NACAD        | 0.140360067 | 1.48225111  | 1.346404407 | 2.358991623 | 1.24264867  | 0.509335131 | 0.19414588  | 1.174401691 | 0.392843275 | 1.045743432 |
| ENSMUSG00000071862  | 0.991180121  | 0.038568127  | 1.288028112 | 0.256411663 | 0.999071534 | Lrrtm2        | Lrrtm2        | LRRTM2       | 0.280720134 | 0.118580089 | 0.201960661 | 1.873316877 | 0.588623054 | 0.800383777 | 1.035444696 | 0.207247357 | 1.807079067 | 1.764692042 |
| ENSMUSG00000039686  | -0.398087725 | 3.669130376  | 1.28589995  | 0.256804915 | 0.999071534 | Zer1          | Zer1          | ZER1         | 16.14140771 | 17.13482283 | 12.2522801  | 9.019673851 | 20.34019666 | 12.87890259 | 6.665675228 | 14.99089217 | 4.399844685 | 14.57504908 |
| ENSMUSG00000028274  | 0.30289769   | 4.658901187  | 1.28586118  | 0.256812086 | 0.999071534 | Rngtt         | Rngtt         | RNGTT        | 26.52805268 | 24.78323856 | 19.79214478 | 20.95339618 | 24.98377853 | 28.08619435 | 34.81682789 | 15.19813953 | 30.64177549 | 23.46386826 |
| ENSMUSG00000022075  | -0.298638932 | 4.408881812  | 1.284879949 | 0.256993659 | 0.999071534 | Rhobtb2       | Rhobtb2       | RHOBTB2      | 28.98435385 | 25.4947191  | 18.64770103 | 14.8477708  | 33.94392947 | 26.04885382 | 14.48385864 | 15.54355179 | 13.1209654  | 19.93448417 |
| ENSMUSG00000012117  | -0.308578096 | 4.789396378  | 1.284689469 | 0.257028925 | 0.999071534 | Dhdds         | Dhdds         | DHDDS        | 42.17820016 | 30.1786326  | 26.12024549 | 24.07559097 | 36.42922681 | 43.22072394 | 31.12805616 | 16.99428329 | 14.61376985 | 17.45084352 |
| ENSMUSG00000041426  | 0.325138315  | 4.14521872   | 1.284658856 | 0.257034594 | 0.999071534 | Hibch         | Hibch         | HIBCH        | 13.33420637 | 16.30476221 | 16.69541464 | 17.69243717 | 16.67765321 | 13.31547556 | 23.42693624 | 15.54355179 | 21.13496822 | 18.36586903 |
| ENSMUSG00000044496  | -0.227977916 | 6.134222869  | 1.284052761 | 0.257146851 | 0.999071534 | 2510039O18Rik | 2510039O18Rik | KIAA2013     | 87.23378169 | 83.95470288 | 70.61891114 | 76.66722774 | 74.29730997 | 76.69131824 | 60.24993823 | 66.11190694 | 44.94127072 | 66.86222069 |
| ENSMUSG00000008575  | 0.477041008  | 7.20846168   | 1.284030019 | 0.257151064 | 0.999071534 | Nfib          | Nfib          | NFIB         | 64.56563086 | 71.85953382 | 166.9541464 | 182.7524687 | 149.183243  | 116.2739341 | 50.15435245 | 162.0674333 | 259.9051111 | 197.6455087 |
| ENSMUSG00000041685  | 0.273003053  | 5.824830568  | 1.283871847 | 0.25718037  | 0.999071534 | Fcho2         | Fcho2         | FCHO2        | 42.59928036 | 51.76020877 | 52.24049099 | 48.63685669 | 71.02718189 | 46.20397257 | 53.97255476 | 82.2772008  | 52.95527354 | 58.10411944 |
| ENSMUSG00000023170  | 0.319954227  | 4.99888095   | 1.283649181 | 0.257221633 | 0.999071534 | Gps2          | Gps2          | GPS2         | 23.36995117 | 26.08761954 | 33.18886863 | 32.47082586 | 31.45863213 | 31.43325378 | 16.43768454 | 37.30452429 | 38.10579772 | 43.65978829 |
| ENSMUSG00000020741  | 0.287044315  | 5.591671569  | 1.283104523 | 0.257322599 | 0.999071534 | Cluh          | Cluh          | CLUH         | 57.7581676  | 44.17108308 | 41.60389617 | 41.90679236 | 39.76475745 | 91.53479919 | 52.87239477 | 25.62958984 | 37.39867983 | 56.5355043  |
| ENSMUSG00000019876  | 0.461137988  | 2.650490731  | 1.282988877 | 0.257344043 | 0.999071534 | Pkib          | Pkib          | PKIB         | 4.702062247 | 4.209593153 | 8.616988204 | 4.301690606 | 5.035997243 | 5.457162114 | 4.530070544 | 6.079255811 | 8.721120716 | 8.56202435  |
| ENSMUSG000000060288 | 0.340842483  | 4.626441145  | 1.282474883 | 0.257439379 | 0.999071534 | Ppih          | Ppih          | PPIH         | 29.89669429 | 12.6880695  | 24.90848153 | 25.04694046 | 19.7515736  | 24.9574214  | 41.87079488 | 18.79042705 | 25.61338156 | 20.0652021  |
| ENSMUSG00000019929  | 0.371805215  | 10.7533214   | 1.282453833 | 0.257443285 | 0.999071534 | Dcn           | Dcn           | DCN          | 1223.027445 | 1269.518431 | 1197.62672  | 2097.282317 | 1984.052109 | 1046.247121 | 2059.823076 | 1623.852126 | 2231.978354 | 2087.042455 |
| ENSMUSG00000075014  | -0.879007358 | 0.294704326  | 1.282204455 | 0.257489556 | 0.999071534 | Gm10800       | Gm10800       |              | 1.122880537 | 1.067220799 | 0.605881983 | 3.885397967 | 0.523220493 | 0.509335131 | 0.323576467 | 0.967154334 | 1.335667137 | 0.392153787 |
| ENSMUSG00000028076  | -0.458649879 | 3.479044555  | 1.281691475 | 0.257584771 | 0.999071534 | Cd1d1         | Cd1d1         | CD1D         | 20.42238976 | 17.01624274 | 10.77123525 | 10.6154623  | 7.586697145 | 8.658697221 | 14.49622574 | 6.079255811 | 2.985608894 | 13.52930565 |
| ENSMUSG00000035365  | 0.351966489  | 3.95933231   | 1.281677526 | 0.257587361 | 0.999071534 | Parbp         | Parbp         | PARBP        | 16.84320805 | 8.893506661 | 14.94508892 | 14.8477708  | 14.78097892 | 21.31931333 | 27.63343032 | 13.60924312 | 10.6853709  | 11.76461361 |
| ENSMUSG00000066357  | -0.301485132 | 5.961567005  | 1.281559412 | 0.25760929  | 0.999071534 | Wdr6          | Wdr6          | WDR6         | 65.19725116 | 60.89087561 | 86.23720226 | 81.10768256 | 61.4784079  | 110.3074369 | 35.46398083 | 37.71901901 | 39.3628962  | 57.38517084 |
| ENSMUSG000000001415 | 0.265126696  | 6.242612223  | 1.280862245 | 0.257738777 | 0.999071534 | Smg5          | Smg5          | SMG5         | 93.47980468 | 66.40484974 | 70.34963026 | 61.19501798 | 65.86037953 | 122.6770043 | 65.81545347 | 52.64082872 | 79.11863568 | 82.28693631 |
| ENSMUSG00000022837  | 0.361220189  | 4.13935361   | 1.280845368 | 0.257741913 | 0.999071534 | Iqcb1         | Iqcb1         | IQCB1        | 8.702324159 | 15.23754141 | 19.32090324 | 19.14946141 | 16.61225065 | 12.95166475 | 15.53167044 | 25.35326003 | 19.72073243 | 18.75802281 |
| ENSMUSG000000091337 | -0.274871256 | 6.493320969  | 1.280759194 | 0.257757924 | 0.999071534 | Eid1          | Eid1          | EID1         | 102.7435691 | 143.8376477 | 77.62021405 | 101.9223145 | 85.1541352  | 130.6080799 | 86.71849326 | 62.17420715 | 50.75535119 | 75.35888607 |
| ENSMUSG000000004127 | 0.337047763  | 3.600365258  | 1.28057246  | 0.257792623 | 0.999071534 | Trmt10a       | Trmt10a       | TRMT10A      | 10.80772517 | 10.31646773 | 11.915679   | 9.297202278 | 12.81890207 | 12.6606161  | 18.37914335 | 9.53337843  | 10.92104306 | 13.00643394 |
| ENSMUSG00000020811  | -0.636061981 | 1.263502618  | 1.280141205 | 0.257872782 | 0.999071534 | Wscd1         | Wscd1         | WSCD1        | 4.000261912 | 3.853852886 | 2.760129034 | 2.567137942 | 1.111843547 | 2.692199976 | 2.135604685 | 0.414494714 | 1.178529826 | 2.352922722 |
| ENSMUSG00000049764  | 0.340808304  | 0.4044949601 | 1.279999711 | 0.257899089 | 0.999071534 | Zfp280b       | Zfp280b       | ZNF280B      | 15.29924731 | 14.70393101 | 17.23397641 | 7.285121188 | 21.1250274  | 22.62903223 | 13.20191987 | 18.16868498 | 18.46363395 | 15.55543355 |
| ENSMUSG000000052837 | -0.317838844 | 7.449830169  | 1.279604798 | 0.257972529 | 0.999071534 | Junb          | Junb          | JUNB         | 238.1208538 | 212.9698395 | 225.4554179 | 134.6012867 | 200.3934487 | 163.7876256 | 99.46740608 | 227.9720929 | 97.73940694 | 165.3581802 |
| ENSMUSG000000037486 | 0.287688896  | 4.576256251  | 1.279440849 | 0.258003026 | 0.999071534 | Asxl2         | Asxl2         | ASXL2        | 16.56248792 | 21.7594463  | 21.20586941 | 22.96547727 | 28.31930917 | 27.94067002 | 18.37914335 | 29.22187736 | 23.33489056 | 26.3396627  |
| ENSMUSG00000048388  | -0.528957721 | 2.352757445  | 1.279020463 | 0.258081243 | 0.999071534 | Fam171b       | Fam171b       | FAM171B      | 2.245761073 | 4.861783641 | 5.049016526 | 11.51742969 | 6.344048475 | 4.220205368 | 3.818202315 | 2.970545453 | 4.949825271 | 3.33330719  |
| ENSMUSG000000024286 | -0.303140312 | 5.904148207  | 1.276772744 | 0.258499952 | 0.999071534 | Ccny          | Ccny          | CCNY         | 87.93558203 | 88.57932634 | 55.13526046 | 58.97479057 | 52.91067233 | 93.49937756 | 69.89251696 | 42.00213106 | 27.26323332 | 36.86245598 |
| ENSMUSG00000043241  | 0.353622872  | 5.323047391  | 1.275978924 | 0.258648027 | 0.999071534 | Upf2          | Upf2          | UPF2         | 23.93139144 | 37.17485784 | 48.47055865 | 38.22954071 | 33.35530641 | 35.87174563 | 17.99085159 | 48.84129384 | 51.85531236 | 55.03224811 |
| ENSMUSG00000028647  | 0.350304361  | 4.691711824  | 1.275570608 | 0.258724233 | 0.999071534 | Mycbp         | Mycbp         | RPS-864K19.6 | 31.58101509 | 10.96865822 | 22.01371205 | 28.93233843 | 23.47951961 | 25.97609166 | 39.21746785 | 17.06336574 | 28.91326508 | 26.1435858  |
| ENSMUSG000000021392 | 0.315535252  | 5.013426008  | 1.275260273 | 0.258782171 | 0.999071534 | NoI8          | NoI8          | NOL8         | 18.10644865 | 25.02039874 | 32.04442488 | 32.54020797 | 40.74579587 | 41.11062126 | 23.55636683 | 24.10977589 | 40.22715141 | 41.2415066  |
| ENSMUSG00000025537  | 0.64715979   | 1.937052827  | 1.274899034 | 0.258849632 | 0.999071534 | Phkg1         | Phkg1         | PHKG1        | 1.333420637 | 2.253021687 | 4.712415424 | 4.02416218  | 2.550699902 | 1.382481069 | 2.135604685 | 3.17779281  | 7.6997282   | 5.94766577  |

|                     |              |              |             |             |             |               |               |              |             |             |             |             |             |             |             |             |             |             |
|---------------------|--------------|--------------|-------------|-------------|-------------|---------------|---------------|--------------|-------------|-------------|-------------|-------------|-------------|-------------|-------------|-------------|-------------|-------------|
| ENSMUSG00000028494  | -0.330940323 | 8.042484266  | 1.274667919 | 0.258892805 | 0.999071534 | Plin2         | Plin2         | PLIN2        | 253.3499211 | 541.3181054 | 281.3312008 | 201.832548  | 253.2387185 | 260.3430139 | 257.3080069 | 228.4556701 | 157.8444281 | 233.0047085 |
| ENSMUSG00000028514  | 0.236588704  | 5.515924536  | 1.274483437 | 0.258927272 | 0.999071534 | Usp24         | Usp24         | USP24        | 43.7221609  | 51.64162868 | 39.98821088 | 33.51155746 | 49.44433657 | 63.44860485 | 41.22364195 | 45.31808877 | 43.84130954 | 45.55519826 |
| ENSMUSG000000024140 | -0.294532131 | 4.283412429  | 1.273987479 | 0.259019962 | 0.999071534 | Epas1         | Epas1         | EPAS1        | 19.86094949 | 24.84252861 | 23.76403778 | 21.57783514 | 20.47100178 | 29.6869619  | 12.10175988 | 15.8198816  | 12.09957289 | 16.66653595 |
| ENSMUSG000000029185 | -0.287184692 | 5.89606417   | 1.273686836 | 0.25907617  | 0.999071534 | Fam114a1      | Fam114a1      | FAM114A1     | 53.96844579 | 90.29873763 | 68.19538321 | 50.78770199 | 77.04421756 | 53.11637791 | 52.6135336  | 77.57959404 | 26.08479349 | 51.63358196 |
| ENSMUSG000000067942 | 0.268461134  | 4.553689348  | 1.273145577 | 0.2591774   | 0.999071534 | Zfp160        | Zfp160        | ZNF347       | 23.72085134 | 20.45506532 | 21.47515029 | 22.41042042 | 21.84445557 | 23.86598898 | 29.18659736 | 20.58657081 | 22.62777267 | 26.01286787 |
| ENSMUSG000000097090 | -0.996780788 | -0.212335733 | 1.273034907 | 0.259198105 | 0.999071534 | Gm26724       | Gm26724       |              | 2.035220973 | 1.007930755 | 1.009803305 | 0.832585279 | 0.130805123 | 0.873145938 | 0.388291761 | 0.207247357 | 0           | 0.980384468 |
| ENSMUSG000000084081 | 1.382716049  | -0.570922356 | 1.271469949 | 0.2594911   | 0.999071534 | Gm12057       | Gm12057       |              | 0           | 0.237160178 | 0           | 0           | 1.373453794 | 0.509335131 | 0.258861174 | 0.138164905 | 1.335667137 | 1.437897219 |
| ENSMUSG000000067220 | 1.111980885  | -0.538096497 | 1.271398936 | 0.259504404 | 0.999071534 | Cnga1         | Cnga1         | CNGA1        | 0.280720134 | 0.118580089 | 0.875162864 | 0.555056852 | 0           | 0.291048646 | 0.19414588  | 0.552659619 | 1.099961171 | 1.437897219 |
| ENSMUSG000000034614 | -0.394754109 | 4.059255602  | 1.271210501 | 0.259539713 | 0.999071534 | Plk3ip1       | Plk3ip1       | PIK3IP1      | 11.01826527 | 17.84630337 | 18.78234148 | 29.27924896 | 19.62076848 | 9.822891806 | 9.448432848 | 22.45179703 | 9.428238612 | 16.99333077 |
| ENSMUSG000000071660 | 0.243052712  | 5.502457961  | 1.270999974 | 0.259579169 | 0.999071534 | Ttc9c         | Ttc9c         | TTC9C        | 43.58180083 | 39.66503971 | 47.73003622 | 35.24611013 | 49.24812888 | 60.39259406 | 56.94945826 | 35.23205072 | 43.68417223 | 41.30686557 |
| ENSMUSG000000043088 | 1.054091619  | 0.081471639  | 1.270460643 | 0.259680281 | 0.999071534 | Il17re        | Il17re        | IL17RE       | 0.491260235 | 0.237160178 | 1.144443746 | 1.110113705 | 0.196207685 | 0.363810808 | 0.064715293 | 0.690824524 | 3.457020824 | 0.980384468 |
| ENSMUSG000000027864 | -0.286533233 | 7.786459587  | 1.270450131 | 0.259682253 | 0.999071534 | Ptgfrn        | Ptgfrn        | PTGFRN       | 213.9789223 | 341.747816  | 210.0390875 | 242.212934  | 251.2112391 | 267.0371328 | 166.3830195 | 174.7786046 | 160.4371937 | 201.8284824 |
| ENSMUSG000000041078 | 0.454283378  | 2.964747975  | 1.270236233 | 0.259722368 | 0.999071534 | Grid1         | Grid1         | GRID1        | 5.193322482 | 6.936935196 | 4.981696305 | 4.648601139 | 12.0994739  | 5.384399953 | 9.383717555 | 9.049801264 | 5.578374512 | 13.0717929  |
| ENSMUSG000000021495 | 0.426828398  | 6.514057931  | 1.268826484 | 0.259986946 | 0.999071534 | Fam193b       | Fam193b       | FAM193B      | 79.3034379  | 52.17523908 | 99.63392611 | 90.0579743  | 81.68779943 | 56.60896166 | 28.66887501 | 139.8228836 | 98.76079946 | 165.5542571 |
| ENSMUSG000000081087 | -0.372608214 | 7.871842885  | 1.268804296 | 0.259991113 | 0.999071534 | Rps15a-ps7    | Rps15a-ps7    |              | 452.2401361 | 232.2391039 | 211.0488908 | 277.0427515 | 199.8702282 | 197.9858415 | 349.3978695 | 166.4196278 | 91.06107126 | 197.5801497 |
| ENSMUSG000000025316 | 0.364480694  | 5.264747637  | 1.268707095 | 0.260009368 | 0.999071534 | Banp          | Banp          | BANP         | 25.33499211 | 29.40786203 | 39.31500868 | 38.1601586  | 41.20361381 | 27.21304841 | 17.53784453 | 48.91037629 | 48.24115423 | 59.01914495 |
| ENSMUSG000000066487 | -0.505011815 | 2.839630912  | 1.268638073 | 0.260022332 | 0.999071534 | Gm5786        | Gm5786        |              | 9.193584394 | 8.359896261 | 6.732022034 | 12.21125075 | 5.951633105 | 8.804221544 | 9.383717555 | 1.588896405 | 2.28471584  | 6.470537486 |
| ENSMUSG000000022895 | -0.253796425 | 5.940208212  | 1.268357081 | 0.260075117 | 0.999071534 | Ets2          | Ets2          | ETS2         | 75.16281592 | 90.53589781 | 63.41564756 | 53.77113258 | 64.29071805 | 80.11113984 | 39.92933608 | 57.89109511 | 37.08440521 | 60.3916832  |
| ENSMUSG000000078887 | 0.508524561  | 2.010934065  | 1.267638181 | 0.260210224 | 0.999071534 | Gm6710        | Gm6710        | ZNF788       | 4.35116208  | 1.660121243 | 4.914376085 | 1.665170557 | 4.251166504 | 4.729540499 | 5.371369359 | 3.937699786 | 3.378452169 | 4.771204409 |
| ENSMUSG000000029434 | -0.29892575  | 4.608161973  | 1.267539728 | 0.260228733 | 0.999071534 | Vps33a        | Vps33a        | RP11-512M8.5 | 31.51083506 | 33.9139054  | 24.57188042 | 23.86744465 | 25.3761939  | 39.00051858 | 23.94465859 | 15.54355179 | 15.08518178 | 15.16327977 |
| ENSMUSG000000031156 | -0.259355333 | 5.128704441  | 1.267210391 | 0.260290662 | 0.999071534 | Slc35a2       | Slc35a2       | SLC35A2      | 42.66946039 | 46.42410477 | 38.77644692 | 32.12391533 | 37.73727804 | 38.2001348  | 35.26983495 | 30.60352641 | 15.47802505 | 36.92781495 |
| ENSMUSG000000089995 | 1.768174604  | -0.520309929 | 1.266895354 | 0.260349918 | 0.999071534 | Gm15716       | Gm15716       |              | 0           | 0           | 0.269280881 | 1.040731598 | 0           | 0           | 0           | 0.069082452 | 1.807079067 | 2.156845829 |
| ENSMUSG000000097755 | 0.908891857  | 0.27283136   | 1.266702294 | 0.26038624  | 0.999071534 | 2010110K18Rik | 2010110K18Rik |              | 0.491260235 | 0.237160178 | 2.423527932 | 0.138764213 | 0.654025616 | 1.528005392 | 1.229590576 | 0.690824524 | 2.514196963 | 0.653589645 |
| ENSMUSG000000052560 | 0.398921586  | 6.273036334  | 1.266536338 | 0.260417468 | 0.999071534 | Cpne8         | Cpne8         | CPNE8        | 43.23090066 | 52.17523908 | 91.15157834 | 93.59646173 | 62.45944632 | 48.38683741 | 40.12348196 | 92.08690904 | 122.8028079 | 98.29988262 |
| ENSMUSG000000058230 | -0.282806949 | 5.471219801  | 1.2664571   | 0.260432379 | 0.999071534 | Grif1         | Arhgap35      | ARHGAP35     | 55.30186643 | 62.84744707 | 41.67121639 | 37.81324807 | 55.65757992 | 77.27341554 | 30.28675735 | 34.88663846 | 23.72773384 | 35.09776394 |
| ENSMUSG000000082804 | 0.789136717  | -0.21764492  | 1.266434955 | 0.260436547 | 0.999071534 | Rpl17-ps1     | Rpl17-ps1     |              | 0.421080201 | 0.711480533 | 0.605881983 | 0.555056852 | 0.457817931 | 0.582097292 | 1.359021163 | 1.243484143 | 0.471411931 | 0.784307574 |
| ENSMUSG000000026360 | -0.326439953 | 7.022935403  | 1.266031841 | 0.260512426 | 0.999071534 | Rgs2          | Rgs2          | RGS2         | 186.0472689 | 209.1159866 | 100.9803305 | 131.548474  | 124.722685  | 85.78658843 | 95.39034259 | 164.8307314 | 105.9891157 | 92.28685788 |
| ENSMUSG000000050359 | 0.987789335  | -0.295793674 | 1.265738952 | 0.260567574 | 0.999071534 | Sprr1a        | Sprr1a        | SPRR1A       | 0.421080201 | 0.474320355 | 0.942483085 | 0           | 0.588623054 | 1.236956746 | 0.19414588  | 0.690824524 | 1.571373102 | 0.653589645 |
| ENSMUSG000000069874 | -0.313932576 | 4.911263094  | 1.265581242 | 0.260597276 | 0.999071534 | Irgm2         | Irgm2         | IRGM         | 42.24838019 | 40.02077997 | 24.1679591  | 29.55677739 | 37.01784986 | 32.81573485 | 13.71964222 | 27.21848624 | 16.9708295  | 39.99968628 |
| ENSMUSG000000026574 | 1.300572746  | 0.270540018  | 1.264920845 | 0.260721693 | 0.999071534 | Dpt           | Dpt           | DPT          | 1.824680872 | 0.770770577 | 0           | 0.346910533 | 0.261610246 | 2.037340523 | 5.436084652 | 0.207247357 | 0           | 0.065358965 |
| ENSMUSG000000031843 | 0.287688019  | 5.320603189  | 1.264635657 | 0.260775445 | 0.999071534 | Mphosph6      | Mphosph6      | MPHOSPH6     | 29.75633422 | 31.48301358 | 59.98231632 | 28.44666369 | 36.69083706 | 39.72814019 | 41.48250312 | 55.47320927 | 30.56320683 | 43.59442932 |
| ENSMUSG000000021936 | 0.249572069  | 4.938428885  | 1.264452366 | 0.260809998 | 0.999071534 | Mapk8         | Mapk8         | MAPK8        | 32.4231755  | 33.26171491 | 27.53397012 | 23.10424148 | 28.97333479 | 35.21688618 | 37.79373139 | 37.37360675 | 22.47063536 | 28.1697137  |
| ENSMUSG000000015968 | 0.472948829  | 1.955763534  | 1.263592907 | 0.260972097 | 0.999071534 | Cacna1d       | Cacna1d       | CACNA1D      | 4.140621979 | 3.675982753 | 3.164050356 | 2.428373729 | 2.943115272 | 7.130691829 | 3.882917609 | 3.799534882 | 3.771295445 | 2.875794438 |
| ENSMUSG000000021707 | 0.335459564  | 5.320758441  | 1.263445491 | 0.260999912 | 0.999071534 | Dhfr          | Dhfr          | DHFR         | 40.28333925 | 22.76737705 | 44.56598587 | 35.03796381 | 40.22257538 | 55.95410221 | 73.12828163 | 28.53105284 | 37.32011117 | 21.63381725 |
| ENSMUSG000000062300 | -0.240962794 | 6.066868662  | 1.263256257 | 0.261035624 | 0.999071534 | Pvr12         | Nectin2       | NECTIN2      | 73.75921525 | 73.10462475 | 70.08034938 | 76.52846352 | 82.66883786 | 63.52136701 | 53.90783947 | 77.37234668 | 40.61999469 | 61.82958042 |
| ENSMUSG000000040616 | -0.475425258 | 2.983656204  | 1.263124361 | 0.261060519 | 0.999071534 | Tmem51        | Tmem51        | TMEM51       | 14.17636678 | 10.96865822 | 8.953589305 | 4.093544286 | 9.221761185 | 10.98708639 | 9.383717555 | 3.730452429 | 2.784909998 | 6.53589645  |
| ENSMUSG000000057497 | 0.368848639  | 4.695605373  | 1.262754728 | 0.261130302 | 0.999071534 | Fam136a       | Fam136a       | FAM136A      | 33.61623607 | 19.98074497 | 19.65750434 | 17.27614453 | 27.01125794 | 35.72622131 | 55.33157592 | 13.26383086 | 16.81369219 | 22.41812483 |
| ENSMUSG000000001767 | 0.243852461  | 5.460332682  | 1.262231269 | 0.261229164 | 0.999071534 | Crnk1l        | Crnk1l        | CRNKL1       | 38.17793825 | 33.08384478 | 41.67121639 | 45.5146619  | 49.9021545  | 52.02494549 | 43.29453134 | 42.83112048 | 35.12018883 | 57.64660669 |
| ENSMUSG000000052751 | -0.377352229 | 3.171893704  | 1.262184924 | 0.261237919 | 0.999071534 | Repin1        | Repin1        | REPIN1       | 10.73754513 | 9.664277238 | 14.00260583 | 7.909560147 | 9.875786801 | 13.2427134  | 6.147952881 | 6.217420715 | 5.735511822 | 6.993409202 |

|                      |              |              |             |             |             |               |               |              |             |             |             |             |             |             |             |             |             |             |
|----------------------|--------------|--------------|-------------|-------------|-------------|---------------|---------------|--------------|-------------|-------------|-------------|-------------|-------------|-------------|-------------|-------------|-------------|-------------|
| ENSMUSG00000053012   | 0.256546727  | 6.348216758  | 1.261795978 | 0.26131141  | 0.999071534 | Krcc1         | Krcc1         | KRCC1        | 80.91757867 | 66.58271987 | 77.55289383 | 82.77285311 | 76.25938682 | 81.42085874 | 103.5444696 | 68.59887523 | 92.16103243 | 74.90137332 |
| ENSMUSG000000085795  | -0.277516432 | 5.973793949  | 1.261275252 | 0.261409841 | 0.999071534 | Zfp703        | Zfp703        | ZNF703       | 56.00366677 | 77.72924822 | 81.18818573 | 56.68518105 | 86.06977106 | 75.52712366 | 29.57488912 | 62.38145451 | 48.08401692 | 59.93417045 |
| ENSMUSG00000026571   | -0.282899372 | 4.743670309  | 1.260543885 | 0.261548166 | 0.999071534 | Dcaf6         | Dcaf6         | DCAF6        | 30.24759446 | 33.20242487 | 30.09213849 | 20.53710354 | 38.6529139  | 24.44808627 | 17.47312924 | 31.01802112 | 20.97783091 | 21.30702243 |
| ENSMUSG000000086707  | 1.196882891  | 0.517126842  | 1.25942924  | 0.261759155 | 0.999071534 | Gm12088       | Gm12088       |              | 1.19306057  | 0.355740266 | 0.201960661 | 2.358991623 | 0           | 0.436572969 | 0.129430587 | 2.556050739 | 4.714119306 | 0.130717929 |
| ENSMUSG000000091736  | 0.36607649   | 3.633938285  | 1.259212071 | 0.261800287 | 0.999071534 | Yy2           | Yy2           | YY2          | 13.75528657 | 6.106874574 | 10.43463415 | 8.672763319 | 17.07006858 | 15.06176744 | 13.07248928 | 10.08603805 | 13.59237733 | 14.57504908 |
| ENSMUSG00000075593   | -1.289486125 | -0.515493993 | 1.258781858 | 0.261881794 | 0.999071534 | Gal3st4       | Gal3st4       | GAL3ST4      | 1.333420637 | 2.01586151  | 0.201960661 | 0           | 0.588623054 | 0.509335131 | 0.776583522 | 0           | 0           | 0.326794823 |
| ENSMUSG000000035399  | 0.295684167  | 5.199866897  | 1.258698154 | 0.261897656 | 0.999071534 | Oser1         | Oser1         | OSER1        | 30.45813456 | 45.11972379 | 29.01501497 | 23.45115201 | 43.62350858 | 29.46867542 | 38.37616903 | 55.68045663 | 32.84169783 | 35.3591998  |
| ENSMUSG000000099083  | -0.306453387 | 5.640217008  | 1.258279574 | 0.261976995 | 0.999071534 | ATF7          | Atf7          | ATF7         | 39.72189898 | 85.55553408 | 52.10585054 | 41.76802814 | 67.56084613 | 64.17622646 | 27.30985385 | 60.44714584 | 26.63477408 | 40.84935282 |
| ENSMUSG000000025738  | -0.849230629 | -0.224169819 | 1.257445783 | 0.262135123 | 0.999071534 | Fbxl16        | Fbxl16        | FBXL16       | 1.333420637 | 1.304380977 | 1.009803305 | 0.832585279 | 0.327012808 | 0.873145938 | 0.323576467 | 0.621742072 | 0.549980586 | 0.130717929 |
| ENSMUSG000000001794  | -0.294759908 | 8.032948969  | 1.257409992 | 0.262141914 | 0.999071534 | Capns1        | Capns1        | CAPNS1       | 291.3173192 | 292.2999189 | 297.3534132 | 262.6806554 | 356.9671812 | 374.5796075 | 215.3077814 | 240.6832641 | 127.5954959 | 215.357788  |
| ENSMUSG000000086443  | 1.273660559  | -0.267973415 | 1.256531026 | 0.262308743 | 0.999071534 | 4933421A08Rik | 4933421A08Rik |              | 0.280720134 | 0           | 0.538561763 | 1.248877918 | 0.065402562 | 0.509335131 | 0.064715293 | 0.069082452 | 2.514196963 | 1.372538255 |
| ENSMUSG000000028149  | -0.269858142 | 6.651089764  | 1.256098936 | 0.262390802 | 0.999071534 | Rap1gds1      | Rap1gds1      | RAP1GDS1     | 112.4985938 | 128.3036561 | 117.8777058 | 93.52707963 | 118.901857  | 163.7876256 | 92.99587673 | 79.92839742 | 50.28393926 | 70.97983545 |
| ENSMUSG000000082575  | -0.981326576 | 0.27335138   | 1.256078235 | 0.262394735 | 0.999071534 | Gm13050       | Gm13050       |              | 1.824680872 | 3.320242487 | 0.06732022  | 0.555056852 | 1.63506404  | 1.45524323  | 1.48845175  | 0.414494714 | 0.15713731  | 0.130717929 |
| ENSMUSG000000080772  | 0.624456282  | 2.758765196  | 1.255967776 | 0.262415718 | 0.999071534 | Gm12543       | Gm12543       |              | 8.772504193 | 0.889350666 | 9.89607239  | 1.665170557 | 6.14784079  | 9.386318836 | 14.10793398 | 5.872008453 | 2.749902928 | 7.908434705 |
| ENSMUSG000000056498  | -0.477841348 | 2.44363077   | 1.255659779 | 0.262474237 | 0.999071534 | Tmem154       | Tmem154       | TMEM154      | 8.140883891 | 7.351965506 | 5.520258068 | 7.285121188 | 3.662543449 | 5.384399953 | 4.724216424 | 5.872008453 | 1.335667137 | 4.64048648  |
| ENSMUSG000000082128  | 0.666588578  | 0.629751263  | 1.255054695 | 0.262589249 | 0.999071534 | Gm11824       | Gm11824       |              | 0.98252047  | 2.01586151  | 0.471241542 | 0.832585279 | 1.373453794 | 2.255627007 | 2.523896446 | 1.174401691 | 0.864255206 | 1.764692042 |
| ENSMUSG000000031787  | -0.29394     | 4.265932885  | 1.254920029 | 0.262614855 | 0.999071534 | Katnb1        | Katnb1        | KATNB1       | 25.19463204 | 20.39577528 | 26.05295257 | 16.30479504 | 21.64824789 | 26.55818896 | 12.16647517 | 14.16190274 | 15.00661312 | 16.27438216 |
| ENSMUSG000000019897  | 0.235797621  | 5.682994981  | 1.254382979 | 0.262717    | 0.999071534 | Ccdc59        | Ccdc59        | CCDC59       | 45.96792197 | 47.43203553 | 46.11435093 | 46.41662928 | 58.60069519 | 47.29540499 | 59.79693117 | 56.57852851 | 48.86970347 | 51.76429989 |
| ENSMUSG000000003477  | -1.080472914 | -0.063837756 | 1.254268565 | 0.262738768 | 0.999071534 | Inmt          | Inmt          | INMT-FAM1888 | 1.543960738 | 0.889350666 | 0.942483085 | 0           | 2.485297341 | 0.072762162 | 0.776583522 | 0.138164905 | 0.235705965 | 1.241820326 |
| ENSMUSG000000044026  | 0.795427058  | 0.601221867  | 1.253936633 | 0.262801931 | 0.999071534 | Slc35g1       | Slc35g1       | SLC35G1      | 1.19306057  | 1.007930755 | 1.95228639  | 0.069382107 | 1.111843547 | 2.546675653 | 1.941458804 | 0.552659619 | 2.514196963 | 0.915025503 |
| ENSMUSG000000095427  | 0.760750234  | 0.940495187  | 1.253148478 | 0.262951986 | 0.999071534 | Rps2-ps6      | Rps2-ps6      |              | 0.491260235 | 0.415030311 | 0.807842644 | 3.746633754 | 1.24264867  | 1.528005392 | 2.653327033 | 1.588896405 | 1.021392516 | 4.117614764 |
| ENSMUSG000000025241  | -0.329640363 | 3.794468295  | 1.253146375 | 0.262952386 | 0.999071534 | Fyco1         | Fyco1         | FYCO1        | 12.70258607 | 19.20997439 | 13.80064517 | 17.41490874 | 16.15443271 | 16.51701067 | 9.060141087 | 14.507315   | 6.914041649 | 13.00643394 |
| ENSMUSG000000044783  | 0.288948344  | 5.267421604  | 1.252521616 | 0.263071408 | 0.999071534 | Hjurf         | Hjurf         | HJURP        | 44.9854015  | 34.03248549 | 32.24638554 | 26.57334681 | 42.5770676  | 72.47111288 | 49.76606069 | 36.06104015 | 18.46363395 | 36.2742253  |
| ENSMUSG0000000008005 | -1.476061276 | -0.840635682 | 1.252445698 | 0.263085876 | 0.999071534 | Car4          | Car4          | CA4          | 1.965040939 | 0.237160178 | 0.471241542 | 0           | 0.588623054 | 1.018670261 | 0           | 0           | 0           | 0.196076894 |
| ENSMUSG000000072582  | 0.279651824  | 5.192089291  | 1.252304199 | 0.263112844 | 0.999071534 | Pthr2         | Pthr2         | PTRH2        | 33.82677617 | 30.23792265 | 38.64180648 | 38.78459756 | 28.64632198 | 30.77839432 | 44.91241367 | 27.63298096 | 40.69856334 | 44.96696758 |
| ENSMUSG000000028521  | 0.343730208  | 3.737679619  | 1.251931583 | 0.263183876 | 0.999071534 | Slc35d1       | Slc35d1       | SLC35D1      | 11.22880537 | 8.656346483 | 11.04051614 | 15.19468133 | 14.06155074 | 14.98900527 | 11.38989165 | 11.39860464 | 16.89226085 | 15.42471562 |
| ENSMUSG000000024043  | -0.338254055 | 3.848312362  | 1.251755111 | 0.263217525 | 0.999071534 | Arhgap28      | Arhgap28      | ARHGAP28     | 11.79024564 | 24.78323856 | 13.32940363 | 14.50086027 | 18.44352237 | 16.0804377  | 10.16030108 | 14.92180972 | 7.385453579 | 13.3322876  |
| ENSMUSG000000015095  | -0.361465144 | 4.058856155  | 1.251738554 | 0.263220683 | 0.999071534 | Fbxw5         | Fbxw5         | FBXW5        | 29.26507399 | 23.53814763 | 16.5607742  | 10.33793388 | 17.65869163 | 26.19437815 | 15.07866338 | 8.220811835 | 9.113963991 | 14.05217737 |
| ENSMUSG000000022802  | 0.503971106  | 1.809598182  | 1.250959749 | 0.26336925  | 0.999071534 | Lmln          | Lmln          | LMLN         | 4.070441945 | 2.786632087 | 1.88496617  | 3.191576901 | 2.550699902 | 6.621356699 | 2.265035272 | 3.799534882 | 2.985608894 | 3.92153787  |
| ENSMUSG000000003038  | 0.391984618  | 7.066333425  | 1.250841449 | 0.263391826 | 0.999071534 | Hmgn2         | Hmgn2         | HMGN2        | 101.6206886 | 73.1639148  | 183.4476004 | 161.7990725 | 75.14754327 | 105.2868477 | 156.2227185 | 115.1604481 | 215.1209777 | 108.9533938 |
| ENSMUSG000000071359  | 0.255846448  | 5.985328172  | 1.250788218 | 0.263401985 | 0.999071534 | Tbpl1         | Tbpl1         | TBPL1        | 61.96896962 | 60.4758453  | 53.65421561 | 53.84051468 | 69.84993578 | 52.67980494 | 73.77543457 | 86.97480756 | 55.62660781 | 58.62699116 |
| ENSMUSG000000097148  | 0.645958948  | 1.374162279  | 1.250385864 | 0.263478792 | 0.999071534 | Gm3839        | Gm3839        | GAPDH        | 2.526481208 | 1.067220799 | 2.558168373 | 1.595788451 | 2.289089656 | 0.800383777 | 1.553167044 | 3.868617334 | 4.32127603  | 3.137230296 |
| ENSMUSG000000037514  | 0.226005877  | 5.897019264  | 1.250221666 | 0.263510145 | 0.999071534 | Pank2         | Pank2         | PANK2        | 56.84582717 | 50.15937757 | 68.19538321 | 53.56298626 | 55.65757992 | 77.27341554 | 53.97255476 | 57.33843549 | 56.41229436 | 65.09752865 |
| ENSMUSG000000029372  | -0.44835801  | 3.821376602  | 1.249489745 | 0.263649956 | 0.999071534 | Ppbp          | Ppbp          | PPBP         | 15.79050755 | 19.56571465 | 17.77253817 | 17.06799821 | 13.53833025 | 13.46099988 | 22.13263037 | 11.39860464 | 1.964216377 | 10.26135743 |
| ENSMUSG000000021235  | 0.351999814  | 3.903528562  | 1.24895986  | 0.263751231 | 0.999071534 | Coq6          | Coq6          | COQ6         | 19.79076946 | 11.32439848 | 12.5888812  | 10.40731598 | 13.86534306 | 14.04309717 | 23.62108212 | 9.80970824  | 16.26371161 | 15.49007459 |
| ENSMUSG000000058013  | -0.265963459 | 6.999833414  | 1.248588529 | 0.263822232 | 0.999071534 | 11-Sep        | 11-Sep        | 11-Sep       | 138.9564664 | 159.7273796 | 149.7874903 | 129.0507182 | 148.0713995 | 195.5846902 | 105.2917825 | 84.41875683 | 81.08285206 | 111.6331114 |
| ENSMUSG000000032872  | 0.234061967  | 5.841805458  | 1.248248673 | 0.263887235 | 0.999071534 | Cyb5r4        | Cyb5r4        | CYB5R4       | 56.98618724 | 52.59026939 | 51.2980079  | 53.56298626 | 58.66609775 | 58.06420489 | 81.67070037 | 53.2625708  | 48.24115423 | 56.73158119 |
| ENSMUSG000000017176  | 0.273427667  | 5.272181154  | 1.247503551 | 0.264029822 | 0.999071534 | Nt5c3b        | Nt5c3b        | NT5C3B       | 44.5643213  | 31.00869322 | 33.05422819 | 32.8177364  | 40.0263677  | 39.36432938 | 65.491877   | 37.99534882 | 29.46324566 | 31.56837986 |
| ENSMUSG000000039952  | -0.361930202 | 6.140389518  | 1.247326701 | 0.264063678 | 0.999071534 | Dag1          | Dag1          | DAG1         | 76.77695669 | 150.6560028 | 46.24899137 | 54.39557153 | 85.80816081 | 115.2552639 | 71.51039929 | 58.65100208 | 28.59899046 | 38.16963527 |

|                    |              |              |             |             |             |               |               |           |             |             |             |             |             |             |             |             |             |             |
|--------------------|--------------|--------------|-------------|-------------|-------------|---------------|---------------|-----------|-------------|-------------|-------------|-------------|-------------|-------------|-------------|-------------|-------------|-------------|
| ENSMUSG00000024079 | 0.312455561  | 5.477059692  | 1.246936057 | 0.264138482 | 0.999071534 | Elf2ak2       | Elf2ak2       | EIF2AK2   | 29.40543405 | 32.55023438 | 56.81826597 | 47.24921456 | 38.52210878 | 57.26382112 | 25.56254092 | 41.9330486  | 56.33372571 | 53.20219711 |
| ENSMUSG00000051246 | 0.709538704  | 1.254716969  | 1.246464437 | 0.264228826 | 0.999071534 | Msantd1       | Msantd1       | MSANTD1   | 0.631620302 | 1.600831199 | 1.683005509 | 2.289609516 | 2.681505025 | 1.45524323  | 0.453007054 | 3.868617334 | 4.242707375 | 2.810435474 |
| ENSMUSG00000025239 | 0.310193933  | 6.404351619  | 1.245723248 | 0.264370889 | 0.999071534 | Limd1         | Limd1         | LIMD1     | 68.4255327  | 56.08838201 | 103.7404595 | 91.02932379 | 70.70016909 | 92.99004243 | 53.90783947 | 77.16509932 | 113.0602947 | 104.3129073 |
| ENSMUSG00000019478 | -0.361118627 | 3.41370556   | 1.245647595 | 0.264385394 | 0.999071534 | Rab4a         | Rab4a         | RAB4A     | 10.94808523 | 11.32439848 | 13.73332495 | 14.50086027 | 10.66061754 | 12.36956746 | 9.254286968 | 10.0169556  | 4.085570065 | 9.934562605 |
| ENSMUSG00000075232 | 0.319285685  | 7.425244333  | 1.245288409 | 0.264454277 | 0.999071534 | Amd1          | Amd1          | AMD1      | 178.3976453 | 114.7262359 | 165.3384612 | 163.0479504 | 171.3547114 | 241.5703763 | 275.9460114 | 97.95891749 | 166.1727055 | 146.7308753 |
| ENSMUSG00000032220 | -0.285083373 | 6.26439536   | 1.244607561 | 0.264584909 | 0.999071534 | Myo1e         | Myo1e         | MYO1E     | 77.05767683 | 113.7775952 | 88.99733129 | 62.72142432 | 96.92659629 | 104.5592261 | 48.34232423 | 94.43571242 | 40.0700141  | 55.16296604 |
| ENSMUSG00000035273 | -0.391467876 | 3.897818696  | 1.243743158 | 0.264750874 | 0.999071534 | Hpse          | Hpse          | HPSE      | 18.45734882 | 30.35650274 | 7.80914556  | 13.32136446 | 17.52788651 | 13.67928637 | 15.01394809 | 14.57639746 | 5.578374512 | 13.92145944 |
| ENSMUSG00000028360 | 0.92370144   | 0.007015896  | 1.243578066 | 0.264782586 | 0.999071534 | Slc44a5       | Slc44a5       | SLC44A5   | 0.280720134 | 0.415030311 | 0.942483805 | 0.624438959 | 0.915635862 | 1.673529715 | 0.258861174 | 0.759906976 | 2.514196963 | 0.196076894 |
| ENSMUSG00000037552 | 0.306924258  | 4.70478439   | 1.242938311 | 0.26490552  | 0.999071534 | Plekhg2       | Plekhg2       | PLEKHG2   | 20.77328993 | 23.65672772 | 27.803251   | 16.23541293 | 32.57047567 | 35.43517266 | 15.8552469  | 38.40984353 | 20.11357571 | 29.93440574 |
| ENSMUSG00000044811 | -0.302696107 | 4.811422071  | 1.242333908 | 0.265021727 | 0.999071534 | AF251705      | Cd300c2       | CD300C    | 46.38900217 | 28.75567154 | 33.05422819 | 27.61407841 | 24.78757084 | 28.59552948 | 35.78755729 | 27.14940379 | 12.41384751 | 19.08481764 |
| ENSMUSG00000000743 | -0.260203836 | 6.642347522  | 1.242323844 | 0.265023662 | 0.999071534 | Chmp1a        | Chmp1a        | CHMP1A    | 145.4832095 | 104.172608  | 94.9888309  | 104.4200704 | 116.6781699 | 132.6454205 | 107.8803942 | 73.7109767  | 49.73395868 | 87.58101244 |
| ENSMUSG00000037628 | 0.367720993  | 3.556463189  | 1.242039272 | 0.265078398 | 0.999071534 | Cdkn3         | Cdkn3         | CDKN3     | 12.21132584 | 6.04758453  | 12.38692054 | 9.505348597 | 12.68809695 | 13.6065242  | 19.02629628 | 8.428059192 | 9.899650542 | 12.61428015 |
| ENSMUSG00000029106 | -0.283021464 | 7.313089968  | 1.241909162 | 0.265103429 | 0.999071534 | Add1          | Add1          | ADD1      | 148.641311  | 214.0963504 | 158.9430402 | 159.9257556 | 225.9658503 | 181.3233065 | 110.3395754 | 178.5781394 | 93.41813091 | 137.7113382 |
| ENSMUSG00000069089 | 0.259712345  | 5.676401112  | 1.241517062 | 0.265178879 | 0.999071534 | Cdk7          | Cdk7          | CDK7      | 60.42500888 | 45.94978442 | 44.76794653 | 40.38038601 | 50.29456987 | 60.39259406 | 82.96500624 | 45.59441858 | 42.19136779 | 38.62714802 |
| ENSMUSG00000053178 | 0.668178498  | 1.753441629  | 1.241070059 | 0.265264927 | 0.999071534 | Gm9897        | Mterf1b       | MTERF1    | 3.36864161  | 0.5336104   | 1.144443746 | 6.105625376 | 1.63506404  | 3.638108076 | 2.847472913 | 2.763298096 | 5.342668547 | 4.117614764 |
| ENSMUSG00000041775 | 0.548058208  | 2.866536715  | 1.240350419 | 0.26540353  | 0.999071534 | Mapk1ip1      | Mapk1ip1      | MAPK1IP1L | 4.772242281 | 5.929004441 | 10.03071283 | 4.093544286 | 5.428412612 | 3.419821592 | 2.718042326 | 13.40199576 | 6.521198373 | 13.85610048 |
| ENSMUSG00000039703 | -0.387147574 | 5.535288806  | 1.240283697 | 0.265416386 | 0.999071534 | Nploc4        | Nploc4        | NPLOC4    | 80.00523824 | 74.58687586 | 31.84246422 | 39.2008902  | 48.2016879  | 96.19157753 | 44.20054545 | 24.24794079 | 15.3994564  | 28.1697137  |
| ENSMUSG00000042190 | -0.532827686 | 3.335440279  | 1.24003981  | 0.265463382 | 0.999071534 | Cmklr1        | Cmklr1        | CMKLR1    | 18.38716879 | 14.76322106 | 8.078426441 | 11.37866547 | 8.633138131 | 23.35665385 | 8.607134033 | 2.763298096 | 2.042785033 | 6.470537486 |
| ENSMUSG00000059474 | 0.36477394   | 5.692577535  | 1.239788252 | 0.265511867 | 0.999071534 | Mbtd1         | Mbtd1         | MBTD1     | 28.91417382 | 41.14729082 | 65.56989461 | 47.24921456 | 50.55618011 | 38.12737264 | 26.40383974 | 76.4742748  | 74.48308503 | 52.54860746 |
| ENSMUSG00000021974 | 1.062836056  | 0.686931903  | 1.239256711 | 0.265614352 | 0.999071534 | Fgf9          | Fgf9          | FGF9      | 0.842160403 | 0           | 2.288887492 | 1.665170557 | 0.196207685 | 0.291048646 | 0.323576467 | 1.036236786 | 4.714119306 | 2.483640651 |
| ENSMUSG00000070923 | 0.281505606  | 6.626132868  | 1.238187952 | 0.265820566 | 0.999071534 | Klh9          | Klh9          | KLHL9     | 66.1095916  | 84.90334359 | 92.22870187 | 107.472883  | 110.0071086 | 83.53096143 | 129.6247328 | 117.3710866 | 100.1750352 | 82.41765424 |
| ENSMUSG00000051159 | 1.292440029  | 0.691210234  | 1.237542142 | 0.265945269 | 0.999071534 | Cited1        | Cited1        | CITED1    | 0.701800335 | 0.237160178 | 2.356207712 | 0.069382107 | 1.046440986 | 11.78747017 | 0.19414588  | 0.138164905 | 0           | 0.130717929 |
| ENSMUSG00000027244 | -0.308558231 | 3.949285806  | 1.236200168 | 0.266204633 | 0.999071534 | Atg13         | Atg13         | ATG13     | 22.31725067 | 22.05589652 | 13.86796539 | 14.08456763 | 15.95822503 | 19.8640701  | 11.71346812 | 14.02373784 | 10.52819978 | 10.98030604 |
| ENSMUSG00000036611 | -0.370440049 | 3.194493339  | 1.23564018  | 0.266312955 | 0.999071534 | Eepd1         | Eepd1         | EEPD1     | 6.596923153 | 13.45884008 | 10.38855548 | 10.26855177 | 11.5762534  | 9.895653967 | 9.383717555 | 6.977327692 | 5.814080477 | 6.339819557 |
| ENSMUSG00000032867 | -0.257494469 | 6.04527466   | 1.235259076 | 0.266386706 | 0.999071534 | Fbxw8         | Fbxw8         | FBXW8     | 69.26769311 | 82.17600155 | 85.22739895 | 64.94165173 | 71.28879214 | 108.6339072 | 45.10655956 | 52.29541646 | 43.84130954 | 49.54209509 |
| ENSMUSG00000063522 | 0.804866013  | 0.524712636  | 1.235141918 | 0.266409383 | 0.999071534 | 2010109103Rik | 2010109103Rik |           | 1.052700503 | 0.296450222 | 0.673202203 | 1.110113705 | 1.831271725 | 1.091432423 | 0.19414588  | 2.072473572 | 1.414235792 | 3.137230296 |
| ENSMUSG00000020821 | -0.273274395 | 7.219487486  | 1.235041942 | 0.266428736 | 0.999071534 | Kif1c         | Kif1c         | KIF1C     | 162.5369577 | 227.9109307 | 141.1705021 | 142.8577574 | 173.7746062 | 206.4990144 | 109.6277072 | 122.8976828 | 96.79658308 | 129.9989804 |
| ENSMUSG00000037455 | 0.35921937   | 3.565862016  | 1.235025132 | 0.266431991 | 0.999071534 | Slc18b1       | Slc18b1       | SLC18B1   | 9.825204696 | 10.07930755 | 11.71371834 | 5.966861163 | 16.08903015 | 12.00575665 | 14.8845175  | 14.16190274 | 8.17114013  | 14.50969012 |
| ENSMUSG00000060727 | -0.869307422 | 1.035821581  | 1.234559871 | 0.266522081 | 0.999071534 | Gm12571       | Gm12571       |           | 5.123142449 | 1.719411288 | 1.346404407 | 0.277528426 | 4.578179312 | 2.619437815 | 3.300479967 | 0.345412262 | 0.15713731  | 0.522871716 |
| ENSMUSG00000022967 | -0.301455284 | 5.423035204  | 1.233469171 | 0.266733426 | 0.999071534 | Ifnar1        | Ifnar1        | IFNAR1    | 59.93374864 | 65.93052938 | 31.97710466 | 41.00482497 | 47.28605203 | 63.30308052 | 47.50102541 | 36.1301226  | 18.07079067 | 27.45076509 |
| ENSMUSG00000049550 | -0.244799494 | 6.045266093  | 1.232874055 | 0.26684883  | 0.999071534 | Clip1         | Clip1         | CLIP1     | 60.77590905 | 93.44110999 | 64.42545087 | 67.92508231 | 85.02333007 | 74.36292908 | 48.86004658 | 71.56942068 | 44.15558417 | 54.77081226 |
| ENSMUSG00000078139 | 1.206050713  | -0.027928684 | 1.232610624 | 0.266899934 | 0.999071534 | AK157302      | AK157302      | ISCA1     | 0.210540101 | 1.185800888 | 0.403921322 | 0           | 0.850233301 | 0.436572969 | 1.617882337 | 0           | 0.15713731  | 3.529384083 |
| ENSMUSG00000028292 | 0.451564487  | 3.551376644  | 1.232408697 | 0.266939115 | 0.999071534 | Rars2         | Rars2         | RARS2     | 16.21158775 | 13.69600026 | 5.85685917  | 5.966861163 | 9.548773993 | 19.42749713 | 22.97392919 | 5.319348834 | 6.992610304 | 12.1567674  |
| ENSMUSG00000018481 | 0.235029569  | 5.729924842  | 1.231594081 | 0.267097251 | 0.999071534 | Appbp2        | Appbp2        | APBPB2    | 42.73964043 | 61.48377605 | 47.662716   | 40.72729654 | 60.69357716 | 64.39451295 | 57.33775002 | 64.38484563 | 37.16297386 | 55.68583776 |
| ENSMUSG00000051550 | 0.475700851  | 3.371237578  | 1.231475593 | 0.267120262 | 0.999071534 | Zfp579        | Zfp579        | ZNF579    | 8.281243958 | 7.114805329 | 10.38855548 | 8.395234892 | 9.744981678 | 5.093351307 | 4.141778783 | 14.23098519 | 13.59237733 | 17.84299731 |
| ENSMUSG00000059363 | 0.341752448  | 3.936167562  | 1.2314089   | 0.267133216 | 0.999071534 | Fxn           | Fxn           | FXN       | 14.59744698 | 6.877645151 | 14.60848781 | 19.28822562 | 13.66913537 | 18.26330254 | 18.24971276 | 14.71456236 | 11.70672961 | 19.54233039 |
| ENSMUSG00000030888 | 0.305027711  | 4.948237629  | 1.231210472 | 0.267171759 | 0.999071534 | Rrp8          | Rrp8          | RRP8      | 34.03731627 | 34.03248549 | 30.63070026 | 19.42698983 | 25.31079134 | 54.20781033 | 43.61810781 | 16.02712896 | 26.47763677 | 27.97363681 |
| ENSMUSG00000087436 | -1.040411389 | -0.552392485 | 1.231018086 | 0.267209136 | 0.999071534 | Gm16156       | Gm16156       |           | 1.403600671 | 0.237160178 | 0.875162864 | 0.416292639 | 0.915635862 | 0.291048646 | 0.129430587 | 1.036236786 | 0           | 0.261435858 |
| ENSMUSG00000060427 | 0.278100827  | 4.528301001  | 1.230754579 | 0.267260341 | 0.999071534 | Zfp868        | Zfp868        |           | 18.24680872 | 22.2930567  | 21.67711095 | 22.68794884 | 22.56388375 | 21.82864846 | 21.22661626 | 30.87985622 | 18.77790857 | 27.90827784 |

|                     |              |             |             |             |             |          |          |          |             |              |             |             |             |             |             |             |             |             |
|---------------------|--------------|-------------|-------------|-------------|-------------|----------|----------|----------|-------------|--------------|-------------|-------------|-------------|-------------|-------------|-------------|-------------|-------------|
| ENSMUSG00000033282  | 0.327071046  | 3.57818228  | 1.230593573 | 0.267291633 | 0.999071534 | Rpgrip1l | Rpgrip1l | RPGRIP1L | 9.825204696 | 8.182026128  | 10.23267349 | 12.62754339 | 13.40752513 | 15.35281608 | 13.13720458 | 10.70778012 | 10.92104306 | 13.59466462 |
| ENSMUSG000000021340 | 0.580428556  | 1.307150052 | 1.230546943 | 0.267300697 | 0.999071534 | Gpld1    | Gpld1    | GPLD1    | 1.473780704 | 2.786632087  | 1.95228639  | 0.901967385 | 2.681505025 | 3.34705943  | 3.17104938  | 4.214029596 | 1.021392516 | 2.091486864 |
| ENSMUSG000000033917 | -0.258668206 | 5.774626643 | 1.229857234 | 0.267434804 | 0.999071534 | Gde1     | Gde1     | GDE1     | 60.98644915 | 81.99813141  | 47.59539578 | 53.21607572 | 65.92578209 | 54.6443833  | 42.51794782 | 64.31576318 | 27.34189197 | 54.11722261 |
| ENSMUSG000000043733 | -0.303546873 | 6.549236883 | 1.229692863 | 0.267466777 | 0.999071534 | Ptpn11   | Ptpn11   | PTPN11   | 124.4291995 | 149.6480721  | 70.08034938 | 84.7849342  | 110.0071086 | 159.7857067 | 83.15915212 | 65.76649468 | 42.26993644 | 73.26739921 |
| ENSMUSG00000019917  | 0.307767931  | 5.699594989 | 1.227977045 | 0.267800816 | 0.999071534 | 10-Sep   | 10-Sep   | 10-Sep   | 59.37230838 | 54.78400103  | 34.53527304 | 36.21745962 | 57.03103371 | 57.33658328 | 101.0852884 | 48.08138687 | 27.89187256 | 46.99309548 |
| ENSMUSG000000038122 | 0.388217626  | 3.508588651 | 1.227797231 | 0.267835852 | 0.999071534 |          |          |          | 10.2462849  | 10.96865822  | 8.213066882 | 5.82809695  | 15.76201734 | 11.56918368 | 13.07248928 | 10.98410993 | 15.79229967 | 8.56202435  |
| ENSMUSG000000071657 | -0.296308309 | 4.954738999 | 1.227764122 | 0.267842304 | 0.999071534 | Bsc12    | Bsc12    | BSC12    | 39.58153892 | 20.63293545  | 42.88298036 | 46.69415771 | 25.63780415 | 37.32698886 | 22.00319978 | 23.34986891 | 21.21353688 | 31.69909778 |
| ENSMUSG000000083049 | -0.978222096 | -4.57E-06   | 1.227180606 | 0.267956045 | 0.999071534 | Gm14822  | Gm14822  |          | 1.684320805 | 0.592900444  | 1.413724627 | 1.80393477  | 0.39241537  | 1.164194584 | 1.164875283 | 0.552659619 | 0.078568655 | 0           |
| ENSMUSG000000032525 | 0.277492075  | 5.960791188 | 1.226561367 | 0.268076814 | 0.999071534 | Nktr     | Nktr     | NKTR     | 51.51214462 | 55.55477161  | 65.70453505 | 56.89332737 | 61.80542071 | 62.64822107 | 36.6935714  | 81.03371666 | 68.82614187 | 73.52883507 |
| ENSMUSG000000093561 | 1.016016067  | 0.051538022 | 1.226126776 | 0.268161612 | 0.999071534 | Gm20699  | Gm20699  |          | 0.140360067 | 0.355740266  | 0.269280881 | 1.80393477  | 0.523220493 | 0.145524323 | 0.258861174 | 1.519813953 | 2.435628308 | 1.111102397 |
| ENSMUSG000000054404 | -0.761145841 | 2.207737808 | 1.226026453 | 0.268181192 | 0.999071534 | Slfm5    | Slfm5    | SLFM5    | 9.193584394 | 10.43504782  | 2.692808814 | 3.260959008 | 3.858751134 | 13.67928637 | 2.070889391 | 1.588896405 | 0.392843275 | 0.71894861  |
| ENSMUSG000000031697 | 0.37229294   | 5.411737581 | 1.225460901 | 0.268291604 | 0.999071534 | Orc6     | Orc6     | ORC6     | 52.07358489 | 32.3130742   | 31.03462158 | 40.44976812 | 36.16761656 | 65.0493724  | 95.00205083 | 21.20831288 | 31.11318742 | 24.57497065 |
| ENSMUSG000000013701 | 0.36988684   | 6.730421636 | 1.225367544 | 0.268309836 | 0.999071534 | Timm23   | Timm23   | TIMM23   | 130.8857626 | 63.32176743  | 144.6038333 | 85.68690159 | 55.33056711 | 101.6487396 | 209.3539744 | 76.05978009 | 106.4605277 | 78.56147533 |
| ENSMUSG000000036854 | -0.404226656 | 3.392935869 | 1.225117234 | 0.268358726 | 0.999071534 | Hspb6    | Hspb6    | HSPB6    | 5.474042616 | 16.83837261  | 16.08953266 | 7.63203172  | 15.5004071  | 9.750129644 | 6.989251696 | 10.36236786 | 7.149747614 | 8.823460208 |
| ENSMUSG000000001424 | -0.309806415 | 7.128154637 | 1.225106326 | 0.268360856 | 0.999071534 | Snd1     | Snd1     | SND1     | 165.9757793 | 177.2179427  | 164.665259  | 125.650995  | 172.4011524 | 252.7757491 | 117.1993965 | 97.75167014 | 55.39090184 | 114.0513931 |
| ENSMUSG000000075595 | -0.288643641 | 4.488734264 | 1.224923096 | 0.268396652 | 0.999071534 | Zfp652   | Zfp652   | ZNF652   | 24.0717515  | 32.43165429  | 23.22547602 | 15.61097397 | 32.96289104 | 27.7951457  | 16.04939278 | 19.48125158 | 12.88525944 | 22.74491965 |
| ENSMUSG000000000627 | -0.696675663 | 0.581431851 | 1.224669227 | 0.268446257 | 0.999071534 | Sema4f   | Sema4f   | SEMA4F   | 2.737021308 | 2.54947191   | 1.615685288 | 0.901967385 | 0.981038424 | 1.164194584 | 0.453007054 | 1.72706131  | 1.021392516 | 0.588230681 |
| ENSMUSG000000018707 | -0.306513684 | 7.871822069 | 1.224344741 | 0.268509677 | 0.999071534 | Dync1h1  | Dync1h1  | DYNClH1  | 190.5387911 | 276.8252173  | 282.004403  | 296.5391234 | 294.1153195 | 307.3473703 | 121.7941823 | 199.4410401 | 165.9369996 | 231.958965  |
| ENSMUSG000000038188 | -0.43692977  | 3.135734043 | 1.224337861 | 0.268511022 | 0.999071534 | Scarf1   | Scarf1   | SCARF1   | 14.66762701 | 9.071376794  | 13.06012275 | 8.187088573 | 6.801866406 | 13.75204853 | 9.448432848 | 3.868617334 | 3.142746204 | 7.124127131 |
| ENSMUSG000000040462 | -0.290597449 | 7.152306753 | 1.224205162 | 0.268536963 | 0.999071534 | Os9      | Os9      | OS9      | 141.9742079 | 208.9381165  | 141.7090638 | 142.5108469 | 178.3527855 | 147.7799501 | 113.8989165 | 182.170427  | 68.27616128 | 113.9206751 |
| ENSMUSG000000053091 | 0.382163968  | 2.806523956 | 1.223979217 | 0.26858114  | 0.999071534 | Lins     | Lins1    | LINS1    | 5.474042616 | 6.106874574  | 8.145746661 | 5.273040098 | 5.951633105 | 10.04117829 | 7.24811287  | 6.217420715 | 5.735511822 | 8.758101244 |
| ENSMUSG000000026019 | 0.262314605  | 5.196728324 | 1.223701763 | 0.268635401 | 0.999071534 | Wdr12    | Wdr12    | WDR12    | 39.16045872 | 28.22206114  | 37.90128405 | 31.43009427 | 35.97140888 | 49.33274551 | 42.7120937  | 21.96821986 | 37.7915231  | 41.11078867 |
| ENSMUSG000000031381 | 0.278382337  | 4.446876246 | 1.22347833  | 0.268679107 | 0.999071534 | Piga     | Piga     | PIGA     | 22.8085109  | 23.12311732  | 23.36011646 | 11.72557601 | 21.32123508 | 25.75780518 | 26.14497857 | 20.72473572 | 19.48502646 | 22.74491965 |
| ENSMUSG000000039414 | -0.304429983 | 4.145552661 | 1.22278349  | 0.268815082 | 0.999071534 | Heatr5b  | Heatr5b  | HEATR5B  | 18.52752886 | 23.65672772  | 18.71502126 | 18.45564034 | 21.51744277 | 24.15703763 | 9.577863435 | 18.79042705 | 10.29249382 | 14.83648494 |
| ENSMUSG000000042489 | 0.424443585  | 3.582776098 | 1.22245146  | 0.268880088 | 0.999071534 | Clsn     | Clsn     | CLSPN    | 11.57970553 | 6.936935196  | 14.81044848 | 7.493267507 | 11.90326621 | 31.43325378 | 11.06631518 | 5.733843549 | 10.60676844 | 10.19599846 |
| ENSMUSG000000026478 | -0.320831246 | 6.93147945  | 1.222083978 | 0.268952058 | 0.999071534 | Lamc1    | Lamc1    | LAMC1    | 115.7268753 | 219.5510344  | 120.0319529 | 101.4366398 | 149.5102558 | 204.8982468 | 118.9467094 | 91.53424942 | 51.46246909 | 83.00588492 |
| ENSMUSG000000078183 | -0.441657384 | 2.943035733 | 1.221931021 | 0.268982021 | 0.999071534 | Gm15610  | Gm15610  |          | 10.52700503 | 5.098943819  | 10.03071283 | 10.68484441 | 8.698540692 | 8.003837767 | 10.03087049 | 4.973936572 | 2.199922343 | 6.666614379 |
| ENSMUSG000000032705 | 0.339570027  | 3.832409631 | 1.221624758 | 0.269042028 | 0.999071534 | Exd2     | Exd2     | EXD2     | 10.38664496 | 16.4233423   | 7.741825339 | 13.11321814 | 17.07006858 | 12.6606161  | 16.69654572 | 15.26722198 | 13.35667137 | 17.25476663 |
| ENSMUSG000000006010 | 0.288646388  | 5.028864338 | 1.221485918 | 0.269069237 | 0.999071534 | BC003331 | BC003331 | C1orf27  | 22.31725067 | 37.70846824  | 27.33200946 | 26.01828996 | 38.91452415 | 25.53951869 | 28.28058325 | 43.52194501 | 32.29171725 | 39.47681456 |
| ENSMUSG000000027332 | -0.260898304 | 4.166653222 | 1.221383099 | 0.269089389 | 0.999071534 | Ivd      | Ivd      | IVD      | 31.37047499 | 23.00453723  | 28.74573409 | 25.32446889 | 29.82356809 | 31.14220513 | 19.02629628 | 16.37254122 | 18.38506529 | 23.65994515 |
| ENSMUSG000000042901 | 0.239610155  | 6.749532147 | 1.221170227 | 0.269131117 | 0.999071534 | Aida     | Aida     | AIDA     | 104.9893302 | 95.04194118  | 104.8175831 | 100.4652903 | 106.2791626 | 110.0163882 | 135.9668316 | 109.2884397 | 95.77519056 | 107.9730094 |
| ENSMUSG000000026062 | 0.321700053  | 4.217236367 | 1.219959754 | 0.26936855  | 0.999071534 | Slc9a2   | Slc9a2   | SLC9A2   | 16.70284798 | 17.07553279  | 11.04051614 | 18.0393477  | 22.43307863 | 21.7558863  | 30.22204205 | 19.34308667 | 15.32088774 | 12.81035704 |
| ENSMUSG000000096199 | 0.369427189  | 3.265354849 | 1.219816072 | 0.269396751 | 0.999071534 | Pthrhd1  | Pthrhd1  | PTRHD1   | 8.983044293 | 8.893506661  | 11.04051614 | 6.244389589 | 7.913709953 | 8.658697221 | 11.51932224 | 8.013564478 | 8.799689371 | 14.1828953  |
| ENSMUSG000000039531 | 0.337693189  | 3.745843609 | 1.21940666  | 0.269477127 | 0.999071534 | Zufsp    | Zufsp    | ZUFSP    | 15.08870721 | 12.03587901  | 6.732022034 | 13.66827499 | 13.40752513 | 15.78938905 | 19.8675951  | 11.74401691 | 10.44963113 | 14.24825426 |
| ENSMUSG000000035898 | 0.268089053  | 5.794407229 | 1.219203459 | 0.26951703  | 0.999071534 | Uba6     | Uba6     | UBA6     | 35.93217717 | 66.10839951  | 54.86597958 | 46.55539349 | 57.42344908 | 48.9689347  | 49.57191481 | 68.80612258 | 62.77635542 | 55.16296604 |
| ENSMUSG000000030225 | 0.286536984  | 4.267019449 | 1.218695857 | 0.269616743 | 0.999071534 | Dera     | Dera     | DERA     | 20.70310989 | 16.60121243  | 20.06142566 | 12.62754339 | 19.88237873 | 21.82864846 | 27.37456914 | 19.48125158 | 12.88525944 | 20.84950968 |
| ENSMUSG000000056758 | 0.283591858  | 8.626950541 | 1.218202938 | 0.269713615 | 0.999071534 | Hmga2    | Hmga2    | HMGGA2   | 386.0603645 | 358.2897384  | 409.6435408 | 338.58468   | 358.9946606 | 421.0018666 | 379.8140574 | 350.3171161 | 409.0284184 | 513.9828969 |
| ENSMUSG000000025582 | -1.351717355 | 0.108256407 | 1.218172301 | 0.269719637 | 0.999071534 | Nptx1    | Nptx1    | NPTX1    | 0           | 0.4901013064 | 0.336601102 | 0           | 2.616102464 | 0           | 0.323576467 | 1.519813953 | 0.235705965 | 0.326794823 |
| ENSMUSG000000073402 | -0.778841044 | 3.132716065 | 1.217890314 | 0.269775076 | 0.999071534 | Gm8909   | Gm8909   |          | 21.05401006 | 20.51435536  | 4.308494102 | 4.440454819 | 6.932671529 | 20.2278809  | 9.772009315 | 3.17779281  | 0.392843275 | 0.849666539 |

|                     |              |              |             |             |             |           |           |          |             |             |             |             |             |             |             |             |             |             |
|---------------------|--------------|--------------|-------------|-------------|-------------|-----------|-----------|----------|-------------|-------------|-------------|-------------|-------------|-------------|-------------|-------------|-------------|-------------|
| ENSMUSG00000002458  | 0.273349343  | 4.47506331   | 1.217291605 | 0.269892831 | 0.999071534 | Rgs19     | Rgs19     | RGS19    | 24.21211157 | 16.77908257 | 21.07122897 | 20.60648565 | 21.32123508 | 34.56202672 | 25.49782563 | 18.58317969 | 13.98522061 | 27.32004716 |
| ENSMUSG000000021391 | 0.400367613  | 3.211427549  | 1.217189843 | 0.269912852 | 0.999071534 | Cenpp     | Cenpp     | CENPP    | 7.860163757 | 5.158233863 | 7.472544458 | 11.30928337 | 8.829345815 | 13.75204853 | 15.98467749 | 7.599069763 | 5.814080477 | 8.235229528 |
| ENSMUSG000000041303 | 0.240077386  | 5.060290588  | 1.217100836 | 0.269930365 | 0.999071534 | Gtf3c3    | Gtf3c3    | GTFC3C3  | 28.98435385 | 30.47508283 | 30.02481827 | 35.38487434 | 32.89748848 | 38.85499425 | 33.13423026 | 32.12334036 | 36.14158135 | 31.96053364 |
| ENSMUSG000000025503 | -0.271692954 | 7.095966083  | 1.216824677 | 0.269984712 | 0.999071534 | Taldo1    | Taldo1    | TALD01   | 172.9937827 | 132.216799  | 161.2319277 | 135.5726362 | 175.8674881 | 164.9518202 | 152.598662  | 98.78790692 | 65.52625835 | 131.8290314 |
| ENSMUSG000000035458 | 1.108917048  | 0.148984031  | 1.216744252 | 0.270000541 | 0.999071534 | Tnni3     | Tnni3     | TNNI3    | 0.140360067 | 0.592900444 | 1.279084186 | 0           | 1.308051232 | 0.291048646 | 0.064715293 | 1.036236786 | 2.907040239 | 1.699333077 |
| ENSMUSG000000066721 | 0.620527975  | 8.655215984  | 1.216237202 | 0.270100369 | 0.999071534 | Zfp575    | Zfp575    | ZNF575   | 214.7509026 | 73.10462475 | 470.0970986 | 639.0092013 | 218.9023737 | 177.9034849 | 140.5616174 | 338.5040167 | 935.2812703 | 565.0936071 |
| ENSMUSG000000076068 | 1.506211978  | -0.220812029 | 1.215830007 | 0.27018057  | 0.999071534 | Mir678    | Mir678    |          | 0           | 0           | 1.548365068 | 0.277528426 | 0.196207685 | 0           | 0           | 1.657978857 | 2.514196963 | 0.653589645 |
| ENSMUSG000000024670 | -0.965964884 | 0.234680307  | 1.215821081 | 0.270182328 | 0.999071534 | Cd6       | Cd6       | CD6      | 3.36864161  | 0.889350666 | 2.01960661  | 0.346910533 | 0.588623054 | 1.8918162   | 0.970729402 | 0.27632981  | 0.471411931 | 0           |
| ENSMUSG000000028530 | -0.260050268 | 6.887891469  | 1.215179476 | 0.270308761 | 0.999071534 | Jak1      | Jak1      | JAK1     | 118.3937166 | 173.0083496 | 135.1790024 | 103.1018103 | 141.7927535 | 141.449642  | 92.41343909 | 130.2895052 | 71.34033883 | 92.15613995 |
| ENSMUSG000000028291 | 0.274384602  | 5.873559753  | 1.214369208 | 0.270468534 | 0.999071534 | Akirin2   | Akirin2   | AKIRIN2  | 39.44117885 | 49.74434726 | 66.91629902 | 51.68966938 | 66.97222307 | 55.44476708 | 41.28835724 | 74.81629594 | 63.71917928 | 67.90796412 |
| ENSMUSG000000039621 | -0.391614425 | 4.507551171  | 1.214100069 | 0.270521631 | 0.999071534 | Prex1     | Prex1     | PREX1    | 35.72163707 | 34.03248549 | 25.17776241 | 14.8477708  | 24.46055804 | 49.84208064 | 15.33752455 | 9.187966168 | 10.76390575 | 16.2090232  |
| ENSMUSG000000073640 | 0.826593194  | 1.05145686   | 1.213553385 | 0.270629523 | 0.999071534 | Rpl27-ps3 | Rpl27-ps3 |          | 0.98252047  | 2.193731643 | 0           | 3.122194795 | 0.850233301 | 0.9459081   | 4.46535525  | 2.003391119 | 2.199922343 | 2.091486864 |
| ENSMUSG000000039873 | -0.52134212  | 1.931727382  | 1.213494683 | 0.270641112 | 0.999071534 | Neur12    | Neur12    | NEURL2   | 2.315941107 | 3.913142931 | 5.85685917  | 5.273040098 | 5.035997243 | 2.110102684 | 2.329750565 | 4.283112048 | 1.492804447 | 4.313691657 |
| ENSMUSG000000048007 | 0.35420823   | 4.470143     | 1.212660989 | 0.270805759 | 0.999071534 | Timm8a1   | Timm8a1   | TIMM8A   | 16.84320805 | 19.03210425 | 21.27318963 | 22.61856673 | 20.34019666 | 33.39783214 | 41.93551017 | 13.74740803 | 8.799689371 | 26.01286787 |
| ENSMUSG000000051147 | 0.339587578  | 3.738110321  | 1.212243048 | 0.270888346 | 0.999071534 | Nat2      | Nat2      | NAT2     | 13.12366627 | 10.37575777 | 10.77123525 | 12.07248654 | 14.25775843 | 9.240794513 | 18.24971276 | 13.95465538 | 10.44963113 | 18.56194592 |
| ENSMUSG000000025279 | -0.693931413 | 1.088615062  | 1.212162055 | 0.270904355 | 0.999071534 | Dnase1l3  | Dnase1l3  | DNASE1L3 | 2.17558104  | 5.869714396 | 1.548365068 | 0.346910533 | 2.943115272 | 2.764962138 | 0.906014109 | 1.72706131  | 0.864255206 | 1.30717929  |
| ENSMUSG000000007837 | -0.37645517  | 3.057470946  | 1.212113302 | 0.270913991 | 0.999071534 | Prrg2     | Prrg2     | PRRG2    | 8.281243958 | 11.02794826 | 10.9058757  | 10.33793388 | 7.325086899 | 9.022508029 | 7.636404631 | 6.770080335 | 3.614158135 | 8.104511599 |
| ENSMUSG000000034586 | -0.494770527 | 2.152107009  | 1.211725064 | 0.270990746 | 0.999071534 | Hid1      | Hid1      | HID1     | 4.210802013 | 5.810424352 | 4.779735644 | 6.938210655 | 4.251166504 | 3.783632399 | 1.423736457 | 4.90485412  | 2.199922343 | 5.032640267 |
| ENSMUSG000000039115 | -0.293217143 | 4.346551441  | 1.211675063 | 0.271000633 | 0.999071534 | Itga9     | Itga9     | ITGA9    | 28.63345369 | 30.06005251 | 20.06142566 | 15.74973819 | 21.64824789 | 27.72238354 | 17.34369865 | 13.60924312 | 16.26371161 | 14.05217737 |
| ENSMUSG000000027499 | 0.318104932  | 4.940240216  | 1.211464389 | 0.271042297 | 0.999071534 | Pkia      | Pkia      | PKIA     | 35.23037684 | 22.41163679 | 28.4764532  | 30.04245214 | 24.91837597 | 45.25806447 | 50.54264421 | 17.06336574 | 31.82030531 | 20.39199693 |
| ENSMUSG000000047153 | -0.460073103 | 3.89828291   | 1.210972575 | 0.271139591 | 0.999071534 | Khny1     | Khny1     | KHNYN    | 20.70310989 | 33.79532531 | 11.10783636 | 7.63203172  | 16.48144552 | 17.31739444 | 7.895265804 | 21.20831288 | 3.928432755 | 11.56853672 |
| ENSMUSG000000072872 | -0.250277852 | 5.702157795  | 1.210615517 | 0.271210255 | 0.999071534 | Rybp      | Rybp      | RYBP     | 46.95044244 | 59.9422349  | 72.77315819 | 50.8570841  | 62.52484889 | 71.45244261 | 30.86919499 | 50.08477799 | 36.69156193 | 43.92122415 |
| ENSMUSG000000060438 | 0.637570845  | 0.784960938  | 1.210232343 | 0.271286095 | 0.999071534 | Rps10-ps1 | Rps10-ps1 |          | 0.350900168 | 1.304380977 | 1.346404407 | 1.595788451 | 1.831271725 | 1.382481069 | 2.265035272 | 1.934308667 | 1.414235792 | 2.287563758 |
| ENSMUSG000000080888 | 1.094511799  | 0.573949233  | 1.210108354 | 0.271310664 | 0.999071534 | Gm14387   | Gm14387   |          | 1.894860906 | 1.837991377 | 0           | 0           | 0.784830739 | 2.910486461 | 4.27120937  | 0.898071881 | 0.078568655 | 1.241820326 |
| ENSMUSG000000026778 | -0.563943485 | 0.980320419  | 1.208070495 | 0.271714592 | 0.999071534 | Prkcq     | Prkcq     | PRKCQ    | 2.666841275 | 2.668051998 | 2.01960661  | 1.942698983 | 2.092881971 | 1.964578361 | 1.423736457 | 0.898071881 | 0.785686551 | 2.222204793 |
| ENSMUSG000000041483 | 0.399512044  | 6.72042132   | 1.208033798 | 0.271721873 | 0.999071534 | Zfp281    | Zfp281    | ZNF281   | 55.16150636 | 64.68543845 | 152.143698  | 108.9299073 | 87.44322485 | 76.10922095 | 51.31922773 | 130.4276701 | 163.2656653 | 129.6721856 |
| ENSMUSG000000000751 | 0.416652054  | 6.285146274  | 1.207862818 | 0.271755799 | 0.999071534 | Rpa1      | Rpa1      | RPA1     | 113.7618344 | 72.57101435 | 49.00912041 | 52.73040098 | 60.10495411 | 173.0284201 | 143.5385209 | 29.56728962 | 65.68339566 | 36.60102012 |
| ENSMUSG000000093485 | 1.04375286   | 2.010158527  | 1.207610926 | 0.271805788 | 0.999071534 | Gm20708   | Gm20708   |          | 0           | 0           | 6.260780492 | 4.440454819 | 2.354492217 | 2.110102684 | 1.100159989 | 6.770080335 | 8.642552061 | 5.097999231 |
| ENSMUSG000000021559 | -0.587363584 | 2.03665212   | 1.207378668 | 0.271851892 | 0.999071534 | Dapk1     | Dapk1     | DAPK1    | 8.421604025 | 5.098943819 | 1.750325729 | 5.481186417 | 3.989556257 | 8.003837767 | 3.818202315 | 1.657978857 | 1.492804447 | 1.437897219 |
| ENSMUSG000000031232 | 0.337540205  | 8.037447181  | 1.206953152 | 0.271936383 | 0.999071534 | Magt1     | Magt1     | MAGT1    | 219.1020647 | 160.6167303 | 295.5357673 | 288.9070917 | 234.1411705 | 212.3199873 | 245.4003929 | 273.5665115 | 368.2512864 | 263.5273449 |
| ENSMUSG000000023341 | -0.619883945 | 2.006502533  | 1.206344913 | 0.272057212 | 0.999071534 | Mx2       | Mx2       | MX1      | 1.965040939 | 8.004155995 | 3.366011017 | 7.146356975 | 3.662543449 | 5.311637791 | 2.459181152 | 4.075864691 | 0.31427462  | 3.398666154 |
| ENSMUSG000000028780 | 0.386792754  | 6.271184113  | 1.205791168 | 0.272167275 | 0.999071534 | Sema3c    | Sema3c    | SEMA3C   | 50.03836392 | 95.10123123 | 53.11565385 | 61.12563587 | 88.42426328 | 38.63670777 | 67.88634286 | 170.9790697 | 70.08324035 | 60.97991388 |
| ENSMUSG000000052942 | -0.446471287 | 3.129704461  | 1.205604127 | 0.272204464 | 0.999071534 | Gli3      | Gli3      | GLI3     | 8.351423991 | 16.54192239 | 11.915679   | 4.856747458 | 10.26820217 | 10.4049891  | 3.429910554 | 9.602460883 | 3.8498641   | 8.758101244 |
| ENSMUSG000000038174 | 0.324214036  | 4.198005562  | 1.205439325 | 0.272237236 | 0.999071534 | Fam126b   | Fam126b   | FAM126B  | 10.38664496 | 19.32855448 | 19.92678522 | 13.39074656 | 21.1250274  | 16.15319986 | 16.24353866 | 27.21848624 | 15.71373102 | 21.37238139 |
| ENSMUSG000000027364 | -0.366337396 | 6.696756734  | 1.204541225 | 0.272415919 | 0.999071534 | Usp50     | Usp50     | USP50    | 165.203799  | 49.03286672 | 128.7835815 | 179.1445991 | 77.95985342 | 112.1992531 | 96.87879434 | 47.66689215 | 72.12602538 | 112.7442138 |
| ENSMUSG000000027667 | 0.24059968   | 5.00069942   | 1.204205095 | 0.272482832 | 0.999071534 | Zfp639    | Zfp639    | ZNF639   | 31.37047499 | 24.84252861 | 32.65030687 | 26.22643628 | 37.01784986 | 34.19821592 | 39.41161373 | 34.26489639 | 24.98483232 | 34.11737947 |
| ENSMUSG000000063388 | -0.924994473 | -0.254116323 | 1.204113782 | 0.272501013 | 0.999071534 | BC023105  | BC023105  |          | 1.754500839 | 1.48225111  | 0.538561763 | 0.485674746 | 0.523220493 | 0.800383777 | 0.19414588  | 0.828989429 | 0           | 0.588230681 |
| ENSMUSG000000027353 | 0.371644481  | 3.313022664  | 1.203995931 | 0.272524481 | 0.999071534 | Mcm8      | Mcm8      | MCM8     | 8.91286426  | 6.284744707 | 10.83855548 | 8.950291745 | 9.352566308 | 17.3901566  | 10.35444696 | 7.875399573 | 11.47102364 | 6.862691273 |
| ENSMUSG000000092760 | 0.82618885   | 0.4907261    | 1.203472244 | 0.272628791 | 0.999071534 | Gm23365   | Gm23365   |          | 0.421080201 | 1.007930755 | 1.211763966 | 0.901967385 | 1.177246109 | 2.837724299 | 0.906014109 | 2.832380548 | 0           | 1.699333077 |

|                     |              |              |             |             |             |               |               |             |             |             |             |             |             |             |             |             |             |             |
|---------------------|--------------|--------------|-------------|-------------|-------------|---------------|---------------|-------------|-------------|-------------|-------------|-------------|-------------|-------------|-------------|-------------|-------------|-------------|
| ENSMUSG00000033557  | -0.295658345 | 5.424347794  | 1.203007411 | 0.272721421 | 0.999071534 | Fam20b        | Fam20b        | FAM20B      | 52.63502516 | 58.51927383 | 41.60389617 | 35.66240277 | 57.88126701 | 65.12213456 | 49.11890775 | 34.40306129 | 15.24231909 | 30.26120057 |
| ENSMUSG00000060450  | -0.254834002 | 5.643341843  | 1.202674545 | 0.272787778 | 0.999071534 | Rnf14         | Rnf14         | RNF14       | 67.72373237 | 61.60235614 | 41.26729507 | 59.46046531 | 51.47181598 | 66.65013995 | 57.27303473 | 30.74169132 | 29.62038297 | 40.84935282 |
| ENSMUSG000000031828 | -0.511340718 | 1.644520318  | 1.202277728 | 0.272866909 | 0.999071534 | Klh36         | Klh36         | KLHL36      | 3.719541778 | 3.083082309 | 2.490848153 | 4.648601139 | 4.251166504 | 4.656778337 | 2.135604685 | 1.72706131  | 1.335667137 | 2.548999616 |
| ENSMUSG000000029516 | 0.342836449  | 4.775055347  | 1.201599227 | 0.273002278 | 0.999071534 | Cit           | Cit           | CIT         | 22.3874307  | 16.54192239 | 32.17906532 | 22.2022741  | 31.52403469 | 34.48926456 | 11.84289871 | 41.38038898 | 28.99183373 | 29.15009817 |
| ENSMUSG00000039936  | -0.317297375 | 4.160205839  | 1.201527936 | 0.273016507 | 0.999071534 | Pik3cd        | Pik3cd        | PIK3CD      | 24.35247164 | 20.04003501 | 15.95489222 | 22.54918463 | 19.22835311 | 31.14220513 | 13.39606575 | 14.02373784 | 8.721120716 | 12.61428015 |
| ENSMUSG00000035152  | -0.251886842 | 6.906491338  | 1.201471555 | 0.27302776  | 0.999071534 | Ap2b1         | Ap2b1         | AP2B1       | 134.9562045 | 160.1424099 | 123.2633234 | 122.390036  | 136.4297435 | 156.0020743 | 76.10518513 | 110.1865116 | 90.43252202 | 101.8292667 |
| ENSMUSG00000078349  | -0.674022462 | 0.703587436  | 1.201267226 | 0.273068548 | 0.999071534 | AW011738      | AW011738      |             | 2.17558104  | 2.608761954 | 1.817645949 | 2.22022741  | 0.654025616 | 1.164194584 | 0.711868228 | 2.210638477 | 0.785686551 | 0.653589645 |
| ENSMUSG000000022453 | -0.303788276 | 4.732070641  | 1.200766268 | 0.27316858  | 0.999071534 | Naga          | Naga          | NAGA        | 20.70310989 | 42.4516718  | 28.74573409 | 27.82222473 | 31.98185262 | 22.26522143 | 18.63800452 | 35.30113317 | 14.14235792 | 24.1174579  |
| ENSMUSG000000075569 | 0.854999689  | 0.445949353  | 1.200489569 | 0.273223851 | 0.999071534 | Rsph10b       | Rsph10b       | RSPH10B     | 0.140360067 | 0.889350666 | 0.942483085 | 1.595788451 | 0.981038424 | 0.509335131 | 0.258861174 | 1.796143762 | 2.985608894 | 1.633974113 |
| ENSMUSG000000097621 | 0.852013664  | 0.772229325  | 1.200411675 | 0.273239413 | 0.999071534 | Gm26562       | Gm26562       |             | 1.263240604 | 0.177870133 | 3.096730136 | 0.832585279 | 0.523220493 | 1.164194584 | 0.258861174 | 2.003391119 | 3.69272679  | 2.156845829 |
| ENSMUSG000000031101 | -0.487065296 | 3.219676244  | 1.199974884 | 0.273326698 | 0.999071534 | Sash3         | Sash3         | SASH3       | 20.35220973 | 13.2216799  | 7.607184899 | 6.660682229 | 8.240722761 | 19.13644848 | 6.083237587 | 5.250266382 | 5.578374512 | 3.071871332 |
| ENSMUSG000000063273 | 0.313372385  | 7.550963036  | 1.199269057 | 0.273467819 | 0.999071534 | Naa15         | Naa15         | NAA15       | 146.0446498 | 127.9479158 | 249.8253377 | 179.3527454 | 161.4789246 | 223.3070737 | 162.6942478 | 147.9055306 | 243.1699878 | 208.1683019 |
| ENSMUSG000000026078 | 0.23856637   | 6.203282648  | 1.198895674 | 0.273542509 | 0.999071534 | Pdc3          | Pdc3          | PDCL3       | 64.84635099 | 60.41655525 | 75.93720855 | 72.92059398 | 75.67076377 | 72.39835071 | 89.24238971 | 80.8264693  | 71.89031941 | 65.75111829 |
| ENSMUSG000000045665 | -0.220695093 | 6.303014712  | 1.198788962 | 0.27356386  | 0.999071534 | Mfsd5         | Mfsd5         | MFSD5       | 89.5497228  | 79.50794955 | 94.38294892 | 88.18465742 | 88.48966584 | 94.95462079 | 72.28698282 | 60.6543932  | 56.01945108 | 71.82950199 |
| ENSMUSG000000036990 | 0.249683843  | 6.325458679  | 1.198645725 | 0.273592522 | 0.999071534 | Otud4         | Otud4         | OTUD4       | 72.77669478 | 67.47207054 | 78.56269714 | 73.1287403  | 87.96644535 | 144.7967014 | 68.85707226 | 70.04960673 | 76.997282   | 67.5811693  |
| ENSMUSG000000078185 | 0.331521946  | 3.628544534  | 1.19780574  | 0.273760682 | 0.999071534 | Chml          | Chml          | CHML        | 7.71980369  | 10.5536279  | 12.31960032 | 11.86434022 | 13.66913537 | 13.97033501 | 11.26046107 | 12.64208879 | 14.77090716 | 12.22212636 |
| ENSMUSG000000026430 | -0.283995385 | 4.292602167  | 1.197711122 | 0.273779632 | 0.999071534 | Rassf5        | Rassf5        | RASSF5      | 22.3874307  | 27.98490096 | 20.73462787 | 18.24749402 | 21.90985813 | 25.39399437 | 13.97850339 | 17.82327272 | 9.506807267 | 20.32663796 |
| ENSMUSG000000031734 | -0.616860692 | 1.07925197   | 1.197559454 | 0.273810011 | 0.999071534 | Irx3          | Irx3          | IRX3        | 2.035220973 | 2.134441599 | 3.635291898 | 2.844666369 | 1.700466601 | 2.182864846 | 1.747312924 | 2.625133191 | 0.628549241 | 0.522871716 |
| ENSMUSG000000040407 | 0.300799407  | 4.549612292  | 1.197532349 | 0.273815441 | 0.999071534 | Akap9         | Akap9         | AKAP9       | 14.17636678 | 21.81873634 | 20.93658853 | 26.71211102 | 24.13354523 | 25.53951869 | 17.60255983 | 29.56728962 | 26.55620542 | 22.87563758 |
| ENSMUSG000000078435 | 0.637456022  | 1.524128364  | 1.197336295 | 0.273854718 | 0.999071534 | AU041133      | AU041133      | ZNF788      | 2.877381375 | 2.01586151  | 0.336601102 | 3.81601586  | 2.027479409 | 1.746291877 | 4.077063489 | 2.072473572 | 3.064177549 | 4.836563373 |
| ENSMUSG000000032182 | -0.671247389 | 1.870060113  | 1.197159033 | 0.273890236 | 0.999071534 | Yipf2         | Yipf2         | YIPF2       | 4.631882214 | 4.565333419 | 8.213066882 | 3.81601586  | 1.111843547 | 2.983248622 | 3.753487022 | 2.417885834 | 0.15713731  | 4.24832693  |
| ENSMUSG000000032454 | 0.374984476  | 3.339388976  | 1.197079007 | 0.273906273 | 0.999071534 | Rbp2          | Rbp2          | RBP2        | 9.404124495 | 6.284744707 | 10.03071283 | 8.672763319 | 10.79142266 | 7.348978314 | 10.61330813 | 15.61263424 | 10.05678785 | 9.607767782 |
| ENSMUSG000000029073 | -0.362489275 | 3.734853964  | 1.196669935 | 0.273988268 | 0.999071534 | Gltpd1        | Cptp          | CPTP        | 15.57996745 | 16.12689208 | 14.60848781 | 13.7376571  | 17.07006858 | 22.19245926 | 15.79053161 | 6.286503168 | 6.599767028 | 7.450921954 |
| ENSMUSG000000051675 | -0.313763378 | 4.424040703  | 1.19616642  | 0.274089236 | 0.999071534 | Trim32        | Trim32        | TRIM32      | 13.54474647 | 22.23376665 | 31.37122268 | 27.33654998 | 27.73068612 | 24.52084843 | 12.36062105 | 23.62619872 | 15.24231909 | 16.66653595 |
| ENSMUSG000000074715 | -0.874467585 | -0.306696236 | 1.196013148 | 0.274111998 | 0.999071534 | Cc128         | Cc128         | CCL28       | 0.98252047  | 0.355740266 | 1.009803305 | 1.665170557 | 0.457817931 | 0.800383777 | 0.129430587 | 0.621742072 | 0.15713731  | 0.653589645 |
| ENSMUSG000000030264 | 0.273112656  | 5.289132171  | 1.195758581 | 0.274171052 | 0.999071534 | Thumpd3       | Thumpd3       | THUMPD3     | 51.44196459 | 37.76775829 | 30.42873959 | 28.09975315 | 36.36382425 | 46.64054554 | 58.76148648 | 25.90591965 | 38.42007234 | 36.07814841 |
| ENSMUSG000000044951 | 0.991690421  | -0.109606917 | 1.195735888 | 0.274175606 | 0.999071534 | Mylik4        | Mylik4        | MYLK4       | 0.421080201 | 0.474320355 | 0.740522424 | 1.040731598 | 0.065402562 | 0.363810808 | 0.064715293 | 0.898071881 | 1.335667137 | 2.287563758 |
| ENSMUSG000000033728 | -0.247272412 | 4.923807693  | 1.195563954 | 0.274210107 | 0.999071534 | Lrrc14        | Lrrc14        | LRRC14      | 37.68667801 | 25.85045936 | 39.11304802 | 34.62167117 | 32.83208592 | 37.98184831 | 21.93848449 | 24.04069343 | 21.84208612 | 29.34617506 |
| ENSMUSG000000035021 | 0.350307841  | 6.403465004  | 1.195290525 | 0.274264986 | 0.999071534 | Baz1a         | Baz1a         | BAZ1A       | 58.74068807 | 49.98150744 | 116.1947003 | 89.84982798 | 68.60728711 | 103.3222694 | 45.6242819  | 62.38145451 | 119.8957677 | 116.2082389 |
| ENSMUSG000000024854 | 0.287002375  | 5.447457673  | 1.194869638 | 0.274349489 | 0.999071534 | Pold4         | Pold4         | AP003419.11 | 41.75711996 | 46.89842513 | 33.52546973 | 31.29133005 | 50.94859548 | 27.94067002 | 50.80150538 | 62.24328961 | 36.29871866 | 49.3460182  |
| ENSMUSG000000078202 | -0.359066868 | 3.252172431  | 1.194721487 | 0.274379241 | 0.999071534 | Nrarp         | Nrarp         | NRARP       | 10.17610486 | 11.85800888 | 8.616988204 | 11.10113705 | 13.08051232 | 12.22404314 | 9.901439902 | 5.457513739 | 4.949825271 | 8.300588492 |
| ENSMUSG000000024736 | -0.226998586 | 6.121855643  | 1.194643073 | 0.27439499  | 0.999071534 | Tmem132a      | Tmem132a      | TMEM132A    | 86.88288152 | 68.53929133 | 85.16007873 | 69.10457812 | 80.05273539 | 92.33518297 | 53.45483241 | 59.13457925 | 45.17697668 | 65.22824658 |
| ENSMUSG000000022972 | 0.286265997  | 4.254162456  | 1.193985738 | 0.274527058 | 0.999071534 | 1110004E09Rik | 1110004E09Rik | AP000275.65 | 14.94834714 | 15.29683146 | 20.80194809 | 17.62305506 | 19.88237873 | 16.95358363 | 22.71506801 | 18.99767441 | 16.73512354 | 24.24817583 |
| ENSMUSG000000034206 | 0.501870065  | 2.290195724  | 1.193792083 | 0.274565981 | 0.999071534 | Polq          | Polq          | POLQ        | 3.438821644 | 3.794562842 | 4.308494102 | 4.440454819 | 4.447374189 | 8.003837767 | 4.335924663 | 2.901463001 | 8.799689371 | 2.418281687 |
| ENSMUSG000000020311 | -0.246809817 | 5.453201094  | 1.193649205 | 0.274594702 | 0.999071534 | Erlec1        | Erlec1        | ERLEC1      | 41.96766006 | 60.53513534 | 47.73003622 | 53.35483994 | 41.79223686 | 37.10870238 | 48.27760894 | 42.96928539 | 30.24893221 | 33.65986672 |
| ENSMUSG000000039985 | 0.276691184  | 5.329774916  | 1.193626475 | 0.274599272 | 0.999071534 | Fam60a        | Fam60a        | FAM60A      | 36.00235721 | 41.68090122 | 36.48755943 | 38.99274388 | 34.79416277 | 52.46151846 | 72.09283694 | 32.19242282 | 29.30610835 | 29.15009817 |
| ENSMUSG000000038520 | -0.256702557 | 4.848147261  | 1.193591816 | 0.27460624  | 0.999071534 | Tbc1d17       | Tbc1d17       | TBC1D17     | 34.59875654 | 38.06420851 | 29.35161607 | 27.68346051 | 32.7012808  | 31.21496729 | 16.8259763  | 27.77114586 | 20.27071302 | 30.71871332 |
| ENSMUSG000000040123 | 0.258245034  | 5.077852305  | 1.193179419 | 0.274689167 | 0.999071534 | Zmym5         | Zmym5         | ZMYM5       | 32.49335553 | 32.43165429 | 29.62089695 | 27.33654998 | 37.60647292 | 30.77839432 | 38.37616903 | 49.87753063 | 23.57059653 | 33.79058465 |
| ENSMUSG000000081695 | -0.570527462 | 1.239867415  | 1.193043825 | 0.274716439 | 0.999071534 | Rpsa-ps5      | Rpsa-ps5      |             | 3.719541778 | 1.541541155 | 3.567971678 | 2.636520049 | 2.354492217 | 1.164194584 | 1.100159989 | 2.141556024 | 1.414235792 | 2.679717545 |

|                    |              |              |             |             |             |               |               |                |             |             |             |             |             |             |             |             |             |             |
|--------------------|--------------|--------------|-------------|-------------|-------------|---------------|---------------|----------------|-------------|-------------|-------------|-------------|-------------|-------------|-------------|-------------|-------------|-------------|
| ENSMUSG00000026473 | -0.23962811  | 6.770794055  | 1.19289342  | 0.274746695 | 0.999071534 | Glul          | Glul          | GLUL           | 114.0425545 | 128.0072059 | 115.3195374 | 117.7414348 | 138.3918203 | 139.4123015 | 83.09443683 | 102.5874418 | 63.64061063 | 104.2475484 |
| ENSMUSG00000044317 | -0.522564132 | 1.632993001  | 1.19220969  | 0.274884288 | 0.999071534 | Gpr4          | Gpr4          | GPR4           | 4.56170218  | 4.683913508 | 3.971893    | 2.081463196 | 2.943115272 | 3.783632399 | 3.559341141 | 1.312566595 | 1.414235792 | 2.0261279   |
| ENSMUSG00000074461 | 1.157261401  | -0.556451146 | 1.192158518 | 0.27489459  | 0.999071534 | Gm10699       | Gm10699       |                | 1.122880537 | 0.059290044 | 0.201960661 | 0           | 0.457817931 | 0.072762162 | 0.258861174 | 0.898071881 | 1.335667137 | 0.915025503 |
| ENSMUSG00000074359 | 0.771632826  | 1.079234969  | 1.192028104 | 0.274920845 | 0.999071534 | Psg23         | Psg23         | CEACAM3        | 0.140360067 | 1.363671021 | 2.692808814 | 1.040731598 | 2.419894779 | 0.654859454 | 1.035444696 | 3.799534882 | 3.771295445 | 2.091486864 |
| ENSMUSG00000068246 | -0.313254763 | 4.658281384  | 1.191996308 | 0.274927247 | 0.999071534 | ApoI9b        | ApoI9b        | APOL1          | 25.19463204 | 28.75567154 | 35.47775612 | 27.89160683 | 26.94585538 | 19.2819728  | 11.32517636 | 32.19242282 | 18.14935933 | 25.88214994 |
| ENSMUSG00000059772 | 0.472438494  | 2.916577808  | 1.191663709 | 0.274994223 | 0.999071534 | Slk1b         | Slk1b         | SLX1B          | 4.702062247 | 5.869714396 | 9.492151068 | 4.162926393 | 8.175320199 | 5.384399953 | 4.853647011 | 8.497141644 | 13.43524002 | 7.25484506  |
| ENSMUSG00000018189 | 0.240925699  | 5.634119377  | 1.191265521 | 0.275074434 | 0.999071534 | Uchf5         | Uchf5         | UCHL5          | 36.77433758 | 42.4516718  | 56.07774354 | 48.56747458 | 51.34101085 | 59.44668596 | 61.67367469 | 44.8345116  | 50.9124885  | 41.04542971 |
| ENSMUSG00000029076 | -0.281610441 | 7.069767816  | 1.190973129 | 0.275133352 | 0.999071534 | Sdf4          | Sdf4          | SDF4           | 193.3459924 | 178.3444536 | 137.1312888 | 135.3644899 | 121.6487646 | 156.5114094 | 172.8545489 | 88.63278642 | 77.62583124 | 100.9142412 |
| ENSMUSG00000019428 | -0.264234162 | 7.671390759  | 1.190520281 | 0.275224635 | 0.999071534 | Fkbp8         | Fkbp8         | FKBP8          | 298.1247825 | 215.4007313 | 209.0966044 | 200.3755237 | 234.4027808 | 234.4396844 | 190.2629628 | 161.3766088 | 138.045127  | 180.0639472 |
| ENSMUSG00000036291 | 0.331716651  | 3.524449128  | 1.189731028 | 0.275383818 | 0.999071534 | Ap5m1         | Ap5m1         | AP5M1          | 11.43934547 | 10.5536279  | 11.17515658 | 9.366584384 | 9.810384239 | 11.13261071 | 15.53167044 | 14.99089217 | 8.32827744  | 11.17638293 |
| ENSMUSG00000021731 | 0.260212509  | 5.281011842  | 1.189442167 | 0.275442107 | 0.999071534 | Mrps30        | Mrps30        | MRPS30         | 43.932701   | 28.39993127 | 39.78625022 | 38.36830492 | 32.24346287 | 39.50985371 | 39.15275255 | 33.85040167 | 48.16258558 | 38.95394284 |
| ENSMUSG00000039242 | 0.253149381  | 5.340598863  | 1.189235762 | 0.275483766 | 0.999071534 | B3galnt2      | B3galnt2      | B3GALNT2       | 32.98461576 | 30.89011314 | 42.00781749 | 42.25370289 | 42.64247016 | 38.85499425 | 45.43013602 | 34.81755601 | 46.27693785 | 42.81012175 |
| ENSMUSG00000024302 | 0.442547926  | 3.413709858  | 1.188740187 | 0.275583823 | 0.999071534 | Dtna          | Dtna          | DTNA           | 5.403862583 | 11.14652835 | 5.789538949 | 11.23990126 | 12.62269439 | 9.459080998 | 5.500799946 | 15.54355179 | 15.71373102 | 10.1306395  |
| ENSMUSG00000014075 | 0.302552742  | 5.719121609  | 1.188635727 | 0.275604919 | 0.999071534 | Tctex1d2      | Tctex1d2      | RP11-447L.10.1 | 45.96792197 | 36.048347   | 55.47186156 | 58.07282318 | 47.61306484 | 28.7410538  | 58.63205589 | 67.56263844 | 56.88370629 | 59.28058081 |
| ENSMUSG00000059511 | -0.980889902 | 3.628337659  | 1.188546991 | 0.275622842 | 0.999071534 | Gm20563       | Gm20563       |                | 24.70337181 | 15.65257172 | 10.56927459 | 18.73316877 | 14.51936867 | 9.168032352 | 0           | 12.02034672 | 0           | 19.99984314 |
| ENSMUSG00000021285 | -0.503447506 | 2.655327997  | 1.188537475 | 0.275624763 | 0.999071534 | Ppp1r13b      | Ppp1r13b      | PPP1R13B       | 7.71980369  | 12.56948941 | 4.577774983 | 5.134275885 | 7.717502268 | 10.62327558 | 7.24811287  | 4.144947144 | 1.807079067 | 2.287563758 |
| ENSMUSG00000043065 | 0.395109188  | 3.339751043  | 1.187208865 | 0.275893285 | 0.999071534 | Spice1        | Spice1        | SPICE1         | 8.702324159 | 6.581194929 | 8.549667983 | 10.40731598 | 10.46440986 | 9.531843159 | 5.889091707 | 15.19813953 | 13.35667137 | 9.215613995 |
| ENSMUSG00000039145 | -0.343064271 | 3.495379236  | 1.186945822 | 0.275946487 | 0.999071534 | Camk1d        | Camk1d        | CAMK1D         | 12.49204597 | 15.77115181 | 11.2424768  | 11.03175494 | 14.32316099 | 15.64386473 | 6.924536402 | 8.497141644 | 5.892649132 | 11.89533154 |
| ENSMUSG00000021188 | -0.273905752 | 4.36416626   | 1.186777835 | 0.27598047  | 0.999071534 | Trip11        | Trip11        | TRIP11         | 24.91391191 | 27.80703083 | 18.78234148 | 22.2022741  | 22.69468887 | 28.7410538  | 19.8028798  | 17.54694291 | 11.78529826 | 13.9868184  |
| ENSMUSG00000027487 | 0.403564274  | 2.791947104  | 1.186660782 | 0.276004152 | 0.999071534 | Cdk5rap1      | Cdk5rap1      | CDK5RAP1       | 7.860163757 | 5.632554219 | 4.241173882 | 7.215739081 | 5.363010051 | 8.003837767 | 8.671849326 | 7.322739954 | 3.928432755 | 9.934562605 |
| ENSMUSG00000087396 | 0.495601067  | 3.372532064  | 1.186097643 | 0.276118124 | 0.999071534 | 4933407K13Rik | 4933407K13Rik |                | 5.193322482 | 4.387463286 | 12.05031944 | 11.23990126 | 10.92222779 | 7.057929668 | 3.688771728 | 15.88896405 | 13.43524002 | 15.55543355 |
| ENSMUSG00000036810 | 0.259840347  | 6.173877394  | 1.18592331  | 0.276153418 | 0.999071534 | Cnep1r1       | Cnep1r1       | CNEP1R1        | 53.75790569 | 55.49548157 | 79.84178133 | 78.60992672 | 71.3541947  | 67.30499941 | 79.47038039 | 80.27380968 | 80.1400282  | 64.57465693 |
| ENSMUSG00000036091 | 0.85508358   | 0.466030023  | 1.185675263 | 0.276203646 | 0.999071534 | Hyal3         | Hyal3         | HYAL3          | 0.701800335 | 0.711480533 | 2.086926831 | 0.346910533 | 0.784830739 | 0.218286485 | 0.453007054 | 2.417885834 | 0.785686551 | 3.725460977 |
| ENSMUSG00000054737 | 0.39334117   | 3.265641232  | 1.185653497 | 0.276208054 | 0.999071534 | Zfp182        | Zfp182        | ZNF182         | 4.982782381 | 7.411255551 | 10.29999371 | 7.493267507 | 12.4264867  | 7.130691829 | 11.71346812 | 12.71117124 | 9.585375922 | 9.803844676 |
| ENSMUSG00000034543 | 0.232636426  | 5.502472358  | 1.184918523 | 0.276356952 | 0.999071534 | Morc2a        | Morc2a        | MORC2          | 42.31856023 | 40.91013064 | 44.63330609 | 42.3924671  | 45.45478031 | 65.34042105 | 32.61650791 | 48.15046932 | 40.38428872 | 51.3721461  |
| ENSMUSG00000018858 | 0.271891536  | 5.257369788  | 1.184505341 | 0.276440703 | 0.999071534 | Ict1          | Ict1          | MRPL58         | 40.21315922 | 27.21413038 | 43.690823   | 31.56885848 | 36.82164218 | 36.89041589 | 64.71529348 | 32.39967017 | 29.2275397  | 38.23499424 |
| ENSMUSG00000020857 | 0.345577812  | 10.32688705  | 1.184105657 | 0.276521748 | 0.999071534 | Nme2          | Nme2          | NME2           | 1420.654419 | 773.2607592 | 1271.813603 | 1363.844068 | 1021.78422  | 871.9089815 | 1721.297376 | 1108.635196 | 1675.947982 | 1318.290314 |
| ENSMUSG00000086320 | -0.558802146 | 3.248193264  | 1.183773865 | 0.276589049 | 0.999071534 | Gm12840       | Gm12840       |                | 18.80824899 | 24.54607838 | 5.99149961  | 4.02416218  | 5.166802366 | 12.07851881 | 11.19574577 | 8.220811835 | 2.042785033 | 4.705845444 |
| ENSMUSG00000032093 | -0.897418778 | 0.100815113  | 1.18339939  | 0.276665032 | 0.999071534 | Cd3e          | Cd3e          | CD3E           | 1.263240604 | 2.193731643 | 1.009803305 | 0.416292639 | 1.438856355 | 1.964578361 | 0.19414588  | 0.552659619 | 0           | 0.71894861  |
| ENSMUSG00000052419 | 0.258123199  | 5.988515591  | 1.183326861 | 0.276679752 | 0.999071534 | 2610001J05Rik | 2610001J05Rik | LINC00998      | 56.84582717 | 42.21451162 | 65.23329351 | 74.23885401 | 59.51633105 | 56.02686437 | 76.23461572 | 60.30898094 | 63.87631659 | 71.69878406 |
| ENSMUSG00000024349 | -0.264446721 | 5.472857218  | 1.18315535  | 0.276714564 | 0.999071534 | Tmem173       | Tmem173       | TMEM173        | 64.28491072 | 52.70884948 | 48.20127776 | 36.84189858 | 50.09836218 | 66.35909131 | 46.91858777 | 32.88324734 | 19.64216377 | 36.20886634 |
| ENSMUSG00000040003 | 0.573919184  | 1.154404797  | 1.183107894 | 0.276724197 | 0.999071534 | Magi2         | Magi2         | MAGI2          | 1.403600671 | 1.304380977 | 2.894769475 | 1.387642131 | 1.765869163 | 1.746291877 | 1.68259763  | 2.003391119 | 3.064177549 | 3.267948225 |
| ENSMUSG00000018654 | -0.447249053 | 3.355373531  | 1.182680463 | 0.276810981 | 0.999071534 | Ikzf1         | Ikzf1         | IKZF1          | 15.65014748 | 15.94902195 | 10.09803305 | 7.493267507 | 11.70705853 | 21.02826468 | 8.542418739 | 3.039627905 | 4.399844685 | 7.189486096 |
| ENSMUSG00000030029 | -0.273434951 | 7.055639027  | 1.182296924 | 0.276888883 | 0.999071534 | Lrig1         | Lrig1         | LRIG1          | 146.7464501 | 170.1031374 | 131.7456712 | 152.8487807 | 153.4344095 | 194.7115442 | 135.7726857 | 71.98391539 | 92.08246377 | 101.8292667 |
| ENSMUSG00000031297 | 0.672425814  | 2.821155483  | 1.182213973 | 0.276905735 | 0.999071534 | Slc7a3        | Slc7a3        | SLC7A3         | 4.140621979 | 1.126510844 | 7.607184899 | 10.12978756 | 4.381971627 | 3.34705943  | 1.229590576 | 11.605852   | 13.43524002 | 8.823460208 |
| ENSMUSG00000071470 | 1.108269701  | -0.502926211 | 1.181260956 | 0.277099439 | 0.999071534 | Ccnb1ip1      | Ccnb1ip1      | CCNB1IP1       | 0.280720134 | 0.177870133 | 0           | 0.971349492 | 0.39241537  | 1.45524323  | 0.453007054 | 1.243484143 | 0           | 0.849666539 |
| ENSMUSG00000039763 | -0.781347724 | -0.254665765 | 1.181042701 | 0.277143825 | 0.999071534 | Dnajc28       | Dnajc28       | DNAJC28        | 1.614140771 | 1.007930755 | 0.740522424 | 0.555056852 | 0.719428178 | 1.018670261 | 0.323576467 | 0.345412262 | 0.471411931 | 0.392153787 |
| ENSMUSG00000022194 | 0.260216153  | 6.572895275  | 1.180393612 | 0.277275879 | 0.999071534 | Pabpn1        | Pabpn1        | PABPN1         | 72.35561458 | 71.44450351 | 112.424768  | 89.22538902 | 103.0744371 | 90.80717758 | 84.77703446 | 99.6859788  | 93.88954284 | 124.7049043 |
| ENSMUSG00000019756 | -0.733595481 | 1.962769512  | 1.17981871  | 0.277392906 | 0.999071534 | Prl8a1        | Prl8a1        | PRL            | 2.807201342 | 0.948640711 | 3.231370576 | 12.6969255  | 4.120361381 | 0.582097292 | 1.423736457 | 1.865226215 | 4.16413872  | 4.771204409 |

|                     |              |              |             |             |             |               |               |               |             |             |             |             |             |             |             |             |             |             |
|---------------------|--------------|--------------|-------------|-------------|-------------|---------------|---------------|---------------|-------------|-------------|-------------|-------------|-------------|-------------|-------------|-------------|-------------|-------------|
| ENSMUSG00000039328  | -0.404706872 | 2.595841507  | 1.179728454 | 0.277411284 | 0.999071534 | Rnf122        | Rnf122        | RNF122        | 5.824942784 | 6.699775018 | 9.626791509 | 6.660682229 | 6.082438228 | 7.130691829 | 4.141778783 | 5.802926001 | 2.749902928 | 5.294076125 |
| ENSMUSG000000094724 | -0.511652987 | 5.729089902  | 1.179253368 | 0.277508047 | 0.999071534 | Rnaset2b      | Rnaset2b      | RP11-514O12.4 | 110.1826527 | 81.70168119 | 41.60389617 | 41.14358918 | 50.7523878  | 74.58121556 | 95.06676612 | 13.33291331 | 6.756904338 | 34.70561015 |
| ENSMUSG000000030031 | 0.97235425   | 0.418514136  | 1.17831087  | 0.277700137 | 0.999071534 | Kbtbd8        | Kbtbd8        | KBTBD8        | 1.684320805 | 0.296450222 | 0.740522424 | 0           | 1.569661478 | 4.438491853 | 1.941458804 | 0.483577167 | 1.257098482 | 0.130717929 |
| ENSMUSG000000043991 | 0.335320047  | 6.924256283  | 1.177702121 | 0.277824295 | 0.999071534 | Pura          | Pura          | PURA          | 79.58415804 | 75.06119622 | 145.2097153 | 134.7400509 | 119.1634672 | 95.17290727 | 83.93573564 | 139.2011416 | 168.0583533 | 142.2864657 |
| ENSMUSG000000037487 | -0.272774643 | 6.799479942  | 1.177512363 | 0.277863011 | 0.999071534 | Ubr5          | Ubr5          | UBR5          | 113.2003941 | 157.8893883 | 129.5914242 | 102.0610787 | 130.8705258 | 187.2170416 | 73.71071927 | 95.54103166 | 61.28355098 | 88.5613969  |
| ENSMUSG00000020954  | 0.250797495  | 6.625826678  | 1.177464541 | 0.27787277  | 0.999071534 | Strn3         | Strn3         | STRN3         | 74.88209579 | 82.41316173 | 110.3378411 | 95.88607125 | 103.2052422 | 98.95653967 | 99.85569784 | 104.7289978 | 110.1532544 | 94.8358575  |
| ENSMUSG000000067194 | 0.296529394  | 8.370248736  | 1.176946556 | 0.277978494 | 0.999071534 | Elf1ax        | Elf1ax        | EIF1AX        | 327.9512967 | 272.8527844 | 306.5089632 | 334.9074283 | 295.9465912 | 283.5541435 | 471.5156283 | 297.46904   | 348.0591421 | 329.2784632 |
| ENSMUSG000000060126 | 0.377751523  | 12.2061361   | 1.176913887 | 0.277985164 | 0.999071534 | Tpt1          | Tpt1          |               | 3364.430808 | 4095.163367 | 4472.75544  | 4976.154064 | 4341.095026 | 2033.702415 | 4073.568863 | 6532.022204 | 6062.20029  | 5885.509395 |
| ENSMUSG000000036073 | -0.312605118 | 4.356439186  | 1.17678213  | 0.278012065 | 0.999071534 | Galt          | Galt          | GALT          | 21.5452703  | 17.01624274 | 27.1300488  | 30.45874478 | 20.07858641 | 15.57110257 | 11.84289871 | 18.44501479 | 16.49941757 | 24.05209894 |
| ENSMUSG000000000861 | -0.9743542   | -0.548606852 | 1.176708124 | 0.278027176 | 0.999071534 | Bcl11a        | Bcl11a        | BCL11A        | 1.333420637 | 0.5336104   | 1.413724627 | 0.138764213 | 0.39241537  | 0.509335131 | 0.582437641 | 0.138164905 | 0.471411931 | 0.065358965 |
| ENSMUSG000000002205 | -0.275504391 | 4.636686858  | 1.17641698  | 0.278086636 | 0.999071534 | Vrk3          | Vrk3          | VRK3          | 37.54631794 | 22.70808701 | 24.03331866 | 30.11183424 | 26.2264272  | 32.5246862  | 24.07408917 | 14.23098519 | 15.94943698 | 23.65994515 |
| ENSMUSG000000030592 | -0.951378426 | 0.089937945  | 1.176078389 | 0.278155806 | 0.999071534 | Ryr1          | Ryr1          | RYR1          | 4.280982046 | 0.5336104   | 1.144443746 | 0.069382107 | 0.457817931 | 0.291048646 | 0.647152935 | 1.036236786 | 0.471411931 | 0.522871716 |
| ENSMUSG000000027253 | 0.58990984   | 1.556213351  | 1.175974554 | 0.278177022 | 0.999071534 | Lrp4          | Lrp4          | LRP4          | 2.105401006 | 3.853852886 | 2.356207712 | 1.179495811 | 2.223687094 | 5.529924276 | 3.494625848 | 1.174401691 | 4.635550651 | 1.503256184 |
| ENSMUSG000000028743 | -0.243699326 | 4.930222815  | 1.17582254  | 0.278208087 | 0.999071534 | Akr7a5        | Akr7a5        | AKR7A2        | 34.3180364  | 26.14690958 | 34.06403149 | 37.53571964 | 38.52210878 | 30.63287    | 24.20351976 | 30.67260886 | 19.32788915 | 30.13048264 |
| ENSMUSG000000025532 | 0.353642475  | 4.499535186  | 1.174583405 | 0.278461472 | 0.999071534 | Crcp          | Crcp          | CRCP          | 24.00157147 | 25.37613901 | 19.32090324 | 9.921641237 | 24.85297341 | 32.96125917 | 43.81225369 | 19.34308667 | 10.76390575 | 18.75802281 |
| ENSMUSG000000030766 | -0.306488604 | 4.362123666  | 1.174158116 | 0.278548504 | 0.999071534 | Arhgap17      | Arhgap17      | ARHGAP17      | 21.3347302  | 29.52644211 | 17.77253817 | 23.17362359 | 25.57240158 | 36.09003212 | 13.9137881  | 15.47446934 | 9.978219197 | 16.99333077 |
| ENSMUSG000000059089 | -0.326376962 | 4.045356921  | 1.174154188 | 0.278549308 | 0.999071534 | Fcgr4         | Fcgr4         | FCGR3B        | 27.22985301 | 18.37991377 | 14.47384737 | 12.14186865 | 23.1525068  | 15.57110257 | 14.8845175  | 16.44162367 | 6.835472994 | 17.51620249 |
| ENSMUSG000000041477 | 0.513644068  | 1.814994858  | 1.173983693 | 0.278584208 | 0.999071534 | Dcp1b         | Dcp1b         | DCP1B         | 3.509001677 | 1.956571465 | 3.500651458 | 1.526406344 | 4.120361381 | 4.729540499 | 2.9769035   | 2.072473572 | 4.556981996 | 4.771204409 |
| ENSMUSG000000032607 | 0.530386519  | 2.681311436  | 1.173877567 | 0.278605935 | 0.999071534 | Amt           | Amt           | AMT           | 4.56170218  | 3.735272798 | 8.280387102 | 4.579219032 | 5.559217736 | 4.147443207 | 1.812028217 | 9.118883716 | 10.52819978 | 8.431306421 |
| ENSMUSG000000073096 | -0.542324242 | 2.051514956  | 1.173569344 | 0.278669048 | 0.999071534 | Lrrc61        | Lrrc61        | LRRC61        | 5.474042616 | 5.869714396 | 6.395420932 | 2.914048475 | 4.120361381 | 6.330308052 | 2.006174098 | 3.868617334 | 0.549980586 | 3.92153787  |
| ENSMUSG000000048120 | -0.496155527 | 4.784944753  | 1.173518712 | 0.278679418 | 0.999071534 | Entpd1        | Entpd1        | ENTPD1        | 51.86304479 | 51.76020877 | 21.74443117 | 18.38625824 | 24.32975291 | 54.86266979 | 37.01714787 | 11.26043974 | 4.478413341 | 11.89533154 |
| ENSMUSG000000024777 | -0.237999831 | 5.067092153  | 1.173416186 | 0.278700417 | 0.999071534 | Ppp2r5b       | Ppp2r5b       | PPP2R5B       | 41.05531962 | 38.12349855 | 30.22677893 | 31.49947637 | 47.48225972 | 42.63862665 | 31.90463969 | 27.90931077 | 19.09218319 | 29.67296989 |
| ENSMUSG000000090110 | 0.514651478  | 3.066824227  | 1.173345895 | 0.278714814 | 0.999071534 | Mtcp1         | Cmc4          | CMC4          | 5.403862583 | 3.379532531 | 10.36731393 | 8.256470679 | 7.717502268 | 3.710870238 | 4.788931717 | 9.602460883 | 15.3994564  | 10.32671639 |
| ENSMUSG000000026239 | 0.253794358  | 5.368255207  | 1.173239195 | 0.278736672 | 0.999071534 | Pde6d         | Pde6d         | PDE6D         | 45.75738187 | 35.27757642 | 38.77644692 | 28.37728158 | 47.80927253 | 36.96317805 | 48.08346306 | 56.50944606 | 34.33450228 | 38.36571216 |
| ENSMUSG000000098702 | 0.540235413  | 1.591617947  | 1.173152067 | 0.278754521 | 0.999071534 | RP24-390G17.1 | 1500015A07Rik |               | 2.315941107 | 1.304380977 | 4.577774983 | 2.081463196 | 1.896674286 | 4.729540499 | 1.876743511 | 4.283112048 | 2.121353688 | 3.790819941 |
| ENSMUSG000000050671 | -0.394203355 | 6.093542525  | 1.172836232 | 0.278819237 | 0.999071534 | S100a9        | S100a9        | S100A9        | 122.8150587 | 120.5959503 | 55.00062002 | 63.34586328 | 41.59602918 | 24.81189708 | 102.0560178 | 54.78238475 | 38.81291562 | 59.41129873 |
| ENSMUSG000000021969 | 0.332691949  | 7.776448205  | 1.171996443 | 0.278991405 | 0.999071534 | Zdhhc20       | Zdhhc20       | ZDHHC20       | 176.9238646 | 159.7273796 | 224.8495359 | 256.3668837 | 182.7347571 | 145.1605122 | 217.3139555 | 257.1248878 | 294.7895939 | 217.5146339 |
| ENSMUSG000000018965 | 0.279730324  | 8.17449806   | 1.170977088 | 0.279200566 | 0.999071534 | Ywhah         | Ywhah         | YWHAH         | 238.4015739 | 229.689632  | 280.1867571 | 273.1573535 | 332.375818  | 353.2602942 | 342.0850413 | 243.0320675 | 285.9899046 | 302.2198519 |
| ENSMUSG000000003813 | -0.384070206 | 4.96464194   | 1.170886405 | 0.279219183 | 0.999071534 | Rad23a        | Rad23a        | RAD23A        | 50.45944412 | 38.36065873 | 23.56207712 | 31.43009427 | 39.76475745 | 60.61088055 | 36.24056435 | 19.41216912 | 7.621159544 | 16.07830527 |
| ENSMUSG000000039208 | 0.266302082  | 4.820540036  | 1.170491166 | 0.279300342 | 0.999071534 | Metrl         | Metrl         | METRNL        | 30.73885469 | 33.08384478 | 20.06142566 | 19.77390037 | 29.6273604  | 37.83632399 | 38.05259257 | 31.98517546 | 18.30649664 | 24.64032962 |
| ENSMUSG000000029121 | -0.61244258  | 1.119430713  | 1.170392913 | 0.279320522 | 0.999071534 | Crmp1         | Crmp1         | CRMP1         | 1.824680872 | 3.557402664 | 2.490848153 | 1.665170557 | 3.27012808  | 2.692199976 | 2.070889391 | 2.072473572 | 0.235705965 | 1.045743432 |
| ENSMUSG000000039481 | -0.879534847 | -0.163695963 | 1.169862918 | 0.279429409 | 0.999071534 | Nrtn          | Nrtn          | NRTN          | 1.543960738 | 0.830060622 | 0.740522424 | 1.80393477  | 0.130805123 | 0.727621615 | 0.841298815 | 0.138164905 | 0.549980586 | 0.326794823 |
| ENSMUSG000000021871 | -0.252246038 | 6.663034962  | 1.169760253 | 0.279450508 | 0.999071534 | Pnp           | Pnp           | PNP           | 144.290149  | 99.48869452 | 92.02674121 | 114.5498579 | 121.4525569 | 126.4606367 | 116.9405353 | 80.20472723 | 55.62660781 | 77.25429604 |
| ENSMUSG000000020766 | -0.295474546 | 6.151588929  | 1.168912622 | 0.27962478  | 0.999071534 | Galk1         | Galk1         | GALK1         | 106.743831  | 93.97472039 | 73.10975929 | 60.15428638 | 73.9048946  | 81.78466955 | 104.6446296 | 54.50605494 | 29.62038297 | 45.68591619 |
| ENSMUSG000000074748 | 0.26398141   | 7.237715668  | 1.168401833 | 0.279729864 | 0.999071534 | Atxn7I3b      | Atxn7I3b      | ATXN7I3B      | 130.3945023 | 139.6280546 | 154.0286641 | 128.5650434 | 159.4514452 | 161.4592364 | 125.2240929 | 157.7843213 | 168.9226085 | 169.0182822 |
| ENSMUSG000000006585 | 0.252448184  | 5.315050561  | 1.168268977 | 0.279757205 | 0.999071534 | Cdt1          | Cdt1          | CDT1          | 42.88000049 | 28.87425163 | 41.19997485 | 35.66240277 | 39.5031472  | 71.52520478 | 41.09421136 | 29.36004227 | 36.53442462 | 34.50953326 |
| ENSMUSG000000002341 | 0.863442429  | 0.055882707  | 1.16791372  | 0.27983033  | 0.999071534 | Ncan          | Ncan          | NCAN          | 0.140360067 | 0.592900444 | 1.750325729 | 0.416292639 | 0.457817931 | 0.727621615 | 0.517722348 | 0.552659619 | 1.728510412 | 1.960768935 |
| ENSMUSG000000024109 | -0.887743357 | -0.03908452  | 1.167817831 | 0.279850071 | 0.999071534 | Nrxn1         | Nrxn1         | NRXN1         | 1.19306057  | 0.948640711 | 0.134640441 | 0.416292639 | 3.008517833 | 0.727621615 | 0.647152935 | 0.27632981  | 0.235705965 | 0.980384468 |
| ENSMUSG000000042831 | -0.296628687 | 3.885205196  | 1.167628837 | 0.279888987 | 0.999071534 | Alkbh6        | Alkbh6        | ALKBH6        | 14.45708691 | 16.24547217 | 13.32940363 | 19.56575405 | 20.01318385 | 14.91624311 | 12.16647517 | 13.88557293 | 8.878258026 | 14.11753633 |

|                     |              |              |             |             |             |               |               |             |              |             |             |             |             |             |             |             |             |             |
|---------------------|--------------|--------------|-------------|-------------|-------------|---------------|---------------|-------------|--------------|-------------|-------------|-------------|-------------|-------------|-------------|-------------|-------------|-------------|
| ENSMUSG00000012889  | 0.223087659  | 5.584766364  | 1.167279089 | 0.279961021 | 0.999071534 | Podnl1        | Podnl1        | PODNL1      | 58.67050804  | 44.52682335 | 42.27709837 | 40.65791444 | 43.68891115 | 73.70806962 | 45.6242819  | 43.79827482 | 37.24154252 | 53.26755607 |
| ENSMUSG000000003199 | -0.214938616 | 5.821866638  | 1.166914804 | 0.280036073 | 0.999071534 | Mpnd          | Mpnd          | MPND        | 70.18003354  | 61.18732583 | 59.44375456 | 53.35483994 | 71.48499982 | 61.48402649 | 44.00639957 | 47.11423253 | 42.74134837 | 57.84268359 |
| ENSMUSG000000039911 | -0.243311653 | 6.069722441  | 1.166836986 | 0.280052109 | 0.999071534 | Spsb1         | Spsb1         | SPSB1       | 62.95149009  | 82.94677213 | 91.69014011 | 64.10906645 | 75.93237401 | 94.88185863 | 53.4583241  | 66.11190694 | 36.37728731 | 54.05186365 |
| ENSMUSG000000047757 | 0.429275694  | 3.471904238  | 1.166739481 | 0.280072204 | 0.999071534 | Fancb         | Fancb         | FANCB       | 15.36942735  | 6.344034752 | 9.492151068 | 9.505348597 | 7.848307392 | 18.3360647  | 22.13263037 | 4.90485412  | 8.406846095 | 8.627383315 |
| ENSMUSG000000063787 | 0.312705268  | 6.10347943   | 1.166205347 | 0.280182314 | 0.999071534 | Chchd1        | Chchd1        | CHCHD1      | 78.53145753  | 42.68883197 | 51.02872702 | 85.96443001 | 57.81586445 | 57.99144273 | 125.6123846 | 53.46981815 | 60.8907077  | 66.01255415 |
| ENSMUSG000000039105 | 0.335497349  | 8.223754631  | 1.166173949 | 0.280188788 | 0.999071534 | Atp6v1g1      | Atp6v1g1      | ATP6V1G1    | 227.6640288  | 216.6458223 | 319.9730073 | 328.5936566 | 271.9438511 | 179.9408254 | 317.3637992 | 382.9931161 | 336.9809617 | 339.8666154 |
| ENSMUSG000000028062 | -0.241872078 | 6.434410963  | 1.166062512 | 0.280211768 | 0.999071534 | Lamtor2       | Lamtor2       | LAMTOR2     | 96.91862632  | 74.29042564 | 110.8764029 | 104.9057451 | 97.64602446 | 79.2379939  | 81.67070037 | 69.91144182 | 54.52664664 | 98.29988262 |
| ENSMUSG000000063015 | -0.313457572 | 7.959793077  | 1.165423937 | 0.280343497 | 0.999071534 | Ccni          | Ccni          | CCNI        | 192.2932919  | 372.6972191 | 279.850156  | 276.3489304 | 309.7465317 | 188.2357119 | 166.706596  | 313.2889216 | 162.0871355 | 232.2857599 |
| ENSMUSG000000041959 | 0.368227415  | 9.98805629   | 1.165343684 | 0.280360058 | 0.999071534 | S100a10       | S100a10       | S100A10     | 928.0607636  | 607.7229552 | 975.1333917 | 1272.537216 | 782.7378572 | 570.4553463 | 1142.160215 | 980.7635766 | 1466.248241 | 1108.945551 |
| ENSMUSG000000079508 | 0.441466518  | 4.821930066  | 1.165340819 | 0.280360649 | 0.999071534 | Apoo          | Apoo          | APOO        | 11.01826527  | 12.92522968 | 29.95749805 | 46.48601139 | 21.38663764 | 18.69987551 | 31.96935498 | 30.67260886 | 47.92687961 | 18.95409971 |
| ENSMUSG000000025137 | 0.303510635  | 4.596461209  | 1.164716013 | 0.280489624 | 0.999071534 | Pcvt2         | Pcvt2         | PCYT2       | 19.36968926  | 14.40748079 | 25.37972307 | 24.97755836 | 27.40367331 | 29.10486461 | 16.69654572 | 22.38271458 | 22.70634132 | 37.31996873 |
| ENSMUSG000000045534 | 1.119122643  | -0.288019088 | 1.164530949 | 0.28052784  | 0.999071534 | Kcna5         | Kcna5         | KCNAS       | 0            | 0.415030311 | 0.201960661 | 1.318260024 | 0.261610246 | 1.600767553 | 0.517722348 | 0           | 1.335667137 | 1.176461361 |
| ENSMUSG000000002763 | -0.254958077 | 5.486425479  | 1.164424956 | 0.28054973  | 0.999071534 | Pex6          | Pex6          | PEX6        | 63.30239025  | 53.06458974 | 42.6810197  | 48.91438512 | 44.73535213 | 60.39259406 | 25.88611739 | 34.61030865 | 29.30610835 | 50.65319749 |
| ENSMUSG000000021413 | 0.226105306  | 5.591368686  | 1.164229152 | 0.280590175 | 0.999071534 | Prpf4b        | Prpf4b        | PRPF4B      | 47.23116257  | 50.04079748 | 44.36402521 | 36.56437015 | 52.71446465 | 71.74349126 | 58.63205589 | 47.32147989 | 38.81291562 | 37.77748148 |
| ENSMUSG000000080850 | 1.345386136  | -0.063831728 | 1.163413607 | 0.280758712 | 0.999071534 | Gm12439       | Gm12439       | 0           | 0            | 2.356207712 | 0           | 0.130805123 | 0.509335131 | 0.19414588  | 1.105319238 | 2.671334273 | 0.915025503 |             |
| ENSMUSG000000079505 | 0.487700625  | 2.211855246  | 1.163377501 | 0.280766176 | 0.999071534 | Gm11131       | Gm11131       | 5.895122818 | 4.268883197  | 2.692808814 | 3.469105327 | 3.204725518 | 4.729540499 | 2.847472913 | 3.937699786 | 8.01400282  | 4.901922338 |             |
| ENSMUSG000000036246 | 0.284631247  | 4.461163774  | 1.163275986 | 0.280787164 | 0.999071534 | Gmip          | Gmip          | GMIP        | 27.86147332  | 19.15068434 | 20.86926831 | 14.08456763 | 21.05962483 | 26.33990247 | 15.46695514 | 23.14262155 | 24.04200846 | 26.07822684 |
| ENSMUSG000000044197 | -0.421387304 | 3.526718837  | 1.161776303 | 0.281097455 | 0.999071534 | Gpr146        | Gpr146        | GPRI46      | 16.35194782  | 20.75151554 | 7.87646578  | 9.297202278 | 13.86534306 | 14.84348095 | 11.00159989 | 11.26043974 | 2.357059653 | 9.607767782 |
| ENSMUSG000000028797 | 0.280281486  | 6.88076686   | 1.161399579 | 0.281175469 | 0.999071534 | Tmem234       | Tmem234       | TMEM234     | 103.1646493  | 87.4528155  | 132.284233  | 117.6720527 | 109.8763035 | 92.91728026 | 107.9451095 | 129.3914333 | 144.8806    | 129.2146728 |
| ENSMUSG000000029415 | 0.251435827  | 4.825953194  | 1.161328674 | 0.281190156 | 0.999071534 | Sdad1         | Sdad1         | SDAD1       | 26.94913288  | 25.07968878 | 32.31370576 | 22.13289199 | 27.59988099 | 41.76548071 | 25.49782563 | 23.69528117 | 21.21353688 | 38.69250699 |
| ENSMUSG000000029726 | -0.261646217 | 5.273231772  | 1.161037559 | 0.281250464 | 0.999071534 | Mepce         | Mepce         | MEPCE       | 43.86252096  | 38.24207864 | 39.71893    | 48.56747458 | 47.41685716 | 56.90001031 | 22.32677625 | 30.11994924 | 21.99922343 | 43.07155761 |
| ENSMUSG000000087174 | 0.284585515  | 4.375185541  | 1.161014374 | 0.281255268 | 0.999071534 | 5530601H04Rik | 5530601H04Rik | 19.08896912 | 19.44713457  | 19.92678522 | 19.14946141 | 18.83593774 | 14.91624311 | 23.03864448 | 23.00445665 | 17.75651605 | 29.01938024 |             |
| ENSMUSG000000054715 | -0.531856734 | 1.661364326  | 1.160794699 | 0.281300788 | 0.999071534 | Zscan22       | Zscan22       | ZSCAN22     | 3.509001677  | 4.387463286 | 2.154247051 | 2.983430582 | 5.624620297 | 4.001918884 | 2.459181152 | 3.385040167 | 0.785686551 | 1.764692042 |
| ENSMUSG000000025609 | -0.217104372 | 5.951102236  | 1.160368893 | 0.281389048 | 0.999071534 | Mkl1          | Mkl1          | MKLN1       | 68.0044525   | 76.3655772  | 69.00322585 | 71.39418764 | 59.18931824 | 68.90576696 | 56.94945826 | 57.47660039 | 43.2127603  | 51.24142817 |
| ENSMUSG000000079043 | 0.379192361  | 3.220708548  | 1.160314913 | 0.28140024  | 0.999071534 | Fastkd5       | Fastkd5       | FASTKD5     | 8.983044293  | 10.37575777 | 4.981696305 | 6.799446442 | 10.52981242 | 18.26330254 | 11.26046107 | 8.980718811 | 6.285492408 | 7.25484506  |
| ENSMUSG000000024197 | 0.23077939   | 6.282431494  | 1.159657474 | 0.281536589 | 0.999071534 | Plin3         | Plin3         | PLIN3       | 82.88261961  | 70.02154244 | 64.29081043 | 74.10008979 | 80.05273539 | 74.58121556 | 82.25313801 | 80.75738685 | 79.66861627 | 82.09085942 |
| ENSMUSG000000033960 | -0.255719188 | 5.743754142  | 1.159627369 | 0.281542834 | 0.999071534 | 9430020K01Rik | 9430020K01Rik | KIAA1462    | 42.03784009  | 84.19186306 | 56.27970421 | 59.59922953 | 59.58173361 | 61.70231297 | 32.22821615 | 57.33843549 | 38.73434696 | 46.73165962 |
| ENSMUSG000000047388 | -0.321238565 | 4.116820216  | 1.159568084 | 0.281555134 | 0.999071534 | Atmin         | Atmin         | ATMIN       | 17.54500839  | 21.46299608 | 18.58038081 | 20.74524986 | 20.86341715 | 30.05077271 | 11.26046107 | 14.43823255 | 6.756904338 | 15.22863873 |
| ENSMUSG000000040680 | 0.477791382  | 2.164902849  | 1.15950221  | 0.281568802 | 0.999071534 | Kremen2       | Kremen2       | KREMEN2     | 3.158101509  | 2.490181865 | 6.597381593 | 3.052812688 | 3.597140888 | 4.220205368 | 4.206494076 | 5.872008453 | 6.049786443 | 3.464025119 |
| ENSMUSG000000024137 | 0.346301285  | 4.191155259  | 1.159450577 | 0.281579515 | 0.999071534 | E4f1          | E4f1          | E4F1        | 14.03600671  | 15.71186177 | 22.41763337 | 12.6969255  | 18.18191212 | 15.1345296  | 9.901439902 | 21.96821986 | 22.86347863 | 25.2285603  |
| ENSMUSG000000025607 | -0.29009009  | 4.851622127  | 1.159428393 | 0.281584118 | 0.999071534 | Copg2         | Copg2         | COPG2       | 30.73885469  | 45.41617402 | 30.02481827 | 21.30030671 | 37.67187548 | 38.41842128 | 26.7921315  | 21.41556024 | 11.31388633 | 31.37230296 |
| ENSMUSG000000020459 | 0.262568477  | 4.718459367  | 1.159301073 | 0.281610539 | 0.999071534 | Mtif2         | Mtif2         | MTIF2       | 28.77381375  | 24.36820825 | 19.79214478 | 22.2022741  | 28.84252966 | 21.7558863  | 32.22821615 | 28.18564058 | 22.86347863 | 31.37230296 |
| ENSMUSG000000035104 | 0.497298881  | 1.844492096  | 1.15887245  | 0.281699507 | 0.999071534 | Eva1a         | Eva1a         | EVA1A       | 3.158101509  | 2.193731643 | 3.096730136 | 3.052812688 | 3.400933203 | 3.128772945 | 5.436084652 | 4.697606763 | 4.085570065 | 1.830051006 |
| ENSMUSG000000055900 | 0.353056207  | 3.752035479  | 1.158678237 | 0.281739831 | 0.999071534 | Tmem69        | Tmem69        | TMEM69      | 14.52726694  | 9.071376794 | 16.49345398 | 9.297202278 | 11.5762534  | 14.40690798 | 15.33752455 | 8.289894287 | 18.93504588 | 13.59466462 |
| ENSMUSG000000029426 | -0.298054033 | 6.146360251  | 1.15855019  | 0.281766421 | 0.999071534 | Scarb2        | Scarb2        | SCARB2      | 92.14638404  | 113.421855  | 61.26140051 | 57.37900212 | 82.9304481  | 95.75500456 | 95.13148141 | 48.49588158 | 29.77752028 | 48.36563373 |
| ENSMUSG000000071724 | -0.562131468 | 1.749473402  | 1.15851734  | 0.281773243 | 0.999071534 | Smpd5         | Smpd5         |             | 4.35116208   | 4.624623464 | 3.567971678 | 4.440454819 | 2.943115272 | 0.800383777 | 1.812028217 | 3.246875263 | 3.928432755 | 2.0261279   |
| ENSMUSG000000059013 | -0.363460527 | 3.432410007  | 1.158266686 | 0.281825305 | 0.999071534 | Sh2d3c        | Sh2d3c        | SH2D3C      | 10.0357448   | 10.73149804 | 14.13724627 | 14.43147816 | 12.68809695 | 9.968416129 | 5.371369359 | 8.013564478 | 7.385453579 | 14.31361323 |
| ENSMUSG000000025383 | 0.986207726  | 0.070878817  | 1.158052884 | 0.281869721 | 0.999071534 | Il23a         | Il23a         | IL23A       | 0.070180034  | 0.830060622 | 0.06732022  | 1.942698983 | 0.196207685 | 0.291048646 | 1.229590576 | 2.141556024 | 0.864255206 | 1.241820326 |
| ENSMUSG000000060591 | -0.273202511 | 7.021213685  | 1.157660733 | 0.281951213 | 0.999071534 | Ifitm2        | Ifitm2        | IFITM1      | 112.35822337 | 154.0948254 | 140.9012212 | 141.7476437 | 188.6209876 | 113.2906855 | 161.852949  | 122.0686934 | 69.2975538  | 105.0972149 |

|                     |              |              |             |             |             |               |            |          |             |             |             |             |             |             |             |             |             |             |
|---------------------|--------------|--------------|-------------|-------------|-------------|---------------|------------|----------|-------------|-------------|-------------|-------------|-------------|-------------|-------------|-------------|-------------|-------------|
| ENSMUSG00000078197  | 1.025095259  | 0.434907865  | 1.157592391 | 0.281965417 | 0.999071534 | Gm17374       | Gm17374    |          | 0           | 0.474320355 | 1.817645949 | 1.665170557 | 0.196207685 | 0.509335131 | 0.129430587 | 1.243484143 | 3.299883514 | 2.222204793 |
| ENSMUSG00000013160  | -0.234841693 | 6.308538984  | 1.157320742 | 0.282021889 | 0.999071534 | Atp6vOd1      | Atp6vOd1   | ATP6VOD1 | 85.68982095 | 107.4928505 | 73.78296149 | 75.34896771 | 103.2052422 | 81.27533442 | 77.85249806 | 84.28059192 | 45.25554534 | 65.94719519 |
| ENSMUSG00000022586  | -0.60080481  | 1.042762379  | 1.15705903  | 0.282076308 | 0.999071534 | Ly6i          | Ly6i       |          | 3.789721811 | 3.023792265 | 3.164050356 | 0.901967385 | 1.24264867  | 1.382481069 | 1.164875283 | 1.243484143 | 1.414235792 | 2.091486864 |
| ENSMUSG00000084817  | -0.93702921  | 0.344965231  | 1.15668144  | 0.282154845 | 0.999071534 | Gm5526        | Gm5526     |          | 0.210540101 | 2.312311732 | 0.942483085 | 1.665170557 | 2.550699902 | 0.363810808 | 1.48845175  | 1.72706131  | 0.078568655 | 0.065358965 |
| ENSMUSG00000022498  | 0.253537889  | 5.071194121  | 1.156179324 | 0.282259327 | 0.999071534 | Txndc11       | Txndc11    | TXNDC11  | 37.40595788 | 31.06798327 | 32.51566643 | 23.03485937 | 35.31738326 | 40.74681045 | 41.80607959 | 21.41556024 | 32.99883514 | 38.88858388 |
| ENSMUSG00000022855  | 0.223551505  | 5.575483321  | 1.156038115 | 0.282288718 | 0.999071534 | Senp2         | Senp2      | SENP2    | 49.61728371 | 55.02116121 | 43.82546344 | 33.16464693 | 47.15524691 | 65.84975618 | 57.20831944 | 43.79827482 | 39.83430813 | 43.39835243 |
| ENSMUSG00000066036  | -0.252568653 | 6.269447634  | 1.155573056 | 0.282385545 | 0.999071534 | Ubr4          | Ubr4       | UBR4     | 80.1455983  | 90.83234803 | 76.40845009 | 85.20122684 | 102.3550089 | 95.75500456 | 39.79990549 | 81.58637628 | 52.95527354 | 73.33275817 |
| ENSMUSG00000034653  | 0.411173562  | 3.151756099  | 1.155485167 | 0.282403849 | 0.999071534 | Ythdc2        | Ythdc2     | YTHDC2   | 8.702324159 | 8.774926572 | 5.385617627 | 8.117706466 | 8.044515076 | 10.84156207 | 13.07248928 | 4.144947144 | 12.17814154 | 7.320204025 |
| ENSMUSG00000083007  | -0.498240777 | 1.683245152  | 1.155347658 | 0.282432489 | 0.999071534 | Gm13623       | Gm13623    |          | 4.140621979 | 3.735272798 | 3.769932339 | 2.983430582 | 4.120361381 | 1.673529715 | 2.78275762  | 2.348803381 | 1.335667137 | 4.117614764 |
| ENSMUSG00000066595  | 0.270116567  | 4.645270216  | 1.155131847 | 0.282477445 | 0.999071534 | Mfsd7b        | Mfsd7b     | FLVCR1   | 22.94887097 | 20.57364541 | 22.8215547  | 23.17362359 | 27.73068612 | 33.90716727 | 37.98787727 | 20.86290062 | 14.45663254 | 27.18932923 |
| ENSMUSG00000050022  | -0.505733219 | 2.24210308   | 1.153939974 | 0.282725891 | 0.999071534 | Amz1          | Amz1       | AMZ1     | 6.105662918 | 8.419186306 | 4.847055865 | 4.717983245 | 3.924153696 | 6.69411886  | 2.070889391 | 5.18118393  | 0.942823861 | 4.313691657 |
| ENSMUSG00000048967  | -0.584952523 | 1.475726175  | 1.153717067 | 0.282772387 | 0.999071534 | Yjefn3        | Yjefn3     | YJEFN3   | 4.421342113 | 3.083082309 | 2.221567271 | 2.358991623 | 4.51277675  | 1.236956746 | 0.582437641 | 2.279720929 | 2.592765618 | 3.137230296 |
| ENSMUSG00000042680  | -0.789523935 | 0.407379727  | 1.153227693 | 0.282874498 | 0.999071534 | Garem         | Garem      | GAREM1   | 3.509001677 | 2.608761954 | 0.605881983 | 0.693821065 | 0.457817931 | 1.236956746 | 1.423736457 | 0.967154334 | 0.235705965 | 0.457512752 |
| ENSMUSG00000071068  | -0.780018714 | 0.853772893  | 1.152862161 | 0.2829508   | 0.999071534 | TremI2        | TremI2     | TREML2   | 2.666841275 | 1.719411288 | 2.827449254 | 2.428373729 | 1.24264867  | 3.34705943  | 0.841298815 | 0.345412262 | 0           | 1.960768935 |
| ENSMUSG00000053889  | 0.783154297  | 0.078032767  | 1.152575279 | 0.283010702 | 0.999071534 | A130066N16Rik | Kirre13os  |          | 0.421080201 | 0.5336104   | 1.346404407 | 0.138764213 | 1.111843547 | 1.309718907 | 0.647152935 | 1.934308667 | 0.864255206 | 0.915025503 |
| ENSMUSG00000031320  | -0.315613573 | 10.73077969  | 1.152209134 | 0.283087178 | 0.999071534 | Rps4x         | Rps4x      | RPS4X    | 2672.596037 | 2262.330224 | 1495.787976 | 1614.937912 | 1774.502301 | 2022.205993 | 2203.296882 | 1185.316718 | 747.1093413 | 1365.414127 |
| ENSMUSG00000003299  | -0.28310873  | 4.269851938  | 1.152190501 | 0.28309107  | 0.999071534 | MrpI4         | MrpI4      | MRPL4    | 24.70337181 | 21.40370603 | 23.29279624 | 15.61097397 | 24.72216828 | 26.12161599 | 20.8383245  | 14.92180972 | 9.428238612 | 14.70576701 |
| ENSMUSG000000001313 | -0.277480908 | 4.739695403  | 1.152095786 | 0.283110858 | 0.999071534 | Rnd2          | Rnd2       | RND2     | 38.94991862 | 27.33271047 | 23.4947569  | 29.97307003 | 31.72024237 | 23.79322682 | 30.99862558 | 18.58317969 | 13.27810271 | 30.71871332 |
| ENSMUSG00000034781  | 0.240107918  | 6.38384481   | 1.152081815 | 0.283113777 | 0.999071534 | Gna11         | Gna11      | GNA11    | 70.39057364 | 76.42486724 | 83.61171366 | 65.84361911 | 101.7009833 | 96.70091266 | 63.74456408 | 93.05406337 | 83.67561768 | 95.750883   |
| ENSMUSG00000024427  | -0.474112133 | 3.184721121  | 1.151974349 | 0.28313623  | 0.999071534 | Spry4         | Spry4      | SPRY4    | 9.755024662 | 17.31269297 | 12.18495988 | 4.926129565 | 10.26820217 | 15.93491337 | 9.707294022 | 5.319348834 | 1.807079067 | 5.94766577  |
| ENSMUSG00000047534  | 0.370216301  | 3.663688274  | 1.151692474 | 0.283195136 | 0.999071534 | Mis18bp1      | Mis18bp1   | MIS18BP1 | 10.59718506 | 5.158233863 | 18.24377971 | 10.33793388 | 12.4264867  | 20.59169171 | 15.98467749 | 8.980718811 | 9.899650542 | 14.37897219 |
| ENSMUSG00000078794  | -0.515653408 | 1.991163128  | 1.151688149 | 0.28319604  | 0.999071534 | Dact3         | Dact3      | DACT3    | 3.509001677 | 7.174095373 | 2.962089695 | 6.244389589 | 3.400933203 | 6.69411886  | 2.523896446 | 3.246875263 | 1.178529826 | 2.483640651 |
| ENSMUSG00000048100  | -0.235814574 | 5.785199509  | 1.151531224 | 0.28322884  | 0.999071534 | Taf13         | Taf13      | TAf13    | 70.03967347 | 45.23830388 | 63.75224866 | 73.40626873 | 55.26516455 | 51.29732387 | 58.89091707 | 42.20937841 | 38.498641   | 53.398274   |
| ENSMUSG00000075486  | 0.29680384   | 5.1473864    | 1.150993654 | 0.28334124  | 0.999071534 | Commdd6       | Commdd6    | COMMD6   | 40.07279915 | 31.00869322 | 25.58168373 | 29.27924896 | 39.1761344  | 32.08811323 | 67.56276639 | 36.75186467 | 24.27771443 | 27.51612406 |
| ENSMUSG00000030494  | 0.536282993  | 1.744866561  | 1.150619016 | 0.283419605 | 0.999071534 | Rhpn2         | Rhpn2      | RHPN2    | 2.245761073 | 2.845922132 | 1.750325729 | 3.330341114 | 3.466335765 | 2.40115133  | 2.006174098 | 4.075864691 | 5.735511822 | 3.33330719  |
| ENSMUSG00000027076  | 0.380211247  | 4.445185522  | 1.150046948 | 0.283539322 | 0.999071534 | Timm10        | Timm10     | TIMM10   | 31.86173523 | 13.45884008 | 15.5509709  | 18.31687613 | 18.77053518 | 29.90524839 | 46.91858777 | 10.63869767 | 12.57098482 | 21.30702243 |
| ENSMUSG00000052688  | -0.317485907 | 3.825696818  | 1.149963053 | 0.283556884 | 0.999071534 | 5430435G22Rik | Rab7b      | RAB7B    | 17.82572852 | 18.67636399 | 10.29999371 | 14.08456763 | 20.34019666 | 14.11585934 | 16.56711513 | 11.81309936 | 7.385453579 | 11.30710086 |
| ENSMUSG00000040021  | 0.241919036  | 6.216300935  | 1.149949779 | 0.283559663 | 0.999071534 | Lats1         | Lats1      | LATS1    | 56.21420687 | 66.70129996 | 80.24570265 | 64.94165173 | 85.08873264 | 85.93211276 | 62.38554291 | 87.87287945 | 79.51147896 | 68.4961948  |
| ENSMUSG00000027635  | 0.368245452  | 3.114341905  | 1.149617612 | 0.283629211 | 0.999071534 | Dsn1          | Dsn1       | DSN1     | 5.333682549 | 7.885575906 | 8.213066882 | 9.85225913  | 7.128879214 | 13.82481069 | 11.51932224 | 6.839162787 | 7.306884924 | 7.777716776 |
| ENSMUSG00000049037  | -0.438949338 | 3.414365638  | 1.149301605 | 0.283695396 | 0.999071534 | Clec4a1       | Clec4a1    | CLEC4A   | 15.72032751 | 18.73565403 | 7.943786    | 6.03624327  | 15.10799173 | 18.48158903 | 11.00159989 | 6.217420715 | 3.142746204 | 6.993409202 |
| ENSMUSG00000022200  | -0.245073855 | 6.928309492  | 1.149183363 | 0.283720166 | 0.999071534 | Golph3        | Golph3     | GOLPH3   | 116.3584956 | 152.1382539 | 146.6907601 | 111.358281  | 160.3016785 | 141.013069  | 88.85409795 | 125.2464862 | 86.81836388 | 99.8031388  |
| ENSMUSG00000022504  | -0.709889081 | 1.58089444   | 1.148681348 | 0.28382536  | 0.999071534 | Ciita         | Ciita      | CIITA    | 6.877643287 | 5.217523908 | 2.760129034 | 0.346910533 | 3.466335765 | 5.966497245 | 1.229590576 | 1.657978857 | 1.728510412 | 0.522871716 |
| ENSMUSG00000028718  | 0.423953298  | 2.661813753  | 1.148658018 | 0.283831759 | 0.999071534 | Stil          | Stil       | STIL     | 5.263502516 | 4.328173242 | 6.260780492 | 3.191576901 | 8.633138131 | 11.27813504 | 9.060141087 | 5.802926001 | 3.771295445 | 5.555511983 |
| ENSMUSG00000021474  | 0.210992844  | 5.624382772  | 1.148053834 | 0.283956921 | 0.999071534 | Sfxn1         | Sfxn1      | SFXN1    | 46.31882214 | 45.65333419 | 52.17317076 | 40.58853233 | 52.4528544  | 66.79566428 | 55.97872886 | 44.76542915 | 41.24854393 | 48.62706959 |
| ENSMUSG00000061488  | -1.017574013 | -0.361699181 | 1.14744886  | 0.28408383  | 0.999071534 | RpI27a-ps1    | RpI27a-ps1 |          | 1.824680872 | 1.363671021 | 0.134640441 | 0.971349492 | 0.196207685 | 0.072762162 | 0.582437641 | 0.483577167 | 0.707117896 | 0.065358965 |
| ENSMUSG00000030488  | -0.305960192 | 8.242167894  | 1.147166126 | 0.284143165 | 0.999071534 | Hdlbp         | Hdlbp      | HDLBP    | 340.0924425 | 491.0994378 | 281.6004817 | 243.4618119 | 390.714903  | 432.2800016 | 224.691499  | 287.8665791 | 150.6946805 | 254.115654  |
| ENSMUSG00000061207  | 0.276013844  | 4.305224343  | 1.147109603 | 0.284155029 | 0.999071534 | Stk19         | Stk19      | STK19    | 22.73833087 | 15.59328168 | 18.37842015 | 14.77838869 | 21.05962483 | 18.62711335 | 23.94465859 | 18.30684988 | 21.29210553 | 20.0652021  |
| ENSMUSG00000026918  | 0.349249591  | 6.338458377  | 1.146529803 | 0.284276763 | 0.999071534 | Brd3          | Brd3       | BRD3     | 62.24968975 | 42.62954193 | 106.9045099 | 82.35656047 | 73.0546613  | 78.2920858  | 37.59958551 | 79.30665535 | 108.424744  | 120.9140843 |
| ENSMUSG00000026017  | 0.376597053  | 3.276492553  | 1.146491848 | 0.284284735 | 0.999071534 | Carf          | Carf       | CARF     | 8.632144126 | 7.648415729 | 5.722218729 | 10.96237283 | 10.07199449 | 7.785551283 | 10.61330813 | 11.32952219 | 12.2567102  | 8.627383315 |

|                    |              |              |             |             |             |             |             |             |             |             |              |             |             |             |             |             |             |             |
|--------------------|--------------|--------------|-------------|-------------|-------------|-------------|-------------|-------------|-------------|-------------|--------------|-------------|-------------|-------------|-------------|-------------|-------------|-------------|
| ENSMUSG00000053358 | 0.833733023  | -0.07602345  | 1.146042043 | 0.284379224 | 0.999071534 | Gm9905      | Gm9905      |             | 0.350900168 | 0.355740266 | 0.673202203  | 1.040731598 | 0.588623054 | 0.800383777 | 0.258861174 | 0.759906976 | 0.628549241 | 2.61435858  |
| ENSMUSG00000023572 | -0.227850212 | 5.21032508   | 1.145909955 | 0.284406979 | 0.999071534 | Ccndbp1     | Ccndbp1     | CcNDBP1     | 44.70468137 | 41.97735144 | 38.43984582  | 40.17223969 | 41.33441893 | 33.68888078 | 28.99245148 | 40.13690484 | 27.26332332 | 33.26771293 |
| ENSMUSG00000078762 | 0.320137927  | 3.779231729  | 1.144905538 | 0.284618144 | 0.999071534 | Haus5       | Haus5       | HAU55       | 12.42186594 | 8.004155995 | 12.52156098  | 16.37417715 | 13.14591488 | 21.68312413 | 12.23119047 | 13.47107822 | 13.67094599 | 12.54892118 |
| ENSMUSG00000038692 | 0.480069646  | 2.145789081  | 1.144787457 | 0.284642982 | 0.999071534 | Hoxb4       | Hoxb4       | HOXB4       | 2.456301174 | 3.083082309 | 6.597381593  | 3.122194795 | 3.335530641 | 4.29296753  | 3.106334087 | 4.283112048 | 6.049786443 | 5.16947841  |
| ENSMUSG00000079316 | 0.343104659  | 6.48900943   | 1.144727932 | 0.284655504 | 0.999071534 | Rab9        | Rab9        | RAB9A       | 67.23247213 | 74.29042564 | 90.41105592  | 94.2902828  | 82.66883786 | 39.80090235 | 76.49347689 | 132.845556  | 118.6386692 | 92.94044753 |
| ENSMUSG00000038644 | 0.271982434  | 4.840015882  | 1.144727724 | 0.284655548 | 0.999071534 | Pold1       | Pold1       | POLD1       | 37.05505771 | 21.04796576 | 27.06272858  | 23.24300569 | 26.03021952 | 52.24323197 | 25.10953387 | 21.20831288 | 27.73473525 | 27.45076509 |
| ENSMUSG00000028088 | -0.801041769 | 0.607816367  | 1.144615872 | 0.284679079 | 0.999071534 | Fmo5        | Fmo5        | FMO5        | 1.614140771 | 1.541541155 | 1.817645949  | 1.734552664 | 2.419894779 | 1.964578361 | 1.617882337 | 1.4507315   | 0           | 0.130717929 |
| ENSMUSG00000095930 | -0.514454126 | 1.583329595  | 1.144567719 | 0.28468921  | 0.999071534 | Nim1        | Nim1k       | NIM1K       | 2.526481208 | 3.260952442 | 4.375814322  | 3.538487434 | 3.727946011 | 2.110102684 | 2.588611739 | 3.937699786 | 1.021392516 | 1.764692042 |
| ENSMUSG00000096780 | -0.707539676 | 2.788725766  | 1.144470372 | 0.284709693 | 0.999071534 | Tmem181b-ps | Tmem181b-ps |             | 14.87816711 | 11.14652835 | 2.827449254  | 13.39074656 | 0.981038424 | 12.22404314 | 8.283557565 | 0.690824524 | 2.278490998 | 3.202589261 |
| ENSMUSG00000021486 | -0.266126653 | 8.440073548  | 1.143782254 | 0.284854535 | 0.999071534 | Prelid1     | Prelid1     | PRELID1     | 395.6750291 | 347.7954005 | 399.61828279 | 399.9878443 | 423.8085991 | 438.3920232 | 304.6796017 | 306.0352641 | 195.6359512 | 311.17403   |
| ENSMUSG00000088945 | -1.023980372 | 4.392596002  | 1.143773633 | 0.28485635  | 0.999071534 | Gm20459     | Pakap       | PALM2-AKAP2 | 33.475876   | 48.43996628 | 32.91958775  | 0           | 32.76668336 | 13.16995124 | 0.129430587 | 43.31469765 | 4.792687961 | 5.097999231 |
| ENSMUSG00000089911 | 0.234336489  | 6.065158676  | 1.14368589  | 0.284874826 | 0.999071534 | Hiat1       | Mfsd14a     | MFSD14A     | 67.09211207 | 61.36519596 | 59.84767588  | 62.72142432 | 67.88785894 | 80.98428577 | 101.6677261 | 58.37467227 | 51.38390043 | 59.4766577  |
| ENSMUSG00000030465 | -0.393604243 | 2.943195277  | 1.143138231 | 0.284990179 | 0.999071534 | Psd3        | Psd3        | PSD3        | 6.73728322  | 9.308536972 | 8.280387102  | 12.00310443 | 7.913709953 | 10.98708639 | 4.983077598 | 5.319348834 | 3.35589479  | 7.843075741 |
| ENSMUSG00000028864 | -0.448432548 | 5.262405718  | 1.143066889 | 0.28500521  | 0.999071534 | Hgf         | Hgf         | HGF         | 49.33656358 | 90.95092812 | 25.37972307  | 23.93682676 | 41.59602918 | 42.05652936 | 68.59821109 | 24.86968286 | 8.32827744  | 18.69266385 |
| ENSMUSG00000041747 | 0.233876837  | 4.849786665  | 1.143036662 | 0.285011579 | 0.999071534 | Utp15       | Utp15       | UTP15       | 26.73859278 | 26.44335981 | 27.93789144  | 23.65929833 | 32.50507311 | 44.74872934 | 27.8275762  | 27.63298096 | 21.92065477 | 30.65335435 |
| ENSMUSG00000028164 | -0.358580363 | 4.289180043  | 1.142546386 | 0.285114906 | 0.999071534 | Manba       | Manba       | MANBA       | 25.40517214 | 26.38406976 | 21.74443117  | 20.67586775 | 19.16295055 | 28.23171867 | 29.63960441 | 7.806317121 | 8.01400282  | 12.09140843 |
| ENSMUSG00000090467 | 1.7504165    | 1.130049459  | 1.142196902 | 0.285188589 | 0.999071534 | Gm4613      | Gm4613      |             | 3.789721811 | 1.126510844 | 0            | 0           | 0           | 15.78938905 | 2.394465859 | 0           | 0           | 0           |
| ENSMUSG00000064317 | 0.337209704  | 6.287098436  | 1.141703854 | 0.285292582 | 0.999071534 | Gm10146     | Gm10146     | LSM7        | 98.74330719 | 26.97697021 | 74.99472546  | 85.61751948 | 70.17694859 | 62.64822107 | 122.9590576 | 63.34860885 | 68.74757321 | 98.23452365 |
| ENSMUSG00000042549 | 0.560763465  | 1.278580317  | 1.141617893 | 0.285310718 | 0.999071534 | Gm16516     | Map2k3os    |             | 0.912340436 | 1.363671021 | 2.692808814  | 2.081463196 | 2.550699902 | 2.110102684 | 3.17104938  | 1.4507315   | 2.749902928 | 3.529384083 |
| ENSMUSG00000032841 | -0.514419015 | 1.812880341  | 1.141453005 | 0.28534551  | 0.999071534 | Prr5l       | Prr5l       | PRR5L       | 6.035482885 | 5.217523908 | 5.049016526  | 1.665170557 | 2.812310149 | 4.147443207 | 2.847472913 | 2.348803381 | 1.178529826 | 3.33330719  |
| ENSMUSG00000021265 | -0.378476772 | 2.624769015  | 1.141433017 | 0.285349727 | 0.999071534 | Slc25a29    | Slc25a29    | SLC25A29    | 6.73728322  | 8.004155995 | 6.126140051  | 7.354503294 | 7.128879214 | 5.457162114 | 4.206490476 | 5.319348834 | 4.871256616 | 5.294076125 |
| ENSMUSG00000053617 | -0.250950995 | 6.66963651   | 1.141096872 | 0.285420672 | 0.999071534 | Sh3pxd2a    | Sh3pxd2a    | SH3PXD2A    | 103.3751894 | 152.4939942 | 108.0489536  | 96.371746   | 114.5198854 | 157.3845554 | 75.06974044 | 76.75060461 | 66.46908221 | 85.94703832 |
| ENSMUSG00000000531 | -0.326916631 | 3.697857675  | 1.140600441 | 0.285525487 | 0.999071534 | Grasp       | Grasp       | GRASP       | 15.22906728 | 16.54192239 | 10.50195437  | 16.23541293 | 15.63121222 | 13.89757285 | 10.09558578 | 15.61263424 | 5.499805857 | 10.91494707 |
| ENSMUSG00000035671 | -0.314902399 | 4.500147018  | 1.140536766 | 0.285538935 | 0.999071534 | Zswim4      | Zswim4      | ZSWIM4      | 29.47561409 | 33.85461536 | 21.40783007  | 15.33344555 | 30.41219114 | 27.72238354 | 13.52549634 | 29.08371246 | 10.37106247 | 18.30051006 |
| ENSMUSG00000022708 | 0.520031157  | 6.318916059  | 1.140100258 | 0.285631144 | 0.999071534 | Zbtb20      | Zbtb20      | ZBTB20      | 26.87895285 | 33.380295   | 97.9509206   | 106.6402978 | 70.70016909 | 46.13121041 | 18.37914335 | 94.98837204 | 149.201876  | 115.2278544 |
| ENSMUSG00000053062 | -0.537912581 | 1.869863955  | 1.140010548 | 0.285650099 | 0.999071534 | Jam2        | Jam2        | JAM2        | 6.105662918 | 6.877645151 | 2.827449254  | 2.497755836 | 3.466335765 | 3.056010784 | 3.688771728 | 4.283112048 | 1.885647722 | 0.980384468 |
| ENSMUSG00000061039 | -0.823012495 | 0.224930283  | 1.13997003  | 0.28565866  | 0.999071534 | Olfir920    | Olfir920    |             | 1.543960738 | 0.5336104   | 1.615685288  | 2.01208109  | 1.111843547 | 0.145524323 | 0.19414588  | 0.828989429 | 0.549980586 | 1.764692042 |
| ENSMUSG00000024194 | -0.23888603  | 6.194287791  | 1.139412913 | 0.285776416 | 0.999071534 | Cuta        | Cuta        | CUTA        | 91.37440367 | 57.8077933  | 91.28621878  | 91.79252696 | 77.37123037 | 80.98428577 | 57.33775002 | 56.44036361 | 51.77674371 | 79.7379367  |
| ENSMUSG00000023832 | 0.266189832  | 4.853998036  | 1.139384899 | 0.285782339 | 0.999071534 | Acat2       | Acat2       | ACAT2       | 30.10723439 | 19.26926443 | 23.96599844  | 30.31998056 | 31.91645006 | 44.02110772 | 39.92933608 | 21.13923043 | 22.15636074 | 27.64684199 |
| ENSMUSG00000059461 | 0.827542558  | 1.539250371  | 1.138148118 | 0.28604398  | 0.999071534 | Gm7331      | Gm7331      |             | 0           | 0.415030311 | 5.587578288  | 1.526406344 | 2.87771271  | 2.037340523 | 1.876743511 | 3.661369977 | 5.028393926 | 3.790819941 |
| ENSMUSG00000020974 | 0.411460002  | 3.919989947  | 1.138127265 | 0.286048394 | 0.999071534 | Pole2       | Pole2       | POLE2       | 18.87842902 | 9.664277238 | 10.29999371  | 13.18260024 | 14.97718661 | 26.55818896 | 33.7166679  | 8.151729382 | 7.778296855 | 9.934562605 |
| ENSMUSG00000068263 | 1.036487709  | -0.253937608 | 1.138052527 | 0.286064215 | 0.999071534 | Efcc1       | Efcc1       | EFCC1       | 0.140360067 | 0.059290044 | 1.144443746  | 0.693821065 | 0.39241537  | 0.145524323 | 0.19414588  | 0.414494714 | 1.885647722 | 1.699333077 |
| ENSMUSG00000036864 | 0.473287729  | 2.048311794  | 1.137886188 | 0.28609943  | 0.999071534 | BC053749    | Proser3     | PROSER3     | 2.947561409 | 3.557402664 | 4.847055865  | 2.497755836 | 3.597140888 | 4.947826984 | 1.941458804 | 5.802926001 | 4.00700141  | 5.686229912 |
| ENSMUSG00000036278 | -0.344694975 | 3.746178909  | 1.137319617 | 0.286219419 | 0.999071534 | Macrodl     | Macrodl     | MACROD1     | 17.33446828 | 18.49849386 | 11.98299922  | 11.72557601 | 17.98570444 | 10.4049891  | 6.342098761 | 15.19813953 | 8.485414751 | 15.75151045 |
| ENSMUSG00000021916 | 0.292815308  | 5.916249409  | 1.137262315 | 0.286231558 | 0.999071534 | Gltr8d1     | Gltr8d1     | GLT8D1      | 39.93243909 | 44.52682335 | 62.00192293  | 73.68379716 | 59.12391568 | 37.54527535 | 66.98032875 | 65.83557713 | 67.96188666 | 72.15629681 |
| ENSMUSG00000048373 | 0.653722532  | 0.791530775  | 1.136804592 | 0.286328547 | 0.999071534 | Fgfbp1      | Fgfbp1      | FGFBP1      | 1.614140771 | 0.889350666 | 0.673202203  | 1.942698983 | 1.308051232 | 1.964578361 | 3.688771728 | 1.381649048 | 1.807079067 | 0.588230681 |
| ENSMUSG00000049106 | -0.261860677 | 4.851818616  | 1.136097194 | 0.286478523 | 0.999071534 | Dcaf5       | Dcaf5       | DCAF5       | 34.5285765  | 39.66503971 | 29.95749805  | 29.97307003 | 28.71172454 | 36.16279428 | 15.72581632 | 31.08710358 | 18.30649664 | 26.86253441 |
| ENSMUSG00000038936 | 0.242206307  | 5.442874588  | 1.135773103 | 0.286547267 | 0.999071534 | Sccpdh      | Sccpdh      | SCCPDH      | 44.00288103 | 43.87463286 | 34.46795281  | 41.21297129 | 42.77327528 | 37.83632399 | 62.64440409 | 46.76882027 | 35.82730672 | 42.15653211 |
| ENSMUSG00000057191 | -0.386453213 | 3.302374217  | 1.135688205 | 0.286565279 | 0.999071534 | AB124611    | AB124611    | C19orf38    | 21.68563036 | 8.419186306 | 7.87646578   | 9.921641237 | 9.614176555 | 11.49642152 | 10.67802342 | 6.286503168 | 5.028393926 | 8.169870563 |

|                    |              |              |             |             |             |               |               |            |             |             |             |             |             |             |             |             |             |             |
|--------------------|--------------|--------------|-------------|-------------|-------------|---------------|---------------|------------|-------------|-------------|-------------|-------------|-------------|-------------|-------------|-------------|-------------|-------------|
| ENSMUSG00000015087 | 0.29669132   | 6.770011245  | 1.135514627 | 0.286602108 | 0.999071534 | Rab16         | Rab16         | RABL6      | 95.58520568 | 67.8278108  | 133.4286767 | 110.1094031 | 99.21568594 | 102.5218856 | 77.399491   | 108.873945  | 145.5877179 | 128.6264421 |
| ENSMUSG00000036053 | -0.242545279 | 4.864415258  | 1.135260886 | 0.286655958 | 0.999071534 | Fmn12         | Fmn12         | FMN12      | 29.05453389 | 37.41201802 | 29.68821717 | 33.37279325 | 33.42070898 | 30.99668081 | 19.73816451 | 28.25472303 | 24.6705577  | 14.18281687 |
| ENSMUSG00000022562 | -0.44347258  | 3.758161382  | 1.135100785 | 0.286689942 | 0.999071534 | Oplah         | Oplah         | OPLAH      | 15.93086761 | 29.58573216 | 9.155549966 | 11.58681179 | 14.25775843 | 6.257545891 | 6.665675228 | 22.10638477 | 6.442629718 | 12.48356222 |
| ENSMUSG00000046994 | 0.376367566  | 3.291393163  | 1.135079544 | 0.286694451 | 0.999071534 | Mars2         | Mars2         | MARS2      | 9.965564763 | 8.893506661 | 7.405224238 | 7.146356975 | 10.39900729 | 17.60844309 | 16.04939278 | 6.562832977 | 7.621159544 | 6.405178521 |
| ENSMUSG00000040269 | 0.26581892   | 4.97449073   | 1.134567271 | 0.286803224 | 0.999071534 | Mrps28        | Mrps28        | MRPS28     | 32.70389563 | 19.44713457 | 33.18886863 | 34.20537853 | 27.53447843 | 29.32315109 | 43.10038546 | 26.80399153 | 28.5204218  | 36.01278944 |
| ENSMUSG00000078452 | 0.812005928  | 0.784284494  | 1.13370348  | 0.286986756 | 0.999071534 | Raet1d        | Raet1d        |            | 0.842160403 | 1.007930755 | 0           | 0.901967385 | 3.27012808  | 2.546675653 | 2.718042326 | 0.967154334 | 0.707117896 | 3.137230296 |
| ENSMUSG00000027770 | 0.240021002  | 6.59763288   | 1.133430454 | 0.287044798 | 0.999071534 | Dhx36         | Dhx36         | DHX36      | 69.61859327 | 94.3897507  | 107.5103919 | 88.46218585 | 100.0005167 | 100.1934964 | 101.8618719 | 103.5545961 | 101.589271  | 91.96006306 |
| ENSMUSG00000000194 | -0.258864246 | 5.277590518  | 1.1334281   | 0.287045298 | 0.999071534 | Gpr107        | Gpr107        | GPR107     | 46.17846207 | 56.32554219 | 31.57318334 | 41.69864604 | 43.16569065 | 50.56970226 | 44.26526074 | 34.74847355 | 20.50641898 | 24.24817583 |
| ENSMUSG00000032562 | -0.272809073 | 8.485413908  | 1.133104501 | 0.287114111 | 0.999071534 | Gnai2         | Gnai2         | GNAI2      | 403.886093  | 446.8097747 | 396.7180585 | 323.4593807 | 471.6178717 | 467.7151743 | 288.3066325 | 360.0577419 | 201.1357571 | 285.6840339 |
| ENSMUSG00000037032 | -0.2880942   | 4.470876687  | 1.132959988 | 0.287144848 | 0.999071534 | Apbb1         | Apbb1         | APBB1      | 23.08923104 | 29.40786203 | 21.27318963 | 21.57783514 | 30.80460651 | 15.4983404  | 15.59638573 | 25.49142493 | 13.35667137 | 25.2285603  |
| ENSMUSG00000029464 | 0.281929882  | 4.452046477  | 1.132934526 | 0.287150264 | 0.999071534 | Gpn3          | Gpn3          | GNP3       | 27.22985301 | 19.56571465 | 18.04181905 | 18.52502245 | 18.77053518 | 23.28389169 | 34.04024437 | 19.34308667 | 20.74212495 | 17.32012559 |
| ENSMUSG00000085028 | 0.501091325  | 2.159615437  | 1.132570688 | 0.287222767 | 0.999071534 | Slc2a4rg-ps   | Slc2a4rg-ps   |            | 4.491522147 | 2.608761954 | 4.981696305 | 2.89609516  | 4.381971627 | 3.783632399 | 2.006174098 | 5.18118393  | 4.32127603  | 8.888819173 |
| ENSMUSG00000073130 | 0.993895078  | -0.43633602  | 1.13233882  | 0.287277014 | 0.999071534 | Gm1141        | Gm1141        |            | 0.280720134 | 0.177870133 | 1.211763966 | 0.277528426 | 0.196207685 | 0.072762162 | 0.323576467 | 1.174401691 | 1.414235792 | 0.71894861  |
| ENSMUSG00000031901 | 0.319395001  | 3.917703553  | 1.131529137 | 0.287449406 | 0.999071534 | Dus2l         | Dus2          | DUS2       | 18.03626862 | 17.25340292 | 7.539864678 | 10.6154623  | 16.15443271 | 15.64386473 | 18.18499747 | 15.40538688 | 15.00661312 | 15.35935666 |
| ENSMUSG00000003072 | -0.263549999 | 7.875764235  | 1.130976973 | 0.287567045 | 0.999071534 | Atp5d         | Atp5d         | ATP5D      | 309.9852082 | 215.9343417 | 270.7619262 | 239.0213571 | 296.4698117 | 254.1582302 | 241.905767  | 173.6732853 | 163.8156459 | 205.0310717 |
| ENSMUSG00000020623 | -0.371873261 | 3.507512407  | 1.130669447 | 0.28763259  | 0.999071534 | Map2k6        | Map2k6        | MAP2K6     | 10.17610486 | 14.70393101 | 12.65620142 | 10.75422652 | 17.72409419 | 7.203453991 | 10.80745401 | 15.54355179 | 4.949825271 | 8.692742279 |
| ENSMUSG00000021118 | 0.842023135  | 0.038783031  | 1.130658254 | 0.287634976 | 0.999071534 | Plek2         | Plek2         | PLEK2      | 0.771980369 | 1.126510844 | 1.077123525 | 0           | 0.39241537  | 0.873145938 | 1.423736457 | 0.690824524 | 1.414235792 | 1.045743432 |
| ENSMUSG00000051517 | 0.426014895  | 3.014983215  | 1.12974103  | 0.287830584 | 0.999071534 | Arhgef39      | Arhgef39      | ARHGEF39   | 11.43934547 | 2.54947191  | 5.116336746 | 8.04832436  | 8.109917638 | 11.42365936 | 7.506974044 | 7.046410144 | 8.642552061 | 9.477049853 |
| ENSMUSG00000028907 | 0.239731912  | 6.298319051  | 1.129534195 | 0.287874718 | 0.999071534 | Utp11l        | Utp11l        | UTP11      | 65.26743119 | 65.04117817 | 97.88360038 | 73.47565084 | 71.68120751 | 74.36292908 | 82.44728389 | 78.33950101 | 79.98289089 | 89.86857619 |
| ENSMUSG00000030035 | -0.261095015 | 4.234309306  | 1.12904983  | 0.287978103 | 0.999071534 | Wbp1          | Wbp1          | WBP1       | 20.21184966 | 18.73565403 | 20.06142566 | 22.89609516 | 23.74112986 | 20.44616739 | 18.31442805 | 16.23437631 | 10.92104306 | 17.25476663 |
| ENSMUSG00000037904 | -0.348128629 | 3.180603026  | 1.128640372 | 0.288065536 | 0.999071534 | Ankrd9        | Ankrd9        | ANKRD9     | 9.544484562 | 7.944865951 | 11.98299922 | 9.366584384 | 13.14591488 | 8.658697221 | 5.889091707 | 8.428059192 | 7.149747614 | 7.646998847 |
| ENSMUSG00000079242 | 0.620776551  | 1.534987049  | 1.128038018 | 0.28819422  | 0.999071534 | C730034F03Rik | C730034F03Rik |            | 1.19306057  | 1.422961066 | 4.577774983 | 2.358991623 | 1.700466601 | 1.819054038 | 1.229590576 | 3.45412262  | 2.435628308 | 6.993409202 |
| ENSMUSG00000047721 | 0.349022248  | 6.949359576  | 1.126747597 | 0.288470147 | 0.999071534 | Bola2         | Bola2         | BOLA2B     | 132.6402634 | 60.65371543 | 127.5718175 | 153.5426018 | 85.02333007 | 85.2772533  | 123.6709258 | 102.8637716 | 183.7770843 | 143.2014912 |
| ENSMUSG00000043885 | 0.314937665  | 3.886889985  | 1.126663928 | 0.288488049 | 0.999071534 | Slc36a4       | Slc36a4       | SLC36A4    | 15.08870721 | 15.59328168 | 7.80914556  | 14.98653501 | 14.32316099 | 17.89949173 | 20.06174098 | 11.88218181 | 15.00661312 | 13.46394669 |
| ENSMUSG00000044022 | 0.837885925  | 0.096225951  | 1.12591872  | 0.288647561 | 0.999071534 | Pcdhb21       | Pcdhb21       |            | 1.263240604 | 0.5336104   | 0.201960661 | 0.20814632  | 1.308051232 | 2.037340523 | 0.647152935 | 1.657978857 | 0.15713731  | 1.568615148 |
| ENSMUSG00000033653 | -0.289328754 | 4.237397969  | 1.125739452 | 0.288685949 | 0.999071534 | Vps8          | Vps8          | VPS8       | 16.98356812 | 31.36443349 | 18.98430214 | 17.13738032 | 22.76009144 | 23.64770249 | 14.75508691 | 18.92859196 | 9.978219197 | 15.88222837 |
| ENSMUSG00000024474 | -0.236123155 | 6.15966365   | 1.125683715 | 0.288697886 | 0.999071534 | Ik            | Ik            | IK         | 63.79365049 | 87.86784581 | 91.55549966 | 63.90092013 | 94.57210407 | 85.78658843 | 52.22524184 | 69.08245239 | 41.71995586 | 73.00596335 |
| ENSMUSG00000096433 | 0.269923751  | 4.415543728  | 1.125654179 | 0.288704212 | 0.999071534 | Gm4944        | Gm4944        |            | 17.26428825 | 20.57364541 | 20.5326672  | 16.72108768 | 24.98377853 | 19.8640701  | 25.56254092 | 29.01463001 | 16.02800564 | 21.04558657 |
| ENSMUSG00000082746 | -1.005937711 | -0.149920098 | 1.125421032 | 0.288754153 | 0.999071534 | Rps12-ps1     | Rps12-ps1     |            | 1.333420637 | 0.770770577 | 0.06732022  | 2.497755836 | 0.588623054 | 0           | 0.711868228 | 0.345412262 | 0.785686551 | 0.457512752 |
| ENSMUSG00000023571 | -0.538130494 | 1.645875252  | 1.12495034  | 0.288855009 | 0.999071534 | Fam132a       | Fam132a       | FAM132A    | 4.000261912 | 4.861783641 | 4.510454763 | 2.705902155 | 2.354492217 | 2.837724299 | 1.035444696 | 2.486968286 | 3.614158135 | 1.503256184 |
| ENSMUSG00000024501 | -0.286673706 | 7.733296857  | 1.124659507 | 0.288917349 | 0.999071534 | Dpysl3        | Dpysl3        | DPYSL3     | 185.7665488 | 233.1877447 | 321.2520915 | 249.0123804 | 220.34123   | 317.0247378 | 144.3798198 | 154.4683636 | 154.8588192 | 176.0116914 |
| ENSMUSG00000021022 | 0.23297297   | 5.345004942  | 1.124421338 | 0.288968413 | 0.999071534 | Ppp2r3c       | Ppp2r3c       | PPP2R3C    | 39.72189898 | 40.79155055 | 31.30390246 | 40.58853233 | 40.876601   | 40.091951   | 55.91401357 | 44.00552217 | 32.29171725 | 38.62714802 |
| ENSMUSG00000026971 | 0.760576358  | 0.78998665   | 1.124352758 | 0.28898312  | 0.999071534 | Itgb6         | Itgb6         | ITGB6      | 0.561440268 | 0.652190488 | 1.88496617  | 2.428373729 | 0.588623054 | 1.018670261 | 0.582437641 | 1.105319238 | 4.16413872  | 2.222204793 |
| ENSMUSG00000022617 | 0.319378401  | 6.398121513  | 1.124313746 | 0.288991485 | 0.999071534 | Chkb          | Chkb          | CHKB-CPT1B | 70.53093371 | 53.47962006 | 100.8456901 | 85.75628369 | 76.91341244 | 58.93735083 | 50.21906774 | 107.4232135 | 95.61805325 | 125.4892118 |
| ENSMUSG00000063954 | 0.471344514  | 3.869563542  | 1.124245059 | 0.289006216 | 0.999071534 | Hist2h2aa1    | Hist2h2aa2    | HIST2H2AA3 | 6.667103186 | 15.29683146 | 10.16535327 | 12.97445392 | 17.92030188 | 4.656778337 | 7.571689337 | 24.59335305 | 20.11357571 | 19.93448417 |
| ENSMUSG00000037493 | -0.516822153 | 1.665503476  | 1.123576807 | 0.289149576 | 0.999071534 | Cib2          | Cib2          | CIB2       | 3.579181711 | 2.668051998 | 4.173853661 | 5.966861163 | 1.962076848 | 2.619437815 | 2.912188207 | 2.003391119 | 2.749902928 | 1.633974113 |
| ENSMUSG00000032334 | -0.27480583  | 5.218761457  | 1.123112039 | 0.289249337 | 0.999071534 | Loxl1         | Loxl1         | LOXL1      | 35.09001677 | 42.74812202 | 51.16336746 | 38.22954071 | 43.68891115 | 51.00627523 | 30.86919499 | 44.42001689 | 21.44924284 | 18.16979213 |
| ENSMUSG00000028226 | 0.536680804  | 1.768477399  | 1.122832116 | 0.289309442 | 0.999071534 | Mmp16         | Mmp16         | MMMP16     | 2.315941107 | 3.320242487 | 1.817645949 | 4.093544286 | 2.223687094 | 5.820972922 | 4.724216424 | 1.105319238 | 4.242707375 | 3.006512367 |
| ENSMUSG00000038696 | -0.265953966 | 4.930921681  | 1.122592581 | 0.289360888 | 0.999071534 | Mapkap1       | Mapkap1       | MAPKAP1    | 42.17820016 | 32.55023438 | 34.60259326 | 28.51604579 | 34.85956533 | 50.42417793 | 30.7397644  | 20.93198308 | 16.81369219 | 19.67304832 |

|                    |              |              |             |             |             |               |               |          |             |             |             |             |             |             |             |             |             |             |
|--------------------|--------------|--------------|-------------|-------------|-------------|---------------|---------------|----------|-------------|-------------|-------------|-------------|-------------|-------------|-------------|-------------|-------------|-------------|
| ENSMUSG00000032212 | 0.360601751  | 6.660407264  | 1.122121526 | 0.289462093 | 0.999071534 | Sltm          | Sltm          | SLTM     | 70.25021358 | 54.6061309  | 139.2182157 | 103.5874851 | 89.14369146 | 102.9584586 | 42.25908664 | 104.3835856 | 139.3022255 | 143.593645  |
| ENSMUSG00000025574 | 0.362963234  | 5.860213447  | 1.121624061 | 0.28956902  | 0.999071534 | Tk1           | Tk1           | TK1      | 75.30317599 | 31.06798327 | 44.90258697 | 49.40005986 | 63.30967962 | 96.40986402 | 121.8588976 | 26.52766172 | 43.29132896 | 35.88207151 |
| ENSMUSG00000021666 | 0.290782235  | 4.170971645  | 1.120337841 | 0.28984572  | 0.999071534 | Gfm2          | Gfm2          | GFM2     | 17.68536845 | 19.92145492 | 11.915679   | 12.62754339 | 21.77905301 | 19.20921064 | 16.8906916  | 22.58996193 | 18.77790857 | 16.40510009 |
| ENSMUSG00000053338 | -0.802122836 | 0.085817823  | 1.120236586 | 0.289867517 | 0.999071534 | Tarm1         | Tarm1         | TARM1    | 2.17558104  | 1.956571465 | 0.269280881 | 1.318260024 | 0.39241537  | 0.436572969 | 0.776583522 | 0.414494714 | 0.864255206 | 0.653589645 |
| ENSMUSG00000035107 | 0.254031716  | 5.129167224  | 1.120090115 | 0.289899051 | 0.999071534 | Dcbld2        | Dcbld2        | DCBLD2   | 24.0717515  | 37.88633838 | 39.98821088 | 31.91576901 | 30.93541163 | 37.90908615 | 32.81065379 | 49.94661308 | 30.48463818 | 31.04550814 |
| ENSMUSG00000037326 | 0.41169036   | 3.00222365   | 1.119991725 | 0.289920236 | 0.999071534 | Capn15        | Capn15        | CAPN15   | 10.73754513 | 8.004155995 | 6.193460271 | 3.260959008 | 7.259684337 | 16.66253499 | 6.212668174 | 6.148338263 | 6.285492408 | 9.738485711 |
| ENSMUSG00000044791 | -0.263468313 | 5.55423529   | 1.119952066 | 0.289928776 | 0.999071534 | Setd2         | Setd2         | SETD2    | 42.59928036 | 69.54722209 | 53.38493473 | 47.17983245 | 52.91067233 | 66.21356699 | 32.7459385  | 55.68045663 | 21.60638015 | 35.81671255 |
| ENSMUSG00000054676 | -0.275848825 | 4.631437341  | 1.119920056 | 0.289935669 | 0.999071534 | 1600014C10Rik | 1600014C10Rik | C19orf12 | 39.51135888 | 25.85045936 | 25.64900395 | 23.93682676 | 25.70320671 | 34.56202672 | 25.69197151 | 19.27400422 | 10.68533709 | 21.30702243 |
| ENSMUSG00000002307 | -0.338781213 | 4.019828348  | 1.119891408 | 0.289941838 | 0.999071534 | Daxx          | Daxx          | DAXX     | 23.019051   | 25.25755892 | 14.94508892 | 12.28063286 | 18.37811981 | 28.52276732 | 13.52549634 | 10.08603805 | 6.599767028 | 13.59466462 |
| ENSMUSG00000020074 | 0.401891941  | 7.719144662  | 1.119858525 | 0.289948919 | 0.999071534 | Ccar1         | Ccar1         | CCAR1    | 121.2009179 | 111.1095432 | 261.0678145 | 251.2326078 | 189.2750133 | 181.2505444 | 99.40269078 | 183.3448287 | 319.7744262 | 328.0366428 |
| ENSMUSG00000087377 | 0.771108472  | 0.227284335  | 1.119156372 | 0.290100181 | 0.999071534 | AV099323      | AV099323      |          | 0.210540101 | 0.592900444 | 1.144443746 | 1.457024238 | 0.523220493 | 1.382481069 | 0.517722348 | 0.690824524 | 1.257098482 | 2.483640651 |
| ENSMUSG00000050762 | 1.058646237  | -0.243236388 | 1.118523966 | 0.290236504 | 0.999071534 | Prss27        | Prss27        | PRSS27   | 0.491260235 | 0.118580089 | 0.269280881 | 0.832585279 | 0.654025616 | 0.218286485 | 0.19414588  | 2.072473572 | 0           | 2.156845829 |
| ENSMUSG00000025347 | 0.50503441   | 1.955700749  | 1.117885419 | 0.290374234 | 0.999071534 | Mettl7b       | Mettl7b       | METTL7B  | 3.36864161  | 2.845922132 | 2.423527932 | 4.371072713 | 3.008517833 | 1.8918162   | 3.300479967 | 6.562832977 | 4.792687961 | 3.856178906 |
| ENSMUSG00000097743 | 0.432600636  | 3.410954246  | 1.117546972 | 0.290447268 | 0.999071534 | Gm16973       | Gm16973       |          | 8.983044293 | 7.470545595 | 6.058819831 | 10.68484441 | 13.21131744 | 4.80230266  | 7.636404631 | 17.33969555 | 13.59237733 | 12.28748533 |
| ENSMUSG00000005732 | 0.30163745   | 8.339519842  | 1.117536391 | 0.290449552 | 0.999071534 | Ranbp1        | Ranbp1        | RANBP1   | 349.426387  | 195.6571465 | 388.9762331 | 302.783513  | 266.3846334 | 394.6619641 | 415.1486077 | 239.6470274 | 360.4729896 | 304.5727746 |
| ENSMUSG00000028339 | 0.618622274  | 3.738486763  | 1.117370856 | 0.290485282 | 0.999071534 | Col15a1       | Col15a1       | COL15A1  | 12.00078574 | 10.67220799 | 13.73332495 | 7.285121188 | 10.59521498 | 57.91868057 | 18.8968657  | 2.279720929 | 4.949825271 | 3.267948225 |
| ENSMUSG00000015709 | -0.408895451 | 3.025755133  | 1.117302911 | 0.290499949 | 0.999071534 | Arnt2         | Arnt2         | ARNT2    | 9.053224327 | 9.664277238 | 10.70391503 | 8.603381212 | 9.41796887  | 12.58785394 | 2.394465859 | 7.806317121 | 4.714119306 | 6.797323209 |
| ENSMUSG00000040731 | -0.279765239 | 8.137602626  | 1.116937165 | 0.290578919 | 0.999071534 | Elf4h         | Elf4h         | EIF4H    | 372.7261581 | 300.6598152 | 372.5500994 | 277.3202799 | 281.1002097 | 401.5743694 | 276.0107267 | 194.3289386 | 167.9012159 | 223.7237355 |
| ENSMUSG00000042308 | 0.267242085  | 4.834900273  | 1.116835185 | 0.290600942 | 0.999071534 | Setd1a        | Setd1a        | SETD1A   | 29.61597415 | 22.88595714 | 32.58298665 | 19.77390037 | 29.49655528 | 44.09386988 | 18.24971276 | 35.50838053 | 21.99922343 | 32.48340536 |
| ENSMUSG00000072770 | 0.527401967  | 2.62752466   | 1.116504306 | 0.290672414 | 0.999071534 | Acrbp         | Acrbp         | ACRBP    | 4.210802013 | 3.735272798 | 8.145746661 | 5.411804311 | 4.120361381 | 3.856394561 | 1.747312924 | 8.289894287 | 6.364061063 | 13.33322876 |
| ENSMUSG00000028629 | 0.295591747  | 3.886466925  | 1.115641257 | 0.290858944 | 0.999071534 | Exo5          | Exo5          | EXO5     | 14.94834714 | 13.34025999 | 10.83855548 | 11.86434022 | 17.59328907 | 19.79130793 | 18.70271982 | 16.64887103 | 8.563983406 | 15.81686941 |
| ENSMUSG00000019726 | -0.634397978 | 2.475003357  | 1.1156249   | 0.29086248  | 0.999071534 | Lyst          | Lyst          | LYST     | 6.596923153 | 16.4233423  | 2.558168373 | 2.983403582 | 5.951633105 | 8.076599929 | 4.594785837 | 6.977327692 | 0.549980586 | 1.503256184 |
| ENSMUSG00000066798 | 0.255844236  | 4.376324324  | 1.115294726 | 0.290933882 | 0.999071534 | Zbtb6         | Zbtb6         | ZBTB6    | 23.2295911  | 18.14275359 | 21.54247051 | 16.65170557 | 18.24731469 | 20.88274036 | 25.23896446 | 22.03730231 | 19.32788915 | 20.13056107 |
| ENSMUSG00000024571 | -0.252171349 | 6.439413587  | 1.115024385 | 0.290992361 | 0.999071534 | Gm16286       | Gm16286       | NAA11    | 119.7271372 | 89.29080688 | 96.94111729 | 100.6040545 | 82.0802148  | 133.0092313 | 80.95883214 | 56.99302322 | 44.23415282 | 81.37191081 |
| ENSMUSG00000038683 | 0.235196722  | 6.599179245  | 1.114382051 | 0.291131368 | 0.999071534 | Pak1ip1       | Pak1ip1       | PAK1IP1  | 96.77826625 | 79.74510973 | 104.8175831 | 92.90264067 | 86.92000436 | 92.77175594 | 127.683274  | 104.0381733 | 84.61844154 | 92.87508856 |
| ENSMUSG00000030619 | 0.272806875  | 5.389813033  | 1.113406007 | 0.291342755 | 0.999071534 | Eed           | Eed           | EED      | 50.74016425 | 39.30929944 | 30.42873959 | 42.11493868 | 33.81312435 | 65.9952805  | 65.23301583 | 26.66582662 | 33.39167842 | 34.37881533 |
| ENSMUSG00000032265 | -0.312767211 | 4.428667908  | 1.113333615 | 0.291358441 | 0.999071534 | Fam46a        | Fam46a        | FAM46A   | 18.03626862 | 25.19826887 | 34.33331237 | 23.38176991 | 21.84445557 | 16.51701067 | 10.67802342 | 26.66582662 | 16.42084892 | 20.58807382 |
| ENSMUSG00000061848 | -0.862084252 | -0.033785787 | 1.11247065  | 0.291545514 | 0.999071534 | Gm5805        | Gm5805        |          | 0.421080201 | 1.837991377 | 0.201960661 | 2.22022741  | 0.850233301 | 0.291048646 | 1.29430587  | 0.414494714 | 0.31427462  | 0.522871716 |
| ENSMUSG00000037730 | 0.283507354  | 4.312356286  | 1.112466788 | 0.291546352 | 0.999071534 | Mynn          | Mynn          | MYNN     | 16.77302802 | 21.64086621 | 16.35881354 | 15.81912029 | 22.04066326 | 23.86598898 | 24.26823505 | 25.28417758 | 18.77790857 | 12.1567674  |
| ENSMUSG00000036985 | -0.333502293 | 4.61780892   | 1.110274151 | 0.292022362 | 0.999071534 | Zdhhc9        | Zdhhc9        | ZDHHC9   | 22.5979708  | 44.70469348 | 18.44574037 | 21.09216039 | 35.2519807  | 34.4165024  | 24.00937388 | 25.8368372  | 8.563983406 | 15.62079252 |
| ENSMUSG00000037992 | -0.304797224 | 5.433802743  | 1.110032351 | 0.292074916 | 0.999071534 | Rara          | Rara          | RARA     | 50.38926408 | 57.68921321 | 50.69212592 | 29.90368792 | 60.23575923 | 38.05461048 | 20.19117157 | 62.86503168 | 24.43485174 | 40.65327592 |
| ENSMUSG00000097000 | 0.667049847  | 0.702911011  | 1.109721186 | 0.292142564 | 0.999071534 | Gm17435       | Gm17435       |          | 2.315941107 | 1.245090933 | 0.336601102 | 0.832585279 | 1.308051232 | 1.600767553 | 2.718042326 | 0.898071881 | 0.864255206 | 2.875794438 |
| ENSMUSG00000067653 | 0.923648483  | 0.645484801  | 1.109618905 | 0.292164805 | 0.999071534 | Ankrd23       | Ankrd23       | ANKRD23  | 2.105401006 | 0.592900444 | 0.740522424 | 0           | 1.831271725 | 0.582097292 | 0.453007054 | 0.483577167 | 2.357059653 | 4.836563373 |
| ENSMUSG00000022722 | 0.331981244  | 3.829691174  | 1.109454516 | 0.292200555 | 0.999071534 | Arl6          | Arl6          | ARL6     | 11.36916543 | 9.782857327 | 12.05031944 | 16.72108768 | 14.51936867 | 10.55051342 | 20.8383245  | 14.3691501  | 10.68533709 | 18.75802281 |
| ENSMUSG00000027857 | 0.879275062  | 0.748993806  | 1.109363012 | 0.292220458 | 0.999071534 | Tshb          | Tshb          | TSHB     | 0.070180034 | 0.177870133 | 3.635291898 | 0.624438959 | 1.177246109 | 0.9459081   | 0.711868228 | 1.243484143 | 2.592765618 | 3.856178906 |
| ENSMUSG00000071001 | 0.902477436  | 0.520427922  | 1.109250972 | 0.292244829 | 0.999071534 | Hrct1         | Hrct1         |          | 1.052700503 | 0.711480533 | 0.086926831 | 0.555056852 | 0.39241537  | 1.382481069 | 0.711868228 | 0           | 4.00700141  | 1.633974113 |
| ENSMUSG00000024346 | 0.259081184  | 6.613607586  | 1.108899665 | 0.292321262 | 0.999071534 | Pfdn1         | Pfdn1         | PFDN1    | 94.67286525 | 71.14805329 | 108.1162739 | 96.92680285 | 90.38634013 | 74.07188043 | 117.9112647 | 104.0381733 | 105.5962725 | 100.5220874 |
| ENSMUSG00000025314 | -0.250076654 | 4.902372554  | 1.108811597 | 0.292340427 | 0.999071534 | Ptprij        | Ptprij        | PTPRJ    | 36.14271727 | 35.81118682 | 32.65030687 | 29.6955416  | 33.94392947 | 45.91292392 | 23.62108212 | 18.03052007 | 18.38506529 | 29.60761092 |
| ENSMUSG00000024983 | -0.309657415 | 3.956891299  | 1.108330625 | 0.292445122 | 0.999071534 | Vt11a         | Vt11a         | VTI1A    | 22.66815083 | 19.56571465 | 13.59868451 | 15.81912029 | 17.07006858 | 23.72046466 | 15.53167044 | 12.22759407 | 7.306884924 | 10.19599846 |

|                    |              |              |             |             |             |               |               |              |             |             |             |             |             |             |             |             |             |             |
|--------------------|--------------|--------------|-------------|-------------|-------------|---------------|---------------|--------------|-------------|-------------|-------------|-------------|-------------|-------------|-------------|-------------|-------------|-------------|
| ENSMUSG00000004631 | 0.60604964   | 1.025745641  | 1.107945121 | 0.29252907  | 0.999071534 | Sgce          | Sgce          | SGCE         | 1.824680872 | 2.075151554 | 1.481044848 | 1.110113705 | 1.373453794 | 2.40115133  | 4.335924663 | 1.796143762 | 2.042785033 | 0.522871716 |
| ENSMUSG00000016637 | -0.274891653 | 4.296869882  | 1.107823654 | 0.292555528 | 0.999071534 | Ift27         | Ift27         | IFT27        | 21.89617047 | 19.32855448 | 21.81175139 | 26.78149313 | 20.66720946 | 15.06176744 | 17.08483748 | 14.43823255 | 15.3994564  | 22.41812483 |
| ENSMUSG00000008822 | 0.348709808  | 4.126191054  | 1.107573148 | 0.292610101 | 0.999071534 | Acyp1         | Acyp1         | ACYP1        | 15.79050755 | 12.45090933 | 14.13724627 | 19.28822562 | 17.2008737  | 7.785551283 | 19.99702569 | 21.34647779 | 19.56359512 | 21.63381725 |
| ENSMUSG00000074634 | 0.860613964  | 1.331946829  | 1.107474258 | 0.292631649 | 0.999071534 | Gm7120        | Gm7120        | TMEM267      | 5.54422265  | 2.075151554 | 0.673202203 | 0           | 0.654025616 | 5.093351307 | 6.665675228 | 0.967154334 | 1.414235792 | 1.372538255 |
| ENSMUSG00000059835 | 1.576790803  | -1.210350799 | 1.106321469 | 0.29288298  | 0.999071534 | Rpl13-ps3     | Rpl13-ps3     | RPL13        | 0           | 0.237160178 | 0.134640441 | 0           | 0.39241537  | 0           | 0           | 1.036236786 | 0           | 1.111102397 |
| ENSMUSG00000082117 | 0.878325015  | 0.073874925  | 1.10629308  | 0.292889172 | 0.999071534 | Gm4994        | Gm4994        |              | 0.842160403 | 0.415030311 | 0.942483085 | 0.901967385 | 0.327012808 | 0.218286485 | 0.258861174 | 0.828989429 | 2.907040239 | 1.111102397 |
| ENSMUSG00000040532 | 0.249199568  | 5.101359629  | 1.106006603 | 0.292951675 | 0.999071534 | Abhd11        | Abhd11        | ABHD11       | 36.63397751 | 21.58157616 | 34.33331237 | 31.70762269 | 38.06429085 | 30.70563216 | 40.77063489 | 36.19920505 | 31.42746204 | 38.23499424 |
| ENSMUSG00000035674 | 0.273668268  | 6.146034435  | 1.105784385 | 0.293000169 | 0.999071534 | Ndufa3        | Ndufa3        | NDUFA3       | 70.46075368 | 48.91428664 | 72.23459643 | 81.87088573 | 57.03103371 | 52.02494549 | 70.79853107 | 69.2206173  | 83.36134306 | 87.31957658 |
| ENSMUSG00000071303 | -0.416271819 | 7.388589034  | 1.105784089 | 0.293000233 | 0.999071534 | Rps8-ps1      | Rps8-ps1      |              | 282.544815  | 241.0733206 | 86.97772468 | 181.7117371 | 205.4948485 | 195.5846902 | 291.3482512 | 77.85592385 | 42.50564241 | 115.2278544 |
| ENSMUSG00000032381 | 0.305296411  | 6.651709843  | 1.105751398 | 0.293007369 | 0.999071534 | Fam96a        | Fam96a        | FAM96A       | 120.7798377 | 77.07705773 | 82.46726992 | 100.8122008 | 84.69631727 | 102.0853126 | 206.4417862 | 72.81290482 | 78.49008644 | 77.84252673 |
| ENSMUSG00000087523 | -0.940604932 | -0.566869173 | 1.104790308 | 0.29321723  | 0.999071534 | Gm12319       | Gm12319       |              | 1.333420637 | 0.652190488 | 0.336601102 | 0.20814632  | 1.177246109 | 0.509335131 | 0.711868228 | 0.207247357 | 0           | 0.392153787 |
| ENSMUSG00000054717 | 0.332267707  | 7.704871866  | 1.104772384 | 0.293221146 | 0.999071534 | Hmgb2         | Hmgb2         | HMGB2        | 183.2400676 | 103.7575777 | 252.5854667 | 230.7648864 | 182.7347571 | 247.3913492 | 282.7411172 | 130.2895052 | 265.0906423 | 180.52146   |
| ENSMUSG00000053835 | -0.670730907 | 1.032739191  | 1.103810695 | 0.293431335 | 0.999071534 | H2-T24        | H2-T24        |              | 4.842422314 | 3.49811262  | 1.548365068 | 1.248877918 | 1.111843547 | 3.419821592 | 1.747312924 | 1.519813953 | 0.31427462  | 0.588230681 |
| ENSMUSG00000086567 | -0.531715756 | 2.225783731  | 1.103715586 | 0.293452132 | 0.999071534 | Gm2830        | Gm2830        |              | 9.544484562 | 3.201662398 | 4.577774983 | 7.909560147 | 2.485297341 | 2.546675653 | 4.077063489 | 1.588896405 | 5.028393926 | 4.052255799 |
| ENSMUSG00000038005 | 0.24493205   | 5.994662648  | 1.103361253 | 0.293529631 | 0.999071534 | 2700029M09Rik | 2700029M09Rik | HPF1         | 59.16176828 | 54.84329108 | 71.02283246 | 59.46046531 | 57.5542542  | 82.00295604 | 101.0852884 | 47.25239744 | 51.85531236 | 54.5093764  |
| ENSMUSG00000022651 | -0.593188751 | 1.746995559  | 1.103182255 | 0.293568792 | 0.999071534 | Retnlg        | Retnlg        | RETNLB       | 6.73728322  | 6.759065062 | 1.750325729 | 3.885397967 | 0.981038424 | 2.110102684 | 4.27120937  | 2.141556024 | 2.121353688 | 1.633974113 |
| ENSMUSG00000079036 | 0.299315016  | 4.568554903  | 1.103070798 | 0.293593179 | 0.999071534 | Alkbh1        | Alkbh1        | ALKBH1       | 23.58049127 | 16.77908257 | 20.26338632 | 30.66689109 | 17.72409419 | 28.7410538  | 24.07408917 | 16.44162367 | 30.95605011 | 23.52922722 |
| ENSMUSG00000048410 | -0.36523807  | 3.369888085  | 1.102267366 | 0.29376905  | 0.999071534 | Zfp407        | Zfp407        | ZNF407       | 10.6673651  | 15.8897319  | 10.23267349 | 8.672763319 | 14.45396611 | 13.38823772 | 5.177223478 | 8.704389002 | 4.635550651 | 12.41820326 |
| ENSMUSG00000042202 | 0.326662279  | 4.358143553  | 1.102207345 | 0.293782194 | 0.999071534 | Slc35e2       | Slc35e2       | SLC35E2B     | 12.7727661  | 13.87387039 | 27.33200946 | 17.69243717 | 22.04066326 | 18.77263767 | 12.49005164 | 26.59674417 | 22.54920401 | 26.79717545 |
| ENSMUSG00000086370 | 0.409943522  | 3.506817463  | 1.101584307 | 0.293918678 | 0.999071534 | Ftx           | Ftx           |              | 5.965302851 | 8.597056439 | 11.71371834 | 11.58681179 | 12.03407133 | 8.367648575 | 7.118682283 | 8.842553906 | 16.89226085 | 18.2351511  |
| ENSMUSG00000032349 | -0.260216113 | 6.785098346  | 1.101417047 | 0.293955332 | 0.999071534 | ElovI5        | ElovI5        | ELOVL5       | 83.93532012 | 118.5800888 | 107.3084312 | 157.0810892 | 153.5652146 | 98.44720454 | 113.4459095 | 109.9792642 | 67.72618069 | 95.750883   |
| ENSMUSG00000001016 | 0.281136464  | 6.704975525  | 1.101238373 | 0.293994494 | 0.999071534 | Ilf2          | Ilf2          | ILF2         | 130.0436022 | 86.9192051  | 96.53719597 | 78.05486987 | 98.69246545 | 144.6511771 | 186.0564688 | 73.02015218 | 67.17620011 | 93.52867821 |
| ENSMUSG00000021468 | 0.327199319  | 5.06980728   | 1.099876042 | 0.29429331  | 0.999071534 | Sptlc1        | Sptlc1        | SPTLC1       | 39.93243909 | 36.81911758 | 20.26338632 | 24.07559097 | 33.81312435 | 48.82341038 | 69.11593344 | 22.24454967 | 22.15636074 | 21.82989414 |
| ENSMUSG00000035024 | 0.336869458  | 3.730421518  | 1.099370302 | 0.294404338 | 0.999071534 | Ncapd3        | Ncapd3        | NCAPD3       | 15.57996745 | 9.367827016 | 12.92548231 | 10.33793388 | 12.23027902 | 26.77647544 | 14.30207986 | 8.704389002 | 13.59237733 | 9.28097296  |
| ENSMUSG00000097254 | 0.5774777113 | 0.935748529  | 1.09931561  | 0.294416348 | 0.999071534 | C430042M11Rik | C430042M11Rik |              | 1.543960738 | 1.245090933 | 2.288887492 | 0.763203172 | 1.63506404  | 1.45524323  | 2.070889391 | 1.312566595 | 2.749902928 | 2.418281687 |
| ENSMUSG00000026374 | 0.247335341  | 7.0005724    | 1.098492746 | 0.294597122 | 0.999071534 | Tsn           | Tsn           | TSN          | 117.270836  | 93.38181994 | 131.5437105 | 133.7687014 | 129.8240848 | 140.9403069 | 142.8266527 | 111.3609133 | 129.8739869 | 140.3910558 |
| ENSMUSG00000040725 | -0.249760274 | 6.498243235  | 1.098310657 | 0.294637144 | 0.999071534 | Hnrrnpul1     | Hnrrnpul1     | HNRNPUL1     | 102.2523089 | 111.8803138 | 104.7502629 | 81.10768256 | 110.6611342 | 138.1753447 | 55.13743004 | 92.98498092 | 56.64800033 | 66.40470794 |
| ENSMUSG00000041119 | -0.585222002 | 1.873900576  | 1.098144782 | 0.294673608 | 0.999071534 | Pde9a         | Pde9a         | PDE9A        | 4.210802013 | 2.490181865 | 5.452937848 | 7.215739081 | 2.354492217 | 2.546675653 | 0.517722348 | 2.625133191 | 2.985608894 | 4.705845444 |
| ENSMUSG00000097411 | 1.006866812  | 0.100223729  | 1.096962714 | 0.294933629 | 0.999071534 | B430218F22Rik | B430218F22Rik |              | 0.631620302 | 0           | 1.750325729 | 0.138764213 | 0.784830739 | 0.509335131 | 0.129430587 | 1.036236786 | 1.807079067 | 2.352922722 |
| ENSMUSG00000031467 | 0.237093813  | 5.564126062  | 1.096852901 | 0.2949578   | 0.999071534 | Agpat5        | Agpat5        | AGPAT5       | 43.7221609  | 48.7364165  | 42.6810197  | 50.92646621 | 38.06429085 | 55.00819411 | 68.59821109 | 33.50498941 | 40.30572007 | 50.06496681 |
| ENSMUSG00000098112 | -0.38895485  | 3.002791616  | 1.096830604 | 0.294962708 | 0.999071534 | Bin2          | Bin2          | BIN2         | 11.22880537 | 10.5536279  | 8.347707322 | 5.966861163 | 10.59521498 | 13.09718907 | 4.788931717 | 7.668152216 | 4.085570065 | 4.64048648  |
| ENSMUSG00000082762 | 0.978287421  | 0.345333467  | 1.095505091 | 0.29525467  | 0.999071534 | Gm12366       | Gm12366       |              | 0.98252047  | 0.889350666 | 0           | 0.346910533 | 1.765869163 | 2.182864846 | 1.29430587  | 0.759906976 | 0           | 3.398666154 |
| ENSMUSG00000032002 | 0.291863293  | 10.80867407  | 1.095498595 | 0.295256101 | 0.999071534 | Dcun1d5       | Dcun1d5       | DCUN1D5      | 1711.831378 | 1854.711169 | 1628.610771 | 1670.027305 | 1500.857984 | 1319.90561  | 2400.743242 | 2282.829639 | 1529.181734 | 1858.416797 |
| ENSMUSG00000039316 | -0.323089061 | 3.802963689  | 1.095462243 | 0.295264113 | 0.999071534 | Rftn1         | Rftn1         | RFTN1        | 19.93112953 | 17.43127306 | 12.52156098 | 13.8070392  | 16.3506404  | 17.82672957 | 12.74891282 | 14.02373784 | 4.635550651 | 12.09140843 |
| ENSMUSG00000001403 | 0.31706123   | 6.659788341  | 1.094862659 | 0.295396307 | 0.999071534 | Ube2c         | Ube2c         | UBE2C        | 79.7245181  | 38.12349855 | 132.7554745 | 102.0610787 | 112.6232111 | 113.6544963 | 84.97118034 | 93.60672299 | 126.4955347 | 112.2213421 |
| ENSMUSG00000045409 | 0.29529834   | 4.446645956  | 1.094698091 | 0.295432603 | 0.999071534 | Trim39        | Trim39        | TRIM39-RPP21 | 21.3347302  | 17.4905631  | 23.831358   | 17.55367296 | 20.92881971 | 21.39207549 | 12.49005164 | 28.46197039 | 24.74912636 | 25.88214994 |
| ENSMUSG00000028617 | -0.233831285 | 4.858307641  | 1.094583893 | 0.295457794 | 0.999071534 | Lrrc42        | Lrrc42        | LRRC42       | 36.42343741 | 31.72017376 | 33.32350907 | 29.41801318 | 31.327827   | 36.09003212 | 31.64577851 | 23.62619872 | 18.38506529 | 20.65343278 |
| ENSMUSG00000070880 | -0.9610136   | -0.124156136 | 1.094519521 | 0.295471994 | 0.999071534 | Gad1          | Gad1          | GAD1         | 0.771980369 | 0.118580089 | 1.279084186 | 2.567137942 | 0.523220493 | 0.800383777 | 0.064715293 | 0.138164905 | 0.31427462  | 1.30717929  |
| ENSMUSG00000017132 | -0.242444748 | 5.029121765  | 1.094208489 | 0.295540621 | 0.999071534 | Cyth1         | Cyth1         | CYTH1        | 44.3537812  | 39.96148993 | 31.90978444 | 26.98963945 | 40.74579587 | 38.78223209 | 25.69197151 | 31.7779281  | 16.42084892 | 34.18273844 |

|                     |              |              |             |             |             |               |               |           |             |             |             |             |             |             |             |             |             |             |
|---------------------|--------------|--------------|-------------|-------------|-------------|---------------|---------------|-----------|-------------|-------------|-------------|-------------|-------------|-------------|-------------|-------------|-------------|-------------|
| ENSMUSG00000022322  | 0.309462583  | 5.224150059  | 1.093696459 | 0.295653642 | 0.999071534 | Shcbp1        | Shcbp1        | SHCBP1    | 40.28333925 | 21.7594463  | 41.19997485 | 36.98066279 | 32.11265774 | 56.09962653 | 58.76148648 | 16.30345876 | 34.72734555 | 36.01278944 |
| ENSMUSG00000062353  | 0.667671054  | 3.190546883  | 1.093620437 | 0.295670427 | 0.999071534 | Gm15772       | Gm15772       |           | 20.14166963 | 1.185800888 | 6.058819831 | 5.82809695  | 3.204725518 | 3.565345915 | 8.412988152 | 3.937699786 | 22.54920401 | 10.32671639 |
| ENSMUSG00000030982  | -0.22191949  | 5.708515786  | 1.092965151 | 0.29581516  | 0.999071534 | 9030624J02Rik | 9030624J02Rik | C16orf62  | 56.9160072  | 74.11255551 | 44.29670498 | 56.33827052 | 60.17035667 | 70.36101019 | 43.22981604 | 44.07460463 | 33.47024707 | 46.27414687 |
| ENSMUSG00000037636  | 0.441759124  | 2.288462433  | 1.092694758 | 0.295874908 | 0.999071534 | Slc25a43      | Slc25a43      | SLC25A43  | 4.421342113 | 2.430891821 | 6.664701814 | 4.579219032 | 2.746907587 | 5.020589145 | 6.147952881 | 4.006782239 | 5.028393926 | 6.013024734 |
| ENSMUSG00000058709  | -0.299346787 | 5.278921536  | 1.092598525 | 0.295896176 | 0.999071534 | Egln2         | Egln2         | EGLN2     | 68.0044525  | 47.84706584 | 31.775144   | 36.77251647 | 38.19509597 | 61.55678865 | 44.84769838 | 19.89574629 | 18.30649664 | 30.39191849 |
| ENSMUSG00000018379  | 0.295542404  | 8.161442314  | 1.092335528 | 0.29595431  | 0.999071534 | Srsf1         | Srsf1         | SRSF1     | 267.3859278 | 172.4747392 | 339.8997925 | 257.0607048 | 296.4698117 | 449.3791096 | 293.8721477 | 195.5033403 | 285.9113359 | 314.899491  |
| ENSMUSG00000056201  | -0.29085947  | 10.69761906  | 1.091508382 | 0.296137242 | 0.999071534 | Cfl1          | Cfl1          | CFL1      | 1619.895534 | 1251.434967 | 2614.717358 | 1983.634426 | 1989.545924 | 1973.30982  | 1144.942972 | 1429.661352 | 1118.424805 | 1636.523112 |
| ENSMUSG00000027833  | -0.412507034 | 3.688639755  | 1.091341204 | 0.296174233 | 0.999071534 | Shox2         | Shox2         | SHOX2     | 6.59623153  | 12.33232924 | 15.887572   | 27.05902155 | 12.55729183 | 10.62327558 | 6.147952881 | 12.08942917 | 13.8280833  | 8.692742279 |
| ENSMUSG00000027488  | -0.303998081 | 3.81263333   | 1.091267423 | 0.296190559 | 0.999071534 | Snta1         | Snta1         | SNTA1     | 15.93086761 | 20.45506532 | 16.02221244 | 11.51742969 | 16.21983528 | 13.46099988 | 11.64875283 | 16.51070612 | 7.228316269 | 11.82997258 |
| ENSMUSG00000037946  | -0.403525086 | 3.605089088  | 1.09059818  | 0.29633871  | 0.999071534 | Fgd3          | Fgd3          | FGD3      | 15.93086761 | 23.30098745 | 8.616988204 | 6.938210655 | 17.07006858 | 22.84731872 | 7.895265804 | 8.704389002 | 4.949825271 | 8.627383315 |
| ENSMUSG00000030281  | -0.239297647 | 6.532841429  | 1.089251789 | 0.296637048 | 0.999071534 | Il17rc        | Il17rc        | IL17RC    | 118.3235366 | 118.0464784 | 91.42085922 | 94.15151859 | 98.56166033 | 80.03837767 | 59.60278529 | 94.15938261 | 72.20459403 | 99.93385673 |
| ENSMUSG00000029763  | -0.254942985 | 4.332922118  | 1.089113575 | 0.296667695 | 0.999071534 | Exoc4         | Exoc4         | EXOC4     | 18.80824899 | 25.4947191  | 19.32090324 | 22.89609516 | 26.55344001 | 26.48542679 | 16.50239984 | 16.85611838 | 13.27810271 | 16.66653595 |
| ENSMUSG00000091931  | 0.316429593  | 3.99084841   | 1.088746695 | 0.296749068 | 0.999071534 | AKO10878      | AKO10878      | C14orf142 | 13.75528657 | 11.38368853 | 15.14704958 | 16.16603083 | 16.28523784 | 10.84156207 | 16.30825396 | 15.40538688 | 17.83508471 | 21.76453518 |
| ENSMUSG00000024253  | -0.302821666 | 4.047356737  | 1.088480001 | 0.296808237 | 0.999071534 | Dync2l1       | Dync2l1       | DYNC2L1   | 17.89590855 | 20.33648523 | 14.13724627 | 18.52502245 | 23.28331193 | 16.00767553 | 21.09718567 | 15.33630443 | 6.992610304 | 12.67963911 |
| ENSMUSG00000039910  | 0.333568062  | 6.512932729  | 1.08798972  | 0.296917051 | 0.999071534 | Cited2        | Cited2        | CITED2    | 62.53040989 | 107.5521406 | 95.25811178 | 56.1301242  | 99.34649106 | 59.51944813 | 54.81385358 | 162.8964227 | 87.36834447 | 113.2017265 |
| ENSMUSG00000002981  | -0.251912414 | 6.466976312  | 1.087761443 | 0.296967733 | 0.999071534 | Ciptm1        | Ciptm1        | CLPTM1    | 97.55024662 | 126.5249548 | 83.20779234 | 88.87847849 | 103.3360473 | 115.0369774 | 106.3272272 | 71.98391539 | 39.83430813 | 68.30011791 |
| ENSMUSG00000036339  | 0.27723077   | 3.866712367  | 1.087007779 | 0.297135141 | 0.999071534 | Tmem260       | Tmem260       | TMEM260   | 14.45708691 | 16.60121243 | 11.10783636 | 11.30928337 | 14.58477124 | 19.57302145 | 14.94923279 | 15.33630443 | 12.02100423 | 15.29399769 |
| ENSMUSG00000021040  | 0.278479773  | 5.677896146  | 1.086861917 | 0.297167554 | 0.999071534 | Slrp          | Slrp          | SLIRP     | 54.6000661  | 27.92561092 | 58.77055236 | 54.95062839 | 42.38085991 | 37.69079967 | 55.78458298 | 50.77560251 | 57.7479615  | 61.11063181 |
| ENSMUSG00000029030  | -0.221464467 | 6.086071351  | 1.086778449 | 0.297186104 | 0.999071534 | Tprgl         | Tprgl         | TPRGL     | 88.63738236 | 61.95809641 | 74.1195626  | 81.38521098 | 72.33523313 | 80.54771281 | 72.67527458 | 52.64082872 | 42.89848568 | 58.30019634 |
| ENSMUSG00000020309  | 0.324428744  | 4.003016148  | 1.084966784 | 0.297589104 | 0.999071534 | Chac2         | Chac2         | CHAC2     | 12.42186594 | 11.32439848 | 17.63789773 | 13.39074656 | 18.57432749 | 9.822891806 | 18.50857394 | 20.93198308 | 15.79229967 | 18.16979213 |
| ENSMUSG00000085822  | 1.010699337  | 0.460604229  | 1.084957167 | 0.297591245 | 0.999071534 | Gm15584       | Gm15584       |           | 0.631620302 | 0           | 2.625488593 | 0.901967385 | 0.196207685 | 0.363810808 | 0.258861174 | 1.519813953 | 4.16413872  | 1.045743432 |
| ENSMUSG00000087403  | 0.741439256  | 0.375451518  | 1.084286285 | 0.29774066  | 0.999071534 | 2900056M20Rik | Kantr         |           | 0.421080201 | 0.652190488 | 2.154247051 | 0.971349492 | 0.327012808 | 0.654859454 | 1.100159989 | 1.036236786 | 2.199922343 | 1.764692042 |
| ENSMUSG00000087331  | -0.730014468 | 0.782820757  | 1.084281621 | 0.297741699 | 0.999071534 | 1810021822Rik | 1810021822Rik |           | 0.842160403 | 0.889350666 | 2.962089695 | 3.399723221 | 2.027479409 | 0.873145938 | 0.841298815 | 1.934308667 | 0.078568655 | 2.091486864 |
| ENSMUSG00000021302  | 0.326124298  | 3.990599402  | 1.083322833 | 0.297955403 | 0.999071534 | Ggps1         | Ggps1         | GGPS1     | 14.87816711 | 16.06760203 | 16.15685288 | 9.019673851 | 16.93926345 | 17.89949173 | 24.7859574  | 22.03730231 | 7.778296855 | 13.46394669 |
| ENSMUSG00000087308  | 1.126820682  | 0.44938729   | 1.083278445 | 0.297965302 | 0.999071534 | Gm16195       | Gm16195       |           | 0.210540101 | 0.059290044 | 1.346404407 | 2.150845303 | 0.261610246 | 0.291048646 | 0           | 0.345412262 | 4.871256616 | 1.895409971 |
| ENSMUSG00000018042  | -0.255964156 | 8.428109294  | 1.082858471 | 0.298058976 | 0.999071534 | Cyb5r3        | Cyb5r3        | CYB5R3    | 369.3575165 | 371.6299983 | 427.8873205 | 404.2201528 | 368.7396423 | 337.9074781 | 296.5254747 | 281.0964988 | 275.3045675 | 319.9974902 |
| ENSMUSG00000030428  | 0.588317127  | 1.793069312  | 1.082718405 | 0.298090225 | 0.999071534 | Ttyh1         | Ttyh1         | TTYH1     | 2.666841275 | 2.430891821 | 3.567971678 | 1.873316877 | 3.400933203 | 1.382481069 | 1.229590576 | 3.592287524 | 7.149747614 | 4.64048648  |
| ENSMUSG00000032446  | -0.633639225 | 0.961764562  | 1.082479497 | 0.298143537 | 0.999071534 | Eomes         | Eomes         | EOMES     | 2.737021308 | 3.320242487 | 1.95228639  | 1.80393477  | 1.63506404  | 3.274297269 | 0.970729402 | 1.519813953 | 1.178529826 | 0.196076894 |
| ENSMUSG00000053838  | 0.215811164  | 6.15146922   | 1.082263422 | 0.298191764 | 0.999071534 | Nudcd3        | Nudcd3        | NUDCD3    | 69.19751307 | 75.00190617 | 73.71564127 | 62.30513168 | 60.69357716 | 99.4658748  | 73.12828163 | 56.71669342 | 64.7405718  | 77.25429604 |
| ENSMUSG00000021278  | 0.768700832  | -0.206147378 | 1.082013859 | 0.298247478 | 0.999071534 | Amn           | Amn           | AMN       | 0.210540101 | 0.177870133 | 0.875162864 | 0.693821065 | 0.850233301 | 0.873145938 | 0.711868228 | 1.036236786 | 0.628549241 | 1.241820326 |
| ENSMUSG00000037416  | 0.227369381  | 4.956304068  | 1.081666253 | 0.298325103 | 0.999071534 | Dmxi1         | Dmxi1         | DMXL1     | 28.77381375 | 34.92183616 | 25.78364439 | 25.67137942 | 33.02829361 | 37.69079967 | 34.88154319 | 34.88663846 | 27.73473525 | 25.94750891 |
| ENSMUSG00000031838  | -0.271850115 | 6.704862828  | 1.081476632 | 0.298367458 | 0.999071534 | Ifi30         | Ifi30         | IFI30     | 156.852375  | 72.98604467 | 119.8299922 | 129.4670108 | 111.6421726 | 142.1772636 | 120.8881682 | 71.15492597 | 57.66939284 | 77.18893708 |
| ENSMUSG000000334792 | -0.567747272 | 1.858396629  | 1.081424626 | 0.298379076 | 0.999071534 | Gna15         | Gna15         | GNA15     | 8.070703857 | 2.490181865 | 2.221567271 | 5.064893778 | 3.793348573 | 6.330308052 | 3.17104938  | 1.174401691 | 0.785686551 | 3.071871332 |
| ENSMUSG000000047205 | 0.252213166  | 5.126688082  | 1.0812896   | 0.298409243 | 0.999071534 | Dusp18        | Dusp18        | DUSP18    | 28.28255352 | 26.85839012 | 45.71042961 | 29.48739528 | 34.53255252 | 50.06036713 | 26.27440915 | 29.77453698 | 32.92026649 | 45.03232654 |
| ENSMUSG00000004865  | 0.252710546  | 6.40182276   | 1.080810457 | 0.298516322 | 0.999071534 | Srpki         | Srpki         | SRPK1     | 86.18108119 | 55.25832139 | 101.5862125 | 77.70795933 | 78.87548928 | 118.6023233 | 66.98032875 | 65.14475261 | 90.90393395 | 101.8292667 |
| ENSMUSG00000029765  | -0.685818158 | 0.820507969  | 1.080732929 | 0.298533653 | 0.999071534 | Plkna4        | Plkna4        | PLXNA4    | 2.877381375 | 1.719411288 | 2.356207712 | 2.081463196 | 1.373453794 | 1.382481069 | 3.429910554 | 0.690824524 | 0.235705965 | 0.457512752 |
| ENSMUSG00000051950  | 0.299897978  | 3.974881343  | 1.080476216 | 0.298591048 | 0.999071534 | B3gatl        | B3gatl        | B3GLCT    | 18.38716879 | 15.94902195 | 8.280387102 | 13.32136446 | 16.87386089 | 16.95358363 | 19.67344922 | 14.78364481 | 12.64955347 | 19.1501766  |
| ENSMUSG00000027506  | -0.231286706 | 6.982165532  | 1.080287697 | 0.298633205 | 0.999071534 | Tpd52         | Tpd52         | TPD52     | 146.8868102 | 165.8935443 | 130.1973061 | 132.4504414 | 133.1596154 | 137.2294366 | 125.4829541 | 122.8976828 | 79.66861627 | 101.4371129 |
| ENSMUSG00000048572  | -0.488529579 | 2.449530127  | 1.080125668 | 0.298669445 | 0.999071534 | Tmem252       | Tmem252       | TMEM252   | 7.228543455 | 6.699775018 | 5.250977187 | 8.533999106 | 4.381971627 | 5.966497245 | 7.24811287  | 4.490359406 | 0.707117896 | 3.856178906 |

|                    |              |              |             |             |             |               |               |          |             |             |             |             |             |             |             |             |             |             |
|--------------------|--------------|--------------|-------------|-------------|-------------|---------------|---------------|----------|-------------|-------------|-------------|-------------|-------------|-------------|-------------|-------------|-------------|-------------|
| ENSMUSG00000042759 | -0.241632946 | 6.195917611  | 1.079716681 | 0.298760945 | 0.999071534 | Apobr         | Apobr         | APOBR    | 97.97132682 | 111.1095432 | 55.9431031  | 63.62339171 | 85.02333007 | 96.40986402 | 64.13285584 | 52.77899363 | 51.6196064  | 64.50929797 |
| ENSMUSG00000041625 | 0.318967847  | 3.530114888  | 1.079643589 | 0.298777301 | 0.999071534 | Ggact         | Ggact         | GGACT    | 9.333944461 | 9.664277238 | 9.963392611 | 10.82360862 | 12.9497072  | 9.677367482 | 12.9430587  | 14.23098519 | 10.52819978 | 13.00643394 |
| ENSMUSG00000026475 | -0.273961125 | 6.104129166  | 1.079153732 | 0.298886949 | 0.999071534 | Rgs16         | Rgs16         | RGS16    | 89.3391827  | 75.95054689 | 83.74635411 | 52.9385473  | 90.38634013 | 115.1825017 | 76.4287616  | 39.65332767 | 38.81291562 | 42.81012175 |
| ENSMUSG00000078502 | 0.588989527  | 1.384472907  | 1.07889198  | 0.298945556 | 0.999071534 | Gm13212       | Gm13212       |          | 0.701800335 | 1.067220799 | 3.769932339 | 3.052812688 | 1.569661478 | 2.40115133  | 3.688771728 | 4.075864691 | 2.435628308 | 1.633974113 |
| ENSMUSG00000004768 | 0.242880447  | 4.798238541  | 1.078761009 | 0.298974892 | 0.999071534 | Rab23         | Rab23         | RAB23    | 23.08923104 | 23.8938879  | 29.21697563 | 28.30789947 | 26.88045282 | 47.22264283 | 27.7628609  | 22.24454967 | 23.0991846  | 27.90827784 |
| ENSMUSG00000070372 | 0.273828708  | 6.833350496  | 1.077009179 | 0.299367588 | 0.999071534 | Capza1        | Capza1        | CAPZA1   | 131.2366627 | 125.2205738 | 112.2228073 | 62.99895275 | 107.3256036 | 120.712426  | 180.5556688 | 92.22507395 | 110.7818037 | 94.31298578 |
| ENSMUSG00000024525 | -0.2678726   | 4.560886669  | 1.076649955 | 0.299448195 | 0.999071534 | Impa2         | Impa2         | IMPA2    | 29.12471392 | 37.70846824 | 16.08953266 | 23.79806255 | 26.74964769 | 26.19437815 | 19.93231039 | 21.83005496 | 15.16375043 | 20.78415071 |
| ENSMUSG00000097336 | 0.433341221  | 4.989511318  | 1.076540369 | 0.29947279  | 0.999071534 | Fendrr        | Fendrr        |          | 19.65040939 | 16.00831199 | 35.27579546 | 39.2008902  | 28.38471173 | 14.69795663 | 11.77818341 | 37.85718391 | 36.9272679  | 67.5811693  |
| ENSMUSG00000037447 | -0.275604733 | 4.034879856  | 1.076077656 | 0.299576671 | 0.999071534 | Arid5a        | Arid5a        | ARID5A   | 23.8612114  | 20.04003501 | 16.29149332 | 15.81912029 | 16.67765321 | 22.84731872 | 12.9430587  | 12.64208879 | 10.52819978 | 13.72538255 |
| ENSMUSG00000037824 | -0.219775403 | 6.257683358  | 1.075067058 | 0.299803716 | 0.999071534 | Tspan14       | Tspan14       | TSPAN14  | 88.2864822  | 94.62691087 | 75.93720855 | 74.10008979 | 94.83371431 | 88.1149776  | 78.4349357  | 76.88876951 | 43.36989761 | 59.4766577  |
| ENSMUSG00000018932 | 0.240341517  | 6.708961595  | 1.074999581 | 0.299818883 | 0.999071534 | Map2k3        | Map2k3        | MAP2K3   | 97.55024662 | 73.04533471 | 125.4848907 | 102.0610787 | 98.16924496 | 128.8617881 | 96.10221082 | 93.19222828 | 103.3963501 | 123.7245198 |
| ENSMUSG00000036934 | 0.270274152  | 4.79701898   | 1.07492543  | 0.299835552 | 0.999071534 | 4921524J17Rik | 4921524J17Rik | C16orf87 | 25.96661241 | 23.3602775  | 22.35031315 | 31.43009427 | 26.61884257 | 21.46483765 | 30.48090323 | 30.25811415 | 33.47024707 | 26.1435858  |
| ENSMUSG00000044894 | 0.295186968  | 7.283414383  | 1.073630159 | 0.300126916 | 0.999071534 | Uqcrq         | Uqcrq         | UQCRCQ   | 154.6767939 | 90.35802768 | 177.523421  | 171.3738032 | 128.3198259 | 120.4213773 | 204.9533344 | 146.1784693 | 168.6083338 | 169.5411539 |
| ENSMUSG00000037725 | 0.30701409   | 5.04178894   | 1.072891574 | 0.30029322  | 0.999071534 | Ckap2         | Ckap2         | CKAP2    | 35.01983674 | 15.05967128 | 35.94899766 | 35.38487434 | 30.34678858 | 54.20781033 | 50.80150538 | 20.58657081 | 28.20614718 | 25.16320133 |
| ENSMUSG00000029110 | 0.297151449  | 6.315493104  | 1.072744755 | 0.300326293 | 0.999071534 | Rnf4          | Rnf4          | RNF4     | 102.533029  | 106.1291795 | 50.82676636 | 52.10596202 | 61.02058997 | 141.449642  | 116.6169588 | 52.36449891 | 63.01206139 | 62.15637524 |
| ENSMUSG00000044768 | 0.241626541  | 5.1571110329 | 1.071164997 | 0.300682449 | 0.999071534 | D1Ert622e     | D1Ert622e     | C5orf30  | 37.40595788 | 25.61329918 | 33.72743039 | 34.76043538 | 37.54107036 | 47.87750228 | 41.93551017 | 28.04747567 | 38.97005293 | 28.82330335 |
| ENSMUSG00000001918 | 0.315107614  | 4.720943757  | 1.070514581 | 0.300829243 | 0.999071534 | Slc1a5        | Slc1a5        | SLC1A5   | 30.17741442 | 20.1586151  | 22.28299293 | 23.38176991 | 25.57240158 | 44.53044285 | 47.17744895 | 12.57300634 | 17.6779744  | 23.13707343 |
| ENSMUSG00000021470 | 0.264837083  | 4.204138913  | 1.070482366 | 0.300836516 | 0.999071534 | Erc6l2        | Erc6l2        | ERC6L2   | 21.5452703  | 17.66843323 | 12.31960032 | 17.62305506 | 17.2008737  | 22.26522143 | 21.67962332 | 19.06675686 | 16.9708295  | 16.47045906 |
| ENSMUSG00000038290 | -0.240343012 | 5.203548462  | 1.070426562 | 0.300849116 | 0.999071534 | Smg6          | Smg6          | SMG6     | 33.96713623 | 44.82327357 | 40.99801419 | 37.60510175 | 49.24812888 | 44.74872934 | 20.25588866 | 34.47214374 | 28.83469642 | 35.29384083 |
| ENSMUSG00000031278 | -0.255161742 | 8.017229996  | 1.070007352 | 0.300943785 | 0.999071534 | Acs4l         | Acs4l         | ACSL4    | 271.3861897 | 349.5741018 | 269.6848027 | 288.4214169 | 283.2584943 | 251.1749816 | 249.8657481 | 227.3503508 | 187.6219484 | 224.638761  |
| ENSMUSG00000071350 | 0.42742015   | 2.512346496  | 1.069832019 | 0.300983392 | 0.999071534 | Setdb2        | Setdb2        | SETDB2   | 7.71980369  | 4.506043375 | 2.827449254 | 3.954780073 | 5.820827982 | 8.731459383 | 7.24811287  | 4.006782239 | 3.142746204 | 8.627383315 |
| ENSMUSG00000079184 | 0.356919426  | 6.436275621  | 1.069706587 | 0.301011173 | 0.999071534 | Mphosph8      | Mphosph8      | MPHOSPH8 | 50.45944412 | 49.03286672 | 117.4064643 | 91.93129118 | 82.47263017 | 71.37968045 | 46.01257366 | 74.26363632 | 129.6382809 | 128.822519  |
| ENSMUSG00000030401 | 0.509262353  | 1.763122377  | 1.069500773 | 0.301058237 | 0.999071534 | Rtn2          | Rtn2          | RTN2     | 2.877381375 | 2.134441599 | 3.90457278  | 3.607869541 | 1.373453794 | 4.656778337 | 2.847472913 | 2.279720929 | 5.342668547 | 3.071871332 |
| ENSMUSG00000022362 | -0.844295586 | 0.845393784  | 1.06937671  | 0.301086275 | 0.999071534 | 9130401M01Rik | Gm29394       | C8orf76  | 6.035482885 | 1.778701332 | 0.403921322 | 1.387642131 | 1.569661478 | 0.9459081   | 3.753487022 | 0.069082452 | 0.392843275 | 0.653589645 |
| ENSMUSG00000024812 | 0.337380213  | 3.44448304   | 1.069366206 | 0.301088649 | 0.999071534 | Tjp2          | Tjp2          | TJP2     | 12.1411458  | 10.0200175  | 10.36731393 | 5.411804311 | 11.77246109 | 18.55435119 | 10.28973166 | 8.08264693  | 10.52819978 | 11.50317775 |
| ENSMUSG00000019878 | 0.254550279  | 5.55759022   | 1.068950289 | 0.301182671 | 0.999071534 | Hsf2          | Hsf2          | HSF2     | 34.38821644 | 37.94562842 | 53.11565385 | 53.28545783 | 42.38085991 | 44.38491853 | 44.32997603 | 48.01230441 | 59.71217787 | 43.79050622 |
| ENSMUSG00000080893 | 0.252169232  | 5.520857536  | 1.068889856 | 0.301196336 | 0.999071534 | Gm15920       | Gm15920       |          | 39.02009865 | 29.40786203 | 50.69212592 | 49.33067776 | 47.80927253 | 44.31215637 | 65.81545347 | 53.46981815 | 31.11318742 | 46.14342894 |
| ENSMUSG00000020048 | 0.272157458  | 11.14589166  | 1.068806238 | 0.301215244 | 0.999071534 | Hsp90b1       | Hsp90b1       | HSP90B1  | 1795.626338 | 2293.220338 | 2106.247734 | 2194.486648 | 2253.837675 | 2083.107922 | 2592.624087 | 2295.748058 | 2418.186067 | 2370.831078 |
| ENSMUSG00000024798 | -0.727801452 | 0.572339715  | 1.068520708 | 0.301279822 | 0.999071534 | Htr7          | Htr7          | HTR7     | 3.438821644 | 2.430891821 | 0.807842644 | 1.318260024 | 0.784830739 | 2.837724299 | 0.582437641 | 0.345412262 | 1.021392516 | 0.392153787 |
| ENSMUSG00000092353 | 1.027014527  | -0.149864081 | 1.068189453 | 0.301354764 | 0.999071534 | Gm20539       | Gm20539       |          | 0.421080201 | 0.059290044 | 0.336601102 | 1.457024238 | 0.327012808 | 0.363810808 | 0           | 1.174401691 | 1.335667137 | 1.960768935 |
| ENSMUSG00000028653 | 0.275226716  | 3.961533929  | 1.068184714 | 0.301355836 | 0.999071534 | Trit1         | Trit1         | TRIT1    | 16.21158775 | 17.43127306 | 13.86796539 | 11.10113705 | 14.19235587 | 16.00767553 | 18.63800452 | 16.16529386 | 14.14235792 | 16.27438216 |
| ENSMUSG00000021782 | -0.243143727 | 5.215474298  | 1.068049625 | 0.301386405 | 0.999071534 | Dlg5          | Dlg5          | DLG5     | 35.44091694 | 39.2500094  | 44.76794653 | 43.15567027 | 45.45478031 | 56.1723887  | 22.8444986  | 35.50838053 | 22.15636074 | 31.82981571 |
| ENSMUSG00000096858 | 0.462049787  | 2.680868106  | 1.067803768 | 0.301444205 | 0.999071534 | Olfrr805      | Olfrr805      |          | 6.456563086 | 5.098943819 | 5.654889509 | 7.215739081 | 2.812310149 | 6.912405345 | 15.07866338 | 3.799534882 | 3.771295445 | 6.078383699 |
| ENSMUSG00000030256 | -0.379054012 | 3.708003764  | 1.067730315 | 0.301458677 | 0.999071534 | Bhlhe41       | Bhlhe41       | BHLHE41  | 7.088183388 | 17.90559341 | 13.12744297 | 20.32895722 | 16.93926345 | 18.26330254 | 4.530070544 | 11.32952219 | 9.035395336 | 12.22212636 |
| ENSMUSG00000034761 | 0.219590634  | 5.419863656  | 1.067560661 | 0.301497085 | 0.999071534 | Map4k5        | Map4k5        | MAP4K5   | 34.7391166  | 51.76020877 | 37.76664361 | 34.20537853 | 46.76283154 | 56.09962653 | 50.28378303 | 42.62387313 | 34.09879631 | 40.78399385 |
| ENSMUSG00000044475 | -0.269663252 | 4.581901463  | 1.067303803 | 0.301555248 | 0.999071534 | Ascc1         | Ascc1         | ASCC1    | 27.37021308 | 27.56987065 | 22.55227381 | 27.12840366 | 30.60839883 | 16.73529715 | 26.72741621 | 23.28078646 | 12.41384751 | 25.09784237 |
| ENSMUSG00000072214 | -0.272618311 | 6.449395956  | 1.067211129 | 0.3015762   | 0.999071534 | 5-Sep         | 5-Sep         | 5-Sep    | 83.72478002 | 142.4739767 | 74.86008502 | 80.20571517 | 116.220352  | 80.69323713 | 58.50262531 | 118.7527357 | 54.13380336 | 69.6072972  |
| ENSMUSG00000079057 | -0.273878806 | 4.204474846  | 1.066958311 | 0.301633503 | 0.999071534 | Cyp4v3        | Cyp4v3        | CYP4V2   | 21.05401006 | 29.6450222  | 18.64770103 | 19.63513615 | 14.97718661 | 20.73721603 | 17.99085159 | 15.8198816  | 12.57098482 | 13.66002358 |
| ENSMUSG00000041117 | 0.656860989  | 0.440464707  | 1.066787749 | 0.301672146 | 0.999071534 | Ccdc8         | Ccdc8         | CCDC8    | 0.631620302 | 1.185800888 | 1.88496617  | 0.416292639 | 0.850233301 | 1.309718907 | 1.553167044 | 1.105319238 | 2.121353688 | 0.980384468 |

|                     |              |              |             |              |             |               |               |         |             |             |             |             |             |             |             |             |             |             |
|---------------------|--------------|--------------|-------------|--------------|-------------|---------------|---------------|---------|-------------|-------------|-------------|-------------|-------------|-------------|-------------|-------------|-------------|-------------|
| ENSMUSG00000028874  | -0.432739977 | 3.258824105  | 1.066536587 | 0.301729061  | 0.999071534 | Fgr           | Fgr           | FGR     | 19.36968926 | 10.25717768 | 11.84835878 | 6.938210655 | 8.240722761 | 17.53568093 | 9.189571674 | 7.391822406 | 2.749902928 | 4.444409586 |
| ENSMUSG00000070031  | -0.282188273 | 5.175664869  | 1.066146171 | 0.30181756   | 0.999071534 | Sp140         | Sp140         | SP140   | 40.42369932 | 48.43996628 | 36.0836381  | 37.88263018 | 42.5770676  | 28.45000516 | 22.06791508 | 54.78238475 | 18.46363395 | 33.00627707 |
| ENSMUSG000000061410 | -0.240168889 | 5.730104603  | 1.065901119 | 0.301873125  | 0.999071534 | Zcchc14       | Zcchc14       | ZCCHC14 | 53.26664546 | 67.05704022 | 59.10715346 | 50.71831989 | 68.21487174 | 73.78083178 | 29.31602795 | 55.12779701 | 30.64177549 | 51.30678714 |
| ENSMUSG00000036777  | 0.26024081   | 6.958445181  | 1.065732081 | 0.3019111461 | 0.999071534 | Anln          | Anln          | ANLN    | 135.6580048 | 90.1208675  | 106.7698695 | 118.0189632 | 136.7567563 | 219.3051548 | 155.1872738 | 102.6565243 | 102.9249382 | 90.45680687 |
| ENSMUSG00000040212  | 0.259098052  | 6.758537037  | 1.064885718 | 0.302103505  | 0.999071534 | Emp3          | Emp3          | EMP3    | 108.779052  | 69.66580218 | 110.0685603 | 124.1939707 | 96.07636298 | 108.561145  | 136.5492692 | 86.4912304  | 118.7958065 | 110.391291  |
| ENSMUSG00000046805  | -0.420854688 | 7.516478043  | 1.064769095 | 0.30212998   | 0.999071534 | Mpeg1         | Mpeg1         | MPEG1   | 281.0008543 | 378.6262236 | 121.5129977 | 130.9934172 | 183.9774058 | 327.939062  | 251.8719222 | 85.1786638  | 62.85492408 | 76.99286019 |
| ENSMUSG00000049339  | -0.365473584 | 5.508636537  | 1.06454145  | 0.302181666  | 0.999071534 | Fam134a       | Fam134a       | FAM134A | 76.07515636 | 86.62275488 | 24.1679591  | 36.42560594 | 43.95052139 | 65.19489672 | 56.43173591 | 37.51177165 | 12.33527885 | 29.41153403 |
| ENSMUSG00000017677  | 0.280047111  | 7.638806836  | 1.064330634 | 0.302229542  | 0.999071534 | Wsb1          | Wsb1          | WSB1    | 177.2045847 | 212.7326793 | 184.2554431 | 177.4794286 | 182.3423417 | 168.2261174 | 181.267537  | 314.1869935 | 172.222492  | 203.6585334 |
| ENSMUSG00000043415  | 0.280970227  | 4.142589503  | 1.064130615 | 0.302274975  | 0.999071534 | Otud1         | Otud1         | OTUD1   | 19.08896912 | 14.52606088 | 12.45424076 | 18.10872981 | 17.92030188 | 23.64770249 | 12.42533635 | 19.34308667 | 19.01361453 | 18.10443317 |
| ENSMUSG00000022157  | -0.504213636 | 1.646216079  | 1.063878413 | 0.302332273  | 0.999071534 | Mcpt8         | Mcpt8         |         | 5.965302851 | 3.794562842 | 3.164050356 | 3.191576901 | 2.158284533 | 1.45524323  | 2.329750565 | 3.661369977 | 1.807079067 | 2.483640651 |
| ENSMUSG000000082791 | -1.177706732 | 0.754473906  | 1.063806422 | 0.302348631  | 0.999071534 | Gm4875        | Gm4875        |         | 2.947561409 | 6.818355107 | 0           | 0           | 1.438856355 | 3.492583753 | 0.841298815 | 0.483577167 | 0           | 0.326794823 |
| ENSMUSG00000039662  | -0.290617225 | 5.50675614   | 1.063286097 | 0.302466897  | 0.999071534 | Icmt          | Icmt          | ICMT    | 62.46022985 | 66.28626965 | 42.47905904 | 36.28684173 | 52.97607489 | 79.2379939  | 51.31922773 | 28.39288793 | 19.87786974 | 28.43114956 |
| ENSMUSG00000005413  | -0.474675335 | 7.472299737  | 1.062852475 | 0.302565502  | 0.999071534 | Hmox1         | Hmox1         | HMOX1   | 136.1492651 | 484.8739832 | 131.0051488 | 141.6088795 | 183.3233802 | 77.56446418 | 73.64600398 | 345.3431795 | 73.61882983 | 135.6198513 |
| ENSMUSG00000036273  | -0.255987106 | 5.664581524  | 1.06272385  | 0.302594759  | 0.999071534 | Lrrk2         | Lrrk2         | LRRK2   | 65.19725116 | 79.38936946 | 37.36272229 | 43.50258081 | 61.93622583 | 63.95793998 | 57.92018766 | 42.14029596 | 32.68456052 | 29.99976471 |
| ENSMUSG00000030322  | 0.343872809  | 3.374663552  | 1.062161107 | 0.302722804  | 0.999071534 | Mbd4          | Mbd4          | MBD4    | 11.22880537 | 9.367827016 | 6.328100712 | 8.256470679 | 11.83786365 | 9.386318836 | 9.836724609 | 9.602460883 | 13.19953406 | 11.89533154 |
| ENSMUSG00000020171  | 0.231542059  | 5.869631384  | 1.062016492 | 0.30275572   | 0.999071534 | Yeats4        | Yeats4        | YEATS4  | 54.38952599 | 35.33868647 | 63.34832734 | 64.5947412  | 59.97414898 | 61.84783729 | 68.01577345 | 65.55924732 | 47.61260499 | 60.84919595 |
| ENSMUSG00000055639  | -0.850482904 | 0.113877173  | 1.061453521 | 0.302883904  | 0.999071534 | Dach1         | Dach1         | DACH1   | 1.052700503 | 1.126510844 | 1.211763966 | 1.734552664 | 1.177246109 | 0.145524323 | 0.970729402 | 1.105319238 | 0.864255206 | 0           |
| ENSMUSG00000038525  | 0.242024084  | 5.285309354  | 1.061345684 | 0.302908466  | 0.999071534 | Armc10        | Armc10        | ARMC10  | 33.54605603 | 38.83497909 | 25.78364439 | 46.55539349 | 39.43774464 | 38.49118345 | 51.31922773 | 35.43929808 | 34.96305152 | 41.96045521 |
| ENSMUSG00000005774  | -0.401700337 | 3.809440584  | 1.061296671 | 0.302919631  | 0.999071534 | Rfx5          | Rfx5          | RFX5    | 15.36942735 | 13.28096995 | 17.36861685 | 18.24749402 | 17.59328907 | 17.60844309 | 6.406814054 | 15.19813953 | 2.592765618 | 18.36586903 |
| ENSMUSG00000015647  | 0.45641844   | 4.009828764  | 1.061200528 | 0.302941532  | 0.999071534 | Lama5         | Lama5         | LAMAS   | 9.263764428 | 18.37991377 | 14.20456649 | 14.98653501 | 12.88430463 | 16.73529715 | 3.818022315 | 40.55139956 | 9.742513232 | 18.2351511  |
| ENSMUSG00000033022  | 0.653922023  | 0.596200692  | 1.061057286 | 0.302974166  | 0.999071534 | Cdo1          | Cdo1          | CDO1    | 0.701800335 | 0.711480533 | 0.673202203 | 1.248877918 | 2.223687094 | 2.983248622 | 0.582437641 | 1.865226215 | 0.864255206 | 2.156845829 |
| ENSMUSG00000082838  | -0.868403115 | 3.443454547  | 1.061033834 | 0.30297951   | 0.999071534 | Gm14519       | Gm14519       |         | 20.00130956 | 31.06798327 | 3.096730136 | 2.497755836 | 16.54684808 | 12.95166475 | 11.58403753 | 13.74740803 | 0           | 0.588230681 |
| ENSMUSG00000031827  | -0.287676459 | 8.292249951  | 1.060787641 | 0.303035611  | 0.999071534 | Cotl1         | Cotl1         | COTL1   | 394.9732288 | 328.9411664 | 388.7747275 | 329.2874777 | 347.5492123 | 535.5295088 | 264.9444115 | 208.4908413 | 177.8008665 | 234.5079646 |
| ENSMUSG00000059602  | 0.822797892  | -0.173617098 | 1.059603091 | 0.303305728  | 0.999071534 | Syn3          | Syn3          | SYN3    | 0.350900168 | 0.296450222 | 1.211763966 | 0.346910533 | 0.654025616 | 0.291048646 | 0.517722348 | 0.552659619 | 1.414235792 | 1.699333077 |
| ENSMUSG00000029389  | 0.331612889  | 4.524938782  | 1.058957329 | 0.303453114  | 0.999071534 | Ddx55         | Ddx55         | DDX55   | 15.29924731 | 11.91729893 | 28.54377342 | 26.29581838 | 22.49848119 | 20.30064306 | 16.17882337 | 22.17546722 | 29.54181432 | 31.50302089 |
| ENSMUSG00000032245  | -0.314360107 | 3.619765161  | 1.058825663 | 0.303483177  | 0.999071534 | Cln6          | Cln6          | CLN6    | 10.52700503 | 18.26133368 | 12.99280253 | 13.52951078 | 14.6501738  | 17.82672957 | 11.19574577 | 9.326131073 | 5.735511822 | 10.1306395  |
| ENSMUSG00000024672  | -0.375009156 | 7.323627588  | 1.058822551 | 0.303483887  | 0.999071534 | Ms4a7         | Ms4a7         | MS4A7   | 276.8602323 | 155.3399163 | 128.9855422 | 215.2232945 | 160.6940938 | 199.0772739 | 275.2341432 | 69.15153485 | 55.94088243 | 100.7181643 |
| ENSMUSG00000031125  | 0.541491954  | 1.880880265  | 1.05869853  | 0.303512208  | 0.999071534 | 3830403N18Rik | 3830403N18Rik |         | 3.017741442 | 1.956571465 | 2.221567271 | 2.775284262 | 5.101399804 | 1.673529715 | 3.882917609 | 8.08264693  | 1.728510412 | 4.705845444 |
| ENSMUSG00000010205  | -0.240454731 | 5.258686532  | 1.058458802 | 0.30356696   | 0.999071534 | Raver1        | Raver1        | RAVER1  | 44.63450133 | 38.30136869 | 48.60519909 | 33.99723221 | 49.70594681 | 59.44668596 | 26.72741621 | 32.67599998 | 20.50641898 | 35.48991773 |
| ENSMUSG00000031835  | -0.250564821 | 6.503900294  | 1.058341994 | 0.303593643  | 0.999071534 | Mbtps1        | Mbtps1        | MBTPS1  | 104.63843   | 131.3867384 | 80.24570265 | 96.64927442 | 98.88867313 | 131.4084637 | 98.3025308  | 67.00997882 | 41.48424989 | 76.40462951 |
| ENSMUSG00000028920  | -0.301641523 | 4.312961004  | 1.05802248  | 0.303666645  | 0.999071534 | Fbxo42        | Fbxo42        | FBXO42  | 17.82572852 | 31.7794638  | 19.859465   | 15.95788451 | 28.31930917 | 28.66829164 | 12.36062105 | 19.06675686 | 8.721120716 | 19.60768935 |
| ENSMUSG00000032615  | 0.323586053  | 3.490133208  | 1.05749006  | 0.303788343  | 0.999071534 | Nt5m          | Nt5m          | NT5M    | 10.10592483 | 8.715636528 | 8.347707322 | 10.12978756 | 13.99614818 | 14.98900527 | 15.59638573 | 13.19474841 | 7.778296855 | 8.888819173 |
| ENSMUSG00000075581  | 0.887156623  | -0.348189879 | 1.057445346 | 0.303798566  | 0.999071534 | Gm16409       | Gm16409       |         | 1.19306057  | 0.652190488 | 0.201960661 | 0.138764213 | 0.261610246 | 0.582097292 | 0.582437641 | 1.105319238 | 1.492804447 | 0.196076894 |
| ENSMUSG00000020230  | -0.24683289  | 5.47756036   | 1.056742225 | 0.303959386  | 0.999071534 | Prmt2         | Prmt2         | PRMT2   | 54.10880586 | 62.55099685 | 35.747037   | 42.53123131 | 56.31160553 | 56.82724815 | 49.6366301  | 39.79149258 | 19.95643839 | 35.68599462 |
| ENSMUSG00000030737  | -0.562432467 | 2.371616326  | 1.05673378  | 0.303961318  | 0.999071534 | Skco2b1       | Skco2b1       | SLCO2B1 | 3.719541778 | 7.470545595 | 2.356207712 | 9.782877023 | 7.586697145 | 9.531843159 | 6.665675228 | 1.934308667 | 1.335667137 | 1.633974113 |
| ENSMUSG00000052248  | -0.396540633 | 2.443443495  | 1.056672315 | 0.303975382  | 0.999071534 | Gm13476       | Zeb2os        |         | 6.246022985 | 6.99622524  | 5.116336746 | 6.03624327  | 6.932671529 | 5.893735083 | 6.536244641 | 3.661369977 | 2.121353688 | 4.444409586 |
| ENSMUSG00000021485  | 0.430192586  | 3.531946035  | 1.056277778 | 0.304065675  | 0.999071534 | Mxd3          | Mxd3          | MXD3    | 16.21158775 | 4.268883197 | 14.13724627 | 6.799446442 | 9.41796887  | 18.69987551 | 22.97392919 | 6.217420715 | 8.799689371 | 8.300588492 |
| ENSMUSG00000060568  | -0.469565041 | 1.556940577  | 1.05575247  | 0.304185951  | 0.999071534 | Fam78b        | Fam78b        | FAM78B  | 4.631882214 | 3.557402664 | 2.894769475 | 2.150845303 | 3.793348573 | 2.837724299 | 1.876743511 | 1.72706131  | 1.964216377 | 3.006512367 |
| ENSMUSG00000045008  | 0.722423589  | 0.296288273  | 1.055750961 | 0.304186297  | 0.999071534 | 9030612E09Rik | 9030612E09Rik |         | 0.701800335 | 0.652190488 | 0.942483085 | 1.110113705 | 0.915635862 | 1.309718907 | 1.29430587  | 0.345412262 | 2.749902928 | 0.653589645 |

|                    |              |             |             |             |             |         |         |         |             |             |             |             |             |             |             |             |             |             |
|--------------------|--------------|-------------|-------------|-------------|-------------|---------|---------|---------|-------------|-------------|-------------|-------------|-------------|-------------|-------------|-------------|-------------|-------------|
| ENSMUSG00000085793 | -0.446959528 | 2.395814995 | 1.055531402 | 0.304236586 | 0.999071534 | Lin52   | Lin52   | LIN52   | 7.158363421 | 5.810424352 | 5.722218729 | 4.579219032 | 7.586697145 | 7.931075606 | 6.277383467 | 4.006782239 | 1.492804447 | 2.287563758 |
| ENSMUSG00000043251 | -0.374529247 | 2.885964941 | 1.055500956 | 0.30424356  | 0.999071534 | Exoc3l  | Exoc3l  | EXOC3L1 | 10.94808523 | 7.233385418 | 8.549667983 | 7.215739081 | 8.698540692 | 8.804221544 | 3.17104938  | 6.148338263 | 5.735511822 | 6.862691273 |
| ENSMUSG00000028476 | -0.748180277 | 0.06674527  | 1.055326312 | 0.30428357  | 0.999071534 | Reck    | Reck    | RECK    | 0.912340436 | 1.363671021 | 1.683005509 | 1.387642131 | 0.523220493 | 0.9459081   | 1.035444696 | 0.345412262 | 0.078568655 | 0.980384468 |
| ENSMUSG00000032532 | -0.739989848 | 2.912798887 | 1.054590528 | 0.304452211 | 0.999071534 | Cck     | Cck     | CKK     | 12.42186594 | 17.4905631  | 0.06732022  | 4.648601139 | 13.99614818 | 2.110102684 | 9.642578728 | 8.842553906 | 2.357059653 | 3.464025119 |
| ENSMUSG00000021939 | -0.293176652 | 11.09121919 | 1.054330344 | 0.304511873 | 0.999071534 | Ctsb    | Ctsb    | CTSB    | 2331.170174 | 3367.200202 | 1775.23421  | 2380.708222 | 2633.957363 | 1908.405972 | 2529.656107 | 2279.720929 | 1048.734408 | 1792.404243 |
| ENSMUSG00000000561 | 0.264375281  | 6.327762053 | 1.054281226 | 0.304523138 | 0.999071534 | Wdr77   | Wdr77   | WDR77   | 81.40883891 | 53.59820014 | 93.03654451 | 87.14392583 | 61.41300534 | 126.6789232 | 84.45345799 | 46.97606763 | 82.81136247 | 86.07775625 |
| ENSMUSG00000034177 | -0.431190597 | 2.169329714 | 1.054194818 | 0.304542957 | 0.999071534 | Rnf43   | Rnf43   | RNF43   | 5.75476275  | 6.521904885 | 2.625488593 | 5.550568524 | 5.559217736 | 6.112021568 | 4.206494076 | 3.108710358 | 2.199922343 | 2.875794438 |
| ENSMUSG00000041992 | -0.723945033 | 1.009029416 | 1.054041683 | 0.304578084 | 0.999071534 | Rapgef5 | Rapgef5 | RAPGEF5 | 1.684320805 | 6.46261484  | 1.279084186 | 1.80393477  | 0.850233301 | 4.365729691 | 1.164875283 | 0.27632981  | 0.864255206 | 0.71894861  |
| ENSMUSG00000031785 | -0.47521089  | 2.390171441 | 1.054025904 | 0.304581704 | 0.999071534 | Gpr56   | Adgrg1  | ADGRG1  | 9.193584394 | 8.774926572 | 3.029409915 | 6.730064335 | 3.073920395 | 8.367648575 | 3.300479967 | 3.246875263 | 3.8498641   | 2.483640651 |
| ENSMUSG00000039633 | -0.304292574 | 3.940829084 | 1.053891286 | 0.304612588 | 0.999071534 | Lonrf1  | Lonrf1  | LONRF1  | 17.54500839 | 15.53399163 | 25.58168373 | 12.21125075 | 16.67765321 | 15.64386473 | 10.74273872 | 18.51409724 | 10.21392516 | 10.84958811 |
| ENSMUSG00000036698 | -0.283573212 | 6.363126069 | 1.052800032 | 0.304863095 | 0.999071534 | Ago2    | Ago2    | AGO2    | 59.09158824 | 142.2368165 | 88.93001107 | 85.75628369 | 92.41381954 | 84.54963169 | 39.21746785 | 94.29754752 | 62.61921811 | 76.46998847 |
| ENSMUSG00000032733 | -0.3544336   | 3.798330298 | 1.052445282 | 0.304944588 | 0.999071534 | Snx33   | Snx33   | SNX33   | 14.45708691 | 24.24962816 | 11.9151679  | 14.63962448 | 15.10799173 | 20.8099782  | 10.35444696 | 16.64887103 | 4.635550651 | 8.431306421 |
| ENSMUSG00000056770 | -0.229764399 | 6.406815675 | 1.052190814 | 0.305003062 | 0.999071534 | Setd3   | Setd3   | SETD3   | 96.35718605 | 129.548747  | 84.21759565 | 71.87986238 | 94.63750663 | 97.93786941 | 78.56436628 | 84.21150947 | 46.59121247 | 75.75103986 |
| ENSMUSG00000020123 | 1.30649779   | -0.89888695 | 1.052064125 | 0.305032179 | 0.999071534 | Avpr1a  | Avpr1a  | AVPR1A  | 0.491260235 | 0.415030311 | 0.134640441 | 0           | 0.130805123 | 1.673529715 | 1.29430587  | 0           | 0           | 0.065358965 |
| ENSMUSG00000027544 | -0.423671481 | 2.648618181 | 1.051400584 | 0.30518474  | 0.999071534 | Nfatc2  | Nfatc2  | NFATC2  | 10.456825   | 6.640484974 | 7.472544458 | 3.746633754 | 8.502333007 | 11.05984855 | 4.46535525  | 4.973936572 | 2.671334273 | 3.464025119 |
| ENSMUSG00000057342 | -0.252832396 | 4.599326109 | 1.051158267 | 0.305240478 | 0.999071534 | Sphk2   | Sphk2   | SPHK2   | 31.65119513 | 28.39993127 | 23.96599844 | 27.47531419 | 24.59136316 | 32.5246862  | 18.12028217 | 16.85611838 | 14.53520119 | 26.73181648 |
| ENSMUSG00000041560 | -0.215104676 | 6.477111154 | 1.051123962 | 0.30524837  | 0.999071534 | Gltscr2 | Gltscr2 | GLTSCR2 | 95.44484562 | 118.4022187 | 83.61171366 | 99.97961554 | 98.56166033 | 97.35577212 | 72.4164134  | 82.00087099 | 62.4620808  | 85.88167936 |
| ENSMUSG00000034342 | -0.284138577 | 4.683614178 | 1.050896337 | 0.305300743 | 0.999071534 | Cbl     | Cbl     | CBL     | 26.94913288 | 45.41617402 | 26.65880726 | 19.14946141 | 28.31930917 | 38.27289696 | 17.99085159 | 26.18224946 | 12.72812213 | 19.93448417 |
| ENSMUSG00000069793 | 0.455617678  | 3.380382505 | 1.050830725 | 0.305315841 | 0.999071534 | Slfm9   | Slfm9   | SLFM13  | 15.72032751 | 9.367827016 | 3.635291898 | 5.273040098 | 11.51085084 | 29.32315109 | 10.9368846  | 8.704389002 | 6.756904338 | 5.555511983 |
| ENSMUSG00000086748 | 0.767017162  | 0.282995171 | 1.050339388 | 0.305428936 | 0.999071534 | Gm13261 | Gm13261 |         | 1.614140771 | 0.474320355 | 1.279084186 | 0.416292639 | 0.457817931 | 0.582097292 | 1.359021163 | 2.003391119 | 2.042785033 | 0.326794823 |
| ENSMUSG00000031298 | 0.470679662  | 2.278815806 | 1.049776895 | 0.305558475 | 0.999071534 | Gpr64   | Adgrg2  | ADGRG2  | 1.965040939 | 6.403324796 | 5.85685917  | 2.081463196 | 4.316569065 | 3.929156722 | 4.012348196 | 7.599069763 | 4.714119306 | 5.751588876 |
| ENSMUSG00000041308 | -0.300824518 | 4.039281125 | 1.049659175 | 0.305585595 | 0.999071534 | Sntb2   | Sntb2   | SNTB2   | 19.01878909 | 28.5778014  | 14.81044848 | 14.8477708  | 16.48144552 | 25.03018356 | 13.97850339 | 13.40199576 | 9.899650542 | 10.45743432 |
| ENSMUSG00000040552 | -0.260409426 | 5.671182335 | 1.04954832  | 0.305611136 | 0.999071534 | C3ar1   | C3ar1   | C3AR1   | 52.98592532 | 76.83989755 | 36.62219987 | 61.68069272 | 59.32012337 | 71.45244261 | 60.96180646 | 35.02480336 | 26.55620542 | 36.53566116 |
| ENSMUSG00000029028 | -0.301646305 | 4.998494115 | 1.049541089 | 0.305612802 | 0.999071534 | Lrrc47  | Lrrc47  | LRRC47  | 49.33656358 | 42.39238175 | 25.78364439 | 32.60959008 | 32.89748848 | 63.44860485 | 26.66270091 | 19.55033403 | 14.84947581 | 21.56845829 |
| ENSMUSG00000029911 | 0.249068608  | 5.235505311 | 1.049427816 | 0.305638903 | 0.999071534 | Ssbp1   | Ssbp1   | SSBP1   | 38.45865838 | 26.85839012 | 43.08494102 | 35.03796381 | 34.53255252 | 39.1460429  | 60.76766058 | 34.33397884 | 29.77752028 | 33.136995   |
| ENSMUSG00000035914 | -0.307540831 | 5.223056946 | 1.048958594 | 0.305747054 | 0.999071534 | Cd276   | Cd276   | CD276   | 44.21342113 | 43.87463286 | 54.46205826 | 35.66240277 | 35.70979863 | 72.32558855 | 39.92933608 | 21.48464269 | 17.44224143 | 19.01945867 |
| ENSMUSG00000033444 | -0.226922881 | 5.579227519 | 1.048732133 | 0.305799269 | 0.999071534 | Specc1l | Specc1l | SPECC1L | 49.68746375 | 70.02154244 | 45.37382851 | 42.11493868 | 60.75897972 | 68.25090751 | 39.7351902  | 44.00552217 | 29.38467701 | 36.14350737 |
| ENSMUSG00000082769 | 0.753718652  | 1.28074626  | 1.048227142 | 0.305915746 | 0.999071534 | Gm15793 | Gm15793 |         | 2.38612114  | 1.778701332 | 1.144443746 | 2.497755836 | 1.046440986 | 1.673529715 | 4.206494076 | 5.043019025 | 2.671334273 | 0           |
| ENSMUSG00000030156 | -0.544545272 | 1.695809539 | 1.047157152 | 0.30616273  | 0.999071534 | Cd69    | Cd69    | CD69    | 7.789983723 | 3.438822576 | 3.567971678 | 2.01208109  | 2.485297341 | 4.074681045 | 1.035444696 | 1.588896405 | 3.378452169 | 2.091486864 |
| ENSMUSG00000035852 | 0.725984253  | 0.784564043 | 1.047131326 | 0.306168695 | 0.999071534 | Misp    | Misp    | MISP    | 0.421080201 | 0.770770577 | 1.279084186 | 1.595788451 | 2.158284533 | 0.436572969 | 0.453007054 | 3.246875263 | 2.042785033 | 3.006512367 |
| ENSMUSG00000057594 | 0.389998887  | 2.784155727 | 1.046433554 | 0.306329904 | 0.999071534 | Arl16   | Arl16   | ARL16   | 6.807463254 | 5.988294485 | 5.116336746 | 3.191576901 | 9.548773993 | 8.14936209  | 8.089411685 | 7.529987311 | 4.16413872  | 9.542408818 |
| ENSMUSG00000026049 | 0.310683402  | 4.828452647 | 1.046362267 | 0.30634638  | 0.999071534 | Tex30   | Tex30   | TEX30   | 34.80929664 | 17.90559341 | 26.25488593 | 31.36071216 | 20.27479409 | 30.41458352 | 56.04344415 | 19.96482874 | 18.46363395 | 27.97363681 |
| ENSMUSG00000031520 | 0.292800422  | 5.605032883 | 1.046188864 | 0.306386461 | 0.999071534 | Vegfc   | Vegfc   | VEGFC   | 31.01957483 | 36.46337731 | 75.19668612 | 34.13599642 | 49.83675194 | 43.80282124 | 35.33455024 | 60.99980546 | 58.84792267 | 52.22181264 |
| ENSMUSG00000035640 | -0.476672728 | 2.517430267 | 1.046122147 | 0.306401885 | 0.999071534 | Dos     | Cbap    | CBARP   | 7.228543455 | 8.952796705 | 4.241173882 | 6.452535909 | 6.932671529 | 6.548594537 | 1.553167044 | 7.944482025 | 1.649941757 | 5.490153018 |
| ENSMUSG00000019966 | 0.255426442  | 6.672403265 | 1.045239123 | 0.306606113 | 0.999071534 | Kltl    | Kltl    | KITLG   | 79.65433807 | 129.0744267 | 72.97511885 | 82.77285311 | 119.0980647 | 94.00871269 | 112.0868883 | 134.227205  | 98.13225022 | 89.14962758 |
| ENSMUSG00000089698 | -1.839176389 | 0.810351481 | 1.044791984 | 0.306709596 | 0.999071534 | Gm2541  | Gm2541  |         | 3.158101509 | 9.96072746  | 0           | 0           | 0           | 0           | 3.365195261 | 0           | 0           | 0           |
| ENSMUSG00000046743 | -0.367034102 | 3.280630443 | 1.0446484   | 0.306742836 | 0.999071534 | Fat4    | Fat4    | FAT4    | 6.175842952 | 12.92522968 | 10.70391503 | 14.50086027 | 11.38004572 | 11.42365936 | 6.795105815 | 11.53676955 | 4.242707375 | 7.320204025 |
| ENSMUSG00000028495 | 0.32837131   | 9.546855198 | 1.044549707 | 0.306765686 | 0.999071534 | Rps6    | Rps6    | RPS6    | 691.4838705 | 468.8063811 | 848.9752987 | 857.0077801 | 554.4829172 | 492.5998335 | 723.7758423 | 711.2038474 | 989.4936423 | 949.7964722 |
| ENSMUSG00000027386 | -0.478219609 | 3.16799022  | 1.0443528   | 0.306811282 | 0.999071534 | Fbln7   | Fbln7   | FBLN7   | 5.75476275  | 12.62877946 | 7.943786    | 8.880909638 | 18.50892493 | 3.929156722 | 2.912188207 | 12.64208879 | 4.242707375 | 11.43781879 |

|                     |              |             |             |             |             |               |               |          |             |             |             |             |             |             |             |             |             |             |
|---------------------|--------------|-------------|-------------|-------------|-------------|---------------|---------------|----------|-------------|-------------|-------------|-------------|-------------|-------------|-------------|-------------|-------------|-------------|
| ENSMUSG00000039789  | -0.287795102 | 3.758855757 | 1.041821491 | 0.307398219 | 0.999071534 | Zfp597        | Zfp597        | ZNF597   | 16.77302802 | 16.60121243 | 13.53136429 | 14.01518552 | 15.69661478 | 16.58977283 | 15.46695514 | 8.704389002 | 8.956826681 | 9.542408818 |
| ENSMUSG00000040327  | -0.552005564 | 1.364865956 | 1.041776116 | 0.307408754 | 0.999071534 | Cu9           | Cu9           | CUL9     | 4.842422314 | 3.023792265 | 2.625488593 | 3.052812688 | 1.504258917 | 2.619437815 | 0.970729402 | 2.763298096 | 0.628549241 | 2.810435474 |
| ENSMUSG000000024170 | 0.295542217  | 4.081563202 | 1.041705805 | 0.307425078 | 0.999071534 | Telo2         | Telo2         | TELO2    | 21.19437013 | 13.10309981 | 14.13724627 | 13.7376571  | 16.3506404  | 25.53951869 | 10.9368846  | 13.47107822 | 18.62077126 | 21.11094554 |
| ENSMUSG00000030330  | -0.262663436 | 4.675909024 | 1.041052216 | 0.30757688  | 0.999071534 | Ing4          | Ing4          | ING4     | 37.75685805 | 27.98490096 | 24.43723998 | 25.04694046 | 29.23494503 | 26.48542679 | 25.7566868  | 29.70545453 | 10.92104306 | 20.71879175 |
| ENSMUSG00000021660  | 0.278066429  | 9.676295383 | 1.040939315 | 0.307603113 | 0.999071534 | Btf3          | Btf3          | BTF3     | 791.4202383 | 657.6451726 | 759.3047652 | 793.8700631 | 833.7518552 | 647.1466646 | 1155.297419 | 853.3755344 | 744.1237324 | 868.4899203 |
| ENSMUSG00000038400  | 0.345829097  | 8.848515707 | 1.040934249 | 0.30760429  | 0.999071534 | Pmepa1        | Pmepa1        | PMEPA1   | 330.4777779 | 348.5661711 | 554.3146943 | 432.5280522 | 435.6464628 | 376.3258994 | 222.3617484 | 536.3561604 | 613.7783336 | 654.6353885 |
| ENSMUSG00000002948  | -0.223731433 | 5.344861777 | 1.04060984  | 0.307679682 | 0.999071534 | Map2k7        | Map2k7        | MAP2K7   | 47.58206274 | 50.21866761 | 40.25749176 | 43.36381659 | 45.32397519 | 49.76931848 | 27.50399973 | 41.31130653 | 22.86347863 | 42.352609   |
| ENSMUSG00000031557  | -0.230029756 | 6.922470071 | 1.039676843 | 0.307896642 | 0.999071534 | Plekha2       | Plekha2       | PLEKHA2  | 135.2369246 | 160.7353104 | 144.9404344 | 106.5709157 | 133.4866282 | 120.9307124 | 109.6277072 | 127.5262071 | 72.91171193 | 111.4370345 |
| ENSMUSG00000040287  | 0.705084746  | 1.089295373 | 1.039525446 | 0.307931866 | 0.999071534 | Stac3         | Stac3         | STAC3    | 2.526481208 | 0.830060622 | 2.558168373 | 0           | 2.092881971 | 1.673529715 | 1.941458804 | 3.661369977 | 1.728510412 | 2.810435474 |
| ENSMUSG00000029014  | 0.274519077  | 7.125849023 | 1.038202614 | 0.308239865 | 0.999071534 | Dnajc2        | Dnajc2        | DNAJC2   | 113.4109342 | 96.58348234 | 182.6397578 | 136.3358394 | 124.5918798 | 167.134685  | 109.6924224 | 117.3020042 | 164.7584697 | 169.6718719 |
| ENSMUSG00000079481  | -0.614843842 | 1.404869189 | 1.037963919 | 0.308295484 | 0.999071534 | Nhsl2         | Nhsl2         | NHSL2    | 2.807201342 | 2.54947191  | 8.145746661 | 1.110113705 | 1.177246109 | 3.565345915 | 1.812028217 | 1.4507315   | 0.707117896 | 2.483640651 |
| ENSMUSG00000038384  | 0.32568598   | 4.521385633 | 1.037761558 | 0.308342646 | 0.999071534 | Setd1b        | Setd1b        | SETD1B   | 14.80798708 | 18.43920381 | 24.57188042 | 25.18570468 | 21.64824789 | 25.39399437 | 11.13103048 | 26.52766172 | 33.23454111 | 22.74491965 |
| ENSMUSG00000025026  | -0.26802341  | 5.10651642  | 1.037314698 | 0.308446826 | 0.999071534 | Add3          | Add3          | ADD3     | 28.35273355 | 42.80741206 | 35.14115502 | 45.02898715 | 42.64247016 | 29.97801055 | 17.21426807 | 38.61709089 | 29.46324566 | 33.00627707 |
| ENSMUSG00000050394  | 0.731610552  | 0.539849963 | 1.037227498 | 0.30846716  | 0.999071534 | Armxc6        | Armxc6        | ARMXC6   | 0.771980369 | 1.897281421 | 0.807842644 | 0.138764213 | 1.569661478 | 3.201535107 | 2.9769035   | 0.621742072 | 0.942823861 | 0.588230681 |
| ENSMUSG00000038074  | -0.313676603 | 4.19476391  | 1.037122067 | 0.308491749 | 0.999071534 | Fkbp14        | Fkbp14        | FKBP14   | 14.45708691 | 27.09555029 | 16.83005509 | 24.42250151 | 21.4520402  | 19.79130793 | 23.55636683 | 14.3691501  | 6.364061063 | 16.33974113 |
| ENSMUSG00000029438  | 0.391562573  | 2.745424883 | 1.036948424 | 0.308532251 | 0.999071534 | Bcl7a         | Bcl7a         | BCL7A    | 5.052962415 | 3.675982753 | 9.82875217  | 5.064893778 | 5.886230544 | 10.84156207 | 6.212668174 | 6.908245239 | 6.914041649 | 5.490153018 |
| ENSMUSG00000047415  | -0.600792278 | 0.975629812 | 1.036810596 | 0.308564405 | 0.999071534 | Gpr68         | Gpr68         | GPR68    | 4.000261912 | 3.438822576 | 2.086926831 | 1.318260024 | 0.654025616 | 2.110102684 | 2.135604685 | 0.828989429 | 0.864255206 | 1.241820326 |
| ENSMUSG00000028609  | 0.251420065  | 6.377597525 | 1.036447992 | 0.308649016 | 0.999071534 | Magoh         | Magoh         | MAGOH    | 76.28569646 | 55.25832139 | 101.5188923 | 83.6748205  | 75.6053612  | 71.81625342 | 109.3041307 | 83.10619023 | 88.5468743  | 74.63993746 |
| ENSMUSG00000036046  | -0.247486446 | 6.570138841 | 1.035969465 | 0.308760724 | 0.999071534 | 5031439G07Rik | 5031439G07Rik | KIAA0930 | 120.6394777 | 128.9558466 | 110.3378411 | 76.45908142 | 100.6545423 | 158.6215121 | 68.14520403 | 73.50372935 | 56.33372571 | 78.30003948 |
| ENSMUSG00000031274  | -0.360159639 | 3.829451114 | 1.035774612 | 0.308806226 | 0.999071534 | Col4a5        | Col4a5        | COL4A5   | 9.404124495 | 14.88180115 | 19.25358302 | 16.9986161  | 21.4520402  | 14.1886215  | 10.03087049 | 6.079255811 | 17.59937874 | 10.19599846 |
| ENSMUSG00000051506  | -0.469416339 | 3.059152912 | 1.035741609 | 0.308813933 | 0.999071534 | Wdfy4         | Wdfy4         | WDFY4    | 10.80772517 | 14.52606088 | 5.654898509 | 10.06040545 | 8.371527884 | 19.93683226 | 5.824376413 | 3.17779281  | 2.749902928 | 4.575127515 |
| ENSMUSG00000033335  | -0.274290966 | 5.358682297 | 1.035589834 | 0.308849383 | 0.999071534 | Dnm2          | Dnm2          | DNM2     | 52.42448506 | 58.22282361 | 44.83526675 | 29.76492371 | 48.65950583 | 71.16139397 | 38.95860667 | 32.81416489 | 16.81369219 | 28.23507267 |
| ENSMUSG00000026770  | -0.550458729 | 2.063070201 | 1.035570889 | 0.308853808 | 0.999071534 | Il2ra         | Il2ra         | IL2RA    | 9.12340436  | 8.122736084 | 3.971893    | 1.80393477  | 2.158284533 | 5.529924276 | 1.29430587  | 4.90485412  | 2.042785033 | 2.483640651 |
| ENSMUSG00000051344  | -0.348768127 | 3.323471486 | 1.035276866 | 0.308922498 | 0.999071534 | Plekhn3       | Plekhn3       | PLEKHM3  | 11.2989854  | 18.5577839  | 10.70391503 | 6.175007483 | 11.05303291 | 9.968416129 | 7.118682283 | 9.326131073 | 8.32827744  | 6.993409202 |
| ENSMUSG00000040651  | 0.241810249  | 5.352628278 | 1.035115819 | 0.30896013  | 0.999071534 | D14Abb1e      | Fam208a       | FAM208A  | 29.33525402 | 37.29343793 | 38.77644692 | 39.2008902  | 48.98651864 | 38.85499425 | 43.55339251 | 40.96589427 | 48.94827213 | 36.01278944 |
| ENSMUSG00000045394  | 0.766300493  | 1.479671676 | 1.034776149 | 0.309039521 | 0.999071534 | Epcam         | Epcam         | EPCAM    | 3.158101509 | 1.48225111  | 3.164050356 | 1.387642131 | 0.981038424 | 14.47967014 | 0.647152935 | 0.483577167 | 0.628549241 | 2.418281687 |
| ENSMUSG00000045776  | 0.723104559  | 0.606245425 | 1.034577394 | 0.309085989 | 0.999071534 | Lrtm1         | Lrtm1         | LRTM1    | 0.912340436 | 0.474320355 | 1.683005509 | 1.665170557 | 0.719428178 | 0.509335131 | 0.970729402 | 0.690824524 | 3.378452169 | 2.287563758 |
| ENSMUSG00000014444  | -0.266283796 | 6.987527112 | 1.034468744 | 0.309111394 | 0.999071534 | Plezo1        | Plezo1        | PIEZO1   | 157.9050755 | 197.4951379 | 118.2816271 | 125.9285234 | 120.4061159 | 205.6986306 | 116.2933824 | 91.60333187 | 63.87631659 | 101.7639077 |
| ENSMUSG00000080115  | 0.560536154  | 0.895684396 | 1.034208339 | 0.309172295 | 0.999071534 | Mettl21b      | Mettl21b      | METTL21B | 2.035220973 | 0.830060622 | 1.615685288 | 0.693821065 | 2.158284533 | 2.473913492 | 1.229590576 | 1.796143762 | 2.199922343 | 2.222204793 |
| ENSMUSG00000073940  | -0.570951001 | 4.41706917  | 1.033756367 | 0.309278035 | 0.999071534 | Hbb-bt        | Hbb-bt        | HBB      | 19.15914916 | 78.44072875 | 5.85685917  | 17.62305506 | 11.24924059 | 9.09527019  | 30.54561852 | 26.45857927 | 9.506807267 | 5.94766577  |
| ENSMUSG00000024535  | 0.266037841  | 4.526494997 | 1.033578502 | 0.30931966  | 0.999071534 | Snx24         | Snx24         | SNX24    | 15.93086761 | 22.23376665 | 26.86076792 | 18.94131509 | 24.06814267 | 28.66829164 | 16.17882337 | 29.98178434 | 21.05639957 | 24.83640651 |
| ENSMUSG00000027787  | 0.249828474  | 6.13177084  | 1.033531783 | 0.309330595 | 0.999071534 | Nmd3          | Nmd3          | NMD3     | 83.30369981 | 62.61028689 | 69.33982695 | 67.64755389 | 48.65950583 | 94.59080998 | 111.5044507 | 52.15725156 | 46.51264382 | 69.6072972  |
| ENSMUSG00000049288  | -0.230445162 | 6.927285445 | 1.033274566 | 0.309390805 | 0.999071534 | Lix1l         | Lix1l         | LIX1L    | 122.3237985 | 128.8372665 | 147.0946814 | 148.8940007 | 132.3747847 | 125.6602529 | 85.87719445 | 114.4696236 | 89.4869816  | 125.6199298 |
| ENSMUSG00000051736  | 0.482323756  | 2.036201092 | 1.032995935 | 0.309456046 | 0.999071534 | Fam229b       | Fam229b       | FAM229B  | 3.789721811 | 2.01586151  | 5.99149961  | 2.844666369 | 2.550699902 | 3.128772945 | 4.983077598 | 2.832380548 | 3.353589479 | 7.646998847 |
| ENSMUSG00000071632  | 0.339460991  | 3.710144653 | 1.032256721 | 0.309629218 | 0.999071534 | 2510002D24Rik | 2510002D24Rik | C22orf39 | 8.140883891 | 11.14652835 | 16.89737531 | 14.08456763 | 8.698540692 | 10.55051342 | 11.19574577 | 13.88557293 | 16.18514295 | 16.07830527 |
| ENSMUSG00000009076  | -0.276967708 | 3.954290698 | 1.032007454 | 0.30968764  | 0.999071534 | Zmat5         | Zmat5         | ZMAT5    | 20.35220973 | 14.64464097 | 17.57057751 | 18.0393477  | 16.74305577 | 17.53568093 | 17.27898336 | 13.0565835  | 10.29249382 | 9.673126747 |
| ENSMUSG00000070972  | 0.300994717  | 3.991579564 | 1.031915386 | 0.309709223 | 0.999071534 | Dnajc25       | Dnajc25       | DNAJC25  | 11.0884453  | 13.93316044 | 17.43593707 | 17.9699656  | 12.49188926 | 18.99092416 | 18.57328923 | 15.88896405 | 18.62077126 | 11.045665   |
| ENSMUSG00000054594  | 1.42988976   | 0.423586511 | 1.03167889  | 0.309764671 | 0.999071534 | Oscar         | Oscar         | OSCAR    | 2.315941107 | 0           | 0.134640441 | 0           | 0.981038424 | 2.255627007 | 6.600959935 | 0           | 0.078568655 | 0           |
| ENSMUSG00000037300  | 0.317259402  | 5.429379364 | 1.031057648 | 0.309910386 | 0.999071534 | Ttc13         | Ttc13         | TTC13    | 52.28412499 | 43.69676273 | 32.85226753 | 30.88936267 | 40.3533805  | 68.8330048  | 83.93573564 | 19.48125158 | 33.15597245 | 30.65335435 |

|                     |              |              |             |             |             |               |               |               |             |             |             |             |             |             |             |             |             |             |
|---------------------|--------------|--------------|-------------|-------------|-------------|---------------|---------------|---------------|-------------|-------------|-------------|-------------|-------------|-------------|-------------|-------------|-------------|-------------|
| ENSMUSG00000054206  | 0.910903085  | 0.0171109    | 1.030771016 | 0.309977647 | 0.999071534 | Gzmm          | Gzmm          | GZMM          | 0.842160403 | 0.177870133 | 0.875162864 | 0           | 1.373453794 | 0.436572969 | 0.388291761 | 0.759906976 | 1.885647722 | 1.830051006 |
| ENSMUSG000000025766 | -0.612116449 | 0.590285158  | 1.03049878  | 0.310041547 | 0.999071534 | D3Ertd751e    | D3Ertd751e    | C4orf33       | 1.824680872 | 0.711480533 | 2.558168373 | 1.734552664 | 1.765869163 | 0.727621615 | 0.776583522 | 1.105319238 | 0.785686551 | 1.764692042 |
| ENSMUSG000000022629 | 0.361322772  | 4.256642089  | 1.029962847 | 0.310167394 | 0.999071534 | Kif21a        | Kif21a        | KIF21A        | 12.21132584 | 17.66843323 | 19.05162236 | 18.52502245 | 18.57432749 | 13.38823772 | 8.348272859 | 27.21848624 | 27.57759794 | 21.96061207 |
| ENSMUSG000000020650 | 0.268576863  | 5.017004222  | 1.029424782 | 0.310293808 | 0.999071534 | Bcap29        | Bcap29        | BCAP29        | 34.3180364  | 33.20242487 | 26.86076792 | 32.8871185  | 24.32975291 | 30.48734568 | 59.47335471 | 27.97839322 | 23.02061594 | 29.60761092 |
| ENSMUSG00000007950  | -0.215935028 | 5.865862299  | 1.029122416 | 0.310364876 | 0.999071534 | Abhd8         | Abhd8         | ABHD8         | 67.5833723  | 58.81572405 | 47.662716   | 67.09249703 | 83.7806814  | 62.64822107 | 48.34232423 | 51.8118393  | 38.18436638 | 61.17599078 |
| ENSMUSG00000030681  | -0.280862461 | 7.245680645  | 1.028841405 | 0.310430944 | 0.999071534 | Mvp           | Mvp           | MVP           | 160.5719167 | 152.0196739 | 193.1417122 | 167.4190231 | 190.1252466 | 159.7129445 | 65.491877   | 162.6200929 | 103.2392128 | 172.6783842 |
| ENSMUSG00000032690  | -0.417788225 | 2.689130992  | 1.028742432 | 0.310454217 | 0.999071534 | Oas2          | Oas2          | OAS2          | 8.561964092 | 8.597056439 | 8.280387102 | 5.203657991 | 6.998074091 | 9.240794513 | 2.847472913 | 7.115492597 | 1.964216377 | 6.013024734 |
| ENSMUSG00000002055  | 0.238504593  | 5.117019385  | 1.028689774 | 0.310466601 | 0.999071534 | Spag5         | Spag5         | RP11-192H23.4 | 40.56405939 | 21.10725581 | 37.43004251 | 30.38936267 | 35.38278582 | 49.69655632 | 40.7059196  | 28.18564058 | 31.58459935 | 32.28732847 |
| ENSMUSG00000060279  | -0.237138739 | 5.632166361  | 1.02862169  | 0.310482613 | 0.999071534 | Ap2a1         | Ap2a1         | AP2A1         | 58.45996794 | 64.68543845 | 49.00912041 | 38.99274388 | 68.34567687 | 77.78275067 | 36.11113376 | 41.86396615 | 26.32049946 | 45.16304447 |
| ENSMUSG000000059027 | 0.620276612  | 0.800655555  | 1.028392827 | 0.310536446 | 0.999071534 | 9630013D21Rik | 9630013D21Rik |               | 1.263240604 | 0.474320355 | 2.558168373 | 1.110113705 | 1.177246109 | 1.236956746 | 1.941458804 | 3.385040167 | 0.864255206 | 1.960768935 |
| ENSMUSG000000027599 | 0.285135997  | 5.8807835    | 1.02804169  | 0.310619063 | 0.999071534 | Armc1         | Armc1         | ARMC1         | 74.03993539 | 53.71678023 | 58.70323214 | 44.33516608 | 45.1277675  | 80.183902   | 115.4520836 | 38.8934207  | 40.38428872 | 43.20227554 |
| ENSMUSG000000047804 | 0.287493332  | 3.848604753  | 1.02748283  | 0.310750613 | 0.999071534 | Akap10        | Akap10        | AKAP10        | 11.86042567 | 17.19411288 | 10.70391503 | 11.58681179 | 15.56580966 | 21.173789   | 18.63800452 | 15.33630443 | 9.428238612 | 12.81035704 |
| ENSMUSG000000055069 | 0.886423102  | -0.1427474   | 1.026584392 | 0.310962248 | 0.999071534 | Rab39         | Rab39         | RAB39A        | 1.19306057  | 0.889350666 | 0           | 0.555056852 | 0.196207685 | 0.436572969 | 1.617882337 | 1.381649048 | 0.864255206 | 0.457512752 |
| ENSMUSG000000078899 | 0.228360734  | 4.992320974  | 1.026566701 | 0.310966417 | 0.999071534 | Gm4631        | Gm4631        | ZNF788        | 32.14245536 | 28.45922132 | 26.72612748 | 32.74835429 | 31.327827   | 35.21688618 | 46.33615013 | 31.01802112 | 23.17775325 | 30.39191849 |
| ENSMUSG000000054277 | -0.25405747  | 5.673119548  | 1.026553429 | 0.310969545 | 0.999071534 | Arfgap3       | Arfgap3       | ARFGAP3       | 42.17820016 | 66.87917009 | 57.69342883 | 58.97479057 | 61.21679765 | 45.62187527 | 30.93391028 | 70.60226635 | 32.99883514 | 43.33299347 |
| ENSMUSG000000021607 | 0.248463819  | 5.503295814  | 1.026365966 | 0.311013729 | 0.999071534 | MrpI36        | MrpI36        | MRPL36        | 47.65224277 | 25.96093945 | 46.24899137 | 45.584044   | 48.92111607 | 46.56778337 | 54.29613123 | 33.2286596  | 46.51264382 | 54.24794054 |
| ENSMUSG000000029838 | 0.45409245   | 3.923455096  | 1.026079584 | 0.311081243 | 0.999071534 | Ptn           | Ptn           | PTN           | 10.52700503 | 11.56155866 | 18.91698192 | 14.29271395 | 10.26820217 | 46.42225905 | 15.8552469  | 3.385040167 | 7.385453579 | 18.16979213 |
| ENSMUSG000000034908 | -0.235900509 | 5.748826034  | 1.025628738 | 0.311187567 | 0.999071534 | Sidt2         | Sidt2         | SIDT2         | 72.21525451 | 81.70168119 | 46.92219358 | 52.31410834 | 48.72490839 | 79.31075606 | 40.51177372 | 49.87753063 | 32.76312918 | 41.96045521 |
| ENSMUSG000000080076 | 1.335508893  | 1.550290985  | 1.025524742 | 0.3112121   | 0.999071534 | Hist1h2aj     | Hist1h2aj     |               | 1.543960738 | 2.075151554 | 0           | 0           | 4.774386997 | 0.727621615 | 14.04321869 | 4.697606763 | 0           | 0           |
| ENSMUSG000000003154 | -0.244886442 | 4.500478862  | 1.025442582 | 0.311231483 | 0.999071534 | Foxj2         | Foxj2         | FOXJ2         | 20.70310989 | 26.56193989 | 28.4764532  | 22.54918463 | 28.51551686 | 28.52276732 | 15.33752455 | 21.07014798 | 14.29949523 | 21.89525311 |
| ENSMUSG000000001472 | -0.254142236 | 7.424585095  | 1.024863793 | 0.311368076 | 0.999071534 | Tcf25         | Tcf25         | TCF25         | 205.9082184 | 249.7889571 | 164.8672196 | 154.9302439 | 197.515736  | 206.2807279 | 156.7404408 | 173.2587906 | 87.60405043 | 148.4955674 |
| ENSMUSG000000005947 | -0.578857722 | 0.807756183  | 1.024524956 | 0.311448076 | 0.999071534 | Itgae         | Itgae         | ITGAE         | 3.579181711 | 0.830060622 | 1.817645949 | 1.595788451 | 2.289089656 | 1.8918162   | 1.29430587  | 0.690824524 | 1.257098482 | 1.176461361 |
| ENSMUSG000000027684 | -0.41667128  | 2.195477503  | 1.024488455 | 0.311456696 | 0.999071534 | Mecom         | Mecom         | MECOM         | 2.737021308 | 5.810424352 | 6.058819831 | 5.550568524 | 6.14784079  | 4.074681045 | 3.106334087 | 3.730452429 | 2.592765618 | 4.967281302 |
| ENSMUSG000000044792 | -0.234352772 | 5.89821984   | 1.024452107 | 0.31146528  | 0.999071534 | Isca1         | Isca1         | ISCA1         | 83.86514008 | 76.72131746 | 51.70192922 | 58.97479057 | 63.63669243 | 72.18006423 | 75.06974044 | 48.70312894 | 32.52742321 | 41.30686557 |
| ENSMUSG000000027552 | 0.265233082  | 4.359752274  | 1.024434654 | 0.311469402 | 0.999071534 | E2f5          | E2f5          | E2F5          | 21.1241901  | 15.3561215  | 22.8215547  | 16.929234   | 20.07858641 | 18.918162   | 31.06334087 | 20.1720761  | 17.75651605 | 18.88874074 |
| ENSMUSG000000022961 | 0.307438578  | 7.963013314  | 1.024429263 | 0.311470674 | 0.999071534 | Son           | Son           | SON           | 186.187629  | 189.550272  | 280.6579986 | 269.7576303 | 225.5734349 | 245.3540087 | 152.0162244 | 259.1973614 | 321.424368  | 318.7556699 |
| ENSMUSG000000085705 | 0.751376784  | 0.132563285  | 1.024295034 | 0.311502377 | 0.999071534 | Gm16046       | Gm16046       |               | 0.140360067 | 0.474320355 | 0.942483085 | 1.457024238 | 0.654025616 | 0.654859454 | 1.035444696 | 0.967154334 | 0.785686551 | 2.352922722 |
| ENSMUSG000000093529 | 1.242131606  | -0.188644074 | 1.02394191  | 0.311585798 | 0.999071534 | Gm25397       | Gm25397       |               | 0           | 0.415030311 | 1.413724627 | 0.069382107 | 0.457817931 | 0           | 0           | 0.828989429 | 1.964216377 | 1.960768935 |
| ENSMUSG000000056899 | 0.380286338  | 3.036229532  | 1.023780095 | 0.311624035 | 0.999071534 | Immp2l        | Immp2l        | IMMP2L        | 6.877643287 | 5.158233863 | 7.472544458 | 8.256470679 | 8.567735569 | 6.112021568 | 7.44225875  | 12.43484143 | 9.978219197 | 6.731973344 |
| ENSMUSG000000030431 | 0.441051374  | 2.630740278  | 1.023531222 | 0.311682855 | 0.999071534 | Tmem238       | Tmem238       | TMEM238       | 7.439083555 | 2.786632087 | 9.222870187 | 3.469105327 | 3.858751134 | 11.64194584 | 9.383717555 | 4.559441858 | 4.16413872  | 5.163358196 |
| ENSMUSG000000048546 | -0.23721158  | 5.423102814  | 1.023214405 | 0.311757755 | 0.999071534 | Tob2          | Tob2          | TOB2          | 40.70441945 | 43.93392291 | 54.79865936 | 46.90230403 | 53.82630819 | 66.72290212 | 29.83375029 | 39.79149258 | 22.54920401 | 37.3853277  |
| ENSMUSG000000019841 | -0.254108501 | 5.200612343  | 1.023152394 | 0.311772418 | 0.999071534 | Rev3l         | Rev3l         | REV3L         | 33.0547958  | 39.07213926 | 49.68232261 | 42.18432078 | 42.51166504 | 30.12353487 | 24.07408917 | 44.90359406 | 21.05639957 | 41.11078867 |
| ENSMUSG000000032965 | -0.252148988 | 4.43331149   | 1.023060545 | 0.311794138 | 0.999071534 | Ift57         | Ift57         | IFT57         | 17.82572852 | 22.17447661 | 26.99540836 | 26.57334681 | 27.27286819 | 21.82864846 | 20.38531745 | 22.79720929 | 13.90665195 | 16.2090232  |
| ENSMUSG000000005763 | -0.720668423 | 0.140340669  | 1.021995292 | 0.312046187 | 0.999071534 | Cd247         | Cd247         | CD247         | 1.543960738 | 1.422961066 | 1.548365068 | 1.110113705 | 0.588623054 | 1.309718907 | 0.906014109 | 0.345412262 | 0.078568655 | 1.045743432 |
| ENSMUSG000000031486 | -0.276906019 | 6.284110216  | 1.021968762 | 0.312052468 | 0.999071534 | Gpr124        | Adgra2        | ADGRA2        | 83.44405988 | 95.81271716 | 76.61041075 | 98.17568077 | 87.57402998 | 153.2371122 | 61.80310527 | 61.48338263 | 38.498641   | 43.98658311 |
| ENSMUSG000000029455 | -0.277982699 | 8.521592025  | 1.021897645 | 0.312069305 | 0.999071534 | Aldh2         | Aldh2         | ALDH2         | 451.0470756 | 452.620199  | 296.2089695 | 326.5815755 | 575.8695549 | 391.6787155 | 386.0267256 | 297.0545453 | 183.143535  | 375.2911742 |
| ENSMUSG000000074183 | 0.722043165  | 0.630924425  | 1.021774123 | 0.312098552 | 0.999071534 | Gsta1         | Gsta1         | GSTA1         | 0.561440268 | 1.600831199 | 1.211763966 | 1.457024238 | 0.719428178 | 0.509335131 | 0.970729402 | 3.523205072 | 2.592765618 | 0.457512752 |
| ENSMUSG000000027502 | -0.227229176 | 5.620299844  | 1.021626206 | 0.312133579 | 0.999071534 | Rtfdc1        | Rtfdc1        | RTFDC1        | 57.19672734 | 75.23906635 | 44.49866565 | 39.13150809 | 60.10495411 | 57.11829679 | 49.89549127 | 48.49588158 | 27.89187256 | 38.49643009 |
| ENSMUSG000000024308 | -0.255896771 | 8.252379058  | 1.021477413 | 0.312168819 | 0.999071534 | Tapbp         | Tapbp         | TAPBP         | 382.832083  | 367.5389853 | 333.1677705 | 328.2467461 | 311.054583  | 367.59444   | 239.1230094 | 246.0716954 | 193.0431856 | 317.3177727 |

|                     |              |              |             |             |             |               |               |              |             |             |             |             |             |             |             |             |             |             |
|---------------------|--------------|--------------|-------------|-------------|-------------|---------------|---------------|--------------|-------------|-------------|-------------|-------------|-------------|-------------|-------------|-------------|-------------|-------------|
| ENSMUSG00000028082  | -0.260024028 | 7.035907763  | 1.021033458 | 0.312273995 | 0.999071534 | Sh3d19        | Sh3d19        | SH3D19       | 119.0955169 | 175.4985314 | 114.1077735 | 169.3617221 | 161.87134   | 147.2706149 | 74.22844162 | 125.9373107 | 113.453138  | 113.7899572 |
| ENSMUSG00000026977  | 0.257522352  | 6.630270376  | 1.020765815 | 0.312337425 | 0.999071534 | 7-Mar         | 7-Mar         | 7-Mar        | 76.21551643 | 102.0381664 | 89.6705335  | 104.6975988 | 93.85267589 | 77.12789121 | 87.04206973 | 147.4219534 | 97.73940694 | 99.34562605 |
| ENSMUSG00000024213  | -0.230938203 | 6.824366035  | 1.020370198 | 0.312431213 | 0.999071534 | Nudt3         | Nudt3         | NUDT3        | 116.2181355 | 105.2991189 | 156.721473  | 123.2226212 | 132.5055898 | 153.3098743 | 83.67687447 | 88.01104435 | 78.5686551  | 108.8226759 |
| ENSMUSG00000022521  | 0.451722742  | 6.268268009  | 1.020213128 | 0.31246846  | 0.999071534 | Crebbp        | Crebbp        | CREBBP       | 35.79181711 | 42.33309171 | 103.6731393 | 94.35966491 | 57.61965677 | 40.45576181 | 24.07408917 | 96.37002109 | 150.5375432 | 86.7313459  |
| ENSMUSG00000020109  | -0.237833207 | 5.411880075  | 1.020186615 | 0.312474748 | 0.999071534 | Dnajb12       | Dnajb12       | DNAI12       | 38.10775821 | 49.56647712 | 41.06533441 | 45.93095454 | 64.09451036 | 46.56778337 | 37.40543963 | 48.56496403 | 20.8206936  | 37.84284045 |
| ENSMUSG00000035042  | -0.39836955  | 3.440094299  | 1.019681597 | 0.312594547 | 0.999071534 | Cc15          | Cc15          | CCL5         | 8.351423991 | 14.2889007  | 20.39802676 | 11.93372233 | 8.044515076 | 8.513172898 | 3.688771728 | 11.81309936 | 7.542590889 | 12.67963911 |
| ENSMUSG00000032479  | -0.267442908 | 7.559299637  | 1.019334829 | 0.312676841 | 0.999071534 | Map4          | Map4          | MAP4         | 180.7135864 | 274.6866459 | 201.7587004 | 207.7994091 | 203.2711614 | 266.1639868 | 111.4397354 | 166.9722874 | 149.201876  | 144.3779526 |
| ENSMUSG00000047123  | -0.345021773 | 3.300941879  | 1.019294321 | 0.312686457 | 0.999071534 | Ticam1        | Ticam1        | TICAM1       | 10.94808523 | 17.43127306 | 7.405224238 | 7.84017804  | 13.14591488 | 8.440410737 | 6.730390522 | 10.36236786 | 6.914041649 | 8.692742279 |
| ENSMUSG00000050323  | 0.402759103  | 2.966735839  | 1.01881715  | 0.312799749 | 0.999071534 | Ndufaf6       | Ndufaf6       | NDUFAF6      | 8.772504193 | 4.98036373  | 6.058819831 | 7.354503294 | 7.194281776 | 8.222124252 | 14.75508691 | 5.802926001 | 3.299883514 | 10.98030604 |
| ENSMUSG00000019971  | 0.297179337  | 3.924777241  | 1.018551251 | 0.312862903 | 0.999071534 | Cep290        | Cep290        | CEP290       | 9.614664595 | 14.2889007  | 17.63789773 | 9.574730704 | 19.29375567 | 19.50025929 | 12.36062105 | 17.89235517 | 14.14235792 | 16.33974113 |
| ENSMUSG00000022528  | 0.308302896  | 6.253001736  | 1.01791548  | 0.313013974 | 0.999071534 | Hes1          | Hes1          | HES1         | 50.59980418 | 65.27833889 | 90.07445482 | 77.77734144 | 67.9532615  | 61.33850216 | 42.25908664 | 95.74827902 | 112.6674514 | 77.25429604 |
| ENSMUSG00000036002  | -0.291277156 | 5.280007989  | 1.01714476  | 0.313197239 | 0.999071534 | Fam214b       | Fam214b       | FAM214B      | 39.79207902 | 45.59404415 | 45.44114873 | 42.32308499 | 48.07088277 | 28.15895651 | 14.94923279 | 51.12101477 | 29.07040239 | 42.15653211 |
| ENSMUSG00000024012  | -0.315661764 | 7.672765353  | 1.01668357  | 0.313306969 | 0.999071534 | Mtch1         | Mtch1         | MTCH1        | 288.720658  | 271.1333731 | 170.8587192 | 184.1401108 | 265.1419847 | 334.9969916 | 238.0228494 | 129.0460211 | 70.8689269  | 152.0903104 |
| ENSMUSG00000023737  | 0.842367273  | 0.191032358  | 1.015925898 | 0.313487351 | 0.999071534 | 1700082M22Rik | 1700082M22Rik |              | 0.631620302 | 0.474320355 | 1.481044848 | 0           | 1.24264867  | 0.582097292 | 0.711868228 | 0.621742072 | 1.885647722 | 2.222204793 |
| ENSMUSG00000020898  | -0.267669868 | 4.598722182  | 1.01563112  | 0.313557566 | 0.999071534 | Ctc1          | Ctc1          | CTC1         | 28.56327365 | 32.72810451 | 24.36991976 | 28.5854279  | 22.23687094 | 39.43709155 | 15.72581632 | 16.85611838 | 14.29949523 | 23.13707343 |
| ENSMUSG00000029328  | 0.238183021  | 7.241824572  | 1.015627022 | 0.313558542 | 0.999071534 | Hnrnpdl       | Hnrnpdl       | HNRNPDL      | 157.5541753 | 137.9679333 | 153.4901024 | 129.1894824 | 143.0354022 | 150.6904365 | 149.4276126 | 187.973353  | 128.0669078 | 169.475795  |
| ENSMUSG00000056427  | 0.836362093  | 1.566314932  | 1.015587853 | 0.313567874 | 0.999071534 | Slit3         | Slit3         | SLIT3        | 4.772242281 | 3.201662398 | 1.279084186 | 0.346910533 | 1.765869163 | 9.968416129 | 8.607134033 | 1.519813953 | 0.15713731  | 0.261435858 |
| ENSMUSG00000040747  | -0.28061187  | 6.154361523  | 1.015051318 | 0.313695733 | 0.999071534 | Cd53          | Cd53          | CD53         | 75.72425619 | 103.2832574 | 73.10975929 | 64.73350541 | 89.4053017  | 72.25282639 | 100.5675661 | 73.50372935 | 25.3776756  | 45.4898393  |
| ENSMUSG00000080774  | 0.766356732  | -0.413780686 | 1.014722133 | 0.313774452 | 0.999071534 | Gm9143        | Gm9143        |              | 0.701800335 | 0.474320355 | 0.269280881 | 0.277528426 | 0.654025616 | 0.9459081   | 1.100159989 | 1.105319238 | 0.235705965 | 0.457512752 |
| ENSMUSG00000017288  | -0.236477587 | 4.861143647  | 1.014259111 | 0.313884645 | 0.999071534 | Vps53         | Vps53         | VP53         | 34.03731627 | 26.38406976 | 40.45945243 | 30.11183424 | 31.45863213 | 34.78031321 | 19.99702569 | 22.31363212 | 20.11357571 | 32.61412329 |
| ENSMUSG00000038880  | 0.266845481  | 4.734494757  | 1.01417015  | 0.313905869 | 0.999071534 | Mrps34        | Mrps34        | MRPS34       | 28.98435385 | 21.58157616 | 26.25488593 | 18.94131509 | 29.6273604  | 30.85115649 | 46.07728896 | 19.27400422 | 20.66355629 | 23.92138101 |
| ENSMUSG00000033047  | -0.284837148 | 7.529426765  | 1.014078134 | 0.313927823 | 0.999071534 | Elf3l         | Elf3l         | EIF3L        | 247.6653384 | 200.1038999 | 209.6351661 | 211.0603681 | 183.650393  | 288.7930191 | 207.1536544 | 91.46516697 | 96.16803384 | 153.3321307 |
| ENSMUSG00000026276  | 0.267134131  | 8.217460759  | 1.014040324 | 0.313936844 | 0.999071534 | 2-Sep         | 2-Sep         | 2-Sep        | 257.6309031 | 277.655278  | 273.1854541 | 284.8135474 | 307.7844549 | 283.4813813 | 427.2503676 | 319.0918476 | 260.2979543 | 268.2331903 |
| ENSMUSG00000064061  | 0.243172807  | 4.284049854  | 1.014030672 | 0.313939147 | 0.999071534 | Dzip3         | Dzip3         | DZIP3        | 16.91338808 | 19.50642461 | 18.58038081 | 18.80255087 | 18.051107   | 21.53759981 | 21.09718567 | 18.8595095  | 19.95643839 | 19.01945867 |
| ENSMUSG00000020032  | 0.294215688  | 3.938875734  | 1.013985    | 0.313950045 | 0.999071534 | Nuak1         | Nuak1         | NUAK1        | 15.57996745 | 13.28096995 | 14.67580803 | 15.26406344 | 11.96866877 | 30.05077271 | 13.46078104 | 10.29328541 | 13.27810271 | 16.27438216 |
| ENSMUSG00000046792  | -0.247053988 | 4.325145384  | 1.013853953 | 0.313981318 | 0.999071534 | Zfp787        | Zfp787        | ZNF787       | 24.0717515  | 18.73565403 | 23.42743668 | 23.93682676 | 21.84445557 | 21.7558863  | 17.47312924 | 21.83005496 | 12.49241616 | 15.16327977 |
| ENSMUSG00000036006  | 0.420445161  | 3.064137208  | 1.013514448 | 0.314062356 | 0.999071534 | Fam65b        | Fam65b        | AL078584.1   | 7.509263589 | 5.691844263 | 9.088229746 | 6.868828548 | 7.39048946  | 5.74821076  | 4.012348196 | 16.16529386 | 6.442629718 | 12.35284429 |
| ENSMUSG00000040618  | -0.225584386 | 5.016392996  | 1.013040265 | 0.314175586 | 0.999071534 | Pck2          | Pck2          | PCK2         | 31.30029496 | 34.50680584 | 45.10454763 | 33.23402904 | 36.102214   | 34.85307537 | 22.65035272 | 32.53783508 | 26.71334273 | 26.47038062 |
| ENSMUSG00000027478  | 0.601463372  | 0.939515621  | 1.013039309 | 0.314175814 | 0.999071534 | Dnmt3b        | Dnmt3b        | DNMT3B       | 1.965040939 | 1.126510844 | 1.346404407 | 1.526406344 | 1.438856355 | 1.819054038 | 0.517722348 | 1.312566595 | 3.221314859 | 3.202589261 |
| ENSMUSG00000025492  | -0.295222372 | 8.301047178  | 1.012524868 | 0.314298718 | 0.999071534 | Ifitm3        | Ifitm3        | IFITM1       | 281.0710343 | 273.8607151 | 456.7003748 | 440.3682303 | 340.6165408 | 287.1194894 | 186.8977676 | 332.9774205 | 211.9782315 | 346.4025119 |
| ENSMUSG000000031845 | 0.841487631  | 0.211977474  | 1.011877114 | 0.31445356  | 0.999071534 | Bco1          | Bco1          | BCO1         | 0.701800335 | 0.711480533 | 1.144443746 | 0.971349492 | 0.327012808 | 0.873145938 | 0.064715293 | 0.414494714 | 2.907040239 | 1.764692042 |
| ENSMUSG000000031399 | -0.254542286 | 4.4258939    | 1.011536349 | 0.314535059 | 0.999071534 | Fam3a         | Fam3a         | FAM3A        | 19.51004932 | 31.66088371 | 19.45554368 | 21.36968882 | 28.90793223 | 22.77455656 | 21.29133155 | 21.7609725  | 12.33527885 | 16.99333077 |
| ENSMUSG000000030752 | -0.498524035 | 1.705822975  | 1.01136004  | 0.314577236 | 0.999071534 | Kdm8          | Kdm8          | KDM8         | 2.666841275 | 2.668051998 | 3.971893    | 6.03624327  | 3.466335765 | 4.001918884 | 3.494625848 | 1.174401691 | 2.514196963 | 1.503256184 |
| ENSMUSG000000045136 | -0.230071612 | 6.307813701  | 1.011322865 | 0.31458613  | 0.999071534 | Tubb2b        | Tubb2b        | TU8B2B       | 82.60189948 | 76.00983693 | 107.375514  | 83.18914575 | 93.91807845 | 69.70615074 | 57.46718061 | 96.16277373 | 59.16219729 | 66.33934897 |
| ENSMUSG00000025950  | 0.250676349  | 6.518382369  | 1.010964854 | 0.314671801 | 0.999071534 | Idh1          | Idh1          | IDH1         | 90.11116307 | 54.96187117 | 72.43655709 | 110.1094031 | 104.7749037 | 93.06280459 | 100.0498437 | 85.24774625 | 100.3321726 | 94.44370371 |
| ENSMUSG00000020023  | 0.222818497  | 5.431759774  | 1.010893551 | 0.314688867 | 0.999071534 | Tmcc3         | Tmcc3         | TMCC3        | 46.95044244 | 44.88256362 | 36.28559876 | 39.96409337 | 38.12969341 | 58.64630219 | 35.26983495 | 36.75186467 | 48.24115423 | 44.11730104 |
| ENSMUSG00000078771  | 0.239851934  | 5.218631191  | 1.010818913 | 0.314706733 | 0.999071534 | Evi2a         | Evi2a         | CTD-2370N5.3 | 39.23063875 | 38.36065873 | 30.83266092 | 32.54020797 | 35.97140888 | 43.8755834  | 61.93253586 | 29.91270189 | 27.8133039  | 32.28732847 |
| ENSMUSG000000064120 | -0.322398859 | 3.635202287  | 1.010807345 | 0.314709502 | 0.999071534 | Mocs1         | Mocs1         | MOCS1        | 14.45708691 | 16.77908257 | 18.31109993 | 6.799446442 | 15.04258917 | 12.2968053  | 8.542418739 | 13.81649048 | 8.642552061 | 9.477049853 |
| ENSMUSG000000006464 | -0.559483651 | 1.178652898  | 1.010789286 | 0.314713825 | 0.999071534 | Bbs1          | Bbs1          | BBS1         | 1.754500839 | 1.660121243 | 4.173853661 | 2.775284262 | 2.746907587 | 1.600767553 | 0.711868228 | 2.625133191 | 0.785686551 | 2.61435858  |

|                      |              |              |             |             |             |                |                |            |             |             |             |             |             |             |             |             |             |             |
|----------------------|--------------|--------------|-------------|-------------|-------------|----------------|----------------|------------|-------------|-------------|-------------|-------------|-------------|-------------|-------------|-------------|-------------|-------------|
| ENSMUSG00000032741   | -0.240956485 | 4.875382074  | 1.010640394 | 0.314749469 | 0.999071534 | Tpcn1          | Tpcn1          | TPCN1      | 34.7391166  | 26.73981003 | 33.45814951 | 32.74835429 | 36.69083706 | 41.9837672  | 20.25588686 | 24.24794079 | 15.63516236 | 31.1108671  |
| ENSMUSG00000024942   | -0.223796593 | 6.78532862   | 1.010616754 | 0.314755129 | 0.999071534 | Capn1          | Capn1          | CAPN1      | 120.9201978 | 147.4543404 | 122.522801  | 105.1832735 | 121.2563492 | 148.5803338 | 77.46420629 | 100.0313911 | 73.93310445 | 99.99921569 |
| ENSMUSG000000074340  | 0.452191998  | 3.423478223  | 1.009579604 | 0.315003574 | 0.999071534 | Ovgp1          | Ovgp1          | OVGP1      | 10.17610486 | 6.759065062 | 13.53136429 | 9.297202278 | 6.605658721 | 5.529924276 | 4.335924663 | 12.78025369 | 19.72073243 | 12.94107497 |
| ENSMUSG000000070420  | -0.551731438 | 1.840574843  | 1.009363903 | 0.315055276 | 0.999071534 | Zscan25        | Zscan25        | ZSCAN25    | 5.263502516 | 6.877645151 | 2.625488593 | 2.497755836 | 4.120361381 | 7.785551283 | 2.135604685 | 2.763298096 | 0.785686551 | 1.176461361 |
| ENSMUSG00000019863   | 0.408719023  | 3.148351622  | 1.008548256 | 0.315250883 | 0.999071534 | Qrs1l          | Qrs1l          | QRSL1      | 12.98330621 | 7.233385418 | 5.116336746 | 3.81601586  | 10.26820217 | 14.04309717 | 15.40223985 | 4.90485412  | 6.364061063 | 8.627383315 |
| ENSMUSG00000026812   | 0.346006422  | 4.044707655  | 1.008376944 | 0.315291987 | 0.999071534 | Tsc1           | Tsc1           | TSC1       | 12.63240604 | 20.81080559 | 11.915679   | 12.48877918 | 17.2008737  | 17.68120525 | 6.795105815 | 28.04747567 | 14.6923385  | 20.52271485 |
| ENSMUSG00000020099   | -0.274105408 | 5.737076106  | 1.008187659 | 0.315337412 | 0.999071534 | Unc5b          | Unc5b          | UNC5B      | 63.44275032 | 88.75719648 | 66.8489788  | 43.84949134 | 40.28797794 | 93.13556675 | 36.7582867  | 36.89002958 | 28.04900987 | 48.4309927  |
| ENSMUSG000000070576  | -0.385322466 | 3.555676132  | 1.008098899 | 0.315358715 | 0.999071534 | Mn1            | Mn1            | MN1        | 7.509263589 | 11.26510844 | 16.02221244 | 16.23541293 | 17.00466601 | 15.4983404  | 3.17104938  | 11.4676871  | 8.01400282  | 11.30710086 |
| ENSMUSG000000004360  | 0.954269893  | -0.761389986 | 1.007987164 | 0.315385535 | 0.999071534 | 9330159F19Rik  | 9330159F19Rik  | KIAA0408   | 0.350900168 | 0.237160178 | 0.269280881 | 0.277528426 | 0.523220493 | 0.218286485 | 0.064715293 | 0.207247357 | 1.257098482 | 1.045743432 |
| ENSMUSG000000033751  | 0.270752216  | 5.323172972  | 1.007947862 | 0.31539497  | 0.999071534 | Gadd45gip1     | Gadd45gip1     | GADD45GIP1 | 36.70415754 | 23.77530781 | 50.82676636 | 38.99274388 | 36.9524473  | 34.05269159 | 35.65812671 | 35.09388582 | 51.14819447 | 48.62706959 |
| ENSMUSG000000030417  | 0.30154105   | 6.364484627  | 1.007568839 | 0.315485975 | 0.999071534 | Pdcd5          | Pdcd5          | PDCD5      | 62.81113002 | 50.81156806 | 103.8077798 | 98.93888394 | 63.1788745  | 56.82724815 | 73.32242751 | 89.59994075 | 113.6888439 | 87.18885865 |
| ENSMUSG000000004394  | -0.205189936 | 5.986663254  | 1.007110183 | 0.315596146 | 0.999071534 | Tmed4          | Tmed4          | TMED4      | 65.26743119 | 72.98604467 | 71.02283246 | 69.52087076 | 72.85845362 | 59.73773461 | 66.33317582 | 63.48677375 | 41.95566182 | 52.94076125 |
| ENSMUSG000000040312  | 0.235459035  | 5.281870535  | 1.006964632 | 0.315631119 | 0.999071534 | Cchcr1         | Cchcr1         | CCHCR1     | 37.12523774 | 32.19449411 | 45.97971049 | 29.20986686 | 40.81119844 | 47.6592158  | 26.01554798 | 40.3441522  | 38.18436638 | 49.60745406 |
| ENSMUSG000000087627  | 0.481901599  | 3.866538694  | 1.006845012 | 0.315659865 | 0.999071534 | A230059L01Rik  | A230059L01Rik  |            | 8.772504193 | 4.802493597 | 19.72482456 | 19.98204669 | 8.502333007 | 6.184783729 | 8.348272859 | 19.61941648 | 27.10618601 | 14.44433116 |
| ENSMUSG000000031144  | -0.621298695 | 0.225547991  | 1.006668763 | 0.315702225 | 0.999071534 | Syp            | Syp            | SYP        | 1.754500839 | 0.711480533 | 1.279084186 | 1.457024238 | 1.308051232 | 0.873145938 | 0.647152935 | 0.967154334 | 0.707117896 | 0.71894861  |
| ENSMUSG000000070604  | -0.675375935 | 0.871709526  | 1.00603028  | 0.315855743 | 0.999071534 | Vsig10l        | Vsig10l        | VSIG10L    | 1.965040939 | 2.193731643 | 3.029409915 | 1.526406344 | 2.092881971 | 1.528005392 | 0.647152935 | 2.141556024 | 0           | 2.156845829 |
| ENSMUSG000000078894  | 0.563298555  | 0.932293717  | 1.005964345 | 0.315871602 | 0.999071534 | 2210418O10Rik  | 2210418O10Rik  | ZNF781     | 1.473780704 | 2.668051998 | 0.740522424 | 0.832558279 | 1.765869163 | 1.819054038 | 2.394465859 | 1.174401691 | 1.728510412 | 3.071871332 |
| ENSMUSG0000000024900 | -0.262564057 | 6.220417714  | 1.005577199 | 0.315964742 | 0.999071534 | Cpt1a          | Cpt1a          | CPT1A      | 62.46022985 | 115.0819762 | 68.93590563 | 79.09560147 | 96.27257067 | 66.43185347 | 42.77680899 | 93.53764054 | 45.88409458 | 78.03860362 |
| ENSMUSG000000022614  | -0.215175542 | 6.370617978  | 1.005142184 | 0.316069441 | 0.999071534 | Lmf2           | Lmf2           | LMF2       | 90.3918832  | 93.50040003 | 95.79667355 | 85.61751948 | 95.81475274 | 124.2050097 | 69.69837108 | 62.65778432 | 49.18397809 | 74.83601436 |
| ENSMUSG000000015652  | 0.244427026  | 6.092622464  | 1.004777632 | 0.316157216 | 0.999071534 | Steap1         | Steap1         | STEAP1     | 82.46153941 | 51.34517846 | 71.96531555 | 67.30064335 | 50.09836218 | 71.45244261 | 104.4504837 | 52.84807608 | 56.96227495 | 71.11055338 |
| ENSMUSG000000055407  | -0.285399948 | 4.194169113  | 1.004688261 | 0.316178739 | 0.999071534 | Map6           | Map6           | MAP6       | 18.03626862 | 31.66088371 | 18.31109993 | 14.01518552 | 22.10606582 | 19.35473496 | 14.43151045 | 21.7609725  | 10.52819978 | 13.79074151 |
| ENSMUSG000000031257  | 0.984215139  | -0.416808763 | 1.004630766 | 0.316192587 | 0.999071534 | Nox1           | Nox1           | NOX1       | 0.350900168 | 0           | 0.740522424 | 0.277528426 | 0.784830739 | 1.236956746 | 0.064715293 | 2.003391119 | 0.31427462  | 0.457512752 |
| ENSMUSG000000020415  | -0.300025666 | 5.763196908  | 1.003956551 | 0.316355029 | 0.999071534 | Pttg1          | Pttg1          | PTTG2      | 62.95149009 | 24.4274983  | 92.76726363 | 74.30823611 | 54.08791844 | 64.61279943 | 52.6135336  | 30.11994924 | 33.54881573 | 57.97340152 |
| ENSMUSG000000031841  | -0.359953442 | 3.688220079  | 1.003842779 | 0.316382451 | 0.999071534 | Cdh13          | Cdh13          | CDH13      | 8.772504193 | 25.07968878 | 16.08953266 | 14.15394974 | 10.13739705 | 10.25946477 | 6.989251696 | 17.06336574 | 8.32827744  | 10.91494707 |
| ENSMUSG000000018169  | -0.40415939  | 3.088592666  | 1.003527453 | 0.31645847  | 0.999071534 | Mfng           | Mfng           | MFNG       | 12.562226   | 9.189956883 | 10.29999371 | 9.782877023 | 7.652099707 | 13.97033501 | 10.35444696 | 2.625133191 | 3.8498641   | 5.751588876 |
| ENSMUSG000000071302  | 0.256939729  | 4.337858701  | 1.003446199 | 0.316478063 | 0.999071534 | 2610044O15Rik8 | 2610044O15Rik8 | ZNF69      | 19.29950922 | 17.4905631  | 16.15685288 | 22.54918463 | 19.22835311 | 21.39207549 | 24.00937388 | 15.19813953 | 21.37067419 | 22.61420172 |
| ENSMUSG000000038563  | -0.259167136 | 4.090295185  | 1.003038515 | 0.316576391 | 0.999071534 | Eftud1         | Eft1l          | EFL1       | 15.50978741 | 19.32855448 | 22.41763337 | 16.30479504 | 22.17146838 | 22.19245926 | 14.62565633 | 13.54016067 | 10.13535651 | 15.42471562 |
| ENSMUSG000000042138  | 0.371548188  | 3.368757401  | 1.003033464 | 0.31657761  | 0.999071534 | Msantd2        | Msantd2        | MSANTD2    | 7.228543455 | 7.589125684 | 10.16535327 | 12.76630761 | 8.044515076 | 7.785551283 | 6.536244641 | 16.51070612 | 9.192532646 | 14.50969012 |
| ENSMUSG000000032826  | 0.606839165  | 1.166522851  | 1.002987207 | 0.316588769 | 0.999071534 | Ank2           | Ank2           | ANK2       | 1.824680872 | 0.5336104   | 2.086926831 | 2.844666369 | 1.373453794 | 1.673529715 | 1.617882337 | 1.243484143 | 4.556981996 | 2.61435858  |
| ENSMUSG000000087338  | 1.259475348  | -0.401711954 | 1.002710352 | 0.31665557  | 0.999071534 | 4930405P13Rik  | Sccep1os       |            | 1.122880537 | 0           | 0.875162864 | 0           | 0           | 0.145524323 | 0.064715293 | 0.967154334 | 1.807079067 | 1.045743432 |
| ENSMUSG000000033295  | 0.49139635   | 1.916434097  | 1.002428315 | 0.316723639 | 0.999071534 | Ptprf          | Ptprf          | PTPRF      | 2.737021308 | 3.438822576 | 2.288887492 | 4.02416218  | 3.139322957 | 8.14936209  | 4.788931717 | 4.214029596 | 0.785686551 | 3.856178906 |
| ENSMUSG000000020070  | 0.28029602   | 4.38004231   | 1.002178445 | 0.316783962 | 0.999071534 | Rufy2          | Rufy2          | RUFY2      | 16.49230788 | 22.47092683 | 13.53136429 | 18.80255087 | 25.83401183 | 18.99092416 | 17.14955277 | 28.7383002  | 22.47063536 | 19.9984314  |
| ENSMUSG000000026037  | 0.334137717  | 5.227295162  | 1.002066404 | 0.316811015 | 0.999071534 | Orc2           | Orc2           | ORC2       | 51.37178455 | 31.30514345 | 27.06272858 | 28.86295632 | 33.5515141  | 66.14080482 | 76.88176865 | 18.65226215 | 22.3920667  | 24.83640651 |
| ENSMUSG000000061559  | 0.287831531  | 5.116651534  | 1.001907837 | 0.316849307 | 0.999071534 | Wdr61          | Wdr61          | WDR61      | 38.10775821 | 40.3172302  | 27.39932968 | 26.57334681 | 29.69276296 | 36.67212941 | 69.4395099  | 28.7383002  | 27.10618601 | 22.22204793 |
| ENSMUSG000000097027  | 0.721480643  | 0.612659788  | 1.001494848 | 0.316949069 | 0.999071534 | Gm26559        | Gm26559        |            | 0.070180034 | 0.711480533 | 0.605881983 | 2.497755836 | 1.504258917 | 1.091432423 | 1.164875283 | 1.796143762 | 1.649941757 | 2.548999616 |
| ENSMUSG000000049969  | -0.281437338 | 3.97907077   | 1.001305525 | 0.316994815 | 0.999071534 | Plekhf2        | Plekhf2        | PLEKHf2    | 15.08870721 | 22.70808701 | 14.54116759 | 19.0800793  | 17.46248395 | 19.20921064 | 10.16030108 | 15.05997462 | 12.72812213 | 11.37245982 |
| ENSMUSG000000024371  | -0.577376896 | 1.637776419  | 1.001093735 | 0.317046001 | 0.999071534 | C2             | C2             | C2         | 4.982782381 | 2.134441599 | 4.241173882 | 3.260959008 | 3.924153696 | 4.947826984 | 2.394465859 | 0.207247357 | 2.514196963 | 1.830051006 |
| ENSMUSG000000037347  | -0.532112338 | 2.084792117  | 1.001077981 | 0.317049809 | 0.999071534 | Chst7          | Chst7          | CHST7      | 8.281243958 | 7.233385418 | 2.423527932 | 4.02416218  | 3.335530641 | 7.203453991 | 5.500799946 | 1.381649048 | 1.257098482 | 1.895409971 |
| ENSMUSG000000046985  | 0.243980661  | 4.879325709  | 1.001072259 | 0.317051192 | 0.999071534 | Tapt1          | Tapt1          | TAPT1      | 34.3180364  | 30.53437287 | 23.1581558  | 22.13289199 | 29.75816553 | 35.3624105  | 45.30070544 | 26.94215643 | 18.30649664 | 29.80368781 |

|                     |              |              |             |             |             |               |               |          |              |             |             |             |             |             |             |             |             |             |
|---------------------|--------------|--------------|-------------|-------------|-------------|---------------|---------------|----------|--------------|-------------|-------------|-------------|-------------|-------------|-------------|-------------|-------------|-------------|
| ENSMUSG00000042492  | -0.303311933 | 5.364890789  | 1.000147595 | 0.317274797 | 0.999071534 | Tbc1d10b      | Tbc1d10b      | TBC1D10B | 59.93374864  | 61.24661587 | 33.12154841 | 32.74835429 | 50.09836218 | 77.92827499 | 37.59958551 | 27.01123889 | 13.8280833  | 32.61412329 |
| ENSMUSG00000026974  | 0.275510167  | 4.61039734   | 0.998804093 | 0.317600055 | 0.999071534 | Zmynd19       | Zmynd19       | ZMYND19  | 26.80877281  | 17.07553279 | 26.72612748 | 17.06799821 | 26.94585538 | 41.69271855 | 36.04641847 | 17.61602536 | 16.02800564 | 21.24166346 |
| ENSMUSG00000070692  | 0.391476686  | 3.190345625  | 0.998757655 | 0.317611306 | 0.999071534 | Rps12-ps10    | Rps12-ps10    |          | 10.38664496  | 6.46261484  | 10.70391503 | 5.61995063  | 7.39048946  | 5.602686437 | 17.47312924 | 7.737234668 | 9.349669957 | 8.039152634 |
| ENSMUSG00000038587  | -0.320167265 | 6.019863077  | 0.99823592  | 0.317737741 | 0.999071534 | Akap12        | Akap12        | AKAP12   | 54.52988606  | 77.49208804 | 131.9476319 | 50.99584831 | 58.60069519 | 85.13172898 | 49.05419246 | 79.72115006 | 19.64216377 | 54.77081226 |
| ENSMUSG00000025509  | -0.26590977  | 4.612811877  | 0.998143922 | 0.317760042 | 0.999071534 | Pnp1a2        | Pnp1a2        | PNPLA2   | 26.73859278  | 29.88218238 | 21.60979073 | 25.4632331  | 34.59795508 | 33.61611862 | 17.66727512 | 23.76436362 | 9.978219197 | 25.29391926 |
| ENSMUSG00000001521  | -0.222223612 | 5.050798461  | 0.997954645 | 0.317805931 | 0.999071534 | Tulp3         | Tulp3         | TULP3    | 36.21289731  | 45.23830388 | 32.98690797 | 31.70762269 | 38.84912159 | 48.75064822 | 26.33912445 | 27.77114586 | 21.05639957 | 27.12397027 |
| ENSMUSG00000026565  | 0.289627282  | 3.841561801  | 0.997555469 | 0.317902737 | 0.999071534 | Pou2f1        | Pou2f1        | POU2F1   | 12.42186594  | 12.62877946 | 14.06992605 | 11.51742969 | 15.82741991 | 17.46291877 | 9.513148141 | 13.67832557 | 15.08518178 | 19.28089453 |
| ENSMUSG00000024369  | -0.206115055 | 5.599368008  | 0.997100246 | 0.318013182 | 0.999071534 | Nelfe         | Nelfe         | NELFE    | 62.53040989  | 46.95771517 | 56.27970421 | 46.83292192 | 56.90022859 | 56.97277247 | 42.25908664 | 38.68617334 | 28.83469642 | 53.65970986 |
| ENSMUSG00000007603  | 0.252601112  | 4.61923005   | 0.997045565 | 0.318026452 | 0.999071534 | Dus3l         | Dus3l         | DUS3L    | 27.15967298  | 19.50642461 | 24.10063888 | 17.13738032 | 28.45011429 | 25.03018356 | 19.54401863 | 25.9750021  | 24.59198905 | 31.76445675 |
| ENSMUSG00000098098  | 0.369265888  | 2.995073161  | 0.996937825 | 0.318052601 | 0.999071534 | Gm20748       | Bvht          |          | 10.456825    | 6.04758453  | 5.99149961  | 6.452535909 | 6.671061283 | 5.820972922 | 10.74273872 | 7.115492597 | 6.521198373 | 12.02604947 |
| ENSMUSG00000029246  | 0.278477966  | 4.936908217  | 0.996844481 | 0.318075258 | 0.999071534 | Ppat          | Ppat          | PPAT     | 25.54553221  | 20.92938568 | 27.803251   | 34.69105327 | 33.61691666 | 59.44668596 | 34.88154319 | 17.2706131  | 29.77752028 | 24.3135348  |
| ENSMUSG00000067344  | 0.29767012   | 7.70614683   | 0.996762908 | 0.318095059 | 0.999071534 | Rps25-ps1     | Rps25-ps1     |          | 195.8724736  | 145.557059  | 204.0475879 | 255.881209  | 164.1604296 | 136.1380042 | 222.2323178 | 252.0127863 | 232.9560624 | 234.1811698 |
| ENSMUSG00000021998  | -0.360434468 | 7.168860914  | 0.996586933 | 0.318137782 | 0.999071534 | Lcp1          | Lcp1          | LCP1     | 219.593325   | 252.8127494 | 121.0417562 | 103.8650135 | 147.8751918 | 272.2032463 | 166.5124501 | 80.13564478 | 41.87709317 | 89.86857619 |
| ENSMUSG00000052951  | -0.502355176 | 1.82254969   | 0.996555085 | 0.318145515 | 0.999071534 | C130021 20Rik | C130021 20Rik |          | 3.859901845  | 7.114805329 | 5.722218729 | 1.318260024 | 2.812310149 | 3.783632399 | 2.459181152 | 1.657978857 | 3.064177549 | 2.61435858  |
| ENSMUSG00000027198  | -0.233921176 | 6.197877142  | 0.996363283 | 0.31819209  | 0.999071534 | Ext2          | Ext2          | EXT2     | 90.67260334  | 93.14465976 | 69.20518651 | 74.79391086 | 84.17309677 | 102.4491234 | 89.307105   | 51.05193232 | 40.22715141 | 52.02573575 |
| ENSMUSG00000027670  | 0.710289183  | 2.690019956  | 0.996262277 | 0.318216621 | 0.999071534 | Ocstamp       | Ocstamp       | OCSTAMP  | 15.79050755  | 1.837991377 | 2.558168373 | 1.387642131 | 3.727946011 | 9.531843159 | 23.68579741 | 1.796143762 | 1.807079067 | 2.679717545 |
| ENSMUSG00000054814  | 0.322643113  | 4.546843257  | 0.995845266 | 0.318317925 | 0.999071534 | Usp46         | Usp46         | USP46    | 26.38769261  | 26.73981003 | 13.66600473 | 17.34552664 | 23.61032474 | 40.23747532 | 43.42396192 | 15.47446934 | 12.02100423 | 18.56194592 |
| ENSMUSG00000026594  | -0.357184482 | 2.985491307  | 0.995193876 | 0.318476251 | 0.999071534 | Ralgsps2      | Ralgsps2      | RALGPS2  | 8.351423991  | 6.04758453  | 13.73332495 | 9.574730704 | 7.521294584 | 9.240794513 | 7.895265804 | 5.595678644 | 4.714119306 | 6.078383699 |
| ENSMUSG00000057098  | 0.476855222  | 2.473077844  | 0.994869314 | 0.318555177 | 0.999071534 | Ebf1          | Ebf1          | EBF1     | 3.017741442  | 3.142372354 | 9.088229746 | 4.717983245 | 3.466335765 | 6.184783729 | 3.17104938  | 3.45412262  | 9.192532646 | 7.516280918 |
| ENSMUSG00000026683  | 0.362102098  | 4.913895416  | 0.994760292 | 0.318581694 | 0.999071534 | Nuf2          | Nuf2          | NUF2     | 32.07227533  | 18.14275359 | 24.97580175 | 26.78149313 | 34.59795508 | 48.38683741 | 71.70454518 | 15.47446934 | 14.84947581 | 18.88874074 |
| ENSMUSG00000021508  | 0.454687971  | 4.47150694   | 0.994336669 | 0.31868476  | 0.999071534 | Cxcl14        | Cxcl14        | CXCL14   | 33.475876    | 10.0200175  | 28.40913298 | 10.33793388 | 14.97718661 | 64.1034643  | 34.88154319 | 12.43484143 | 5.656943167 | 17.1240487  |
| ENSMUSG00000057924  | 1.018155812  | 0.030689853  | 0.993568887 | 0.318871669 | 0.999071534 | Gm10033       | Gm10033       | ZNF781   | 0            | 1.185800888 | 0           | 1.248877918 | 0.523220493 | 1.45524323  | 2.135604685 | 0.138164905 | 0.31427462  | 1.895409971 |
| ENSMUSG000000015474 | -0.253283888 | 5.134778616  | 0.993301733 | 0.318936739 | 0.999071534 | Ppt2          | Ppt2          | PPT2     | 36.84451761  | 61.30590592 | 30.56338004 | 26.4345826  | 43.62350858 | 38.27289696 | 42.19437135 | 27.08032134 | 20.97783091 | 27.84291888 |
| ENSMUSG00000000889  | -0.910167774 | 0.004496074  | 0.993224351 | 0.31895559  | 0.999071534 | Dbh           | Dbh           | DBH      | 1.403600671  | 0.415030311 | 2.558168373 | 1.179495811 | 0.327012808 | 1.382481069 | 0.19414588  | 0.345412262 | 1.021392516 | 0           |
| ENSMUSG00000022226  | -1.004551386 | 3.205575643  | 0.993094576 | 0.318987208 | 0.999071534 | Mcpt2         | Mcpt2         |          | 47.65224277  | 8.537766395 | 1.009803305 | 4.509836926 | 2.289089656 | 22.41074575 | 9.448432848 | 0           | 0.628549241 | 0.915025503 |
| ENSMUSG000000021109 | -0.242564719 | 7.436610014  | 0.99307074  | 0.318993015 | 0.999071534 | Hif1a         | Hif1a         | HIF1A    | 172.57272025 | 251.5083684 | 167.6946689 | 185.6665171 | 197.0579181 | 200.6780415 | 174.6018618 | 157.9915686 | 108.896156  | 134.1819541 |
| ENSMUSG00000097777  | -0.885405588 | -0.309430465 | 0.992978723 | 0.319015437 | 0.999071534 | Gm16794       | Gm16794       |          | 1.19306057   | 0.474320355 | 0.807842644 | 1.665170557 | 0.327012808 | 0.436572969 | 0.129430587 | 0.759906976 | 0           | 0.980384468 |
| ENSMUSG000000016940 | -0.248129968 | 4.752575153  | 0.992973909 | 0.31901661  | 0.999071534 | Kctd2         | Kctd2         | KCTD2    | 34.87947667  | 26.38406976 | 28.61109365 | 37.32757332 | 23.28331193 | 32.81573485 | 20.32060215 | 17.13244819 | 21.05639957 | 28.1697137  |
| ENSMUSG000000024188 | 0.20651847   | 6.238613799  | 0.992920165 | 0.319029707 | 0.999071534 | Luc7l         | Luc7l         | LUC7L    | 75.79443623  | 60.89087561 | 84.89079785 | 62.16636747 | 80.24894308 | 84.3313452  | 78.11135923 | 80.34289213 | 63.1691987  | 84.05162835 |
| ENSMUSG000000094483 | 0.273340656  | 7.392145999  | 0.992792788 | 0.319060749 | 0.999071534 | Purb          | Purb          | PURB     | 122.4641585  | 149.7073621 | 190.7181842 | 153.681366  | 171.5509191 | 202.5698577 | 116.8111047 | 165.5906384 | 220.9350581 | 163.6588471 |
| ENSMUSG000000034889 | 0.240242403  | 5.43597818   | 0.992765336 | 0.31906744  | 0.999071534 | Cactin        | Cactin        | CACTIN   | 40.49387935  | 43.63747268 | 41.73853661 | 29.55677739 | 51.01399804 | 69.99719938 | 27.05099267 | 42.76203803 | 35.27732614 | 54.90153018 |
| ENSMUSG000000023236 | 0.372755239  | 2.618723695  | 0.99263324  | 0.319099638 | 0.999071534 | Scg5          | Scg5          | SCG5     | 5.333682549  | 6.106874574 | 5.520258068 | 4.648601139 | 5.624620297 | 6.330308052 | 10.93688846 | 5.388431287 | 4.478413341 | 5.751588876 |
| ENSMUSG000000002012 | -0.83050474  | 0.300167225  | 0.992588886 | 0.319111045 | 0.999071534 | Pnck          | Pnck          | PNCK     | 1.122880537  | 1.541541155 | 1.346404407 | 2.428373729 | 0.719428178 | 2.619437815 | 0.582437641 | 0.828989429 | 0.15713731  | 0           |
| ENSMUSG000000024290 | 0.344306848  | 6.744718389  | 0.990713875 | 0.31956796  | 0.999071534 | Rock1         | Rock1         | ROCK1    | 49.89800385  | 86.44488475 | 153.6247428 | 89.22538902 | 109.8763035 | 86.73249653 | 52.87239477 | 129.6677631 | 152.8946028 | 133.3976466 |
| ENSMUSG000000505030 | -0.305746878 | 3.696630496  | 0.990280712 | 0.319673776 | 0.999071534 | Fam171a1      | Fam171a1      | FAM171A1 | 15.01852718  | 14.64464097 | 17.57057751 | 14.70900659 | 11.5762534  | 19.50025929 | 13.78435751 | 7.944482025 | 8.17114013  | 7.712357812 |
| ENSMUSG000000000440 | -0.860906809 | -0.291059689 | 0.990143053 | 0.319707414 | 0.999071534 | Pparg         | Pparg         | PPARG    | 0.210540101  | 0.770770577 | 1.009803305 | 1.942698983 | 0.523220493 | 0.9459081   | 0.711868228 | 0.345412262 | 0           | 0.457512752 |
| ENSMUSG00000029462  | 0.264503702  | 6.720009202  | 0.989914171 | 0.319763353 | 0.999071534 | Vps29         | Vps29         | VPS29    | 118.4638966  | 87.21565532 | 80.58230375 | 101.8529324 | 108.7644599 | 80.25666416 | 181.4616829 | 113.5024693 | 77.07585065 | 99.01883122 |
| ENSMUSG000000050989 | -0.203041161 | 5.661382806  | 0.989704735 | 0.319814551 | 0.999071534 | Sepn1         | Sepn1         | SEPN1    | 56.35456693  | 72.80817453 | 53.25029429 | 47.59612509 | 50.94859548 | 60.10154542 | 46.91858777 | 46.00891329 | 35.27732614 | 40.78399385 |
| ENSMUSG000000034473 | 0.344618346  | 3.576180015  | 0.989262347 | 0.31992273  | 0.999071534 | Sec22a        | Sec22a        | SEC22A   | 13.54474647  | 12.39161928 | 8.482347763 | 9.297202278 | 10.39900729 | 13.46099988 | 24.46238094 | 10.43145031 | 7.85686551  | 8.235229528 |

|                     |              |              |             |             |             |               |          |          |             |             |             |             |             |             |             |             |             |             |
|---------------------|--------------|--------------|-------------|-------------|-------------|---------------|----------|----------|-------------|-------------|-------------|-------------|-------------|-------------|-------------|-------------|-------------|-------------|
| ENSMUSG00000026516  | 0.235892869  | 4.969406897  | 0.988651142 | 0.320072271 | 0.999071534 | Nvl           | Nvl      | NVL      | 25.26481208 | 34.86254611 | 32.51566643 | 19.49637194 | 37.34486267 | 43.07519962 | 26.92156209 | 27.84022831 | 31.82030531 | 33.59450776 |
| ENSMUSG000000024173 | -0.531273922 | 3.576933106  | 0.988628427 | 0.32007783  | 0.999071534 | Tpsab1        | Tpsab1   | TPSD1    | 33.2653359  | 13.2216799  | 9.357510628 | 7.63203172  | 9.679579116 | 32.16087539 | 5.112508185 | 2.625133191 | 6.364061063 | 4.901922338 |
| ENSMUSG000000032077 | -0.356385362 | 2.908763122  | 0.987812257 | 0.320277667 | 0.999071534 | Bud13         | Bud13    | BUD13    | 9.404124495 | 8.774926572 | 6.530061373 | 9.297202278 | 8.960150939 | 12.00575665 | 6.018522294 | 5.457513739 | 4.32127603  | 4.575127515 |
| ENSMUSG000000024754 | -0.271262574 | 4.813290864  | 0.98751821  | 0.320349703 | 0.999071534 | Tmem2         | Tmem2    | TMEM2    | 30.17741442 | 44.40824326 | 28.94769475 | 27.96098894 | 27.59988099 | 44.53044285 | 31.06334087 | 15.47446934 | 13.8280833  | 22.74491965 |
| ENSMUSG000000020781 | 0.293599569  | 3.805751728  | 0.987463213 | 0.320363179 | 0.999071534 | Tsen54        | Tsen54   | TSEN54   | 18.38716879 | 12.39161928 | 10.50195437 | 9.64411281  | 14.06155074 | 17.53568093 | 15.66110102 | 9.878790692 | 12.2567102  | 18.75802281 |
| ENSMUSG000000024644 | -0.249581136 | 6.40783157   | 0.987415035 | 0.320374984 | 0.999071534 | Cndp2         | Cndp2    | CNDP2    | 122.3237985 | 102.0974565 | 90.0071346  | 86.31134055 | 78.02525598 | 149.8172906 | 72.22226752 | 53.81523041 | 48.00544826 | 66.99293862 |
| ENSMUSG000000024081 | 0.222251018  | 6.17762644   | 0.987395914 | 0.32037967  | 0.999071534 | Cebpz         | Cebpz    | CEBPZ    | 65.47797129 | 58.69714396 | 79.63982066 | 72.43491924 | 69.26131273 | 85.42277763 | 70.79853107 | 56.37128115 | 81.78996696 | 77.58109087 |
| ENSMUSG000000030045 | 0.245109589  | 5.561726979  | 0.986470422 | 0.320606567 | 0.999071534 | Mrp119        | Mrp119   | MIRPL19  | 43.16072063 | 31.66088371 | 55.74114244 | 48.22056405 | 44.34293676 | 41.91100504 | 50.41321362 | 36.19920505 | 54.05523471 | 59.01914495 |
| ENSMUSG000000014782 | 0.419088693  | 2.504607149  | 0.985729109 | 0.320788463 | 0.999071534 | Plekhh4       | Plekhh4  | PLEKHG4  | 5.403862583 | 3.972432975 | 5.85685917  | 4.509836926 | 4.90519212  | 5.23887563  | 2.653327033 | 5.526596192 | 7.621159544 | 8.758101244 |
| ENSMUSG000000035770 | -0.261466564 | 6.018882771  | 0.985475122 | 0.320850815 | 0.999071534 | Dync11l2      | Dync11l2 | DYNCL1I2 | 75.09263589 | 107.7893007 | 58.83787258 | 57.10147369 | 68.86889736 | 106.8148531 | 66.98032875 | 45.11084141 | 30.40606952 | 47.84276202 |
| ENSMUSG000000032458 | -0.244529375 | 7.451495     | 0.985448614 | 0.320857323 | 0.999071534 | Copb2         | Copb2    | COPB2    | 167.9408203 | 227.3180303 | 201.8933408 | 186.2909561 | 201.3090846 | 247.5368735 | 146.191848  | 146.8692938 | 96.16803384 | 159.1490786 |
| ENSMUSG000000034663 | -0.208794546 | 5.728873867  | 0.985352655 | 0.320880885 | 0.999071534 | Bmp2k         | Bmp2k    | BMP2K    | 48.84530335 | 58.99359419 | 72.84047841 | 55.36692103 | 58.14287726 | 66.50461563 | 39.34689844 | 50.56835515 | 40.0700141  | 42.81012175 |
| ENSMUSG000000071528 | 0.343725088  | 7.891033338  | 0.985272026 | 0.320900685 | 0.999071534 | Usmg5         | Usmg5    | USMG5    | 250.6830798 | 126.821405  | 238.2462598 | 305.0037404 | 155.6580966 | 135.8469556 | 277.9521855 | 228.2484227 | 320.8743874 | 264.6384473 |
| ENSMUSG000000027245 | 0.330949932  | 6.430089561  | 0.98510882  | 0.320940767 | 0.999071534 | Hypk          | Hypk     | HYPK     | 43.86252096 | 50.63369792 | 119.2914304 | 105.5301841 | 72.85845362 | 55.08095627 | 76.55819219 | 81.17188156 | 105.5962725 | 129.0185959 |
| ENSMUSG000000053522 | 1.122673416  | -0.203385547 | 0.984479721 | 0.321095332 | 0.999071534 | Lgal57        | Lgal57   | LGAL57B  | 0           | 0.296450222 | 1.413724627 | 0.138764213 | 0.654025616 | 1.018670261 | 0.258861174 | 0.345412262 | 2.985608894 | 0           |
| ENSMUSG000000082099 | 0.972793868  | -0.295048574 | 0.98389545  | 0.321238971 | 0.999071534 | Gm12013       | Gm12013  |          | 0           | 0.948640711 | 1.144443746 | 0           | 0.327012808 | 0.582097292 | 0.970729402 | 0.898071881 | 1.335667137 | 0.457512752 |
| ENSMUSG000000053038 | -0.54095729  | 1.43703414   | 0.983818158 | 0.321257979 | 0.999071534 | Gm6180        | Gm6180   |          | 3.509001677 | 4.268883197 | 3.500651458 | 1.734552664 | 2.87771271  | 4.220205368 | 3.429910554 | 1.381649048 | 0.942823861 | 0.653589645 |
| ENSMUSG000000051278 | 0.403415412  | 2.670374654  | 0.983785036 | 0.321266125 | 0.999071534 | 4930422G04Rik | Zgrf1    | ZGRF1    | 6.877643287 | 3.083082309 | 8.280387102 | 4.509836926 | 5.166802366 | 9.459080998 | 6.147952881 | 3.45412262  | 6.756904338 | 8.692742279 |
| ENSMUSG000000062906 | 0.283117983  | 4.257628833  | 0.983614356 | 0.321308106 | 0.999071534 | Hdac10        | Hdac10   | HDAC10   | 24.70337181 | 11.0872383  | 17.83985839 | 15.8885024  | 19.68617104 | 23.21112953 | 15.66110102 | 15.26722198 | 19.48502646 | 26.73181648 |
| ENSMUSG000000040054 | 0.259285596  | 5.88125304   | 0.983105526 | 0.321433303 | 0.999071534 | Baz2a         | Baz2a    | BAZ2A    | 52.84556526 | 64.86330858 | 59.44375456 | 38.85397967 | 63.1788745  | 61.04745352 | 31.83992439 | 84.55692173 | 58.6122167  | 69.21514341 |
| ENSMUSG000000032757 | 0.237545976  | 5.847376045  | 0.982590362 | 0.321560123 | 0.999071534 | Bet1          | Bet1     | BET1     | 53.47718556 | 42.21451162 | 59.98231632 | 60.4318148  | 56.83482603 | 48.82341038 | 62.32082762 | 52.43358137 | 72.4403     | 55.55511983 |
| ENSMUSG000000046731 | -0.326402405 | 5.101853626  | 0.982307977 | 0.321629667 | 0.999071534 | Kctd11        | Kctd11   | KCTD11   | 33.19515587 | 73.63823515 | 32.65030687 | 19.21884351 | 40.48418563 | 24.59361059 | 24.98010328 | 50.43019025 | 21.05639957 | 24.1174579  |
| ENSMUSG000000035354 | -0.251116964 | 4.743315323  | 0.982007233 | 0.321703755 | 0.999071534 | Uvrag         | Uvrag    | UVRAG    | 29.05453389 | 40.55439037 | 20.5326672  | 28.72419211 | 31.72024237 | 31.28772945 | 23.62108212 | 29.22187736 | 13.1209654  | 22.61420172 |
| ENSMUSG000000052040 | 0.561303497  | 7.43031027   | 0.981939849 | 0.321720357 | 0.999071534 | Klf13         | Klf13    | KLF13    | 163.3791181 | 86.14843452 | 129.9953455 | 268.925045  | 62.52484889 | 99.32035048 | 43.87696898 | 69.01336994 | 488.3041914 | 190.1292277 |
| ENSMUSG000000097056 | 0.561893849  | 4.490856201  | 0.981612092 | 0.32180113  | 0.999071534 | Gm4262        | Gm4262   |          | 10.456825   | 7.174095373 | 25.98560505 | 36.77251647 | 11.51085084 | 6.548594537 | 7.183397576 | 17.20153065 | 54.52664664 | 31.1108671  |
| ENSMUSG000000005800 | 0.644055301  | 1.185671075  | 0.980971736 | 0.321959018 | 0.999071534 | Mmp8          | Mmp8     | MMP8     | 1.19306057  | 2.490181865 | 2.154247051 | 0.624438959 | 2.289089656 | 1.164194584 | 2.135604685 | 6.839162787 | 1.492804447 | 0.71894861  |
| ENSMUSG000000092851 | -1.308247938 | -0.491851546 | 0.980633007 | 0.322042577 | 0.999071534 | Gm25960       | Gm25960  |          | 0.701800335 | 0           | 2.154247051 | 1.387642131 | 0           | 0           | 0.323576467 | 0.690824524 | 0.471411931 | 0           |
| ENSMUSG000000031714 | -0.249265283 | 4.973868108  | 0.980401432 | 0.322099719 | 0.999071534 | Gab1          | Gab1     | GAB1     | 36.49361744 | 28.10348105 | 37.29540207 | 41.28823534 | 32.57047567 | 34.70755105 | 16.37296925 | 24.3861057  | 27.73473525 | 34.50953326 |
| ENSMUSG000000031216 | 0.572073331  | 2.308350088  | 0.980287566 | 0.322127821 | 0.999071534 | Stard8        | Stard8   | STARD8   | 7.228543455 | 2.490181865 | 1.750325729 | 2.567137942 | 6.278645913 | 13.53376204 | 9.901439902 | 2.210638477 | 1.099961171 | 3.398666154 |
| ENSMUSG000000027318 | 0.779107568  | -0.189841099 | 0.979879645 | 0.322228522 | 0.999071534 | Adam33        | Adam33   | ADAM33   | 0.491260235 | 0.415030311 | 0.673202203 | 0.832585279 | 0.39241537  | 0.727621615 | 0.388291761 | 1.105319238 | 0.15713731  | 2.222204793 |
| ENSMUSG000000042814 | 0.360833866  | 3.211137947  | 0.979827722 | 0.322241343 | 0.999071534 | Mcts2         | Mcts2    | MCTS1    | 10.59718506 | 7.766995817 | 7.405224238 | 4.232308499 | 11.90326621 | 10.55051342 | 14.30207986 | 6.217420715 | 7.149747614 | 11.69925465 |
| ENSMUSG000000036180 | -0.231304904 | 6.067152013  | 0.979703464 | 0.322272027 | 0.999071534 | Gatad2a       | Gatad2a  | GATAD2A  | 81.40883891 | 84.42902324 | 65.97381593 | 64.6641233  | 79.72572259 | 114.0183071 | 56.04344415 | 52.84807608 | 39.83430813 | 46.14342894 |
| ENSMUSG000000026544 | 0.503746555  | 1.626559747  | 0.979537724 | 0.322312961 | 0.999071534 | Dusp23        | Dusp23   | DUSP23   | 1.473780704 | 3.853852886 | 2.558168373 | 1.110113705 | 3.793348573 | 2.473913492 | 3.041618794 | 5.112101477 | 3.221314859 | 2.548999616 |
| ENSMUSG000000040329 | -0.574626826 | 1.005697557  | 0.97937623  | 0.322352853 | 0.999071534 | Ii7           | Ii7      | IL7      | 2.105401006 | 1.778701332 | 3.366011017 | 2.22022741  | 2.158284533 | 1.673529715 | 0.388291761 | 1.865226215 | 2.278490998 | 0.849666539 |
| ENSMUSG000000014606 | -0.236419899 | 6.251109075  | 0.979285942 | 0.322375159 | 0.999071534 | Sk25a11       | Sk25a11  | SLC25A11 | 115.7970553 | 83.00606217 | 70.28231004 | 72.57368345 | 86.92000436 | 102.3763613 | 90.92498734 | 57.68384775 | 37.87009176 | 58.5616322  |
| ENSMUSG000000057092 | 1.606347224  | -0.801624275 | 0.97874914  | 0.322507818 | 0.999071534 | Fxyd3         | Fxyd3    | FXYD3    | 0           | 0           | 1.009803305 | 0           | 0.065402562 | 3.492583753 | 0           | 0           | 0.078568655 | 0.196076894 |
| ENSMUSG000000024989 | 0.313258747  | 4.795989374  | 0.978586068 | 0.322548133 | 0.999071534 | Cep55         | Cep55    | CEP55    | 26.66841275 | 11.6208487  | 31.97710466 | 27.5446963  | 29.95437321 | 44.45768069 | 36.49942552 | 15.88896405 | 32.05601128 | 19.93448417 |
| ENSMUSG000000019842 | 0.305670484  | 4.925008287  | 0.978384726 | 0.322597917 | 0.999071534 | Traf3ip2      | Traf3ip2 | TRAF3IP2 | 21.19437013 | 29.82289234 | 24.57188042 | 25.04694046 | 40.15717282 | 22.99284304 | 18.63800452 | 54.64421984 | 23.88487115 | 38.82322492 |
| ENSMUSG000000035164 | 0.496349407  | 1.889293611  | 0.978299216 | 0.322619063 | 0.999071534 | Zc3h12c       | Zc3h12c  | ZC3H12C  | 3.228281543 | 3.320242487 | 1.548365068 | 3.260959008 | 4.054958819 | 7.348978314 | 4.077063489 | 3.315957715 | 4.635550651 | 1.111102397 |

|                     |              |              |             |             |             |          |          |          |             |             |             |             |             |             |             |             |             |             |
|---------------------|--------------|--------------|-------------|-------------|-------------|----------|----------|----------|-------------|-------------|-------------|-------------|-------------|-------------|-------------|-------------|-------------|-------------|
| ENSMUSG00000051391  | -0.254364884 | 8.614183516  | 0.97786523  | 0.322726415 | 0.999071534 | Ywhag    | Ywhag    | YWHAG    | 406.6932944 | 490.0915071 | 418.866411  | 351.9754265 | 553.174866  | 517.9938279 | 282.2881102 | 363.0282873 | 255.2695604 | 339.1476668 |
| ENSMUSG00000014602  | -0.917010829 | -0.311585177 | 0.977503314 | 0.322815976 | 0.999071534 | Kif1a    | Kif1a    | KIF1A    | 2.38612114  | 0.474320355 | 0.605881983 | 0.763203172 | 0.327012808 | 1.819054038 | 0.064715293 | 0.27632981  | 0.078586655 | 0.261435858 |
| ENSMUSG00000053414  | -0.904305277 | -0.376899499 | 0.977466974 | 0.322824971 | 0.999071534 | Hunk     | Hunk     | HUNK     | 1.19306057  | 1.660121243 | 0.740522424 | 0.20814632  | 0.523220493 | 0.509335131 | 0.711868228 | 0.138164905 | 0.707117896 | 0           |
| ENSMUSG00000045594  | -0.271142051 | 5.469917623  | 0.977454696 | 0.32282801  | 0.999071534 | Glb1     | Glb1     | GLB1     | 56.63528707 | 61.18732583 | 42.47905904 | 46.20848296 | 44.73535213 | 56.31791302 | 63.35627232 | 36.75186467 | 17.28510412 | 26.1435858  |
| ENSMUSG00000024785  | 0.278168989  | 4.508856602  | 0.977107477 | 0.322913968 | 0.999071534 | Rcl1     | Rcl1     | RCL1     | 24.77355184 | 15.59328168 | 19.59018412 | 21.78598146 | 24.5259606  | 34.4165024  | 35.14040436 | 12.36575898 | 17.59937874 | 22.81027861 |
| ENSMUSG00000028745  | -0.247485058 | 8.440007771  | 0.976732728 | 0.323006776 | 0.999071534 | Capzb    | Capzb    | CAPZB    | 370.269857  | 387.8161805 | 385.8121828 | 394.4372757 | 417.0067327 | 356.1707807 | 286.9476113 | 384.0293529 | 211.2711136 | 305.9453128 |
| ENSMUSG00000020346  | -0.222526491 | 6.57795378   | 0.976447972 | 0.323077321 | 0.999071534 | Mgat1    | Mgat1    | MGAT1    | 135.7281849 | 116.5642273 | 89.46857283 | 102.8242819 | 89.20909402 | 116.9287936 | 104.3210531 | 66.66456656 | 63.79774794 | 80.32616738 |
| ENSMUSG00000029594  | 0.332403773  | 3.909847521  | 0.976377207 | 0.323094855 | 0.999071534 | Rbm19    | Rbm19    | RBM19    | 17.12392818 | 15.00038123 | 14.47384737 | 7.493267507 | 14.91178404 | 32.30639972 | 20.19117157 | 8.428059192 | 9.428238612 | 13.79074151 |
| ENSMUSG00000003418  | 0.799199523  | 0.07548831   | 0.976033637 | 0.323180003 | 0.999071534 | St8sia6  | St8sia6  | ST8SIA6  | 0.842160403 | 0.296450222 | 0.605881983 | 0.555056852 | 1.177246109 | 1.309718907 | 3.429910554 | 0.414494714 | 0.15713731  | 0.522871716 |
| ENSMUSG00000046574  | -0.257681324 | 4.810254148  | 0.975938767 | 0.32320352  | 0.999071534 | Prr12    | Prr12    | PRR12    | 26.59823271 | 31.72017376 | 32.38102598 | 30.25059846 | 36.9524473  | 38.27289696 | 13.52549634 | 31.57068074 | 17.6779744  | 24.18281687 |
| ENSMUSG00000002058  | -0.237433825 | 4.753687623  | 0.975917294 | 0.323208843 | 0.999071534 | Unc119   | Unc119   | UNC119   | 23.93139144 | 28.87425163 | 29.08233519 | 34.55228906 | 33.87852691 | 23.28389169 | 19.67344922 | 28.32380548 | 20.03500705 | 26.86253441 |
| ENSMUSG00000027995  | -0.296171811 | 4.985033526  | 0.975886586 | 0.323216456 | 0.999071534 | Tlr2     | Tlr2     | TLR2     | 51.37178455 | 54.01323045 | 24.23527932 | 29.07110264 | 22.43307863 | 43.00243746 | 38.82917609 | 22.31363212 | 15.00661312 | 22.09133    |
| ENSMUSG00000040701  | 0.309481078  | 4.35461386   | 0.974981628 | 0.32344091  | 0.999071534 | Ap1g2    | Ap1g2    | AP1G2    | 13.96582667 | 16.9569527  | 19.11894258 | 22.89609516 | 20.86341715 | 18.3360647  | 10.67802342 | 21.89913741 | 26.55620542 | 27.97363681 |
| ENSMUSG00000021066  | 0.654810949  | 0.724064649  | 0.974762244 | 0.323495354 | 0.999071534 | At1l     | At1l     | ATL1     | 0.631620302 | 0.770770577 | 1.481044848 | 1.665170557 | 1.569661478 | 0.727621615 | 0.517722348 | 1.588896405 | 2.278490998 | 3.529384083 |
| ENSMUSG000000031375 | 0.532026559  | 5.559440092  | 0.974442916 | 0.323574623 | 0.999071534 | Bgn      | Bgn      | BGN      | 45.33630167 | 40.91013064 | 60.85747919 | 18.10872981 | 35.70979863 | 149.0169068 | 108.5275472 | 12.36575898 | 9.271101302 | 16.92797181 |
| ENSMUSG000000037474 | 0.312135571  | 4.85653602   | 0.97355387  | 0.323795451 | 0.999071534 | Dtl      | Dtl      | DTL      | 26.45787265 | 11.20581839 | 36.68952009 | 32.8177364  | 25.63780415 | 37.39975102 | 39.02332197 | 21.20831288 | 34.80591421 | 20.58807382 |
| ENSMUSG00000083200  | -0.669292278 | 0.092717845  | 0.973476094 | 0.323814778 | 0.999071534 | Gm15066  | Gm15066  |          | 1.263240604 | 2.253021687 | 0.673202203 | 0.763203172 | 0.981038424 | 1.164194584 | 0.647152935 | 0.828989429 | 0.549980586 | 0.326794823 |
| ENSMUSG000000031352 | 0.225097649  | 5.247081987  | 0.97317701  | 0.323889118 | 0.999071534 | Hccs     | Hccs     | HCCS     | 36.63397751 | 37.88633838 | 35.67971678 | 33.78908589 | 37.34486267 | 48.45959957 | 58.24376413 | 27.84022831 | 28.59899046 | 36.33958426 |
| ENSMUSG000000063698 | 0.643365911  | 1.217731766  | 0.972995372 | 0.323934276 | 0.999071534 | Sfxn4    | Sfxn4    | SFXN4    | 0.842160403 | 1.363671021 | 1.88496617  | 2.844666369 | 1.896674286 | 0.436572969 | 2.523896446 | 0.898071881 | 3.69272679  | 4.705845444 |
| ENSMUSG000000052565 | -0.864706919 | -0.151017226 | 0.972455459 | 0.324068557 | 0.999071534 | Hist1h1d | Hist1h1d | HIST1H1D | 2.596661241 | 1.067220799 | 1.009803305 | 0           | 0.523220493 | 0.436572969 | 0.970729402 | 0.414494714 | 0.31427462  | 0.457512752 |
| ENSMUSG000000064353 | 1.119567057  | 0.011354712  | 0.97245358  | 0.324069025 | 0.999071534 | mt-Td    | mt-Td    |          | 0.350900168 | 0           | 1.615685288 | 0.416292639 | 0.588623054 | 0.145524323 | 0.323576467 | 1.519813953 | 3.299883514 | 0           |
| ENSMUSG000000042524 | -0.219936636 | 6.494235893  | 0.972410669 | 0.3240797   | 0.999071534 | Sun2     | Sun2     | SUN2     | 93.19908454 | 127.4735955 | 94.18098826 | 87.07454372 | 101.8317884 | 116.4194584 | 69.76308637 | 97.40625788 | 55.62660781 | 69.67265616 |
| ENSMUSG000000048707 | -0.378975158 | 2.758002426  | 0.972379066 | 0.324087563 | 0.999071534 | Tprm     | Tprm     | TPRN     | 8.000523824 | 7.055515284 | 10.50195437 | 5.203657991 | 8.306125323 | 8.731459383 | 5.241938772 | 3.523205072 | 2.985608894 | 8.235229528 |
| ENSMUSG000000085099 | 0.774656417  | -0.175672208 | 0.972291051 | 0.324109461 | 0.999071534 | Gm16288  | Gm16288  |          | 0.98252047  | 1.067220799 | 0.269280881 | 0.20814632  | 0.39241537  | 0.218286485 | 0.970729402 | 0.898071881 | 1.099961171 | 1.241820326 |
| ENSMUSG000000007411 | 0.217494581  | 6.137963113  | 0.970652584 | 0.32451748  | 0.999071534 | Mark3    | Mark3    | MARK3    | 61.12680921 | 59.52720458 | 78.63001736 | 69.17396023 | 68.34567687 | 93.28109107 | 60.96180646 | 57.54568284 | 78.09724317 | 73.52883507 |
| ENSMUSG000000041328 | 0.246872183  | 5.264826147  | 0.970451872 | 0.324567509 | 0.999071534 | Pcf11    | Pcf11    | PCF11    | 27.79129328 | 34.03248549 | 41.73853661 | 35.24611013 | 42.96948297 | 36.01726995 | 26.72741621 | 42.69295558 | 44.39129013 | 46.53558273 |
| ENSMUSG000000005034 | -0.21170376  | 6.616179067  | 0.970193585 | 0.324631904 | 0.999071534 | Prkacb   | Prkacb   | PRKACB   | 93.40962464 | 117.3942879 | 110.00124   | 105.9464767 | 119.0326621 | 135.1193339 | 82.25313801 | 88.21829171 | 59.94788384 | 83.20196181 |
| ENSMUSG000000000568 | 0.262061292  | 7.151965829  | 0.970174595 | 0.324636639 | 0.999071534 | Hnrrnpd  | Hnrrnpd  | HNRNPD   | 105.4805904 | 95.10123123 | 181.1587129 | 120.9330117 | 168.280791  | 209.0456901 | 103.4797543 | 146.2475517 | 124.2956124 | 173.135897  |
| ENSMUSG000000020956 | -0.283138397 | 3.804805667  | 0.969871423 | 0.324712248 | 0.999071534 | Dtd2     | Dtd2     | DTD2     | 19.43986929 | 12.51019937 | 17.63789773 | 15.05591712 | 14.25775843 | 16.0804377  | 16.11410808 | 9.80970824  | 9.428238612 | 9.607767782 |
| ENSMUSG000000035311 | 0.269530806  | 5.377901282  | 0.969739903 | 0.324745055 | 0.999071534 | Gnptab   | Gnptab   | GNPTAB   | 50.88052432 | 51.9380789  | 24.57188042 | 31.15256584 | 37.54107036 | 57.91868057 | 67.75691227 | 26.73490908 | 28.04900987 | 43.00619864 |
| ENSMUSG000000028159 | -0.266034671 | 4.026431229  | 0.96971927  | 0.324750202 | 0.999071534 | Dapp1    | Dapp1    | DAPP1    | 18.38716879 | 13.2216799  | 21.81175139 | 19.84328247 | 18.11650956 | 18.918162   | 11.71346812 | 16.30345876 | 11.5495293  | 12.94107497 |
| ENSMUSG000000038126 | 0.350367765  | 2.825242766  | 0.969454605 | 0.324816237 | 0.999071534 | Mphosph9 | Mphosph9 | MPHOSPH9 | 8.842684226 | 5.632554219 | 4.241173882 | 5.758714844 | 7.39048946  | 10.84156207 | 7.118682283 | 8.08264693  | 5.499805857 | 6.731973344 |
| ENSMUSG000000026743 | 0.236611248  | 4.791807914  | 0.969244369 | 0.324868703 | 0.999071534 | Mlt10    | Mlt10    | MLLT10   | 24.0717515  | 27.98490096 | 23.831358   | 22.06350988 | 33.87852691 | 31.36049162 | 27.30985385 | 38.68617334 | 18.22792798 | 29.41153403 |
| ENSMUSG000000073705 | 0.377633109  | 3.542323964  | 0.968679099 | 0.325009829 | 0.999071534 | Apitd1   | Apitd1   | APITD1   | 14.87816711 | 4.921073686 | 11.5790779  | 11.58681179 | 8.960150939 | 18.918162   | 20.19117157 | 5.733843549 | 9.742513232 | 9.673126747 |
| ENSMUSG000000074513 | -0.228022909 | 6.097575348  | 0.968158376 | 0.325139905 | 0.999071534 | Arfp1    | Arfp1    | ARFIP1   | 73.40831508 | 97.47283301 | 74.38884348 | 60.08490427 | 78.6792816  | 86.15039924 | 80.63525568 | 61.89787734 | 35.12018883 | 47.71204409 |
| ENSMUSG000000047368 | 0.235921393  | 5.184269182  | 0.967752779 | 0.32524127  | 0.999071534 | Abhd17b  | Abhd17b  | ABHD17B  | 34.87947667 | 30.47508283 | 33.99671127 | 38.36830492 | 34.59795508 | 41.11062126 | 55.5904371  | 28.8764651  | 35.19875748 | 27.84291888 |
| ENSMUSG000000049516 | -0.270470459 | 4.446198415  | 0.96695346  | 0.325441154 | 0.999071534 | Spty2d1  | Spty2d1  | SPTY2D1  | 24.42265167 | 39.07213926 | 18.44574037 | 17.06799821 | 24.59136316 | 28.52276732 | 17.14955277 | 20.37932346 | 15.87086833 | 14.24825426 |
| ENSMUSG000000026439 | 0.233451351  | 4.632016529  | 0.966132872 | 0.325646527 | 0.999071534 | Rbbp5    | Rbbp5    | RBBP5    | 22.24707063 | 28.5778014  | 21.54247051 | 20.88401407 | 24.65676572 | 36.09003212 | 23.42693624 | 30.46536151 | 15.47802505 | 25.94750891 |
| ENSMUSG000000032380 | 0.659505169  | 0.478809592  | 0.965529597 | 0.325797621 | 0.999071534 | Dapk2    | Dapk2    | DAPK2    | 1.263240604 | 1.600831199 | 0.875162864 | 0.624438959 | 0.784830739 | 1.528005392 | 0.906014109 | 0.898071881 | 3.221314859 | 0.588230681 |

|                     |              |              |             |             |             |           |           |          |             |             |             |             |             |             |             |             |             |             |
|---------------------|--------------|--------------|-------------|-------------|-------------|-----------|-----------|----------|-------------|-------------|-------------|-------------|-------------|-------------|-------------|-------------|-------------|-------------|
| ENSMUSG00000030213  | 0.234571735  | 5.270279915  | 0.965341286 | 0.325844803 | 0.999071534 | Atf7lp    | Atf7lp    | ATF7IP   | 34.87947667 | 42.09593153 | 35.47775612 | 36.91128068 | 33.87852691 | 50.78798874 | 23.16807507 | 39.23883296 | 41.95566182 | 44.64017276 |
| ENSMUSG00000036943  | -0.236660278 | 6.334731402  | 0.964571676 | 0.326037729 | 0.999071534 | Rab8b     | Rab8b     | RAB8B    | 107.3754513 | 113.421855  | 77.75485449 | 80.13633306 | 74.68972534 | 109.8708639 | 94.61375907 | 67.21722618 | 42.97705434 | 52.81004332 |
| ENSMUSG00000090952  | 0.48792999   | 1.408913639  | 0.964436632 | 0.326071597 | 0.999071534 | Gm17251   | Gm17251   |          | 1.824680872 | 2.312311732 | 1.279084186 | 3.260959008 | 2.158284533 | 2.328389169 | 1.812028217 | 3.799534882 | 2.671334273 | 3.398666154 |
| ENSMUSG00000022390  | -0.242076819 | 5.927358497  | 0.964352476 | 0.326092705 | 0.999071534 | Zc3h7b    | Zc3h7b    | ZC3H7B   | 67.30265217 | 74.05326546 | 68.39734387 | 66.12114754 | 65.7295744  | 107.7607612 | 34.10495966 | 46.42340801 | 33.941659   | 58.23483737 |
| ENSMUSG00000015202  | -0.26246101  | 4.196375658  | 0.964149043 | 0.326143739 | 0.999071534 | Cnksr3    | Cnksr3    | IPCEF1   | 18.94860906 | 26.26548967 | 20.93658853 | 16.23541293 | 20.92881971 | 18.11777822 | 12.8783434  | 21.69189005 | 10.44963113 | 17.32012559 |
| ENSMUSG00000055044  | -0.2284431   | 6.673104743  | 0.963287892 | 0.326359884 | 0.999071534 | Pdlim1    | Pdlim1    | PDLIM1   | 112.5687738 | 114.5483658 | 122.8594021 | 92.1394375  | 130.4781104 | 132.7909448 | 115.7109447 | 91.32700206 | 49.41968406 | 76.79678329 |
| ENSMUSG00000057530  | -0.244588292 | 5.497477878  | 0.963147205 | 0.326395214 | 0.999071534 | Ece1      | Ece1      | ECE1     | 59.51266844 | 73.93468538 | 46.72023292 | 33.02588272 | 41.79223686 | 69.85167506 | 36.6935714  | 34.47214374 | 27.10618601 | 37.45068666 |
| ENSMUSG00000016481  | 0.238064278  | 5.105795596  | 0.962928664 | 0.326450104 | 0.999071534 | Cr1l      | Cr1l      | CR1L     | 34.24785637 | 39.96148993 | 29.21697563 | 26.64272891 | 33.87852691 | 40.23747532 | 55.33157592 | 35.50838053 | 21.99922343 | 28.43114956 |
| ENSMUSG00000020664  | 0.230998606  | 6.795079364  | 0.962733362 | 0.326499169 | 0.999071534 | Did       | Did       | DLD      | 103.5857295 | 109.449422  | 100.2398081 | 115.9375    | 99.41189363 | 118.456799  | 158.3583231 | 80.8264693  | 100.6464472 | 118.8225975 |
| ENSMUSG00000049511  | 0.830358874  | 0.16381502   | 0.962677365 | 0.326513238 | 0.999071534 | Htr1b     | Htr1b     | HTR1B    | 1.263240604 | 0.711480533 | 0.336601102 | 1.179495811 | 0.130805123 | 3.929156722 | 1.812028217 | 0.27632981  | 0.31427462  | 0.392153787 |
| ENSMUSG00000013155  | 0.262367722  | 4.069299142  | 0.962549366 | 0.326545402 | 0.999071534 | Enkd1     | Enkd1     | ENKD1    | 16.91338808 | 11.02794826 | 16.69541464 | 16.58232347 | 17.33167882 | 23.28389169 | 17.14955277 | 12.64208879 | 15.24231909 | 20.13056107 |
| ENSMUSG00000028967  | -0.321672825 | 7.533092702  | 0.962397146 | 0.326583657 | 0.999071534 | Errf1     | Errf1     | ERRF1    | 191.1704114 | 389.0612714 | 175.369174  | 130.5771245 | 187.7707543 | 129.6621718 | 149.5570432 | 261.269835  | 112.6674514 | 133.9858772 |
| ENSMUSG00000058655  | -0.260797564 | 8.810551882  | 0.962390195 | 0.326585404 | 0.999071534 | Elf4b     | Elf4b     | EIF4B    | 427.1156841 | 668.2580905 | 474.472913  | 405.1915022 | 573.318855  | 554.6659573 | 296.6549053 | 438.9499025 | 313.2532279 | 392.153787  |
| ENSMUSG00000027570  | 0.570432975  | 1.798919557  | 0.962370546 | 0.326590342 | 0.999071534 | Col9a3    | Col9a3    | COL9A3   | 4.070441945 | 1.660121243 | 2.356207712 | 1.80393477  | 4.251166504 | 3.201535107 | 0.453007054 | 5.526596192 | 4.792687961 | 4.771204409 |
| ENSMUSG000000081648 | 0.772990026  | 0.209648176  | 0.96231977  | 0.326603105 | 0.999071534 | Gm13423   | Gm13423   |          | 0.701800335 | 0.355740266 | 1.750325729 | 0.693821065 | 0.457817931 | 0.436572969 | 0.19414588  | 1.657978857 | 1.964216377 | 1.699333077 |
| ENSMUSG00000029419  | -0.685630153 | 0.196152883  | 0.961944039 | 0.326697564 | 0.999071534 | Gm996     | Gm996     | C9orf172 | 0.701800335 | 0.889350666 | 1.88496617  | 1.595788451 | 1.373453794 | 0.291048646 | 0.323576467 | 1.105319238 | 0.942823861 | 0.915025503 |
| ENSMUSG00000005958  | -0.273738929 | 3.950389046  | 0.961604983 | 0.326782835 | 0.999071534 | Ephb3     | Ephb3     | EPHB3    | 17.82572852 | 16.89766266 | 17.97449883 | 13.04383603 | 21.71365045 | 15.06176744 | 10.48387754 | 18.30684988 | 9.271101302 | 14.1828953  |
| ENSMUSG000000022021 | 0.265785674  | 5.412120117  | 0.959799672 | 0.327237355 | 0.999071534 | Diap3     | Diaph3    | DIAPH3   | 43.09054059 | 33.08384478 | 41.40193551 | 30.52812688 | 52.97607489 | 87.1690695  | 55.13743004 | 25.8368372  | 31.27032473 | 33.65986672 |
| ENSMUSG00000025666  | 0.399949929  | 2.653954862  | 0.959637681 | 0.327278181 | 0.999071534 | Tmem47    | Tmem47    | TMEM47   | 4.000261912 | 5.810424352 | 6.328100712 | 4.856747458 | 6.605658721 | 7.567264798 | 10.22501637 | 3.108710358 | 7.85686551  | 4.771204409 |
| ENSMUSG00000037731  | -0.382064213 | 3.446449238  | 0.958867912 | 0.327472271 | 0.999071534 | Themis2   | Themis2   | THEMIS2  | 17.54500839 | 14.17032061 | 11.915679   | 9.366584384 | 10.52981242 | 22.41074575 | 8.283557565 | 3.730452429 | 5.106962581 | 8.627383315 |
| ENSMUSG00000020661  | -0.281462588 | 4.113130847  | 0.958494497 | 0.32756648  | 0.999071534 | Dnmt3a    | Dnmt3a    | DNMT3A   | 25.68589228 | 23.8938879  | 19.5228639  | 13.46012867 | 15.69661478 | 25.75780518 | 10.9368846  | 15.88896405 | 11.94243557 | 12.09140843 |
| ENSMUSG00000036197  | 0.200061765  | 5.733437757  | 0.958472202 | 0.327572106 | 0.999071534 | Gxylt1    | Gxylt1    | GXYLT1   | 43.5116208  | 52.76813952 | 56.21238399 | 52.52225466 | 50.94859548 | 68.8330048  | 54.49027711 | 43.72919237 | 51.69817505 | 55.68583776 |
| ENSMUSG00000035385  | 0.292455398  | 8.562165299  | 0.958430249 | 0.327582693 | 0.999071534 | Cc12      | Cc12      | CCL2     | 437.9935893 | 216.1122119 | 327.7821528 | 407.6892581 | 369.9168884 | 335.7973754 | 446.9238168 | 299.9560083 | 313.7246398 | 601.3678324 |
| ENSMUSG00000026860  | -0.217841529 | 4.774320995  | 0.958261587 | 0.327625259 | 0.999071534 | Sh3glb2   | Sh3glb2   | SH3GLB2  | 32.0020953  | 25.07968878 | 32.1117451  | 28.86295632 | 34.07473459 | 33.17954565 | 21.29133155 | 23.14262155 | 19.56359512 | 25.75143201 |
| ENSMUSG000000022756 | -0.391181119 | 2.234756529  | 0.957750112 | 0.327754387 | 0.999071534 | Slc7a4    | Slc7a4    | SLC7A4   | 5.474042616 | 3.557402664 | 6.732022034 | 5.689332737 | 5.428412612 | 6.184783729 | 3.753487022 | 2.625133191 | 3.299883514 | 3.594743048 |
| ENSMUSG000000052373 | 0.662190508  | 0.718875508  | 0.957416548 | 0.327838636 | 0.999071534 | Mpp3      | Mpp3      | MPP3     | 2.035220973 | 0.889350666 | 0.471241542 | 1.318260024 | 1.373453794 | 0.582097292 | 1.812028217 | 1.934308667 | 0.471411931 | 4.117614764 |
| ENSMUSG000000027349 | 0.288447058  | 5.223334373  | 0.957029458 | 0.32793644  | 0.999071534 | Fam98b    | Fam98b    | FAM98B   | 26.73859278 | 23.65672772 | 49.68232261 | 38.1601586  | 34.99037045 | 51.00627523 | 24.98010328 | 26.87307398 | 53.26954816 | 38.16963527 |
| ENSMUSG000000091898 | 0.45535324   | 2.540080217  | 0.956626391 | 0.328038322 | 0.999071534 | Tnnc1     | Tnnc1     | TNNC1    | 7.439083555 | 3.142372354 | 4.712415424 | 6.730064335 | 2.746907587 | 2.910486461 | 5.241938772 | 5.112101477 | 8.01400282  | 9.150255031 |
| ENSMUSG000000091957 | -0.341127404 | 10.86751391  | 0.956460088 | 0.32808037  | 0.999071534 | Rps2-ps10 | Rps2-ps10 |          | 2885.311719 | 2386.661448 | 1834.408684 | 1555.754975 | 2239.972332 | 2933.915877 | 2596.636436 | 1147.04504  | 518.3174177 | 1213.912048 |
| ENSMUSG000000060950 | 0.549756099  | 2.872067273  | 0.956233415 | 0.328137694 | 0.999071534 | Trmt61a   | Trmt61a   | TRMT61A  | 10.8779052  | 6.106874574 | 5.92417939  | 2.567137942 | 5.101399804 | 17.89949173 | 17.92613629 | 1.657978857 | 3.378452169 | 3.137230296 |
| ENSMUSG000000097680 | -0.869629982 | -0.657787412 | 0.956218596 | 0.328141442 | 0.999071534 | Gm26642   | Gm26642   |          | 1.122880537 | 0.415030311 | 1.077123525 | 0.277528426 | 0.457817931 | 0.873145938 | 0.388291761 | 0.345412262 | 0           | 0.196076894 |
| ENSMUSG000000060166 | -0.202597692 | 5.519292631  | 0.955944869 | 0.328210684 | 0.999071534 | Zdhc8     | Zdhc8     | ZDHC8    | 49.05584345 | 58.45998379 | 52.44245165 | 44.33516608 | 50.09836218 | 56.09962653 | 34.88154319 | 46.2852431  | 28.91326508 | 42.22189107 |
| ENSMUSG000000024055 | 0.304210161  | 4.131425476  | 0.955812445 | 0.328244189 | 0.999071534 | Cyp4f13   | Cyp4f13   | CYP4F8   | 13.19384631 | 16.36405226 | 17.36861685 | 15.95788451 | 17.85489932 | 12.95166475 | 10.8721693  | 23.62619872 | 16.34228026 | 27.18932923 |
| ENSMUSG000000039126 | -0.230657074 | 5.353581219  | 0.955794386 | 0.328248759 | 0.999071534 | Prune2    | Prune2    | PRUNE2   | 40.49387935 | 48.38067624 | 38.17056493 | 48.7062388  | 52.4528544  | 47.44092931 | 21.29133155 | 37.64993655 | 32.84169783 | 42.41796796 |
| ENSMUSG000000023932 | 0.221194137  | 5.808253403  | 0.95570284  | 0.328271924 | 0.999071534 | Cdc5l     | Cdc5l     | CDC5L    | 65.19725116 | 67.2942004  | 39.78625022 | 47.45736088 | 48.92111607 | 76.83684257 | 69.69837108 | 41.03497672 | 53.1909795  | 51.69894092 |
| ENSMUSG000000026510 | -0.269166889 | 4.230716144  | 0.95570169  | 0.328272215 | 0.999071534 | Trp53bp2  | Trp53bp2  | TP53BP2  | 17.05374815 | 24.19033812 | 19.65750434 | 23.03485937 | 21.58284533 | 22.1196971  | 9.577863435 | 20.24115855 | 12.64955347 | 17.84299731 |
| ENSMUSG000000067224 | -0.728062999 | 0.554655365  | 0.955470651 | 0.328330688 | 0.999071534 | Gm3695    | Gm3695    |          | 1.965040939 | 2.786632087 | 1.548365068 | 0.901967385 | 1.438856355 | 0.654859454 | 1.68259763  | 2.072473572 | 0           | 0.457512752 |
| ENSMUSG000000052783 | 0.482175345  | 2.114416851  | 0.955401684 | 0.328348146 | 0.999071534 | Grk4      | Grk4      | GRK4     | 2.456301174 | 2.134441599 | 1.683005509 | 6.799446442 | 4.90519212  | 4.365729691 | 3.17104938  | 4.62852431  | 3.614158135 | 7.777716776 |
| ENSMUSG000000032253 | 0.374219568  | 7.107140908  | 0.955106464 | 0.328422888 | 0.999071534 | Phip      | Phip      | PHIP     | 74.53119562 | 61.42448601 | 179.6103479 | 182.2667939 | 117.9862211 | 111.1078206 | 66.33317582 | 158.958723  | 207.1855435 | 175.0966659 |

|                     |              |              |             |             |             |               |               |          |             |             |             |             |             |              |             |             |             |             |
|---------------------|--------------|--------------|-------------|-------------|-------------|---------------|---------------|----------|-------------|-------------|-------------|-------------|-------------|--------------|-------------|-------------|-------------|-------------|
| ENSMUSG00000035781  | -0.224636701 | 6.284053334  | 0.954953731 | 0.328461565 | 0.999071534 | R3hdm4        | R3hdm4        | R3HDM4   | 81.75973908 | 90.47660777 | 78.96661846 | 74.37761822 | 110.988147  | 72.25282639  | 65.68602288 | 95.47194921 | 41.79852451 | 73.4634761  |
| ENSMUSG00000056952  | -0.297601706 | 5.329213031  | 0.954847059 | 0.328488581 | 0.999071534 | Tatdn2        | Tatdn2        | TATDN2   | 50.66988422 | 69.66580218 | 38.91108736 | 27.82222473 | 43.88511883 | 61.48402649  | 44.07111486 | 37.64993655 | 11.94243557 | 26.92789338 |
| ENSMUSG00000013974  | -0.549300541 | 2.174210719  | 0.954119982 | 0.328672804 | 0.999071534 | 1810033817Rik | Mcemp1        | MCEMP1   | 12.21132584 | 7.589125684 | 3.164050356 | 0.971349492 | 3.466335765 | 5.166113468  | 5.889091707 | 2.763298096 | 1.492804447 | 2.418281687 |
| ENSMUSG00000020307  | 0.252262785  | 6.468365751  | 0.954031704 | 0.328695181 | 0.999071534 | Cdc34         | Cdc34         | CDC34    | 109.6212124 | 75.00190617 | 74.99472546 | 73.26750452 | 87.31241973 | 108.8521936  | 158.4877537 | 63.62493865 | 59.71217787 | 80.6529622  |
| ENSMUSG00000036181  | -0.346339645 | 6.952553837  | 0.953266275 | 0.328889286 | 0.999071534 | Hist1h1c      | Hist1h1c      | HIST1H1C | 181.5557468 | 153.9169553 | 145.9502377 | 129.3282466 | 108.8952651 | 52.60704278  | 51.31922773 | 202.8951627 | 92.47530705 | 109.6723424 |
| ENSMUSG00000028093  | 0.228273931  | 5.126110341  | 0.952951951 | 0.32896904  | 0.999071534 | Acp6          | Acp6          | ACP6     | 30.31777449 | 29.1114118  | 36.0836381  | 26.64272891 | 44.73535213 | 32.23363755  | 32.09878557 | 41.9330486  | 32.13457994 | 40.71863489 |
| ENSMUSG00000030663  | 0.245113467  | 6.368432067  | 0.952943854 | 0.328971095 | 0.999071534 | 1110004F10Rik | 1110004F10Rik | C11orf58 | 92.70782431 | 75.23906635 | 75.86988833 | 71.94924449 | 76.71720475 | 98.15615589  | 149.4923279 | 64.38484563 | 59.79074653 | 65.09752865 |
| ENSMUSG00000084915  | 0.697184346  | 0.318277869  | 0.952778001 | 0.329013188 | 0.999071534 | C230037L18Rik | C230037L18Rik |          | 0.210540101 | 0.830060622 | 1.211763966 | 1.80393477  | 0.261610246 | 1.528005392  | 1.423736457 | 2.072473572 | 0.628549241 | 1.111102397 |
| ENSMUSG00000026305  | 0.24670501   | 7.04836487   | 0.952452286 | 0.329095874 | 0.999071534 | Lrrfp1        | Lrrfp1        | LRRFIP1  | 106.2525708 | 141.525336  | 117.4737845 | 113.1622158 | 150.4912942 | 123.4046259  | 110.9867283 | 183.552076  | 133.0953017 | 130.0643394 |
| ENSMUSG00000036185  | 0.569258924  | 1.905662156  | 0.952265438 | 0.329143319 | 0.999071534 | Sapcd1        | Sapcd1        | SAPCD1   | 2.105401006 | 1.304380977 | 3.164050356 | 4.787365352 | 3.662543449 | 1.45524323   | 1.553167044 | 2.970545453 | 6.992610304 | 6.601255415 |
| ENSMUSG00000016181  | 0.271137908  | 3.815804044  | 0.952084078 | 0.32918938  | 0.999071534 | Diexf         | Diexf         | DIEXF    | 14.73780704 | 12.62877946 | 16.49345398 | 11.03175494 | 10.79142266 | 18.04501606  | 13.26663516 | 12.71117124 | 13.74951464 | 15.94758734 |
| ENSMUSG00000056342  | 0.289580926  | 7.074084483  | 0.951911068 | 0.329233328 | 0.999071534 | Usp34         | Usp34         | USP34    | 87.30396173 | 122.0782014 | 161.635849  | 137.9316278 | 117.2667929 | 132.5726583  | 83.74158976 | 130.7039999 | 190.8432632 | 154.1164383 |
| ENSMUSG00000042116  | -0.236010361 | 5.784210181  | 0.951798437 | 0.329261943 | 0.999071534 | Vwa1          | Vwa1          | VWA1     | 56.2843869  | 97.82857327 | 45.30650829 | 46.06971875 | 64.61773086 | 66.14080482  | 55.5904371  | 53.81523041 | 30.40606952 | 42.54868589 |
| ENSMUSG00000027466  | -0.207087505 | 5.841700493  | 0.951716926 | 0.329282653 | 0.999071534 | Rbck1         | Rbck1         | RBCK1    | 73.54867515 | 61.54306609 | 67.65682144 | 52.66101887 | 63.76749756 | 81.78466955  | 44.78298309 | 45.93983084 | 32.52742321 | 58.75770909 |
| ENSMUSG00000000290  | -0.335733543 | 5.819877507  | 0.951585075 | 0.329316158 | 0.999071534 | Itgb2         | Itgb2         | ITGB2    | 98.60294713 | 88.81648652 | 38.50716604 | 44.5433124  | 58.33908494 | 93.71766404  | 55.65515239 | 55.68045663 | 12.49241616 | 37.31996873 |
| ENSMUSG000000046139 | -0.285394689 | 5.217760441  | 0.951425417 | 0.329356735 | 0.999071534 | Patl1         | Patl1         | PATL1    | 32.14245536 | 56.44412228 | 49.14376085 | 27.47531419 | 47.22064947 | 45.54911311  | 21.09718567 | 53.4007357  | 17.75651605 | 26.86253441 |
| ENSMUSG00000031825  | 0.404978873  | 2.607658761  | 0.950786165 | 0.329519267 | 0.999071534 | Crispld2      | Crispld2      | CRISPLD2 | 6.246022985 | 6.403324796 | 5.654889509 | 4.440454819 | 3.924153696 | 10.84156207  | 9.966155196 | 7.115492597 | 2.828471584 | 3.33330719  |
| ENSMUSG00000026664  | 0.287585353  | 4.166479059  | 0.949871283 | 0.329752063 | 0.999071534 | Phyh          | Phyh          | PHYH     | 16.70284798 | 13.69600026 | 18.31109993 | 17.62305506 | 16.87386089 | 17.24463228  | 20.3883245  | 31.01802112 | 11.5495923  | 13.92145944 |
| ENSMUSG00000039678  | -0.304117475 | 4.929906746  | 0.949770716 | 0.329777666 | 0.999071534 | Tbc1d13       | Tbc1d13       | TBC1D13  | 49.75764378 | 43.28173242 | 25.17776241 | 26.08767206 | 30.73920395 | 57.19105896  | 29.12188207 | 13.26383086 | 14.14235792 | 25.03248341 |
| ENSMUSG00000044629  | 0.596233782  | 0.65648034   | 0.949733599 | 0.329787117 | 0.999071534 | Cnrip1        | Cnrip1        | CNRI P1  | 0.912340436 | 0.592900444 | 1.077123525 | 1.734552664 | 1.63506404  | 1.018670261  | 2.459181152 | 0.759906976 | 1.885647722 | 2.091486864 |
| ENSMUSG00000028861  | 0.228073407  | 5.138186919  | 0.949422972 | 0.329866218 | 0.999071534 | Mrps15        | Mrps15        | MRRPS15  | 26.10697248 | 27.56987065 | 43.0176208  | 29.83430582 | 41.33441893 | 38.85499425  | 45.17127485 | 29.84361943 | 29.69895163 | 39.4114556  |
| ENSMUSG00000035772  | -0.239096856 | 4.590570953  | 0.949312307 | 0.329894406 | 0.999071534 | Mrps2         | Mrps2         | MRRPS2   | 26.52805268 | 24.07175803 | 26.72612748 | 25.18570468 | 32.37426799 | 32.88849701  | 21.67962332 | 18.03052007 | 12.17814154 | 24.50961169 |
| ENSMUSG00000028978  | -0.320750763 | 3.527398511  | 0.949291397 | 0.329899732 | 0.999071534 | Nos3          | Nos3          | NOS3     | 14.52726694 | 13.04380977 | 16.29149332 | 11.17051915 | 10.7260201  | 14.40690798  | 8.218842272 | 5.319348834 | 7.85686551  | 13.9868184  |
| ENSMUSG000000040298 | 0.928566607  | -0.652537516 | 0.948077686 | 0.330209089 | 0.999071534 | Btbd16        | Btbd16        | BTBD16   | 1.122880537 | 0.237160178 | 0.201960661 | 0.20814632  | 0.065402562 | 0.0727262162 | 0.517722348 | 0.621742072 | 0.707117896 | 1.176461361 |
| ENSMUSG00000030432  | 0.334084266  | 8.657118469  | 0.948066003 | 0.330212069 | 0.999071534 | Rpl28         | Rpl28         | RPL28    | 255.174602  | 288.6239362 | 516.0094889 | 391.4538451 | 395.8163028 | 242.0069492  | 267.3388774 | 523.161412  | 483.5900721 | 576.8582207 |
| ENSMUSG00000021639  | 0.283570544  | 4.091649344  | 0.946893654 | 0.330511253 | 0.999071534 | Gtf2h2        | Gtf2h2        | GTTF2H2C | 20.63292986 | 18.49849386 | 9.89607239  | 16.79046978 | 13.40752513 | 24.52084843  | 24.72124211 | 12.64208879 | 13.98522061 | 15.16327977 |
| ENSMUSG00000006345  | 0.586026042  | 1.413382895  | 0.946877259 | 0.33051544  | 0.999071534 | Ggt1          | Ggt1          | GGTLC2   | 3.789721811 | 3.260952442 | 0.471241542 | 1.387642131 | 1.700466601 | 2.546675653  | 0.841298815 | 4.62852431  | 2.985608894 | 3.398666154 |
| ENSMUSG00000037376  | 0.277494647  | 5.150916241  | 0.946829207 | 0.330527711 | 0.999071534 | Trmt6         | Trmt6         | TRMT6    | 46.2486421  | 39.25000094 | 29.35161607 | 25.25508678 | 26.74964769 | 58.86458867  | 60.31465352 | 22.38271458 | 23.88487115 | 27.64684199 |
| ENSMUSG00000022551  | 0.267015722  | 6.822148688  | 0.946677128 | 0.330566551 | 0.999071534 | Cyc1          | Cyc1          | CYC1     | 128.8505416 | 100.6744954 | 99.297325   | 89.36415324 | 116.1549494 | 150.8359608  | 204.4356121 | 69.28969975 | 94.12524881 | 84.77057696 |
| ENSMUSG00000034501  | 0.2705382    | 3.696519425  | 0.946229742 | 0.330680844 | 0.999071534 | Pcnx4         | Pcnx4         | PCNX4    | 11.5095255  | 14.8225111  | 11.51175768 | 9.574730704 | 13.14591488 | 15.86215121  | 16.50239984 | 11.12227484 | 10.92104306 | 13.72538255 |
| ENSMUSG00000066842  | 0.872820504  | 0.522474161  | 0.946030594 | 0.330731738 | 0.999071534 | Hmcn1         | Hmcn1         | HMCN1    | 0.771980369 | 0.415030311 | 1.144443746 | 1.942698983 | 0.457817931 | 2.619437815  | 2.912188207 | 0.138164905 | 2.514196963 | 0           |
| ENSMUSG00000082593  | 1.068511106  | -0.512721954 | 0.945571889 | 0.330849002 | 0.999071534 | Gm11331       | Gm11331       |          | 0.421080201 | 0.889350666 | 0           | 0.555056852 | 0           | 0.363810808  | 0.129430587 | 1.174401691 | 0.15713731  | 1.895409971 |
| ENSMUSG00000033970  | 0.240092296  | 5.694204066  | 0.945281053 | 0.33092338  | 0.999071534 | Rfc3          | Rfc3          | RFC3     | 56.7054671  | 34.03248549 | 57.96270971 | 48.84500301 | 48.13628533 | 55.73581573  | 85.61833327 | 38.54800844 | 41.95566182 | 49.01922338 |
| ENSMUSG00000052144  | 0.239313377  | 7.027151147  | 0.944849492 | 0.331033789 | 0.999071534 | Ppp4r2        | Ppp4r2        | PPP4R2   | 99.51528756 | 113.7183052 | 132.1495925 | 139.8743268 | 133.1596154 | 136.2835285  | 134.0253728 | 129.3914333 | 152.5803282 | 116.6003927 |
| ENSMUSG00000028378  | 0.232167957  | 5.824253524  | 0.943836157 | 0.331293229 | 0.999071534 | Ptgr1         | Ptgr1         | PTGR1    | 48.91548338 | 41.50303108 | 62.40584426 | 55.64444945 | 61.02058997 | 41.32890774  | 73.4518581  | 57.54568284 | 54.29094067 | 62.67924696 |
| ENSMUSG00000024007  | 0.280144019  | 5.360123528  | 0.943313373 | 0.331427181 | 0.999071534 | Ppil1         | Ppil1         | PPIL1    | 49.19620351 | 21.64086621 | 43.75814322 | 39.61718284 | 37.60647292 | 57.26382112  | 70.41023931 | 22.86629174 | 33.47024707 | 36.14350737 |
| ENSMUSG00000031872  | -0.49192933  | 1.513631212  | 0.943105567 | 0.331480447 | 0.999071534 | Bean1         | Bean1         | BEAN1    | 1.684320805 | 2.905212176 | 6.058819831 | 3.399723221 | 2.354492217 | 2.764962138  | 1.48845175  | 1.588896405 | 1.807079067 | 3.33330719  |
| ENSMUSG00000025027  | -0.215583964 | 5.615678466  | 0.942987224 | 0.331510786 | 0.999071534 | Xpnpep1       | Xpnpep1       | XPNPEP1  | 58.95122818 | 60.29797516 | 48.60519909 | 44.12701977 | 61.87082327 | 70.50653452  | 36.88771728 | 48.97945875 | 24.82769501 | 44.05194208 |
| ENSMUSG00000029705  | -0.200907285 | 5.972400448  | 0.942886498 | 0.331536612 | 0.999071534 | Cux1          | Cux1          | CUX1     | 64.28491072 | 78.32214866 | 69.47446739 | 58.62788003 | 77.95985342 | 83.82201007  | 50.21906774 | 58.51283718 | 44.07701551 | 49.47673613 |

|                     |              |              |             |             |             |          |          |          |             |              |             |              |             |             |             |             |             |             |
|---------------------|--------------|--------------|-------------|-------------|-------------|----------|----------|----------|-------------|--------------|-------------|--------------|-------------|-------------|-------------|-------------|-------------|-------------|
| ENSMUSG00000039062  | -0.344103249 | 4.030481103  | 0.942812528 | 0.33155558  | 0.999071534 | Anpep    | Anpep    | ANPEP    | 26.73859278 | 25.4947191   | 19.38822346 | 9.85225913   | 13.34212257 | 25.75780518 | 13.59021163 | 17.33969555 | 5.106962581 | 10.52279329 |
| ENSMUSG00000029298  | -0.263923337 | 5.566072407  | 0.942414605 | 0.33165764  | 0.999071534 | Gbp9     | Gbp9     | GBP6     | 56.77564714 | 60.53513534  | 47.3261149  | 51.20399463  | 51.92963391 | 44.45768069 | 18.63800452 | 54.98963211 | 30.17036356 | 59.21522184 |
| ENSMUSG000000031379 | -0.248698613 | 4.22845755   | 0.94224058  | 0.331702287 | 0.999071534 | Pir      | Pir      | PIR      | 20.77328993 | 21.46299608  | 19.92678522 | 22.06350988  | 20.53640434 | 14.91624311 | 21.67962332 | 13.95465538 | 14.29949523 | 16.66653595 |
| ENSMUSG00000028931  | -0.337467243 | 3.436515389  | 0.942131686 | 0.331730229 | 0.999071534 | Kcnab2   | Kcnab2   | KCNAB2   | 16.00104765 | 13.87387039  | 11.51175768 | 8.811527532  | 12.0994739  | 20.08235658 | 8.348272859 | 7.529987311 | 4.478413341 | 7.777716776 |
| ENSMUSG00000063838  | -0.288446793 | 3.996251001  | 0.942130824 | 0.33173045  | 0.999071534 | Cdc42ep5 | Cdc42ep5 | CDC42EP5 | 14.10618674 | 12.39161928  | 21.34050985 | 23.72868044  | 18.18191212 | 19.50025929 | 13.97850339 | 15.75079915 | 7.542590889 | 13.66002358 |
| ENSMUSG00000067825  | -0.370472697 | 2.577936244  | 0.941839908 | 0.331805113 | 0.999071534 | Pex26    | Pex26    | PEX26    | 8.140883891 | 8.063446039  | 7.607184899 | 4.787365352  | 5.690022859 | 7.057929668 | 6.342098761 | 5.664761096 | 2.749902928 | 3.33330719  |
| ENSMUSG00000064355  | 0.718216916  | 3.070597934  | 0.941225743 | 0.331962811 | 0.999071534 | mt-Tk    | mt-Tk    |          | 5.895122818 | 1.600831199  | 9.963392611 | 13.25198235  | 1.177246109 | 3.419821592 | 1.617882337 | 2.694215643 | 26.71334273 | 9.673126747 |
| ENSMUSG00000055850  | -0.192770559 | 5.648799641  | 0.940911889 | 0.332043437 | 0.999071534 | Rnf181   | Rnf181   | RNF181   | 48.84530335 | 62.13596654  | 53.72153583 | 52.52225466  | 59.97414898 | 55.08095627 | 41.87079488 | 49.53211837 | 33.86309035 | 46.86237755 |
| ENSMUSG00000037020  | 0.350985452  | 3.189547592  | 0.940587386 | 0.332126827 | 0.999071534 | Wdr62    | Wdr62    | WDR62    | 9.825204696 | 7.292675462  | 8.415027543 | 6.313771696  | 9.352566308 | 18.40882687 | 4.788931717 | 10.29328541 | 6.206923753 | 10.78422914 |
| ENSMUSG00000074570  | 0.590792429  | 0.67216908   | 0.940028038 | 0.332270631 | 0.999071534 | Cas4     | Cas4     | CAS4     | 1.263240604 | 1.48225111   | 0.471241542 | 0.8352585279 | 2.027479409 | 2.983248622 | 2.070898391 | 0.621742072 | 1.021392516 | 2.091486864 |
| ENSMUSG00000030268  | 0.881381178  | 0.872625637  | 0.939990598 | 0.33228026  | 0.999071534 | Bcat1    | Bcat1    | BCAT1    | 3.649361744 | 0.770770577  | 0.06732022  | 0.763203172  | 0.981038424 | 4.29296753  | 5.112508185 | 0.069082452 | 0.15713731  | 1.764692042 |
| ENSMUSG00000037902  | -0.258305533 | 7.121496601  | 0.939625023 | 0.332374295 | 0.999071534 | Sirpa    | Sirpa    | SIRPG    | 176.5729644 | 168.265146   | 155.1731079 | 150.6979354  | 136.0373281 | 228.4731872 | 146.9037162 | 88.77095133 | 64.34772853 | 111.5677524 |
| ENSMUSG00000047604  | -0.665550844 | 1.121596153  | 0.939520956 | 0.33240107  | 0.999071534 | Frat2    | Frat2    | FRAT2    | 4.982782381 | 2.54947191   | 1.750325729 | 2.705902155  | 0.981038424 | 2.40115133  | 1.035444696 | 2.556050739 | 0           | 1.960768935 |
| ENSMUSG00000019731  | -0.222745276 | 5.537650857  | 0.939374516 | 0.332438752 | 0.999071534 | Slc35e1  | Slc35e1  | SLC35E1  | 53.47718556 | 51.52304859  | 47.12415424 | 59.73799374  | 46.37041617 | 70.28824803 | 46.91858777 | 27.77114586 | 27.8133039  | 40.3264811  |
| ENSMUSG00000047379  | -0.21382719  | 5.504636018  | 0.938323008 | 0.332709495 | 0.999071534 | B3gnt1   | B4gat1   | B4GAT1   | 54.95096626 | 47.6691957   | 47.25879468 | 56.26888841  | 45.65098799 | 45.18530231 | 57.27303473 | 36.54461732 | 30.48463818 | 34.05202051 |
| ENSMUSG00000094090  | -0.438641313 | 2.574497834  | 0.938251225 | 0.332727988 | 0.999071534 | Gm8494   | Gm8494   |          | 4.421342113 | 13.10309981  | 5.049016526 | 2.775284262  | 9.744981678 | 4.656778337 | 7.701119924 | 4.283112048 | 3.457020824 | 3.790819941 |
| ENSMUSG00000041406  | 0.273870272  | 3.86892443   | 0.938205346 | 0.332739808 | 0.999071534 | BC055324 | BC055324 | C1orf112 | 11.22880537 | 12.98451973  | 17.50325729 | 13.39074656  | 12.81890207 | 18.62711335 | 18.76743511 | 10.56961522 | 11.94243557 | 17.32012559 |
| ENSMUSG00000020476  | -0.265109178 | 6.544986345  | 0.938196288 | 0.332742142 | 0.999071534 | Dbnl     | Dbnl     | DBNL     | 160.9228169 | 126.880695   | 76.94701185 | 87.49083636  | 78.15606111 | 134.0279015 | 103.2208931 | 48.97945875 | 58.14080477 | 76.6007064  |
| ENSMUSG00000003500  | -0.232706703 | 5.024199186  | 0.93752374  | 0.332915487 | 0.999071534 | Impdh1   | Impdh1   | IMPDH1   | 39.16045872 | 47.19487535  | 28.27449254 | 28.16913526  | 39.83016001 | 48.0230266  | 27.56871502 | 29.98178434 | 16.81369219 | 26.20894477 |
| ENSMUSG00000002064  | -0.227915485 | 6.531110958  | 0.937521267 | 0.332916125 | 0.999071534 | Sdf2     | Sdf2     | SDF2     | 115.5163352 | 100.5559153  | 81.32282617 | 123.5695318  | 94.63750663 | 70.21548587 | 106.7155189 | 82.69169552 | 60.81213905 | 88.5613969  |
| ENSMUSG00000022538  | 0.199034317  | 5.618263862  | 0.937189779 | 0.333001608 | 0.999071534 | Lsg1     | Lsg1     | LSG1     | 52.42448506 | 48.26209615  | 45.77774983 | 38.0907765   | 53.04147745 | 60.02878326 | 57.5318959  | 39.44608032 | 47.76974723 | 47.90812098 |
| ENSMUSG00000042410  | 0.242385764  | 5.900460826  | 0.93714113  | 0.333014156 | 0.999071534 | Agps     | Agps     | AGPS     | 71.30291408 | 66.28626965  | 47.59539578 | 47.94303563  | 51.21020573 | 105.1413234 | 87.43036149 | 41.7948837  | 42.50564241 | 45.09768551 |
| ENSMUSG00000003352  | -0.305731604 | 5.897774738  | 0.937078773 | 0.333030241 | 0.999071534 | Cacnb3   | Cacnb3   | CACNB3   | 50.10854395 | 78.32214866  | 65.77185527 | 64.94165173  | 82.40722761 | 42.20205368 | 20.25588686 | 86.42214794 | 37.39867983 | 67.77724619 |
| ENSMUSG00000046982  | 0.362065774  | 6.225696192  | 0.936779679 | 0.333107404 | 0.999071534 | Tshz1    | Tshz1    | TSHZ1    | 40.14297919 | 38.53852886  | 65.8986405  | 95.05348597  | 76.978815   | 65.12213456 | 28.21586796 | 83.52068494 | 121.4671408 | 88.69211483 |
| ENSMUSG00000034333  | 0.260090042  | 4.034557459  | 0.936589675 | 0.333156436 | 0.999071534 | Zbed4    | Zbed4    | ZBED4    | 13.54474647 | 16.36405226  | 16.2241731  | 11.17051915  | 19.81697616 | 25.17570789 | 15.14337867 | 17.13244819 | 15.08518178 | 13.9868184  |
| ENSMUSG000000559970 | -0.344591648 | 3.047373604  | 0.936528654 | 0.333172185 | 0.999071534 | Hspa2    | Hspa2    | HSPA2    | 7.860163757 | 9.367827016  | 11.17515658 | 7.423885401  | 11.51085084 | 8.222124252 | 3.688771728 | 8.566224097 | 6.206923753 | 7.843075741 |
| ENSMUSG00000025049  | 0.347514504  | 3.205979258  | 0.93592091  | 0.333329092 | 0.999071534 | Taf5     | Taf5     | TAF5     | 10.6673651  | 6.403324796  | 6.530061373 | 10.5460802   | 7.259684337 | 10.55051342 | 11.38989165 | 6.217420715 | 12.09957289 | 8.104511599 |
| ENSMUSG00000060475  | 0.212670454  | 6.55706304   | 0.935270642 | 0.333497087 | 0.999071534 | Wtap     | Wtap     | WTAP     | 100.0767278 | 73.6975252   | 94.45026914 | 86.79701529  | 97.44981678 | 110.2346747 | 130.4660317 | 79.51390271 | 76.13302679 | 93.7247551  |
| ENSMUSG00000025575  | -0.200910392 | 5.713988704  | 0.934888936 | 0.333595752 | 0.999071534 | Cant1    | Cant1    | CANT1    | 66.1095916  | 71.08876324  | 43.96010388 | 49.19191354  | 61.34760278 | 62.13888594 | 45.04184426 | 46.49249046 | 34.49163959 | 50.13032578 |
| ENSMUSG00000032714  | 0.209483009  | 5.83646468   | 0.934864566 | 0.333602053 | 0.999071534 | Syde1    | Syde1    | SYDE1    | 52.00340485 | 53.77607028  | 54.19277738 | 48.35932826  | 66.71061283 | 74.65397772 | 39.21746785 | 58.02926001 | 55.39090184 | 68.03868205 |
| ENSMUSG00000025277  | 0.396824973  | 2.312545511  | 0.934245402 | 0.333762184 | 0.999071534 | Abhd6    | Abhd6    | ABHD6    | 5.333682549 | 3.260952442  | 3.029409915 | 3.746633754  | 6.409451036 | 6.766881022 | 7.183397576 | 5.319348834 | 4.399844685 | 3.071871332 |
| ENSMUSG00000039158  | -0.40283863  | 3.127979251  | 0.934186294 | 0.333777477 | 0.999071534 | Akna     | Akna     | AKNA     | 13.33420637 | 15.05967128  | 4.173853661 | 8.533999106  | 10.00659192 | 15.64386473 | 5.630230533 | 4.62852431  | 3.614158135 | 8.300588492 |
| ENSMUSG00000029233  | -0.266932998 | 4.350714525  | 0.934096351 | 0.333800748 | 0.999071534 | Srd5a3   | Srd5a3   | SRD5A3   | 17.75554849 | 27.09555029  | 26.05292527 | 22.68794884  | 21.19042996 | 26.77647544 | 22.8444986  | 17.20153065 | 7.6997282   | 17.38548456 |
| ENSMUSG00000004667  | 0.240943517  | 6.994503324  | 0.9340374   | 0.333816002 | 0.999071534 | Polr2e   | Polr2e   | POLR2E   | 145.7639297 | 86.20772457  | 122.0515595 | 112.3990126  | 140.8117151 | 112.2720152 | 169.2952077 | 125.3155686 | 107.3247829 | 147.0576701 |
| ENSMUSG000000035847 | -0.237905365 | 6.58406395   | 0.933753472 | 0.333889483 | 0.999071534 | Ids      | Ids      | IDS      | 72.42579462 | 96.227747207 | 125.2829301 | 128.3568971  | 113.2118341 | 97.06472347 | 60.12050764 | 91.87966168 | 84.77557885 | 87.31957658 |
| ENSMUSG00000003279  | 0.587572548  | 1.193111252  | 0.933579139 | 0.333934612 | 0.999071534 | Dlgap1   | Dlgap1   | DLGAP1   | 2.035220973 | 1.422961066  | 2.558168373 | 1.873316877  | 1.046440986 | 1.091432423 | 0.776583522 | 5.664761096 | 2.435628308 | 2.091486864 |
| ENSMUSG00000024050  | 0.262144947  | 6.150803132  | 0.933455862 | 0.333966529 | 0.999071534 | Wiz      | Wiz      | WIZ      | 48.56458321 | 44.58611339  | 92.29602209 | 74.79391086  | 73.12006386 | 77.20065338 | 46.91858777 | 75.43803801 | 80.8471461  | 87.12349968 |
| ENSMUSG00000046341  | 1.368269563  | -0.324037401 | 0.93318607  | 0.334036393 | 0.999071534 | Gm11223  | Gm11223  |          | 1.263240604 | 0.652190488  | 0           | 0            | 0           | 2.764962138 | 1.48845175  | 0.828989429 | 0           | 0           |
| ENSMUSG00000042699  | 0.23501788   | 6.456088346  | 0.932796012 | 0.334137436 | 0.999071534 | Dhx9     | Dhx9     | DHX9     | 82.11063924 | 98.89579407  | 77.62021405 | 67.64755389  | 93.19865027 | 168.5899282 | 65.36244641 | 67.63172089 | 81.23998937 | 86.86206383 |

|                     |              |              |             |             |             |               |            |           |             |             |             |             |             |             |             |             |             |             |
|---------------------|--------------|--------------|-------------|-------------|-------------|---------------|------------|-----------|-------------|-------------|-------------|-------------|-------------|-------------|-------------|-------------|-------------|-------------|
| ENSMUSG00000026494  | -0.325161983 | 5.293277968  | 0.932790432 | 0.334138881 | 0.999071534 | Klf26b        | Klf26b     | KIF26B    | 27.93165335 | 46.89842513 | 48.67251931 | 51.48152306 | 49.77134937 | 32.01535107 | 10.16030108 | 47.5978097  | 27.26332332 | 49.01922338 |
| ENSMUSG00000086784  | -0.257304729 | 4.070485923  | 0.932068588 | 0.33432598  | 0.999071534 | Isoc2a        | Isoc2a     | ISOC2     | 20.56274983 | 15.94902195 | 18.04181905 | 17.55367296 | 22.3022735  | 20.95550252 | 19.09101158 | 13.81649048 | 8.721120716 | 12.48356222 |
| ENSMUSG000000022440 | -0.217161065 | 5.984340095  | 0.931380308 | 0.33450451  | 0.999071534 | C1qtnf6       | C1qtnf6    | C1QTNF6   | 75.72425619 | 63.26247738 | 85.42935961 | 70.28407393 | 57.35804652 | 83.60372359 | 70.28080872 | 42.76203803 | 36.84869924 | 55.68583776 |
| ENSMUSG000000071478 | -1.573055268 | -0.934965387 | 0.931175158 | 0.334557747 | 0.999071534 | Hist1h2ad     | Hist1h2ad  | HIST1H2AB | 0           | 0           | 1.346404407 | 1.110113705 | 0.523220493 | 0           | 0           | 0.898071881 | 0           | 0           |
| ENSMUSG000000087590 | 0.325691752  | 4.575166067  | 0.930677261 | 0.334687001 | 0.999071534 | 2410004N09Rik | Epb4114aos |           | 18.73806896 | 21.28512594 | 27.19736902 | 24.07559097 | 17.46248395 | 11.13261071 | 17.79670571 | 32.60691753 | 31.34889338 | 28.49650852 |
| ENSMUSG000000026923 | -0.227469303 | 4.954003348  | 0.930561229 | 0.334717133 | 0.999071534 | Notch1        | Notch1     | NOTCH1    | 34.24785637 | 46.36481473 | 30.96730136 | 26.5039647  | 35.38278582 | 46.78606986 | 25.69197151 | 25.42234248 | 20.42785033 | 22.67956068 |
| ENSMUSG000000044288 | -0.259441223 | 4.310683546  | 0.930467008 | 0.334741603 | 0.999071534 | Cnr1          | Cnr1       | CNR1      | 14.17636678 | 24.48678834 | 26.65880726 | 25.04694046 | 20.6018069  | 16.58977283 | 19.60873392 | 14.23098519 | 15.63516236 | 19.93448417 |
| ENSMUSG000000021670 | 0.294824122  | 5.820563836  | 0.930084182 | 0.334841051 | 0.999071534 | Hmgcr         | Hmgcr      | HMGCR     | 68.77643287 | 46.66126495 | 41.94049727 | 49.19191354 | 56.96563115 | 95.31843159 | 110.0159989 | 27.70206341 | 35.19875748 | 42.41796796 |
| ENSMUSG000000022156 | -0.596440227 | 6.261133506  | 0.929996222 | 0.334863907 | 0.999071534 | Gzme          | Gzme       | GZMH      | 204.5747978 | 165.8342542 | 36.4202392  | 56.75456316 | 19.03214542 | 15.4983404  | 10.80745401 | 143.3460887 | 57.43368688 | 52.41788953 |
| ENSMUSG000000030199 | -0.247745593 | 4.860072186  | 0.92973306  | 0.334932299 | 0.999071534 | Etv6          | Etv6       | ETV6      | 22.8085109  | 34.92183616 | 40.66141309 | 31.98515112 | 32.24346287 | 42.71138881 | 17.08483748 | 29.08371246 | 17.99222202 | 24.05209894 |
| ENSMUSG000000035227 | 0.244156082  | 7.386268476  | 0.929415849 | 0.335014762 | 0.999071534 | Spcs2         | Spcs2      | SPCS2     | 153.4837334 | 146.7428599 | 155.2404281 | 164.0192999 | 174.4286318 | 163.4965769 | 236.0166753 | 149.0108498 | 169.944001  | 146.5347984 |
| ENSMUSG000000031671 | 0.335901586  | 3.327634478  | 0.929329762 | 0.335037147 | 0.999071534 | Setd6         | Setd6      | SETD6     | 10.0357448  | 5.454684085 | 12.2522801  | 6.660682229 | 11.24924059 | 15.86215121 | 11.13103048 | 5.802926001 | 9.428238612 | 11.9606905  |
| ENSMUSG000000026288 | -0.359397092 | 4.852924982  | 0.92906457  | 0.335106114 | 0.999071534 | Inpp5d        | Inpp5d     | INPP5D    | 46.66972231 | 54.42826077 | 22.8215547  | 16.30479504 | 29.23494503 | 58.79182651 | 24.98010328 | 12.08942917 | 10.21392516 | 24.44425272 |
| ENSMUSG000000040667 | 0.198680595  | 6.364688327  | 0.929044342 | 0.335111376 | 0.999071534 | Nup88         | Nup88      | NUP88     | 86.74252146 | 70.25870262 | 75.86988833 | 82.91161733 | 81.62239687 | 91.53479919 | 88.72466736 | 83.7279323  | 78.64722375 | 79.60721877 |
| ENSMUSG000000097487 | 0.274277357  | 4.358767192  | 0.929027815 | 0.335115674 | 0.999071534 | Ptges3l       | Ptges3l    | PTGES3L   | 23.58049127 | 16.71979252 | 17.16665619 | 18.45564034 | 19.94778129 | 13.82481069 | 23.55636683 | 18.92859196 | 26.16336215 | 21.56845829 |
| ENSMUSG000000034006 | -0.435980331 | 3.973700948  | 0.928922822 | 0.335142986 | 0.999071534 | Pqlc1         | Pqlc1      | PQLC1     | 20.49256979 | 19.86216488 | 17.16665619 | 19.0800793  | 16.28523784 | 25.39399437 | 20.70889391 | 10.63869767 | 1.021392516 | 10.71887018 |
| ENSMUSG000000097316 | 0.546671137  | 0.793205987  | 0.928904389 | 0.335147781 | 0.999071534 | Gm10516       | Gm10516    |           | 1.754500839 | 0.770770577 | 1.481044848 | 1.040731598 | 1.765869163 | 1.091432423 | 1.876743511 | 1.657978857 | 2.592765618 | 1.633974113 |
| ENSMUSG000000017737 | 0.813243421  | 7.045939157  | 0.928614019 | 0.33522333  | 0.999071534 | Mmp9          | Mmp9       | MMP9      | 368.3749961 | 30.00076247 | 45.57578917 | 21.2309246  | 41.53062661 | 200.896328  | 597.6457353 | 10.43145031 | 14.37806388 | 33.00627707 |
| ENSMUSG000000037070 | 0.235661586  | 6.814218979  | 0.928536805 | 0.335243424 | 0.999071534 | Rbmxl1        | Rbmxl1     | RBMX      | 102.1821288 | 82.88748208 | 125.9561323 | 116.8394674 | 106.5407728 | 128.7162637 | 138.037721  | 79.2375729  | 124.4527497 | 111.1102397 |
| ENSMUSG000000031066 | -0.293333932 | 4.048090322  | 0.92851618  | 0.335248792 | 0.999071534 | Usp11         | Usp11      | USP11     | 16.28176778 | 18.85423412 | 16.5607742  | 19.70451826 | 22.36767607 | 19.71854577 | 9.772009315 | 20.310241   | 6.285492408 | 16.92797181 |
| ENSMUSG000000025366 | -0.256569499 | 6.37608772   | 0.928394057 | 0.335280576 | 0.999071534 | Esy1          | Esy1       | ESYT1     | 116.9199359 | 114.785526  | 73.10975929 | 73.0593582  | 93.00244259 | 127.479307  | 92.67230026 | 70.25685408 | 31.19175607 | 59.73809356 |
| ENSMUSG000000020256 | -0.385785683 | 3.092953004  | 0.927835562 | 0.335425985 | 0.999071534 | Aldh1l2       | Aldh1l2    | ALDH1L2   | 5.824942784 | 17.43127306 | 8.818948865 | 7.354503294 | 10.07199449 | 9.022508029 | 7.312828163 | 9.947873145 | 2.514196963 | 7.25484506  |
| ENSMUSG000000001151 | 0.268191169  | 4.645929243  | 0.927654058 | 0.335473259 | 0.999071534 | Pcnt          | Pcnt       | PCNT      | 19.22932919 | 19.0913943  | 28.40913298 | 15.33344555 | 35.90600632 | 35.28964834 | 16.37296925 | 27.63298096 | 24.43485174 | 28.10435474 |
| ENSMUSG000000030323 | -0.290296388 | 3.83265691   | 0.926988795 | 0.335646609 | 0.999071534 | Ift122        | Ift122     | IFT122    | 19.15914916 | 21.64086621 | 11.37711724 | 12.76630761 | 16.02362759 | 16.95358363 | 9.966155196 | 13.33291331 | 6.756904338 | 15.68615148 |
| ENSMUSG000000027546 | -0.407187295 | 3.018694374  | 0.926921727 | 0.335664092 | 0.999071534 | Atp9a         | Atp9a      | ATP9A     | 9.544484562 | 9.96072746  | 13.59868451 | 9.435966491 | 4.447374189 | 15.4983404  | 5.241938772 | 3.039627905 | 4.635550651 | 6.470537486 |
| ENSMUSG000000023044 | -0.292535383 | 4.777329822  | 0.926742446 | 0.335710831 | 0.999071534 | Csad          | Csad       | CSAD      | 23.4401312  | 23.53814763 | 33.66011017 | 47.59612509 | 26.03021952 | 22.1196971  | 13.39606575 | 25.14601267 | 24.12057712 | 31.69909778 |
| ENSMUSG000000041229 | -0.231337544 | 4.484797131  | 0.926518157 | 0.335769317 | 0.999071534 | Phf8          | Phf8       | PHF8      | 23.51031124 | 29.22999189 | 24.63920065 | 22.47980252 | 25.04918109 | 29.39591325 | 14.81980221 | 21.13923043 | 14.29949523 | 21.04558657 |
| ENSMUSG000000049482 | 0.293710097  | 4.0708578    | 0.926008238 | 0.335902335 | 0.999071534 | Ctu2          | Ctu2       | CTU2      | 25.40517214 | 11.91729893 | 16.02221244 | 9.158438064 | 15.89282247 | 25.83056734 | 20.96775509 | 11.39860464 | 15.71373102 | 15.94758734 |
| ENSMUSG000000054874 | -0.208640358 | 5.738588116  | 0.925873127 | 0.335937591 | 0.999071534 | Pcnx3         | Pcnx3      | PCNX3     | 63.09185015 | 55.73264174 | 63.75224866 | 58.07282318 | 55.65757992 | 67.74157238 | 32.55179262 | 46.00891329 | 36.06301269 | 59.86881149 |
| ENSMUSG000000031865 | -0.253864867 | 5.957909561  | 0.925828886 | 0.335949137 | 0.999071534 | Dctn1         | Dctn1      | DCTN1     | 78.60163757 | 90.77305799 | 46.51827226 | 51.41214095 | 85.1541352  | 107.5424747 | 48.47175482 | 51.67367439 | 31.1138742  | 46.86237755 |
| ENSMUSG000000074922 | -0.380665744 | 2.408521946  | 0.925778338 | 0.335962329 | 0.999071534 | Fam122a       | Fam122a    | FAM122A   | 7.368903522 | 5.276813952 | 4.577774983 | 4.648601139 | 6.698540692 | 5.966497245 | 5.436084652 | 4.490359406 | 2.042785033 | 4.313691657 |
| ENSMUSG000000049409 | 0.822470342  | -0.188576007 | 0.925376864 | 0.336067132 | 0.999071534 | Prokr1        | Prokr1     | PROKR1    | 0.421080201 | 0.415030311 | 0.06732022  | 1.387642131 | 0.457817931 | 2.473913492 | 0.388291761 | 0.552659619 | 1.099961171 | 0.326794823 |
| ENSMUSG000000021903 | 0.49514647   | 1.904675912  | 0.925129564 | 0.336131711 | 0.999071534 | Galnt15       | Galnt15    | GALNT15   | 2.666841275 | 2.905212176 | 3.837252559 | 1.942698983 | 4.316569065 | 2.473913492 | 1.229590576 | 6.562832977 | 4.714119306 | 4.705845444 |
| ENSMUSG000000097226 | 0.874741062  | -0.38166493  | 0.925108977 | 0.336137088 | 0.999071534 | Gm26600       | Gm26600    |           | 1.052700503 | 0.118580089 | 0.471241542 | 0.277528426 | 0.457817931 | 0.291048646 | 0.064715293 | 0.690824524 | 1.099961171 | 1.699333077 |
| ENSMUSG000000071047 | 0.712797735  | 0.255749494  | 0.924931083 | 0.336183553 | 0.999071534 | Ces1a         | Ces1a      | Ces1a     | 0.491260235 | 1.185800888 | 0.471241542 | 1.248877918 | 0.719428178 | 1.164194584 | 0.582437641 | 2.279720929 | 0.15713731  | 2.287563758 |
| ENSMUSG000000096910 | 0.635120946  | 0.844012286  | 0.924728613 | 0.336236448 | 0.999071534 | Zfp955b       | Zfp955b    |           | 0.701800335 | 3.675982753 | 1.144443746 | 0.832585279 | 0.39241537  | 2.40115133  | 3.365195261 | 1.174401691 | 1.885647722 | 0.980384468 |
| ENSMUSG000000025907 | 0.216351671  | 5.849236027  | 0.924639029 | 0.336259856 | 0.999071534 | Rb1cc1        | Rb1cc1     | RB1CC1    | 45.33630167 | 60.41655525 | 52.44245165 | 50.8570841  | 67.49544357 | 61.48402649 | 47.69517129 | 81.58637628 | 52.24815564 | 53.20219711 |
| ENSMUSG000000085008 | 0.88672351   | -0.150056694 | 0.923845148 | 0.336467383 | 0.999071534 | Gm13399       | Dbhos      |           | 0.421080201 | 0.059290044 | 0.269280881 | 1.526406344 | 0.457817931 | 0.654859454 | 0.258861174 | 2.417885834 | 0.15713731  | 1.372538255 |
| ENSMUSG000000022701 | 0.408500812  | 3.04387721   | 0.922923787 | 0.336708451 | 0.999071534 | 2610015P09Rik | Ccdc191    | CCDC191   | 5.895122818 | 5.336103997 | 8.616988204 | 9.991023343 | 6.082438228 | 6.621356699 | 3.429910554 | 8.842553906 | 11.70672961 | 12.48356222 |

|                     |              |              |             |             |             |               |               |         |             |             |             |             |             |             |             |              |              |             |
|---------------------|--------------|--------------|-------------|-------------|-------------|---------------|---------------|---------|-------------|-------------|-------------|-------------|-------------|-------------|-------------|--------------|--------------|-------------|
| ENSMUSG00000021222  | -0.329960298 | 3.128932556  | 0.922913383 | 0.336711174 | 0.999071534 | Dcaf4         | Dcaf4         | DCAF4   | 8.632144126 | 10.19788764 | 6.597381593 | 11.6561939  | 12.62269439 | 7.348978314 | 5.953807    | 9.049801264  | 6.442629718  | 7.777716776 |
| ENSMUSG00000035245  | 0.254234952  | 4.725788046  | 0.922840332 | 0.336730297 | 0.999071534 | Eogt          | Eogt          | EOGT    | 25.19463204 | 26.97697021 | 25.58168373 | 19.14946141 | 28.25390661 | 36.96317805 | 44.07111486 | 17.892335517 | 16.49941757  | 26.1435858  |
| ENSMUSG00000047866  | -0.224608992 | 5.401502434  | 0.922797875 | 0.336741413 | 0.999071534 | Lonp2         | Lonp2         | LONP2   | 48.49440318 | 65.51549907 | 38.7091267  | 37.60510175 | 46.23961105 | 44.60320501 | 52.54881831 | 31.7779281   | 23.64916518  | 37.84284045 |
| ENSMUSG00000059355  | -0.228735252 | 6.020581811  | 0.922784395 | 0.336744942 | 0.999071534 | BC056474      | Wdr83os       | WDR83OS | 87.09342163 | 48.08422601 | 79.77446111 | 76.04278878 | 71.55040239 | 72.25282639 | 74.55201809 | 49.0485412   | 32.99883514  | 64.96681072 |
| ENSMUSG00000025917  | 0.222682674  | 6.615785923  | 0.922437995 | 0.336835648 | 0.999071534 | Cops5         | Cops5         | COP55   | 123.2361389 | 79.38936946 | 80.04374199 | 88.80909638 | 98.69246545 | 100.5573072 | 141.6617774 | 93.81397035  | 73.22598655  | 101.3717539 |
| ENSMUSG00000026604  | 0.266098053  | 4.867108699  | 0.922372406 | 0.336852826 | 0.999071534 | Ptpn14        | Ptpn14        | PTPN14  | 20.49256979 | 38.24207864 | 23.36011646 | 21.09216039 | 34.27094228 | 34.34374024 | 17.02012219 | 39.92965748  | 26.08479349  | 35.3591998  |
| ENSMUSG00000022100  | 0.206988315  | 6.004279238  | 0.92234909  | 0.336858933 | 0.999071534 | Xpo7          | Xpo7          | XPO7    | 60.07410871 | 66.76059    | 63.41564756 | 50.37140935 | 68.93429992 | 94.95462079 | 72.4811287  | 51.74275684  | 63.1691987   | 51.76429989 |
| ENSMUSG00000031662  | -0.460897219 | 2.872048913  | 0.922220044 | 0.336892736 | 0.999071534 | Snx20         | Snx20         | SNX20   | 18.59770889 | 7.885575906 | 6.193460271 | 4.440454819 | 6.54025616  | 12.58785394 | 9.189571674 | 3.17779281   | 2.435628308  | 3.594743048 |
| ENSMUSG00000032387  | -0.225254024 | 5.075424953  | 0.920957365 | 0.337223725 | 0.999071534 | Rbpms2        | Rbpms2        | RBPMS2  | 35.23037684 | 35.39615651 | 47.52807556 | 34.82981749 | 34.79416277 | 47.36816715 | 23.03864448 | 22.03730231  | 28.28471584  | 30.84943125 |
| ENSMUSG00000006715  | 0.298261005  | 5.662486118  | 0.920815384 | 0.33726097  | 0.999071534 | Gmnn          | Gmnn          | GMNN    | 74.11011542 | 24.36820825 | 43.3542219  | 47.6655072  | 45.9780008  | 55.15371843 | 102.1854484 | 37.5808541   | 36.9272679   | 39.34609663 |
| ENSMUSG00000092203  | 0.229731184  | 6.412706513  | 0.920638803 | 0.337307299 | 0.999071534 | 1110038B12Rik | 1110038B12Rik |         | 86.32144126 | 72.68959444 | 89.19929195 | 85.20122684 | 72.26983056 | 65.41318321 | 77.52892159 | 100.3077209  | 83.04706844  | 108.1690863 |
| ENSMUSG00000055720  | -0.240862654 | 4.382242123  | 0.919642073 | 0.33756897  | 0.999071534 | Ubl7          | Ubl7          | UBL7    | 20.14166963 | 25.13897883 | 29.28429585 | 18.87193298 | 23.21790937 | 23.0656052  | 14.17264927 | 23.00445665  | 14.53520119  | 17.45084352 |
| ENSMUSG00000026519  | -0.205095344 | 6.192000335  | 0.919192433 | 0.337687102 | 0.999071534 | Tmem63a       | Tmem63a       | TMEM63A | 94.95358538 | 88.28287612 | 56.75094575 | 75.41834982 | 91.36737855 | 81.85743171 | 64.45643231 | 63.27952639  | 49.96966464  | 70.78375856 |
| ENSMUSG00000054871  | 0.265155252  | 3.935853878  | 0.919146332 | 0.337699217 | 0.999071534 | Tmem158       | Tmem158       | TMEM158 | 11.79024564 | 10.96865822 | 16.08953266 | 16.51294136 | 15.95822503 | 20.59169171 | 15.27280926 | 15.54355179  | 10.44963113  | 19.34625349 |
| ENSMUSG00000048376  | -0.216347751 | 6.664966339  | 0.918909849 | 0.337761373 | 0.999071534 | F2r           | F2r           | F2R     | 99.65564763 | 97.76928323 | 134.9770418 | 130.5771245 | 99.93511412 | 136.2835285 | 89.63068147 | 85.31682871  | 63.1691987   | 88.29996105 |
| ENSMUSG00000021785  | 0.226562963  | 4.900814633  | 0.918825829 | 0.33778346  | 0.999071534 | Ngly1         | Ngly1         | NGLY1   | 29.33525402 | 26.02832949 | 23.09083558 | 33.858468   | 29.56195784 | 29.90524839 | 38.05259257 | 24.93876531  | 30.01322625  | 30.39191849 |
| ENSMUSG00000005442  | -0.251363752 | 5.793423371  | 0.918762035 | 0.337800231 | 0.999071534 | Cic           | Cic           | CIC     | 72.00471441 | 79.74510973 | 44.56598587 | 43.22505238 | 74.7551279  | 76.47303176 | 29.25131265 | 60.37806339  | 29.54814342  | 54.70545329 |
| ENSMUSG000000025351 | 0.292443226  | 11.08712124  | 0.918157369 | 0.337959253 | 0.999071534 | Cd63          | Cd63          | CD63    | 1861.45521  | 2131.714257 | 1952.757631 | 2094.923325 | 2100.795681 | 1260.3134   | 2457.304409 | 3429.114772  | 1913.22532   | 2226.387767 |
| ENSMUSG000000081378 | -0.786731979 | 0.321385611  | 0.917671294 | 0.338087158 | 0.999071534 | Rps13-ps4     | Rps13-ps4     |         | 2.596661241 | 0.415030311 | 1.009803305 | 2.081463196 | 1.24264867  | 0.654859454 | 1.229590576 | 0.483577167  | 1.414235792  | 0           |
| ENSMUSG000000061411 | -0.388119677 | 2.704047025  | 0.917223877 | 0.338204949 | 0.999071534 | 8430427H17Rik | NoI4l         | NOL4L   | 7.71980369  | 6.877645151 | 6.328100712 | 8.464616999 | 8.109917638 | 10.69603774 | 5.75966112  | 5.941090906  | 1.649941757  | 4.117614764 |
| ENSMUSG00000049804  | -0.484898224 | 1.660694023  | 0.917133254 | 0.338228814 | 0.999071534 | Armxc4        | Armxc4        | ARMCX4  | 4.912602348 | 3.023792265 | 4.914376085 | 2.705902155 | 2.812310149 | 5.74821076  | 2.523896446 | 0.898071881  | 1.807079067  | 1.830051006 |
| ENSMUSG00000015882  | 0.254956425  | 4.220559301  | 0.917118881 | 0.338232599 | 0.999071534 | Lcorl         | Lcorl         | LCORL   | 16.42212785 | 20.45506532 | 16.02221244 | 16.44355925 | 18.31271725 | 19.50025929 | 18.57328923 | 26.38949681  | 17.6779474   | 14.1828953  |
| ENSMUSG00000000142  | -0.773557451 | -0.104289715 | 0.916321283 | 0.338442741 | 0.999071534 | Axin2         | Axin2         | AXIN2   | 0.701800335 | 1.067220799 | 1.077123525 | 1.873316877 | 0.39241537  | 0.582097292 | 1.164875283 | 0.552659619  | 0            | 0.588230681 |
| ENSMUSG00000020978  | 0.220439985  | 6.360848402  | 0.916182988 | 0.338479195 | 0.999071534 | Klhdc2        | Klhdc2        | KLHDC2  | 75.51371609 | 93.50040003 | 78.89929824 | 68.20261074 | 77.95985342 | 81.71190739 | 123.0884882 | 76.40519235  | 75.42590889  | 66.99293862 |
| ENSMUSG00000028613  | 0.274579222  | 4.274403124  | 0.916141839 | 0.338490043 | 0.999071534 | Lrp8          | Lrp8          | LRP8    | 20.77328993 | 12.80664959 | 23.42743668 | 14.57024238 | 18.96674286 | 34.19821592 | 27.37456914 | 14.23098519  | 12.72812213  | 16.53581802 |
| ENSMUSG000000083033 | -0.695238487 | 0.609315312  | 0.915907408 | 0.338551853 | 0.999071534 | Gm9083        | Gm9083        |         | 1.403600671 | 0.5336104   | 4.241173882 | 1.80393477  | 0.915635862 | 1.018670261 | 1.553167044 | 0.552659619  | 1.649941757  | 0.196076894 |
| ENSMUSG00000090946  | -0.214444473 | 4.797353838  | 0.915857157 | 0.338565104 | 0.999071534 | Ccdc71l       | Ccdc71l       | CCDC71L | 24.00157147 | 33.9139054  | 33.99671127 | 30.94441952 | 31.19702188 | 28.01343219 | 23.87994329 | 25.07693022  | 20.89926226  | 25.88214994 |
| ENSMUSG000000024130 | -0.244333447 | 4.748190922  | 0.915627763 | 0.338625604 | 0.999071534 | Abca3         | Abca3         | ABCA3   | 24.0717515  | 37.6491782  | 23.62939734 | 30.80565531 | 34.4017474  | 40.01918884 | 25.69197151 | 20.58657081  | 12.80669078  | 23.46386826 |
| ENSMUSG000000027194 | -0.268869352 | 4.054911516  | 0.915354987 | 0.338697564 | 0.999071534 | Ttc17         | Ttc17         | TTC17   | 18.66788892 | 26.02832949 | 14.13724627 | 13.59889288 | 21.58284533 | 16.88082147 | 12.10175988 | 17.89235517  | 9.663944577  | 16.27438216 |
| ENSMUSG00000092932  | 0.792780337  | 1.402266906  | 0.91525164  | 0.338724833 | 0.999071534 | Gm22906       | Gm22906       |         | 1.403600671 | 0.355740266 | 4.173853661 | 2.289609516 | 1.373453794 | 0.509335131 | 0.129430587 | 1.657978857  | 0.8092571475 | 3.398666154 |
| ENSMUSG000000041762 | 0.434717968  | 1.610160274  | 0.914835717 | 0.338834608 | 0.999071534 | Gpr155        | Gpr155        | GPRI55  | 2.17558104  | 3.142372354 | 2.01960661  | 2.358991623 | 3.204725518 | 5.093351307 | 3.947632902 | 2.141556024  | 1.807079067  | 3.725460977 |
| ENSMUSG000000057738 | -0.248322984 | 7.434768418  | 0.91461418  | 0.338893098 | 0.999071534 | Sptan1        | Sptan1        | SPTAN1  | 177.0642246 | 230.7568528 | 187.890735  | 157.2198534 | 224.7232016 | 237.2046466 | 106.7155189 | 177.1964904  | 96.95372039  | 164.2470778 |
| ENSMUSG000000042129 | -0.362707597 | 3.545526878  | 0.913833813 | 0.339099237 | 0.999071534 | Rassf4        | Rassf4        | RASSF4  | 17.54500839 | 18.0241735  | 9.694111729 | 9.227820171 | 13.34212257 | 24.66637276 | 7.571689337 | 8.013564478  | 4.556981996  | 7.385562989 |
| ENSMUSG000000019791 | 0.344196383  | 3.507930602  | 0.913597295 | 0.339161749 | 0.999071534 | Hint3         | Hint3         | HINT3   | 12.07096577 | 11.6208487  | 6.866662475 | 12.83568971 | 7.848307392 | 6.330308052 | 16.63183042 | 11.53676955  | 10.99961171  | 13.79074151 |
| ENSMUSG00000059588  | 0.349676246  | 3.194460866  | 0.913270334 | 0.339248189 | 0.999071534 | Calcl         | Calcl         | CALCL   | 7.509263589 | 11.38368853 | 8.953589305 | 6.175007483 | 7.259684337 | 13.97033501 | 16.43768454 | 6.493750525  | 6.678335683  | 6.339819557 |
| ENSMUSG00000040260  | -0.96393811  | -0.469354908 | 0.912915266 | 0.339342094 | 0.999071534 | Daam2         | Daam2         | DAAM2   | 1.543960738 | 0.355740266 | 0.269280881 | 0.832585279 | 1.046440986 | 0.654859454 | 0           | 0            | 0.31427462   | 0.980384468 |
| ENSMUSG00000015452  | -0.59084032  | 1.230137213  | 0.912231257 | 0.339523093 | 0.999071534 | Ager          | Ager          | AGER    | 1.754500839 | 0.474320355 | 4.106533441 | 4.856747458 | 2.419894779 | 1.819054038 | 0.711868228 | 2.763298096  | 1.414235792  | 1.764692042 |
| ENSMUSG00000027763  | 0.303330829  | 8.235080424  | 0.912091747 | 0.339560025 | 0.999071534 | Mbnl1         | Mbnl1         | MBNL1   | 200.7148959 | 195.8943067 | 76.8585935  | 327.8304534 | 290.9759965 | 290.0299758 | 244.3002329 | 303.0647187  | 433.8561135  | 280.7167525 |
| ENSMUSG00000037805  | 0.291540175  | 8.660637259  | 0.910874319 | 0.339882543 | 0.999071534 | Rpl10a        | Rpl10a        |         | 367.6731957 | 272.2598839 | 427.2141183 | 490.8784038 | 317.7910468 | 286.5373921 | 436.3752239 | 399.2965748  | 511.403376   | 443.1337793 |

|                     |              |              |             |             |             |               |               |                |             |             |             |             |             |             |             |             |             |             |
|---------------------|--------------|--------------|-------------|-------------|-------------|---------------|---------------|----------------|-------------|-------------|-------------|-------------|-------------|-------------|-------------|-------------|-------------|-------------|
| ENSMUSG00000029004  | 0.395980846  | 6.798642895  | 0.910856246 | 0.339887333 | 0.999071534 | Kmt2e         | Kmt2e         | KMT2E          | 45.89774194 | 86.44488475 | 126.9659356 | 123.4307676 | 112.5578085 | 63.23031836 | 33.84609849 | 178.6472219 | 162.3228414 | 140.5217737 |
| ENSMUSG000000053964 | 0.594469513  | 1.459560805  | 0.910491331 | 0.339984088 | 0.999071534 | Lgalb4        | Lgalb4        | LGAL54         | 3.579181711 | 2.193731643 | 1.817645949 | 0.346910533 | 3.073920395 | 1.45524323  | 0.970729402 | 4.62852431  | 2.435628308 | 5.359435089 |
| ENSMUSG000000073437 | 0.504644787  | 1.546879192  | 0.910390868 | 0.340010731 | 0.999071534 | D330041H03Rik | D330041H03Rik |                | 2.596661241 | 1.363671021 | 2.827449254 | 2.705902155 | 2.485297341 | 1.600767553 | 1.68259763  | 2.486968286 | 4.399844685 | 4.967281302 |
| ENSMUSG000000082900 | -0.529895096 | 1.470381416  | 0.910072428 | 0.340095202 | 0.999071534 | Gm11557       | Gm11557       |                | 1.473780704 | 4.150303108 | 5.318297407 | 2.636520049 | 2.550699902 | 1.382481069 | 1.423736457 | 3.730452429 | 2.514196963 | 0.980384468 |
| ENSMUSG000000448895 | 0.54841484   | 1.394765323  | 0.910057099 | 0.340099269 | 0.999071534 | Cdk5r1        | Cdk5r1        | CDK5R1         | 1.754500839 | 2.075151554 | 0.605881983 | 3.399723221 | 2.616102464 | 3.419821592 | 1.29430587  | 1.657978857 | 2.199922343 | 5.882306805 |
| ENSMUSG00000036580  | -0.245309536 | 4.980235461  | 0.909835093 | 0.340158177 | 0.999071534 | Spg20         | Spg20         | SPG20          | 29.26507399 | 39.01284922 | 32.31370576 | 30.87503741 | 45.9780008  | 37.90908615 | 15.98467749 | 35.30113317 | 18.38506529 | 33.46378983 |
| ENSMUSG00000039231  | 0.22599453   | 5.626986355  | 0.909294717 | 0.34030162  | 0.999071534 | Suv39h1       | Suv39h1       | SUV39H1        | 46.59954227 | 40.13936006 | 52.50977187 | 44.26578398 | 52.51825696 | 92.69899378 | 63.42098761 | 37.4426892  | 31.27032473 | 41.89509625 |
| ENSMUSG00000050953  | 0.356698625  | 10.14844469  | 0.907797629 | 0.340699448 | 0.999071534 | Gja1          | Gja1          | GJA1           | 727.0651475 | 1336.456891 | 776.2694608 | 889.2010775 | 1455.534008 | 574.6027895 | 1031.044056 | 2428.939026 | 834.1634112 | 1141.82111  |
| ENSMUSG000000025350 | 0.270313526  | 4.58199993   | 0.907770349 | 0.340706704 | 0.999071534 | Rdh5          | Rdh5          | RDH5           | 27.30003305 | 21.58157616 | 21.74443117 | 16.85985189 | 25.11458365 | 13.82481069 | 29.96318088 | 27.4257336  | 22.78490998 | 28.69258542 |
| ENSMUSG000000086105 | 1.245061711  | -0.913490736 | 0.907715808 | 0.340721209 | 0.999071534 | Gm11636       | Gm11636       |                | 0           | 0           | 0.673202203 | 0.555056852 | 0           | 0.072762162 | 0.064715293 | 0.345412262 | 1.021392516 | 1.111102397 |
| ENSMUSG000000024165 | 0.336052221  | 5.484197896  | 0.9074999   | 0.34077864  | 0.999071534 | Hn1l          | Hn1l          | HN1L           | 54.10880586 | 36.99698771 | 38.43984582 | 24.70002993 | 52.25664672 | 106.5238045 | 75.58746278 | 18.8595095  | 24.04200846 | 30.71871332 |
| ENSMUSG000000042729 | 0.220724329  | 5.20616907   | 0.907467085 | 0.34078737  | 0.999071534 | Wdr74         | Wdr74         | WDR74          | 35.93217717 | 25.96903945 | 41.73853661 | 39.40903652 | 32.76668336 | 49.9148428  | 44.97712897 | 26.25133191 | 31.42746204 | 40.58791696 |
| ENSMUSG00000059824  | -0.349267875 | 4.343886852  | 0.907368976 | 0.340813472 | 0.999071534 | Dbp           | Dbp           | DBP            | 13.26402634 | 23.3602775  | 24.10063888 | 34.48290695 | 20.92881971 | 15.1345296  | 5.953807    | 25.07693022 | 19.40645781 | 17.77763835 |
| ENSMUSG000000025722 | -0.25729191  | 3.915725002  | 0.907059312 | 0.340895875 | 0.999071534 | Wdr73         | Wdr73         | WDR73          | 18.38716879 | 16.71979252 | 18.04181905 | 17.41490874 | 13.86534306 | 17.46291877 | 16.56711513 | 10.22420295 | 10.05678785 | 12.35284429 |
| ENSMUSG000000054555 | 0.225687091  | 6.210404135  | 0.906530524 | 0.341036652 | 0.999071534 | Adam12        | Adam12        | ADAM12         | 61.05662918 | 85.79269426 | 87.0450449  | 45.44527979 | 76.06317914 | 129.8804583 | 78.69379687 | 63.76310356 | 56.80513764 | 66.33934897 |
| ENSMUSG000000006576 | 0.406956924  | 3.158004648  | 0.906355523 | 0.341083259 | 0.999071534 | Slc4a3        | Slc4a3        | SLC4A3         | 5.965302851 | 7.411255551 | 9.020909526 | 7.493267507 | 9.352566308 | 6.985167506 | 3.365195261 | 12.43484143 | 6.442629718 | 18.75802281 |
| ENSMUSG000000071415 | 0.295978907  | 9.391719186  | 0.906101722 | 0.341150867 | 0.999071534 | Rpl23         | Rpl23         | RPL23          | 437.5023291 | 584.0069374 | 777.0099832 | 664.819345  | 657.0995364 | 420.0559585 | 572.665632  | 841.9078473 | 745.2236936 | 881.0388415 |
| ENSMUSG000000019461 | -0.210372581 | 6.407728512  | 0.905742073 | 0.341246702 | 0.999071534 | Plscr3        | Plscr3        | TMEM256-PLSCR3 | 93.83070485 | 85.43695399 | 103.4711787 | 93.38831541 | 95.61854505 | 100.0479721 | 50.80150538 | 83.38252004 | 63.71917928 | 83.98626939 |
| ENSMUSG000000027358 | -0.356186358 | 2.40581434   | 0.905665194 | 0.341267192 | 0.999071534 | Bmp2          | Bmp2          | BMP2           | 5.54422265  | 5.929004441 | 7.80914556  | 4.717983245 | 6.14784079  | 6.184783729 | 3.688771728 | 4.973936572 | 3.378452169 | 3.92153787  |
| ENSMUSG000000060862 | -0.292029283 | 3.588856357  | 0.905319242 | 0.341359419 | 0.999071534 | Zbtb40        | Zbtb40        | ZBTB40         | 14.38690688 | 12.92522968 | 13.53136429 | 14.57024238 | 12.4264867  | 12.2968053  | 7.053966989 | 7.806317121 | 11.39245499 | 12.67963911 |
| ENSMUSG000000020706 | 0.24681638   | 5.699055699  | 0.905247968 | 0.341378425 | 0.999071534 | Ftsj3         | Ftsj3         | FTSJ3          | 57.47744747 | 55.02116121 | 42.88298036 | 39.75594705 | 51.86423135 | 104.2681775 | 62.45025821 | 27.49481605 | 37.39867983 | 51.17606921 |
| ENSMUSG000000082530 | 0.73718487   | 2.028811625  | 0.90524284  | 0.341379792 | 0.999071534 | Gm12168       | Gm12168       |                | 6.526743119 | 4.861783641 | 1.144443746 | 0.971349492 | 2.027479409 | 4.656778337 | 12.68419752 | 5.112101477 | 0           | 2.222204793 |
| ENSMUSG000000038271 | -0.478194076 | 1.921586091  | 0.904823335 | 0.341491682 | 0.999071534 | Iffo1         | Iffo1         | IFFO1          | 7.439083555 | 3.853852886 | 3.702612119 | 3.885397967 | 3.27012808  | 4.656778337 | 2.459181152 | 2.417885834 | 4.242707375 | 0.849666539 |
| ENSMUSG000000003099 | 0.25442015   | 5.268310273  | 0.904294293 | 0.341632857 | 0.999071534 | Ppp5c         | Ppp5c         | PPP5C          | 52.14376492 | 37.88633838 | 27.39932968 | 26.71211102 | 38.84912159 | 68.03262102 | 55.91401357 | 26.59674417 | 27.89187256 | 29.73832885 |
| ENSMUSG000000058317 | -0.266628626 | 4.526003169  | 0.904268609 | 0.341639713 | 0.999071534 | Ube2e2        | Ube2e2        | UBE2E2         | 18.10644865 | 27.09555029 | 25.71632417 | 31.22194795 | 27.0766605  | 14.91624311 | 16.63183042 | 19.61941648 | 21.76351746 | 24.90176548 |
| ENSMUSG000000003039 | -0.209053364 | 6.186456151  | 0.903885098 | 0.341742105 | 0.999071534 | Fam32a        | Fam32a        | FAM32A         | 89.1286426  | 83.1839323  | 67.99342255 | 78.60992672 | 86.20057618 | 77.05512905 | 90.86027204 | 51.74275684 | 44.6269961  | 65.3589645  |
| ENSMUSG000000074746 | 0.194719847  | 5.335415371  | 0.903781377 | 0.341769804 | 0.999071534 | Pdzd8         | Pdzd8         | PDZD8          | 35.30055687 | 36.70053749 | 36.4202392  | 39.96409337 | 46.37041617 | 52.60704278 | 42.25908664 | 37.37360675 | 36.77013059 | 39.28073767 |
| ENSMUSG000000037007 | 0.310796296  | 3.827164942  | 0.903728584 | 0.341783904 | 0.999071534 | Zfp113        | Zfp113        | ZNF3           | 12.00078574 | 8.834216617 | 16.42613376 | 12.97445392 | 14.84638148 | 12.58785394 | 9.836724609 | 13.12566595 | 19.32788915 | 17.97371524 |
| ENSMUSG000000049538 | 0.675572512  | 0.449791756  | 0.903160752 | 0.341935609 | 0.999071534 | Adamts16      | Adamts16      | ADAMTS16       | 1.403600671 | 1.067220799 | 1.144443746 | 0.624438959 | 0.719428178 | 0.145524323 | 2.006174098 | 2.970545453 | 0.942823861 | 1.045743432 |
| ENSMUSG000000023330 | 0.26699303   | 4.030843076  | 0.902901896 | 0.342004796 | 0.999071534 | Dtwd1         | Dtwd1         | DTWD1          | 16.56248792 | 11.91729893 | 15.887572   | 15.61097397 | 16.41604296 | 19.35473496 | 26.20969386 | 14.09282029 | 10.37106247 | 16.66653595 |
| ENSMUSG000000030254 | 0.326935692  | 4.048110059  | 0.902897809 | 0.342005889 | 0.999071534 | Rad18         | Rad18         | RAD18          | 20.42238976 | 14.70393101 | 18.24377971 | 10.12978756 | 12.4264867  | 33.17954565 | 26.20969386 | 10.29328541 | 12.96382809 | 8.823460208 |
| ENSMUSG000000048277 | -0.214895093 | 6.410706506  | 0.902693025 | 0.342060637 | 0.999071534 | Syngt2        | Syngt2        | SYNGR2         | 93.05872448 | 67.2942004  | 107.5103919 | 95.74730704 | 109.8763035 | 105.5778964 | 86.91263914 | 73.78005916 | 45.33411399 | 76.73142433 |
| ENSMUSG000000067336 | -0.214559524 | 6.29599822   | 0.902561377 | 0.342095839 | 0.999071534 | Bmpr2         | Bmpr2         | BMPR2          | 62.67076995 | 91.95885888 | 101.9901338 | 85.13184474 | 95.16072712 | 88.1149776  | 51.38394302 | 79.03032554 | 62.54064946 | 70.06480995 |
| ENSMUSG000000047747 | -0.479426054 | 1.923305352  | 0.902338013 | 0.342155577 | 0.999071534 | Rnf150        | Rnf150        | RNF150         | 5.474042616 | 7.351965506 | 1.413724627 | 4.232308499 | 3.662543449 | 5.74821076  | 3.818202315 | 1.4507315   | 1.807079067 | 2.548999616 |
| ENSMUSG000000086859 | 0.378293668  | 4.720229039  | 0.902118459 | 0.342214309 | 0.999071534 | 281008D09Rik  | Snhg20        |                | 29.33525402 | 8.834216617 | 32.98690797 | 30.04245214 | 16.41604296 | 21.46483765 | 13.13720458 | 19.61941648 | 40.0700141  | 43.13691657 |
| ENSMUSG000000025145 | 0.260716732  | 4.494367727  | 0.901497112 | 0.342380595 | 0.999071534 | Lrrc45        | Lrrc45        | LRRC45         | 28.14219345 | 21.7594463  | 17.30129663 | 17.13738032 | 21.90985813 | 23.72046466 | 13.71964222 | 24.45518815 | 24.90626367 | 29.34617506 |
| ENSMUSG000000070699 | 0.345523597  | 2.73800505   | 0.901385511 | 0.342410476 | 0.999071534 | Sars2         | Sars2         | CTC-360G5.8    | 6.73728322  | 4.743203553 | 5.049016526 | 6.730064335 | 6.605658721 | 7.421740475 | 6.536244641 | 5.250266382 | 8.32827744  | 7.25484506  |
| ENSMUSG000000029036 | 0.217665921  | 5.797796077  | 0.900870707 | 0.34254835  | 0.999071534 | Atad3a        | Atad3a        | ATAD3A         | 66.5306718  | 41.14729082 | 62.80976558 | 46.06971875 | 50.29456987 | 86.29592357 | 69.63365578 | 38.13351372 | 46.98405575 | 52.35253057 |
| ENSMUSG000000001418 | -0.232585004 | 6.860335802  | 0.90057026  | 0.34262885  | 0.999071534 | 0610031J06Rik | Gimp          | GLMP           | 111.3757132 | 145.8535092 | 122.9940426 | 128.5650434 | 141.9889612 | 94.88185863 | 76.62290748 | 141.549945  | 84.46130423 | 113.0056496 |

|                    |              |              |             |             |             |               |           |         |             |             |             |             |             |             |             |             |             |             |
|--------------------|--------------|--------------|-------------|-------------|-------------|---------------|-----------|---------|-------------|-------------|-------------|-------------|-------------|-------------|-------------|-------------|-------------|-------------|
| ENSMUSG00000028096 | 0.251726163  | 4.080817139  | 0.900426265 | 0.34266744  | 0.999071534 | Gpr89         | Gpr89     | GPR89A  | 17.40464832 | 15.65257172 | 17.77253817 | 11.44804758 | 17.65869163 | 22.84731872 | 22.39149154 | 13.60924312 | 11.39245499 | 19.47697142 |
| ENSMUSG00000030059 | 0.20939694   | 5.583615258  | 0.900137607 | 0.342744816 | 0.999071534 | Tmf1          | Tmf1      | TMF1    | 41.19567969 | 47.96564593 | 46.85487336 | 46.83292192 | 47.08984435 | 47.6592158  | 52.74296419 | 44.07460463 | 56.64800033 | 41.63366039 |
| ENSMUSG00000051527 | 0.787606006  | 0.421942565  | 0.900114621 | 0.342750979 | 0.999071534 | Usp29         | Usp29     | USP29   | 0.631620302 | 0.770770577 | 1.548365068 | 1.387642131 | 0.261610246 | 0.145524323 | 0.19414588  | 1.381649048 | 2.592765618 | 2.61435858  |
| ENSMUSG00000032423 | 0.239933339  | 7.484061443  | 0.899103372 | 0.343022244 | 0.999071534 | Syncrip       | Syncrip   | SYNCRIP | 138.6757463 | 161.0317606 | 190.9874651 | 175.6061117 | 183.9120032 | 296.1419974 | 191.2984075 | 149.5635094 | 166.8012548 | 146.9923112 |
| ENSMUSG00000001741 | -0.360577156 | 2.746752288  | 0.897936419 | 0.343335636 | 0.999071534 | Il16          | Il16      | IL16    | 6.105662918 | 9.071376794 | 6.395420932 | 10.3793388  | 6.213243352 | 9.313556675 | 3.688771728 | 4.352194501 | 4.32127603  | 6.797332309 |
| ENSMUSG00000083120 | 0.598581494  | 2.629355311  | 0.897881569 | 0.343350376 | 0.999071534 | Gm15854       | Gm15854   |         | 11.2989854  | 5.217523908 | 2.625488593 | 0.971349492 | 5.297607489 | 6.330308052 | 21.74433861 | 2.694215643 | 2.121353688 | 3.202589261 |
| ENSMUSG00000028069 | 0.286298209  | 5.232221099  | 0.897747647 | 0.343386368 | 0.999071534 | Gpatch4       | Gpatch4   | GPATCH4 | 30.87921476 | 20.51435536 | 49.54768217 | 34.89919959 | 39.04532927 | 51.95218333 | 26.14497857 | 21.20831288 | 47.14119306 | 50.84927438 |
| ENSMUSG00000062691 | 0.269221722  | 4.510545753  | 0.897623067 | 0.343419855 | 0.999071534 | 1110001A16Rik | Cebpz     | CEBPZOS | 19.72058943 | 14.58535092 | 22.88887492 | 26.36520049 | 22.62928631 | 15.28005392 | 29.51017383 | 25.21509512 | 23.41345922 | 23.26779136 |
| ENSMUSG00000037071 | -0.245956217 | 5.722978193  | 0.897586825 | 0.343429597 | 0.999071534 | Scd1          | Scd1      | SCD     | 45.33630167 | 98.36218367 | 41.94049727 | 61.05625376 | 49.64054425 | 51.4428482  | 36.6935714  | 53.4007357  | 46.04123189 | 43.07155761 |
| ENSMUSG00000027469 | 0.242099269  | 6.228786622  | 0.897054322 | 0.343572786 | 0.999071534 | Tpx2          | Tpx2      | TPX2    | 80.35613841 | 48.79570655 | 87.78556733 | 57.1708558  | 83.06125323 | 139.4850636 | 87.23621561 | 47.87413951 | 61.28355098 | 67.90796412 |
| ENSMUSG00000002957 | -0.220433366 | 6.879681916  | 0.896436412 | 0.343739041 | 0.999071534 | Ap2a2         | Ap2a2     | AP2A2   | 154.2557137 | 146.5056997 | 107.241111  | 119.7535159 | 130.8051232 | 177.5396741 | 103.2208931 | 96.37002109 | 68.82614187 | 95.16265232 |
| ENSMUSG00000027384 | 0.295185752  | 4.228404244  | 0.896065706 | 0.343838835 | 0.999071534 | Ndufa5        | Ndufa5    | NDUFAF5 | 23.2295911  | 16.60121243 | 12.72352164 | 17.20676242 | 17.13547114 | 15.64386473 | 36.04641847 | 13.40199576 | 15.32088774 | 18.10443317 |
| ENSMUSG00000027881 | 0.214283568  | 6.580964678  | 0.895791324 | 0.343912724 | 0.999071534 | Prpf38b       | Prpf38b   | PRPF38B | 70.46075368 | 95.16052127 | 107.3084312 | 82.6340889  | 104.1208781 | 114.7459287 | 75.65217808 | 99.5478139  | 85.48269675 | 120.4565716 |
| ENSMUSG00000024143 | -0.221004645 | 6.176168408  | 0.895285104 | 0.344049102 | 0.999071534 | Rhoq          | Rhoq      | RHOQ    | 64.84635099 | 88.10500599 | 84.01563499 | 83.6748205  | 81.94940968 | 70.65205884 | 49.31305363 | 92.15599149 | 52.40529295 | 56.47014533 |
| ENSMUSG00000040537 | 0.530023028  | 1.147621184  | 0.895134335 | 0.344089734 | 0.999071534 | Adam22        | Adam22    | ADAM22  | 0.771980369 | 1.778701332 | 1.88496617  | 2.289609516 | 2.092881971 | 1.236956746 | 2.523896446 | 1.243484143 | 3.299883514 | 3.137230296 |
| ENSMUSG00000027340 | -0.300780172 | 4.472521334  | 0.894937406 | 0.344142816 | 0.999071534 | Slc23a2       | Slc23a2   | SLC23A2 | 22.52779077 | 43.57818264 | 23.4947569  | 14.36209606 | 23.28331193 | 29.6869619  | 18.8321504  | 24.86968286 | 7.6997282   | 17.7763835  |
| ENSMUSG00000073591 | -0.367664917 | 3.048540922  | 0.894356551 | 0.344299448 | 0.999071534 | Pcdhb22       | Pcdhb22   | PCDHB15 | 7.789983723 | 6.04758453  | 12.92548231 | 14.63962448 | 5.624620297 | 6.839643183 | 5.436084652 | 7.253657501 | 6.049786443 | 8.496665386 |
| ENSMUSG00000062590 | 0.271941437  | 3.56208096   | 0.894201133 | 0.344341374 | 0.999071534 | Armcc9        | Armcc9    | ARMCC9  | 10.52700503 | 12.33232924 | 9.155549966 | 9.227820171 | 13.86534306 | 15.42557824 | 12.23119047 | 13.26383086 | 9.349669957 | 11.9606905  |
| ENSMUSG00000001018 | 0.222587333  | 5.48610653   | 0.894137291 | 0.344358599 | 0.999071534 | Snapin        | Snapin    | SNAPIN  | 34.45839647 | 38.06420851 | 39.24768846 | 47.17983245 | 54.87274918 | 44.38491853 | 42.25908664 | 62.1051247  | 31.89887397 | 51.56822299 |
| ENSMUSG00000042462 | 0.276976258  | 5.731491143  | 0.89400203  | 0.344395095 | 0.999071534 | Dctpp1        | Dctpp1    | DCTPP1  | 58.67050804 | 22.94524719 | 59.17447368 | 58.41973371 | 48.65950583 | 62.06612378 | 77.27006041 | 31.08710358 | 59.63360922 | 48.16955684 |
| ENSMUSG00000018841 | -0.30158034  | 3.162487744  | 0.893904738 | 0.34442135  | 0.999071534 | Rad51d        | Rad51d    | RAD51D  | 10.31646493 | 10.61291795 | 10.97319592 | 8.533999106 | 10.20279961 | 10.25946477 | 8.607134033 | 5.526596192 | 5.735511822 | 8.56202435  |
| ENSMUSG00000061684 | -0.649373259 | 2.050723578  | 0.892925425 | 0.344685775 | 0.999071534 | Rpl21-ps8     | Rpl21-ps8 |         | 5.824942784 | 4.861783641 | 1.750325729 | 7.493267507 | 5.297607489 | 2.910486461 | 7.24811287  | 4.006782239 | 0           | 1.372538255 |
| ENSMUSG00000030386 | 0.302948998  | 3.815571101  | 0.892435614 | 0.344818132 | 0.999071534 | Zfp606        | Zfp606    | ZNF606  | 17.89590855 | 9.189956883 | 8.482347763 | 15.26406344 | 13.93074562 | 14.11585934 | 15.8552469  | 12.57300634 | 17.91365336 | 12.28748533 |
| ENSMUSG00000097534 | 0.666512063  | 0.379812704  | 0.89241871  | 0.344822701 | 0.999071534 | Gm16675       | Gm16675   |         | 0.842160403 | 1.837991377 | 0.403921322 | 0.138764213 | 1.504258917 | 1.819054038 | 1.164875283 | 0.690824524 | 0.942823861 | 2.418281687 |
| ENSMUSG00000014077 | -0.210057042 | 6.769284623  | 0.892104715 | 0.344907587 | 0.999071534 | Chp1          | Chp1      | CHP1    | 127.2364008 | 151.1303232 | 109.3953581 | 99.632705   | 121.0601415 | 122.3859557 | 93.90189084 | 115.5058604 | 77.8615372  | 81.11047495 |
| ENSMUSG00000039842 | -0.246343907 | 4.342516817  | 0.891770302 | 0.344998023 | 0.999071534 | Mcph1         | Mcph1     | MCPH1   | 23.79103137 | 20.39577528 | 28.94769475 | 20.60648565 | 19.81697616 | 28.08619435 | 21.29133155 | 15.05997462 | 9.742513232 | 17.71227938 |
| ENSMUSG00000033149 | 0.243750888  | 5.59081131   | 0.891722918 | 0.34501084  | 0.999071534 | Phldb2        | Phldb2    | PHLDB2  | 29.26507399 | 48.97357668 | 50.69212592 | 46.6247756  | 52.51825696 | 47.29540499 | 37.98787727 | 79.16849044 | 39.52003351 | 45.62055722 |
| ENSMUSG00000072115 | -0.491598489 | 2.033292066  | 0.891458914 | 0.345082262 | 0.999071534 | Ang           | Ang       | ANG     | 2.245761073 | 3.379532531 | 2.288887492 | 11.03175494 | 4.578179312 | 2.40115133  | 3.818202315 | 2.625133191 | 2.671334273 | 4.182973728 |
| ENSMUSG00000036966 | -0.228242083 | 5.64820277   | 0.891387732 | 0.345101523 | 0.999071534 | Spryd3        | Spryd3    | SPRYD3  | 61.12680921 | 72.80817453 | 48.67251931 | 36.77251647 | 62.59025145 | 80.54771281 | 44.20054545 | 40.4823171  | 25.3776756  | 40.71863489 |
| ENSMUSG00000025937 | 0.236202098  | 4.471264608  | 0.890965092 | 0.345215911 | 0.999071534 | Lactb2        | Lactb2    | LACTB2  | 25.33499211 | 18.14275359 | 18.51306059 | 20.25957511 | 23.02170168 | 25.03018356 | 33.32837614 | 21.00106553 | 17.04939816 | 19.34625349 |
| ENSMUSG00000042672 | 0.832915033  | -0.092911373 | 0.890842935 | 0.345248983 | 0.999071534 | Dcst1         | Dcst1     | DCST1   | 1.684320805 | 0.296450222 | 0.336601102 | 0           | 0.784830739 | 1.091432423 | 1.035444696 | 0.27632981  | 1.649941757 | 0.849666539 |
| ENSMUSG00000026568 | 0.255180083  | 6.348163315  | 0.890790376 | 0.345263213 | 0.999071534 | Mpc2          | Mpc2      | MPC2    | 93.19908454 | 50.57440788 | 70.4842707  | 96.4411281  | 72.66224593 | 53.91676169 | 96.10221082 | 84.62600418 | 86.66122657 | 94.70513957 |
| ENSMUSG00000030082 | -0.267505819 | 7.707425159  | 0.890540923 | 0.345330765 | 0.999071534 | Sec61a1       | Sec61a1   | SEC61A1 | 268.4386283 | 254.4728706 | 220.4737216 | 199.5429384 | 245.0633983 | 332.6686025 | 242.0999129 | 138.510317  | 88.38973699 | 156.4040021 |
| ENSMUSG00000038773 | -0.238419339 | 5.055461028  | 0.890531558 | 0.345333301 | 0.999071534 | Kdm3b         | Kdm3b     | KDM3B   | 37.40595788 | 46.0683645  | 32.31370576 | 29.48739528 | 41.59602918 | 48.6051239  | 24.46238094 | 32.60691753 | 13.35667137 | 32.26771293 |
| ENSMUSG00000070871 | 0.221963554  | 5.060722895  | 0.890434732 | 0.345359527 | 0.999071534 | Ccnyl1        | Ccnyl1    | CCNYL1  | 29.68615419 | 26.26548967 | 32.98690797 | 31.91576901 | 38.45670622 | 59.08287516 | 32.42236203 | 24.93876531 | 30.87748145 | 29.21545713 |
| ENSMUSG00000032050 | 0.28824904   | 7.440379296  | 0.890418369 | 0.345363959 | 0.999071534 | Rdx           | Rdx       | RDX     | 118.1129965 | 125.8727643 | 228.1482267 | 203.3589543 | 129.497072  | 194.4204956 | 153.7635373 | 139.6156363 | 246.705577  | 162.8745395 |
| ENSMUSG00000075514 | -0.583591463 | 1.256253406  | 0.890058714 | 0.345461398 | 0.999071534 | Gm13375       | Gm13375   |         | 2.807201342 | 2.193731643 | 3.231370576 | 2.636520049 | 3.139322957 | 2.473913492 | 1.553167044 | 2.417885834 | 0           | 2.61435858  |
| ENSMUSG00000027845 | 0.338160524  | 3.098861672  | 0.889738178 | 0.345548269 | 0.999071534 | Dclre1b       | Dclre1b   | DCLRE1B | 12.7727661  | 6.936935196 | 5.385617627 | 6.452535909 | 7.325086899 | 13.53376204 | 12.10175988 | 7.184575049 | 6.521198373 | 7.124127131 |
| ENSMUSG00000034163 | 0.220544014  | 6.198000062  | 0.889665938 | 0.345567852 | 0.999071534 | Zfc3h1        | Zfc3h1    | ZFC3H1  | 65.12707113 | 68.30213116 | 66.71433836 | 67.71693599 | 83.7806814  | 67.45052373 | 55.5904371  | 92.2941564  | 63.64061063 | 97.97308779 |

|                     |              |              |             |             |             |               |               |          |  |             |             |             |             |             |             |             |             |             |             |
|---------------------|--------------|--------------|-------------|-------------|-------------|---------------|---------------|----------|--|-------------|-------------|-------------|-------------|-------------|-------------|-------------|-------------|-------------|-------------|
| ENSMUSG00000053600  | 0.388472724  | 2.632230376  | 0.88932449  | 0.34566043  | 0.999071534 | Zfp472        | Zfp472        |          |  | 5.403862583 | 4.091013064 | 6.732022034 | 6.660682229 | 4.251166504 | 9.022508029 | 12.16647517 | 4.973936572 | 3.221314859 | 4.771204409 |
| ENSMUSG000000024560 | 0.214066056  | 4.887070677  | 0.889155534 | 0.345706253 | 0.999071534 | Cxhc1         | Cxhc1         | CXXC1    |  | 29.26507399 | 28.5778014  | 25.64900395 | 24.97755836 | 33.48611154 | 40.89233478 | 23.16807507 | 37.30452429 | 21.99922343 | 31.306944   |
| ENSMUSG000000051232 | 0.272546036  | 4.673102148  | 0.889083606 | 0.345725763 | 0.999071534 | Tmem199       | Tmem199       | TMEM199  |  | 31.15993489 | 23.24169741 | 21.27318963 | 20.67586775 | 23.34871449 | 29.6869619  | 46.98330307 | 14.30006765 | 17.04939816 | 27.97363681 |
| ENSMUSG00000030057  | 0.248474225  | 8.937118409  | 0.888714221 | 0.34582598  | 0.999071534 | Cnbp          | Cnbp          | CNBP     |  | 486.9792527 | 411.9472285 | 255.4343198 | 456.8117895 | 442.3829266 | 569.2911518 | 705.9791366 | 400.3328116 | 445.798549  | 449.342881  |
| ENSMUSG000000087354 | -0.81147369  | -0.235984569 | 0.888640233 | 0.345846058 | 0.999071534 | 4930404I05Rik | 4930404I05Rik |          |  | 0.98252047  | 0.5336104   | 1.077123525 | 0.763203172 | 1.373453794 | 0.218286485 | 0.647152935 | 1.4507315   | 0.078568655 | 0.065358965 |
| ENSMUSG000000060671 | -0.221278243 | 6.389856657  | 0.888284657 | 0.345942573 | 0.999071534 | Atp8b2        | Atp8b2        | ATP8B2   |  | 106.0420307 | 135.1220112 | 70.68623136 | 67.30064335 | 91.23657343 | 104.4137018 | 65.62130759 | 83.17527268 | 51.85531236 | 74.5745785  |
| ENSMUSG00000048856  | 0.447812963  | 2.006189626  | 0.888180473 | 0.345970859 | 0.999071534 | Slc25a47      | Slc25a47      | SLC25A47 |  | 3.789721811 | 2.490181865 | 3.298690797 | 4.232308499 | 3.204725518 | 2.546675653 | 2.070889391 | 4.421276953 | 4.714119306 | 7.25484506  |
| ENSMUSG000000086480 | -1.14949967  | -0.868292691 | 0.887402041 | 0.346182302 | 0.999071534 | Gm15287       | Gm15287       |          |  | 1.19306057  | 1.363671021 | 0.06732022  | 0           | 0.327012808 | 0.363810808 | 0.323576467 | 0.552659619 | 0           | 0           |
| ENSMUSG000000090035 | 0.218036328  | 4.971138754  | 0.886997554 | 0.346292241 | 0.999071534 | Galnt4        | Galnt4        | GALNT4   |  | 24.21211157 | 29.70431225 | 27.66861056 | 31.29133005 | 36.88704474 | 38.85499425 | 34.36382084 | 23.90252853 | 33.941659   | 30.32655953 |
| ENSMUSG00000043279  | -0.257119241 | 5.148264239  | 0.886951618 | 0.346304729 | 0.999071534 | Trim56        | Trim56        | TRIM56   |  | 31.51083506 | 49.56647712 | 30.69802048 | 46.6247756  | 40.61499075 | 38.78223209 | 17.34369865 | 28.7383002  | 38.57720965 | 29.67296989 |
| ENSMUSG00000046101  | 0.712592737  | 1.137879263  | 0.886875471 | 0.346325432 | 0.999071534 | Mcmbd2        | Mcmbd2        | MCMBD2   |  | 0.561440268 | 0.237160178 | 1.95228639  | 4.371072713 | 0.784830739 | 1.528005392 | 0.517722348 | 4.075864691 | 1.257098482 | 4.967281302 |
| ENSMUSG00000037993  | -0.230228101 | 5.331275624  | 0.886799964 | 0.346345963 | 0.999071534 | Dhx38         | Dhx38         | DHX38    |  | 48.07332298 | 52.23452912 | 43.15226124 | 37.74386596 | 44.2775342  | 73.05321017 | 29.18659736 | 29.01463001 | 22.62777267 | 32.61412329 |
| ENSMUSG000000086819 | 0.957081     | -0.338811718 | 0.886746978 | 0.346360371 | 0.999071534 | Gm13613       | Gm13613       |          |  | 0.842160403 | 0.296450222 | 0.673202203 | 0.20814632  | 0.39241537  | 0           | 0.064715293 | 0.483577167 | 2.042785033 | 1.30717929  |
| ENSMUSG00000036875  | 0.399535239  | 2.833727269  | 0.886651953 | 0.346386212 | 0.999071534 | Dna2          | Dna2          | DNA2     |  | 10.38664496 | 3.913142931 | 5.318297407 | 4.301690606 | 7.652099707 | 15.28005392 | 6.406814054 | 3.246875263 | 7.306884924 | 7.385562989 |
| ENSMUSG00000042817  | -0.575540698 | 0.575792807  | 0.886633869 | 0.34639113  | 0.999071534 | Flt3          | Flt3          | FLT3     |  | 2.737021308 | 2.371601776 | 1.077123525 | 1.040731598 | 1.24264867  | 1.018670261 | 1.035444696 | 0.414494714 | 1.257098482 | 1.437897219 |
| ENSMUSG00000038677  | 1.056756644  | -0.847694843 | 0.88621328  | 0.34650554  | 0.999071534 | Scube3        | Scube3        | SCUBE3   |  | 0.98252047  | 0           | 0.269280881 | 0           | 0.196207685 | 1.018670261 | 0.258861174 | 0.069082452 | 0.471411931 | 1.045743432 |
| ENSMUSG00000022443  | -0.294158692 | 10.03078516  | 0.885710564 | 0.346642357 | 0.999071534 | Myh9          | Myh9          | MYH9     |  | 919.0777193 | 1600.771909 | 1265.889423 | 824.1206616 | 1399.157    | 1520.8747   | 512.8687008 | 1240.375433 | 541.6523082 | 858.032486  |
| ENSMUSG00000028637  | 0.597414912  | 1.002234927  | 0.885577996 | 0.346678449 | 0.999071534 | Ccdc30        | Ccdc30        | CCDC30   |  | 0.98252047  | 1.541541155 | 0.673202203 | 2.150845303 | 2.354492217 | 1.673529715 | 0.517722348 | 1.588896405 | 1.885647722 | 5.097999231 |
| ENSMUSG000000055980 | 0.350108761  | 3.389808438  | 0.885498064 | 0.346700213 | 0.999071534 | Irs1          | Irs1          | IRS1     |  | 7.088183388 | 7.055515284 | 12.99280253 | 7.63203172  | 12.55729183 | 11.56918368 | 4.853647011 | 12.98750105 | 10.99961171 | 14.96720287 |
| ENSMUSG000000097346 | 0.428413452  | 1.833323934  | 0.883927289 | 0.347128278 | 0.999071534 | Gm26619       | Gm26619       |          |  | 3.017741442 | 3.023792265 | 3.567971678 | 1.873316877 | 3.793348573 | 2.255627007 | 4.465355525 | 3.108710358 | 4.32127603  | 4.313691657 |
| ENSMUSG00000031668  | -0.253988801 | 4.169382558  | 0.883540897 | 0.347233687 | 0.999071534 | Elf2ak3       | Elf2ak3       | EIF2AK3  |  | 15.08870721 | 25.31684896 | 19.05162236 | 18.52502245 | 22.95629912 | 23.42941601 | 14.04321869 | 19.27400422 | 9.506807267 | 14.24825426 |
| ENSMUSG00000032715  | -0.391488199 | 2.798907114  | 0.883490234 | 0.347247511 | 0.999071534 | Trtb3         | Trtb3         | TRIB3    |  | 6.105662918 | 15.29683146 | 7.607184899 | 5.342422204 | 5.951633105 | 5.820972922 | 3.494625848 | 7.460904859 | 3.69272679  | 8.104511599 |
| ENSMUSG000000087687 | 0.29491022   | 5.267313324  | 0.883317725 | 0.347294589 | 0.999071534 | Pet100        | Pet100        | PET100   |  | 32.28281543 | 24.90181865 | 37.96860427 | 53.42422204 | 28.58091942 | 21.31931333 | 35.78755729 | 37.5808541  | 48.31972289 | 53.26755607 |
| ENSMUSG000000000581 | 0.249371011  | 6.384580826  | 0.883242635 | 0.347315083 | 0.999071534 | C1d           | C1d           | C1D      |  | 90.6024233  | 57.15560281 | 84.28491587 | 90.54364905 | 71.87741519 | 71.81625342 | 142.5030762 | 61.55246508 | 75.89732082 | 81.69870563 |
| ENSMUSG00000031672  | -0.236701872 | 7.142076981  | 0.8825804   | 0.347495901 | 0.999071534 | Got2          | Got2          | GOT2     |  | 158.957776  | 161.4467909 | 140.228019  | 148.7552364 | 184.3698211 | 223.8164088 | 134.5430951 | 109.9792642 | 68.82614187 | 113.9860341 |
| ENSMUSG000000047821 | 0.290414768  | 3.643641491  | 0.882458748 | 0.347529131 | 0.999071534 | Trim16        | Trim16        | TRIM16L  |  | 10.10592483 | 13.34025999 | 11.37711724 | 10.26855177 | 12.75349951 | 21.24655116 | 13.65492692 | 15.9580465  | 5.892649132 | 11.30710086 |
| ENSMUSG00000032897  | 0.229755903  | 4.730698136  | 0.882159719 | 0.347610831 | 0.999071534 | Nfyc          | Nfyc          | NFYC     |  | 24.42265167 | 20.98867572 | 31.84246422 | 18.80255087 | 30.60839883 | 37.90908615 | 22.19734566 | 22.45179703 | 26.47763677 | 29.34617506 |
| ENSMUSG000000055401 | 0.233460757  | 5.07955706   | 0.882076655 | 0.347633531 | 0.999071534 | Fbxo6         | Fbxo6         | FBXO6    |  | 33.40569597 | 31.18656336 | 27.93789144 | 31.15256584 | 37.21405755 | 24.59361059 | 34.23439025 | 48.21955177 | 26.2419308  | 40.13040421 |
| ENSMUSG000000061118 | -0.319767281 | 3.459778796  | 0.882026312 | 0.347647289 | 0.999071534 | Dnajc30       | Dnajc30       | DNAJC30  |  | 9.895384729 | 9.486407105 | 10.83855548 | 15.54159187 | 16.67765321 | 9.531843159 | 7.24811287  | 13.26383086 | 5.499805857 | 11.37245982 |
| ENSMUSG00000037905  | 0.20718828   | 5.893396021  | 0.881994369 | 0.347656019 | 0.999071534 | Bri3bp        | Bri3bp        | BRI3BP   |  | 49.96818388 | 49.32931695 | 60.31891743 | 60.77872534 | 64.94474366 | 54.93543195 | 54.87856887 | 76.68152216 | 47.84831095 | 70.39160477 |
| ENSMUSG000000002732 | -0.262359136 | 4.624079473  | 0.881705296 | 0.347735038 | 0.999071534 | Fkbp7         | Fkbp7         | FKBP7    |  | 24.14193154 | 23.3602775  | 31.90978444 | 38.22954071 | 20.01318385 | 18.77263767 | 28.7335903  | 24.45518815 | 18.14935933 | 16.53581802 |
| ENSMUSG000000040124 | 0.21779963   | 4.911457922  | 0.881195213 | 0.347874529 | 0.999071534 | Gorab         | Gorab         | GORAB    |  | 31.37047499 | 32.43165429 | 27.1300488  | 24.49188361 | 28.71172454 | 28.7410538  | 40.57648901 | 34.05764903 | 26.2419308  | 24.83640651 |
| ENSMUSG000000045107 | 0.299188029  | 3.842105188  | 0.880302592 | 0.348118815 | 0.999071534 | Saysd1        | Saysd1        | SAYSD1   |  | 14.80798708 | 8.952796705 | 14.81044848 | 13.87642131 | 13.60373281 | 10.55051342 | 18.50857394 | 10.36236786 | 16.9708295  | 17.32012559 |
| ENSMUSG00000033031  | 0.244739014  | 5.327172319  | 0.879937424 | 0.348218819 | 0.999071534 | C330027C09Rik | C330027C09Rik | KIAA1524 |  | 37.05505771 | 28.99283172 | 44.49866565 | 36.63375226 | 42.96948297 | 58.64630219 | 67.88634286 | 29.01463001 | 30.01322625 | 28.1697137  |
| ENSMUSG00000026064  | 0.260426321  | 7.82559597   | 0.879931006 | 0.348220577 | 0.999071534 | Ptp4a1        | Ptp4a1        | PTP4A1   |  | 185.2051085 | 218.1873634 | 234.7456083 | 198.8491174 | 234.3373782 | 177.5396741 | 216.7962332 | 326.9672472 | 235.548828  | 207.5800713 |
| ENSMUSG000000018474 | -0.230142868 | 6.363102107  | 0.879818536 | 0.348251386 | 0.999071534 | Chd3          | Chd3          | CHD3     |  | 76.21551643 | 116.0306169 | 92.09406143 | 91.58438064 | 84.10769421 | 103.9771288 | 41.74136429 | 86.56031285 | 53.81952874 | 84.5091411  |
| ENSMUSG00000048921  | 0.52781353   | 1.173738985  | 0.87979357  | 0.348258225 | 0.999071534 | Zfp689        | Zfp689        | ZNF689   |  | 1.965040939 | 1.422961066 | 2.423527932 | 0.555056852 | 2.746907587 | 4.438491853 | 1.553167044 | 1.174401691 | 1.649941757 | 3.725460977 |
| ENSMUSG000000024873 | 0.702838356  | 0.549909364  | 0.87973035  | 0.348275545 | 0.999071534 | Cnih2         | Cnih2         | CNIH2    |  | 1.543960738 | 1.304380977 | 1.615685288 | 0.069382107 | 0.784830739 | 0.800383777 | 0.517722348 | 1.4507315   | 1.099961171 | 3.986896835 |
| ENSMUSG000000334424 | 0.268382395  | 5.85803069   | 0.879584673 | 0.348315459 | 0.999071534 | Gcsh          | Gcsh          | GCSH     |  | 62.88131005 | 40.91013064 | 54.32741782 | 57.44838422 | 56.76942347 | 74.58121556 | 116.6169588 | 33.64315432 | 41.32711258 | 44.31337793 |

|                     |              |              |             |             |             |               |               |            |             |             |             |             |             |             |             |             |             |             |
|---------------------|--------------|--------------|-------------|-------------|-------------|---------------|---------------|------------|-------------|-------------|-------------|-------------|-------------|-------------|-------------|-------------|-------------|-------------|
| ENSMUSG00000066406  | -0.23424022  | 5.695609677  | 0.878781493 | 0.348535636 | 0.999071534 | Akap13        | Akap13        | AKAP13     | 55.2316864  | 65.21904885 | 61.19408029 | 54.81186417 | 53.49929539 | 66.06804266 | 22.71506801 | 47.52872725 | 49.81252733 | 43.00619864 |
| ENSMUSG000000057134 | 0.191107167  | 5.811750359  | 0.878654674 | 0.348570418 | 0.999071534 | Ado           | Ado           | ADO        | 46.66972231 | 47.6691957  | 57.35682773 | 50.99584831 | 69.19591017 | 70.65205884 | 55.07271475 | 52.84807608 | 51.69817505 | 58.75770909 |
| ENSMUSG000000061787 | 0.26969566   | 9.7490583    | 0.878184218 | 0.34869949  | 0.999071534 | Rps17         | Rps17         |            | 820.3344121 | 709.9389917 | 898.5229809 | 877.3367373 | 733.2281181 | 574.6755517 | 1048.064178 | 948.7784012 | 943.766685  | 897.7053775 |
| ENSMUSG000000092344 | 1.33742482   | -0.982173522 | 0.877541257 | 0.348875995 | 0.999071534 | Hspe1-ps3     | Hspe1-ps3     |            | 0.491260235 | 0           | 0.403921322 | 0.069382107 | 0.196207685 | 0           | 1.035444696 | 0           | 1.414235792 | 0           |
| ENSMUSG000000058488 | 0.935394685  | -0.713641755 | 0.877052578 | 0.349010227 | 0.999071534 | Kl            | Kl            | KL         | 0.701800335 | 0.177870133 | 0           | 0.555056852 | 0.261610246 | 0.436572969 | 0.064715293 | 1.174401691 | 0.31427462  | 1.045743432 |
| ENSMUSG000000082179 | 0.08026134   | 0.485517761  | 0.877027741 | 0.349017052 | 0.999071534 | Gm11407       | Gm11407       |            | 0.771980369 | 0.5336104   | 0.605881983 | 2.705902155 | 0.130805123 | 0.291048646 | 0.323576467 | 1.243484143 | 3.69272679  | 1.633974113 |
| ENSMUSG000000033285 | 0.219429341  | 5.597864882  | 0.876767876 | 0.349088463 | 0.999071534 | Wdr3          | Wdr3          | WDR3       | 42.88000049 | 50.27795766 | 44.96990719 | 42.18432078 | 51.66802366 | 83.09438846 | 56.17287474 | 31.91609301 | 47.7697423  | 36.33958426 |
| ENSMUSG000000056228 | 0.251453424  | 4.318683902  | 0.876050406 | 0.349285728 | 0.999071534 | Cars2         | Cars2         | CARS2      | 22.1768906  | 15.53399163 | 16.08953266 | 19.63513615 | 20.53640434 | 28.30448083 | 28.86302089 | 14.02373784 | 18.22792798 | 15.68615148 |
| ENSMUSG000000078489 | 0.909309402  | -0.528086208 | 0.875826859 | 0.349347222 | 0.999071534 | Gm17106       | Gm17106       |            | 0.140360067 | 0.059290044 | 1.077123525 | 0.277528426 | 0.457817931 | 0.145524323 | 0.517722348 | 0.27632981  | 0.392843275 | 2.156845829 |
| ENSMUSG000000037907 | 0.243263004  | 4.816007073  | 0.875557047 | 0.349421463 | 0.999071534 | Ankrd13b      | Ankrd13b      | ANKRD13B   | 25.89643238 | 24.78323856 | 24.43723998 | 26.5039647  | 31.72024237 | 32.81573485 | 15.79053161 | 31.22526848 | 26.47763677 | 39.86896835 |
| ENSMUSG000000020131 | 0.497884403  | 1.749087141  | 0.875430023 | 0.349456422 | 0.999071534 | Pcsk4         | Pcsk4         | PCSK4      | 3.087921476 | 3.675982753 | 3.096730136 | 0.416292639 | 3.793348573 | 3.929156722 | 2.588611739 | 4.766689215 | 2.042785033 | 5.097999231 |
| ENSMUSG000000048763 | -0.796912152 | -0.117179803 | 0.875252503 | 0.349505286 | 0.999071534 | Hoxb3         | Hoxb3         | HOXB3      | 0.771980369 | 1.48225111  | 0.403921322 | 2.081463196 | 0.327012808 | 1.309718907 | 0.582437641 | 0.345412262 | 0           | 0.71894861  |
| ENSMUSG000000075042 | -0.757549052 | -0.183798574 | 0.874946608 | 0.349589509 | 0.999071534 | 4930431P03Rik | 4930431P03Rik |            | 1.473780704 | 0.415030311 | 1.481044848 | 0.901967385 | 0.588623054 | 0.145524323 | 0.647152935 | 1.105319238 | 0.078568655 | 0.653589645 |
| ENSMUSG000000032586 | 0.359913398  | 3.240031847  | 0.874669302 | 0.349665883 | 0.999071534 | Traip         | Traip         | TRAP       | 10.6673651  | 4.209593153 | 10.09803305 | 9.089055958 | 8.240722761 | 15.71662689 | 10.22501637 | 4.559441858 | 11.86386692 | 8.431306421 |
| ENSMUSG000000097461 | 0.768120378  | -0.264497256 | 0.874517539 | 0.349707691 | 0.999071534 | Gm26735       | Gm26735       |            | 0.140360067 | 0.355740266 | 0.740522424 | 0.693821065 | 0.784830739 | 0.509335131 | 0.19414588  | 0.690824524 | 1.649941757 | 1.045743432 |
| ENSMUSG000000030008 | 0.350819021  | 2.920549833  | 0.874365268 | 0.349749646 | 0.999071534 | Pradc1        | Pradc1        | PRADC1     | 6.456563086 | 4.98036373  | 7.405224238 | 7.63203172  | 7.39048946  | 7.785551283 | 10.48387754 | 4.006782239 | 8.249708785 | 9.346331924 |
| ENSMUSG000000069305 | -1.345406839 | -0.406525818 | 0.874363743 | 0.349750066 | 0.999071534 | Hist1h4n      | Hist1h4n      | HIST2H4B   | 0           | 1.422961066 | 2.423527932 | 0.693821065 | 0           | 0           | 0.517722348 | 1.105319238 | 0           | 0           |
| ENSMUSG000000091881 | 0.531252103  | 2.424738862  | 0.874303642 | 0.349766627 | 0.999071534 | Gm17146       | Gm17146       |            | 2.596661241 | 2.430891821 | 6.193460271 | 6.868828548 | 3.924153696 | 1.45524323  | 1.876743511 | 6.493750525 | 7.385453579 | 11.17638293 |
| ENSMUSG000000046909 | 0.393871871  | 3.10341777   | 0.874046391 | 0.349837527 | 0.999071534 | Tefm          | Tefm          | TEFM       | 9.755024662 | 7.707705773 | 4.914376085 | 7.84017804  | 7.78290483  | 11.71470801 | 20.12645627 | 6.010173358 | 3.78452169  | 6.666614379 |
| ENSMUSG000000022176 | -0.543336775 | 1.061887542  | 0.873354067 | 0.350028432 | 0.999071534 | Rem2          | Rem2          | REM2       | 0.771980369 | 4.506043375 | 3.567971678 | 1.803393477 | 1.308051232 | 2.037340523 | 1.423736457 | 2.003391119 | 0.707117896 | 1.633974113 |
| ENSMUSG000000024953 | -0.26407529  | 8.103160913  | 0.873159076 | 0.350082225 | 0.999071534 | Prdx5         | Prdx5         | PRDX5      | 341.004783  | 299.7111745 | 345.2180899 | 263.4438586 | 310.596765  | 188.0901875 | 230.1922989 | 348.0373952 | 151.716073  | 281.8278549 |
| ENSMUSG000000046753 | 0.253719154  | 4.419634589  | 0.873029467 | 0.350117987 | 0.999071534 | Ccdc66        | Ccdc66        | CCDC66     | 16.56248792 | 21.16654585 | 21.27318963 | 13.32136446 | 28.97333479 | 19.71854577 | 18.70271982 | 27.08032134 | 18.69933991 | 26.40502166 |
| ENSMUSG000000047669 | -0.681523175 | 0.542571655  | 0.87265121  | 0.350222386 | 0.999071534 | Msl3l2        | Msl3l2        | MSL3       | 1.543960738 | 2.312311732 | 0.538561763 | 2.705902155 | 1.24264867  | 1.382481069 | 0.776583522 | 1.72706131  | 0           | 1.176461361 |
| ENSMUSG000000028466 | -0.20782578  | 5.435470859  | 0.872223699 | 0.350340403 | 0.999071534 | Creb3         | Creb3         | CREB3      | 51.51214462 | 52.35310921 | 38.30520537 | 46.69415771 | 51.47181598 | 39.50985371 | 54.6197077  | 36.89002958 | 26.39906811 | 36.92781495 |
| ENSMUSG000000090733 | 0.459801444  | 3.118200682  | 0.872222928 | 0.350340642 | 0.999071534 | Rps27         | Rps27         | RPS27      | 8.842684226 | 8.597056439 | 6.933982695 | 8.603381212 | 4.251166504 | 4.438491853 | 26.27440915 | 6.217420715 | 5.814080477 | 4.705845444 |
| ENSMUSG000000031378 | -0.319543486 | 4.258613016  | 0.872031722 | 0.350393455 | 0.999071534 | Abcd1         | Abcd1         | ABCD1      | 22.87869093 | 33.9139054  | 10.63659481 | 14.36209606 | 28.64632198 | 29.17762677 | 20.96775509 | 15.75079915 | 7.935434165 | 11.30710086 |
| ENSMUSG000000026883 | -0.23860128  | 4.683309773  | 0.870839139 | 0.350723104 | 0.999071534 | Dab2ip        | Dab2ip        | DAB2IP     | 22.52779077 | 31.83875385 | 30.96730136 | 27.19778577 | 31.06621676 | 36.23555644 | 14.10793398 | 27.21848624 | 16.73512354 | 21.30702243 |
| ENSMUSG000000039795 | -0.255631842 | 4.074875375  | 0.870744998 | 0.350749144 | 0.999071534 | Zfand1        | Zfand1        | ZFAND1     | 21.61545033 | 18.32062372 | 14.74312825 | 24.70002993 | 14.58477124 | 15.64386473 | 17.861421   | 13.95465538 | 11.62816095 | 14.57504908 |
| ENSMUSG000000041375 | -0.219328009 | 5.195413663  | 0.870587178 | 0.350792804 | 0.999071534 | Ccdc9         | Ccdc9         | CCDC9      | 47.37152264 | 31.42372354 | 44.36402521 | 41.49049972 | 39.11073183 | 46.93159418 | 23.55636683 | 28.8764651  | 23.33489056 | 43.20227554 |
| ENSMUSG000000002329 | 0.223244749  | 5.069221885  | 0.87019183  | 0.350902207 | 0.999071534 | Mdp1          | Mdp1          | NEDD8-MDP1 | 33.82677617 | 31.89804389 | 35.94899766 | 33.09526482 | 25.04918109 | 30.05077271 | 44.58883721 | 27.14940379 | 35.12018883 | 34.31345637 |
| ENSMUSG000000060098 | 0.311468235  | 5.221835003  | 0.870166532 | 0.35090921  | 0.999071534 | Prmt7         | Prmt7         | PRMT7      | 48.63476324 | 36.99698771 | 29.68821717 | 19.98204669 | 38.45670622 | 55.00819411 | 80.50582509 | 21.6228076  | 17.75651605 | 30.84943125 |
| ENSMUSG000000061702 | 0.664361881  | 0.976715456  | 0.870038712 | 0.350944592 | 0.999071534 | Tmem91        | Tmem91        | TMEM91     | 0.842160403 | 1.778701332 | 2.490848153 | 0.277528426 | 2.092881971 | 0.363810808 | 0.711868228 | 2.417885834 | 3.221314859 | 3.529384083 |
| ENSMUSG000000022361 | -0.204830351 | 5.14286586   | 0.870008198 | 0.350953039 | 0.999071534 | Zhx1          | Zhx1          | ZHX1       | 36.07253724 | 46.66126495 | 29.62089695 | 40.86606076 | 42.38085991 | 37.90908615 | 38.31145374 | 29.15279491 | 23.41345922 | 30.52263642 |
| ENSMUSG000000027189 | -0.219837954 | 5.252603737  | 0.86911565  | 0.35120025  | 0.999071534 | Trim44        | Trim44        | TRIM44     | 45.05558153 | 55.1397413  | 32.58298665 | 34.55228906 | 45.71639056 | 58.57354003 | 28.08643737 | 32.39967017 | 21.60638015 | 34.37881533 |
| ENSMUSG000000020078 | 0.249360099  | 7.26074166   | 0.869058797 | 0.351216005 | 0.999071534 | Vps26a        | Vps26a        | VPS26A     | 138.8161063 | 169.569527  | 117.6084249 | 118.504638  | 185.3508596 | 127.8431178 | 198.5465204 | 212.4285411 | 118.9529438 | 138.8224406 |
| ENSMUSG000000012535 | 0.216178281  | 6.30211027   | 0.868923218 | 0.35125358  | 0.999071534 | Tnp03         | Tnp03         | TNPO3      | 65.96923153 | 68.59858138 | 84.21759565 | 79.92818674 | 78.81008672 | 108.997718  | 59.40863941 | 66.38823675 | 92.78958167 | 78.88827016 |
| ENSMUSG000000024675 | -0.342192649 | 4.20389498   | 0.868664419 | 0.35132532  | 0.999071534 | Ms4a4c        | Ms4a4c        |            | 36.77433758 | 15.53399163 | 23.76403778 | 9.435966491 | 21.77905301 | 32.23363755 | 19.41458804 | 7.599069763 | 9.663944577 | 12.87571601 |
| ENSMUSG000000057789 | -0.235663372 | 5.996150447  | 0.868394822 | 0.351400073 | 0.999071534 | Bak1          | Bak1          | BAK1       | 90.11116307 | 70.67373293 | 70.95551224 | 53.28545783 | 74.29730997 | 109.2160044 | 62.5149735  | 47.80505706 | 27.49902928 | 49.1137717  |
| ENSMUSG000000022500 | -0.254878481 | 7.514268906  | 0.867686668 | 0.351596534 | 0.999071534 | Litaf         | Litaf         | LITAF      | 178.2572852 | 297.0431225 | 165.2711409 | 168.4597547 | 226.2928631 | 184.0882687 | 143.2149445 | 232.6696997 | 109.7604112 | 139.2799534 |

|                     |              |              |             |             |             |               |               |          |             |             |             |             |             |             |             |             |             |             |
|---------------------|--------------|--------------|-------------|-------------|-------------|---------------|---------------|----------|-------------|-------------|-------------|-------------|-------------|-------------|-------------|-------------|-------------|-------------|
| ENSMUSG00000007877  | -1.251464417 | -0.397557389 | 0.867463219 | 0.351658556 | 0.999071534 | Tcap          | Tcap          | TCAP     | 2.666841275 | 0           | 1.683005509 | 0           | 0.261610246 | 0.436572969 | 0           | 0.207247357 | 0           | 1.176461361 |
| ENSMUSG00000010048  | 0.292716836  | 4.311244767  | 0.866932961 | 0.351805796 | 0.999071534 | lfrd2         | lfrd2         | IFRD2    | 25.26481208 | 11.85800888 | 20.12874588 | 16.9986161  | 17.92030188 | 38.78223209 | 27.43928444 | 9.80970824  | 15.3994564  | 17.25476663 |
| ENSMUSG000000041801 | -0.189790335 | 5.914597234  | 0.866886334 | 0.351818748 | 0.999071534 | Phlda3        | Phlda3        | PHLDA3   | 66.39031173 | 61.78022627 | 68.26270343 | 64.45597698 | 72.204428   | 73.78083178 | 68.40406521 | 50.22294289 | 36.29871866 | 47.84276202 |
| ENSMUSG000000047945 | -0.248453065 | 7.466112353  | 0.866827925 | 0.351834973 | 0.999071534 | Marcks1       | Marcks1       | MARCKSL1 | 169.414601  | 141.7032061 | 273.7240159 | 202.3182227 | 206.4104844 | 192.2376307 | 110.469006  | 160.8930316 | 137.2594405 | 180.2600241 |
| ENSMUSG00000002396  | 0.250039842  | 4.302135877  | 0.866644485 | 0.351885935 | 0.999071534 | Ocel1         | Ocel1         | OCEL1    | 19.79076946 | 14.8225111  | 15.68561134 | 24.07559097 | 18.11650956 | 19.35473496 | 19.28515746 | 17.20153065 | 18.30649664 | 27.84291888 |
| ENSMUSG00000039908  | -0.49048763  | 1.605282194  | 0.866542469 | 0.351914281 | 0.999071534 | Slc26a11      | Slc26a11      | SLC26A11 | 5.193322482 | 4.387463286 | 1.615685288 | 3.330341114 | 3.139322957 | 3.492583753 | 3.041618794 | 3.661369977 | 0.785686551 | 1.045743432 |
| ENSMUSG00000023939  | 0.244153775  | 6.447233952  | 0.866534601 | 0.351916467 | 0.999071534 | Mrlp14        | Mrlp14        | MRPL14   | 97.62042666 | 63.26247738 | 80.98622507 | 85.8256658  | 86.20057618 | 56.46343734 | 124.9652317 | 96.23185618 | 86.2683833  | 81.50262874 |
| ENSMUSG00000031304  | -0.372300441 | 4.6608261    | 0.866074526 | 0.352044343 | 0.999071534 | Il2rg         | Il2rg         | IL2RG    | 45.47666174 | 40.19865011 | 23.42743668 | 14.91715291 | 24.72216828 | 50.78798874 | 31.32220204 | 14.3691501  | 6.364061063 | 11.24174189 |
| ENSMUSG00000035183  | 0.869520464  | -0.41219353  | 0.865585866 | 0.352180233 | 0.999071534 | Slc24a5       | Slc24a5       | SLC24A5  | 0.280720134 | 0.889350666 | 0           | 0.416292639 | 0.719428178 | 0.509335131 | 0.323576467 | 1.4507315   | 1.257098482 | 0.196076894 |
| ENSMUSG00000033906  | -0.727151043 | -0.015605799 | 0.864888113 | 0.352374393 | 0.999071534 | Zdhhc15       | Zdhhc15       | ZDHHC15  | 1.684320805 | 1.422961066 | 0.471241542 | 1.318260024 | 0.588623054 | 1.964578361 | 0.711868228 | 0.27632981  | 0.15713731  | 0.261435858 |
| ENSMUSG00000018583  | 0.244985941  | 8.035955026  | 0.864634192 | 0.352445087 | 0.999071534 | G3bp1         | G3bp1         | G3BP1    | 262.8944056 | 206.5072247 | 279.5135549 | 243.531194  | 253.5003287 | 369.7773049 | 283.9707078 | 189.9767441 | 285.9899046 | 245.1614759 |
| ENSMUSG00000038622  | 0.220777444  | 6.092835077  | 0.864339216 | 0.352527235 | 0.999071534 | Med30         | Med30         | MED30    | 76.28569646 | 49.74434726 | 73.91670194 | 67.8557002  | 58.27368238 | 65.41318321 | 92.60758497 | 57.20027058 | 71.89031941 | 61.96029835 |
| ENSMUSG00000030533  | -0.238919684 | 4.853828309  | 0.862706816 | 0.352982315 | 0.999071534 | Unc45a        | Unc45a        | UNC45A   | 39.30081878 | 32.8466846  | 30.22677893 | 19.01069719 | 41.7268343  | 44.74872934 | 22.90921389 | 23.55711627 | 15.55659371 | 25.2285603  |
| ENSMUSG00000021510  | 0.368285629  | 2.787103332  | 0.862696773 | 0.352985118 | 0.999071534 | A530054K11Rik | Zfp729a       | ZNF729   | 5.965302851 | 8.597056439 | 3.029409915 | 5.411804311 | 7.78290483  | 8.58593506  | 10.28973166 | 8.35897674  | 5.578374512 | 4.248332693 |
| ENSMUSG00000026274  | 0.373312353  | 2.918906267  | 0.862517149 | 0.353035243 | 0.999071534 | Pask          | Pask          | PASK     | 9.333944461 | 5.573264174 | 8.078426441 | 2.428373729 | 8.567735569 | 13.38823772 | 9.577863435 | 5.872008453 | 6.756904338 | 5.616947841 |
| ENSMUSG00000043909  | 0.227225992  | 5.315047061  | 0.862432335 | 0.353058914 | 0.999071534 | Trp53bp1      | Trp53bp1      | TP53BP1  | 30.94939479 | 41.02871073 | 38.50716604 | 36.0093133  | 43.29649578 | 38.78223209 | 25.62725622 | 52.01908665 | 39.59860217 | 47.58132616 |
| ENSMUSG00000002257  | -0.356293529 | 2.751335321  | 0.862011124 | 0.353176504 | 0.999071534 | Def6          | Def6          | DEF6     | 9.053224327 | 7.292675462 | 10.29999371 | 3.607869541 | 8.502333007 | 9.459080998 | 4.530070544 | 4.90485412  | 3.614158135 | 6.274460592 |
| ENSMUSG00000040848  | -0.208287115 | 5.413166635  | 0.861343207 | 0.353363078 | 0.999071534 | Sft2d2        | Sft2d2        | SFT2D2   | 50.24890402 | 60.77229552 | 32.04442488 | 42.46184921 | 51.53721854 | 44.38491853 | 43.87696898 | 35.57746298 | 26.2419308  | 42.15653211 |
| ENSMUSG00000020464  | 0.210858516  | 5.13449495   | 0.860791607 | 0.353517261 | 0.999071534 | Pnpt1         | Pnpt1         | PNPT1    | 32.98461576 | 34.56609589 | 33.18886863 | 31.08318373 | 36.75623962 | 34.78031321 | 52.54881831 | 31.15618603 | 30.24893221 | 31.89517468 |
| ENSMUSG00000078908  | -0.257101493 | 3.98510516   | 0.860575341 | 0.353577737 | 0.999071534 | Mon1b         | Mon1b         | MON1B    | 16.77302802 | 19.15068434 | 18.31109993 | 15.74973819 | 18.83593774 | 20.66445387 | 9.901439902 | 12.71117124 | 14.6923385  | 11.37245982 |
| ENSMUSG00000013076  | -0.293339912 | 6.571740317  | 0.860438988 | 0.353615873 | 0.999071534 | Amotl1        | Amotl1        | AMOTL1   | 81.19829881 | 83.95470288 | 159.2796413 | 128.9813361 | 85.93896594 | 85.42277763 | 35.65812671 | 78.06317121 | 102.5320949 | 100.6528053 |
| ENSMUSG00000018459  | -0.689613009 | 1.251642815  | 0.860374772 | 0.353633836 | 0.999071534 | Slc13a3       | Slc13a3       | SLC13A3  | 4.56170218  | 3.260952442 | 1.615685288 | 3.122194795 | 1.765869163 | 5.74821076  | 2.265035272 | 0.828989429 | 0           | 0.457512752 |
| ENSMUSG00000027566  | 0.264880767  | 8.025717472  | 0.86025772  | 0.353666581 | 0.999071534 | Psma7         | Psma7         | PSMA7    | 327.4600365 | 204.5506532 | 238.2462598 | 254.3548026 | 202.7479409 | 212.0289387 | 381.2377939 | 239.0943677 | 264.3835244 | 252.0241671 |
| ENSMUSG00000021120  | 0.308042626  | 3.16266619   | 0.860149748 | 0.353696789 | 0.999071534 | Pigh          | Pigh          | PIGH     | 8.702342159 | 8.537766395 | 6.933982695 | 7.007592761 | 9.875786801 | 8.440410737 | 12.03704459 | 8.220811835 | 6.442629718 | 12.02604947 |
| ENSMUSG00000042502  | -0.191074532 | 5.330464226  | 0.859858196 | 0.353778377 | 0.999071534 | Cd2bp2        | Cd2bp2        | CD2BP2   | 44.91522147 | 47.1355853  | 41.67121639 | 41.14358918 | 47.3514546  | 53.77123736 | 33.52252202 | 29.15279491 | 29.2275397  | 38.16963527 |
| ENSMUSG00000035798  | 0.222418709  | 5.042227602  | 0.859562531 | 0.353861143 | 0.999071534 | Zdhhc17       | Zdhhc17       | ZDHHC17  | 26.80877281 | 31.54230362 | 28.67841387 | 28.16913526 | 42.38085991 | 29.6869619  | 33.84609849 | 43.66010991 | 31.663168   | 29.21545713 |
| ENSMUSG00000030315  | -0.37276041  | 4.161377692  | 0.858593213 | 0.354132671 | 0.999071534 | Vgll4         | Vgll4         | VGLL4    | 28.63345369 | 34.03248549 | 12.11763966 | 11.17051915 | 19.03214542 | 32.16087539 | 19.28515746 | 13.67832557 | 3.771295445 | 10.91494707 |
| ENSMUSG00000004798  | -0.209936306 | 5.579235264  | 0.858482947 | 0.354163577 | 0.999071534 | Ulk2          | Ulk2          | ULK2     | 44.5643213  | 59.64578467 | 41.73853661 | 60.15428638 | 58.86230544 | 64.54003727 | 33.32837614 | 42.76203803 | 27.42046063 | 50.58783853 |
| ENSMUSG000000054321 | 0.494513981  | 2.052553729  | 0.858149579 | 0.354257037 | 0.999071534 | Taf4b         | Taf4b         | TAF4B    | 1.333420637 | 2.490181865 | 6.933982695 | 1.457024238 | 5.166802366 | 7.712789121 | 4.659501131 | 2.210638477 | 2.278490998 | 6.731973344 |
| ENSMUSG00000002771  | 0.695121054  | 0.266990661  | 0.858109663 | 0.35426823  | 0.999071534 | Grin2d        | Grin2d        | GRIN2D   | 0.771980369 | 2.371601776 | 0.201960661 | 0.485674746 | 0.39241537  | 1.819054038 | 1.035444696 | 2.141556024 | 0.392843275 | 1.176461361 |
| ENSMUSG000000086290 | 0.283223553  | 4.251400992  | 0.857455396 | 0.354451762 | 0.999071534 | Snhg12        | Snhg12        | SNHG12   | 18.10644865 | 12.03587901 | 22.28299293 | 21.2309246  | 14.45396611 | 12.95166475 | 26.72741621 | 17.68510781 | 20.74212495 | 19.60768935 |
| ENSMUSG000000028538 | -0.297956152 | 3.588625981  | 0.856910447 | 0.354604728 | 0.999071534 | St3gal3       | St3gal3       | ST3GAL3  | 11.5095255  | 14.22961066 | 10.50195437 | 15.19468133 | 16.54684808 | 14.91624311 | 6.147952881 | 9.878790692 | 11.78529826 | 8.692742279 |
| ENSMUSG000000073418 | -0.428129398 | 3.179220039  | 0.856577171 | 0.354698322 | 0.999071534 | C4b           | C4b           | C4A      | 15.50978741 | 15.3561215  | 5.452937848 | 5.342422204 | 12.03407133 | 19.71854577 | 6.924536402 | 6.424668073 | 2.435628308 | 4.248332693 |
| ENSMUSG000000015536 | 0.233228082  | 6.013721382  | 0.856474862 | 0.35472706  | 0.999071534 | Mocs2         | Mocs2         | MOCS2    | 71.23273404 | 40.96942069 | 68.19538321 | 65.84361911 | 60.95518741 | 45.91292392 | 86.71849326 | 71.01676106 | 56.64800033 | 70.71839959 |
| ENSMUSG000000045327 | 0.573884278  | 1.071123011  | 0.856448947 | 0.35473434  | 0.999071534 | 6330549D23Rik | 6330549D23Rik |          | 2.666841275 | 1.719411288 | 1.548365068 | 0.901967385 | 1.504258917 | 2.037340523 | 1.229590576 | 0.690824524 | 5.028393926 | 1.764692042 |
| ENSMUSG000000043059 | 0.230753069  | 4.37700549   | 0.855927734 | 0.354880801 | 0.999071534 | Zfp513        | Zfp513        | ZNF513   | 20.28202969 | 18.49849386 | 20.33070654 | 15.19468133 | 24.72216828 | 26.12161599 | 16.04939278 | 24.93876531 | 15.94943698 | 25.35927823 |
| ENSMUSG00000032000  | 0.316874212  | 7.904042744  | 0.85587846  | 0.354894651 | 0.999071534 | Birc3         | Birc3         | BIRC3    | 171.0287417 | 285.1258236 | 219.2619577 | 181.9892655 | 252.126875  | 156.2931229 | 142.5030762 | 457.1185875 | 225.1777655 | 266.4031393 |
| ENSMUSG00000031565  | -0.257839787 | 8.527079206  | 0.855768048 | 0.354925689 | 0.999071534 | Fgfr1         | Fgfr1         | FGFR1    | 336.1623607 | 484.8739832 | 450.7761954 | 393.8822189 | 418.5109917 | 372.3239805 | 201.8470004 | 449.5195177 | 254.2481769 | 345.0953326 |
| ENSMUSG000000059316 | -0.311673039 | 4.695502428  | 0.855575275 | 0.354979889 | 0.999071534 | Slc27a4       | Slc27a4       | SLC27A4  | 38.87973858 | 40.19865011 | 20.66730764 | 19.63513615 | 29.88897065 | 37.18146454 | 34.88154319 | 16.30345876 | 6.521198373 | 21.76453518 |

|                      |              |              |             |             |             |               |                |               |             |             |             |             |             |             |             |             |             |             |
|----------------------|--------------|--------------|-------------|-------------|-------------|---------------|----------------|---------------|-------------|-------------|-------------|-------------|-------------|-------------|-------------|-------------|-------------|-------------|
| ENSMUSG00000041215   | 0.227632144  | 4.746991061  | 0.855296277 | 0.355058352 | 0.999071534 | Yeats2        | Yeats2         | YEATS2        | 20.77328993 | 24.9611087  | 29.89017783 | 23.79806255 | 28.31930917 | 29.75972406 | 18.63800452 | 30.46536151 | 26.71334273 | 32.41804639 |
| ENSMUSG000000026103  | 0.2500457    | 7.136106962  | 0.855290533 | 0.355059967 | 0.999071534 | Gls           | Gls            | GLS           | 141.3425876 | 154.3319856 | 105.5581055 | 111.98272   | 155.7234992 | 187.7991389 | 228.444986  | 152.1195602 | 80.76857744 | 103.9207536 |
| ENSMUSG000000037509  | -0.623297049 | 0.256729288  | 0.855110328 | 0.355110659 | 0.999071534 | Arhgef4       | Arhgef4        | ARHGEF4       | 2.245761073 | 1.541541155 | 1.750325729 | 0.346910533 | 0.850233301 | 0.727621615 | 0.517722348 | 0.898071881 | 0.942823861 | 0.849666539 |
| ENSMUSG000000039461  | -0.341215137 | 3.183872773  | 0.854859996 | 0.355181094 | 0.999071534 | Tcta          | Tcta           | TCTA          | 15.72032751 | 13.28096995 | 8.280387102 | 7.354503294 | 7.586697145 | 8.440410737 | 10.09558578 | 8.013564478 | 3.221314859 | 9.084896066 |
| ENSMUSG000000004637  | -0.290901307 | 3.565625856  | 0.854612544 | 0.355250738 | 0.999071534 | Wwox          | Wwox           | WWOX          | 11.86042567 | 15.71186177 | 13.80064517 | 12.07248654 | 13.47292769 | 13.02442691 | 7.636404631 | 15.05997462 | 5.499805857 | 10.45743432 |
| ENSMUSG000000095180  | 1.133059906  | -0.869315313 | 0.854515626 | 0.35527802  | 0.999071534 | Rhox5         | Rhox5          |               | 1.122880537 | 0.177870133 | 0.06732022  | 0           | 0.065402562 | 0.218286485 | 0.388291761 | 0           | 1.492804447 | 0.522871716 |
| ENSMUSG000000082755  | 0.674067387  | -0.121969321 | 0.854450423 | 0.355296376 | 0.999071534 | Gm8692        | Gm8692         |               | 0.912340436 | 0.652190488 | 0.673202203 | 0.485674746 | 0.457817931 | 0.363810808 | 0.906014109 | 0.483577167 | 1.492804447 | 1.241820326 |
| ENSMUSG000000028465  | -0.265379136 | 7.870281492  | 0.854399543 | 0.3553107   | 0.999071534 | Tln1          | Tln1           | TLN1          | 221.768906  | 272.0227237 | 289.342307  | 228.1977484 | 316.3521904 | 353.624105  | 109.9512836 | 234.4658434 | 142.7592463 | 213.8545319 |
| ENSMUSG000000035958  | 0.201712515  | 5.510399011  | 0.854360988 | 0.355321556 | 0.999071534 | Tdp2          | Tdp2           | TDP2          | 42.24838019 | 37.88633838 | 44.96990719 | 46.90230403 | 47.08984435 | 45.7673996  | 46.07728896 | 59.89448623 | 40.30572007 | 40.84935282 |
| ENSMUSG000000031529  | -0.451899    | 3.749123443  | 0.854337322 | 0.355328219 | 0.999071534 | Tnks          | Tnks           | TNKS          | 22.52779077 | 32.66881447 | 6.462741153 | 4.717983245 | 14.51936867 | 27.28581057 | 9.319002261 | 10.98410993 | 3.142746204 | 7.777716776 |
| ENSMUSG000000015134  | 0.60807138   | 1.279918032  | 0.8542509   | 0.355352554 | 0.999071534 | Aldh1a3       | Aldh1a3        | ALDH1A3       | 1.263240604 | 1.600831199 | 3.971893    | 2.081463196 | 0.523220493 | 1.746291877 | 1.423736457 | 0.967154334 | 5.892649132 | 2.483640651 |
| ENSMUSG000000019810  | -0.215421197 | 5.312163032  | 0.854062609 | 0.35540558  | 0.999071534 | Fuca2         | Fuca2          | FUCA2         | 44.49414127 | 57.86708334 | 35.61239656 | 35.10734591 | 48.65950583 | 36.01726995 | 39.6704749  | 46.49249046 | 22.3920667  | 33.20235397 |
| ENSMUSG000000092345  | -1.65706636  | -0.227499844 | 0.854010202 | 0.355420341 | 0.999071534 | Gm20503       | Gm20503        | DNAIC25-GNG10 | 2.666841275 | 2.96450222  | 0           | 0           | 0           | 1.964578361 | 0           | 0           | 0           | 0           |
| ENSMUSG000000035992  | 0.300159534  | 6.074732891  | 0.853961519 | 0.355434054 | 0.999071534 | Fnip1         | Fnip1          | FNIP1         | 36.98487768 | 69.90296236 | 76.67773097 | 64.10906645 | 64.48692573 | 40.16471316 | 45.10655956 | 126.7663001 | 68.04045531 | 66.86222069 |
| ENSMUSG000000009621  | -0.246653168 | 4.157788898  | 0.853798684 | 0.355479925 | 0.999071534 | Vav2          | Vav2           | VAV2          | 21.40491023 | 20.75151554 | 19.5228639  | 16.9986161  | 21.38663764 | 28.37724299 | 12.42533635 | 11.88218181 | 11.47102364 | 16.60117698 |
| ENSMUSG000000014932  | 0.223548859  | 5.420313762  | 0.853650319 | 0.355521727 | 0.999071534 | Yes1          | Yes1           | YES1          | 31.86173523 | 38.716399   | 40.25749176 | 47.17983245 | 45.78179312 | 37.69079967 | 53.32540183 | 54.50605494 | 39.91828769 | 33.52914879 |
| ENSMUSG000000022471  | 0.199182579  | 5.433194178  | 0.853315839 | 0.355615992 | 0.999071534 | Xrcc6         | Xrcc6          | XRCC6         | 44.9854015  | 37.23414789 | 42.00781749 | 35.03796381 | 49.57514169 | 59.81049677 | 50.08963715 | 31.57068074 | 34.0202766  | 50.06496681 |
| ENSMUSG000000032582  | 0.223328088  | 5.657927697  | 0.852937064 | 0.355722782 | 0.999071534 | Rbm6          | Rbm6           | RBM6          | 37.82703808 | 50.51511783 | 58.03002993 | 39.68656495 | 55.52677479 | 62.72098323 | 30.41618794 | 51.8118393  | 53.42685847 | 61.89493939 |
| ENSMUSG000000019990  | -0.605724892 | 1.335861243  | 0.852798813 | 0.355761771 | 0.999071534 | Pde7b         | Pde7b          | PDE7B         | 4.35116208  | 5.573264174 | 1.009803305 | 1.734552664 | 2.354492217 | 4.511254014 | 1.941458804 | 1.381649048 | 0.078568655 | 1.960768935 |
| ENSMUSG000000034959  | -0.635473578 | 0.203791906  | 0.852513801 | 0.355842167 | 0.999071534 | 5031414D18Rik | 50314144D18Rik | KIAA0226L     | 2.596661241 | 0.889350666 | 1.077123255 | 0.624438959 | 1.308051232 | 1.164194584 | 0.517722348 | 1.036236786 | 0.864255206 | 0.261435858 |
| ENSMUSG000000021241  | 0.317102838  | 3.841151952  | 0.852479568 | 0.355851825 | 0.999071534 | Isca2         | Isca2          | ISCA2         | 17.40464832 | 14.05174052 | 9.626791509 | 9.366584384 | 15.63121222 | 14.40690798 | 27.50399973 | 17.408778   | 7.621159544 | 9.934562605 |
| ENSMUSG000000028851  | -0.222798336 | 7.101100836  | 0.85243088  | 0.355865562 | 0.999071534 | Nudc          | Nudc           | NUDC          | 154.6767939 | 128.7779765 | 180.6874714 | 142.9271395 | 159.9746657 | 207.226636  | 119.2055706 | 99.75506126 | 84.46130423 | 119.2147513 |
| ENSMUSG000000028553  | 0.81534699   | -0.155867555 | 0.852376324 | 0.355880955 | 0.999071534 | Angptl3       | Angptl3        | ANGPTL3       | 0.701800335 | 0           | 0.605881983 | 1.248877918 | 0.327012808 | 0.291048646 | 0.711868228 | 0.898071881 | 1.571373102 | 1.045743432 |
| ENSMUSG000000001666  | 0.225742017  | 5.86935937   | 0.852252188 | 0.355915984 | 0.999071534 | Ddt           | Ddt            | DDT           | 69.89931341 | 39.13142931 | 45.91239027 | 61.05625376 | 63.04806938 | 47.0771185  | 80.82940156 | 54.09156022 | 49.41968406 | 69.14978445 |
| ENSMUSG000000029190  | -0.199999098 | 5.334350246  | 0.852113706 | 0.355955067 | 0.999071534 | D5Ert d579e   | D5Ert d579e    | KIAA0232      | 46.038102   | 43.04457224 | 47.9993171  | 47.94303563 | 37.60647292 | 51.51561036 | 28.92773619 | 29.98178434 | 31.27032473 | 41.04542971 |
| ENSMUSG0000000040374 | 0.225223551  | 5.88307429   | 0.851174203 | 0.356220373 | 0.999071534 | Pex2          | Pex2           | PEX2          | 76.49623656 | 36.048347   | 58.9051928  | 57.51776633 | 52.84526977 | 62.72098323 | 86.71849326 | 45.93983084 | 45.4912513  | 66.79686172 |
| ENSMUSG000000029613  | -0.225929186 | 4.832308074  | 0.850673486 | 0.356361882 | 0.999071534 | Eif2ak1       | Eif2ak1        | EIF2AK1       | 30.52831459 | 38.95355918 | 32.78494731 | 23.79806255 | 33.22450129 | 42.63862665 | 24.33295035 | 28.32380548 | 15.47802505 | 49.1161246  |
| ENSMUSG000000097464  | 1.187785423  | -0.705626286 | 0.850434859 | 0.356429347 | 0.999071534 | Gm26736       | Gm26736        |               | 0           | 0           | 1.009803305 | 0.555056852 | 0           | 0.072762162 | 0.258861174 | 0.414494714 | 1.885647722 | 0.392153787 |
| ENSMUSG000000074547  | 0.672450737  | 0.585045126  | 0.850408012 | 0.356436939 | 0.999071534 | Gm10712       | Rps8-ps4       |               | 2.245761073 | 1.660121243 | 0.134640441 | 0.693821065 | 0.784830739 | 1.382481069 | 1.423736457 | 3.868617334 | 0.785686551 | 0.653589645 |
| ENSMUSG000000057457  | 0.359414339  | 3.226893542  | 0.85033011  | 0.356458968 | 0.999071534 | Phex          | Phex           | PHEX          | 10.17610486 | 4.743203553 | 9.626791509 | 9.782877023 | 7.521294584 | 5.74821076  | 15.72581632 | 6.493750525 | 9.428238612 | 11.63389568 |
| ENSMUSG000000034853  | -0.778859419 | -0.363699837 | 0.850180682 | 0.356501229 | 0.999071534 | Acot11        | Acot11         | ACOT11        | 0.070180034 | 1.422961066 | 1.413724627 | 0.416292639 | 0.850233301 | 0.727621615 | 0.582437641 | 0.207247357 | 0.15713731  | 0.653589645 |
| ENSMUSG000000087672  | 0.885631813  | -0.110314586 | 0.850071932 | 0.356531989 | 0.999071534 | Gm15122       | Gm15122        |               | 0.631620302 | 1.007930755 | 0.605881983 | 0           | 0.654025616 | 1.164194584 | 0.582437641 | 2.694215643 | 0           | 0.653589645 |
| ENSMUSG000000053411  | 0.361389442  | 2.911739135  | 0.849904145 | 0.356579456 | 0.999071534 | Cbx7          | Cbx7           | CBX7          | 6.667103186 | 7.292675462 | 4.173853661 | 6.452535909 | 9.090956062 | 7.494502637 | 5.112508185 | 13.0565835  | 4.714119306 | 9.803844676 |
| ENSMUSG000000019087  | -0.234507982 | 7.993631309  | 0.849865488 | 0.356590393 | 0.999071534 | Atp6ap1       | Atp6ap1        | ATP6AP1       | 285.1414763 | 334.2179803 | 248.075012  | 272.8798251 | 290.452776  | 271.7666733 | 285.5885901 | 236.1238223 | 142.0512814 | 210.7173016 |
| ENSMUSG000000039166  | 0.282960647  | 4.02623384   | 0.848464847 | 0.356986988 | 0.999071534 | Akap7         | Akap7          | AKAP7         | 10.80772517 | 12.09516906 | 19.32090324 | 14.70900659 | 18.63973005 | 15.28005392 | 10.8721693  | 17.61602536 | 18.5422026  | 21.56845829 |
| ENSMUSG000000034341  | -0.248990038 | 5.992073961  | 0.848329321 | 0.357025395 | 0.999071534 | Wbp2          | Wbp2           | WBP2          | 57.61780754 | 83.24322235 | 67.92610232 | 57.44838422 | 93.13324771 | 62.06612378 | 33.84609849 | 90.08351792 | 34.33450228 | 61.69886249 |
| ENSMUSG000000040624  | -0.476281889 | 1.616272174  | 0.847851832 | 0.357160755 | 0.999071534 | Plek hg1      | Plek hg1       | PLEKHG1       | 2.105401006 | 5.51397413  | 2.221567271 | 4.301690606 | 3.466335765 | 5.020589145 | 2.135604685 | 1.036236786 | 2.435628308 | 1.568615148 |
| ENSMUSG000000022236  | -0.402148347 | 2.531376358  | 0.84764651  | 0.357218982 | 0.999071534 | Ropn1l        | Ropn1l         | ROPN1L        | 8.421604025 | 3.675982753 | 5.789538949 | 9.158438064 | 6.14784079  | 2.473913492 | 5.436084652 | 3.661369977 | 6.128355098 | 4.836563373 |
| ENSMUSG000000002010  | -0.185253361 | 6.300150929  | 0.847278594 | 0.357323352 | 0.999071534 | Idh3g         | Idh3g          | IDH3G         | 85.97054109 | 87.03778519 | 80.78426441 | 86.93577951 | 93.85267589 | 89.27917219 | 78.4349357  | 73.36556444 | 49.41968406 | 69.4112203  |

|                     |              |              |             |             |             |               |               |              |             |             |             |             |             |             |             |             |             |             |
|---------------------|--------------|--------------|-------------|-------------|-------------|---------------|---------------|--------------|-------------|-------------|-------------|-------------|-------------|-------------|-------------|-------------|-------------|-------------|
| ENSMUSG00000004268  | 0.250141377  | 7.032070882  | 0.847000746 | 0.357402199 | 0.999071534 | Emg1          | Emg1          | RP3-461F17.3 | 150.0449117 | 83.00606217 | 137.9391315 | 137.7928636 | 109.5492907 | 132.2088475 | 182.0441206 | 91.32700206 | 144.4877567 | 126.5349553 |
| ENSMUSG000000034647 | 0.35465974   | 6.111529201  | 0.846940311 | 0.357419352 | 0.999071534 | Ankrd12       | Ankrd12       | ANKRD12      | 38.31829831 | 57.09631276 | 81.79406772 | 65.14979805 | 71.22338958 | 40.67404829 | 20.51474803 | 106.0415644 | 92.47530705 | 97.25413918 |
| ENSMUSG000000031955 | -0.19783878  | 6.087558407  | 0.846242037 | 0.357617626 | 0.999071534 | Bcar1         | Bcar1         | BCAR1        | 75.79443623 | 72.21527409 | 86.3718427  | 64.31721277 | 78.35226879 | 96.26433969 | 47.04801836 | 63.69402111 | 47.0626244  | 57.31981187 |
| ENSMUSG000000051124 | -0.47966298  | 1.345691943  | 0.846097438 | 0.357658703 | 0.999071534 | Gimap9        | Gimap9        | GIMAP7       | 3.719541778 | 2.253021687 | 3.231370576 | 2.428373729 | 2.943115272 | 3.783632399 | 3.106334087 | 0.898071881 | 0.707117896 | 1.699333077 |
| ENSMUSG000000034274 | -0.249773428 | 4.95672473   | 0.845467882 | 0.357837622 | 0.999071534 | Thoc5         | Thoc5         | THOC5        | 45.33630167 | 34.03248549 | 30.7653407  | 27.82222473 | 37.21405755 | 49.18722119 | 37.53487022 | 15.9580465  | 15.55659371 | 23.92138101 |
| ENSMUSG000000067369 | 0.215172563  | 4.716910831  | 0.844750638 | 0.358041611 | 0.999071534 | Trmt2b        | Trmt2b        | TRMT2B       | 22.1768906  | 29.34857198 | 21.20586941 | 24.3531194  | 28.71172454 | 26.04885382 | 33.84609849 | 28.11655812 | 21.13496822 | 26.27430373 |
| ENSMUSG000000085035 | 0.884887753  | -0.598917155 | 0.844626577 | 0.358076911 | 0.999071534 | Gm12031       | Gm12031       |              | 0.210540101 | 0.059290044 | 1.009803305 | 0.346910533 | 0.327012808 | 0.363810808 | 0.129430587 | 0.207247357 | 1.257098482 | 1.241820326 |
| ENSMUSG000000026113 | -0.272745684 | 3.916870078  | 0.844474042 | 0.35812032  | 0.999071534 | Inpp4a        | Inpp4a        | INPP4A       | 12.562226   | 19.50642461 | 15.95489222 | 19.28822562 | 17.46248395 | 15.1345296  | 11.64875283 | 19.41216912 | 7.228316269 | 12.81035704 |
| ENSMUSG000000040859 | -0.271661408 | 4.201974207  | 0.84393896  | 0.358272651 | 0.999071534 | Bsdc1         | Bsdc1         | BSDC1        | 18.59770889 | 24.36820825 | 22.21567271 | 12.48877918 | 26.74964769 | 18.55435119 | 12.29590576 | 24.10977589 | 8.956826681 | 16.92797181 |
| ENSMUSG000000053877 | -0.403074064 | 5.046604874  | 0.843316191 | 0.358450058 | 0.999071534 | Srcap         | Srcap         | SRCAP        | 41.40621979 | 53.30174992 | 22.28299293 | 39.89471127 | 37.8026806  | 66.79566428 | 20.57946333 | 34.33397884 | 2.749902928 | 23.92138101 |
| ENSMUSG000000020739 | 0.245017766  | 5.829292882  | 0.843096215 | 0.358512751 | 0.999071534 | Nup85         | Nup85         | NUP85        | 73.54867515 | 45.5347541  | 57.62610861 | 43.29443449 | 50.42537499 | 92.26242081 | 88.46580619 | 30.46536151 | 45.96266323 | 47.05845444 |
| ENSMUSG000000014633 | -0.219425533 | 5.417464834  | 0.843089857 | 0.358514563 | 0.999071534 | Cmc2          | Cmc2          | CMC2         | 62.95149009 | 35.63331669 | 42.34441859 | 50.78770199 | 46.17420849 | 42.78415098 | 44.07111486 | 34.47214374 | 21.60638015 | 49.93424888 |
| ENSMUSG000000028684 | -0.227626806 | 4.963449709  | 0.842327667 | 0.358731905 | 0.999071534 | Urod          | Urod          | UROD         | 46.66972231 | 33.67674522 | 24.63920065 | 35.31549223 | 33.87852691 | 27.7951457  | 38.63503021 | 27.14940379 | 16.49941757 | 29.2808161  |
| ENSMUSG000000054128 | -0.578431839 | 0.925477802  | 0.842289983 | 0.358742655 | 0.999071534 | H2-T3         | H2-T3         |              | 3.298461576 | 2.490181865 | 3.231370576 | 0.763203172 | 1.24264867  | 2.764962138 | 2.394465859 | 0.967154334 | 0.628549241 | 0.392153787 |
| ENSMUSG000000002565 | -0.32053293  | 3.553970458  | 0.842171152 | 0.358776558 | 0.999071534 | Scin          | Scin          | SCIN         | 18.31698875 | 17.72772328 | 7.943786    | 10.12978756 | 13.21131744 | 11.86023233 | 14.43151045 | 8.980718811 | 4.085570065 | 11.69925465 |
| ENSMUSG000000079685 | 0.605533463  | 3.180087034  | 0.841953167 | 0.358838761 | 0.999071534 | Ulbp1         | Ulbp1         |              | 10.52700503 | 15.3561215  | 1.615685288 | 2.636520049 | 7.063476652 | 26.33990247 | 22.39149154 | 3.868617334 | 1.649941757 | 2.548999616 |
| ENSMUSG000000093606 | 0.504967676  | 1.065080115  | 0.841870839 | 0.358862257 | 0.999071534 | B130034C11Rik | B130034C11Rik |              | 1.543960738 | 1.304380977 | 1.346404407 | 2.775284262 | 1.373453794 | 1.746291877 | 1.359021163 | 4.214029596 | 1.807079067 | 1.830051006 |
| ENSMUSG000000040875 | -0.636402843 | 0.86260454   | 0.841844492 | 0.358869777 | 0.999071534 | Osbpl10       | Osbpl10       | OSBPL10      | 3.228281543 | 1.541541155 | 2.086926831 | 2.567137942 | 1.177246109 | 3.783632399 | 0.970729402 | 0.27632981  | 1.492804447 | 0.196076894 |
| ENSMUSG000000024790 | -0.289493902 | 4.104353413  | 0.841657663 | 0.358923108 | 0.999071534 | Sac3d1        | Sac3d1        | SAC3D1       | 24.14193154 | 9.427117061 | 23.69671756 | 19.98204669 | 20.14398897 | 26.8492376  | 17.34369865 | 11.19135729 | 10.60676844 | 10.65351121 |
| ENSMUSG000000025321 | -0.343693416 | 4.043212639  | 0.841641349 | 0.358927766 | 0.999071534 | Itgb8         | Itgb8         | ITGB8        | 8.842684226 | 16.71979252 | 15.75293156 | 24.00620887 | 29.23494503 | 12.22404314 | 7.377543457 | 20.37932346 | 16.89226085 | 10.58815225 |
| ENSMUSG000000036873 | 0.229029964  | 4.90516899   | 0.841532109 | 0.358958954 | 0.999071534 | 2410004B18Rik | 2410004B18Rik | C1orf52      | 28.77381375 | 20.45506532 | 27.60129034 | 36.56437015 | 28.51551686 | 30.85115649 | 44.6535525  | 27.84022831 | 21.60638015 | 31.1108671  |
| ENSMUSG000000039285 | 0.181935738  | 5.795544415  | 0.840696704 | 0.359197589 | 0.999071534 | Azi2          | Azi2          | AZI2         | 49.54710368 | 53.77607028 | 58.5685917  | 46.00033664 | 62.13243352 | 67.52328589 | 59.60278529 | 56.3021987  | 50.59821388 | 50.52247956 |
| ENSMUSG000000027782 | 0.239360209  | 7.443816853  | 0.840442386 | 0.359270279 | 0.999071534 | Kpna4         | Kpna4         | KPNA4        | 169.414601  | 175.6764016 | 149.1142881 | 159.8563735 | 174.8864497 | 236.9863601 | 274.0692679 | 133.5363805 | 142.4449717 | 134.0512362 |
| ENSMUSG000000027342 | 0.259444266  | 8.124256767  | 0.840343381 | 0.359298582 | 0.999071534 | Pcna          | Pcna          | PCNA         | 307.1078268 | 180.0045748 | 297.2187728 | 264.6927365 | 268.1505025 | 365.9209103 | 432.427591  | 210.3560675 | 240.8192979 | 230.7171447 |
| ENSMUSG000000043068 | -0.666782445 | 0.231227397  | 0.839937079 | 0.359414767 | 0.999071534 | Fam89a        | Fam89a        | FAM89A       | 0.771980369 | 0.652190488 | 2.558168373 | 2.01208109  | 0.523220493 | 1.528005392 | 1.164875283 | 0.414494714 | 0.235705965 | 0.71894861  |
| ENSMUSG000000066270 | -0.661411078 | 5.706401208  | 0.83987371  | 0.359432892 | 0.999071534 | Gm10157       | Gm10157       |              | 93.19908454 | 111.1095432 | 34.40063259 | 31.98515112 | 64.09451036 | 69.19681561 | 72.67527458 | 44.14368708 | 0           | 21.96061207 |
| ENSMUSG000000019988 | 0.203780405  | 5.584656526  | 0.839633942 | 0.359501485 | 0.999071534 | Nedd1         | Nedd1         | NEDD1        | 51.37178455 | 43.34102246 | 46.04703071 | 40.03347548 | 50.68698524 | 59.15563732 | 73.77543457 | 37.99534882 | 38.02722907 | 40.65327592 |
| ENSMUSG000000037995 | 0.250050543  | 5.305866371  | 0.839597032 | 0.359512045 | 0.999071534 | Igsf9         | Igsf9         | IGSF9        | 34.59875654 | 30.77153305 | 42.07513771 | 32.05453323 | 47.87467509 | 43.94834556 | 23.10335977 | 67.9080507  | 31.89887397 | 39.2153787  |
| ENSMUSG000000021696 | 0.306065929  | 3.765797418  | 0.839548216 | 0.359526013 | 0.999071534 | Elov17        | Elov17        | ELOVL7       | 16.56248792 | 8.182026128 | 7.068623136 | 13.39074656 | 17.46248395 | 13.16995124 | 17.02012219 | 10.50053276 | 15.63516236 | 14.37897219 |
| ENSMUSG000000044068 | 0.329318645  | 4.750066951  | 0.839372785 | 0.359576216 | 0.999071534 | Zrsr1         | Zrsr1         | ZRSR2        | 13.61492651 | 23.77530781 | 30.7653407  | 23.3123878  | 31.65483981 | 14.98900527 | 13.65492692 | 46.49249046 | 27.57759794 | 36.53566116 |
| ENSMUSG000000074030 | 0.234868567  | 4.462635985  | 0.83848993  | 0.359829009 | 0.999071534 | Exoc8         | Exoc8         | EXOC8        | 17.89590855 | 20.04003501 | 21.20586941 | 23.72868044 | 21.32123508 | 32.16087539 | 16.8259763  | 16.44162367 | 22.70634132 | 26.86253441 |
| ENSMUSG000000043872 | 0.350134509  | 3.490847744  | 0.838460683 | 0.359837388 | 0.999071534 | Zmym1         | Zmym1         | ZMYM1        | 10.6673651  | 6.225454663 | 13.73332495 | 13.94580342 | 5.690022859 | 19.50025929 | 18.63800452 | 9.326131073 | 6.599767028 | 8.169870563 |
| ENSMUSG000000068674 | 0.409947597  | 2.030790622  | 0.838427985 | 0.359846755 | 0.999071534 | Gm10247       | Gm10247       |              | 3.719541778 | 2.134441599 | 3.029409915 | 4.995511672 | 3.662543449 | 2.910486461 | 5.953807    | 3.730452429 | 4.792687961 | 3.856178906 |
| ENSMUSG000000031161 | 0.237317786  | 5.743692863  | 0.837843266 | 0.360014327 | 0.999071534 | Hdac6         | Hdac6         | HDAC6        | 42.38874026 | 44.46753331 | 51.43264834 | 47.45736088 | 69.26131273 | 49.551032   | 32.16350086 | 62.86503168 | 62.14780618 | 65.94719519 |
| ENSMUSG000000027160 | 0.315497665  | 6.302700144  | 0.837781845 | 0.360031936 | 0.999071534 | Ccdc34        | Ccdc34        | CCDC34       | 49.19620351 | 29.70431225 | 109.3280378 | 97.41247759 | 75.73616633 | 66.06804266 | 64.39171701 | 68.39162787 | 118.4815319 | 87.77708933 |
| ENSMUSG000000039148 | -0.221994594 | 6.256390575  | 0.837601945 | 0.360083518 | 0.999071534 | Sart1         | Sart1         | SART1        | 78.6718176  | 78.50001879 | 104.0770606 | 77.56919512 | 87.77023766 | 99.90244777 | 38.63503021 | 59.2036617  | 67.80474935 | 76.53534744 |
| ENSMUSG000000039852 | -0.259196578 | 5.75527468   | 0.836916738 | 0.360280077 | 0.999071534 | Rere          | Rere          | RERE         | 39.79207902 | 64.38898823 | 66.98361924 | 60.84810744 | 72.40063569 | 52.09770765 | 21.48547744 | 69.98052428 | 35.5130321  | 57.71196566 |
| ENSMUSG000000049624 | 0.274793064  | 4.421713915  | 0.836478639 | 0.360405828 | 0.999071534 | Slc17a5       | Slc17a5       | SLC17A5      | 16.56248792 | 17.07553279 | 25.24508263 | 22.06350988 | 18.70513262 | 16.29872418 | 19.67344922 | 22.58996193 | 31.50603069 | 17.84299731 |
| ENSMUSG000000075307 | -1.234855593 | -0.366909243 | 0.836466347 | 0.360409357 | 0.999071534 | Klhl41        | Klhl41        | KLHL41       | 2.737021308 | 0.118580089 | 1.88496617  | 0.069382107 | 0           | 0           | 0.064715293 | 0           | 1.099961171 | 0.457512752 |

|                    |              |              |             |             |             |               |               |           |             |             |              |             |             |             |             |             |             |              |
|--------------------|--------------|--------------|-------------|-------------|-------------|---------------|---------------|-----------|-------------|-------------|--------------|-------------|-------------|-------------|-------------|-------------|-------------|--------------|
| ENSMUSG00000082978 | 0.592228538  | 0.43255221   | 0.83636946  | 0.360437176 | 0.999071534 | Rpsa-ps11     | Rpsa-ps11     |           | 0.771980369 | 1.719411288 | 0.942483085  | 0.832585279 | 0.784830739 | 0.582097292 | 2.394465859 | 1.036236786 | 1.885647722 | 0.915025503  |
| ENSMUSG00000042607 | 0.580893306  | 1.30595008   | 0.836354599 | 0.360441443 | 0.999071534 | Asb4          | Asb4          | ASB4      | 1.965040939 | 2.312311732 | 2.894769475  | 1.942698983 | 0.588623054 | 2.837724299 | 3.753487022 | 0.207247357 | 3.064177549 | 3.594743048  |
| ENSMUSG00000036622 | -0.247481685 | 4.873071849  | 0.836268651 | 0.360460897 | 0.999071534 | Atp13a2       | Atp13a2       | ATP13A2   | 38.94991862 | 38.41994878 | 30.22677893  | 24.90817625 | 32.63587824 | 52.60704278 | 27.37456914 | 18.51409724 | 13.04239675 | 24.05209894  |
| ENSMUSG00000059540 | 0.428125433  | 1.97247013   | 0.836252931 | 0.360470638 | 0.999071534 | Tcea2         | Tcea2         | TCEA2     | 3.579181711 | 2.01586151  | 4.510454763  | 3.81601586  | 2.812310149 | 3.492583753 | 2.394465859 | 3.523205072 | 3.614158135 | 7.777716776  |
| ENSMUSG00000026500 | 0.272799831  | 4.913265406  | 0.836239936 | 0.360474737 | 0.999071534 | Cox20         | Cox20         | COX20     | 22.52779077 | 17.78701332 | 33.79475061  | 34.69105327 | 31.52403469 | 20.51892955 | 22.71506801 | 37.5808541  | 30.40606952 | 43.33299347  |
| ENSMUSG00000007564 | -0.236392624 | 7.521825285  | 0.836091785 | 0.36051692  | 0.999071534 | Ppp2r1a       | Ppp2r1a       | PPP2R1A   | 228.2254691 | 249.7889571 | 198.1907287  | 139.5274163 | 221.387671  | 266.236749  | 174.7960077 | 154.6065285 | 101.824977  | 141.8943119  |
| ENSMUSG00000018339 | 0.34794911   | 4.273895358  | 0.835779151 | 0.360606733 | 0.999071534 | Gpx3          | Gpx3          | GPX3      | 19.86094949 | 15.53399163 | 20.66730764  | 16.51294136 | 15.17339429 | 26.04885382 | 46.85387248 | 6.839162787 | 10.92104306 | 16.07830527  |
| ENSMUSG00000021203 | -0.421388185 | 1.449158143  | 0.835702736 | 0.36062869  | 0.999071534 | Otub2         | Otub2         | OTUB2     | 3.36864161  | 4.150303108 | 2.827449254  | 1.942698983 | 3.204725518 | 2.910486461 | 1.617882337 | 1.796143762 | 1.964216377 | 2.483640651  |
| ENSMUSG00000020397 | 0.238212057  | 5.501144929  | 0.83502618  | 0.360823171 | 0.999071534 | Med7          | Med7          | MED7      | 41.54657986 | 29.17070185 | 55.80846266  | 55.0893926  | 31.91645006 | 40.67404829 | 42.6473784  | 46.63065537 | 50.0482333  | 51.17606921  |
| ENSMUSG00000082535 | -0.748209139 | -0.188196883 | 0.834990381 | 0.360833466 | 0.999071534 | Gm7860        | Gm7860        |           | 0.771980369 | 0.237160178 | 1.413724627  | 1.387642131 | 0.981038424 | 0.873145938 | 0.970729402 | 0.690824524 | 0.15713731  | 0.065358965  |
| ENSMUSG00000020709 | -0.547826386 | 1.692470103  | 0.834819687 | 0.360882558 | 0.999071534 | Adap2         | Adap2         | ADAP2     | 5.403862583 | 6.640484974 | 2.221567271  | 2.775284262 | 2.092881971 | 6.475832375 | 3.17104938  | 1.796143762 | 1.178529826 | 0.392153787  |
| ENSMUSG00000008475 | 0.266223189  | 8.580839384  | 0.834524575 | 0.360967455 | 0.999071534 | Arpc5         | Arpc5         | ARPC5     | 428.4491048 | 315.4230362 | 347.3050167  | 351.004077  | 363.0496194 | 451.1981636 | 713.8096871 | 288.0738265 | 268.0762512 | 322.154336   |
| ENSMUSG00000029213 | 0.212766138  | 6.04010967   | 0.83411717  | 0.361084702 | 0.999071534 | Commnd8       | Commnd8       | COMMND8   | 57.1265473  | 53.06458974 | 63.68492844  | 72.0186266  | 68.99970248 | 55.95410221 | 86.78320856 | 57.96017756 | 66.39051356 | 67.84260516  |
| ENSMUSG00000022474 | -0.21557957  | 5.400629905  | 0.833966994 | 0.361127934 | 0.999071534 | Pmm1          | Pmm1          | PMM1      | 43.23090066 | 41.50303108 | 46.45095204  | 51.34275885 | 51.92963391 | 35.14412402 | 28.7335903  | 44.76542915 | 26.71334273 | 52.41788953  |
| ENSMUSG00000027656 | -0.258294056 | 5.821670104  | 0.83374454  | 0.361191986 | 0.999071534 | Wisp2         | Wisp2         | WISP2     | 64.21473069 | 78.08498848 | 83.54439344  | 50.8570841  | 42.51166504 | 34.85307537 | 34.6873973  | 75.43803801 | 46.51264382 | 50.58783853  |
| ENSMUSG00000018819 | -0.203792802 | 5.953190556  | 0.833444633 | 0.361278365 | 0.999071534 | Lsp1          | Lsp1          | LSP1      | 66.67103186 | 64.44827827 | 92.76726363  | 62.513278   | 56.83482603 | 76.03645879 | 41.09421136 | 58.99641434 | 46.04123189 | 57.84268359  |
| ENSMUSG00000038886 | -0.193935783 | 5.572384705  | 0.83338952  | 0.361294242 | 0.999071534 | Man2a2        | Man2a2        | MAN2A2    | 51.79286475 | 58.16353356 | 49.68232261  | 48.15118194 | 55.39596967 | 61.77507513 | 30.48090323 | 45.11084141 | 30.7989128  | 49.28065924  |
| ENSMUSG00000090136 | 0.283810434  | 8.353559682  | 0.833277836 | 0.361326418 | 0.999071534 | Gm10177       | Gm10177       |           | 389.2886461 | 218.898844  | 282.8795659  | 391.0375525 | 241.0084395 | 222.5066899 | 405.3118831 | 293.7385876 | 387.1863323 | 371.957867   |
| ENSMUSG00000021288 | -0.200635896 | 6.209350212  | 0.833150402 | 0.361363137 | 0.999071534 | Klc1          | Klc1          | KLC1      | 94.53250518 | 68.48000129 | 74.65812436  | 72.64306556 | 100.9815551 | 98.66549102 | 80.24696391 | 57.13118813 | 44.15558417 | 59.60737563  |
| ENSMUSG00000018340 | -0.290890994 | 7.034814325  | 0.832507744 | 0.36154839  | 0.999071534 | Anxa6         | Anxa6         | ANXA6     | 146.8166302 | 169.3323668 | 160.82800064 | 124.5408813 | 148.3330097 | 288.0653975 | 88.53052148 | 96.30093864 | 45.41268265 | 93.92083199  |
| ENSMUSG00000036138 | -0.20826539  | 5.531374755  | 0.832432881 | 0.361569978 | 0.999071534 | Acaa1a        | Acaa1a        | ACAA1     | 68.77643287 | 49.21073686 | 43.0176208   | 53.42422204 | 42.18465223 | 60.97469136 | 49.05419246 | 35.71562789 | 24.82769501 | 41.50294246  |
| ENSMUSG00000021840 | 0.192650408  | 6.810875753  | 0.832066871 | 0.361675552 | 0.999071534 | Mapk1ip1l     | Mapk1ip1l     | MAPK1IP1L | 110.7440929 | 113.0661147 | 107.5103919  | 96.09421757 | 116.8743776 | 144.2146041 | 100.5028508 | 116.6802621 | 95.77519056 | 123.4630839  |
| ENSMUSG00000040918 | 0.325253572  | 3.239334433  | 0.831841697 | 0.361740523 | 0.999071534 | Slc19a2       | Slc19a2       | SLC19A2   | 11.15862533 | 9.01208675  | 4.173853661  | 8.187088573 | 10.52981242 | 10.91432423 | 15.14337867 | 7.806317121 | 7.6997282   | 8.692742279  |
| ENSMUSG00000019699 | -0.29056644  | 4.805831641  | 0.831821301 | 0.361746409 | 0.999071534 | Akt3          | Akt3          | AKT3      | 29.33525402 | 57.57063312 | 17.77253817  | 19.14946141 | 36.42922681 | 29.83248622 | 29.57488912 | 31.43251584 | 11.94243557 | 20.522771485 |
| ENSMUSG00000049092 | -0.556459895 | 0.933360506  | 0.831636148 | 0.361799846 | 0.999071534 | Gpr137c       | Gpr137c       | GPRI37C   | 1.19306057  | 2.905212176 | 1.88496617   | 2.567137942 | 2.354492217 | 0.509335131 | 0.776583522 | 2.279720929 | 0.628549241 | 2.61435858   |
| ENSMUSG00000041817 | 0.796157832  | -0.433705869 | 0.83150992  | 0.361836283 | 0.999071534 | Fam169a       | Fam169a       | FAM169A   | 0.701800335 | 0.711480533 | 0.403921322  | 0           | 0.523220493 | 1.091432423 | 0.776583522 | 0.138164905 | 1.021392516 | 0.71894861   |
| ENSMUSG00000002076 | 0.591136966  | 0.337529104  | 0.831467666 | 0.361848481 | 0.999071534 | Hsf2bp        | Hsf2bp        | HSF2BP    | 1.473780704 | 0.770770577 | 0.471241542  | 0.971349492 | 1.046440986 | 0.727621615 | 1.164875283 | 1.243484143 | 2.121353688 | 1.045743432  |
| ENSMUSG00000039501 | -0.231969641 | 4.753139341  | 0.831227056 | 0.361917953 | 0.999071534 | Znfx1         | Znfx1         | ZNFX1     | 29.47561409 | 35.92976691 | 22.48495359  | 28.44666369 | 34.4017474  | 41.25614558 | 15.9199622  | 25.14601267 | 16.42084892 | 23.92138101  |
| ENSMUSG00000066057 | 0.355480187  | 2.850508014  | 0.830840173 | 0.362029697 | 0.999071534 | Gm1976        | Gm1976        |           | 3.789721811 | 4.98036373  | 6.664701814  | 10.12978756 | 6.344048475 | 9.968416129 | 5.177223478 | 7.322739954 | 8.092571475 | 7.712357812  |
| ENSMUSG00000024948 | -0.23474778  | 4.218247095  | 0.830786902 | 0.362045087 | 0.999071534 | Map4k2        | Map4k2        | MAP4K2    | 23.8612114  | 18.91352417 | 22.55227381  | 18.66378666 | 19.81697616 | 21.46483765 | 11.19574577 | 15.61263424 | 14.77090716 | 19.28089453  |
| ENSMUSG00000052270 | -0.327505415 | 3.439875243  | 0.830652426 | 0.362083941 | 0.999071534 | Fpr2          | Fpr2          | FPR2      | 21.89617047 | 9.367827016 | 9.559471289  | 13.32136446 | 7.78290483  | 9.895653967 | 13.59021163 | 8.842553906 | 5.566943167 | 8.365947457  |
| ENSMUSG00000035239 | 0.556500591  | 1.791459813  | 0.830391542 | 0.362159335 | 0.999071534 | Neu3          | Neu3          | NEU3      | 2.737021308 | 4.802493597 | 2.423527932  | 0.416292639 | 3.858751134 | 1.8918162   | 2.588611739 | 1.934308667 | 7.464022234 | 3.986896835  |
| ENSMUSG00000029034 | 0.1865747    | 5.628270389  | 0.829199861 | 0.362504    | 0.999071534 | Cpsf3l        | Cpsf3l        | CPSF3L    | 60.98644915 | 41.62161117 | 45.57578917  | 44.05763766 | 47.74386997 | 65.63146969 | 59.73221588 | 43.2456152  | 38.26293503 | 49.80353095  |
| ENSMUSG00000090069 | 0.706415525  | -0.14493831  | 0.829155127 | 0.362516947 | 0.999071534 | E430024P14Rik | E430024P14Rik |           | 0.98252047  | 0.889350666 | 0.134640441  | 0.20814632  | 0.850233301 | 0.582097292 | 1.035444696 | 0.690824524 | 0.471411931 | 1.830051006  |
| ENSMUSG00000034724 | -0.19447848  | 5.536522319  | 0.828790867 | 0.362622396 | 0.999071534 | Cnot6l        | Cnot6l        | CNOT6L    | 49.40674361 | 58.45998379 | 41.53657595  | 52.59163676 | 54.41493125 | 57.77315625 | 48.86004658 | 43.3837801  | 28.20614718 | 33.98666154  |
| ENSMUSG00000035984 | 0.882095146  | -0.31608939  | 0.828251325 | 0.362778664 | 0.999071534 | Nme5          | Nme5          | NME5      | 0.140360067 | 0.889350666 | 0            | 0.346910533 | 1.111843547 | 0.072762162 | 0.582437641 | 1.036236786 | 1.257098482 | 1.045743432  |
| ENSMUSG00000057637 | -0.238644903 | 5.226270007  | 0.828102712 | 0.362821724 | 0.999071534 | Prdm2         | Prdm2         | PRDM2     | 36.77433758 | 61.30590592 | 34.87187414  | 37.18880911 | 39.76475745 | 54.35333466 | 18.8321504  | 37.92626636 | 23.0991846  | 35.1631229   |
| ENSMUSG00000039753 | 0.241066364  | 7.047761786  | 0.827976887 | 0.362858186 | 0.999071534 | Fbxl5         | Fbxl5         | FBXL5     | 133.973684  | 158.2451285 | 101.5188923  | 120.3085728 | 115.3701187 | 99.39311264 | 174.9901536 | 167.5940295 | 123.4313572 | 113.2017265  |
| ENSMUSG00000020056 | 0.215296291  | 5.838621961  | 0.827962437 | 0.362862374 | 0.999071534 | Ccdc53        | Ccdc53        | CCDC53    | 60.98644915 | 46.54268486 | 47.73003622  | 54.25680732 | 65.07554879 | 43.00243746 | 81.80013096 | 63.83218601 | 49.10540944 | 54.37865847  |

|                     |              |              |             |             |             |               |               |          |             |             |             |             |             |             |             |             |             |             |
|---------------------|--------------|--------------|-------------|-------------|-------------|---------------|---------------|----------|-------------|-------------|-------------|-------------|-------------|-------------|-------------|-------------|-------------|-------------|
| ENSMUSG00000004561  | 0.27280742   | 4.27570567   | 0.827946037 | 0.362867127 | 0.999071534 | Mettl17       | Mettl17       | METTL17  | 21.26455016 | 9.308536972 | 24.23527932 | 16.929234   | 18.70513262 | 19.06368632 | 16.50239984 | 16.92520084 | 22.3920667  | 24.90176548 |
| ENSMUSG000000023830 | -0.217312795 | 6.373671654  | 0.827890687 | 0.362883169 | 0.999071534 | Igf2r         | Igf2r         | IGF2R    | 63.79365049 | 127.7700457 | 73.78296149 | 82.21779626 | 115.5009238 | 98.66549102 | 70.73381577 | 86.28398304 | 49.65539002 | 70.06480995 |
| ENSMUSG000000069729 | 0.275759162  | 5.539010833  | 0.827845738 | 0.362896197 | 0.999071534 | Arid1b        | Arid1b        | ARID1B   | 25.89643238 | 38.00491846 | 53.18297407 | 50.09388093 | 49.57514169 | 51.22456171 | 22.39149154 | 49.1867061  | 65.68339566 | 49.73817199 |
| ENSMUSG000000027313 | 0.479221596  | 2.399877808  | 0.827783349 | 0.362914281 | 0.999071534 | Chac1         | Chac1         | CHAC1    | 4.35116208  | 9.604987194 | 2.154247051 | 1.318260024 | 5.166802366 | 4.365729691 | 2.329750565 | 7.046410144 | 6.914041649 | 7.385562989 |
| ENSMUSG000000020411 | 0.892834659  | 0.01381562   | 0.827731329 | 0.36292936  | 0.999071534 | Nipa4         | Nipa4         | NIPAL4   | 0           | 0.474320355 | 1.683005509 | 0.485674746 | 0.523220493 | 2.692199976 | 1.29430587  | 0.690824524 | 1.099961171 | 0           |
| ENSMUSG000000041471 | -0.312331175 | 2.920582586  | 0.827014823 | 0.363137147 | 0.999071534 | Fam35a        | Fam35a        | FAM35A   | 7.579443623 | 11.26510844 | 7.607184899 | 8.187088573 | 8.109917638 | 8.003837767 | 7.183397576 | 4.490359406 | 5.656943167 | 6.862691273 |
| ENSMUSG000000055912 | -0.310606109 | 3.373144197  | 0.82620517  | 0.363372144 | 0.999071534 | Tmem150a      | Tmem150a      | TMEM150A | 7.018003354 | 12.45090933 | 13.32940363 | 14.91715291 | 10.66061754 | 11.3508972  | 5.500799946 | 10.84594503 | 6.835472994 | 9.86920364  |
| ENSMUSG000000031601 | 0.199181663  | 6.345905537  | 0.826034554 | 0.363421691 | 0.999071534 | Cnot7         | Cnot7         | CNOT7    | 66.5306718  | 83.12464226 | 76.27380965 | 83.88296682 | 81.94940968 | 75.09055069 | 83.80630506 | 99.89322616 | 72.51886866 | 83.33267974 |
| ENSMUSG000000021400 | 0.201956392  | 5.458618351  | 0.825894855 | 0.363462267 | 0.999071534 | Wrmp1         | Wrmp1         | WRNP1    | 37.47613791 | 33.380295   | 49.48036195 | 47.11045035 | 43.55810602 | 54.35333466 | 44.91241367 | 33.85040167 | 42.74134837 | 50.58783853 |
| ENSMUSG000000085105 | 0.619145355  | 0.24387079   | 0.825735261 | 0.363508629 | 0.999071534 | Gm12758       | Gm12758       |          | 1.543960738 | 0.5336104   | 0.942483085 | 0.416292639 | 0.915635862 | 0.582097292 | 0.970729402 | 2.279720929 | 0.785686551 | 1.437897219 |
| ENSMUSG000000026241 | -0.707761272 | 0.764050131  | 0.825268738 | 0.3636442   | 0.999071534 | Nppc          | Nppc          | NPPC     | 3.719541778 | 2.371601776 | 1.95228639  | 0.901967385 | 1.177246109 | 0.291048646 | 1.100159989 | 2.970545453 | 0           | 1.30717929  |
| ENSMUSG000000021806 | -0.256397775 | 5.091029703  | 0.825079318 | 0.363699266 | 0.999071534 | Nid2          | Nid2          | NID2     | 22.31725067 | 57.8077933  | 42.07513771 | 26.78149313 | 43.55810602 | 40.89233478 | 20.8383245  | 36.75186467 | 17.91365336 | 35.88207151 |
| ENSMUSG000000074476 | 0.324353642  | 3.937376616  | 0.824881324 | 0.363756836 | 0.999071534 | Spc24         | Spc24         | SPC24    | 19.08896912 | 6.46261484  | 17.57057751 | 14.63962448 | 12.16487646 | 21.39207549 | 27.63343032 | 9.740625788 | 13.43524002 | 10.32671639 |
| ENSMUSG000000024691 | 0.356040814  | 4.861807019  | 0.824812117 | 0.363776962 | 0.999071534 | Fam111a       | Fam111a       | FAM111A  | 35.37073691 | 29.28928194 | 19.99410544 | 17.69243717 | 30.41219114 | 66.43185347 | 57.79075708 | 10.98410993 | 10.92104306 | 21.43774036 |
| ENSMUSG000000043702 | 0.220043664  | 4.588656924  | 0.824591407 | 0.363841157 | 0.999071534 | Pde12         | Pde12         | PDE12    | 21.7558104  | 17.84630337 | 27.19736902 | 26.22643628 | 21.32123508 | 33.32506998 | 26.14497857 | 20.44840591 | 19.48502646 | 26.47038062 |
| ENSMUSG000000091183 | 0.373380437  | 2.070088291  | 0.823969539 | 0.364022116 | 0.999071534 | Gm5141        | Gm5141        |          | 2.737021308 | 3.260952442 | 3.635291898 | 4.02416218  | 4.708984435 | 4.511254014 | 4.594785837 | 3.315957715 | 4.949825271 | 4.509768551 |
| ENSMUSG000000096950 | 0.724592753  | -0.195959096 | 0.823708961 | 0.36409798  | 0.999071534 | Gm9530        | Gm9530        |          | 0.491260235 | 0.474320355 | 0.875162864 | 0.20814632  | 0.915635862 | 0.509335131 | 0.19414588  | 1.105319238 | 1.728510412 | 0.71894861  |
| ENSMUSG000000033871 | 0.729452764  | 0.31534713   | 0.823672605 | 0.364108566 | 0.999071534 | Ppargc1b      | Ppargc1b      | PPARGC1B | 1.824680872 | 0.296450222 | 0.807842644 | 1.318260024 | 0.065402562 | 2.40115133  | 2.006174098 | 0.207247357 | 1.021392516 | 1.30717929  |
| ENSMUSG000000035578 | 0.654895741  | 0.03106906   | 0.823611815 | 0.364126268 | 0.999071534 | Iqcg          | Iqcg          | IQCG     | 0.350900168 | 0.948640711 | 0.807842644 | 0.763203172 | 0.719428178 | 0.654859454 | 1.48845175  | 0.27632981  | 1.571373102 | 1.111102397 |
| ENSMUSG000000024909 | -0.213419478 | 7.511140818  | 0.823352625 | 0.364201757 | 0.999071534 | Efemp2        | Efemp2        | EFEMP2   | 205.4871382 | 228.9188615 | 177.2541402 | 205.787328  | 198.3659693 | 195.7302145 | 161.0763655 | 170.4954925 | 122.2528273 | 171.6979998 |
| ENSMUSG000000084844 | 1.068975577  | -0.668123035 | 0.823294347 | 0.364218734 | 0.999071534 | Hoxb3os       | Hoxb3os       |          | 0.140360067 | 0           | 1.211763966 | 0.277528426 | 0.065402562 | 0.509335131 | 0.19414588  | 0           | 1.414235792 | 1.045743432 |
| ENSMUSG000000015112 | 0.32373121   | 4.130359456  | 0.823287028 | 0.364220866 | 0.999071534 | Slc25a13      | Slc25a13      | SLC25A13 | 23.79103137 | 9.427117061 | 13.32940363 | 20.60648565 | 12.68809695 | 31.79706459 | 24.52709623 | 7.184575049 | 11.78529826 | 21.43774036 |
| ENSMUSG000000031284 | 0.276459323  | 5.503111936  | 0.82303256  | 0.364295006 | 0.999071534 | Pak3          | Pak3          | PAK3     | 32.98461576 | 21.70015625 | 55.47186156 | 51.06523042 | 50.03295962 | 34.99859969 | 33.06951497 | 47.25239744 | 56.64800033 | 59.60737563 |
| ENSMUSG000000018377 | 0.222181598  | 6.130745842  | 0.822857482 | 0.364346028 | 0.999071534 | VeZF1         | VeZF1         | VEZF1    | 50.52962415 | 73.75681524 | 74.4561637  | 52.66101887 | 84.69631727 | 66.65013995 | 56.82002767 | 92.70865111 | 75.11163427 | 65.3589645  |
| ENSMUSG000000028656 | -0.244351419 | 8.234545296  | 0.822697542 | 0.364392647 | 0.999071534 | Cap1          | Cap1          | CAP1     | 309.8448481 | 402.3422413 | 294.9298853 | 254.4935668 | 441.8597061 | 402.2292289 | 257.2432916 | 290.2153825 | 166.0155682 | 248.625501  |
| ENSMUSG000000028614 | 0.241351235  | 5.821517112  | 0.822146489 | 0.364553329 | 0.999071534 | Ndc1          | Ndc1          | NDC1     | 71.30291408 | 54.01323045 | 48.33591821 | 47.94303563 | 47.41685716 | 87.31459383 | 92.54286968 | 32.12334036 | 47.7697423  | 41.11078867 |
| ENSMUSG000000030980 | 0.279958032  | 6.408194576  | 0.82198846  | 0.364599428 | 0.999071534 | Knop1         | Knop1         | KNOP1    | 57.05636727 | 50.04079748 | 109.058757  | 102.0610787 | 76.39019194 | 81.1298101  | 56.5611665  | 69.91144182 | 121.9385527 | 104.6397022 |
| ENSMUSG000000030979 | 0.365904694  | 3.485428825  | 0.821876965 | 0.364631956 | 0.999071534 | Uros          | Uros          | UROS     | 13.40438641 | 7.411255551 | 8.213066882 | 13.87642131 | 6.998074091 | 12.00575665 | 18.37914335 | 4.421276953 | 7.228316269 | 18.88874074 |
| ENSMUSG000000030513 | -0.756990143 | 0.362722813  | 0.821865146 | 0.364635405 | 0.999071534 | Pcsk6         | Pcsk6         | PCSK6    | 2.386122114 | 1.778701332 | 1.750325729 | 0.069382107 | 1.569661478 | 1.600767553 | 1.617882337 | 0.483577167 | 0           | 0.653589645 |
| ENSMUSG000000037315 | 0.246997208  | 3.984955957  | 0.821812151 | 0.364650868 | 0.999071534 | Phf16         | Jade3         | JADE3    | 14.66762701 | 13.34025999 | 16.29149332 | 12.62754339 | 17.78949675 | 20.37340523 | 20.51474803 | 11.19135729 | 14.77090716 | 15.81686941 |
| ENSMUSG000000040950 | -0.436228925 | 2.25096938   | 0.821764376 | 0.364664808 | 0.999071534 | Mgl2          | Mgl2          |          | 7.298723488 | 6.521904885 | 8.213066882 | 2.636520049 | 3.073920395 | 8.222124252 | 2.588611739 | 3.315957715 | 1.335667137 | 4.64048648  |
| ENSMUSG000000002897 | -0.254753646 | 5.190122957  | 0.821502572 | 0.364741215 | 0.999071534 | Il17ra        | Il17ra        | IL17RA   | 58.24942784 | 48.14351606 | 32.04442488 | 31.08318373 | 37.01784986 | 59.81049677 | 38.44088433 | 31.6397632  | 13.90665195 | 24.1174579  |
| ENSMUSG000000005107 | -0.657995159 | 0.359936772  | 0.821347108 | 0.364786597 | 0.999071534 | Slc2a9        | Slc2a9        | SLC2A9   | 2.105401006 | 2.253021687 | 1.95228639  | 0.346910533 | 0.654025616 | 2.328389169 | 0.647152935 | 0.759906976 | 0.15713731  | 0.71894861  |
| ENSMUSG000000074115 | -0.629675457 | 0.520094344  | 0.821323797 | 0.364793403 | 0.999071534 | Saa1          | Saa1          |          | 2.105401006 | 2.490181865 | 2.221567271 | 0.555056852 | 0.850233301 | 0.436572969 | 0.453007054 | 1.72706131  | 0.392843275 | 1.830051006 |
| ENSMUSG000000031754 | 0.240918099  | 6.398499543  | 0.821237351 | 0.364818642 | 0.999071534 | Nudt21        | Nudt21        | NUDT21   | 77.8296572  | 57.98566343 | 93.03654451 | 102.9630461 | 66.31819746 | 74.21740475 | 73.12828163 | 73.5728118  | 108.0319008 | 98.95347226 |
| ENSMUSG000000022335 | 0.36003461   | 2.302020578  | 0.821179567 | 0.364835514 | 0.999071534 | Zfat          | Zfat          | ZFAT     | 3.930081878 | 5.217523908 | 3.837252559 | 2.636520049 | 6.344048475 | 5.820972922 | 4.335924663 | 4.490359406 | 5.028393926 | 6.274460592 |
| ENSMUSG000000008129 | -0.853994546 | -0.525579919 | 0.82111875  | 0.364853272 | 0.999071534 | 4930432K21Rik | 4930432K21Rik | C19orf57 | 1.333420637 | 0.830060622 | 1.009803305 | 0.20814632  | 0.39241537  | 0.727621615 | 0.582437641 | 0.069082452 | 0.549980586 | 0           |
| ENSMUSG000000039016 | 0.236815218  | 5.68816998   | 0.820897338 | 0.364917936 | 0.999071534 | Timm8b        | Timm8b        | TIMM8B   | 53.12628539 | 36.22621713 | 46.58559248 | 61.88883904 | 46.10880593 | 32.30639972 | 65.10358524 | 53.67706551 | 46.90548709 | 65.16288761 |
| ENSMUSG000000037580 | 0.374063264  | 2.591521361  | 0.820518604 | 0.365028582 | 0.999071534 | Gch1          | Gch1          | GCH1     | 7.860163757 | 7.589125684 | 4.443134543 | 2.428373729 | 4.578179312 | 5.893735083 | 7.312828163 | 4.421276953 | 7.385453579 | 6.53589645  |

|                     |              |              |             |             |             |              |          |          |             |             |             |             |             |             |             |             |             |             |
|---------------------|--------------|--------------|-------------|-------------|-------------|--------------|----------|----------|-------------|-------------|-------------|-------------|-------------|-------------|-------------|-------------|-------------|-------------|
| ENSMUSG00000051639  | -1.765005833 | 2.694462914  | 0.820506036 | 0.365032254 | 0.999071534 | Gm5812       | Gm5812   |          | 27.58075318 | 24.07175803 | 0           | 0           | 0           | 17.09910796 | 0           | 0           | 0           | 0           |
| ENSMUSG00000073838  | -0.351712871 | 5.669720698  | 0.820495696 | 0.365035276 | 0.999071534 | Tufm         | Tufm     | TUFM     | 91.58494377 | 68.06497098 | 41.33461529 | 38.0907765  | 58.79690287 | 107.1786639 | 66.07431464 | 16.23437631 | 16.49941757 | 26.53573959 |
| ENSMUSG00000022769  | 0.205803419  | 5.969259964  | 0.820461016 | 0.36504541  | 0.999071534 | Sdf2l1       | Sdf2l1   | SDF2L1   | 62.39004982 | 60.23868512 | 45.77774983 | 51.13461253 | 83.19205835 | 71.96177775 | 88.91881324 | 55.40412682 | 49.73395868 | 59.01914495 |
| ENSMUSG00000046491  | 0.940730354  | -0.602869125 | 0.819824337 | 0.365231531 | 0.999071534 | C1qtnf2      | C1qtnf2  | C1QTNF2  | 1.122880537 | 0.059290044 | 0           | 0.346910533 | 0.327012808 | 1.45524323  | 0.906014109 | 0.138164905 | 0.078568655 | 0.980384468 |
| ENSMUSG00000000184  | -0.322908319 | 4.658036965  | 0.819717881 | 0.365262664 | 0.999071534 | Ccnd2        | Ccnd2    | CCND2    | 23.15941107 | 19.0913943  | 31.775144   | 47.52674299 | 21.4520402  | 38.56394561 | 9.254286968 | 12.78025369 | 23.64916518 | 25.03248341 |
| ENSMUSG00000059713  | -0.250572214 | 4.313859576  | 0.818713157 | 0.365556677 | 0.999071534 | Rcan3        | Rcan3    | RCAN3    | 25.47535218 | 31.06798327 | 19.65750434 | 16.16603083 | 19.55536592 | 31.36049162 | 18.76743511 | 12.08942917 | 12.41384751 | 15.42471562 |
| ENSMUSG00000034820  | 0.205238644  | 5.765421072  | 0.818603363 | 0.365588826 | 0.999071534 | Cpsf7        | Cpsf7    | CPSF7    | 46.038102   | 54.54684085 | 59.51107478 | 49.40005986 | 52.06043903 | 60.82916703 | 35.98170317 | 72.05299785 | 46.98405575 | 63.79034936 |
| ENSMUSG00000062257  | 0.675734563  | 0.937299164  | 0.818491831 | 0.365621488 | 0.999071534 | Opcml        | Opcml    | OPCML    | 3.298461576 | 0.118580089 | 2.154247051 | 0.971349492 | 0.719428178 | 1.528005392 | 1.164875283 | 1.519813953 | 4.792687961 | 0.915025503 |
| ENSMUSG00000029299  | 0.405076635  | 2.604257429  | 0.818220056 | 0.365701094 | 0.999071534 | Abcg3        | Abcg3    | ABCG2    | 6.175842952 | 6.521904885 | 4.241173882 | 4.648601139 | 5.035997243 | 13.82481069 | 8.671849326 | 1.657978857 | 4.714119306 | 5.424794054 |
| ENSMUSG00000078763  | -0.382254738 | 2.855217449  | 0.81747611  | 0.365919127 | 0.999071534 | Slfm1        | Slfm1    | SLFM12L  | 14.66762701 | 7.174095373 | 11.10783636 | 4.162926393 | 4.90519212  | 10.4049891  | 4.724216424 | 5.388431287 | 3.064177549 | 7.320204025 |
| ENSMUSG00000043262  | -0.261905049 | 3.79017077   | 0.817152521 | 0.366014019 | 0.999071534 | Uevld        | Uevld    | UEVLD    | 13.96582667 | 17.43127306 | 14.74312825 | 10.6154623  | 21.25583252 | 14.40690798 | 14.17264927 | 10.98410993 | 7.464022234 | 13.9868184  |
| ENSMUSG00000006906  | -0.223129054 | 4.324309392  | 0.817104951 | 0.366027972 | 0.999071534 | Stampb       | Stampb   | STAMPB   | 16.42212785 | 25.79116932 | 23.22547602 | 22.2022741  | 23.47951961 | 18.11777822 | 19.28515746 | 19.41216912 | 14.06378926 | 17.64692042 |
| ENSMUSG00000087299  | -0.77295146  | -0.211906783 | 0.81665457  | 0.36616011  | 0.999071534 | Gm12953      | Gm12953  |          | 0.98252047  | 0.355740266 | 1.413724627 | 1.457024238 | 0.523220493 | 1.309718907 | 0.258861174 | 0           | 0.549980586 | 0.588230681 |
| ENSMUSG00000029403  | 0.279692395  | 3.365871907  | 0.815858604 | 0.366393802 | 0.999071534 | Cdkl2        | Cdkl2    | CDKL2    | 11.5095255  | 9.486407105 | 10.03071283 | 6.660682229 | 10.26820217 | 12.22404314 | 12.23119047 | 12.22759407 | 9.113963991 | 8.104511599 |
| ENSMUSG00000028017  | 0.748123007  | -0.255984815 | 0.815555751 | 0.366482773 | 0.999071534 | Egf          | Egf      | EGF      | 0.140360067 | 0.118580089 | 0.740522424 | 0.832585279 | 0.915635862 | 0.363810808 | 0.517722348 | 1.174401691 | 1.335667137 | 0.71894861  |
| ENSMUSG00000099137  | 0.751685944  | 0.067054069  | 0.814275137 | 0.366859316 | 0.999071534 | RP23-308M1.2 | Gm10603  |          | 0.421080201 | 0.652190488 | 0.471241542 | 1.80393477  | 0.130805123 | 0.727621615 | 0.323576467 | 0.483577167 | 1.414235792 | 2.483640651 |
| ENSMUSG00000038418  | -0.372854685 | 5.093905876  | 0.814218965 | 0.366875845 | 0.999071534 | Egr1         | Egr1     | EGR1     | 27.93165335 | 76.42486724 | 39.18036824 | 19.35760773 | 37.8026806  | 25.75780518 | 7.765835218 | 55.88770399 | 19.40645781 | 33.20235397 |
| ENSMUSG000000045930 | 0.433863767  | 2.621645873  | 0.814090215 | 0.366913734 | 0.999071534 | Clec14a      | Clec14a  | CLEC14A  | 4.491522147 | 8.122736084 | 5.116336746 | 4.371072713 | 4.51277675  | 12.58785394 | 12.03704459 | 1.72706131  | 5.028393926 | 3.33330719  |
| ENSMUSG00000057132  | -0.557206525 | 0.596500999  | 0.814010747 | 0.366937123 | 0.999071534 | Rpgrip1      | Rpgrip1  | RPGRIP1  | 1.754500839 | 0.711480533 | 2.760129034 | 2.081463196 | 1.177246109 | 0.9459081   | 0.776583522 | 0.690824524 | 1.571373102 | 1.241820326 |
| ENSMUSG00000030629  | 0.20070217   | 6.379935492  | 0.813497746 | 0.367088157 | 0.999071534 | Zfand6       | Zfand6   | ZFAND6   | 81.33865887 | 72.57101435 | 75.06204568 | 79.85880464 | 92.93704003 | 71.01586965 | 86.91263914 | 94.29754752 | 85.08985347 | 83.92091042 |
| ENSMUSG00000024164  | -0.300621583 | 7.28019374   | 0.813424465 | 0.367109739 | 0.999071534 | C3           | C3       | C3       | 161.203537  | 288.2681959 | 136.5254069 | 145.7024238 | 160.6940938 | 94.88185863 | 67.75691227 | 207.7309343 | 120.6814542 | 165.5542571 |
| ENSMUSG00000060336  | 0.376841886  | 1.953764875  | 0.813351043 | 0.367131365 | 0.999071534 | Zfp937       | Zfp937   | ZNF788   | 2.737021308 | 4.743203553 | 2.490848153 | 3.260959008 | 3.662543449 | 4.729540499 | 4.659501131 | 4.559441858 | 2.514196963 | 4.182973728 |
| ENSMUSG00000040713  | -0.267314267 | 4.805495952  | 0.813287179 | 0.367150177 | 0.999071534 | Creg1        | Creg1    | CREG1    | 43.23090066 | 38.716399   | 14.94508892 | 33.09526482 | 27.99229636 | 28.01343219 | 34.81682789 | 27.14940379 | 16.9708295  | 16.0129463  |
| ENSMUSG00000024052  | 0.270357727  | 5.734613737  | 0.81323377  | 0.367165909 | 0.999071534 | Lpin2        | Lpin2    | LPIN2    | 47.58206274 | 70.91089311 | 42.88298036 | 31.49947637 | 58.73150031 | 41.76548071 | 31.96935498 | 94.57387733 | 47.53403633 | 59.08450391 |
| ENSMUSG00000025512  | -0.231941611 | 5.054796713  | 0.813224171 | 0.367168737 | 0.999071534 | Chid1        | Chid1    | CHID1    | 52.49466509 | 38.53852886 | 28.27449254 | 32.95650061 | 33.94392947 | 37.2542267  | 46.27143484 | 21.6228076  | 20.89926226 | 23.13707343 |
| ENSMUSG00000038406  | -0.240599392 | 5.663896503  | 0.813066976 | 0.367215049 | 0.999071534 | Scaf1        | Scaf1    | SCAF1    | 56.2843869  | 57.03702272 | 56.01042332 | 47.52674299 | 68.34567687 | 68.03262102 | 22.13263037 | 57.26935303 | 24.6705577  | 57.71196566 |
| ENSMUSG00000052593  | -0.181193848 | 6.137069071  | 0.813044874 | 0.367221561 | 0.999071534 | Adam17       | Adam17   | ADAM17   | 76.91731676 | 85.67411417 | 74.1195626  | 74.03070769 | 76.91341244 | 79.82009119 | 74.29315691 | 61.13797037 | 49.41968406 | 56.07799155 |
| ENSMUSG00000024993  | 0.23315178   | 4.463358063  | 0.813025477 | 0.367227277 | 0.999071534 | Fam45a       | Fam45a   | FAM45A   | 20.70310989 | 24.13104807 | 19.859465   | 16.9986161  | 23.28331193 | 26.99476192 | 31.51634792 | 26.04408455 | 16.1065743  | 14.77112598 |
| ENSMUSG00000020777  | -0.208688655 | 5.940760244  | 0.812379773 | 0.367417604 | 0.999071534 | Ac ox1       | Ac ox1   | ACOX1    | 63.51293036 | 78.61859888 | 54.19277738 | 57.65653054 | 88.42426328 | 74.72673988 | 44.39469133 | 73.50372935 | 36.37728731 | 49.80353095 |
| ENSMUSG00000022510  | -0.4302074   | 1.620017133  | 0.812162385 | 0.367481712 | 0.999071534 | Trp63        | Trp63    | TP63     | 4.491522147 | 4.861783641 | 2.625488593 | 2.705902155 | 2.87771271  | 2.110102684 | 2.200319978 | 3.385040167 | 1.099961171 | 3.33330719  |
| ENSMUSG00000038368  | 0.30776871   | 3.586650436  | 0.811900344 | 0.367559009 | 0.999071534 | Focad        | Focad    | FOCAD    | 11.9306057  | 13.45884008 | 11.98299922 | 4.787365352 | 13.47292769 | 23.28389169 | 12.55476693 | 8.013564478 | 9.899650542 | 11.76461361 |
| ENSMUSG00000004319  | 0.235106129  | 5.019114634  | 0.811754286 | 0.367602103 | 0.999071534 | Clc n3       | Clc n3   | CLCN3    | 29.26507399 | 39.7836198  | 21.94639183 | 27.05902155 | 36.42922681 | 33.39783214 | 53.13125595 | 36.06104015 | 20.58498764 | 26.66645752 |
| ENSMUSG00000019082  | -0.241636389 | 4.215726684  | 0.811650464 | 0.36763274  | 0.999071534 | Slc25a22     | Slc25a22 | SLC25A22 | 22.52779077 | 22.11518656 | 19.5228639  | 15.8885024  | 24.19894779 | 27.43133489 | 16.43768454 | 13.67832557 | 8.642552061 | 18.43122799 |
| ENSMUSG00000029790  | 0.340329603  | 2.554186552  | 0.811283138 | 0.367741162 | 0.999071534 | Cep41        | Cep41    | CEP41    | 6.175842952 | 4.624623464 | 6.462741153 | 3.538487434 | 5.624620297 | 7.203453991 | 5.759666112 | 4.144947144 | 5.342668547 | 8.627383315 |
| ENSMUSG00000000555  | -0.269582944 | 8.176895222  | 0.811123623 | 0.36778826  | 0.999071534 | Itga5        | Itga5    | ITGA5    | 261.1399048 | 506.9891697 | 395.2370136 | 241.588495  | 239.5041806 | 393.2067209 | 197.5110757 | 305.8280167 | 169.6297264 | 229.8021192 |
| ENSMUSG00000078370  | -0.734420234 | 0.448524698  | 0.811043896 | 0.367811802 | 0.999071534 | Gm6316       | Gm6316   |          | 1.263240604 | 1.778701332 | 0.538561763 | 1.665170557 | 2.746907587 | 0.582097292 | 0           | 2.486968286 | 0.785686551 | 0.457512752 |
| ENSMUSG00000031214  | 0.248619443  | 3.94868742   | 0.810977088 | 0.367831532 | 0.999071534 | Ophn1        | Ophn1    | OPHN1    | 12.70258607 | 14.58535092 | 13.86796539 | 14.98653501 | 16.41604296 | 18.40882687 | 10.8721693  | 15.40538688 | 15.94943698 | 19.1501766  |
| ENSMUSG00000057561  | 0.230801625  | 6.561704841  | 0.810898873 | 0.367854632 | 0.999071534 | Eif1a        | Eif1a    | EIF1AY   | 105.9718506 | 93.55969007 | 82.0633486  | 71.60233396 | 99.2810885  | 127.9886421 | 165.153429  | 68.66795768 | 60.57643308 | 80.06473152 |
| ENSMUSG00000095595  | 0.254561095  | 5.15420092   | 0.810861502 | 0.36786567  | 0.999071534 | Fam177a      | Fam177a  | FAM177A1 | 24.77355184 | 31.42372354 | 48.40323843 | 30.45874478 | 32.63587824 | 27.72238354 | 26.33912445 | 42.48570822 | 46.66978113 | 36.53566116 |

|                     |              |              |             |             |             |                |                |                 |             |             |             |             |             |             |             |             |             |             |
|---------------------|--------------|--------------|-------------|-------------|-------------|----------------|----------------|-----------------|-------------|-------------|-------------|-------------|-------------|-------------|-------------|-------------|-------------|-------------|
| ENSMUSG00000098923  | 0.226828488  | 4.217887804  | 0.810775254 | 0.367891146 | 0.999071534 | TMEM185B       | Tmem185b       | TMEM185B        | 16.63266795 | 18.0241735  | 17.50325729 | 14.22333184 | 22.3022735  | 18.69987551 | 21.74433861 | 21.00106553 | 14.45663254 | 20.19592003 |
| ENSMUSG00000008036  | -0.233307411 | 7.329210366  | 0.810349182 | 0.368017035 | 0.999071534 | Ap2s1          | Ap2s1          | AP2S1           | 188.4333901 | 115.8527468 | 205.7979136 | 216.4027903 | 170.8314909 | 170.4817444 | 141.2087704 | 116.05852   | 111.9603335 | 178.560691  |
| ENSMUSG000000041482 | 0.270090027  | 3.910883172  | 0.809814895 | 0.368174983 | 0.999071534 | Piezo2         | Piezo2         | PIEZO2          | 11.57970553 | 14.22961066 | 14.60848781 | 16.72108768 | 12.68809695 | 22.26522143 | 10.54859284 | 12.15851162 | 18.85647722 | 14.50969012 |
| ENSMUSG000000030774 | -0.190213026 | 6.277347126  | 0.809755389 | 0.36819258  | 0.999071534 | Pak1           | Pak1           | PAK1            | 88.7075624  | 102.0974565 | 71.8306751  | 74.51638243 | 92.41381954 | 105.9417072 | 64.78000877 | 62.17420715 | 50.28393926 | 73.659553   |
| ENSMUSG000000087260 | 0.211480428  | 6.338175225  | 0.808819633 | 0.368469457 | 0.999071534 | Lamtor5        | Lamtor5        | LAMTORS         | 81.68955904 | 67.11633027 | 69.94570894 | 83.81358471 | 85.67735569 | 69.48786425 | 121.8588976 | 84.34967437 | 65.84053297 | 73.98634782 |
| ENSMUSG000000084910 | 0.537628781  | 0.581379754  | 0.808767642 | 0.368484849 | 0.999071534 | C630043F03Rik  | C630043F03Rik  |                 | 0.491260235 | 0.948640711 | 2.154247051 | 1.179495811 | 0.981038424 | 1.746291877 | 1.100159989 | 1.312566595 | 1.649941757 | 1.960768935 |
| ENSMUSG000000031570 | 0.244305286  | 4.866192389  | 0.808671001 | 0.368513461 | 0.999071534 | Ppapdc1b       | Plpp5          | PLPP5           | 17.47482835 | 25.25755892 | 36.89148075 | 29.20986686 | 28.64632198 | 25.03018356 | 24.52709623 | 41.51855389 | 27.8133039  | 30.52263642 |
| ENSMUSG000000012123 | 0.540548069  | 1.247828769  | 0.808475256 | 0.368571426 | 0.999071534 | Aim1l          | Aim1l          | AIM1L           | 2.596661241 | 2.193731643 | 2.827449254 | 0.901967385 | 1.046440986 | 0.727621615 | 1.294305087 | 2.832380548 | 3.378452169 | 3.986896835 |
| ENSMUSG000000082465 | -0.814304454 | 0.46456364   | 0.807567677 | 0.368840346 | 0.999071534 | Rps6-ps3       | Rps6-ps3       |                 | 2.17558104  | 2.01586151  | 1.413724627 | 0.277528426 | 2.419894779 | 1.164194584 | 1.229590576 | 2.072473572 | 0           | 0           |
| ENSMUSG000000062743 | 0.572071036  | 0.502390821  | 0.80754208  | 0.368847935 | 0.999071534 | Zfp677         | Zfp677         |                 | 1.543960738 | 1.778701332 | 0.269280881 | 1.040731598 | 0.719428178 | 2.328389169 | 1.359021163 | 0.828989429 | 0.942823861 | 2.156845829 |
| ENSMUSG000000022094 | -0.221624848 | 6.748219736  | 0.807248245 | 0.36893506  | 0.999071534 | Slc39a14       | Slc39a14       | SLC39A14        | 124.0081193 | 172.8897695 | 112.1554871 | 100.950965  | 91.1057683  | 139.3395393 | 120.3057306 | 74.47088368 | 61.12641367 | 95.35872921 |
| ENSMUSG000000069892 | 0.299933433  | 3.765664082  | 0.807157261 | 0.368962044 | 0.999071534 | 9930111J21Rik2 | 9930111J21Rik2 |                 | 11.9306057  | 10.85007813 | 17.77253817 | 9.297202278 | 12.9497072  | 15.57110257 | 7.765835218 | 12.78025369 | 19.56359512 | 14.24825426 |
| ENSMUSG000000028100 | 0.582552899  | 0.41233992   | 0.806484482 | 0.36916166  | 0.999071534 | Nudt17         | Nudt17         | NUDT17          | 1.403600671 | 0.355740266 | 1.481044848 | 0.971349492 | 0.784830739 | 1.746291877 | 0.647152935 | 2.486968286 | 1.178529826 | 0.915025503 |
| ENSMUSG000000097960 | -0.701863201 | 0.362658974  | 0.806441045 | 0.369174553 | 0.999071534 | A330074K22Rik  | A330074K22Rik  |                 | 1.263240604 | 2.490181865 | 1.817645949 | 0.763203172 | 1.046440986 | 1.309718907 | 1.035444696 | 1.865226215 | 0.078568655 | 0.065358965 |
| ENSMUSG000000063816 | 0.525087169  | 1.293311765  | 0.806435236 | 0.369176277 | 0.999071534 | Gm4987         | Gm4987         |                 | 3.438821644 | 2.01586151  | 1.346404407 | 2.01208109  | 1.111843547 | 1.091432423 | 3.559341141 | 1.381649048 | 4.556981996 | 1.895409971 |
| ENSMUSG000000055652 | -0.313988727 | 3.135611411  | 0.805942706 | 0.369322516 | 0.999071534 | Klh25          | Klh25          | KLHL25          | 13.12366627 | 12.62877946 | 7.539864678 | 8.117706466 | 8.567735569 | 12.87890259 | 8.412988152 | 7.046410144 | 4.00700141  | 6.274460592 |
| ENSMUSG000000032712 | 0.210942857  | 6.277137378  | 0.805623507 | 0.369417334 | 0.999071534 | 2810474O19Rik  | 2810474O19Rik  | KIAA1551        | 66.24995166 | 98.24360358 | 61.93460271 | 69.24334234 | 77.24042524 | 80.47495064 | 62.57968879 | 92.01782659 | 86.81836388 | 72.15629681 |
| ENSMUSG000000054484 | 0.406821372  | 1.82032982   | 0.805360809 | 0.369495393 | 0.999071534 | Tmem62         | Tmem62         | TMEM62          | 2.737021308 | 1.956571465 | 3.433331237 | 2.636520049 | 4.447374189 | 3.492583753 | 5.436084652 | 4.006782239 | 1.885647722 | 4.052255799 |
| ENSMUSG000000083610 | -0.775305942 | 1.144639123  | 0.804895615 | 0.36963368  | 0.999071534 | Oaz2-ps        | Oaz2-ps        |                 | 3.438821644 | 5.751134307 | 1.548365068 | 0.277528426 | 2.681505025 | 4.147443207 | 2.9769035   | 0.828989429 | 0           | 0.130717929 |
| ENSMUSG000000087095 | 0.588364561  | 0.469997482  | 0.80445944  | 0.369763406 | 0.999071534 | Emx2os         | Emx2os         |                 | 0.912340436 | 0.889350666 | 1.750325729 | 0.832585279 | 0.850233301 | 0.509335131 | 0.776583522 | 1.72706131  | 2.435628308 | 1.437897219 |
| ENSMUSG000000004070 | -0.186654362 | 6.070084995  | 0.804341705 | 0.369798433 | 0.999071534 | Hmxo2          | Hmxo2          | HMOX2           | 85.54946089 | 66.99775018 | 70.1476696  | 71.25542343 | 76.978815   | 78.14656147 | 72.86942046 | 61.89787734 | 39.59860217 | 55.16296604 |
| ENSMUSG000000028838 | 1.026658783  | -0.483006061 | 0.804248832 | 0.369826067 | 0.999071534 | Extl1          | Extl1          | EXTL1           | 0.561440268 | 0.118580089 | 0.06732022  | 0.693821065 | 0.588623054 | 0.072762162 | 0.064715293 | 0           | 1.492804447 | 1.960768935 |
| ENSMUSG000000042826 | -0.712517871 | 0.743768467  | 0.804129927 | 0.369861451 | 0.999071534 | Fgf11          | Fgf11          | FGF11           | 1.19306057  | 3.616692709 | 1.009803305 | 1.179495811 | 2.943115272 | 1.164194584 | 0.129430587 | 3.523205072 | 0.078568655 | 0.784307574 |
| ENSMUSG000000070271 | -0.610697504 | 0.428365434  | 0.803836944 | 0.369948657 | 0.999071534 | Gm13268        | Gm13268        |                 | 0.701800335 | 1.126510844 | 2.356207712 | 2.22022741  | 1.111843547 | 0.363810808 | 2.006174098 | 0.483577167 | 0.864255206 | 0.784307574 |
| ENSMUSG000000034438 | -0.455236347 | 2.26186988   | 0.803730274 | 0.369980414 | 0.999071534 | Gbp8           | Gbp8           | GBP6            | 9.333944461 | 6.581194929 | 5.183656966 | 2.01208109  | 5.166802366 | 5.893735083 | 1.68259763  | 4.006782239 | 1.178529826 | 6.928050238 |
| ENSMUSG000000039219 | 0.27839979   | 6.151188283  | 0.803436393 | 0.370067927 | 0.999071534 | Arid4b         | Arid4b         | ARID4B          | 46.17846207 | 57.21489285 | 87.17968534 | 71.53295185 | 69.52292298 | 53.6984752  | 38.24673845 | 95.74827902 | 99.07507408 | 73.00596335 |
| ENSMUSG000000036282 | 0.199213386  | 4.84519563   | 0.803148034 | 0.370153823 | 0.999071534 | Naa30          | Naa30          | NAA30           | 24.14193154 | 29.17070185 | 28.81305431 | 28.30789947 | 27.66528356 | 31.06944297 | 37.47015492 | 27.90931077 | 22.86347863 | 28.62722645 |
| ENSMUSG000000018752 | -0.327043059 | 3.800001916  | 0.803142001 | 0.37015562  | 0.999071534 | BC096441       | Tnfsfm13       | TNFSF12-TNFSF13 | 12.70258607 | 16.71979252 | 8.415027543 | 29.20986686 | 11.51085084 | 14.33414582 | 16.30825396 | 10.29328541 | 10.68533709 | 7.581639883 |
| ENSMUSG000000021798 | 0.734350174  | -0.110505385 | 0.803000125 | 0.370197893 | 0.999071534 | Ldb3           | Ldb3           | LD83            | 1.263240604 | 0.237160178 | 0.403921322 | 1.110113705 | 0.065402562 | 0.727621615 | 0.453007054 | 1.381649048 | 0.707117896 | 1.503256184 |
| ENSMUSG000000031506 | 0.271969047  | 4.167463652  | 0.802802601 | 0.370256757 | 0.999071534 | Ptpn7          | Ptpn7          | PTPN7           | 18.31698875 | 13.2216799  | 19.05162236 | 19.01069719 | 13.99614818 | 25.24847005 | 18.05556688 | 8.497141644 | 20.89926226 | 21.43774036 |
| ENSMUSG000000044199 | -0.567920417 | 0.510202457  | 0.802764093 | 0.370268234 | 0.999071534 | S1pr4          | S1pr4          | S1PR4           | 1.543960738 | 2.371601776 | 0.605881983 | 2.428373729 | 0.981038424 | 1.45524323  | 0.517722348 | 0.759906976 | 1.335667137 | 0.915025503 |
| ENSMUSG000000027804 | 0.223612169  | 6.97182905   | 0.802630373 | 0.370308093 | 0.999071534 | Ppid           | Ppid           | PPID            | 115.3057951 | 85.02192368 | 149.9894509 | 124.1245886 | 124.9842952 | 187.6536146 | 146.1271327 | 84.90233399 | 117.774414  | 123.397725  |
| ENSMUSG000000096370 | 0.257391742  | 3.73032701   | 0.801515443 | 0.370640663 | 0.999071534 | Gm21992        | Gm21992        | RBM4            | 12.562226   | 10.5536279  | 11.78103856 | 15.40282765 | 11.5762534  | 14.5524323  | 12.23119047 | 12.22759407 | 11.39245499 | 18.62730488 |
| ENSMUSG000000071648 | -0.428118415 | 1.737783195  | 0.80150017  | 0.370645221 | 0.999071534 | Rom1           | Rom1           | ROM1            | 3.579181711 | 5.691844263 | 2.827449254 | 3.191576901 | 3.793348573 | 4.729540499 | 3.818202315 | 1.657978857 | 2.042785033 | 1.30717929  |
| ENSMUSG000000097353 | 0.470765915  | 1.638340239  | 0.801049838 | 0.370779671 | 0.999071534 | A430046D13Rik  | A430046D13Rik  |                 | 3.509001677 | 1.304380977 | 2.625488593 | 3.122194795 | 2.419894779 | 2.255627007 | 2.9769035   | 1.519813953 | 5.499805857 | 3.725460977 |
| ENSMUSG000000037166 | -0.788587767 | -0.202352122 | 0.80104965  | 0.370779727 | 0.999071534 | Ppp1r14a       | Ppp1r14a       | PPP1R14A        | 1.473780704 | 0.889350666 | 1.615685288 | 0.20814632  | 0.654025616 | 0.509335131 | 0.906014109 | 0           | 0.15713731  | 1.045743432 |
| ENSMUSG000000071064 | 0.30326315   | 4.373684255  | 0.801038152 | 0.37078316  | 0.999071534 | Zfp827         | Zfp827         | ZNF827          | 16.63266795 | 14.52606088 | 24.43723998 | 18.10872981 | 21.9752607  | 21.173789   | 7.959981098 | 20.44840591 | 29.69895163 | 27.18932923 |
| ENSMUSG000000042389 | 0.351267915  | 2.948910101  | 0.800588173 | 0.370917574 | 0.999071534 | Tsen2          | Tsen2          | TSEN2           | 11.86042567 | 6.699775018 | 5.722218729 | 4.093544286 | 6.54025616  | 11.49642152 | 13.20191987 | 5.733843549 | 5.735511822 | 5.751588876 |
| ENSMUSG000000014164 | -1.035964088 | -0.792517377 | 0.800564878 | 0.370924534 | 0.999071534 | Klh3           | Klh3           | KLHL3           | 0.631620302 | 0.948640711 | 1.211763966 | 0           | 0.261610246 | 1.309718907 | 0.064715293 | 0.069082452 | 0           | 0.130717929 |

|                    |              |              |             |             |             |               |               |                |             |             |             |             |             |             |             |             |             |             |
|--------------------|--------------|--------------|-------------|-------------|-------------|---------------|---------------|----------------|-------------|-------------|-------------|-------------|-------------|-------------|-------------|-------------|-------------|-------------|
| ENSMUSG00000017286 | 0.199157727  | 5.165101154  | 0.800517716 | 0.370938626 | 0.999071534 | Glod4         | Glod4         | GLOD4          | 43.7221609  | 37.05627775 | 25.11044219 | 31.15256584 | 36.23301912 | 45.33082663 | 43.42396192 | 30.39627905 | 32.05601128 | 34.11737947 |
| ENSMUSG00000028580 | 0.231500828  | 5.789412514  | 0.799877024 | 0.37113014  | 0.999071534 | Pum1          | Pum1          | PUM1           | 39.37099882 | 49.03286672 | 58.9051928  | 53.0079294  | 62.85186169 | 62.2116481  | 30.99862558 | 67.21722618 | 66.62621952 | 55.22832501 |
| ENSMUSG00000052605 | -0.512729838 | 1.130392714  | 0.799572896 | 0.371221097 | 0.999071534 | Isoc2b        | Isoc2b        | ISOC2          | 4.210802013 | 2.608761954 | 0.875162864 | 2.289609516 | 2.616102464 | 0.654859454 | 1.229590576 | 2.348803381 | 1.571373102 | 2.091486864 |
| ENSMUSG00000020516 | 0.187793064  | 5.575913847  | 0.799416113 | 0.371268    | 0.999071534 | Rps6kb1       | Rps6kb1       | RPS6KB1        | 38.80955855 | 44.94185366 | 57.02022663 | 42.32308499 | 47.6784674  | 58.35525354 | 41.35307253 | 47.39056234 | 47.7697423  | 48.82314649 |
| ENSMUSG00000092218 | 0.558231124  | 0.983912102  | 0.79928946  | 0.371305894 | 0.999071534 | Gm20529       | Gm20529       |                | 1.19306057  | 2.01586151  | 0.336601102 | 2.358991623 | 1.765869163 | 3.056010784 | 1.553167044 | 2.003391119 | 0.471411931 | 3.92153787  |
| ENSMUSG00000042604 | -0.740283799 | 0.178467226  | 0.799201058 | 0.371332347 | 0.999071534 | Kcna4         | Kcna4         | KCNA4          | 0.701800335 | 1.245090933 | 0.336601102 | 3.122194795 | 0.981038424 | 0.072762162 | 0.388291761 | 0.828989429 | 1.335667137 | 0.71894861  |
| ENSMUSG00000055210 | -0.558199112 | 0.941842099  | 0.798954278 | 0.371406207 | 0.999071534 | Foxd2         | Foxd2         | FOXD2          | 1.122880537 | 2.075151554 | 3.298690797 | 1.734552664 | 2.812310149 | 1.528005392 | 0.388291761 | 3.246875263 | 1.099961171 | 0.653589645 |
| ENSMUSG00000022515 | 0.223880559  | 4.679835667  | 0.798283468 | 0.37160708  | 0.999071534 | Anks3         | Anks3         | ANKS3          | 26.73859278 | 23.71601776 | 25.37972307 | 20.05142879 | 26.55344001 | 24.9574214  | 18.31442805 | 27.01123889 | 24.51342039 | 36.40494323 |
| ENSMUSG00000022742 | 0.265711138  | 3.534304378  | 0.798043431 | 0.371678996 | 0.999071534 | Cpox          | Cpox          | CPOX           | 10.17610486 | 11.91729893 | 11.71371834 | 7.770795933 | 12.62269439 | 15.4983404  | 12.61948223 | 11.4676871  | 11.39245499 | 9.542408818 |
| ENSMUSG00000054469 | 0.232447922  | 4.673736987  | 0.79786981  | 0.371731025 | 0.999071534 | Lclat1        | Lclat1        | LCLAT1         | 21.5452703  | 30.77153305 | 24.5045602  | 18.52502245 | 26.29182976 | 49.40550767 | 28.99245148 | 22.72812684 | 16.26371161 | 20.39199693 |
| ENSMUSG00000028741 | 0.297736362  | 5.799819495  | 0.79780911  | 0.371749218 | 0.999071534 | Mrto4         | Mrto4         | MRTO4          | 80.56667851 | 48.38067624 | 48.20127776 | 35.31549223 | 48.00548021 | 84.18582088 | 118.2348412 | 24.31702324 | 37.7915231  | 39.54217353 |
| ENSMUSG00000002233 | -0.218521479 | 7.663446118  | 0.797672004 | 0.371790315 | 0.999071534 | Rhoc          | Rhoc          | RP11-426L16.10 | 246.823178  | 246.1129743 | 218.0501937 | 192.1884351 | 230.8710424 | 208.9001657 | 221.1968731 | 194.8125158 | 115.8887663 | 173.8548456 |
| ENSMUSG00000097028 | 0.428052615  | 1.677102073  | 0.797646919 | 0.371797835 | 0.999071534 | 7530420F21Rik | Ptgs2os       |                | 4.56170218  | 2.490181865 | 3.366011017 | 1.665170557 | 1.569661478 | 3.201535107 | 2.912188207 | 2.625133191 | 3.69272679  | 4.313691657 |
| ENSMUSG00000027339 | -0.245791024 | 4.597906184  | 0.79711711  | 0.371956706 | 0.999071534 | Rassf2        | Rassf2        | RASSF2         | 32.14245536 | 28.63709145 | 18.51306059 | 29.14048475 | 27.20746562 | 41.76548071 | 16.95540689 | 21.27739534 | 14.29949523 | 16.27438216 |
| ENSMUSG00000055494 | 0.845969559  | -0.43717156  | 0.79697046  | 0.372000699 | 0.999071534 | Gm14168       | Gm14168       |                | 0           | 0.474320355 | 0.336601102 | 0.624438959 | 0.784830739 | 0.218286485 | 0.388291761 | 1.657978857 | 0.15713731  | 1.30717929  |
| ENSMUSG00000044770 | 0.60618503   | 0.712155429  | 0.796696292 | 0.372001049 | 0.999071534 | Scml4         | Scml4         | SCML4          | 0.771980369 | 0.237160178 | 2.01960661  | 1.318260024 | 1.896674286 | 1.091432423 | 1.29430587  | 0.898071881 | 3.299883514 | 1.764692042 |
| ENSMUSG00000073902 | -0.625401051 | 1.543293997  | 0.796673835 | 0.372089703 | 0.999071534 | Gm1966        | Gm1966        |                | 6.175842952 | 7.233385418 | 0.875162864 | 1.040731598 | 2.354492217 | 6.403070214 | 1.941458804 | 1.796143762 | 1.021392516 | 0.261435858 |
| ENSMUSG00000037661 | 0.459468497  | 1.116242549  | 0.796504391 | 0.372140558 | 0.999071534 | Gpr160        | Gpr160        | GPRI60         | 3.228281543 | 1.48225111  | 1.346404407 | 0.971349492 | 1.962076848 | 2.837724299 | 1.617882337 | 2.003391119 | 2.199922343 | 2.745076509 |
| ENSMUSG00000010911 | 0.260405468  | 4.36251989   | 0.795847611 | 0.372337773 | 0.999071534 | Apip          | Apip          | APIP           | 25.12445201 | 11.85800888 | 18.17645949 | 21.57783514 | 19.68617104 | 15.93491337 | 31.45163263 | 18.30684988 | 19.87786974 | 20.261279   |
| ENSMUSG00000030505 | 0.20366503   | 5.426240656  | 0.795818759 | 0.372346439 | 0.999071534 | Prrmt3        | Prrmt3        | PRMT3          | 48.98566341 | 43.04457224 | 32.51566643 | 37.60510175 | 45.25857262 | 69.70615074 | 55.65515239 | 33.64315432 | 31.50603069 | 36.73173805 |
| ENSMUSG00000020952 | -0.18572507  | 5.583296663  | 0.795760295 | 0.372364002 | 0.999071534 | Scfd1         | Scfd1         | SCFD1          | 53.82808573 | 48.14351606 | 50.42284504 | 61.88883904 | 48.98651864 | 51.806659   | 54.49027711 | 39.92965748 | 31.82030531 | 39.93432731 |
| ENSMUSG00000037216 | 0.372420175  | 1.954496124  | 0.795337816 | 0.372490952 | 0.999071534 | Lipt1         | Lipt1         | LIPT1          | 4.000261912 | 2.727342043 | 4.173853661 | 2.081463196 | 4.054958819 | 5.602686437 | 4.206490476 | 3.937699786 | 2.592765618 | 4.444409586 |
| ENSMUSG00000029432 | 0.196370739  | 5.244080829  | 0.795097763 | 0.372563111 | 0.999071534 | Gbas          | Gbas          | GBAS           | 42.80982046 | 34.86254611 | 33.05422819 | 34.89919959 | 37.34486267 | 43.8755834  | 53.584263   | 34.05764903 | 25.45624425 | 39.93432731 |
| ENSMUSG00000018559 | -0.193526213 | 6.434378216  | 0.794633509 | 0.372702721 | 0.999071534 | Ctdnep1       | Ctdnep1       | CTDNEP1        | 83.72478002 | 104.0540279 | 100.7783699 | 89.29477113 | 100.5237372 | 102.1580748 | 56.10815945 | 85.31682871 | 67.80474935 | 79.47650084 |
| ENSMUSG00000049643 | -0.214060069 | 4.423809693  | 0.79440923  | 0.372770192 | 0.999071534 | 2310022A10Rik | 2310022A10Rik | C19orf47       | 24.56301174 | 24.30891821 | 27.19736902 | 18.17811192 | 25.04918109 | 29.75972406 | 18.50857394 | 16.16529386 | 15.63516236 | 17.05868974 |
| ENSMUSG00000097231 | 0.602020312  | 0.077877287  | 0.794120255 | 0.372857152 | 0.999071534 | Gm26852       | Gm26852       |                | 0.771980369 | 1.067220799 | 0.538561763 | 0.832585279 | 0.588623054 | 1.819054038 | 0.323576467 | 1.243484143 | 1.099961171 | 0.980384468 |
| ENSMUSG00000095567 | 0.213637672  | 6.28312737   | 0.794118944 | 0.372857546 | 0.999071534 | Noc2l         | Noc2l         | NOC2L          | 71.09237398 | 56.85915259 | 98.42216214 | 63.27648117 | 84.56551214 | 99.97520993 | 54.6197077  | 70.53318389 | 77.62583124 | 99.93385673 |
| ENSMUSG00000075312 | -0.439778904 | 2.855090251  | 0.793953259 | 0.372907417 | 0.999071534 | Gm13597       | Gm13597       |                | 13.12366627 | 13.16238986 | 4.375814322 | 4.440454819 | 7.717502268 | 10.25946477 | 11.19574577 | 4.490359406 | 1.492804447 | 3.202589261 |
| ENSMUSG00000031425 | 0.574117738  | 2.331813842  | 0.793563293 | 0.373024834 | 0.999071534 | Plp1          | Plp1          | PLP1           | 2.807201342 | 2.01586151  | 6.866662475 | 5.273040098 | 3.400933203 | 0.9459081   | 0.841298815 | 5.526596192 | 10.92104306 | 7.712357812 |
| ENSMUSG00000041431 | 0.29531086   | 6.070634792  | 0.793514517 | 0.373039524 | 0.999071534 | Ccnb1         | Ccnb1         | CCNB1          | 79.86487817 | 38.06420851 | 60.04963654 | 55.0893926  | 80.70676101 | 126.0968259 | 129.1070105 | 37.51177165 | 38.97005293 | 40.91471178 |
| ENSMUSG00000029276 | 0.238460511  | 4.592451408  | 0.793301148 | 0.373103794 | 0.999071534 | Glmn          | Glmn          | GLMN           | 26.45787265 | 16.89766266 | 17.16665619 | 32.05453323 | 20.99422227 | 25.75780518 | 27.56871502 | 21.55372515 | 24.6705577  | 24.70568858 |
| ENSMUSG00000032258 | 0.345165926  | 2.703364374  | 0.792787696 | 0.373258516 | 0.999071534 | Lca5          | Lca5          | LCA5           | 6.456563086 | 7.826285862 | 6.732022034 | 2.567137942 | 5.820827982 | 10.04117829 | 6.277383467 | 8.289894287 | 3.8498641   | 6.862691273 |
| ENSMUSG00000074088 | 0.23803684   | 5.24669914   | 0.792502453 | 0.37334451  | 0.999071534 | Snmp40        | Snmp40        | SNRNP40        | 42.10802013 | 27.80703083 | 45.30650829 | 29.14048475 | 36.29842169 | 63.66689133 | 51.96638066 | 21.41556024 | 35.27732614 | 29.2808161  |
| ENSMUSG00000039396 | 0.318992426  | 3.170355646  | 0.792249035 | 0.373420932 | 0.999071534 | Nei3          | Nei3          | NEI13          | 4.912602348 | 5.039653775 | 11.37711724 | 9.64411281  | 9.810384239 | 13.16995124 | 8.477703446 | 8.635306549 | 7.228316269 | 10.71887018 |
| ENSMUSG00000085457 | -0.263449189 | 4.675157049  | 0.791673967 | 0.373594434 | 0.999071534 | 1110046J04Rik | 1110046J04Rik |                | 31.01957483 | 24.19033812 | 26.05292527 | 39.27027231 | 22.43307863 | 13.2427134  | 25.62725622 | 26.32041436 | 14.77090716 | 30.26120057 |
| ENSMUSG00000032440 | -0.213475091 | 7.344180031  | 0.791588065 | 0.373620361 | 0.999071534 | Tgfb2         | Tgfb2         | TGFB2          | 176.7133245 | 175.2613713 | 179.1391063 | 180.4628591 | 193.2645695 | 225.0533656 | 151.8867938 | 151.9123128 | 94.36095477 | 121.4369561 |
| ENSMUSG00000074247 | -0.181926904 | 6.08970622   | 0.791584283 | 0.373621503 | 0.999071534 | Dda1          | Dda1          | DDA1           | 84.63712045 | 69.428642   | 71.09015268 | 75.00205718 | 74.88593303 | 80.76599929 | 65.29773112 | 50.84468496 | 55.54803915 | 56.79694015 |
| ENSMUSG00000020075 | 0.229899958  | 7.06161098   | 0.790929942 | 0.37381908  | 0.999071534 | Ddx21         | Ddx21         | DDX21          | 121.2009179 | 117.5721581 | 133.8999183 | 111.7051915 | 154.6116556 | 254.522041  | 129.8188787 | 85.45499361 | 120.7600229 | 124.5088274 |
| ENSMUSG00000074420 | 1.151585606  | -0.632103393 | 0.790867985 | 0.373837795 | 0.999071534 | Gm10693       | Gm10693       |                | 0.771980369 | 0.711480533 | 0.134640441 | 0           | 0           | 1.964578361 | 1.035444696 | 0           | 0           | 0.71894861  |

|                    |              |              |             |             |             |               |               |            |             |             |             |             |             |             |             |             |             |             |
|--------------------|--------------|--------------|-------------|-------------|-------------|---------------|---------------|------------|-------------|-------------|-------------|-------------|-------------|-------------|-------------|-------------|-------------|-------------|
| ENSMUSG00000070808 | -0.307498236 | 2.825630069  | 0.79061569  | 0.373914019 | 0.999071534 | Gltscr1       | Gltscr1       | GLTSCR1    | 9.825204696 | 9.01208675  | 6.462741153 | 7.007592761 | 7.717502268 | 8.58593506  | 4.853647011 | 6.35558562  | 5.106962581 | 5.424794054 |
| ENSMUSG00000021957 | -0.232482649 | 7.961248862  | 0.790143553 | 0.374056722 | 0.999071534 | Tkt           | Tkt           | TKT        | 252.0165004 | 237.5159179 | 269.4155218 | 313.4683574 | 321.4535902 | 266.1639868 | 158.8113302 | 218.0242198 | 210.7997016 | 249.0830137 |
| ENSMUSG00000079298 | -0.482522105 | 2.078490858  | 0.790095384 | 0.374071285 | 0.999071534 | Klr1b1b       | Klr1b1b       | KLRB1      | 7.018003354 | 7.292675462 | 5.183656966 | 1.734552664 | 3.727946011 | 2.910486461 | 0.906014109 | 5.733843549 | 1.571373102 | 5.359435089 |
| ENSMUSG00000048731 | 0.492697976  | 1.023262201  | 0.790050698 | 0.374084796 | 0.999071534 | Ggnbp1        | Ggnbp1        |            | 1.824680872 | 3.142372354 | 1.077123525 | 0.693821065 | 1.504258917 | 3.710870238 | 2.394465859 | 2.141556024 | 1.649941757 | 1.111102397 |
| ENSMUSG00000019916 | -0.317483468 | 8.515267578  | 0.789639956 | 0.374209017 | 0.999071534 | P4ha1         | P4ha1         | P4HA1      | 324.372115  | 671.0447226 | 305.7011206 | 297.9267655 | 519.8195596 | 179.9408254 | 259.3788963 | 575.0423337 | 215.278115  | 313.5923117 |
| ENSMUSG00000057234 | 0.392946478  | 1.895495099  | 0.789614024 | 0.374216862 | 0.999071534 | Mett115       | Mett115       | METTL15    | 3.158101509 | 3.557402664 | 2.625488593 | 3.538487434 | 3.204725518 | 3.34705943  | 4.659501131 | 5.250266382 | 3.928432755 | 2.156845829 |
| ENSMUSG00000028744 | -0.314559613 | 3.327061235  | 0.789594515 | 0.374222763 | 0.999071534 | Pqlc2         | Pqlc2         | PQLC2      | 13.33420637 | 6.225454663 | 16.2241731  | 9.64411281  | 11.64165596 | 11.78747017 | 8.412988152 | 8.497141644 | 3.8498641   | 11.24174189 |
| ENSMUSG00000078853 | -0.286964469 | 6.127378793  | 0.789591553 | 0.37422366  | 0.999071534 | Igtp          | Igtp          | IRGM       | 92.21656407 | 77.66995817 | 72.23459643 | 84.99308052 | 70.43855884 | 52.67980494 | 19.8028798  | 68.46071032 | 54.05523471 | 104.3129073 |
| ENSMUSG00000030641 | 0.405375798  | 2.486657402  | 0.789261355 | 0.374323569 | 0.999071534 | 463243411Rik  | Ddias         | DDIAS      | 5.403862583 | 4.091013064 | 3.298690797 | 5.966861163 | 5.624620297 | 11.56918368 | 10.74273872 | 2.832380548 | 3.221314859 | 3.202589261 |
| ENSMUSG00000062797 | 0.246055307  | 5.623917854  | 0.789247858 | 0.374327653 | 0.999071534 | I7Rn6         | I7Rn6         | HIKESHI    | 35.58127701 | 39.13142931 | 58.16467038 | 49.05314933 | 51.01399804 | 33.61611862 | 39.41161373 | 50.6374376  | 67.09763145 | 56.47014533 |
| ENSMUSG00000005078 | 0.206938949  | 5.711470422  | 0.789163043 | 0.374353323 | 0.999071534 | Jkamp         | Jkamp         | JKAMP      | 54.38952599 | 45.77191428 | 44.0274241  | 56.96270948 | 50.16376474 | 43.51177259 | 64.78000877 | 49.32487101 | 59.3193346  | 47.18917237 |
| ENSMUSG00000044345 | -0.202286574 | 5.274754795  | 0.788890823 | 0.374435727 | 0.999071534 | Marveld1      | Marveld1      | MARVELD1   | 48.49440318 | 49.03286672 | 35.27579546 | 36.98066279 | 45.19317006 | 57.70039409 | 38.76446079 | 28.94554755 | 20.34928167 | 33.39843086 |
| ENSMUSG00000075122 | -0.568605238 | 1.61879032   | 0.788856516 | 0.374446114 | 0.999071534 | Cd80          | Cd80          | CD80       | 5.54422265  | 4.743203553 | 2.760129034 | 1.387642131 | 3.924153696 | 4.001918884 | 3.17104938  | 2.279720929 | 0           | 2.61435858  |
| ENSMUSG00000039585 | 0.218368877  | 4.380338691  | 0.788825465 | 0.374455515 | 0.999071534 | Myo9a         | Myo9a         | MYO9A      | 20.07148959 | 21.46299608 | 20.73462787 | 17.27614453 | 19.88237873 | 25.46675653 | 16.43768454 | 27.21848624 | 19.2493205  | 18.88874074 |
| ENSMUSG00000028134 | 0.257522739  | 5.756518347  | 0.787955204 | 0.374719144 | 0.999071534 | Ptpb2         | Ptpb2         | PTBP2      | 37.82703808 | 43.16315233 | 75.33132656 | 52.10596202 | 45.65098799 | 40.81957261 | 35.85227259 | 78.68491328 | 64.81914046 | 53.98650468 |
| ENSMUSG00000073755 | 0.213235284  | 4.375700861  | 0.787859234 | 0.374748232 | 0.999071534 | 5730409E04Rik | 5730409E04Rik | C1orf216   | 20.77328993 | 18.43920381 | 18.44574037 | 22.47980252 | 18.77053518 | 26.04885382 | 18.50857394 | 18.79042705 | 20.89926226 | 22.48348379 |
| ENSMUSG00000058799 | 0.240975785  | 9.276767694  | 0.787644034 | 0.37481347  | 0.999071534 | Nap1l1        | Nap1l1        | NAP1L1     | 677.2373237 | 590.8845826 | 499.6695991 | 544.9270648 | 592.4818055 | 782.920858  | 991.3735808 | 457.1185875 | 509.6748656 | 532.6755607 |
| ENSMUSG00000015461 | -0.248148434 | 5.780566335  | 0.787498448 | 0.374857613 | 0.999071534 | Atf6b         | Atf6b         | ATF6B      | 87.30396173 | 69.31006191 | 39.44964912 | 51.06523042 | 63.50588731 | 87.31459383 | 62.90326526 | 33.57407186 | 21.5278115  | 48.36563373 |
| ENSMUSG00000029730 | 0.238087345  | 6.266626044  | 0.787466144 | 0.374867409 | 0.999071534 | Mcm7          | Mcm7          | MCM7       | 101.4803285 | 59.05288423 | 78.69733758 | 48.7062388  | 80.51055332 | 150.6176744 | 92.93116144 | 46.97606763 | 54.44807798 | 72.67916853 |
| ENSMUSG00000020612 | -0.223750918 | 8.47954658   | 0.787460528 | 0.374869112 | 0.999071534 | Prkar1a       | Prkar1a       | PRKAR1A    | 447.3275338 | 399.199869  | 390.6592386 | 367.6557826 | 393.0693952 | 440.7931745 | 386.2855868 | 302.9265537 | 192.9646169 | 302.6773646 |
| ENSMUSG00000030711 | -0.682090187 | 0.05268519   | 0.787366197 | 0.37489772  | 0.999071534 | Sult1a1       | Sult1a1       | SULT1A3    | 1.614140771 | 0.652190488 | 0.740522424 | 1.734552664 | 0.981038424 | 1.018670261 | 0.517722348 | 0.690824524 | 0           | 1.241820326 |
| ENSMUSG00000078994 | 0.444015536  | 2.216882693  | 0.787357148 | 0.374900464 | 0.999071534 | Zfp429        | Zfp429        |            | 1.403600671 | 4.624623464 | 4.106533441 | 2.289609516 | 7.586697145 | 4.729540499 | 5.047792891 | 7.806317121 | 4.949825271 | 2.222204793 |
| ENSMUSG00000027378 | 0.254909334  | 3.936038129  | 0.786900668 | 0.375038944 | 0.999071534 | Nphp1         | Nphp1         | NPHP1      | 15.15888725 | 18.97281421 | 13.26208341 | 8.395234892 | 16.54684808 | 19.20921064 | 20.8383245  | 13.26383086 | 10.99961171 | 16.40510009 |
| ENSMUSG00000037253 | 0.194599531  | 5.843763071  | 0.786606948 | 0.375128086 | 0.999071534 | Mex3c         | Mex3c         | MEX3C      | 53.26664546 | 51.64162868 | 64.29081043 | 54.60371785 | 53.3030877  | 82.14848036 | 70.53966989 | 42.83112048 | 56.80513764 | 44.90160861 |
| ENSMUSG00000043384 | 0.257617552  | 4.290490862  | 0.785988095 | 0.375316001 | 0.999071534 | Gprasp1       | Gprasp1       | GPRASP1    | 15.72032751 | 20.21790514 | 16.5607742  | 21.71659935 | 17.33167882 | 19.35473496 | 11.64875283 | 19.61941648 | 20.03500705 | 30.1958416  |
| ENSMUSG00000003283 | -0.409158855 | 3.489633166  | 0.785545763 | 0.375450396 | 0.999071534 | Hck           | Hck           | HCK        | 22.45761073 | 13.57742017 | 8.751628644 | 7.978942253 | 13.53833025 | 24.37532411 | 11.64875283 | 3.039627905 | 2.907040239 | 8.039152634 |
| ENSMUSG00000023973 | -0.198417926 | 5.578527357  | 0.785485081 | 0.375468839 | 0.999071534 | Cnpy3         | Cnpy3         | CNPY3      | 46.81008237 | 48.67712646 | 58.77055236 | 43.01690606 | 67.88785894 | 59.66497245 | 45.23599014 | 52.77899363 | 26.63477408 | 34.18273844 |
| ENSMUSG00000098238 | -0.390737842 | 2.313752109  | 0.785084008 | 0.375590765 | 0.999071534 | Gm8756        | Gm8756        |            | 4.210802013 | 6.403324796 | 8.280387102 | 3.052812688 | 6.671061283 | 2.619437815 | 3.365195261 | 5.043019025 | 2.514196963 | 6.470537486 |
| ENSMUSG00000036918 | -0.275227729 | 5.025821582  | 0.785006751 | 0.375614258 | 0.999071534 | Ttc7          | Ttc7          | TTC7A      | 52.70520519 | 43.10386228 | 25.31240285 | 29.6955416  | 34.53255252 | 61.84783729 | 25.8214021  | 18.30684988 | 11.70672961 | 33.00627707 |
| ENSMUSG00000025745 | -0.225339038 | 6.124990932  | 0.784851702 | 0.375661412 | 0.999071534 | Hadha         | Hadha         | HADHA      | 87.79522196 | 111.4652835 | 55.20258068 | 57.10147369 | 80.3797482  | 103.4677937 | 78.30550511 | 46.56157291 | 40.22715141 | 51.63358196 |
| ENSMUSG00000011096 | 0.186466843  | 5.573972339  | 0.784807632 | 0.375674816 | 0.999071534 | Akt1s1        | Akt1s1        | AKT1S1     | 41.89748002 | 50.21866761 | 49.27840129 | 37.25819122 | 52.58365952 | 56.1723887  | 39.34689844 | 52.70991118 | 47.92687961 | 46.47022376 |
| ENSMUSG00000016757 | -0.20566785  | 6.216393667  | 0.784711912 | 0.375703932 | 0.999071534 | Ttll2         | Ttll2         | TTL12      | 81.33865887 | 86.20772457 | 78.83197802 | 69.79839919 | 97.77682959 | 120.275853  | 64.13285584 | 45.93983084 | 43.60560358 | 71.30663027 |
| ENSMUSG00000019942 | 0.273675377  | 7.848356459  | 0.784613408 | 0.375733899 | 0.999071534 | Cdk1          | Cdk1          | CDK1       | 258.1221634 | 110.2794826 | 245.651484  | 246.167714  | 219.294789  | 260.4157761 | 364.282387  | 149.1490147 | 223.3706864 | 217.5799928 |
| ENSMUSG00000079652 | 0.8055569    | 0.22639674   | 0.784351494 | 0.375813593 | 0.999071534 | Fam71f2       | Fam71f2       | AC018638.1 | 0.070180034 | 0.948640711 | 1.346404407 | 0.832585279 | 0.719428178 | 0.145524323 | 0.064715293 | 2.625133191 | 1.257098482 | 2.0261279   |
| ENSMUSG00000030298 | 0.255111986  | 6.635159487  | 0.784276237 | 0.375836497 | 0.999071534 | Sec13         | Sec13         | SEC13      | 119.165697  | 88.46074626 | 95.66203311 | 67.16187914 | 101.897191  | 129.4438853 | 198.1582286 | 71.77666804 | 59.47647191 | 74.24778368 |
| ENSMUSG00000053461 | -0.846733587 | -0.423855356 | 0.784225175 | 0.375852038 | 0.999071534 | Hhpl2         | Hhpl2         | HHIPL2     | 0.912340436 | 1.126510844 | 0.807842644 | 0           | 1.24264867  | 0.363810808 | 0.323576467 | 0.759906976 | 0           | 0.653589645 |
| ENSMUSG00000028868 | -0.204705126 | 6.135894914  | 0.784174649 | 0.375867417 | 0.999071534 | Wasf2         | Wasf2         | WASF2      | 73.12759495 | 92.67033941 | 77.01433207 | 62.02760325 | 86.59299155 | 96.91919915 | 41.93551017 | 71.98391539 | 41.6413872  | 69.73801513 |
| ENSMUSG00000074102 | -0.201572616 | 5.360488053  | 0.783980434 | 0.375926539 | 0.999071534 | Rbm15b        | Rbm15b        | RBM15B     | 40.77459949 | 45.71262424 | 38.84376714 | 47.6655072  | 54.34952869 | 65.12213456 | 29.63960441 | 35.09388582 | 25.92765618 | 33.85594361 |
| ENSMUSG00000097183 | 0.359922423  | 2.907536022  | 0.78379452  | 0.375983147 | 0.999071534 | Gm17501       | Gm17501       |            | 5.403862583 | 3.49811262  | 10.03071283 | 7.215739081 | 7.259684337 | 5.893735083 | 8.154126978 | 12.36575898 | 4.478413341 | 8.954178137 |

|                    |              |              |             |             |             |          |          |               |             |             |             |             |             |              |             |             |             |             |
|--------------------|--------------|--------------|-------------|-------------|-------------|----------|----------|---------------|-------------|-------------|-------------|-------------|-------------|--------------|-------------|-------------|-------------|-------------|
| ENSMUSG00000040738 | 0.193755383  | 5.329003422  | 0.783745193 | 0.375998168 | 0.999071534 | Ints8    | Ints8    | INTS8         | 35.65145704 | 43.75605277 | 37.96860427 | 31.15256584 | 46.17420849 | 49.69655632  | 54.94328416 | 35.78471034 | 26.47763677 | 42.54868589 |
| ENSMUSG00000072949 | -0.734688036 | 0.480810888  | 0.783738353 | 0.376000252 | 0.999071534 | Acot1    | Acot1    | ACOT1         | 1.122880537 | 3.972432975 | 0.269280881 | 1.387642131 | 1.373453794 | 1.673529715  | 1.423736457 | 1.312566595 | 0.31427462  | 0           |
| ENSMUSG00000028347 | -0.391147796 | 2.516345779  | 0.783613353 | 0.376038321 | 0.999071534 | Tmeff1   | Tmeff1   | TMEFF1        | 4.702062247 | 5.632554219 | 9.963392611 | 7.978942253 | 4.381971627 | 4.584016176  | 2.135604685 | 7.737234668 | 4.478413341 | 4.052255799 |
| ENSMUSG00000020611 | -0.213338486 | 6.508116085  | 0.783159373 | 0.376176663 | 0.999071534 | Gna13    | Gna13    | GNA13         | 93.69034478 | 133.1061497 | 93.9790276  | 88.80909638 | 97.77682959 | 94.22699917  | 58.5673406  | 117.9237462 | 62.85492408 | 73.4634761  |
| ENSMUSG00000023809 | -0.313218152 | 4.3720573    | 0.782431999 | 0.376398379 | 0.999071534 | Rps6ka2  | Rps6ka2  | RPS6KA2       | 30.10723439 | 28.51851136 | 17.16665619 | 19.14946141 | 23.93733754 | 45.91292392  | 17.34369865 | 11.05319238 | 6.128355098 | 15.35935666 |
| ENSMUSG00000034303 | 0.714599882  | 0.514637317  | 0.782064168 | 0.376510587 | 0.999071534 | Ccdc15   | Ccdc15   | CCDC15        | 1.122880537 | 0           | 1.413724627 | 1.110113705 | 1.504258917 | 0.654859454  | 0.517722348 | 0.967154334 | 2.592765618 | 2.679717545 |
| ENSMUSG00000020738 | 0.258211929  | 8.428970557  | 0.781873596 | 0.376568739 | 0.999071534 | Sumo2    | Sumo2    | SUMO2         | 228.6465493 | 225.1242986 | 411.9997485 | 378.4793912 | 377.3073778 | 282.2444245  | 360.5289    | 384.4438476 | 338.8666094 | 413.4608095 |
| ENSMUSG00000057841 | 0.272869042  | 10.46321743  | 0.78087903  | 0.376872436 | 0.999071534 | Rpl32    | Rpl32    | RPL32         | 1434.128985 | 1021.982495 | 1403.491954 | 1661.215777 | 1079.338474 | 871.8362194  | 1742.070985 | 1466.896794 | 1643.499127 | 1488.94257  |
| ENSMUSG00000004665 | -0.218648651 | 9.479462715  | 0.780481387 | 0.376993955 | 0.999071534 | Cnn2     | Cnn2     | CNN2          | 706.4322176 | 782.9250364 | 847.5615741 | 790.8172504 | 854.8768826 | 834.727517   | 606.4470152 | 698.5617586 | 452.7911593 | 634.8316222 |
| ENSMUSG00000013033 | -0.364752949 | 3.825489921  | 0.780157712 | 0.37709291  | 0.999071534 | Lphn1    | Adgr11   | ADGRL1        | 7.860163757 | 20.6922255  | 28.20717232 | 16.23541293 | 8.567735569 | 22.70179439  | 5.565515239 | 9.947873145 | 13.74951464 | 8.169870563 |
| ENSMUSG00000050921 | -0.417308712 | 1.807122136  | 0.779938438 | 0.377159968 | 0.999071534 | P2ry10   | P2ry10   | P2RY10        | 5.052962415 | 4.921073686 | 3.164050356 | 3.052812688 | 3.858751134 | 3.710870238  | 2.070898391 | 1.243484143 | 4.00700141  | 2.679717545 |
| ENSMUSG00000045210 | 0.225663162  | 5.530333416  | 0.779799296 | 0.377202529 | 0.999071534 | Vcpi1    | Vcpi1    | VCPI1         | 30.52831459 | 44.11179304 | 47.39343512 | 45.86157243 | 52.25664672 | 44.8214915   | 31.7752091  | 63.90126846 | 50.20537061 | 44.44409586 |
| ENSMUSG00000074657 | 0.396108961  | 2.134081641  | 0.779350422 | 0.377339877 | 0.999071534 | Klf5a    | Klf5a    | KLF5A         | 4.210802013 | 2.845922132 | 3.769932339 | 4.371072713 | 3.858751134 | 3.710870238  | 1.941458804 | 6.839162787 | 4.792687961 | 5.555511983 |
| ENSMUSG00000020142 | -0.223001206 | 4.441062736  | 0.779218608 | 0.377380224 | 0.999071534 | Slc1a4   | Slc1a4   | SLC1A4        | 20.70310989 | 32.3130742  | 21.54247051 | 20.81463196 | 25.57240158 | 24.59361059  | 18.24971276 | 24.5242706  | 11.78529826 | 18.49658695 |
| ENSMUSG00000046157 | -0.354073747 | 2.827105619  | 0.779213298 | 0.377381849 | 0.999071534 | Tmem229b | Tmem229b | TMEM229B      | 9.895384729 | 10.43504782 | 8.280387102 | 4.856747458 | 7.325086899 | 12.2968053   | 5.694945826 | 5.526596192 | 2.121353688 | 5.555511983 |
| ENSMUSG00000046675 | 0.206818064  | 4.396292062  | 0.779080392 | 0.377422536 | 0.999071534 | Tmem251  | Tmem251  | TMEM251       | 20.49256979 | 18.49849386 | 20.12874588 | 22.2022741  | 19.29375567 | 23.0656052   | 23.42693624 | 20.37932346 | 19.2493205  | 21.76453518 |
| ENSMUSG00000051695 | 0.256538021  | 8.057133286  | 0.778859157 | 0.377490277 | 0.999071534 | Pcbp1    | Pcbp1    | PCBP1         | 168.5022605 | 206.6258048 | 304.7586375 | 270.243305  | 305.9531831 | 287.847111   | 192.7868593 | 293.2550104 | 312.7818159 | 287.18729   |
| ENSMUSG00000028600 | -0.677125944 | 0.596483833  | 0.778530508 | 0.37759094  | 0.999071534 | Podn     | Podn     | PODN          | 0.701800335 | 2.608761954 | 3.433331237 | 0.763203172 | 1.24264867  | 2.328389169  | 0.453007054 | 1.036236786 | 0           | 1.633974113 |
| ENSMUSG00000078656 | -0.190223321 | 5.813040422  | 0.778185078 | 0.377696783 | 0.999071534 | Vps25    | Vps25    | VPS25         | 54.10880586 | 52.70884948 | 71.02283246 | 61.19501798 | 71.15798702 | 58.50077786  | 60.18522294 | 57.40751794 | 29.69895163 | 50.58783853 |
| ENSMUSG00000032577 | -0.459030681 | 3.060335886  | 0.778074019 | 0.377730821 | 0.999071534 | Mapkapk3 | Mapkapk3 | MAPKAPK3      | 18.10644865 | 14.11103057 | 4.847055865 | 5.203657991 | 7.521294584 | 13.09718907  | 7.895265804 | 6.700997882 | 0.628549241 | 7.25484506  |
| ENSMUSG00000030339 | -0.206706687 | 6.183915093  | 0.77783288  | 0.377804743 | 0.999071534 | Ltbr     | Ltbr     | LTBR          | 106.1823907 | 75.65409666 | 70.08034938 | 73.61441505 | 79.07169697 | 92.77175594  | 85.55361798 | 57.82201265 | 33.70595304 | 64.90145175 |
| ENSMUSG00000057229 | -0.280818216 | 3.084968922  | 0.777485839 | 0.377911164 | 0.999071534 | Atp5sl   | Atp5sl   | ATP5SL        | 10.38664496 | 10.5536279  | 8.347707322 | 8.533999106 | 9.810384239 | 8.658697221  | 6.924536402 | 8.22081835  | 5.814080477 | 6.928050238 |
| ENSMUSG00000051444 | 0.292798632  | 3.606706961  | 0.777250421 | 0.37798338  | 0.999071534 | Bbs12    | Bbs12    | BBS12         | 16.42212785 | 9.901437416 | 9.492151068 | 7.909560147 | 12.88430463 | 12.87890259  | 17.21426807 | 8.497141644 | 7.542590889 | 18.62730488 |
| ENSMUSG00000095545 | 0.759311063  | 0.010140103  | 0.777204171 | 0.37799757  | 0.999071534 | Gm4245   | Gm4245   |               | 1.122880537 | 1.067220799 | 0           | 0.763203172 | 0.39241537  | 0.9459081    | 2.847472913 | 0.483577167 | 0.392843275 | 0.71894861  |
| ENSMUSG00000015943 | 0.261794479  | 4.590780444  | 0.777194442 | 0.378000555 | 0.999071534 | Bola1    | Bola1    | BOLA1         | 26.38769261 | 11.91729893 | 22.75423448 | 31.36071216 | 19.94778129 | 23.57494033  | 27.43928444 | 18.44501479 | 28.04900987 | 26.40502166 |
| ENSMUSG00000086691 | -1.621570474 | 0.849888243  | 0.777092875 | 0.378031719 | 0.999071534 | Gm15432  | Gm15432  |               | 13.33420637 | 0           | 0           | 0           | 0           | 3.783632399  | 0.841298815 | 0           | 0           | 0           |
| ENSMUSG00000033825 | -0.785322836 | 2.223847752  | 0.776892877 | 0.378093096 | 0.999071534 | Tpsb2    | Tpsb2    | TPSD1         | 14.59744698 | 9.130666839 | 2.221567271 | 1.457024238 | 2.746907587 | 13.53376204  | 3.947632902 | 0.27632981  | 0           | 0.849666539 |
| ENSMUSG00000055116 | -0.314665185 | 3.205199331  | 0.776807949 | 0.378119164 | 0.999071534 | Arntl    | Arntl    | ARNTL         | 9.755024662 | 12.45090933 | 8.280387102 | 5.61995063  | 16.67765321 | 8.14936209   | 7.701119924 | 9.187966168 | 4.949825271 | 9.346331924 |
| ENSMUSG00000037432 | -0.608529985 | 0.422140316  | 0.776729045 | 0.378143385 | 0.999071534 | Fer1l5   | Fer1l5   | FER1L5        | 0.912340436 | 1.778701332 | 1.413724627 | 1.387642131 | 2.027479409 | 1.382481069  | 1.29430587  | 1.312566595 | 0           | 0.784307574 |
| ENSMUSG00000022340 | -0.720897824 | -0.092753962 | 0.776454987 | 0.378227528 | 0.999071534 | Sybu     | Sybu     | SYBU          | 0.421080201 | 2.371601776 | 0.538561763 | 0.20814632  | 1.63506404  | 0.9459081    | 0.711868228 | 0.483577167 | 0.078568655 | 0.784307574 |
| ENSMUSG00000068267 | -0.218632617 | 7.549896662  | 0.776186181 | 0.378310085 | 0.999071534 | Cenpb    | Cenpb    | CENPB         | 222.8216065 | 234.3735455 | 204.384189  | 181.1566802 | 204.9062255 | 256.4866194  | 164.053269  | 186.0390443 | 99.46719135 | 152.5478232 |
| ENSMUSG00000043289 | 0.978335898  | -0.110680741 | 0.775970837 | 0.378376241 | 0.999071534 | Mei4     | Mei4     | MEI4          | 0.070180034 | 0.415030311 | 0           | 1.526406344 | 0.784830739 | 0.0727262162 | 0.582437641 | 0.069082452 | 2.671334273 | 1.30717929  |
| ENSMUSG00000040824 | 0.258880602  | 7.591296842  | 0.775924926 | 0.378390347 | 0.999071534 | Snrpd2   | Snrpd2   | SNRPD2        | 180.5732263 | 116.5049373 | 229.0907098 | 213.9050345 | 166.4495193 | 161.3137121  | 216.4079414 | 168.0085242 | 247.0984203 | 190.6520995 |
| ENSMUSG00000025104 | 0.49254794   | 0.665690732  | 0.775859886 | 0.378410332 | 0.999071534 | Hdgfrp3  | Hdgfrp3  | RP11-382A20.3 | 1.122880537 | 1.422961066 | 1.750325729 | 0.693821065 | 1.308051232 | 1.236956746  | 1.617882337 | 1.381649048 | 1.571373102 | 2.287563758 |
| ENSMUSG00000052962 | 0.189377205  | 5.162972977  | 0.775554636 | 0.378504148 | 0.999071534 | Mrpl35   | Mrpl35   | MRPL35        | 39.09027868 | 27.80703083 | 34.80455392 | 34.13599642 | 37.34486267 | 41.18338342  | 36.82300199 | 30.87985622 | 35.04162017 | 38.95394284 |
| ENSMUSG00000022885 | -0.321680533 | 4.700882829  | 0.77505305  | 0.378658376 | 0.999071534 | St6gal1  | St6gal1  | ST6GAL1       | 40.35351929 | 42.03664148 | 18.37842015 | 21.99412778 | 27.33827075 | 49.40550767  | 34.36382084 | 11.32952219 | 9.899650542 | 13.26786979 |
| ENSMUSG00000086914 | -0.738493805 | 0.157263244  | 0.77484276  | 0.378723063 | 0.999071534 | Gm16124  | Gm16124  |               | 2.035220973 | 1.897281421 | 0.403921322 | 1.457024238 | 0.588623054 | 0.9459081    | 0.388291761 | 0.759906976 | 1.335667137 | 0           |
| ENSMUSG00000083307 | -0.35007196  | 2.448154455  | 0.774628926 | 0.378788855 | 0.999071534 | AA414768 | AA414768 |               | 8.983044293 | 6.818355107 | 3.298690797 | 5.273040098 | 6.736463844 | 5.820972922  | 5.889091707 | 4.62852431  | 3.142746204 | 3.398666154 |
| ENSMUSG00000026177 | -0.308323387 | 4.073673518  | 0.774038617 | 0.378970566 | 0.999071534 | Slc11a1  | Slc11a1  | SLC11A1       | 29.05453389 | 28.10348105 | 12.2522801  | 9.64411281  | 17.85489932 | 27.64962138  | 16.04939278 | 13.19474841 | 6.285492408 | 12.48356222 |

|                     |              |              |             |             |             |               |          |          |             |             |             |             |             |             |             |             |             |             |
|---------------------|--------------|--------------|-------------|-------------|-------------|---------------|----------|----------|-------------|-------------|-------------|-------------|-------------|-------------|-------------|-------------|-------------|-------------|
| ENSMUSG00000057469  | 0.392768355  | 3.406355648  | 0.773697716 | 0.37907556  | 0.999071534 | E2f6          | E2f6     | E2F6     | 15.01852718 | 10.37575777 | 4.981696305 | 6.521918016 | 10.46440986 | 23.42941601 | 21.03247038 | 6.148338263 | 5.028393926 | 5.097999231 |
| ENSMUSG00000034320  | 0.223307223  | 5.154482644  | 0.773641498 | 0.379092878 | 0.999071534 | Slc26a2       | Slc26a2  | SLC26A2  | 39.86225905 | 24.84252861 | 38.84376714 | 33.23402904 | 33.09369617 | 35.72622131 | 26.98627738 | 31.29435093 | 45.25554534 | 40.91471178 |
| ENSMUSG00000068917  | 0.255225379  | 5.248799048  | 0.772618863 | 0.379408103 | 0.999071534 | Clk2          | Clk2     | CLK2     | 32.70389563 | 30.35650274 | 43.690823   | 35.17672802 | 37.21405755 | 34.34374024 | 17.73199041 | 50.29202534 | 35.04162017 | 58.88842702 |
| ENSMUSG00000006941  | 0.221952898  | 5.739208278  | 0.77260693  | 0.379411784 | 0.999071534 | Eif1b         | Eif1b    | EIF1B    | 33.12497583 | 50.10008752 | 52.98101341 | 56.82394526 | 61.60921302 | 39.00051858 | 53.39011712 | 69.98052428 | 50.12680195 | 58.88842702 |
| ENSMUSG00000029502  | -0.214517673 | 5.450114306  | 0.772578347 | 0.3794206   | 0.999071534 | Golga3        | Golga3   | GOLGA3   | 38.87973858 | 68.8950316  | 41.87317705 | 38.85397967 | 55.33056711 | 56.31791302 | 28.60415972 | 48.97945875 | 25.53481291 | 39.15001974 |
| ENSMUSG00000042510  | 0.470571371  | 1.217463243  | 0.772140616 | 0.379555649 | 0.999071534 | AA986860      | AA986860 | C1orf116 | 2.526481208 | 1.956571465 | 2.086926831 | 1.040731598 | 2.027479409 | 1.746291877 | 1.229590576 | 2.832380548 | 3.771295445 | 2.222204793 |
| ENSMUSG00000027677  | 0.188523328  | 5.696432677  | 0.772012253 | 0.379595265 | 0.999071534 | Ttc14         | Ttc14    | TTC14    | 48.14350301 | 49.62576717 | 53.85617627 | 48.01241773 | 51.27560829 | 49.33274551 | 42.6473784  | 63.07227904 | 49.3411154  | 58.23483737 |
| ENSMUSG00000081944  | 0.591493147  | 0.566278068  | 0.771833416 | 0.379650467 | 0.999071534 | Gm12276       | Gm12276  |          | 0.561440268 | 0.652190488 | 1.077123255 | 2.497755836 | 0.719428178 | 0.727621615 | 0.776583522 | 1.934308667 | 1.964216377 | 2.156845829 |
| ENSMUSG00000037617  | 0.397389754  | 2.428915492  | 0.771695747 | 0.37969297  | 0.999071534 | Spag1         | Spag1    | SPAG1    | 3.579181711 | 4.091013064 | 3.500651458 | 5.897479057 | 6.409451036 | 3.274297269 | 2.718042326 | 7.668152216 | 6.678335683 | 7.450921954 |
| ENSMUSG00000097839  | 0.543113115  | 2.514782541  | 0.771228048 | 0.379837414 | 0.999071534 | Gm26909       | Gm26909  |          | 3.228281543 | 0.770770577 | 9.559471289 | 6.938210655 | 2.87771271  | 2.910486461 | 3.041618794 | 4.490359406 | 13.74951464 | 5.163358196 |
| ENSMUSG00000073680  | -0.464040632 | 1.050899376  | 0.771066492 | 0.379887327 | 0.999071534 | Tmem88b       | Tmem88b  | TMEM88B  | 2.17558104  | 1.363671021 | 3.769932339 | 1.873316877 | 2.485297341 | 2.182864846 | 0.776583522 | 1.72706131  | 1.335667137 | 1.895409971 |
| ENSMUSG00000058586  | -0.310388904 | 4.616753938  | 0.770818527 | 0.379963953 | 0.999071534 | Serhl         | Serhl    | SERHL2   | 34.59875654 | 20.75151554 | 29.35161607 | 39.82532916 | 14.45396611 | 10.4049891  | 17.92613629 | 19.89574629 | 27.49902928 | 24.64032962 |
| ENSMUSG00000090812  | -0.611560754 | 0.307670454  | 0.769997    | 0.38021798  | 0.999071534 | Samd15        | Samd15   | SAMD15   | 1.333420637 | 0.592900444 | 1.88496617  | 2.497755836 | 0.523220493 | 0.582097292 | 0.906014109 | 0.483577167 | 0.628549241 | 1.568615148 |
| ENSMUSG00000035208  | -0.240516303 | 4.202415212  | 0.769547912 | 0.380356946 | 0.999071534 | Slfn8         | Slfn8    | SLFN13   | 18.38716879 | 22.58950692 | 20.1960661  | 16.44355925 | 25.50699902 | 24.44808627 | 11.26046107 | 20.44840591 | 9.585375922 | 17.1240487  |
| ENSMUSG00000020936  | 0.258989292  | 7.609898506  | 0.769280431 | 0.380439749 | 0.999071534 | Nmt1          | Nmt1     | NMT1     | 143.1672684 | 162.7511719 | 220.4064014 | 182.7524687 | 212.5583252 | 153.8919716 | 130.9190387 | 234.3276785 | 236.0988086 | 239.8673997 |
| ENSMUSG00000014349  | -0.222362935 | 6.850071592  | 0.768918883 | 0.380551713 | 0.999071534 | Ube2z         | Ube2z    | UBE2Z    | 148.8518511 | 164.6484533 | 98.48948236 | 105.1138914 | 129.6278771 | 173.7560417 | 126.2595376 | 82.82986042 | 57.51225553 | 92.48293477 |
| ENSMUSG00000072789  | -0.417920961 | 2.386457581  | 0.76867189  | 0.380628227 | 0.999071534 | Gm10420       | Gm10420  |          | 4.631882214 | 4.150303108 | 4.847055865 | 7.562649614 | 8.960150939 | 4.80230266  | 5.889091707 | 4.352194501 | 0.707117896 | 5.94766577  |
| ENSMUSG000000002900 | -0.233581242 | 8.313211552  | 0.76835457  | 0.380726561 | 0.999071534 | Lamb1         | Lamb1    | LAMB1    | 277.0707724 | 381.5314358 | 401.2958335 | 385.6951303 | 332.5720257 | 434.6811529 | 222.7500402 | 261.0625876 | 221.2493328 | 298.1675961 |
| ENSMUSG00000041815  | -0.192221446 | 6.92510296   | 0.768341018 | 0.380730761 | 0.999071534 | Poldip3       | Poldip3  | POLDIP3  | 136.008905  | 147.2764703 | 142.8535076 | 124.0552065 | 122.0411799 | 147.5616636 | 90.60141087 | 109.8410993 | 92.3967384  | 111.2409576 |
| ENSMUSG00000017299  | 0.215222667  | 4.566769275  | 0.768314402 | 0.380739011 | 0.999071534 | Dnntp1        | Dnntp1   | DNTTIP1  | 22.52779077 | 27.45129056 | 20.39802676 | 18.38625824 | 24.85297341 | 30.70563216 | 22.65035272 | 25.49142493 | 14.29949523 | 31.24158503 |
| ENSMUSG00000025650  | 0.273722469  | 7.692269433  | 0.767953844 | 0.380850792 | 0.999071534 | Col7a1        | Col7a1   | COL7A1   | 203.5922773 | 186.2893195 | 240.9390686 | 157.2198534 | 185.2200544 | 212.7565603 | 101.8618719 | 280.1984269 | 151.716073  | 345.0299736 |
| ENSMUSG00000032312  | -0.206005416 | 6.141070682  | 0.7678108   | 0.380895152 | 0.999071534 | Csk           | Csk      | CSK      | 83.72478002 | 99.19224429 | 74.38884348 | 60.29305059 | 75.6053612  | 101.5032153 | 67.43333581 | 67.83896825 | 31.27032473 | 58.95378598 |
| ENSMUSG00000018845  | -0.442289417 | 1.470265869  | 0.767329281 | 0.381044531 | 0.999071534 | Unc45b        | Unc45b   | UNC45B   | 3.36864161  | 3.083082309 | 3.500651458 | 2.983430582 | 2.812310149 | 2.837724299 | 1.553167044 | 1.4507315   | 0.785686551 | 4.444409586 |
| ENSMUSG00000049305  | -0.209539942 | 4.71668493   | 0.766720352 | 0.381233554 | 0.999071534 | Ccdc71        | Ccdc71   | CCDC71   | 30.03705436 | 26.91768016 | 27.53397012 | 23.17362359 | 38.6529139  | 31.94258891 | 24.98010328 | 26.73490908 | 13.27810271 | 22.74491965 |
| ENSMUSG00000071226  | 0.814464087  | -0.402985211 | 0.766388892 | 0.381336501 | 0.999071534 | Cecr2         | Cecr2    | CECR2    | 0.280720134 | 0.5336104   | 1.077123255 | 0.138764213 | 0.39241537  | 0.727621615 | 0.323576467 | 0.138164905 | 2.199922343 | 0.261435858 |
| ENSMUSG00000040264  | -0.477979927 | 2.608164658  | 0.766193617 | 0.381397169 | 0.999071534 | Gbp5          | Gbp2b    | GBP2     | 11.15862533 | 11.68013875 | 3.971893    | 2.636520049 | 6.998074091 | 4.80230266  | 1.68259763  | 10.29328541 | 1.257098482 | 6.339819557 |
| ENSMUSG00000016356  | 0.637444163  | 1.200776104  | 0.766058899 | 0.381439032 | 0.999071534 | Col20a1       | Col20a1  | COL20A1  | 2.17558104  | 1.837991377 | 1.750325729 | 0.971349492 | 2.158284533 | 0.800383777 | 0.064715293 | 2.279720929 | 2.828471584 | 6.274460592 |
| ENSMUSG00000006267  | 0.244177905  | 4.458900857  | 0.765924336 | 0.381480852 | 0.999071534 | Mysm1         | Mysm1    | MYSM1    | 20.77328993 | 19.6250047  | 28.1398521  | 17.69243717 | 17.65869163 | 18.55435119 | 15.40223985 | 28.94554755 | 22.3920667  | 26.86253441 |
| ENSMUSG00000028965  | -0.368793478 | 8.273340506  | 0.765906541 | 0.381486383 | 0.999071534 | Tnfrsf9       | Tnfrsf9  | TNFRSF9  | 309.0026877 | 687.8830952 | 214.6168624 | 284.6747832 | 320.3417467 | 77.78275067 | 235.498953  | 474.6655304 | 203.0214048 | 268.821421  |
| ENSMUSG00000045045  | -0.222810256 | 4.459160504  | 0.765823341 | 0.381512245 | 0.999071534 | Lrfn4         | Lrfn4    | LRFN4    | 32.6337156  | 23.77530781 | 22.35031315 | 20.53710354 | 23.34871449 | 31.06944297 | 14.30207986 | 21.55372515 | 12.88525944 | 20.0652021  |
| ENSMUSG00000032125  | -0.264644131 | 3.646046025  | 0.765686277 | 0.381554854 | 0.999071534 | Robo4         | Robo4    | ROBO4    | 13.47456644 | 16.12689208 | 13.66600473 | 12.00310443 | 15.04258917 | 19.57302145 | 8.801279913 | 7.046410144 | 8.721120716 | 11.76461361 |
| ENSMUSG000000051256 | 0.248737018  | 5.021741156  | 0.765390243 | 0.381646906 | 0.999071534 | Jagn1         | Jagn1    | JAGN1    | 40.21315922 | 26.85839012 | 25.91828483 | 27.26716787 | 33.74772178 | 42.78415098 | 61.73838998 | 19.34308667 | 21.99922343 | 27.05861131 |
| ENSMUSG000000095403 | 0.255142663  | 6.664904576  | 0.765357199 | 0.381657183 | 0.999071534 | Gm21092       | Gm21092  |          | 63.65329042 | 136.4856822 | 85.16007873 | 68.75766759 | 127.992813  | 97.35577212 | 91.57214027 | 178.0254798 | 73.30455521 | 89.6724993  |
| ENSMUSG000000098428 | -1.332146967 | 2.584879609  | 0.764837022 | 0.381819015 | 0.999071534 | RP24-222L21.1 | Gm2260   |          | 9.404124495 | 20.1586151  | 0           | 0           | 14.78097892 | 2.182864846 | 14.43151045 | 0           | 0           | 0           |
| ENSMUSG000000033106 | 0.210095524  | 5.452383365  | 0.764737213 | 0.381850078 | 0.999071534 | Slc7a6os      | Slc7a6os | SLC7A6OS | 43.932701   | 28.69638149 | 45.44114873 | 52.17534412 | 38.84912159 | 43.14796178 | 43.10038546 | 38.13351372 | 40.0700141  | 59.99952942 |
| ENSMUSG00000002870  | 0.296240986  | 5.667679071  | 0.764681865 | 0.381867305 | 0.999071534 | Mcm2          | Mcm2     | MCM2     | 55.6527666  | 42.21451162 | 51.9712101  | 36.91128068 | 50.35997243 | 138.0298204 | 66.85089816 | 21.00106553 | 30.72034414 | 32.74484122 |
| ENSMUSG000000054690 | -0.230534765 | 5.217237912  | 0.764658196 | 0.381874672 | 0.999071534 | Emcn          | Emcn     | EMCN     | 43.09054059 | 50.39653775 | 40.66141309 | 37.119427   | 36.75623962 | 39.1460429  | 53.06654065 | 24.6624355  | 14.92804447 | 36.92781495 |
| ENSMUSG000000053754 | 0.253072282  | 6.269617963  | 0.763184257 | 0.382333851 | 0.999071534 | Chd8          | Chd8     | CHD8     | 56.2843869  | 73.75681524 | 89.53589305 | 64.17844856 | 81.2299815  | 65.70423185 | 39.34689844 | 82.96802533 | 99.07507408 | 104.5089842 |
| ENSMUSG000000031760 | 0.793167231  | 2.214786325  | 0.763122135 | 0.382353221 | 0.999071534 | Mt3           | Mt3      | MT3      | 13.05348624 | 0.711480533 | 0.336601102 | 1.040731598 | 2.289089656 | 3.783632399 | 20.45003274 | 0.345412262 | 0.628549241 | 3.202589261 |

|                     |              |              |             |             |             |               |               |          |             |             |              |             |             |             |             |             |             |             |
|---------------------|--------------|--------------|-------------|-------------|-------------|---------------|---------------|----------|-------------|-------------|--------------|-------------|-------------|-------------|-------------|-------------|-------------|-------------|
| ENSMUSG00000038170  | -0.189741882 | 5.423873645  | 0.76282858  | 0.382444773 | 0.999071534 | Pde4dip       | Pde4dip       | PDE4DIP  | 36.42343741 | 47.37274548 | 57.89538949  | 44.89022294 | 49.96755706 | 47.14988067 | 33.58727332 | 44.00552217 | 28.20614718 | 41.69901935 |
| ENSMUSG00000020462  | 0.19690216   | 5.877456381  | 0.76209413  | 0.382673964 | 0.999071534 | Ccdc104       | Cfap36        | CFAP36   | 55.09132633 | 44.64540344 | 64.76205197  | 52.31410834 | 67.16843076 | 48.16855093 | 76.49347689 | 59.54907396 | 50.20537061 | 64.83609279 |
| ENSMUSG00000019338  | -0.235406879 | 4.186139317  | 0.762017074 | 0.382698021 | 0.999071534 | Zfp687        | Zfp687        | ZNF687   | 16.49230788 | 23.18240736 | 20.33070654  | 19.28822562 | 22.17146838 | 24.30256195 | 11.907614   | 19.82666384 | 9.271101302 | 16.86261284 |
| ENSMUSG00000032375  | -0.373390634 | 2.215832927  | 0.761967178 | 0.3827136   | 0.999071534 | Aph1b         | Aph1b         | APH1B    | 5.824942784 | 5.988294485 | 3.096730136  | 6.591300122 | 4.839789558 | 2.692199976 | 4.206490476 | 4.835771668 | 2.121353688 | 5.032640267 |
| ENSMUSG00000038876  | 0.201842219  | 5.648534678  | 0.761722393 | 0.382790041 | 0.999071534 | Rnf146        | Rnf146        | RNF146   | 36.07253724 | 46.6019749  | 52.84637297  | 49.19191354 | 56.50781322 | 49.33274551 | 37.92316198 | 57.68384775 | 53.11241085 | 56.14335051 |
| ENSMUSG00000018677  | -0.209004153 | 7.255924392  | 0.761715924 | 0.382792062 | 0.999071534 | Slc25a39      | Slc25a39      | SLC25A39 | 192.9249122 | 150.5374227 | 169.5123148  | 152.4324881 | 186.331898  | 173.901566  | 167.3537489 | 111.7063255 | 88.15403102 | 154.8353869 |
| ENSMUSG00000001305  | 0.32108736   | 4.597483007  | 0.761491912 | 0.382862036 | 0.999071534 | Rrp15         | Rrp15         | RRP15    | 36.70415754 | 18.32062372 | 19.1862628   | 17.76181928 | 19.68617104 | 51.22456171 | 42.51794782 | 9.257048621 | 12.72812213 | 20.52271485 |
| ENSMUSG00000075416  | 0.693545677  | 0.05948248   | 0.761466018 | 0.382870125 | 0.999071534 | Gm14488       | Gm14488       |          | 0.701800335 | 0.415030311 | 0.5385861763 | 1.248877918 | 0.654025616 | 0.363810808 | 0.647152935 | 0.967154334 | 0.235705965 | 3.202589261 |
| ENSMUSG00000063975  | -0.499544772 | 1.284157961  | 0.760965619 | 0.383026504 | 0.999071534 | Slco1a5       | Slco1a5       | SLCO1A2  | 5.403862583 | 2.845922132 | 2.692808814  | 1.80393477  | 1.308051232 | 2.473913492 | 3.882917609 | 1.381649048 | 0.785686551 | 0.915025503 |
| ENSMUSG00000001333  | -0.507672719 | 2.551550134  | 0.760886805 | 0.383051142 | 0.999071534 | Sync          | Sync          | SYNC     | 7.158363421 | 11.68013875 | 3.366011017  | 2.567137942 | 10.52981242 | 10.98708639 | 5.889091707 | 5.18118393  | 0.392843275 | 2.222204793 |
| ENSMUSG00000009035  | -0.196566242 | 6.681795619  | 0.760373875 | 0.383211545 | 0.999071534 | Tmem184b      | Tmem184b      | TMEM184B | 107.6561715 | 135.4777515 | 100.8456901  | 97.41247759 | 128.5814361 | 113.6544963 | 79.01737334 | 110.7391712 | 58.21937343 | 105.8815225 |
| ENSMUSG000000098123 | -0.425504725 | 1.856819261  | 0.760000423 | 0.38332839  | 0.999071534 | Gm4518        | Gm4518        |          | 3.649361744 | 3.913142931 | 4.779735644  | 3.538487434 | 4.90519212  | 1.819054038 | 1.812028217 | 3.661369977 | 4.635550651 | 1.699333077 |
| ENSMUSG00000001604  | 0.425239385  | 2.068049921  | 0.759945644 | 0.383345534 | 0.999071534 | Tcea3         | Tcea3         | TCEA3    | 3.228281543 | 1.660121243 | 2.558168373  | 3.81601586  | 6.801866406 | 4.656778337 | 2.9769035   | 2.694215643 | 6.364061063 | 5.22871716  |
| ENSMUSG00000025871  | -0.188155066 | 5.739056881  | 0.759643079 | 0.383440243 | 0.999071534 | 4833439L19Rik | 4833439L19Rik | KIAA1191 | 66.17977163 | 71.85953382 | 50.75944614  | 52.24472623 | 54.08791844 | 76.47303176 | 50.73679009 | 38.13351372 | 40.22715141 | 39.60753249 |
| ENSMUSG000000011884 | -0.193212666 | 5.683247593  | 0.759624329 | 0.383446113 | 0.999071534 | Gltp          | Gltp          | GLTP     | 45.8275619  | 48.49925632 | 64.22349021  | 49.46944197 | 76.39019194 | 65.26765889 | 41.35307253 | 52.70991118 | 29.93465759 | 46.14342894 |
| ENSMUSG000000054520 | -0.216269359 | 5.080017957  | 0.759479766 | 0.383491378 | 0.999071534 | Sh3bp2        | Sh3bp2        | SH3BP2   | 51.37178455 | 42.21451162 | 29.75553739  | 27.68346051 | 38.06429085 | 49.62379416 | 29.57488912 | 29.84361943 | 15.47802505 | 31.37230296 |
| ENSMUSG00000027508  | -0.330338517 | 2.67115908   | 0.759478177 | 0.383491875 | 0.999071534 | Pag1          | Pag1          | PAG1     | 8.351423991 | 8.300606217 | 6.664701814  | 6.799446442 | 5.951633105 | 10.62327558 | 3.882917609 | 3.661369977 | 4.00700141  | 5.490153018 |
| ENSMUSG000000051518 | 0.192340589  | 5.619683188  | 0.759293734 | 0.383549637 | 0.999071534 | Rps19bp1      | Rps19bp1      | RPS19BP1 | 41.12549966 | 40.79155055 | 54.86597958  | 44.82084083 | 56.04999529 | 49.33274551 | 68.98650285 | 41.9330486  | 41.6413872  | 49.99960785 |
| ENSMUSG000000048915 | 0.283610639  | 4.978769557  | 0.75923306  | 0.383568641 | 0.999071534 | EfnA5         | EfnA5         | EFNA5    | 23.51031124 | 18.5577839  | 39.85357044  | 31.01380163 | 33.68231922 | 24.81189708 | 17.14955277 | 42.34754332 | 45.64838861 | 29.41153403 |
| ENSMUSG000000031549 | 0.822149572  | -0.397981358 | 0.759195984 | 0.383580255 | 0.999071534 | Ido2          | Ido2          | IDO2     | 0           | 0.355740266 | 0.673202203  | 0.624438959 | 0.719428178 | 0.582097292 | 0.064715293 | 0.552659619 | 1.492804447 | 1.045743432 |
| ENSMUSG00000040550  | 0.19514521   | 5.157822941  | 0.758886004 | 0.38367737  | 0.999071534 | Otud6b        | Otud6b        | OTUD6B   | 38.52883841 | 32.43165429 | 32.4483462   | 30.45874478 | 38.71831646 | 54.6443833  | 44.20054545 | 25.21509512 | 29.85608894 | 32.67948225 |
| ENSMUSG000000025401 | 0.607162977  | 0.891046635  | 0.75853169  | 0.383788418 | 0.999071534 | Myo1a         | Myo1a         | MYO1A    | 2.526481208 | 0.948640711 | 0.538561763  | 1.040731598 | 2.092881971 | 0.509335131 | 0.776583522 | 3.17779281  | 0.785686551 | 4.64048648  |
| ENSMUSG000000083621 | -1.236552107 | 0.595515129  | 0.758359835 | 0.383842296 | 0.999071534 | Gm14586       | Gm14586       |          | 5.895122818 | 0           | 0.942483085  | 3.122194795 | 0           | 0           | 2.329750565 | 0           | 0           | 1.633974113 |
| ENSMUSG000000000740 | -0.298239527 | 10.31172606  | 0.758118289 | 0.383918042 | 0.999071534 | Rpl13         | Rpl13         | RPL13    | 1912.405914 | 806.2853139 | 1690.208772  | 1954.077649 | 857.8199979 | 975.5222995 | 820.2663449 | 846.1218769 | 1295.832829 | 1431.165246 |
| ENSMUSG000000082229 | -0.54219875  | 1.211431986  | 0.75810551  | 0.383922049 | 0.999071534 | Nap1l2        | Nap1l2        | NAP1L2   | 1.684320805 | 2.905212176 | 1.009803305  | 5.481186417 | 2.158284533 | 1.164194584 | 0.647152935 | 2.141556024 | 2.985608894 | 1.176461361 |
| ENSMUSG000000084911 | -0.601684939 | 0.734728181  | 0.757821818 | 0.38401104  | 0.999071534 | Gm16185       | Gm16185       |          | 1.894860906 | 1.422961066 | 2.894769475  | 1.387642131 | 1.962076848 | 1.382481069 | 1.423736457 | 2.486968286 | 0           | 0.71894861  |
| ENSMUSG000000041096 | 0.221154373  | 4.91796624   | 0.757791224 | 0.384020639 | 0.999071534 | Tsplyl2       | Tsplyl2       | TSPYL2   | 27.30003305 | 26.79910007 | 29.82285761  | 23.3123878  | 37.54107036 | 30.19629703 | 19.93231039 | 41.10405917 | 25.61338156 | 38.49643009 |
| ENSMUSG000000021714 | 0.435000312  | 2.913076834  | 0.757655499 | 0.384063225 | 0.999071534 | Cenpk         | Cenpk         | CENPK    | 7.789983723 | 0.948640711 | 7.472544458  | 10.26855177 | 5.886230544 | 8.222124252 | 10.74273872 | 3.661369977 | 7.6997282   | 10.58815225 |
| ENSMUSG000000029484 | 0.231919298  | 7.941612419  | 0.756880908 | 0.384306401 | 0.999071534 | Anxa3         | Anxa3         | ANXA3    | 267.3157478 | 186.6450598 | 253.8645509  | 243.6005761 | 220.2104249 | 235.5311168 | 333.8014838 | 216.9189005 | 249.6911859 | 229.5406833 |
| ENSMUSG000000029408 | 0.438941529  | 2.74568865   | 0.75687064  | 0.384309626 | 0.999071534 | Abcb9         | Abcb9         | ABCB9    | 6.456563086 | 3.379532531 | 7.203263577  | 6.938210655 | 4.90519212  | 2.328389169 | 2.459181152 | 8.35897674  | 9.428238612 | 12.09140843 |
| ENSMUSG000000023964 | 1.282002507  | -0.601553675 | 0.756866908 | 0.384310798 | 0.999071534 | Calcr         | Calcr         | CALCR    | 1.333420637 | 0           | 0            | 0           | 0.261610246 | 0.509335131 | 2.394465859 | 0           | 0           | 0.784307574 |
| ENSMUSG000000026222 | -0.19559803  | 4.935548657  | 0.756539316 | 0.384413709 | 0.999071534 | Sp100         | Sp100         | SP100    | 32.4231755  | 31.95733394 | 42.14245793  | 27.89160683 | 34.72876021 | 37.69079967 | 21.67962332 | 28.25472303 | 19.64216377 | 31.96053364 |
| ENSMUSG000000046186 | -0.273699381 | 4.603560032  | 0.755695631 | 0.38467893  | 0.999071534 | Cd109         | Cd109         | CD109    | 24.49283171 | 49.62576717 | 27.39932968  | 18.10872981 | 18.24731469 | 30.92391865 | 30.22204205 | 20.24115855 | 12.17814154 | 14.96720287 |
| ENSMUSG000000093916 | -0.517185913 | 1.183365386  | 0.755564614 | 0.38472014  | 0.999071534 | Gm379         | Gm379         |          | 3.719541778 | 2.253021687 | 2.086926831  | 2.428373729 | 2.616102464 | 0.582097292 | 3.106334087 | 1.105319238 | 2.592765618 | 0.653589645 |
| ENSMUSG000000019797 | 0.221550879  | 5.381302568  | 0.755394447 | 0.384773673 | 0.999071534 | 1700021F05Rik | 1700021F05Rik | C6orf203 | 29.47561409 | 29.88218238 | 46.04703071  | 50.71831989 | 41.79223686 | 35.50793482 | 54.03727006 | 46.83790272 | 40.69856334 | 35.42455876 |
| ENSMUSG000000031333 | 0.220323121  | 5.266990512  | 0.75524603  | 0.384820373 | 0.999071534 | Abcb7         | Abcb7         | ABCB7    | 37.54631794 | 33.02455473 | 44.09474432  | 29.00172054 | 40.876601   | 54.42609682 | 62.06196645 | 26.73490908 | 31.58459935 | 27.58148302 |
| ENSMUSG00000020886  | -0.28029146  | 4.85385311   | 0.755081355 | 0.384872197 | 0.999071534 | Dlg4          | Dlg4          | DLG4     | 21.47509026 | 41.08800077 | 33.79475061  | 25.4632331  | 42.5770676  | 21.90141062 | 13.8490728  | 46.49249046 | 15.3994564  | 27.32004716 |
| ENSMUSG000000019158 | -0.2203435   | 5.166909191  | 0.755063886 | 0.384877695 | 0.999071534 | Tmem160       | Tmem160       | TMEM160  | 57.89852767 | 30.712243   | 40.72873331  | 42.87814185 | 27.40367331 | 38.05461048 | 38.57031491 | 21.69189005 | 27.02761735 | 35.09776394 |
| ENSMUSG000000001785 | 0.187738718  | 5.623752498  | 0.755044804 | 0.384883701 | 0.999071534 | Pwp1          | Pwp1          | PWP1     | 52.28412499 | 38.77568904 | 47.46075534  | 43.08628817 | 57.61965677 | 71.23415613 | 64.71529348 | 42.14029596 | 38.34150369 | 40.65327592 |

|                     |              |              |             |             |             |               |               |          |             |             |             |             |             |             |             |             |             |             |
|---------------------|--------------|--------------|-------------|-------------|-------------|---------------|---------------|----------|-------------|-------------|-------------|-------------|-------------|-------------|-------------|-------------|-------------|-------------|
| ENSMUSG00000062070  | -0.281660842 | 10.94436599  | 0.754984763 | 0.3849026   | 0.999071534 | Pgk1          | Pgk1          | PGK1     | 1987.28801  | 3303.166954 | 1625.783321 | 1724.006584 | 2637.554504 | 1114.134217 | 2025.782832 | 2416.849597 | 918.5461467 | 2074.362815 |
| ENSMUSG00000030067  | 0.304889682  | 7.082032062  | 0.754897454 | 0.384930084 | 0.999071534 | Foxp1         | Foxp1         | FOXP1    | 81.05793874 | 88.22358608 | 194.2861559 | 136.6133678 | 125.4421131 | 112.7085882 | 59.73221588 | 180.3742832 | 181.336456  | 161.959514  |
| ENSMUSG00000074896  | -0.302991373 | 3.801717792  | 0.754881491 | 0.384935109 | 0.999071534 | Ifit3         | Ifit3         | IFIT3    | 14.45708691 | 25.67258923 | 15.5509709  | 11.79495811 | 11.90326621 | 19.20921064 | 6.924536402 | 18.44501479 | 8.01400282  | 8.431306421 |
| ENSMUSG00000006800  | -0.247331443 | 7.036378866  | 0.754864449 | 0.384940474 | 0.999071534 | Sulf2         | Sulf2         | SULF2    | 101.1996084 | 168.7394664 | 117.945026  | 148.8246185 | 202.6825384 | 126.3878746 | 83.54744388 | 177.74915   | 68.27616128 | 127.4499808 |
| ENSMUSG00000015093  | -0.963550714 | -0.712735364 | 0.754792574 | 0.384963103 | 0.999071534 | Clic3         | Clic3         | CLIC3    | 0.210540101 | 1.185800888 | 0.807842644 | 0.624438959 | 0.39241537  | 0.218286485 | 0.064715293 | 1.243484143 | 0           | 0           |
| ENSMUSG00000021598  | 0.211625652  | 6.143163493  | 0.754586861 | 0.385027878 | 0.999071534 | Med10         | Med10         | MED10    | 73.54867515 | 41.85877135 | 77.55289383 | 71.94924449 | 73.97029717 | 59.3739238  | 93.44888378 | 72.53657501 | 63.56204197 | 72.15629681 |
| ENSMUSG00000003824  | 0.232679138  | 3.970518575  | 0.754351969 | 0.38510186  | 0.999071534 | Syce2         | Syce2         | SYCE2    | 14.31672684 | 15.00038123 | 13.39672385 | 16.23541293 | 15.10799173 | 14.84348095 | 19.8028798  | 15.12905707 | 14.14235792 | 16.53581802 |
| ENSMUSG00000021824  | 0.189473328  | 5.378299738  | 0.754328494 | 0.385109255 | 0.999071534 | Ap3m1         | Ap3m1         | AP3M1    | 36.49361744 | 38.12349855 | 44.56598587 | 33.23402904 | 49.24812888 | 53.55295088 | 56.88474297 | 37.37360675 | 28.91326508 | 39.73825042 |
| ENSMUSG00000042857  | 0.481760449  | 1.545135063  | 0.754290404 | 0.385121254 | 0.999071534 | Gm9776        | Gm9776        |          | 3.438821644 | 0.711480533 | 3.702612119 | 1.942698983 | 2.354492217 | 2.910486461 | 1.941458804 | 2.417885834 | 5.421237202 | 2.352922722 |
| ENSMUSG00000055485  | -0.364937868 | 3.254401371  | 0.754157356 | 0.385163171 | 0.999071534 | Soga1         | Soga1         | SOGA1    | 14.45708691 | 18.85423412 | 7.741825339 | 5.966861163 | 8.371527884 | 18.3360647  | 4.46535525  | 8.842553906 | 4.556981996 | 5.686229912 |
| ENSMUSG00000007050  | 0.223886528  | 5.480132244  | 0.752863132 | 0.385571257 | 0.999071534 | Lsm2          | Lsm2          | LSM2     | 40.98513959 | 23.30098745 | 56.34702443 | 47.73488931 | 44.01592395 | 64.90384808 | 52.67824889 | 29.91270189 | 39.3628962  | 47.64668512 |
| ENSMUSG00000033364  | 0.215234852  | 4.331285659  | 0.752777777 | 0.385598195 | 0.999071534 | Usp37         | Usp37         | USP37    | 18.73806896 | 24.66465847 | 15.28169002 | 16.58232347 | 21.05962483 | 31.72430242 | 18.18499747 | 19.75758138 | 16.57798623 | 19.34625349 |
| ENSMUSG00000031505  | 0.207194243  | 5.22472012   | 0.752764989 | 0.385602228 | 0.999071534 | Carkd         | Carkd         | NAXD     | 40.70441945 | 32.43165429 | 32.1117451  | 33.23402904 | 41.39982149 | 32.5246862  | 49.18362304 | 43.31469765 | 36.53442462 | 28.23507267 |
| ENSMUSG00000052364  | 0.289949642  | 3.232315635  | 0.75259884  | 0.385654668 | 0.999071534 | B630019K06Rik | B630019K06Rik |          | 8.140883891 | 7.411255551 | 7.674505119 | 9.297202278 | 10.7260201  | 7.785551283 | 8.412988152 | 10.0169556  | 8.878258026 | 13.39858772 |
| ENSMUSG00000059839  | -0.346934286 | 2.715655013  | 0.752529055 | 0.385676696 | 0.999071534 | Zfp874b       | Zfp874b       |          | 7.789983723 | 8.834216617 | 5.789538949 | 6.868828548 | 8.175320199 | 6.548594537 | 3.753487022 | 10.22420295 | 3.142746204 | 3.92153787  |
| ENSMUSG00000021699  | -0.260338135 | 4.097571134  | 0.752336574 | 0.385737464 | 0.999071534 | Pde4d         | Pde4d         | PDE4D    | 20.70310989 | 30.06005251 | 16.89737531 | 11.03175494 | 18.051107   | 19.06368632 | 15.72581632 | 19.55033403 | 10.44963113 | 10.65351121 |
| ENSMUSG00000078941  | 0.216088736  | 7.166271009  | 0.752305771 | 0.38574719  | 0.999071534 | Taf9          | Ak6           | TAF9     | 128.2891013 | 109.449422  | 157.7985965 | 149.5184396 | 142.4467792 | 144.2873663 | 201.3939933 | 128.7696913 | 132.3096152 | 133.2015697 |
| ENSMUSG00000091460  | -0.440776515 | 1.102174164  | 0.752157097 | 0.385794139 | 0.999071534 | Gm7808        | Gm7808        | UBA52    | 1.473780704 | 3.023792265 | 2.827449254 | 2.01208109  | 2.681505025 | 1.746291877 | 1.553167044 | 0.967154334 | 1.964216377 | 1.895409971 |
| ENSMUSG00000022978  | 0.29138955   | 4.043954922  | 0.75098622  | 0.386164167 | 0.999071534 | Mis18a        | Mis18a        | MIS18A   | 15.65014748 | 10.43504782 | 14.67580803 | 21.30030671 | 13.7999405  | 24.22979979 | 26.72741621 | 8.151729382 | 16.73512354 | 11.89533154 |
| ENSMUSG00000020826  | -0.558626562 | 3.651511392  | 0.750884585 | 0.38619631  | 0.999071534 | Nos2          | Nos2          | NOS2     | 12.21132584 | 42.03664148 | 8.953589305 | 3.260959008 | 11.31464316 | 4.80230266  | 1.68259763  | 28.18564058 | 3.535589479 | 9.607767782 |
| ENSMUSG00000055024  | 0.256186994  | 6.212311894  | 0.750779366 | 0.386229591 | 0.999071534 | Ep300         | Ep300         | EP300    | 45.1959416  | 64.98188867 | 72.30191665 | 81.17706466 | 85.28494032 | 73.99911827 | 36.56414082 | 96.02460883 | 95.38234729 | 76.14319365 |
| ENSMUSG00000022570  | -0.272058969 | 5.234312123  | 0.750312287 | 0.386377377 | 0.999071534 | Tsta3         | Tsta3         | TSTA3    | 59.65302851 | 50.39653775 | 31.775144   | 34.27476064 | 37.86808316 | 55.00819411 | 54.81385358 | 16.09621141 | 14.84947581 | 30.65335435 |
| ENSMUSG00000038628  | 0.209984237  | 5.351757751  | 0.750024638 | 0.38646843  | 0.999071534 | Polr3k        | Polr3k        | POLR3K   | 44.1432411  | 37.53059811 | 34.33331237 | 41.90679236 | 37.86808316 | 47.95026444 | 69.37479461 | 34.40306129 | 27.26323232 | 34.50953326 |
| ENSMUSG00000022325  | 0.362391492  | 3.117030959  | 0.749577505 | 0.386610028 | 0.999071534 | Pop1          | Pop1          | POP1     | 6.667103186 | 4.03172302  | 12.72352164 | 7.701413827 | 7.586697145 | 17.75396741 | 8.865959207 | 3.868617334 | 10.13535651 | 6.797332309 |
| ENSMUSG00000068874  | -0.368749851 | 3.273138173  | 0.749542499 | 0.386621117 | 0.999071534 | Selenbp1      | Selenbp1      | SELENBP1 | 9.404124495 | 15.53399163 | 8.145746661 | 9.85225913  | 12.9497072  | 3.783632399 | 4.724216424 | 16.09621141 | 7.85686551  | 6.209101628 |
| ENSMUSG00000038533  | -0.198052685 | 4.823908249  | 0.749304799 | 0.386696425 | 0.999071534 | Cbfa2t2       | Cbfa2t2       | CBFA2T2  | 30.73885469 | 40.19865011 | 28.4764532  | 22.82671305 | 34.79416277 | 31.50601594 | 22.71506801 | 27.21848624 | 21.99922343 | 23.72530412 |
| ENSMUSG00000011960  | 0.180958083  | 5.838252783  | 0.749140953 | 0.386748347 | 0.999071534 | Ccnt1         | Ccnt1         | CNT1     | 47.02062247 | 73.46036502 | 54.12545715 | 44.5433124  | 59.32012337 | 67.81433454 | 52.28995713 | 62.86503168 | 48.08401692 | 62.4178111  |
| ENSMUSG00000033671  | 0.238801237  | 4.689393734  | 0.74886819  | 0.386834805 | 0.999071534 | Cep350        | Cep350        | CEP350   | 18.80824899 | 25.4947191  | 27.39932968 | 18.0393477  | 32.96289104 | 27.14028625 | 15.8552469  | 36.40645241 | 25.45624425 | 27.71220095 |
| ENSMUSG00000022040  | 0.295855171  | 4.02335164   | 0.748849798 | 0.386840636 | 0.999071534 | Ephx2         | Ephx2         | EPHX2    | 14.73780704 | 9.901437416 | 15.01240914 | 19.91266458 | 15.17339429 | 10.55051342 | 12.42533635 | 14.3691501  | 17.04939816 | 29.2808161  |
| ENSMUSG00000060989  | -1.007989665 | -0.533723228 | 0.748754732 | 0.386870777 | 0.999071534 | Gm11847       | Gm11847       |          | 1.614140771 | 1.778701332 | 0           | 0           | 0.457817931 | 0.873145938 | 0.19414588  | 0.345412262 | 0           | 0.457512752 |
| ENSMUSG00000092560  | -1.045846382 | -1.058480428 | 0.748746176 | 0.386873489 | 0.999071534 | Gm8750        | Gm8750        |          | 0.561440268 | 1.126510844 | 0.269280881 | 0.277528426 | 0.130805123 | 1.018670261 | 0.19414588  | 0           | 0           | 0           |
| ENSMUSG000000037791 | -0.19033531  | 5.190111006  | 0.748694347 | 0.386888923 | 0.999071534 | Phf12         | Phf12         | PHF12    | 37.47613791 | 39.66503971 | 43.0176208  | 40.93544286 | 39.96096514 | 54.20781033 | 27.11570797 | 32.26150527 | 21.84208612 | 33.26771293 |
| ENSMUSG00000027742  | -0.228537333 | 4.492651665  | 0.748673269 | 0.386896607 | 0.999071534 | Cog6          | Cog6          | COG6     | 24.98409194 | 32.78739456 | 17.70521795 | 23.79806255 | 26.29182976 | 27.28581057 | 27.50399973 | 18.7213446  | 10.76390575 | 17.71227938 |
| ENSMUSG00000062683  | 0.440644853  | 2.488914835  | 0.74861681  | 0.386914511 | 0.999071534 | Atp5g2        | Atp5g2        | ATP5G2   | 6.596293153 | 1.185800888 | 13.86796539 | 3.954780073 | 5.624620297 | 6.475832375 | 8.024696391 | 6.977327692 | 10.76390575 | 5.751588876 |
| ENSMUSG00000053870  | -0.230851235 | 4.02661151   | 0.748499615 | 0.386951678 | 0.999071534 | Fpgt          | Fpgt          | FPGT     | 20.07148959 | 16.9569527  | 17.43593707 | 14.08456763 | 22.43307863 | 16.00767553 | 12.36062105 | 18.51409724 | 11.78529826 | 13.0717929  |
| ENSMUSG00000078789  | -0.454628936 | 2.743695519  | 0.748451277 | 0.386967009 | 0.999071534 | Dph1          | Dph1          | DPH1     | 12.7727661  | 6.46261484  | 5.99149961  | 7.493267507 | 6.736463844 | 13.82481069 | 8.218842272 | 4.421276953 | 0.942823861 | 1.633974113 |
| ENSMUSG00000011831  | 0.172506316  | 5.931031526  | 0.748293782 | 0.387016968 | 0.999071534 | Evf5          | Evf5          | EVF5     | 53.40700553 | 66.16768956 | 62.06924316 | 50.57955567 | 65.46796416 | 76.18198311 | 59.73221588 | 60.99980546 | 55.4694705  | 59.67273459 |
| ENSMUSG00000034120  | 0.232231858  | 8.421764404  | 0.748279863 | 0.387021383 | 0.999071534 | Srsf2         | Srsf2         | SRSF2    | 367.1819355 | 222.2190864 | 393.2847272 | 338.0296231 | 313.1474649 | 507.9526496 | 320.1465568 | 266.8655136 | 300.1322625 | 416.4673218 |
| ENSMUSG00000052681  | 0.25284024   | 8.603408618  | 0.74820227  | 0.387046    | 0.999071534 | Rap1b         | Rap1b         | RAP1B    | 467.4692034 | 377.0253924 | 300.7867445 | 356.7627919 | 341.924592  | 419.7649098 | 708.3088871 | 294.4984946 | 301.8607729 | 327.4484122 |

|                     |              |              |             |             |             |               |               |          |             |             |             |             |             |             |             |             |             |             |
|---------------------|--------------|--------------|-------------|-------------|-------------|---------------|---------------|----------|-------------|-------------|-------------|-------------|-------------|-------------|-------------|-------------|-------------|-------------|
| ENSMUSG00000034105  | -0.315638191 | 3.205788622  | 0.748040194 | 0.387097427 | 0.999071534 | Tldc1         | Tldc1         | TLDC1    | 9.544484562 | 13.99245048 | 6.732022034 | 7.909560147 | 14.45396611 | 14.1886215  | 9.189571674 | 5.872008453 | 3.8498641   | 7.712357812 |
| ENSMUSG000000074250 | -0.558234774 | 0.341183697  | 0.747769784 | 0.38718325  | 0.999071534 | Gm10653       | Gm10653       |          | 0.631620302 | 1.48225111  | 2.154247051 | 1.80393477  | 0.850233301 | 0.873145938 | 0.776583522 | 0.898071881 | 0.392843275 | 1.503256184 |
| ENSMUSG000000033423 | -0.188075042 | 5.317284657  | 0.747556532 | 0.387250952 | 0.999071534 | Eri3          | Eri3          | ERI3     | 47.09080251 | 47.78777759 | 47.12415424 | 33.16464693 | 45.38937775 | 54.93543195 | 40.31762784 | 35.23205072 | 22.54920401 | 31.04550814 |
| ENSMUSG00000030022  | -0.218325903 | 4.685118575  | 0.74746863  | 0.387278863 | 0.999071534 | Adamts9       | Adamts9       | ADAMTS9  | 30.31777449 | 33.73603527 | 30.83266092 | 19.0800793  | 29.6273604  | 38.85499425 | 24.07408917 | 15.54355179 | 18.85647722 | 19.73840728 |
| ENSMUSG00000029913  | 0.878388299  | -0.586071478 | 0.747381237 | 0.387306615 | 0.999071534 | Prdm5         | Prdm5         | PRDM5    | 0.140360067 | 0.177870133 | 0.538561763 | 0           | 1.111843547 | 0.654859454 | 1.812028217 | 0.207247357 | 0.549980586 | 0.130717929 |
| ENSMUSG00000042626  | -0.182312624 | 6.733577566  | 0.746980265 | 0.387433984 | 0.999071534 | Shc1          | Shc1          | SHC1     | 114.5338147 | 131.5646085 | 112.2228073 | 111.5664273 | 116.8743776 | 129.1528367 | 83.48272859 | 100.9294629 | 76.52587007 | 95.62016507 |
| ENSMUSG00000025066  | 0.235146427  | 7.51310173   | 0.746937913 | 0.387447441 | 0.999071534 | Sfr1          | Sfr1          | SFR1     | 130.2541423 | 156.7628774 | 218.8580363 | 182.8218508 | 179.3338239 | 154.6195932 | 172.5309724 | 210.2869851 | 206.4784256 | 185.6848182 |
| ENSMUSG00000026798  | 0.328213232  | 3.095598741  | 0.746780332 | 0.387497515 | 0.999071534 | Coq4          | Coq4          | COQ4     | 7.579443623 | 9.486407105 | 6.395420932 | 6.313771696 | 9.090956062 | 10.25946477 | 13.59021163 | 5.802926001 | 10.52819978 | 4.575127515 |
| ENSMUSG00000024456  | -0.191148047 | 6.345304239  | 0.746739165 | 0.387510598 | 0.999071534 | Diap1         | Diaph1        | DIAPH1   | 97.62042666 | 117.3942879 | 84.41955631 | 68.68828548 | 82.73424042 | 105.7234207 | 58.63205589 | 79.2375729  | 59.63360922 | 67.45045137 |
| ENSMUSG000000025142 | -0.20070351  | 5.314570891  | 0.74660138  | 0.387554392 | 0.999071534 | Aspscr1       | Aspscr1       | ASPSCR1  | 60.49518891 | 37.05627775 | 37.83396383 | 41.07420708 | 44.21213164 | 44.38491853 | 28.15115266 | 31.22526848 | 26.71334273 | 49.47673613 |
| ENSMUSG000000097722 | 0.829016815  | 0.395676004  | 0.746575209 | 0.387562711 | 0.999071534 | Gm26841       | Gm26841       |          | 0.701800335 | 0.059290044 | 1.481044848 | 2.150845303 | 0           | 0.436572969 | 0.388291761 | 0.967154334 | 2.985608894 | 2.091486864 |
| ENSMUSG000000032068 | -0.43101134  | 1.672513504  | 0.746301388 | 0.387649766 | 0.999071534 | 1600029D21Rik | Plet1         | PLET1    | 5.684582717 | 3.320242487 | 3.029409915 | 4.162926393 | 1.962076848 | 5.602686437 | 1.876743511 | 1.519813953 | 2.278490998 | 1.764692042 |
| ENSMUSG000000021360 | -0.252606728 | 4.734353767  | 0.746151635 | 0.387697388 | 0.999071534 | Gcnt2         | Gcnt2         | GCNT2    | 31.72137516 | 38.65710895 | 31.50586312 | 27.68346051 | 19.88237873 | 26.70371328 | 30.67504911 | 28.11655812 | 8.249708785 | 25.75143201 |
| ENSMUSG000000032314 | 0.193914194  | 6.558636787  | 0.746009679 | 0.387742538 | 0.999071534 | Etfa          | Etfa          | ETFA     | 99.65564763 | 77.84782831 | 87.51628644 | 101.3672577 | 88.48966584 | 103.7588423 | 122.5060506 | 100.3077209 | 83.75418633 | 73.39811714 |
| ENSMUSG000000022489 | 0.385144827  | 3.583251625  | 0.745561355 | 0.387885181 | 0.999071534 | Pde1b         | Pde1b         | PDE1B    | 9.895384729 | 11.91729893 | 13.53136429 | 9.019673851 | 9.0255535   | 6.112021568 | 3.882917609 | 23.69528117 | 8.406846095 | 21.37238139 |
| ENSMUSG000000028894 | -0.264224957 | 4.055303776  | 0.745456962 | 0.387918406 | 0.999071534 | Inpp5b        | Inpp5b        | INPP5B   | 25.05427197 | 24.19033812 | 12.85816209 | 10.47669809 | 21.71365045 | 24.0115133  | 16.24353866 | 13.95465538 | 8.642552061 | 11.82997258 |
| ENSMUSG000000049800 | -0.207550192 | 5.758471247  | 0.745410389 | 0.38793323  | 0.999071534 | Sertad2       | Sertad2       | SERTAD2  | 50.52962415 | 73.93468538 | 48.67251931 | 47.04106824 | 81.62239687 | 57.77315625 | 34.88154319 | 65.83557713 | 41.24854393 | 42.15653211 |
| ENSMUSG000000024947 | -0.192906269 | 5.057780883  | 0.745407977 | 0.387933998 | 0.999071534 | Men1          | Men1          | MEN1     | 33.61623607 | 31.42372354 | 36.4202392  | 37.39695543 | 44.80075469 | 45.18530231 | 24.59181152 | 31.91609301 | 24.90626367 | 25.03248341 |
| ENSMUSG000000022707 | -0.287552013 | 5.234562858  | 0.745373481 | 0.387944979 | 0.999071534 | Gbe1          | Gbe1          | GBE1     | 29.19489395 | 87.74926572 | 26.59148704 | 32.05453323 | 39.30693952 | 32.67021052 | 22.26206096 | 52.91715853 | 21.29210553 | 34.05202051 |
| ENSMUSG000000058881 | -0.208015828 | 4.950610158  | 0.74533792  | 0.387956299 | 0.999071534 | Zfp516        | Zfp516        | ZNF516   | 34.59875654 | 38.41994878 | 29.41893629 | 33.44217536 | 35.51359095 | 37.32698886 | 15.72581632 | 29.63637208 | 23.88487115 | 32.28732847 |
| ENSMUSG000000055553 | -0.2048691   | 4.686008488  | 0.744545943 | 0.388208531 | 0.999071534 | Kxd1          | Kxd1          | KXD1     | 23.15941107 | 29.88218238 | 26.12024549 | 31.63824059 | 31.19702188 | 21.10102684 | 23.03864448 | 27.08032134 | 19.72073243 | 22.87563758 |
| ENSMUSG000000002017 | 0.230446615  | 5.23662015   | 0.744434346 | 0.388244091 | 0.999071534 | Fam98a        | Fam98a        | FAM98A   | 37.05505771 | 35.04041624 | 44.09474432 | 26.5039647  | 37.41026523 | 74.07188043 | 48.14817835 | 22.10638477 | 29.93465759 | 28.69258542 |
| ENSMUSG000000027111 | 0.202276065  | 6.864187081  | 0.744059467 | 0.388363581 | 0.999071534 | Itga6         | Itga6         | ITGA6    | 92.28674411 | 118.2836386 | 97.14307795 | 115.1049148 | 138.9150408 | 139.7761123 | 147.2272927 | 112.6734799 | 110.3103918 | 90.45680687 |
| ENSMUSG000000018669 | -0.18476066  | 5.748091427  | 0.743863877 | 0.388425945 | 0.999071534 | Cdk5rap3      | Cdk5rap3      | CDK5RAP3 | 71.23273404 | 58.63785392 | 52.44245165 | 52.86916519 | 61.67461558 | 63.95793998 | 41.61193371 | 46.49249046 | 30.0917949  | 64.6400159  |
| ENSMUSG000000000632 | 0.790767215  | 0.346625843  | 0.743735146 | 0.388466999 | 0.999071534 | Sez6          | Sez6          | SEZ6     | 0.912340436 | 0.296450222 | 0.807842644 | 2.081463196 | 0.261610246 | 0.218286485 | 0.19414588  | 0.345412262 | 4.00700141  | 1.568615148 |
| ENSMUSG000000051037 | 0.43601414   | 1.007360393  | 0.743621576 | 0.388503222 | 0.999071534 | Zfp455        | Zfp455        |          | 1.824680872 | 1.007930755 | 1.817645949 | 1.318260024 | 2.354492217 | 2.473913492 | 2.588611739 | 2.210638477 | 1.649941757 | 1.568615148 |
| ENSMUSG000000004947 | -0.203811839 | 4.482708531  | 0.743555656 | 0.38852425  | 0.999071534 | Dtx2          | Dtx2          | DTX2     | 22.31725067 | 27.92561092 | 25.04312197 | 23.24300569 | 24.98377853 | 25.10294573 | 16.8906916  | 24.6624355  | 15.08518178 | 18.75802281 |
| ENSMUSG000000027752 | 0.221048476  | 6.197641618  | 0.743139416 | 0.388657063 | 0.999071534 | Exosc8        | Exosc8        | EXOSC8   | 80.84739864 | 42.51096184 | 95.86399377 | 62.513278   | 69.6537281  | 88.40602625 | 102.2501637 | 51.25917968 | 70.55465228 | 68.43083584 |
| ENSMUSG000000028517 | -0.218733959 | 6.805713555  | 0.743096061 | 0.388670901 | 0.999071534 | Ppap2b        | Plpp3         | PLPP3    | 97.83096676 | 148.8180115 | 130.1299859 | 120.7942475 | 125.8999311 | 80.62047497 | 77.72306747 | 135.4016067 | 95.46091594 | 99.41098501 |
| ENSMUSG000000097214 | 0.62737568   | -0.021420206 | 0.742889255 | 0.388736916 | 0.999071534 | Gm19791       | Gm19791       |          | 0.631620302 | 0.415030311 | 0.269280881 | 1.110113705 | 1.046440986 | 0.582097292 | 0.647152935 | 1.865226215 | 0.785686551 | 1.045743432 |
| ENSMUSG000000025489 | 0.678707628  | 0.230551751  | 0.742745151 | 0.388782925 | 0.999071534 | Ifitm5        | Ifitm5        | IFITM5   | 1.052700503 | 0.711480533 | 0.538561763 | 1.595788451 | 0.261610246 | 0.582097292 | 0.19414588  | 1.105319238 | 2.357059653 | 1.633974113 |
| ENSMUSG000000097537 | 0.506314362  | 0.792602782  | 0.742535324 | 0.388849932 | 0.999071534 | 2610020C07Rik | 2610020C07Rik |          | 1.473780704 | 0.652190488 | 2.423527932 | 0.901967385 | 1.438856355 | 0.9459081   | 2.135604685 | 2.694215643 | 1.257098482 | 1.895409971 |
| ENSMUSG000000073771 | -0.242933787 | 3.797334155  | 0.742529719 | 0.388851722 | 0.999071534 | Btbd19        | Btbd19        | BTBD19   | 16.21158775 | 11.6208487  | 16.08953266 | 16.02726661 | 17.46248395 | 14.69795663 | 10.03087049 | 10.29328541 | 12.09957289 | 13.59466462 |
| ENSMUSG000000091786 | 0.407249515  | 1.809446294  | 0.742043832 | 0.389006951 | 0.999071534 | Gm8425        | Gm8425        |          | 2.315941107 | 2.608761954 | 4.847055865 | 1.873316877 | 3.466335765 | 2.110102684 | 4.077063489 | 4.144947144 | 4.085570065 | 3.594743048 |
| ENSMUSG000000042622 | -0.300450527 | 5.837029925  | 0.742032874 | 0.389010453 | 0.999071534 | Maff          | Maff          | MAFF     | 49.19620351 | 118.6986689 | 55.606502   | 44.12701977 | 60.6281746  | 30.12353487 | 41.09421136 | 95.26470185 | 23.25632191 | 55.29368397 |
| ENSMUSG000000034652 | -0.311505522 | 3.744432238  | 0.742014572 | 0.389016302 | 0.999071534 | Cd300a        | Cd300a        | CD300C   | 17.19410822 | 21.87802639 | 12.05031944 | 11.30928337 | 14.19235587 | 19.2819728  | 20.45003274 | 6.770080335 | 6.285492408 | 6.601255415 |
| ENSMUSG000000022673 | 0.249548232  | 6.494225701  | 0.741940206 | 0.389040069 | 0.999071534 | Mcm4          | Mcm4          | MCM4     | 91.72530384 | 59.4086245  | 102.3267349 | 79.09560147 | 94.70290919 | 194.4932577 | 113.8342012 | 46.00891329 | 61.04784501 | 79.93401359 |
| ENSMUSG000000083982 | 0.52911238   | 0.343991186  | 0.741884684 | 0.389057815 | 0.999071534 | Gm14650       | Gm14650       |          | 0.98252047  | 1.48225111  | 0.471241542 | 0.971349492 | 0.915635862 | 1.309718907 | 1.423736457 | 0.759906976 | 1.099961171 | 1.895409971 |
| ENSMUSG000000013858 | 0.248063576  | 7.447223934  | 0.741822161 | 0.389077799 | 0.999071534 | Tmem259       | Tmem259       | TMEM259  | 156.852375  | 133.8176302 | 179.6103479 | 179.1445991 | 176.3907086 | 147.5616636 | 109.6277072 | 197.8521437 | 213.6281732 | 218.6257363 |

|                     |              |             |             |             |             |               |               |           |             |             |             |             |             |             |             |             |             |             |
|---------------------|--------------|-------------|-------------|-------------|-------------|---------------|---------------|-----------|-------------|-------------|-------------|-------------|-------------|-------------|-------------|-------------|-------------|-------------|
| ENSMUSG00000026039  | 0.213801843  | 4.721263509 | 0.741400361 | 0.389212661 | 0.999071534 | Sgol2         | Sgol2a        | SGO2      | 23.93139144 | 17.43127306 | 26.52416681 | 22.2716562  | 36.36382425 | 40.38299964 | 28.02172208 | 21.83005496 | 21.68494881 | 26.53573959 |
| ENSMUSG00000063754  | -0.457173404 | 1.535409375 | 0.74062938  | 0.38945934  | 0.999071534 | Gm10136       | Gm10136       |           | 3.438821644 | 2.668051998 | 4.712415424 | 3.330341114 | 2.419894779 | 0.873145938 | 1.229590576 | 3.592287524 | 2.749902928 | 2.287563758 |
| ENSMUSG00000002778  | -0.191087343 | 6.782400141 | 0.740545773 | 0.389486104 | 0.999071534 | Kdelr1        | Kdelr1        | KDELR1    | 99.72582766 | 133.8769203 | 108.452875  | 129.6751571 | 135.9719256 | 110.9622963 | 121.0823141 | 96.99176316 | 74.56165369 | 94.70513957 |
| ENSMUSG000000025413 | 0.205103968  | 4.695375677 | 0.740310833 | 0.389561325 | 0.999071534 | Ttc4          | Ttc4          | TTC4      | 35.79181711 | 22.53021687 | 23.56207712 | 18.66378666 | 24.39515548 | 32.59744836 | 32.22821615 | 24.6624355  | 19.17075184 | 26.07822684 |
| ENSMUSG00000037348  | -0.300644177 | 2.89269647  | 0.740286795 | 0.389569023 | 0.999071534 | Paqr7         | Paqr7         | PAQR7     | 8.070703857 | 9.782857327 | 7.741825339 | 6.591300122 | 9.744981678 | 8.440410737 | 5.953807    | 5.941090906 | 3.457020824 | 8.431306421 |
| ENSMUSG00000032089  | -0.366511395 | 4.255821589 | 0.740234943 | 0.389585628 | 0.999071534 | Il10ra        | Il10ra        | IL10RA    | 42.66946039 | 28.39993127 | 10.56927459 | 12.48877918 | 17.92030188 | 38.49118345 | 21.35604685 | 8.773471454 | 5.342668547 | 12.1567674  |
| ENSMUSG00000040964  | -0.264035464 | 3.767579749 | 0.74009827  | 0.389628902 | 0.999071534 | Arhgef10l     | Arhgef10l     | ARHGEF10L | 20.77328993 | 14.94109119 | 10.63659481 | 14.01518552 | 16.28523784 | 21.90141062 | 11.51932224 | 8.980718811 | 6.992610304 | 12.1567674  |
| ENSMUSG00000032469  | 0.245877701  | 4.45700823  | 0.739761711 | 0.389737221 | 0.999071534 | Dbr1          | Dbr1          | DBR1      | 18.24680872 | 14.40748079 | 26.52416681 | 22.82671305 | 21.32123508 | 28.7410538  | 25.7566868  | 17.61602536 | 27.10618601 | 14.05217737 |
| ENSMUSG00000036009  | 0.292767351  | 3.070802039 | 0.739730827 | 0.389747117 | 0.999071534 | Mettl25       | Mettl25       | METTL25   | 7.439083555 | 7.707705773 | 6.664701814 | 9.921641237 | 6.671061283 | 12.51509178 | 10.9368846  | 8.013564478 | 4.871256616 | 8.758101244 |
| ENSMUSG00000055320  | -0.234850959 | 6.934140286 | 0.738976966 | 0.38988879  | 0.999071534 | Tead1         | Tead1         | TEAD1     | 91.65512381 | 158.5415787 | 142.1129851 | 153.1263092 | 137.8031973 | 160.5133283 | 55.91401357 | 128.9078562 | 87.21120716 | 116.6003927 |
| ENSMUSG00000070934  | 0.18275646   | 5.946859263 | 0.73890359  | 0.390012324 | 0.999071534 | Rraga         | Rraga         | RRAGA     | 57.7581676  | 69.07290173 | 58.97251302 | 51.20399463 | 62.91726426 | 63.52136701 | 80.69997097 | 51.39734458 | 49.89109599 | 70.58768167 |
| ENSMUSG00000063888  | 0.229434273  | 6.660784306 | 0.738845241 | 0.390031104 | 0.999071534 | Rpl7l1        | Rpl7l1        | RPL7L1    | 118.5340767 | 92.90749959 | 85.90060116 | 78.26301619 | 109.353083  | 139.1212528 | 181.3969676 | 68.59887523 | 63.95488525 | 85.75096143 |
| ENSMUSG00000027195  | 0.219486834  | 6.692901532 | 0.738656205 | 0.390091684 | 0.999071534 | Hsd17b12      | Hsd17b12      | HSO17B12  | 107.1649112 | 104.5876383 | 82.87119124 | 94.63719333 | 107.0639933 | 131.3357015 | 178.7436406 | 78.47766592 | 77.94010586 | 77.18893708 |
| ENSMUSG00000082345  | 0.609202644  | 0.351882678 | 0.737919271 | 0.390328226 | 0.999071534 | Gm13622       | Gm13622       |           | 1.543960738 | 0.770770577 | 1.077123525 | 0.901967385 | 0.39241537  | 1.091432423 | 1.48845175  | 0.345412262 | 0.549980586 | 3.267948225 |
| ENSMUSG00000032373  | -0.329808436 | 3.119407534 | 0.737414246 | 0.390490448 | 0.999071534 | Car12         | Car12         | CA12      | 13.33420637 | 15.83044186 | 7.068623136 | 5.550568524 | 8.044515076 | 6.403070214 | 6.018522294 | 9.464295978 | 4.871256616 | 9.738485711 |
| ENSMUSG00000034675  | -0.199930121 | 6.896292646 | 0.737299456 | 0.390527334 | 0.999071534 | Dbn1          | Dbn1          | DBN1      | 131.5173829 | 138.4422537 | 133.5633172 | 109.2074357 | 149.5756584 | 151.0542473 | 83.87102035 | 134.7107822 | 69.45469111 | 105.6200866 |
| ENSMUSG00000018076  | -0.235577206 | 5.473429433 | 0.737203343 | 0.390558223 | 0.999071534 | Med13l        | Med13l        | MED13L    | 33.54605603 | 59.4086245  | 57.62610861 | 43.64134502 | 54.54573637 | 47.00435634 | 20.77360921 | 60.30898094 | 29.69895163 | 39.2153787  |
| ENSMUSG00000032035  | -0.21228342  | 5.867628082 | 0.73715421  | 0.390574014 | 0.999071534 | Ets1          | Ets1          | ETS1      | 66.81139193 | 82.82819204 | 66.98361924 | 50.51017357 | 58.46989007 | 103.1039829 | 46.59501131 | 47.18331499 | 26.87048004 | 49.60745406 |
| ENSMUSG00000026319  | 0.198377336  | 5.085804496 | 0.736551172 | 0.390767905 | 0.999071534 | 2310035C23Rik | 2310035C23Rik | KIAA1468  | 33.0547958  | 26.14690958 | 39.85357044 | 31.56885848 | 32.76668336 | 37.9098615  | 28.86302089 | 31.6397632  | 38.97005293 | 34.70561015 |
| ENSMUSG00000015377  | 0.332106036  | 4.018282407 | 0.73600647  | 0.390945033 | 0.999071534 | Dennd6b       | Dennd6b       | DENND6B   | 16.84320805 | 10.25717768 | 16.49345398 | 15.8885024  | 14.25775843 | 12.87890259 | 5.889091707 | 12.98750105 | 20.74212495 | 31.37230296 |
| ENSMUSG00000003528  | -0.185981685 | 5.851918702 | 0.735686272 | 0.391046233 | 0.999071534 | Slc25a1       | Slc25a1       | SLC25A1   | 65.40779126 | 80.04155995 | 49.81696305 | 50.44079146 | 74.10110229 | 70.14272371 | 56.30230533 | 58.37467227 | 32.3702859  | 48.03883891 |
| ENSMUSG00000057230  | -0.221720439 | 5.557405732 | 0.735615342 | 0.391069071 | 0.999071534 | Aak1          | Aak1          | AAK1      | 39.30081878 | 62.66957694 | 63.95420932 | 41.76802814 | 55.19976199 | 57.84591841 | 23.16807507 | 57.7529302  | 29.14897104 | 44.31337793 |
| ENSMUSG00000061897  | 1.108121624  | 0.949891549 | 0.735577184 | 0.391081358 | 0.999071534 | Gm14292       | Gm14292       |           | 0           | 0.491013064 | 1.144443746 | 0           | 0.654025616 | 4.80230266  | 7.377543457 | 0.552659619 | 0           | 0           |
| ENSMUSG00000036840  | 0.209589862  | 4.594519641 | 0.735146503 | 0.391220076 | 0.999071534 | Siah1a        | Siah1a        | SIAH1     | 21.61545033 | 22.70808701 | 22.14835249 | 22.06350988 | 27.20746562 | 20.8099782  | 26.66270091 | 28.11655812 | 23.25632191 | 23.65994515 |
| ENSMUSG00000039087  | -0.236091415 | 4.4166087   | 0.734821508 | 0.3913248   | 0.999071534 | Rreb1         | Rreb1         | RREB1     | 19.93112953 | 29.6450222  | 20.46534698 | 26.15705417 | 22.69468887 | 29.54143758 | 10.74273872 | 22.86629174 | 13.1209654  | 19.86912521 |
| ENSMUSG00000019261  | -0.195569775 | 5.577800612 | 0.734339091 | 0.391480326 | 0.999071534 | Map1s         | Map1s         | MAP1S     | 51.37178455 | 46.18694459 | 56.61630531 | 44.68207662 | 65.79497697 | 66.72290212 | 27.89229149 | 36.82094713 | 37.7915231  | 48.36563373 |
| ENSMUSG00000083378  | 0.547015453  | 0.086691762 | 0.734253521 | 0.391507922 | 0.999071534 | Gm13196       | Gm13196       |           | 0.912340436 | 1.067220799 | 0.673202203 | 0.555056852 | 0.719428178 | 0.800383777 | 1.100159989 | 1.105319238 | 0.785686551 | 1.503256184 |
| ENSMUSG00000027533  | 0.210822232  | 6.913366286 | 0.73399011  | 0.391592888 | 0.999071534 | Fabp5         | Fabp5         | FABP5     | 104.3577099 | 118.1057685 | 137.1312888 | 100.7428187 | 119.6212852 | 95.6822424  | 125.4182388 | 164.1399069 | 105.9105471 | 122.8748533 |
| ENSMUSG00000022560  | -0.279006893 | 3.754959222 | 0.733925852 | 0.391613619 | 0.999071534 | Slc52a2       | Slc52a2       | SLC52A2   | 17.96608859 | 14.58535092 | 16.5607742  | 14.8477708  | 12.0994739  | 21.68312413 | 16.56711513 | 8.013564478 | 5.421237202 | 9.411690889 |
| ENSMUSG00000035401  | 0.260214006  | 5.451129162 | 0.733642029 | 0.391705207 | 0.999071534 | 2210018M11Rik | Emsy          | EMSY      | 31.15993489 | 35.81118682 | 54.73133914 | 45.72280822 | 37.67187548 | 29.54143758 | 26.40383974 | 49.0485412  | 59.79074653 | 55.16296604 |
| ENSMUSG00000042133  | 0.265363573  | 7.002712589 | 0.733398855 | 0.391783701 | 0.999071534 | Ppig          | Ppig          | PPIG      | 68.35535267 | 96.28703212 | 176.3789773 | 131.0627993 | 129.2354617 | 113.6544963 | 85.61833327 | 131.1875771 | 163.108528  | 161.959514  |
| ENSMUSG00000073435  | -0.371419275 | 2.616866253 | 0.733059869 | 0.39189316  | 0.999071534 | Nme3          | Nme3          | NME3      | 8.632144126 | 4.268883197 | 5.789538949 | 10.12978756 | 6.082438228 | 5.74821076  | 8.089411685 | 2.141556024 | 2.907040239 | 6.797323209 |
| ENSMUSG00000014355  | 0.187769845  | 6.322722496 | 0.733034839 | 0.391901244 | 0.999071534 | Anapc1        | Anapc1        | ANAPC1    | 82.74225955 | 92.43317923 | 65.09865307 | 64.03968434 | 84.95792751 | 129.4438853 | 86.3302015  | 80.48105704 | 51.38390043 | 74.90137332 |
| ENSMUSG00000026749  | 0.172917832  | 5.558710977 | 0.732952781 | 0.391927749 | 0.999071534 | Nek6          | Nek6          | NEK6      | 46.31882214 | 45.35688397 | 51.70192922 | 35.73178487 | 51.01399804 | 54.57162114 | 54.87856887 | 49.94661308 | 34.96305152 | 47.71204409 |
| ENSMUSG00000029669  | 0.443899279  | 1.481195629 | 0.732753467 | 0.391992136 | 0.999071534 | Tspan12       | Tspan12       | TSPAN12   | 2.596661241 | 3.379532531 | 1.95228639  | 0.624438959 | 3.27012808  | 4.438491853 | 4.400639957 | 2.141556024 | 2.121353688 | 2.0261279   |
| ENSMUSG00000021951  | -0.26876887  | 5.139887775 | 0.732672349 | 0.392018345 | 0.999071534 | N6amt2        | Eef1akmt1     | EEF1AKMT1 | 62.81113002 | 27.09555029 | 33.45814951 | 39.33965441 | 36.88704474 | 34.85307537 | 57.46718061 | 15.33630443 | 19.72073243 | 28.82330335 |
| ENSMUSG00000030091  | -0.479479393 | 1.891777333 | 0.732648177 | 0.392026156 | 0.999071534 | Nup210        | Nup210        | NUP210    | 7.088183388 | 6.640484974 | 3.231370576 | 1.942698983 | 2.87771271  | 7.712789121 | 2.78275762  | 0.828989429 | 1.099961171 | 3.137230296 |
| ENSMUSG00000061665  | 0.172733768  | 5.846671462 | 0.732394519 | 0.392108131 | 0.999071534 | Cd2ap         | Cd2ap         | CD2AP     | 47.72242281 | 49.62576717 | 66.98361924 | 56.40765262 | 59.05851312 | 73.92635611 | 54.42556182 | 57.13118813 | 49.81252733 | 59.99952942 |
| ENSMUSG00000038784  | 0.269297067  | 4.408273286 | 0.732388504 | 0.392110075 | 0.999071534 | Cnot4         | Cnot4         | CNOT4     | 12.70258607 | 14.11103057 | 24.97580175 | 23.52053412 | 23.54492217 | 22.19245926 | 11.97232929 | 24.04069343 | 27.73473525 | 22.61420172 |

|                    |              |              |             |             |             |               |               |           |             |              |             |             |             |             |             |             |             |             |
|--------------------|--------------|--------------|-------------|-------------|-------------|---------------|---------------|-----------|-------------|--------------|-------------|-------------|-------------|-------------|-------------|-------------|-------------|-------------|
| ENSMUSG00000090125 | -0.582352063 | 0.782194654  | 0.732373226 | 0.392115014 | 0.999071534 | Pou3f1        | Pou3f1        | POU3F1    | 0.98252047  | 0.474320355  | 3.971893    | 2.844666369 | 1.504258917 | 1.964578361 | 0.388291761 | 0.759906976 | 1.807079067 | 1.176461361 |
| ENSMUSG00000064080 | -0.25135909  | 9.393804991  | 0.731916817 | 0.392262578 | 0.999071534 | Fbln2         | Fbln2         | FBLN2     | 639.7611858 | 1196.354516  | 729.8185087 | 523.9042866 | 577.5700215 | 878.4575761 | 530.6654065 | 678.8041772 | 335.2524513 | 511.1071024 |
| ENSMUSG00000032252 | 0.242899183  | 4.936492967  | 0.731824677 | 0.392292378 | 0.999071534 | Glce          | Glce          | GLCE      | 31.93191526 | 42.68883197  | 16.89737531 | 28.44666369 | 25.17998621 | 41.54719423 | 50.73679009 | 26.73490908 | 17.99222202 | 26.20894477 |
| ENSMUSG00000029674 | -0.22300139  | 4.216213253  | 0.731697431 | 0.392333538 | 0.999071534 | Limk1         | Limk1         | LIMK1     | 19.51004932 | 24.78323856  | 18.31109993 | 18.94131509 | 21.77905301 | 28.59552948 | 13.39606575 | 14.71456236 | 11.31388633 | 16.73189491 |
| ENSMUSG00000078451 | 1.096768782  | -0.560714998 | 0.731592003 | 0.392367645 | 0.999071534 | Ppil6         | Ppil6         | PPIL6     | 0.350900168 | 0            | 0.471241542 | 0.485674746 | 0.588623054 | 0           | 0.064715293 | 1.036236786 | 2.199922343 | 0           |
| ENSMUSG00000039182 | 0.360807608  | 3.063508071  | 0.731381583 | 0.39243573  | 0.999071534 | AW209491      | AW209491      | C7orf25   | 10.17610486 | 8.004155995  | 4.779735644 | 4.093544286 | 10.7260201  | 7.712789121 | 17.73199041 | 9.326131073 | 4.399844685 | 5.882306805 |
| ENSMUSG00000007783 | 0.604493647  | 0.300547577  | 0.731343161 | 0.392448164 | 0.999071534 | Cpt1c         | Cpt1c         | CPT1C     | 2.035220973 | 0.889350666  | 0.403921322 | 0.277528426 | 0.981038424 | 1.528005392 | 2.459181152 | 0.483577167 | 1.021392516 | 0.980384468 |
| ENSMUSG00000032878 | -0.587864192 | 1.712526422  | 0.730583864 | 0.392694001 | 0.999071534 | Ccdc85a       | Ccdc85a       | CCDC85A   | 2.596661241 | 0.948640711  | 3.500651458 | 10.6154623  | 1.373453794 | 4.29296753  | 0.906014109 | 0.483577167 | 2.828471584 | 3.790819941 |
| ENSMUSG00000020196 | 0.195411984  | 5.489064796  | 0.730038613 | 0.392870673 | 0.999071534 | Cabin1        | Cabin1        | CABIN1    | 44.49414127 | 42.27380166  | 43.75814322 | 30.7362732  | 56.63861834 | 62.64822107 | 30.93391028 | 48.49588158 | 40.46285738 | 49.80353095 |
| ENSMUSG00000058638 | 0.213428895  | 4.338376317  | 0.729986945 | 0.39288742  | 0.999071534 | Zfp110        | Zfp110        | ZNF274    | 14.24654681 | 19.50642461  | 17.77253817 | 21.1615425  | 23.74112986 | 23.64770249 | 21.55019273 | 20.03391119 | 19.95643839 | 18.56194592 |
| ENSMUSG00000030613 | 0.207494791  | 5.428002838  | 0.729490535 | 0.393048376 | 0.999071534 | Ccdc90b       | Ccdc90b       | CCDC90B   | 39.09027868 | 36.99698771  | 40.39213221 | 48.15118194 | 41.46522405 | 31.36049162 | 57.85547237 | 39.44608032 | 41.95566182 | 47.25453134 |
| ENSMUSG00000042992 | -0.483958336 | 1.786928522  | 0.729381166 | 0.39308385  | 0.999071534 | Loh12cr1      | Borcs5        | BORCS5    | 7.088183388 | 3.438822576  | 2.086926831 | 2.705902155 | 4.90519212  | 5.23887563  | 2.459181152 | 3.592287524 | 0.235705965 | 2.61435858  |
| ENSMUSG00000028944 | 0.273825824  | 4.346810345  | 0.72882327  | 0.393264879 | 0.999071534 | Prkag2        | Prkag2        | PRKAG2    | 24.56301174 | 15.23754141  | 15.34901024 | 17.41490874 | 22.76009144 | 32.59744836 | 37.92316198 | 17.54694291 | 9.899650542 | 12.74499808 |
| ENSMUSG00000005823 | -0.193148357 | 5.500122448  | 0.728799218 | 0.393272686 | 0.999071534 | Gpr108        | Gpr108        | GPR108    | 55.51240653 | 62.55099685  | 33.25618885 | 43.91887345 | 55.52677479 | 47.14988067 | 44.32997603 | 44.55818179 | 25.53481291 | 44.11730104 |
| ENSMUSG00000027737 | -0.377297494 | 2.563696781  | 0.728740534 | 0.393291735 | 0.999071534 | Slc7a11       | Slc7a11       | SLC7A11   | 11.15862533 | 9.723567283  | 6.395420932 | 3.330341114 | 3.531738326 | 6.548594537 | 6.406814054 | 2.348803381 | 4.085570065 | 5.163358196 |
| ENSMUSG00000029513 | 0.189738168  | 4.796579518  | 0.728267694 | 0.393445273 | 0.999071534 | Prkab1        | Prkab1        | PRKAB1    | 27.51057315 | 26.324777972 | 27.93789144 | 24.42250151 | 28.05769892 | 33.97992943 | 23.8155228  | 31.08710358 | 27.10618601 | 25.88214994 |
| ENSMUSG00000030779 | 0.238445202  | 6.246262873  | 0.728043695 | 0.393518039 | 0.999071534 | Rbbp6         | Rbbp6         | RBBP6     | 57.47744747 | 52.94600966  | 90.29009526 | 86.38072265 | 72.00822032 | 79.74732903 | 40.51177372 | 83.10619023 | 88.46830564 | 96.6659085  |
| ENSMUSG00000021189 | 0.201179345  | 4.612087011  | 0.728018332 | 0.393526279 | 0.999071534 | Atxn3         | Atxn3         | ATXN3     | 25.54553221 | 25.85045936  | 18.44574037 | 22.2716562  | 25.50699902 | 29.54143758 | 21.8737692  | 22.10638477 | 24.90626367 | 26.66645752 |
| ENSMUSG00000022338 | 0.243760718  | 7.25344718   | 0.727773299 | 0.393605902 | 0.999071534 | Eny2          | Eny2          | ENY2      | 131.3068428 | 92.55175932  | 191.1894258 | 179.2139812 | 125.7691259 | 129.298361  | 172.660403  | 136.0233488 | 177.7222978 | 163.2013344 |
| ENSMUSG00000027452 | -0.661949036 | 1.374573119  | 0.727633476 | 0.393651348 | 0.999071534 | Acss1         | Acss1         | ACSS1     | 3.438821644 | 5.039653775  | 2.490848153 | 2.636520049 | 1.962076848 | 6.403070214 | 3.041618794 | 0.552659619 | 0           | 0.326794823 |
| ENSMUSG00000090564 | 0.526313028  | 0.51467337   | 0.727615595 | 0.393657161 | 0.999071534 | A430057M04Rik | A430057M04Rik |           | 0.842160403 | 0.592900444  | 1.683005509 | 1.526406344 | 0.850233301 | 0.727621615 | 1.617882337 | 1.312566595 | 1.807079067 | 1.699333077 |
| ENSMUSG00000058833 | -0.221663883 | 6.537012057  | 0.727495115 | 0.393696326 | 0.999071534 | 2810428I15Rik | 2810428I15Rik | C19orf60  | 110.1826527 | 65.75265925  | 119.5607113 | 130.230214  | 89.53610682 | 84.98620466 | 66.00959935 | 64.93750525 | 83.67561768 | 109.3455476 |
| ENSMUSG00000030559 | 0.947087154  | -0.775829538 | 0.727031523 | 0.393847083 | 0.999071534 | Rab38         | Rab38         | RAB38     | 1.122880537 | 0.177870133  | 0.134640441 | 0           | 0.196207685 | 0.436572969 | 1.423736457 | 0           | 0.549980586 | 0.457512752 |
| ENSMUSG00000048621 | -0.31419503  | 2.641369458  | 0.726718337 | 0.393948976 | 0.999071534 | Gm6377        | Gm6377        |           | 8.421604025 | 7.470545595  | 8.213066882 | 6.244389589 | 4.774386997 | 5.166113468 | 7.183397576 | 4.697606763 | 4.478413341 | 4.64048648  |
| ENSMUSG00000026032 | 0.215195012  | 6.29141723   | 0.726539985 | 0.394007018 | 0.999071534 | Ndufb3        | Ndufb3        | NDUFB3    | 78.0401973  | 48.91428664  | 90.61301658 | 87.76836478 | 68.73809224 | 60.75640487 | 96.42578728 | 74.47088368 | 74.48308503 | 92.74437063 |
| ENSMUSG00000066829 | -0.387669711 | 1.467833546  | 0.726229887 | 0.394107965 | 0.999071534 | Zfp810        | Zfp810        |           | 2.947561409 | 3.616692709  | 2.827449254 | 3.607869541 | 2.419894779 | 2.692199976 | 2.523896446 | 2.417885834 | 1.178529826 | 2.352922722 |
| ENSMUSG00000074807 | 0.551316392  | 0.278212365  | 0.726197959 | 0.394118361 | 0.999071534 | Gm10762       | Gm10762       |           | 0.912340436 | 0.889350666  | 1.009803305 | 0.346910533 | 1.438856355 | 1.746291877 | 1.423736457 | 0.621742072 | 1.571373102 | 0.849666539 |
| ENSMUSG00000024334 | -0.761947762 | -0.111331874 | 0.725984757 | 0.394187789 | 0.999071534 | H2-Oa         | H2-Oa         | HLA-DOA   | 1.263240604 | 2.01586151   | 0           | 0.832585279 | 1.046440986 | 1.091432423 | 0.906014109 | 0.138164905 | 0.549980586 | 0.196076894 |
| ENSMUSG00000043924 | 0.800371101  | -0.194713277 | 0.725242446 | 0.394429657 | 0.999071534 | Ncmap         | Ncmap         | NCMAP     | 0.070180034 | 0.118580089  | 1.144443746 | 1.318260024 | 0.130805123 | 0.727621615 | 0.129430587 | 1.105319238 | 1.492804447 | 0.980384468 |
| ENSMUSG00000021728 | -0.210498909 | 5.526035459  | 0.724800018 | 0.394573916 | 0.999071534 | Emb           | Emb           | EMB       | 62.67076995 | 54.90258112  | 46.04703071 | 44.19640187 | 48.79031095 | 72.32558855 | 49.6366301  | 36.95911203 | 18.5422026  | 37.31996873 |
| ENSMUSG00000056917 | -0.186891114 | 6.016430415  | 0.724672413 | 0.394615537 | 0.999071534 | Sipa1         | Sipa1         | SIPA1     | 69.61859327 | 64.98188867  | 80.24570265 | 66.53744018 | 75.80156889 | 85.93211276 | 41.93551017 | 56.57852851 | 41.95566182 | 70.91447649 |
| ENSMUSG00000026489 | 0.740242118  | 1.787113483  | 0.724477705 | 0.394679271 | 0.999071534 | Adck3         | Adck3         | ADCK3     | 8.842684226 | 0.770770577  | 1.144443746 | 0.069382107 | 2.354492217 | 2.983248622 | 13.65492692 | 0.483577167 | 1.885647722 | 1.30717929  |
| ENSMUSG00000031444 | -0.443652609 | 2.762655432  | 0.724400034 | 0.3947044   | 0.999071534 | F10           | F10           | F10       | 12.91312617 | 11.32439848  | 9.290190407 | 2.705902155 | 3.924153696 | 3.783632399 | 2.394465859 | 12.57300634 | 3.299883514 | 4.771204409 |
| ENSMUSG00000039706 | -0.344633142 | 2.613046185  | 0.724377724 | 0.39471168  | 0.999071534 | Ldb2          | Ldb2          | LD B2     | 5.403862583 | 8.715636528  | 7.068623136 | 8.325852786 | 5.035997243 | 7.348978314 | 4.206494076 | 2.348803381 | 6.049786443 | 5.490153018 |
| ENSMUSG00000028394 | 0.187666259  | 5.789619617  | 0.724173718 | 0.394778257 | 0.999071534 | Pole3         | Pole3         | POLE3     | 64.49545082 | 52.17523908  | 57.42414795 | 45.44527979 | 48.85571351 | 65.19489672 | 79.27623451 | 40.27506975 | 47.61260499 | 52.54860746 |
| ENSMUSG00000022911 | 0.328997809  | 3.981080134  | 0.724126465 | 0.394793681 | 0.999071534 | Arl13b        | Arl13b        | ARL13B    | 8.491784059 | 25.37613901  | 12.99280253 | 7.354053294 | 18.37811981 | 12.51509178 | 16.50239984 | 25.00784777 | 18.69933991 | 8.954178137 |
| ENSMUSG00000029027 | 0.340116931  | 2.037855567  | 0.724028726 | 0.394825585 | 0.999071534 | Dffb          | Dffb          | DFFB      | 3.859901845 | 4.446753331  | 2.827449254 | 3.607869541 | 3.466335765 | 5.020589145 | 4.983077598 | 3.730452429 | 3.064177549 | 4.836563373 |
| ENSMUSG00000071172 | 0.25569985   | 8.647370033  | 0.723977133 | 0.394842428 | 0.999071534 | Srsf3         | Srsf3         | SRSF3     | 494.2779762 | 304.9286984  | 374.3004251 | 381.6709681 | 341.4013715 | 579.2595679 | 681.8403321 | 235.77841   | 263.2835632 | 398.8204014 |
| ENSMUSG00000030161 | -0.235058033 | 6.010866967  | 0.723751414 | 0.394916127 | 0.999071534 | Gabarapl1     | Gabarapl1     | GABARAPL1 | 63.09185015 | 98.89579407  | 56.07774354 | 58.35035161 | 86.20057618 | 56.39067518 | 56.75531238 | 91.87966168 | 25.77051887 | 57.64660669 |

|                     |              |              |             |             |             |               |          |          |             |             |             |             |             |             |             |             |             |             |
|---------------------|--------------|--------------|-------------|-------------|-------------|---------------|----------|----------|-------------|-------------|-------------|-------------|-------------|-------------|-------------|-------------|-------------|-------------|
| ENSMUSG00000038379  | 0.260639532  | 4.506187843  | 0.723395014 | 0.395032536 | 0.999071534 | Ttk           | Ttk      | TTK      | 25.68589228 | 11.56155866 | 28.94769475 | 19.42698983 | 21.1250274  | 34.92583753 | 21.93848449 | 11.67493445 | 25.77051887 | 25.16320133 |
| ENSMUSG000000033128 | -0.190069294 | 6.483400234  | 0.723197842 | 0.395096958 | 0.999071534 | Gga1          | Gga1     | GGA1     | 93.83070485 | 96.22774207 | 101.7881732 | 95.12286808 | 107.3910061 | 103.4677937 | 52.87239477 | 84.83325154 | 66.46908221 | 97.84236986 |
| ENSMUSG000000023994 | -0.207440103 | 4.986141691  | 0.723108218 | 0.395126246 | 0.999071534 | Nfya          | Nfya     | NFYA     | 37.05505771 | 40.91013064 | 31.16926202 | 28.65481    | 38.45670622 | 53.55295088 | 25.69197151 | 26.25133191 | 15.71373102 | 26.3396627  |
| ENSMUSG000000004642 | 0.232901662  | 6.913757758  | 0.722903371 | 0.395193199 | 0.999071534 | Slbp          | Slbp     | SLBP     | 104.3577099 | 66.87917009 | 137.6698506 | 144.8698385 | 117.7246109 | 132.7181826 | 131.2426152 | 96.30093864 | 148.4161895 | 108.56124   |
| ENSMUSG00000073643  | 0.212116679  | 6.159062963  | 0.722811696 | 0.395223168 | 0.999071534 | Wdfy1         | Wdfy1    | WDFY1    | 54.74042616 | 74.46829578 | 74.65812436 | 69.17396023 | 69.52292298 | 63.37584269 | 55.91401357 | 110.9464185 | 67.17620011 | 66.01255415 |
| ENSMUSG00000097796  | 0.468386079  | 2.133712522  | 0.722583377 | 0.39529782  | 0.999071534 | Gm16702       | Gm16702  |          | 3.228281543 | 2.01586151  | 3.702612119 | 7.423885401 | 1.896674286 | 2.255627007 | 2.78275762  | 3.108710358 | 8.485414751 | 5.751588876 |
| ENSMUSG000000025733 | -0.209940793 | 4.523802604  | 0.722407429 | 0.395355363 | 0.999071534 | Rhot2         | Rhot2    | RHOT2    | 29.61597415 | 26.68051998 | 27.06272858 | 17.13738032 | 27.53447843 | 28.59552948 | 19.73816451 | 24.04069343 | 14.77090716 | 16.79725388 |
| ENSMUSG00000098056  | 0.722325776  | -0.326429397 | 0.722245127 | 0.395408453 | 0.999071534 | Gm8100        | Gm8100   |          | 0.280720134 | 1.245090933 | 0.336601102 | 0.20814632  | 0.588623054 | 0.363810808 | 0.711868228 | 0.414494714 | 1.885647722 | 0.392153787 |
| ENSMUSG000000062825 | -0.234565562 | 12.30274946  | 0.72164557  | 0.395604662 | 0.999071534 | Actg1         | Actg1    | ACTG1    | 5872.454667 | 7751.165375 | 4290.183002 | 4922.591078 | 5593.881093 | 6703.21413  | 4840.768668 | 4305.840175 | 2356.273966 | 4899.046543 |
| ENSMUSG000000015790 | -0.187137926 | 5.007957153  | 0.721250498 | 0.395734029 | 0.999071534 | Surf1         | Surf1    | SURF1    | 37.12523774 | 44.05250299 | 26.92808814 | 30.66689109 | 38.84912159 | 34.70755105 | 25.8214021  | 27.77114586 | 23.17775325 | 33.98666154 |
| ENSMUSG000000073775 | 0.260857113  | 4.874757567  | 0.721143585 | 0.395769048 | 0.999071534 | Kti12         | Kti12    | KTI12    | 41.26585972 | 20.21790514 | 32.24638554 | 18.45564034 | 26.55344001 | 54.20781033 | 43.74753839 | 15.33630443 | 23.02061594 | 22.48348379 |
| ENSMUSG000000036819 | -0.30850175  | 2.947624083  | 0.721143378 | 0.395769116 | 0.999071534 | Jmjd4         | Jmjd4    | JMJD4    | 10.8779052  | 8.952796705 | 7.539864678 | 8.187088573 | 8.044515076 | 12.15128097 | 6.406814054 | 3.523205072 | 4.714119306 | 7.058768167 |
| ENSMUSG000000028755 | -0.642240675 | 0.325908519  | 0.720949712 | 0.395832563 | 0.999071534 | Cda           | Cda      | CDA      | 1.965040939 | 1.719411288 | 1.817645949 | 0.277528426 | 1.373453794 | 0.072762162 | 0.517722348 | 1.243484143 | 0.864255206 | 1.30717929  |
| ENSMUSG000000027133 | 0.21672575   | 5.824952891  | 0.720732515 | 0.395903736 | 0.999071534 | Nop10         | Nop10    | NOP10    | 58.74068807 | 37.35272798 | 56.27970421 | 59.18293689 | 59.58173361 | 48.89617254 | 87.17150032 | 37.92626636 | 53.50525412 | 62.87532385 |
| ENSMUSG000000034621 | 0.236059409  | 4.70952968   | 0.720658294 | 0.395928062 | 0.999071534 | Gpatch8       | Gpatch8  | GPATCH8  | 16.84320805 | 27.74774078 | 25.11044219 | 27.40593209 | 26.61884257 | 30.41458352 | 14.04321869 | 35.09388582 | 23.4902787  | 32.41804639 |
| ENSMUSG000000021759 | 0.181226195  | 5.571169323  | 0.72061124  | 0.395943104 | 0.999071534 | Ppap2a        | Ppp1     | PLPP1    | 45.8275619  | 44.17108308 | 42.6810197  | 50.09388093 | 47.54766228 | 58.28249138 | 56.82002767 | 32.88324734 | 40.0700141  | 56.79694015 |
| ENSMUSG000000029471 | 0.209687683  | 5.311893341  | 0.720600869 | 0.395946884 | 0.999071534 | Camkk2        | Camkk2   | CAMKK2   | 30.73885469 | 26.91768016 | 49.14376085 | 46.6247756  | 36.03681144 | 49.33274551 | 32.35764674 | 33.78131922 | 41.48424989 | 47.18917237 |
| ENSMUSG000000050379 | -0.242852872 | 3.980363743  | 0.720569417 | 0.395957193 | 0.999071534 | 6-Sep         | 6-Sep    | 6-Sep    | 17.61518842 | 12.56948941 | 24.36991976 | 14.29271395 | 19.35915823 | 21.02826468 | 14.69037162 | 12.08942917 | 11.86386692 | 10.58815225 |
| ENSMUSG000000053886 | 1.013671325  | -0.435358038 | 0.720545247 | 0.395965116 | 0.999071534 | Sh2d4a        | Sh2d4a   | SH2D4A   | 1.684320805 | 0.177870133 | 0           | 0           | 0.327012808 | 0.582097292 | 0.841298815 | 0           | 1.649941757 | 0.71894861  |
| ENSMUSG000000050675 | 0.849766026  | -0.414817903 | 0.720519128 | 0.395973679 | 0.999071534 | Gp1ba         | Gp1ba    | GP1BA    | 0.771980369 | 0.474320355 | 0.06732022  | 0.138764213 | 0.915635862 | 0.291048646 | 0           | 0.690824524 | 1.492804447 | 1.176461361 |
| ENSMUSG000000051748 | -0.665953483 | 0.609194969  | 0.720508426 | 0.395977187 | 0.999071534 | 1100001G20Rik | Wfdc21   |          | 6.386383052 | 0.474320355 | 0.942483085 | 0.555056852 | 0.654025616 | 1.819054038 | 1.68259763  | 0.621742072 | 0.864255206 | 0.326794823 |
| ENSMUSG000000027374 | 0.186012973  | 5.191317518  | 0.720486708 | 0.395984307 | 0.999071534 | Mrps5         | Mrps5    | MRPS5    | 31.86173523 | 30.23792265 | 43.82546344 | 31.84638691 | 39.11073183 | 40.67404829 | 31.96935498 | 41.24222408 | 30.95605011 | 42.02581418 |
| ENSMUSG000000022103 | -0.206039834 | 5.467803374  | 0.720025173 | 0.396135652 | 0.999071534 | Gfra2         | Gfra2    | GFRA2    | 44.07306106 | 40.73226051 | 37.43004251 | 52.73040098 | 70.43855884 | 48.0230266  | 28.99245148 | 33.91948413 | 40.22715141 | 45.81663412 |
| ENSMUSG000000004187 | -0.537547716 | 0.9687438    | 0.719999406 | 0.396144104 | 0.999071534 | Klfc2         | Klfc2    | KIFC2    | 1.403600671 | 1.304380977 | 3.096730136 | 2.844666369 | 2.485297341 | 0.363810808 | 0.647152935 | 2.556050739 | 0.864255206 | 2.548999616 |
| ENSMUSG000000029409 | -0.585077305 | 1.171521176  | 0.719845917 | 0.396194456 | 0.999071534 | U90926        | U90926   |          | 2.17558104  | 3.913142931 | 3.164050356 | 1.526406344 | 2.419894779 | 0.654859454 | 2.523896446 | 3.108710358 | 0           | 1.895409971 |
| ENSMUSG000000034826 | 0.176262714  | 5.416438441  | 0.719791832 | 0.3962122   | 0.999071534 | Nup54         | Nup54    | NUP54    | 38.45865838 | 46.12765455 | 41.40193551 | 34.34414274 | 47.74386997 | 55.29924276 | 49.11890775 | 43.86735727 | 35.27732614 | 36.20886634 |
| ENSMUSG000000047497 | -0.698278851 | 1.662896079  | 0.719629883 | 0.396265341 | 0.999071534 | Adamts12      | Adamts12 | ADAMTS12 | 3.087921476 | 9.130666839 | 2.558168373 | 2.914048475 | 1.700466601 | 7.057929668 | 4.27120937  | 0.898071881 | 0           | 0.196076894 |
| ENSMUSG000000022537 | 0.287987995  | 3.25274267   | 0.719503201 | 0.396306917 | 0.999071534 | Tmem44        | Tmem44   | TMEM44   | 9.404124495 | 8.715636528 | 8.549667983 | 7.978942253 | 9.352566308 | 10.33222694 | 5.565515239 | 13.54016067 | 7.778296855 | 12.54892118 |
| ENSMUSG000000022721 | 0.181044767  | 5.387904707  | 0.719407937 | 0.396338185 | 0.999071534 | Trmt2a        | Trmt2a   | TRMT2A   | 52.07358489 | 38.36065873 | 37.96860427 | 32.19329744 | 43.36189834 | 56.82724815 | 46.20671954 | 33.15957715 | 33.15597245 | 47.58132616 |
| ENSMUSG000000015222 | -0.637426857 | 0.677822693  | 0.718951045 | 0.396488201 | 0.999071534 | Map2          | Map2     | MAP2     | 1.473780704 | 3.557402664 | 2.01960661  | 0.624438959 | 1.569661478 | 2.910486461 | 1.812028217 | 0.483577167 | 0           | 0.784307574 |
| ENSMUSG000000030554 | -0.480286059 | 1.096746048  | 0.718851548 | 0.396520881 | 0.999071534 | Synn          | Synn     | SYNM     | 5.263502516 | 1.304380977 | 2.827449254 | 1.318260024 | 1.504258917 | 2.182864846 | 2.070889391 | 0.828989429 | 1.099961171 | 2.0261279   |
| ENSMUSG000000021361 | 0.244877063  | 6.5567361    | 0.718776592 | 0.396545502 | 0.999071534 | Tmem14c       | Tmem14c  | TMEM14B  | 123.6572191 | 75.89125684 | 75.60060744 | 79.16498357 | 93.78727333 | 112.4175396 | 188.7097958 | 64.38484563 | 60.26215846 | 74.70529643 |
| ENSMUSG000000024413 | -0.259480303 | 5.176614525  | 0.71869478  | 0.396572379 | 0.999071534 | Npc1          | Npc1     | NPC1     | 35.65145704 | 64.6261484  | 33.05422819 | 32.54020797 | 38.58751134 | 41.47443207 | 31.19277146 | 47.25239744 | 9.978219197 | 33.20235397 |
| ENSMUSG000000028221 | 0.182125531  | 5.42355076   | 0.718647293 | 0.39658798  | 0.999071534 | Tmem55a       | Tmem55a  | TMEM55A  | 35.1601968  | 39.72432975 | 41.80585683 | 37.46633754 | 54.28412612 | 49.40550767 | 47.630456   | 42.48570822 | 41.24854393 | 37.97355838 |
| ENSMUSG000000001228 | 0.288483523  | 5.643037826  | 0.718542283 | 0.396622483 | 0.999071534 | Uhrf1         | Uhrf1    | UHRF1    | 53.54736559 | 39.7836198  | 55.74114244 | 34.48290695 | 50.29456987 | 130.6808421 | 64.13285584 | 17.47786046 | 31.97744262 | 38.23499424 |
| ENSMUSG000000032123 | -0.209098296 | 4.943680495  | 0.71824871  | 0.396718965 | 0.999071534 | Dpagt1        | Dpagt1   | DPAGT1   | 38.17793825 | 26.20619963 | 35.88167744 | 41.2823534  | 28.31930917 | 41.9837672  | 33.97552908 | 19.55033403 | 17.52081009 | 27.97363681 |
| ENSMUSG000000023191 | -0.210238936 | 5.331823295  | 0.718092152 | 0.396770432 | 0.999071534 | Leprel2       | P3h3     | P3H3     | 39.51135888 | 54.42826077 | 39.24768846 | 52.66101887 | 36.69083706 | 40.01918884 | 34.36382084 | 31.43251584 | 44.31272148 | 26.27430373 |
| ENSMUSG000000032330 | 0.245170785  | 7.650798818  | 0.717371391 | 0.397007497 | 0.999071534 | Cox7a2        | Cox7a2   | COX7A2   | 214.4000025 | 151.3674834 | 179.341067  | 243.1149013 | 160.9557041 | 140.2126853 | 286.5593195 | 204.6913064 | 197.9144422 | 200.3252262 |
| ENSMUSG000000066553 | -0.586445601 | 3.166531731  | 0.717074421 | 0.397105232 | 0.999071534 | Gm6969        | Gm6969   |          | 14.38690688 | 20.75151554 | 4.308494102 | 5.134275885 | 11.05303291 | 11.56918368 | 15.53167044 | 4.490359406 | 0           | 4.771204409 |

|                    |              |              |             |             |             |               |               |             |  |             |             |             |             |             |             |             |             |             |             |             |
|--------------------|--------------|--------------|-------------|-------------|-------------|---------------|---------------|-------------|--|-------------|-------------|-------------|-------------|-------------|-------------|-------------|-------------|-------------|-------------|-------------|
| ENSMUSG00000078808 | 0.448003235  | 1.686194451  | 0.716958691 | 0.397143329 | 0.999071534 | Vmn1r58       | Vmn1r58       |             |  |             | 1.965040939 | 2.786632087 | 5.587578288 | 1.248877918 | 2.027479409 | 2.40115133  | 2.265035272 | 3.385040167 | 5.106962581 | 3.33330719  |
| ENSMUSG00000005881 | -0.222595064 | 6.595046029  | 0.716862634 | 0.397174954 | 0.999071534 | Ergic3        | Ergic3        | ERGIC3      |  |             | 124.6397396 | 156.5850073 | 72.50387731 | 78.05486987 | 111.1189522 | 87.46011815 | 118.8172788 | 98.85698938 | 49.02684078 | 80.19544945 |
| ENSMUSG00000074796 | -0.390540901 | 1.794587966  | 0.716803886 | 0.397194298 | 0.999071534 | Slc4a11       | Slc4a11       | SLC4A11     |  |             | 4.210802013 | 5.158233863 | 2.692808814 | 3.607869541 | 3.989556257 | 3.783632399 | 1.48845175  | 3.730452429 | 2.985608894 | 1.895409971 |
| ENSMUSG00000020000 | 0.220615918  | 5.624039128  | 0.71651097  | 0.397290764 | 0.999071534 | Moxd1         | Moxd1         | MOXD1       |  |             | 42.59928036 | 48.85499659 | 62.80976558 | 30.94441952 | 51.66802366 | 101.1394045 | 53.26068653 | 37.64993655 | 27.73473525 | 48.36563373 |
| ENSMUSG00000075227 | -0.207321252 | 4.629214921  | 0.716467522 | 0.397305076 | 0.999071534 | Znhit2        | Znhit2        | ZNHIT2      |  |             | 28.14219345 | 19.0913943  | 31.50586312 | 30.59750899 | 27.20746562 | 25.83056734 | 21.35604685 | 17.82327272 | 18.69933991 | 26.92789338 |
| ENSMUSG00000032067 | 0.273675625  | 3.591816693  | 0.716412133 | 0.397323322 | 0.999071534 | Pts           | Pts           | PTS         |  |             | 12.562226   | 8.597056439 | 8.011106221 | 14.63962448 | 12.03407133 | 10.91432423 | 17.40841395 | 14.99089217 | 8.642552061 | 10.91494707 |
| ENSMUSG00000030474 | -0.449347149 | 1.801574721  | 0.716179189 | 0.397400071 | 0.999071534 | Siglece       | Siglece       | SIGLEC9     |  |             | 7.158363421 | 2.430891821 | 5.049016526 | 1.942698983 | 3.662543449 | 6.403070214 | 2.070889391 | 1.796143762 | 0.864255206 | 3.464025119 |
| ENSMUSG00000023055 | -0.30662836  | 5.508049487  | 0.716018281 | 0.397453099 | 0.999071534 | Calcoco1      | Calcoco1      | CALCOCO1    |  |             | 39.79207902 | 69.07290173 | 41.33461529 | 44.05763766 | 67.03762564 | 30.41458352 | 14.43151045 | 84.55692173 | 25.45624425 | 38.62714802 |
| ENSMUSG00000084416 | -0.261866735 | 9.71572597   | 0.71574236  | 0.397544053 | 0.999071534 | Rpl10a-ps1    | Rpl10a-ps1    |             |  |             | 1451.042374 | 926.584814  | 719.9224363 | 946.3719333 | 719.6897878 | 834.0726575 | 1184.354586 | 544.7842196 | 388.8362741 | 811.7583392 |
| ENSMUSG00000024640 | 0.249468284  | 5.693903285  | 0.715618565 | 0.397584871 | 0.999071534 | Psat1         | Psat1         | PSAT1       |  |             | 60.21446878 | 41.97735144 | 47.9993171  | 42.73937763 | 52.64906208 | 87.96945328 | 98.36724609 | 32.53783508 | 26.2419308  | 36.79709702 |
| ENSMUSG00000079419 | 0.32359649   | 6.442058936  | 0.715409219 | 0.39765391  | 0.999071534 | Ms4a6c        | Ms4a6c        | MS4A6E      |  |             | 132.1490032 | 81.52381106 | 49.34572151 | 69.38210655 | 69.6537281  | 149.9628149 | 201.9764309 | 39.44608032 | 42.97705434 | 52.02573575 |
| ENSMUSG00000024732 | 0.238016527  | 4.858944563  | 0.715009259 | 0.397785858 | 0.999071534 | Ccdc86        | Ccdc86        | CCDC86      |  |             | 34.7391166  | 21.34441599 | 27.87057122 | 24.14497308 | 29.88897065 | 56.90001031 | 38.63503021 | 15.40538688 | 21.60638015 | 24.24817583 |
| ENSMUSG00000040771 | 0.201680793  | 4.504316545  | 0.714639477 | 0.397907907 | 0.999071534 | Oard1         | Oard1         | OARD1       |  |             | 22.66815083 | 18.20204363 | 23.89867822 | 24.49188361 | 19.35915823 | 24.52084843 | 25.62725622 | 20.72473572 | 19.09218319 | 26.53573959 |
| ENSMUSG00000097317 | 0.974034785  | -0.544248696 | 0.714576149 | 0.397928814 | 0.999071534 | Gm17281       | Gm17281       |             |  | 0           | 0.177870133 | 0.875162864 | 0.693821065 | 0.196207685 | 0           | 0.064715293 | 0.414494714 | 1.257098482 | 1.633974113 |             |
| ENSMUSG00000057113 | 0.230496739  | 10.59874923  | 0.714412872 | 0.397982726 | 0.999071534 | Npm1          | Npm1          | NPM1        |  |             | 1336.438379 | 1328.037705 | 1789.371457 | 1559.640373 | 1374.434832 | 1436.543355 | 1729.775079 | 1409.420194 | 1791.365336 | 1545.870228 |
| ENSMUSG00000037966 | -0.260492077 | 6.000102221  | 0.714047799 | 0.398103307 | 0.999071534 | Ninj1         | Ninj1         | NINJ1       |  |             | 103.3050094 | 90.41731772 | 46.3163116  | 47.11045035 | 77.17502268 | 80.62047497 | 94.48432848 | 53.2625708  | 23.02061594 | 39.08466077 |
| ENSMUSG00000028883 | -0.197282995 | 5.975542366  | 0.714042395 | 0.398105092 | 0.999071534 | Sema3a        | Sema3a        | SEMA3A      |  |             | 56.35456693 | 82.05742146 | 58.43395126 | 80.34447938 | 69.98074091 | 74.36292908 | 80.18224862 | 46.49249046 | 41.48424989 | 44.11730104 |
| ENSMUSG00000092229 | -0.888909105 | -0.350765957 | 0.714007262 | 0.398116699 | 0.999071534 | Gm5977        | Gm5977        |             |  | 0.561440268 | 0.415030311 | 1.88496617  | 1.179495811 | 0.327012808 | 0           | 0.19414588  | 1.312566595 | 0.549980586 |             | 0           |
| ENSMUSG00000040026 | -0.302578701 | 4.462294439  | 0.713280613 | 0.398356875 | 0.999071534 | Saa3          | Saa3          |             |  |             | 31.93191526 | 31.83875385 | 23.1581558  | 24.70002993 | 13.86534306 | 10.04117829 | 10.8721693  | 31.25226848 | 13.98522061 | 26.53573959 |
| ENSMUSG00000031660 | -0.187467548 | 5.435014885  | 0.712984673 | 0.39845475  | 0.999071534 | Brd7          | Brd7          | BRD7        |  |             | 33.33551593 | 44.94185366 | 50.89408658 | 57.30962001 | 50.81779036 | 53.84399953 | 40.25291254 | 34.40306129 | 31.34889338 | 37.31996873 |
| ENSMUSG00000095609 | -0.547357716 | 0.927841821  | 0.712982943 | 0.398455322 | 0.999071534 | Gm21188       | Gm21188       |             |  |             | 3.930081878 | 0.711480533 | 3.433331237 | 1.595788451 | 1.24264867  | 1.964578361 | 2.718042326 | 0.621742072 | 0.31427462  | 1.568615148 |
| ENSMUSG00000022013 | 0.249894798  | 6.221106586  | 0.712375415 | 0.398656358 | 0.999071534 | Dnajc15       | Dnajc15       | DNAJC15     |  |             | 99.7960077  | 45.06043375 | 67.32022034 | 86.72763319 | 52.84526977 | 49.69655632 | 120.9528835 | 64.79934035 | 69.84753438 | 78.10396258 |
| ENSMUSG00000078122 | 0.295467711  | 2.840415056  | 0.712121044 | 0.398740575 | 0.999071534 | F630028O10Rik | F630028O10Rik |             |  | 8.140883891 | 5.988294485 | 5.250977187 | 6.383153803 | 7.063476652 | 10.18670261 | 9.383717555 | 5.388431287 | 5.106962581 | 8.039152634 |             |
| ENSMUSG00000045672 | 0.269843243  | 5.979050215  | 0.711977632 | 0.398788067 | 0.999071534 | Col27a1       | Col27a1       | COL27A1     |  |             | 49.68746375 | 46.24623464 | 101.9228136 | 53.77113258 | 43.81971627 | 72.6166372  | 39.31602795 | 60.30898094 | 58.37651074 | 110.6527269 |
| ENSMUSG00000028937 | -0.193934513 | 6.824082702  | 0.711900228 | 0.398813703 | 0.999071534 | Acot7         | Acot7         | ACOT7       |  |             | 143.2374485 | 107.9671709 | 141.3724627 | 111.358281  | 123.8070491 | 133.7368529 | 127.1008364 | 75.92161518 | 67.96188666 | 114.3781879 |
| ENSMUSG00000032006 | -0.323856428 | 5.208676164  | 0.711676467 | 0.398887827 | 0.999071534 | Pdgfd         | Pdgfd         | PDGFD       |  |             | 29.68615419 | 49.98150744 | 33.99671127 | 65.7048549  | 31.0008142  | 41.0378591  | 72.67527458 | 13.47107822 | 15.55659371 | 20.0652021  |
| ENSMUSG00000020948 | -0.594693969 | 1.809192715  | 0.710792112 | 0.399180975 | 0.999071534 | Klhl28        | Klhl28        | KLHL28      |  |             | 4.070441945 | 7.233385418 | 2.490848153 | 2.567137942 | 4.774386997 | 4.29296753  | 6.212668174 | 1.865226215 | 1.099961171 | 0           |
| ENSMUSG00000037005 | -0.607567575 | 0.347411731  | 0.710653716 | 0.39922688  | 0.999071534 | Xpnpep2       | Xpnpep2       | XPNPEP2     |  |             | 1.122880537 | 1.245090933 | 2.490848153 | 1.248877918 | 0.981038424 | 1.45524323  | 0.323576467 | 1.865226215 | 0.078568655 | 0.784307574 |
| ENSMUSG00000012114 | -0.207001843 | 5.849819791  | 0.710393276 | 0.399313285 | 0.999071534 | Med15         | Med15         | MED15       |  |             | 54.8106062  | 75.35764644 | 73.10975929 | 43.98825555 | 74.23190741 | 66.14080482 | 35.14040436 | 75.50712047 | 34.88448286 | 49.01922338 |
| ENSMUSG00000035954 | -0.3746898   | 3.374066278  | 0.710288598 | 0.399348021 | 0.999071534 | Dock4         | Dock4         | DOCK4       |  |             | 15.29924731 | 21.81873634 | 4.106533441 | 7.285121188 | 11.96866877 | 20.2278809  | 8.607134033 | 5.043019025 | 4.00700141  | 7.97379367  |
| ENSMUSG00000071547 | -0.221140853 | 6.148434442  | 0.710183244 | 0.399382986 | 0.999071534 | Nt5dc2        | Nt5dc2        | NTSDC2      |  |             | 71.65381425 | 97.88786332 | 61.86728249 | 53.28545783 | 113.8004572 | 79.01970741 | 84.06516623 | 64.38484563 | 29.07040239 | 66.92757965 |
| ENSMUSG00000025402 | -0.233788983 | 6.070318086  | 0.710144151 | 0.399395961 | 0.999071534 | Nab2          | Nab2          | NAB2        |  |             | 56.9160072  | 98.89579407 | 75.06204568 | 56.54641684 | 90.255535   | 66.86842644 | 34.55796672 | 97.61350523 | 41.24854393 | 58.10411944 |
| ENSMUSG00000024018 | 0.261514042  | 3.488897164  | 0.710090206 | 0.399413867 | 0.999071534 | Ccdc167       | Ccdc167       | CCDC167     |  |             | 12.42186594 | 7.648415729 | 10.09803305 | 11.03175494 | 11.18383803 | 13.02442691 | 16.43768454 | 10.36236786 | 7.778296855 | 11.37245982 |
| ENSMUSG00000031864 | -0.19889783  | 4.716684276  | 0.709826639 | 0.39950137  | 0.999071534 | Ints10        | Ints10        | INTS10      |  |             | 24.63319177 | 26.97697021 | 33.12154841 | 29.6261595  | 30.60839883 | 39.00051858 | 23.42693624 | 19.20492177 | 16.26371161 | 23.07171447 |
| ENSMUSG00000037410 | -0.230785011 | 5.375104057  | 0.709042169 | 0.399761972 | 0.999071534 | Tbc1d2b       | Tbc1d2b       | TBC1D2B     |  |             | 47.44170267 | 63.61821765 | 37.90128405 | 35.38487434 | 48.59410327 | 67.81433454 | 33.97552908 | 38.68617334 | 13.98522061 | 38.43107113 |
| ENSMUSG00000026158 | 0.241066311  | 5.191935751  | 0.70884259  | 0.399828312 | 0.999071534 | Ogfrl1        | Ogfrl1        | OGFRL1      |  |             | 31.58101509 | 26.56193989 | 40.59409287 | 39.89471127 | 33.94392947 | 40.23747532 | 24.07408917 | 25.90591965 | 54.91948991 | 39.60753249 |
| ENSMUSG00000033278 | -0.18912142  | 5.396442544  | 0.708530684 | 0.399932021 | 0.999071534 | Ptpnm         | Ptpnm         | PTPRM       |  |             | 32.98461576 | 53.24245988 | 49.95160349 | 45.79219032 | 49.96755706 | 42.63862665 | 32.22821615 | 47.52872725 | 31.97744262 | 34.77096912 |
| ENSMUSG00000082474 | 0.563081118  | 0.542177178  | 0.708495041 | 0.399943875 | 0.999071534 | Gm8213        | Gm8213        |             |  | 0.912340436 | 1.067220799 | 0.538561763 | 1.040731598 | 2.027479409 | 0.291048646 | 1.48845175  | 1.243484143 | 1.807079067 | 2.483640651 |             |
| ENSMUSG00000033373 | -0.239134026 | 4.025883845  | 0.708344836 | 0.399993835 | 0.999071534 | Fntb          | Fntb          | CHURC1-FNTB |  |             | 17.26428825 | 20.92938568 | 21.81175139 | 13.25198235 | 17.78949675 | 19.13644848 | 11.06631518 | 19.41216912 | 12.02100423 | 10.32671639 |

|                    |              |              |             |             |             |               |               |          |             |             |             |             |             |             |             |             |             |             |
|--------------------|--------------|--------------|-------------|-------------|-------------|---------------|---------------|----------|-------------|-------------|-------------|-------------|-------------|-------------|-------------|-------------|-------------|-------------|
| ENSMUSG00000031253 | 0.937983267  | 1.04847334   | 0.707952704 | 0.400124304 | 0.999071534 | Srpx2         | Srpx2         | SRPX2    | 2.737021308 | 1.245090933 | 2.154247051 | 0           | 0.784830739 | 4.147443207 | 8.283557565 | 0           | 0           | 0.653589645 |
| ENSMUSG00000079492 | 0.408253699  | 7.603630959  | 0.70772001  | 0.400201754 | 0.999071534 | Gm11127       | Gm11127       |          | 148.2202308 | 43.69676273 | 216.0305871 | 335.4624852 | 107.260201  | 114.3093558 | 103.4797543 | 156.4026722 | 368.4869924 | 257.5143201 |
| ENSMUSG00000026708 | 0.325749726  | 3.857961953  | 0.707605449 | 0.400239893 | 0.999071534 | Cenpl         | Cenpl         | CENPL    | 23.29977114 | 11.97658897 | 9.89607239  | 8.256470679 | 13.34212257 | 26.41266463 | 27.18042326 | 10.70778012 | 9.113963991 | 6.666614379 |
| ENSMUSG00000059183 | 0.304585031  | 2.70708736   | 0.707543145 | 0.400260637 | 0.999071534 | Mtfmt         | Mtfmt         | MTFMT    | 6.035482885 | 3.853852886 | 8.213066882 | 5.82809695  | 5.75542542  | 8.367648575 | 6.924536402 | 7.460904859 | 5.656943167 | 5.882306805 |
| ENSMUSG00000022965 | -0.23477265  | 5.261083771  | 0.707433206 | 0.400297244 | 0.999071534 | lfngr2        | lfngr2        | IFNGR2   | 50.17872398 | 50.3372477  | 32.58298665 | 40.44976812 | 41.33441893 | 61.48402649 | 46.72444189 | 24.73151796 | 13.43524002 | 31.69909778 |
| ENSMUSG00000022299 | 0.288756281  | 3.803461804  | 0.707223954 | 0.400366935 | 0.999071534 | Slc25a32      | Slc25a32      | SLC25A32 | 17.96608859 | 13.57742017 | 13.12744297 | 9.921641237 | 10.26820217 | 22.26522143 | 21.61490802 | 9.80970824  | 14.06378926 | 6.601255415 |
| ENSMUSG00000091618 | 0.677722081  | 0.262520936  | 0.706766639 | 0.400519303 | 0.999071534 | H60c          | H60c          |          | 1.052700503 | 1.897281421 | 0           | 0.277528426 | 1.046440986 | 1.600767553 | 1.812028217 | 1.381649048 | 0.392843275 | 1.30717929  |
| ENSMUSG00000097657 | 0.5928045    | 0.427239266  | 0.706675562 | 0.400549659 | 0.999071534 | Gm7389        | Gm7389        |          | 0.98252047  | 0.474320355 | 2.086926831 | 1.110113705 | 0.39241537  | 0.727621615 | 0.776583522 | 1.105319238 | 2.749902928 | 1.30717929  |
| ENSMUSG00000070462 | 0.18826363   | 5.149773133  | 0.706605577 | 0.400572986 | 0.999071534 | Mesdc1        | Mesdc1        | MESDC1   | 40.28333925 | 30.77153305 | 36.89148075 | 31.56885848 | 32.24346287 | 55.51752924 | 32.55179262 | 31.6397632  | 35.12018883 | 28.88866231 |
| ENSMUSG00000028557 | 0.256473376  | 8.809697188  | 0.706545077 | 0.400593154 | 0.999071534 | Rnf11         | Rnf11         | RNF11    | 400.3770914 | 466.6126495 | 349.6612245 | 449.8735789 | 454.0245826 | 266.5277977 | 499.9256421 | 687.9230609 | 422.6993644 | 418.1666549 |
| ENSMUSG00000035824 | -0.199652128 | 4.513013726  | 0.706374197 | 0.400650125 | 0.999071534 | Tk2           | Tk2           | TK2      | 29.05453389 | 25.43542905 | 21.74443117 | 26.4345826  | 23.21790937 | 22.99284304 | 21.16190097 | 24.17885834 | 14.61376985 | 19.60768935 |
| ENSMUSG00000054435 | -0.26886247  | 3.827913141  | 0.706192952 | 0.400710564 | 0.999071534 | Gimap4        | Gimap4        | GIMAP4   | 19.93112953 | 20.33648523 | 13.19476319 | 11.93372233 | 14.78097892 | 21.173789   | 13.13720458 | 5.941090906 | 8.642552061 | 14.70576701 |
| ENSMUSG00000065265 | 0.667935279  | -0.164635149 | 0.706191372 | 0.400711091 | 0.999071534 | Gm23455       | Gm23455       | SNORA32  | 0.280720134 | 0.059290044 | 0.875162864 | 1.040731598 | 0.784830739 | 0.654859454 | 0.582437641 | 0.759906976 | 1.178529826 | 1.241820326 |
| ENSMUSG00000050428 | 0.264372292  | 3.624876394  | 0.706151104 | 0.400724521 | 0.999071534 | Fbxo46        | Fbxo46        | FBXO46   | 12.562226   | 10.96865822 | 14.00260583 | 5.411804311 | 15.10799173 | 13.67928637 | 13.20191987 | 14.507315   | 10.92104306 | 11.82997258 |
| ENSMUSG00000024163 | 0.258846465  | 6.083079881  | 0.70612113  | 0.400734518 | 0.999071534 | Mapk8ip3      | Mapk8ip3      | MAPK8IP3 | 48.42422314 | 68.42071125 | 58.77055236 | 58.97479057 | 85.74275825 | 47.44092931 | 36.04641847 | 105.4889048 | 55.70517646 | 104.8357791 |
| ENSMUSG00000020315 | -0.218455744 | 7.612226173  | 0.706045271 | 0.40075982  | 0.999071534 | Sptbn1        | Sptbn1        | SPTBN1   | 176.5729644 | 297.0431225 | 188.496617  | 176.2999327 | 257.0320671 | 239.9696087 | 162.5648172 | 204.9676363 | 114.3173932 | 166.4692826 |
| ENSMUSG00000031916 | 0.199513204  | 5.139808173  | 0.706011161 | 0.400771199 | 0.999071534 | Cog8          | Cog8          | COG8     | 42.45892029 | 33.26171491 | 34.19867193 | 29.76492371 | 30.34678858 | 40.091951   | 37.85844669 | 22.24454967 | 34.6487769  | 45.88199308 |
| ENSMUSG00000028879 | -0.197038712 | 6.278597956  | 0.705914277 | 0.400803519 | 0.999071534 | Stx12         | Stx12         | STX12    | 98.74330719 | 94.21188056 | 66.31041704 | 77.01413827 | 94.70290919 | 108.2700963 | 94.48432848 | 53.4007357  | 45.01983937 | 57.38517084 |
| ENSMUSG00000042404 | -0.271380109 | 3.636768362  | 0.705879012 | 0.400815284 | 0.999071534 | Dennd4b       | Dennd4b       | DENND4B  | 17.19410822 | 17.07553279 | 11.04051614 | 12.00310443 | 12.75349951 | 15.4983404  | 7.377543457 | 9.187966168 | 6.12835098  | 16.99333077 |
| ENSMUSG00000006360 | -0.284090251 | 5.727658996  | 0.705785133 | 0.400846607 | 0.999071534 | Crip1         | Crip1         | CRIP1    | 104.9893302 | 26.68051998 | 66.71433836 | 73.26750452 | 28.31930917 | 63.81241566 | 68.01577345 | 36.06104015 | 29.14897104 | 38.36571216 |
| ENSMUSG00000067149 | 0.681104448  | -0.103871857 | 0.705206393 | 0.401039781 | 0.999071534 | Igj           | Ichain        | JCHAIN   | 0.280720134 | 0.830060622 | 1.211763966 | 0.624438959 | 0.261610246 | 0.727621615 | 0.388291761 | 0.27632981  | 2.042785033 | 1.111102397 |
| ENSMUSG00000087594 | -0.548554579 | 1.265492025  | 0.705147805 | 0.401059345 | 0.999071534 | BC039771      | BC039771      |          | 1.965040939 | 3.913142931 | 1.88496617  | 4.301690606 | 1.831271725 | 0.9459081   | 0.388291761 | 2.486968286 | 3.69272679  | 0.71894861  |
| ENSMUSG00000024740 | -0.228323147 | 9.10075252   | 0.704906585 | 0.401139906 | 0.999071534 | Ddb1          | Ddb1          | DDB1     | 716.6785025 | 802.372171  | 498.910153  | 491.4334607 | 576.7197882 | 847.0970844 | 520.1168137 | 408.4154586 | 332.1097051 | 413.0686557 |
| ENSMUSG00000033964 | 0.199293527  | 4.974078906  | 0.704757861 | 0.401189587 | 0.999071534 | Zbtb41        | Zbtb41        | ZBTB41   | 24.91391191 | 27.09555029 | 32.4483462  | 32.95650061 | 33.5515141  | 43.22072394 | 43.16510075 | 33.50498941 | 18.5422026  | 26.60109855 |
| ENSMUSG00000078700 | 0.415860158  | 1.744648969  | 0.704671259 | 0.401218521 | 0.999071534 | D030028A08Rik | D030028A08Rik |          | 5.403862583 | 1.185800888 | 2.962089695 | 2.358991623 | 2.485297341 | 6.548594537 | 2.912188207 | 2.486968286 | 3.378452169 | 2.875794438 |
| ENSMUSG00000066800 | -0.331020315 | 3.038248683  | 0.704535342 | 0.401263937 | 0.999071534 | Rnase1        | Rnase1        | RNASEL   | 13.12366627 | 12.39161928 | 5.654898509 | 7.354503294 | 8.436930446 | 13.82481069 | 9.060141087 | 4.835771668 | 4.16413872  | 4.248332693 |
| ENSMUSG00000040524 | -0.299143017 | 3.951922368  | 0.7044763   | 0.401283668 | 0.999071534 | Zfp609        | Zfp609        | ZNF609   | 18.17662869 | 28.39993127 | 11.2424768  | 13.66827499 | 16.74305577 | 28.52276732 | 8.348272859 | 16.78703593 | 6.992610304 | 9.150255031 |
| ENSMUSG00000031167 | 0.240764245  | 10.09282189  | 0.704134509 | 0.401397917 | 0.999071534 | Rbm3          | Rbm3          | RBM3     | 1100.001846 | 799.5855389 | 1296.587444 | 1108.30977  | 876.4597279 | 963.2982564 | 1630.63125  | 946.7750101 | 1092.340012 | 997.1817215 |
| ENSMUSG00000029802 | 0.294414228  | 3.552047942  | 0.704037518 | 0.401430346 | 0.999071534 | Abcg2         | Abcg2         | ABCG2    | 13.26402634 | 11.0872383  | 8.549667983 | 10.40731598 | 10.85682522 | 20.88274036 | 20.51474803 | 7.460904859 | 7.6997282   | 7.320204025 |
| ENSMUSG00000005698 | 0.17328839   | 5.803847153  | 0.703958806 | 0.401456667 | 0.999071534 | Ctcf          | Ctcf          | CTCF     | 45.8275619  | 50.98943819 | 56.81826597 | 52.79978308 | 65.53336672 | 76.54579392 | 59.02034765 | 55.40412682 | 50.83391985 | 45.22840344 |
| ENSMUSG00000055302 | -0.210339375 | 8.981409664  | 0.703404558 | 0.401642073 | 0.999071534 | Mrfap1        | Mrfap1        | MRFAP1   | 493.2252757 | 498.2735332 | 636.8492844 | 569.4883306 | 612.8220022 | 582.0972922 | 405.1177372 | 461.6089469 | 317.103092  | 526.2703822 |
| ENSMUSG00000029238 | 0.200708488  | 5.799456514  | 0.703246442 | 0.401694988 | 0.999071534 | Clock         | Clock         | CLOCK    | 36.00235721 | 54.36897072 | 72.70583797 | 53.21607572 | 51.34101085 | 59.44668596 | 44.39469133 | 60.30898094 | 61.75496291 | 56.60086326 |
| ENSMUSG00000017631 | -0.19462154  | 6.222272645  | 0.703231329 | 0.401700046 | 0.999071534 | Abr           | Abr           | ABR      | 87.44432179 | 109.8644523 | 71.02283246 | 60.70934323 | 85.80816081 | 91.82584784 | 45.23599014 | 76.68152216 | 57.7479615  | 66.4700669  |
| ENSMUSG00000036327 | 0.252926805  | 4.454440922  | 0.703199346 | 0.401710751 | 0.999071534 | Qsox2         | Qsox2         | QSOX2    | 26.66841275 | 20.21790514 | 15.48365068 | 19.56575405 | 21.51744277 | 32.74297269 | 35.52869612 | 11.81309936 | 21.13496822 | 14.57504908 |
| ENSMUSG00000009185 | -0.24490273  | 5.457161682  | 0.703144546 | 0.401729094 | 0.999071534 | Cc18          | Cc18          | CCL8     | 71.30291408 | 42.4516718  | 42.61369948 | 53.07731151 | 36.9524473  | 60.02878326 | 64.71529348 | 27.01123889 | 18.14935933 | 30.98014918 |
| ENSMUSG00000028029 | 0.193676569  | 6.847527313  | 0.703032161 | 0.401766716 | 0.999071534 | Aimp1         | Aimp1         | AIMP1    | 112.989854  | 103.5204175 | 125.6195312 | 102.8242819 | 112.3616008 | 106.8876153 | 147.8744456 | 94.78112468 | 107.4819202 | 129.9989804 |
| ENSMUSG00000027496 | 0.306758591  | 5.219369105  | 0.702741087 | 0.401864179 | 0.999071534 | Aurka         | Aurka         | AURKA    | 63.23221022 | 25.31684896 | 27.87057122 | 27.5446963  | 29.23494503 | 71.59796694 | 72.35169811 | 16.57978857 | 17.36367278 | 30.52263642 |
| ENSMUSG00000026999 | 0.226507205  | 5.029934715  | 0.702628234 | 0.401901976 | 0.999071534 | Nup35         | Nup35         | NUP35    | 38.94991862 | 33.32100496 | 23.62939734 | 28.16913526 | 32.04725518 | 38.63670777 | 60.5735147  | 24.31702324 | 21.68494881 | 26.60109855 |
| ENSMUSG00000038398 | -0.245546667 | 4.575105768  | 0.702552305 | 0.40192741  | 0.999071534 | Upf3a         | Upf3a         | UPF3A    | 29.54579412 | 35.27757642 | 21.67711095 | 17.48429085 | 30.41219114 | 44.02110772 | 18.24971276 | 19.06675686 | 11.07818037 | 17.77763835 |

|                     |              |              |             |             |             |          |          |              |             |             |             |             |             |             |             |             |             |             |
|---------------------|--------------|--------------|-------------|-------------|-------------|----------|----------|--------------|-------------|-------------|-------------|-------------|-------------|-------------|-------------|-------------|-------------|-------------|
| ENSMUSG00000029767  | -0.272414027 | 9.633453243  | 0.702502303 | 0.401944416 | 0.999071534 | Calu     | Calu     | CALU         | 984.0644303 | 1216.038811 | 698.6492467 | 812.7419961 | 807.3292203 | 1208.725027 | 1136.141692 | 388.7960421 | 377.7580937 | 510.5842307 |
| ENSMUSG000000081471 | 0.400323964  | 1.534765985  | 0.702415336 | 0.401973294 | 0.999071534 | Gm14735  | Gm14735  |              | 2.38612114  | 3.083082309 | 1.413724627 | 3.399723221 | 2.027479409 | 2.837724299 | 2.006174098 | 3.45412262  | 2.985608894 | 3.725460977 |
| ENSMUSG00000038895  | 0.367507508  | 2.459028063  | 0.702381184 | 0.401984737 | 0.999071534 | Zfp653   | Zfp653   | ZNF653       | 6.246022985 | 4.091013064 | 5.116336746 | 4.579219032 | 4.316569065 | 7.203453991 | 1.812028217 | 6.63191543  | 4.242707375 | 9.542408818 |
| ENSMUSG000000069208 | 0.31182376   | 4.371980843  | 0.702312011 | 0.402007914 | 0.999071534 | Zfp825   | Zfp825   | ZNF788       | 14.94834714 | 12.6880695  | 11.71371834 | 35.10734591 | 19.55536592 | 12.80614043 | 15.14337867 | 24.80060041 | 28.99183373 | 23.39850929 |
| ENSMUSG00000024911  | -0.182317118 | 5.49095079   | 0.701817727 | 0.402173585 | 0.999071534 | Fibp     | Fibp     | FIBP         | 57.61780754 | 42.4516718  | 54.12545715 | 49.46944197 | 43.62350858 | 43.29348611 | 42.00022547 | 44.55818179 | 25.77051887 | 48.75778752 |
| ENSMUSG00000025470  | 0.219541806  | 4.608638348  | 0.701665323 | 0.402224687 | 0.999071534 | Zfp511   | Zfp511   | ZNF511-PRAP1 | 21.1241901  | 18.37991377 | 26.65880726 | 23.58991623 | 26.48803745 | 20.59169171 | 21.03247038 | 29.49820717 | 26.9490487  | 25.03248341 |
| ENSMUSG00000022665  | 0.236888433  | 4.930163242  | 0.701488008 | 0.402284153 | 0.999071534 | Ccdc80   | Ccdc80   | CCDC80       | 30.10723439 | 39.42787953 | 30.89998114 | 21.64721724 | 23.02170168 | 50.71522658 | 49.96020657 | 24.59335305 | 15.94943698 | 23.26779136 |
| ENSMUSG00000024968  | -0.25592079  | 4.711123363  | 0.701397434 | 0.402314534 | 0.999071534 | Rcor2    | Rcor2    | RCOR2        | 25.68589228 | 45.65333419 | 22.35031315 | 18.59440456 | 35.97140888 | 31.43325378 | 16.50239984 | 34.12673148 | 10.6853709  | 24.70568858 |
| ENSMUSG00000052539  | -0.209980458 | 4.499166584  | 0.701173649 | 0.402389612 | 0.999071534 | Magi3    | Magi3    | MAGI3        | 23.58049127 | 27.62916069 | 28.1398521  | 16.65170557 | 29.75816553 | 26.41266463 | 15.27280926 | 21.07014798 | 19.64216377 | 18.30051006 |
| ENSMUSG00000024066  | -0.301802252 | 6.895614727  | 0.700809246 | 0.402511909 | 0.999071534 | Xdh      | Xdh      | XDH          | 107.6561715 | 215.9343417 | 93.84438716 | 103.9343956 | 163.6372091 | 77.20065338 | 43.6828231  | 197.7830612 | 70.161809   | 118.8225975 |
| ENSMUSG00000034190  | -0.18161849  | 5.503390182  | 0.700790689 | 0.402518139 | 0.999071534 | Chmp7    | Chmp7    | CHMP7        | 52.35430502 | 62.66957694 | 42.61369948 | 39.27027231 | 53.63010051 | 56.75448599 | 34.42853613 | 45.87074839 | 27.65616659 | 43.4637114  |
| ENSMUSG00000027835  | 0.234682449  | 6.123557766  | 0.700749794 | 0.402531867 | 0.999071534 | Pdcd10   | Pdcd10   | PDCD10       | 79.23325787 | 71.20734333 | 54.9332998  | 68.61890338 | 57.81586445 | 60.24706974 | 140.1086104 | 58.44375473 | 45.09840803 | 60.5877601  |
| ENSMUSG00000040174  | -0.208589599 | 4.56938373   | 0.700242167 | 0.402702335 | 0.999071534 | Alkbh3   | Alkbh3   | ALKBH3       | 21.61545033 | 26.73981003 | 28.81305431 | 26.78149313 | 27.20746562 | 16.95358363 | 23.62108212 | 22.79720929 | 19.17075184 | 21.63381725 |
| ENSMUSG00000097423  | -0.734976132 | -0.340077976 | 0.700160943 | 0.40272962  | 0.999071534 | Gm26522  | Gm26522  |              | 0.280720134 | 0.5336104   | 0.875162864 | 2.01028109  | 0.457817931 | 1.091432423 | 0.064715293 | 0.138164905 | 0.392843275 | 0.784307574 |
| ENSMUSG00000078484  | 0.23236236   | 4.086922936  | 0.700069891 | 0.402760211 | 0.999071534 | Klhl17   | Klhl17   | KLHL17       | 18.94860906 | 15.00038123 | 13.59868451 | 12.07248654 | 21.32123508 | 17.75396741 | 12.81362811 | 20.310241   | 14.6923385  | 21.96061207 |
| ENSMUSG00000020003  | 0.225166938  | 4.434921821  | 0.699917692 | 0.402811352 | 0.999071534 | Pex7     | Pex7     | PEX7         | 30.03705436 | 19.86216488 | 15.887572   | 19.63513615 | 17.65869163 | 19.20921064 | 31.06334087 | 20.10299365 | 18.93504588 | 21.63381725 |
| ENSMUSG00000014748  | -0.247752034 | 5.670190327  | 0.699842407 | 0.402836653 | 0.999071534 | Tex261   | Tex261   | TEX261       | 70.10985351 | 65.87123934 | 43.3542219  | 55.50568524 | 51.73342622 | 88.26050193 | 67.4980511  | 22.86629174 | 24.27771443 | 32.74484122 |
| ENSMUSG00000030816  | -0.189683602 | 5.365359566  | 0.699472564 | 0.402960977 | 0.999071534 | Rnf40    | Rnf40    | RNF40        | 40.91495955 | 48.08422601 | 50.75944614 | 39.89471127 | 47.94007765 | 61.48402649 | 28.92773619 | 37.37360675 | 21.99922343 | 41.50294246 |
| ENSMUSG00000029378  | 0.242679825  | 6.750940799  | 0.699210614 | 0.403049067 | 0.999071534 | Areg     | Areg     | AREG         | 102.3926689 | 170.5774578 | 91.42085922 | 66.53744018 | 83.25746091 | 102.2308369 | 148.9098903 | 152.2577251 | 82.26138189 | 75.03209125 |
| ENSMUSG00000026639  | 0.206002864  | 5.289123419  | 0.699128565 | 0.403076664 | 0.999071534 | Lamb3    | Lamb3    | LAMB3        | 44.07306106 | 36.10763704 | 39.0457278  | 35.10734591 | 33.68231922 | 39.29156722 | 40.83535019 | 53.33165325 | 19.09218319 | 51.17606921 |
| ENSMUSG00000028677  | -0.204294719 | 4.950224874  | 0.69912502  | 0.403077856 | 0.999071534 | Rnf220   | Rnf220   | RNF220       | 35.72163707 | 27.09555029 | 46.72023292 | 29.41801318 | 32.24346287 | 42.9296753  | 22.00319978 | 22.31363212 | 19.56359512 | 34.57489222 |
| ENSMUSG00000026155  | 0.270406275  | 6.501623063  | 0.698619554 | 0.403247933 | 0.999071534 | Smap1    | Smap1    | SMAP1        | 52.28412499 | 67.35349045 | 117.6757452 | 102.5467535 | 83.19205835 | 65.92251834 | 48.86004658 | 111.0845834 | 118.4815319 | 115.1624955 |
| ENSMUSG00000059263  | -0.191841599 | 6.745037087  | 0.69854057  | 0.403274519 | 0.999071534 | Usp47    | Usp47    | USP47        | 107.9368916 | 141.466046  | 115.184897  | 98.80011973 | 131.1975386 | 154.8378797 | 73.06356634 | 100.8603805 | 70.08324035 | 95.35872921 |
| ENSMUSG00000034457  | 0.326308517  | 3.262575027  | 0.698416581 | 0.403316258 | 0.999071534 | Eda2r    | Eda2r    | EDA2R        | 10.94808523 | 7.292675462 | 6.328100712 | 7.285121188 | 11.96866877 | 10.55051342 | 17.08483748 | 6.839162787 | 11.15674902 | 4.64048648  |
| ENSMUSG00000037210  | 0.241640188  | 4.618401678  | 0.698328103 | 0.403346047 | 0.999071534 | Fam193a  | Fam193a  | FAM193A      | 18.17662869 | 24.54607838 | 22.21567271 | 18.87193298 | 32.83208592 | 32.67021052 | 13.07248928 | 34.5412262  | 17.20653547 | 31.76445675 |
| ENSMUSG00000059534  | 0.23601915   | 7.141722724  | 0.698169712 | 0.403399382 | 0.999071534 | Uqcr10   | Uqcr10   | UQCRI10      | 170.8883817 | 99.31082438 | 118.0796665 | 150.9060817 | 132.3747847 | 121.9493827 | 225.7916589 | 94.71204223 | 126.652672  | 161.5673603 |
| ENSMUSG00000039480  | 0.270744157  | 3.932326358  | 0.698107465 | 0.403420345 | 0.999071534 | Nt5dc1   | Nt5dc1   | NT5DC1       | 14.10618674 | 14.22961066 | 10.9058757  | 17.06799821 | 14.71557636 | 19.50025929 | 27.95700678 | 8.289894287 | 9.663944577 | 16.07830527 |
| ENSMUSG00000093023  | 0.557326044  | 1.871698398  | 0.697759146 | 0.40353768  | 0.999071534 | Gm25304  | Gm27826  |              | 1.543960738 | 0.592900444 | 3.164050356 | 7.909560147 | 1.24264867  | 2.619437815 | 1.100159989 | 4.62852431  | 6.756904338 | 4.117614764 |
| ENSMUSG00000018821  | 0.241020643  | 6.160591742  | 0.697569391 | 0.403601621 | 0.999071534 | Avpl1    | Avpl1    | AVP1         | 100.5679881 | 41.85877135 | 58.09735015 | 74.30823611 | 64.74853598 | 48.9689347  | 106.5860884 | 64.10851582 | 77.54726258 | 66.79686172 |
| ENSMUSG00000026790  | -0.188269927 | 5.096494888  | 0.697543428 | 0.403610371 | 0.999071534 | Odf2     | Odf2     | ODF2         | 35.23037684 | 44.94185366 | 34.93919436 | 36.77251647 | 36.56003193 | 53.3346644  | 27.95700678 | 27.4257336  | 21.60638015 | 28.1697137  |
| ENSMUSG00000069899  | 0.25173165   | 4.992878355  | 0.697300761 | 0.403692167 | 0.999071534 | Gm12166  | Gm12166  | SFT2D1       | 23.8612114  | 18.37991377 | 39.85357044 | 38.64583335 | 28.45011429 | 26.12161599 | 28.15115266 | 24.04069343 | 43.29132896 | 39.28073767 |
| ENSMUSG000000002428 | 0.192441113  | 5.504456032  | 0.696988153 | 0.403797573 | 0.999071534 | Hltf     | Hltf     | HLTF         | 41.40621979 | 41.32516095 | 43.89278366 | 35.93993119 | 57.42344908 | 44.8214915  | 37.40543963 | 45.59441858 | 52.79813623 | 47.77740305 |
| ENSMUSG00000095440  | 0.439625263  | 1.921558991  | 0.696969029 | 0.403804022 | 0.999071534 | Figl2    | Figl2    | FIGL2        | 2.245761073 | 5.751134307 | 3.298690797 | 1.873316877 | 3.008517833 | 1.673529715 | 2.006174098 | 7.046410144 | 3.378452169 | 5.620870947 |
| ENSMUSG000000086382 | -0.499611864 | 1.117686935  | 0.69671579  | 0.403889442 | 0.999071534 | Gm13705  | Chrna1os |              | 3.228281543 | 2.668051998 | 0.875162864 | 4.371072713 | 1.111843547 | 1.091432423 | 2.329750565 | 1.72706131  | 1.964216377 | 0.784307574 |
| ENSMUSG00000042333  | -0.394589641 | 1.605904138  | 0.696635551 | 0.403916512 | 0.999071534 | Tnfrsf14 | Tnfrsf14 | TNFRSF14     | 5.403862583 | 3.320242487 | 4.375814322 | 1.80393477  | 2.354492217 | 3.34705943  | 2.78275762  | 1.657978857 | 1.728510412 | 2.810435474 |
| ENSMUSG00000066877  | -0.192261323 | 5.23794413   | 0.696546497 | 0.40394656  | 0.999071534 | Nck2     | Nck2     | NCK2         | 34.59875654 | 37.1155678  | 40.32481198 | 43.71072713 | 52.25664672 | 38.27289696 | 25.69197151 | 43.93643972 | 27.89187256 | 33.52914879 |
| ENSMUSG00000049871  | 0.295650094  | 3.35941117   | 0.69643896  | 0.403982849 | 0.999071534 | Nlrc3    | Nlrc3    | NLRC3        | 10.17610486 | 6.166164618 | 9.963392611 | 11.86434022 | 8.829345815 | 12.07851881 | 5.436084652 | 9.878790692 | 12.41384751 | 13.33322876 |
| ENSMUSG00000031446  | 0.172794955  | 6.624004864  | 0.696432322 | 0.403985089 | 0.999071534 | Cul4a    | Cul4a    | CUL4A        | 103.6559095 | 99.42940447 | 92.02674121 | 81.5239752  | 105.4289293 | 126.1695881 | 115.9050906 | 85.93857078 | 81.47569534 | 98.62667744 |
| ENSMUSG00000020027  | 0.342736521  | 3.035830601  | 0.696321038 | 0.404022647 | 0.999071534 | Socs2    | Socs2    | SOCS2        | 6.947823321 | 5.51397413  | 14.00260583 | 6.799446442 | 3.531738326 | 8.804221544 | 6.083237587 | 7.668152216 | 10.68533709 | 9.411690889 |

|                    |              |              |             |             |             |               |               |               |             |             |             |             |             |             |             |             |             |             |
|--------------------|--------------|--------------|-------------|-------------|-------------|---------------|---------------|---------------|-------------|-------------|-------------|-------------|-------------|-------------|-------------|-------------|-------------|-------------|
| ENSMUSG00000032766 | -0.214246439 | 7.075652113  | 0.696079361 | 0.40410423  | 0.999071534 | Gng11         | Gng11         | GNG11         | 146.7464501 | 136.3078121 | 148.7103667 | 195.3106299 | 119.49048   | 108.3428585 | 117.7818341 | 100.5149682 | 121.6242781 | 144.8354653 |
| ENSMUSG00000024639 | 0.291487738  | 6.315732518  | 0.695359062 | 0.404347525 | 0.999071534 | Gnaq          | Gnaq          | GNAQ          | 39.16045872 | 51.34517846 | 106.4332684 | 91.37623433 | 80.3797482  | 67.30499941 | 36.04641847 | 93.39947564 | 117.8529826 | 90.45680687 |
| ENSMUSG00000032386 | 0.195135883  | 5.310491232  | 0.695081507 | 0.404441331 | 0.999071534 | Trip4         | Trip4         | TRIP4         | 39.86225905 | 37.58988815 | 40.45945243 | 38.71521545 | 34.53255252 | 41.40166991 | 28.92773619 | 37.51177165 | 48.00544826 | 43.92122415 |
| ENSMUSG00000046201 | -0.209246499 | 4.886332455  | 0.695039596 | 0.404455498 | 0.999071534 | Scaf8         | Scaf8         | SCAF8         | 27.51057315 | 44.34895322 | 26.99540836 | 25.53261521 | 40.15717282 | 35.87174563 | 23.815228   | 33.78131922 | 20.74212495 | 18.95409971 |
| ENSMUSG00000040270 | -0.390585399 | 2.029340928  | 0.694996702 | 0.404469999 | 0.999071534 | Bach2         | Bach2         | BACH2         | 2.245761073 | 3.320242487 | 7.674505119 | 4.926129565 | 4.970594681 | 3.638108076 | 2.523896446 | 5.526596192 | 2.278490998 | 2.548999616 |
| ENSMUSG00000042507 | -0.236700988 | 4.39769781   | 0.694994585 | 0.404470715 | 0.999071534 | Elmsan1       | Elmsan1       | ELMSAN1       | 16.35194782 | 31.00869322 | 23.1581558  | 20.88401407 | 26.35723232 | 30.12353487 | 17.40841395 | 24.24794079 | 9.035395336 | 15.16327977 |
| ENSMUSG00000078134 | 0.746517649  | 0.087237753  | 0.694772633 | 0.40454576  | 0.999071534 | Gm12355       | Gm12355       |               | 0.912340436 | 0.415030311 | 0.605881983 | 1.318260024 | 0.261610246 | 2.619437815 | 2.588611739 | 0.27632981  | 0           | 0.588230681 |
| ENSMUSG00000086591 | -0.768701015 | 0.289232582  | 0.694557299 | 0.404618586 | 0.999071534 | 6030455H03Rik | Dnah2os       |               | 2.17558104  | 1.541541155 | 1.817645949 | 0           | 1.63506404  | 0.291048646 | 1.617882337 | 1.105319238 | 0           | 0.849666539 |
| ENSMUSG00000059820 | 0.211127284  | 4.108974976  | 0.694143389 | 0.404758626 | 0.999071534 | AU019823      | AU019823      | C11orf57      | 18.10644865 | 19.26926443 | 16.2241731  | 14.50086027 | 14.38856355 | 21.61036197 | 21.22661626 | 15.40538688 | 15.24231909 | 15.62079252 |
| ENSMUSG00000066042 | 0.383933422  | 2.757150911  | 0.693997136 | 0.404808125 | 0.999071534 | Med18         | Med18         | MED18         | 11.0884453  | 6.403324796 | 1.95228639  | 4.02416218  | 6.671061283 | 9.895653967 | 12.49005164 | 3.661369977 | 5.106962581 | 5.816947841 |
| ENSMUSG00000039018 | -0.333181731 | 3.144258813  | 0.693540459 | 0.404962744 | 0.999071534 | Mtg1          | Mtg1          | RP11-108K14.8 | 13.47456644 | 7.766995817 | 9.626791509 | 10.5460802  | 8.960150939 | 13.09718907 | 13.13720458 | 3.592287524 | 4.085570065 | 4.836563373 |
| ENSMUSG00000047810 | -0.259015948 | 4.076435996  | 0.693000989 | 0.405145505 | 0.999071534 | Ccdc88b       | Ccdc88b       | CCDC88B       | 24.77355184 | 17.54985314 | 16.49345398 | 16.929234   | 19.16295055 | 24.44808627 | 7.44225875  | 11.05319238 | 10.68533709 | 21.89525311 |
| ENSMUSG00000097364 | 0.851211246  | -0.537229161 | 0.692558871 | 0.405295375 | 0.999071534 | Gm26719       | Gm26719       |               | 0.631620302 | 0           | 1.077123525 | 0.277528426 | 0.130805123 | 0.654859454 | 0.064715293 | 0.690824524 | 1.492804447 | 0.457512752 |
| ENSMUSG00000047777 | -0.240753981 | 4.415941486  | 0.692506476 | 0.405313141 | 0.999071534 | Phf13         | Phf13         | PHF13         | 27.93165335 | 27.5105806  | 19.59018412 | 23.24300569 | 21.1250274  | 30.26905919 | 21.8090539  | 21.69189005 | 6.599767028 | 17.38548456 |
| ENSMUSG00000040732 | -0.368850317 | 2.398313376  | 0.692217962 | 0.405410993 | 0.999071534 | Erg           | Erg           | ERG           | 7.158363421 | 7.885575906 | 6.597381593 | 2.636520049 | 6.017035667 | 9.968416129 | 3.624056435 | 2.417885834 | 3.457020824 | 3.202589261 |
| ENSMUSG00000032534 | -0.219177171 | 3.945753295  | 0.692099978 | 0.405451018 | 0.999071534 | Cep63         | Cep63         | CEP63         | 16.14140771 | 19.20997439 | 14.00260583 | 18.87193298 | 16.93926345 | 18.11777822 | 15.66110102 | 12.36575898 | 9.585375922 | 13.46394669 |
| ENSMUSG00000078153 | 0.639061585  | 2.722885267  | 0.691391119 | 0.405691612 | 0.999071534 | Psme2b        | Psme2b        | PSME2         | 9.544484562 | 5.751134307 | 4.106533441 | 0           | 7.325086899 | 18.26330254 | 10.03087049 | 8.497141644 | 0.471411931 | 3.986896835 |
| ENSMUSG00000048521 | -0.497171241 | 1.019414256  | 0.691345728 | 0.405707026 | 0.999071534 | Cxcr6         | Cxcr6         | CXCR6         | 4.000261912 | 2.668051998 | 1.95228639  | 0.901967385 | 2.092881971 | 3.492583753 | 0.647152935 | 0.967154334 | 1.885647722 | 0.784307574 |
| ENSMUSG00000052423 | -0.241330511 | 4.27506762   | 0.691319673 | 0.405715874 | 0.999071534 | B4galt3       | B4galt3       | B4GALT3       | 29.68615419 | 21.10725581 | 22.61959403 | 15.40282765 | 19.88237873 | 30.85115649 | 21.42076214 | 14.85272726 | 8.406846095 | 13.26786979 |
| ENSMUSG00000001127 | 0.180210377  | 6.130852543  | 0.69131112  | 0.405718778 | 0.999071534 | Araf          | Araf          | ARAF          | 77.12785686 | 55.43619152 | 71.29211334 | 66.25991175 | 70.37315628 | 63.59412917 | 72.54584399 | 70.04960673 | 65.29055239 | 83.07124389 |
| ENSMUSG00000029821 | 0.269410293  | 4.221390383  | 0.691286413 | 0.405727168 | 0.999071534 | Dfna5         | Dfna5         | DFNA5         | 11.2989854  | 11.6208487  | 22.28299293 | 22.89609516 | 18.44352237 | 15.86215121 | 17.14955277 | 14.3691501  | 25.3776756  | 21.89525311 |
| ENSMUSG00000054836 | -0.232201083 | 3.759194067  | 0.69105006  | 0.405807446 | 0.999071534 | Elp6          | Elp6          | ELP6          | 17.33446828 | 11.85800888 | 13.93528561 | 17.83120138 | 13.99614818 | 16.88082147 | 11.97232929 | 10.84594503 | 10.05678785 | 10.45743432 |
| ENSMUSG00000028789 | -0.205926229 | 4.828606812  | 0.690971427 | 0.405834159 | 0.999071534 | Adin2         | Adin2         | AZIN2         | 31.86173523 | 30.41579278 | 36.95880097 | 25.81014364 | 32.50507311 | 24.88465924 | 18.57328923 | 36.68278222 | 21.37067419 | 24.24817583 |
| ENSMUSG00000041438 | 0.220502798  | 5.177731795  | 0.690870432 | 0.405868472 | 0.999071534 | Cirh1a        | Cirh1a        | UTP4          | 32.4231755  | 40.49510033 | 34.19867193 | 26.78149313 | 39.69935489 | 68.54195615 | 52.16052654 | 27.08032134 | 19.87786974 | 28.10435474 |
| ENSMUSG00000036960 | -0.380658063 | 2.17461075   | 0.690452794 | 0.406010411 | 0.999071534 | Ckca5         | Ckca2         | CLCA2         | 5.333682549 | 9.54569715  | 1.817645949 | 3.954780073 | 5.166802366 | 4.947826984 | 4.206494076 | 3.385040167 | 3.378452169 | 2.548999616 |
| ENSMUSG00000022940 | 0.263280188  | 4.007469661  | 0.690108248 | 0.406127564 | 0.999071534 | Pigp          | Pigp          | PIGP          | 11.43934547 | 14.8225111  | 13.80064517 | 21.78598146 | 12.75349951 | 10.62327558 | 18.31442805 | 21.34647779 | 15.55659371 | 16.2090232  |
| ENSMUSG00000091993 | 0.59201613   | 1.301197372  | 0.690006429 | 0.406162194 | 0.999071534 | B930036N10Rik | B930036N10Rik |               | 1.263240604 | 0.474320355 | 2.558168373 | 4.717983245 | 0.457817931 | 0.873145938 | 1.229590576 | 2.003391119 | 4.478413341 | 4.182973728 |
| ENSMUSG00000090305 | -0.756090291 | -0.221239535 | 0.689969097 | 0.406174892 | 0.999071534 | Gm5459        | Gm5459        |               | 1.333420637 | 1.067220799 | 0.269280881 | 0.069382107 | 2.027479409 | 0.509335131 | 1.294305087 | 0.483577167 | 0.235705965 | 0.065358965 |
| ENSMUSG00000030499 | -0.213765025 | 4.543551648  | 0.689539356 | 0.406321107 | 0.999071534 | Kctd15        | Kctd15        | KCTD15        | 19.72058943 | 34.21035562 | 22.21567271 | 21.92474567 | 31.52403469 | 29.61419974 | 15.98467749 | 23.211704   | 14.61376985 | 22.02597104 |
| ENSMUSG00000032239 | 0.310142847  | 4.475812911  | 0.689479046 | 0.406341633 | 0.999071534 | Rp9           | Rp9           | RP9           | 12.00078574 | 13.87387039 | 28.54377342 | 28.23851737 | 18.9013403  | 14.04309717 | 11.71346812 | 27.97839322 | 32.84169783 | 25.94750891 |
| ENSMUSG00000028567 | -0.187861774 | 5.629696358  | 0.689264117 | 0.406414795 | 0.999071534 | Txndc12       | Txndc12       | TXNDC12       | 71.93453438 | 52.70884948 | 48.53787887 | 48.7062388  | 51.79882878 | 53.18914007 | 64.5211476  | 40.20598729 | 26.2419308  | 42.8832693  |
| ENSMUSG00000024892 | 0.378555638  | 2.485640423  | 0.689120694 | 0.406463626 | 0.999071534 | Pcx           | Pcx           | PC            | 7.158363421 | 8.004155995 | 2.962089695 | 1.387642131 | 5.493815174 | 7.567264798 | 7.248111287 | 6.424668073 | 4.949825271 | 3.856178906 |
| ENSMUSG00000050945 | -0.433163344 | 1.231293681  | 0.688922246 | 0.406531207 | 0.999071534 | Zfp438        | Zfp438        | ZNF438        | 2.035220973 | 3.379532531 | 1.683005509 | 3.122194795 | 2.943115272 | 1.600767553 | 1.229590576 | 1.796143762 | 2.828471584 | 1.30717929  |
| ENSMUSG00000036931 | -0.472514186 | 1.482462898  | 0.688669469 | 0.406617313 | 0.999071534 | Nfkbid        | Nfkbid        | NFKBID        | 7.789983723 | 1.422961066 | 2.962089695 | 1.80393477  | 2.223687094 | 3.056010784 | 1.747312924 | 0.967154334 | 1.414235792 | 3.790819941 |
| ENSMUSG00000033287 | -0.482602897 | 4.566761847  | 0.688444417 | 0.406693997 | 0.999071534 | Kctd17        | Kctd17        | KCTD17        | 49.89800385 | 48.02493597 | 13.46404407 | 8.672763319 | 24.5259606  | 57.11829679 | 30.93391028 | 7.460904859 | 2.121353688 | 7.908434705 |
| ENSMUSG00000097891 | 0.317634253  | 3.81745651   | 0.688163726 | 0.406789669 | 0.999071534 | Gm3650        | Gm3650        |               | 11.5095255  | 9.723567283 | 14.8777687  | 13.32136446 | 15.04258917 | 8.222124252 | 6.471529348 | 18.09960253 | 13.27810271 | 26.86253441 |
| ENSMUSG00000062822 | 0.2341542    | 5.482022588  | 0.687932577 | 0.406868479 | 0.999071534 | 4833420G17Rik | 4833420G17Rik | C5orf34       | 37.82703808 | 34.09177553 | 35.67971678 | 57.72591265 | 45.9780008  | 37.54527535 | 25.88611739 | 54.92054965 | 49.81252733 | 58.62699116 |
| ENSMUSG00000033943 | 0.181999596  | 5.036325067  | 0.687519791 | 0.407009275 | 0.999071534 | Mga           | Mga           | MGA           | 27.65093322 | 36.70053749 | 33.72743039 | 29.00172054 | 31.91645006 | 36.38108076 | 26.7921315  | 37.02819448 | 29.62038297 | 37.25460977 |
| ENSMUSG00000029647 | 0.224498189  | 5.540385302  | 0.687494583 | 0.407017875 | 0.999071534 | Pan3          | Pan3          | PAN3          | 35.37073691 | 39.96148993 | 48.53787887 | 48.42871037 | 49.31353144 | 38.70946993 | 27.8275762  | 71.84575049 | 46.82691844 | 50.91463335 |

|                     |              |              |             |             |             |               |               |              |             |             |             |             |             |             |             |             |             |             |
|---------------------|--------------|--------------|-------------|-------------|-------------|---------------|---------------|--------------|-------------|-------------|-------------|-------------|-------------|-------------|-------------|-------------|-------------|-------------|
| ENSMUSG00000027634  | -0.25889001  | 3.97819511   | 0.687485185 | 0.407021082 | 0.999071534 | NdrG3         | NdrG3         | NDRG3        | 19.22932919 | 27.09555029 | 12.2522801  | 10.89299073 | 19.55536592 | 18.19054038 | 19.09101158 | 13.19474841 | 7.542590889 | 12.22212636 |
| ENSMUSG00000042793  | -0.248774514 | 4.700155541  | 0.68734524  | 0.407068834 | 0.999071534 | Lgr6          | Lgr6          | LGR6         | 28.56327365 | 13.99245048 | 34.66991348 | 28.16913526 | 40.48418563 | 27.7951457  | 19.47930334 | 13.40199576 | 24.6705577  | 28.1697137  |
| ENSMUSG00000027956  | 0.552504781  | 0.325837773  | 0.687282454 | 0.40709026  | 0.999071534 | Tmem144       | Tmem144       | TMEM144      | 1.754500839 | 0.770770577 | 0.538561763 | 1.110113705 | 0.523220493 | 2.764962138 | 1.553167044 | 1.243484143 | 0.392843275 | 0.849666539 |
| ENSMUSG00000025451  | 0.238112201  | 7.383589633  | 0.687279538 | 0.407091255 | 0.999071534 | Paip1         | Paip1         | PAIP1        | 119.235877  | 137.8493532 | 179.0044659 | 173.7327948 | 182.8655622 | 145.3060366 | 127.2949823 | 201.4444312 | 218.2637239 | 150.913849  |
| ENSMUSG00000058254  | 0.339490119  | 3.298096244  | 0.687196013 | 0.407119761 | 0.999071534 | Tspan7        | Tspan7        | RPS-972B16.2 | 9.333944461 | 9.782857327 | 13.19476319 | 3.538487434 | 8.960150939 | 15.71662689 | 13.8490728  | 4.214029596 | 5.499805857 | 14.83648494 |
| ENSMUSG00000056267  | 0.290215725  | 3.424334917  | 0.687083675 | 0.407158106 | 0.999071534 | Cep70         | Cep70         | CEP70        | 7.018003354 | 10.0200175  | 12.99280253 | 9.574730704 | 9.810384239 | 8.731459383 | 10.09558578 | 9.049801264 | 15.71373102 | 10.65351121 |
| ENSMUSG00000041769  | 0.190967058  | 5.588608881  | 0.686803446 | 0.40725378  | 0.999071534 | Ppp2r2d       | Ppp2r2d       | PPP2R2D      | 54.67024613 | 55.6733517  | 35.67971678 | 42.11493868 | 45.06236494 | 64.75832375 | 72.02812164 | 42.48570822 | 32.60599187 | 39.60753249 |
| ENSMUSG00000090273  | 0.748958014  | -0.140779274 | 0.686744085 | 0.407274051 | 0.999071534 | Prr22         | Prr22         | PRR22        | 0.140360067 | 0.059290044 | 1.009803305 | 0.971349492 | 0.784830739 | 1.746291877 | 0.064715293 | 0.552659619 | 0.785686551 | 1.699333077 |
| ENSMUSG00000096916  | 0.433075751  | 1.56813739   | 0.686652818 | 0.40730522  | 0.999071534 | Zfp850        | Zfp850        | ZNF780B      | 3.298461576 | 2.430891821 | 2.221567271 | 1.526406344 | 3.139322957 | 4.511254014 | 4.206494076 | 0.759906976 | 3.8498641   | 2.418281687 |
| ENSMUSG00000021054  | 0.184517391  | 6.164032728  | 0.686517613 | 0.407351401 | 0.999071534 | Sgpp1         | Sgpp1         | SGPP1        | 57.19672734 | 61.54306609 | 77.21629273 | 74.30823611 | 76.78260731 | 67.52328589 | 83.15915212 | 83.79701475 | 65.29055239 | 64.05178521 |
| ENSMUSG00000039244  | 0.229897041  | 4.272964144  | 0.686205161 | 0.407458153 | 0.999071534 | E130309D02Rik | E130309D02Rik | C7orf26      | 21.47509026 | 18.61707394 | 20.1960661  | 15.40282765 | 16.21983528 | 32.08811323 | 24.07408917 | 11.74401691 | 18.85647722 | 14.96720287 |
| ENSMUSG00000063179  | 0.229503537  | 4.410081572  | 0.68608023  | 0.407500848 | 0.999071534 | Pstk          | Pstk          | PSTK         | 24.91391191 | 16.48263235 | 22.61959403 | 21.43907092 | 15.30419941 | 19.2819728  | 33.91081378 | 18.30684988 | 19.09218319 | 18.62730488 |
| ENSMUSG00000029863  | -0.203091644 | 4.583079945  | 0.686057242 | 0.407508705 | 0.999071534 | Casp2         | Casp2         | CASP2        | 23.93139144 | 27.03626025 | 28.88037453 | 21.50845303 | 31.45863213 | 34.70755105 | 18.8968657  | 20.1720761  | 13.35667137 | 23.00635551 |
| ENSMUSG00000066880  | 0.204426556  | 4.740009104  | 0.685992323 | 0.407530895 | 0.999071534 | Zfp617        | Zfp617        |              | 26.31751258 | 30.41579278 | 25.51436351 | 20.74524986 | 25.57240158 | 25.03018356 | 33.13423026 | 29.70545453 | 27.65616659 | 19.80376624 |
| ENSMUSG00000067916  | 0.275608109  | 4.446370411  | 0.685899525 | 0.407562616 | 0.999071534 | Gm13139       | Gm13139       |              | 18.80824899 | 9.486407105 | 29.14965541 | 23.38176991 | 20.47100178 | 19.2819728  | 19.41458804 | 17.68510781 | 32.68456052 | 21.24166346 |
| ENSMUSG00000018927  | -0.348486553 | 5.901831397  | 0.685830291 | 0.407586285 | 0.999071534 | Cc16          | Cc16          | CCL23        | 115.025075  | 96.46490225 | 38.17056493 | 53.28545783 | 45.84719568 | 47.00435634 | 121.5353212 | 44.48909934 | 11.39245499 | 35.88207151 |
| ENSMUSG00000020687  | 0.181599716  | 6.013052517  | 0.685602564 | 0.407664151 | 0.999071534 | Cdc27         | Cdc27         | CD27         | 50.52962415 | 69.36935196 | 58.29931082 | 59.04417267 | 76.58639963 | 81.4936209  | 69.76308637 | 79.85931497 | 52.3267243  | 49.14994131 |
| ENSMUSG00000020926  | 0.746540815  | -0.285274332 | 0.685547532 | 0.407682972 | 0.999071534 | Adam11        | Adam11        | ADAM11       | 1.473780704 | 0.415030311 | 0.134640441 | 0.20814632  | 0.523220493 | 0.582097292 | 0.970729402 | 0.069082452 | 1.728510412 | 0.653589645 |
| ENSMUSG00000023118  | -0.188283284 | 6.406739191  | 0.685400057 | 0.407733413 | 0.999071534 | Sympk         | Sympk         | SYMPK        | 101.9715887 | 96.76135247 | 94.11366804 | 82.70347101 | 93.59106564 | 114.3821179 | 50.08963715 | 64.03943337 | 72.59743731 | 84.83593593 |
| ENSMUSG00000033735  | -0.271658922 | 5.406410965  | 0.685193582 | 0.407804049 | 0.999071534 | Spr           | Spr           | SPR          | 72.21525451 | 41.79948131 | 50.01892371 | 34.20537853 | 43.10028809 | 74.07188043 | 56.75531238 | 17.20153065 | 15.24231909 | 32.61412329 |
| ENSMUSG00000034308  | 0.771052787  | -0.029152829 | 0.684981554 | 0.407876604 | 0.999071534 | Sdr42e1       | Sdr42e1       | SDR42E1      | 0.912340436 | 0.948640711 | 0           | 0.693821065 | 0.654025616 | 1.600767553 | 1.359021163 | 0.483577167 | 0           | 1.960768935 |
| ENSMUSG00000036030  | 0.364305255  | 2.206659573  | 0.684736461 | 0.407960496 | 0.999071534 | Prtg          | Prtg          | PRTG         | 3.789721811 | 4.150303108 | 4.443134543 | 3.191576901 | 4.839789558 | 2.837724299 | 3.300479967 | 4.214029596 | 4.792687961 | 8.627383315 |
| ENSMUSG00000020424  | -0.365776061 | 3.118750876  | 0.684366756 | 0.408087091 | 0.999071534 | Gatsl3        | Gatsl3        | GATSL3       | 15.15888725 | 13.28096995 | 9.357510628 | 4.648601139 | 7.979112515 | 11.86023233 | 13.52549634 | 3.937699786 | 2.435628308 | 6.013024734 |
| ENSMUSG00000022476  | 0.213028209  | 5.178338133  | 0.68431882  | 0.408103509 | 0.999071534 | Polr3h        | Polr3h        | POLR3H       | 43.7221609  | 29.88218238 | 35.0738348  | 26.36520049 | 39.24153696 | 41.54719423 | 50.02492186 | 19.20492177 | 32.21314859 | 44.57481379 |
| ENSMUSG00000021276  | 0.246480139  | 4.708812268  | 0.684195029 | 0.408145913 | 0.999071534 | Cinp          | Cinp          | CINP         | 35.93217717 | 19.44713457 | 20.39802676 | 20.74524986 | 27.59988099 | 40.74681045 | 45.75371249 | 16.99428329 | 18.30649664 | 18.10443317 |
| ENSMUSG000000005370 | 0.181527045  | 5.76779668   | 0.683509129 | 0.408380981 | 0.999071534 | Msh6          | Msh6          | MSH6         | 52.91574529 | 45.83120433 | 52.44245165 | 53.42422204 | 59.7779413  | 87.31459383 | 56.17287474 | 35.02480336 | 47.29833037 | 58.43091427 |
| ENSMUSG00000025200  | -0.273762014 | 3.401639867  | 0.683224333 | 0.408478643 | 0.999071534 | Cwf19l1       | Cwf19l1       | CWF19L1      | 10.38664496 | 7.233385418 | 16.42613376 | 13.59889288 | 11.38004572 | 13.46099988 | 9.901439902 | 8.773471454 | 6.992610304 | 7.25484506  |
| ENSMUSG00000039137  | -0.55381329  | 1.223090372  | 0.683167783 | 0.408498039 | 0.999071534 | Whrn          | Whrn          | WHRN         | 1.052700503 | 3.735272798 | 4.577774983 | 0.624438959 | 3.662543449 | 1.309718907 | 0.970729402 | 4.006782239 | 0.31427462  | 2.0261279   |
| ENSMUSG00000060034  | 0.875579903  | 0.642817729  | 0.68301142  | 0.408551677 | 0.999071534 | Ctf2          | Ctf2          |              | 0.210540101 | 0.118580089 | 3.769932339 | 0           | 1.308051232 | 0.363810808 | 0.19414588  | 1.588896405 | 5.264099892 | 0.588230681 |
| ENSMUSG00000060726  | -0.579751004 | 3.067921424  | 0.682948792 | 0.408573164 | 0.999071534 | Tmsb15a       | Tmsb15a       | TMSB15B      | 26.38769261 | 10.67220799 | 5.452937848 | 7.84017804  | 1.308051232 | 1.964578361 | 0.517722348 | 13.81649048 | 6.678335683 | 7.385562989 |
| ENSMUSG000000051223 | 0.225857878  | 8.418640391  | 0.682859534 | 0.408603789 | 0.999071534 | Bzw1          | Bzw1          | BZW1         | 389.7799063 | 339.079764  | 268.9442803 | 308.1259352 | 333.7492718 | 394.8074884 | 559.7225733 | 283.6525495 | 272.1618213 | 281.0435474 |
| ENSMUSG000000006418 | -0.185192396 | 5.7494265    | 0.682564289 | 0.408705117 | 0.999071534 | Rnf114        | Rnf114        | RNF114       | 62.03914965 | 71.74095373 | 46.85487336 | 55.15877471 | 61.08599253 | 54.20781033 | 36.82300199 | 67.07906127 | 35.5130321  | 49.47673613 |
| ENSMUSG00000022009  | 0.205999356  | 5.3612549    | 0.682551506 | 0.408709504 | 0.999071534 | Nufip1        | Nufip1        | NUFIP1       | 31.37047499 | 36.93769767 | 53.99081671 | 33.30341114 | 41.98844454 | 31.79706459 | 46.27143484 | 49.87753063 | 42.42707375 | 36.79709702 |
| ENSMUSG000000021149 | 0.177397469  | 6.270819773  | 0.682501286 | 0.408726744 | 0.999071534 | Gtbp4         | Gtbp4         | GTPBP4       | 83.51423991 | 75.95054689 | 83.88099455 | 60.08490427 | 73.12006386 | 105.2868477 | 77.98192864 | 55.81862153 | 71.89031941 | 86.7313459  |
| ENSMUSG00000039041  | 0.182708688  | 5.872737075  | 0.682180915 | 0.408836744 | 0.999071534 | Adrm1         | Adrm1         | ADRM1        | 61.89878958 | 52.41239926 | 68.73394497 | 50.78770199 | 50.62158268 | 95.46395592 | 70.15137813 | 40.82772936 | 44.31272148 | 56.99301705 |
| ENSMUSG00000020546  | 0.223199723  | 4.397158707  | 0.68216937  | 0.408840709 | 0.999071534 | Stxbp4        | Stxbp4        | STXBP4       | 17.82572852 | 18.32062372 | 19.79214478 | 20.88401407 | 23.34871449 | 20.88274036 | 14.04321869 | 20.44840591 | 24.90626367 | 26.40502166 |
| ENSMUSG00000029600  | -0.331260003 | 3.019528087  | 0.682157292 | 0.408844857 | 0.999071534 | 1110008J03Rik | Rita1         | RITA1        | 13.33420637 | 8.537766395 | 6.193460271 | 8.117706466 | 10.13739705 | 10.98708639 | 12.10175988 | 4.006782239 | 3.064177549 | 5.294076125 |
| ENSMUSG000000081824 | 0.275310895  | 4.168413631  | 0.682146325 | 0.408848623 | 0.999071534 | BC002163      | BC002163      |              | 13.19384631 | 15.83044186 | 18.10913927 | 15.47220976 | 21.32123508 | 25.32123221 | 35.46398083 | 17.33969555 | 9.035395336 | 9.86920364  |
| ENSMUSG00000072844  | 0.484066527  | 2.775681384  | 0.682090697 | 0.408867728 | 0.999071534 | G530011O06Rik | G530011O06Rik |              | 1.263240604 | 2.727342043 | 7.405224238 | 11.17051915 | 6.017035667 | 2.837724299 | 2.200319978 | 9.602460883 | 9.349669957 | 12.02604947 |

|                     |              |              |             |             |             |               |               |          |             |             |             |             |             |             |             |             |             |             |
|---------------------|--------------|--------------|-------------|-------------|-------------|---------------|---------------|----------|-------------|-------------|-------------|-------------|-------------|-------------|-------------|-------------|-------------|-------------|
| ENSMUSG00000041926  | -0.189413633 | 6.116368403  | 0.682066628 | 0.408875995 | 0.999071534 | Rnpep         | Rnpep         | RNPEP    | 85.33892079 | 66.99775018 | 69.33982695 | 66.46805807 | 96.14176555 | 109.2887666 | 51.6428042  | 48.28863422 | 45.4912513  | 67.25437448 |
| ENSMUSG00000034912  | 0.655288366  | 0.03444549   | 0.681904611 | 0.408931649 | 0.999071534 | Mdga2         | Mdga2         | MDGA2    | 0.280720134 | 0.296450222 | 2.154247051 | 0.416292639 | 0.457817931 | 0.727621615 | 0.388291761 | 1.174401691 | 1.178529826 | 1.699333077 |
| ENSMUSG00000042350  | -0.20300586  | 4.75442697   | 0.681861621 | 0.408946418 | 0.999071534 | Arel1         | Arel1         | AREL1    | 38.24811828 | 35.27757642 | 23.56207712 | 24.70002993 | 27.99229636 | 39.43709155 | 25.30367975 | 24.10977589 | 15.32088774 | 19.93448417 |
| ENSMUSG00000020899  | 0.204707503  | 4.958586433  | 0.681419737 | 0.409098271 | 0.999071534 | Pfas          | Pfas          | PFAS     | 28.91417382 | 24.24962816 | 34.19867193 | 32.74835429 | 28.84252966 | 59.51944813 | 27.18042326 | 22.10638477 | 25.92765618 | 30.32655953 |
| ENSMUSG00000020788  | -0.447423211 | 1.681515866  | 0.681350445 | 0.409122091 | 0.999071534 | Atp2a3        | Atp2a3        | ATP2A3   | 5.333682549 | 4.802493597 | 1.95228639  | 4.232308499 | 2.027479409 | 4.80230266  | 2.135604685 | 1.174401691 | 0.785686551 | 4.313691657 |
| ENSMUSG00000040841  | -0.297492298 | 3.056710413  | 0.681028312 | 0.409232853 | 0.999071534 | Slx5          | Slx5          | SIX5     | 6.807463254 | 6.284744707 | 8.886269085 | 11.51742969 | 13.21131744 | 8.58593506  | 5.694945826 | 5.941090906 | 5.814080477 | 9.607767782 |
| ENSMUSG00000021273  | 0.186512444  | 6.241530208  | 0.680939151 | 0.409263519 | 0.999071534 | Fdft1         | Fdft1         | FDF1     | 67.23247213 | 50.39653775 | 73.78296149 | 87.76836478 | 86.33138131 | 83.16715062 | 76.55819219 | 71.08584351 | 69.69039707 | 86.20847418 |
| ENSMUSG00000050088  | 0.181822463  | 5.473335214  | 0.680706186 | 0.40932508  | 0.999071534 | 1600012H06Rik | 1600012H06Rik | C6orf120 | 40.98513959 | 44.17108308 | 33.72743039 | 44.26578398 | 52.38745184 | 40.16471316 | 50.47792891 | 47.04515008 | 36.53442462 | 51.56822299 |
| ENSMUSG00000022191  | 0.188992005  | 5.675654617  | 0.680507551 | 0.409412006 | 0.999071534 | Drosha        | Drosha        | DROSHA   | 41.82729999 | 56.38483223 | 49.00912041 | 46.6247756  | 53.56469795 | 85.20449114 | 33.91081378 | 43.52194501 | 48.63399751 | 55.03224811 |
| ENSMUSG00000045636  | -0.234889301 | 3.837979852  | 0.680277419 | 0.409491212 | 0.999071534 | Mtus1         | Mtus1         | MTUS1    | 15.57996745 | 18.37991377 | 15.2143698  | 11.86434022 | 18.83593774 | 21.31931333 | 12.10175988 | 12.78025369 | 7.464022234 | 11.24174189 |
| ENSMUSG00000047824  | -0.192069608 | 5.988077551  | 0.680240818 | 0.409503812 | 0.999071534 | Pygo2         | Pygo2         | PYGO2    | 78.0401973  | 65.45620903 | 70.8208718  | 65.35794437 | 71.3541947  | 101.9397883 | 41.80607959 | 42.07121351 | 41.40568124 | 67.45045137 |
| ENSMUSG00000057835  | 0.421725743  | 1.801027451  | 0.679777809 | 0.409663245 | 0.999071534 | Zfp119a       | Zfp119a       | ZNF788   | 2.666841275 | 3.616692709 | 1.211763966 | 5.550568524 | 1.63506404  | 3.274297269 | 4.659501131 | 4.62852431  | 3.299883514 | 2.483640651 |
| ENSMUSG00000024300  | -0.259994646 | 4.497656937  | 0.679278799 | 0.409835178 | 0.999071534 | Myo1f         | Myo1f         | MYO1F    | 38.31829831 | 26.26548967 | 20.66730764 | 18.80255087 | 23.74112986 | 43.80282124 | 15.8552469  | 16.71795348 | 8.249708785 | 20.19592003 |
| ENSMUSG00000021257  | -0.366874269 | 1.998728161  | 0.679133722 | 0.409885184 | 0.999071534 | Angel1        | Angel1        | ANGEL1   | 6.526743119 | 5.098943819 | 4.914376085 | 2.22022741  | 3.989556257 | 6.184783729 | 3.17104938  | 2.486968286 | 1.728510412 | 3.398666154 |
| ENSMUSG00000032435  | -0.267460407 | 5.455410003  | 0.678939693 | 0.409952076 | 0.999071534 | Dync11l1      | Dync11l1      | DYNCL11  | 59.16176828 | 71.44450351 | 30.09213849 | 34.06661432 | 55.06895686 | 77.12789121 | 53.584263   | 31.6397632  | 13.8280833  | 26.86253441 |
| ENSMUSG00000032328  | 0.22002631   | 7.994993664  | 0.678833228 | 0.409988788 | 0.999071534 | Tmem30a       | Tmem30a       | TMEM30A  | 230.8923104 | 272.7342043 | 271.4443117 | 269.8270124 | 229.2359784 | 255.5407113 | 346.6798272 | 238.7489555 | 260.9256306 | 207.3839944 |
| ENSMUSG00000032410  | 0.194581575  | 5.3564233    | 0.678475721 | 0.410112099 | 0.999071534 | Xrn1          | Xrn1          | XRN1     | 34.17767633 | 45.35688397 | 38.77644692 | 35.38487434 | 44.21213164 | 45.03977798 | 29.63960441 | 54.64421984 | 43.13419165 | 35.22848187 |
| ENSMUSG00000027176  | 0.299965934  | 4.54531094   | 0.678427031 | 0.410128897 | 0.999071534 | Cstf3         | Cstf3         | CSTF3    | 31.86173523 | 26.26548967 | 15.5509709  | 11.72557601 | 23.6757273  | 52.09770765 | 37.27600904 | 10.91502748 | 12.2567102  | 18.43122799 |
| ENSMUSG00000062960  | 0.313901592  | 4.087260834  | 0.677944867 | 0.410295301 | 0.999071534 | Kdr           | Kdr           | KDR      | 17.05374815 | 17.25340292 | 15.75293156 | 10.33793388 | 18.11650956 | 38.34565912 | 25.62725622 | 4.62852431  | 10.44963113 | 16.27438216 |
| ENSMUSG00000035941  | -0.205178832 | 4.797093251  | 0.677646581 | 0.410398295 | 0.999071534 | Ibtk          | Ibtk          | IBTK     | 35.51109697 | 34.38822576 | 25.44704329 | 29.97307003 | 28.64632198 | 44.8214915  | 28.08643737 | 18.58317969 | 16.49941757 | 20.58807382 |
| ENSMUSG00000090157  | -0.996348891 | -0.941468423 | 0.677352203 | 0.410499977 | 0.999071534 | Gm16534       | Gm16534       |          | 1.052700503 | 0           | 1.211763966 | 0           | 0.457817931 | 0.218286485 | 0           | 0.27632981  | 0.31427462  | 0.392153787 |
| ENSMUSG00000074578  | 0.25673774   | 7.157193641  | 0.677274839 | 0.410526706 | 0.999071534 | 1500012F01Rik | Zfas1         |          | 173.2745028 | 93.20394981 | 143.3247491 | 170.0555432 | 90.90956062 | 88.04221544 | 126.5183988 | 178.3708921 | 158.0015654 | 174.5737942 |
| ENSMUSG00000031357  | -0.198869173 | 6.153961871  | 0.676991435 | 0.410624642 | 0.999071534 | Syap1         | Syap1         | SYAP1    | 72.63633472 | 108.9158116 | 56.61630531 | 69.24334234 | 88.03184791 | 72.39835071 | 86.84792385 | 71.36217332 | 38.57720965 | 54.3132995  |
| ENSMUSG00000032551  | 0.21907929   | 4.192299702  | 0.676966644 | 0.41063321  | 0.999071534 | 1110059G10Rik | KIAA1143      |          | 14.45708691 | 15.47470159 | 19.72482456 | 17.76181928 | 19.55536592 | 17.17187012 | 22.19734566 | 23.14262155 | 12.09957289 | 19.73840728 |
| ENSMUSG00000042228  | -0.254892246 | 6.141883462  | 0.676946847 | 0.410640053 | 0.999071534 | Lyn           | Lyn           | LYN      | 112.2178736 | 95.04194118 | 53.65421561 | 63.76215592 | 75.40915352 | 126.3151124 | 84.51817328 | 34.33397884 | 26.87048004 | 56.47014533 |
| ENSMUSG00000036596  | 0.992023445  | -0.764432285 | 0.676930274 | 0.410645782 | 0.999071534 | Cpz           | Cpz           | CPZ      | 0           | 0.415030311 | 0.605881983 | 0           | 0.523220493 | 1.673529715 | 1.164875283 | 0.27632981  | 0           | 0.065358965 |
| ENSMUSG00000020437  | -0.279472452 | 3.341135918  | 0.676885058 | 0.410661411 | 0.999071534 | Myo1g         | Myo1g         | MYO1G    | 16.28176778 | 13.87387039 | 9.89607239  | 6.521918016 | 10.79142266 | 14.33414582 | 6.665675228 | 9.740625788 | 5.264099892 | 8.888819173 |
| ENSMUSG00000019295  | 0.240944841  | 4.180894501  | 0.676801899 | 0.410690159 | 0.999071534 | Tmem129       | Tmem129       | TMEM129  | 19.08896912 | 21.87802639 | 11.915679   | 13.59889288 | 19.62076848 | 26.04885382 | 26.72741621 | 17.13244819 | 8.32827744  | 18.82338178 |
| ENSMUSG00000039450  | -0.269029893 | 3.385552992  | 0.67644067  | 0.410815068 | 0.999071534 | Dcxr          | Dcxr          | DCXR     | 11.86042567 | 12.39161928 | 7.539864678 | 14.57024238 | 11.96866877 | 9.750129644 | 7.701119924 | 6.977327692 | 8.563983406 | 11.9606905  |
| ENSMUSG00000069910  | 0.272566887  | 3.909809637  | 0.676268977 | 0.410874457 | 0.999071534 | Spd1l         | Spd1l         | SPDL1    | 12.7727661  | 10.07930755 | 16.29149332 | 14.77838869 | 16.02362759 | 28.81381596 | 18.70271982 | 6.839162787 | 14.61376985 | 11.82997258 |
| ENSMUSG00000097750  | 0.408338021  | 2.926553565  | 0.676158067 | 0.410912828 | 0.999071534 | Gm4673        | Gm4673        |          | 7.088183388 | 4.150303108 | 10.70391503 | 8.464616999 | 2.681505025 | 6.257545891 | 2.912188207 | 6.148338263 | 13.90665195 | 9.803844676 |
| ENSMUSG000000001768 | -0.225051759 | 6.691518229  | 0.676101579 | 0.410932372 | 0.999071534 | Rin2          | Rin2          | RIN2     | 72.28543455 | 149.7073621 | 90.14177504 | 126.4141981 | 138.0648075 | 93.71766404 | 63.35627232 | 134.5726173 | 73.30455521 | 92.28685788 |
| ENSMUSG00000027323  | 0.381411985  | 4.08821509   | 0.675849943 | 0.411019455 | 0.999071534 | Rad51         | Rad51         | RAD51    | 26.38769261 | 8.952796705 | 13.26208341 | 16.23541293 | 11.24924059 | 33.83440511 | 35.91698788 | 4.144947144 | 14.6923385  | 6.928050238 |
| ENSMUSG00000037239  | -0.220027461 | 4.178200174  | 0.675849352 | 0.411019659 | 0.999071534 | Spred3        | Spred3        | SPRED3   | 21.3347302  | 23.8938879  | 15.95489222 | 21.02277828 | 18.11650956 | 21.82864846 | 13.59021163 | 20.58657081 | 9.192532646 | 16.53581802 |
| ENSMUSG00000054178  | -0.685440995 | -0.018929537 | 0.675759446 | 0.411050779 | 0.999071534 | Gm9938        | Gm9938        |          | 0.771980369 | 2.608761954 | 0.875162864 | 0.555056852 | 0.588623054 | 1.819054038 | 0.711868228 | 0.414494714 | 0           | 0.457512752 |
| ENSMUSG00000056209  | 0.211349949  | 5.288707458  | 0.675625564 | 0.411097128 | 0.999071534 | Npm3          | Npm3          | NPM3     | 42.95018053 | 29.34857198 | 34.60259326 | 35.93993119 | 44.93155982 | 49.40550767 | 68.20991933 | 27.63298096 | 25.06340098 | 35.22848187 |
| ENSMUSG00000036390  | 0.355223059  | 6.075910245  | 0.675600143 | 0.411105929 | 0.999071534 | Gadd45a       | Gadd45a       | GADD45A  | 31.23011493 | 82.47245177 | 55.13526046 | 59.87675795 | 77.95985342 | 28.15895651 | 23.55636683 | 158.5442282 | 53.1909795  | 90.13001205 |
| ENSMUSG00000030188  | 0.244844308  | 5.009320857  | 0.675562683 | 0.411118899 | 0.999071534 | Magohb        | Magohb        | MAGOHb   | 21.19437013 | 15.29683146 | 47.12415424 | 38.50706913 | 29.10413991 | 32.30639972 | 31.06334087 | 28.46197039 | 35.19875748 | 38.43107113 |
| ENSMUSG00000024883  | 0.217600886  | 4.91042215   | 0.674815617 | 0.411377685 | 0.999071534 | Rin1          | Rin1          | RIN1     | 38.73937852 | 39.07213926 | 21.60979073 | 16.929234   | 28.51551686 | 51.4428482  | 27.89229149 | 25.90591965 | 27.34189197 | 25.88214994 |

|                    |              |              |             |             |             |               |               |          |             |             |             |             |             |             |             |             |             |             |
|--------------------|--------------|--------------|-------------|-------------|-------------|---------------|---------------|----------|-------------|-------------|-------------|-------------|-------------|-------------|-------------|-------------|-------------|-------------|
| ENSMUSG00000044948 | -0.22925851  | 4.895779803  | 0.674663548 | 0.411430392 | 0.999071534 | Wdr96         | Cfap43        | CFAP43   | 31.65119513 | 57.98566343 | 29.55357673 | 21.43907092 | 26.2264272  | 34.12545375 | 27.18042326 | 31.08710358 | 13.8280833  | 28.30043163 |
| ENSMUSG00000016498 | -0.721213914 | -0.359950308 | 0.67458325  | 0.411458226 | 0.999071534 | Pdccl1g2      | Pdccl1g2      | PDCD1LG2 | 1.403600671 | 1.245090933 | 0.740522424 | 0.624438959 | 0.130805123 | 0.582097292 | 0.647152935 | 0.898071881 | 0           | 0.261435858 |
| ENSMUSG00000029727 | 0.546474631  | 0.479152542  | 0.6745322   | 0.411475924 | 0.999071534 | Cyp3a13       | Cyp3a13       | CYP3A4   | 0.701800335 | 0.296450222 | 1.750325729 | 1.110113705 | 1.438856355 | 1.45524323  | 1.553167044 | 2.210638477 | 0.31427462  | 1.830051006 |
| ENSMUSG00000070867 | 0.527694004  | 0.299487076  | 0.674456738 | 0.411502087 | 0.999071534 | Trabdb2b      | Trabdb2b      | TRABD2B  | 1.614140771 | 0.711480533 | 1.144443746 | 0.346910533 | 0.915635862 | 1.45524323  | 1.359021163 | 0.828989429 | 1.649941757 | 0.915025503 |
| ENSMUSG00000059923 | -0.174888687 | 6.740343805  | 0.67443607  | 0.411509253 | 0.999071534 | Grb2          | Grb2          | GRB2     | 107.9368916 | 107.2556903 | 134.43848   | 112.676541  | 125.3767106 | 114.2365936 | 88.53052148 | 103.0019365 | 81.23998937 | 98.29988262 |
| ENSMUSG00000024424 | -0.172221658 | 5.622519569  | 0.674388066 | 0.411525898 | 0.999071534 | Ttc39c        | Ttc39c        | TTC39C   | 60.28464881 | 66.46413978 | 47.79735644 | 42.32308499 | 54.41493125 | 46.64054554 | 45.04184426 | 51.53550949 | 32.21314859 | 48.16955684 |
| ENSMUSG00000041757 | 0.68514754   | 0.286011251  | 0.674195163 | 0.411592795 | 0.999071534 | Plekha6       | Plekha6       | PLEKHA6  | 0.421080201 | 0.592900444 | 0.403921322 | 2.428373729 | 0.327012808 | 1.8918162   | 1.035444696 | 0.690824524 | 0.078568655 | 3.071871332 |
| ENSMUSG00000026890 | 0.307629657  | 2.738725615  | 0.67415868  | 0.411605448 | 0.999071534 | Lhx6          | Lhx6          | LHX6     | 4.912602348 | 5.988294485 | 6.395420932 | 6.03624327  | 6.998074091 | 9.968416129 | 5.177223478 | 6.010173358 | 8.799689371 | 4.771204409 |
| ENSMUSG00000081406 | -0.385712584 | 9.321771476  | 0.674032532 | 0.411649206 | 0.999071534 | Rps6-ps4      | Rps6-ps4      |          | 1141.408066 | 805.9295736 | 535.599673  | 605.7057902 | 692.2207119 | 691.0950101 | 1174.064854 | 484.9588158 | 49.10540944 | 406.6634771 |
| ENSMUSG00000037568 | 0.214462232  | 4.426786776  | 0.673601969 | 0.411798609 | 0.999071534 | Vash2         | Vash2         | VASH2    | 20.49256979 | 15.65257172 | 22.28299293 | 17.69243717 | 26.88045282 | 25.75780518 | 15.8552469  | 28.60013529 | 15.94943698 | 25.29391926 |
| ENSMUSG00000037242 | -0.210429591 | 7.512351478  | 0.673374251 | 0.411877657 | 0.999071534 | Clic4         | Clic4         | CLIC4    | 184.082228  | 263.4256673 | 198.59465   | 169.7086326 | 202.3555256 | 240.2606573 | 117.7171188 | 188.4569301 | 136.2380479 | 143.9857988 |
| ENSMUSG00000029490 | -0.447710678 | 1.50346859   | 0.673279179 | 0.411910667 | 0.999071534 | Mfsd7a        | Mfsd7a        | MFSD7    | 5.895122818 | 1.541541155 | 1.481044848 | 4.232308499 | 3.008517833 | 2.473913492 | 2.200319978 | 1.312566595 | 1.099961171 | 4.117614764 |
| ENSMUSG00000063087 | 0.501739456  | 2.1340652    | 0.673228093 | 0.411928406 | 0.999071534 | Gm10125       | Gm10125       |          | 3.36864161  | 1.185800888 | 8.280387102 | 2.775284262 | 2.746907587 | 2.328389169 | 1.617882337 | 2.763298096 | 10.44963113 | 5.032640267 |
| ENSMUSG00000097252 | 0.29883039   | 2.798141151  | 0.672961992 | 0.412020824 | 0.999071534 | Gm6634        | Gm6634        |          | 7.158363421 | 5.810424352 | 4.981696305 | 5.61995063  | 8.306125323 | 6.69411886  | 10.03087049 | 7.460904859 | 4.085570065 | 8.300588492 |
| ENSMUSG00000038776 | -0.266929223 | 4.594880998  | 0.672855657 | 0.412057763 | 0.999071534 | Ephx1         | Ephx1         | EPHX1    | 24.49283171 | 31.12727331 | 32.4483462  | 22.13289199 | 26.29182976 | 26.48542679 | 24.26823505 | 32.12334036 | 5.342668547 | 20.32663796 |
| ENSMUSG00000028955 | 0.200570882  | 6.520440222  | 0.672529466 | 0.412171108 | 0.999071534 | Vamp3         | Vamp3         | VAMP3    | 109.7615725 | 80.69375044 | 85.09275851 | 83.7442026  | 83.97688909 | 104.2681775 | 148.0038762 | 67.56263844 | 80.76857744 | 73.59419403 |
| ENSMUSG00000027832 | -0.514634291 | 1.19192761   | 0.672503439 | 0.412180154 | 0.999071534 | Ptx3          | Ptx3          | PTX3     | 3.228281543 | 3.557402664 | 4.106533441 | 0.485674746 | 1.831271725 | 2.40115133  | 2.912188207 | 1.865226215 | 0.235705965 | 1.437897219 |
| ENSMUSG00000030895 | 0.439981103  | 2.152802043  | 0.67242134  | 0.41220869  | 0.999071534 | Hpx           | Hpx           | HPX      | 2.877381375 | 2.253021687 | 4.981696305 | 5.064893778 | 3.727946011 | 1.382481069 | 1.812028217 | 6.493750525 | 5.814080477 | 7.320204025 |
| ENSMUSG00000034544 | 0.203134947  | 5.911397967  | 0.672196395 | 0.41228689  | 0.999071534 | Rsrc1         | Rsrc1         | RSRC1    | 42.95018053 | 46.36481473 | 73.51368061 | 67.99446442 | 57.48885164 | 56.75448599 | 55.39629122 | 59.61815642 | 74.24737907 | 56.5355043  |
| ENSMUSG00000030313 | 0.249189118  | 4.198291475  | 0.67213586  | 0.412307939 | 0.999071534 | Dennd5b       | Dennd5b       | DENND5B  | 12.562226   | 14.76322106 | 22.8215547  | 19.35760773 | 16.54684808 | 16.00767553 | 13.13720458 | 26.25133191 | 20.74212495 | 17.05868974 |
| ENSMUSG00000067929 | 1.044646279  | -0.291831133 | 0.672127413 | 0.412310876 | 0.999071534 | Gm10226       | Gm10226       |          | 0           | 0           | 1.750325729 | 0           | 0.588623054 | 0.873145938 | 1.68259763  | 0           | 1.099961171 | 0.784307574 |
| ENSMUSG00000091086 | -0.443200558 | 2.932905068  | 0.67207455  | 0.412329258 | 0.999071534 | Gm5428        | Rpl6l         | RPL6     | 9.12340436  | 8.47847635  | 4.308494102 | 13.59889288 | 9.02555535  | 1.964578361 | 11.26046107 | 6.63191543  | 0.942823861 | 9.999921569 |
| ENSMUSG00000051177 | -0.252123781 | 3.34251369   | 0.67186861  | 0.412400882 | 0.999071534 | Plcb1         | Plcb1         | PLCB1    | 10.73754513 | 14.40748079 | 11.51175768 | 7.84017804  | 12.23027902 | 13.2427134  | 8.283557565 | 8.35897674  | 6.835472994 | 8.169870563 |
| ENSMUSG00000024713 | 0.495315795  | 1.225442832  | 0.671768813 | 0.412435597 | 0.999071534 | Pcsk5         | Pcsk5         | PCSK5    | 1.543960738 | 2.312311732 | 3.433331237 | 0.901967385 | 1.308051232 | 6.257545891 | 3.235764674 | 2.279720929 | 0.864255206 | 0.71894861  |
| ENSMUSG00000058997 | -0.196612846 | 4.763606782  | 0.671662327 | 0.412472644 | 0.999071534 | Vwa8          | Vwa8          | VWA8     | 25.12445201 | 35.45544656 | 26.92808814 | 32.47082586 | 29.6273604  | 38.63670777 | 25.56254092 | 23.41895136 | 14.06378926 | 23.65994515 |
| ENSMUSG00000086541 | -0.461577041 | 0.926857516  | 0.671550574 | 0.412511528 | 0.999071534 | Has2os        | Has2os        |          | 2.807201342 | 1.363671021 | 2.558168373 | 1.457024238 | 2.485297341 | 1.236956746 | 1.229590576 | 2.694215643 | 0.471411931 | 1.568615148 |
| ENSMUSG00000036435 | 0.18027413   | 5.248767428  | 0.671110288 | 0.412664778 | 0.999071534 | Exoc1         | Exoc1         | EXOC1    | 41.47639982 | 44.52682335 | 35.67971678 | 25.87952574 | 37.73727804 | 47.58645364 | 34.94625848 | 31.57068074 | 34.41307093 | 46.47022376 |
| ENSMUSG00000013089 | -0.27864725  | 4.445480025  | 0.671002623 | 0.412702265 | 0.999071534 | Etv5          | Etv5          | ETV5     | 23.72085134 | 26.79910007 | 22.41763337 | 23.58991623 | 26.81505025 | 49.18722119 | 20.45003274 | 9.53337843  | 9.113963991 | 13.39858772 |
| ENSMUSG00000033157 | 0.277250851  | 2.810106336  | 0.670781206 | 0.412779376 | 0.999071534 | Abhd10        | Abhd10        | ABHD10   | 6.526743119 | 6.99622524  | 6.664701814 | 5.550568524 | 6.605658721 | 8.294886414 | 8.477703446 | 6.35558562  | 6.756904338 | 6.470537486 |
| ENSMUSG00000026385 | 0.224566182  | 7.009865329  | 0.670690809 | 0.412810863 | 0.999071534 | Dbi           | Dbi           | DBI      | 134.6754844 | 72.39314422 | 123.2633234 | 158.1912029 | 124.7880875 | 112.1992531 | 180.8792453 | 109.2884397 | 110.8603723 | 151.4367208 |
| ENSMUSG00000039473 | 0.202554073  | 5.912304617  | 0.670609068 | 0.412839339 | 0.999071534 | Ubn1          | Ubn1          | UBN1     | 50.17872398 | 55.91051188 | 58.36663104 | 66.95373282 | 57.61965677 | 63.30308052 | 33.7813832  | 70.6713488  | 62.93349273 | 75.489604   |
| ENSMUSG00000022773 | 0.508085394  | 0.770631201  | 0.670190877 | 0.412985067 | 0.999071534 | Ypel1         | Ypel1         | YPEL1    | 1.122880537 | 1.422961066 | 1.211763966 | 0.693821065 | 2.354492217 | 0.509335131 | 1.29430587  | 2.141556024 | 1.571373102 | 3.137230296 |
| ENSMUSG00000075585 | -0.262434001 | 3.574480528  | 0.669574865 | 0.413199868 | 0.999071534 | 6330403L08Rik | 6330403L08Rik |          | 13.19384631 | 15.53399163 | 11.04051614 | 9.089055958 | 18.24731469 | 15.28005392 | 6.018522294 | 11.74401691 | 8.32827744  | 11.045665   |
| ENSMUSG00000020228 | -0.226264796 | 4.076065446  | 0.669554056 | 0.413207127 | 0.999071534 | Helb          | Helb          | HELB     | 21.5452703  | 24.66465847 | 12.99280253 | 14.22333184 | 20.73261203 | 21.39207549 | 16.24353866 | 13.26383086 | 8.956826681 | 16.40510009 |
| ENSMUSG00000038546 | 0.227602834  | 6.477259548  | 0.669228296 | 0.413320788 | 0.999071534 | Ranbp9        | Ranbp9        | RANBP9   | 59.23194831 | 98.18431354 | 87.0450449  | 76.73660984 | 104.7095011 | 68.68748048 | 68.98650285 | 151.0142409 | 71.18320152 | 96.46983161 |
| ENSMUSG00000028411 | -0.260684043 | 3.607476554  | 0.668902073 | 0.413434656 | 0.999071534 | Aptx          | Aptx          | APTX     | 19.08896912 | 14.11103057 | 11.04051614 | 9.991023343 | 14.38856355 | 16.15319986 | 15.20809397 | 6.977327692 | 6.835472994 | 9.215613995 |
| ENSMUSG00000021177 | 0.249965483  | 3.966072497  | 0.6688775   | 0.413443235 | 0.999071534 | Tdp1          | Tdp1          | TDP1     | 17.12392818 | 11.68013875 | 16.29149332 | 10.06040545 | 18.77053518 | 28.7410538  | 20.12645627 | 9.80970824  | 11.39245499 | 13.9868184  |
| ENSMUSG00000054648 | -0.458294189 | 2.360799433  | 0.668823548 | 0.413462073 | 0.999071534 | Zfp869        | Zfp869        |          | 8.702342159 | 9.54569715  | 3.702612119 | 2.081463196 | 6.344048475 | 7.276216152 | 8.801279913 | 2.763298096 | 0.707117896 | 1.960768935 |
| ENSMUSG00000038462 | 0.190340254  | 6.851518457  | 0.668602226 | 0.413539359 | 0.999071534 | Uqcrfs1       | Uqcrfs1       | UQCRF51  | 128.2189213 | 95.33839141 | 110.8764029 | 115.1742969 | 109.353083  | 115.1097395 | 159.8467749 | 95.54103166 | 97.58226963 | 124.0513146 |

|                    |              |              |             |             |             |                |               |          |             |             |             |             |             |             |             |             |             |             |
|--------------------|--------------|--------------|-------------|-------------|-------------|----------------|---------------|----------|-------------|-------------|-------------|-------------|-------------|-------------|-------------|-------------|-------------|-------------|
| ENSMUSG00000068580 | 0.212987081  | 4.149240578  | 0.668052742 | 0.413731335 | 0.999071534 | Zfyve19        | Zfyve19       | ZFYVE19  | 19.15914916 | 17.31269297 | 18.98430214 | 11.86434022 | 17.72409419 | 20.15511874 | 19.93231039 | 13.40199576 | 17.20653547 | 20.32663796 |
| ENSMUSG00000022962 | 0.217411949  | 5.464168905  | 0.667805834 | 0.413817641 | 0.999071534 | Gart           | Gart          | GART     | 48.07332298 | 36.99698771 | 49.48036195 | 38.71521545 | 38.12969341 | 88.26050193 | 56.10815945 | 24.31702324 | 31.58459935 | 37.71212252 |
| ENSMUSG00000043807 | 0.906402468  | -0.766829064 | 0.667637417 | 0.413876525 | 0.999071534 | Ly6g5b         | Ly6g5b        | LY6G5B   | 0.280720134 | 0.059290044 | 1.279084186 | 0           | 0.065402562 | 0.654859454 | 0.064715293 | 0.552659619 | 1.099961171 | 0.457512752 |
| ENSMUSG00000058594 | -0.260496843 | 4.952639142  | 0.666869534 | 0.414145163 | 0.999071534 | Fbxo18         | Fbxo18        | FBXO18   | 40.63423942 | 58.57856387 | 23.42743668 | 24.28373729 | 28.51551686 | 42.9296753  | 40.77063489 | 25.00784777 | 10.13535651 | 22.2874069  |
| ENSMUSG00000026482 | -0.240689758 | 5.324488944  | 0.66686223  | 0.41414772  | 0.999071534 | Rgl1           | Rgl1          | RG11     | 31.01957483 | 60.71300547 | 33.18886863 | 33.78908589 | 67.1030282  | 44.23939421 | 29.44545853 | 53.46981815 | 15.79229967 | 37.51604563 |
| ENSMUSG00000042185 | 0.233419459  | 3.886187638  | 0.666793806 | 0.41417167  | 0.999071534 | Nfrkb          | Nfrkb         | NFRKB    | 13.05348624 | 15.23754141 | 15.48365068 | 12.21125075 | 13.99614818 | 17.68120525 | 9.189571674 | 16.78703593 | 13.59237733 | 19.08481764 |
| ENSMUSG00000024588 | -0.211071398 | 4.786843703  | 0.666728881 | 0.414194398 | 0.999071534 | Fech           | Fech          | FECH     | 38.94991862 | 33.380295   | 28.27449254 | 24.49188361 | 28.51551686 | 39.00051858 | 34.16967496 | 21.00106553 | 13.04239675 | 19.93448417 |
| ENSMUSG00000032875 | -0.230692063 | 4.724147056  | 0.666603578 | 0.414238266 | 0.999071534 | Arhgef17       | Arhgef17      | ARHGEF17 | 26.03679244 | 34.4475158  | 28.34181276 | 25.94890785 | 32.89748848 | 45.40358879 | 12.29590576 | 25.8368372  | 13.8280833  | 24.3135348  |
| ENSMUSG00000097131 | 0.538383602  | 1.004468194  | 0.666470587 | 0.414284834 | 0.999071534 | D230017M19Rlk  | D230017M19Rlk |          | 0.771980369 | 1.956571465 | 0.269280881 | 3.399723221 | 1.438856355 | 1.018670261 | 1.29430587  | 2.417885834 | 2.985608894 | 2.548999616 |
| ENSMUSG00000058392 | 0.21522708   | 4.513806764  | 0.666461833 | 0.414287899 | 0.999071534 | Rrp1b          | Rrp1b         | RRP1B    | 22.87869093 | 17.01624274 | 24.1679591  | 20.1208109  | 25.04918109 | 39.1460429  | 17.66727512 | 16.99428329 | 23.80630249 | 21.82989414 |
| ENSMUSG00000033808 | 0.20830306   | 5.180730777  | 0.666256681 | 0.414359751 | 0.999071534 | Tmem87a        | Tmem87a       | TMEM87A  | 47.72242281 | 37.94562842 | 30.29409915 | 26.08767206 | 32.89748848 | 38.92775641 | 59.92636176 | 37.09727694 | 24.12057712 | 28.49650852 |
| ENSMUSG00000027230 | -0.240423706 | 5.568768886  | 0.666212212 | 0.414375328 | 0.999071534 | Creb3l1        | Creb3l1       | CREB3L1  | 37.19541778 | 46.83913508 | 72.16727621 | 46.27786507 | 63.70209499 | 41.9837672  | 17.53784453 | 54.09156022 | 38.81291562 | 54.70545329 |
| ENSMUSG00000038156 | 0.374469859  | 3.984098966  | 0.666154295 | 0.414395616 | 0.999071534 | Spon1          | Spon1         | SPON1    | 22.45761073 | 15.17825137 | 14.20456649 | 7.215739081 | 12.49188926 | 33.68888078 | 36.43471023 | 5.043019025 | 7.621159544 | 7.712357812 |
| ENSMUSG00000063142 | -0.723840917 | 0.11931936   | 0.665970519 | 0.414460005 | 0.999071534 | Kcnma1         | Kcnma1        | KCNMA1   | 1.122880537 | 2.54947191  | 0.471241542 | 0.069382107 | 1.962076848 | 0.654859454 | 0.711868228 | 0.759906976 | 0           | 1.372538255 |
| ENSMUSG00000028195 | -0.277629782 | 8.438252169  | 0.665934564 | 0.414472604 | 0.999071534 | Cyr61          | Cyr61         | CYR61    | 403.4650128 | 627.6444101 | 431.4552922 | 219.9412778 | 301.8328218 | 224.1802197 | 248.6361575 | 525.4411329 | 248.0412441 | 239.2791691 |
| ENSMUSG00000045176 | -0.274466504 | 3.964637305  | 0.665761192 | 0.414533363 | 0.999071534 | D2310047M10Rlk | Borcs6        | BORCS6   | 19.65040939 | 15.29683146 | 15.07972936 | 19.35760773 | 18.50892493 | 18.04501606 | 10.8721693  | 19.06675686 | 3.928432755 | 17.84299731 |
| ENSMUSG00000055865 | -0.625720327 | -0.246533749 | 0.665551598 | 0.414606835 | 0.999071534 | Fam19a3        | Fam19a3       | FAM19A3  | 1.19306057  | 1.007930755 | 0.740522424 | 0.901967385 | 0.588623054 | 0.9459081   | 0.647152935 | 0.483577167 | 0           | 0.71894861  |
| ENSMUSG00000031842 | 0.809203471  | -0.724728657 | 0.665030092 | 0.414789728 | 0.999071534 | Pde4c          | Pde4c         | PDE4C    | 0.070180034 | 0.355740266 | 0.201960661 | 0.832585279 | 0.261610246 | 0.654859454 | 1.100159989 | 1.036236786 | 0           | 0.196076894 |
| ENSMUSG00000020463 | 0.181282114  | 6.203836653  | 0.664874626 | 0.414844273 | 0.999071534 | Smek2          | Smek2         | PPP4R3B  | 59.02140821 | 85.14050377 | 61.86728249 | 67.30064335 | 85.02333007 | 84.98620466 | 83.41801329 | 65.14475261 | 78.09724317 | 62.87532385 |
| ENSMUSG00000097752 | 0.588889508  | 0.58333441   | 0.664652732 | 0.414922144 | 0.999071534 | Gm26688        | Gm26688       |          | 0.842160403 | 0.770770577 | 1.279084186 | 2.22022741  | 0.523220493 | 0.436572969 | 0.453007054 | 1.657978857 | 2.985608894 | 1.895409971 |
| ENSMUSG00000021140 | -0.220334779 | 4.910641392  | 0.664651628 | 0.414922531 | 0.999071534 | Pcnx           | Pcnx          | PCNX1    | 32.56353556 | 45.59404415 | 33.45814951 | 26.29581838 | 29.82356809 | 37.03594021 | 15.98467749 | 35.16296827 | 14.77090716 | 33.46378983 |
| ENSMUSG00000055805 | -0.212975863 | 5.85142347   | 0.664255673 | 0.415061539 | 0.999071534 | Fmn1l          | Fmn1l         | FMNL1    | 77.89983723 | 63.49963756 | 45.30650829 | 46.20848296 | 90.51714525 | 88.26050193 | 42.38851723 | 55.88770399 | 24.6705577  | 56.60086326 |
| ENSMUSG00000025860 | 0.184772495  | 6.2620937    | 0.664032322 | 0.415139981 | 0.999071534 | Xiap           | Xiap          | BIRC8    | 72.28543455 | 86.32630466 | 59.71303544 | 69.72901708 | 84.89252495 | 105.3596099 | 109.6277072 | 71.63850313 | 52.40529295 | 61.82958042 |
| ENSMUSG00000045062 | 0.668981758  | 0.213911731  | 0.663993016 | 0.415153788 | 0.999071534 | Pcdhb7         | Pcdhb7        | PCDHB4   | 0           | 0.237160178 | 1.750325729 | 0.555056852 | 1.569661478 | 1.8918162   | 0.841298815 | 0.967154334 | 0.785686551 | 1.764692042 |
| ENSMUSG00000020733 | -0.198472677 | 4.96666547   | 0.66369136  | 0.415259771 | 0.999071534 | Slc9a3r1       | Slc9a3r1      | SLC9A3R1 | 33.0547958  | 29.46715207 | 30.42873959 | 32.74835429 | 47.41685716 | 34.85307537 | 30.67504911 | 35.16296827 | 14.29949523 | 27.71220095 |
| ENSMUSG00000040044 | 0.193585106  | 4.924997293  | 0.663413703 | 0.415357358 | 0.999071534 | Orc3           | Orc3          | ORC3     | 33.6864161  | 37.23414789 | 28.94769475 | 20.74524986 | 26.48803745 | 31.79706459 | 39.02332197 | 31.91609301 | 27.89187256 | 24.3135348  |
| ENSMUSG00000030545 | -0.508363762 | 2.095966312  | 0.663359372 | 0.415376458 | 0.999071534 | Pex11a         | Pex11a        | PEX11A   | 4.000261912 | 2.54947191  | 5.049016526 | 6.383153803 | 7.128879214 | 4.511254014 | 4.724216424 | 5.043019025 | 0           | 2.941153403 |
| ENSMUSG00000008206 | 0.373293673  | 2.084619513  | 0.663144224 | 0.415452104 | 0.999071534 | Cers4          | Cers4         | CERS4    | 2.245761073 | 4.328173242 | 4.981696305 | 4.371072713 | 2.550699902 | 4.074681045 | 2.329750565 | 5.112101477 | 5.814080477 | 4.444409586 |
| ENSMUSG00000026630 | -0.404691568 | 1.2137945    | 0.663139786 | 0.415453664 | 0.999071534 | Batf3          | Batf3         | BATF3    | 2.737021308 | 1.363671021 | 2.692808814 | 3.330341114 | 2.746907587 | 2.983248622 | 2.006174098 | 1.796143762 | 1.099961171 | 1.437897219 |
| ENSMUSG00000022105 | -0.237685387 | 4.139931411  | 0.663135451 | 0.415455189 | 0.999071534 | Rb1            | Rb1           | RB1      | 13.40438641 | 25.43542905 | 20.73462787 | 20.39833933 | 18.051107   | 20.88274036 | 10.41916225 | 22.17546722 | 11.5495923  | 13.26786979 |
| ENSMUSG00000042650 | -0.239373299 | 7.314911894  | 0.663110273 | 0.415464043 | 0.999071534 | Alkbh5         | Alkbh5        | ALKBH5   | 139.7284468 | 265.678689  | 158.6737593 | 137.9316278 | 195.3574515 | 143.5597447 | 81.54126978 | 207.6618519 | 120.3671796 | 145.554414  |
| ENSMUSG00000092390 | 0.357411014  | 2.199436255  | 0.66247569  | 0.41568729  | 0.999071534 | Gm20541        | Gm20541       |          | 2.947561409 | 2.727342043 | 4.443134543 | 4.579219032 | 5.559217736 | 4.001918884 | 5.436084652 | 4.973936572 | 2.121353688 | 7.843075741 |
| ENSMUSG00000029817 | 0.203519511  | 7.270446402  | 0.662313394 | 0.415744414 | 0.999071534 | Tra2a          | Tra2a         | TRA2A    | 154.3960738 | 109.3308419 | 154.9711472 | 176.7856075 | 146.04392   | 155.2744527 | 177.7081959 | 133.7436278 | 142.602109  | 182.6129468 |
| ENSMUSG00000014776 | -0.281047604 | 4.480580409  | 0.662230581 | 0.415773567 | 0.999071534 | Nol3           | Nol3          | NOL3     | 19.36968926 | 21.87802639 | 26.38952637 | 31.08318373 | 27.01125794 | 8.949745867 | 10.74273872 | 25.62958984 | 22.07779208 | 25.29391926 |
| ENSMUSG00000026579 | -0.862590373 | -0.553254724 | 0.662012822 | 0.41585024  | 0.999071534 | F5             | F5            | F5       | 1.263240604 | 1.304380977 | 0.673202203 | 0.138764213 | 0.261610246 | 1.018670261 | 0.841298815 | 0.138164905 | 0           | 0           |
| ENSMUSG00000045752 | -0.239149148 | 4.871269234  | 0.661793351 | 0.415927536 | 0.999071534 | Tssc4          | Tssc4         | TSSC4    | 45.12576157 | 23.47885759 | 29.01501497 | 36.98066279 | 28.90793223 | 47.87750228 | 31.83992439 | 12.29667653 | 17.36367278 | 24.77104755 |
| ENSMUSG00000024191 | 0.201976418  | 4.471182165  | 0.661479617 | 0.416038068 | 0.999071534 | Bnip1          | Bnip1         | BNIP1    | 21.5452703  | 19.50642461 | 23.62939734 | 15.33344555 | 26.94585538 | 22.26522143 | 27.63343032 | 22.86629174 | 15.63516236 | 25.81679098 |
| ENSMUSG00000028790 | 0.196559556  | 7.338688648  | 0.661396726 | 0.416067279 | 0.999071534 | Khdrbs1        | Khdrbs1       | KHDRBS1  | 132.9209835 | 146.7428599 | 170.791399  | 148.8940007 | 183.2579776 | 199.4410847 | 141.4029163 | 163.5872473 | 169.6297264 | 154.9661048 |
| ENSMUSG00000002660 | 0.217310367  | 5.916212968  | 0.661237069 | 0.416123551 | 0.999071534 | Clpp           | Clpp          | CLPP     | 48.63476324 | 37.76775829 | 88.93001107 | 59.39108321 | 53.49929539 | 57.4821076  | 55.33157592 | 50.43019025 | 75.81875217 | 66.01255415 |

|                     |              |              |             |             |             |               |               |          |             |              |             |             |             |             |             |             |             |              |
|---------------------|--------------|--------------|-------------|-------------|-------------|---------------|---------------|----------|-------------|--------------|-------------|-------------|-------------|-------------|-------------|-------------|-------------|--------------|
| ENSMUSG00000027104  | -0.201815213 | 5.242723686  | 0.66122835  | 0.416126624 | 0.999071534 | Atf2          | Atf2          | ATF2     | 32.2126354  | 47.96564593  | 42.6810197  | 44.05763766 | 42.25005479 | 47.22264283 | 40.96478077 | 41.38038898 | 15.63516236 | 28.95402128  |
| ENSMUSG00000000148  | -0.274988542 | 3.803462661  | 0.661151063 | 0.416153869 | 0.999071534 | Brat1         | Brat1         | BRAT1    | 13.33420637 | 13.57742017  | 14.74312825 | 17.34552664 | 19.48996336 | 15.28005392 | 5.953807    | 16.02712896 | 6.206923753 | 18.0390742   |
| ENSMUSG00000022339  | 0.210908673  | 5.004581972  | 0.66109901  | 0.416172219 | 0.999071534 | Ebag9         | Ebag9         | EBAG9    | 23.8612114  | 24.48678834  | 33.52546973 | 37.39695543 | 33.81312435 | 27.72238354 | 34.16967496 | 35.23205072 | 38.498641   | 25.62071409  |
| ENSMUSG00000024660  | 0.228221192  | 5.722018058  | 0.661058864 | 0.416186373 | 0.999071534 | Incenp        | Incenp        | INCENP   | 52.49466509 | 30.59366291  | 67.32022034 | 48.22056405 | 52.97607489 | 110.8895342 | 54.36084652 | 28.80738265 | 40.777132   | 50.97999231  |
| ENSMUSG00000027889  | 0.186540093  | 5.288432994  | 0.660899115 | 0.416242701 | 0.999071534 | Ampd2         | Ampd2         | AMPD2    | 39.23063875 | 36.10763704  | 37.83396383 | 31.84638691 | 44.66994957 | 70.14272371 | 32.61650791 | 28.25472303 | 33.70595304 | 40.58791696  |
| ENSMUSG00000029699  | -0.897592756 | -0.705257068 | 0.66081395  | 0.416272735 | 0.999071534 | Srcrb4d       | Ssc4d         | SSC4D    | 0.140360067 | 0.592900444  | 1.750325729 | 0           | 0.719428178 | 1.018670261 | 0.453007054 | 0.138164905 | 0           | 0.130717929  |
| ENSMUSG00000029177  | 0.225472872  | 6.473008895  | 0.660594615 | 0.4163501   | 0.999071534 | Cenpa         | Cenpa         | CENPA    | 112.919674  | 45.5347541   | 84.01563499 | 94.77595755 | 86.65839411 | 104.1226531 | 139.9144645 | 57.13118813 | 76.2901641  | 86.40455108  |
| ENSMUSG00000031715  | 0.188833688  | 7.150297919  | 0.660482428 | 0.41638968  | 0.999071534 | Smarca5       | Smarca5       | SMARCA5  | 112.3582337 | 148.6401413  | 146.0175579 | 117.1169959 | 165.8608962 | 199.0045118 | 131.9544834 | 140.9282029 | 123.3527885 | 141.5021582  |
| ENSMUSG00000026944  | -0.217162421 | 4.176222078  | 0.660345842 | 0.416437875 | 0.999071534 | Abca2         | Abca2         | ABCA2    | 22.24707063 | 23.3602775   | 18.8496617  | 19.91266458 | 15.69661478 | 21.82864846 | 10.9368846  | 14.02373784 | 13.8280833  | 20.19592003  |
| ENSMUSG00000025968  | 0.172192371  | 6.100477702  | 0.660194499 | 0.416491286 | 0.999071534 | Ndufs1        | Ndufs1        | NDUFS1   | 69.89931341 | 68.65787142  | 62.80976558 | 62.02760325 | 71.3541947  | 97.5740586  | 84.45345799 | 49.80844818 | 57.90509881 | 65.3589645   |
| ENSMUSG00000043923  | 0.350881045  | 2.13159869   | 0.660144477 | 0.416508942 | 0.999071534 | Ccdc84        | Ccdc84        | CCDC84   | 3.228281543 | 3.438822576  | 5.318297407 | 4.371072713 | 2.943115272 | 4.875064822 | 3.688771728 | 7.875399573 | 2.749902928 | 3.92153787   |
| ENSMUSG00000022160  | 0.201059476  | 4.361496539  | 0.659951623 | 0.416577023 | 0.999071534 | Mettb3        | MettB         | METTL3   | 24.21211157 | 17.31269297  | 21.54247051 | 18.94131509 | 16.61225065 | 22.84731872 | 16.95540689 | 22.31363212 | 19.32788915 | 23.46386826  |
| ENSMUSG00000097579  | -1.062016148 | -0.721301597 | 0.659813235 | 0.416625886 | 0.999071534 | Gm26799       | Gm26799       |          | 0.631620302 | 1.126510844  | 1.346404407 | 0           | 0.196207685 | 0.363810808 | 0           | 1.105319238 | 0           | 0            |
| ENSMUSG00000083282  | -0.993722377 | -0.398022737 | 0.659772656 | 0.416640216 | 0.999071534 | Ctsf          | Ctsf          | CTSF     | 1.614140771 | 2.134441599  | 0.201960661 | 0.138764213 | 0.196207685 | 0.654859454 | 1.423736457 | 0           | 0           | 0            |
| ENSMUSG00000055200  | -0.233500721 | 3.84397577   | 0.659440667 | 0.416757478 | 0.999071534 | Sertad3       | Sertad3       | SERTAD3  | 18.31698875 | 16.9569527   | 13.53136429 | 16.16603083 | 14.84638148 | 12.22404314 | 18.96158099 | 11.26043974 | 8.249708785 | 12.74499808  |
| ENSMUSG00000026655  | -0.161212603 | 5.799634395  | 0.659415148 | 0.416766494 | 0.999071534 | Fam107b       | Fam107b       | FAM107B  | 64.00419059 | 57.68921321  | 64.08884977 | 62.79080643 | 55.52677479 | 66.14080482 | 44.13583015 | 48.97945875 | 45.64838861 | 49.47673613  |
| ENSMUSG00000031762  | -0.429936756 | 6.435148093  | 0.659093014 | 0.416880326 | 0.999071534 | Mt2           | Mt2           | MT1X     | 52.00340485 | 177.69222631 | 87.78556733 | 131.6178561 | 61.93622583 | 21.31931333 | 13.07248928 | 178.5781394 | 43.84130954 | 87.51565347  |
| ENSMUSG00000062794  | -0.460840199 | 0.854890706  | 0.658852705 | 0.416965274 | 0.999071534 | Zfp599        | Zfp599        |          | 2.38612114  | 1.007930755  | 3.635291898 | 1.665170557 | 1.373453794 | 1.819054038 | 0.711868228 | 1.657978857 | 1.257098482 | 1.372538255  |
| ENSMUSG00000031220  | 0.566782986  | 0.769971018  | 0.658833274 | 0.416972144 | 0.999071534 | Awat2         | Awat2         | AWAT2    | 1.754500839 | 1.48225111   | 2.221567271 | 0.20814632  | 1.046440986 | 0.727621615 | 1.035444696 | 1.865226215 | 3.771295445 | 1.045743432  |
| ENSMUSG00000021504  | 0.189657939  | 4.919012021  | 0.658801885 | 0.416983242 | 0.999071534 | B4gal7        | B4gal7        | B4GALT7  | 38.87973858 | 27.39200052  | 25.37972307 | 25.25508678 | 29.6273604  | 26.92199976 | 37.08186316 | 28.46197039 | 27.18475466 | 33.79058465  |
| ENSMUSG00000002325  | -0.184347574 | 4.87324269   | 0.658770279 | 0.416994417 | 0.999071534 | Irf9          | Irf9          | IRF9     | 32.6337156  | 32.43165429  | 32.24638554 | 29.07110264 | 34.92496789 | 36.74489157 | 18.37914335 | 29.29095982 | 23.57059653 | 24.77104755  |
| ENSMUSG00000083716  | -0.73460398  | 1.106590148  | 0.658625095 | 0.417045757 | 0.999071534 | Gm13436       | Gm13436       |          | 2.666841275 | 2.430891821  | 5.789538949 | 0           | 2.289089656 | 1.673529715 | 1.553167044 | 3.799534882 | 0           | 0.457512752  |
| ENSMUSG00000035325  | -0.208206504 | 7.498541231  | 0.658618993 | 0.417047914 | 0.999071534 | Sec31a        | Sec31a        | SEC31A   | 160.6420968 | 218.7209798  | 227.5423448 | 169.0841937 | 231.3942629 | 224.3985061 | 114.4166389 | 185.4863847 | 115.731629  | 181.7632803  |
| ENSMUSG00000042050  | 0.228330852  | 4.115888765  | 0.658586115 | 0.417059542 | 0.999071534 | Wdr60         | Wdr60         | WDR60    | 14.80798708 | 13.99245048  | 18.64770103 | 16.58232347 | 18.11650956 | 18.69987551 | 12.10175988 | 15.54355179 | 21.13496822 | 20.522771485 |
| ENSMUSG000000078765 | -0.226162969 | 3.850321783  | 0.658541252 | 0.417075409 | 0.999071534 | U2af14        | U2af14        | U2AF14   | 14.94834714 | 19.03210425  | 12.65620142 | 13.59889288 | 20.01318385 | 15.57110257 | 15.59638573 | 10.84594503 | 8.406846095 | 14.05217737  |
| ENSMUSG000000052488 | 0.181962838  | 5.695245747  | 0.6581875   | 0.417200554 | 0.999071534 | Cherp         | Cherp         | CHERP    | 43.58180083 | 49.44789704  | 53.04833363 | 46.69415771 | 58.73150031 | 66.21356699 | 36.6935714  | 44.35093444 | 57.43368688 | 58.88842702  |
| ENSMUSG00000090523  | -0.297767727 | 3.248077142  | 0.658059732 | 0.417245768 | 0.999071534 | Gypc          | Gypc          | GYPC     | 12.91312617 | 9.486407105  | 8.818948865 | 13.7376571  | 8.436930446 | 14.04309717 | 10.48387754 | 8.842553906 | 3.299883514 | 5.620870947  |
| ENSMUSG00000040253  | 0.248943618  | 5.644628378  | 0.657827216 | 0.417328067 | 0.999071534 | Gbp7          | Gbp7          | GBP7     | 39.65171895 | 45.0011437   | 50.9614068  | 48.98376722 | 51.73342622 | 43.22072394 | 19.54401863 | 62.24328961 | 68.35472994 | 58.75770909  |
| ENSMUSG00000072109  | -0.608135551 | 1.077808016  | 0.657784247 | 0.417343279 | 0.999071534 | A530040E14Rik | A530040E14Rik |          | 4.982782381 | 0.177870133  | 1.346404407 | 4.162926393 | 1.63506404  | 3.929156722 | 0.841298815 | 0.207247357 | 1.257098482 | 1.764692042  |
| ENSMUSG00000038224  | 0.848060875  | -0.507095178 | 0.657312175 | 0.41751025  | 0.999071534 | Serpinf2      | Serpinf2      | SERPINF2 | 0.491260235 | 0.237160178  | 0.673202203 | 0           | 0.719428178 | 0.582097292 | 0.129430587 | 1.381649048 | 0           | 1.503256184  |
| ENSMUSG00000037759  | -0.249322794 | 3.99522752   | 0.657241826 | 0.417535375 | 0.999071534 | Ptger2        | Ptger2        | PTGER2   | 21.5452703  | 19.98074497  | 12.18495988 | 19.0800793  | 16.28523784 | 9.822891806 | 14.04321869 | 14.3691501  | 16.89226085 | 12.35284429  |
| ENSMUSG00000004356  | 0.207432806  | 5.616114474  | 0.657162662 | 0.417563421 | 0.999071534 | Utp20         | Utp20         | UTP20    | 46.73990234 | 44.34895322  | 51.09604724 | 37.25819122 | 57.09643627 | 98.30168022 | 42.45323252 | 27.63298096 | 37.24154252 | 57.38517084  |
| ENSMUSG000000050079 | -0.201560548 | 4.697455867  | 0.656968149 | 0.417632345 | 0.999071534 | Rspry1        | Rspry1        | RSPRY1   | 25.61571224 | 35.15899633  | 22.08103227 | 24.28373729 | 36.69083706 | 31.43325378 | 26.92156209 | 25.56050739 | 17.44224143 | 16.07830527  |
| ENSMUSG000000001924 | -0.238506009 | 8.387713739  | 0.656808107 | 0.417689068 | 0.999071534 | Uba1          | Uba1          | UBA1     | 424.2383028 | 473.3124245  | 320.511569  | 256.0893553 | 418.8380045 | 583.5525354 | 300.0201006 | 258.7828667 | 144.8806    | 271.3050617  |
| ENSMUSG00000083718  | 0.68890872   | 1.046365929  | 0.656665837 | 0.417739502 | 0.999071534 | Ccnb2-ps      | Ccnb2-ps      | GLA      | 0.350900168 | 0.059290044  | 2.490848153 | 2.705902155 | 2.092881971 | 1.382481069 | 0.323576467 | 0.898071881 | 6.128355098 | 1.830051006  |
| ENSMUSG00000031266  | -0.262229066 | 5.959623852  | 0.65660282  | 0.417761844 | 0.999071534 | Gla           | Gla           | GLA      | 62.17950972 | 118.876539   | 51.09604724 | 56.61579894 | 63.89830268 | 32.74297269 | 59.27920883 | 98.85698938 | 31.34889338 | 47.3198903   |
| ENSMUSG00000087484  | 0.537324702  | 1.010033041  | 0.65623489  | 0.417892324 | 0.999071534 | Z900089D17Rik | Z900089D17Rik |          | 3.438821644 | 0.830060622  | 1.817645949 | 1.110113705 | 0.850233301 | 0.9459081   | 0.517722348 | 1.865226215 | 2.435628308 | 4.64048648   |
| ENSMUSG00000038762  | 0.189529286  | 6.812612012  | 0.656169674 | 0.417915458 | 0.999071534 | Abcf1         | Abcf1         | ABCF1    | 122.6746986 | 99.6072746   | 109.5299985 | 107.472883  | 105.2327216 | 168.5899282 | 92.60758497 | 84.00426211 | 120.288611  | 114.7049827  |
| ENSMUSG00000048106  | 0.244651222  | 3.663193768  | 0.655723496 | 0.418073782 | 0.999071534 | A632415L05Rik | A632415L05Rik |          | 11.9306057  | 10.19788764  | 9.559471289 | 11.44804758 | 16.54684808 | 12.58785394 | 10.03087049 | 13.88557293 | 13.19953406 | 15.03256184  |

|                     |              |              |             |             |             |          |          |          |  |             |             |             |             |             |             |             |             |             |             |
|---------------------|--------------|--------------|-------------|-------------|-------------|----------|----------|----------|--|-------------|-------------|-------------|-------------|-------------|-------------|-------------|-------------|-------------|-------------|
| ENSMUSG00000080775  | -0.513589739 | 1.617821827  | 0.655438445 | 0.418174978 | 0.999071534 | Gm6368   | Gm6368   |          |  | 3.298461576 | 5.632554219 | 1.346404407 | 3.607869541 | 3.989556257 | 4.729540499 | 3.818202315 | 1.105319238 | 0.078586655 | 2.745076509 |
| ENSMUSG00000006315  | 0.240827642  | 5.537757598  | 0.655225547 | 0.418250582 | 0.999071534 | Tmem147  | Tmem147  | TMEM147  |  | 59.51266844 | 40.61368042 | 35.27579546 | 46.90230403 | 38.06429085 | 53.6984752  | 97.84952374 | 31.98517546 | 26.55620542 | 36.66637909 |
| ENSMUSG000000091952 | 0.5486878    | 1.584705449  | 0.654702563 | 0.418436391 | 0.999071534 | Gm17709  | Gm17709  |          |  | 1.403600671 | 3.557402664 | 2.962089695 | 2.497755836 | 1.569661478 | 3.128772945 | 5.500799946 | 5.526596192 | 0           | 2.745076509 |
| ENSMUSG00000066621  | 0.249808902  | 4.880436087  | 0.654300948 | 0.418579163 | 0.999071534 | Tecpr1   | Tecpr1   | TECPR1   |  | 22.45761073 | 31.60159367 | 31.23658224 | 26.08767206 | 27.59988099 | 24.08427546 | 12.68419752 | 40.3441522  | 30.87748145 | 42.22189107 |
| ENSMUSG00000022358  | -0.327672186 | 5.026104525  | 0.653655713 | 0.418808691 | 0.999071534 | Fbxo32   | Fbxo32   | FBXO32   |  | 19.43986929 | 64.15182805 | 31.90978444 | 33.858468   | 38.19509597 | 19.57302145 | 7.830550511 | 53.05532344 | 29.07040239 | 24.83640651 |
| ENSMUSG00000049904  | 0.304857654  | 2.578045575  | 0.653458371 | 0.418878929 | 0.999071534 | Tmem17   | Tmem17   | TMEM17   |  | 7.298723488 | 3.972432975 | 5.250977187 | 5.689332737 | 4.90519212  | 4.80230266  | 7.571689337 | 7.046410144 | 5.264099892 | 6.078383699 |
| ENSMUSG00000039478  | 0.316089706  | 3.611642859  | 0.653336259 | 0.418922399 | 0.999071534 | Micu3    | Micu3    | MICU3    |  | 7.088183388 | 5.751134307 | 14.81044848 | 16.58232347 | 11.11843547 | 9.604605321 | 12.9430587  | 17.47786046 | 15.32088774 | 7.320204025 |
| ENSMUSG00000028445  | -0.587672234 | 0.26117621   | 0.653045905 | 0.41902579  | 0.999071534 | Enho     | Enho     | ENHO     |  | 1.403600671 | 0.711480533 | 1.95228639  | 1.040731598 | 1.504258917 | 2.546675653 | 0.970729402 | 0.27632981  | 0.15713731  | 0.522871716 |
| ENSMUSG00000042082  | -0.282602374 | 5.435639609  | 0.652900601 | 0.419077544 | 0.999071534 | Arsb     | Arsb     | ARSB     |  | 57.5476275  | 61.24661587 | 33.86207083 | 48.56747458 | 44.86615725 | 85.71382627 | 58.82620177 | 21.89913741 | 13.19953406 | 21.82989414 |
| ENSMUSG00000029776  | 0.169299124  | 5.684919918  | 0.652343523 | 0.419276053 | 0.999071534 | Hibadh   | Hibadh   | HIBADH   |  | 41.40621979 | 58.10424352 | 54.12545715 | 46.41662928 | 50.68698524 | 51.37008603 | 64.5211476  | 53.74614796 | 42.03423048 | 49.86888992 |
| ENSMUSG00000054428  | 0.210880501  | 7.102272704  | 0.65212726  | 0.419353154 | 0.999071534 | Atp1f1   | Atp1f1   | ATPIF1   |  | 138.8161063 | 105.1212487 | 143.3247491 | 139.31927   | 132.9634077 | 99.53863696 | 191.1689769 | 145.4185623 | 110.2318231 | 156.4040021 |
| ENSMUSG00000061518  | 0.218820274  | 7.157237132  | 0.652099651 | 0.419362998 | 0.999071534 | Cox5b    | Cox5b    | COX5B    |  | 142.3952881 | 88.04571594 | 158.7410796 | 153.2650734 | 139.7652741 | 105.0685612 | 154.9931279 | 158.7514756 | 138.045127  | 168.8222053 |
| ENSMUSG00000036427  | -0.301004806 | 9.172795274  | 0.652013555 | 0.4193937   | 0.999071534 | Gpi1     | Gpi1     | GPI      |  | 459.6090397 | 982.9696462 | 514.8650452 | 510.51354   | 853.5034288 | 312.6590081 | 269.3450515 | 963.7692933 | 333.6025095 | 574.7667339 |
| ENSMUSG000000082741 | -0.751128943 | -0.427823415 | 0.651817993 | 0.419463449 | 0.999071534 | Gm9703   | Gm9703   |          |  | 1.122880537 | 0.415030311 | 0.942483085 | 0.20814632  | 1.308051232 | 0.145524323 | 0.776583522 | 0           | 0.235705965 | 0.980384468 |
| ENSMUSG00000040528  | -0.31713758  | 3.229193526  | 0.651742332 | 0.419490438 | 0.999071534 | Mlr1     | Mlr1     | MILR1    |  | 14.87816711 | 9.664277238 | 8.886269085 | 9.019673851 | 10.98763035 | 12.87890259 | 14.8845175  | 4.90485412  | 4.32127603  | 4.182973728 |
| ENSMUSG00000034480  | -0.249113242 | 3.941567025  | 0.651578408 | 0.419548922 | 0.999071534 | Diap2    | Diap2    | DIAPH2   |  | 11.7200656  | 20.27719519 | 14.81044848 | 18.45564034 | 20.47100178 | 19.71854577 | 8.348272859 | 19.20492177 | 9.821081887 | 11.11102397 |
| ENSMUSG00000028229  | 0.313614373  | 3.277201451  | 0.651361165 | 0.419626447 | 0.999071534 | Rmdn1    | Rmdn1    | RMDN1    |  | 7.860163757 | 5.751134307 | 9.492151068 | 13.52951078 | 7.194281776 | 7.203453991 | 13.9137881  | 6.148338263 | 12.57098482 | 9.803844676 |
| ENSMUSG00000030653  | -0.316520986 | 3.970351525  | 0.651342646 | 0.419633057 | 0.999071534 | Pde2a    | Pde2a    | PDE2A    |  | 17.61518842 | 30.23792265 | 16.35881354 | 9.782877023 | 16.08903015 | 31.94258891 | 17.34369865 | 8.220811835 | 4.871256616 | 9.346331924 |
| ENSMUSG00000078921  | -0.248770551 | 5.187746722  | 0.651215698 | 0.419678371 | 0.999071534 | Tgtp2    | Tgtp2    |          |  | 54.52988606 | 48.32138619 | 38.50716604 | 41.97617446 | 21.05962483 | 41.25614558 | 16.04939278 | 27.97839322 | 23.72773384 | 53.07147918 |
| ENSMUSG00000021240  | 0.228102775  | 4.926092345  | 0.651178813 | 0.419691538 | 0.999071534 | Abcd4    | Abcd4    | ABCD4    |  | 28.98435385 | 26.38406976 | 30.42873959 | 32.95650061 | 25.44159646 | 23.93875114 | 18.8968657  | 29.49820717 | 39.99144544 | 39.93432731 |
| ENSMUSG00000041754  | -0.584960388 | 0.363984604  | 0.651138622 | 0.419705886 | 0.999071534 | Trem3    | Trem3    |          |  | 2.386122114 | 2.075151554 | 1.009803305 | 1.040731598 | 0.654025616 | 1.45524323  | 1.229590576 | 1.036236786 | 0           | 0.915025503 |
| ENSMUSG00000010608  | 0.349469189  | 8.284561367  | 0.650932984 | 0.419779311 | 0.999071534 | Rbm25    | Rbm25    | RBM25    |  | 167.5197401 | 164.8856135 | 479.2526486 | 372.9982048 | 224.0037735 | 264.1266463 | 98.43196138 | 288.4192387 | 492.2326242 | 468.6237755 |
| ENSMUSG00000040711  | -0.229445869 | 6.747270969  | 0.650786837 | 0.419831505 | 0.999071534 | Sh3pxd2b | Sh3pxd2b | SH3PXD2B |  | 141.4127676 | 166.901475  | 100.7783699 | 82.56470679 | 112.9502239 | 205.9169171 | 78.82322746 | 72.46749256 | 52.40529295 | 93.65939614 |
| ENSMUSG00000030722  | 0.343413957  | 2.721248633  | 0.650730906 | 0.419851483 | 0.999071534 | Nfatc2ip | Nfatc2ip | NFATC2IP |  | 8.561964092 | 6.99622524  | 6.328100712 | 2.89609516  | 5.690022859 | 11.13261071 | 8.73656462  | 3.799534882 | 7.385453579 | 4.248332693 |
| ENSMUSG00000039168  | -0.22032968  | 8.594751336  | 0.650460139 | 0.419948216 | 0.999071534 | Dap      | Dap      |          |  | 356.7952905 | 395.1088559 | 426.7428767 | 477.8345678 | 497.9097014 | 276.4962138 | 295.6841759 | 386.5854036 | 309.7176384 | 428.1665765 |
| ENSMUSG00000078144  | 0.552421242  | 1.662047073  | 0.650419124 | 0.419962872 | 0.999071534 | Capns2   | Capns2   | CAPNS2   |  | 2.105401006 | 1.245090933 | 2.01960661  | 5.411804311 | 1.831271725 | 0.654859454 | 0.517722348 | 4.559441858 | 6.206923753 | 4.182973728 |
| ENSMUSG00000084072  | -0.671546661 | -0.008938429 | 0.649604118 | 0.420254253 | 0.999071534 | Gm11285  | Gm11285  |          |  | 1.894860906 | 0.237160178 | 0.740522424 | 2.150845303 | 0.39241537  | 0.727621615 | 0.453007054 | 0.207247357 | 0.235705965 | 1.633974113 |
| ENSMUSG00000040423  | 0.190269938  | 5.275940334  | 0.649479675 | 0.420298771 | 0.999071534 | Rc3h1    | Rc3h1    | RC3H1    |  | 35.86199714 | 49.21073686 | 40.52677265 | 23.93682676 | 38.6529139  | 62.13888594 | 32.35764674 | 40.13690484 | 34.6487769  | 32.41804639 |
| ENSMUSG00000022887  | -0.533280864 | 3.58417373   | 0.649403397 | 0.420326061 | 0.999071534 | Masp1    | Masp1    | MASP1    |  | 18.87842902 | 36.93769767 | 3.231370576 | 4.371072713 | 10.26820217 | 26.70371328 | 16.8906916  | 4.283112048 | 1.414235792 | 2.287563758 |
| ENSMUSG00000057367  | 0.26460439   | 8.670231762  | 0.648839337 | 0.420527953 | 0.999071534 | Birc2    | Birc2    | BIRC2    |  | 370.6207571 | 422.6787266 | 370.7324534 | 307.0158215 | 456.6406851 | 240.0423709 | 337.3608249 | 746.0214034 | 275.1474302 | 512.6757176 |
| ENSMUSG00000037808  | 0.186012654  | 4.974771212  | 0.648740283 | 0.420563422 | 0.999071534 | Fam76b   | Fam76b   | FAM76B   |  | 36.84451761 | 24.78323856 | 25.71632417 | 33.02588272 | 31.65483981 | 37.54527535 | 40.83535019 | 35.02480336 | 20.19214436 | 29.2808161  |
| ENSMUSG00000022779  | 0.195104516  | 4.646967628  | 0.648739593 | 0.420563669 | 0.999071534 | Top3b    | Top3b    | TOP3B    |  | 25.05427197 | 28.75567154 | 22.75423448 | 16.85985189 | 27.86149124 | 33.90716727 | 22.7797833  | 30.39627905 | 15.71373102 | 27.90827784 |
| ENSMUSG00000032231  | -0.20482869  | 10.4477015   | 0.648695451 | 0.420579476 | 0.999071534 | Anxa2    | Anxa2    | ANXA2    |  | 1680.320543 | 1655.79307  | 1480.035044 | 1463.338009 | 1488.889315 | 1427.739133 | 1525.727759 | 1310.14871  | 778.7725093 | 1298.486548 |
| ENSMUSG00000041264  | 0.174272548  | 5.117254385  | 0.648607382 | 0.420611017 | 0.999071534 | Uspl1    | Uspl1    | USPL1    |  | 34.66893657 | 40.13936006 | 30.36141937 | 35.45425645 | 27.79608868 | 44.09386988 | 41.41778783 | 31.43251584 | 25.6138156  | 36.53566116 |
| ENSMUSG00000028329  | 0.258188438  | 3.757323414  | 0.648570948 | 0.420624067 | 0.999071534 | Xpa      | Xpa      | XPA      |  | 9.544484562 | 10.5536279  | 13.66600473 | 15.26406344 | 13.99614818 | 10.04117829 | 11.51932224 | 21.07014798 | 11.86386692 | 14.64040805 |
| ENSMUSG00000071014  | 0.217818506  | 6.319971402  | 0.648091821 | 0.420795731 | 0.999071534 | Ndufb6   | Ndufb6   | NDUFB6   |  | 82.25099931 | 59.46791454 | 86.64112358 | 92.83325856 | 59.64713618 | 56.90001031 | 115.9050906 | 68.25346297 | 87.60405043 | 75.09745022 |
| ENSMUSG00000031691  | -0.175202948 | 5.896216284  | 0.647866824 | 0.420876379 | 0.999071534 | Tnpo2    | Tnpo2    | TNPO2    |  | 64.21473069 | 81.64239115 | 64.62741153 | 50.37140935 | 67.49544357 | 85.71382627 | 43.55339251 | 55.95678644 | 34.80591421 | 56.73158119 |
| ENSMUSG00000019948  | 0.283936123  | 4.125178484  | 0.64776034  | 0.420914556 | 0.999071534 | Actr6    | Actr6    | ACTR6    |  | 17.82572852 | 19.68429474 | 13.80064517 | 12.35001497 | 17.78949675 | 23.0656052  | 39.41161373 | 11.26043974 | 8.092571475 | 12.67963911 |
| ENSMUSG00000024393  | -0.230392809 | 7.65184212   | 0.647721578 | 0.420928454 | 0.999071534 | Prrc2a   | Prrc2a   | PRRC2A   |  | 229.2079895 | 247.061615  | 238.5828609 | 168.8066652 | 247.2216828 | 376.8352345 | 126.7772599 | 148.3200253 | 107.4033515 | 178.4953321 |

|                      |              |             |             |             |             |         |         |              |             |             |              |             |             |             |             |             |             |             |
|----------------------|--------------|-------------|-------------|-------------|-------------|---------|---------|--------------|-------------|-------------|--------------|-------------|-------------|-------------|-------------|-------------|-------------|-------------|
| ENSMUSG00000025240   | 0.205660995  | 6.05016101  | 0.647721005 | 0.42092866  | 0.999071534 | Sacm1l  | Sacm1l  | SACM1L       | 58.88104814 | 78.32214866 | 44.76794653  | 60.08490427 | 77.50203549 | 75.74541014 | 107.6215331 | 70.18777163 | 36.84869924 | 56.99301705 |
| ENSMUSG00000004937   | -0.202898201 | 6.322214781 | 0.647589955 | 0.420975653 | 0.999071534 | Sgta    | Sgta    | SGTA         | 92.28674411 | 105.7141492 | 78.22609604  | 59.59922953 | 110.8573419 | 94.08147485 | 79.66452627 | 97.26809297 | 35.04162017 | 60.71847803 |
| ENSMUSG000000024399  | -0.341396783 | 2.304721113 | 0.647537537 | 0.420994452 | 0.999071534 | Ltb     | Ltb     | LTB          | 8.491784059 | 4.98036373  | 5.318297407  | 4.371072713 | 4.839789558 | 8.731459383 | 3.882917609 | 2.141556024 | 2.749902928 | 3.92153787  |
| ENSMUSG000000022814  | 0.192344213  | 5.247326157 | 0.647379536 | 0.421051125 | 0.999071534 | Umps    | Umps    | UMPS         | 43.09054059 | 33.73603527 | 33.72743039  | 36.70313436 | 36.23301912 | 59.22839948 | 52.6135336  | 23.34986891 | 27.18475466 | 37.51604563 |
| ENSMUSG000000051185  | -0.209442162 | 5.035320895 | 0.647210404 | 0.421111802 | 0.999071534 | Fam174a | Fam174a | FAM174A      | 45.05558153 | 27.62916069 | 28.40913298  | 48.56747458 | 31.19702188 | 28.66829164 | 39.34689844 | 28.7383002  | 26.71334273 | 21.63381725 |
| ENSMUSG000000038544  | 0.220526167  | 4.147927012 | 0.647148861 | 0.421133884 | 0.999071534 | Inip    | Inip    | INIP         | 19.36968926 | 14.70393101 | 15.5509709   | 14.91715291 | 20.07858641 | 25.17570789 | 26.66270091 | 12.36575898 | 13.43524002 | 15.42471562 |
| ENSMUSG000000037855  | -0.39686917  | 1.660169972 | 0.647074746 | 0.42116048  | 0.999071534 | Zfp365  | Zfp365  | ZNF365       | 4.842422314 | 2.845922132 | 3.702612119  | 2.914048475 | 3.597140888 | 4.511254014 | 3.559341141 | 1.72706131  | 0.628549241 | 2.810435474 |
| ENSMUSG000000028410  | 0.209169392  | 7.537073399 | 0.647019358 | 0.421180357 | 0.999071534 | Dnaja1  | Dnaja1  | DNAJA1       | 152.3608528 | 162.7511179 | 174.0900898  | 197.0451826 | 205.6910562 | 243.9715276 | 236.1461059 | 120.8942917 | 180.2364948 | 183.4626134 |
| ENSMUSG000000031953  | 0.424389115  | 1.88787957  | 0.646831143 | 0.421247912 | 0.999071534 | Tmem170 | Tmem170 | RP11-77K12.1 | 2.105401006 | 1.600831199 | 4.6450095204 | 5.203657991 | 2.092881971 | 2.692199976 | 4.335924663 | 2.625133191 | 6.442629718 | 2.745076509 |
| ENSMUSG000000035069  | 0.349354442  | 2.873229608 | 0.646724477 | 0.421286204 | 0.999071534 | Oma1    | Oma1    | OMA1         | 8.772504193 | 6.403324796 | 2.962089695  | 8.117706466 | 6.54025616  | 9.459080998 | 14.62565633 | 7.529987311 | 4.478413341 | 3.529384083 |
| ENSMUSG000000066975  | 0.396117805  | 1.499896825 | 0.646659727 | 0.421309452 | 0.999071534 | Cryba4  | Cryba4  | CRYBA4       | 2.245761073 | 1.541541155 | 2.962089695  | 3.191576901 | 2.092881971 | 2.983248622 | 3.235764674 | 2.141556024 | 4.242707375 | 1.830051006 |
| ENSMUSG000000081788  | -0.710955875 | 0.583144519 | 0.646649858 | 0.421312995 | 0.999071534 | Gm5898  | Gm5898  |              | 2.526481208 | 3.083082309 | 1.144443746  | 0           | 2.092881971 | 2.837724299 | 0.906014109 | 0.828989429 | 0           | 0.849666539 |
| ENSMUSG000000038608  | 0.282441896  | 3.456580319 | 0.646447545 | 0.421385646 | 0.999071534 | Dock10  | Dock10  | DOCK10       | 11.22880537 | 10.25717768 | 8.751628644  | 12.62754339 | 7.717502268 | 20.30064306 | 12.03704459 | 5.112101477 | 11.15674902 | 10.1306395  |
| ENSMUSG000000022247  | 0.178231616  | 6.16805162  | 0.646344619 | 0.421422613 | 0.999071534 | Brix1   | Brix1   | BRX1         | 74.39083555 | 65.93052938 | 82.33262948  | 61.95822115 | 65.27175647 | 94.15423701 | 103.1561778 | 56.44036361 | 52.87670488 | 66.66614379 |
| ENSMUSG000000020641  | -0.278541331 | 3.883994934 | 0.646282621 | 0.421444883 | 0.999071534 | Rsad2   | Rsad2   | RSAD2        | 14.52726694 | 23.53814763 | 18.98430214  | 16.23541293 | 9.744981678 | 19.71854577 | 6.665675228 | 18.79042705 | 10.68533709 | 8.758101244 |
| ENSMUSG000000075706  | 0.242900303  | 9.488202874 | 0.645386883 | 0.421766834 | 0.999071534 | Gpx4    | Gpx4    | GPX4         | 808.4038064 | 518.1949881 | 640.9558179  | 786.5155598 | 651.4095135 | 470.9894715 | 1013.24735  | 633.0025113 | 811.6142072 | 721.0400964 |
| ENSMUSG000000002297  | 0.201448795  | 6.036234241 | 0.645346156 | 0.421781481 | 0.999071534 | Dbf4    | Dbf4    | DBF4         | 61.96896962 | 39.2500094  | 88.93001107  | 58.76664425 | 67.23383332 | 95.46395592 | 78.4349357  | 44.35093444 | 48.79113482 | 77.90788569 |
| ENSMUSG000000029480  | -0.234396712 | 4.558085925 | 0.645158812 | 0.421848867 | 0.999071534 | Dhx37   | Dhx37   | DHX37        | 25.61571224 | 24.07175803 | 24.10063888  | 27.47531419 | 30.1505809  | 45.98568608 | 18.05556688 | 11.74401691 | 13.43524002 | 20.19592003 |
| ENSMUSG000000060703  | 0.320917166  | 3.417885168 | 0.644952066 | 0.42192325  | 0.999071534 | Cd302   | Cd302   | CD302        | 14.73780704 | 5.158233863 | 6.664701814  | 12.97445392 | 9.0255535   | 17.0263458  | 19.22044216 | 5.941090906 | 6.049786443 | 10.26135743 |
| ENSMUSG000000062190  | 0.253549437  | 3.845568166 | 0.64477883  | 0.421985593 | 0.999071534 | Lanc12  | Lanc12  | LANCL2       | 16.14140771 | 14.17032061 | 12.5888812   | 11.17051915 | 13.60373281 | 28.81381596 | 18.70271982 | 8.35897674  | 11.39245499 | 10.32671639 |
| ENSMUSG000000028688  | 0.232922451  | 3.943208201 | 0.64472066  | 0.422006529 | 0.999071534 | Toe1    | Toe1    | TOE1         | 16.56248792 | 12.45090933 | 16.2241731   | 11.30928337 | 16.48144552 | 18.84539983 | 19.8675951  | 11.19135729 | 17.52081009 | 11.56853672 |
| ENSMUSG000000042548  | -0.18695146  | 5.419691102 | 0.644661526 | 0.422027815 | 0.999071534 | Asx1    | Asx1    | ASXL1        | 50.66998422 | 52.64955943 | 46.9895138   | 35.24611013 | 51.27560829 | 58.35525354 | 24.65652682 | 46.35432556 | 29.2275397  | 37.3853277  |
| ENSMUSG000000031239  | 0.624791788  | 2.847970472 | 0.644433832 | 0.422109788 | 0.999071534 | Itm2a   | Itm2a   | ITM2A        | 15.43960738 | 3.201662398 | 3.298690797  | 3.052812688 | 4.185763942 | 9.895653967 | 26.85684679 | 0.069082452 | 2.907040239 | 3.202589261 |
| ENSMUSG000000000386  | -0.3680419   | 2.79275439  | 0.644424902 | 0.422113003 | 0.999071534 | Mx1     | Mx1     | MX1          | 6.035482885 | 6.46261484  | 4.308494102  | 5.61995063  | 5.166802366 | 6.766881022 | 1.229590576 | 4.62852431  | 1.885647722 | 6.078383699 |
| ENSMUSG000000032011  | -0.264214774 | 4.371527292 | 0.644367408 | 0.422133706 | 0.999071534 | Thy1    | Thy1    | THY1         | 37.12523774 | 33.08384478 | 21.60979073  | 10.75422652 | 14.97718661 | 26.99476192 | 19.34987275 | 22.38271458 | 9.821081887 | 14.11753633 |
| ENSMUSG0000000040033 | 0.240283269  | 5.394431895 | 0.644309767 | 0.422154463 | 0.999071534 | Stat2   | Stat2   | STAT2        | 48.35404311 | 36.048347   | 36.68952009  | 36.77251647 | 42.05384711 | 39.87366451 | 16.04939278 | 58.37467227 | 44.15558417 | 56.60086326 |
| ENSMUSG000000032135  | -0.213342425 | 5.977294483 | 0.644279768 | 0.422165267 | 0.999071534 | Mcarn   | Mcarn   | MCAM         | 75.02245586 | 93.67827016 | 65.23329351  | 59.3217011  | 57.88126701 | 96.6281505  | 83.15915212 | 40.3441522  | 32.3702859  | 39.47681456 |
| ENSMUSG000000028796  | -0.205332665 | 7.099296032 | 0.643916937 | 0.422295966 | 0.999071534 | Phc2    | Phc2    | PHC2         | 171.590182  | 117.9871884 | 177.523421   | 162.3541293 | 130.3473053 | 208.9729279 | 123.929787  | 82.89894287 | 99.86076063 | 114.5089058 |
| ENSMUSG000000082319  | -0.462147588 | 0.842410467 | 0.643898865 | 0.422302478 | 0.999071534 | Gm8822  | Gm8822  |              | 1.614140771 | 2.253021687 | 1.88496617   | 2.636520049 | 1.504258917 | 1.8918162   | 2.588611739 | 1.312566595 | 0.471411931 | 0.653589645 |
| ENSMUSG000000005982  | -0.219767793 | 4.730514424 | 0.643843771 | 0.42232233  | 0.999071534 | Naa60   | Naa60   | NAA60        | 34.5285765  | 34.68467598 | 23.29279624  | 20.39833933 | 35.64439607 | 40.16471316 | 25.17424916 | 24.59335305 | 9.978219197 | 22.87563758 |
| ENSMUSG0000000041570 | -0.207222852 | 5.279584049 | 0.643430592 | 0.422471253 | 0.999071534 | Camsap2 | Camsap2 | CAMSPAP2     | 36.63397751 | 59.23075436 | 30.63070026  | 36.98066279 | 52.58365952 | 57.99144273 | 28.66887501 | 43.52194501 | 21.21353688 | 27.32004716 |
| ENSMUSG000000068397  | -0.881259829 | 0.842450284 | 0.643205395 | 0.422552455 | 0.999071534 | Gm10240 | Gm10240 |              | 0.210540101 | 0           | 0.538561763  | 4.579219032 | 5.75542542  | 0           | 2.135604685 | 1.243484143 | 1.728510412 | 0.130717929 |
| ENSMUSG000000035967  | 0.247060448  | 3.92464256  | 0.643123608 | 0.422581952 | 0.999071534 | Ddx26b  | Ddx26b  | INTS6L       | 15.93086761 | 11.6208487  | 14.40652715  | 14.91715291 | 14.51936867 | 12.22404314 | 9.577863435 | 20.1720761  | 15.47802505 | 19.73840728 |
| ENSMUSG000000084383  | -0.881259168 | 0.842450284 | 0.643121988 | 0.422582536 | 0.999071534 | Gm13370 | Gm13370 |              | 0.210540101 | 0           | 0.538561763  | 4.579219032 | 5.75542542  | 0           | 2.135604685 | 1.243484143 | 1.728510412 | 0.130717929 |
| ENSMUSG000000060152  | 0.264916851  | 4.579407239 | 0.642903054 | 0.42266151  | 0.999071534 | Pop5    | Pop5    | POP5         | 30.73885469 | 15.11896132 | 20.59998742  | 24.97755836 | 20.53640434 | 25.39399437 | 43.35924663 | 10.0169556  | 22.78490998 | 23.52922722 |
| ENSMUSG000000026098  | 0.357600522  | 1.997859133 | 0.642781578 | 0.422705339 | 0.999071534 | Pms1    | Pms1    | PMS1         | 3.930081878 | 2.134441599 | 3.500651458  | 5.61995063  | 2.223687094 | 4.511254014 | 5.371369359 | 3.246875263 | 3.8498641   | 3.92153787  |
| ENSMUSG000000032625  | 0.437652207  | 0.784547935 | 0.642742627 | 0.422719394 | 0.999071534 | Thsd7a  | Thsd7a  | THSD7A       | 1.473780704 | 1.660121243 | 1.750325729  | 1.457024238 | 0.654025616 | 1.673529715 | 1.747312924 | 2.072473572 | 1.807079067 | 1.437897219 |
| ENSMUSG000000084824  | 0.37173442   | 2.734809108 | 0.642513665 | 0.422802026 | 0.999071534 | Gm16344 | Gm16344 |              | 4.842422314 | 3.675982753 | 8.953589305  | 4.440454819 | 7.717502268 | 6.69411886  | 2.394465859 | 5.526596192 | 11.5495923  | 7.908434705 |
| ENSMUSG000000034021  | 0.177122109  | 6.021706252 | 0.642500908 | 0.422806631 | 0.999071534 | Pds5b   | Pds5b   | PDS5B        | 66.24995166 | 66.46413978 | 58.9051928   | 57.72591265 | 67.1030282  | 98.5199667  | 86.97735444 | 54.09156022 | 49.96966464 | 49.3460182  |

|                     |              |              |             |             |             |               |               |         |             |             |             |             |             |             |             |             |             |             |
|---------------------|--------------|--------------|-------------|-------------|-------------|---------------|---------------|---------|-------------|-------------|-------------|-------------|-------------|-------------|-------------|-------------|-------------|-------------|
| ENSMUSG00000020836  | 0.476716813  | 1.198479945  | 0.641986151 | 0.422992497 | 0.999071534 | Coro6         | Coro6         | CORO6   | 1.403600671 | 1.956571465 | 2.356207712 | 1.595788451 | 2.092881971 | 1.746291877 | 0.517722348 | 5.664761096 | 1.964216377 | 2.02612729  |
| ENSMUSG000000027465 | -0.180264532 | 6.206626119  | 0.641961689 | 0.423001333 | 0.999071534 | Tbc1d20       | Tbc1d20       | TBC1D20 | 82.18081928 | 102.868227  | 69.67642805 | 65.56609069 | 87.77023766 | 98.22891806 | 58.89091707 | 77.99408875 | 39.20575889 | 67.64652826 |
| ENSMUSG000000057182 | 0.772761322  | -0.434074194 | 0.641819847 | 0.423052571 | 0.999071534 | Scn3a         | Scn3a         | SCN3A   | 0.421080201 | 0.296450222 | 1.211763966 | 0.416292639 | 0           | 0.509335131 | 0.064715293 | 0.828989429 | 1.099961171 | 1.111102397 |
| ENSMUSG000000043154 | 0.213075171  | 5.488119352  | 0.641295535 | 0.423242054 | 0.999071534 | Ppp2r3a       | Ppp2r3a       | PPP2R3A | 26.94913288 | 43.04457224 | 52.98101341 | 43.64134502 | 48.07088277 | 47.36816715 | 26.46855503 | 49.60120082 | 49.26254675 | 55.68583776 |
| ENSMUSG000000031659 | -0.178429137 | 5.80156389   | 0.641244929 | 0.42326035  | 0.999071534 | Adcy7         | Adcy7         | ADCY7   | 57.96870771 | 80.39730022 | 55.606502   | 51.55090517 | 61.93622583 | 87.31459383 | 52.09581125 | 41.44947144 | 32.52742321 | 47.25453134 |
| ENSMUSG000000032869 | -0.201618271 | 4.369958361  | 0.64033626  | 0.423589059 | 0.999071534 | Psmf1         | Psmf1         | PSMF1   | 19.65040939 | 23.30098745 | 24.77384109 | 18.38625824 | 28.31930917 | 27.06752409 | 15.79053161 | 21.89913741 | 11.23531768 | 18.36586903 |
| ENSMUSG000000024421 | 0.625926833  | 0.160601894  | 0.640321549 | 0.423594384 | 0.999071534 | Lama3         | Lama3         | LAMA3   | 0.701800335 | 1.363671021 | 1.009803305 | 0           | 0.981038424 | 1.819054038 | 1.747312924 | 0.898071881 | 1.021392516 | 0.392153787 |
| ENSMUSG000000063801 | -0.185220242 | 4.75169304   | 0.640144811 | 0.423658364 | 0.999071534 | Ap3s2         | Ap3s2         | AP3S2   | 32.91443573 | 35.15899633 | 25.91828483 | 27.47531419 | 26.74964769 | 31.50601594 | 28.34529854 | 17.408778   | 20.97783091 | 23.85602204 |
| ENSMUSG000000021831 | -0.351336682 | 8.05666414   | 0.639953513 | 0.423727631 | 0.999071534 | Ero1l         | Ero1l         | ERO1A   | 183.3102476 | 620.4110247 | 219.665879  | 202.526369  | 331.787195  | 79.38351822 | 145.6094103 | 455.4606086 | 158.0015654 | 257.710397  |
| ENSMUSG000000057036 | 0.235544968  | 9.792447083  | 0.639861773 | 0.423760856 | 0.999071534 | Gm7536        | Gm7536        |         | 843.5640032 | 716.6387667 | 805.6210768 | 1049.404362 | 792.6790465 | 566.235141  | 945.4257224 | 1082.176617 | 929.9386017 | 974.5021608 |
| ENSMUSG000000060227 | 0.321004558  | 3.439937019  | 0.639852032 | 0.423764383 | 0.999071534 | Casc4         | Casc4         | CASC4   | 7.298723488 | 4.921073686 | 14.13724627 | 14.91715291 | 7.652099707 | 15.64386473 | 7.44225875  | 8.08264693  | 16.02800564 | 9.411690889 |
| ENSMUSG000000038415 | 0.653101822  | 1.809051379  | 0.63974626  | 0.423802695 | 0.999071534 | Foxq1         | Foxq1         | FOXQ1   | 0.842160403 | 3.201662398 | 1.615685288 | 3.469105327 | 4.447374189 | 0.072762162 | 0.453007054 | 12.29667653 | 1.964216377 | 4.379050622 |
| ENSMUSG000000026958 | 0.219814847  | 4.077269142  | 0.639716554 | 0.423813456 | 0.999071534 | Dpp7          | Dpp7          | DPP7    | 13.89564664 | 20.75151554 | 16.5607742  | 13.94580342 | 15.23879685 | 14.33414582 | 18.18499747 | 21.69189005 | 12.41384751 | 19.86912521 |
| ENSMUSG000000039377 | -0.247426431 | 3.552293702  | 0.639708157 | 0.423816497 | 0.999071534 | Hlk           | Hlk           | HLX     | 12.562226   | 13.7552903  | 14.00260583 | 11.93372233 | 13.14591488 | 17.17187012 | 7.118682283 | 12.64208879 | 6.128355098 | 9.673126747 |
| ENSMUSG000000029169 | 0.214697956  | 7.197597899  | 0.639126162 | 0.424027404 | 0.999071534 | Dhx15         | Dhx15         | DHX15   | 161.6246172 | 173.3047998 | 108.1835941 | 120.5167191 | 143.4278176 | 248.9921167 | 211.2307179 | 110.1865116 | 97.42513232 | 117.4500592 |
| ENSMUSG000000021258 | -0.197588049 | 4.527750386  | 0.638897862 | 0.424110179 | 0.999071534 | Ccnk          | Ccnk          | CCNK    | 24.00157147 | 30.59366291 | 25.85096461 | 22.13289199 | 24.72216828 | 26.63095112 | 14.10793398 | 20.58657081 | 20.11357571 | 21.69917622 |
| ENSMUSG000000001552 | -0.291342352 | 4.543334959  | 0.638758335 | 0.42416078  | 0.999071534 | Jup           | Jup           | JUP     | 18.52752886 | 35.04041624 | 30.29409915 | 21.85536356 | 26.88045282 | 36.59936725 | 5.371369359 | 29.36004227 | 12.96382809 | 19.54233039 |
| ENSMUSG000000030965 | 0.178790849  | 4.78384326   | 0.6386718   | 0.424192167 | 0.999071534 | Fam175b       | Fam175b       | FAM175B | 24.63319177 | 31.48301358 | 26.99540836 | 25.67137942 | 24.65676572 | 32.16087539 | 30.67504911 | 23.00445665 | 23.49202787 | 31.63373882 |
| ENSMUSG000000042055 | 0.174282909  | 4.921546148  | 0.6384648   | 0.424267263 | 0.999071534 | Wdr11         | Wdr11         | WDR11   | 34.80929664 | 28.87425163 | 26.65880726 | 24.70002993 | 32.63587824 | 42.05652936 | 24.91538799 | 32.39967017 | 24.35628308 | 32.48340536 |
| ENSMUSG000000021038 | -0.247093253 | 4.076137025  | 0.638320607 | 0.424319585 | 0.999071534 | Vipas39       | Vipas39       | VIPAS39 | 26.31751258 | 22.2930567  | 17.43593707 | 11.86434022 | 17.00466601 | 29.32315109 | 15.01394809 | 8.842553906 | 9.742513232 | 14.1828953  |
| ENSMUSG000000083391 | -0.536488051 | 0.529225763  | 0.638295889 | 0.424328555 | 0.999071534 | Gm14148       | Gm14148       |         | 0.701800335 | 2.54947191  | 1.077123525 | 1.179495811 | 2.550699902 | 0.363810808 | 1.035444696 | 2.003391119 | 1.021392516 | 0.522871716 |
| ENSMUSG000000048833 | 0.194636183  | 4.758208792  | 0.638190925 | 0.424366649 | 0.999071534 | Slc39a9       | Slc39a9       | SLC39A9 | 27.51057315 | 29.82289234 | 22.21567271 | 21.64721724 | 29.6273604  | 48.09578877 | 26.20969386 | 25.21509512 | 22.70634132 | 19.99984314 |
| ENSMUSG000000038615 | -0.207733161 | 8.060783655  | 0.638150402 | 0.424381358 | 0.999071534 | Nfe2l1        | Nfe2l1        | NFE2L1  | 264.0172862 | 375.2466911 | 257.9037641 | 269.0638092 | 321.0611749 | 281.5168029 | 183.1442805 | 272.7375221 | 216.1423702 | 239.7366818 |
| ENSMUSG000000027778 | 0.180213319  | 4.892521019  | 0.637947479 | 0.424455023 | 0.999071534 | Ift80         | Ift80         | IFT80   | 23.58049127 | 29.28928194 | 24.77384109 | 30.38936267 | 35.77520119 | 32.5246862  | 28.15115266 | 32.33058772 | 27.34189197 | 30.58799539 |
| ENSMUSG000000004035 | -0.600802597 | 0.236357659  | 0.637706091 | 0.424542678 | 0.999071534 | Gstm7         | Gstm7         | GSTM2   | 0.280720134 | 1.719411288 | 0.605881983 | 2.567137942 | 1.24264867  | 1.018670261 | 0.582437641 | 0.207247357 | 0.707117896 | 1.503256184 |
| ENSMUSG000000057465 | -0.599900094 | 0.046423004  | 0.637170435 | 0.424737285 | 0.999071534 | Saa2          | Saa2          |         | 0.771980369 | 1.185800888 | 1.481044848 | 1.110113705 | 1.046440986 | 0.654859454 | 0.064715293 | 1.588896405 | 0.392843275 | 0.71894861  |
| ENSMUSG000000035236 | 0.248010555  | 4.42371324   | 0.63708627  | 0.424767875 | 0.999071534 | Scal          | Scal          | SCAI    | 16.56248792 | 20.33648523 | 15.28169002 | 26.29581838 | 22.23687094 | 14.04309717 | 18.12028217 | 27.21848624 | 28.67755911 | 19.1501766  |
| ENSMUSG000000097327 | 0.452369469  | 1.203764347  | 0.636909189 | 0.424832246 | 0.999071534 | E030030I06Rik | E030030I06Rik |         | 0.771980369 | 1.304380977 | 1.817645949 | 2.914048475 | 2.616102464 | 2.255627007 | 2.135604685 | 3.523205072 | 0.707117896 | 3.660102012 |
| ENSMUSG000000024414 | 0.187874497  | 6.227645658  | 0.636668347 | 0.424919818 | 0.999071534 | Mrpl27        | Mrpl27        | MRPL27  | 72.91705485 | 57.8077933  | 71.35943356 | 83.6748205  | 76.25938682 | 59.3739238  | 86.91263914 | 67.07906127 | 75.26877158 | 88.88819173 |
| ENSMUSG000000029442 | 0.498474366  | 0.969895914  | 0.63663207  | 0.424933011 | 0.999071534 | Wdr66         | Wdr66         | WDR66   | 1.543960738 | 0.652190488 | 1.817645949 | 2.358991623 | 1.438856355 | 0.727621615 | 0.906014109 | 2.348803381 | 1.649941757 | 4.444409586 |
| ENSMUSG000000048458 | 0.954705753  | -0.765186413 | 0.636517646 | 0.424974628 | 0.999071534 | Fam212b       | Fam212b       | FAM212B | 0           | 0.296450222 | 1.144443746 | 0           | 0.196207685 | 0.582097292 | 0.323576467 | 0           | 1.099961171 | 0.849666539 |
| ENSMUSG000000022881 | 0.222404605  | 5.325624414  | 0.636389796 | 0.425021136 | 0.999071534 | Rfc4          | Rfc4          | RFC4    | 48.14350301 | 27.86632087 | 38.77644692 | 37.67448386 | 39.1761344  | 50.06036713 | 71.51039929 | 21.69189005 | 33.70595304 | 32.81020018 |
| ENSMUSG000000094945 | -0.517931406 | 2.563622897  | 0.636358567 | 0.425032497 | 0.999071534 | Gm21098       | Rhox4a2       |         | 5.54422265  | 4.328173242 | 9.424830848 | 10.47669809 | 5.166802366 | 5.020589145 | 7.183397576 | 0           | 5.421237202 | 5.097999231 |
| ENSMUSG000000022032 | 0.719380118  | -0.191106884 | 0.636322571 | 0.425045593 | 0.999071534 | Scara5        | Scara5        | SCARAS  | 0.421080201 | 0.770770577 | 0           | 1.387642131 | 0.327012808 | 0.509335131 | 0.258861174 | 1.105319238 | 1.571373102 | 0.849666539 |
| ENSMUSG000000028837 | 0.185985076  | 6.652998566  | 0.636020894 | 0.425155373 | 0.999071534 | Psmb2         | Psmb2         | PSMB2   | 98.60294713 | 77.13634777 | 109.5973187 | 103.518103  | 98.36545264 | 103.8316045 | 148.3274527 | 85.1786638  | 79.51147896 | 100.3913695 |
| ENSMUSG000000017721 | -0.326653216 | 5.801578041  | 0.63585635  | 0.425215268 | 0.999071534 | Pigt          | Pigt          | PIGT    | 94.11142498 | 82.82819204 | 45.64310939 | 48.01241773 | 52.51825696 | 119.7665179 | 74.55201809 | 21.7609725  | 10.44963113 | 32.87555915 |
| ENSMUSG000000097990 | -0.654578612 | -0.30449053  | 0.63566648  | 0.425284398 | 0.999071534 | Gm19557       | Gm19557       |         | 1.473780704 | 0.5336104   | 0.673202203 | 0.693821065 | 0.915635862 | 0.291048646 | 1.100159989 | 0.552659619 | 0           | 0.588230681 |
| ENSMUSG000000031730 | 0.253572814  | 3.813966124  | 0.63559743  | 0.425309543 | 0.999071534 | Dhodh         | Dhodh         | DHODH   | 18.66788892 | 9.367827016 | 15.34901024 | 10.89299073 | 11.90326621 | 22.1196971  | 17.861421   | 8.428059192 | 8.956826681 | 17.90835627 |
| ENSMUSG000000024910 | -0.365667882 | 1.950673612  | 0.635384875 | 0.425386959 | 0.999071534 | Ctsw          | Ctsw          | CTSW    | 3.228281543 | 4.150303108 | 4.914376085 | 5.758714844 | 3.597140888 | 3.856394561 | 2.006174098 | 1.657978857 | 3.064177549 | 5.163358196 |

|                     |              |              |             |             |             |               |               |           |             |             |             |             |             |             |             |             |             |             |
|---------------------|--------------|--------------|-------------|-------------|-------------|---------------|---------------|-----------|-------------|-------------|-------------|-------------|-------------|-------------|-------------|-------------|-------------|-------------|
| ENSMUSG00000043243  | 0.323860765  | 2.672493512  | 0.635321131 | 0.425410179 | 0.999071534 | Fam129c       | Fam129c       | FAM129C   | 6.456563086 | 4.03172302  | 7.135943356 | 4.162926393 | 7.128879214 | 6.69411886  | 2.9769035   | 7.322739954 | 7.071178959 | 8.954178137 |
| ENSMUSG00000035697  | -0.248165345 | 4.823652308  | 0.635171236 | 0.425464791 | 0.999071534 | Hmha1         | Hmha1         | ARHGAP45  | 41.26585972 | 36.81911758 | 27.19736902 | 17.48429085 | 37.54107036 | 45.7673996  | 20.45003274 | 25.49142493 | 8.563983406 | 30.45727746 |
| ENSMUSG00000029217  | -0.451155799 | 3.07532939   | 0.635012085 | 0.425522786 | 0.999071534 | Tec           | Tec           | TEC       | 12.98330621 | 19.92145492 | 6.193460271 | 3.122194795 | 8.044515076 | 14.77071879 | 10.67802342 | 7.460904859 | 0.785686551 | 2.61435858  |
| ENSMUSG00000001348  | 0.461717004  | 7.380221566  | 0.63494778  | 0.425546223 | 0.999071534 | Acp5          | Acp5          | ACP5      | 379.1125412 | 67.76852076 | 108.8567963 | 64.94165173 | 115.8279366 | 174.9929985 | 591.6919283 | 75.09262575 | 39.44146486 | 81.17583392 |
| ENSMUSG00000042379  | -0.440726516 | 1.603623906  | 0.634930475 | 0.425555253 | 0.999071534 | Esm1          | Esm1          | ESM1      | 3.36864161  | 4.209593153 | 0.740522424 | 2.567137942 | 6.605658721 | 2.983248622 | 3.17104938  | 0.967154334 | 2.042785033 | 2.810435474 |
| ENSMUSG00000030203  | -0.262013654 | 3.95857038   | 0.634890526 | 0.425567091 | 0.999071534 | Dusp16        | Dusp16        | DUSP16    | 25.33499211 | 26.08761954 | 12.2522801  | 10.12978756 | 14.1269533  | 23.79322682 | 13.13720458 | 13.47107822 | 10.21392516 | 8.954178137 |
| ENSMUSG000000066175 | -0.722333168 | 0.078290686  | 0.634868579 | 0.425575091 | 0.999071534 | 2510046G10Rik | 2510046G10Rik |           | 1.403600671 | 0.177870133 | 0.807842644 | 2.497755836 | 0.981038424 | 0.291048646 | 1.423736457 | 0           | 0.31427462  | 1.30717929  |
| ENSMUSG00000031078  | -0.209339835 | 7.765973044  | 0.634757008 | 0.425615762 | 0.999071534 | Ctnn          | Ctnn          | CTTN      | 252.5779407 | 307.1817201 | 173.2149269 | 207.1749702 | 275.2139792 | 311.1310027 | 180.7498147 | 180.8578604 | 121.6242781 | 208.5604557 |
| ENSMUSG000000041147 | 0.263722081  | 3.44515887   | 0.634711793 | 0.425632246 | 0.999071534 | Brca2         | Brca2         | BRCA2     | 11.9306057  | 6.640484974 | 13.19476319 | 7.978942253 | 11.18383803 | 19.35473496 | 10.35444696 | 10.43145031 | 6.128355098 | 12.48356222 |
| ENSMUSG00000026615  | 0.223923851  | 7.451375503  | 0.634571841 | 0.425683275 | 0.999071534 | Eprs          | Eprs          | EPRS      | 115.9374154 | 143.2447473 | 213.7416996 | 171.1656569 | 191.6295055 | 189.8364794 | 114.6755    | 178.9926342 | 193.9860094 | 219.0178901 |
| ENSMUSG000000086329 | 0.430561453  | 3.381281211  | 0.634530153 | 0.425698477 | 0.999071534 | Gm14233       | Gm14233       |           | 5.123142449 | 2.075151554 | 18.17645949 | 13.8070392  | 5.690022859 | 4.729540499 | 4.918362304 | 15.61263424 | 14.77090716 | 14.11753633 |
| ENSMUSG00000020986  | -0.193382963 | 5.598315719  | 0.634281307 | 0.425789238 | 0.999071534 | Sec23a        | Sec23a        | SEC23A    | 45.89774194 | 73.99397542 | 43.89278366 | 46.48601139 | 57.94666957 | 63.52136701 | 55.91401357 | 48.01230441 | 23.25632191 | 33.00627707 |
| ENSMUSG00000029390  | 0.231651255  | 8.789519609  | 0.634113506 | 0.425850455 | 0.999071534 | Tmed2         | Tmed2         | TMED2     | 422.3434419 | 465.6047187 | 402.1036761 | 380.0057976 | 445.6530547 | 446.3958609 | 813.8595308 | 378.9863338 | 345.3092392 | 326.4680277 |
| ENSMUSG00000047881  | -0.259281634 | 5.108195137  | 0.634095955 | 0.425856859 | 0.999071534 | Rel1          | Rel1          | RELL1     | 44.91522147 | 59.05288423 | 23.69671756 | 27.12840366 | 40.81119844 | 47.58645364 | 47.69517129 | 31.36343339 | 15.94943698 | 13.46394669 |
| ENSMUSG000000060467 | 0.356256501  | 1.516323121  | 0.633959117 | 0.425906792 | 0.999071534 | Gm10080       | Gm10080       |           | 2.526481208 | 2.312311732 | 2.692808814 | 1.80393477  | 3.139322957 | 2.546675653 | 3.494625848 | 2.832380548 | 2.749902928 | 3.006512367 |
| ENSMUSG000000032997 | -0.206278851 | 5.337917107  | 0.633883904 | 0.425934241 | 0.999071534 | Chpf          | Chpf          | CHPF      | 52.00340485 | 41.9180614  | 48.80715975 | 39.89471127 | 41.92304198 | 68.68748048 | 46.59501131 | 26.38949681 | 17.59937874 | 30.32655953 |
| ENSMUSG000000059173 | 0.687185258  | -0.441817915 | 0.633866332 | 0.425940655 | 0.999071534 | Pde1a         | Pde1a         | PDE1A     | 0.771980369 | 0.237160178 | 0.336601102 | 0.693821065 | 0.327012808 | 0.727621615 | 1.229590576 | 0.621742072 | 0           | 1.111102397 |
| ENSMUSG000000028954 | -0.193933636 | 5.7254095    | 0.633428255 | 0.426100589 | 0.999071534 | Nub1          | Nub1          | NUB1      | 58.67050804 | 83.53967257 | 43.89278366 | 45.93095454 | 61.54381046 | 70.36101019 | 38.95860667 | 61.55246508 | 26.9490487  | 45.81663412 |
| ENSMUSG000000025785 | 0.207241987  | 4.679682691  | 0.633118089 | 0.42621388  | 0.999071534 | Exosc7        | Exosc7        | EXOSC7    | 29.75633422 | 18.43920381 | 25.31240285 | 24.76941204 | 24.59136316 | 32.96125917 | 40.44705842 | 17.82327272 | 20.27071302 | 21.96061207 |
| ENSMUSG000000005779 | -0.244816781 | 8.486638405  | 0.633003757 | 0.426255652 | 0.999071534 | Psmb4         | Psmb4         | PSMB4     | 616.5315947 | 319.4547593 | 366.62592   | 398.2532916 | 319.2953057 | 453.3810284 | 495.266141  | 183.552076  | 217.7137433 | 272.2200872 |
| ENSMUSG00000046908  | -0.310227618 | 2.654938102  | 0.632774496 | 0.426339433 | 0.999071534 | Ltb4r1        | Ltb4r1        | LTB4R     | 12.7727661  | 5.988294485 | 6.530061373 | 5.342422204 | 4.970594681 | 7.276216152 | 6.471529348 | 4.973936572 | 3.221314859 | 5.163358196 |
| ENSMUSG00000022074  | 0.16297415   | 5.437866478  | 0.632597404 | 0.426404167 | 0.999071534 | Tnfrsf10b     | Tnfrsf10b     | TNFRSF10C | 37.82703808 | 44.05250299 | 42.6810197  | 41.3517355  | 45.71639056 | 48.89617254 | 52.80767948 | 42.90020294 | 36.29871866 | 39.80360938 |
| ENSMUSG000000032977 | -0.1631022   | 5.581394886  | 0.632569495 | 0.42641437  | 0.999071534 | Fam207a       | Fam207a       | FAM207A   | 59.02140821 | 46.54268486 | 53.78885605 | 45.23713347 | 57.94666957 | 65.70423185 | 47.50102541 | 37.64993655 | 30.32750087 | 41.30686557 |
| ENSMUSG000000024927 | -0.183269861 | 5.830002751  | 0.632409934 | 0.42647271  | 0.999071534 | Rela          | Rela          | RELA      | 67.51319227 | 70.25870262 | 65.36793395 | 43.84949134 | 67.82245638 | 84.54963169 | 32.61650791 | 53.2625708  | 41.56281855 | 49.93424888 |
| ENSMUSG000000083365 | -0.716471698 | 0.223959507  | 0.632280825 | 0.426519925 | 0.999071534 | Gm12895       | Gm12895       |           | 1.543960738 | 0.592900444 | 0.942483085 | 3.469105327 | 0           | 0.727621615 | 0.129430587 | 0.828989429 | 1.021392516 | 0.980384468 |
| ENSMUSG000000083558 | -0.716471122 | 0.223959507  | 0.632191895 | 0.426552451 | 0.999071534 | Gm12896       | Gm12896       |           | 1.543960738 | 0.592900444 | 0.942483085 | 3.469105327 | 0           | 0.727621615 | 0.129430587 | 0.828989429 | 1.021392516 | 0.980384468 |
| ENSMUSG000000078154 | -1.152682894 | 0.988091194  | 0.631799111 | 0.426696155 | 0.999071534 | Gm12184       | Gm12184       | CDK2AP1   | 0           | 0           | 4.712415424 | 7.423885401 | 0.588623054 | 1.746291877 | 0           | 0           | 0           | 4.117614764 |
| ENSMUSG000000068923 | -0.262623015 | 3.840019636  | 0.631724145 | 0.426723591 | 0.999071534 | Syt11         | Syt11         | SYT11     | 14.87816711 | 14.2889007  | 16.89737531 | 23.45115201 | 10.00659192 | 14.04309717 | 7.053966989 | 13.12566595 | 13.98522061 | 13.20251083 |
| ENSMUSG000000017670 | -0.273834667 | 4.316189864  | 0.63132629  | 0.426869239 | 0.999071534 | Elmo2         | Elmo2         | ELMO2     | 25.61571224 | 31.66088371 | 16.76273487 | 12.21125075 | 27.20746562 | 31.28772945 | 17.99085159 | 19.61941648 | 4.792687961 | 17.32012559 |
| ENSMUSG000000024095 | 0.169961595  | 6.443200421  | 0.631302926 | 0.426877795 | 0.999071534 | Hnrnp1l       | Hnrnp1l       | HNRNP1LL  | 91.65512381 | 75.12048626 | 88.12216843 | 75.69587824 | 94.63750663 | 113.1451612 | 107.2979566 | 71.84575049 | 79.04006703 | 75.16280918 |
| ENSMUSG000000029655 | 0.157187443  | 5.778183713  | 0.631270983 | 0.426889492 | 0.999071534 | N4bp2l2       | N4bp2l2       |           | 54.10880586 | 56.02909196 | 53.65421561 | 48.84500301 | 56.3770081  | 57.70039409 | 64.00342525 | 54.98963211 | 49.18397809 | 51.56822299 |
| ENSMUSG000000004446 | 0.21815415   | 3.941361686  | 0.631267769 | 0.426890669 | 0.999071534 | Bid           | Bid           | BID       | 13.96582667 | 17.4905631  | 12.5888812  | 14.22333184 | 14.84638148 | 25.39399437 | 17.60255983 | 12.08942917 | 13.19953406 | 12.41820326 |
| ENSMUSG000000043510 | 0.268775868  | 3.93224354   | 0.631195469 | 0.426917147 | 0.999071534 | Hscb          | Hscb          | HSCB      | 12.07096577 | 13.45884008 | 13.39672385 | 15.47220976 | 16.74305577 | 7.203453991 | 14.56094103 | 23.0735391  | 16.57798623 | 15.49007459 |
| ENSMUSG000000026153 | 0.245590428  | 4.524663678  | 0.630838217 | 0.427048017 | 0.999071534 | Fam135a       | Fam135a       | FAM135A   | 19.29950922 | 25.07968878 | 18.44574037 | 18.66378666 | 27.53447843 | 18.40882687 | 17.14955277 | 44.35093444 | 16.02800564 | 22.67956068 |
| ENSMUSG000000027983 | 0.44662706   | 2.439952018  | 0.630778087 | 0.42707005  | 0.999071534 | Cyp2u1        | Cyp2u1        | CYP2U1    | 5.54422265  | 0.711480533 | 4.712415424 | 7.146356975 | 5.035997243 | 4.511254014 | 2.912188207 | 3.592287524 | 11.47102364 | 5.22871716  |
| ENSMUSG000000055945 | 0.475342573  | 0.977832505  | 0.630768136 | 0.427073696 | 0.999071534 | Prr18         | Prr18         | PRR18     | 1.122880537 | 1.304380977 | 1.077123525 | 2.705902155 | 1.700466601 | 0.800383777 | 1.164875283 | 3.868617334 | 1.492804447 | 2.745076509 |
| ENSMUSG000000098046 | 0.744656351  | -0.429557384 | 0.630670306 | 0.427109548 | 0.999071534 | Gm8254        | Gm8254        |           | 0           | 0.711480533 | 1.009803305 | 0.138764213 | 0.523220493 | 0.218286485 | 0.453007054 | 1.588896405 | 0.785686551 | 0.522871716 |
| ENSMUSG000000026940 | -0.57134383  | -0.007462008 | 0.630666441 | 0.427110965 | 0.999071534 | 4921530D09Rik | Ccdc183       | CCDC183   | 0.842160403 | 0.592900444 | 1.548365068 | 0.971349492 | 1.373453794 | 0.654859454 | 0.258861174 | 0.898071881 | 0.235705965 | 1.30717929  |
| ENSMUSG000000047767 | 0.263375617  | 3.543507893  | 0.63060825  | 0.427132292 | 0.999071534 | Atg16l2       | Atg16l2       | ATG16L2   | 10.8779052  | 10.07930755 | 15.95489222 | 8.256470679 | 9.287163747 | 10.55051342 | 8.089411685 | 14.71456236 | 12.2567102  | 13.9868184  |

|                    |              |             |             |             |             |               |               |          |             |             |             |             |             |             |             |             |             |             |
|--------------------|--------------|-------------|-------------|-------------|-------------|---------------|---------------|----------|-------------|-------------|-------------|-------------|-------------|-------------|-------------|-------------|-------------|-------------|
| ENSMUSG00000027559 | -0.868099409 | 0.897240186 | 0.630145719 | 0.427301868 | 0.999071534 | Car3          | Car3          | CA3      | 5.333682549 | 0           | 5.92417939  | 0.416292639 | 0           | 4.074681045 | 0.517722348 | 0.27632981  | 1.178529826 | 0.326794823 |
| ENSMUSG00000070044 | -0.187098469 | 5.012075404 | 0.629674431 | 0.42747476  | 0.999071534 | Fam149a       | Fam149a       | FAM149A  | 33.19515587 | 38.36065873 | 37.56468295 | 35.17672802 | 33.22450129 | 50.8607509  | 27.18042326 | 28.53105284 | 15.24231909 | 28.95402128 |
| ENSMUSG00000028295 | 0.260351705  | 3.482848699 | 0.629247802 | 0.427631359 | 0.999071534 | Smim8         | Smim8         | SMIM8    | 12.84294614 | 8.774926572 | 13.53136429 | 8.187088573 | 8.960150939 | 8.440410737 | 13.00777399 | 10.0169556  | 11.3138863  | 14.24825426 |
| ENSMUSG00000001542 | 0.175112627  | 5.631869834 | 0.629208718 | 0.42764571  | 0.999071534 | Ell2          | Ell2          | ELL2     | 43.932701   | 61.66164618 | 44.56598587 | 34.06661432 | 58.14287726 | 60.53811839 | 63.80927937 | 45.11084141 | 42.97705434 | 41.82973728 |
| ENSMUSG00000025105 | 0.190102251  | 4.977185514 | 0.629084295 | 0.4276914   | 0.999071534 | Bnc1          | Bnc1          | BNC1     | 24.70337181 | 28.39993127 | 30.22677893 | 33.51155746 | 34.92496789 | 34.27097808 | 22.8444986  | 42.76203803 | 26.39906811 | 34.57489222 |
| ENSMUSG00000082543 | -0.437333691 | 1.515978017 | 0.628597609 | 0.427870187 | 0.999071534 | Gm14336       | Gm14336       |          | 4.631882214 | 4.387463286 | 0.942483085 | 2.497755836 | 3.924153696 | 1.236956746 | 2.653327033 | 3.17779281  | 2.592765618 | 1.111102397 |
| ENSMUSG00000035569 | 0.280724215  | 7.295688539 | 0.628504228 | 0.427904504 | 0.999071534 | Ankrd11       | Ankrd11       | ANKRD11  | 106.673651  | 112.7103744 | 209.298565  | 161.3827798 | 142.5121817 | 144.7239393 | 57.07888885 | 174.0186976 | 216.7709194 | 210.5212247 |
| ENSMUSG00000031537 | 0.156146087  | 5.693444614 | 0.62797814  | 0.428097917 | 0.999071534 | Ikbbk         | Ikbbk         | IKBBK    | 57.89852767 | 51.28588841 | 44.49866565 | 49.60820618 | 50.29456987 | 62.57545891 | 48.01874776 | 52.91715853 | 46.04123189 | 53.398274   |
| ENSMUSG00000061751 | 0.293344475  | 3.661186514 | 0.62704618  | 0.428440869 | 0.999071534 | Kalrn         | Kalrn         | KALRN    | 7.649623656 | 16.12689208 | 11.10783636 | 7.076974868 | 16.80845833 | 16.22596202 | 5.306654065 | 17.2706131  | 13.98522061 | 13.20251083 |
| ENSMUSG00000056648 | -0.452286249 | 0.948432535 | 0.627038574 | 0.42844367  | 0.999071534 | Hoxb8         | Hoxb8         | HOXB8    | 2.877381375 | 2.134441599 | 2.221567271 | 1.80393477  | 1.765869163 | 1.164194584 | 1.68259763  | 0.483577167 | 2.514196963 | 1.176461361 |
| ENSMUSG00000026853 | -0.217650983 | 5.01275475  | 0.626926894 | 0.428484795 | 0.999071534 | Crat          | Crat          | CRAT     | 49.68746375 | 41.85877135 | 20.12874588 | 29.00172054 | 39.83016001 | 48.89617254 | 32.94008438 | 28.46197039 | 14.37806388 | 24.44425272 |
| ENSMUSG00000039754 | 0.348644529  | 2.529325868 | 0.626832748 | 0.428519468 | 0.999071534 | Alkbh4        | Alkbh4        | ALKBH4   | 6.667103186 | 5.632554219 | 4.375814322 | 1.457024238 | 7.979112515 | 7.421740475 | 9.060141087 | 4.490359406 | 5.106962581 | 4.64048648  |
| ENSMUSG00000020877 | 0.292774295  | 3.258128751 | 0.626764914 | 0.428544454 | 0.999071534 | Scrn2         | Scrn2         | SCRN2    | 8.211063924 | 4.03172302  | 11.71371834 | 11.6561939  | 8.109917638 | 10.04117829 | 9.577863435 | 7.391822406 | 10.99961171 | 11.43781879 |
| ENSMUSG00000038215 | -0.240624433 | 3.734578859 | 0.626689207 | 0.428572342 | 0.999071534 | Cep44         | Cep44         | CEP44    | 18.59770889 | 10.79078808 | 13.59868451 | 16.09664872 | 14.97718661 | 13.53376204 | 16.8906916  | 8.497141644 | 6.914041649 | 13.39858772 |
| ENSMUSG00000052676 | 0.320394256  | 4.033381076 | 0.626488445 | 0.428646309 | 0.999071534 | Zmat1         | Zmat1         |          | 7.368903522 | 9.071376794 | 20.26338632 | 23.3123878  | 14.06155074 | 11.27813504 | 8.801279913 | 18.03052007 | 25.22053829 | 19.60768935 |
| ENSMUSG00000059939 | 0.220855311  | 4.004019556 | 0.626461434 | 0.428656262 | 0.999071534 | 9430015G10Rik | 9430015G10Rik | C1orf159 | 17.12392818 | 10.13859759 | 13.32940363 | 18.24749402 | 17.26627626 | 16.51701067 | 16.04939278 | 17.20153065 | 14.92804447 | 17.38548456 |
| ENSMUSG00000027361 | 0.17246205   | 5.23669392  | 0.626180527 | 0.428759793 | 0.999071534 | Gabpb1        | Gabpb1        | GABPB1   | 33.75659613 | 34.50680584 | 46.18167115 | 29.90368792 | 39.37234208 | 41.0378591  | 45.36542073 | 42.20937841 | 28.28471584 | 35.94743048 |
| ENSMUSG00000081067 | -0.409048833 | 1.237259142 | 0.626076973 | 0.428797968 | 0.999071534 | Gm12912       | Gm12912       |          | 2.666841275 | 3.616692709 | 1.548365068 | 2.636520049 | 2.681505025 | 1.8918162   | 3.235764674 | 2.003391119 | 0.707117896 | 1.503256184 |
| ENSMUSG00000091462 | 0.387997739  | 2.928214811 | 0.625852592 | 0.428880704 | 0.999071534 | Gm17084       | Gm17084       |          | 5.895122818 | 2.608761954 | 12.31960032 | 5.342422204 | 7.521294584 | 4.584016176 | 3.429910554 | 7.391822406 | 12.80669078 | 10.52279329 |
| ENSMUSG00000008136 | 0.161236841  | 6.318388738 | 0.625561839 | 0.428987949 | 0.999071534 | Fhl2          | Fhl2          | FHL2     | 78.39109747 | 80.33801017 | 84.15027543 | 65.42732648 | 83.06125323 | 95.75500456 | 96.10221082 | 74.33271878 | 58.84792267 | 84.83593593 |
| ENSMUSG00000003123 | 0.275067672  | 3.142774816 | 0.625536199 | 0.428997409 | 0.999071534 | Lipe          | Lipe          | LIPE     | 8.140883891 | 8.597056439 | 8.078426441 | 7.215739081 | 8.894748377 | 10.25946477 | 4.659501131 | 10.36236786 | 9.428238612 | 10.84958811 |
| ENSMUSG00000087150 | -0.476886706 | 0.904349175 | 0.625126652 | 0.429148545 | 0.999071534 | BC064078      | BC064078      |          | 2.666841275 | 1.422961066 | 2.086926831 | 1.595788451 | 2.746907587 | 2.837724299 | 1.164875283 | 0.690824524 | 0.235705965 | 2.483640651 |
| ENSMUSG00000029186 | 0.190802102  | 5.991821142 | 0.625123248 | 0.429149802 | 0.999071534 | Pl4k2b        | Pl4k2b        | PI4K2B   | 48.14350301 | 62.66957694 | 73.37904017 | 55.99135999 | 67.69165125 | 58.50077786 | 44.91241367 | 76.6124397  | 67.64761204 | 72.80988646 |
| ENSMUSG00000006205 | -0.237945841 | 9.601236877 | 0.62433373  | 0.42944007  | 0.999071534 | Htra1         | Htra1         | HTRA1    | 903.3573918 | 1180.109044 | 556.1323402 | 832.9321891 | 898.238781  | 985.9272886 | 1086.310916 | 525.7865452 | 404.0000245 | 533.7213041 |
| ENSMUSG00000079658 | 0.227866409  | 7.525661174 | 0.624314428 | 0.429448521 | 0.999071534 | Tceb1         | Tceb1         | TCEB1    | 196.3637339 | 103.1646773 | 196.2384423 | 215.4314408 | 165.2068706 | 146.834042  | 226.5682425 | 169.6665031 | 199.2501093 | 195.6847397 |
| ENSMUSG00000024044 | -0.231993896 | 6.362627016 | 0.623912754 | 0.429596987 | 0.999071534 | Epb4.1l3      | Epb41l3       | EPB41L3  | 51.23142449 | 107.7300107 | 97.41235883 | 84.22987735 | 120.4061159 | 76.4002696  | 51.90166537 | 124.003002  | 40.14858276 | 74.83601436 |
| ENSMUSG00000035011 | 0.228726585  | 6.293929943 | 0.62387586  | 0.429610628 | 0.999071534 | Zbtb7a        | Zbtb7a        | ZBTB7A   | 59.79338858 | 60.4758453  | 95.99863421 | 67.57817178 | 90.71335293 | 77.70998851 | 36.04641847 | 100.169556  | 89.17542354 | 96.33911368 |
| ENSMUSG00000069237 | 0.231932113  | 5.846596678 | 0.623686198 | 0.429680761 | 0.999071534 | C78339        | Fam8a1        | FAM8A1   | 34.59875654 | 57.57063312 | 52.17317076 | 55.50568524 | 74.16650485 | 41.54719423 | 40.38234313 | 94.15938261 | 63.32633601 | 50.71855646 |
| ENSMUSG00000032369 | 0.172823474  | 5.707899198 | 0.623616608 | 0.429706498 | 0.999071534 | Plscr1        | Plscr1        | PLSCR2   | 65.40779126 | 47.19487535 | 49.48036195 | 43.84949134 | 49.18272632 | 60.75640487 | 75.58746278 | 44.97267651 | 41.6413872  | 45.35912137 |
| ENSMUSG00000020577 | -0.260097222 | 3.287663493 | 0.623486994 | 0.429754441 | 0.999071534 | Tspan13       | Tspan13       | TSPAN13  | 15.36942735 | 13.34025999 | 9.626791509 | 7.423885401 | 9.0255535   | 11.05984855 | 11.00159989 | 6.977327692 | 6.206923753 | 7.646998847 |
| ENSMUSG00000052407 | 0.632595906  | 1.055261282 | 0.623418255 | 0.42977987  | 0.999071534 | Ccdc171       | Ccdc171       | CCDC171  | 1.403600671 | 0.237160178 | 2.962089695 | 1.457024238 | 1.962076848 | 1.673529715 | 0.841298815 | 2.694215643 | 5.342668547 | 0.065358965 |
| ENSMUSG00000019777 | 0.202824695  | 7.436622473 | 0.623217051 | 0.429854316 | 0.999071534 | Hdac2         | Hdac2         | HDAC2    | 143.3076285 | 119.0544092 | 213.4050985 | 174.7041443 | 183.1271725 | 187.2170416 | 167.7420407 | 179.268964  | 176.779474  | 174.3777173 |
| ENSMUSG00000033538 | 0.273237247  | 3.285581775 | 0.623213966 | 0.429855458 | 0.999071534 | Casp4         | Casp4         | CASP5    | 12.3516859  | 7.292675462 | 12.45424076 | 6.938210655 | 6.278645913 | 8.367648575 | 11.907614   | 10.36236786 | 7.385453579 | 12.54892118 |
| ENSMUSG00000031093 | -0.177639974 | 5.582854525 | 0.623096614 | 0.429898887 | 0.999071534 | Dock11        | Dock11        | DOCK11   | 41.54657986 | 58.45998379 | 46.38363182 | 53.9792789  | 62.91726426 | 52.89809143 | 35.46398083 | 56.85485832 | 27.65616659 | 46.2087879  |
| ENSMUSG00000030978 | 0.246470713  | 6.552232335 | 0.622741819 | 0.43003023  | 0.999071534 | Rrm1          | Rrm1          | RRM1     | 112.4985938 | 76.30628715 | 85.6986405  | 72.22677292 | 100.0659192 | 203.151955  | 149.2981821 | 51.32826213 | 54.91948991 | 58.95378598 |
| ENSMUSG00000003206 | -0.36450259  | 1.996628925 | 0.622738933 | 0.430031299 | 0.999071534 | Ebi3          | Ebi3          | EBI3     | 2.38612114  | 3.557402664 | 6.193460271 | 5.897479057 | 4.316569065 | 4.947826984 | 1.941458804 | 3.385040167 | 1.728510412 | 4.705845444 |
| ENSMUSG00000043999 | 0.663934106  | 0.319369695 | 0.622526852 | 0.430109839 | 0.999071534 | Gpr75         | Gpr75         | GPR75    | 1.333420637 | 0           | 1.95228639  | 0.693821065 | 0.523220493 | 0.727621615 | 0.388291761 | 1.4507315   | 1.178529826 | 2.745076509 |
| ENSMUSG00000050390 | -0.202407683 | 6.240895894 | 0.62251709  | 0.430113455 | 0.999071534 | C77080        | C77080        | KIAA1522 | 71.65381425 | 99.13295425 | 49.46857283 | 71.11665921 | 88.68587352 | 82.94886414 | 42.06494076 | 103.6236786 | 40.38428872 | 74.05170678 |
| ENSMUSG00000032840 | -0.234027556 | 4.403164207 | 0.622400377 | 0.430156687 | 0.999071534 | 2410131K14Rik | 2410131K14Rik | C12orf49 | 26.80877281 | 31.89804389 | 14.00260583 | 21.36968882 | 24.26435035 | 28.81381596 | 24.33295035 | 18.99767441 | 7.621159544 | 16.99333077 |

|                    |              |              |             |             |             |               |               |              |             |             |             |             |             |             |             |             |             |             |
|--------------------|--------------|--------------|-------------|-------------|-------------|---------------|---------------|--------------|-------------|-------------|-------------|-------------|-------------|-------------|-------------|-------------|-------------|-------------|
| ENSMUSG00000055067 | -0.351113377 | 3.383096677  | 0.622273714 | 0.430203613 | 0.999071534 | Smyd3         | Smyd3         | SMYD3        | 13.96582667 | 15.8897319  | 11.17515658 | 5.758714844 | 13.66913537 | 13.46099988 | 12.74891282 | 12.15851162 | 1.335667137 | 6.013024734 |
| ENSMUSG00000034868 | -0.185907773 | 6.643994924  | 0.622272769 | 0.430203963 | 0.999071534 | MyI12b        | MyI12b        | MYL12B       | 112.1476936 | 93.20394981 | 116.396661  | 95.3310144  | 136.1681332 | 117.1470801 | 120.5645918 | 92.70865111 | 47.45546768 | 83.72483353 |
| ENSMUSG00000033222 | 0.226696149  | 4.460554661  | 0.622245262 | 0.430214154 | 0.999071534 | Ttf2          | Ttf2          | TTF2         | 28.07201342 | 19.56571465 | 18.37842015 | 18.10872981 | 20.92881971 | 45.54911311 | 27.11570797 | 13.54016067 | 13.74951464 | 19.41161246 |
| ENSMUSG00000055531 | 0.167509828  | 6.73298308   | 0.622166792 | 0.43024323  | 0.999071534 | Cpsf6         | Cpsf6         | CPSF6        | 99.5854676  | 94.68620092 | 120.5705146 | 94.63719333 | 110.3341214 | 147.3433771 | 102.767886  | 97.06084561 | 85.95410868 | 116.2082389 |
| ENSMUSG00000035473 | -0.296150468 | 2.789997078  | 0.621616639 | 0.430447167 | 0.999071534 | Galm          | Galm          | GALM         | 7.158363421 | 9.01208675  | 4.981696305 | 7.701413827 | 10.00659192 | 5.893735083 | 7.24811287  | 7.391822406 | 2.828471584 | 6.339819557 |
| ENSMUSG00000022108 | -0.209138382 | 10.09799779  | 0.621417769 | 0.430520922 | 0.999071534 | Itm2b         | Itm2b         | ITM2B        | 1085.474579 | 1246.810344 | 1055.783016 | 1445.992483 | 1245.395578 | 835.6734251 | 1101.454295 | 1042.937784 | 869.2050313 | 998.031388  |
| ENSMUSG00000024891 | 0.348526318  | 2.366126194  | 0.621416104 | 0.430521539 | 0.999071534 | Slc29a2       | Slc29a2       | SLC29A2      | 2.596661241 | 3.853852886 | 5.654898509 | 4.787365352 | 6.017035667 | 5.093351307 | 3.365195261 | 4.006782239 | 8.485414751 | 5.22871716  |
| ENSMUSG00000021592 | 0.260522976  | 3.441747353  | 0.621035305 | 0.43066282  | 0.999071534 | Arsk          | Arsk          | ARSK         | 8.842684226 | 12.03587901 | 10.36731393 | 7.285121188 | 12.36108414 | 8.14936209  | 11.77818341 | 10.08603805 | 13.27810271 | 11.56853672 |
| ENSMUSG00000039774 | -0.582726078 | 1.037644     | 0.620824706 | 0.430740985 | 0.999071534 | Galnt12       | Galnt12       | GALNT12      | 3.509001677 | 4.743203553 | 0.336601102 | 1.665170557 | 1.700466601 | 3.201535107 | 3.17104938  | 0.898071881 | 0.392843275 | 0.196076894 |
| ENSMUSG00000033883 | 0.251513982  | 3.132018155  | 0.620550088 | 0.430842943 | 0.999071534 | D3Ert254e     | D3Ert254e     | ZNF267       | 7.228543455 | 9.901437416 | 8.818948865 | 7.562649614 | 7.39048946  | 11.71470801 | 8.283557565 | 8.013564478 | 8.01400282  | 9.542408818 |
| ENSMUSG00000096054 | 0.28454805   | 5.466105974  | 0.620500694 | 0.430861286 | 0.999071534 | Syne1         | Syne1         | SYNE1        | 15.93086761 | 33.26171491 | 40.0555311  | 58.07282318 | 57.42344908 | 32.67021052 | 22.90921389 | 63.14136149 | 56.64800033 | 49.60745406 |
| ENSMUSG00000070709 | 0.325473207  | 2.33392641   | 0.620379575 | 0.430906268 | 0.999071534 | 1700049G17Rik | 1700049G17Rik | ZNF780B      | 5.193322482 | 4.328173242 | 5.318297407 | 2.983430582 | 4.90519212  | 4.80230266  | 5.953807    | 4.006782239 | 7.306884924 | 3.529384083 |
| ENSMUSG00000097136 | 0.631311467  | 1.268212481  | 0.620373485 | 0.43090853  | 0.999071534 | Gm26772       | Gm26772       |              | 0.561440268 | 0.237160178 | 2.288887492 | 4.579219032 | 1.438856355 | 0.436572969 | 0.388291761 | 2.348803381 | 4.32127603  | 5.032640267 |
| ENSMUSG00000022550 | 0.184177711  | 4.960186065  | 0.620267946 | 0.430947733 | 0.999071534 | Adck5         | Adck5         | ADCK5        | 35.65145704 | 26.32477972 | 29.41893629 | 27.61407841 | 31.8510475  | 28.81381596 | 24.91538799 | 33.43590696 | 30.40606952 | 39.4114556  |
| ENSMUSG00000026917 | 0.185661567  | 5.259153197  | 0.620194073 | 0.430975176 | 0.999071534 | Wdr5          | Wdr5          | WDR5         | 45.47666174 | 41.85877135 | 31.90978444 | 27.89160683 | 39.1761344  | 62.06612378 | 50.21906774 | 30.81077377 | 28.36328449 | 29.60761092 |
| ENSMUSG00000041915 | 0.171973635  | 5.331851468  | 0.620155234 | 0.430989606 | 0.999071534 | Ammecr1l      | Ammecr1l      | AMMECR1L     | 32.8442557  | 47.72848575 | 36.62219987 | 38.85397967 | 39.76475745 | 48.09578877 | 32.16350086 | 40.68956446 | 41.32711258 | 41.82973728 |
| ENSMUSG00000029388 | 0.177605733  | 4.949992829  | 0.62007236  | 0.431020398 | 0.999071534 | Elf2b1        | Elf2b1        | EIF2B1       | 31.08975486 | 29.82289234 | 32.85226753 | 24.56126572 | 32.04725518 | 46.20397257 | 39.6704749  | 28.32380548 | 18.93504588 | 28.69258542 |
| ENSMUSG00000028071 | -0.529486978 | 0.531796407  | 0.619718789 | 0.431151805 | 0.999071534 | Sh2d2a        | Sh2d2a        | SH2D2A       | 2.596661241 | 2.786632087 | 1.279084186 | 0.20814632  | 1.24264867  | 2.182864846 | 0.711868228 | 0.759906976 | 0.785686551 | 0.915025503 |
| ENSMUSG00000040690 | -0.212198898 | 7.933047276  | 0.619704659 | 0.431157058 | 0.999071534 | Col16a1       | Col16a1       | COL16A1      | 206.6801988 | 331.5499283 | 264.2991851 | 289.6702948 | 265.8614129 | 272.4215327 | 145.6094103 | 226.5904439 | 179.2151023 | 274.5730099 |
| ENSMUSG00000093967 | -0.988495293 | -0.431066616 | 0.619603413 | 0.431194698 | 0.999071534 | Gm26180       | Gm26180       |              | 0           | 0           | 1.211763966 | 2.22022741  | 0.719428178 | 0.072762162 | 0           | 0.759906976 | 0.785686551 | 0.196076894 |
| ENSMUSG00000062591 | -0.728363046 | -0.307024489 | 0.619589824 | 0.431199751 | 0.999071534 | Tubb4a        | Tubb4a        | TUBB4A       | 1.122880537 | 0.237160178 | 0.740522424 | 1.318260024 | 0.915635862 | 0.654859454 | 0.129430587 | 1.519813953 | 0           | 0.196076894 |
| ENSMUSG00000086288 | 0.512348996  | 1.38140093   | 0.619514529 | 0.431227747 | 0.999071534 | Gm15265       | Gm15265       |              | 1.263240604 | 1.600831199 | 0.740522424 | 3.469105327 | 3.466335765 | 0.800383777 | 0.906014109 | 2.348803381 | 3.535589479 | 5.816947841 |
| ENSMUSG00000071533 | 0.176752921  | 6.690060941  | 0.619379289 | 0.43127804  | 0.999071534 | Pcnp          | Pcnp          | PCNP         | 91.16386357 | 93.73756021 | 113.7711724 | 101.9916966 | 101.1123602 | 107.9062855 | 110.7278671 | 100.791298  | 112.1174708 | 89.34570448 |
| ENSMUSG00000007812 | 0.218664652  | 5.711052918  | 0.619133952 | 0.431369297 | 0.999071534 | Zfp655        | Zfp655        | ZNF655       | 40.14297919 | 68.00568093 | 41.73853661 | 46.48601139 | 54.61113893 | 37.03594021 | 54.5549924  | 91.53424942 | 36.29871866 | 48.62706959 |
| ENSMUSG00000093885 | 0.599676461  | 0.223112365  | 0.618866145 | 0.431468946 | 0.999071534 | Rpl35a-ps5    | Rpl35a-ps5    |              | 0.140360067 | 0.5336104   | 2.356207712 | 0.277528426 | 0.981038424 | 1.673529715 | 1.423736457 | 0.621742072 | 1.414235792 | 0.915025503 |
| ENSMUSG00000032018 | 0.233854487  | 4.008118787  | 0.618840367 | 0.431478539 | 0.999071534 | Sc5d          | Sc5d          | SC5D         | 11.5095255  | 14.17032061 | 12.5888812  | 20.74524986 | 16.67765321 | 24.66637276 | 23.10335977 | 12.50392388 | 11.15674902 | 13.85610048 |
| ENSMUSG00000030207 | -0.247288968 | 3.722625737  | 0.618710145 | 0.431527008 | 0.999071534 | 8430419L09Rik | Fam234b       | FAM234B      | 15.36942735 | 18.67636399 | 11.30979702 | 10.82360862 | 17.85489932 | 20.00959442 | 14.62565633 | 10.22420295 | 7.542590889 | 7.189486096 |
| ENSMUSG00000090673 | -0.659472914 | 1.022742933  | 0.618690536 | 0.431534307 | 0.999071534 | Gm340         | Gm340         | LCOR         | 4.421342113 | 4.861783641 | 0           | 0.485674746 | 2.419894779 | 2.110102684 | 1.812028217 | 2.348803381 | 0.15713731  | 0.915025503 |
| ENSMUSG00000047098 | -0.194745565 | 4.839243324  | 0.618552657 | 0.431585637 | 0.999071534 | Rnf31         | Rnf31         | RP11-468E2.4 | 35.30055687 | 27.39200052 | 32.65030687 | 33.65032168 | 28.58091942 | 28.01343219 | 15.8552469  | 27.97839322 | 22.70634132 | 33.20235397 |
| ENSMUSG00000024769 | -0.253044544 | 3.49409814   | 0.618548692 | 0.431587113 | 0.999071534 | Cdc42bpg      | Cdc42bpg      | CDCA2BPG     | 16.42212785 | 13.2216799  | 8.751628644 | 13.25198235 | 11.18383803 | 13.89757285 | 7.636404631 | 10.43145031 | 10.05678785 | 7.124127131 |
| ENSMUSG00000041506 | 0.217522765  | 5.274645061  | 0.618538723 | 0.431590824 | 0.999071534 | Rrp9          | Rrp9          | RRP9         | 46.17846207 | 26.73981003 | 45.50846895 | 29.14048475 | 38.19509597 | 67.66881022 | 48.6011854  | 19.34308667 | 36.77013059 | 32.2219695  |
| ENSMUSG00000053929 | -0.16407399  | 6.117549972  | 0.618485448 | 0.43161066  | 0.999071534 | Cyhr1         | Cyhr1         | CYHR1        | 85.12838069 | 66.76059    | 91.55549966 | 65.84361911 | 71.28879214 | 82.80333981 | 53.97255476 | 62.38145451 | 54.91948991 | 63.33283661 |
| ENSMUSG00000019891 | 0.195562421  | 4.28813641   | 0.618391224 | 0.431645746 | 0.999071534 | Dcbld1        | Dcbld1        | DCBLD1       | 19.93112953 | 17.84630337 | 17.50325729 | 18.24749402 | 20.47100178 | 27.35857273 | 25.88611739 | 14.43823255 | 14.84947581 | 19.1501766  |
| ENSMUSG00000016128 | -0.197848424 | 4.506544175  | 0.618220717 | 0.431709248 | 0.999071534 | Stard13       | Stard13       | STARD13      | 18.45734882 | 28.93354167 | 25.1776241  | 25.87952574 | 26.68424513 | 26.63095112 | 14.49622574 | 23.41895136 | 14.77090716 | 23.46386826 |
| ENSMUSG00000020057 | -0.27509624  | 3.835772648  | 0.618143916 | 0.431737856 | 0.999071534 | Dram1         | Dram1         | DRAM1        | 18.52752886 | 22.11518656 | 14.06992605 | 16.23541293 | 9.352566308 | 18.04501606 | 18.18499747 | 14.92180972 | 5.656943167 | 6.862691273 |
| ENSMUSG00000031805 | -0.250467086 | 4.489929504  | 0.61810542  | 0.431752196 | 0.999071534 | Jak3          | Jak3          | JAK3         | 30.17741442 | 30.59366291 | 21.60979073 | 16.09664872 | 28.38471173 | 26.63095112 | 9.772009315 | 31.84701055 | 9.899650542 | 22.35276586 |
| ENSMUSG00000002908 | -0.351635736 | 1.703694524  | 0.618057934 | 0.431769887 | 0.999071534 | Kcnn1         | Kcnn1         | KCNN1        | 4.491522147 | 4.921073686 | 2.760129034 | 3.330341114 | 2.681505025 | 3.128772945 | 2.653327033 | 2.832380548 | 1.414235792 | 3.398666154 |
| ENSMUSG00000071652 | -0.229122599 | 4.809439202  | 0.617794102 | 0.431868195 | 0.999071534 | Ints5         | Ints5         | INTS5        | 42.66946039 | 36.87840762 | 28.1398521  | 19.49637194 | 30.28138602 | 53.48018872 | 24.52709623 | 17.2706131  | 13.90665195 | 21.63381725 |
| ENSMUSG00000044348 | -0.354234267 | 2.267478167  | 0.617791346 | 0.431869222 | 0.999071534 | Slc25a53      | Slc25a53      | SLC25A53     | 5.895122818 | 6.344034752 | 2.01960661  | 6.799446442 | 6.14784079  | 4.001918884 | 4.594785837 | 4.214029596 | 4.635550651 | 2.0261279   |

|                     |              |              |             |             |             |               |               |          |             |             |             |             |             |             |             |             |             |             |
|---------------------|--------------|--------------|-------------|-------------|-------------|---------------|---------------|----------|-------------|-------------|-------------|-------------|-------------|-------------|-------------|-------------|-------------|-------------|
| ENSMUSG00000002767  | 0.179628808  | 5.699033321  | 0.617690158 | 0.431906935 | 0.999071534 | Mrpl2         | Mrpl2         | MRPL2    | 50.38926408 | 36.64124744 | 67.99342255 | 47.87365352 | 49.11732376 | 57.77315625 | 67.62748169 | 40.62048201 | 48.31972289 | 50.78391542 |
| ENSMUSG000000024803 | 0.23596818   | 6.509284028  | 0.617344829 | 0.432035679 | 0.999071534 | Ankrd1        | Ankrd1        | ANKRD1   | 58.81086811 | 78.44072875 | 153.5574226 | 65.77423701 | 76.91341244 | 103.8316045 | 64.13285584 | 151.2905707 | 68.19759262 | 87.90780726 |
| ENSMUSG000000029346 | 0.299354033  | 2.813679825  | 0.617283278 | 0.432058632 | 0.999071534 | Srrd          | Srrd          | SRRD     | 4.631882214 | 4.446753331 | 7.270583797 | 5.273040098 | 10.59521498 | 5.966497245 | 8.218842272 | 6.908245239 | 6.678335683 | 8.496665386 |
| ENSMUSG000000039263 | 0.156265908  | 5.796939356  | 0.616975761 | 0.432173337 | 0.999071534 | Npepl1        | Npepl1        | NPEPL1   | 59.37230838 | 49.62576717 | 54.52937848 | 49.7469704  | 59.51633105 | 72.39835071 | 59.47335471 | 47.45964479 | 40.93426931 | 65.75111829 |
| ENSMUSG000000031021 | -0.176980226 | 5.21359445   | 0.616831935 | 0.432227001 | 0.999071534 | Tmem9b        | Tmem9b        | TMEM9B   | 38.24811828 | 35.98905696 | 38.84376714 | 51.27337674 | 38.3259011  | 39.43709155 | 39.54104432 | 25.07693022 | 26.47763677 | 38.16963527 |
| ENSMUSG000000041763 | 0.173473639  | 5.982003478  | 0.616433044 | 0.432375886 | 0.999071534 | Tpp2          | Tpp2          | TPP2     | 48.00314294 | 71.5630836  | 63.34832734 | 50.23264514 | 75.40915352 | 84.3313452  | 49.24833834 | 73.08923463 | 56.01945108 | 61.63350353 |
| ENSMUSG000000022564 | -0.277811274 | 7.801933233  | 0.616358063 | 0.432403881 | 0.999071534 | Grina         | Grina         | GRINA    | 182.6084473 | 348.3883009 | 241.7469112 | 218.4842535 | 279.7921585 | 128.4979772 | 93.2547379  | 354.738393  | 143.3877956 | 235.619067  |
| ENSMUSG000000070443 | 0.678765682  | -0.172959037 | 0.616139366 | 0.43248555  | 0.999071534 | Gm10291       | Gm10291       |          | 1.333420637 | 0.118580089 | 1.077123525 | 0           | 0.523220493 | 0.873145938 | 1.423736457 | 0.759906976 | 0.549980586 | 0.915025503 |
| ENSMUSG000000024487 | 0.186103024  | 6.586576113  | 0.615934051 | 0.432562243 | 0.999071534 | Yipf5         | Yipf5         | YIPF5    | 89.1286426  | 84.2511531  | 100.1051676 | 103.8650135 | 87.31241973 | 82.73057765 | 124.1239329 | 85.1786638  | 102.8463695 | 88.95355069 |
| ENSMUSG000000021025 | 0.239988398  | 7.659053652  | 0.615015436 | 0.432905635 | 0.999071534 | Nfkbia        | Nfkbia        | NFKBIA   | 194.609233  | 153.4426349 | 264.8377468 | 191.8415246 | 154.3500454 | 194.7115442 | 132.9899281 | 169.044761  | 280.0972554 | 246.4686551 |
| ENSMUSG000000026238 | 0.230806269  | 11.2402512   | 0.614954615 | 0.432928386 | 0.999071534 | Ptma          | Ptma          | PTMA     | 1911.914654 | 1410.925187 | 3116.45496  | 2576.712673 | 2493.472661 | 2521.063372 | 2283.996853 | 2146.460878 | 2872.077187 | 2552.855795 |
| ENSMUSG000000078780 | -0.310413142 | 3.23315355   | 0.614827674 | 0.432975874 | 0.999071534 | Gm5150        | Gm5150        | SIRPB2   | 18.31698875 | 9.249246928 | 5.789538949 | 9.158438064 | 11.05303291 | 13.38823772 | 12.10175988 | 5.595678644 | 3.221314859 | 7.385562989 |
| ENSMUSG000000028640 | 0.494198319  | 1.403227097  | 0.614814123 | 0.432980944 | 0.999071534 | Tfap2c        | Tfap2c        | TFAP2C   | 0.98252047  | 2.01586151  | 0.807842644 | 2.775284262 | 4.251166504 | 4.584016176 | 0.711868228 | 0.967154334 | 3.614158135 | 4.379050622 |
| ENSMUSG000000050912 | 0.233188986  | 10.98274455  | 0.614796639 | 0.432987486 | 0.999071534 | Tmem123       | Tmem123       | TMEM123  | 1449.708953 | 2245.729012 | 1955.45044  | 1686.054571 | 2337.095136 | 1520.365365 | 2383.917266 | 3105.808895 | 1716.096565 | 1657.437981 |
| ENSMUSG000000000686 | -0.628334546 | 0.756836233  | 0.614755884 | 0.433002735 | 0.999071534 | Abhd15        | Abhd15        | ABHD15   | 1.684320805 | 2.193731643 | 1.077123525 | 3.677251647 | 0.981038424 | 3.856394561 | 1.747312924 | 0           | 0.31427462  | 0.588230681 |
| ENSMUSG000000042625 | 0.229328619  | 5.676500329  | 0.614679652 | 0.43303126  | 0.999071534 | Safb2         | Safb2         | SAFB2    | 43.58180083 | 44.34895322 | 56.07774354 | 41.62926393 | 58.60069519 | 57.91868057 | 18.8321504  | 62.38145451 | 51.06962581 | 73.20204025 |
| ENSMUSG000000041135 | -0.219224647 | 3.747336181  | 0.614159169 | 0.433226093 | 0.999071534 | Ripk2         | Ripk2         | RIPK2    | 15.22906728 | 13.81458035 | 12.72352164 | 16.51294136 | 15.89282247 | 17.17187012 | 12.74891282 | 10.91502748 | 6.835472994 | 13.13715187 |
| ENSMUSG000000005299 | 0.211179845  | 5.194209583  | 0.614109468 | 0.433244705 | 0.999071534 | Letm1         | Letm1         | LETM1    | 40.63423942 | 32.90597465 | 33.66011017 | 31.01380163 | 37.73727804 | 57.4821076  | 55.71986769 | 16.85611838 | 27.57759794 | 36.14350737 |
| ENSMUSG000000055926 | -0.228536003 | 3.570789993  | 0.613989711 | 0.433289556 | 0.999071534 | Gm14137       | Gm14137       | C1Sorf62 | 16.35194782 | 12.62877946 | 10.97319592 | 11.58681179 | 14.45396611 | 12.15128097 | 9.383717555 | 8.842553906 | 8.956826681 | 13.00643394 |
| ENSMUSG000000007777 | 0.230289955  | 4.185989396  | 0.613692787 | 0.433400789 | 0.999071534 | O610009B22Rik | O610009B22Rik | TRAPPC2  | 14.24654681 | 13.81458035 | 18.64770103 | 17.41490874 | 22.17146838 | 12.95166475 | 25.36839504 | 14.71456236 | 15.3994564  | 25.57497065 |
| ENSMUSG000000075296 | -0.77528341  | 0.182194251  | 0.613647667 | 0.433417695 | 0.999071534 | Aldh3b2       | Aldh3b2       | ALDH3B2  | 1.965040939 | 2.786632087 | 0.605881983 | 0.20814632  | 0.981038424 | 2.328389169 | 1.164875283 | 0.414494714 | 0           | 0           |
| ENSMUSG000000032604 | -0.161982806 | 6.408898214  | 0.613513358 | 0.433468027 | 0.999071534 | Qars          | Qars          | QARS     | 97.26952649 | 107.5521406 | 75.26400634 | 89.15600692 | 96.33797323 | 99.32035048 | 72.02812164 | 73.5728118  | 66.78335683 | 77.05821915 |
| ENSMUSG000000001029 | -0.266680253 | 3.418037395  | 0.613392287 | 0.433513406 | 0.999071534 | Icam2         | Icam2         | ICAM2    | 12.42186594 | 13.28096995 | 14.60848781 | 9.435966491 | 10.20279961 | 13.02442691 | 15.33752455 | 6.63191543  | 5.814080477 | 6.53589645  |
| ENSMUSG000000049493 | 0.648193106  | 0.109717495  | 0.612981628 | 0.433667378 | 0.999071534 | Pls1          | Pls1          | PLS1     | 0.771980369 | 0.652190488 | 0.471214542 | 1.387642131 | 0.588623054 | 1.018670261 | 0.582437641 | 0.138164905 | 3.064177549 | 0.457512752 |
| ENSMUSG000000092072 | -1.178351976 | 0.004418579  | 0.612860118 | 0.433712953 | 0.999071534 | Gm4540        | Gm4540        |          | 1.754500839 | 0           | 4.510454763 | 0           | 0           | 0.363810808 | 1.876743511 | 0           | 0.31427462  | 0           |
| ENSMUSG000000023391 | 0.440239515  | 0.811154513  | 0.612507372 | 0.433845299 | 0.999071534 | Dlx2          | Dlx2          | DLX2     | 1.052700503 | 0.711480533 | 1.817645949 | 1.179495811 | 2.419894779 | 1.746291877 | 1.229590576 | 1.657978857 | 2.042785033 | 2.222204793 |
| ENSMUSG000000004508 | -0.351858467 | 3.657864146  | 0.612494056 | 0.433850296 | 0.999071534 | Gab2          | Gab2          | GAB4     | 12.91312617 | 32.96526469 | 10.43463415 | 4.093544286 | 13.08051232 | 17.89949173 | 6.730390522 | 16.85611838 | 5.578374512 | 7.581639883 |
| ENSMUSG000000029370 | -0.588552301 | 0.608971311  | 0.612400636 | 0.433885358 | 0.999071534 | Rassf6        | Rassf6        | RASSF6   | 1.122880537 | 0.355740266 | 0.201960661 | 4.301690606 | 2.550699902 | 0.873145938 | 1.553167044 | 0.967154334 | 1.099961171 | 0.784307574 |
| ENSMUSG000000027955 | 0.52913333   | 1.916446077  | 0.612012203 | 0.434031184 | 0.999071534 | Fam198b       | Fam198b       | FAM198B  | 6.456563086 | 2.430891821 | 2.154247051 | 0.901967385 | 3.727946011 | 8.58593506  | 10.41916225 | 0.621742072 | 1.178529826 | 1.372538255 |
| ENSMUSG000000028809 | 0.173616232  | 6.205117437  | 0.611821791 | 0.434102697 | 0.999071534 | Srrm1         | Srrm1         | SRRM1    | 69.75895334 | 91.66240865 | 69.33982695 | 60.63996112 | 68.60728711 | 102.5218856 | 54.74913828 | 87.52746718 | 66.23337625 | 68.10404101 |
| ENSMUSG000000039178 | 0.190982747  | 4.687318975  | 0.611435347 | 0.434247888 | 0.999071534 | Tbc1d19       | Tbc1d19       | TBC1D19  | 23.79103137 | 28.16277109 | 20.59998742 | 21.85536356 | 30.1505809  | 22.99284304 | 26.33912445 | 33.91948413 | 22.86347863 | 24.24817583 |
| ENSMUSG000000054003 | -0.625649941 | 0.734604023  | 0.611024545 | 0.434402311 | 0.999071534 | Tdrd9         | Tdrd9         | TDRD9    | 5.263502516 | 2.371601776 | 1.077123525 | 0.555056852 | 0.457817931 | 1.673529715 | 2.718042326 | 1.243484143 | 0.235705965 | 0.130717929 |
| ENSMUSG000000040760 | 0.163337527  | 5.586624821  | 0.610946197 | 0.434431773 | 0.999071534 | Appl1         | Appl1         | APPL1    | 43.932701   | 48.32138619 | 51.634609   | 40.3110039  | 50.81779036 | 57.26382112 | 46.91858777 | 52.08816911 | 48.71256616 | 38.03891734 |
| ENSMUSG000000024174 | 0.297052428  | 2.740341414  | 0.610849956 | 0.434467966 | 0.999071534 | Pot1b         | Pot1b         | POT1     | 5.824942784 | 9.664277238 | 4.106533441 | 4.440454819 | 6.605658721 | 8.367648575 | 8.865995207 | 6.424668073 | 6.521198373 | 4.705845444 |
| ENSMUSG000000034738 | -0.360599318 | 2.074711165  | 0.610515192 | 0.434593897 | 0.999071534 | Nostrin       | Nostrin       | NOSTRIN  | 6.035482885 | 4.565333419 | 3.90457278  | 6.105625376 | 3.073920395 | 4.319821592 | 6.989251696 | 2.763298096 | 1.728510412 | 2.548999616 |
| ENSMUSG000000028884 | 0.273348101  | 4.771732028  | 0.610319301 | 0.434667613 | 0.999071534 | Rpa2          | Rpa2          | RPA2     | 35.79181711 | 17.31269297 | 27.66861056 | 22.75733095 | 24.5259606  | 59.22839948 | 45.6242819  | 11.605852   | 17.52081009 | 17.1240487  |
| ENSMUSG000000027913 | -0.524195894 | 1.217277769  | 0.610128434 | 0.434739457 | 0.999071534 | Crc1          | Crc1          |          | 1.403600671 | 5.988294485 | 2.356207712 | 2.914048475 | 0.654025616 | 0.654859454 | 0.711868228 | 4.075864691 | 1.414235792 | 1.503256184 |
| ENSMUSG000000041809 | 0.463150344  | 1.311912166  | 0.609855542 | 0.434842206 | 0.999071534 | Efhc1         | Efhc1         | EFHC1    | 2.737021308 | 2.54947191  | 0.538561763 | 0.832585279 | 3.727946011 | 2.837724299 | 1.29430587  | 3.730452429 | 1.257098482 | 4.182973728 |
| ENSMUSG000000085307 | 0.58241172   | -0.043969185 | 0.609542619 | 0.434960074 | 0.999071534 | Gm11525       | Gm11525       |          | 1.263240604 | 0.652190488 | 0.807842644 | 0.624438959 | 0.130805123 | 0.727621615 | 0.647152935 | 1.243484143 | 0.471411931 | 1.764692042 |

|                      |              |              |             |             |             |               |               |          |             |             |             |             |             |             |             |             |             |             |
|----------------------|--------------|--------------|-------------|-------------|-------------|---------------|---------------|----------|-------------|-------------|-------------|-------------|-------------|-------------|-------------|-------------|-------------|-------------|
| ENSMUSG00000022205   | 0.215431264  | 7.583575654  | 0.609528717 | 0.434965312 | 0.999071534 | Sub1          | Sub1          | SUB1     | 172.5727025 | 136.9007125 | 214.8188231 | 225.977521  | 165.5338834 | 167.8623066 | 227.6036872 | 157.0244143 | 208.9140539 | 214.1159677 |
| ENSMUSG000000021772  | 0.264251186  | 3.412294952  | 0.608583333 | 0.435321709 | 0.999071534 | Nkiras1       | Nkiras1       | NKIRAS1  | 10.80772517 | 6.640484974 | 13.26208341 | 10.68484441 | 8.044515076 | 9.09527019  | 8.9307105   | 11.4676871  | 10.44963113 | 14.57504908 |
| ENSMUSG000000007379  | 0.219922574  | 3.654936695  | 0.608528246 | 0.43534249  | 0.999071534 | Dennd2c       | Dennd2c       | DENND2C  | 13.89564664 | 12.1544591  | 12.79084186 | 10.12978756 | 10.92222779 | 13.2427134  | 16.24353866 | 13.54016067 | 9.663944577 | 12.1567674  |
| ENSMUSG000000087269  | 0.430724384  | 0.574433673  | 0.608505197 | 0.435351186 | 0.999071534 | D330023K18Rik | D330023K18Rik |          | 0.842160403 | 1.363671021 | 1.481044848 | 1.248877918 | 1.046440986 | 1.528005392 | 1.294305087 | 1.588896405 | 1.492804447 | 1.568615148 |
| ENSMUSG000000027601  | 0.182633023  | 6.376875587  | 0.608159312 | 0.435481705 | 0.999071534 | Mtfr1         | Mtfr1         | MTFR1    | 85.83018102 | 83.24322235 | 75.86988833 | 75.83464246 | 83.12665579 | 103.4677937 | 132.2780599 | 66.59548411 | 66.39051356 | 61.17599078 |
| ENSMUSG000000021500  | 0.17281398   | 6.204747544  | 0.607858667 | 0.435595201 | 0.999071534 | Ddx46         | Ddx46         | DDX46    | 71.02219394 | 58.04495347 | 81.12086551 | 71.87986238 | 76.978815   | 102.4491234 | 53.00182536 | 69.70419447 | 71.57604479 | 81.43726977 |
| ENSMUSG000000085133  | -0.371088101 | 1.989984243  | 0.607632752 | 0.435680516 | 0.999071534 | B930095G15Rik | B930095G15Rik |          | 4.070441945 | 3.616692709 | 3.635291898 | 5.758714844 | 5.297607489 | 2.619437815 | 1.617882337 | 5.112101477 | 1.571373102 | 5.22871716  |
| ENSMUSG000000028224  | 0.203752838  | 4.224534654  | 0.607320118 | 0.435798621 | 0.999071534 | Nbn           | Nbn           | NBN      | 12.3516859  | 18.20204363 | 15.95489222 | 21.78598146 | 20.92881971 | 23.0656052  | 21.29133155 | 19.13583931 | 13.59237733 | 19.80376624 |
| ENSMUSG000000024999  | 0.237125802  | 3.997535919  | 0.607096245 | 0.435883225 | 0.999071534 | Noc3l         | Noc3l         | NOC3L    | 16.56248792 | 20.87009563 | 9.963392611 | 9.991023343 | 18.63973005 | 24.59361059 | 19.60873392 | 10.77686257 | 11.23531768 | 18.56194592 |
| ENSMUSG000000063281  | 0.244298074  | 3.911255749  | 0.606739573 | 0.436018066 | 0.999071534 | Zfp35         | Zfp35         |          | 19.29950922 | 12.92522968 | 13.46404407 | 11.03175494 | 14.45396611 | 19.13644848 | 21.8737692  | 8.220811835 | 16.73512354 | 11.89533154 |
| ENSMUSG000000062704  | -0.742508877 | -0.437444476 | 0.606735769 | 0.436019505 | 0.999071534 | 9430002A10Rik | 9430002A10Rik |          | 1.754500839 | 0.118580089 | 1.144443746 | 0.277528426 | 0.654025616 | 0.291048646 | 0.647152935 | 0.207247357 | 0           | 1.045743432 |
| ENSMUSG000000018239  | 0.222381452  | 4.255286303  | 0.606686776 | 0.436038032 | 0.999071534 | Zcchc10       | Zcchc10       | ZCCHC10  | 18.73806896 | 10.13859759 | 21.47515029 | 22.82671305 | 17.2008737  | 19.06368632 | 19.22044216 | 18.79042705 | 20.58498764 | 19.47697142 |
| ENSMUSG000000033467  | -0.27361579  | 3.80183775   | 0.606157562 | 0.436238235 | 0.999071534 | Crlf2         | Crlf2         | CRLF2    | 17.47482835 | 18.32062372 | 14.47384737 | 14.8477708  | 13.40752513 | 17.46291877 | 8.995425794 | 19.13583931 | 3.457020824 | 13.39858772 |
| ENSMUSG000000035868  | 0.410095864  | 1.297359217  | 0.606151302 | 0.436240604 | 0.999071534 | 3110052M02Rik | 3110052M02Rik |          | 2.737021308 | 2.905212176 | 0.807842644 | 1.318260024 | 2.681505025 | 2.910486461 | 3.559341141 | 2.486968286 | 2.514196963 | 1.30717929  |
| ENSMUSG000000021669  | 0.166200317  | 5.655211294  | 0.606119463 | 0.436252653 | 0.999071534 | Col4a3bp      | Col4a3bp      | COL4A3BP | 40.91495955 | 54.96187117 | 47.3261149  | 46.48601139 | 56.3770081  | 78.21932364 | 57.27303473 | 48.01230441 | 39.52003351 | 38.62714802 |
| ENSMUSG000000027715  | 0.25010046   | 6.786347212  | 0.605983837 | 0.436303986 | 0.999071534 | Ccna2         | Ccna2         | CCNA2    | 112.3582337 | 62.61028689 | 121.1090764 | 98.93888394 | 128.2544233 | 225.2716521 | 162.953109  | 47.45964479 | 83.20420575 | 83.85555146 |
| ENSMUSG000000000827  | 0.177447746  | 6.58982462   | 0.60597889  | 0.436305859 | 0.999071534 | Tpd52l2       | Tpd52l2       | TPD52L2  | 101.1294283 | 90.71376794 | 88.59340997 | 81.66273941 | 107.7834215 | 85.64106411 | 133.1193587 | 107.9758731 | 72.99028059 | 91.17575548 |
| ENSMUSG000000005312  | -0.200486145 | 7.140314665  | 0.605922143 | 0.43632734  | 0.999071534 | Ubqln1        | Ubqln1        | UBQLN1   | 192.7845521 | 160.3795701 | 134.5058002 | 136.6133678 | 160.367081  | 238.0050303 | 128.4598576 | 107.9067906 | 71.89031941 | 114.5742648 |
| ENSMUSG000000049792  | -0.187911969 | 4.941446892  | 0.605882508 | 0.436342344 | 0.999071534 | Bag5          | Bag5          | BAG5     | 25.61571224 | 33.85461536 | 40.12285132 | 40.65791444 | 27.86149124 | 26.92199976 | 25.69197151 | 25.42234248 | 27.89187256 | 30.39191849 |
| ENSMUSG0000000047649 | 0.19324843   | 5.36223117   | 0.605873326 | 0.43634582  | 0.999071534 | Cd3eap        | Cd3eap        | CD3EAP   | 36.70415754 | 27.68845074 | 49.27840129 | 41.69864604 | 42.77327528 | 49.98760497 | 32.87536909 | 31.01802112 | 49.65539002 | 45.03232654 |
| ENSMUSG000000027522  | 0.201252243  | 5.044412419  | 0.605666345 | 0.436424189 | 0.999071534 | Stx16         | Stx16         | STX16    | 39.65171895 | 31.72017376 | 23.62939734 | 24.76941204 | 39.83016001 | 29.25038893 | 24.26823505 | 46.00891329 | 28.12757853 | 40.13040421 |
| ENSMUSG000000034867  | 0.182133358  | 4.978381125  | 0.605646006 | 0.436431892 | 0.999071534 | Ankrd27       | Ankrd27       | ANKRD27  | 30.17741442 | 26.44335981 | 37.43004251 | 27.82222473 | 30.80460651 | 43.51177259 | 22.06791508 | 34.40306129 | 32.21314859 | 28.95402128 |
| ENSMUSG000000020364  | 0.469675035  | 0.723359897  | 0.605441765 | 0.436509246 | 0.999071534 | Zfp354a       | Zfp354a       | ZNF354A  | 1.754500839 | 0.889350666 | 1.009803305 | 0.917349492 | 2.027479409 | 0.727621615 | 1.747312924 | 1.72706131  | 0.942823861 | 3.267948225 |
| ENSMUSG000000020018  | 0.248945727  | 5.458215232  | 0.605309121 | 0.436559496 | 0.999071534 | Snrpf         | Snrpf         | SNRPF    | 26.94913288 | 20.39577528 | 69.74374827 | 47.45736088 | 42.11924967 | 35.65345915 | 38.05259257 | 39.44608032 | 53.34811681 | 56.92765808 |
| ENSMUSG000000031906  | 0.705774599  | -0.399296165 | 0.604793141 | 0.436755048 | 0.999071534 | Smpd3         | Smpd3         | SMPD3    | 0.701800335 | 0.237160178 | 0.336601102 | 1.040731598 | 0.130805123 | 0.873145938 | 0.258861174 | 0.069082452 | 0.864255206 | 1.699333077 |
| ENSMUSG000000075555  | -0.543920365 | -0.019296455 | 0.604455442 | 0.436883105 | 0.999071534 | Gm10863       | Gm10863       |          | 0.912340436 | 1.837991377 | 0.875162864 | 1.248877918 | 0.327012808 | 0.9459081   | 0.582437641 | 0.828989429 | 0.549980586 | 0.457512752 |
| ENSMUSG000000029545  | -0.252645429 | 5.089281479  | 0.604393892 | 0.436906451 | 0.999071534 | Acads         | Acads         | ACADS    | 57.61780754 | 42.15522157 | 24.03331866 | 27.75284262 | 41.20361381 | 43.43901043 | 51.96638066 | 26.94215643 | 9.978219197 | 23.00635551 |
| ENSMUSG000000052482  | -0.656095428 | -0.231941491 | 0.604314364 | 0.436936619 | 0.999071534 | Gm8174        | Gm8174        |          | 0.771980369 | 0.830060622 | 1.413724627 | 0.971349492 | 0.523220493 | 0.218286485 | 0.388291761 | 0.690824524 | 0           | 1.372538255 |
| ENSMUSG000000028124  | 0.162853357  | 5.943608306  | 0.604148233 | 0.43699965  | 0.999071534 | Gclm          | Gclm          | GCLM     | 54.45970603 | 50.8708581  | 73.85028171 | 53.21607572 | 68.67268968 | 77.41893986 | 62.32082762 | 56.78577587 | 58.21937343 | 58.75770909 |
| ENSMUSG000000045954  | 0.211624447  | 8.421808025  | 0.604073573 | 0.437027981 | 0.999071534 | Sdpr          | Sdpr          | SDPR     | 297.3528021 | 245.9351042 | 289.342307  | 375.4265785 | 438.6549806 | 342.2732078 | 389.7154973 | 327.5199068 | 365.4228149 | 325.6183612 |
| ENSMUSG000000044966  | 0.759498661  | -0.289553835 | 0.603976479 | 0.437064829 | 0.999071534 | Fbxo48        | Fbxo48        | FBXO48   | 1.263240604 | 0.652190488 | 0           | 0           | 0.784830739 | 1.673529715 | 0.711868228 | 0.27632981  | 1.021392516 | 0.588230681 |
| ENSMUSG000000070319  | -0.16997577  | 6.284971333  | 0.603294038 | 0.437323954 | 0.999071534 | Eif3g         | Eif3g         | EIF3G    | 85.33892079 | 78.02569844 | 103.4038584 | 78.12425197 | 83.06125323 | 111.0350585 | 80.44110979 | 52.70991118 | 52.56243026 | 65.42432347 |
| ENSMUSG000000071793  | -0.243109378 | 3.965710008  | 0.603124771 | 0.437388262 | 0.999071534 | 2610005L07Rik | 2610005L07Rik |          | 20.84366996 | 28.044191   | 11.30979702 | 10.6154623  | 17.00466601 | 19.2819728  | 15.01394809 | 12.02034672 | 8.01400282  | 15.81686941 |
| ENSMUSG000000053977  | -0.513956005 | 0.629211903  | 0.602824305 | 0.43750245  | 0.999071534 | Cd8a          | Cd8a          | CD8A     | 1.122880537 | 0.889350666 | 2.086926831 | 2.983430582 | 1.438856355 | 2.692199976 | 0.388291761 | 0.414494714 | 1.335667137 | 0.980384468 |
| ENSMUSG000000079477  | -0.199430438 | 7.808151408  | 0.602334525 | 0.437688683 | 0.999071534 | Rab7          | Rab7          | RAB7A    | 259.385404  | 295.5015813 | 227.609665  | 197.94715   | 267.1040616 | 280.2798462 | 247.406567  | 210.5633149 | 115.8887663 | 176.795999  |
| ENSMUSG000000022512  | 0.17890184   | 6.305832748  | 0.602303939 | 0.437700317 | 0.999071534 | Cldn1         | Cldn1         | CLDN1    | 54.10880586 | 64.86330858 | 75.39864678 | 99.5633229  | 88.48966584 | 99.97520993 | 85.61833327 | 72.67473992 | 73.69739848 | 73.72491196 |
| ENSMUSG000000024955  | 0.201043626  | 4.622176941  | 0.602043267 | 0.437799487 | 0.999071534 | Esrra         | Esrra         | ESRRA    | 31.37047499 | 25.25755892 | 19.65750434 | 17.76181928 | 24.85297341 | 23.79322682 | 35.14040436 | 22.17546722 | 23.88487115 | 20.261279   |
| ENSMUSG000000001436  | 0.218441781  | 4.418476334  | 0.601790068 | 0.437895848 | 0.999071534 | Slc19a1       | Slc19a1       | SLC19A1  | 27.93165335 | 16.36405226 | 16.76273487 | 20.74524986 | 20.27479409 | 33.39783214 | 30.41618794 | 14.30006765 | 19.17075184 | 14.90184391 |
| ENSMUSG000000024824  | 0.183089923  | 4.46971386   | 0.601532943 | 0.437993736 | 0.999071534 | Rad9a         | Rad9a         | RAD9A    | 20.91365    | 19.38784452 | 24.30259954 | 18.87193298 | 23.74112986 | 26.48542679 | 20.45003274 | 27.56389851 | 18.46363395 | 20.32663796 |

|                    |              |              |             |             |             |               |               |             |             |             |             |             |              |             |             |             |             |             |
|--------------------|--------------|--------------|-------------|-------------|-------------|---------------|---------------|-------------|-------------|-------------|-------------|-------------|--------------|-------------|-------------|-------------|-------------|-------------|
| ENSMUSG00000054434 | -0.333239233 | 2.082652356  | 0.601411296 | 0.438040059 | 0.999071534 | Tmem120b      | Tmem120b      | TMEM120B    | 3.298461576 | 5.869714396 | 3.029409915 | 5.82809695  | 5.624620297  | 6.330308052 | 3.106334087 | 3.108710358 | 1.964216377 | 3.660102012 |
| ENSMUSG00000020634 | 0.372451859  | 2.799566879  | 0.601253954 | 0.438099985 | 0.999071534 | Ubxn2a        | Ubxn2a        | UBXN2A      | 8.211063924 | 10.13859759 | 5.85685917  | 0.901967385 | 6.213243352  | 12.6606161  | 9.383717555 | 6.079255811 | 5.499805857 | 4.64048648  |
| ENSMUSG00000063952 | -0.216772617 | 4.542948934  | 0.601170673 | 0.438131709 | 0.999071534 | Brpf3         | Brpf3         | BRPF3       | 24.98409194 | 25.90974941 | 26.32220615 | 23.93682676 | 28.31930917  | 31.06944297 | 10.67802342 | 25.49142493 | 12.33527885 | 26.40502166 |
| ENSMUSG00000028158 | -0.26964137  | 3.132054344  | 0.601089385 | 0.438162678 | 0.999071534 | Mttp          | Mttp          | MTTP        | 9.474304528 | 8.537766395 | 8.415027543 | 13.59889288 | 8.633138131  | 7.348978314 | 7.053966989 | 6.35558562  | 5.814080477 | 11.17638293 |
| ENSMUSG00000044350 | 0.210349902  | 4.054567662  | 0.600714956 | 0.438305368 | 0.999071534 | Lacc1         | Lacc1         | RP11-6587.2 | 21.05401006 | 17.96488346 | 14.60848781 | 10.75422652 | 15.43500454  | 27.06752409 | 17.53784453 | 15.19813953 | 11.70672961 | 16.07830527 |
| ENSMUSG00000042079 | 0.205872594  | 8.968023057  | 0.600311122 | 0.438459344 | 0.999071534 | Hnmpf         | Hnmpf         | HNRNPF      | 447.1871737 | 381.4128557 | 559.0271097 | 490.6008754 | 532.6384616  | 655.441551  | 483.7468188 | 387.6216404 | 571.5869658 | 475.2903899 |
| ENSMUSG00000028671 | 0.258172808  | 3.655274762  | 0.600288888 | 0.438467823 | 0.999071534 | Gale          | Gale          | GALE        | 16.00104765 | 8.004155995 | 9.357510628 | 9.089055958 | 16.87386089  | 15.78938905 | 19.99702569 | 10.50053276 | 11.07818037 | 8.56202435  |
| ENSMUSG00000028089 | 0.310948182  | 2.775903236  | 0.600213513 | 0.438496573 | 0.999071534 | Chd1l         | Chd1l         | CHD1L       | 9.193584394 | 6.166164618 | 5.250977187 | 4.717983245 | 5.951633105  | 14.69795663 | 8.671849326 | 4.835771668 | 5.499805857 | 3.660102012 |
| ENSMUSG00000021114 | -0.171798376 | 6.011512872  | 0.599668502 | 0.438704535 | 0.999071534 | Atp6v1d       | Atp6v1d       | ATP6V1D     | 77.97001726 | 67.64994067 | 76.74505119 | 55.02001049 | 78.02525598  | 75.4543615  | 69.18064873 | 62.31237206 | 30.01322625 | 62.02565732 |
| ENSMUSG00000010045 | -0.176467947 | 4.913993189  | 0.599514232 | 0.438763429 | 0.999071534 | Tmem115       | Tmem115       | TMEM115     | 37.68667801 | 34.80325607 | 29.14965541 | 28.65481    | 35.51359095  | 40.74681045 | 30.7397644  | 29.08371246 | 18.14935933 | 20.39199693 |
| ENSMUSG00000020407 | 0.18059477   | 5.587947819  | 0.599406437 | 0.438804587 | 0.999071534 | Upp1          | Upp1          | UPP1        | 59.23194831 | 56.62199241 | 45.50846895 | 33.30341114 | 39.76475745  | 42.20205368 | 50.67207479 | 54.36789003 | 49.96966464 | 44.24801897 |
| ENSMUSG00000007617 | 0.200683327  | 4.366834208  | 0.599050515 | 0.438940527 | 0.999071534 | Homer1        | Homer1        | HOMER1      | 15.65014748 | 16.89766266 | 29.21697563 | 15.61097397 | 21.77905301  | 27.72238354 | 22.13263037 | 23.0735391  | 14.92804447 | 19.41161246 |
| ENSMUSG00000067780 | 0.478577687  | 0.695874781  | 0.598936982 | 0.438983903 | 0.999071534 | Pi15          | Pi15          | PI15        | 1.684320805 | 0.711480533 | 0.471241542 | 2.289609516 | 1.24264867   | 1.382481069 | 3.041618794 | 1.243484143 | 1.021392516 | 1.699333077 |
| ENSMUSG00000000976 | 0.220533338  | 4.517282901  | 0.598539891 | 0.439135667 | 0.999071534 | Heatr6        | Heatr6        | HEATR6      | 20.00130956 | 23.00453723 | 23.42743668 | 18.87193298 | 24.00274011  | 29.03210245 | 11.06631518 | 22.24454967 | 27.42046063 | 27.18932923 |
| ENSMUSG00000063730 | 0.334607166  | 3.35698172   | 0.597898319 | 0.439381038 | 0.999071534 | Hsd3b2        | Hsd3b2        | HSD3B1      | 5.474042616 | 7.470545595 | 13.73332495 | 10.19916966 | 9.352566308  | 5.384399953 | 4.400639957 | 12.9184186  | 11.5495923  | 18.30051006 |
| ENSMUSG00000083669 | -0.59240124  | 4.540994974  | 0.597882532 | 0.439387078 | 0.999071534 | Gm10169       | Gm10169       |             | 10.8779052  | 38.83497909 | 2.221567271 | 5.411804311 | 90.255535    | 16.22596202 | 55.13743004 | 14.3691501  | 1.807079067 | 4.575127515 |
| ENSMUSG00000029869 | -0.315325052 | 3.324905066  | 0.597866099 | 0.439393366 | 0.999071534 | Ephb6         | Ephb6         | EPHB6       | 9.404124495 | 14.94109119 | 11.2424768  | 11.17051915 | 10.07199449  | 7.567264798 | 3.17104938  | 16.02712896 | 4.556981996 | 11.17638293 |
| ENSMUSG00000068744 | 0.414004026  | 1.23006158   | 0.597864151 | 0.439394111 | 0.999071534 | Psrc1         | Psrc1         | PSRC1       | 2.947561409 | 1.185800888 | 2.01960661  | 0.693821065 | 3.139322957  | 3.419821592 | 2.265035272 | 1.519813953 | 2.749902928 | 2.287563758 |
| ENSMUSG00000017167 | -0.498902457 | 1.130538214  | 0.597842649 | 0.439402339 | 0.999071534 | Cntnap1       | Cntnap1       | CNTNAP1     | 3.087921476 | 4.091013064 | 0.269280881 | 1.665170557 | 3.466335765  | 2.182864846 | 0.711868228 | 3.108710358 | 1.257098482 | 0.980384468 |
| ENSMUSG00000033237 | 0.283220312  | 6.481204969  | 0.597705084 | 0.439454983 | 0.999071534 | Arid2         | Arid2         | ARID2       | 50.45944412 | 51.22659837 | 120.0319529 | 110.7338421 | 81.687779943 | 69.63338858 | 35.85227259 | 96.92268071 | 130.7382421 | 119.4761871 |
| ENSMUSG00000020219 | 0.221813995  | 7.537182704  | 0.597650576 | 0.439475844 | 0.999071534 | Timm13        | Timm13        | TIMM13      | 210.3997406 | 116.3863572 | 203.7109868 | 204.2609217 | 151.6031378  | 187.6536146 | 237.7639882 | 123.6575898 | 212.1353688 | 188.7566895 |
| ENSMUSG00000022272 | -0.190782087 | 6.229570644  | 0.597509008 | 0.439530034 | 0.999071534 | Myo10         | Myo10         |             | 74.39083555 | 91.7216987  | 103.8751    | 65.6354728  | 79.59491746  | 124.7143448 | 43.16510075 | 59.0654968  | 57.35511822 | 62.67924696 |
| ENSMUSG00000012705 | 0.769232213  | -0.594670998 | 0.597370427 | 0.439558309 | 0.999071534 | Retn          | Retn          | RETN        | 0.350900168 | 0.415030311 | 1.211763966 | 0           | 0.065402562  | 0.654859454 | 0.388291761 | 1.519813953 | 0.471411931 | 0.196076894 |
| ENSMUSG00000044573 | 0.190332767  | 6.608151906  | 0.597326824 | 0.439599785 | 0.999071534 | Acp1          | Acp1          | ACP1        | 99.7960077  | 68.18355107 | 102.1247743 | 110.2481673 | 90.32093756  | 85.93211276 | 130.4013164 | 84.00426211 | 101.824977  | 90.7836017  |
| ENSMUSG00000024072 | -0.169703698 | 6.476130432  | 0.597202508 | 0.439647391 | 0.999071534 | Yipf4         | Yipf4         | YIPF4       | 100.5679881 | 107.4335605 | 81.12086551 | 98.45320919 | 101.0469577  | 78.58313444 | 107.168526  | 78.75399573 | 61.04784501 | 78.30003948 |
| ENSMUSG00000034518 | 0.201606098  | 4.08753339   | 0.59713638  | 0.439672718 | 0.999071534 | Hmgxb4        | Hmgxb4        | HMGXB4      | 16.91338808 | 13.39955004 | 17.09933597 | 12.14186865 | 22.3022735   | 22.99284304 | 16.8259763  | 15.75079915 | 14.06378926 | 18.36586903 |
| ENSMUSG00000006395 | 0.23998082   | 3.809504078  | 0.596495639 | 0.439918231 | 0.999071534 | Hyl           | Hyl           | HYI         | 11.2989854  | 10.61291795 | 14.54116759 | 16.65170557 | 12.62269439  | 13.09718907 | 9.707294022 | 16.09621141 | 16.34228026 | 15.75151045 |
| ENSMUSG00000001020 | 0.24321017   | 10.71617647  | 0.596028619 | 0.440097312 | 0.999071534 | S100a4        | S100a4        | S100A4      | 1847.349023 | 1456.874971 | 1245.827998 | 2003.269562 | 1411.845097  | 1119.736904 | 2812.979662 | 1383.030697 | 1708.868248 | 1586.000633 |
| ENSMUSG00000087413 | 1.028631182  | -0.757091992 | 0.595931832 | 0.44013444  | 0.999071534 | Gm11266       | Gm11266       |             | 0           | 0           | 0.06732022  | 1.248877918 | 0.196207685  | 0           | 0.064715293 | 0.621742072 | 0.471411931 | 1.764692042 |
| ENSMUSG00000021624 | -0.48453415  | 1.796110214  | 0.5958422   | 0.440168827 | 0.999071534 | Cd180         | Cd180         | CD180       | 5.684582717 | 6.166164618 | 2.888887492 | 2.914048475 | 3.204725518  | 7.931075606 | 4.27120937  | 0.621742072 | 0.392843275 | 1.568615148 |
| ENSMUSG00000073968 | 0.303259804  | 2.304312845  | 0.595780676 | 0.440192433 | 0.999071534 | Trim68        | Trim68        | TRIM68      | 4.631882214 | 4.387463286 | 3.702612119 | 5.064893778 | 4.51277675   | 5.966497245 | 3.300479967 | 6.286503168 | 3.355589479 | 6.731973344 |
| ENSMUSG00000040139 | 0.316040374  | 3.089124923  | 0.595739992 | 0.440208044 | 0.999071534 | 9430038101Rik | 9430038101Rik | LINC00959   | 8.561964092 | 3.794562842 | 10.83855548 | 9.991023343 | 5.297607489  | 8.731459383 | 11.71346812 | 4.421276953 | 10.60676844 | 8.627383315 |
| ENSMUSG00000056429 | -0.193104552 | 7.051887594  | 0.595688237 | 0.440227904 | 0.999071534 | Tgoln1        | Tgoln1        | TGOLN2      | 123.3063189 | 207.4558654 | 124.2731268 | 139.9437089 | 139.2420536  | 126.8244475 | 106.9096648 | 151.7741479 | 104.9677232 | 103.201805  |
| ENSMUSG00000027583 | -0.390239619 | 1.747908066  | 0.595593706 | 0.440264183 | 0.999071534 | Zbtb46        | Zbtb46        | ZBTB46      | 6.175842952 | 3.083082309 | 2.827449254 | 4.02416218  | 2.87771271   | 4.656778337 | 1.423736457 | 1.657978857 | 1.335667137 | 4.901922338 |
| ENSMUSG00000047117 | 0.399714475  | 1.099993597  | 0.595559634 | 0.44027726  | 0.999071534 | Ankdd1b       | Ankdd1b       | ANKDD1B     | 2.245761073 | 1.067220799 | 1.548365068 | 1.942698983 | 2.223687094  | 1.673529715 | 1.553167044 | 2.003391119 | 2.671334273 | 2.875794438 |
| ENSMUSG00000096006 | 0.21572508   | 6.83044569   | 0.595526242 | 0.440290077 | 0.999071534 | Gm21596       | Gm21596       |             | 116.6392157 | 63.79608778 | 169.579635  | 102.2692251 | 92.8062349   | 150.1083392 | 147.292008  | 77.99408875 | 115.9673349 | 99.34562605 |
| ENSMUSG00000015247 | 0.190553839  | 4.882380075  | 0.595418839 | 0.440331304 | 0.999071534 | Nipsnap3b     | Nipsnap3b     | NIPSNAP3A   | 31.93191526 | 25.90974941 | 23.62939734 | 29.14048475 | 31.8510475   | 32.96125917 | 47.69517129 | 26.80399153 | 19.79930108 | 25.35927823 |
| ENSMUSG00000026875 | 0.186969943  | 5.014575215  | 0.595022853 | 0.440483359 | 0.999071534 | Traf1         | Traf1         | TRAF1       | 32.91443573 | 27.15484034 | 28.67841387 | 27.47531419 | 40.48418563  | 35.28964834 | 26.92156209 | 24.17885834 | 37.55581714 | 39.15001974 |
| ENSMUSG00000097416 | 0.571984159  | 0.017483764  | 0.594957222 | 0.440508569 | 0.999071534 | Gm26670       | Gm26670       |             | 0.140360067 | 0.415030311 | 1.211763966 | 1.110113705 | 0.784830739  | 0.800383777 | 0.647152935 | 1.312566595 | 1.414235792 | 0.784307574 |

|                     |              |              |             |             |             |               |               |               |  |             |             |             |             |             |             |             |             |             |             |
|---------------------|--------------|--------------|-------------|-------------|-------------|---------------|---------------|---------------|--|-------------|-------------|-------------|-------------|-------------|-------------|-------------|-------------|-------------|-------------|
| ENSMUSG00000086684  | -0.935981895 | -0.793815992 | 0.594662287 | 0.440621883 | 0.999071534 | Gm12590       | Gm12590       |               |  | 0.491260235 | 0           | 0.269280881 | 1.873316877 | 0.327012808 | 0           | 0.064715293 | 0.069082452 | 0.235705965 | 1.045743432 |
| ENSMUSG00000052395  | 0.25036675   | 4.103120669  | 0.594507144 | 0.440681508 | 0.999071534 | Rft1          | Rft1          | RP11-894J14.5 |  | 25.54553221 | 15.3561215  | 10.09803305 | 10.33793388 | 20.27479409 | 18.48158903 | 27.89229149 | 12.98750105 | 10.37106247 | 20.84950968 |
| ENSMUSG00000022914  | 0.172602212  | 5.115480193  | 0.594490459 | 0.440687921 | 0.999071534 | Brwd1         | Brwd1         | BRWD1         |  | 29.12471392 | 38.83497909 | 37.29540207 | 32.67897218 | 30.41219114 | 41.76548071 | 25.7566868  | 39.10066805 | 30.7989129  | 28.28073767 |
| ENSMUSG00000028413  | -0.187228484 | 7.104118386  | 0.59423644  | 0.440785574 | 0.999071534 | B4galt1       | B4galt1       | B4GALT1       |  | 162.1860575 | 190.913943  | 157.5293156 | 116.4231748 | 135.0562897 | 149.089669  | 133.3782199 | 152.1886426 | 75.89732082 | 118.3650847 |
| ENSMUSG00000059895  | -0.177251994 | 5.110814983  | 0.594184259 | 0.440805638 | 0.999071534 | Ptp4a3        | Ptp4a3        | PTP4A3        |  | 51.23142449 | 40.3172302  | 34.40063259 | 29.27924896 | 35.2519807  | 45.40358879 | 24.39766564 | 32.46875263 | 21.5278115  | 35.22848187 |
| ENSMUSG00000070738  | -0.226303855 | 5.135456924  | 0.593963412 | 0.440890571 | 0.999071534 | Dgkd          | Dgkd          | DGKD          |  | 53.19646542 | 54.13181054 | 23.36011646 | 30.87503741 | 35.44818839 | 62.86650756 | 35.91698788 | 22.03730231 | 18.30649664 | 24.24817583 |
| ENSMUSG00000045763  | -0.236911818 | 6.582234303  | 0.593910691 | 0.440910851 | 0.999071534 | Basp1         | Basp1         | BASP1         |  | 95.93610585 | 108.7379414 | 165.3384612 | 105.406802  | 59.7779413  | 114.4548801 | 47.69517129 | 122.9667653 | 80.06145954 | 58.82306805 |
| ENSMUSG00000083943  | 0.351747407  | 2.064759743  | 0.593640557 | 0.441014781 | 0.999071534 | Gm11483       | Gm11483       |               |  | 3.859901845 | 3.438822576 | 2.962089695 | 3.538487434 | 4.708984435 | 2.255627007 | 7.118682283 | 4.006782239 | 2.278490998 | 6.143742663 |
| ENSMUSG00000035158  | -0.315251895 | 2.875299646  | 0.593585552 | 0.441035948 | 0.999071534 | Mitf          | Mitf          | MITF          |  | 5.403862583 | 10.49433786 | 4.981696305 | 11.72557601 | 8.567735569 | 7.057929668 | 6.924536402 | 9.187966168 | 2.435628308 | 5.94766577  |
| ENSMUSG00000070342  | -0.574638675 | -0.118082527 | 0.592822002 | 0.441329938 | 0.999071534 | Gm10287       | Gm10287       |               |  | 1.684320805 | 1.363671021 | 0.875162864 | 0.346910533 | 0.654025616 | 0.582097292 | 0.19414588  | 0.483577167 | 0.628549241 | 1.111102397 |
| ENSMUSG00000041729  | 0.548257764  | 0.013493625  | 0.592200929 | 0.441569293 | 0.999071534 | Coro2b        | Coro2b        | CORO2B        |  | 1.122880537 | 0.948640711 | 0.201960661 | 0.763203172 | 0.654025616 | 0.582097292 | 1.553167044 | 0.967154334 | 0.471411931 | 1.437897219 |
| ENSMUSG00000094050  | 1.219236977  | -0.744772309 | 0.591926004 | 0.44167531  | 0.999071534 | Gm23472       | Gm23472       |               |  | 0           | 0           | 0           | 1.248877918 | 0.196207685 | 0.072762162 | 0           | 1.588896405 | 1.335667137 | 0           |
| ENSMUSG00000031767  | -0.268743654 | 3.347988624  | 0.591850237 | 0.441704534 | 0.999071534 | Nudt7         | Nudt7         | NUDT7         |  | 12.91312617 | 9.01208675  | 10.36731393 | 15.40282765 | 8.960150939 | 6.475832375 | 14.10793398 | 8.428059192 | 6.206923753 | 8.496665386 |
| ENSMUSG00000064856  | 1.21923697   | -0.744772309 | 0.591833568 | 0.441710964 | 0.999071534 | Gm23444       | Gm23444       |               |  | 0           | 0           | 0           | 1.248877918 | 0.196207685 | 0.072762162 | 0           | 1.588896405 | 1.335667137 | 0           |
| ENSMUSG00000021357  | -0.156250692 | 5.513288216  | 0.591792852 | 0.44172667  | 0.999071534 | Exoc2         | Exoc2         | EXOC2         |  | 44.42396123 | 43.99321295 | 51.90388988 | 49.26129565 | 59.58173361 | 50.20589145 | 40.25291254 | 41.10405917 | 34.57020824 | 42.67940382 |
| ENSMUSG00000051397  | 0.680473641  | -0.000585455 | 0.591777322 | 0.441732661 | 0.999071534 | Tacstd2       | Tacstd2       | TACSTD2       |  | 1.965040939 | 0.237160178 | 0.403921322 | 0.277528426 | 0.588623054 | 1.819054038 | 0.970729402 | 0.621742072 | 0           | 2.0261279   |
| ENSMUSG00000090222  | -0.337684155 | 1.910724946  | 0.591549801 | 0.441820445 | 0.999071534 | Gm16340       | Gm16340       |               |  | 2.877381375 | 4.506043375 | 2.962089695 | 5.342422204 | 5.232204928 | 3.565345915 | 2.200319978 | 3.730452429 | 3.221314859 | 2.61435858  |
| ENSMUSG00000068270  | -0.245830075 | 3.992501371  | 0.591455536 | 0.441856823 | 0.999071534 | Shroom4       | Shroom4       | SHROOM4       |  | 14.45708691 | 25.61329918 | 15.48365068 | 12.76630761 | 20.99422227 | 21.97417278 | 11.32517636 | 18.30684988 | 5.735511822 | 14.83648494 |
| ENSMUSG00000060081  | -0.314774264 | 2.79885576   | 0.591226373 | 0.441945279 | 0.999071534 | Hist1h2aa     | Hist1h2aa     |               |  | 7.439083555 | 5.395394041 | 8.078426441 | 11.72557601 | 6.278645913 | 4.947826984 | 5.371369359 | 3.661369977 | 4.635550651 | 10.58815225 |
| ENSMUSG00000026833  | -0.243489561 | 3.950247603  | 0.590801368 | 0.442109402 | 0.999071534 | Olfm1         | Olfm1         | OLFM1         |  | 18.73806896 | 25.25755892 | 12.45424076 | 12.62754339 | 17.59328907 | 27.21304841 | 12.68419752 | 8.635306549 | 10.99961171 | 10.71887018 |
| ENSMUSG00000032526  | 0.271320794  | 3.571204561  | 0.590791743 | 0.44211312  | 0.999071534 | Deb1          | Deb1          | SS18L2        |  | 10.59718506 | 7.944865951 | 13.93528561 | 14.43147816 | 7.979112515 | 8.367648575 | 16.30825396 | 10.84594503 | 14.6923385  | 9.934562605 |
| ENSMUSG00000030353  | 0.280056115  | 3.095281367  | 0.59077634  | 0.44211907  | 0.999071534 | Tead4         | Tead4         | TEAD4         |  | 6.807463254 | 11.50226861 | 6.597381593 | 4.371072713 | 10.46440986 | 10.76879991 | 7.895265804 | 12.08942917 | 5.185531236 | 9.215613995 |
| ENSMUSG00000001056  | 0.249560889  | 7.129838411  | 0.59071736  | 0.442141854 | 0.999071534 | Nhp2          | Nhp2          | NHP2          |  | 176.7133245 | 76.18770706 | 167.8966295 | 118.4352559 | 125.1151003 | 177.6124363 | 262.8088068 | 70.18777163 | 111.8031962 | 120.7180074 |
| ENSMUSG00000025464  | -0.221883216 | 4.277811976  | 0.590579344 | 0.442195177 | 0.999071534 | Paox          | Paox          | PAOX          |  | 26.94913288 | 14.64464097 | 20.5326672  | 23.3123878  | 22.17146838 | 27.57685922 | 23.55636683 | 9.878790692 | 11.94243557 | 15.35935666 |
| ENSMUSG00000031438  | 0.337229186  | 1.918598056  | 0.590543763 | 0.442208926 | 0.999071534 | Rnf128        | Rnf128        | RNF128        |  | 5.333682549 | 3.142372354 | 2.086926831 | 2.914048475 | 3.335530641 | 3.128772945 | 4.27120937  | 4.973936572 | 3.378452169 | 3.660102012 |
| ENSMUSG000000003198 | 0.259272869  | 3.128172674  | 0.59026866  | 0.442315249 | 0.999071534 | Zfp959        | Zfp959        | ZNF788        |  | 6.456563086 | 6.699775018 | 10.36731393 | 7.423885401 | 9.744981678 | 8.14936209  | 10.28973166 | 8.497141644 | 9.035395336 | 8.692742279 |
| ENSMUSG00000060639  | -0.272846774 | 3.157590059  | 0.590174199 | 0.442351765 | 0.999071534 | Hist1h4i      | Hist1h4i      |               |  | 12.42186594 | 15.77115181 | 8.078426441 | 5.966861163 | 7.979112515 | 7.421740475 | 8.412988152 | 7.391822406 | 7.306884924 | 7.516280918 |
| ENSMUSG00000048938  | 0.343367412  | 2.192095306  | 0.589963767 | 0.44243313  | 0.999071534 | Nr1h5         | Nr1h5         |               |  | 5.193322482 | 1.185800888 | 5.452937848 | 3.677251647 | 4.839789558 | 6.039259406 | 4.983077598 | 5.250266382 | 3.064177549 | 4.967281302 |
| ENSMUSG00000024687  | -0.158911929 | 5.837782278  | 0.589924466 | 0.442448329 | 0.999071534 | Osbp          | Osbp          | OSBP          |  | 64.84635099 | 58.81572405 | 60.79015897 | 61.33378219 | 66.84141795 | 81.71190739 | 43.29453134 | 46.49249046 | 36.06301269 | 59.21522184 |
| ENSMUSG00000013846  | -0.185730198 | 7.29320555   | 0.589500854 | 0.4426122   | 0.999071534 | St3gal1       | St3gal1       | ST3GAL1       |  | 154.817154  | 200.22248   | 133.4959969 | 174.9122906 | 202.7479409 | 175.2840471 | 117.3288271 | 155.3664354 | 111.8817649 | 152.5478232 |
| ENSMUSG00000038116  | 0.206322173  | 6.089111402  | 0.588541359 | 0.442983721 | 0.999071534 | Phf20         | Phf20         | PHF20         |  | 50.66998422 | 61.12803578 | 76.81237141 | 68.8964318  | 69.19591017 | 59.44668596 | 39.34689844 | 86.07673568 | 79.35434165 | 77.84252673 |
| ENSMUSG000000003020 | 0.585188769  | -0.113067218 | 0.588409038 | 0.443034994 | 0.999071534 | Alox12        | Alox12        | ALOX12        |  | 0.280720134 | 0.711480533 | 1.077123525 | 0.971349492 | 0.196207685 | 1.382481069 | 0.647152935 | 0.345412262 | 0.628549241 | 1.699333077 |
| ENSMUSG00000027868  | -0.205164512 | 3.916124476  | 0.588354546 | 0.443056112 | 0.999071534 | Tbx15         | Tbx15         | TBX15         |  | 17.40464832 | 15.29683146 | 19.11894258 | 14.08456763 | 17.39708138 | 14.47967014 | 11.84289871 | 11.74401691 | 12.88525944 | 15.75151045 |
| ENSMUSG00000060519  | -0.161258243 | 5.311162838  | 0.588141357 | 0.443138746 | 0.999071534 | Tor3a         | Tor3a         | TOR3A         |  | 49.19620351 | 47.60990566 | 45.97971049 | 34.55228906 | 40.15717282 | 53.26190223 | 37.34072434 | 35.78471034 | 26.16336215 | 31.306944   |
| ENSMUSG00000020553  | 0.246774193  | 4.117079019  | 0.588088495 | 0.443159239 | 0.999071534 | Pctp          | Pctp          | PCTP          |  | 18.80824899 | 11.68013875 | 16.49345398 | 15.40282765 | 19.48996336 | 13.89757285 | 11.84289871 | 12.78025369 | 21.5278115  | 27.64684199 |
| ENSMUSG00000034673  | -0.167548456 | 5.302666265  | 0.587790483 | 0.443274799 | 0.999071534 | Pbx2          | Pbx2          | PBX2          |  | 44.63450133 | 47.96564593 | 44.70062631 | 35.52363855 | 43.68891115 | 42.85691314 | 25.62725622 | 42.69295558 | 32.44885456 | 34.96704601 |
| ENSMUSG00000060314  | 0.390607509  | 1.457270667  | 0.587746543 | 0.443291842 | 0.999071534 | Zfp941        | Zfp941        |               |  | 2.245761073 | 3.735272798 | 2.221567271 | 1.318260024 | 2.289089656 | 1.382481069 | 2.265035272 | 3.592287524 | 3.299883514 | 3.267948225 |
| ENSMUSG00000051339  | -0.213133091 | 4.324156828  | 0.587720481 | 0.443301951 | 0.999071534 | 2900026A02Rik | 2900026A02Rik | KIAA1671      |  | 22.45761073 | 27.62916069 | 19.45554368 | 18.24749402 | 23.47951961 | 35.94450779 | 13.97850339 | 17.2706131  | 10.21392516 | 15.68615148 |
| ENSMUSG00000024887  | -0.330522096 | 2.939451181  | 0.587655944 | 0.443326985 | 0.999071534 | Asah2         | Asah2         | ASAH2         |  | 6.877643287 | 15.83044186 | 3.500651458 | 6.244389589 | 11.38004572 | 10.69603774 | 7.701119924 | 7.322739954 | 2.985608894 | 4.705845444 |

|                     |              |              |             |             |             |               |               |               |             |             |             |             |             |             |             |             |             |             |
|---------------------|--------------|--------------|-------------|-------------|-------------|---------------|---------------|---------------|-------------|-------------|-------------|-------------|-------------|-------------|-------------|-------------|-------------|-------------|
| ENSMUSG00000048332  | -0.170763721 | 6.319304828  | 0.587639251 | 0.44333346  | 0.999071534 | Lhfp          | Lhfp          | LHFP          | 76.56641659 | 118.6986689 | 77.28361295 | 75.76526035 | 90.84415806 | 87.96945328 | 92.67230026 | 62.93411413 | 59.86931518 | 60.84919595 |
| ENSMUSG000000027203 | 0.181602206  | 6.832032523  | 0.587516167 | 0.443381212 | 0.999071534 | Dut           | Dut           | DUT           | 136.7107053 | 80.93091062 | 124.8790087 | 103.7956314 | 107.6526164 | 131.6995124 | 158.6171843 | 112.8807272 | 81.16142072 | 104.7050611 |
| ENSMUSG000000079480 | 0.274627357  | 4.662844276  | 0.587512894 | 0.443382482 | 0.999071534 | Pin4          | Pin4          | PIN4          | 14.45708691 | 14.64464097 | 32.65030687 | 36.21745962 | 18.96674286 | 12.95166475 | 23.68579741 | 30.94893867 | 32.05601128 | 27.90827784 |
| ENSMUSG000000045273 | 0.251914227  | 4.332702733  | 0.586570021 | 0.443748544 | 0.999071534 | Cenph         | Cenph         | CENPH         | 26.38769261 | 9.01208675  | 19.05162236 | 19.84328247 | 20.6018069  | 28.37724299 | 35.26983495 | 11.4676871  | 15.08518178 | 16.86261284 |
| ENSMUSG00000034926  | 0.504451623  | 3.897310721  | 0.586287913 | 0.44385816  | 0.999071534 | Dhcr24        | Dhcr24        | DHCR24        | 27.08949295 | 9.664277238 | 7.87646578  | 10.06040545 | 9.0255535   | 61.84783729 | 24.98010328 | 1.865226215 | 2.357059653 | 4.117614764 |
| ENSMUSG00000079457  | 0.563917946  | 0.933613509  | 0.586176117 | 0.443901612 | 0.999071534 | Gm7609        | Gm7609        |               | 1.122880537 | 3.083082309 | 0.807842644 | 0.346910533 | 2.223687094 | 0.509335131 | 0.582437641 | 1.036236786 | 3.771295445 | 3.660102012 |
| ENSMUSG00000034173  | 0.427320916  | 1.729031936  | 0.586050616 | 0.443950398 | 0.999071534 | 2410018M08Rik | Zbed5         | ZBED8         | 1.894860906 | 1.719411288 | 2.692808814 | 4.371072713 | 3.27012808  | 2.473913492 | 3.882917609 | 4.490359406 | 0.549980586 | 6.470537486 |
| ENSMUSG00000058492  | -0.499423176 | 3.414241067  | 0.585945605 | 0.443991225 | 0.999071534 | Scp2-ps2      | Scp2-ps2      |               | 18.87842902 | 13.7552903  | 6.260780492 | 10.33793388 | 15.10799173 | 15.86215121 | 17.21426807 | 6.700997882 | 0           | 5.359435089 |
| ENSMUSG00000023971  | -0.225897517 | 4.214312206  | 0.585888122 | 0.444013576 | 0.999071534 | Rrp36         | Rrp36         | RRP36         | 25.96661241 | 20.92938568 | 13.80064517 | 15.12529923 | 28.05769892 | 25.17570789 | 23.36222095 | 13.33291331 | 9.428238612 | 13.20251083 |
| ENSMUSG000000062846 | -1.409604558 | 1.429877643  | 0.585817768 | 0.444040934 | 0.999071534 | Gm14176       | Gm14176       |               | 0           | 16.60121243 | 0           | 0           | 2.746907587 | 0           | 6.730390522 | 0           | 0           | 0           |
| ENSMUSG000000097439 | 0.404511946  | 1.944418988  | 0.585806866 | 0.444045174 | 0.999071534 | Gm16754       | Gm16754       |               | 2.947561409 | 2.490181865 | 4.645095204 | 3.191576901 | 3.335530641 | 1.45524323  | 1.423736457 | 5.664761096 | 4.792687961 | 6.209101628 |
| ENSMUSG000000091421 | -1.458183749 | 2.299231859  | 0.585677216 | 0.444095598 | 0.999071534 | Gm4202        | Gm4202        |               | 20.49256979 | 16.48263235 | 0           | 0           | 0           | 15.1345296  | 0           | 0           | 0           | 0           |
| ENSMUSG000000032536 | -0.214807076 | 4.700661918  | 0.585666611 | 0.444099723 | 0.999071534 | Trak1         | Trak1         | TRAK1         | 30.31777449 | 41.32516095 | 19.59018412 | 21.64721724 | 32.17806031 | 44.96701582 | 20.57946333 | 21.7609725  | 12.33527885 | 21.30702243 |
| ENSMUSG000000057375 | -0.226221861 | 4.896115236  | 0.585398243 | 0.444204127 | 0.999071534 | Yipf1         | Yipf1         | YIPF1         | 45.96792197 | 37.41201802 | 27.66861056 | 31.15256584 | 23.93733754 | 32.01535107 | 47.37159483 | 18.37593234 | 12.80669078 | 24.57497065 |
| ENSMUSG000000070304 | -0.644119477 | 0.057932632  | 0.585366567 | 0.444216452 | 0.999071534 | Scn2b         | Scn2b         | SCN2B         | 1.122880537 | 0.237160178 | 2.356207712 | 1.110113705 | 0.915635862 | 1.164194584 | 0.776583522 | 0           | 1.021392516 | 0.457512752 |
| ENSMUSG000000035413 | -0.193993943 | 5.071753116  | 0.585316767 | 0.444235832 | 0.999071534 | Tmem98        | Tmem98        | TMEM98        | 44.3537812  | 32.49094434 | 31.775144   | 37.95201228 | 39.11073183 | 53.98952385 | 37.98787727 | 18.58317969 | 18.77790857 | 27.38540613 |
| ENSMUSG000000043421 | -0.29942042  | 5.436160548  | 0.58506444  | 0.444334041 | 0.999071534 | Hilpda        | Hilpda        | HILPDA        | 43.7221609  | 98.06573345 | 42.14245793 | 28.79357422 | 35.90600632 | 14.26138366 | 33.00479967 | 73.22739954 | 24.74912636 | 36.86245598 |
| ENSMUSG000000024410 | 0.180164005  | 4.961114556  | 0.585052028 | 0.444338873 | 0.999071534 | 3110002H16Rik | 3110002H16Rik | C18orf8       | 34.66893657 | 36.46337731 | 24.1679591  | 24.28373729 | 31.91645006 | 29.6869619  | 33.84609849 | 31.22526848 | 33.941659   | 27.64684199 |
| ENSMUSG000000040365 | -0.195103602 | 4.756453366  | 0.585026502 | 0.44434881  | 0.999071534 | Trim41        | Trim41        | TRIM41        | 25.12445201 | 34.9811262  | 25.51436351 | 28.44666369 | 35.12117558 | 30.77839432 | 16.30825396 | 32.39967017 | 15.3994564  | 27.77755991 |
| ENSMUSG000000019782 | 0.197466079  | 7.056343179  | 0.584916187 | 0.444391759 | 0.999071534 | Rwdd1         | Rwdd1         | RWDD1         | 166.2564995 | 109.7458722 | 132.2169128 | 109.5543462 | 126.9463721 | 118.5295611 | 197.0580686 | 111.2227484 | 130.5811048 | 119.606905  |
| ENSMUSG000000021481 | 0.209117763  | 3.969580324  | 0.584910981 | 0.444393786 | 0.999071534 | Zfp346        | Zfp346        | ZNF346        | 19.29950922 | 15.77115181 | 14.54116759 | 9.227820171 | 16.48144552 | 21.10102684 | 17.79670571 | 14.09282029 | 12.64955347 | 15.68615148 |
| ENSMUSG000000044938 | 0.56494419   | 0.21186806   | 0.584668212 | 0.444488326 | 0.999071534 | Klh31         | Klh31         | KLHL31        | 0.631620302 | 0.652190488 | 1.615685288 | 0.971349492 | 0.457817931 | 0.436572969 | 0.582437641 | 0.967154334 | 2.514196963 | 1.045743432 |
| ENSMUSG000000021144 | -0.173138561 | 6.152884157  | 0.584665821 | 0.444489258 | 0.999071534 | Mta1          | Mta1          | MTA1          | 60.77590905 | 82.70961195 | 85.83328094 | 74.65514665 | 86.65839411 | 90.80717758 | 42.51794782 | 71.15492597 | 54.99805857 | 65.81647726 |
| ENSMUSG000000021428 | 0.223770406  | 4.971552041  | 0.584047735 | 0.444730097 | 0.999071534 | Riok1         | Riok1         | RIOK1         | 24.70337181 | 28.044191   | 40.59409287 | 28.86295632 | 27.0766605  | 26.12161599 | 21.61490802 | 27.77114586 | 47.7697423  | 32.41804639 |
| ENSMUSG000000005950 | 0.485288811  | 1.184802724  | 0.583852722 | 0.444806127 | 0.999071534 | P2rx5         | P2rx5         | P2RX5-TAX1BP3 | 3.36864161  | 0.889350666 | 3.769932339 | 0.346910533 | 0.981038424 | 3.34705943  | 1.812028217 | 1.105319238 | 2.042785033 | 3.92153787  |
| ENSMUSG000000027931 | -0.346066043 | 1.906851828  | 0.583711651 | 0.444861139 | 0.999071534 | Npr1          | Npr1          | NPR1          | 5.474042616 | 5.276813952 | 3.164050356 | 4.02416218  | 3.073920395 | 5.966497245 | 3.559341141 | 2.901463001 | 1.257098482 | 2.418281687 |
| ENSMUSG000000040472 | 0.175427666  | 5.002758405  | 0.583317248 | 0.445014995 | 0.999071534 | Rabggtta      | Rabggtta      | RABGGTA       | 37.82703808 | 24.54607838 | 30.63070026 | 33.71970378 | 28.71172454 | 38.05461048 | 24.13880447 | 34.40306129 | 29.07040239 | 37.64676355 |
| ENSMUSG000000032763 | -0.189626195 | 5.76225868   | 0.58330166  | 0.445021078 | 0.999071534 | Ilvbl         | Ilvbl         | ILVBL         | 73.19777498 | 74.82403604 | 36.48755943 | 56.75456316 | 58.927708   | 44.74872934 | 72.09283694 | 48.77221139 | 31.97744262 | 47.3198903  |
| ENSMUSG000000071537 | 0.524261382  | 0.158274194  | 0.583238038 | 0.445045905 | 0.999071534 | Klrg2         | Klrg2         | KLRG2         | 1.614140771 | 0.652190488 | 0.875162864 | 0.346910533 | 0.719428178 | 2.40115133  | 1.553167044 | 0.690824524 | 0.471411931 | 0.784307574 |
| ENSMUSG000000064193 | -1.273338543 | 6.784691558  | 0.583226515 | 0.445050402 | 0.999071534 | Gm4735        | Gm4735        |               | 355.0407897 | 466.9090997 | 0.605881983 | 0           | 1.896674286 | 238.3688411 | 120.3057306 | 0.138164905 | 0           | 0           |
| ENSMUSG000000075707 | 0.992713921  | -0.060837365 | 0.583025068 | 0.445129028 | 0.999071534 | Dio3          | Dio3          | DIO3          | 1.403600671 | 0           | 0.807842644 | 0           | 0.654025616 | 2.037340523 | 3.365195261 | 0           | 0           | 0.261435858 |
| ENSMUSG000000056148 | 0.667190802  | -0.148991076 | 0.582901298 | 0.445177346 | 0.999071534 | Rdh9          | Rdh9          | RDH16         | 0.701800335 | 1.007930755 | 0.336601102 | 0.416292639 | 0.654025616 | 0.436572969 | 0           | 2.003391119 | 0.942823861 | 1.045743432 |
| ENSMUSG000000028672 | -0.216896713 | 4.881922809  | 0.582816724 | 0.445210368 | 0.999071534 | Hmgcl         | Hmgcl         | HMGCL         | 48.14350301 | 33.380295   | 22.75423448 | 27.75284262 | 32.50507311 | 26.33990247 | 44.13583015 | 22.31363212 | 13.19953406 | 26.99325234 |
| ENSMUSG000000049086 | -0.473146038 | 1.437584716  | 0.582695522 | 0.445257698 | 0.999071534 | Bmyc          | Bmyc          |               | 4.631882214 | 1.185800888 | 2.760129034 | 2.567137942 | 4.447374189 | 4.001918884 | 1.747312924 | 2.901463001 | 0.078586655 | 2.287563758 |
| ENSMUSG000000074151 | 0.254002891  | 5.196146594  | 0.582349945 | 0.445392689 | 0.999071534 | Nlrc5         | Nlrc5         | NLRCS         | 37.26559781 | 26.44335981 | 30.36141937 | 37.81324807 | 40.94200356 | 37.47251318 | 10.80745401 | 43.03836784 | 40.30572007 | 56.86229912 |
| ENSMUSG000000020412 | -0.170525107 | 5.517524352  | 0.582248639 | 0.445432274 | 0.999071534 | Ascc2         | Ascc2         | ASCC2         | 51.72268472 | 48.79570655 | 53.78885605 | 43.57196291 | 53.69550307 | 55.95410221 | 29.51017383 | 42.48570822 | 27.34189197 | 55.75119672 |
| ENSMUSG000000024529 | -0.296882577 | 6.292060845  | 0.5820927   | 0.445493216 | 0.999071534 | Lox           | Lox           | LOX           | 39.51135888 | 161.7432411 | 88.39144931 | 62.99895275 | 96.59958348 | 40.96509694 | 75.84632396 | 137.6122452 | 28.59899046 | 54.24794054 |
| ENSMUSG000000028568 | 0.182234344  | 6.331672164  | 0.58203224  | 0.445516849 | 0.999071534 | Btf3l4        | Btf3l4        | BTF3L4        | 67.86409243 | 69.60651213 | 85.22739895 | 84.22987735 | 83.25746091 | 62.35717242 | 92.86644614 | 107.2159661 | 70.39751497 | 73.33275817 |
| ENSMUSG000000006373 | 0.229378244  | 8.440168735  | 0.582006774 | 0.445526803 | 0.999071534 | Pgrmc1        | Pgrmc1        | PGRMC1        | 289.9838986 | 325.798794  | 306.7782441 | 380.5608544 | 351.473366  | 209.2639765 | 360.5289    | 463.3360082 | 391.9790203 | 321.8929002 |

|                     |              |              |             |             |             |          |          |          |  |  |             |             |             |             |             |             |             |             |             |             |
|---------------------|--------------|--------------|-------------|-------------|-------------|----------|----------|----------|--|--|-------------|-------------|-------------|-------------|-------------|-------------|-------------|-------------|-------------|-------------|
| ENSMUSG0000009597   | 0.221000943  | 9.656659922  | 0.581722322 | 0.445638017 | 0.999071534 | Gm6472   | Gm6472   |          |  |  | 896.6902886 | 809.1905261 | 697.6394434 | 726.1531271 | 743.7579305 | 633.5401404 | 1398.691638 | 801.1492004 | 578.5010075 | 764.3077309 |
| ENSMUSG000000026199 | 0.268930202  | 4.192027516  | 0.581673699 | 0.445657031 | 0.999071534 | Ankzf1   | Ankzf1   | ANKZF1   |  |  | 13.47456644 | 19.0913943  | 15.07972936 | 14.08456763 | 24.00274011 | 9.240794513 | 10.80745401 | 23.55711627 | 22.15636074 | 26.07822684 |
| ENSMUSG00000038302  | 0.281202829  | 2.963518732  | 0.581622455 | 0.445677072 | 0.999071534 | Lace1    | Lace1    | LACE1    |  |  | 6.526743119 | 9.54569715  | 5.250977187 | 5.064893778 | 9.744981678 | 6.839643183 | 8.671849326 | 5.941090906 | 8.799689371 | 9.607767782 |
| ENSMUSG00000073802  | -0.185494021 | 5.596528859  | 0.581494039 | 0.445727301 | 0.999071534 | Cdkn2b   | Cdkn2b   | CDKN2B   |  |  | 43.3010807  | 39.36858949 | 58.97251302 | 65.6354728  | 57.94666957 | 49.9148428  | 46.14200425 | 26.66582662 | 42.74134837 | 51.89501782 |
| ENSMUSG00000034758  | 0.243413176  | 4.730276229  | 0.581309057 | 0.445799669 | 0.999071534 | Tle6     | Tle6     | TLE6     |  |  | 23.86122114 | 27.86632087 | 21.20586941 | 20.95339618 | 32.11265774 | 14.1886215  | 17.21426807 | 40.4823171  | 23.64916518 | 39.01930181 |
| ENSMUSG00000029310  | -0.198641886 | 7.198268796  | 0.58117192  | 0.445853332 | 0.999071534 | Nudt9    | Nudt9    | NUDT9    |  |  | 129.4821619 | 165.1227737 | 157.9332369 | 155.9015934 | 206.1488742 | 118.6750854 | 103.5444696 | 177.5419027 | 98.91793677 | 156.9268738 |
| ENSMUSG00000047875  | 0.454144619  | 1.244438753  | 0.581125918 | 0.445871335 | 0.999071534 | Gpr157   | Gpr157   | GPRI57   |  |  | 1.824680872 | 3.260952442 | 1.211763966 | 0.555056852 | 3.073920395 | 2.473913492 | 0.647152935 | 3.246875263 | 2.828471584 | 3.071871332 |
| ENSMUSG00000008393  | -0.183544443 | 7.374001514  | 0.581094102 | 0.445883787 | 0.999071534 | Carhsp1  | Carhsp1  | CARHSP1  |  |  | 171.4498219 | 207.5151554 | 185.8038081 | 168.3209905 | 182.5385494 | 177.466912  | 128.7187187 | 191.9110528 | 116.2030409 | 137.9074151 |
| ENSMUSG00000037443  | 0.217606169  | 3.818412832  | 0.581062885 | 0.445896005 | 0.999071534 | Cep85    | Cep85    | CEP85    |  |  | 13.96582667 | 14.40748079 | 11.44443746 | 13.04383603 | 14.25775843 | 21.82864846 | 14.49622574 | 9.947873145 | 14.84947581 | 12.02604947 |
| ENSMUSG00000037921  | -0.260640321 | 3.421602763  | 0.580643944 | 0.446060026 | 0.999071534 | Ddx60    | Ddx60    | DDX60    |  |  | 11.01826527 | 12.03587901 | 11.44443746 | 15.74973819 | 9.221761185 | 9.968416129 | 5.371369359 | 13.19474841 | 8.642552061 | 8.888819173 |
| ENSMUSG00000025192  | -0.244882774 | 3.461925598  | 0.580504269 | 0.446114732 | 0.999071534 | Entpd7   | Entpd7   | ENTPD7   |  |  | 14.52726694 | 10.43504782 | 15.2143698  | 9.019673851 | 12.29568158 | 15.1345296  | 9.060141087 | 6.079255811 | 9.585375922 | 8.823460208 |
| ENSMUSG00000032691  | -0.360373562 | 2.665474254  | 0.580471383 | 0.446127613 | 0.999071534 | Nlrp3    | Nlrp3    | NLRP3    |  |  | 12.3516859  | 11.68013875 | 4.577774983 | 2.844666369 | 5.166802366 | 11.71470801 | 3.818202315 | 3.661369977 | 2.514196963 | 6.078383699 |
| ENSMUSG00000087040  | 0.555971396  | 0.407518494  | 0.580362408 | 0.446170304 | 0.999071534 | Gm14033  | Gm14033  |          |  |  | 0.561440268 | 0.355740266 | 1.481044848 | 2.01208109  | 0.588623054 | 0.727621615 | 0.970729402 | 0.759906976 | 2.907040239 | 1.111102397 |
| ENSMUSG00000031521  | 0.189738323  | 5.353448964  | 0.58010481  | 0.446271242 | 0.999071534 | Aga      | Aga      | AGA      |  |  | 40.07279915 | 47.37274548 | 26.32220615 | 46.00033664 | 37.41026523 | 31.36049162 | 46.59501131 | 38.61709089 | 38.18436638 | 51.50286403 |
| ENSMUSG00000040606  | 0.54001805   | 0.552208317  | 0.58002392  | 0.446302945 | 0.999071534 | Kazn     | Kazn     | KAZN     |  |  | 2.105401006 | 0.711480533 | 1.548365068 | 0.20814632  | 1.111843547 | 2.910486461 | 3.17104938  | 0.759906976 | 0.471411931 | 0.71894861  |
| ENSMUSG00000037594  | 0.207960242  | 5.247593267  | 0.579819104 | 0.446383235 | 0.999071534 | BC022687 | BC022687 | C14orf79 |  |  | 36.49361744 | 52.53097934 | 26.32220615 | 23.45115201 | 44.86615725 | 28.7410538  | 44.32997603 | 51.9500042  | 33.941659   | 33.59450776 |
| ENSMUSG00000036676  | 0.182689362  | 5.828349409  | 0.579319311 | 0.446579253 | 0.999071534 | Tmtc3    | Tmtc3    | TMTC3    |  |  | 41.26585972 | 60.35726521 | 51.634609   | 43.50258081 | 80.05273539 | 62.86650756 | 65.62130759 | 77.09601687 | 41.87709317 | 44.3787369  |
| ENSMUSG00000023805  | -0.19948257  | 4.717619123  | 0.579093126 | 0.446668006 | 0.999071534 | Synj2    | Synj2    | SYNJ2    |  |  | 27.01931291 | 36.40408727 | 26.65880726 | 22.13289199 | 33.68231922 | 33.97992943 | 18.37914335 | 25.8368372  | 11.5495923  | 31.24158503 |
| ENSMUSG00000053552  | -0.417091964 | 1.557008132  | 0.578939503 | 0.446728303 | 0.999071534 | Ebf4     | Ebf4     | EBF4     |  |  | 3.438821644 | 4.624623464 | 2.760129034 | 2.914048475 | 2.943115272 | 1.964578361 | 0.388291761 | 3.17779281  | 2.042785033 | 3.856178906 |
| ENSMUSG00000022148  | 0.204265732  | 6.227100846  | 0.578779487 | 0.446791121 | 0.999071534 | Fyb      | Fyb      | FYB      |  |  | 76.07515636 | 56.56270236 | 84.01563499 | 82.56470679 | 60.03955155 | 57.40934544 | 60.37936882 | 65.21383506 | 95.46091594 | 95.35872921 |
| ENSMUSG00000057236  | 0.205296388  | 8.323559172  | 0.578201491 | 0.447018144 | 0.999071534 | Rbbp4    | Rbbp4    | RBBP4    |  |  | 366.4099551 | 294.6122307 | 281.8697626 | 312.8439184 | 288.229089  | 343.9467375 | 481.4170682 | 267.4872557 | 273.4189197 | 289.8016486 |
| ENSMUSG00000052852  | -0.404087699 | 2.579484182  | 0.578125482 | 0.447048011 | 0.999071534 | Reep1    | Reep1    | REEP1    |  |  | 8.491784059 | 9.723567283 | 7.270583797 | 3.885397967 | 5.363010051 | 7.931075606 | 6.665675228 | 0.345412262 | 3.69272679  | 6.339819557 |
| ENSMUSG00000029397  | 0.160779001  | 5.937116672  | 0.578058752 | 0.447074236 | 0.999071534 | Rchy1    | Rchy1    | RCHY1    |  |  | 63.09185015 | 54.01323045 | 57.35682773 | 58.41973371 | 67.03762564 | 62.2116481  | 81.60598508 | 60.99980546 | 43.44846627 | 64.443939   |
| ENSMUSG00000036686  | -0.193569244 | 4.782948292  | 0.577924075 | 0.44712717  | 0.999071534 | Cc2d1a   | Cc2d1a   | CC2D1A   |  |  | 26.31751258 | 31.48301358 | 28.4764532  | 27.82222473 | 37.86808316 | 27.35857273 | 15.20809397 | 32.33058772 | 18.93504588 | 29.67296989 |
| ENSMUSG00000083041  | -1.256245285 | -0.222295049 | 0.577655756 | 0.44723266  | 0.999071534 | Gm9835   | Gm9835   |          |  |  | 0           | 3.083082309 | 0           | 0           | 2.158284533 | 0.145524323 | 1.876743511 | 0           | 0           | 0           |
| ENSMUSG00000038150  | -0.174852849 | 5.197833699  | 0.577602424 | 0.447253632 | 0.999071534 | Ormdl3   | Ormdl3   | ORMDL3   |  |  | 33.6864161  | 52.23452912 | 35.67971678 | 30.45874478 | 50.16376474 | 43.07519962 | 34.36382084 | 37.23544184 | 20.34928167 | 33.72522568 |
| ENSMUSG00000054414  | 0.163174392  | 5.414169027  | 0.577484996 | 0.447299814 | 0.999071534 | Slc30a7  | Slc30a7  | SLC30A7  |  |  | 40.07279915 | 52.23452912 | 41.06533441 | 33.44217536 | 41.92304198 | 58.71906435 | 48.53647011 | 35.9919577  | 38.65577831 | 36.66637909 |
| ENSMUSG00000019792  | 0.230078385  | 4.099934344  | 0.5774695   | 0.447305909 | 0.999071534 | Trmt11   | Trmt11   | TRMT11   |  |  | 17.61518842 | 15.83044186 | 17.83985839 | 14.43147816 | 15.69661478 | 21.68312413 | 32.09878557 | 11.95126426 | 9.663944577 | 15.22863873 |
| ENSMUSG00000021548  | 0.174885897  | 5.343874092  | 0.577306212 | 0.447370141 | 0.999071534 | Ccnh     | Ccnh     | CCNH     |  |  | 34.24785637 | 29.94147243 | 48.67251931 | 39.47841863 | 44.80075469 | 44.74872934 | 46.07728896 | 36.75186467 | 43.52703492 | 33.98666154 |
| ENSMUSG00000047632  | 0.349673821  | 2.190889316  | 0.577160063 | 0.447427643 | 0.999071534 | Fgfbp3   | Fgfbp3   | FGFBP3   |  |  | 3.438821644 | 2.490181865 | 2.962089695 | 6.660682229 | 4.51277675  | 2.910486461 | 4.724216424 | 3.385040167 | 5.421237202 | 6.862691273 |
| ENSMUSG00000028136  | -0.156756982 | 5.864318901  | 0.577137008 | 0.447436715 | 0.999071534 | Snx27    | Snx27    | SNX27    |  |  | 65.82887146 | 70.85160307 | 58.2319906  | 56.82394526 | 66.97222307 | 85.78658843 | 53.19597124 | 41.72580125 | 40.22715141 | 50.91463335 |
| ENSMUSG00000059796  | 0.195456485  | 9.681063932  | 0.577055929 | 0.447468622 | 0.999071534 | Eif4a1   | Eif4a1   | EIF4A1   |  |  | 678.5707443 | 762.1735209 | 855.774641  | 714.0806406 | 967.2384834 | 993.6400777 | 1092.5883   | 836.0358389 | 597.2789161 | 752.4123994 |
| ENSMUSG00000033355  | -0.195868962 | 5.060714205  | 0.57682942  | 0.447557778 | 0.999071534 | Rtp4     | Rtp4     | RTP4     |  |  | 36.21289731 | 33.32100496 | 44.0274241  | 38.57645124 | 31.65483981 | 33.32506998 | 16.8259763  | 39.72241013 | 21.76351746 | 38.36571216 |
| ENSMUSG00000038481  | -0.16227561  | 5.584761456  | 0.576447166 | 0.447708298 | 0.999071534 | Cdk19    | Cdk19    | CDK19    |  |  | 44.3537812  | 58.63785392 | 55.67382222 | 48.84500301 | 54.87274918 | 48.16855093 | 32.42236203 | 49.39395346 | 40.69856334 | 46.07806998 |
| ENSMUSG00000022130  | 0.202814216  | 5.03159331   | 0.576190439 | 0.447809433 | 0.999071534 | Tgds     | Tgds     | TGDS     |  |  | 39.02009865 | 32.3130742  | 31.37122268 | 27.12840366 | 27.73068612 | 32.74297269 | 59.60278529 | 22.03730231 | 25.53481291 | 28.82330335 |
| ENSMUSG00000060572  | 0.736278737  | 0.035929325  | 0.576127313 | 0.447834307 | 0.999071534 | Mfap2    | Mfap2    | MFAP2    |  |  | 0.350900168 | 0.5336104   | 1.88496617  | 0.138764213 | 0.523220493 | 2.328389169 | 2.718042326 | 0.138164905 | 0           | 0.588230681 |
| ENSMUSG00000089782  | -0.56931318  | -0.111282678 | 0.575942902 | 0.447906982 | 0.999071534 | Gm3531   | Gm3531   |          |  |  | 1.122880537 | 1.067220799 | 0.269280881 | 1.248877918 | 1.177246109 | 0.509335131 | 1.164875283 | 0.898071881 | 0.235705965 | 0.261435858 |
| ENSMUSG00000041598  | -0.18876504  | 4.895964716  | 0.57589778  | 0.447924767 | 0.999071534 | Cdc42ep4 | Cdc42ep4 | CDC42EP4 |  |  | 40.63423942 | 36.81911758 | 26.12024549 | 25.11632257 | 36.102214   | 46.42225905 | 29.44545853 | 25.62958984 | 15.16375043 | 22.02597104 |
| ENSMUSG00000025193  | 0.31904559   | 2.262492516  | 0.575827306 | 0.447952547 | 0.999071534 | Cutc     | Cutc     | CUTC     |  |  | 3.649361744 | 4.150303108 | 6.866662475 | 2.636520049 | 4.316569065 | 3.783632399 | 5.694945826 | 6.839162787 | 3.299883514 | 5.22871716  |

|                     |              |              |             |             |             |               |               |          |             |             |             |             |             |             |             |             |             |             |
|---------------------|--------------|--------------|-------------|-------------|-------------|---------------|---------------|----------|-------------|-------------|-------------|-------------|-------------|-------------|-------------|-------------|-------------|-------------|
| ENSMUSG00000059288  | -0.21668376  | 4.041496776  | 0.575755409 | 0.447980891 | 0.999071534 | Cdyl          | Cdyl          | CDY2A    | 18.10644865 | 18.26133368 | 15.41633046 | 21.02277828 | 18.11650956 | 25.75780518 | 17.40841395 | 10.1551205  | 11.31388633 | 10.45743432 |
| ENSMUSG00000041633  | -0.344851817 | 1.708443501  | 0.575608624 | 0.448038766 | 0.999071534 | Kctd12b       | Kctd12b       |          | 3.509001677 | 2.727342043 | 4.510454763 | 3.399723221 | 4.054958819 | 4.584016176 | 3.235764674 | 1.934308667 | 2.357059653 | 1.503256184 |
| ENSMUSG00000032342  | 0.260294427  | 3.168656497  | 0.575527273 | 0.448052921 | 0.999071534 | Mto1          | Mto1          | MTO1     | 7.158363421 | 11.68013875 | 6.799342255 | 7.146356975 | 9.156358623 | 15.4983404  | 10.80745401 | 5.941090906 | 6.914041649 | 8.758101244 |
| ENSMUSG00000053094  | -0.180383806 | 5.766904589  | 0.575551614 | 0.448061248 | 0.999071534 | Tmem248       | Tmem248       | TMEM248  | 61.82860955 | 72.92675462 | 56.41434465 | 45.23713347 | 64.48692573 | 81.93019387 | 60.37936882 | 46.1470782  | 23.57059653 | 43.52907036 |
| ENSMUSG00000020185  | 0.224310505  | 4.294962036  | 0.575230916 | 0.448187745 | 0.999071534 | E2f7          | E2f7          | E2F7     | 19.72058943 | 11.26510844 | 24.23527932 | 17.83120138 | 20.27479409 | 33.61611862 | 16.17882337 | 13.26383086 | 22.47063536 | 16.86261284 |
| ENSMUSG00000022018  | 0.257013734  | 6.430869001  | 0.574962652 | 0.448293602 | 0.999071534 | Rgcc          | Rgcc          | RGCC     | 58.74068807 | 62.31383667 | 86.84308424 | 113.1622158 | 83.12665579 | 37.32698886 | 64.71529348 | 140.5137082 | 92.08246377 | 100.3260105 |
| ENSMUSG00000050821  | 0.325053089  | 2.406034367  | 0.574959428 | 0.448294875 | 0.999071534 | Fam131a       | Fam131a       | FAM131A  | 4.982782381 | 5.691844263 | 2.894769475 | 4.787365352 | 5.493815174 | 4.365729691 | 2.912188207 | 7.322739954 | 7.071178959 | 5.163358196 |
| ENSMUSG00000062075  | 0.212237662  | 4.630709241  | 0.57487141  | 0.448329615 | 0.999071534 | Lmnb2         | Lmnb2         | LMNB2    | 34.9496567  | 19.50642461 | 21.20586941 | 19.14946141 | 24.26435035 | 48.38683741 | 28.02172208 | 15.19813953 | 17.12796681 | 24.1174579  |
| ENSMUSG00000081305  | 0.771170462  | -0.186167446 | 0.574860966 | 0.448333738 | 0.999071534 | Gm12879       | Gm12879       |          | 0           | 0.5336104   | 2.01960661  | 0           | 0.327012808 | 0.727621615 | 0.258861174 | 1.312566595 | 0.942823861 | 1.241820326 |
| ENSMUSG00000018387  | 0.257756956  | 3.42278292   | 0.574520067 | 0.448468332 | 0.999071534 | Shroom1       | Shroom1       | SHROOM1  | 9.193584394 | 10.49433786 | 9.222870187 | 10.33793388 | 10.79142266 | 11.86023233 | 5.75966112  | 17.13244819 | 9.113963991 | 11.56853672 |
| ENSMUSG00000030706  | 0.190842519  | 5.04524076   | 0.574394363 | 0.448517978 | 0.999071534 | Mrpl48        | Mrpl48        | MRPL48   | 38.52883841 | 29.76360229 | 25.44704329 | 36.28684173 | 29.10413991 | 28.15895651 | 48.86004658 | 26.73490908 | 32.05601128 | 31.17622607 |
| ENSMUSG00000032786  | -0.186706889 | 4.943821301  | 0.573882171 | 0.448720356 | 0.999071534 | Alas1         | Alas1         | ALAS1    | 43.3010807  | 23.8938879  | 36.68952009 | 30.04245214 | 35.84060375 | 47.80474012 | 30.35147264 | 23.14262155 | 16.34228026 | 25.75143201 |
| ENSMUSG00000046057  | 0.580536612  | 3.120042539  | 0.573649522 | 0.448812327 | 0.999071534 | Gm15428       | Gm15428       |          | 14.17636678 | 6.166164618 | 3.702612119 | 3.81601586  | 8.109917638 | 15.71662689 | 28.99245148 | 2.625133191 | 0           | 5.490153018 |
| ENSMUSG00000022827  | 0.314526183  | 2.401288808  | 0.573456829 | 0.448888525 | 0.999071534 | Rab3          | Rab3          | RABL3    | 5.75476275  | 5.691844263 | 3.971893    | 4.02416218  | 4.447374189 | 8.076599929 | 6.342098761 | 7.184575049 | 1.649941757 | 5.294076125 |
| ENSMUSG00000037536  | 0.223739961  | 3.827808813  | 0.573161719 | 0.449005262 | 0.999071534 | Fbxo34        | Fbxo34        | FBXO34   | 13.61492651 | 12.39161928 | 11.71371834 | 12.55816129 | 17.26627626 | 22.41074575 | 17.40841395 | 13.33291331 | 6.678335683 | 15.88222837 |
| ENSMUSG00000036391  | 0.190170227  | 4.752600503  | 0.573091737 | 0.449032952 | 0.999071534 | Sec24a        | Sec24a        | SEC24A   | 20.07148959 | 28.044191   | 27.60129034 | 24.28373729 | 30.08517833 | 31.43325378 | 20.45003274 | 37.37360675 | 25.77051887 | 22.15668897 |
| ENSMUSG00000030691  | 0.196838583  | 4.250440224  | 0.572887601 | 0.449113737 | 0.999071534 | Fchs2         | Fchs2         | FCHSD2   | 19.65040939 | 18.20204363 | 16.76273487 | 15.61097397 | 21.51744277 | 29.90524839 | 22.97392919 | 14.99089217 | 11.23531768 | 21.30702243 |
| ENSMUSG00000036459  | 0.202173569  | 4.878393125  | 0.572696078 | 0.449189551 | 0.999071534 | Wtip          | Wtip          | WTIP     | 23.93139144 | 27.56987065 | 30.63070026 | 31.36071216 | 27.40367331 | 24.37532411 | 21.09718567 | 46.00891329 | 27.10618601 | 29.93440574 |
| ENSMUSG00000050860  | -0.34010757  | 1.957919693  | 0.572691485 | 0.44919137  | 0.999071534 | Phospho1      | Phospho1      | PHOSPHO1 | 4.702062247 | 7.055515284 | 3.096730136 | 3.052812688 | 3.924153696 | 2.110102684 | 4.206494076 | 3.039627905 | 3.299883514 | 2.941153403 |
| ENSMUSG00000021238  | -0.248503868 | 3.819434714  | 0.572460731 | 0.449282741 | 0.999071534 | Aldh6a1       | Aldh6a1       | ALDH6A1  | 9.193584394 | 15.3561215  | 16.02221244 | 20.46772143 | 17.26627626 | 11.27813504 | 7.506974044 | 15.9580465  | 12.41384751 | 13.46394669 |
| ENSMUSG00000041642  | -0.271628921 | 4.255162125  | 0.57230753  | 0.44934342  | 0.999071534 | Klf21b        | Klf21b        | KLF21B   | 16.70284798 | 31.83875385 | 23.96599844 | 15.26406344 | 20.20939153 | 14.40690798 | 8.218842272 | 32.81416489 | 9.506807267 | 17.71227938 |
| ENSMUSG00000074358  | -0.229125915 | 3.512295852  | 0.57224162  | 0.449369529 | 0.999071534 | Ccdc61        | Ccdc61        | CCDC61   | 15.08870721 | 10.07930755 | 12.72352164 | 10.68484441 | 14.78097892 | 14.1886215  | 7.830550511 | 8.842553906 | 9.742513232 | 9.803844676 |
| ENSMUSG00000081121  | -1.266934338 | -1.232538901 | 0.572086552 | 0.449430965 | 0.999071534 | Gm12791       | Gm12791       |          | 1.052700503 | 1.067220799 | 0           | 0           | 0           | 0           | 0.711868228 | 0.069082452 | 0           | 0           |
| ENSMUSG00000026784  | 0.282410283  | 3.296976011  | 0.572017824 | 0.449458199 | 0.999071534 | Pdss1         | Pdss1         | PDS1     | 11.5095255  | 4.624623464 | 13.59868451 | 7.63203172  | 8.109917638 | 15.42557824 | 13.59021163 | 6.148338263 | 9.585375922 | 7.320204025 |
| ENSMUSG00000075000  | 0.165561534  | 5.206024809  | 0.571936803 | 0.449490307 | 0.999071534 | Nrbf2         | Nrbf2         | NRBF2    | 36.84451761 | 27.80703083 | 38.10324471 | 32.74835429 | 44.80075469 | 40.23747532 | 35.65812671 | 43.10745029 | 27.8133039  | 41.37222453 |
| ENSMUSG00000098332  | -0.286086671 | 3.381672636  | 0.571790282 | 0.449548382 | 0.999071534 | RP24-176F12.8 | 2310009A05Rik |          | 10.94808523 | 5.632554219 | 13.39672385 | 18.80255087 | 9.221761185 | 7.712789121 | 7.312828163 | 8.013564478 | 10.60676844 | 9.999921569 |
| ENSMUSG00000049891  | -0.618950385 | 1.525720426  | 0.571685886 | 0.449589767 | 0.999071534 | Gm7984        | Gm7984        |          | 8.140883891 | 3.675982753 | 1.88496617  | 0.277528426 | 3.531738326 | 5.457162114 | 4.724216424 | 0.828989429 | 0.235705965 | 0.130717929 |
| ENSMUSG00000060206  | 0.223124491  | 4.099815167  | 0.571165095 | 0.44979631  | 0.999071534 | Zfp462        | Zfp462        | ZNF462   | 10.94808523 | 15.8897319  | 21.13854919 | 13.87642131 | 19.68617104 | 22.04693494 | 10.9368846  | 21.13923043 | 18.22792798 | 15.62079252 |
| ENSMUSG00000060038  | 0.180597788  | 5.397952751  | 0.571160452 | 0.449798152 | 0.999071534 | Dhps          | Dhps          | DHPS     | 52.49466509 | 40.13936006 | 34.33331237 | 39.33965441 | 38.52210878 | 42.12929152 | 67.69219698 | 35.71562789 | 29.69895163 | 41.37222453 |
| ENSMUSG00000040466  | -0.170834988 | 5.049885665  | 0.570901691 | 0.449900831 | 0.999071534 | Blvrb         | Blvrb         | BLVRB    | 39.23063875 | 41.79948131 | 32.58298665 | 32.54020797 | 35.51359095 | 24.52084843 | 35.14040436 | 33.0904947  | 24.27771443 | 31.37230296 |
| ENSMUSG00000021037  | 0.186893718  | 7.133536581  | 0.570811998 | 0.44993643  | 0.999071534 | Ahsa1         | Ahsa1         | AHSA1    | 135.4474647 | 103.8168678 | 150.8646138 | 127.7324582 | 163.8334168 | 163.1327661 | 192.3338522 | 105.0053276 | 122.09569   | 140.5871326 |
| ENSMUSG000000303059 | -0.22983015  | 5.252137019  | 0.570718344 | 0.449973607 | 0.999071534 | Pygb          | Pygb          | PYGB     | 55.93348673 | 55.43619152 | 28.27449254 | 32.19329744 | 42.18465223 | 78.21932364 | 33.32837614 | 21.00106553 | 17.36367278 | 29.60761092 |
| ENSMUSG00000024566  | -0.159025698 | 5.313586011  | 0.570349706 | 0.450119986 | 0.999071534 | Atp9b         | Atp9b         | ATP9B    | 49.19620351 | 52.4716893  | 44.63330609 | 35.59302066 | 35.64439607 | 47.51369147 | 35.20511965 | 33.29774205 | 27.97044121 | 38.88858388 |
| ENSMUSG00000026361  | 0.168563681  | 5.432302176  | 0.569937869 | 0.450283606 | 0.999071534 | Cdc73         | Cdc73         | CDC73    | 32.4231755  | 53.83536032 | 35.47775612 | 35.87054909 | 53.36849026 | 51.51561036 | 46.07728896 | 44.76542915 | 39.04862158 | 38.56178906 |
| ENSMUSG00000035268  | -0.211075536 | 5.056104076  | 0.569930582 | 0.450286503 | 0.999071534 | Pkig          | Pkig          | PKIG     | 56.2843869  | 29.17070185 | 32.85226753 | 35.31549223 | 31.26242444 | 43.80282124 | 44.78298309 | 17.96143762 | 16.1065743  | 30.32655953 |
| ENSMUSG00000029578  | -0.150422518 | 6.010089399  | 0.569907588 | 0.450295641 | 0.999071534 | Wipi2         | Wipi2         | WIP12    | 82.81243958 | 70.73302298 | 65.30061373 | 60.70934323 | 72.59684337 | 70.43377235 | 64.00342525 | 52.64082872 | 49.65539002 | 58.75770909 |
| ENSMUSG00000026395  | -0.185734586 | 6.10145666   | 0.569748812 | 0.450358749 | 0.999071534 | Ptprc         | Ptprc         | PTPRC    | 94.74304528 | 104.6469284 | 57.62610861 | 57.65653054 | 65.66417184 | 98.88377751 | 75.26388632 | 49.25578856 | 45.64838861 | 48.30027477 |
| ENSMUSG00000053841  | -0.198378111 | 5.23813019   | 0.569039388 | 0.450640891 | 0.999071534 | Txlna         | Txlna         | TXLNA    | 47.79260284 | 48.26209615 | 38.97840758 | 33.65032168 | 40.68039331 | 73.19873449 | 32.29239145 | 26.52766172 | 18.85647722 | 27.45076509 |
| ENSMUSG00000020720  | 0.180854483  | 7.086773219  | 0.569034404 | 0.450642874 | 0.999071534 | Psmid12       | Psmid12       | PSMD12   | 117.4813761 | 112.5917943 | 159.5489222 | 130.0220677 | 140.4847023 | 129.9532205 | 161.852949  | 123.1740126 | 126.5741034 | 148.8223622 |

|                     |              |              |             |             |             |               |               |         |              |             |             |             |             |             |             |             |             |             |
|---------------------|--------------|--------------|-------------|-------------|-------------|---------------|---------------|---------|--------------|-------------|-------------|-------------|-------------|-------------|-------------|-------------|-------------|-------------|
| ENSMUSG00000063234  | 0.554239547  | 0.253493473  | 0.568739956 | 0.450760059 | 0.999071534 | Gpr84         | Gpr84         | GPR84   | 0.98252047   | 0.711480533 | 1.615685288 | 0.346910533 | 0.784830739 | 4.001918884 | 0.841298815 | 0.552659619 | 0.31427462  | 0.980384468 |
| ENSMUSG00000033909  | 0.189558238  | 4.857096379  | 0.568722187 | 0.450767132 | 0.999071534 | Usp36         | Usp36         | USP36   | 26.59823271  | 23.83459785 | 39.71893    | 25.25508678 | 24.39515548 | 41.83824288 | 19.47930334 | 27.08032134 | 27.26332332 | 33.85594361 |
| ENSMUSG00000072980  | 0.404244885  | 3.047761828  | 0.568695084 | 0.450777922 | 0.999071534 | Oip5          | Oip5          | OIP5    | 13.82546661  | 4.861783641 | 5.385617627 | 5.273040098 | 7.259684337 | 13.02442691 | 23.68579741 | 3.868617334 | 3.614158135 | 2.352927222 |
| ENSMUSG00000055839  | 0.224624059  | 7.959800497  | 0.568374683 | 0.450905498 | 0.999071534 | Tceb2         | Tceb2         | TCEB2   | 203.2413771  | 165.1820637 | 306.2396823 | 258.5871111 | 254.350562  | 168.2988796 | 253.4250893 | 272.5302747 | 275.3831361 | 287.3833669 |
| ENSMUSG00000024319  | 0.169107602  | 5.280454891  | 0.568061002 | 0.451030453 | 0.999071534 | Vps52         | Vps52         | VP52    | 41.40621979  | 38.89426913 | 35.61239656 | 33.23402904 | 40.54958819 | 48.82341038 | 25.17424916 | 43.17653275 | 34.33450228 | 46.86237755 |
| ENSMUSG00000030144  | -0.303308307 | 4.570021218  | 0.567526987 | 0.451243303 | 0.999071534 | Clec4d        | Clec4d        | CLEC4D  | 41.47639982  | 47.78777579 | 15.34901024 | 14.43147816 | 17.59328907 | 12.95166475 | 38.31145374 | 25.14601267 | 8.878258026 | 16.99333077 |
| ENSMUSG00000044548  | 0.82945639   | -0.377565219 | 0.567279877 | 0.45134185  | 0.999071534 | Dact1         | Dact1         | DACT1   | 0.421080201  | 0.711480533 | 1.211763966 | 0           | 0           | 1.382481069 | 1.035444696 | 0.414494714 | 0           | 1.30717929  |
| ENSMUSG00000029175  | -0.154013753 | 5.259507583  | 0.567068105 | 0.451426331 | 0.999071534 | Slc35f6       | Slc35f6       | SLC35F6 | 39.93243909  | 48.14351606 | 36.4202392  | 40.44976812 | 43.88511883 | 42.78415098 | 38.95860667 | 34.47214374 | 26.47763677 | 33.26771293 |
| ENSMUSG000000091845 | 0.266382846  | 4.586572969  | 0.56668696  | 0.451578442 | 0.999071534 | Gm4604        | Gm4604        |         | 28.00183338  | 11.97658897 | 26.18756571 | 28.30789947 | 17.52788651 | 13.38823772 | 19.93231039 | 24.45518815 | 37.32011117 | 24.18281687 |
| ENSMUSG00000032047  | 0.191321588  | 5.117089798  | 0.566671211 | 0.451584729 | 0.999071534 | Acat1         | Acat1         | ACAT1   | 39.86225905  | 31.00869322 | 33.72743039 | 31.49947637 | 31.65483981 | 48.09578877 | 58.11433354 | 24.10977589 | 24.43485174 | 26.73181648 |
| ENSMUSG00000024146  | 0.181255449  | 6.272857219  | 0.566636378 | 0.451598635 | 0.999071534 | Cript         | Cript         | CRIPT   | 100.7083481  | 69.90296236 | 63.95420932 | 73.82256137 | 67.49544357 | 67.45052373 | 117.3935424 | 68.04621561 | 63.01206139 | 77.90788569 |
| ENSMUSG00000042828  | 0.677584443  | -0.151763927 | 0.566474212 | 0.451663382 | 0.999071534 | Trim72        | Trim72        | TRIM72  | 0.98252047   | 0.415030311 | 0.471241542 | 0.416292639 | 0.850233301 | 0           | 0.19414588  | 1.174401691 | 1.492804447 | 1.437897219 |
| ENSMUSG00000022805  | 0.512374932  | 0.573051714  | 0.566390478 | 0.45169682  | 0.999071534 | Maats1        | Maats1        | MAATS1  | 1.614140771  | 1.660121243 | 0.673202203 | 0.555056852 | 1.373453794 | 0.582097292 | 0.388291761 | 2.625133191 | 1.885647722 | 1.895409971 |
| ENSMUSG00000011958  | 0.189465644  | 7.265049014  | 0.566282182 | 0.451740072 | 0.999071534 | Bnip2         | Bnip2         | BNIP2   | 162.1158775  | 149.2923318 | 131.2744297 | 147.8532691 | 155.2656812 | 176.0844309 | 242.2940588 | 126.4208879 | 111.0175097 | 142.2211068 |
| ENSMUSG00000019854  | 0.153934801  | 5.549918895  | 0.566253761 | 0.451751424 | 0.999071534 | Reps1         | Reps1         | REPS1   | 46.88026241  | 45.94978442 | 48.20127776 | 33.37279325 | 56.24620297 | 57.19105896 | 44.13583015 | 46.49249046 | 38.26293503 | 52.74468436 |
| ENSMUSG00000020547  | 0.174326476  | 5.69402776   | 0.565810056 | 0.451928709 | 0.999071534 | Bzw2          | Bzw2          | BZW2    | 55.58258657  | 41.50303108 | 61.73264205 | 41.90679236 | 51.66802366 | 76.32750744 | 68.59821109 | 32.67599998 | 37.94866041 | 54.5093764  |
| ENSMUSG00000024070  | 0.191510755  | 6.530209474  | 0.565150531 | 0.452192427 | 0.999071534 | Prkd3         | Prkd3         | PRKD3   | 76.63659663  | 75.77267675 | 102.4613754 | 93.87399016 | 97.71142702 | 85.20449114 | 58.30847942 | 122.1377758 | 93.33956226 | 107.6462145 |
| ENSMUSG000000004535 | -0.165147347 | 6.670851709  | 0.565078506 | 0.452221242 | 0.999071534 | Tax1bp1       | Tax1bp1       | TAX1BP1 | 113.5512943  | 118.1650585 | 108.6548356 | 117.9495811 | 99.15028338 | 122.53148   | 114.8049306 | 69.08245239 | 74.32594772 | 87.97316622 |
| ENSMUSG00000021294  | -0.537794727 | 0.656271562  | 0.564926569 | 0.452282036 | 0.999071534 | Klf26a        | Klf26a        | KIF26A  | 1.403600671  | 3.260952442 | 2.288887492 | 0.346910533 | 1.569661478 | 2.473913492 | 1.29430587  | 0.552659619 | 0.078568655 | 1.633974113 |
| ENSMUSG00000034525  | 0.18100143   | 5.237011136  | 0.564903949 | 0.452291087 | 0.999071534 | Bc018507      | Ice1          | ICE1    | 36.84451761  | 48.91428664 | 30.96730136 | 28.51604579 | 38.3259011  | 57.84591841 | 28.08643737 | 49.67028327 | 26.87048004 | 34.05202051 |
| ENSMUSG00000056737  | -0.188531366 | 8.648121065  | 0.564886924 | 0.452297901 | 0.999071534 | Capg          | Capg          | CAPG    | 525.9291714  | 411.1171679 | 414.8271977 | 420.3168015 | 448.0075469 | 425.2220719 | 423.5615958 | 306.2425115 | 257.0766395 | 416.5326808 |
| ENSMUSG00000052214  | 0.187932045  | 5.050576036  | 0.564758921 | 0.45234913  | 0.999071534 | Opa3          | Opa3          | OPA3    | 32.91443573  | 30.06005251 | 32.51566643 | 32.95650061 | 31.52403469 | 41.40166991 | 22.7797833  | 28.04747567 | 44.15558417 | 30.32655953 |
| ENSMUSG00000078919  | -0.199729345 | 4.448205221  | 0.564664741 | 0.452386829 | 0.999071534 | Dpm1          | Dpm1          | DPM1    | 27.15967298  | 19.92145492 | 17.30129663 | 31.7770048  | 23.6757273  | 19.2819728  | 17.27898336 | 17.408778   | 19.09218319 | 23.39850929 |
| ENSMUSG00000051367  | 0.266020194  | 3.849236411  | 0.564566117 | 0.452426313 | 0.999071534 | Slx1          | Slx1          | SIX1    | 8.7772504193 | 7.470545595 | 14.8777687  | 15.19468133 | 20.86341715 | 16.80805931 | 8.348272859 | 15.33630443 | 18.93504588 | 14.31361323 |
| ENSMUSG00000074361  | -0.321781076 | 2.103863804  | 0.564367959 | 0.452505659 | 0.999071534 | Csar2         | Csar2         | C5AR2   | 5.965302851  | 7.055515284 | 3.971893    | 2.844666369 | 4.316569065 | 5.020589145 | 4.853647011 | 2.625133191 | 3.142746204 | 2.418281687 |
| ENSMUSG00000052031  | 0.208609607  | 4.268438665  | 0.564275378 | 0.452542739 | 0.999071534 | Tagap1        | Tagap1        |         | 22.94887097  | 16.4233423  | 19.79214478 | 14.36209606 | 18.96674286 | 18.48158903 | 12.81362811 | 26.18224946 | 19.17075184 | 20.91486864 |
| ENSMUSG00000036599  | -0.159052147 | 5.46979017   | 0.564149499 | 0.452593161 | 0.999071534 | Chst12        | Chst12        | CHST12  | 40.98513959  | 47.72848575 | 48.20127776 | 47.94303563 | 57.16183883 | 51.07903739 | 46.27143484 | 41.31130653 | 24.59198905 | 41.76437832 |
| ENSMUSG00000048720  | 0.228374009  | 4.329180894  | 0.563987006 | 0.452658263 | 0.999071534 | Tbc1d12       | Tbc1d12       | TBC1D12 | 12.3516859   | 16.71979252 | 19.38822346 | 24.76941204 | 21.64824789 | 17.24463228 | 12.8783434  | 24.04069343 | 23.9634398  | 23.07171447 |
| ENSMUSG00000001576  | -0.178144765 | 7.056258802  | 0.563962172 | 0.452668214 | 0.999071534 | Ergic1        | Ergic1        | ERGIC1  | 110.5335528  | 156.5850073 | 146.354159  | 133.0748804 | 187.2475338 | 161.3137121 | 125.2888082 | 133.8817927 | 83.2827744  | 107.7769325 |
| ENSMUSG000000081751 | 0.540013584  | 1.711869694  | 0.56395861  | 0.452669641 | 0.999071534 | Gm14251       | Gm14251       |         | 2.947561409  | 4.209593153 | 3.029409915 | 1.873316877 | 1.24264867  | 0.436572969 | 0.647152935 | 4.490359406 | 1.099961171 | 11.045665   |
| ENSMUSG00000037287  | 0.230728229  | 4.061949484  | 0.563792326 | 0.452736279 | 0.999071534 | Tbcel         | Tbcel         | TBCEL   | 11.5095255   | 13.99245048 | 19.38822346 | 16.30479504 | 17.78949675 | 17.9722539  | 9.772009315 | 26.32041436 | 13.1209654  | 18.95409971 |
| ENSMUSG00000038844  | 0.212210582  | 3.797389635  | 0.563598778 | 0.452813864 | 0.999071534 | Klf16b        | Klf16b        | KIF16B  | 11.22880537  | 17.78701332 | 11.64639812 | 11.6561939  | 13.99614818 | 18.62711335 | 10.9368846  | 13.81649048 | 13.19953406 | 15.03256184 |
| ENSMUSG00000031969  | 0.191453065  | 4.075863501  | 0.563426129 | 0.452883087 | 0.999071534 | Acad8         | Acad8         | ACAD8   | 18.457344882 | 14.34819075 | 17.03201575 | 15.8885024  | 15.36960198 | 23.57494033 | 16.69654572 | 13.0565835  | 14.6923385  | 19.01945867 |
| ENSMUSG00000022306  | 0.18550974   | 4.19867169   | 0.562861219 | 0.453109706 | 0.999071534 | Zfpm2         | Zfpm2         | ZFPM2   | 16.56248792  | 15.8897319  | 17.43593707 | 18.87193298 | 19.68617104 | 21.68312413 | 16.24353866 | 20.310241   | 14.45663254 | 21.37238139 |
| ENSMUSG000000091474 | 0.252832033  | 3.440024787  | 0.562815792 | 0.453127937 | 0.999071534 | 2610021A01Rik | 2610021A01Rik |         | 9.263764428  | 8.47847635  | 8.616988204 | 12.90507182 | 11.31464316 | 14.84348095 | 15.20809397 | 11.05319238 | 9.821081887 | 5.751588876 |
| ENSMUSG00000017843  | -0.18249077  | 6.242272099  | 0.562315704 | 0.453328712 | 0.999071534 | Ppp2r5c       | Ppp2r5c       | PPP2R5C | 94.67286525  | 102.808937  | 61.19408029 | 74.51638243 | 85.02333007 | 114.6731666 | 88.01279913 | 56.57852851 | 40.777132   | 53.72506882 |
| ENSMUSG00000089857  | 0.476738059  | 1.153279548  | 0.562059771 | 0.453431518 | 0.999071534 | Zfp882        | Zfp882        |         | 2.666841275  | 1.956571465 | 0.875162864 | 0.971349492 | 2.746907587 | 2.546675653 | 1.876743511 | 0.27632981  | 4.085570065 | 2.61435858  |
| ENSMUSG00000080877  | -0.660459293 | -0.250066678 | 0.562052217 | 0.453434553 | 0.999071534 | Rpl22-ps1     | Rpl22-ps1     |         | 0.421080201  | 0.474320355 | 0.605881983 | 1.318260024 | 1.63506404  | 0.582097292 | 1.100159989 | 0.828989429 | 0.15713731  | 0           |
| ENSMUSG00000031451  | 0.340518269  | 4.148297868  | 0.561814455 | 0.453530093 | 0.999071534 | Gas6          | Gas6          | GA56    | 14.52726694  | 22.76737705 | 11.2424768  | 14.63962448 | 17.59328907 | 44.53044285 | 37.27600904 | 6.977327692 | 6.914041649 | 6.405178521 |

|                      |              |              |             |             |             |               |               |          |             |             |             |             |             |             |             |             |             |             |
|----------------------|--------------|--------------|-------------|-------------|-------------|---------------|---------------|----------|-------------|-------------|-------------|-------------|-------------|-------------|-------------|-------------|-------------|-------------|
| ENSMUSG00000003134   | -0.319851078 | 2.258931079  | 0.561653953 | 0.453594606 | 0.999071534 | Tbc1d8        | Tbc1d8        | TBC1D8   | 5.474042616 | 6.106874574 | 4.981696305 | 4.787365352 | 5.493815174 | 6.839643183 | 1.941458804 | 2.417885834 | 3.142746204 | 6.143742663 |
| ENSMUSG000000040242  | 0.159499724  | 6.105805142  | 0.561455404 | 0.453674432 | 0.999071534 | Fgfr1op2      | Fgfr1op2      | FGFR1OP2 | 75.79443623 | 55.73264174 | 68.93590563 | 66.88435071 | 69.78453322 | 80.54771281 | 91.57214027 | 58.09834246 | 55.86231377 | 65.94719519 |
| ENSMUSG000000028630  | -0.247624598 | 3.843601464  | 0.561440412 | 0.45368046  | 0.999071534 | Dyrk2         | Dyrk2         | DYRK2    | 16.70284798 | 24.66465847 | 18.31109993 | 8.325852786 | 12.62269439 | 18.48158903 | 12.16647517 | 16.57978857 | 8.721120716 | 7.97379367  |
| ENSMUSG000000051306  | 0.192374481  | 4.093257533  | 0.561220264 | 0.453768997 | 0.999071534 | Usp42         | Usp42         | USP42    | 14.87816711 | 18.67636399 | 16.35881354 | 12.90507182 | 19.48996336 | 22.77455656 | 14.23736457 | 16.44162367 | 16.26371161 | 17.77763835 |
| ENSMUSG000000019986  | 0.182896954  | 4.624587147  | 0.56100061  | 0.453857362 | 0.999071534 | Ahl1          | Ahl1          | AHL1     | 22.31725067 | 25.25755892 | 25.31240285 | 24.63064782 | 21.51744277 | 26.92199976 | 19.15572687 | 26.52766172 | 27.49902928 | 24.05209894 |
| ENSMUSG000000041957  | 0.211807301  | 5.802230887  | 0.560834347 | 0.453924267 | 0.999071534 | Pkp2          | Pkp2          | PKP2     | 32.49335553 | 67.88710085 | 67.32022034 | 38.99274388 | 61.80542071 | 55.88134005 | 46.33615013 | 94.22846507 | 48.4768602  | 40.65327592 |
| ENSMUSG000000097390  | 0.668955144  | -0.012629317 | 0.560766413 | 0.453951608 | 0.999071534 | Gm26785       | Gm26785       |          | 1.263240604 | 0.355740266 | 1.413724627 | 0.138764213 | 0.39241537  | 0.218286485 | 0.258861174 | 1.036236786 | 2.592765618 | 0.588230681 |
| ENSMUSG000000029504  | 0.205122602  | 4.393466698  | 0.560736515 | 0.453963642 | 0.999071534 | Ddx51         | Ddx51         | DDX51    | 29.40543405 | 19.32855448 | 20.06142566 | 14.70900659 | 17.72409419 | 33.97992943 | 28.08643737 | 14.43823255 | 13.98522061 | 20.65343278 |
| ENSMUSG000000032724  | -0.238115673 | 3.247212617  | 0.560677231 | 0.453987504 | 0.999071534 | Abtb2         | Abtb2         | ABTB2    | 10.456825   | 12.21374915 | 10.9058757  | 8.187088573 | 10.98763035 | 13.53376204 | 6.730390522 | 8.842553906 | 5.971217787 | 7.385562989 |
| ENSMUSG000000027206  | 0.193626905  | 7.541070098  | 0.560566112 | 0.454032237 | 0.999071534 | Cops2         | Cops2         | COPS2    | 160.9228169 | 213.3255798 | 154.0959844 | 168.7372831 | 205.4948485 | 172.519085  | 195.6990475 | 259.2664438 | 148.9661701 | 175.4234607 |
| ENSMUSG000000024083  | -0.163459037 | 5.885005082  | 0.560334776 | 0.454125388 | 0.999071534 | Pja2          | Pja2          | PIA2     | 58.60032801 | 84.07328297 | 52.57709209 | 54.88124628 | 74.23190741 | 84.54963169 | 54.29613123 | 51.67367439 | 41.09140662 | 42.67940382 |
| ENSMUSG000000046351  | 0.203508222  | 4.042816996  | 0.560251485 | 0.454158933 | 0.999071534 | Zfp322a       | Zfp322a       | ZNF322   | 15.15888725 | 17.07553279 | 13.73332495 | 15.40282765 | 17.59328907 | 17.24463228 | 21.29133155 | 15.54355179 | 9.663944577 | 21.63381725 |
| ENSMUSG000000057181  | 0.179903411  | 4.47974874   | 0.559867226 | 0.454313744 | 0.999071534 | 5730455P16Rik | 5730455P16Rik | C17orf75 | 19.08896912 | 20.92938568 | 24.43723998 | 21.92474567 | 21.38663764 | 26.19437815 | 17.53784453 | 25.00784777 | 21.60638015 | 22.87563758 |
| ENSMUSG000000083899  | -0.43230946  | 1.652173941  | 0.559731563 | 0.45436842  | 0.999071534 | Gm12346       | Gm12346       |          | 3.228281543 | 2.430891821 | 3.164050356 | 5.758714844 | 3.204725518 | 3.638108076 | 1.812028217 | 0.345412262 | 4.242077375 | 2.091486864 |
| ENSMUSG0000000021356 | -0.973826261 | -0.990983172 | 0.559670546 | 0.454393015 | 0.999071534 | Irf4          | Irf4          | IRF4     | 0.631620302 | 0.474320355 | 1.077123525 | 0           | 0.327012808 | 1.164194584 | 0.19414588  | 0           | 0           | 0           |
| ENSMUSG000000039307  | -0.228764417 | 4.085420921  | 0.55908261  | 0.454630109 | 0.999071534 | Hexdc         | Hexdc         | HEXDC    | 20.28202969 | 13.45884008 | 16.69541464 | 24.70002993 | 18.70513262 | 12.22404314 | 9.772009315 | 15.61263424 | 16.49941757 | 18.95409971 |
| ENSMUSG000000097216  | 0.648113442  | -0.339252248 | 0.559041555 | 0.454646672 | 0.999071534 | 4932441J04Rik | 4932441J04Rik |          | 0.140360067 | 0.948640711 | 1.077123525 | 0.138764213 | 0.327012808 | 0.9459081   | 0.517722348 | 1.381649048 | 0.078568655 | 1.045743432 |
| ENSMUSG0000000024601 | 0.361929437  | 3.663881963  | 0.558946432 | 0.454685053 | 0.999071534 | Isoc1         | Isoc1         | ISOC1    | 21.7558104  | 13.39955004 | 6.866662475 | 5.689332737 | 9.875786801 | 32.37916188 | 23.49165153 | 3.799534882 | 6.049786443 | 7.320204025 |
| ENSMUSG0000000035769 | 0.348593011  | 1.725486547  | 0.55880162  | 0.454743491 | 0.999071534 | Xylb          | Xylb          | XYLB     | 4.140621979 | 2.490181865 | 2.086926831 | 2.497755836 | 3.335530641 | 6.257545891 | 2.78275762  | 2.970545453 | 1.414235792 | 4.509768551 |
| ENSMUSG000000083061  | 0.23388029   | 8.867442797  | 0.558775104 | 0.454754193 | 0.999071534 | Gm12191       | Gm12191       |          | 364.8659944 | 360.7206302 | 607.2283875 | 282.3851737 | 624.5944632 | 309.6029973 | 592.727373  | 505.8217164 | 418.4566571 | 564.3746585 |
| ENSMUSG000000069515  | 0.521441957  | 1.653452715  | 0.558437815 | 0.454890356 | 0.999071534 | Lyz1          | Lyz1          | LYZ      | 5.333682549 | 2.490181865 | 0.807842644 | 2.636520049 | 1.569661478 | 4.584016176 | 10.41916225 | 1.381649048 | 0.392843275 | 1.176461361 |
| ENSMUSG000000022853  | -0.736324271 | 0.050044372  | 0.557795394 | 0.455149878 | 0.999071534 | Ehhadh        | Ehhadh        | EHHADH   | 0.98252047  | 1.541541155 | 1.683005509 | 0           | 1.63506404  | 1.673529715 | 0.647152935 | 0.069082452 | 0           | 1.111102397 |
| ENSMUSG000000001687  | -0.165712777 | 6.084132664  | 0.557628015 | 0.455217533 | 0.999071534 | Ubl3          | Ubl3          | UBL3     | 83.79496005 | 58.40069374 | 79.43786    | 82.77285311 | 66.2527949  | 74.72673988 | 81.67070037 | 53.74614796 | 48.08401692 | 52.41788953 |
| ENSMUSG000000094191  | 0.819152578  | 0.023737453  | 0.557068539 | 0.45544379  | 0.999071534 | Rpb1-ps14     | Rpb1-ps14     |          | 0           | 2.371601776 | 0.403921322 | 0.138764213 | 0.457817931 | 0           | 0.841298815 | 2.348803381 | 1.649941757 | 0.261435858 |
| ENSMUSG000000027746  | 0.171860152  | 6.43434511   | 0.556902231 | 0.455511081 | 0.999071534 | Ufm1          | Ufm1          | UFM1     | 102.8137491 | 75.47622653 | 76.27380965 | 90.33550273 | 76.19398426 | 90.15231813 | 121.4706059 | 67.21722618 | 77.23289796 | 84.37842318 |
| ENSMUSG000000071669  | 0.472468009  | 0.901210208  | 0.556752896 | 0.455571517 | 0.999071534 | Snx29         | Snx29         | SNX29    | 1.473780704 | 4.091013064 | 0.471241542 | 0.624438959 | 0.915635862 | 2.328389169 | 2.588611739 | 2.210638477 | 1.492804447 | 1.176461361 |
| ENSMUSG000000022678  | 0.166736354  | 5.814136437  | 0.556671186 | 0.45560459  | 0.999071534 | Nde1          | Nde1          | NDE1     | 65.47797129 | 44.58611339 | 48.94180019 | 55.15877471 | 60.6281746  | 91.09822623 | 68.98650285 | 39.86057503 | 42.11279913 | 51.89501782 |
| ENSMUSG000000031748  | -0.410886608 | 1.702906987  | 0.556586451 | 0.455638892 | 0.999071534 | Gnao1         | Gnao1         | GNAO1    | 0.98252047  | 5.51397413  | 3.769932339 | 5.689332737 | 2.289089656 | 4.80230266  | 1.294305087 | 3.523205072 | 1.964216377 | 1.699333077 |
| ENSMUSG000000038388  | -0.168645331 | 6.004815279  | 0.55639146  | 0.455717843 | 0.999071534 | Mpp6          | Mpp6          | MPP6     | 68.35535267 | 95.81271176 | 67.72414166 | 55.29753892 | 65.92578209 | 76.25474528 | 69.89251696 | 66.59548411 | 38.18436638 | 45.03232654 |
| ENSMUSG000000026563  | 0.18735276   | 5.453070499  | 0.555919211 | 0.455909143 | 0.999071534 | Tada1         | Tada1         | TADA1    | 59.16176828 | 38.1827886  | 38.23788515 | 33.78908589 | 43.62350858 | 59.30116164 | 68.85707226 | 34.47214374 | 24.12057712 | 43.4637114  |
| ENSMUSG000000021259  | 0.404639628  | 2.915511994  | 0.555827369 | 0.455946362 | 0.999071534 | Cyp46a1       | Cyp46a1       | CYP46A1  | 4.702062247 | 2.668051998 | 10.70391503 | 7.701413827 | 7.194281776 | 2.473913492 | 2.135604685 | 13.12566595 | 8.878258026 | 12.28748533 |
| ENSMUSG000000020659  | 0.22145587   | 3.712257491  | 0.555375826 | 0.456129416 | 0.999071534 | Cbl1          | Cbl1          | CBLL1    | 7.649623656 | 15.17825137 | 11.71371834 | 12.90507182 | 14.6501738  | 20.08235658 | 11.97232929 | 10.63869767 | 11.23531768 | 14.57504908 |
| ENSMUSG000000027615  | 0.170819925  | 4.486548742  | 0.555323666 | 0.456150569 | 0.999071534 | Hps3          | Hps3          | HP53     | 21.47509026 | 20.04003501 | 23.09083558 | 20.81463196 | 23.47951961 | 30.63287    | 25.17424916 | 19.41216912 | 16.18514295 | 24.37889376 |
| ENSMUSG000000043903  | -0.296537407 | 3.477146162  | 0.555000143 | 0.456281805 | 0.999071534 | Gm22          | Gm22          |          | 4.842422314 | 12.33232924 | 19.859465   | 9.85225913  | 16.08903015 | 16.00767553 | 5.047792891 | 9.187966168 | 5.892649132 | 13.00643394 |
| ENSMUSG000000037375  | 0.208950198  | 3.943007828  | 0.5549129   | 0.456317205 | 0.999071534 | Hhat          | Hhat          | HHAT     | 18.80824899 | 17.07553279 | 12.45424076 | 11.58681179 | 13.7999405  | 23.64770249 | 16.63183042 | 17.75419027 | 11.39245499 | 11.045665   |
| ENSMUSG000000022336  | 0.214804897  | 8.809876764  | 0.554899371 | 0.456322695 | 0.999071534 | Elf3e         | Elf3e         | EIF3E    | 425.2208232 | 356.2145868 | 483.9461403 | 542.0823985 | 386.9215544 | 357.5532617 | 496.1721551 | 444.4764987 | 549.5877424 | 409.8007074 |
| ENSMUSG000000039929  | 0.323902652  | 2.61840858   | 0.554874568 | 0.45633276  | 0.999071534 | Urb1          | Urb1          | URB1     | 7.228543455 | 4.328173242 | 8.145746661 | 3.885397967 | 4.185763942 | 14.26138366 | 6.730390522 | 4.214029596 | 2.278490998 | 6.862691273 |
| ENSMUSG000000021395  | -0.151085393 | 6.233273241  | 0.554873838 | 0.456333057 | 0.999071534 | Spin1         | Spin1         | SPIN1    | 78.81217767 | 90.35802768 | 85.56400005 | 82.6340889  | 72.33523313 | 88.84259922 | 63.35627232 | 71.84575049 | 53.1909799  | 69.67265616 |
| ENSMUSG000000090935  | 0.195848346  | 5.266078352  | 0.55473828  | 0.456388073 | 0.999071534 | Synj2bp       | Synj2bp       | SYNJ2BP  | 30.66867466 | 36.34479722 | 43.62350278 | 36.98066279 | 37.60647292 | 39.29156722 | 33.7813832  | 28.8764651  | 56.25515705 | 33.26771293 |

|                     |              |              |             |             |             |               |               |            |             |             |             |             |             |             |             |             |             |             |
|---------------------|--------------|--------------|-------------|-------------|-------------|---------------|---------------|------------|-------------|-------------|-------------|-------------|-------------|-------------|-------------|-------------|-------------|-------------|
| ENSMUSG00000070873  | -0.545280493 | 0.614311165  | 0.554248956 | 0.456586751 | 0.999071534 | Llra5         | Llra5         | LILRA4     | 0.98252047  | 2.845922132 | 1.615685288 | 1.942698983 | 1.177246109 | 1.528005392 | 1.29430587  | 0.828989429 | 1.728510412 | 0           |
| ENSMUSG00000053318  | -0.415775824 | 1.502624702  | 0.554060224 | 0.456663418 | 0.999071534 | Slamf8        | Slamf8        | SLAMF8     | 5.54422265  | 4.209593153 | 1.346404407 | 2.914048475 | 2.027479409 | 4.220205368 | 1.359021163 | 2.072473572 | 0.549980586 | 3.529384083 |
| ENSMUSG00000071456  | 0.6023713    | 1.611355474  | 0.553994841 | 0.456689983 | 0.999071534 | 1110002L01Rik | 1110002L01Rik |            | 4.210802013 | 2.075151554 | 3.971893    | 0.485674746 | 1.373453794 | 4.074681045 | 12.10175988 | 0.345412262 | 0.235705965 | 1.045743432 |
| ENSMUSG00000028331  | 0.374641075  | 1.871204101  | 0.553529536 | 0.456879103 | 0.999071534 | 5830415F09Rik | Trmo          | TRMO       | 6.246022985 | 1.660121243 | 3.298690797 | 1.318260024 | 3.597140888 | 6.039259406 | 4.012348196 | 4.283112048 | 1.414235792 | 4.182973728 |
| ENSMUSG00000021368  | -0.223646411 | 3.566389317  | 0.553102409 | 0.457052815 | 0.999071534 | Tbc1d7        | Tbc1d7        | TBC1D7     | 13.26402634 | 13.34025999 | 10.29999371 | 11.79495811 | 17.00466601 | 11.49642152 | 11.45460695 | 11.39860464 | 5.892649132 | 12.54892118 |
| ENSMUSG00000038811  | -0.183179726 | 4.516652559  | 0.553034739 | 0.457080346 | 0.999071534 | Gngt2         | Gngt2         | GNGT2      | 28.84399379 | 21.10725581 | 29.28429585 | 25.32446889 | 20.86341715 | 20.59169171 | 19.34987275 | 24.17885834 | 17.83508471 | 20.261279   |
| ENSMUSG00000003360  | -0.173443907 | 6.654487259  | 0.552588591 | 0.457261922 | 0.999071534 | Ddx23         | Ddx23         | DDX23      | 117.9726364 | 126.821405  | 94.71955002 | 91.58438064 | 124.5264773 | 159.8584689 | 88.59523677 | 87.9419619  | 53.26954816 | 83.7901925  |
| ENSMUSG00000060176  | 0.73699825   | 0.06473354   | 0.552437563 | 0.457323414 | 0.999071534 | Klf27         | Klf27         | KIF27      | 0.350900168 | 1.245090933 | 0.134640441 | 0           | 1.831271725 | 2.182864846 | 0.906014109 | 1.105319238 | 0           | 1.633974113 |
| ENSMUSG00000032415  | 0.254850299  | 3.180035816  | 0.552353261 | 0.457357744 | 0.999071534 | Ube2cbp       | Ube2cbp       | UBE3D      | 9.544484562 | 5.098943819 | 10.9058757  | 7.978942253 | 8.763943254 | 13.97033501 | 11.26046107 | 6.424668073 | 7.228316269 | 8.954178137 |
| ENSMUSG00000025010  | 0.353113491  | 1.775660998  | 0.552273746 | 0.457390128 | 0.999071534 | Ccnj          | Ccnj          | CCNJ       | 4.338821644 | 2.905212176 | 3.567971678 | 1.526406344 | 3.662543449 | 6.69411886  | 4.659501131 | 2.625133191 | 1.335667137 | 3.398666154 |
| ENSMUSG00000039542  | 0.274086652  | 6.287761477  | 0.552155929 | 0.457438118 | 0.999071534 | Ncam1         | Ncam1         | NCAM1      | 43.58180083 | 67.11633027 | 94.18098826 | 90.26612062 | 68.93429992 | 46.85883202 | 28.34529854 | 112.0517378 | 109.4461366 | 95.48944714 |
| ENSMUSG00000022514  | 0.170788645  | 6.055565022  | 0.552136997 | 0.457445831 | 0.999071534 | Il1rap        | Il1rap        | IL1RAP     | 50.17872398 | 78.79646902 | 75.8025681  | 52.45287255 | 67.49544357 | 88.98812354 | 83.02972153 | 58.37467227 | 61.99066887 | 48.82314649 |
| ENSMUSG00000036504  | -0.175778244 | 5.58363615   | 0.552096508 | 0.457462325 | 0.999071534 | Phpt1         | Phpt1         | PHPT1      | 68.35535267 | 36.40408727 | 59.71303544 | 57.65653054 | 40.54958819 | 46.7133077  | 55.78458298 | 34.6793911  | 36.06301269 | 43.79050622 |
| ENSMUSG00000006235  | -0.818071407 | -0.701554481 | 0.551617063 | 0.457657715 | 0.999071534 | Epor          | Epor          | EPOR       | 0           | 1.007930755 | 1.750325729 | 0.138764213 | 0.261610246 | 0.800383777 | 0.258861174 | 0           | 0.392843275 | 0.261435858 |
| ENSMUSG00000039070  | 0.302704087  | 2.266821203  | 0.551541708 | 0.457688436 | 0.999071534 | Cpa4          | Cpa4          | CPA4       | 3.158101509 | 4.209593153 | 5.183656966 | 5.82809695  | 3.204725518 | 6.330308052 | 7.183397576 | 4.62852431  | 3.221314859 | 3.986896835 |
| ENSMUSG00000025217  | -0.205740137 | 4.030398492  | 0.551420828 | 0.457737725 | 0.999071534 | Btrc          | Btrc          | BTRC       | 25.12445201 | 17.60914319 | 13.26208341 | 15.33344555 | 19.16295055 | 17.24463228 | 12.16647517 | 18.44501479 | 10.13535651 | 15.22863873 |
| ENSMUSG00000020389  | -0.291563719 | 2.658208545  | 0.551268646 | 0.457799789 | 0.999071534 | Cdkl3         | Cdkl3         | CDKL3      | 6.807463254 | 6.106874574 | 6.260780492 | 9.435966491 | 6.474853598 | 4.875064822 | 2.912188207 | 5.872008453 | 5.892649132 | 6.731973344 |
| ENSMUSG00000078937  | 0.870165819  | 1.249018346  | 0.55103762  | 0.457894033 | 0.999071534 | Cpt1b         | Cpt1b         | CPT1B      | 0.350900168 | 1.956571465 | 2.692808814 | 3.191576901 | 0           | 0.072762162 | 0.129430587 | 0           | 7.385453579 | 4.967281302 |
| ENSMUSG00000085794  | 0.925258052  | -0.35832215  | 0.551000723 | 0.457909087 | 0.999071534 | Vax2os        | Vax2os        |            | 0.561440268 | 0.177870133 | 1.481044848 | 0.20814632  | 0           | 0           | 0.064715293 | 0.069082452 | 2.671334273 | 0.915025503 |
| ENSMUSG00000087088  | -0.525300262 | 0.918796833  | 0.55095759  | 0.457926687 | 0.999071534 | Gm16638       | Gm16638       |            | 1.754500839 | 2.312311732 | 3.567971678 | 0.901967385 | 2.223687094 | 2.40115133  | 1.29430587  | 0.621742072 | 0           | 3.006512367 |
| ENSMUSG00000084786  | 0.188347604  | 6.729185145  | 0.550796305 | 0.457992507 | 0.999071534 | Ubl5          | Ubl5          | UBL5       | 93.97106491 | 73.10462475 | 120.2339135 | 126.969255  | 97.05740141 | 86.07763708 | 99.2732602  | 123.6575898 | 104.4963113 | 120.9794433 |
| ENSMUSG00000061755  | 0.241560027  | 6.173874237  | 0.550653995 | 0.458050595 | 0.999071534 | Bod1l         | Bod1l         | BOD1L1     | 37.82703808 | 60.41655525 | 86.3718427  | 76.66722774 | 80.18354052 | 59.95602109 | 31.7104938  | 81.65545873 | 88.38973699 | 103.9207536 |
| ENSMUSG00000028886  | -0.17889671  | 4.597558217  | 0.550647466 | 0.458053261 | 0.999071534 | Eya3          | Eya3          | EYA3       | 25.12445201 | 33.26171491 | 27.06272858 | 18.87193298 | 28.97333479 | 32.45192404 | 19.09101158 | 21.6228076  | 16.57798623 | 21.24166346 |
| ENSMUSG00000028461  | 0.236305082  | 5.52966922   | 0.550456192 | 0.458131354 | 0.999071534 | Ccdc107       | Ccdc107       | CCDC107    | 45.75738187 | 28.45922132 | 50.6248057  | 56.61579894 | 36.69083706 | 24.44808627 | 38.18202315 | 46.90698518 | 68.11902397 | 50.52247956 |
| ENSMUSG00000031392  | 0.213233224  | 7.42891656   | 0.550256182 | 0.458213037 | 0.999071534 | Irak1         | Irak1         | IRAK1      | 144.9217693 | 122.848972  | 202.4319026 | 196.4901257 | 157.0315504 | 183.9427443 | 105.4859284 | 169.9428329 | 207.0284062 | 208.6911737 |
| ENSMUSG00000028438  | 0.32406454   | 2.232463442  | 0.550158069 | 0.458253114 | 0.999071534 | Klf24         | Klf24         | KIF24      | 4.772242281 | 2.608761954 | 4.241173882 | 6.383153803 | 2.87771271  | 7.057929668 | 4.206494076 | 2.763298096 | 5.735511822 | 4.771204409 |
| ENSMUSG00000010142  | -0.340478603 | 2.224416034  | 0.549901742 | 0.458357845 | 0.999071534 | Tnfrsf13b     | Tnfrsf13b     | TNFRSF13B  | 6.386383052 | 5.395394041 | 4.981696305 | 3.677251647 | 6.017035667 | 8.876983706 | 5.241938772 | 1.796143762 | 1.492804447 | 3.202589261 |
| ENSMUSG00000026867  | 0.149719713  | 5.579900366  | 0.54987752  | 0.458367744 | 0.999071534 | Gapvd1        | Gapvd1        | GAPVD1     | 53.75790569 | 50.63369792 | 49.34572151 | 37.119427   | 44.60454701 | 66.06804266 | 43.55339251 | 43.2456152  | 42.11279913 | 49.3460182  |
| ENSMUSG00000037349  | 0.202070105  | 4.225701107  | 0.549750899 | 0.458419495 | 0.999071534 | Nudt22        | Nudt22        | NUDT22     | 19.72058943 | 11.97658897 | 17.30129663 | 22.34103831 | 17.98570444 | 18.62711335 | 22.39149154 | 20.93198308 | 17.36367278 | 15.81686941 |
| ENSMUSG00000030201  | -0.167068683 | 5.412188807  | 0.549622145 | 0.458472126 | 0.999071534 | Lrp6          | Lrp6          | LRP6       | 34.1074963  | 52.88671961 | 52.57709209 | 48.84500301 | 44.01592395 | 47.73197796 | 30.09261147 | 43.17653275 | 35.43446345 | 36.60102012 |
| ENSMUSG00000037773  | 0.199954662  | 4.287924118  | 0.549599779 | 0.45848127  | 0.999071534 | Pced1a        | Pced1a        | PCED1A     | 19.01878909 | 17.60914319 | 19.5228639  | 17.13738032 | 20.53640434 | 21.10102684 | 11.51932224 | 24.3861057  | 19.48502646 | 22.61420172 |
| ENSMUSG000000097709 | 0.276393573  | 2.85513354   | 0.549235784 | 0.458630121 | 0.999071534 | 2810429I04Rik | 2810429I04Rik |            | 9.895384729 | 6.04758453  | 4.510454763 | 7.215739081 | 5.690022859 | 12.44232962 | 9.319002261 | 6.35558562  | 4.478413341 | 6.209101628 |
| ENSMUSG00000030509  | -0.246290864 | 3.576353862  | 0.549107325 | 0.45868267  | 0.999071534 | Asb7          | Asb7          | ASB7       | 10.59718506 | 13.10309981 | 9.89607239  | 19.0800793  | 13.27672    | 13.16995124 | 9.642578728 | 15.40538688 | 7.228316269 | 7.124127131 |
| ENSMUSG00000033847  | 0.426152527  | 1.379189115  | 0.549067086 | 0.458699133 | 0.999071534 | Pla2g4c       | Pla2g4c       | PLA2G4C    | 0.421080201 | 2.01586151  | 2.827449254 | 2.636520049 | 3.008517833 | 2.546675653 | 2.265035272 | 2.625133191 | 4.32127603  | 1.437897219 |
| ENSMUSG00000054021  | 0.302841501  | 3.142499139  | 0.54903932  | 0.458710493 | 0.999071534 | Sirt5         | Sirt5         | SIRT5      | 3.859901845 | 6.640484974 | 10.09803305 | 11.23990126 | 8.240722761 | 7.494502637 | 5.371369359 | 9.464295978 | 12.80669078 | 9.542408818 |
| ENSMUSG00000097412  | -0.361313795 | 1.399455662  | 0.548756097 | 0.458826398 | 0.999071534 | 1810014801Rik | 1810014801Rik |            | 2.596661241 | 3.379532531 | 3.231370576 | 2.705902155 | 2.681505025 | 2.255627007 | 3.818202315 | 2.210638477 | 1.099961171 | 1.30717929  |
| ENSMUSG00000035953  | -0.176378324 | 5.573734685  | 0.548703732 | 0.458847833 | 0.999071534 | Tmem55b       | Tmem55b       | TMEM55B    | 64.28491072 | 63.32176743 | 36.89148075 | 41.55988182 | 56.83482603 | 52.7525671  | 55.39629122 | 51.25917968 | 26.32049946 | 32.74484122 |
| ENSMUSG00000042042  | 0.193011137  | 5.160528443  | 0.548565831 | 0.458904288 | 0.999071534 | Csgalnact2    | Csgalnact2    | CSGALNACT2 | 41.47639982 | 36.64124744 | 34.66991348 | 31.84638691 | 28.12310149 | 42.9296753  | 61.67367469 | 33.71223677 | 24.12057712 | 23.46386826 |
| ENSMUSG00000046707  | -0.149919817 | 5.479487688  | 0.548548009 | 0.458911585 | 0.999071534 | Csnk2a2       | Csnk2a2       | CSNK2A2    | 50.45944412 | 53.95394041 | 45.10454763 | 43.01690606 | 50.81779036 | 52.7525671  | 36.49942552 | 45.73258348 | 31.58459935 | 38.88858388 |

|                     |              |              |             |             |             |               |               |          |             |             |             |             |             |             |             |             |             |             |
|---------------------|--------------|--------------|-------------|-------------|-------------|---------------|---------------|----------|-------------|-------------|-------------|-------------|-------------|-------------|-------------|-------------|-------------|-------------|
| ENSMUSG00000060803  | -0.191152778 | 8.650288436  | 0.54815455  | 0.459072726 | 0.999071534 | Gstp1         | Gstp1         | GSTP1    | 470.3465848 | 357.6968379 | 484.7729067 | 483.8708111 | 420.9308864 | 369.9955913 | 411.4598359 | 331.3885241 | 263.3621319 | 440.4540618 |
| ENSMUSG00000018541  | 0.194946513  | 4.923640367  | 0.547987567 | 0.459141141 | 0.999071534 | Cwc25         | Cwc25         | CWC25    | 22.3874307  | 28.63709145 | 34.93919436 | 27.47531419 | 32.76668336 | 28.59552948 | 18.76743511 | 41.31130653 | 26.32049946 | 39.15001974 |
| ENSMUSG00000038264  | -0.280181939 | 5.358139797  | 0.547910933 | 0.459172544 | 0.999071534 | Sema7a        | Sema7a        | SEMA7A   | 52.63502516 | 89.17222679 | 42.88298036 | 15.74973819 | 34.72876021 | 67.08671292 | 47.50102541 | 38.47892598 | 13.19953406 | 21.30702243 |
| ENSMUSG000000062997 | -0.229547693 | 8.202762679  | 0.547723432 | 0.459249393 | 0.999071534 | Rpb35         | Rpb35         | RPL35    | 559.6155875 | 265.9751392 | 256.2207586 | 335.9481599 | 233.4871449 | 254.5948032 | 388.4211915 | 223.1363212 | 172.3796293 | 278.102394  |
| ENSMUSG000000027582 | -0.335004336 | 3.448215578  | 0.547607134 | 0.459297069 | 0.999071534 | Zgpat         | Zgpat         | ZGPAT    | 16.35194782 | 19.74358479 | 7.337904017 | 5.897479057 | 13.73453794 | 19.2819728  | 13.13720458 | 8.013564478 | 1.807079067 | 6.928050238 |
| ENSMUSG000000029153 | 0.183440541  | 5.231002885  | 0.547315375 | 0.45941671  | 0.999071534 | Ociad2        | Ociad2        | OCIAD2   | 32.6337156  | 35.98905696 | 30.89998114 | 39.40903652 | 42.77327528 | 26.19437815 | 46.91858777 | 37.30452429 | 39.12719024 | 37.97355838 |
| ENSMUSG000000022400 | 0.203018229  | 7.496535943  | 0.547160209 | 0.459480358 | 0.999071534 | Rbx1          | Rbx1          | RBX1     | 188.36321   | 105.1212487 | 187.4194934 | 221.9533589 | 163.3101963 | 167.2802093 | 222.1676025 | 165.6597208 | 164.8370384 | 203.9199693 |
| ENSMUSG000000057406 | 0.19093677   | 6.761970127  | 0.547131329 | 0.459492206 | 0.999071534 | Whsc1         | Whsc1         | WHSC1    | 124.4291995 | 92.13672901 | 115.3195374 | 91.44561643 | 103.1398396 | 200.5325172 | 132.7957822 | 61.41430018 | 85.87554002 | 95.55480611 |
| ENSMUSG00000032370  | 0.205955031  | 3.989602348  | 0.546970901 | 0.459558031 | 0.999071534 | Lactb         | Lactb         | LACTB    | 17.33446828 | 13.93316044 | 17.03201575 | 13.87642131 | 13.7999405  | 22.41074575 | 18.50857394 | 11.12227484 | 16.81369219 | 12.87571601 |
| ENSMUSG000000073530 | 0.740152944  | -0.58090685  | 0.546748152 | 0.45964945  | 0.999071534 | Pappa2        | Pappa2        | PAPPA2   | 0.140360067 | 0.355740266 | 0.471241542 | 0.693821065 | 0.457817931 | 0.436572969 | 0.129430587 | 1.036236786 | 1.492804447 | 0           |
| ENSMUSG000000024853 | -0.178974217 | 7.622421401  | 0.546673924 | 0.459679921 | 0.999071534 | Sf3b2         | Sf3b2         | SF3B2    | 235.5241926 | 222.6341167 | 200.2776555 | 205.7179459 | 222.434112  | 274.3861111 | 157.3875937 | 149.7016743 | 137.4951464 | 191.0442532 |
| ENSMUSG000000044715 | -0.190470688 | 4.778538779  | 0.546662497 | 0.459684612 | 0.999071534 | Gskip         | Gskip         | GSKIP    | 32.28281543 | 32.72810451 | 24.57188042 | 32.33206165 | 29.10413991 | 32.01535107 | 39.08803726 | 20.24115855 | 14.61376985 | 19.80376624 |
| ENSMUSG000000056145 | -0.355149356 | 2.027861638  | 0.546561923 | 0.459725903 | 0.999071534 | Al504432      | Al504432      | Al504432 | 3.298461576 | 8.359896261 | 3.096730136 | 4.093544286 | 4.120361381 | 6.548594537 | 1.29430587  | 3.108710358 | 3.221314859 | 2.941153403 |
| ENSMUSG000000080977 | -0.560420795 | 3.283831946  | 0.54642074  | 0.459783877 | 0.999071534 | Gm13772       | Gm13772       |          | 14.17636678 | 11.85800888 | 7.068623136 | 17.90058349 | 7.848307392 | 16.73529715 | 16.37296925 | 0.621742072 | 0           | 7.124127131 |
| ENSMUSG000000044033 | 0.394941036  | 2.095134728  | 0.546125863 | 0.459904999 | 0.999071534 | Ccdc141       | Ccdc141       | CCDC141  | 0.771980369 | 2.371601776 | 4.645095204 | 6.175007483 | 4.381971627 | 3.34705943  | 2.329750565 | 5.388431287 | 4.714119306 | 6.405178521 |
| ENSMUSG000000050891 | 0.198630642  | 4.723332675  | 0.546028841 | 0.459944863 | 0.999071534 | Tatdn1        | Tatdn1        | TATDN1   | 22.52779077 | 21.93731643 | 27.60129034 | 29.27924896 | 25.24538878 | 17.68120525 | 25.8214021  | 35.16296827 | 21.68494881 | 32.94091811 |
| ENSMUSG000000028952 | -0.270958426 | 2.875790749  | 0.545944351 | 0.459979582 | 0.999071534 | Zbtb48        | Zbtb48        | ZBTB48   | 10.0357448  | 5.573264174 | 11.04051614 | 6.452535909 | 7.913709953 | 9.168032352 | 6.083273587 | 5.319348834 | 3.353589479 | 8.235229528 |
| ENSMUSG000000029401 | -0.205945018 | 4.435189485  | 0.54592147  | 0.459988984 | 0.999071534 | Rilpl2        | Rilpl2        | RILPL2   | 31.01957483 | 26.56193989 | 17.90717861 | 19.56575405 | 25.04918109 | 20.95550252 | 27.8275762  | 22.58996193 | 9.035395336 | 17.58156145 |
| ENSMUSG000000038072 | 0.227453115  | 3.794039179  | 0.54556684  | 0.46013476  | 0.999071534 | Galnt11       | Galnt11       | GALNT11  | 12.84294614 | 18.0241735  | 9.89607239  | 11.23990126 | 13.86534306 | 13.16995124 | 9.707294022 | 18.44501479 | 11.62816095 | 18.0390742  |
| ENSMUSG000000021823 | -0.220029222 | 8.582835207  | 0.545373952 | 0.46021408  | 0.999071534 | Vcl           | Vcl           | VCL      | 312.2309692 | 597.6436476 | 423.6461466 | 296.6085055 | 521.5200262 | 536.3298926 | 245.7239693 | 460.0891329 | 228.477649  | 278.2984709 |
| ENSMUSG000000034390 | -0.21684819  | 6.742287675  | 0.54522541  | 0.460275178 | 0.999071534 | Cmip          | Cmip          | CMIP     | 91.37440367 | 104.6469284 | 151.2012149 | 123.8470602 | 124.0686593 | 99.75692345 | 40.05876666 | 126.7663001 | 94.28238612 | 110.3259321 |
| ENSMUSG000000047369 | 0.45181128   | 0.97971406   | 0.545135594 | 0.460312128 | 0.999071534 | Dnah14        | Dnah14        |          | 1.824680872 | 0.474320355 | 2.221567271 | 2.358991623 | 1.177246109 | 1.309718907 | 1.423736457 | 1.312566595 | 3.69272679  | 2.0261279   |
| ENSMUSG000000037605 | 0.287792926  | 3.686752631  | 0.545063228 | 0.460341902 | 0.999071534 | Lphn3         | Adgrl3        | ADGRL3   | 10.80772517 | 10.49433786 | 10.83855548 | 17.20676242 | 9.744981678 | 11.93299449 | 5.953807    | 8.289894287 | 20.58498764 | 18.2351511  |
| ENSMUSG000000029832 | 0.830970692  | -0.392691707 | 0.545031553 | 0.460354935 | 0.999071534 | Nfe2l3        | Nfe2l3        | NFE2L3   | 0.350900168 | 0           | 0.673202203 | 0           | 1.373453794 | 1.091432423 | 0.647152935 | 0           | 0.942823861 | 1.241820326 |
| ENSMUSG000000030921 | -0.323209984 | 4.093132425  | 0.544731734 | 0.460478331 | 0.999071534 | Trim30a       | Trim30a       | TRIM5    | 33.54605603 | 30.47508283 | 8.415027543 | 13.46012867 | 12.49188926 | 32.88849701 | 22.7797833  | 8.08264693  | 5.892649132 | 7.908434705 |
| ENSMUSG000000027012 | 0.240554474  | 7.80068642   | 0.544594679 | 0.460534756 | 0.999071534 | Dync1i2       | Dync1i2       | DYNCL12  | 168.6426206 | 171.8818387 | 265.1743479 | 248.2491772 | 201.243682  | 156.5841716 | 135.1902481 | 249.1113233 | 306.8105982 | 268.756062  |
| ENSMUSG000000068758 | -0.224997966 | 3.846435248  | 0.544558724 | 0.46054956  | 0.999071534 | lBra          | lBra          | IL3RA    | 19.43986929 | 10.96865822 | 20.59998742 | 15.40282765 | 13.27672    | 16.00767553 | 10.67802342 | 11.74401691 | 7.542590889 | 18.56194592 |
| ENSMUSG000000031065 | -0.177449033 | 7.04653989   | 0.544422526 | 0.460605645 | 0.999071534 | Cdk16         | Cdk16         | CDK16    | 156.7120149 | 151.8418037 | 137.1312888 | 126.8304908 | 156.9007453 | 202.1332847 | 103.2856084 | 111.8444904 | 70.71178959 | 131.0447238 |
| ENSMUSG000000097290 | 0.267331657  | 3.140964381  | 0.544265157 | 0.460670463 | 0.999071534 | 1300002E11Rik | 1300002E11Rik |          | 8.421604025 | 7.885575906 | 8.549667983 | 9.158438064 | 6.801866406 | 8.003837767 | 11.84289871 | 5.112101477 | 6.678335683 | 14.1828953  |
| ENSMUSG000000096606 | -0.579882813 | -0.297486125 | 0.543947942 | 0.460801161 | 0.999071534 | Gm4980        | Tpbgl         | TPBGL    | 1.263240604 | 1.067220799 | 0.942483085 | 0.624438959 | 0.327012808 | 0.9459081   | 0.776583522 | 0.069082452 | 0.549980586 | 0.326794823 |
| ENSMUSG000000033721 | -0.215431295 | 4.246378491  | 0.54318514  | 0.461115691 | 0.999071534 | Vav3          | Vav3          | VAV3     | 18.59770889 | 29.6450222  | 10.83855548 | 25.81014364 | 19.88237873 | 19.42749713 | 19.67344922 | 18.03052007 | 12.96382809 | 14.50969012 |
| ENSMUSG000000021193 | 0.166059798  | 6.486567224  | 0.543163864 | 0.461124468 | 0.999071534 | Pitrm1        | Pitrm1        | PITRM1   | 79.9350582  | 80.16014004 | 90.3437357  | 93.66584384 | 93.13324771 | 115.5463125 | 79.21151922 | 68.94428749 | 101.1964278 | 89.41106344 |
| ENSMUSG000000025162 | -0.1708033   | 6.826783534  | 0.542851297 | 0.461253453 | 0.999071534 | Csnk1d        | Csnk1d        | CSNK1D   | 142.254928  | 149.2923318 | 119.8973124 | 95.81668914 | 118.5094416 | 165.3883931 | 103.0914625 | 90.70525999 | 63.09063004 | 108.626599  |
| ENSMUSG000000039670 | 0.364012942  | 1.736910205  | 0.54267284  | 0.461327121 | 0.999071534 | Oxid1         | Oxid1         | OXLD1    | 3.509001677 | 2.253021687 | 1.88496617  | 2.636520049 | 4.316569065 | 1.528005392 | 3.17104938  | 3.661369977 | 2.985608894 | 5.620870947 |
| ENSMUSG000000039968 | 0.244316098  | 5.581804495  | 0.542615525 | 0.461350785 | 0.999071534 | Rsbni1        | Rsbni1        | RSBN1L   | 35.51109697 | 26.62122994 | 60.72283875 | 57.51776633 | 45.06236494 | 34.70755105 | 26.46855503 | 48.77221139 | 75.11163427 | 52.67932539 |
| ENSMUSG000000024378 | 0.234173976  | 4.524570749  | 0.542401854 | 0.461439022 | 0.999071534 | Stard4        | Stard4        | STARD4   | 30.10723439 | 12.86593964 | 25.51436351 | 19.49637194 | 21.38663764 | 41.9837672  | 31.83992439 | 10.98410993 | 19.56359512 | 18.56194592 |
| ENSMUSG000000079610 | 0.259453667  | 2.861029624  | 0.542326619 | 0.461470097 | 0.999071534 | Ankrd39       | Ankrd39       | ANKRD39  | 7.860163757 | 5.454684085 | 6.866662475 | 7.562649614 | 5.886230544 | 9.09527019  | 8.154126978 | 4.973936572 | 7.385453579 | 7.908434705 |
| ENSMUSG000000005514 | -0.176798354 | 6.362869708  | 0.541643042 | 0.461752593 | 0.999071534 | Por           | Por           | POR      | 111.0248131 | 122.3746517 | 63.41564756 | 64.10906645 | 94.57210407 | 108.2700963 | 87.17150032 | 63.48677375 | 47.29833037 | 75.29352711 |
| ENSMUSG000000071561 | -0.386506361 | 1.717115964  | 0.541614845 | 0.461764252 | 0.999071534 | BC100530      | BC100530      | CSTA     | 4.912602348 | 5.988294485 | 3.90457278  | 2.775284262 | 0.981038424 | 1.600767553 | 2.394465859 | 3.592287524 | 2.357059653 | 2.941153403 |

|                     |              |              |             |             |             |          |          |         |             |             |             |             |             |             |             |             |             |             |
|---------------------|--------------|--------------|-------------|-------------|-------------|----------|----------|---------|-------------|-------------|-------------|-------------|-------------|-------------|-------------|-------------|-------------|-------------|
| ENSMUSG00000046318  | -0.185575333 | 5.957195107  | 0.541459768 | 0.46182838  | 0.999071534 | Ccbe1    | Ccbe1    | CCBE1   | 45.1959416  | 108.7379414 | 68.39734387 | 56.06074209 | 64.61773086 | 79.52904254 | 59.53807    | 64.59209299 | 34.33450228 | 48.2349158  |
| ENSMUSG000000001128 | 0.192005398  | 6.903544274  | 0.541137335 | 0.46196176  | 0.999071534 | Cfp      | Cfp      | CFP     | 150.8870721 | 62.07667649 | 129.3894635 | 126.4141981 | 109.6800958 | 152.0001554 | 128.7187187 | 92.91589847 | 116.5173155 | 126.2081605 |
| ENSMUSG000000029684 | 0.189738624  | 6.298286202  | 0.540633964 | 0.46217011  | 0.999071534 | Wasl     | Wasl     | WASL    | 50.88052432 | 75.95054689 | 90.3437357  | 69.17396023 | 94.83371431 | 83.60372359 | 48.21289364 | 102.7946892 | 78.33294913 | 86.46991004 |
| ENSMUSG000000021694 | 0.274418887  | 2.778421515  | 0.540626418 | 0.462173234 | 0.999071534 | Ercc8    | Ercc8    | ERCC8   | 8.702324159 | 7.114805329 | 6.395420932 | 4.02416218  | 5.559217736 | 7.858313444 | 9.901439902 | 4.283112048 | 6.364061063 | 7.189486096 |
| ENSMUSG000000083004 | 0.569467844  | -0.413443135 | 0.54043301  | 0.462253328 | 0.999071534 | Gm13413  | Gm13413  |         | 0.561440268 | 0.237160178 | 1.009803305 | 0.277528426 | 0.523220493 | 0.509335131 | 0.647152935 | 1.174401691 | 0.785686551 | 0.392153787 |
| ENSMUSG000000042508 | 0.202731099  | 5.218043874  | 0.540215992 | 0.462343226 | 0.999071534 | Dmtf1    | Dmtf1    | DMTF1   | 26.87895285 | 40.19865011 | 36.55487965 | 29.76492371 | 46.04340336 | 28.30448083 | 26.53327033 | 57.54568284 | 37.63438579 | 36.86245598 |
| ENSMUSG000000052316 | -0.287025824 | 6.03593727   | 0.539879135 | 0.462482821 | 0.999071534 | Lrrc15   | Lrrc15   | LRRC15  | 48.35404311 | 95.69413167 | 85.09275851 | 97.82877023 | 43.4273009  | 152.0729176 | 73.51657339 | 25.21509512 | 23.25632191 | 34.77096912 |
| ENSMUSG000000030795 | 0.18214953   | 6.976934697  | 0.539676205 | 0.462566948 | 0.999071534 | Fus      | Fus      | FUS     | 107.0947312 | 101.0895257 | 153.9613439 | 107.472883  | 143.0354022 | 205.1892955 | 106.9096648 | 127.1117124 | 76.05445813 | 150.1949004 |
| ENSMUSG000000078681 | -0.295559817 | 3.20389453   | 0.539561386 | 0.462614559 | 0.999071534 | Tm2d3    | Tm2d3    | TM2D3   | 11.15862533 | 8.893506661 | 6.260780492 | 14.15394974 | 11.24924059 | 11.49642152 | 14.75508691 | 4.352194501 | 3.535589479 | 6.601255415 |
| ENSMUSG000000022066 | 0.196494746  | 3.899472084  | 0.5394871   | 0.462645367 | 0.999071534 | Gm21685  | Gm21685  | ENTPD4  | 16.35194782 | 13.16238986 | 16.08953266 | 11.37866547 | 14.78097892 | 15.71662689 | 14.23736457 | 17.54694291 | 11.94243557 | 16.73189491 |
| ENSMUSG000000040565 | 0.219174509  | 4.291105051  | 0.538948277 | 0.462868922 | 0.999071534 | Btaf1    | Btaf1    | BTAf1   | 25.12445201 | 19.26926443 | 12.45424076 | 13.8070392  | 23.28331193 | 36.23555644 | 26.14497857 | 16.09621141 | 10.29249382 | 16.60117698 |
| ENSMUSG000000037003 | -0.177533245 | 6.082367755  | 0.538806945 | 0.462927588 | 0.999071534 | Tenc1    | Tns2     | TNS2    | 63.79365049 | 80.75304048 | 67.99342255 | 74.79391086 | 85.21953776 | 74.79950204 | 34.10495966 | 77.23418178 | 50.28393926 | 70.78375856 |
| ENSMUSG000000021143 | -0.199816128 | 5.388797375  | 0.538804905 | 0.462928435 | 0.999071534 | Pacs2    | Pacs2    | PACS2   | 46.81008237 | 58.57856387 | 46.72023292 | 27.26716787 | 54.02251588 | 44.96701582 | 21.29133155 | 52.98624099 | 24.04200846 | 46.2087879  |
| ENSMUSG000000003344 | -0.181310321 | 5.105813278  | 0.538598667 | 0.463014065 | 0.999071534 | Btbd2    | Btbd2    | BTBD2   | 37.40595788 | 46.83913508 | 27.19736902 | 29.20986686 | 49.57514169 | 34.34374024 | 23.29750565 | 38.68617334 | 22.07779208 | 37.45068666 |
| ENSMUSG000000041594 | 0.169215634  | 4.683622824  | 0.538237328 | 0.463164154 | 0.999071534 | Tmtc4    | Tmtc4    | TMTC4   | 22.73833087 | 23.00453723 | 21.40783007 | 26.08767206 | 31.72024237 | 32.45192404 | 30.61033382 | 26.52766172 | 18.46363395 | 24.1174579  |
| ENSMUSG000000031447 | -0.219564464 | 9.274335216  | 0.538197139 | 0.463180852 | 0.999071534 | Lamp1    | Lamp1    | LAMP1   | 629.4447208 | 919.944329  | 510.6911915 | 610.6319197 | 796.7340054 | 708.1941181 | 848.6116434 | 561.8475853 | 246.8627143 | 471.6302879 |
| ENSMUSG000000029844 | -0.385303863 | 0.98911146   | 0.538177947 | 0.463188827 | 0.999071534 | Hoxa1    | Hoxa1    | HOXA1   | 2.526481208 | 2.01586151  | 1.88496617  | 2.22022741  | 2.223687094 | 2.255627007 | 2.459181152 | 1.657978857 | 0.549980586 | 1.045743432 |
| ENSMUSG000000020593 | 0.302451316  | 2.110635801  | 0.538157332 | 0.463197393 | 0.999071534 | Lpin1    | Lpin1    | LPIN1   | 3.298461576 | 4.328173242 | 4.510454763 | 3.885397967 | 3.400933203 | 5.23887563  | 5.232896446 | 4.421276953 | 4.32127603  | 5.751588876 |
| ENSMUSG000000041697 | -0.200207347 | 7.953399807  | 0.537643622 | 0.46341093  | 0.999071534 | Cox6a1   | Cox6a1   | COX6A1  | 320.091133  | 179.2338042 | 288.2651835 | 322.8349418 | 259.9097798 | 227.0907061 | 294.1310089 | 193.7071965 | 163.9727832 | 237.9066308 |
| ENSMUSG000000029402 | -0.342382269 | 2.723784803  | 0.537383391 | 0.463519162 | 0.999071534 | Snnp35   | Snnp35   | SNRNP35 | 10.0357448  | 8.182026128 | 4.712415424 | 4.856747458 | 10.07199449 | 11.49642152 | 8.412988152 | 5.250266382 | 1.335667137 | 2.810435474 |
| ENSMUSG000000051427 | -0.218997502 | 3.778429908  | 0.537379433 | 0.463520808 | 0.999071534 | Ccdc157  | Ccdc157  | CCDC157 | 17.26428825 | 18.0241735  | 16.96469553 | 8.04832436  | 16.08903015 | 14.04309717 | 10.41916225 | 11.88218181 | 12.64955347 | 11.17638293 |
| ENSMUSG000000080866 | 0.553991544  | 1.457322399  | 0.537068087 | 0.463650353 | 0.999071534 | Gm5687   | Gm5687   |         | 3.509001677 | 3.379532531 | 0.942483085 | 0.346910533 | 2.943115272 | 2.546675653 | 5.565515239 | 2.486968286 | 0           | 4.836563373 |
| ENSMUSG000000042473 | -0.186119467 | 5.366719574  | 0.536928419 | 0.463708484 | 0.999071534 | Tbc1d8b  | Tbc1d8b  | TBC1D8B | 35.58127701 | 63.44034752 | 37.16076163 | 40.58853233 | 50.88319292 | 36.96317805 | 42.19437135 | 53.19348834 | 20.97783091 | 33.65986672 |
| ENSMUSG000000097117 | 0.758725375  | -0.400221752 | 0.53673971  | 0.463787046 | 0.999071534 | Gm26730  | Gm26730  |         | 0           | 0.237160178 | 0           | 1.526406344 | 0.588623054 | 1.600767553 | 0.258861174 | 0.621742072 | 0.864255206 | 0.588230681 |
| ENSMUSG000000037419 | -0.179087213 | 5.128861963  | 0.536607942 | 0.463841915 | 0.999071534 | Endod1   | Endod1   | ENDOD1  | 44.28360116 | 40.25794015 | 38.64180648 | 33.71970378 | 35.64439607 | 47.44092931 | 45.23599014 | 26.25133191 | 15.71373102 | 28.43114956 |
| ENSMUSG000000022750 | 0.147493604  | 5.544300913  | 0.536127043 | 0.464042252 | 0.999071534 | Klh22    | Klh22    | KLHL22  | 47.23116257 | 53.36103997 | 37.56468295 | 45.16775136 | 45.9780008  | 62.35717242 | 46.72444189 | 46.42340801 | 40.22715141 | 42.15653211 |
| ENSMUSG000000044211 | -0.457142997 | 2.453246831  | 0.535934904 | 0.464122334 | 0.999071534 | Gm7887   | Gm7887   |         | 12.49204597 | 10.19788764 | 3.433331237 | 2.01208109  | 4.316569065 | 8.367648575 | 9.189571674 | 3.108710358 | 0.31427462  | 2.222204793 |
| ENSMUSG000000030452 | 0.180638268  | 5.580418601  | 0.535874318 | 0.46414759  | 0.999071534 | Nipa2    | Nipa2    | NIPA2   | 49.54710368 | 52.05665899 | 47.86467666 | 39.68656495 | 43.49270346 | 57.84591841 | 83.93573564 | 36.33736996 | 33.47024707 | 36.47030219 |
| ENSMUSG000000039055 | 0.332934948  | 2.285269608  | 0.535714935 | 0.464214042 | 0.999071534 | Eme1     | Eme1     | EME1    | 7.368903522 | 2.312311732 | 3.231370576 | 3.81601586  | 5.166802366 | 9.022508029 | 5.889091707 | 3.246875263 | 1.964216377 | 6.601255415 |
| ENSMUSG000000086712 | -0.530408644 | 0.640585171  | 0.535520787 | 0.464295009 | 0.999071534 | Al427809 | Al427809 |         | 1.824680872 | 2.668051998 | 2.086926831 | 0.416292639 | 1.765869163 | 2.328389169 | 1.747312924 | 1.105319238 | 0           | 0.784307574 |
| ENSMUSG000000002107 | 0.229125757  | 6.251059107  | 0.535473887 | 0.464314572 | 0.999071534 | Celf2    | Celf2    | CELf2   | 46.2486421  | 45.94978442 | 103.2018978 | 87.42145425 | 78.35226879 | 79.82009119 | 43.16510075 | 79.85931497 | 108.1104694 | 72.87524542 |
| ENSMUSG000000085395 | -0.427876264 | 1.232288665  | 0.535058803 | 0.464487764 | 0.999071534 | Gm13056  | Gm13056  |         | 3.087921476 | 2.193731643 | 3.231370576 | 3.122194795 | 1.504258917 | 0.436572969 | 0.970729402 | 3.039627905 | 1.807079067 | 2.483640651 |
| ENSMUSG000000028975 | -0.266814626 | 4.436328678  | 0.534836469 | 0.464580575 | 0.999071534 | Pex14    | Pex14    | PEX14   | 35.01983674 | 28.044191   | 17.63789773 | 17.48429085 | 24.59136316 | 29.61419974 | 31.96935498 | 19.27400422 | 4.242707375 | 13.72538255 |
| ENSMUSG000000054051 | 0.225083941  | 3.572055386  | 0.534820885 | 0.464587081 | 0.999071534 | Ercc6    | Ercc6    | ERCC6   | 8.421604025 | 12.21374915 | 14.60848781 | 8.950291745 | 12.16487646 | 16.73529715 | 8.348272859 | 12.22759407 | 11.5495923  | 12.61428015 |
| ENSMUSG000000021520 | 0.227608074  | 7.429741     | 0.534723462 | 0.46462776  | 0.999071534 | Uqcrb    | Uqcrb    | UQCRB   | 153.1328332 | 90.47660777 | 207.7502    | 227.2263989 | 138.1956127 | 124.2777719 | 174.6018618 | 174.5022747 | 193.4360289 | 205.6193023 |
| ENSMUSG000000020775 | 0.169243636  | 5.935677827  | 0.534666272 | 0.464651642 | 0.999071534 | Mrpl38   | Mrpl38   | MRPL38  | 56.0738468  | 43.51889259 | 74.32152326 | 56.33827052 | 68.14946918 | 56.60896166 | 62.19139703 | 54.64421984 | 67.0190628  | 65.94719519 |
| ENSMUSG000000025198 | 0.160905003  | 5.900122343  | 0.534645509 | 0.464660312 | 0.999071534 | Erlin1   | Erlin1   | ERLIN1  | 61.12680921 | 57.74850325 | 51.43264834 | 55.64449495 | 66.51440514 | 69.92443722 | 87.75393796 | 47.5978097  | 51.54103774 | 47.90812098 |
| ENSMUSG000000032320 | 0.17489364   | 6.73748658   | 0.534636217 | 0.464664193 | 0.999071534 | Rcn2     | Rcn2     | RCN2    | 113.9021944 | 78.61859888 | 102.5960158 | 110.1787852 | 113.9966649 | 129.1528367 | 160.1703514 | 85.1786638  | 82.49708785 | 93.7247551  |
| ENSMUSG000000085767 | -0.460444199 | 0.726740697  | 0.534096726 | 0.464889585 | 0.999071534 | Gm13563  | Gm13563  |         | 2.807201342 | 1.660121243 | 2.086926831 | 0.763203172 | 1.896674286 | 0.9459081   | 0.453007054 | 2.556050739 | 0.549980586 | 1.633974113 |

|                      |              |              |             |             |             |               |               |           |             |             |             |             |             |             |             |             |             |             |
|----------------------|--------------|--------------|-------------|-------------|-------------|---------------|---------------|-----------|-------------|-------------|-------------|-------------|-------------|-------------|-------------|-------------|-------------|-------------|
| ENSMUSG00000025421   | 0.192865858  | 4.571103979  | 0.534088574 | 0.464892992 | 0.999071534 | Hdhd2         | Hdhd2         | HDHD2     | 28.84399379 | 21.70015625 | 21.07122897 | 17.27614453 | 26.2264272  | 29.46867542 | 37.98787727 | 20.51748836 | 15.47802505 | 20.19592003 |
| ENSMUSG00000026656   | -0.195246368 | 7.703021365  | 0.533864283 | 0.46498675  | 0.999071534 | Fcgr2b        | Fcgr2b        | FCGR2C    | 249.2794791 | 243.2670522 | 232.1201197 | 199.889849  | 231.7866783 | 265.5818896 | 250.1893246 | 183.7593234 | 86.03267733 | 181.3711265 |
| ENSMUSG000000081394  | 0.552953737  | 0.844860364  | 0.533563563 | 0.465112505 | 0.999071534 | Gm13215       | Gm13215       |           | 3.579181711 | 1.007930755 | 1.481044848 | 0.069382107 | 1.046440986 | 0.509335131 | 1.229590576 | 1.174401691 | 3.378452169 | 2.679717545 |
| ENSMUSG000000004221  | -0.166744838 | 5.388162677  | 0.533503259 | 0.465137729 | 0.999071534 | Ikbkg         | Ikbkg         | IKBKG     | 49.54710368 | 59.05288423 | 29.95749805 | 45.02898715 | 45.91259824 | 41.83824288 | 39.28218314 | 41.7948837  | 25.14196963 | 43.33299347 |
| ENSMUSG000000002679  | 0.189374994  | 4.983744472  | 0.533408806 | 0.465177242 | 0.999071534 | Med6          | Med6          | MED6      | 35.1601968  | 20.81080559 | 28.94769475 | 37.32757332 | 30.01977577 | 25.32123221 | 41.09421136 | 31.84701055 | 33.15597245 | 27.32004716 |
| ENSMUSG00000040441   | 0.615028499  | -0.502262738 | 0.533299443 | 0.465222999 | 0.999071534 | Slc26a10      | Slc26a10      | SLC26A10  | 0.421080201 | 0.118580089 | 0.201960661 | 0.485674746 | 1.111843547 | 1.382481069 | 0.776583522 | 0.27632981  | 0.235705965 | 0.849666539 |
| ENSMUSG000000031796  | 0.155774581  | 5.185118313  | 0.533073453 | 0.465317575 | 0.999071534 | Gtb3          | Cfap20        | CFAP20    | 36.63397751 | 34.03248549 | 33.05422819 | 37.0500449  | 37.14865499 | 36.89041589 | 44.26526074 | 39.44608032 | 25.45624425 | 38.95394284 |
| ENSMUSG00000047766   | -0.246948183 | 3.190019438  | 0.532912087 | 0.465385124 | 0.999071534 | Lrrc49        | Lrrc49        | LRRC49    | 8.351423991 | 13.39955004 | 7.068623136 | 12.35001497 | 9.287163747 | 12.15128097 | 6.730390522 | 6.770080335 | 6.442629718 | 8.300588492 |
| ENSMUSG000000032649  | -0.685879125 | 0.155428523  | 0.532900966 | 0.46538978  | 0.999071534 | Colgalt2      | Colgalt2      | COLGALT2  | 1.052700503 | 1.660121243 | 1.144443746 | 0.20814632  | 2.223687094 | 1.528005392 | 0.970729402 | 1.312566595 | 0           | 0           |
| ENSMUSG00000040822   | 0.180255602  | 5.085864215  | 0.532836963 | 0.465416577 | 0.999071534 | 1700123O20Rik | 1700123O20Rik | C14orf119 | 37.75685805 | 32.66881447 | 30.36141937 | 31.08318373 | 32.96289104 | 29.54143758 | 55.00799946 | 34.05764903 | 27.34189197 | 26.53573959 |
| ENSMUSG000000085550  | 1.094591764  | -0.533189874 | 0.532765583 | 0.465446466 | 0.999071534 | Gm15658       | Gm15658       |           | 0.701800335 | 0           | 0.673202203 | 0.555056852 | 0           | 0           | 0           | 0           | 2.278490998 | 1.111102397 |
| ENSMUSG00000030042   | 0.166423483  | 6.113322283  | 0.532692085 | 0.465477245 | 0.999071534 | Pole4         | Pole4         | POLE4     | 75.44353606 | 54.6061309  | 68.06074277 | 73.47565084 | 65.86037953 | 80.69323713 | 102.1207331 | 52.29541646 | 54.52664664 | 65.68575933 |
| ENSMUSG00000015176   | 0.202634554  | 5.66967729   | 0.53233088  | 0.465627629 | 0.999071534 | Nolc1         | Nolc1         | NOLC1     | 54.45970603 | 37.82704833 | 59.9149961  | 38.50706913 | 55.13435943 | 103.613318  | 50.67207479 | 23.28078646 | 42.50564241 | 52.09109471 |
| ENSMUSG000000050721  | -0.204780553 | 5.732694793  | 0.532238857 | 0.465667116 | 0.999071534 | Plekho2       | Plekho2       | PLEKHO2   | 57.61780754 | 87.15636528 | 43.15226124 | 38.02139439 | 71.02718189 | 87.09630734 | 45.81842778 | 54.36789003 | 20.58498764 | 41.04542971 |
| ENSMUSG000000097320  | -0.730870588 | 0.200390508  | 0.532150517 | 0.465704138 | 0.999071534 | C630016N16Rik | Tmem147os     |           | 1.333420637 | 4.03172302  | 0           | 0.277528426 | 0.915635862 | 1.236956746 | 0.517722348 | 1.519813953 | 0           | 0.522871716 |
| ENSMUSG000000021905  | 0.19739819   | 5.590005085  | 0.532077091 | 0.465734914 | 0.999071534 | Dph3          | Dph3          | DPH3      | 64.35509076 | 40.96942069 | 42.6810197  | 38.02139439 | 47.22064947 | 42.27481584 | 91.18384851 | 37.92626636 | 32.76312918 | 44.18266001 |
| ENSMUSG000000028560  | 0.248158509  | 5.534859652  | 0.53181892  | 0.46584315  | 0.999071534 | Usp1          | Usp1          | USP1      | 63.65329042 | 39.54645962 | 41.40193551 | 33.16464693 | 42.70787272 | 98.81101535 | 77.72306747 | 16.51070612 | 28.67755911 | 33.39843086 |
| ENSMUSG00000048047   | 0.158191341  | 5.596609936  | 0.531746189 | 0.465873649 | 0.999071534 | Zbtb33        | Zbtb33        | ZBTB33    | 36.21289731 | 49.8036373  | 47.9993171  | 43.4331987  | 59.58173361 | 47.36816715 | 53.51954771 | 58.78916699 | 37.94866041 | 47.3198903  |
| ENSMUSG000000022377  | -0.175114701 | 6.067264498  | 0.531654764 | 0.465911992 | 0.999071534 | Asap1         | Asap1         | ASAP1     | 55.37204646 | 85.91127435 | 70.95551224 | 66.32929386 | 90.45174269 | 97.93786941 | 42.45323252 | 57.06210568 | 39.28432755 | 75.35888607 |
| ENSMUSG000000022386  | 0.245993732  | 3.181229443  | 0.531625385 | 0.465924314 | 0.999071534 | Trmu          | Trmu          | TRMU      | 11.5095255  | 8.893506661 | 7.472544458 | 5.758714844 | 9.090956062 | 11.86023233 | 9.254286968 | 8.635306549 | 5.185531236 | 12.81035704 |
| ENSMUSG000000053128  | -0.477274041 | 3.527644839  | 0.531380566 | 0.466027019 | 0.999071534 | Rnf26         | Rnf26         | RNF26     | 19.29950922 | 14.64464097 | 11.5790779  | 11.17051915 | 12.36108414 | 28.52276732 | 10.74273872 | 5.664761096 | 0           | 6.470537486 |
| ENSMUSG000000005873  | -0.197786825 | 7.923796425  | 0.531357807 | 0.466036568 | 0.999071534 | Reep5         | Reep5         | REEP5     | 328.442557  | 242.1405414 | 256.2880788 | 283.287141  | 234.4027808 | 290.102738  | 321.7644392 | 156.3335898 | 150.2232685 | 193.4625349 |
| ENSMUSG000000018362  | 0.298050831  | 7.070588538  | 0.531286553 | 0.466066467 | 0.999071534 | Kpna2         | Kpna2         | KPNA2     | 68.6360728  | 34.32893571 | 191.1221056 | 194.8943373 | 128.2544233 | 122.3859557 | 134.4136646 | 82.20811835 | 194.8502466 | 157.4497455 |
| ENSMUSG000000086907  | 0.384318234  | 1.676753193  | 0.531284828 | 0.466067192 | 0.999071534 | Gm15298       | Gm15298       |           | 4.35116208  | 3.913142931 | 1.211763966 | 1.387642131 | 3.073920395 | 3.201535107 | 1.68259763  | 5.388431287 | 1.885647722 | 4.64048648  |
| ENSMUSG000000056014  | -0.377310177 | 1.102178337  | 0.531178401 | 0.466111856 | 0.999071534 | A430033K04Rik | A430033K04Rik |           | 2.315941107 | 2.668051998 | 2.01960661  | 2.914048475 | 1.831271725 | 2.692199976 | 1.359021163 | 1.934308667 | 1.807079067 | 0.71894861  |
| ENSMUSG0000000025921 | 0.245450839  | 7.090216263  | 0.531124066 | 0.466134662 | 0.999071534 | Rdh10         | Rdh10         | RDH10     | 91.72530384 | 136.7228424 | 96.53719597 | 141.8170258 | 179.464629  | 71.45244261 | 88.20694501 | 199.4410401 | 158.0801341 | 167.3189491 |
| ENSMUSG000000024420  | -0.548449564 | 0.409688218  | 0.531113636 | 0.46613904  | 0.999071534 | Zfp521        | Zfp521        | ZNF521    | 0.842160403 | 3.972432975 | 1.548365068 | 0.485674746 | 0.523220493 | 1.45524323  | 0.647152935 | 0.898071881 | 1.414235792 | 0.196076894 |
| ENSMUSG000000015653  | 0.175046046  | 7.195381281  | 0.530705502 | 0.466310403 | 0.999071534 | Steap2        | Steap2        | STEAP2    | 138.2546661 | 134.7069809 | 137.8718113 | 152.9875449 | 149.1178404 | 142.0317393 | 138.1024363 | 163.1727526 | 153.2874461 | 141.1100044 |
| ENSMUSG000000062515  | -0.159637597 | 5.574155226  | 0.530505087 | 0.466394588 | 0.999071534 | Fabp4         | Fabp4         | FABP4     | 58.31960787 | 42.15522157 | 60.58819831 | 50.37140935 | 48.72490839 | 60.02878326 | 39.15275255 | 31.6397632  | 33.941659   | 55.09760708 |
| ENSMUSG000000079435  | -0.234962711 | 8.659237645  | 0.530322531 | 0.466471293 | 0.999071534 | Rpl36a        | Rpl36a        |           | 461.7144407 | 300.1262048 | 598.5440791 | 581.2139066 | 309.6811292 | 249.5014519 | 316.0694934 | 312.5290146 | 423.249345  | 433.5260116 |
| ENSMUSG000000034723  | -0.189158009 | 5.085858068  | 0.530198371 | 0.466523472 | 0.999071534 | Tmx4          | Tmx4          | TMX4      | 32.70389563 | 52.59026939 | 31.775144   | 30.87503741 | 39.69935489 | 42.34757801 | 41.676649   | 34.88663846 | 17.59937874 | 19.60768935 |
| ENSMUSG000000026669  | 0.340407253  | 3.3636516123 | 0.530070851 | 0.466577074 | 0.999071534 | Mcm10         | Mcm10         | MCM10     | 20.28202969 | 5.217523908 | 10.97319592 | 9.713494917 | 10.39900729 | 34.63478888 | 15.9199622  | 3.523205072 | 10.29249382 | 6.274460592 |
| ENSMUSG000000006058  | 0.19924024   | 7.028038285  | 0.530055047 | 0.466583718 | 0.999071534 | Snf8          | Snf8          | SNF8      | 144.0094288 | 82.76890199 | 144.6711535 | 144.8698385 | 111.5113675 | 117.3653665 | 142.7619374 | 94.50479487 | 153.6017207 | 149.8027466 |
| ENSMUSG000000015837  | -0.221123263 | 8.870451238  | 0.529969812 | 0.466619551 | 0.999071534 | Sqstm1        | Sqstm1        | SQSTM1    | 446.9766336 | 644.897813  | 522.8088312 | 452.2325705 | 551.9976199 | 348.0941807 | 237.4404118 | 621.3275768 | 399.6787485 | 436.5978829 |
| ENSMUSG000000031325  | -0.362799957 | 1.346357592  | 0.529956104 | 0.466625315 | 0.999071534 | 4930519F16Rik | 4930519F16Rik |           | 2.105401006 | 1.660121243 | 3.702612119 | 3.81601586  | 2.681505025 | 2.110102684 | 1.229590576 | 2.348803381 | 1.807079067 | 2.61435858  |
| ENSMUSG000000032420  | -0.20918298  | 5.790482316  | 0.529933731 | 0.466634722 | 0.999071534 | Nt5e          | Nt5e          | NT5E      | 64.91653103 | 104.5876383 | 49.81696305 | 48.63685669 | 40.22257538 | 65.12213456 | 80.44110979 | 40.55139956 | 28.99183373 | 37.77748148 |
| ENSMUSG000000032279  | 0.177184615  | 5.918311972  | 0.529845033 | 0.466672018 | 0.999071534 | Idh3a         | Idh3a         | IDH3A     | 53.12628539 | 49.8036373  | 78.49537692 | 48.63685669 | 64.35612061 | 81.93019387 | 85.48890269 | 49.0485412  | 56.01945108 | 38.82322492 |
| ENSMUSG000000024899  | -0.346298252 | 2.754197048  | 0.529836541 | 0.466675589 | 0.999071534 | Papss2        | Papss2        | PAPSS2    | 9.12340436  | 9.96072746  | 11.30979702 | 2.567137942 | 5.75542542  | 15.20729176 | 3.688771728 | 4.835771668 | 2.907040239 | 3.529384083 |
| ENSMUSG000000020132  | 0.147334065  | 6.323231671  | 0.529721314 | 0.466724048 | 0.999071534 | Rab21         | Rab21         | RAB21     | 75.16281592 | 80.87162057 | 77.35093317 | 76.52846352 | 83.91148653 | 93.06280459 | 89.04824383 | 77.71775894 | 72.83314328 | 72.5484506  |

|                     |              |              |             |             |             |               |          |               |             |             |             |             |             |             |             |             |             |             |
|---------------------|--------------|--------------|-------------|-------------|-------------|---------------|----------|---------------|-------------|-------------|-------------|-------------|-------------|-------------|-------------|-------------|-------------|-------------|
| ENSMUSG00000051335  | -0.284506079 | 4.453534587  | 0.529612314 | 0.466769896 | 0.999071534 | Gfod1         | Gfod1    | GFOD1         | 25.47535218 | 46.12765455 | 11.30979702 | 11.30928337 | 31.327827   | 36.01726995 | 23.36222095 | 19.13583931 | 6.285492408 | 15.16327977 |
| ENSMUSG00000060961  | -0.266526295 | 3.631192759  | 0.529501703 | 0.466816429 | 0.999071534 | Slc4a4        | Slc4a4   | SLC4A4        | 13.12366627 | 21.93731643 | 8.549667983 | 11.79495811 | 14.25775843 | 10.69603774 | 5.565515239 | 16.71795348 | 11.78529826 | 7.843075741 |
| ENSMUSG00000025816  | 0.185179538  | 4.814437441  | 0.529306313 | 0.466898646 | 0.999071534 | Sec61a2       | Sec61a2  | SEC61A2       | 25.68589228 | 19.6250047  | 37.36272229 | 25.393851   | 27.86149124 | 23.93875114 | 27.05099267 | 30.60352641 | 29.2275397  | 30.26120057 |
| ENSMUSG00000097636  | 0.250168501  | 3.388919779  | 0.529259531 | 0.466918334 | 0.999071534 | 5830416P10Rik | Mirt1    |               | 13.40438641 | 10.0200175  | 9.626791509 | 4.926129565 | 11.51085084 | 8.513172898 | 13.13720458 | 9.118883716 | 9.978219197 | 12.74499808 |
| ENSMUSG00000015355  | -0.285493942 | 3.112337743  | 0.529247464 | 0.466923413 | 0.999071534 | Cd48          | Cd48     | CD48          | 15.79050755 | 8.715636528 | 7.80914556  | 5.273040098 | 11.44544828 | 13.09718907 | 11.00159989 | 5.18118393  | 4.242707375 | 4.967281302 |
| ENSMUSG00000066148  | 0.198937651  | 4.288699374  | 0.529134059 | 0.466971147 | 0.999071534 | Prpf4         | Prpf4    | PRPF4         | 22.31725067 | 17.43127306 | 14.47384737 | 22.2716562  | 17.13547114 | 31.65154026 | 20.70889391 | 13.33291331 | 12.57098482 | 24.90176548 |
| ENSMUSG00000021773  | 0.18335213   | 4.615575063  | 0.528928458 | 0.467057707 | 0.999071534 | Comtd1        | Comtd1   | COMTD1        | 20.70310989 | 19.6250047  | 29.28429585 | 23.86744465 | 24.85297341 | 21.31931333 | 22.65035272 | 25.9750021  | 22.62777267 | 30.98014918 |
| ENSMUSG00000028619  | -0.243874938 | 3.335619446  | 0.528793699 | 0.467114456 | 0.999071534 | Tceanc2       | Tceanc2  | TCEANC2       | 14.24654681 | 12.1544591  | 11.2424768  | 5.82809695  | 13.08051232 | 10.62327558 | 8.477703446 | 9.80970824  | 4.635550651 | 11.24174189 |
| ENSMUSG00000038167  | 0.493770564  | 0.206819836  | 0.528789873 | 0.467116067 | 0.999071534 | Plekhg6       | Plekhg6  | PLEKHG6       | 1.052700503 | 0.770770577 | 0.269280881 | 1.248877918 | 1.046440986 | 1.091432423 | 0.582437641 | 1.72706131  | 0.628549241 | 1.764692042 |
| ENSMUSG00000019998  | 0.177085706  | 7.001052307  | 0.528584359 | 0.467202633 | 0.999071534 | Stx7          | Stx7     | STX7          | 114.3232746 | 124.3905132 | 120.5031944 | 114.1335653 | 151.1453198 | 107.9790477 | 143.4738056 | 164.2780718 | 113.7674126 | 117.1232644 |
| ENSMUSG00000085415  | 0.835102409  | -0.105800004 | 0.528530123 | 0.467225483 | 0.999071534 | Gm12060       | Gm12060  |               | 0.070180034 | 0           | 1.548365068 | 1.248877918 | 0.065402562 | 0.436572969 | 0.129430587 | 0.069082452 | 1.414235792 | 2.745076509 |
| ENSMUSG00000083554  | -0.811041839 | -0.49743945  | 0.528332457 | 0.467308774 | 0.999071534 | Gm6645        | Gm6645   |               | 1.122880537 | 0.296450222 | 1.211763966 | 0           | 1.177246109 | 1.018670261 | 0.776583522 | 0.345412262 | 0           | 0           |
| ENSMUSG00000015290  | 0.153757904  | 6.008795433  | 0.528305768 | 0.467320022 | 0.999071534 | Ubl4          | Ubl4a    | UBL4A         | 65.96923153 | 53.24245988 | 67.11825968 | 66.46805807 | 62.52484889 | 59.66497245 | 72.99885104 | 69.28969975 | 53.97666605 | 68.56155377 |
| ENSMUSG00000057262  | 0.641371657  | 2.39427841   | 0.528266018 | 0.467336775 | 0.999071534 | Gm10020       | Gm10020  |               | 7.018003354 | 8.47847635  | 0           | 2.428373729 | 3.008517833 | 6.766881022 | 8.283557565 | 7.253657501 | 0           | 9.019537102 |
| ENSMUSG00000039096  | 0.233889552  | 3.616134393  | 0.527908843 | 0.467487354 | 0.999071534 | Rsad1         | Rsad1    | RSAD1         | 10.6673651  | 12.1544591  | 9.626791509 | 12.76630761 | 12.55729183 | 11.20537287 | 8.995425794 | 20.58657081 | 10.60676844 | 11.11102397 |
| ENSMUSG00000069565  | 0.152975674  | 6.348836023  | 0.527895394 | 0.467493026 | 0.999071534 | Dazap1        | Dazap1   | DAZAP1        | 76.63659663 | 69.07290173 | 90.14177504 | 65.98238333 | 99.2810885  | 104.2681775 | 75.19917102 | 79.85931497 | 73.54026117 | 82.15621838 |
| ENSMUSG00000022404  | -0.172029035 | 6.118941397  | 0.527627641 | 0.46760596  | 0.999071534 | Slc25a17      | Slc25a17 | SLC25A17      | 88.9181025  | 81.16807079 | 56.95290641 | 71.94924449 | 83.38826603 | 77.56446418 | 94.67847436 | 59.41090906 | 36.9272679  | 52.15645367 |
| ENSMUSG00000081208  | -0.492140196 | 0.451102068  | 0.527331827 | 0.46773078  | 0.999071534 | Gm11400       | Gm11400  |               | 0.421080201 | 2.608761954 | 0.875162864 | 2.497755836 | 0.981038424 | 0.509335131 | 0.841298815 | 1.036236786 | 1.257098482 | 1.111102397 |
| ENSMUSG00000020484  | -0.163959531 | 6.725712445  | 0.526929958 | 0.467900436 | 0.999071534 | Xbp1          | Xbp1     | XBP1          | 121.7623582 | 147.4543404 | 102.5286956 | 82.21779626 | 129.039254  | 137.374961  | 99.92041313 | 89.32361095 | 63.56204197 | 101.5024719 |
| ENSMUSG00000075289  | -0.479168863 | 0.4130419    | 0.526778476 | 0.467964413 | 0.999071534 | Carns1        | Carns1   | CARNS1        | 0.842160403 | 1.719411288 | 1.346404407 | 1.734552664 | 1.569661478 | 0.363810808 | 0.776583522 | 0.414494714 | 1.414235792 | 1.633974113 |
| ENSMUSG00000020225  | 0.206697218  | 6.867254666  | 0.526682949 | 0.468004765 | 0.999071534 | Tmbim4        | Tmbim4   | RP11-745O10.4 | 85.19856072 | 96.99851265 | 110.4051614 | 135.1563436 | 132.1131744 | 76.4002696  | 92.15457791 | 164.9688963 | 103.4749189 | 153.1360538 |
| ENSMUSG00000067768  | 0.437295355  | 1.227624118  | 0.526467227 | 0.468095909 | 0.999071534 | Xlr4b         | Xlr4b    |               | 1.894860906 | 2.01586151  | 3.366011017 | 0.138764213 | 2.419894779 | 3.201535107 | 3.235764674 | 2.348803381 | 1.099961171 | 2.679717545 |
| ENSMUSG00000039824  | -0.402909781 | 1.286882103  | 0.526446951 | 0.468104478 | 0.999071534 | Myf6b         | Myf6b    | MYL6B         | 3.017741442 | 1.719411288 | 4.779735644 | 0.763201372 | 3.466335765 | 2.110102684 | 1.29430587  | 3.039627905 | 1.099961171 | 2.091486864 |
| ENSMUSG00000038212  | 0.146179844  | 5.850059033  | 0.526244771 | 0.468189928 | 0.999071534 | Hiat1l        | Mfsd14b  | MFSD14B       | 55.0211463  | 58.81572405 | 53.92349649 | 55.02001049 | 60.95518741 | 60.82916703 | 71.38096871 | 62.86503168 | 42.03423048 | 55.75119672 |
| ENSMUSG00000061898  | 0.236747369  | 3.077769752  | 0.526107854 | 0.468247811 | 0.999071534 | Rbak          | Rbak     | RBAK          | 7.018003354 | 9.249246928 | 8.482347763 | 6.730064335 | 8.175320199 | 9.895653967 | 6.989251696 | 8.704389002 | 7.071178959 | 10.84958811 |
| ENSMUSG000000004371 | -0.31402448  | 3.911032231  | 0.52604961  | 0.468272437 | 0.999071534 | Il11          | Il11     | IL11          | 20.49256979 | 37.41201802 | 15.28169002 | 4.648601139 | 8.829345815 | 9.240794513 | 17.02012219 | 16.78703593 | 9.428238612 | 10.98030604 |
| ENSMUSG00000025427  | 0.308196069  | 2.407513558  | 0.525927936 | 0.468323889 | 0.999071534 | Rnf165        | Rnf165   | RNF165        | 5.614402683 | 3.379532531 | 5.318297407 | 2.636520049 | 7.259684337 | 5.966497245 | 5.75966112  | 3.937699786 | 7.464022234 | 3.92153787  |
| ENSMUSG00000035614  | 0.18436228   | 4.719692286  | 0.525857805 | 0.468353549 | 0.999071534 | Fam179b       | Fam179b  | FAM179B       | 20.07148959 | 24.9611087  | 29.48625651 | 20.88401407 | 32.24346287 | 31.86982675 | 26.40383974 | 25.90591965 | 30.32750087 | 18.69266385 |
| ENSMUSG00000029068  | 0.220343244  | 6.943916418  | 0.525543062 | 0.4684867   | 0.999071534 | Ccnl2         | Ccnl2    | CCNL2         | 120.2183975 | 94.9233611  | 140.1606988 | 109.2768178 | 125.3767106 | 83.74924791 | 67.62748169 | 181.8250147 | 116.9887274 | 173.070538  |
| ENSMUSG00000037214  | 0.283137354  | 2.506277175  | 0.525469437 | 0.468517855 | 0.999071534 | Thap1         | Thap1    | THAP1         | 5.684582717 | 4.98036373  | 4.510454763 | 4.301690606 | 6.605658721 | 4.875064822 | 4.335924663 | 5.941090906 | 7.621159544 | 5.751588876 |
| ENSMUSG00000032290  | -0.194030202 | 5.166729436  | 0.52546239  | 0.468520837 | 0.999071534 | Ptpn9         | Ptpn9    | PTPN9         | 43.44144076 | 54.30968068 | 32.4483462  | 29.14048475 | 39.89556257 | 62.57545891 | 32.09878557 | 33.71223677 | 16.89226085 | 23.33315033 |
| ENSMUSG00000015441  | -0.458723867 | 7.611971055  | 0.525404448 | 0.468545359 | 0.999071534 | Gzmf          | Gzmf     | GZMH          | 427.5367643 | 461.8694459 | 113.7038522 | 129.1201003 | 52.4528544  | 38.78223209 | 24.26823505 | 404.9613359 | 154.3088386 | 131.6329545 |
| ENSMUSG00000032436  | -0.183724192 | 5.632599299  | 0.525361229 | 0.468563651 | 0.999071534 | Cmtm7         | Cmtm7    | CMTM7         | 71.51345418 | 47.90635588 | 50.75944614 | 54.74248207 | 48.33249302 | 65.9952805  | 70.99267695 | 32.26150527 | 27.57759794 | 33.00627707 |
| ENSMUSG00000028970  | 0.154215869  | 5.899222558  | 0.525338756 | 0.468573163 | 0.999071534 | Abcb1b        | Abcb1b   | ABCB1         | 65.82887146 | 63.79608778 | 63.34832734 | 53.9792789  | 45.65098799 | 72.68939936 | 70.28080872 | 46.1470782  | 57.43368688 | 56.27406844 |
| ENSMUSG00000043263  | -0.352114083 | 3.28657721   | 0.525306458 | 0.468586834 | 0.999071534 | Pyhin1        | Pyhin1   |               | 17.96608859 | 14.22961066 | 7.674505119 | 9.505348597 | 6.801866406 | 18.48158903 | 13.78435751 | 2.141556024 | 2.435628308 | 6.993409202 |
| ENSMUSG00000076138  | 1.256242865  | 8.522780723  | 0.524709318 | 0.468839705 | 0.999071534 | Gm26377       | Gm26377  |               | 0           | 0           | 419.5396132 | 469.5780971 | 209.3535997 | 0           | 0           | 577.8056318 | 1051.877154 | 600.4528069 |
| ENSMUSG00000033256  | -0.204632093 | 4.07666711   | 0.524606312 | 0.468883347 | 0.999071534 | Shf           | Shf      | SHF           | 12.3516859  | 18.61707394 | 18.58038081 | 24.90817625 | 17.92030188 | 17.24463228 | 11.45460695 | 17.13244819 | 12.17814154 | 17.18940766 |
| ENSMUSG00000017801  | 0.19666335   | 5.308954889  | 0.524444792 | 0.468951794 | 0.999071534 | Mlx           | Mlx      | MLX           | 50.31908405 | 39.42787953 | 36.55487965 | 27.33654998 | 38.52210878 | 43.8755834  | 74.22844162 | 30.1890317  | 27.97044121 | 29.41153403 |
| ENSMUSG00000022801  | 0.158426139  | 4.99165604   | 0.524254753 | 0.469032347 | 0.999071534 | Lrch3         | Lrch3    | LRCH3         | 29.33525402 | 32.13520407 | 30.02481827 | 26.71211102 | 37.60647292 | 41.47443207 | 24.59181152 | 30.87985622 | 28.20614718 | 36.99317391 |

|                     |              |              |             |             |             |               |               |          |             |              |             |             |             |             |             |             |             |             |
|---------------------|--------------|--------------|-------------|-------------|-------------|---------------|---------------|----------|-------------|--------------|-------------|-------------|-------------|-------------|-------------|-------------|-------------|-------------|
| ENSMUSG00000039395  | 0.422700308  | 1.063353741  | 0.524222604 | 0.469045976 | 0.999071534 | Mreg          | Mreg          | MREG     | 2.38612114  | 2.786632087  | 0.605881983 | 1.734552664 | 1.177246109 | 1.309718907 | 2.135604685 | 4.214029596 | 1.492804447 | 1.503256184 |
| ENSMUSG000000081453 | -0.427803863 | 1.521390577  | 0.523745276 | 0.469248412 | 0.999071534 | Gm6767        | Gm6767        |          | 4.491522147 | 5.988294485  | 1.548365068 | 2.150845303 | 2.158284533 | 3.929156722 | 4.400639957 | 1.105319238 | 0.392843275 | 2.0261279   |
| ENSMUSG000000022314 | 0.184898583  | 8.180047751  | 0.523660026 | 0.469284581 | 0.999071534 | Rad21         | Rad21         | RAD21    | 255.9465823 | 277.5959879  | 278.03251   | 279.2629789 | 317.5948391 | 361.4824184 | 385.2501421 | 270.2505538 | 238.9272802 | 243.5275017 |
| ENSMUSG000000025577 | 0.276006622  | 2.746682876  | 0.523524096 | 0.469342262 | 0.999071534 | Cbx2          | Cbx2          | CBX2     | 4.280982046 | 8.715636528  | 4.375814322 | 4.995511672 | 8.633138131 | 9.968416129 | 6.147952881 | 7.668152216 | 3.771295445 | 8.104511599 |
| ENSMUSG000000096221 | 0.437537762  | 1.002128577  | 0.523421306 | 0.469385888 | 0.999071534 | 1500002C15Rik | 1500002C15Rik |          | 1.614140771 | 1.304380977  | 1.009803305 | 2.497755836 | 1.831271725 | 1.382481069 | 0.906014109 | 1.657978857 | 4.32127603  | 1.503256184 |
| ENSMUSG000000037852 | -0.202662608 | 9.103528339  | 0.523304658 | 0.469435403 | 0.999071534 | Cpe           | Cpe           | CPE      | 453.0822965 | 637.2493973  | 499.9199563 | 825.2307753 | 619.8854788 | 427.4049368 | 458.7667155 | 513.9734458 | 436.3703104 | 603.1325245 |
| ENSMUSG000000031617 | 0.182324761  | 5.053925417  | 0.523249632 | 0.469458764 | 0.999071534 | Tmem184c      | Tmem184c      | TMEM184C | 32.91443573 | 30.77153305  | 23.4947569  | 31.7770048  | 42.25005479 | 27.94067002 | 44.20054545 | 44.00552217 | 22.86347863 | 30.13048264 |
| ENSMUSG000000074529 | 0.990678985  | -0.461463788 | 0.52304564  | 0.469545382 | 0.999071534 | C330013J21Rik | C330013J21Rik | ZNF788   | 0           | 0.415030311  | 1.548365068 | 0           | 0.196207685 | 0           | 0.517722348 | 0.690824524 | 2.278490998 | 0           |
| ENSMUSG000000032042 | -0.21353891  | 6.176304112  | 0.522977236 | 0.469574434 | 0.999071534 | Srpr          | Srpr          | SRPRA    | 90.04098303 | 108.2636211  | 58.2319906  | 67.16187914 | 80.18354052 | 115.6918368 | 94.74318965 | 50.22294289 | 23.49202787 | 55.29368397 |
| ENSMUSG000000006310 | -0.468552395 | 0.477399871  | 0.522869187 | 0.469620328 | 0.999071534 | Zbtb32        | Zbtb32        | ZBTB32   | 1.754500839 | 1.126510844  | 2.01960661  | 1.873316877 | 0.784830739 | 1.528005392 | 0.711868228 | 0.967154334 | 1.571373102 | 0.261435858 |
| ENSMUSG000000030745 | -0.3158854   | 3.138335361  | 0.522731253 | 0.469678927 | 0.999071534 | Il21r         | Il21r         | IL21R    | 16.28176778 | 10.96865822  | 6.126140051 | 6.244389589 | 10.7260201  | 16.0804377  | 11.06631518 | 3.868617334 | 2.514196693 | 6.209101628 |
| ENSMUSG000000021981 | 0.183286722  | 5.266224239  | 0.522449679 | 0.469798585 | 0.999071534 | Cab39l        | Cab39l        | CAB39L   | 45.26612163 | 35.33686647  | 37.16076163 | 33.44217536 | 35.57899351 | 40.01918884 | 68.40406521 | 28.53105284 | 28.36328449 | 32.67948225 |
| ENSMUSG000000034898 | -0.536345054 | 0.479456597  | 0.522420202 | 0.469811115 | 0.999071534 | Filip1        | Filip1        | FILIP1   | 1.614140771 | 2.905212176  | 1.548365068 | 1.040731598 | 0.588623054 | 1.746291877 | 0.582437641 | 1.036236786 | 0           | 1.830051006 |
| ENSMUSG000000027223 | -0.246111075 | 3.209225362  | 0.522351491 | 0.469840323 | 0.999071534 | Mapk8ip1      | Mapk8ip1      | MAPK8IP1 | 9.12340436  | 11.50226861  | 6.664701814 | 12.21125075 | 11.70705853 | 12.51509178 | 7.24811287  | 7.875399573 | 7.542590889 | 5.555511983 |
| ENSMUSG000000048109 | 0.196094208  | 4.402722014  | 0.522312321 | 0.469856975 | 0.999071534 | Rbm15         | Rbm15         | RBM15    | 16.21158775 | 15.47470159  | 22.28299293 | 25.04694046 | 22.17146838 | 23.50217817 | 14.94923279 | 21.7609725  | 23.88487115 | 22.74491965 |
| ENSMUSG000000033769 | -0.206622863 | 4.547248504  | 0.522179536 | 0.469913432 | 0.999071534 | Exoc6b        | Exoc6b        | EXOC6B   | 25.89643238 | 36.16692709  | 19.5228639  | 19.56575405 | 28.7771271  | 39.00051858 | 17.861421   | 24.45518815 | 11.94243557 | 15.0979208  |
| ENSMUSG000000030852 | -0.171502041 | 4.668246509  | 0.522100068 | 0.469947225 | 0.999071534 | Tacc2         | Tacc2         | TACC2    | 31.30029496 | 33.49887509  | 26.92808814 | 20.74524986 | 27.14206306 | 33.25230782 | 18.12028217 | 19.96482874 | 21.29210553 | 23.26779136 |
| ENSMUSG000000063442 | -0.678199224 | -0.534035308 | 0.522061807 | 0.469963497 | 0.999071534 | Gm7117        | Gm7117        |          | 0.98252047  | 0.296450222  | 1.009803305 | 1.179495811 | 0.065402562 | 0.145524323 | 0.258861174 | 1.174401691 | 0.235705965 | 0.196076894 |
| ENSMUSG000000045659 | 0.647052967  | -0.334454262 | 0.521534339 | 0.470187909 | 0.999071534 | Plekha7       | Plekha7       | PLEKHA7  | 1.19306057  | 0.177870133  | 0.605881983 | 0           | 0.719428178 | 1.45524323  | 0.388291761 | 0.552659619 | 0.235705965 | 1.437897219 |
| ENSMUSG000000035133 | 0.227288818  | 4.627753561  | 0.521446471 | 0.470225531 | 0.999071534 | Arhgap5       | Arhgap5       | ARHGAP5  | 26.10697248 | 37.70846824  | 14.47384737 | 14.15394974 | 26.09562208 | 34.27097808 | 35.722842   | 21.96821986 | 23.41345922 | 13.52930565 |
| ENSMUSG000000004018 | 0.218725078  | 4.384863252  | 0.521413994 | 0.470239135 | 0.999071534 | Fanc1         | Fanc1         | FANCL    | 23.58049127 | 12.39161928  | 22.14835249 | 22.89609516 | 18.31271725 | 29.90524839 | 35.39926553 | 12.29667653 | 15.08518178 | 17.38548456 |
| ENSMUSG000000000567 | 0.26931784   | 6.715220598  | 0.521371065 | 0.47025741  | 0.999071534 | Sox9          | Sox9          | SOX9     | 57.61780754 | 85.3183739   | 114.7809757 | 111.2888989 | 123.3492312 | 65.63146969 | 37.08186316 | 143.2770063 | 155.5659371 | 123.8552377 |
| ENSMUSG000000035186 | -0.403174591 | 1.22322694   | 0.521359652 | 0.470262269 | 0.999071534 | Ubd           | Ubd           | UBD      | 4.912602348 | 2.312311732  | 2.01960661  | 1.457024238 | 2.419894779 | 2.473913492 | 0.582437641 | 1.381649048 | 1.571373102 | 3.202589261 |
| ENSMUSG000000033589 | 0.173555923  | 5.283541667  | 0.521128724 | 0.470360597 | 0.999071534 | Reep4         | Reep4         | REEP4    | 29.68615419 | 30.297211269 | 45.17186785 | 35.52363855 | 48.79031095 | 40.45576181 | 43.55339251 | 53.81523041 | 26.71334273 | 34.64025119 |
| ENSMUSG000000027475 | -0.260074521 | 4.766621913  | 0.521002385 | 0.470414406 | 0.999071534 | Kif3b         | Kif3b         | KIF3B    | 44.63450133 | 46.48339482  | 18.8496617  | 19.98204669 | 24.39515548 | 55.5902914  | 27.37456914 | 15.19813953 | 8.721120716 | 20.65343278 |
| ENSMUSG000000032815 | 0.253873136  | 3.870322732  | 0.520962761 | 0.470431284 | 0.999071534 | Fanca         | Fanca         | FANCA    | 18.17662869 | 7.470545595  | 15.887572   | 11.37866547 | 15.95822503 | 32.30639972 | 15.53167044 | 7.599069763 | 8.799689371 | 15.94758734 |
| ENSMUSG000000034252 | 0.168600165  | 5.93489389   | 0.520949939 | 0.470436746 | 0.999071534 | Senp6         | Senp6         | SEN6     | 42.24838019 | 62.66957694  | 66.8489788  | 57.72591265 | 68.67268968 | 69.12405345 | 42.51794782 | 77.9250063  | 56.49086302 | 64.11714418 |
| ENSMUSG000000020474 | 0.209792923  | 4.789303739  | 0.520723046 | 0.470533414 | 0.999071534 | Polm          | Polm          | POLM     | 36.70415754 | 29.28928194  | 24.77384109 | 14.15394974 | 28.71172454 | 23.57494033 | 19.73816451 | 40.41323465 | 21.5278115  | 35.88207151 |
| ENSMUSG000000023393 | 0.586957146  | 0.109812667  | 0.520620084 | 0.470577291 | 0.999071534 | Slc17a9       | Slc17a9       | SLC17A9  | 1.684320805 | 0.415030311  | 1.279084186 | 0           | 0.588623054 | 1.236956746 | 1.229590576 | 1.381649048 | 0.31427462  | 1.437897219 |
| ENSMUSG000000060657 | 0.158652263  | 5.837520591  | 0.52059406  | 0.470588383 | 0.999071534 | Marf1         | Marf1         | KIAA0430 | 62.17950972 | 70.85160307  | 47.79735644 | 40.79667865 | 59.64713618 | 78.00103715 | 42.58266311 | 66.52640166 | 48.79113482 | 56.79694015 |
| ENSMUSG000000024678 | 0.444934739  | 0.458475576  | 0.520471183 | 0.470640758 | 0.999071534 | Ms4a4d        | Ms4a4d        |          | 1.263240604 | 0.948640711  | 1.750325729 | 0.485674746 | 1.046440986 | 1.236956746 | 2.265035272 | 1.4507315   | 1.257098482 | 0.65389645  |
| ENSMUSG000000020525 | 0.2038373    | 3.659100368  | 0.520429374 | 0.470658581 | 0.999071534 | Ppm1d         | Ppm1d         | PPM1D    | 10.6673651  | 13.7552903   | 12.5888812  | 10.89299073 | 12.4264867  | 15.06176744 | 10.8721693  | 15.19813953 | 11.70672961 | 11.63389568 |
| ENSMUSG000000026938 | 0.418323558  | 3.436585841  | 0.520069988 | 0.470811829 | 0.999071534 | Fcna          | Fcna          |          | 8.140883891 | 5.395394041  | 11.71371834 | 14.98653501 | 6.671061283 | 14.04309717 | 29.70431971 | 12.22759407 | 0.628549241 | 5.032640267 |
| ENSMUSG000000059436 | -0.165601278 | 6.183059106  | 0.519919256 | 0.470876127 | 0.999071534 | Max           | Max           | MAX      | 62.81113002 | 58.81572405  | 94.38294892 | 96.30236389 | 83.7806814  | 91.31651271 | 63.03269585 | 62.86503168 | 45.33411399 | 73.4634761  |
| ENSMUSG000000029430 | 0.24078934   | 9.765633426  | 0.519841753 | 0.470909194 | 0.999071534 | Ran           | Ran           | RAN      | 1201.201454 | 570.3702272  | 777.885146  | 861.1707065 | 729.95799   | 1020.416553 | 1732.557837 | 483.3699194 | 617.2353544 | 759.5365265 |
| ENSMUSG000000087501 | 0.530107898  | 0.839279262  | 0.519831616 | 0.470913519 | 0.999071534 | Gm12116       | Gm12116       |          | 0.280720134 | 0.652190488  | 2.086926831 | 2.705902155 | 1.24264867  | 1.382481069 | 0.19414588  | 2.832380548 | 2.907040239 | 1.764692042 |
| ENSMUSG000000030695 | -0.254049774 | 10.52350488  | 0.5197745   | 0.47093789  | 0.999071534 | Aldoa         | Aldoa         | ALDOA    | 1170.8135   | 2239.384977  | 1500.702352 | 1295.225165 | 2137.617323 | 744.9390097 | 818.5190319 | 2266.111686 | 948.2450984 | 1570.641276 |
| ENSMUSG000000021572 | 0.41146281   | 1.32788251   | 0.519760042 | 0.470944059 | 0.999071534 | Cep72         | Cep72         | CEP72    | 0.701800335 | 2.075151554  | 1.615685288 | 3.399723221 | 2.681505025 | 3.128772945 | 1.553167044 | 4.075864691 | 0.785686551 | 3.856178906 |
| ENSMUSG000000026068 | 0.195433089  | 4.350290595  | 0.519283774 | 0.471147364 | 0.999071534 | Il18rap       | Il18rap       | IL18RAP  | 27.22985301 | 19.15068434  | 16.89737531 | 19.77390037 | 15.04258917 | 27.28581057 | 28.86302089 | 14.57639746 | 17.83508471 | 16.86261284 |

|                     |              |              |             |             |             |               |               |          |             |             |             |             |             |             |             |             |             |             |
|---------------------|--------------|--------------|-------------|-------------|-------------|---------------|---------------|----------|-------------|-------------|-------------|-------------|-------------|-------------|-------------|-------------|-------------|-------------|
| ENSMUSG00000024787  | -0.187670621 | 5.36637055   | 0.519108741 | 0.471222115 | 0.999071534 | Snx15         | Snx15         | SNX15    | 38.17793825 | 31.18656336 | 59.9149961  | 52.10596202 | 44.86615725 | 37.47251318 | 24.13880447 | 36.75186467 | 35.35589479 | 50.06496681 |
| ENSMUSG000000083429 | -0.55646606  | 0.324474698  | 0.519039477 | 0.471251701 | 0.999071534 | Gm15198       | Gm15198       |          | 2.526481208 | 0.355740266 | 1.211763966 | 2.289609516 | 0.457817931 | 0.654859454 | 1.164875283 | 0.483577167 | 0.15713731  | 1.960768935 |
| ENSMUSG000000029152 | 0.174364259  | 6.903315974  | 0.519016142 | 0.47126167  | 0.999071534 | Ociad1        | Ociad1        | OCIAD1   | 110.2528327 | 122.9675521 | 120.0319529 | 96.71865653 | 134.860082  | 120.7851881 | 181.7205441 | 125.0392388 | 77.07585065 | 111.5677524 |
| ENSMUSG000000078713 | 0.243824675  | 6.308894192  | 0.518824093 | 0.471343722 | 0.999071534 | Tomm5         | Tomm5         | TOMM5    | 111.2353532 | 62.90673712 | 65.77185527 | 73.33688662 | 63.37508219 | 82.94886414 | 186.3800452 | 39.99873994 | 46.59121247 | 64.90145175 |
| ENSMUSG000000020186 | 0.199574546  | 7.208923077  | 0.518762835 | 0.471369899 | 0.999071534 | Csrp2         | Csrp2         | CSRP2    | 160.5017367 | 134.4105307 | 140.228019  | 131.3403277 | 148.7908276 | 85.20449114 | 166.3830195 | 158.2678984 | 160.2800564 | 168.7568464 |
| ENSMUSG000000037621 | -0.693106088 | -0.3608338   | 0.518754221 | 0.47137358  | 0.999071534 | Atoh8         | Atoh8         | ATOH8    | 0.421080201 | 0.5336104   | 1.750325729 | 1.040731598 | 0.39241537  | 0.800383777 | 0.064715293 | 0.345412262 | 1.099961171 | 0           |
| ENSMUSG000000037313 | 0.196173343  | 6.401944054  | 0.5187467   | 0.471376794 | 0.999071534 | Tacc3         | Tacc3         | TACC3    | 110.1826527 | 48.14351606 | 85.42935961 | 77.22228459 | 88.16265303 | 138.3936312 | 114.4813542 | 47.11423253 | 65.21198373 | 81.50262874 |
| ENSMUSG000000062456 | 0.955785975  | -0.602607884 | 0.518673817 | 0.471407943 | 0.999071534 | Rpl9-ps6      | Rpl9-ps6      |          | 1.052700503 | 0.415030311 | 0           | 0           | 0.39241537  | 0           | 2.523896446 | 0.414494714 | 0           | 0.392153787 |
| ENSMUSG000000048796 | -0.366252084 | 2.467697824  | 0.518597394 | 0.471440608 | 0.999071534 | Cyb561d1      | Cyb561d1      | CYB561D1 | 8.632144126 | 5.632554219 | 4.443134543 | 7.285121188 | 5.493815174 | 8.440410737 | 3.818202315 | 3.45412262  | 0.471411931 | 7.97379367  |
| ENSMUSG000000024457 | 0.158858722  | 4.832131341  | 0.518362411 | 0.471541068 | 0.999071534 | Trim26        | Trim26        | TRIM26   | 33.12497583 | 26.20619963 | 27.73593078 | 22.96547727 | 29.49655528 | 40.16471316 | 25.49782563 | 25.28417758 | 22.70634132 | 32.74484122 |
| ENSMUSG000000047466 | -0.40894338  | 2.618109687  | 0.518290217 | 0.471571939 | 0.999071534 | 8030462N17Rik | 8030462N17Rik | C18orf25 | 7.789983723 | 12.92522968 | 3.298690797 | 4.371072713 | 7.39048946  | 11.42365936 | 7.44225875  | 5.941090906 | 0.707117896 | 1.241820326 |
| ENSMUSG000000030532 | 0.23577227   | 3.297047016  | 0.517898307 | 0.471739584 | 0.999071534 | Hddc3         | Hddc3         | HDDC3    | 9.263764428 | 8.47847635  | 9.626791509 | 9.297202278 | 9.548773993 | 8.658697221 | 14.04321869 | 8.911636359 | 6.049786443 | 13.13715187 |
| ENSMUSG000000037523 | -0.255688549 | 4.137309062  | 0.51765699  | 0.471842858 | 0.999071534 | Mavs          | Mavs          | MAVS     | 21.5452703  | 28.28135118 | 13.46404407 | 8.950291745 | 27.53447843 | 30.77839432 | 16.24353866 | 12.78025369 | 5.892649132 | 15.49007459 |
| ENSMUSG000000025236 | 0.168523844  | 4.718998921  | 0.517288635 | 0.47200057  | 0.999071534 | Adpgk         | Adpgk         | ADPGK    | 25.82625234 | 25.31684896 | 26.7934477  | 26.15705417 | 23.87193498 | 37.83632399 | 35.46398083 | 21.6228076  | 19.32788915 | 22.15668897 |
| ENSMUSG000000041977 | -0.215434404 | 4.439968852  | 0.516796443 | 0.472211437 | 0.999071534 | Arhgef11      | Arhgef11      | ARHGEF11 | 26.45787265 | 34.7936602  | 16.02221244 | 15.54159187 | 28.45011429 | 33.03402133 | 15.20809397 | 24.93876531 | 10.44963113 | 16.07830527 |
| ENSMUSG000000020871 | -0.336540434 | 1.835187818  | 0.516781893 | 0.472217672 | 0.999071534 | Dlx4          | Dlx4          | DLX4     | 5.052962415 | 3.675982753 | 5.520258068 | 1.734552664 | 4.054958819 | 5.893735083 | 2.847472913 | 1.865226215 | 1.964216377 | 2.679717545 |
| ENSMUSG000000090053 | -0.607201177 | 0.111591022  | 0.516762326 | 0.472226059 | 0.999071534 | Palm2         | Palm2         | PALM2    | 0.912340436 | 2.490181865 | 0.538561763 | 1.387642131 | 0.523220493 | 1.091432423 | 0.19414588  | 1.588896405 | 0           | 0.849666539 |
| ENSMUSG000000018750 | 0.215035609  | 5.405133169  | 0.516633302 | 0.472281363 | 0.999071534 | Zbtb4         | Zbtb4         | ZBTB4    | 27.01931291 | 50.8708581  | 40.39213221 | 35.38487434 | 49.57514169 | 37.03594021 | 19.8028798  | 53.05532344 | 51.46246909 | 51.43750507 |
| ENSMUSG000000057322 | 0.26521925   | 8.868733781  | 0.516610294 | 0.472291227 | 0.999071534 | Rpl38         | Rpl38         | RPL38    | 501.6468798 | 274.2164554 | 489.2160412 | 611.3257408 | 309.0271035 | 260.2702518 | 365.9649846 | 388.3124649 | 718.1960762 | 601.4331914 |
| ENSMUSG000000032127 | -0.180312478 | 5.083932468  | 0.516480688 | 0.472346793 | 0.999071534 | Vps11         | Vps11         | VP511    | 28.14219345 | 47.96564593 | 34.80455392 | 38.22954071 | 36.88704474 | 36.3083186  | 18.37914335 | 37.92626636 | 24.12057712 | 36.66637909 |
| ENSMUSG000000033565 | -0.164814627 | 6.95396022   | 0.516283834 | 0.472431212 | 0.999071534 | Rbfox2        | Rbfox2        | RBFOX2   | 131.1664827 | 178.8187739 | 116.1947003 | 114.61924   | 140.6155074 | 170.6272688 | 104.6446296 | 103.5545961 | 87.76118774 | 107.7115735 |
| ENSMUSG000000085913 | -0.607248991 | -0.172700806 | 0.516108082 | 0.472506602 | 0.999071534 | Gm15601       | Gm15601       |          | 1.754500839 | 0.652190488 | 0.336601102 | 1.665170557 | 0.261610246 | 0.291048646 | 0.647152935 | 0.552659619 | 0.078568655 | 1.30717929  |
| ENSMUSG000000029710 | -0.222266668 | 5.60454247   | 0.515758108 | 0.472656783 | 0.999071534 | Ephb4         | Ephb4         | EPHB4    | 57.7581676  | 96.76135247 | 31.64050356 | 34.69105327 | 52.32204928 | 68.25090751 | 56.04344415 | 50.08477799 | 19.56359512 | 30.13048264 |
| ENSMUSG000000093671 | -0.288627513 | 3.594773877  | 0.515754419 | 0.472658366 | 0.999071534 | Gm20656       | Gm20656       |          | 11.15862533 | 4.624623464 | 19.05162236 | 20.05142879 | 12.62269439 | 8.731459383 | 6.665675228 | 8.980718811 | 12.33527885 | 13.85610048 |
| ENSMUSG000000023018 | 0.175231624  | 4.340184225  | 0.515515054 | 0.472761128 | 0.999071534 | Smarcd1       | Smarcd1       | SMARCD1  | 20.21184966 | 20.51435536 | 19.65750434 | 16.23541293 | 21.77905301 | 32.23363755 | 15.79053161 | 19.41216912 | 15.87086833 | 21.82989414 |
| ENSMUSG000000038274 | 0.228113717  | 7.637199913  | 0.515257827 | 0.472871598 | 0.999071534 | Fau           | Fau           | FAU      | 179.5205258 | 190.8546529 | 213.0011772 | 202.4569869 | 162.8523784 | 105.5051342 | 174.7960077 | 202.6188329 | 278.9972943 | 224.1812483 |
| ENSMUSG000000043441 | 0.162994081  | 6.015359599  | 0.514910391 | 0.473020877 | 0.999071534 | Gpr149        | Gpr149        | GPRI49   | 52.63502516 | 56.26625214 | 51.02872702 | 74.1694719  | 81.42618919 | 86.15039924 | 83.41801329 | 52.50266382 | 50.9124885  | 60.3916832  |
| ENSMUSG000000038982 | -0.204539035 | 4.026568446  | 0.514820786 | 0.473059388 | 0.999071534 | Bloc1s5       | Bloc1s5       | BLOC1S5  | 21.40491023 | 16.83837261 | 14.27188671 | 20.25957511 | 16.93926345 | 16.00767553 | 22.65035272 | 11.12227484 | 10.68533709 | 12.54892118 |
| ENSMUSG000000000711 | -0.182713052 | 6.462915077  | 0.514703868 | 0.473109647 | 0.999071534 | Rab5b         | Rab5b         | RAB5B    | 102.8839292 | 131.5646085 | 58.16467038 | 75.55711403 | 120.7331287 | 84.18582088 | 106.1330813 | 88.21829171 | 54.99805857 | 66.92757965 |
| ENSMUSG000000004359 | -0.506367448 | 0.473647517  | 0.514643438 | 0.473135627 | 0.999071534 | Spic          | Spic          | SPIC     | 2.035220973 | 1.126510844 | 1.817645949 | 1.942698983 | 0.654025616 | 1.164194584 | 1.29430587  | 1.312566595 | 0           | 1.372538255 |
| ENSMUSG000000025597 | 0.458775406  | 1.186834792  | 0.514635425 | 0.473139072 | 0.999071534 | Klh4          | Klh4          | KLHL4    | 3.36864161  | 2.845922132 | 0.807842644 | 0.693821065 | 1.765869163 | 2.983248622 | 5.112508185 | 0.483577167 | 2.199922343 | 1.30717929  |
| ENSMUSG000000043290 | -0.8044549   | -0.216364998 | 0.514603814 | 0.473152663 | 0.999071534 | Zfp784        | Zfp784        | ZNF784   | 1.684320805 | 0.770770577 | 0.673202203 | 1.665170557 | 0           | 1.018670261 | 0           | 0.483577167 | 1.021392516 | 0           |
| ENSMUSG000000027774 | 0.180651904  | 5.429556307  | 0.514480713 | 0.473205596 | 0.999071534 | Gfm1          | Gfm1          | GFM1     | 51.30160452 | 40.96942069 | 37.02612119 | 33.51155746 | 47.22064947 | 70.21548587 | 64.45643231 | 28.25472303 | 26.79191139 | 37.90819941 |
| ENSMUSG000000036882 | 0.51138531   | 1.052691145  | 0.51409104  | 0.473373219 | 0.999071534 | Arhgap33      | Arhgap33      | ARHGAP33 | 1.614140771 | 2.371601776 | 1.95228639  | 0           | 2.485297341 | 2.328389169 | 0.647152935 | 3.039627905 | 1.335667137 | 3.725460977 |
| ENSMUSG000000024613 | 0.23462798   | 5.944378823  | 0.51404887  | 0.473391364 | 0.999071534 | Tc of1        | Tc of1        | TCOF1    | 42.31856023 | 32.3130742  | 90.81497724 | 59.66861163 | 67.1030282  | 79.89285335 | 28.60415972 | 46.42340801 | 78.96149837 | 82.48301321 |
| ENSMUSG000000005501 | 0.192220385  | 4.240586927  | 0.514018973 | 0.47340423  | 0.999071534 | Usp40         | Usp40         | USP40    | 18.59770889 | 22.8266671  | 16.69541464 | 13.04383603 | 20.20939153 | 20.44616739 | 17.66727512 | 14.30006765 | 17.36367278 | 26.60109855 |
| ENSMUSG000000036555 | 0.193380337  | 4.319656079  | 0.51391625  | 0.473448438 | 0.999071534 | lqce          | lqce          | IQCE     | 22.8085109  | 20.04003501 | 14.94508892 | 13.52951078 | 25.3761939  | 21.173789   | 14.81980221 | 20.72473572 | 18.5422026  | 26.27430373 |
| ENSMUSG000000020674 | -0.179401589 | 6.898986541  | 0.513761487 | 0.473515055 | 0.999071534 | Pxdn          | Pxdn          | PXDN     | 122.8852387 | 182.6133368 | 129.860705  | 112.5377768 | 110.2033163 | 179.2132038 | 128.7187187 | 77.57959404 | 77.46869393 | 92.48293477 |
| ENSMUSG000000061130 | -0.146528293 | 5.931786515  | 0.513585361 | 0.473590886 | 0.999071534 | Ppm1b         | Ppm1b         | PPM1B    | 57.5476275  | 62.37312672 | 75.33132656 | 67.50878967 | 68.99970248 | 76.98236689 | 52.22524184 | 60.30898094 | 43.2127603  | 49.93424888 |

|                     |              |             |             |             |             |               |          |             |             |             |             |             |             |             |             |             |             |             |
|---------------------|--------------|-------------|-------------|-------------|-------------|---------------|----------|-------------|-------------|-------------|-------------|-------------|-------------|-------------|-------------|-------------|-------------|-------------|
| ENSMUSG00000036167  | 0.151668881  | 5.8213739   | 0.513557018 | 0.473603091 | 0.999071534 | Pphln1        | Pphln1   | PHLN1       | 57.26690737 | 50.27795766 | 61.32872073 | 52.66101887 | 55.91919016 | 82.22124252 | 51.12508185 | 44.6963467  | 59.00505998 | 50.78391542 |
| ENSMUSG00000033540  | -0.237470778 | 3.359620893 | 0.513474195 | 0.473638759 | 0.999071534 | Idua          | Idua     | IDUA        | 12.63240604 | 13.10309981 | 8.616988204 | 9.713494917 | 13.01510976 | 8.367648575 | 5.565515239 | 11.26043974 | 7.542590889 | 11.76461361 |
| ENSMUSG00000033107  | -0.529911451 | 0.36657979  | 0.513211514 | 0.473751911 | 0.999071534 | Rnf125        | Rnf125   | RNF125      | 1.684320805 | 2.193731643 | 0.807842644 | 1.873316877 | 0.457817931 | 2.110102684 | 1.48845175  | 0.138164905 | 0.707117896 | 0.326794823 |
| ENSMUSG00000050846  | -0.233604008 | 3.506914036 | 0.513079457 | 0.473808813 | 0.999071534 | Zfp623        | Zfp623   | ZNF623      | 8.351423991 | 13.93316044 | 11.2424768  | 13.8070392  | 15.56580966 | 16.29872418 | 8.607134033 | 10.98410993 | 8.406846095 | 6.470537486 |
| ENSMUSG00000043419  | 0.250203701  | 3.16863012  | 0.513024785 | 0.473832373 | 0.999071534 | A030009H04Rik | Chd3os   | AC025335.1  | 6.947823321 | 5.988294485 | 8.751628644 | 10.75422652 | 9.352566308 | 7.348978314 | 8.348272859 | 9.740625788 | 9.978219197 | 9.999921569 |
| ENSMUSG00000026339  | -0.20949511  | 4.360473081 | 0.513018206 | 0.473835209 | 0.999071534 | Ccdc93        | Ccdc93   | CCDC93      | 19.51004932 | 25.85045936 | 27.26468924 | 17.13738032 | 24.19894779 | 35.14412402 | 19.28515746 | 19.68849893 | 7.85686551  | 13.92145944 |
| ENSMUSG00000009079  | 0.197976709  | 7.662774786 | 0.513001988 | 0.473842198 | 0.999071534 | Ewsr1         | Ewsr1    | EWSR1       | 161.203537  | 156.1106869 | 247.1998491 | 182.1974118 | 232.4407039 | 245.1357222 | 126.3889682 | 227.2812684 | 181.0221813 | 264.5077294 |
| ENSMUSG00000028980  | -0.157717624 | 5.232128697 | 0.51295656  | 0.473861777 | 0.999071534 | H6pd          | H6pd     | H6PD        | 34.9496567  | 53.24245988 | 39.51696934 | 34.06661432 | 43.75431371 | 48.89617254 | 35.85227259 | 34.95572091 | 21.76351746 | 33.20235397 |
| ENSMUSG00000034321  | 0.199765398  | 4.392384758 | 0.512861302 | 0.473902837 | 0.999071534 | Exosc1        | Exosc1   | EXOSC1      | 22.3874307  | 12.80664959 | 24.5045602  | 22.89609516 | 17.92030188 | 31.86982675 | 27.30985385 | 12.98750105 | 16.9708295  | 20.65343278 |
| ENSMUSG00000030142  | -0.360738605 | 3.333401534 | 0.512559269 | 0.474033062 | 0.999071534 | Clec4e        | Clec4e   | CLEC4E      | 25.61571224 | 18.0241735  | 5.654898509 | 4.717983245 | 4.708984435 | 8.003837767 | 17.861421   | 6.493750525 | 3.69272679  | 6.666614379 |
| ENSMUSG00000073563  | 0.154113975  | 5.591691591 | 0.511988779 | 0.474279194 | 0.999071534 | Csnk1g3       | Csnk1g3  | CSNK1G3     | 40.56405939 | 46.30552468 | 54.73133914 | 48.7756209  | 45.38937775 | 59.51944813 | 48.01874776 | 39.79149258 | 52.87670488 | 42.74476279 |
| ENSMUSG00000022003  | -0.460964843 | 3.773128194 | 0.511937948 | 0.474301135 | 0.999071534 | Slc25a30      | Slc25a30 | SLC25A30    | 25.12445201 | 30.23792265 | 4.173853661 | 4.093544286 | 19.03214542 | 24.73913492 | 20.57946333 | 8.773471454 | 0.471411931 | 5.032640267 |
| ENSMUSG00000083327  | -0.964250751 | 0.462581405 | 0.511488597 | 0.474495163 | 0.999071534 | Vcp-rs        | Vcp-rs   |             | 0           | 7.885575906 | 0           | 0           | 0.588623054 | 1.528005392 | 0.453007054 | 0           | 0.31427462  | 1.895409971 |
| ENSMUSG000000091542 | -0.388343654 | 1.5264697   | 0.511487121 | 0.474495801 | 0.999071534 | Gm17167       | Gm17167  |             | 2.035220973 | 3.083082309 | 4.443134543 | 4.162926393 | 2.289089656 | 2.40115133  | 2.78275762  | 3.246875263 | 0.31427462  | 3.006512367 |
| ENSMUSG00000073889  | -0.169921073 | 5.036592788 | 0.511282888 | 0.474584031 | 0.999071534 | Il11ra1       | Il11ra1  | IL11RA      | 45.4064817  | 33.61745518 | 32.78494731 | 32.81777364 | 35.44818839 | 41.91100504 | 41.41778783 | 23.211704   | 16.89226085 | 29.01938024 |
| ENSMUSG000000098374 | -0.341482469 | 3.402907082 | 0.511004277 | 0.474704435 | 0.999071534 | RNF8          | Gm28043  | RNF8        | 9.965564763 | 24.19033812 | 6.597381593 | 6.452535909 | 13.86534306 | 24.88465924 | 6.018522294 | 6.079255811 | 2.435628308 | 9.084896066 |
| ENSMUSG00000000168  | 0.139321552  | 5.749552978 | 0.510971768 | 0.474718487 | 0.999071534 | Dlat          | Dlat     | DLAT        | 49.89800385 | 56.56270236 | 50.82676636 | 47.73488931 | 60.56277204 | 65.77699402 | 56.04344415 | 59.13457925 | 42.03423048 | 50.39176163 |
| ENSMUSG00000059901  | 0.173764134  | 6.233777467 | 0.510850148 | 0.474771065 | 0.999071534 | Adamts14      | Adamts14 | ADAMTS14    | 99.65564763 | 58.3414037  | 70.95551224 | 74.10008979 | 63.44048475 | 121.4400476 | 60.5735147  | 51.53550949 | 65.99767028 | 92.09078099 |
| ENSMUSG000000062609 | -0.546397811 | 0.441282534 | 0.510770717 | 0.474805409 | 0.999071534 | Kcnj15        | Kcnj15   | KCNJ15      | 3.087921476 | 1.719411288 | 0.740522424 | 0.971349492 | 1.046440986 | 2.110102684 | 1.48845175  | 0           | 0.471411931 | 0.980384468 |
| ENSMUSG00000022999  | 0.217909158  | 4.939370592 | 0.510634205 | 0.474864442 | 0.999071534 | Lmbr1l        | Lmbr1l   | LMBR1L      | 28.98435385 | 26.62122994 | 35.81435722 | 24.97755836 | 30.41219114 | 21.68312413 | 15.01394809 | 44.8345116  | 28.91326508 | 44.50945483 |
| ENSMUSG00000072774  | 0.393225367  | 1.005253755 | 0.510458477 | 0.474940452 | 0.999071534 | Zfp951        | Zfp951   | ZNF788      | 0.912340436 | 2.193731643 | 2.288887492 | 1.80393477  | 1.177246109 | 2.037340523 | 0.970729402 | 1.72706131  | 2.278490998 | 3.137230296 |
| ENSMUSG00000051403  | -0.17090431  | 4.986678053 | 0.509945424 | 0.475162483 | 0.999071534 | Ppp1r37       | Ppp1r37  | PPP1R37     | 36.07253724 | 36.34479722 | 37.29540207 | 27.68346051 | 36.69083706 | 38.85499425 | 17.40841395 | 36.47553486 | 21.37067419 | 30.91479021 |
| ENSMUSG00000043633  | 0.353942142  | 1.745104578 | 0.50983782  | 0.475209071 | 0.999071534 | Fam221b       | Fam221b  | FAM221B     | 3.017741442 | 2.786632087 | 4.106533441 | 2.081463196 | 2.746907587 | 2.255627007 | 2.135604685 | 4.075864691 | 5.578374512 | 2.548999616 |
| ENSMUSG00000033313  | -0.269534936 | 3.265897297 | 0.50960724  | 0.475308928 | 0.999071534 | Fbxl8         | Fbxl8    | RP11-5A19.5 | 5.75476275  | 13.10309981 | 8.886269085 | 10.47669809 | 15.63121222 | 9.677367482 | 5.306654065 | 11.26043974 | 4.399844685 | 11.43781879 |
| ENSMUSG00000050621  | 0.20253181   | 9.288584541 | 0.509413577 | 0.475392824 | 0.999071534 | Gm9846        | Rps27rt  | RPS27       | 644.393068  | 628.0594404 | 565.9610924 | 651.15107   | 522.8280774 | 414.0894612 | 843.0461282 | 674.3829003 | 581.4866164 | 650.9099275 |
| ENSMUSG00000066637  | 0.266889707  | 3.427327842 | 0.509342394 | 0.475423668 | 0.999071534 | Ttc32         | Ttc32    | TTC32       | 11.57970553 | 4.328173242 | 11.64639812 | 10.40731598 | 12.0994739  | 11.93299449 | 18.96158099 | 8.704389002 | 9.428238612 | 7.058768167 |
| ENSMUSG00000026781  | -0.154584724 | 5.326203906 | 0.509048084 | 0.475551224 | 0.999071534 | Acbd5         | Acbd5    | ACBD5       | 34.3180364  | 48.38067624 | 40.72873331 | 40.72729654 | 54.74194406 | 42.49310233 | 37.6643008  | 41.17314163 | 31.11318742 | 30.39191849 |
| ENSMUSG00000026696  | 0.166297593  | 5.351002115 | 0.508934335 | 0.475600532 | 0.999071534 | Vamp4         | Vamp4    | VAMP4       | 45.1959416  | 39.96148993 | 38.30520537 | 34.27476064 | 41.7268343  | 30.48734568 | 52.35467242 | 41.03497672 | 40.777132   | 38.82322492 |
| ENSMUSG00000025648  | 0.22136678   | 3.310639619 | 0.508352641 | 0.475852856 | 0.999071534 | Pfkfb4        | Pfkfb4   | PFKFB4      | 9.263764428 | 10.67220799 | 6.866662475 | 8.464616999 | 11.77246109 | 13.31547556 | 9.319002261 | 10.08603805 | 9.506807267 | 8.823460208 |
| ENSMUSG00000026270  | 0.189421652  | 3.953764385 | 0.508235141 | 0.47590385  | 0.999071534 | Capn10        | Capn10   | CAPN10      | 17.12392818 | 12.80664959 | 16.5607742  | 13.32136446 | 14.78097892 | 19.93683226 | 13.97850339 | 13.47107822 | 16.18514295 | 15.29399769 |
| ENSMUSG00000041837  | 0.238499174  | 3.49355248  | 0.508168877 | 0.475932611 | 0.999071534 | Pdcd7         | Pdcd7    | PDCD7       | 10.0357448  | 10.5536279  | 7.539864678 | 13.8070392  | 10.85682522 | 20.2278809  | 8.412988152 | 11.19135729 | 6.206923753 | 14.31361323 |
| ENSMUSG00000021576  | 0.190023007  | 7.294623739 | 0.508156312 | 0.475938066 | 0.999071534 | Pdcd6         | Pdcd6    | PDCD6       | 170.5374815 | 115.8527468 | 150.4606925 | 176.9243717 | 144.6050637 | 130.171507  | 227.7331178 | 139.7538012 | 146.5305418 | 152.2863873 |
| ENSMUSG00000025007  | -0.163726024 | 5.280801988 | 0.507929782 | 0.476036414 | 0.999071534 | Aldh18a1      | Aldh18a1 | ALDH18A1    | 37.61649798 | 54.01323045 | 50.69212592 | 28.16913526 | 42.90408041 | 51.15179955 | 29.51017383 | 38.75525579 | 26.00622484 | 33.98666154 |
| ENSMUSG000000001175 | 0.189371747  | 10.11655368 | 0.507924632 | 0.47603865  | 0.999071534 | Calm1         | Calm1    | CALM1       | 1244.783255 | 941.4073251 | 1072.47843  | 1088.605252 | 1034.930135 | 1310.81034  | 1366.786998 | 806.2613019 | 1177.979846 | 1014.240411 |
| ENSMUSG00000029005  | 0.586018672  | 0.268558146 | 0.507764069 | 0.476108379 | 0.999071534 | Draxin        | Draxin   | DRAXIN      | 0.912340436 | 1.067220799 | 0.471241542 | 1.179495811 | 0.784830739 | 3.128772945 | 1.941458804 | 0           | 1.099961171 | 0.392153787 |
| ENSMUSG00000038351  | -0.200667658 | 4.017355751 | 0.507609037 | 0.476175721 | 0.999071534 | Sgsn2         | Sgsn2    | SGSM2       | 18.59770889 | 22.58950692 | 14.20456649 | 15.19468133 | 18.83593774 | 22.62903223 | 10.22501637 | 14.02373784 | 9.192532646 | 17.97371524 |
| ENSMUSG00000051721  | 0.577737668  | 0.497527839 | 0.507458142 | 0.476241282 | 0.999071534 | BC068281      | BC068281 | WDCP        | 1.333420637 | 2.727342043 | 0           | 0.138764213 | 1.177246109 | 2.837724299 | 1.100159989 | 1.381649048 | 1.021392516 | 1.30717929  |
| ENSMUSG00000013275  | -0.188741309 | 4.506048945 | 0.507399642 | 0.476266703 | 0.999071534 | Slc41a1       | Slc41a1  | SLC41A1     | 23.2295911  | 36.34479722 | 19.65750434 | 16.44355925 | 30.01977577 | 26.92199976 | 17.79670571 | 25.07693022 | 14.29949523 | 19.1501766  |
| ENSMUSG00000003452  | 0.366212822  | 1.90623517  | 0.507029535 | 0.476427582 | 0.999071534 | Bicd1         | Bicd1    | BICD1       | 3.298461576 | 1.541541155 | 4.577774983 | 5.064893778 | 1.765869163 | 3.128772945 | 2.329750565 | 2.694215643 | 5.342668547 | 5.555511983 |

|                     |              |              |             |             |             |               |               |          |             |             |             |             |             |             |             |             |             |             |
|---------------------|--------------|--------------|-------------|-------------|-------------|---------------|---------------|----------|-------------|-------------|-------------|-------------|-------------|-------------|-------------|-------------|-------------|-------------|
| ENSMUSG00000010554  | 0.214839276  | 4.781089252  | 0.506954544 | 0.476460191 | 0.999071534 | Mettl16       | Mettl16       | METTL16  | 37.61649798 | 29.05212176 | 23.62939734 | 12.28063286 | 30.28138602 | 49.69655632 | 38.24673845 | 18.7213446  | 18.38506529 | 22.02597104 |
| ENSMUSG00000036040  | -0.543582334 | -0.085553646 | 0.506954198 | 0.476460341 | 0.999071534 | Adamtsl2      | Adamtsl2      | ADAMTSL2 | 0.631620302 | 0.652190488 | 1.481044848 | 1.873316877 | 0.261610246 | 1.382481069 | 0.323576467 | 0.483577167 | 0.628549241 | 0.457512752 |
| ENSMUSG000000061079 | 0.209791444  | 3.728591133  | 0.506479924 | 0.476666653 | 0.999071534 | Zfp143        | Zfp143        | ZNF143   | 9.755024662 | 14.34819075 | 9.82875217  | 13.18260024 | 16.02362759 | 16.00767553 | 10.35444696 | 13.33291331 | 14.45663254 | 13.26786979 |
| ENSMUSG00000036249  | -0.255031562 | 4.015173392  | 0.506245814 | 0.476768546 | 0.999071534 | Rbm43         | Rbm43         | RBM43    | 26.17715251 | 17.72772328 | 15.01240914 | 12.76630761 | 19.48996336 | 21.7558863  | 25.04481858 | 6.63191543  | 5.656943167 | 14.44433116 |
| ENSMUSG00000037029  | -0.318643015 | 3.956505266  | 0.506181232 | 0.476796661 | 0.999071534 | Zfp146        | Zfp146        | ZNF146   | 19.01878909 | 26.97697021 | 13.53136429 | 11.86434022 | 17.78949675 | 31.14220513 | 22.52092213 | 7.599069763 | 2.278490998 | 8.039152634 |
| ENSMUSG00000063286  | -0.271222785 | 3.300712572  | 0.506180222 | 0.476797101 | 0.999071534 | Gm8995        | Gm8995        |          | 15.72032751 | 11.85800888 | 13.19476319 | 5.064893778 | 9.810384239 | 19.06368632 | 7.24811287  | 6.217420715 | 4.792687961 | 7.581639883 |
| ENSMUSG00000089832  | -0.187534686 | 4.269093183  | 0.505985969 | 0.476881803 | 0.999071534 | Shkbp1        | Shkbp1        | SHKBP1   | 25.75607231 | 19.92145492 | 20.39802676 | 20.32895722 | 19.48996336 | 28.15895651 | 16.69654572 | 11.39860464 | 16.57798623 | 14.96720287 |
| ENSMUSG00000031165  | -0.32125188  | 3.081157616  | 0.505859519 | 0.476936753 | 0.999071534 | Was           | Was           | WAS      | 15.86068758 | 11.26510844 | 7.135943356 | 4.162926393 | 10.13739705 | 17.31739444 | 8.801279913 | 2.763298096 | 3.928432755 | 5.294076125 |
| ENSMUSG00000070883  | 0.356950544  | 2.898057847  | 0.505805744 | 0.476960176 | 0.999071534 | Ccdc173       | Ccdc173       | CCDC173  | 3.438821644 | 4.98036373  | 9.492151068 | 8.950291745 | 6.213243352 | 4.584016176 | 2.070889391 | 7.529987311 | 12.88525944 | 10.39207536 |
| ENSMUSG00000042211  | -0.202248402 | 4.708632549  | 0.50575376  | 0.476982821 | 0.999071534 | Fbxo38        | Fbxo38        | FBXO38   | 31.51083506 | 46.18694459 | 21.67711095 | 20.1208109  | 25.76860927 | 42.49310233 | 27.11570797 | 19.55033403 | 13.27810271 | 19.1501766  |
| ENSMUSG00000028854  | -0.198548455 | 4.857812621  | 0.50557302  | 0.477061567 | 0.999071534 | Slc9a1        | Slc9a1        | SLC9A1   | 30.94939479 | 38.00491846 | 26.7934477  | 24.63064782 | 40.54958819 | 43.73005907 | 23.68579741 | 30.94893867 | 9.585375922 | 27.38540613 |
| ENSMUSG00000036199  | -0.1733693   | 6.760348618  | 0.505214608 | 0.477217786 | 0.999071534 | Ndufa13       | Ndufa13       | NDUFA13  | 108.5685119 | 85.91127435 | 145.4789962 | 133.2136446 | 120.536921  | 83.16715062 | 101.5382955 | 98.0970824  | 81.39712668 | 122.6134174 |
| ENSMUSG00000022110  | -0.162481105 | 6.370892242  | 0.505131301 | 0.477254108 | 0.999071534 | Suc1a2        | Suc1a2        | SUCLA2   | 107.6561715 | 84.01399292 | 89.87249416 | 83.32790997 | 88.81667865 | 107.8335234 | 106.6508037 | 55.88770399 | 51.54103774 | 62.94068282 |
| ENSMUSG00000030917  | 0.229094734  | 3.10345505   | 0.50485795  | 0.477373323 | 0.999071534 | Tmem159       | Tmem159       | TMEM159  | 8.632144126 | 8.893506661 | 7.943786    | 7.770795933 | 7.194281776 | 8.876983706 | 9.772009315 | 9.326131073 | 8.249708785 | 7.516280918 |
| ENSMUSG00000031143  | -0.143230615 | 5.398652726  | 0.504828999 | 0.477385952 | 0.999071534 | Ccdc22        | Ccdc22        | CCDC22   | 47.09080251 | 41.74019126 | 51.09604724 | 41.42111761 | 48.00548021 | 53.40742656 | 40.57648901 | 34.74847355 | 29.93465759 | 36.99317391 |
| ENSMUSG00000020758  | -0.174827002 | 5.703662574  | 0.504586884 | 0.477491608 | 0.999071534 | Itgb4         | Itgb4         | ITGB4    | 53.40700553 | 81.93884137 | 45.84507005 | 41.42111761 | 64.94474366 | 43.73005907 | 34.88154319 | 56.50944606 | 48.00544826 | 48.56171063 |
| ENSMUSG00000078624  | 0.302187936  | 2.780029457  | 0.504484628 | 0.477536215 | 0.999071534 | Olf1r613      | Olf1r613      |          | 5.123142449 | 4.328173242 | 9.155549966 | 6.660682229 | 5.951633105 | 3.929156722 | 4.012348196 | 9.53337843  | 8.01400282  | 9.150255031 |
| ENSMUSG00000056671  | -0.291093207 | 3.361160865  | 0.504407039 | 0.477570082 | 0.999071534 | Prelid2       | Prelid2       | PRELID2  | 13.33420637 | 19.20997439 | 6.664701814 | 6.521918016 | 12.68809695 | 5.457162114 | 10.74273872 | 13.19474841 | 3.614158135 | 10.98030604 |
| ENSMUSG00000041498  | 0.2361893    | 3.477557749  | 0.504160945 | 0.477677522 | 0.999071534 | Kif14         | Kif14         | KIF14    | 12.98330621 | 7.589125684 | 9.492151068 | 10.12978756 | 12.36108414 | 16.4442485  | 12.9430587  | 7.253657501 | 12.88525944 | 8.039152634 |
| ENSMUSG00000072620  | -0.221394255 | 5.648053861  | 0.504051902 | 0.477725142 | 0.999071534 | Slfn2         | Slfn2         | SLFN12L  | 94.18160501 | 67.70923071 | 40.32481198 | 46.6247756  | 31.65483981 | 68.10538318 | 72.80470516 | 29.08371246 | 25.69195022 | 34.44417429 |
| ENSMUSG00000070348  | 0.236499522  | 8.572701451  | 0.504043436 | 0.477728839 | 0.999071534 | Ccnd1         | Ccnd1         | CCND1    | 363.3922137 | 210.8353979 | 372.3481387 | 449.2491399 | 410.7280868 | 577.8043246 | 291.6718277 | 182.9303339 | 506.6892567 | 416.9248346 |
| ENSMUSG00000015942  | 0.275648479  | 3.882428012  | 0.504002683 | 0.477746638 | 0.999071534 | Gtf2ird2      | Gtf2ird2      | UTF2IRD2 | 10.52700503 | 11.32439848 | 14.40652715 | 21.2309246  | 10.39900729 | 11.64194584 | 7.701119924 | 11.12227484 | 24.74912636 | 18.30051006 |
| ENSMUSG000000666838 | 0.294546299  | 2.551214897  | 0.50397377  | 0.477759266 | 0.999071534 | Zfp772        | Zfp772        |          | 2.526481208 | 7.233385418 | 6.058819831 | 6.521918016 | 4.185763942 | 5.384399953 | 4.594785837 | 6.839162787 | 4.714119306 | 8.758101244 |
| ENSMUSG00000027173  | 0.200609944  | 3.841723786  | 0.503727541 | 0.477866836 | 0.999071534 | Depdc7        | Depdc7        | DEPDC7   | 16.49230788 | 10.37575777 | 10.50195437 | 15.74973819 | 15.43500454 | 15.20729176 | 16.89069616 | 15.26722198 | 11.62816095 | 14.31361323 |
| ENSMUSG00000024381  | -0.161037011 | 6.982164343  | 0.503566202 | 0.477937341 | 0.999071534 | Bin1          | Bin1          | BIN1     | 144.9919493 | 114.4890758 | 148.4410859 | 138.0010099 | 145.9785175 | 174.1926147 | 121.729467  | 93.60672299 | 85.79697137 | 112.6134958 |
| ENSMUSG00000083902  | -0.554460705 | 1.08345884   | 0.503096111 | 0.478142868 | 0.999071534 | Gm15975       | Gm15975       |          | 0.280720134 | 5.039653775 | 2.962089695 | 1.873316877 | 2.027479409 | 3.056010784 | 2.459181152 | 1.865226215 | 0.707117896 | 0           |
| ENSMUSG00000060791  | -0.207802131 | 4.726009203  | 0.503064176 | 0.478156835 | 0.999071534 | Gmfg          | Gmfg          | GMFG     | 47.93296291 | 15.53399163 | 31.23658224 | 28.16913526 | 23.80653242 | 30.48734568 | 32.35764674 | 16.64887103 | 17.04939816 | 23.2024324  |
| ENSMUSG00000033029  | 0.407281508  | 2.309942654  | 0.502914734 | 0.478222205 | 0.999071534 | 1700088E04Rik | 1700088E04Rik | C22orf23 | 2.105401006 | 2.668051998 | 7.607184899 | 6.868828548 | 1.962076848 | 2.037340523 | 2.394465859 | 6.493750525 | 3.221314859 | 11.9606905  |
| ENSMUSG00000020654  | 0.277579186  | 4.108578291  | 0.502758773 | 0.478290443 | 0.999071534 | Adcy3         | Adcy3         | ADCY3    | 25.68589228 | 17.90559341 | 17.70521795 | 4.301690606 | 15.76201734 | 27.14028625 | 29.44545853 | 8.497141644 | 11.31388633 | 16.86261284 |
| ENSMUSG00000063808  | 0.270891631  | 3.580555088  | 0.502554614 | 0.478379792 | 0.999071534 | Gpatch1       | Gpatch1       | GPATCH1  | 8.632144126 | 9.249246928 | 15.34901024 | 9.991023343 | 12.4264867  | 9.677367482 | 5.824376413 | 12.15851162 | 19.87786974 | 11.89533154 |
| ENSMUSG00000047126  | -0.197112542 | 8.468327582  | 0.50244835  | 0.478426309 | 0.999071534 | Cltc          | Cltc          | CLTC     | 378.1300207 | 523.353222  | 329.9363999 | 325.0551692 | 412.8863714 | 536.6937034 | 383.9558362 | 286.0704354 | 168.6083338 | 278.4945478 |
| ENSMUSG00000042500  | 0.387151326  | 0.846189441  | 0.502235849 | 0.478519354 | 0.999071534 | Ago4          | Ago4          | AGO4     | 2.245761073 | 1.245090933 | 1.346404407 | 1.318260024 | 1.373453794 | 1.819054038 | 2.329750565 | 0.898071881 | 2.357059653 | 1.568615148 |
| ENSMUSG00000036620  | -0.154403864 | 6.351002037  | 0.502225412 | 0.478523924 | 0.999071534 | Mgat4b        | Mgat4b        | MGAT4B   | 81.68955904 | 86.32630466 | 99.23000478 | 74.65514665 | 104.7749037 | 85.64106411 | 65.55659229 | 92.91589847 | 49.65539002 | 81.69870563 |
| ENSMUSG00000055818  | -0.595234065 | -0.348906406 | 0.502117397 | 0.478571231 | 0.999071534 | A230083G16Rik | A230083G16Rik |          | 1.052700503 | 0.711480533 | 0.605881983 | 1.110113705 | 0.588623054 | 0.509335131 | 0.323576467 | 0.898071881 | 0.707117896 | 0           |
| ENSMUSG00000031207  | -0.20445319  | 10.05871145  | 0.501707583 | 0.478750784 | 0.999071534 | Msn           | Msn           | MSN      | 931.6399453 | 1347.721999 | 1353.40571  | 840.6336029 | 1479.471346 | 1597.420494 | 667.1499605 | 1178.61572  | 630.1206139 | 844.9606931 |
| ENSMUSG00000025203  | -0.178029248 | 8.019121783  | 0.501525183 | 0.478830736 | 0.999071534 | Scd2          | Scd2          | SCD      | 249.7005593 | 342.3407164 | 263.0874211 | 238.8825928 | 339.0468793 | 285.154911  | 228.6391319 | 265.3456996 | 178.3508471 | 225.3577096 |
| ENSMUSG00000027939  | 0.317437946  | 2.740940006  | 0.501471273 | 0.47885437  | 0.999071534 | Nup210l       | Nup210l       | NUP210L  | 4.772242281 | 4.624623464 | 6.597381593 | 5.82809695  | 8.502333007 | 3.929156722 | 2.9769035   | 6.217420715 | 9.428238612 | 11.045665   |
| ENSMUSG00000033781  | 0.209434967  | 4.007748774  | 0.501208598 | 0.478969556 | 0.999071534 | Asb13         | Asb13         | ASB13    | 17.12392818 | 14.52606088 | 16.96469553 | 18.17811192 | 9.679579116 | 24.9574214  | 18.37914335 | 10.77686257 | 10.99961171 | 19.60768935 |
| ENSMUSG00000021830  | -0.210415472 | 5.427199458  | 0.50105854  | 0.479035378 | 0.999071534 | Txndc16       | Txndc16       | TXNDC16  | 30.80903472 | 73.10462475 | 37.29540207 | 44.82084083 | 52.97607489 | 26.99476192 | 33.97552908 | 61.62154754 | 34.25593362 | 30.91479021 |

|                     |              |              |             |             |             |               |               |           |             |             |             |             |             |             |              |             |             |             |
|---------------------|--------------|--------------|-------------|-------------|-------------|---------------|---------------|-----------|-------------|-------------|-------------|-------------|-------------|-------------|--------------|-------------|-------------|-------------|
| ENSMUSG00000096255  | 0.186080738  | 5.077651734  | 0.500976441 | 0.479071396 | 0.999071534 | Dynlt1b       | Dynlt1b       | DYNLT1    | 27.01931291 | 26.91768016 | 25.31240285 | 42.66999553 | 40.74579587 | 29.03210245 | 44.84769838  | 28.18564058 | 24.6705577  | 45.75127515 |
| ENSMUSG00000097057  | -0.541043503 | 0.091381189  | 0.50077011  | 0.479161938 | 0.999071534 | Gm17638       | Gm17638       |           | 1.403600671 | 0.889350666 | 1.683005509 | 0.763203172 | 0.981038424 | 0.9459081   | 1.0354444696 | 1.381649048 | 0           | 0.392153787 |
| ENSMUSG00000047547  | -0.157855178 | 6.629937836  | 0.500691054 | 0.479196637 | 0.999071534 | Cltb          | Cltb          | CLTB      | 118.9551569 | 96.87993256 | 97.6143195  | 97.13494917 | 132.3747847 | 103.7588423 | 106.9743801  | 98.37341221 | 52.40529295 | 96.27375472 |
| ENSMUSG00000092465  | -0.673546377 | -0.364228269 | 0.500416259 | 0.479317279 | 0.999071534 | Gm20472       | Gm20472       |           | 1.122880537 | 1.304380977 | 0           | 0.485674746 | 1.177246109 | 0.800383777 | 0.323576467  | 0.621742072 | 0           | 0.71894861  |
| ENSMUSG00000037434  | -0.265765069 | 3.57659203   | 0.500098471 | 0.479456858 | 0.999071534 | Slc30a1       | Slc30a1       | SLC30A1   | 12.7727661  | 16.60121243 | 11.04051614 | 15.26406344 | 10.98763035 | 22.19245926 | 13.71964222  | 4.697606763 | 4.32127603  | 9.999921569 |
| ENSMUSG00000098194  | 0.636136807  | -0.336881093 | 0.499441727 | 0.479745525 | 0.999071534 | Gm7286        | Gm7286        |           | 0.98252047  | 0.355740266 | 0.673202203 | 0.138764213 | 0.588623054 | 0.072762162 | 0.129430587  | 1.4507315   | 0.942823861 | 1.111102397 |
| ENSMUSG000000026791 | -0.241690874 | 3.030984578  | 0.499316363 | 0.479800661 | 0.999071534 | Slc2a8        | Slc2a8        | SLC2A8    | 12.3516859  | 9.782857327 | 8.886269085 | 6.383153803 | 8.044515076 | 9.313556675 | 7.377543457  | 6.977327692 | 3.928432755 | 8.692742279 |
| ENSMUSG00000097591  | 0.520959815  | 0.232946116  | 0.499302928 | 0.47980657  | 0.999071534 | A330032B11Rik | A330032B11Rik |           | 1.543960738 | 0.355740266 | 0.740522424 | 1.318260024 | 0.523220493 | 0.873145938 | 0.388291761  | 1.657978857 | 2.121353688 | 0.653589645 |
| ENSMUSG000000024299 | -0.305385632 | 2.347571266  | 0.499248486 | 0.479830517 | 0.999071534 | Adamts10      | Adamts10      | ADAMTS10  | 7.649623656 | 4.387463286 | 5.654898509 | 4.995511672 | 5.820827982 | 9.386318836 | 2.265035272  | 3.937699786 | 1.964216377 | 5.032640267 |
| ENSMUSG00000066407  | 0.232391383  | 7.368506202  | 0.4992278   | 0.479839617 | 0.999071534 | Gm10263       | Gm10263       | RPS28     | 131.5875629 | 102.9275171 | 203.7109868 | 209.5339618 | 134.0752513 | 108.4883828 | 117.1346812  | 179.1998815 | 218.4208612 | 203.0049438 |
| ENSMUSG00000013707  | -0.205698408 | 3.89141944   | 0.499094875 | 0.479898097 | 0.999071534 | Tnfaip8l2     | Tnfaip8l2     | TNFAIP8L2 | 17.19410822 | 9.96072746  | 21.00390875 | 16.65170557 | 16.87386089 | 16.80805931 | 14.81980221  | 11.12227484 | 8.406846095 | 15.88222837 |
| ENSMUSG00000079164  | -0.377730477 | 2.203156521  | 0.49897713  | 0.479949907 | 0.999071534 | Tlr5          | Tlr5          | TLR5      | 4.631882214 | 9.486407105 | 3.366011017 | 1.040731598 | 8.044515076 | 5.529924276 | 2.653327033  | 6.63191543  | 2.042785033 | 2.287563758 |
| ENSMUSG00000093059  | 0.529523929  | 1.575877878  | 0.498739388 | 0.480054549 | 0.999071534 | Gm24809       | Gm24809       |           | 0.98252047  | 0.830060622 | 3.90457278  | 4.648601139 | 1.63506404  | 0.363810808 | 0.776583522  | 2.279720929 | 8.092571475 | 3.071871332 |
| ENSMUSG00000066850  | 0.534679019  | -0.016546958 | 0.498711366 | 0.480066885 | 0.999071534 | Vmn1r65       | Vmn1r65       |           | 0.842160403 | 0.711480533 | 1.211763966 | 0.138764213 | 0.784830739 | 0.873145938 | 0.323576467  | 0.621742072 | 1.571373102 | 1.372538255 |
| ENSMUSG00000021832  | 0.192924722  | 7.777171926  | 0.498696166 | 0.480073577 | 0.999071534 | Psmc6         | Psmc6         | PSMC6     | 238.6822941 | 199.7481596 | 195.1613188 | 222.5777978 | 204.971628  | 179.4314903 | 336.8431026  | 204.8985538 | 203.88566   | 188.6913305 |
| ENSMUSG00000046591  | -0.279490746 | 2.872621207  | 0.498605346 | 0.480113563 | 0.999071534 | Ticrr         | Ticrr         | TICRR     | 10.31646493 | 3.853852886 | 7.741825339 | 9.713494917 | 9.221761185 | 10.33222694 | 5.241938772  | 3.592287524 | 6.521198373 | 6.078383699 |
| ENSMUSG00000002846  | 0.212670278  | 4.002998692  | 0.498525345 | 0.480148791 | 0.999071534 | Timmdc1       | Timmdc1       | TIMMDC1   | 20.07148959 | 18.73565403 | 12.18495988 | 9.435966491 | 16.61225065 | 19.50025929 | 24.98010328  | 12.71117124 | 13.04239675 | 12.81035704 |
| ENSMUSG000000040557 | 0.404570546  | 1.804948314  | 0.498166055 | 0.480307052 | 0.999071534 | Wbscr27       | Wbscr27       | WBSCR27   | 1.965040939 | 1.897281421 | 1.615685288 | 4.093544286 | 5.428412612 | 1.819054038 | 1.164875283  | 7.115492597 | 3.378452169 | 4.444409586 |
| ENSMUSG000000055128 | 0.166585704  | 4.9218208    | 0.497496969 | 0.480602002 | 0.999071534 | Cgrrf1        | Cgrrf1        | CGRRF1    | 28.28255352 | 24.60536843 | 31.16926202 | 33.16464693 | 30.01977577 | 28.30448083 | 43.35924663  | 29.36004227 | 22.07779208 | 30.98014918 |
| ENSMUSG000000021196 | -0.246947607 | 6.055341163  | 0.497159277 | 0.480750978 | 0.999071534 | Pfkip         | Pfkip         | PFKP      | 72.28543455 | 131.0309981 | 44.49866565 | 49.26129565 | 79.39870978 | 32.74297269 | 38.05259257  | 105.7652346 | 41.16997527 | 69.47657927 |
| ENSMUSG00000028452  | -0.222828894 | 8.376995571  | 0.497063241 | 0.480793358 | 0.999071534 | Vcp           | Vcp           | VCP       | 458.4861591 | 414.6152805 | 325.1566643 | 276.0020199 | 393.3310054 | 650.3481997 | 319.1758274  | 166.4887103 | 155.6445057 | 277.7755991 |
| ENSMUSG00000044991  | 0.30457455   | 2.447615158  | 0.496985027 | 0.480827879 | 0.999071534 | 1110034G24Rik | 1110034G24Rik | C20orf196 | 8.140883891 | 3.735272798 | 3.635291898 | 4.648601139 | 4.643581873 | 4.511254014 | 7.895265804  | 3.108710358 | 3.8498641   | 0.919537102 |
| ENSMUSG00000024477  | 0.241847357  | 3.381774878  | 0.496934886 | 0.480850012 | 0.999071534 | Pggt1b        | Pggt1b        | PGGT1B    | 4.491522147 | 14.8225111  | 10.56927459 | 8.880909638 | 10.13739705 | 13.75204853 | 11.45460695  | 10.98410993 | 8.249708785 | 9.934562605 |
| ENSMUSG00000016087  | -0.220223101 | 3.415354502  | 0.496803054 | 0.480908211 | 0.999071534 | Fli1          | Fli1          | FLI1      | 13.61492651 | 12.98451973 | 14.20456649 | 8.187088573 | 10.07199449 | 13.46099988 | 11.00159989  | 8.151729382 | 7.385453579 | 7.712357812 |
| ENSMUSG000000003849 | -0.281874091 | 2.467323062  | 0.496784145 | 0.480916559 | 0.999071534 | Nqo1          | Nqo1          | NQO1      | 6.73728322  | 4.209593153 | 6.193460271 | 7.354503294 | 6.14784079  | 4.438491853 | 7.830550511  | 4.62852431  | 3.299883514 | 3.33330719  |
| ENSMUSG000000031783 | 0.150021239  | 6.280295649  | 0.496566138 | 0.48101283  | 0.999071534 | Polr2c        | Polr2c        | POLR2C    | 77.26821693 | 78.50001879 | 70.41695048 | 75.97340667 | 79.72572259 | 76.76408041 | 104.3857684  | 78.40858347 | 58.6122167  | 76.01247572 |
| ENSMUSG000000038774 | -0.200586921 | 5.220784792  | 0.496431109 | 0.481072474 | 0.999071534 | Ascc3         | Ascc3         | ASCC3     | 42.17820016 | 69.07290173 | 26.59148704 | 26.15705417 | 43.75431371 | 48.67788606 | 37.7290161   | 40.4823171  | 17.12796681 | 27.58148302 |
| ENSMUSG000000024727 | -0.381933544 | 1.1802472    | 0.496367748 | 0.481100465 | 0.999071534 | Trpm6         | Trpm6         | TRPM6     | 2.947561409 | 3.972432975 | 2.356207712 | 1.942698983 | 1.308051232 | 2.473913492 | 2.070889391  | 0.552659619 | 1.964216377 | 1.895409971 |
| ENSMUSG000000006471 | 0.2010279    | 4.107925529  | 0.496358789 | 0.481104423 | 0.999071534 | Ndor1         | Ndor1         | NDOR1     | 20.56274983 | 12.6880695  | 15.5509709  | 14.63962448 | 19.42456079 | 18.3360647  | 10.67802342  | 21.07014798 | 16.49941757 | 20.98022761 |
| ENSMUSG000000038422 | -0.272155047 | 2.533437504  | 0.496262575 | 0.481146933 | 0.999071534 | Hdh3          | Hdh3          | HDHD3     | 5.965302851 | 5.869714396 | 7.607184899 | 7.909560147 | 4.578179312 | 5.093351307 | 6.924536402  | 3.385040167 | 3.614158135 | 5.816947841 |
| ENSMUSG000000020785 | 0.268287776  | 2.94412104   | 0.496171343 | 0.481187249 | 0.999071534 | Camkk1        | Camkk1        | CAMKK1    | 9.825204696 | 5.51397413  | 8.549667983 | 3.538487434 | 8.502333007 | 10.11394045 | 6.795105815  | 5.802926001 | 9.585375922 | 7.25484506  |
| ENSMUSG000000024782 | -0.153069637 | 5.146597593  | 0.496139571 | 0.48120129  | 0.999071534 | Ak3           | Ak3           | AK3       | 31.37047499 | 35.87047687 | 41.60389617 | 37.67448386 | 46.37041617 | 46.27673473 | 31.7752091   | 26.94215643 | 24.04200846 | 35.16312229 |
| ENSMUSG000000031979 | 0.157914085  | 4.832996443  | 0.495782174 | 0.481359284 | 0.999071534 | Cog2          | Cog2          | COG2      | 35.30055687 | 27.5105806  | 27.39932968 | 23.45115201 | 25.89941439 | 30.77839432 | 32.68122321  | 30.39627905 | 25.06340098 | 25.09784237 |
| ENSMUSG000000022540 | -0.220257728 | 3.818097195  | 0.495665103 | 0.481411056 | 0.999071534 | Rogdi         | Rogdi         | ROGDI     | 17.68536845 | 9.604987194 | 17.09933597 | 20.25957511 | 12.9497072  | 18.77263767 | 11.38989165  | 7.944482025 | 10.99961171 | 14.11753633 |
| ENSMUSG000000035666 | 0.17572663   | 4.591862325  | 0.495628433 | 0.481427275 | 0.999071534 | Gtf3c4        | Gtf3c4        | GTF3C4    | 23.93139144 | 26.97697021 | 22.55227381 | 18.31687613 | 25.57240158 | 41.25614558 | 23.68579741  | 16.64887103 | 18.85647722 | 25.68607305 |
| ENSMUSG00000026825  | -0.177157584 | 6.370160105  | 0.495579606 | 0.481448871 | 0.999071534 | Dnm1          | Dnm1          | DNM1      | 80.63685854 | 91.54382856 | 92.22870187 | 94.35966491 | 95.61854505 | 82.80333981 | 39.47632902  | 81.10279911 | 63.01206139 | 107.2540608 |
| ENSMUSG00000092412  | -0.769314228 | 0.644834132  | 0.495529631 | 0.481470977 | 0.999071534 | Gm20507       | Gm20507       |           | 0.421080201 | 0           | 1.95228639  | 2.705902155 | 4.185763942 | 1.8918162   | 0.906014109  | 2.556050739 | 0           | 0           |
| ENSMUSG00000046541  | -0.448985575 | 1.263893875  | 0.495476253 | 0.48149459  | 0.999071534 | Zfp526        | Zfp526        | ZNF526    | 4.982782381 | 5.395394041 | 0.538561763 | 1.040731598 | 1.765869163 | 3.638108076 | 1.747312924  | 1.312566595 | 1.964216377 | 0.784307574 |
| ENSMUSG000000027602 | -0.159633744 | 5.844656641  | 0.49544399  | 0.481508863 | 0.999071534 | Map1k3a       | Map1k3a       | MAP1LC3A  | 56.00366677 | 67.35349045 | 56.75094575 | 71.25542343 | 61.74001815 | 43.73005907 | 45.10655956  | 58.16742492 | 55.86231377 | 52.74468436 |

|                    |              |              |             |             |             |               |               |               |             |             |             |             |             |             |             |             |             |             |
|--------------------|--------------|--------------|-------------|-------------|-------------|---------------|---------------|---------------|-------------|-------------|-------------|-------------|-------------|-------------|-------------|-------------|-------------|-------------|
| ENSMUSG00000030410 | -0.154781021 | 5.496173762  | 0.495334822 | 0.481557165 | 0.999071534 | Dmwd          | Dmwd          | DMWD          | 46.52936224 | 43.99321295 | 57.49146817 | 43.15567027 | 55.26516455 | 47.51369147 | 31.83992439 | 52.15725156 | 30.01322625 | 45.09768551 |
| ENSMUSG00000054932 | 0.204135239  | 4.504197624  | 0.494940434 | 0.481731728 | 0.999071534 | Afp           | Afp           | AFP           | 24.77355184 | 14.11103057 | 22.75423448 | 24.28373729 | 22.69468887 | 20.44616739 | 36.30527964 | 16.92520084 | 23.72773384 | 17.51620249 |
| ENSMUSG00000028636 | 0.267933673  | 3.408778166  | 0.494937573 | 0.481732995 | 0.999071534 | Ppcs          | Ppcs          | PPCS          | 14.59744698 | 5.988294485 | 6.799342255 | 12.48877918 | 9.41796887  | 13.67928637 | 17.08483748 | 4.973936572 | 7.935434165 | 12.48356222 |
| ENSMUSG00000035455 | 0.214569862  | 4.547817641  | 0.494837158 | 0.481777457 | 0.999071534 | Figl1         | Figl1         | FIGNL1        | 26.03679244 | 10.73149804 | 24.97580175 | 25.32446889 | 24.46055804 | 36.01726995 | 33.00479967 | 16.16529386 | 21.29210553 | 15.94758734 |
| ENSMUSG00000085037 | 0.366329581  | 1.328558318  | 0.49479461  | 0.481796299 | 0.999071534 | 4933421O10Rik | 4933421O10Rik |               | 1.052700503 | 1.719411288 | 2.692808814 | 2.914048475 | 2.354492217 | 1.964578361 | 1.68259763  | 2.694215643 | 3.614158135 | 2.548999616 |
| ENSMUSG00000024099 | 0.192461868  | 7.489157664  | 0.494460471 | 0.481944309 | 0.999071534 | Ndufv2        | Ndufv2        | NDUFV2        | 169.2040609 | 131.6831886 | 200.4796162 | 210.3665471 | 153.6960198 | 152.4367284 | 240.4820306 | 157.1625792 | 186.6005559 | 171.3712049 |
| ENSMUSG00000041235 | 0.279499854  | 4.910727771  | 0.494413485 | 0.481965128 | 0.999071534 | Chd7          | Chd7          | CHD7          | 22.10671057 | 25.07968878 | 36.28559876 | 33.9278501  | 22.17146838 | 20.95550252 | 7.571689337 | 30.05086679 | 48.79113482 | 42.87548072 |
| ENSMUSG00000029202 | 0.154988108  | 6.785149603  | 0.494191349 | 0.482063573 | 0.999071534 | Pds5a         | Pds5a         | PD55A         | 108.708872  | 113.1846948 | 102.3267349 | 112.676541  | 103.5976576 | 153.3826365 | 106.6508037 | 85.45499361 | 108.2676067 | 109.3455476 |
| ENSMUSG00000079019 | 0.320480576  | 2.524616256  | 0.49414226  | 0.482085333 | 0.999071534 | Ins3          | Ins3          | INSL3         | 5.965302851 | 3.260952442 | 5.116336746 | 5.897479057 | 5.690022859 | 4.729540499 | 1.747312924 | 7.460904859 | 7.149747614 | 8.169870563 |
| ENSMUSG00000057657 | 0.403329989  | 3.120658912  | 0.494128821 | 0.48209129  | 0.999071534 | Rps18-ps3     | Rps18-ps3     |               | 9.825204696 | 12.03587901 | 4.173853661 | 4.856747458 | 7.652099707 | 4.511254014 | 27.56871502 | 10.56961522 | 1.728510412 | 3.202589261 |
| ENSMUSG00000091537 | 0.213209693  | 7.634403208  | 0.494123488 | 0.482093654 | 0.999071534 | Tma7          | Tma7          | TMA7          | 195.3812134 | 114.3704957 | 206.0671945 | 263.7907691 | 167.7575705 | 148.2892852 | 220.6791508 | 179.3380464 | 233.1917683 | 218.4950183 |
| ENSMUSG00000086877 | 0.472561801  | 0.908549967  | 0.494120826 | 0.482094834 | 0.999071534 | A230072C01Rik | A230072C01Rik |               | 1.122880537 | 1.363671021 | 1.481044848 | 0.832585279 | 2.812310149 | 1.528005392 | 1.876743511 | 2.625133191 | 0.078568655 | 3.856178906 |
| ENSMUSG00000043004 | -0.182851127 | 7.137469836  | 0.494028483 | 0.482135773 | 0.999071534 | Gng2          | Gng2          | GNG2          | 119.5165971 | 162.6918819 | 158.1351976 | 171.6513316 | 162.1983528 | 115.764599  | 89.95425794 | 164.3471542 | 115.8101976 | 141.5675171 |
| ENSMUSG00000073415 | 0.525324422  | -0.310324943 | 0.493932632 | 0.482178272 | 0.999071534 | Gm10501       | Gm10501       |               | 0.912340436 | 0.355740266 | 0.269280881 | 0.485674746 | 0.850233301 | 0.582097292 | 1.100159989 | 0.898071881 | 0.235705965 | 1.045743432 |
| ENSMUSG00000045095 | 0.211036674  | 3.884894572  | 0.493864298 | 0.482208575 | 0.999071534 | Mag1l         | Mag1l         | MAG1L         | 13.47456644 | 11.20581839 | 15.48365068 | 14.50086027 | 15.69661478 | 19.2819728  | 9.966155196 | 10.63869767 | 17.59937874 | 17.77763835 |
| ENSMUSG00000024617 | 0.494782797  | 0.010569229  | 0.493746377 | 0.482260874 | 0.999071534 | Camk2a        | Camk2a        | CAMK2A        | 0.421080201 | 0.355740266 | 1.211763966 | 0.971349492 | 0.784830739 | 0.800383777 | 0.647152935 | 0.967154334 | 0.628549241 | 1.895409971 |
| ENSMUSG00000025130 | -0.196833746 | 10.176222    | 0.493697901 | 0.482282376 | 0.999071534 | P4hb          | P4hb          | P4HB          | 1335.876938 | 1732.395808 | 985.8373067 | 1137.242108 | 1237.808881 | 944.7439052 | 1415.323468 | 1228.424168 | 685.1972411 | 936.2671665 |
| ENSMUSG00000041219 | 0.167967401  | 5.277114323  | 0.49366504  | 0.482296953 | 0.999071534 | Arhgap11a     | Arhgap11a     | ARHGAP11B     | 41.82729999 | 35.81118682 | 36.01631788 | 38.64583335 | 36.56003193 | 67.15947509 | 48.53647011 | 25.49142493 | 31.74173666 | 29.73832885 |
| ENSMUSG00000057894 | 0.296936061  | 2.871136563  | 0.493631398 | 0.482311878 | 0.999071534 | Zfp329        | Zfp329        | ZNF329        | 3.649361744 | 5.632554219 | 11.78103856 | 4.787365352 | 7.652099707 | 8.222124252 | 5.112508185 | 9.049801264 | 9.978219197 | 4.967281302 |
| ENSMUSG00000000901 | -0.186350568 | 5.156246783  | 0.493560398 | 0.482343377 | 0.999071534 | Mmp11         | Mmp11         | MMP11         | 36.63397751 | 52.17523908 | 27.19736902 | 32.60959008 | 48.46329814 | 29.46867542 | 23.75051271 | 47.5978097  | 22.94204729 | 35.94743048 |
| ENSMUSG00000017747 | -0.176285999 | 4.798156454  | 0.493459544 | 0.482388126 | 0.999071534 | Ghdc          | Ghdc          | GHDC          | 33.8969562  | 32.13520407 | 23.09083558 | 32.95650061 | 30.21598346 | 25.03018356 | 21.8090539  | 22.58996193 | 30.7989128  | 22.48348379 |
| ENSMUSG00000023051 | 0.145821721  | 5.092909079  | 0.493409415 | 0.482410372 | 0.999071534 | Tarbp2        | Tarbp2        | TARBP2        | 35.86199714 | 29.17070185 | 36.95880097 | 30.7362732  | 34.99037045 | 45.33082663 | 32.55179262 | 31.57068074 | 28.04900987 | 36.53566116 |
| ENSMUSG00000022679 | 0.27958036   | 2.908892998  | 0.493382293 | 0.482422408 | 0.999071534 | Mpv17l        | Mpv17l        | RP11-1021N1.1 | 9.193584394 | 6.759065062 | 7.001302916 | 7.215739081 | 4.381971627 | 6.69411886  | 6.471529348 | 6.493750525 | 12.02100423 | 5.816947841 |
| ENSMUSG00000034126 | -0.208344177 | 4.069204388  | 0.493358068 | 0.482433159 | 0.999071534 | Pomt2         | Pomt2         | POMT2         | 26.87895285 | 17.54985314 | 12.99280253 | 20.19019301 | 15.04258917 | 25.17570789 | 17.92613629 | 10.43145031 | 11.23531768 | 11.89533154 |
| ENSMUSG00000018565 | -0.143005225 | 5.555387208  | 0.493176651 | 0.482513685 | 0.999071534 | Elp5          | Elp5          | ELP5          | 50.6698422  | 52.76813952 | 45.44114873 | 50.02449882 | 56.76942347 | 52.89809143 | 53.84312417 | 40.96589427 | 28.59899046 | 41.82973728 |
| ENSMUSG00000053626 | -0.495516402 | 0.494212063  | 0.493151052 | 0.482525049 | 0.999071534 | Tll1          | Tll1          | TLL1          | 2.38612114  | 3.557402664 | 0.471241542 | 0.277528426 | 1.111843547 | 0.9459081   | 0.906014109 | 0.759906976 | 0.864255206 | 1.568615148 |
| ENSMUSG00000049532 | 0.29093707   | 2.72369143   | 0.493148202 | 0.482526314 | 0.999071534 | Sal2          | Sal2          | SALL2         | 3.649361744 | 5.336103997 | 6.799342255 | 7.007592761 | 7.325086899 | 7.785551283 | 3.106334087 | 5.941090906 | 9.506807267 | 7.25484506  |
| ENSMUSG00000039196 | 1.034436188  | -0.820356435 | 0.493079905 | 0.482556637 | 0.999071534 | Orm1          | Orm1          | ORM1          | 0.210540101 | 1.245090933 | 0           | 0           | 0           | 0           | 0.517722348 | 1.519813953 | 0           | 0.71894861  |
| ENSMUSG00000052997 | 0.208491957  | 7.155082053  | 0.492898459 | 0.482637209 | 0.999071534 | Uba2          | Uba2          | UBA2          | 187.7315897 | 128.0664959 | 119.6953518 | 123.2920033 | 128.7122412 | 186.3438957 | 264.8149809 | 89.25452849 | 109.7604112 | 97.71165193 |
| ENSMUSG00000020537 | 0.140989855  | 5.572432132  | 0.492700289 | 0.482725234 | 0.999071534 | Drg2          | Drg2          | DRG2          | 44.07306106 | 47.37274548 | 50.55748548 | 42.94752395 | 49.44433657 | 56.1723887  | 42.38851723 | 44.42001689 | 46.74834978 | 49.60745406 |
| ENSMUSG00000035745 | -0.510561215 | 0.477141286  | 0.492585668 | 0.482776159 | 0.999071534 | Grin3b        | Grin3b        | GRIN3B        | 0.350900168 | 1.897281421 | 1.077123525 | 2.22022741  | 2.027479409 | 1.309718907 | 0.841298815 | 0.27632981  | 0.235705965 | 2.483640651 |
| ENSMUSG00000046667 | 0.223335441  | 3.530822767  | 0.492306254 | 0.482900337 | 0.999071534 | Rbm12b1       | Rbm12b1       | RBM12B        | 6.596923153 | 10.0200175  | 14.94508892 | 10.33793388 | 12.75349951 | 13.38823772 | 11.00159989 | 10.50053276 | 9.821081887 | 14.83648494 |
| ENSMUSG00000027162 | 0.152989205  | 6.67471311   | 0.492191673 | 0.482951275 | 0.999071534 | Lin7c         | Lin7c         | LIN7C         | 93.69034478 | 102.2160366 | 99.09536434 | 98.03691655 | 108.5028497 | 101.0666424 | 109.6924224 | 103.0019365 | 104.5748799 | 93.39796028 |
| ENSMUSG00000060679 | 0.16556042   | 5.27137259   | 0.491872289 | 0.483093306 | 0.999071534 | Mrps9         | Mrps9         | MRPS9         | 37.19541778 | 29.46715207 | 44.0274241  | 38.1601586  | 39.30693952 | 38.34565912 | 58.76148648 | 38.75525579 | 27.49902928 | 33.65986672 |
| ENSMUSG00000038517 | -0.353155428 | 2.83032837   | 0.491798322 | 0.483126209 | 0.999071534 | Tbkbp1        | Tbkbp1        | TBKBP1        | 9.965564763 | 9.249246928 | 5.520258068 | 6.938210655 | 9.090956062 | 9.168032352 | 6.536244641 | 9.602460883 | 0.392843275 | 5.294076125 |
| ENSMUSG00000071662 | -0.166440676 | 6.856184467  | 0.491703252 | 0.483168505 | 0.999071534 | Polr2g        | Polr2g        | POLR2G        | 151.3081523 | 104.6469284 | 129.5241039 | 129.1201003 | 120.4061159 | 114.6731666 | 147.1625774 | 79.72115006 | 76.36873276 | 112.4174189 |
| ENSMUSG00000025384 | -0.204775051 | 3.631079808  | 0.4915027   | 0.483257749 | 0.999071534 | 2310003H01Rik | Faap100       | FAAP100       | 15.79050755 | 12.21374915 | 15.95489222 | 12.07248654 | 12.16487646 | 16.73529715 | 8.607134033 | 9.118883716 | 8.32827744  | 13.26786979 |
| ENSMUSG00000056612 | 0.233442464  | 8.18229676   | 0.491252845 | 0.483368971 | 0.999071534 | Ppp1r14b      | Ppp1r14b      | PPP1R14B      | 191.1704414 | 141.9996564 | 430.78209   | 320.3371859 | 293.2650862 | 285.3004353 | 235.3048071 | 250.7693022 | 347.9805734 | 363.3958426 |
| ENSMUSG00000022131 | 0.210704559  | 4.630437912  | 0.491189619 | 0.483397122 | 0.999071534 | Gpr180        | Gpr180        | GPRI80        | 28.70363372 | 30.00076247 | 20.39802676 | 14.57024238 | 25.76860927 | 31.14220513 | 43.22981604 | 21.20831288 | 10.60676844 | 24.90176548 |

|                      |              |              |             |             |             |           |          |               |             |             |             |             |             |             |             |             |             |             |
|----------------------|--------------|--------------|-------------|-------------|-------------|-----------|----------|---------------|-------------|-------------|-------------|-------------|-------------|-------------|-------------|-------------|-------------|-------------|
| ENSMUSG00000036570   | -0.752009848 | -0.697096674 | 0.490975145 | 0.483492637 | 0.999071534 | Fxyd1     | Fxyd1    | FXYD1         | 0.421080201 | 0           | 1.279084186 | 1.179495811 | 0.196207685 | 0.800383777 | 0.582437641 | 0.138164905 | 0           | 0.326794823 |
| ENSMUSG00000035683   | 0.253137038  | 4.258269423  | 0.490909686 | 0.483521795 | 0.999071534 | Melk      | Melk     | MELK          | 20.91365    | 12.21374915 | 18.17645949 | 19.63513615 | 18.96674286 | 36.59936725 | 33.7813832  | 9.326131073 | 14.92804447 | 8.758101244 |
| ENSMUSG00000015757   | 0.165684016  | 4.984500134  | 0.490764292 | 0.483586569 | 0.999071534 | Ppil4     | Ppil4    | PPIL4         | 21.40491023 | 29.70431225 | 29.55357673 | 35.87054909 | 37.27946011 | 41.83824288 | 28.99245148 | 33.78131922 | 20.42785033 | 38.56178906 |
| ENSMUSG000000097410  | 0.505242535  | 0.712153349  | 0.490710469 | 0.483610552 | 0.999071534 | Gm26668   | Gm26668  |               | 1.052700503 | 0.355740266 | 2.086926831 | 2.22022741  | 0.719428178 | 1.45524323  | 0.258861174 | 1.105319238 | 3.142746204 | 2.222204793 |
| ENSMUSG000000051234  | 0.186222547  | 6.75082263   | 0.490692928 | 0.483618368 | 0.999071534 | Rnf7      | Rnf7     | RNF7          | 117.8322763 | 82.17600155 | 98.89340368 | 123.2920033 | 98.49625776 | 95.75500456 | 185.4093158 | 93.60672299 | 88.46830564 | 86.79670486 |
| ENSMUSG000000021494  | 0.146646558  | 5.694644018  | 0.490239842 | 0.483820336 | 0.999071534 | Ddx41     | Ddx41    | DDX41         | 55.6527666  | 41.85877135 | 52.10585054 | 41.49049972 | 64.35612061 | 68.10538318 | 55.65515239 | 43.72919237 | 48.16258558 | 47.58132616 |
| ENSMUSG000000028527  | -0.264023302 | 4.877719629  | 0.490056465 | 0.483902118 | 0.999071534 | Ak4       | Ak4      | AK4           | 22.52779077 | 60.29797516 | 26.38952637 | 23.79806255 | 33.42070898 | 11.49642152 | 19.22044216 | 50.91376741 | 16.89226085 | 26.92789338 |
| ENSMUSG000000032513  | -0.251902292 | 3.10928782   | 0.4900063   | 0.483924494 | 0.999071534 | Gorasp1   | Gorasp1  | GORASP1       | 8.351423991 | 13.99245048 | 6.530061373 | 7.076974868 | 12.23027902 | 12.00575665 | 6.859821109 | 8.980718811 | 4.00700141  | 6.731973344 |
| ENSMUSG000000025340  | -0.214917263 | 4.639942638  | 0.489986878 | 0.483933158 | 0.999071534 | Rabgef1   | Rabgef1  | RABGEF1       | 32.2126354  | 38.95355918 | 22.8215547  | 13.52951078 | 32.11265774 | 28.37724299 | 26.72741621 | 31.15618603 | 10.29249382 | 16.73189491 |
| ENSMUSG000000024091  | 0.199205287  | 7.827049409  | 0.489875357 | 0.48398291  | 0.999071534 | Vapa      | Vapa     | VAPA          | 159.5893963 | 250.2632774 | 224.7148955 | 230.2098295 | 229.9554066 | 182.4875011 | 191.1042616 | 341.8890569 | 201.1357571 | 234.7040415 |
| ENSMUSG000000026986  | 0.425619272  | 1.375308961  | 0.489618102 | 0.48409771  | 0.999071534 | Hnmt      | Hnmt     | HNMT          | 3.649361744 | 2.54947191  | 1.009803305 | 1.942698983 | 1.765869163 | 3.128772945 | 6.989251696 | 1.036236786 | 0.628549241 | 2.287563758 |
| ENSMUSG000000027639  | -0.172920477 | 6.302842681  | 0.489469948 | 0.484163844 | 0.999071534 | Samhd1    | Samhd1   | SAMHD1        | 113.4109342 | 88.57932634 | 86.77576402 | 61.4031643  | 85.74275825 | 126.4606367 | 50.08963715 | 65.42108242 | 43.60560358 | 85.09737179 |
| ENSMUSG000000097674  | 0.647573621  | 0.024867749  | 0.48937668  | 0.484205485 | 0.999071534 | Gm26610   | Gm26610  |               | 0.631620302 | 0.118580089 | 0.807842644 | 1.179495811 | 0.850233301 | 0.291048646 | 0.129430587 | 0.138164905 | 1.571373102 | 2.875794438 |
| ENSMUSG000000021427  | 0.176383708  | 8.045090166  | 0.489195512 | 0.484286388 | 0.999071534 | Ssr1      | Ssr1     | SSR1          | 240.5069749 | 240.4211301 | 289.6789081 | 253.2446889 | 261.8718566 | 352.8964834 | 324.5471968 | 219.129539  | 233.6631803 | 232.5471957 |
| ENSMUSG000000020955  | 0.222637955  | 3.676639846  | 0.489165458 | 0.484299811 | 0.999071534 | Ap4s1     | Ap4s1    | AP4S1         | 14.03600671 | 6.818355107 | 14.13724627 | 12.76630761 | 12.81890207 | 18.55435119 | 18.05556688 | 8.980718811 | 10.8424744  | 10.32671639 |
| ENSMUSG000000003348  | -0.158067947 | 5.42229027   | 0.489119474 | 0.48432035  | 0.999071534 | Mob3a     | Mob3a    | MOB3A         | 55.72294663 | 46.42410477 | 40.66141309 | 35.80116698 | 56.7040209  | 61.77507513 | 40.83535019 | 38.54800844 | 22.47063536 | 37.45068666 |
| ENSMUSG000000045100  | 0.297850884  | 2.276265088  | 0.488962401 | 0.484390519 | 0.999071534 | Slc25a26  | Slc25a26 | SLC25A26      | 5.54422265  | 4.387463286 | 4.375814322 | 4.717983245 | 2.87771271  | 5.893735083 | 7.312828163 | 4.559441858 | 5.028393926 | 2.222204793 |
| ENSMUSG000000075324  | -0.65193955  | -0.802327021 | 0.488815447 | 0.484456183 | 0.999071534 | Figl      | Figl     | FIGN          | 0.140360067 | 0.296450222 | 1.009803305 | 1.110113705 | 0.196207685 | 0.436572969 | 0.064715293 | 0.483577167 | 0.392843275 | 0.261435858 |
| ENSMUSG000000015312  | 0.278958773  | 4.613455854  | 0.488700052 | 0.484507755 | 0.999071534 | Gadd45b   | Gadd45b  | GADD45B       | 13.05348624 | 37.87204833 | 25.98560505 | 14.50086027 | 23.28331193 | 14.98900527 | 10.8721693  | 52.29541646 | 20.03500705 | 27.51612406 |
| ENSMUSG000000022680  | -0.162650809 | 6.35142278   | 0.488625294 | 0.484541171 | 0.999071534 | Pdxdc1    | Pdxdc1   | PDXDC1        | 99.51528756 | 127.7107557 | 75.73524788 | 63.62339171 | 82.6034353  | 106.8148531 | 62.32082762 | 83.79701475 | 56.80513764 | 67.18901551 |
| ENSMUSG000000001998  | 0.214292105  | 3.580982457  | 0.488554428 | 0.48457285  | 0.999071534 | Ap4e1     | Ap4e1    | AP4E1         | 11.9306057  | 15.05967128 | 10.56927459 | 7.215739081 | 12.4264867  | 17.68120525 | 8.865995207 | 13.26383086 | 10.68533709 | 11.50317775 |
| ENSMUSG000000051855  | -0.184168088 | 5.996450647  | 0.48847491  | 0.484608402 | 0.999071534 | Mest      | Mest     | MEST          | 67.5833723  | 83.48038253 | 79.90910155 | 65.98238333 | 54.54573637 | 89.49745867 | 77.20534512 | 28.25472303 | 51.6196064  | 46.53558273 |
| ENSMUSG000000024219  | -0.202833721 | 4.069141053  | 0.488425808 | 0.484630357 | 0.999071534 | Anks1     | Anks1    | ANKS1A        | 19.58022936 | 21.58157616 | 15.14704958 | 14.22333184 | 22.43307863 | 24.59361059 | 10.35444696 | 12.84933615 | 8.878258026 | 20.45735589 |
| ENSMUSG000000032777  | -0.157822625 | 5.568095389  | 0.488381665 | 0.484650096 | 0.999071534 | Gtf3c1    | Gtf3c1   | GTF3C1        | 55.4422265  | 57.98566343 | 45.71042961 | 46.55539349 | 53.82630819 | 74.14464259 | 29.96318088 | 36.19920505 | 32.21314859 | 49.41137717 |
| ENSMUSG000000033379  | 0.202796472  | 7.147946069  | 0.488165463 | 0.484746793 | 0.999071534 | Atp6v0b   | Atp6v0b  | ATP6VOB       | 187.8719498 | 146.3871196 | 105.2215044 | 115.7293537 | 131.2629411 | 107.1059018 | 247.9242893 | 153.0176321 | 96.24660249 | 124.7702632 |
| ENSMUSG000000084350  | 0.768357639  | 1.117343411  | 0.487797467 | 0.484911453 | 0.999071534 | Znf41-ps  | Znf41-ps |               | 3.158101509 | 3.438822576 | 1.279084186 | 0           | 0           | 0.9459081   | 8.154126978 | 2.141556024 | 0           | 1.30717929  |
| ENSMUSG000000045777  | -0.234843531 | 3.347397     | 0.487671592 | 0.484967796 | 0.999071534 | Ifitm10   | Ifitm10  | IFITM10       | 9.193584394 | 11.68013875 | 15.14704958 | 10.75422652 | 9.483371431 | 14.5524323  | 6.665675228 | 11.67493445 | 6.599767028 | 6.013024734 |
| ENSMUSG000000002289  | 0.160282178  | 6.333457747  | 0.487652712 | 0.484976248 | 0.999071534 | Angptl4   | Angptl4  | ANGPTL4       | 59.30212834 | 115.7934567 | 71.62871444 | 64.10906645 | 84.89252495 | 94.29976133 | 73.64600398 | 81.65545873 | 72.91171193 | 87.31957658 |
| ENSMUSG000000058331  | -0.30575955  | 1.830882497  | 0.487568989 | 0.485013732 | 0.999071534 | Zfp85-rs1 | Zfp85    |               | 5.263502516 | 3.913142931 | 3.635291898 | 3.469105327 | 3.400933203 | 2.619437815 | 4.400639957 | 2.832380548 | 1.649941757 | 3.33330719  |
| ENSMUSG0000000046573 | 0.208653854  | 3.650493828  | 0.487392012 | 0.48509298  | 0.999071534 | Lyrn4     | Lyrn4    | LYRN4         | 13.68510654 | 10.19788764 | 11.5790779  | 8.811527532 | 15.89282247 | 11.13261071 | 13.26663516 | 14.57639746 | 9.585375922 | 15.42471562 |
| ENSMUSG000000030560  | -0.230792481 | 7.942600669  | 0.487239081 | 0.485161479 | 0.999071534 | Ctsc      | Ctsc     | CTSC          | 368.0942759 | 313.4664648 | 188.9005383 | 220.4963346 | 294.3769297 | 432.3527638 | 320.9878557 | 125.3155686 | 111.4889216 | 160.194822  |
| ENSMUSG000000071192  | 0.593145632  | 0.095366945  | 0.487107058 | 0.485220625 | 0.999071534 | Wfikkn1   | Wfikkn1  | WFIKKN1       | 0.421080201 | 0.118580089 | 1.615685288 | 1.110113705 | 0.588623054 | 0.727621615 | 0.19414588  | 0.414494714 | 1.257098482 | 2.745076509 |
| ENSMUSG000000030720  | 0.156895362  | 4.824182062  | 0.487082647 | 0.485231563 | 0.999071534 | Cln3      | Cln3     | RP11-435f10.4 | 30.73885469 | 30.06005251 | 26.92808814 | 21.09216039 | 30.1505809  | 32.74297269 | 24.20351976 | 33.2286596  | 22.54920401 | 31.17622607 |
| ENSMUSG000000034484  | 0.212618339  | 7.205527038  | 0.487016142 | 0.485261363 | 0.999071534 | Snx2      | Snx2     | SNX2          | 164.8528988 | 172.4154491 | 105.9620268 | 123.9164423 | 144.2126483 | 236.5497871 | 267.7271691 | 104.7980803 | 79.4329103  | 103.3978818 |
| ENSMUSG000000037979  | -0.488250634 | 0.313010069  | 0.486871709 | 0.485326092 | 0.999071534 | Ccdc92    | Ccdc92   | CCDC92        | 1.403600671 | 0.830060622 | 0.740522424 | 1.873316877 | 1.831271725 | 2.764962138 | 0.323576467 | 0.690824524 | 0.549980586 | 0.457512752 |
| ENSMUSG000000061479  | -0.159066428 | 5.866992464  | 0.48685276  | 0.485334585 | 0.999071534 | Snrpa     | Snrpa    | SNRPA         | 49.26638355 | 44.64540344 | 74.4561637  | 69.38210655 | 80.44515076 | 63.44860485 | 43.55339251 | 57.89109511 | 44.86270206 | 56.40478637 |
| ENSMUSG000000035234  | 0.234919491  | 3.405982645  | 0.486684672 | 0.485409935 | 0.999071534 | Fam175a   | Fam175a  | FAM175A       | 13.40438641 | 6.818355107 | 8.213066882 | 12.55816129 | 8.763943254 | 13.89757285 | 13.78435751 | 8.289894287 | 10.60676844 | 8.169870563 |
| ENSMUSG000000006057  | -0.175275496 | 7.007698215  | 0.486612782 | 0.485442168 | 0.999071534 | Atp5g1    | Atp5g1   | ATP5G1        | 151.6590525 | 88.10500599 | 164.8672196 | 169.3617221 | 130.6089155 | 134.9738096 | 116.6816741 | 99.27148409 | 93.73240553 | 140.9792864 |
| ENSMUSG000000031875  | -0.14806086  | 6.249932712  | 0.486554703 | 0.485468211 | 0.999071534 | Cmtm3     | Cmtm3    | CMTM3         | 73.75921525 | 74.40900573 | 86.84308424 | 86.65825108 | 92.41381954 | 87.60564247 | 69.76308637 | 83.7279323  | 46.1983692  | 65.16288761 |

|                    |              |              |             |             |             |               |               |                |             |             |             |             |             |             |             |             |             |             |
|--------------------|--------------|--------------|-------------|-------------|-------------|---------------|---------------|----------------|-------------|-------------|-------------|-------------|-------------|-------------|-------------|-------------|-------------|-------------|
| ENSMUSG00000068739 | -0.170622868 | 7.694773311  | 0.486325838 | 0.485570858 | 0.999071534 | Sars          | Sars          | SARS           | 213.9789223 | 250.6783078 | 238.8521418 | 201.9713122 | 234.1411705 | 212.8293225 | 155.1225585 | 225.0706299 | 161.065743  | 184.8351516 |
| ENSMUSG00000070283 | -0.211634695 | 3.61921578   | 0.486282806 | 0.485590162 | 0.999071534 | Ndufaf3       | Ndufaf3       | NDUFAF3        | 13.61492651 | 10.25717768 | 9.963392611 | 17.55367296 | 16.08903015 | 14.84348095 | 9.448432848 | 11.32952219 | 7.306884924 | 12.35284429 |
| ENSMUSG00000059495 | -0.172719484 | 5.31379894   | 0.486272947 | 0.485594585 | 0.999071534 | Arhgef12      | Arhgef12      | ARHGEF12       | 30.94939479 | 57.21489285 | 51.9712101  | 37.74386596 | 40.22257538 | 56.5361995  | 29.96318088 | 45.24900632 | 23.80630249 | 28.69258542 |
| ENSMUSG00000082884 | 0.490103327  | 0.720459926  | 0.486105307 | 0.485669801 | 0.999071534 | Gm13339       | Gm13339       |                | 1.543960738 | 0.652190488 | 2.154247051 | 1.80393477  | 0.39241537  | 0.800383777 | 0.388291761 | 2.210638477 | 2.985608894 | 1.699333077 |
| ENSMUSG00000086607 | 0.426198653  | 1.428101329  | 0.485599763 | 0.485896743 | 0.999071534 | 4930511M06Rik | 4930511M06Rik |                | 1.333420637 | 1.007930755 | 4.106533441 | 3.954780073 | 0.784830739 | 1.600767553 | 1.423736457 | 2.763298096 | 4.16413872  | 3.594743048 |
| ENSMUSG00000015363 | -0.162069187 | 6.149903899  | 0.485522074 | 0.485931634 | 0.999071534 | Trabd         | Trabd         | TRABD          | 105.4104104 | 83.30251239 | 66.91629902 | 64.10906645 | 70.24235115 | 90.37060461 | 77.52892159 | 49.67028327 | 37.63438579 | 76.01247572 |
| ENSMUSG00000001240 | -0.220608951 | 3.640069573  | 0.485521491 | 0.485931896 | 0.999071534 | Ramp2         | Ramp2         | RAMP2          | 15.22906728 | 9.842147372 | 18.78234148 | 12.28063286 | 12.81890207 | 17.3901566  | 13.26663516 | 9.257048621 | 5.264099892 | 11.76461361 |
| ENSMUSG00000048371 | 0.426684546  | 1.349953808  | 0.485369299 | 0.486000258 | 0.999071534 | Pdp2          | Pdp2          | PDP2           | 1.824680872 | 3.913142931 | 0.875162864 | 1.942698983 | 2.158284533 | 4.438491853 | 3.559341141 | 2.832380548 | 2.514196963 | 0.261435858 |
| ENSMUSG00000037887 | 0.288214168  | 2.802947718  | 0.485178875 | 0.486085817 | 0.999071534 | Dusp8         | Dusp8         | DUSP8          | 7.368903522 | 8.893506661 | 6.395420932 | 3.954780073 | 5.559217736 | 8.294886414 | 4.206494076 | 8.635306549 | 10.21392516 | 4.052255799 |
| ENSMUSG00000048429 | -0.21264163  | 3.874458615  | 0.48481571  | 0.486249057 | 0.999071534 | 1810026J23Rik | 1810026J23Rik | C19orf52       | 21.40491023 | 15.65257172 | 13.12744297 | 16.23541293 | 14.6501738  | 23.28389169 | 17.02012219 | 9.80970824  | 7.621159544 | 9.803844676 |
| ENSMUSG00000039108 | -0.186656334 | 4.733960555  | 0.484439362 | 0.486418319 | 0.999071534 | Lsm14b        | Lsm14b        | LSM14B         | 30.73885469 | 37.58988815 | 22.8215547  | 21.2309246  | 34.79416277 | 39.36432938 | 25.69197151 | 28.04747567 | 11.78529826 | 18.95409971 |
| ENSMUSG00000096740 | 0.226259887  | 4.3228619    | 0.484380674 | 0.486444723 | 0.999071534 | Gm21743       | Lbhd1         | LBHD1          | 24.70337181 | 14.70393101 | 15.41633046 | 15.68035608 | 25.11458365 | 20.37340523 | 41.22364195 | 15.54355179 | 10.29249382 | 17.64692042 |
| ENSMUSG00000071708 | 0.199641915  | 8.128395836  | 0.484138687 | 0.486553618 | 0.999071534 | Sms           | Sms           | SMS            | 231.0326704 | 269.3546717 | 236.8998554 | 325.9571366 | 283.2584943 | 187.1442794 | 315.8753475 | 338.5040167 | 258.6480126 | 312.7426452 |
| ENSMUSG00000024844 | 0.185256505  | 7.379038853  | 0.483952614 | 0.486637379 | 0.999071534 | Banf1         | Banf1         | BANF1          | 161.8351573 | 109.8644523 | 194.0841952 | 160.203284  | 181.557511  | 176.6665282 | 251.2247693 | 132.085649  | 136.7880285 | 159.0183606 |
| ENSMUSG00000046364 | 0.25166075   | 9.329240912  | 0.483943881 | 0.486641311 | 0.999071534 | Rpl27a        | Rpl27a        |                | 582.1433782 | 412.2436788 | 674.2120067 | 896.5555808 | 452.4549211 | 345.1109321 | 517.8517784 | 625.1961942 | 981.4796395 | 724.0466088 |
| ENSMUSG00000043602 | 0.350534331  | 1.435899482  | 0.483368006 | 0.486900696 | 0.999071534 | Zfp3          | Zfp3          | ZFP3           | 3.158101509 | 3.260952442 | 1.750325729 | 1.248877918 | 2.419894779 | 2.473913492 | 2.006174098 | 1.72706131  | 3.221314859 | 4.248332693 |
| ENSMUSG00000038369 | -0.174126811 | 4.865552007  | 0.483300983 | 0.486930899 | 0.999071534 | Ncoa6         | Ncoa6         | NCOA6          | 26.38769261 | 34.68467598 | 33.59278995 | 28.30789947 | 36.9524473  | 39.07328074 | 16.04939278 | 33.85040167 | 18.62077126 | 26.40502166 |
| ENSMUSG00000068876 | 0.236768139  | 3.241015559  | 0.483187606 | 0.486981999 | 0.999071534 | Cgn           | Cgn           | CGN            | 10.59718506 | 6.699775018 | 10.36731393 | 6.452535909 | 10.52981242 | 17.53568093 | 7.701119924 | 9.395213526 | 5.587374512 | 10.32671639 |
| ENSMUSG00000047155 | 0.538388478  | 0.179375597  | 0.483181954 | 0.486984546 | 0.999071534 | Cyp4x1        | Cyp4x1        | CYP4X1         | 0.210540101 | 0.711480533 | 1.817645949 | 0.20814632  | 1.308051232 | 1.018670261 | 0.323576467 | 1.934308667 | 0.785686551 | 1.633974113 |
| ENSMUSG00000028010 | 0.23599181   | 4.564133744  | 0.48312605  | 0.487009746 | 0.999071534 | Gar1          | Gar1          | GAR1           | 26.59823271 | 22.35234674 | 24.03331866 | 16.85985189 | 22.76009144 | 52.60704278 | 35.39926553 | 9.878790692 | 11.47102364 | 21.04558657 |
| ENSMUSG00000025220 | 0.163520276  | 6.300525786  | 0.48309017  | 0.487025921 | 0.999071534 | Mgea5         | Mgea5         | MGEA5          | 69.61859327 | 87.86784581 | 59.9149961  | 80.13633306 | 87.7048351  | 76.03645879 | 60.63822999 | 103.6236786 | 76.52587007 | 78.88827016 |
| ENSMUSG00000042595 | 0.215106699  | 5.436339343  | 0.483010766 | 0.487061719 | 0.999071534 | Fam199x       | Fam199x       | FAM199X        | 26.45787265 | 38.95355918 | 53.18297407 | 43.84949134 | 44.2775342  | 36.52660508 | 21.03247038 | 50.6374376  | 60.81213905 | 46.27414687 |
| ENSMUSG00000098138 | -0.54930088  | -0.331625621 | 0.482909634 | 0.48710732  | 0.999071534 | Gm9081        | Gm9081        |                | 0.842160403 | 0.355740266 | 1.009803305 | 0.277528426 | 1.63506404  | 0.363810808 | 0.323576467 | 1.036236786 | 0.471411931 | 0.326794823 |
| ENSMUSG00000059022 | -0.712807697 | -0.468878883 | 0.48280905  | 0.48715268  | 0.999071534 | Kcp           | Kcp           | KCP            | 1.19306057  | 1.126510844 | 0.942483085 | 0           | 0.523220493 | 0.654859454 | 1.100159989 | 0.069082452 | 0           | 0.392153787 |
| ENSMUSG00000024830 | 0.221372567  | 4.034113763  | 0.482656048 | 0.487221693 | 0.999071534 | Rps6kb2       | Rps6kb2       | RPS6KB2        | 16.63266795 | 15.3561215  | 18.17645949 | 13.04383603 | 14.78097892 | 13.2427134  | 8.801279913 | 17.96143762 | 21.68494881 | 19.86912521 |
| ENSMUSG00000081992 | -0.523790795 | 0.522830751  | 0.482185811 | 0.487433899 | 0.999071534 | Gm13408       | Gm13408       |                | 1.543960738 | 2.371601776 | 1.683005509 | 0.555056852 | 1.831271725 | 0.9459081   | 2.847472913 | 0.690824524 | 0           | 0.784307574 |
| ENSMUSG00000056602 | 0.370519791  | 2.178804014  | 0.482042036 | 0.487498811 | 0.999071534 | Fry           | Fry           | FRY            | 4.491522147 | 1.897281421 | 6.395420932 | 5.342422204 | 1.63506404  | 3.638108076 | 2.006174098 | 3.039627905 | 7.071178959 | 7.25484506  |
| ENSMUSG00000074093 | -0.489504033 | 0.37484009   | 0.482025468 | 0.487506292 | 0.999071534 | Svip          | Svip          | SVIP           | 3.017741442 | 1.541541155 | 0.538561763 | 0.763203172 | 1.24264867  | 1.309718907 | 1.229590576 | 0.138164905 | 0.628549241 | 1.437897219 |
| ENSMUSG00000032487 | 0.294120896  | 8.847911823  | 0.481818442 | 0.48759979  | 0.999071534 | Ptgs2         | Ptgs2         | PTGS2          | 268.2280882 | 848.8555658 | 369.5206895 | 252.2733394 | 422.5659505 | 277.8059327 | 397.1577561 | 1103.799424 | 327.0813112 | 292.8735199 |
| ENSMUSG00000011171 | -0.362153575 | 1.093028611  | 0.481815752 | 0.487601005 | 0.999071534 | Vlpr2         | Vlpr2         | VIPR2          | 1.894860906 | 2.371601776 | 2.01960661  | 2.01208109  | 3.400933203 | 1.309718907 | 0.970729402 | 2.556050739 | 1.885647722 | 1.503256184 |
| ENSMUSG00000031851 | -0.166360873 | 5.210811142  | 0.48180404  | 0.487606295 | 0.999071534 | Ntpcr         | Ntpcr         | NTPCR          | 49.12602348 | 32.78739456 | 33.79475061 | 44.40454819 | 42.38085991 | 53.62571304 | 39.41161373 | 23.62619872 | 20.50641898 | 36.01278944 |
| ENSMUSG00000014725 | -0.637429849 | 0.063276504  | 0.48173085  | 0.487639357 | 0.999071534 | Adam28        | Adam28        | ADAM28         | 0.280720134 | 0.474320355 | 2.01960661  | 2.567137942 | 0.327012808 | 0.582097292 | 0.129430587 | 0.069082452 | 1.335667137 | 1.176461361 |
| ENSMUSG00000030409 | 0.226195253  | 6.290139007  | 0.481657763 | 0.487672376 | 0.999071534 | Dmpk          | Dmpk          | DMPK           | 55.51240653 | 57.62992316 | 63.07904646 | 78.05486987 | 119.8174928 | 50.64246442 | 41.02949607 | 113.8478815 | 76.52587007 | 113.6592393 |
| ENSMUSG00000026688 | 0.216592866  | 5.489522899  | 0.481624656 | 0.487687334 | 0.999071534 | Mgst3         | Mgst3         | MGST3          | 40.98513959 | 26.91768016 | 34.26599215 | 57.51776633 | 54.41493125 | 21.02826468 | 57.07888885 | 46.21616065 | 47.84831095 | 52.4832485  |
| ENSMUSG00000027637 | 0.339898942  | 6.022654509  | 0.481595502 | 0.487700507 | 0.999071534 | 1110008F13Rik | 1110008F13Rik | TGIF2-C20orf24 | 117.5515562 | 85.49624403 | 25.91828483 | 30.18121635 | 41.46522405 | 111.253345  | 173.5664171 | 26.38949681 | 19.01361453 | 38.49643009 |
| ENSMUSG00000079550 | -0.522234067 | 1.143213592  | 0.481404064 | 0.487787021 | 0.999071534 | Mpp4          | Mpp4          | MPP4           | 1.614140771 | 0.5336104   | 3.702612119 | 3.538487434 | 3.27012808  | 0.291048646 | 0.129430587 | 1.934308667 | 2.907040239 | 2.352922722 |
| ENSMUSG00000001493 | 0.39722635   | 1.401319395  | 0.481252591 | 0.487855491 | 0.999071534 | Meox1         | Meox1         | MEOX1          | 2.456301174 | 1.600831199 | 4.443134543 | 0.555056852 | 2.289089656 | 3.056010784 | 4.530070544 | 1.174401691 | 2.985608894 | 1.960768935 |
| ENSMUSG00000036850 | 0.230945136  | 5.056775953  | 0.481190838 | 0.48788341  | 0.999071534 | Mrpl41        | Mrpl41        | MRPL41         | 48.35404311 | 16.30476221 | 29.08233519 | 42.11493868 | 21.64824789 | 35.50793482 | 59.34392412 | 17.68510781 | 25.69195022 | 35.68599462 |
| ENSMUSG00000079071 | 0.573825364  | 0.642669423  | 0.480910827 | 0.488010039 | 0.999071534 | Gm14085       | Gm14085       | SLC28A2        | 2.315941107 | 1.600831199 | 0           | 0.069382107 | 2.092881971 | 2.182864846 | 2.200319978 | 0.690824524 | 1.492804447 | 1.764692042 |

|                     |              |              |             |             |             |               |               |           |             |             |             |             |             |             |             |             |             |             |
|---------------------|--------------|--------------|-------------|-------------|-------------|---------------|---------------|-----------|-------------|-------------|-------------|-------------|-------------|-------------|-------------|-------------|-------------|-------------|
| ENSMUSG00000030878  | -0.18705213  | 4.903791996  | 0.480744917 | 0.488085093 | 0.999071534 | Cdr2          | Cdr2          | CDR2      | 37.47613791 | 33.14313482 | 28.34181276 | 31.01380163 | 35.05577302 | 48.38683741 | 38.6997455  | 20.10299365 | 13.43524002 | 19.93448417 |
| ENSMUSG00000022261  | -0.178546523 | 7.895846951  | 0.480300692 | 0.488286147 | 0.999071534 | Sdc2          | Sdc2          | SDC2      | 205.9082184 | 329.3561967 | 246.4593267 | 278.7773041 | 248.7913443 | 220.7603981 | 218.4788308 | 252.7036109 | 175.3652382 | 202.5147123 |
| ENSMUSG00000036904  | -0.277345833 | 2.904348236  | 0.480237339 | 0.488314831 | 0.999071534 | Fzd8          | Fzd8          | FZD8      | 4.210802013 | 8.182026128 | 11.30979702 | 8.742145425 | 9.221761185 | 5.675448599 | 3.494625848 | 7.184575049 | 7.071178959 | 7.97379367  |
| ENSMUSG000000086203 | 0.409855808  | 1.231192845  | 0.480217801 | 0.488323678 | 0.999071534 | Gm13985       | Gm13985       |           | 2.666841275 | 1.541541155 | 1.211763966 | 1.665170557 | 2.812310149 | 3.419821592 | 4.530070544 | 1.865226215 | 0.235705965 | 2.679717545 |
| ENSMUSG000000034786 | -0.181499943 | 4.935810132  | 0.479844077 | 0.488492952 | 0.999071534 | Gpsm3         | Gpsm3         | GPSM3     | 32.70389563 | 25.4947191  | 37.63200317 | 39.27027231 | 32.37426799 | 31.36049162 | 16.24353866 | 28.11655812 | 21.5278115  | 41.04542971 |
| ENSMUSG000000035376 | 0.214026237  | 5.013085482  | 0.479546259 | 0.488627914 | 0.999071534 | Ptp1b         | Hacd2         | HACD2     | 25.89643238 | 36.048347   | 36.0836381  | 23.38176991 | 33.61691666 | 24.59361059 | 37.79373139 | 60.17081604 | 13.90665195 | 30.58799539 |
| ENSMUSG000000025262 | 0.468083556  | 1.278554844  | 0.479517659 | 0.488640878 | 0.999071534 | Fam120c       | Fam120c       | FAM120C   | 1.754500839 | 3.913142931 | 1.481044848 | 0.901967385 | 1.962076848 | 7.057929668 | 4.530070544 | 0.967154334 | 1.021392516 | 0.326794823 |
| ENSMUSG000000045268 | -0.304523902 | 1.832930856  | 0.478632197 | 0.489042529 | 0.999071534 | Zfp691        | Zfp691        | ZNF691    | 4.35116208  | 5.51397413  | 4.173853661 | 2.01208109  | 3.727946011 | 3.34705943  | 2.847472913 | 2.417885834 | 3.142746204 | 2.941153403 |
| ENSMUSG000000005054 | 0.195925419  | 8.466216216  | 0.478607657 | 0.489053669 | 0.999071534 | Cstb          | Cstb          | CSTB      | 408.6583353 | 319.6919194 | 290.3521103 | 334.6298999 | 359.2562708 | 252.4119383 | 521.281689  | 361.5775558 | 256.2909529 | 416.4673218 |
| ENSMUSG000000026156 | 0.502583992  | 0.090562295  | 0.478601497 | 0.489056465 | 0.999071534 | B3gat2        | B3gat2        | B3GAT2    | 0.280720134 | 0.415030311 | 1.548365068 | 1.248877918 | 0.457817931 | 0.654859454 | 1.29430587  | 1.4507315   | 0.549980586 | 1.30717929  |
| ENSMUSG000000086580 | -0.549328609 | 0.582112927  | 0.478505956 | 0.489099838 | 0.999071534 | Gm15280       | Gm15280       |           | 1.403600671 | 0.889350666 | 1.211763966 | 3.677251647 | 1.046440986 | 1.309718907 | 0.258861174 | 1.588896405 | 0           | 2.352922722 |
| ENSMUSG000000096977 | 0.435167424  | 1.364801008  | 0.478243917 | 0.489218829 | 0.999071534 | Gm10827       | Gm10827       |           | 2.315941107 | 1.363671021 | 3.164050356 | 2.775284262 | 1.111843547 | 1.309718907 | 0.841298815 | 1.174401691 | 3.142746204 | 6.666614379 |
| ENSMUSG000000031198 | 0.19102323   | 7.23581939   | 0.478219457 | 0.489229938 | 0.999071534 | Fundc2        | Fundc2        | FUNDC2    | 127.4469409 | 143.4226174 | 144.9404344 | 152.9181628 | 160.4324836 | 98.08339373 | 203.529598  | 198.6811331 | 106.381959  | 159.4758734 |
| ENSMUSG000000035818 | -0.511231486 | 0.233803407  | 0.478190818 | 0.489242947 | 0.999071534 | Plekhs1       | Plekhs1       | PLEKHS1   | 2.807201342 | 0.830060622 | 1.413724627 | 0.832585279 | 0.523220493 | 0.363810808 | 0.258861174 | 1.4507315   | 0.707117896 | 1.241820326 |
| ENSMUSG000000024011 | 0.34483941   | 1.254672947  | 0.477880228 | 0.489384058 | 0.999071534 | Pl16          | Pl16          | PI16      | 3.298461576 | 2.075151554 | 2.288887492 | 0.901967385 | 1.831271725 | 3.856394561 | 2.329750565 | 1.865226215 | 2.121353688 | 2.222204793 |
| ENSMUSG000000031897 | -0.20832085  | 7.226867113  | 0.477847958 | 0.489398724 | 0.999071534 | Psmb10        | Psmb10        | PSMB10    | 199.8727355 | 90.47660777 | 194.7573974 | 207.9381733 | 135.2524974 | 171.8642255 | 101.9913025 | 83.65884985 | 133.252439  | 180.2600241 |
| ENSMUSG000000047036 | -0.480487841 | 2.455363634  | 0.477725924 | 0.489454189 | 0.999071534 | Zfp445        | Zfp445        | ZNF445    | 6.877643287 | 13.51813012 | 3.837252559 | 3.191576901 | 5.101399804 | 10.91432423 | 7.636404631 | 3.17779281  | 0           | 1.830051006 |
| ENSMUSG000000082926 | 0.749657881  | -0.546659967 | 0.477558915 | 0.489530113 | 0.999071534 | Gm8172        | Gm8172        |           | 1.052700503 | 0.5336104   | 0.336601102 | 0.20814632  | 0           | 0           | 1.48845175  | 0.345412262 | 0.15713731  | 1.30717929  |
| ENSMUSG000000018322 | -0.156571159 | 5.088605858  | 0.477504664 | 0.489554781 | 0.999071534 | Tomm34        | Tomm34        | TOMM34    | 39.37099882 | 34.56609589 | 40.45945243 | 29.07110264 | 42.70787272 | 52.97085359 | 27.56871502 | 28.46197039 | 20.11357571 | 30.58799539 |
| ENSMUSG000000039994 | 0.205127754  | 4.727366656  | 0.4774469   | 0.489581048 | 0.999071534 | Timeless      | Timeless      | TIMELLESS | 34.80929664 | 15.17825137 | 24.90848153 | 21.57783514 | 31.13161932 | 47.36816715 | 23.23279036 | 14.09282029 | 28.04900987 | 25.88214994 |
| ENSMUSG000000018547 | -0.167910645 | 5.383543243  | 0.477355601 | 0.489622569 | 0.999071534 | Pip4k2b       | Pip4k2b       | PIP4K2B   | 46.66972231 | 48.91428664 | 44.56598587 | 37.39695543 | 51.73342622 | 73.27149665 | 29.769035   | 26.73490908 | 33.47024707 | 31.69909778 |
| ENSMUSG000000022534 | -0.287877621 | 2.634031779  | 0.477341838 | 0.489628828 | 0.999071534 | Mefv          | Mefv          | MEFV      | 9.193584394 | 9.367827016 | 4.241173882 | 4.995511672 | 7.063476652 | 8.658697221 | 7.571689337 | 4.144947144 | 1.807079067 | 5.359435089 |
| ENSMUSG000000003208 | -0.351825378 | 2.360780252  | 0.477339386 | 0.489629944 | 0.999071534 | Ccdc94        | Ccdc94        | CCDC94    | 7.93034379  | 6.04758453  | 3.567971678 | 5.064893778 | 6.605658721 | 10.11394045 | 6.083237587 | 4.006782239 | 1.492804447 | 0.980384468 |
| ENSMUSG000000003234 | -0.147503212 | 5.246247405  | 0.476970637 | 0.489797707 | 0.999071534 | Abcf3         | Abcf3         | ABCF3     | 41.61675989 | 54.0725205  | 36.95880097 | 32.60959008 | 41.79223686 | 42.12929152 | 34.81682789 | 37.78810146 | 26.39906811 | 33.39843086 |
| ENSMUSG000000080186 | 0.865419371  | 0.184948095  | 0.476683979 | 0.48992819  | 0.999071534 | Gm14448       | Gm14448       |           | 0.98252047  | 0.830060622 | 0           | 0           | 1.896674286 | 3.492583753 | 2.653327033 | 0.690824524 | 0           | 0           |
| ENSMUSG000000023915 | -0.233401626 | 3.754008514  | 0.476601399 | 0.48996579  | 0.999071534 | Tnfrsf21      | Tnfrsf21      | TNFRSF21  | 13.26402634 | 20.04003501 | 15.61829112 | 11.93372233 | 14.25775843 | 25.24847005 | 14.94923279 | 8.566224097 | 5.342668547 | 8.627383315 |
| ENSMUSG000000059291 | 0.195707827  | 8.623971444  | 0.476496622 | 0.490013503 | 0.999071534 | Rpl11         | Rpl11         | RPL11     | 469.7149645 | 297.1617026 | 415.9043213 | 403.1794212 | 319.2299031 | 306.5469865 | 369.0713187 | 401.0927186 | 432.9132896 | 472.7413903 |
| ENSMUSG000000040297 | 0.166546717  | 5.414038953  | 0.476443536 | 0.49003768  | 0.999071534 | Suco          | Suco          | SUCO      | 35.37073691 | 57.03702272 | 38.43984582 | 29.6955416  | 48.33249302 | 44.60320501 | 52.03109596 | 54.50605494 | 32.52742321 | 33.39843086 |
| ENSMUSG000000006273 | -0.203111181 | 7.042045495  | 0.476360419 | 0.490075539 | 0.999071534 | Atp6v1b2      | Atp6v1b2      | ATP6V1B2  | 170.8883817 | 212.6733893 | 123.8018852 | 98.5225913  | 129.6932796 | 154.2557824 | 180.0379465 | 133.9508752 | 57.51225553 | 79.99937255 |
| ENSMUSG000000001995 | -0.199162059 | 4.043749289  | 0.476312494 | 0.49009737  | 0.999071534 | Sipa1l2       | Sipa1l2       | SIPA1L2   | 20.00130956 | 25.02039874 | 15.14704958 | 11.03175494 | 20.20939153 | 23.72046466 | 13.39606575 | 10.63869767 | 11.15674902 | 16.40510009 |
| ENSMUSG000000055670 | 0.155695582  | 5.917008579  | 0.47614824  | 0.490172205 | 0.999071534 | Zze1          | Zze1          | ZZEF1     | 58.03888774 | 53.12387979 | 71.02283246 | 51.75905149 | 62.39404376 | 67.52328589 | 40.96478077 | 60.6543932  | 66.4698221  | 67.18901551 |
| ENSMUSG000000026307 | -0.187466812 | 4.257821836  | 0.47611971  | 0.490185206 | 0.999071534 | Scly          | Scly          | SCLY      | 20.63292986 | 25.19826887 | 18.04181905 | 13.32136446 | 28.58091942 | 27.35857273 | 15.40223985 | 16.71795348 | 11.15674902 | 17.45084352 |
| ENSMUSG000000050100 | 0.36761286   | 1.346732049  | 0.475490339 | 0.49047214  | 0.999071534 | Hmx2          | Hmx2          | HMX2      | 3.859901845 | 0.889350666 | 2.154247051 | 1.387642131 | 2.746907587 | 3.34705943  | 2.9769035   | 1.174401691 | 2.985608894 | 2.61435858  |
| ENSMUSG000000025076 | -0.222356412 | 3.670301097  | 0.475263413 | 0.490575666 | 0.999071534 | Casp7         | Casp7         | CASP7     | 14.31672684 | 9.01208675  | 14.06992605 | 20.53710354 | 11.90326621 | 18.19054038 | 11.97232929 | 8.704389002 | 9.978219197 | 8.300588492 |
| ENSMUSG000000064147 | -0.387756468 | 2.170790491  | 0.475159751 | 0.49062297  | 0.999071534 | Rab44         | Rab44         | RAB44     | 7.860163757 | 10.07930755 | 4.779735644 | 0.624438959 | 2.681505025 | 2.619437815 | 3.17104938  | 2.901463001 | 4.00700141  | 5.097999231 |
| ENSMUSG000000008976 | 0.144460691  | 5.208511311  | 0.474725506 | 0.49082121  | 0.999071534 | Gabpa         | Gabpa         | GABPA     | 38.24811828 | 41.50303108 | 34.40063259 | 30.66689109 | 37.34486267 | 53.11637791 | 36.82300199 | 40.55139956 | 25.84908753 | 33.85594361 |
| ENSMUSG000000022142 | 0.158138336  | 5.888866247  | 0.474408057 | 0.490966215 | 0.999071534 | Nup155        | Nup155        | NUP155    | 71.72399428 | 49.8036373  | 56.14506377 | 54.81186417 | 58.01207214 | 96.26433969 | 71.51039929 | 37.30452429 | 40.38428872 | 64.50929797 |
| ENSMUSG000000046916 | -0.281320004 | 2.589510534  | 0.474169703 | 0.491075139 | 0.999071534 | Myct1         | Myct1         | MYCT1     | 4.070441945 | 6.521904885 | 8.818948865 | 6.452535909 | 7.586697145 | 6.403070214 | 7.053966989 | 2.763298096 | 5.892649132 | 3.398666154 |
| ENSMUSG000000047613 | 0.203778123  | 5.026752362  | 0.474159435 | 0.491079832 | 0.999071534 | A430005L14Rik | A430005L14Rik | C1orf174  | 43.79234093 | 21.46299608 | 30.89998114 | 29.97307003 | 30.73920395 | 30.05077271 | 63.80927937 | 22.17546722 | 24.51342039 | 27.45076509 |

|                     |              |              |             |             |             |              |          |              |             |             |              |             |             |             |             |             |             |             |
|---------------------|--------------|--------------|-------------|-------------|-------------|--------------|----------|--------------|-------------|-------------|--------------|-------------|-------------|-------------|-------------|-------------|-------------|-------------|
| ENSMUSG00000051359  | -0.656103551 | -0.265988732 | 0.474098735 | 0.491107577 | 0.999071534 | Ncald        | Ncald    | NCALD        | 2.596661241 | 1.007930755 | 0.740522424  | 0           | 0.130805123 | 1.091432423 | 0.711868228 | 0.414494714 | 0.235705965 | 0.261435858 |
| ENSMUSG00000040289  | -0.302091266 | 2.181992693  | 0.474022447 | 0.491142452 | 0.999071534 | Hey1         | Hey1     | HEY1         | 5.193322482 | 5.573264174 | 4.645095204  | 6.175007483 | 3.531738326 | 7.348978314 | 4.27120937  | 2.556050739 | 3.614158135 | 1.764692042 |
| ENSMUSG00000029775  | -0.179514898 | 5.128737415  | 0.473976845 | 0.4911633   | 0.999071534 | Klhdc10      | Klhdc10  | KLHDC10      | 45.68720184 | 40.91013064 | 35.47775612  | 30.59750899 | 40.28797794 | 61.70231297 | 38.89389138 | 23.55711627 | 16.9708295  | 24.3135348  |
| ENSMUSG00000019188  | -0.169787611 | 7.420631467  | 0.473474198 | 0.491393202 | 0.999071534 | H13          | H13      | HM13         | 162.4667776 | 175.9135618 | 220.6756823  | 205.8567101 | 172.8589703 | 177.2486255 | 135.3196787 | 180.650613  | 110.3889604 | 179.2142807 |
| ENSMUSG00000000028  | 0.16714634   | 5.276954344  | 0.473457286 | 0.49140094  | 0.999071534 | Cdc45        | Cdc45    | CDC45        | 44.7748614  | 23.77530781 | 37.63200317  | 42.66999553 | 39.76475745 | 56.46343734 | 44.78298309 | 26.52766172 | 36.06301269 | 35.62063566 |
| ENSMUSG00000008193  | 0.642030762  | -0.204910856 | 0.473422489 | 0.491416863 | 0.999071534 | Spib         | Spib     | CTD-2545M3.6 | 0.842160403 | 0.770770577 | 0.740522424  | 0           | 0.719428178 | 0.509335131 | 1.100159989 | 0.069082452 | 1.964216377 | 0.457512752 |
| ENSMUSG00000098318  | 0.259545827  | 3.65348271   | 0.473061557 | 0.491582071 | 0.999071534 | RP23-45G16.5 | Lockd    |              | 15.08870721 | 4.683913508 | 13.93528561  | 15.61097397 | 9.156358623 | 10.11394045 | 14.04321869 | 9.049801264 | 16.89226085 | 13.3322876  |
| ENSMUSG00000025887  | 0.179027605  | 5.128204211  | 0.473007684 | 0.491606738 | 0.999071534 | Casp12       | Casp12   | CASP12       | 32.70389563 | 26.79910007 | 40.39213221  | 35.45425645 | 33.94392947 | 26.8492376  | 29.51017383 | 53.81523041 | 31.50603069 | 33.52914879 |
| ENSMUSG00000052557  | 0.254498721  | 4.823645949  | 0.472678459 | 0.491757526 | 0.999071534 | Gan          | Gan      | GAN          | 19.36968926 | 12.45090933 | 39.11304802  | 36.49498804 | 24.78757084 | 27.50409706 | 11.64875283 | 27.77114586 | 41.16997527 | 34.83632808 |
| ENSMUSG00000035310  | 0.182126859  | 4.401451947  | 0.472545491 | 0.491818449 | 0.999071534 | Lin54        | Lin54    | LIN54        | 22.10671057 | 19.26926443 | 22.88887492  | 15.95788451 | 22.23687094 | 27.50409706 | 29.63960441 | 17.2706131  | 20.27071302 | 13.46394669 |
| ENSMUSG00000012640  | 0.246559553  | 3.520457727  | 0.472153442 | 0.491998149 | 0.999071534 | Zfp715       | Zfp715   |              | 11.36916543 | 18.5577839  | 6.866662475  | 9.435966491 | 7.717502268 | 12.80614043 | 15.40223985 | 11.88218181 | 5.421237202 | 14.96720287 |
| ENSMUSG00000090329  | 1.026303467  | -0.632404995 | 0.472107857 | 0.492019051 | 0.999071534 | Gm17160      | Gm17160  |              | 0           | 0           | 0.942483085  | 0.832585279 | 0           | 0.363810808 | 0           | 1.243484143 | 1.571373102 | 0           |
| ENSMUSG00000015668  | 0.151793824  | 6.097771523  | 0.472087218 | 0.492028514 | 0.999071534 | Pdxd11       | Pdxd11   | PDZD11       | 64.70599093 | 61.78022627 | 67.99342255  | 69.17396023 | 72.204428   | 57.77315625 | 85.94190974 | 64.17759827 | 64.66200315 | 69.93409202 |
| ENSMUSG00000031634  | -0.147657223 | 5.228046431  | 0.471954071 | 0.492089575 | 0.999071534 | Ufsp2        | Ufsp2    | UFSP2        | 42.31856023 | 43.40031251 | 37.02612119  | 33.09526482 | 48.72490839 | 38.56394561 | 39.6704749  | 37.4426892  | 21.99922343 | 35.09776394 |
| ENSMUSG00000026355  | 0.23898565   | 6.246459149  | 0.471767829 | 0.492175007 | 0.999071534 | Mcm6         | Mcm6     | MCM6         | 102.533029  | 61.00945569 | 63.81956888  | 63.90092013 | 70.70016909 | 188.4539983 | 110.5337213 | 29.98178434 | 34.80591421 | 61.17599078 |
| ENSMUSG00000043795  | 0.555317069  | 0.147761176  | 0.471696299 | 0.492207825 | 0.999071534 | Gm14492      | Prr33    |              | 1.19306057  | 0.889350666 | 0.336601102  | 0.555056852 | 1.111843547 | 2.546675653 | 1.747312924 | 1.243484143 | 0           | 0.457512752 |
| ENSMUSG00000024098  | -0.157168915 | 6.948139791  | 0.471588825 | 0.492257141 | 0.999071534 | Twsg1        | Twsg1    | TWSG1        | 101.6206886 | 172.7711894 | 125.1482896  | 127.2467834 | 148.6600225 | 143.1959339 | 110.7278671 | 116.4730147 | 88.15403102 | 109.4109066 |
| ENSMUSG00000058900  | 0.398408995  | 1.3414427    | 0.471452168 | 0.492319861 | 0.999071534 | Rsl1         | Rsl1     |              | 2.807201342 | 2.134441599 | 0.201960661  | 2.497755836 | 3.139322957 | 2.037340523 | 2.912188207 | 3.315957715 | 1.885647722 | 2.941153403 |
| ENSMUSG00000049807  | -0.154042783 | 5.321764847  | 0.471418426 | 0.492335349 | 0.999071534 | Arhgap23     | Arhgap23 | ARHGAP23     | 40.91495955 | 51.16730832 | 44.49866565  | 33.44217536 | 48.72490839 | 56.5361995  | 26.85684679 | 40.55139956 | 25.69195022 | 36.53566116 |
| ENSMUSG00000020866  | 0.66446332   | 0.357828065  | 0.471415166 | 0.492336845 | 0.999071534 | Cacna1g      | Cacna1g  | CACNA1G      | 1.473780704 | 0.592900444 | 1.211763966  | 0.277528426 | 1.046440986 | 3.056010784 | 3.494625848 | 0           | 0           | 0.784307574 |
| ENSMUSG00000038034  | -0.163087059 | 6.610601915  | 0.471377003 | 0.492354364 | 0.999071534 | Igsf8        | Igsf8    | IGSF8        | 107.4456314 | 104.4690582 | 92.56530297  | 84.64616999 | 148.6600225 | 84.3313452  | 77.07591453 | 118.6836532 | 66.78335683 | 95.81624196 |
| ENSMUSG00000024242  | 0.165790918  | 4.91683214   | 0.471144995 | 0.492460889 | 0.999071534 | Map4k3       | Map4k3   | MAP4K3       | 26.66841275 | 33.20242487 | 30.89998114  | 22.82671305 | 34.07473459 | 33.10678349 | 34.42853613 | 41.24222408 | 16.89226085 | 29.54225196 |
| ENSMUSG00000092981  | -0.47554431  | 0.264141313  | 0.471131041 | 0.492467297 | 0.999071534 | Mir5125      | Mir5125  |              | 1.965040939 | 0.711480533 | 0.6058881983 | 2.01208109  | 1.111843547 | 0.509335131 | 0.711868228 | 1.243484143 | 0.31427462  | 1.503256184 |
| ENSMUSG00000030271  | 0.257174862  | 3.030758493  | 0.470953739 | 0.492548731 | 0.999071534 | Ogg1         | Ogg1     | OGG1         | 10.52700503 | 8.656346483 | 4.981696305  | 7.562649614 | 6.344048475 | 13.2427134  | 12.74891282 | 5.595678644 | 6.128355098 | 5.620870947 |
| ENSMUSG00000068335  | -0.163009905 | 5.922392758  | 0.470768169 | 0.492633987 | 0.999071534 | Dok1         | Dok1     | DOK1         | 68.2149926  | 47.01700521 | 82.66923058  | 73.19812241 | 59.71253874 | 88.6970749  | 68.66292638 | 43.79827482 | 33.54881573 | 49.73817199 |
| ENSMUSG00000024970  | -0.15688477  | 4.561673955  | 0.470548692 | 0.492734853 | 0.999071534 | Al846148     | Al846148 | C11orf84     | 29.19489395 | 22.8266671  | 27.87057122  | 23.38176991 | 25.3761939  | 25.32123221 | 21.74433861 | 23.28078646 | 16.73512354 | 20.65343278 |
| ENSMUSG00000033987  | -0.471137751 | 0.702136277  | 0.470471156 | 0.492770494 | 0.999071534 | Dnah17       | Dnah17   | DNAH17       | 2.245761073 | 1.363671021 | 1.279084186  | 1.873316877 | 2.223687094 | 1.018670261 | 1.035444696 | 1.796143762 | 0           | 2.287563758 |
| ENSMUSG00000020122  | -0.176829658 | 4.792882938  | 0.470437148 | 0.492786129 | 0.999071534 | Egfr         | Egfr     | EGFR         | 21.3347302  | 33.79532531 | 38.43984582  | 27.19778577 | 31.13161932 | 42.12929152 | 20.19117157 | 26.38949681 | 21.05639957 | 17.84299731 |
| ENSMUSG00000060798  | 0.248996125  | 3.11494747   | 0.470117799 | 0.492932981 | 0.999071534 | Intu         | Intu     | INTU         | 7.368903522 | 5.869714396 | 7.87646578   | 9.505348597 | 9.744981678 | 8.367648575 | 5.241938772 | 13.0565835  | 8.406846095 | 9.019537102 |
| ENSMUSG00000038777  | -0.327587351 | 2.368039338  | 0.469920693 | 0.493023656 | 0.999071534 | Sema6c       | Sema6c   | SEMA6C       | 5.965302851 | 5.276813952 | 5.654898509  | 5.203657991 | 6.998074091 | 2.692199976 | 2.329750565 | 7.875399573 | 1.414235792 | 7.189486096 |
| ENSMUSG00000080303  | -0.662681138 | 0.278288505  | 0.469663361 | 0.493142079 | 0.999071534 | Gm12419      | Gm12419  |              | 0.210540101 | 1.837991377 | 1.817645949  | 0.555056852 | 2.419894779 | 0.9459081   | 2.006174098 | 1.174401691 | 0           | 0           |
| ENSMUSG000000026107 | 0.161619297  | 5.772186996  | 0.469440214 | 0.493244809 | 0.999071534 | Nabp1        | Nabp1    | NABP1        | 55.79312667 | 63.49963756 | 37.43004251  | 39.33965441 | 72.79305106 | 50.06036713 | 62.5149735  | 66.94089637 | 41.01283796 | 56.3394274  |
| ENSMUSG00000024423  | 0.173144809  | 5.267985982  | 0.469392528 | 0.493266767 | 0.999071534 | Impact       | Impact   | IMPACT       | 27.79129328 | 48.14351606 | 37.36272229  | 26.36520049 | 48.59410327 | 33.4705943  | 36.6935714  | 53.2625708  | 30.17036356 | 41.2415066  |
| ENSMUSG00000025732  | 0.273829581  | 3.165288039  | 0.469261166 | 0.493327263 | 0.999071534 | Fam195a      | Fam195a  | MCRIP2       | 9.684844629 | 4.683913508 | 11.10783636  | 9.85225913  | 6.017035667 | 8.804221544 | 13.9137881  | 4.490359406 | 10.76390575 | 7.97379367  |
| ENSMUSG00000044155  | 0.185651335  | 6.312661041  | 0.468616819 | 0.493624186 | 0.999071534 | Naa38        | Lsm8     | LSM8         | 71.44327415 | 44.28966317 | 108.0489536  | 92.69449435 | 66.64521027 | 80.76599929 | 78.56436628 | 62.03604225 | 94.04668015 | 84.705218   |
| ENSMUSG00000027102  | -0.336549421 | 1.589813412  | 0.468564004 | 0.493648537 | 0.999071534 | Hoxd8        | Hoxd8    | HOXD8        | 2.245761073 | 3.972432975 | 4.914376085  | 2.567137942 | 2.943115272 | 4.656778337 | 3.300479967 | 2.348803381 | 1.178529826 | 1.30717929  |
| ENSMUSG00000024309  | 0.187668401  | 6.318537475  | 0.468482639 | 0.493686055 | 0.999071534 | H2-Ke2       | Pfdn6    | PFDN6        | 65.33761123 | 43.10386228 | 113.1652904  | 83.60543839 | 80.05273539 | 68.90576696 | 70.73381577 | 78.54674837 | 88.70401161 | 93.65939614 |
| ENSMUSG00000039131  | -0.382402342 | 1.291918098  | 0.468424729 | 0.493712761 | 0.999071534 | Gipc2        | Gipc2    | GIPC2        | 4.842422314 | 2.253021687 | 3.096730136  | 1.179495811 | 2.354492217 | 3.929156722 | 1.229590576 | 1.72706131  | 2.278490998 | 0.71894861  |
| ENSMUSG00000018398  | -0.170141683 | 6.237104238  | 0.46829974  | 0.493770409 | 0.999071534 | 8-Sep        | 8-Sep    | 8-Sep        | 83.65459998 | 121.6038811 | 68.33002365  | 48.28994616 | 95.22612968 | 109.6525774 | 72.54584399 | 64.17759827 | 45.80552592 | 59.34593977 |

|                    |              |              |             |             |             |               |               |          |  |             |             |             |             |             |             |             |             |             |             |
|--------------------|--------------|--------------|-------------|-------------|-------------|---------------|---------------|----------|--|-------------|-------------|-------------|-------------|-------------|-------------|-------------|-------------|-------------|-------------|
| ENSMUSG00000074978 | -0.533744747 | 2.227172102  | 0.468248943 | 0.493793842 | 0.999071534 | Actg-ps1      | Actg-ps1      |          |  | 8.91286426  | 11.26510844 | 1.88496617  | 1.80393477  | 4.316569065 | 10.04117829 | 7.053966989 | 0.828989429 | 0           | 1.895409971 |
| ENSMUSG00000031487 | -0.25356921  | 2.779502789  | 0.468190054 | 0.493821009 | 0.999071534 | Brf2          | Brf2          | BRF2     |  | 9.263764428 | 7.114805329 | 4.847055865 | 8.117706466 | 8.698540692 | 9.677367482 | 7.44225875  | 4.006782239 | 3.8498641   | 5.555511983 |
| ENSMUSG00000053253 | 0.156433444  | 6.137212789  | 0.468118297 | 0.493854116 | 0.999071534 | Ndfip2        | Ndfip2        | NDFIP2   |  | 74.95227582 | 70.25870262 | 66.24309682 | 60.57057902 | 73.64328436 | 59.73773461 | 96.16692611 | 85.24774625 | 54.44807798 | 59.41129873 |
| ENSMUSG00000033430 | 0.164112576  | 4.530790882  | 0.467901408 | 0.493954206 | 0.999071534 | Terf2ip       | Terf2ip       | TERF2IP  |  | 17.75554849 | 24.60536843 | 22.68691426 | 23.45115201 | 23.80653242 | 26.33990247 | 20.77360921 | 23.00445665 | 23.02061594 | 23.39850929 |
| ENSMUSG00000016253 | -0.195191448 | 4.321582623  | 0.467731908 | 0.494032452 | 0.999071534 | Nelfcd        | Nelfcd        | NELFCD   |  | 27.86147332 | 21.2258359  | 24.36991976 | 18.24749402 | 18.63973005 | 26.8492376  | 25.62725622 | 10.91502748 | 9.349669957 | 19.60768935 |
| ENSMUSG00000042589 | 0.457465427  | 1.463583527  | 0.467645133 | 0.494072517 | 0.999071534 | Cux2          | Cux2          | CUX2     |  | 0.98252047  | 0.592900444 | 4.241173882 | 3.81601586  | 1.765869163 | 1.528005392 | 0.776583522 | 2.832380548 | 5.971217787 | 2.548999616 |
| ENSMUSG00000030685 | -0.212781545 | 3.750515514  | 0.467186634 | 0.494284304 | 0.999071534 | Kctd13        | Kctd13        | KCTD13   |  | 14.17636678 | 9.071376794 | 16.69541464 | 16.65170557 | 17.52788651 | 18.55435119 | 12.9430587  | 13.95465538 | 6.049786443 | 9.934562605 |
| ENSMUSG00000024764 | 0.169837059  | 4.626732973  | 0.467159398 | 0.494296889 | 0.999071534 | Naa40         | Naa40         | NAA40    |  | 23.15941107 | 20.87009563 | 25.04312197 | 20.74524986 | 30.54299627 | 43.58453475 | 20.90303979 | 19.68849893 | 21.21353688 | 23.26779136 |
| ENSMUSG00000074480 | 0.224683168  | 5.64503918   | 0.466977666 | 0.494380879 | 0.999071534 | Mex3a         | Mex3a         | MEX3A    |  | 30.94939479 | 35.27757642 | 67.65682144 | 54.32618943 | 49.50973913 | 55.95410221 | 17.47312924 | 58.23650737 | 64.97627777 | 56.86229912 |
| ENSMUSG00000014763 | 0.167084238  | 5.054565366  | 0.466830587 | 0.494448871 | 0.999071534 | Fam120b       | Fam120b       | FAM120B  |  | 32.28281543 | 37.58988815 | 24.36991976 | 23.72868044 | 44.86615725 | 29.6869619  | 29.769035   | 37.78810146 | 30.17036356 | 39.60753249 |
| ENSMUSG00000034032 | -0.194757175 | 3.849819434  | 0.466816942 | 0.49445518  | 0.999071534 | Rpap1         | Rpap1         | RPAP1    |  | 19.65040939 | 13.69600026 | 15.95489222 | 13.46012867 | 16.61225065 | 19.79130793 | 8.542418739 | 12.22759407 | 9.821081887 | 15.16327977 |
| ENSMUSG00000032204 | -0.528908343 | 0.525011038  | 0.466736845 | 0.494492215 | 0.999071534 | Aqp9          | Aqp9          | AQP9     |  | 3.579181711 | 1.600831199 | 1.211763966 | 0.485674746 | 1.177246109 | 1.673529715 | 2.394465859 | 0.552659619 | 0           | 0.784307574 |
| ENSMUSG00000053797 | 0.600051253  | -0.177231787 | 0.466707563 | 0.494505756 | 0.999071534 | Krt16         | Krt16         | KRT16    |  | 0.631620302 | 1.48225111  | 0.740522424 | 0           | 0.261610246 | 0.727621615 | 0.517722348 | 0.345412262 | 0.785686551 | 1.960768935 |
| ENSMUSG00000074149 | 0.442186878  | 0.574495557  | 0.466643603 | 0.494535334 | 0.999071534 | Gm10634       | Gm10634       |          |  | 0.561440268 | 1.422961066 | 2.086926831 | 0.832585279 | 1.046440986 | 1.382481069 | 2.329750565 | 2.694215643 | 0.549980586 | 0.653589645 |
| ENSMUSG00000039515 | -0.188575032 | 7.191593507  | 0.466632886 | 0.494540291 | 0.999071534 | Ppp2r4        | Ppp2r4        | PTPA     |  | 227.7342088 | 130.0823574 | 158.1351976 | 155.0690081 | 137.2145742 | 228.3276629 | 154.7342667 | 75.1617082  | 93.81097419 | 128.822519  |
| ENSMUSG00000026159 | 0.139957634  | 6.078617984  | 0.466547716 | 0.494579683 | 0.999071534 | Agfg1         | Agfg1         | AGFG1    |  | 66.46049176 | 69.19148182 | 67.05093946 | 54.74248207 | 76.71720475 | 85.56830195 | 77.72306747 | 68.73704013 | 55.70517646 | 56.01263258 |
| ENSMUSG00000022109 | 0.166954819  | 4.906977466  | 0.466512033 | 0.494596188 | 0.999071534 | Med4          | Med4          | MED4     |  | 27.65093322 | 27.56987065 | 29.28429585 | 31.98515112 | 29.23494503 | 36.23555644 | 37.47015492 | 23.00445665 | 33.54881573 | 21.11094554 |
| ENSMUSG00000043557 | -0.50327053  | 0.110946847  | 0.46647418  | 0.494613698 | 0.999071534 | Mdga1         | Mdga1         | MDGA1    |  | 1.754500839 | 1.541541155 | 0.942483085 | 1.248877918 | 0.261610246 | 1.528005392 | 0.453007054 | 0.345412262 | 1.099961171 | 0.392153787 |
| ENSMUSG00000021113 | -0.200732296 | 3.506168405  | 0.466446537 | 0.494626486 | 0.999071534 | Snappc1       | Snappc1       | SNAPC1   |  | 10.6673651  | 11.38368853 | 14.8777687  | 12.97445392 | 12.29568158 | 12.22404314 | 9.707294022 | 9.740625788 | 7.542590889 | 11.63389568 |
| ENSMUSG00000082260 | -0.427248308 | 0.322054449  | 0.466409299 | 0.494643713 | 0.999071534 | Gm7429        | Gm7429        |          |  | 1.052700503 | 1.067220799 | 1.144443746 | 2.150845303 | 1.177246109 | 0.654859454 | 1.100159989 | 0.621742072 | 1.178529826 | 0.915025503 |
| ENSMUSG00000039683 | 0.489854292  | 0.294142878  | 0.466316221 | 0.494686779 | 0.999071534 | Sdk1          | Sdk1          | SDK1     |  | 0.140360067 | 1.897281421 | 0.269280881 | 1.248877918 | 1.111843547 | 1.600767553 | 1.359021163 | 1.105319238 | 0.707117896 | 1.503256184 |
| ENSMUSG00000029836 | 0.189796846  | 7.947305154  | 0.466114406 | 0.494780176 | 0.999071534 | Cbx3          | Cbx3          | CBX3     |  | 169.414601  | 175.0242111 | 306.3743228 | 277.1815157 | 262.9182976 | 273.1491544 | 232.4573342 | 231.8407102 | 264.5406617 | 253.0699106 |
| ENSMUSG00000045205 | 0.160658366  | 5.508286328  | 0.466044801 | 0.494812395 | 0.999071534 | Dpy19l4       | Dpy19l4       | DPY19L4  |  | 37.47613791 | 44.58611339 | 43.48886234 | 49.60820618 | 46.69742898 | 34.85307537 | 54.6197077  | 51.19009722 | 45.33411399 | 40.52255799 |
| ENSMUSG00000061451 | 0.395688198  | 0.653243119  | 0.465059253 | 0.495268968 | 0.999071534 | Tmem151a      | Tmem151a      | TMEM151A |  | 1.894860906 | 0.830060622 | 1.615685288 | 1.040731598 | 1.111843547 | 1.8918162   | 0.970729402 | 2.348803381 | 1.728510412 | 0.915025503 |
| ENSMUSG00000047141 | 0.238837101  | 3.746394362  | 0.465021499 | 0.495286472 | 0.999071534 | Zfp654        | Zfp654        | ZNF654   |  | 13.33420637 | 20.63293545 | 10.16535327 | 5.203657991 | 14.58477124 | 12.87890259 | 15.14337867 | 19.48125158 | 8.01400282  | 14.1828953  |
| ENSMUSG00000028234 | 0.221140239  | 9.455282811  | 0.464815507 | 0.495381997 | 0.999071534 | Rps20         | Rps20         | RPS20    |  | 630.7781415 | 462.6995066 | 835.309294  | 878.0305584 | 532.5730591 | 439.1924069 | 645.3409066 | 706.713488  | 903.0681217 | 809.6014933 |
| ENSMUSG00000006920 | -0.199388377 | 4.658244927  | 0.464640662 | 0.495463102 | 0.999071534 | Ezh1          | Ezh1          | EZH1     |  | 27.51057315 | 40.19865011 | 17.70521795 | 24.63064782 | 29.69276296 | 19.20921064 | 15.53167044 | 35.30113317 | 18.14935933 | 23.33315033 |
| ENSMUSG00000017707 | -0.172795008 | 8.382956049  | 0.464632513 | 0.495466883 | 0.999071534 | Serinc3       | Serinc3       | SERINC3  |  | 350.9703477 | 424.1016876 | 312.7024235 | 381.9484966 | 364.6846835 | 433.2259097 | 368.035874  | 259.4736912 | 206.7141316 | 279.5402912 |
| ENSMUSG00000048878 | -0.16470139  | 5.458719154  | 0.464427846 | 0.495561852 | 0.999071534 | Hexim1        | Hexim1        | HEXIM1   |  | 34.24785637 | 39.54645962 | 48.40323843 | 57.58714844 | 59.90874642 | 50.78798874 | 28.7983056  | 48.28863422 | 29.07040239 | 44.57481379 |
| ENSMUSG00000005103 | -0.186042314 | 8.710445906  | 0.464402231 | 0.495573739 | 0.999071534 | Wdr1          | Wdr1          | WDR1     |  | 518.1391876 | 488.4313858 | 476.8964409 | 378.2712449 | 458.4719568 | 696.3338858 | 405.3765984 | 257.3321352 | 275.1474302 | 324.4418998 |
| ENSMUSG00000020143 | -0.383744157 | 3.542307171  | 0.464330034 | 0.495607249 | 0.999071534 | Dock2         | Dock2         | DOCK2    |  | 18.03626862 | 20.57364541 | 6.664701814 | 10.12978756 | 12.62269439 | 29.75972406 | 8.218842272 | 9.464295978 | 0.471411931 | 5.686229912 |
| ENSMUSG00000024512 | 0.165751163  | 7.113215881  | 0.46423908  | 0.495649469 | 0.999071534 | Dynap         | Dynap         |          |  | 142.3952881 | 158.897319  | 124.2731268 | 118.2271096 | 134.4022641 | 120.712426  | 182.7559888 | 139.2011416 | 102.2178203 | 159.0183606 |
| ENSMUSG00000024067 | 0.200079     | 5.798403145  | 0.464152211 | 0.495689799 | 0.999071534 | Dpy30         | Dpy30         | DPY30    |  | 72.63633472 | 37.6491782  | 45.37382851 | 59.59922953 | 52.77986721 | 63.59412917 | 110.2748601 | 41.10405917 | 27.89187256 | 49.80353095 |
| ENSMUSG00000008855 | -0.205164413 | 5.82031759   | 0.464054766 | 0.495735045 | 0.999071534 | Hdac5         | Hdac5         | HDAC5    |  | 58.38978791 | 81.10878075 | 53.04833363 | 54.25680732 | 67.29923588 | 35.65345915 | 22.90921389 | 78.89216063 | 47.29833037 | 61.82958042 |
| ENSMUSG00000021767 | 0.204476661  | 4.464521544  | 0.46401081  | 0.495755457 | 0.999071534 | Kat6b         | Kat6b         | KAT6B    |  | 19.36968926 | 27.33271047 | 17.30129663 | 17.62305506 | 24.5259606  | 19.8640701  | 11.06631518 | 27.01123889 | 25.69195022 | 26.99325234 |
| ENSMUSG00000033368 | 0.568814658  | -0.018720622 | 0.463974169 | 0.495772474 | 0.999071534 | Trim69        | Trim69        | TRIM69   |  | 0.280720134 | 0.770770577 | 0.471241542 | 0.901967385 | 1.111843547 | 0.509335131 | 0.323576467 | 1.934308667 | 0.078568655 | 2.091486864 |
| ENSMUSG00000052763 | 0.191792247  | 3.946158699  | 0.463921881 | 0.495796758 | 0.999071534 | Zfp212        | Zfp212        | ZNF212   |  | 12.91312617 | 15.71186177 | 14.20456649 | 15.95788451 | 15.10799173 | 17.24463228 | 9.901439902 | 17.06336574 | 15.24231909 | 18.62730488 |
| ENSMUSG00000062991 | 0.207808586  | 3.798067616  | 0.463708975 | 0.495895661 | 0.999071534 | Nrg1          | Nrg1          | NRG1     |  | 10.2462849  | 19.03210425 | 15.34901024 | 11.37866547 | 10.33360473 | 19.50025929 | 10.28973166 | 16.02712896 | 13.8280833  | 11.82997258 |
| ENSMUSG00000091089 | -0.667646756 | -0.406617677 | 0.463564664 | 0.495962718 | 0.999071534 | A930018M24Rik | A930018M24Rik |          |  | 1.403600671 | 1.126510844 | 0.538561763 | 0           | 0.981038424 | 0.218286485 | 0.129430587 | 0.138164905 | 1.178529826 | 0.457512752 |

|                     |              |              |             |             |             |          |          |             |             |             |             |             |             |             |             |             |             |             |
|---------------------|--------------|--------------|-------------|-------------|-------------|----------|----------|-------------|-------------|-------------|-------------|-------------|-------------|-------------|-------------|-------------|-------------|-------------|
| ENSMUSG00000048832  | -0.25364994  | 3.89995679   | 0.463384909 | 0.496046266 | 0.999071534 | Vps37c   | Vps37c   | VPS37C      | 22.52779077 | 25.73187927 | 9.424830848 | 10.06040545 | 16.48144552 | 26.33990247 | 13.20191987 | 13.74740803 | 4.32127603  | 11.30710086 |
| ENSMUSG000000024695 | 0.188666897  | 7.059281324  | 0.463186128 | 0.496138685 | 0.999071534 | Zfp91    | Zfp91    | ZFP91       | 98.25204696 | 112.7103744 | 169.579635  | 132.3810593 | 131.8515642 | 140.2854474 | 82.90029095 | 134.5035348 | 166.0941369 | 145.9465677 |
| ENSMUSG000000028633 | 0.207940385  | 6.208698926  | 0.463142459 | 0.496158991 | 0.999071534 | Ctps     | Ctps     | CTPS1       | 89.69008287 | 79.62652964 | 69.67642805 | 53.42422204 | 64.74853598 | 153.3826365 | 112.3457495 | 35.02480336 | 50.67678254 | 48.62706959 |
| ENSMUSG000000027613 | -0.299408265 | 7.057643396  | 0.463066158 | 0.496194476 | 0.999071534 | Elf6     | Elf6     | EIF6        | 254.7535218 | 192.8705145 | 77.55289383 | 100.6040545 | 142.9699996 | 274.4588733 | 190.521824  | 53.53890061 | 25.14196963 | 80.84903909 |
| ENSMUSG000000037712 | 0.182304844  | 7.176445202  | 0.463019585 | 0.496216137 | 0.999071534 | Fermt2   | Fermt2   | FERMT2      | 96.98880635 | 193.7005751 | 143.1227884 | 123.2226212 | 146.4363354 | 145.0149879 | 113.7047706 | 198.6120506 | 135.6094987 | 140.2603378 |
| ENSMUSG000000019806 | -0.164445596 | 5.075843256  | 0.462514128 | 0.49645133  | 0.999071534 | Alg1     | Alg1     | ALG1        | 35.01983674 | 44.82327357 | 37.83396383 | 32.12391533 | 34.72876021 | 30.85115649 | 32.16350086 | 45.73258348 | 19.95643839 | 24.57497065 |
| ENSMUSG000000042225 | 0.189496102  | 5.54551441   | 0.46222491  | 0.49658599  | 0.999071534 | Ammecr1  | Ammecr1  | AMMECR1     | 30.59849462 | 34.03248549 | 70.01302916 | 50.44079146 | 39.5031472  | 51.66113468 | 33.32837614 | 42.69295558 | 59.55504056 | 47.3198903  |
| ENSMUSG000000098222 | -0.506651348 | -0.084542386 | 0.462017097 | 0.496682786 | 0.999071534 | Gm8318   | Gm8318   |             | 0.842160403 | 1.185800888 | 1.279084186 | 0.624438959 | 0.981038424 | 0.800383777 | 0.258861174 | 0.967154334 | 0.078568655 | 1.176461361 |
| ENSMUSG000000061544 | 0.295774642  | 2.834539098  | 0.461949005 | 0.496714509 | 0.999071534 | Zfp229   | Zfp229   |             | 2.947561409 | 6.403324796 | 8.684308424 | 4.995511672 | 9.679579116 | 9.386318836 | 6.471529348 | 5.941090906 | 10.92104306 | 3.725460977 |
| ENSMUSG000000024816 | -0.153894312 | 6.37272988   | 0.461924803 | 0.496725785 | 0.999071534 | FrmD8    | FrmD8    | FRMD8       | 98.25204696 | 90.59518785 | 84.68883719 | 75.14082139 | 105.2327216 | 102.0125505 | 52.16052654 | 89.80718811 | 49.96966464 | 90.26072998 |
| ENSMUSG000000020802 | -0.161948566 | 4.635884798  | 0.461668909 | 0.496845038 | 0.999071534 | Ube2o    | Ube2o    | UBE2O       | 31.44065503 | 32.55023438 | 23.4947569  | 21.64721724 | 26.94585538 | 32.45192404 | 18.8968657  | 25.14601267 | 14.84947581 | 23.59458619 |
| ENSMUSG000000030471 | 0.184579237  | 4.444884465  | 0.461566349 | 0.496892846 | 0.999071534 | Zdhhc13  | Zdhhc13  | ZDHHC13     | 26.94913288 | 16.30476221 | 21.07122897 | 20.39833933 | 20.53640434 | 24.44808627 | 32.61650791 | 18.79042705 | 20.58498764 | 14.44433116 |
| ENSMUSG000000089736 | -0.437689414 | 1.242401339  | 0.461521814 | 0.496913609 | 0.999071534 | Gm14378  | Tgfbr3l  | TGFBRL      | 1.473780704 | 2.134441599 | 3.231370576 | 5.203657991 | 1.046440986 | 0.9459081   | 0.388291761 | 2.486968286 | 1.571373102 | 3.529384083 |
| ENSMUSG000000027893 | -0.16171801  | 6.598846383  | 0.461306995 | 0.49701378  | 0.999071534 | Ahcyl1   | Ahcyl1   | AHCYL1      | 104.1471698 | 132.157509  | 84.21759565 | 80.41386149 | 132.4401872 | 137.0839123 | 107.0390954 | 80.96463421 | 53.58382278 | 75.35888607 |
| ENSMUSG000000051149 | -0.897046586 | 2.844092981  | 0.461246798 | 0.497041856 | 0.999071534 | Adnp     | Adnp     | ADNP        | 30.10723439 | 16.9569527  | 0.269280881 | 1.040731598 | 0           | 19.79130793 | 6.859821109 | 0           | 0           | 0.915025503 |
| ENSMUSG000000046230 | -0.303860465 | 3.600116204  | 0.461227521 | 0.497050848 | 0.999071534 | Vps13a   | Vps13a   | VPS13A      | 18.66788892 | 21.64086621 | 7.001302916 | 6.105625376 | 16.15443271 | 19.8640701  | 16.17882337 | 10.1551205  | 2.435628308 | 6.274460592 |
| ENSMUSG000000021072 | 0.191321429  | 6.635977591  | 0.461188607 | 0.497068999 | 0.999071534 | Tmx1     | Tmx1     | TMX1        | 122.8150587 | 100.3780452 | 86.57380336 | 73.82256137 | 100.1313218 | 136.7201015 | 186.3800452 | 72.88198728 | 58.21937343 | 70.13016891 |
| ENSMUSG000000023861 | 0.166747688  | 5.724248385  | 0.460879106 | 0.497213408 | 0.999071534 | Mpc1     | Mpc1     | MPC1        | 46.038102   | 37.94562842 | 57.35682773 | 59.87675795 | 55.78838504 | 42.85691314 | 75.84632396 | 41.86396615 | 48.31972289 | 57.05837601 |
| ENSMUSG000000008090 | -0.17494669  | 4.588633182  | 0.460868927 | 0.497218159 | 0.999071534 | Fgfr1l   | Fgfr1l   | FGFRL1      | 25.89643238 | 33.20242487 | 20.80194809 | 25.04694046 | 26.94585538 | 24.59361059 | 24.07408917 | 27.63298096 | 11.15674902 | 22.67956068 |
| ENSMUSG000000034205 | -0.242777011 | 5.371585139  | 0.460412068 | 0.497431455 | 0.999071534 | Lox12    | Lox12    | LOXL2       | 44.5643213  | 72.80817453 | 51.56728878 | 34.20537853 | 29.56195784 | 62.42993459 | 71.38096871 | 19.48125158 | 14.22092657 | 24.05209894 |
| ENSMUSG000000005150 | 0.184169805  | 4.034937425  | 0.46038684  | 0.497443238 | 0.999071534 | Wdr83    | Wdr83    | WDR83       | 15.79050755 | 11.56155866 | 19.99410544 | 15.74973819 | 15.82741991 | 18.3360647  | 13.78435751 | 16.16529386 | 14.37806388 | 20.71879175 |
| ENSMUSG000000035232 | -0.169403827 | 4.943976817  | 0.460297206 | 0.497485106 | 0.999071534 | Pdk3     | Pdk3     | PDK3        | 35.86199714 | 47.49132557 | 31.64050356 | 23.3132878  | 30.93541163 | 41.69271855 | 35.01097377 | 28.11655812 | 15.87086833 | 22.48348379 |
| ENSMUSG000000022508 | -0.210924933 | 4.575672544  | 0.460220423 | 0.497520976 | 0.999071534 | Bcl6     | Bcl6     | BCL6        | 24.63319177 | 33.9139054  | 16.83005509 | 29.97307003 | 26.48803745 | 19.93683226 | 12.23119047 | 34.5412262  | 13.67094599 | 25.55535512 |
| ENSMUSG000000017009 | -0.183383911 | 7.618244631  | 0.46002807  | 0.497610855 | 0.999071534 | Sdc4     | Sdc4     | SDC4        | 234.7522122 | 304.0393477 | 207.2789584 | 167.2802589 | 173.9054113 | 169.826885  | 206.5712168 | 231.0117208 | 123.1170825 | 157.0575917 |
| ENSMUSG000000022201 | 0.156516539  | 6.864956839  | 0.459882111 | 0.497679074 | 0.999071534 | Zfr      | Zfr      | ZFR         | 122.2536184 | 139.5687645 | 81.86138794 | 103.518103  | 125.8999311 | 144.7239393 | 117.1993965 | 105.2816574 | 117.538708  | 106.2083173 |
| ENSMUSG000000006344 | -0.331158248 | 1.6951996    | 0.459880922 | 0.49767963  | 0.999071534 | Ggt5     | Ggt5     | GGT5        | 4.702062247 | 3.438822576 | 2.221567271 | 5.064893778 | 2.419894779 | 4.584016176 | 3.300479967 | 1.105319238 | 2.042785033 | 2.61435858  |
| ENSMUSG000000035299 | 0.227222285  | 5.046246124  | 0.459588686 | 0.497816264 | 0.999071534 | Mid1     | Mid1     | MID1        | 22.3874307  | 30.47508283 | 27.66861056 | 29.6261595  | 47.54766228 | 26.8492376  | 12.61948223 | 53.46981815 | 30.56320683 | 44.50945483 |
| ENSMUSG000000028367 | 0.203153917  | 9.877470097  | 0.459410453 | 0.497899627 | 0.999071534 | Txn1     | Txn1     | TXN         | 967.5019424 | 532.0688585 | 1128.152252 | 1077.226586 | 812.1690099 | 775.2080689 | 1150.702633 | 801.1492004 | 1027.206597 | 1002.018285 |
| ENSMUSG000000030365 | 0.680864066  | -0.562821299 | 0.459253674 | 0.497972976 | 0.999071534 | Clec2i   | Clec2i   | CLEC2A      | 1.052700503 | 0.474320355 | 0.06732022  | 0           | 0.654025616 | 1.018670261 | 0.258861174 | 0.138164905 | 1.335667137 | 0.457512752 |
| ENSMUSG000000062901 | -0.234395947 | 4.941945371  | 0.459121467 | 0.498034843 | 0.999071534 | Klh124   | Klh124   | KLHL24      | 26.45787265 | 64.56685836 | 22.61959403 | 26.08767206 | 32.63587824 | 19.20921064 | 19.60873392 | 47.11423253 | 27.5759794  | 18.30051006 |
| ENSMUSG000000037364 | 0.154894429  | 6.745369501  | 0.459038273 | 0.498073781 | 0.999071534 | Srrt     | Srrt     | SRRT        | 107.4456314 | 77.90711835 | 125.2829301 | 104.6975988 | 110.6611342 | 149.3079554 | 87.23621561 | 102.5874418 | 84.85414751 | 128.1035704 |
| ENSMUSG000000030034 | -0.210575011 | 3.569408236  | 0.459001992 | 0.498090763 | 0.999071534 | Ino80b   | Ino80b   | INO80B-WBP1 | 14.17636678 | 8.122736084 | 17.57057751 | 12.28063286 | 13.21131744 | 15.71662689 | 8.9307105   | 9.257048621 | 7.6997282   | 11.9606905  |
| ENSMUSG000000036980 | -0.189437142 | 4.787118949  | 0.458907648 | 0.498134928 | 0.999071534 | Taf6     | Taf6     | TAf6        | 31.79155519 | 26.91768016 | 25.64900395 | 25.67137942 | 42.5770676  | 35.07136185 | 36.95243258 | 14.09282029 | 22.23492939 | 17.1240487  |
| ENSMUSG000000033033 | -0.263887301 | 2.945790327  | 0.458889592 | 0.498143382 | 0.999071534 | Calhm2   | Calhm2   | CALHM2      | 10.59718506 | 6.759065062 | 7.741825339 | 9.435966491 | 8.306125323 | 10.25946477 | 11.58403753 | 3.799534882 | 4.16413872  | 4.379050622 |
| ENSMUSG000000039031 | -0.166841398 | 5.170985807  | 0.458794026 | 0.498188127 | 0.999071534 | Arhgap18 | Arhgap18 | ARHGAP18    | 40.07279915 | 38.65710895 | 33.32350907 | 41.83741025 | 43.10028809 | 46.13121041 | 46.07728896 | 18.09960253 | 23.9634398  | 32.28732847 |
| ENSMUSG000000091811 | -0.222120676 | 3.321012885  | 0.458761265 | 0.498203467 | 0.999071534 | Prr24    | Inafm1   | INAFM1      | 16.35194782 | 9.782857327 | 7.80914556  | 11.23990126 | 10.00659192 | 10.4049891  | 7.830550511 | 10.0169556  | 5.421237202 | 10.78422914 |
| ENSMUSG000000040424 | -0.459711837 | 0.371315499  | 0.458707469 | 0.49822866  | 0.999071534 | Hipk4    | Hipk4    | HIPK4       | 0.912340436 | 0.889350666 | 2.490848153 | 1.942698983 | 0.654025616 | 1.018670261 | 0.388291761 | 1.4507315   | 0.392843275 | 1.503256184 |
| ENSMUSG000000074811 | -0.237626685 | 3.41663819   | 0.458579142 | 0.498288763 | 0.999071534 | Hps6     | Hps6     | HP56        | 16.70284798 | 13.57742017 | 10.16535327 | 5.342422204 | 14.06155074 | 16.0804377  | 8.283557565 | 7.253657501 | 8.32827744  | 7.777716776 |
| ENSMUSG000000078903 | -0.40003383  | 1.27201476   | 0.458560033 | 0.498297714 | 0.999071534 | Gm14391  | Gm14391  | ZNF788      | 1.614140771 | 4.506043375 | 3.164050356 | 1.387642131 | 2.812310149 | 2.328389169 | 3.494625848 | 0.759906976 | 0.392843275 | 2.810435474 |

|                     |              |              |             |             |             |               |          |          |             |             |             |             |             |             |             |              |             |             |
|---------------------|--------------|--------------|-------------|-------------|-------------|---------------|----------|----------|-------------|-------------|-------------|-------------|-------------|-------------|-------------|--------------|-------------|-------------|
| ENSMUSG00000022253  | 0.144483488  | 6.080237447  | 0.458100483 | 0.498513056 | 0.999071534 | Nadk2         | Nadk2    | NADK2    | 64.35509076 | 71.20734333 | 62.47316448 | 66.60682229 | 68.21487174 | 64.68556159 | 65.42716171 | 84.21150947  | 60.8907077  | 63.59427246 |
| ENSMUSG00000034987  | -0.721904255 | -0.643194332 | 0.458087235 | 0.498519266 | 0.999071534 | Hrh2          | Hrh2     | HRH2     | 1.824680872 | 0.296450222 | 0.269280881 | 0.485674746 | 0.39241537  | 1.091432423 | 0.776583522 | 0            | 0           | 0.130717929 |
| ENSMUSG00000022529  | 0.155474562  | 4.575424135  | 0.458032431 | 0.498544958 | 0.999071534 | Zfp263        | Zfp263   | ZNF263   | 24.21211157 | 27.80703083 | 23.29279624 | 20.1208109  | 21.19042996 | 30.12353487 | 23.23279036 | 23.14262155  | 18.5422026  | 26.66645752 |
| ENSMUSG00000018209  | -0.14792189  | 5.019912074  | 0.457823716 | 0.498642823 | 0.999071534 | Stk4          | Stk4     | STK4     | 36.91469764 | 40.37652024 | 31.03462158 | 29.97307003 | 38.52210878 | 44.67596717 | 26.46855503 | 32.19242282  | 22.54920401 | 24.77104755 |
| ENSMUSG00000062210  | -0.158103721 | 5.939851682  | 0.457732004 | 0.498685836 | 0.999071534 | Tnfaip8       | Tnfaip8  | TNFAIP8  | 83.51423991 | 58.93430414 | 53.58689539 | 77.2916667  | 61.41300534 | 69.7789129  | 80.44110979 | 49.87753063  | 36.22015    | 47.71204409 |
| ENSMUSG00000036334  | -0.162772635 | 6.914203715  | 0.457723018 | 0.498690051 | 0.999071534 | Igsf10        | Igsf10   | IGSF10   | 87.30396173 | 136.189232  | 147.0273612 | 156.3872682 | 130.4781104 | 144.8694636 | 97.07294022 | 124.3484143  | 84.30416692 | 103.9207536 |
| ENSMUSG00000039646  | -0.154395107 | 6.787968145  | 0.457492959 | 0.498797979 | 0.999071534 | Vasn          | Vasn     | VASN     | 111.1651731 | 143.0075871 | 120.1665933 | 125.7897592 | 102.2242038 | 107.2514261 | 88.85409795 | 123.3121775  | 89.80397278 | 92.09078099 |
| ENSMUSG00000032316  | 0.152935318  | 5.373024255  | 0.457472284 | 0.49880768  | 0.999071534 | Clk3          | Clk3     | CLK3     | 43.58180083 | 48.67712646 | 37.56468295 | 32.05453323 | 41.92304198 | 42.9296753  | 36.30527964 | 57.40751794  | 28.91326508 | 44.77089069 |
| ENSMUSG00000020897  | 0.194446617  | 5.132198652  | 0.457237109 | 0.498918053 | 0.999071534 | Aurkb         | Aurkb    | AURKB    | 37.47613791 | 17.01624274 | 44.22938476 | 31.01380163 | 39.56854977 | 64.24898862 | 39.02332197 | 20.79381817  | 30.87748145 | 29.99976471 |
| ENSMUSG000000002342 | -0.140339302 | 5.180557587  | 0.45695355  | 0.499051188 | 0.999071534 | Tmem161a      | Tmem161a | TMEM161A | 38.73937852 | 38.12349855 | 42.41173882 | 35.93993119 | 41.66143174 | 38.70946993 | 40.25291254 | 30.39627905  | 23.41345922 | 34.77096912 |
| ENSMUSG00000049580  | -0.219545368 | 3.901714835  | 0.456502898 | 0.4992629   | 0.999071534 | Tsku          | Tsku     | TSKU     | 20.07148959 | 18.97281421 | 13.86796539 | 13.11321814 | 17.07006858 | 21.39207549 | 20.45003274 | 12.36575898  | 5.185531236 | 9.411690889 |
| ENSMUSG00000036893  | 0.156724296  | 5.114861177  | 0.456400622 | 0.499310969 | 0.999071534 | Ehmt1         | Ehmt1    | EHMT1    | 28.14219345 | 29.52644211 | 38.7091267  | 37.53571964 | 34.99037045 | 42.56586449 | 25.62725622 | 31.50159829  | 35.82730672 | 39.34609663 |
| ENSMUSG00000031112  | 0.459517059  | 0.965392933  | 0.456383558 | 0.49931899  | 0.999071534 | 2610018G03Rlk | Stk26    | STK26    | 1.614140771 | 1.719411288 | 1.077123525 | 1.734552664 | 1.765869163 | 2.692199976 | 3.753487022 | 2.832380548  | 0           | 1.30717929  |
| ENSMUSG00000071655  | -0.162220325 | 7.272876718  | 0.456357733 | 0.499331129 | 0.999071534 | Ubxn1         | Ubxn1    | UBXN1    | 155.3084142 | 176.7436224 | 186.5443306 | 164.9906494 | 162.9177809 | 130.8263664 | 149.1040362 | 167.5249471  | 102.3749576 | 152.6131821 |
| ENSMUSG000000041126 | -0.172621797 | 6.445153051  | 0.456191326 | 0.499409362 | 0.999071534 | H2afv         | H2afv    | H2AFV    | 113.2003941 | 55.85122183 | 94.9888309  | 126.4141981 | 85.35034288 | 74.65397772 | 96.61993316 | 67.21722618  | 70.94749555 | 82.41765424 |
| ENSMUSG00000021636  | 0.505584064  | -0.039349575 | 0.456174976 | 0.49941705  | 0.999071534 | Marveld2      | Marveld2 | MARVELD2 | 0.350900168 | 0.711480533 | 1.346404407 | 0.555056852 | 0.654025616 | 0.800383777 | 0.647152935 | 1.865226215  | 1.099961171 | 0.261435858 |
| ENSMUSG00000039607  | -0.324319338 | 3.365462726  | 0.456139465 | 0.499433748 | 0.999071534 | Rbms3         | Rbms3    | RBMS3    | 3.930081878 | 8.004155995 | 19.99410544 | 19.21884351 | 6.605658721 | 12.80614043 | 4.918362304 | 5.733843549  | 13.51380868 | 5.816947841 |
| ENSMUSG000000024135 | -0.171566165 | 4.247704036  | 0.456121423 | 0.499442232 | 0.999071534 | Srbd1         | Srbd1    | SRBD1    | 21.05401006 | 22.17447661 | 18.10913927 | 19.28822562 | 23.28331193 | 29.10486461 | 15.8552469  | 13.60924312  | 13.04239675 | 16.33974113 |
| ENSMUSG00000040356  | -0.148681207 | 5.766558284  | 0.456106671 | 0.499449169 | 0.999071534 | Skiv2l        | Skiv2l   | SKIV2L   | 70.32039361 | 56.7405725  | 70.68623136 | 42.46184921 | 57.35804652 | 65.41318321 | 35.46398083 | 48.357771668 | 42.26993644 | 58.88842702 |
| ENSMUSG000000027220 | -0.151561624 | 6.375864941  | 0.455261681 | 0.499846799 | 0.999071534 | Syt13         | Syt13    | SYT13    | 94.25178505 | 79.68581968 | 66.5123777  | 96.85742074 | 115.8279366 | 89.57022083 | 64.84472407 | 66.11190694  | 66.70478818 | 92.54829374 |
| ENSMUSG000000026150 | 0.196360198  | 5.73141393   | 0.455239478 | 0.499857255 | 0.999071534 | Mff           | Mff      | MFF      | 70.32039361 | 57.86708334 | 30.56338004 | 43.4331987  | 55.46137223 | 46.93159418 | 98.88496844 | 54.43697249  | 27.97044121 | 47.3198903  |
| ENSMUSG000000097164 | -0.240150087 | 2.712253682  | 0.455121946 | 0.499912607 | 0.999071534 | Ccdc41os1     | Cep83os  |          | 9.474304528 | 6.284744707 | 8.011106221 | 6.105625376 | 6.278645913 | 6.548594537 | 4.400639957 | 5.664761096  | 5.421237202 | 6.274460592 |
| ENSMUSG000000048911 | -0.269656512 | 4.427757645  | 0.455110728 | 0.49991789  | 0.999071534 | Rnf24         | Rnf24    | RNF24    | 25.82625234 | 44.52682335 | 12.52156098 | 11.10113705 | 28.71172454 | 36.74489157 | 18.76743511 | 25.28417758  | 5.578374512 | 12.48356222 |
| ENSMUSG000000029569 | 0.150357287  | 5.630198854  | 0.455049407 | 0.499946774 | 0.999071534 | Tmem168       | Tmem168  | TMEM168  | 47.23116257 | 47.55061561 | 47.3261149  | 47.31859667 | 53.76090563 | 54.78990763 | 75.00502514 | 51.12101477  | 31.82030531 | 40.71863489 |
| ENSMUSG000000031371 | -0.159097009 | 5.434185814  | 0.454615104 | 0.500151424 | 0.999071534 | Haus7         | Haus7    | HAUS7    | 39.72189898 | 36.5819574  | 65.97381593 | 49.95511672 | 43.03488553 | 55.15371843 | 44.39469133 | 29.08371246  | 28.59899046 | 43.00619864 |
| ENSMUSG000000027439 | -0.167464852 | 5.27346232   | 0.45441301  | 0.500246702 | 0.999071534 | Gzf1          | Gzf1     | GZF1     | 45.1959416  | 54.0725205  | 30.42873959 | 41.76802814 | 40.41878307 | 38.05461048 | 47.17744895 | 36.06104015  | 16.9708295  | 39.99968628 |
| ENSMUSG000000041773 | -0.162797359 | 6.088362712  | 0.45429452  | 0.500302579 | 0.999071534 | Enc1          | Enc1     | ENC1     | 56.9160072  | 76.8991876  | 73.64832105 | 63.27648117 | 102.6820217 | 89.71574516 | 39.92933608 | 75.78345028  | 46.90548709 | 61.56814456 |
| ENSMUSG000000073792 | 0.237445088  | 3.502137511  | 0.453776936 | 0.500546783 | 0.999071534 | Alg6          | Alg6     | ALG6     | 12.562226   | 10.19788764 | 8.616988204 | 11.6561939  | 10.26820217 | 14.33414582 | 18.37914335 | 6.770080335  | 12.41384751 | 6.470537486 |
| ENSMUSG000000020319 | 0.282651584  | 2.567523354  | 0.453600486 | 0.500630081 | 0.999071534 | Wdpcp         | Wdpcp    | WDPCP    | 6.877643287 | 6.521904885 | 5.654898509 | 2.497755836 | 5.820827982 | 9.531843159 | 9.124856381 | 3.592287524  | 2.749902928 | 6.862691273 |
| ENSMUSG000000024862 | -0.189167445 | 4.282913975  | 0.453410204 | 0.500719936 | 0.999071534 | Klc2          | Klc2     | KLC2     | 26.45787265 | 18.97281421 | 17.03201575 | 18.80255087 | 26.09562208 | 28.81381596 | 15.8552469  | 18.37593234  | 7.621159544 | 19.93448417 |
| ENSMUSG000000038372 | -0.160565236 | 5.075619806  | 0.453277331 | 0.500782697 | 0.999071534 | Gmds          | Gmds     | GMD5     | 41.19567969 | 36.93769767 | 30.42873959 | 38.22954071 | 37.27946011 | 47.44092931 | 42.45323252 | 23.28078646  | 19.32788915 | 25.03248341 |
| ENSMUSG000000028496 | -0.186476448 | 4.522929287  | 0.453265625 | 0.500788227 | 0.999071534 | Mlr3          | Mlr3     | MLLT3    | 17.82572852 | 28.99283172 | 23.62939734 | 25.04694046 | 30.73920395 | 17.53568093 | 14.10793398 | 26.38949681  | 19.40645781 | 24.05209894 |
| ENSMUSG000000079362 | -0.231564502 | 4.651385294  | 0.453054855 | 0.500887811 | 0.999071534 | Gbp6          | Gm43302  | GBP6     | 33.33551593 | 23.71601776 | 25.51436351 | 31.63824059 | 25.63780415 | 18.918162   | 6.989251696 | 32.74508243  | 17.59937874 | 33.46378983 |
| ENSMUSG000000091803 | 0.188147889  | 5.699916092  | 0.452745692 | 0.501033945 | 0.999071534 | Cox16         | Cox16    | COX16    | 56.77564714 | 29.05212176 | 45.84507005 | 75.41834982 | 42.31545735 | 38.12737264 | 63.22684173 | 48.91037629  | 49.81252733 | 61.56814456 |
| ENSMUSG000000020253 | -0.196392399 | 4.292466491  | 0.452479753 | 0.501159706 | 0.999071534 | Ppm1m         | Ppm1m    | PPM1M    | 29.75633422 | 25.13897883 | 17.23397641 | 16.85985189 | 19.42456079 | 29.6869619  | 20.06174098 | 18.16868498  | 7.149747614 | 16.2090232  |
| ENSMUSG000000066150 | -0.188033692 | 5.413697327  | 0.452463427 | 0.501167428 | 0.999071534 | Slc31a1       | Slc31a1  | SLC31A1  | 53.82808573 | 54.66542094 | 38.91108736 | 40.44976812 | 47.80927253 | 61.19297784 | 63.87399466 | 29.63637208  | 17.20653547 | 27.58148302 |
| ENSMUSG000000054008 | -0.355252651 | 4.790788694  | 0.452254092 | 0.501266461 | 0.999071534 | Ndst1         | Ndst1    | NDST1    | 44.07306106 | 73.04533471 | 14.27188671 | 8.325852786 | 22.95629912 | 64.24898862 | 33.65195261 | 13.95465538  | 5.814080477 | 9.999921569 |
| ENSMUSG000000030037 | 0.192185636  | 5.606747836  | 0.452211873 | 0.501286438 | 0.999071534 | MrpI53        | MrpI53   | MRPL53   | 74.81191576 | 42.03664148 | 33.18886863 | 48.56747458 | 37.08325242 | 38.63670777 | 86.07134033 | 43.31469765  | 38.02722907 | 42.54868589 |
| ENSMUSG000000022865 | -0.404455473 | 0.426360416  | 0.4520648   | 0.501356041 | 0.999071534 | Cxadr         | Cxadr    |          | 1.403600671 | 1.778701332 | 2.01960661  | 0.971349492 | 0.981038424 | 1.673529715 | 0.776583522 | 0.483577167  | 1.099961171 | 1.045743432 |

|                     |              |              |             |             |             |             |           |           |             |             |             |             |             |             |             |             |             |             |
|---------------------|--------------|--------------|-------------|-------------|-------------|-------------|-----------|-----------|-------------|-------------|-------------|-------------|-------------|-------------|-------------|-------------|-------------|-------------|
| ENSMUSG00000031993  | 0.187716633  | 4.001124761  | 0.4519219   | 0.501423685 | 0.999071534 | Snx19       | Snx19     | SNX19     | 15.93086761 | 19.68429474 | 11.17515658 | 14.22333184 | 16.21983528 | 24.81189708 | 20.25588686 | 12.57300634 | 11.39245499 | 14.57504908 |
| ENSMUSG00000024201  | -0.199779272 | 4.68884971   | 0.451771394 | 0.501494946 | 0.999071534 | Kdm4b       | Kdm4b     | KDM4B     | 24.91391191 | 37.41201802 | 27.803251   | 23.03485937 | 29.56195784 | 19.57302145 | 12.29590576 | 38.06443127 | 18.62077126 | 25.2285603  |
| ENSMUSG00000000441  | -0.146091996 | 6.244410566  | 0.451598599 | 0.501576781 | 0.999071534 | Raf1        | Raf1      | RAF1      | 101.8312287 | 98.59934385 | 72.97511885 | 71.11665921 | 69.19591017 | 101.2121667 | 74.4225875  | 65.69741223 | 45.72695727 | 67.64652826 |
| ENSMUSG000000071497 | 0.185376794  | 7.169011831  | 0.451570355 | 0.50159016  | 0.999071534 | Nutf2-ps1   | Nutf2-ps1 | NUTF2     | 140.0793469 | 79.56723959 | 170.185517  | 170.1249253 | 134.9254846 | 158.4032256 | 177.061043  | 104.2454207 | 150.2232682 | 142.8093374 |
| ENSMUSG000000091655 | 0.758745801  | 2.657186218  | 0.451422409 | 0.501660248 | 0.999071534 | Gm8741      | Gm8741    |           | 12.42186594 | 10.90936817 | 0.538561763 | 0           | 0.327012808 | 15.64386473 | 20.32060215 | 3.730452429 | 0           | 0.849666539 |
| ENSMUSG00000024666  | 0.189768377  | 4.224420719  | 0.451282061 | 0.501726752 | 0.999071534 | Tmem138     | Tmem138   | TMEM138   | 16.28176778 | 12.33232924 | 20.59998742 | 19.70451826 | 20.92881971 | 19.35473496 | 25.23896446 | 13.47107822 | 13.1209654  | 24.90176548 |
| ENSMUSG000000059674 | -0.368946311 | 1.917072546  | 0.451212711 | 0.501759619 | 0.999071534 | Cdh24       | Cdh24     | CDH24     | 8.351423991 | 3.735272798 | 2.692808814 | 3.122194795 | 3.531738326 | 8.14936209  | 3.947632902 | 2.417885834 | 0.785686551 | 1.30717929  |
| ENSMUSG00000007594  | 0.674915995  | 0.251359359  | 0.451204294 | 0.501763608 | 0.999071534 | Hapln4      | Hapln4    | HAPLN4    | 0.98252047  | 0           | 0.269280881 | 1.457024238 | 1.504258917 | 0.654859454 | 0           | 1.796143762 | 0.707117896 | 3.071871332 |
| ENSMUSG000000041347 | -0.256534672 | 2.427625619  | 0.451176185 | 0.501776931 | 0.999071534 | Bdkrb1      | Bdkrb1    | BDKRB1    | 8.491784059 | 7.174095373 | 5.318297407 | 4.509836926 | 4.251166504 | 5.093351307 | 4.918362304 | 4.144947144 | 4.16413872  | 4.705845444 |
| ENSMUSG000000019528 | 0.173851332  | 4.671944395  | 0.451049997 | 0.501836749 | 0.999071534 | Gyg         | Gyg       | GYG1      | 23.15941107 | 29.6450222  | 24.5045602  | 16.02726661 | 31.06621676 | 24.81189708 | 28.86302089 | 20.79381817 | 29.38467701 | 23.59458619 |
| ENSMUSG000000040658 | 0.266696626  | 4.771431208  | 0.450821396 | 0.501945144 | 0.999071534 | Dnph1       | Dnph1     | DNPH1     | 35.51109697 | 9.96072746  | 27.53397102 | 31.49947637 | 23.08710424 | 40.52852397 | 53.19597124 | 7.875399573 | 23.1775325  | 21.30702243 |
| ENSMUSG00000029229  | 0.14930687   | 6.207413287  | 0.450323049 | 0.502181583 | 0.999071534 | Chic2       | Chic2     | CHIC2     | 72.56615468 | 74.05326546 | 71.56139422 | 74.51638243 | 69.98074091 | 63.59412917 | 76.4287616  | 88.70186887 | 73.54026117 | 65.48968243 |
| ENSMUSG00000022225  | -0.445175435 | 2.463986352  | 0.450249651 | 0.502216423 | 0.999071534 | Cma1        | Cma1      | CMA1      | 17.40464832 | 4.150303108 | 3.164050356 | 4.648601139 | 3.073920395 | 16.0804377  | 4.724216424 | 0.967154334 | 0.785686551 | 2.287563758 |
| ENSMUSG000000082674 | 1.165462091  | -1.085069866 | 0.450206184 | 0.502237057 | 0.999071534 | Gm11914     | Gm11914   |           | 0           | 0           | 0           | 1.110113705 | 0           | 0           | 0           | 0.27632981  | 1.649941757 | 0.196076894 |
| ENSMUSG000000051379 | -0.292024819 | 2.627078415  | 0.450200155 | 0.502239919 | 0.999071534 | Flrt3       | Flrt3     | FLRT3     | 3.649361744 | 13.16238986 | 5.116336746 | 5.758714844 | 6.867268968 | 6.912405345 | 3.882917609 | 7.875399573 | 4.556981996 | 3.071871332 |
| ENSMUSG00000030259  | -0.182749906 | 4.253352605  | 0.450169429 | 0.502254506 | 0.999071534 | Rassf8      | Rassf8    | RASSF8    | 19.36968926 | 28.81496158 | 15.28169002 | 17.90058349 | 23.47951961 | 27.14028625 | 18.63800452 | 17.96143762 | 10.52819978 | 13.79074151 |
| ENSMUSG000000067586 | -0.490482333 | 0.721178834  | 0.450152444 | 0.50226257  | 0.999071534 | S1pr3       | S1pr3     | S1PR3     | 1.403600671 | 3.438822576 | 2.490848153 | 0.416292639 | 1.438856355 | 1.673529715 | 2.135604685 | 1.312566595 | 0           | 1.176461361 |
| ENSMUSG000000026470 | -0.143387373 | 5.493103708  | 0.450097372 | 0.502288718 | 0.999071534 | Stx6        | Stx6      | STX6      | 49.96818388 | 49.68505721 | 53.38493473 | 36.91128068 | 55.72298248 | 62.57545891 | 40.96478077 | 41.17314163 | 25.61338156 | 41.04542971 |
| ENSMUSG000000032560 | -0.160270932 | 5.884818513  | 0.45003813  | 0.502316848 | 0.999071534 | Dnajc13     | Dnajc13   | DNAJC13   | 64.98671106 | 86.3855947  | 52.71173253 | 53.84051468 | 66.12198977 | 91.17098839 | 53.32540183 | 62.86503168 | 30.17036356 | 40.58791966 |
| ENSMUSG000000005674 | 0.187639065  | 4.501828016  | 0.450028315 | 0.502321508 | 0.999071534 | Tomm40l     | Tomm40l   | TOMM40L   | 32.2126354  | 17.84630337 | 21.47515029 | 19.01069719 | 19.09754799 | 31.5787781  | 35.78755729 | 15.40538688 | 14.61376985 | 21.04558657 |
| ENSMUSG000000031090 | 0.233170625  | 3.376807739  | 0.449884805 | 0.502389664 | 0.999071534 | Nadsyn1     | Nadsyn1   | NADSYN1   | 12.7727661  | 8.952796705 | 9.559471289 | 7.701413827 | 10.13739705 | 7.64002696  | 7.053966989 | 12.43484143 | 12.96382809 | 11.63389568 |
| ENSMUSG000000074182 | 0.143504245  | 4.941879955  | 0.449634008 | 0.502508809 | 0.999071534 | Znhit6      | Znhit6    | ZNHIT6    | 29.26507399 | 27.45129056 | 33.32350907 | 28.16913526 | 32.83208592 | 37.54527535 | 32.16350086 | 24.5242706  | 26.47763677 | 35.09776394 |
| ENSMUSG000000025630 | 0.208150911  | 7.57517498   | 0.449554734 | 0.50254648  | 0.999071534 | Hprt        | Hprt      | HPRT1     | 262.1224253 | 159.1344792 | 163.2515343 | 172.6920632 | 162.2637553 | 211.2285549 | 374.1838269 | 125.7991458 | 119.1886498 | 170.2601025 |
| ENSMUSG000000053113 | -0.177219373 | 6.243261933  | 0.449423078 | 0.502609053 | 0.999071534 | Socs3       | Socs3     | SOC3      | 100.0065478 | 107.5521406 | 69.27250673 | 58.48911582 | 83.64987628 | 70.28824803 | 47.75988659 | 111.2227484 | 47.7697423  | 65.3589645  |
| ENSMUSG000000047965 | -0.406782293 | 2.019381107  | 0.449390556 | 0.502624512 | 0.999071534 | Rp19-ps7    | Rp19-ps7  |           | 6.667103186 | 12.33232924 | 1.211763966 | 1.248877918 | 1.962076848 | 4.365729691 | 4.594785837 | 3.868617334 | 1.571373102 | 2.222204793 |
| ENSMUSG000000026792 | -0.25065967  | 2.925962146  | 0.448935976 | 0.502840676 | 0.999071534 | Lrsam1      | Lrsam1    | LRSAM1    | 10.52700503 | 9.664277238 | 4.847055865 | 8.325852786 | 8.829345815 | 9.750129644 | 7.571689337 | 8.289894287 | 3.142746204 | 5.097999231 |
| ENSMUSG000000029313 | -0.14609906  | 5.498515108  | 0.448901568 | 0.502857044 | 0.999071534 | Aff1        | Aff1      | AFF1      | 47.16098254 | 60.29797516 | 45.64310939 | 38.43768703 | 55.19976199 | 63.73965349 | 33.7166679  | 44.6963467  | 30.32750087 | 38.36571216 |
| ENSMUSG000000098387 | 0.836968674  | -0.37441209  | 0.448699423 | 0.502953226 | 0.999071534 | Pet117      | Pet117    | PET117    | 0           | 2.193731643 | 0           | 0           | 0.196207685 | 0.436572969 | 1.035444696 | 1.519813953 | 0.785686551 | 0.065358965 |
| ENSMUSG000000067599 | -0.582096828 | 0.469515887  | 0.448508499 | 0.503044096 | 0.999071534 | Klra7       | Klra7     |           | 4.140621979 | 2.253021687 | 0.538561763 | 0.138764213 | 0.784830739 | 1.673529715 | 1.553167044 | 0.414494714 | 0           | 1.437897219 |
| ENSMUSG000000085666 | 0.652583107  | 2.215718482  | 0.448505338 | 0.503045601 | 0.999071534 | Gm9855      | Gm9855    |           | 3.438821644 | 10.85007813 | 0.807842644 | 0           | 3.335530641 | 10.91432423 | 13.13720458 | 1.865226215 | 0           | 2.810435474 |
| ENSMUSG000000089988 | 0.374618642  | 0.996775815  | 0.448489024 | 0.503053367 | 0.999071534 | Gm16238     | Gm16238   |           | 2.105401006 | 1.185800888 | 1.279084186 | 2.01208109  | 1.831271725 | 0.727621615 | 2.718042326 | 2.556050739 | 1.178529826 | 2.810435474 |
| ENSMUSG000000025077 | 0.211917961  | 3.496431712  | 0.448435743 | 0.503078733 | 0.999071534 | Dclre1a     | Dclre1a   | DCLRE1A   | 9.825204696 | 9.782857327 | 10.97319592 | 7.701413827 | 15.63121222 | 11.71470801 | 11.00159989 | 10.29328541 | 12.96382809 | 10.91494707 |
| ENSMUSG000000020453 | -0.181812546 | 3.859634938  | 0.448167533 | 0.503206451 | 0.999071534 | Patz1       | Patz1     | PATZ1     | 15.79050755 | 14.05174052 | 18.04181905 | 16.02726661 | 15.36960198 | 20.2278809  | 11.907614   | 10.63869767 | 9.663944577 | 14.05217737 |
| ENSMUSG000000046658 | -0.254368574 | 2.859169238  | 0.448160882 | 0.503209619 | 0.999071534 | Zfp316      | Zfp316    | ZNF316    | 5.895122818 | 8.241316173 | 8.549667983 | 7.770795933 | 9.744981678 | 7.348978314 | 3.041618794 | 7.875399573 | 4.714119306 | 8.496665386 |
| ENSMUSG000000035861 | 0.436712913  | 1.095530981  | 0.448054742 | 0.503260177 | 0.999071534 | Tmprss11bnl | Tmprss11b | TMPRSS11B | 0.912340436 | 4.387463286 | 1.279084186 | 0.346910533 | 1.962076848 | 1.673529715 | 2.523896446 | 3.523205072 | 0.549980586 | 2.941153403 |
| ENSMUSG000000026189 | -0.242764454 | 2.962074302  | 0.448004517 | 0.503284104 | 0.999071534 | Pecr        | Pecr      | PECR      | 8.140883891 | 6.46261484  | 8.415027543 | 8.603381212 | 11.51085084 | 7.858313444 | 8.671849326 | 6.286503168 | 2.985608894 | 8.758101244 |
| ENSMUSG000000006301 | -0.151563412 | 6.586570526  | 0.44784389  | 0.503360639 | 0.999071534 | Tmbim1      | Tmbim1    | TMBIM1    | 102.0417688 | 140.6952754 | 75.465967   | 91.16808801 | 116.5473648 | 99.82968561 | 96.94350963 | 97.06084561 | 67.33333742 | 79.67257773 |
| ENSMUSG000000025494 | -0.25074641  | 2.850232942  | 0.447771368 | 0.503395201 | 0.999071534 | Sigirr      | Sigirr    | SIGIRR    | 7.71980369  | 6.936935196 | 5.587578288 | 11.44804758 | 7.979112515 | 9.313556675 | 8.348272859 | 5.941090906 | 3.535589479 | 4.901922338 |
| ENSMUSG000000036552 | 0.181283755  | 4.445648422  | 0.44769975  | 0.503429335 | 0.999071534 | Ermard      | Ermard    | ERMARD    | 23.72085134 | 15.77115181 | 21.54247051 | 23.38176991 | 20.73261203 | 17.75396741 | 17.14955277 | 25.56050739 | 19.32788915 | 29.73832885 |

|                     |              |              |             |             |             |               |               |          |             |             |              |             |             |             |             |             |             |             |
|---------------------|--------------|--------------|-------------|-------------|-------------|---------------|---------------|----------|-------------|-------------|--------------|-------------|-------------|-------------|-------------|-------------|-------------|-------------|
| ENSMUSG00000077450  | -0.162034473 | 6.690298679  | 0.447284785 | 0.503627195 | 0.999071534 | Rab11b        | Rab11b        | RAB11B   | 100.6381681 | 106.9592401 | 135.4482833  | 112.3990126 | 109.0914727 | 122.0221449 | 54.6197077  | 96.16277373 | 89.25399219 | 108.2344452 |
| ENSMUSG000000047181 | -0.177963035 | 4.601708632  | 0.447179703 | 0.50367732  | 0.999071534 | Samd14        | Samd14        | SAMD14   | 29.54579412 | 34.50680584 | 22.21567271  | 18.94131509 | 28.58091942 | 30.63287    | 15.14337867 | 25.07693022 | 13.27810271 | 27.51612406 |
| ENSMUSG000000044716 | 0.711683352  | 0.074883985  | 0.447174592 | 0.503679758 | 0.999071534 | Dok7          | Dok7          | DOK7     | 0.842160403 | 2.193731643 | 0            | 0.138764213 | 0.523220493 | 0.291048646 | 0           | 1.243484143 | 1.728510412 | 1.960768935 |
| ENSMUSG000000031079 | 0.646910069  | 0.017389939  | 0.446923959 | 0.503799349 | 0.999071534 | Zfp300        | Zfp300        |          | 0           | 0.948640711 | 0.1009803305 | 0.832585279 | 0.784830739 | 1.45524323  | 0.388291761 | 1.4507315   | 1.807079067 | 0           |
| ENSMUSG00000018599  | -0.201751284 | 3.558517843  | 0.446669743 | 0.503920698 | 0.999071534 | Mlef2         | Mlef2         | MIEF2    | 13.82546661 | 10.49433786 | 13.46404407  | 13.04383603 | 13.86534306 | 14.04309717 | 10.74273872 | 8.08264693  | 6.285492408 | 14.24825426 |
| ENSMUSG00000023284  | 0.325219577  | 1.899239601  | 0.446667792 | 0.503921629 | 0.999071534 | Zfp605        | Zfp605        | ZNF605   | 3.789721811 | 3.616692709 | 1.88496617   | 4.648601139 | 2.550699902 | 2.910486461 | 2.135604685 | 3.315957715 | 3.378452169 | 7.320204025 |
| ENSMUSG000000086721 | -0.461255173 | 0.189681014  | 0.446571839 | 0.503967445 | 0.999071534 | Gm13750       | Gm13750       |          | 0.491260235 | 1.363671021 | 2.356207712  | 0.901967385 | 0.915635862 | 0.582097292 | 1.29430587  | 1.036236786 | 0.707117896 | 0.392153787 |
| ENSMUSG000000005124 | 0.170224819  | 6.252835165  | 0.446532941 | 0.503986021 | 0.999071534 | Wisp1         | Wisp1         | WISP1    | 49.12602348 | 64.15182805 | 118.4162676  | 77.15290248 | 61.28220022 | 84.25858304 | 68.08048874 | 77.37234668 | 66.54765087 | 92.15613995 |
| ENSMUSG000000031728 | -0.202532707 | 3.655134367  | 0.446433331 | 0.504033593 | 0.999071534 | Zfp821        | Zfp821        | ZNF821   | 12.562226   | 16.54192239 | 15.01240914  | 11.6561939  | 13.53833025 | 10.98708639 | 7.506974044 | 15.05997462 | 8.956826681 | 13.13715187 |
| ENSMUSG000000027848 | -0.158532536 | 5.923689377  | 0.446411817 | 0.504043869 | 0.999071534 | Olfm3         | Olfm3         | OLFML3   | 58.45996794 | 88.34216617 | 51.9712101   | 57.2402379  | 76.65180219 | 87.82392896 | 60.70294528 | 44.90359406 | 29.07040239 | 63.5289135  |
| ENSMUSG000000092021 | -0.457303873 | 0.321426333  | 0.446411704 | 0.504043923 | 0.999071534 | Gbp11         | Gbp11         | GBP6     | 3.158101509 | 1.245090933 | 0.605881983  | 0.832585279 | 0.915635862 | 1.746291877 | 0.323576467 | 0.967154334 | 0.707117896 | 0.915025503 |
| ENSMUSG000000062373 | 0.144119119  | 6.181192651  | 0.446058226 | 0.504212808 | 0.999071534 | Tmem65        | Tmem65        | TMEM65   | 64.98671106 | 74.40900573 | 58.70323214  | 75.2102035  | 83.7806814  | 79.74732903 | 82.25313801 | 86.56031285 | 55.86231377 | 63.46355453 |
| ENSMUSG000000027438 | 0.298092008  | 2.572831112  | 0.445886076 | 0.504295094 | 0.999071534 | Napb          | Napb          | NAPB     | 4.35116208  | 5.217523908 | 4.645095204  | 7.354503294 | 5.363010051 | 4.511254014 | 2.200319978 | 10.08603805 | 6.678335683 | 6.601255415 |
| ENSMUSG000000046415 | 0.547837985  | 0.748845903  | 0.445795078 | 0.504338598 | 0.999071534 | B430212C06Rik | B430212C06Rik |          | 0.070180034 | 0.5336104   | 3.567971678  | 1.179495811 | 1.177246109 | 0.436572969 | 0.582437641 | 1.036236786 | 2.592765618 | 3.790819941 |
| ENSMUSG000000039191 | -0.165480973 | 7.5569792    | 0.445582365 | 0.504440319 | 0.999071534 | Rbpj          | Rbpj          | RBPJ     | 204.7151578 | 267.04236   | 162.847613   | 177.132518  | 224.1345786 | 251.9026032 | 164.8298525 | 170.4264101 | 124.5313183 | 161.1752065 |
| ENSMUSG000000027803 | -0.147015263 | 6.717975972  | 0.445561943 | 0.504450087 | 0.999071534 | Wwtr1         | Wwtr1         | WWTR1    | 94.88340535 | 125.0427037 | 110.2705209  | 110.7338421 | 132.7672    | 113.5817341 | 91.76628615 | 105.3507399 | 90.51109067 | 79.01898809 |
| ENSMUSG000000044328 | -0.170035934 | 4.290476251  | 0.445550176 | 0.504455715 | 0.999071534 | Trp53i13      | Trp53i13      | TP53I13  | 23.79103137 | 17.66843323 | 21.27318963  | 20.67586775 | 23.47951961 | 16.95358363 | 14.10793398 | 20.310241   | 14.45663254 | 21.96061207 |
| ENSMUSG000000022772 | 0.251449444  | 4.428678517  | 0.445521748 | 0.504469313 | 0.999071534 | Senp5         | Senp5         | SENP5    | 25.05427197 | 33.85461536 | 13.86796539  | 10.06040545 | 19.55536592 | 45.54911311 | 34.16967496 | 18.23776743 | 9.035395336 | 11.82997258 |
| ENSMUSG000000021027 | 0.164689823  | 4.380436466  | 0.445465575 | 0.504496183 | 0.999071534 | Ralgapa1      | Ralgapa1      | RALGAPA1 | 21.68563036 | 20.45506532 | 15.34901024  | 18.24749402 | 25.89941439 | 32.81573485 | 22.06791508 | 18.92859196 | 15.32088774 | 18.88874074 |
| ENSMUSG000000024800 | 0.183242598  | 4.723134969  | 0.44503322  | 0.504703085 | 0.999071534 | Rpp30         | Rpp30         | RPP30    | 34.7391166  | 20.33648523 | 25.98560505  | 25.87952574 | 20.79801459 | 30.85115649 | 44.6535525  | 18.23776743 | 18.69933991 | 24.05209894 |
| ENSMUSG000000004591 | 0.15416313   | 6.465456175  | 0.444745152 | 0.50484102  | 0.999071534 | Pkn2          | Pkn2          | PKN2     | 76.00497633 | 105.3584089 | 75.73524788  | 77.15290248 | 100.1967244 | 97.42853428 | 111.8280271 | 103.4164312 | 73.22598655 | 62.67924696 |
| ENSMUSG000000037185 | -0.622389581 | 1.493370853  | 0.444717923 | 0.504854061 | 0.999071534 | Krt80         | Krt80         | KRT80    | 7.158363421 | 6.106874574 | 0.807842644  | 0           | 3.073920395 | 4.80230266  | 2.135604685 | 2.970545453 | 0.864255206 | 0           |
| ENSMUSG000000040112 | 0.151429789  | 5.394262762  | 0.444673586 | 0.504875297 | 0.999071534 | Mrps35        | Mrps35        | MRPS35   | 50.03836392 | 34.32893571 | 45.50846895  | 34.9685817  | 41.85763942 | 43.14796178 | 59.86164647 | 42.96928539 | 32.76312918 | 34.37881533 |
| ENSMUSG000000010021 | -0.709082679 | -0.460734315 | 0.444442609 | 0.504985955 | 0.999071534 | Kif19a        | Kif19a        | KIF19    | 1.684320805 | 1.48225111  | 0.06732022   | 0           | 0.588623054 | 0.800383777 | 0.388291761 | 0.27632981  | 0           | 0.784307574 |
| ENSMUSG000000036208 | 0.275838192  | 2.616120133  | 0.444399593 | 0.505006568 | 0.999071534 | BC027231      | Nepro         | NEPRO    | 6.386383052 | 9.664277238 | 3.029409915  | 3.81601586  | 5.428412612 | 10.11394045 | 8.671849326 | 4.62852431  | 4.714119306 | 4.379050622 |
| ENSMUSG000000039323 | 0.278568359  | 2.469520658  | 0.444305988 | 0.505051427 | 0.999071534 | Igfbp2        | Igfbp2        | IGFBP2   | 9.263764428 | 4.446753331 | 4.981696305  | 4.02416218  | 2.746907587 | 4.656778337 | 6.212668174 | 6.700997882 | 5.421237202 | 5.163358196 |
| ENSMUSG000000026712 | 0.244956382  | 6.941056086  | 0.444104566 | 0.50514798  | 0.999071534 | Mrc1          | Mrc1          | MRC1     | 122.8852387 | 101.6824262 | 104.6156224  | 122.4594181 | 131.3283437 | 272.3487706 | 233.5574942 | 61.62154754 | 44.39129013 | 74.50921954 |
| ENSMUSG000000035297 | -0.160287194 | 6.784120601  | 0.444087559 | 0.505156134 | 0.999071534 | Cops4         | Cops4         | COPS4    | 151.3081523 | 109.1529718 | 104.0097404  | 127.9406045 | 110.3341214 | 112.1264909 | 143.4738056 | 82.2772008  | 63.01206139 | 107.5154966 |
| ENSMUSG000000038949 | 0.192754677  | 4.061180971  | 0.443971916 | 0.505211584 | 0.999071534 | Cnst          | Cnst          | CNST     | 13.12366627 | 17.13482283 | 14.94508892  | 12.41939707 | 22.95629912 | 19.79130793 | 11.51932224 | 22.93537419 | 11.94243557 | 19.60768935 |
| ENSMUSG000000027562 | -0.333703566 | 2.786527533  | 0.443830493 | 0.50527941  | 0.999071534 | Car2          | Car2          | CA2      | 18.24680872 | 6.99622524  | 5.452937848  | 5.342422204 | 3.400933203 | 7.130691829 | 12.49005164 | 3.661369977 | 2.749902928 | 3.594743048 |
| ENSMUSG000000025178 | -0.14378966  | 5.338163146  | 0.443782885 | 0.505302246 | 0.999071534 | Pl4k2a        | Pl4k2a        | PI4K2A   | 55.0211463  | 41.384451   | 42.61369948  | 39.06212599 | 42.11924967 | 56.46343734 | 32.03407027 | 40.27506975 | 24.27771443 | 36.2742253  |
| ENSMUSG000000043866 | 0.148107279  | 6.519521611  | 0.443748442 | 0.505318769 | 0.999071534 | Taf10         | Taf10         | TAF10    | 97.76078672 | 78.32214866 | 94.92151068  | 96.57989232 | 82.66883786 | 84.18582088 | 112.7987565 | 88.97819868 | 85.40412809 | 88.49603794 |
| ENSMUSG000000033712 | 0.143639906  | 4.930383259  | 0.443470611 | 0.505452079 | 0.999071534 | Ccar2         | Ccar2         | CCAR2    | 34.03731627 | 30.59366291 | 28.20717232  | 23.17362359 | 34.4017474  | 42.05652936 | 27.89229149 | 32.81416489 | 23.0991846  | 30.06512367 |
| ENSMUSG000000046229 | -0.204819619 | 6.427731306  | 0.443441317 | 0.505466138 | 0.999071534 | Scand1        | Scand1        | SCAND1   | 97.83096676 | 57.09631276 | 134.7077609  | 124.3327349 | 59.84334386 | 61.55678865 | 50.93093597 | 87.11297247 | 70.31894631 | 109.1494707 |
| ENSMUSG000000020859 | 0.170834795  | 7.187051938  | 0.443313797 | 0.505527348 | 0.999071534 | Spag9         | Spag9         | SPAG9    | 113.1302141 | 192.277614  | 128.7835815  | 113.6478905 | 165.5338834 | 136.938388  | 141.338201  | 183.4139111 | 136.4737539 | 136.7963127 |
| ENSMUSG000000030319 | 0.241298088  | 3.355864283  | 0.44328091  | 0.505543136 | 0.999071534 | Cand2         | Cand2         | CAND2    | 8.91286426  | 8.004155995 | 13.39672385  | 5.550568524 | 12.49188926 | 15.57110257 | 5.436084652 | 9.464295978 | 12.41384751 | 9.86920364  |
| ENSMUSG000000021036 | -0.146036826 | 6.48671767   | 0.443084429 | 0.505637478 | 0.999071534 | Sptlc2        | Sptlc2        | SPTLC2   | 102.603209  | 114.9633961 | 84.75615741  | 96.64927442 | 89.4053017  | 106.742091  | 104.5799143 | 81.72454118 | 51.69817505 | 73.13668128 |
| ENSMUSG000000020778 | -0.173656738 | 5.001721339  | 0.442827578 | 0.505760852 | 0.999071534 | Ten1          | Ten1          | TEN1     | 46.73990234 | 24.66465847 | 34.7372337   | 31.98515112 | 37.86808316 | 29.46867542 | 47.43631012 | 23.97161098 | 17.83508471 | 27.45076509 |
| ENSMUSG000000041846 | 0.152084062  | 5.849119179  | 0.442631712 | 0.505854968 | 0.999071534 | Smek1         | Smek1         | PPP4R3A  | 42.45892029 | 49.21073686 | 69.13786629  | 57.03209158 | 64.48692573 | 74.29016691 | 43.81225369 | 57.96017756 | 62.4620808  | 52.09109471 |

|                     |              |              |             |             |             |               |               |          |             |             |             |             |             |             |             |             |             |             |
|---------------------|--------------|--------------|-------------|-------------|-------------|---------------|---------------|----------|-------------|-------------|-------------|-------------|-------------|-------------|-------------|-------------|-------------|-------------|
| ENSMUSG00000037813  | 0.437211369  | 0.650164232  | 0.442507422 | 0.505914706 | 0.999071534 | D630003M21Rlk | D630003M21Rlk | KIAA1755 | 0.771980369 | 0.948640711 | 2.221567271 | 1.179495811 | 1.24264867  | 1.309718907 | 0.453007054 | 0.828989429 | 2.907040239 | 2.156845829 |
| ENSMUSG00000032688  | 0.223744881  | 3.466441188  | 0.442498572 | 0.50591896  | 0.999071534 | Malt1         | Malt1         | MALT1    | 10.8779052  | 9.842147372 | 13.86796539 | 5.689332737 | 12.36108414 | 12.6606161  | 7.506974044 | 10.91502748 | 9.899650542 | 15.75151045 |
| ENSMUSG00000020549  | -0.212911343 | 4.235202848  | 0.442295391 | 0.506016643 | 0.999071534 | Elac2         | Elac2         | ELAC2    | 27.86147332 | 22.11518656 | 16.15685288 | 17.34552664 | 21.19042996 | 34.34374024 | 20.96775509 | 10.43145031 | 6.992610304 | 15.75151045 |
| ENSMUSG00000079197  | -0.188632748 | 8.80370486   | 0.442246207 | 0.506040294 | 0.999071534 | Psme2         | Psme2         | PSME2    | 714.0116613 | 326.5695646 | 473.7997108 | 539.0295858 | 413.540397  | 414.0894612 | 502.8378303 | 319.3681774 | 333.5239409 | 444.8984714 |
| ENSMUSG00000031765  | -0.311592342 | 7.286405954  | 0.442066353 | 0.506126797 | 0.999071534 | Mt1           | Mt1           | MT2A     | 102.1119488 | 233.3063247 | 186.8809317 | 236.0379265 | 131.1975386 | 45.11254014 | 38.50559962 | 292.426021  | 90.1182474  | 185.6848182 |
| ENSMUSG00000097275  | 0.486222024  | 0.246132635  | 0.442001039 | 0.506158217 | 0.999071534 | Gm26648       | Gm26648       |          | 1.052700503 | 0.415030311 | 1.009803305 | 1.387642131 | 0.719428178 | 0.9459081   | 0.258861174 | 1.174401691 | 2.435628308 | 0.849666539 |
| ENSMUSG00000037826  | -0.247763039 | 2.679910043  | 0.441611022 | 0.506345907 | 0.999071534 | Ppm1k         | Ppm1k         | PPM1K    | 5.193322482 | 7.233385418 | 8.751628644 | 5.064893778 | 9.221761185 | 6.330308052 | 5.953807    | 6.700997882 | 4.871256616 | 3.790819941 |
| ENSMUSG00000053799  | -0.26308498  | 2.69863209   | 0.44154879  | 0.506375866 | 0.999071534 | Exoc6         | Exoc6         | EXOC6    | 7.579443623 | 10.85007813 | 5.587578288 | 5.203657991 | 6.932671529 | 10.04117829 | 7.636404631 | 4.62852431  | 2.828471584 | 3.92153787  |
| ENSMUSG00000035443  | 0.165988439  | 5.175007365  | 0.441532729 | 0.506383598 | 0.999071534 | Thyn1         | Thyn1         | THYN1    | 38.24811828 | 28.39993127 | 40.99801419 | 42.32308499 | 25.24538878 | 37.98184831 | 53.77840888 | 29.91270189 | 29.62038297 | 32.61412329 |
| ENSMUSG00000087543  | -0.456509098 | 0.804901829  | 0.441526383 | 0.506386654 | 0.999071534 | Gm16576       | Gm16576       |          | 2.877381375 | 1.600831199 | 0.740522424 | 1.734552664 | 2.746907587 | 1.964578361 | 2.265035272 | 1.312566595 | 0           | 1.30717929  |
| ENSMUSG00000019920  | 0.173923132  | 7.978536485  | 0.441418621 | 0.506438541 | 0.999071534 | Lims1         | Lims1         |          | 204.7151578 | 304.8694083 | 212.4626154 | 229.7241548 | 279.4651457 | 273.2219165 | 273.2926844 | 306.3115939 | 227.7705311 | 202.8088669 |
| ENSMUSG00000024774  | -0.625348179 | -0.408841812 | 0.441246877 | 0.506521254 | 0.999071534 | Ankrd22       | Ankrd22       | ANKRD22  | 1.684320805 | 0.5336104   | 0.807842644 | 0.416292639 | 0.457817931 | 0.436572969 | 1.617882337 | 0.138164905 | 0           | 0.196076894 |
| ENSMUSG00000033039  | -0.143137752 | 5.804432889  | 0.441204572 | 0.506541632 | 0.999071534 | Micall1       | Micall1       | MICALL1  | 59.16176828 | 64.44827827 | 59.37643434 | 59.39108321 | 61.34760278 | 68.8330048  | 33.00479967 | 54.36789003 | 41.40568124 | 60.5877601  |
| ENSMUSG00000032383  | 0.183375515  | 8.07544269   | 0.441006007 | 0.5066399   | 0.999071534 | Ppib          | Ppib          | PPIB     | 279.8077937 | 274.7500658 | 227.0711032 | 258.6564932 | 271.0936178 | 228.4731872 | 413.1424336 | 303.4792134 | 204.5927779 | 227.0570427 |
| ENSMUSG00000014496  | 0.169732649  | 5.216464072  | 0.44096258  | 0.506658225 | 0.999071534 | Ankrd28       | Ankrd28       | ANKRD28  | 39.09027868 | 50.69298797 | 31.775144   | 25.32446889 | 35.05577302 | 52.89809143 | 54.42556182 | 37.09727694 | 23.41345922 | 25.81679098 |
| ENSMUSG00000020941  | 0.169666338  | 4.441905306  | 0.44091609  | 0.506680629 | 0.999071534 | Map3k14       | Map3k14       | MAP3K14  | 16.84320805 | 25.61329918 | 20.12874588 | 17.20676242 | 26.03021952 | 27.21304841 | 15.98467749 | 26.66582662 | 19.95643839 | 20.58807382 |
| ENSMUSG00000021686  | -0.153146908 | 5.887335905  | 0.44075844  | 0.506756616 | 0.999071534 | Ap3b1         | Ap3b1         | AP3B1    | 54.8106062  | 84.36973319 | 61.12676007 | 50.92646621 | 72.59684337 | 65.12213456 | 35.59341141 | 66.4573192  | 49.26254675 | 53.00612021 |
| ENSMUSG00000034520  | 0.219533961  | 3.299048402  | 0.440564299 | 0.506850218 | 0.999071534 | Gjc1          | Gjc1          | GJC1     | 7.509263589 | 6.581194929 | 11.10783636 | 12.48877918 | 8.567735569 | 12.00575665 | 11.907614   | 10.56961522 | 6.285492408 | 10.32671639 |
| ENSMUSG00000020440  | -0.153834702 | 7.061257371  | 0.440290131 | 0.506982454 | 0.999071534 | Arf5          | Arf5          | ARF5     | 149.2027513 | 116.9199676 | 175.7730953 | 153.056927  | 132.8326026 | 146.834042  | 136.0962622 | 109.7720169 | 92.94671898 | 129.2146728 |
| ENSMUSG00000038079  | 0.146393672  | 5.091515862  | 0.440195401 | 0.507028158 | 0.999071534 | Tmem237       | Tmem237       | TMEM237  | 33.33551593 | 29.28928194 | 30.83266092 | 29.20986686 | 45.19317006 | 36.09003212 | 33.52252202 | 31.70884565 | 30.64177549 | 39.60753249 |
| ENSMUSG00000037958  | 0.243880111  | 5.972939726  | 0.440183354 | 0.507033972 | 0.999071534 | Ccdc55        | Nsrp1         | NSRP1    | 31.86173523 | 40.02077997 | 86.43916292 | 74.44700033 | 62.98266682 | 45.40358879 | 23.815228   | 69.28969975 | 80.37573417 | 97.25413918 |
| ENSMUSG00000026471  | -0.198423059 | 4.7859402    | 0.440088635 | 0.507079678 | 0.999071534 | Mr1           | Mr1           | MR1      | 24.98409194 | 41.14729082 | 23.36011646 | 22.82671305 | 40.74579587 | 18.48158903 | 23.10335977 | 41.72580125 | 15.87086833 | 23.2024324  |
| ENSMUSG00000017144  | 0.156026685  | 4.539863715  | 0.440072814 | 0.507087313 | 0.999071534 | Rnd3          | Rnd3          | RND3     | 26.52805268 | 23.53814763 | 21.60979073 | 19.14946141 | 23.08710424 | 36.52660508 | 23.815228   | 21.6228076  | 16.81369219 | 21.63381725 |
| ENSMUSG00000022656  | -0.180143331 | 4.214225145  | 0.439575202 | 0.507327558 | 0.999071534 | Pvrl3         | Nectin3       | NECTIN3  | 15.65014748 | 18.5577839  | 22.61959403 | 24.21435519 | 20.14398897 | 21.173789   | 22.97392919 | 15.9580465  | 9.349669957 | 15.62079252 |
| ENSMUSG00000048537  | -0.156986108 | 5.059752514  | 0.439529246 | 0.507349756 | 0.999071534 | Phldb1        | Phldb1        | PHLDB1   | 37.96739815 | 41.50303108 | 37.43004251 | 30.31998056 | 34.99037045 | 51.4428482  | 19.8675951  | 33.78131922 | 22.86347863 | 27.45076509 |
| ENSMUSG00000091896  | 0.163050144  | 7.626794039  | 0.439404161 | 0.507410182 | 0.999071534 | Ube2d2a       | Ube2d2a       | UBE2D2   | 202.8202969 | 160.1424099 | 204.3168687 | 204.469068  | 194.1802054 | 198.0586037 | 235.3695224 | 189.9767441 | 180.4722008 | 196.5344063 |
| ENSMUSG00000044627  | 0.178870573  | 7.27025943   | 0.439378621 | 0.507422521 | 0.999071534 | Swi5          | Swi5          | SWI5     | 151.8695926 | 126.9399851 | 163.3188545 | 134.6706688 | 175.4750728 | 122.3131935 | 246.1122611 | 161.3075263 | 103.0035068 | 156.2079252 |
| ENSMUSG00000051166  | 0.226685635  | 3.807041685  | 0.439213671 | 0.507502227 | 0.999071534 | Emi5          | Emi5          | EML5     | 14.52726694 | 6.640484974 | 20.1960661  | 12.76630761 | 12.0994739  | 19.06368632 | 8.607134033 | 11.32952219 | 13.74951464 | 19.67304832 |
| ENSMUSG00000059430  | -0.281961648 | 6.2395987    | 0.439133503 | 0.507540973 | 0.999071534 | Actg2         | Actg2         | ACTG2    | 29.89669429 | 83.06535221 | 112.9633297 | 138.4866847 | 58.927708   | 175.2840471 | 37.47015492 | 28.8764651  | 63.87631659 | 41.17614764 |
| ENSMUSG00000021814  | 0.164653911  | 7.423003308  | 0.4390485   | 0.507582062 | 0.999071534 | Anxa7         | Anxa7         | ANXA7    | 157.4839953 | 184.3920381 | 156.0482708 | 162.4928935 | 179.2684213 | 145.960896  | 175.0548689 | 183.7593234 | 174.5795516 | 179.3449986 |
| ENSMUSG00000020363  | 0.434962958  | 0.654971356  | 0.438987509 | 0.507611547 | 0.999071534 | Gfpt2         | Gfpt2         | GFPT2    | 1.824680872 | 0.889350666 | 2.692808814 | 0.277528426 | 0.719428178 | 3.274297269 | 1.941458804 | 1.174401691 | 1.099961171 | 0.849666539 |
| ENSMUSG00000030424  | 0.737135078  | -0.256803878 | 0.438728596 | 0.507736747 | 0.999071534 | Zfp939        | Zfp939        |          | 0           | 1.48225111  | 0           | 0.832585279 | 0.39241537  | 1.45524323  | 1.164875283 | 0.759906976 | 0.942823861 | 0           |
| ENSMUSG00000090257  | -0.888502631 | -0.928420889 | 0.438625839 | 0.507786451 | 0.999071534 | Gm4524        | Gm4524        |          | 0.140360067 | 1.48225111  | 0           | 0.485674746 | 0.457817931 | 0.291048646 | 1.035444696 | 0           | 0           | 0           |
| ENSMUSG00000006728  | 0.173600006  | 8.849144866  | 0.438468597 | 0.507862526 | 0.999071534 | Cdk4          | Cdk4          | CDK4     | 485.9967323 | 376.7289422 | 452.5265211 | 401.8611611 | 537.2166409 | 469.0976553 | 628.5149303 | 497.3245748 | 327.6312918 | 444.5716766 |
| ENSMUSG00000025144  | 0.194574568  | 3.981277969  | 0.43805349  | 0.508063452 | 0.999071534 | Stra13        | Stra13        | STRA13   | 17.61518842 | 9.96072746  | 14.67580803 | 16.51294136 | 17.00466601 | 16.4442485  | 24.46238094 | 12.50392388 | 12.49241616 | 14.96720287 |
| ENSMUSG000000001729 | -0.196554683 | 7.363383657  | 0.438017531 | 0.508080864 | 0.999071534 | Akt1          | Akt1          | AKT1     | 258.7537837 | 184.8663585 | 169.9835564 | 116.9088495 | 188.0977672 | 304.0003108 | 168.0009019 | 105.1434925 | 82.02567592 | 119.672264  |
| ENSMUSG00000018405  | 0.176053215  | 3.94329441   | 0.437879427 | 0.508147745 | 0.999071534 | Mrm1          | Mrm1          | MRM1     | 18.03626862 | 16.77908257 | 12.2522801  | 13.18260024 | 14.25775843 | 15.71662689 | 15.79053161 | 17.89235517 | 12.17814154 | 16.40510009 |
| ENSMUSG00000034636  | -0.167194911 | 4.739633656  | 0.43750203  | 0.50833059  | 0.999071534 | Zyg11b        | Zyg11b        | ZYG11B   | 36.28307734 | 36.81911758 | 23.42743668 | 20.60648565 | 29.69276296 | 37.2542267  | 27.56871502 | 25.21509512 | 16.1065743  | 17.11227938 |
| ENSMUSG00000021678  | 0.385521991  | 2.112749916  | 0.437459789 | 0.508351062 | 0.999071534 | F2rl1         | F2rl1         | F2RL1    | 1.263240604 | 4.209593153 | 8.011106221 | 4.371072713 | 0.784830739 | 8.658697221 | 5.75966112  | 5.526596192 | 1.964216377 | 2.091486864 |

|                     |              |              |             |             |             |               |          |            |             |             |             |             |             |             |             |             |             |             |
|---------------------|--------------|--------------|-------------|-------------|-------------|---------------|----------|------------|-------------|-------------|-------------|-------------|-------------|-------------|-------------|-------------|-------------|-------------|
| ENSMUSG00000095463  | 0.173308239  | 4.00415396   | 0.437425008 | 0.50836792  | 0.999071534 | Entpd4        | Entpd4   | ENTPD4     | 16.35194782 | 19.32855448 | 16.08953266 | 11.37866547 | 14.78097892 | 19.50025929 | 16.37296925 | 17.54694291 | 11.94243557 | 16.73189491 |
| ENSMUSG00000081551  | -0.672567988 | 0.005023658  | 0.4373252   | 0.508416301 | 0.999071534 | Gm14654       | Gm14654  |            | 1.19306057  | 1.897281421 | 0.06732022  | 1.595788451 | 0.719428178 | 0.800383777 | 0.841298815 | 1.657978857 | 0           | 0           |
| ENSMUSG00000046207  | 0.299594365  | 1.808531635  | 0.437288586 | 0.508434051 | 0.999071534 | Pik3r6        | Pik3r6   | PIK3R6     | 5.333682549 | 3.49811262  | 2.423527932 | 1.873316877 | 2.681505025 | 4.656778337 | 2.653327033 | 3.45412262  | 3.771295445 | 3.398666154 |
| ENSMUSG00000042851  | 0.322201063  | 3.487542102  | 0.437251963 | 0.508451807 | 0.999071534 | Zc3h6         | Zc3h6    | ZC3H6      | 5.614402683 | 7.52983564  | 14.60848781 | 14.50086027 | 8.371527884 | 5.23887563  | 2.847472913 | 15.47446934 | 14.53520119 | 18.62730488 |
| ENSMUSG00000022516  | -0.170145396 | 5.016199691  | 0.437091979 | 0.508529383 | 0.999071534 | Nudt16l1      | Nudt16l1 | NUDT16L1   | 45.75738187 | 26.14690958 | 27.33200946 | 44.82084083 | 32.50507311 | 40.31023748 | 38.05259257 | 21.83005496 | 17.28510412 | 32.48340536 |
| ENSMUSG00000022265  | -0.194545746 | 7.979154517  | 0.436900384 | 0.508622315 | 0.999071534 | Ank           | Ank      | ANKH       | 254.9640619 | 296.390932  | 223.5704518 | 348.1594107 | 268.1505025 | 395.6078722 | 289.9892301 | 124.2102494 | 166.9583921 | 195.8808166 |
| ENSMUSG00000033624  | 0.458327333  | 1.366824963  | 0.436810876 | 0.50866574  | 0.999071534 | Pdpr          | Pdpr     | PDPR       | 2.105401006 | 4.921073686 | 0.134640441 | 2.358991623 | 1.111843547 | 5.820972922 | 4.918362304 | 1.174401691 | 1.021392516 | 1.568615148 |
| ENSMUSG00000021645  | 0.17121517   | 4.843684578  | 0.436492031 | 0.50882048  | 0.999071534 | Smn1          | Smn1     | SMN2       | 26.03679244 | 27.27342043 | 28.34181276 | 23.3123878  | 35.05577302 | 36.59936725 | 45.88314308 | 20.24115855 | 16.02800564 | 30.71871332 |
| ENSMUSG000000005198 | -0.183596948 | 6.336531409  | 0.436445091 | 0.508843268 | 0.999071534 | Polr2a        | Polr2a   | POLR2A     | 58.45996794 | 86.32630466 | 111.6842455 | 91.02932379 | 96.86119372 | 92.11689649 | 33.45780673 | 94.43571242 | 62.85492408 | 82.48301321 |
| ENSMUSG00000030043  | 0.486700994  | 0.890394116  | 0.43624223  | 0.50894177  | 0.999071534 | Tacr1         | Tacr1    | TACR1      | 3.017741442 | 0.652190488 | 1.817645949 | 0.971349492 | 0.981038424 | 5.23887563  | 1.876743511 | 1.4507315   | 0           | 2.0261279   |
| ENSMUSG00000032612  | -0.157909528 | 5.998035664  | 0.436006309 | 0.509056365 | 0.999071534 | Usp4          | Usp4     | USP4       | 85.68982095 | 75.77267675 | 66.10845638 | 60.63996112 | 61.74001815 | 114.5726422 | 49.89549127 | 43.66010991 | 40.777132   | 53.98650468 |
| ENSMUSG00000068699  | -0.161767158 | 4.599100247  | 0.435869653 | 0.509122765 | 0.999071534 | Flnc          | Flnc     | FLNC       | 28.07201342 | 31.60159367 | 24.36991976 | 22.75733095 | 25.63780415 | 36.23555644 | 24.46238094 | 17.2706131  | 14.22092657 | 21.04558657 |
| ENSMUSG00000021764  | 0.180500392  | 7.185287238  | 0.435800065 | 0.509156582 | 0.999071534 | Ndufs4        | Ndufs4   | NDUFS4     | 175.5202639 | 107.4335605 | 133.5633172 | 171.7900958 | 116.5473648 | 112.9996368 | 205.082765  | 131.9474841 | 134.6666748 | 149.9988235 |
| ENSMUSG00000018999  | -0.181171025 | 4.688936286  | 0.435664356 | 0.509222544 | 0.999071534 | Slc35b4       | Slc35b4  | SLC35B4    | 26.87895285 | 31.06798327 | 27.33200946 | 24.28373729 | 32.37426799 | 40.81957261 | 33.45780673 | 16.23437631 | 11.23531768 | 19.47697142 |
| ENSMUSG00000009406  | -0.152838945 | 4.815584391  | 0.435572138 | 0.509267375 | 0.999071534 | Elk1          | Elk1     | ELK1       | 29.54579412 | 30.83082309 | 32.58298665 | 24.63064782 | 36.03681144 | 28.88657812 | 24.20351976 | 33.50498941 | 20.50641898 | 21.11094554 |
| ENSMUSG000000074577 | 0.547327655  | -0.214477212 | 0.435519447 | 0.509292994 | 0.999071534 | Fam65c        | Fam65c   | FAM65C     | 0.912340436 | 0.592900444 | 0.875162864 | 0.346910533 | 0.327012808 | 0.800383777 | 1.747312924 | 0.621742072 | 0           | 1.111102397 |
| ENSMUSG00000021904  | -0.379620283 | 1.115954657  | 0.435436493 | 0.50933333  | 0.999071534 | Sema3g        | Sema3g   | SEMA3G     | 1.965040939 | 1.778701332 | 2.962089695 | 2.567137942 | 2.616102464 | 5.020589145 | 1.423736457 | 0.552659619 | 1.178529826 | 0.980384468 |
| ENSMUSG00000035125  | 0.339777708  | 1.781357326  | 0.435272604 | 0.509413038 | 0.999071534 | Gcfc2         | Gcfc2    | GCFC2      | 5.684582717 | 3.853852886 | 2.086926831 | 0.901967385 | 2.812310149 | 7.130691829 | 2.847472913 | 3.108710358 | 2.985608894 | 2.352927222 |
| ENSMUSG00000026803  | -0.190737288 | 4.006665289  | 0.435219586 | 0.509438828 | 0.999071534 | Ttf1          | Ttf1     | TTF1       | 16.42212785 | 14.11103057 | 18.8496617  | 23.3123878  | 14.91178404 | 15.57110257 | 10.03087049 | 16.85611838 | 12.57098482 | 16.53581802 |
| ENSMUSG00000028141  | 0.451786272  | 2.378520057  | 0.435166026 | 0.509464884 | 0.999071534 | Oaz3          | Oaz3     | OA23       | 1.122880537 | 1.778701332 | 9.088229746 | 7.978942253 | 1.896674286 | 1.600767553 | 1.359021163 | 3.799534882 | 11.62816095 | 7.516280918 |
| ENSMUSG00000040351  | 0.154277924  | 5.216458115  | 0.434976431 | 0.509557138 | 0.999071534 | Ankib1        | Ankib1   | ANKIB1     | 36.63397751 | 38.12349855 | 40.39213221 | 32.12391533 | 34.92496789 | 61.84783729 | 37.34072434 | 24.31702324 | 36.53442462 | 31.37230296 |
| ENSMUSG00000022367  | -0.214939969 | 4.904137414  | 0.434921321 | 0.509583959 | 0.999071534 | Has2          | Has2     | HAS2       | 26.73859278 | 34.50680584 | 57.82806927 | 26.57334681 | 20.34019666 | 35.50793482 | 41.41778783 | 29.63637208 | 16.1065743  | 13.20251083 |
| ENSMUSG00000029486  | 0.157017833  | 5.079137936  | 0.434875972 | 0.509606031 | 0.999071534 | Mrpl1         | Mrpl1    | MRPL1      | 34.59875654 | 30.65295296 | 31.84246422 | 37.18880911 | 30.60839883 | 33.83440511 | 52.67824889 | 32.53783508 | 23.25632191 | 29.86904678 |
| ENSMUSG000000000131 | 0.152675994  | 5.439343003  | 0.43467034  | 0.509706137 | 0.999071534 | Xpo6          | Xpo6     | XPO6       | 39.65171895 | 58.22282361 | 36.21827854 | 31.98515112 | 47.54766228 | 72.76216152 | 36.6935714  | 44.48909934 | 31.19175607 | 40.58791696 |
| ENSMUSG00000038011  | 0.521502695  | 0.113476056  | 0.434379018 | 0.509848017 | 0.999071534 | Dnah10        | Dnah10   | DNAH10     | 0.491260235 | 1.48225111  | 0.807842644 | 0.555056852 | 0.784830739 | 0.291048646 | 0.388291761 | 0.759906976 | 2.749902928 | 0.784307574 |
| ENSMUSG00000029499  | -0.600108195 | 0.198501661  | 0.434223023 | 0.509924017 | 0.999071534 | Pxmp2         | Pxmp2    | PXMP2      | 1.263240604 | 0.059290044 | 1.750325729 | 1.110113705 | 2.158284533 | 1.309718907 | 1.876743511 | 0.345412262 | 0.471411931 | 0           |
| ENSMUSG00000078439  | -0.502202071 | 0.260237574  | 0.434218621 | 0.509926162 | 0.999071534 | 2210404O07Rik | Smim24   | SMIM24     | 1.333420637 | 1.778701332 | 0.538561763 | 0.555056852 | 2.289089656 | 0.9459081   | 1.164875283 | 1.243484143 | 0           | 0.980384468 |
| ENSMUSG00000097935  | -0.66164717  | -0.657902128 | 0.434166827 | 0.509951401 | 0.999071534 | Gm3809        | Gm3809   |            | 0.701800335 | 0.474320355 | 1.481044848 | 0.069382107 | 0.457817931 | 0.218286485 | 0.129430587 | 1.105319238 | 0           | 0.392153787 |
| ENSMUSG00000032216  | -0.191065753 | 9.135644564  | 0.434121138 | 0.509973667 | 0.999071534 | Nedd4         | Nedd4    | NEDD4      | 417.1501194 | 807.0560845 | 593.7643434 | 586.5563288 | 708.6367549 | 684.1098426 | 299.0493712 | 658.0103591 | 420.8922854 | 490.0615159 |
| ENSMUSG00000057766  | 0.215681143  | 4.281140737  | 0.434095343 | 0.509986237 | 0.999071534 | Ankrd29       | Ankrd29  | ANKRD29    | 14.66762701 | 11.97658897 | 21.87907161 | 22.82671305 | 20.92881971 | 13.6065242  | 14.36679515 | 16.09621141 | 26.55620542 | 25.68607305 |
| ENSMUSG00000027865  | -0.190846872 | 3.671497442  | 0.433940299 | 0.51006181  | 0.999071534 | Gdap2         | Gdap2    | GDAP2      | 14.73780704 | 16.66050248 | 13.46404407 | 11.79495811 | 13.27672    | 19.13644848 | 12.81362811 | 9.602460883 | 7.071178959 | 10.06528053 |
| ENSMUSG00000053907  | 0.216839039  | 6.740779672  | 0.43380582  | 0.510127375 | 0.999071534 | Mat2a         | Mat2a    | MAT2A      | 139.0968265 | 90.29873763 | 74.99472546 | 103.8650135 | 105.2981242 | 212.8293225 | 181.2028217 | 51.19009722 | 49.02684078 | 90.7836017  |
| ENSMUSG00000048490  | 0.172829489  | 4.215255669  | 0.433642197 | 0.510207168 | 0.999071534 | Nrip1         | Nrip1    | NRI1P      | 14.73780704 | 21.64086621 | 18.37842015 | 15.95788451 | 19.35915823 | 24.9574214  | 15.27280926 | 23.83344608 | 16.1065743  | 14.70576701 |
| ENSMUSG00000022199  | 0.470954873  | -0.272903152 | 0.433618276 | 0.510218835 | 0.999071534 | Slc22a17      | Slc22a17 | AL049829.1 | 0.701800335 | 0.948640711 | 0.269280881 | 0.693821065 | 0.39241537  | 1.018670261 | 1.035444696 | 0.414494714 | 0.628549241 | 0.849666539 |
| ENSMUSG00000023965  | -0.169392735 | 4.685935259  | 0.433030666 | 0.510505582 | 0.999071534 | Fbxl17        | Fbxl17   | FBXL17     | 37.19541778 | 33.380295   | 22.01371205 | 20.67586775 | 28.25390661 | 38.41842128 | 27.50399973 | 16.71795348 | 15.47802505 | 21.82989414 |
| ENSMUSG00000024743  | 0.317090275  | 3.981685565  | 0.43289868  | 0.510570027 | 0.999071534 | Syt7          | Syt7     | SYT7       | 14.17636678 | 20.51435536 | 13.93528561 | 7.215739081 | 17.2008737  | 5.23887563  | 4.659501131 | 37.23544184 | 13.35667137 | 20.32663796 |
| ENSMUSG00000035529  | 0.141424146  | 5.186087825  | 0.432785176 | 0.51062546  | 0.999071534 | Prdm4         | Prdm4    | PRDM4      | 38.59901845 | 42.80741206 | 31.30390246 | 27.40593209 | 39.76475745 | 50.56970226 | 37.6643008  | 31.84701055 | 25.92765618 | 40.91471178 |
| ENSMUSG00000021280  | 0.232645149  | 3.31882038   | 0.43273002  | 0.510652401 | 0.999071534 | Exoc3l4       | Exoc3l4  | EXOC3L4    | 10.6673651  | 6.46261484  | 9.492151068 | 11.37866547 | 8.829345815 | 7.057929668 | 13.97850339 | 6.770080335 | 10.29249382 | 12.22212636 |
| ENSMUSG000000339988 | 0.166866098  | 6.516028355  | 0.432442242 | 0.510793004 | 0.999071534 | Ankrd13c      | Ankrd13c | ANKRD13C   | 79.86487817 | 66.46413978 | 103.9424202 | 110.9419884 | 83.19205835 | 102.5946477 | 74.09901103 | 72.81290482 | 113.217432  | 95.55480611 |

|                     |              |              |             |             |             |               |               |               |             |             |             |             |             |             |             |             |             |             |
|---------------------|--------------|--------------|-------------|-------------|-------------|---------------|---------------|---------------|-------------|-------------|-------------|-------------|-------------|-------------|-------------|-------------|-------------|-------------|
| ENSMUSG00000031402  | 0.158991361  | 7.044036097  | 0.432377674 | 0.51082456  | 0.999071534 | Mpp1          | Mpp1          | MPP1          | 123.0957788 | 110.9316731 | 132.3515532 | 123.6389139 | 157.1623555 | 112.7085882 | 157.5170243 | 151.9813953 | 115.1816484 | 126.2735194 |
| ENSMUSG00000014956  | 0.191030559  | 7.917394881  | 0.432283195 | 0.510870741 | 0.999071534 | Ppp1cb        | Ppp1cb        | PPP1CB        | 240.647335  | 313.762915  | 160.5587255 | 211.3378965 | 248.0719161 | 262.3075923 | 404.9235913 | 237.0218942 | 164.7548697 | 184.9658695 |
| ENSMUSG00000031681  | 0.175812212  | 5.898609037  | 0.432268424 | 0.510877961 | 0.999071534 | Smad1         | Smad1         | SMAD1         | 42.80982046 | 57.62992316 | 69.54178761 | 57.86467686 | 61.80542071 | 52.31599413 | 36.56414082 | 70.60226635 | 77.39012527 | 58.03876048 |
| ENSMUSG000000025199 | 0.139324494  | 5.491593075  | 0.432175776 | 0.510923255 | 0.999071534 | Chuk          | Chuk          | CHUK          | 45.4064817  | 52.41239926 | 41.06533441 | 41.55988182 | 41.26901637 | 51.22456171 | 52.03109596 | 36.54461732 | 44.39129013 | 41.82973728 |
| ENSMUSG00000031109  | 0.196813962  | 3.916768873  | 0.432165345 | 0.510928355 | 0.999071534 | Enox2         | Enox2         | ENOX2         | 16.42212785 | 20.39577528 | 9.559471289 | 12.35001497 | 13.93074562 | 21.02826468 | 20.32060215 | 10.77686257 | 9.663944577 | 17.1240487  |
| ENSMUSG00000022420  | 0.200157028  | 4.381320889  | 0.431815636 | 0.511099385 | 0.999071534 | DnaI4         | DnaI4         | DNAL4         | 14.52726694 | 18.20204363 | 22.01371205 | 17.13738032 | 28.38471173 | 17.3901566  | 12.29590576 | 27.63298096 | 17.52081009 | 30.71871332 |
| ENSMUSG00000069014  | -0.553223815 | 7.135563864  | 0.431663338 | 0.511173901 | 0.999071534 | Gm5641        | Gm5641        |               | 205.4169582 | 282.0427412 | 81.72674749 | 33.51155746 | 279.9883662 | 317.2430242 | 152.2103703 | 77.51051159 | 0           | 64.31322107 |
| ENSMUSG00000038593  | 0.211848734  | 4.39333673   | 0.431661036 | 0.511175027 | 0.999071534 | Tctn1         | Tctn1         | TCTN1         | 14.73780704 | 20.92938568 | 19.45554368 | 19.01069719 | 22.56388375 | 13.16995124 | 11.00159989 | 29.36004227 | 18.22792798 | 30.06512367 |
| ENSMUSG00000041058  | 0.141308161  | 5.26669291   | 0.431292097 | 0.511355616 | 0.999071534 | Wwp1          | Wwp1          | WWP1          | 33.54605603 | 46.83913508 | 32.85226753 | 34.9685817  | 41.46522405 | 49.18722119 | 46.01257366 | 33.91948413 | 26.00622484 | 42.15653211 |
| ENSMUSG00000080486  | 0.601311997  | -0.086930755 | 0.431243594 | 0.511379366 | 0.999071534 | Snord100      | Snord100      | SNORD100      | 1.965040939 | 0.059290044 | 0           | 0.693821065 | 0.654025616 | 1.746291877 | 1.100159989 | 0.621742072 | 0.864255206 | 0.522871716 |
| ENSMUSG00000031879  | 0.153666671  | 6.137477103  | 0.431202141 | 0.511399665 | 0.999071534 | Fam96b        | Fam96b        | FAM96B        | 62.24968975 | 55.91051188 | 74.86008502 | 74.03070769 | 77.63284061 | 53.3346644  | 78.88794275 | 68.46071032 | 67.49047473 | 82.54837217 |
| ENSMUSG00000038909  | -0.191040522 | 5.387432365  | 0.431003803 | 0.511496808 | 0.999071534 | Kat7          | Kat7          | KAT7          | 40.49387935 | 68.12426102 | 37.09344141 | 28.37728158 | 58.53529263 | 72.32558855 | 42.12965606 | 35.92287524 | 16.02800564 | 31.37230296 |
| ENSMUSG00000040549  | -0.143533581 | 6.040660889  | 0.43082446  | 0.511584675 | 0.999071534 | Ckap5         | Ckap5         | CKAP5         | 72.91705485 | 76.06912697 | 66.78165858 | 62.92957064 | 80.11813796 | 103.0312207 | 47.30687953 | 54.09156022 | 43.13419165 | 62.54852903 |
| ENSMUSG00000060675  | -0.148223569 | 6.483814188  | 0.430775746 | 0.511608547 | 0.999071534 | Pla2g16       | Pla2g16       | PLA2G16       | 117.7620963 | 73.10462475 | 92.56530297 | 104.2813061 | 99.54269875 | 76.4002696  | 80.05281803 | 79.09940799 | 71.57604479 | 98.82275433 |
| ENSMUSG00000036352  | -0.21890283  | 4.93846384   | 0.430735288 | 0.511628374 | 0.999071534 | Ubac1         | Ubac1         | UBAC1         | 56.35456693 | 31.7794638  | 25.58168373 | 31.22194795 | 26.03021952 | 50.78798874 | 43.61810781 | 16.09621141 | 10.44963113 | 22.67956068 |
| ENSMUSG00000038845  | 0.160672561  | 6.898133572  | 0.43065349  | 0.511668465 | 0.999071534 | Phb           | Phb           | PHB           | 129.622522  | 92.37388919 | 141.3051425 | 102.9630461 | 118.4440391 | 132.5726583 | 174.4077159 | 86.4912304  | 97.42513232 | 118.6918795 |
| ENSMUSG00000047989  | 0.145982759  | 5.243500098  | 0.430584205 | 0.511702427 | 0.999071534 | Ino80c        | Ino80c        | RP11-322E11.6 | 38.94991862 | 29.46715207 | 36.68952009 | 40.72729654 | 39.89556257 | 39.72814019 | 46.40086542 | 33.02141224 | 37.00583655 | 33.85594361 |
| ENSMUSG00000045231  | 0.432653115  | 0.807559351  | 0.430503258 | 0.51174211  | 0.999071534 | BC106179      | BC106179      |               | 1.684320805 | 0.5336104   | 1.346404407 | 2.705902155 | 0.850233301 | 1.382481069 | 0.711868228 | 1.934308667 | 3.457020824 | 1.045743432 |
| ENSMUSG00000050549  | 0.27550914   | 2.312587296  | 0.430417601 | 0.511784109 | 0.999071534 | 5730508B09Rik | 5730508B09Rik | C4orf32       | 5.684582717 | 5.573264174 | 2.423527932 | 5.203657991 | 3.793348573 | 4.511254014 | 6.795105815 | 5.18118393  | 2.592765618 | 6.666614379 |
| ENSMUSG00000030083  | -0.228562922 | 3.906119863  | 0.430038067 | 0.51197027  | 0.999071534 | Abtb1         | Abtb1         | ABTB1         | 15.29924731 | 15.8897319  | 18.8496617  | 15.81912029 | 17.33167882 | 10.18670261 | 6.083237587 | 24.3861057  | 10.92104306 | 13.26786979 |
| ENSMUSG00000089862  | 0.181568301  | 3.9441       | 0.429897989 | 0.512039008 | 0.999071534 | Gm16039       | Umad1         | UMAD1         | 15.65014748 | 11.73942879 | 16.15685288 | 13.66827499 | 17.13547114 | 16.80805931 | 20.90303979 | 17.06336574 | 9.192532646 | 15.16327977 |
| ENSMUSG00000056220  | 0.157773308  | 6.05258009   | 0.429829082 | 0.512072827 | 0.999071534 | Pla2g4a       | Pla2g4a       | PLA2G4A       | 59.23194831 | 79.98226991 | 57.35682773 | 48.7756209  | 81.29538406 | 75.30883718 | 74.81087926 | 94.91928959 | 41.56281855 | 63.65970986 |
| ENSMUSG00000019795  | 0.144452086  | 6.730876983  | 0.429817358 | 0.512078581 | 0.999071534 | Pcmt1         | Pcmt1         | PCMT1         | 114.3232746 | 100.6152054 | 97.41235883 | 101.2978756 | 109.8763035 | 110.2346747 | 144.8328268 | 103.5545961 | 77.46869393 | 103.6593177 |
| ENSMUSG00000032571  | -0.210450386 | 3.715657664  | 0.429634113 | 0.512168538 | 0.999071534 | Plk3r4        | Plk3r4        | PIK3R4        | 14.17636678 | 17.54985314 | 11.51175768 | 13.25198235 | 16.08903015 | 19.64578361 | 10.8721693  | 11.88218181 | 4.16413872  | 14.1828953  |
| ENSMUSG00000043411  | 0.140327319  | 5.613400026  | 0.429609832 | 0.51218046  | 0.999071534 | Usp48         | Usp48         | USP48         | 50.45944412 | 43.69676273 | 50.08624393 | 45.44527979 | 51.6026211  | 57.4821076  | 35.20511965 | 60.44714584 | 38.34150369 | 56.47014533 |
| ENSMUSG00000087107  | 0.200078433  | 5.186409877  | 0.429424506 | 0.512271469 | 0.999071534 | Al662270      | Al662270      |               | 48.07332298 | 17.01624274 | 42.34441859 | 34.89919959 | 32.89748848 | 46.64054554 | 43.74753839 | 16.85611838 | 41.32711258 | 37.97355838 |
| ENSMUSG00000097194  | 0.373652186  | 0.936842497  | 0.429298033 | 0.512333594 | 0.999071534 | 9330175E14Rik | 9330175E14Rik |               | 1.333420637 | 2.193731643 | 2.086926831 | 1.457024238 | 0.981038424 | 1.382481069 | 0.776583522 | 3.246875263 | 2.042785033 | 2.0261279   |
| ENSMUSG00000029029  | -0.196188391 | 3.642380091  | 0.429265066 | 0.512349789 | 0.999071534 | Wrap73        | Wrap73        | WRAP73        | 18.31698875 | 9.427117061 | 14.81044848 | 14.22333184 | 11.64165596 | 14.33414582 | 13.00777399 | 9.049801264 | 9.742513232 | 9.803844676 |
| ENSMUSG00000031362  | -0.647061492 | 0.359679549  | 0.429108602 | 0.512426668 | 0.999071534 | Xlr4c         | Xlr4c         |               | 3.509001677 | 1.126510844 | 2.490848153 | 0           | 0.196207685 | 1.309718907 | 1.553167044 | 0.345412262 | 0           | 1.30717929  |
| ENSMUSG00000048498  | 0.622889883  | 0.263746295  | 0.429049573 | 0.512455677 | 0.999071534 | Cd300e        | Cd300e        | CD300E        | 1.052700503 | 0.711480533 | 0.471241542 | 0           | 2.158284533 | 3.128772945 | 2.135604685 | 0.967154334 | 0           | 0.522871716 |
| ENSMUSG00000022507  | 0.175854087  | 6.208403653  | 0.429020768 | 0.512469834 | 0.999071534 | 1810013L24Rik | 1810013L24Rik | C16orf72      | 49.61728371 | 80.93091062 | 82.60191036 | 67.50878967 | 79.00629441 | 68.90576696 | 46.59501131 | 117.8546638 | 62.4620808  | 77.97324465 |
| ENSMUSG00000029810  | -0.239223684 | 3.657716379  | 0.428656828 | 0.512648759 | 0.999071534 | Tmem176b      | Tmem176b      | TMEM176B      | 10.456825   | 17.72772328 | 16.76273487 | 7.701413827 | 17.98570444 | 24.30256195 | 12.42533635 | 6.286503168 | 5.656943167 | 9.86920364  |
| ENSMUSG00000021567  | -0.462643266 | 0.816508607  | 0.428447784 | 0.512751582 | 0.999071534 | Nkd2          | Nkd2          | NKD2          | 1.052700503 | 2.845922132 | 3.096730136 | 2.081463196 | 0.588623054 | 3.929156722 | 1.68259763  | 0.207247357 | 0.392843275 | 0.980384468 |
| ENSMUSG00000004980  | 0.17600845   | 9.377067691  | 0.428323903 | 0.512812532 | 0.999071534 | Hnrnpa2b1     | Hnrnpa2b1     | HNRNPA2B1     | 531.9646542 | 504.4988979 | 816.9308738 | 608.7586029 | 778.0942753 | 915.3479919 | 661.9080217 | 497.808152  | 656.2050474 | 688.4259731 |
| ENSMUSG00000030657  | -0.256969217 | 3.211121121  | 0.427629002 | 0.51315466  | 0.999071534 | Xylt1         | Xylt1         | XYLT1         | 7.509263589 | 17.84630337 | 5.654889509 | 8.742145425 | 11.96866877 | 9.313556675 | 4.659501131 | 11.95126426 | 5.106962581 | 9.411690889 |
| ENSMUSG00000001289  | 0.203072886  | 8.082404023  | 0.427454264 | 0.513240753 | 0.999071534 | Pfdn5         | Pfdn5         | PFDN5         | 305.3533259 | 243.0891821 | 209.1639246 | 312.2194795 | 233.6833526 | 143.1231717 | 351.1451824 | 302.7193064 | 269.1762124 | 293.3310327 |
| ENSMUSG00000023277  | -0.201023297 | 5.236141151  | 0.427423336 | 0.513255994 | 0.999071534 | Twf2          | Twf2          | TWF2          | 60.63554898 | 25.67258923 | 47.86467666 | 36.77251647 | 37.99888829 | 63.73965349 | 47.43631012 | 16.57978857 | 19.56359512 | 29.15009817 |
| ENSMUSG00000029373  | -0.220947729 | 5.290967575  | 0.427331893 | 0.51330106  | 0.999071534 | Pf4           | Pf4           | PF4V1         | 46.95044244 | 42.92599215 | 36.95880097 | 52.24472623 | 38.19509597 | 45.54911311 | 73.12828163 | 23.90252853 | 10.29249382 | 27.77755991 |
| ENSMUSG00000029456  | -0.267845528 | 2.258332161  | 0.427322306 | 0.513305785 | 0.999071534 | Acad10        | Acad10        | ACAD10        | 4.982782381 | 5.869714396 | 2.894769475 | 7.909560147 | 4.51277675  | 4.80230266  | 4.530070544 | 3.523205072 | 3.457020824 | 4.117614764 |

|                     |              |              |             |             |             |               |               |          |             |             |             |             |             |             |             |             |             |             |
|---------------------|--------------|--------------|-------------|-------------|-------------|---------------|---------------|----------|-------------|-------------|-------------|-------------|-------------|-------------|-------------|-------------|-------------|-------------|
| ENSMUSG00000033788  | -0.164399586 | 5.718478343  | 0.426760874 | 0.513582633 | 0.999071534 | Dysf          | Dysf          | DYSF     | 50.17872398 | 58.3414037  | 66.24309682 | 50.02449882 | 63.76749756 | 85.71382627 | 28.47472913 | 49.39395346 | 27.18475466 | 57.4505298  |
| ENSMUSG00000055296  | 0.149859705  | 5.816681227  | 0.426629453 | 0.513647476 | 0.999071534 | Tmem245       | Tmem245       | TMEM245  | 46.95044244 | 57.8077933  | 63.2136869  | 57.79529476 | 50.22916731 | 62.50269675 | 38.63503021 | 53.81523041 | 63.1691987  | 63.46355453 |
| ENSMUSG00000006720  | 0.339269454  | 1.372589079  | 0.426391365 | 0.513764984 | 0.999071534 | Zfp184        | Zfp184        | ZNF184   | 1.894860906 | 2.786632087 | 2.01960661  | 1.665170557 | 2.943115272 | 3.783632399 | 3.235764674 | 2.210638477 | 3.221314859 | 0.784307574 |
| ENSMUSG00000007646  | 0.219820474  | 3.090207271  | 0.426350395 | 0.513785209 | 0.999071534 | Rad51c        | Rad51c        | RAD51C   | 9.895834729 | 5.810424352 | 7.270583797 | 6.799446442 | 10.59521498 | 10.76879991 | 8.283557565 | 7.322739954 | 8.956826681 | 8.104511599 |
| ENSMUSG00000060969  | -0.133942214 | 5.754706995  | 0.426348998 | 0.513785899 | 0.999071534 | Irx1          | Irx1          | IRX1     | 61.96896962 | 56.97773268 | 62.2038836  | 48.84500301 | 63.30967962 | 73.34425881 | 38.18202315 | 50.84468496 | 36.84869924 | 53.20219711 |
| ENSMUSG00000097815  | -0.216238739 | 7.271629663  | 0.426036196 | 0.513940364 | 0.999071534 | Gm26809       | Gm26809       |          | 247.2442582 | 308.2489409 | 107.5777121 | 89.78044587 | 116.220352  | 153.0915878 | 130.9190387 | 185.693632  | 101.9035457 | 119.737623  |
| ENSMUSG00000063605  | -0.177298565 | 4.442355638  | 0.426020548 | 0.513948093 | 0.999071534 | Ccdc102a      | Ccdc102a      | CCDC102A | 18.45734882 | 18.61707394 | 34.13135171 | 23.93682676 | 23.61032474 | 29.25038893 | 14.17264927 | 20.72473572 | 12.96382809 | 22.94099654 |
| ENSMUSG00000016833  | 0.155937631  | 5.592287517  | 0.425930378 | 0.513992636 | 0.999071534 | Mirps18c      | Mirps18c      | MIRPS18C | 57.26690737 | 34.74396602 | 48.47055865 | 50.09388093 | 45.45478031 | 49.25998335 | 74.94030985 | 37.92626636 | 33.0774038  | 51.24142817 |
| ENSMUSG00000029422  | 0.143436035  | 5.944368268  | 0.425878723 | 0.514018156 | 0.999071534 | Rsrc2         | Rsrc2         | RSRC2    | 48.84530335 | 73.28249489 | 60.58819831 | 55.50568524 | 65.07554879 | 57.62763193 | 57.85547237 | 76.54335725 | 50.28393926 | 66.92757965 |
| ENSMUSG00000005917  | -0.326352531 | 1.803339343  | 0.425845118 | 0.51403476  | 0.999071534 | Otx1          | Otx1          | OTX1     | 3.930081878 | 1.660121243 | 3.231370576 | 4.648601139 | 5.886230544 | 4.80230266  | 2.329750565 | 3.246875263 | 0.864255206 | 3.725460977 |
| ENSMUSG00000089865  | 1.016817792  | -0.283200184 | 0.425524453 | 0.514193242 | 0.999071534 | Gm20510       | Gm44503       | DYX1C1   | 0.98252047  | 0           | 0.06732022  | 1.387642131 | 0           | 0           | 0           | 1.312566595 | 2.749902928 | 0           |
| ENSMUSG00000044162  | 0.503452611  | 0.375037669  | 0.425323242 | 0.514292731 | 0.999071534 | Tnlp3         | Tnlp3         | TNIP3    | 1.754500839 | 1.897281421 | 0.740522424 | 0           | 0.654025616 | 2.328389169 | 1.100159989 | 0.552659619 | 0.864255206 | 1.960768935 |
| ENSMUSG00000028133  | 0.282462573  | 2.326063115  | 0.425068541 | 0.514418715 | 0.999071534 | Rwdd3         | Rwdd3         | RWDD3    | 4.210802013 | 2.490181865 | 7.203263577 | 4.717983245 | 4.185763942 | 3.201535107 | 4.530070544 | 6.148338263 | 4.32127603  | 7.189486096 |
| ENSMUSG00000028152  | -0.157916923 | 4.456612036  | 0.425055444 | 0.514425195 | 0.999071534 | Tspan5        | Tspan5        | TSPAN5   | 19.58022936 | 23.00453723 | 21.67711095 | 28.79357422 | 25.96481695 | 21.7558863  | 23.55636683 | 18.44501479 | 16.9708295  | 18.82338178 |
| ENSMUSG00000031823  | -0.172384375 | 4.950468181  | 0.425030679 | 0.514437448 | 0.999071534 | Zdhhc7        | Zdhhc7        | ZDHHC7   | 40.56405939 | 31.60159367 | 32.38102598 | 31.01380163 | 34.14013715 | 49.33274551 | 33.65195261 | 22.38271458 | 11.15674902 | 29.86904678 |
| ENSMUSG00000017664  | -0.18892165  | 4.327067943  | 0.425019138 | 0.514443158 | 0.999071534 | Slc35c2       | Slc35c2       | SLC35C2  | 27.93165335 | 28.5778014  | 21.13854919 | 12.28063286 | 21.19042996 | 30.63287    | 19.8675951  | 14.23098519 | 9.113963991 | 19.67304832 |
| ENSMUSG00000005481  | 0.189283574  | 6.825327056  | 0.424911986 | 0.514496179 | 0.999071534 | Ddx39         | Ddx39         | DDX39A   | 128.2891013 | 82.6503219  | 117.2718238 | 116.2844106 | 104.1862806 | 160.4405662 | 199.0642427 | 55.88770399 | 81.55426399 | 98.49595951 |
| ENSMUSG00000018882  | 0.145946611  | 5.91504225   | 0.424906086 | 0.514499099 | 0.999071534 | Mrlp45        | Mrlp45        | MRPL45   | 52.63502516 | 66.28626965 | 61.86728249 | 45.5146619  | 71.48499982 | 49.551032   | 58.04961825 | 72.74382237 | 53.58382278 | 67.05829758 |
| ENSMUSG00000029640  | 0.188694918  | 5.461951238  | 0.42482669  | 0.514538393 | 0.999071534 | Usp12         | Usp12         | USP12    | 60.56536895 | 56.62199241 | 28.61109365 | 26.15705417 | 43.03488553 | 70.50653452 | 68.53349579 | 34.33397884 | 29.62038297 | 49.7689299  |
| ENSMUSG00000024659  | 0.181367108  | 9.500478541  | 0.424805844 | 0.514548711 | 0.999071534 | Anxa1         | Anxa1         | ANXA1    | 629.725441  | 592.6039938 | 728.2701437 | 787.0012346 | 776.7208215 | 537.1302764 | 839.8103635 | 710.2366931 | 773.7441154 | 764.5038078 |
| ENSMUSG00000053950  | -0.163058711 | 4.927311686  | 0.42470317  | 0.514599534 | 0.999071534 | Adnp2         | Adnp2         | ADNP2    | 32.49335553 | 36.22621713 | 28.54377342 | 29.55677739 | 39.76475745 | 44.74872934 | 24.07408917 | 36.19920505 | 14.14235792 | 23.33315033 |
| ENSMUSG00000033918  | 0.161863602  | 6.033638304  | 0.42470305  | 0.514599594 | 0.999071534 | Parl          | Parl          | PARL     | 90.04098303 | 52.17523908 | 64.08884977 | 61.61131062 | 52.64906208 | 77.05512905 | 102.314879  | 46.49249046 | 49.10540944 | 61.63350353 |
| ENSMUSG00000087286  | -0.337532075 | 1.227696497  | 0.424633408 | 0.514634072 | 0.999071534 | Gm9013        | Gm9013        |          | 1.754500839 | 2.371601776 | 3.366011017 | 2.636520049 | 2.616102464 | 2.255627007 | 2.329750565 | 1.036236786 | 0.785686551 | 3.202589261 |
| ENSMUSG00000006731  | -0.164710792 | 6.181776036  | 0.42451041  | 0.514694974 | 0.999071534 | B4galnt1      | B4galnt1      | B4GALNT1 | 92.91836441 | 90.35802768 | 60.65551853 | 57.1708558  | 99.08488082 | 112.9996368 | 81.02354744 | 57.96017756 | 33.70595304 | 57.4505298  |
| ENSMUSG00000085237  | -0.705705192 | 0.795063471  | 0.424499372 | 0.514700441 | 0.999071534 | Gm15406       | Gm15406       |          | 4.772242281 | 2.845922132 | 0.403921322 | 0           | 2.419894779 | 1.45524323  | 3.235764674 | 1.381649048 | 0           | 0           |
| ENSMUSG000000021271 | -0.21839576  | 3.357537189  | 0.424453115 | 0.514723349 | 0.999071534 | Zfp839        | Zfp839        | ZNF839   | 8.91286426  | 14.64464097 | 10.97319592 | 10.12978756 | 11.83786365 | 9.240794513 | 5.047792891 | 10.84594503 | 7.778296855 | 11.9606905  |
| ENSMUSG00000029371  | 0.219739654  | 7.529954712  | 0.424423561 | 0.514737986 | 0.999071534 | Cxc15         | Cxc15         | CXCL6    | 220.0845852 | 103.7575777 | 234.0724061 | 201.9019301 | 121.9757774 | 136.3562907 | 147.4214385 | 159.0968879 | 274.2831749 | 199.8677135 |
| ENSMUSG00000039230  | -0.173093563 | 5.082513948  | 0.424365005 | 0.514766989 | 0.999071534 | Tbcd          | Tbcd          | TBCD     | 45.75738187 | 41.62161117 | 34.06403149 | 33.02588272 | 31.58943725 | 62.72098323 | 33.65195261 | 18.8595095  | 19.17075184 | 26.1435858  |
| ENSMUSG00000001750  | 0.161377222  | 6.89027805   | 0.424243967 | 0.514826948 | 0.999071534 | Tcirg1        | Tcirg1        | TCIRG1   | 164.1510985 | 102.2160366 | 112.8286893 | 97.06556706 | 106.2791626 | 136.1380042 | 92.93116144 | 98.71882447 | 111.174647  | 163.5281292 |
| ENSMUSG00000033933  | -0.156221037 | 5.051538498  | 0.424208783 | 0.51484438  | 0.999071534 | Vhl           | Vhl           | VHLL     | 34.59875654 | 52.70884948 | 26.38952637 | 32.67897218 | 34.66335765 | 29.83248622 | 37.08186316 | 27.35665115 | 22.07779208 | 34.77096912 |
| ENSMUSG00000017307  | -0.229752229 | 3.157542777  | 0.42398598  | 0.514954789 | 0.999071534 | Acot8         | Acot8         | ACOT8    | 13.47456644 | 8.715636528 | 7.472544458 | 10.68484441 | 8.894748377 | 6.985167506 | 11.32517636 | 7.253657501 | 4.32127603  | 9.411690889 |
| ENSMUSG00000066892  | 0.211001603  | 3.470433046  | 0.423945076 | 0.514975063 | 0.999071534 | Fbxl12        | Fbxl12        | FBXL12   | 14.66762701 | 11.50226861 | 10.03071283 | 7.354503294 | 9.41796887  | 9.168032352 | 11.51932224 | 12.15851162 | 8.249708785 | 15.29399769 |
| ENSMUSG00000032295  | 0.175723509  | 4.518257791  | 0.423918263 | 0.514988354 | 0.999071534 | Man2c1        | Man2c1        | MAN2C1   | 18.45734882 | 25.19826887 | 23.62939734 | 21.99412778 | 21.64824789 | 24.9574214  | 13.20191987 | 29.22187736 | 20.27071302 | 28.43114956 |
| ENSMUSG00000024665  | 0.379500622  | 2.728913229  | 0.423514295 | 0.515188668 | 0.999071534 | Fads2         | Fads2         | FADS2    | 10.17610486 | 6.403324796 | 3.231370576 | 2.636520049 | 7.194281776 | 22.1196971  | 10.22501637 | 1.4507315   | 2.828471584 | 2.418281687 |
| ENSMUSG00000044092  | -0.336366485 | 2.68961784   | 0.423498298 | 0.515196603 | 0.999071534 | C130050O18Rik | C130050O18Rik |          | 8.211063924 | 7.292675462 | 3.837252559 | 4.162926393 | 3.727946011 | 6.403070214 | 6.730390522 | 4.62852431  | 0.471411931 | 2.745076509 |
| ENSMUSG00000061013  | -0.370490178 | 1.401002252  | 0.423349302 | 0.515270521 | 0.999071534 | Mkx           | Mkx           | MKX      | 2.807201342 | 3.557402664 | 1.548365068 | 3.399723221 | 3.335530641 | 4.074681045 | 2.653327033 | 1.105319238 | 2.514196963 | 0.392153787 |
| ENSMUSG00000079450  | 0.218096088  | 3.720182444  | 0.423344973 | 0.515272669 | 0.999071534 | 3110007F17Rik | Cldn34c1      | CLDN34   | 9.053224327 | 14.22961066 | 9.559471289 | 14.15394974 | 15.5004071  | 7.858313444 | 13.9137881  | 19.13583931 | 9.663944577 | 16.07830527 |
| ENSMUSG00000022812  | 0.184100262  | 5.962240953  | 0.423028513 | 0.51542973  | 0.999071534 | Gsk3b         | Gsk3b         | GSK3B    | 45.75738187 | 56.85915259 | 70.28231004 | 69.52087076 | 58.60069519 | 67.08671292 | 29.57488912 | 76.95785197 | 77.94010586 | 60.3916832  |
| ENSMUSG00000031652  | -0.154440312 | 5.407060048  | 0.422848046 | 0.515519335 | 0.999071534 | N4bp1         | N4bp1         | N4BP1    | 50.10854395 | 47.43203553 | 45.50846895 | 43.84949134 | 44.60454701 | 67.01395076 | 30.99862558 | 32.81416489 | 20.74212495 | 49.21530027 |

|                    |              |              |             |             |             |               |               |         |             |             |             |             |             |             |             |             |             |             |
|--------------------|--------------|--------------|-------------|-------------|-------------|---------------|---------------|---------|-------------|-------------|-------------|-------------|-------------|-------------|-------------|-------------|-------------|-------------|
| ENSMUSG00000032281 | 0.273911185  | 2.921681051  | 0.422800191 | 0.5155431   | 0.999071534 | Acsgb1        | Acsgb1        | ACS8G1  | 6.667103186 | 6.699775018 | 13.59868451 | 4.856747458 | 3.139322957 | 13.6065242  | 6.277383467 | 5.733843549 | 5.264099892 | 9.738485711 |
| ENSMUSG00000040234 | -0.176439069 | 4.554567309  | 0.422703202 | 0.515591272 | 0.999071534 | Tm7sf3        | Tm7sf3        | TM7SF3  | 29.05453389 | 28.93354167 | 23.1581558  | 26.22643628 | 21.25583252 | 31.79706459 | 31.96935498 | 15.05997462 | 14.53520119 | 15.16327977 |
| ENSMUSG00000023104 | -0.159081478 | 5.709497415  | 0.422691023 | 0.515597321 | 0.999071534 | Rfc2          | Rfc2          | RFC2    | 75.86461626 | 42.51096184 | 44.96990719 | 67.37002546 | 54.61113893 | 67.37776157 | 62.45025821 | 32.05425791 | 31.74173666 | 49.86888992 |
| ENSMUSG00000027630 | -0.155479527 | 5.420154217  | 0.422619038 | 0.51563308  | 0.999071534 | Tbl1xr1       | Tbl1xr1       | TBL1XR1 | 39.44117885 | 39.60574966 | 40.59409287 | 55.15877471 | 58.01207214 | 40.67404829 | 31.06334087 | 35.71562789 | 44.46985879 | 39.73825042 |
| ENSMUSG00000097318 | 0.414663951  | 0.267658803  | 0.422565842 | 0.515659508 | 0.999071534 | 1700007L15Rik | 1700007L15Rik |         | 0.912340436 | 1.245090933 | 0.673202203 | 0.901967385 | 1.046440986 | 1.091432423 | 1.812028217 | 0.898071881 | 1.492804447 | 0.522871716 |
| ENSMUSG00000033701 | -0.145195441 | 5.471897394  | 0.422522001 | 0.51568129  | 0.999071534 | Acbd6         | Acbd6         | ACBD6   | 45.47666174 | 47.60990566 | 51.9712101  | 41.55988182 | 55.06895686 | 43.58453475 | 29.89846559 | 52.50266382 | 30.32750087 | 46.73165962 |
| ENSMUSG00000034883 | 0.300288753  | 2.92661019   | 0.422506718 | 0.515688883 | 0.999071534 | Lrr1          | Lrr1          | LRR1    | 12.84294614 | 3.260952442 | 6.933982695 | 6.383153803 | 5.428412612 | 12.15128097 | 15.40223985 | 3.246875263 | 4.792687961 | 5.490153018 |
| ENSMUSG00000028469 | 0.174671098  | 4.525668876  | 0.422467287 | 0.515708477 | 0.999071534 | Npr2          | Npr2          | NPR2    | 20.14166963 | 22.76737705 | 27.73593078 | 19.0800793  | 22.04066326 | 25.10294573 | 13.9137881  | 29.15279491 | 18.85647722 | 29.99976471 |
| ENSMUSG00000020541 | 0.186279842  | 3.839523585  | 0.422240356 | 0.515821262 | 0.999071534 | Tom1l1        | Tom1l1        | TOM1L1  | 16.14140771 | 17.07553279 | 11.915679   | 10.12978756 | 13.93074562 | 12.80614043 | 17.66727512 | 16.99428329 | 10.52819978 | 14.64040805 |
| ENSMUSG00000034832 | -0.157748972 | 4.932351959  | 0.422178597 | 0.515851964 | 0.999071534 | Tet3          | Tet3          | TET3    | 27.65093322 | 30.29721269 | 43.89278366 | 33.02588272 | 31.19702188 | 36.45384292 | 18.31442805 | 26.87307398 | 23.49202787 | 34.57489222 |
| ENSMUSG00000020893 | 0.181029958  | 5.834577893  | 0.422133643 | 0.515874314 | 0.999071534 | Per1          | Per1          | PER1    | 75.72425619 | 56.2069621  | 53.31761451 | 56.33827052 | 35.18657814 | 74.79950204 | 31.38691734 | 75.50712047 | 34.6487769  | 80.39152634 |
| ENSMUSG00000040007 | -0.161298603 | 4.655479957  | 0.422022322 | 0.515929666 | 0.999071534 | Bahd1         | Bahd1         | BAHD1   | 24.42265167 | 25.31684896 | 30.7653407  | 28.93233843 | 27.73068612 | 34.99859969 | 17.92613629 | 25.69867229 | 12.64955347 | 26.20894477 |
| ENSMUSG00000037685 | -0.332047954 | 2.322961145  | 0.421887849 | 0.515996544 | 0.999071534 | Atp8a1        | Atp8a1        | ATP8A1  | 3.719541778 | 11.32439848 | 3.164050356 | 3.607869541 | 6.474853598 | 10.18670261 | 5.371369359 | 1.519813953 | 2.121353688 | 3.006512367 |
| ENSMUSG00000017376 | 0.161241751  | 4.424175912  | 0.421773763 | 0.516053295 | 0.999071534 | Nlk           | Nlk           | NLK     | 20.00130956 | 19.44713457 | 18.64770103 | 23.24300569 | 23.02170168 | 23.13836736 | 19.73816451 | 16.85611838 | 22.54920401 | 25.42463719 |
| ENSMUSG00000036026 | -0.145857152 | 5.440383634  | 0.421698828 | 0.516090577 | 0.999071534 | Tmem63b       | Tmem63b       | TMEM63B | 44.1432411  | 48.2028061  | 41.40193551 | 43.29443449 | 59.58173361 | 60.46535622 | 38.89389138 | 39.10066805 | 21.29210553 | 44.70553172 |
| ENSMUSG00000032531 | 0.173014411  | 5.487597619  | 0.421593084 | 0.516143195 | 0.999071534 | Amotl2        | Amotl2        | AMOTL2  | 33.61623607 | 47.6691957  | 57.96270971 | 31.22194795 | 48.46329814 | 64.75832375 | 25.17424916 | 62.65778432 | 37.24154252 | 41.2415066  |
| ENSMUSG00000047044 | 0.148481348  | 5.458733811  | 0.421590492 | 0.516144485 | 0.999071534 | D030056L22Rik | D030056L22Rik | C9orf40 | 41.82729999 | 36.34479722 | 40.0555311  | 50.51017357 | 46.50122129 | 36.81765373 | 47.11273365 | 50.2294289  | 42.89848568 | 41.63360639 |
| ENSMUSG00000071281 | 0.212592987  | 3.488913559  | 0.421283158 | 0.516297467 | 0.999071534 | Zfp71-rs1     | Zfp65         |         | 9.053224327 | 11.97658897 | 8.145746661 | 12.28063286 | 11.77246109 | 9.640605321 | 12.23119047 | 16.85611838 | 8.956826681 | 9.28097296  |
| ENSMUSG00000037890 | -0.197445764 | 3.790822198  | 0.421281106 | 0.516298489 | 0.999071534 | Wdr19         | Wdr19         | WDR19   | 14.24654681 | 20.21790514 | 12.65620142 | 10.96237283 | 18.31271725 | 14.47967014 | 10.22501637 | 17.06336574 | 6.992610304 | 13.66002358 |
| ENSMUSG00000027082 | -0.218388815 | 3.470566077  | 0.42114996  | 0.516363794 | 0.999071534 | Tfpi          | Tfpi          | TFPI    | 14.31672684 | 13.34025999 | 14.81044848 | 8.395234892 | 10.52981242 | 13.67928637 | 15.14337867 | 8.289894287 | 4.635550651 | 8.56202435  |
| ENSMUSG00000075273 | 0.203246172  | 4.04433944   | 0.421148703 | 0.51636442  | 0.999071534 | Ttc30b        | Ttc30b        | TTC30A  | 9.895384729 | 15.17825137 | 11.30979702 | 21.43907092 | 20.73261203 | 13.02442691 | 15.40223985 | 17.89235517 | 15.63516236 | 21.1763045  |
| ENSMUSG00000030058 | -0.15450908  | 7.174690761  | 0.42106769  | 0.516404768 | 0.999071534 | Copg1         | Copg1         | COPG1   | 145.6937496 | 149.2923318 | 175.8404155 | 147.0900659 | 171.7471268 | 194.5660199 | 95.90806494 | 129.3223509 | 105.0462199 | 144.9661833 |
| ENSMUSG00000027660 | -0.15343186  | 6.209619736  | 0.421021432 | 0.516427809 | 0.999071534 | Skil          | Skil          | SKIL    | 92.70782431 | 98.36218367 | 65.09865307 | 67.64755389 | 81.42618919 | 93.13556675 | 81.54126978 | 82.2772008  | 38.97005293 | 49.21530027 |
| ENSMUSG00000031373 | 0.174620092  | 7.126291715  | 0.42089325  | 0.516491666 | 0.999071534 | Car5b         | Car5b         | CASB    | 111.7266134 | 110.3980627 | 122.9267223 | 150.6285533 | 184.239016  | 107.0331396 | 133.7017963 | 139.6156363 | 149.5947193 | 167.515026  |
| ENSMUSG00000020448 | -0.189715496 | 4.429158764  | 0.420868191 | 0.516504152 | 0.999071534 | Rnf185        | Rnf185        | RNF185  | 23.29977114 | 33.9139054  | 14.81044848 | 18.80255087 | 28.18850405 | 29.6869619  | 19.73816451 | 24.73151796 | 9.035395336 | 16.47045906 |
| ENSMUSG00000075040 | 0.223801722  | 3.44950317   | 0.420865898 | 0.516505294 | 0.999071534 | Zfp408        | Zfp408        | ZNF408  | 9.825204696 | 9.367827016 | 13.12744297 | 8.395234892 | 11.05303291 | 9.459080998 | 6.018522294 | 15.26722198 | 10.13535651 | 14.37897219 |
| ENSMUSG00000015305 | -0.175229951 | 4.425235402  | 0.420472819 | 0.516701211 | 0.999071534 | Sash1         | Sash1         | SASH1   | 21.3347302  | 33.20242487 | 21.60979073 | 19.42698983 | 22.23687094 | 37.03594021 | 16.43768454 | 15.75079915 | 14.84947581 | 16.07830527 |
| ENSMUSG00000028555 | 0.559268104  | -0.236146049 | 0.420289713 | 0.516792518 | 0.999071534 | Ttc39a        | Ttc39a        | TTC39A  | 1.263240604 | 0.415030311 | 0.336601102 | 0           | 1.046440986 | 0.9459081   | 0.647152935 | 0.27632981  | 0.707117896 | 1.568615148 |
| ENSMUSG00000035969 | -0.243912765 | 5.523048776  | 0.420076963 | 0.516898644 | 0.999071534 | Rusc2         | Rusc2         | RUSC2   | 39.51135888 | 88.93506661 | 37.16076163 | 34.55228906 | 59.45092849 | 29.83248622 | 20.77360921 | 82.20811835 | 17.20653547 | 52.41788953 |
| ENSMUSG00000069206 | 0.252823428  | 2.416705913  | 0.420048786 | 0.516912702 | 0.999071534 | Zfp874a       | Zfp874a       |         | 4.631882214 | 6.225454663 | 3.433331237 | 5.550568524 | 4.774386997 | 5.529924276 | 8.283557565 | 4.421276953 | 4.242707375 | 4.901922338 |
| ENSMUSG00000039756 | 0.14218606   | 6.239627067  | 0.419793942 | 0.517039881 | 0.999071534 | Dnntp2        | Dnntp2        | DNTTP2  | 64.84635099 | 77.84782831 | 81.12086551 | 66.67620439 | 82.14561736 | 77.56446418 | 105.5506437 | 69.42786466 | 63.40490466 | 65.48968243 |
| ENSMUSG00000033904 | 0.172058504  | 3.983375465  | 0.419791178 | 0.517041261 | 0.999071534 | Ccp110        | Ccp110        | CCP110  | 14.66762701 | 13.51813012 | 17.50325729 | 14.77838869 | 16.08903015 | 24.73913492 | 16.95540689 | 14.99089217 | 12.33527885 | 12.81035704 |
| ENSMUSG00000029992 | -0.169004192 | 6.222342281  | 0.41965795  | 0.51710777  | 0.999071534 | Gfpt1         | Gfpt1         | GFPT1   | 63.51293036 | 125.2205738 | 67.1855799  | 64.38659488 | 90.64795037 | 83.16715062 | 48.73061599 | 98.85698938 | 50.67678254 | 59.14986288 |
| ENSMUSG00000000303 | -0.316612366 | 2.698413544  | 0.419619915 | 0.51712676  | 0.999071534 | Cdh1          | Cdh1          | CDH1    | 10.73754513 | 9.189956883 | 7.607184899 | 5.134275885 | 4.054958819 | 16.73529715 | 3.882917609 | 2.417885834 | 3.614158135 | 2.941153403 |
| ENSMUSG00000020677 | 0.135460417  | 5.213817371  | 0.419564772 | 0.517154295 | 0.999071534 | Ddx52         | Ddx52         | DDX52   | 33.12497583 | 38.95355918 | 39.58428956 | 28.51604579 | 43.36189834 | 44.23939421 | 36.04641847 | 37.78810146 | 29.85608894 | 39.86896835 |
| ENSMUSG00000056394 | 0.157452708  | 5.959760033  | 0.419507958 | 0.517182666 | 0.999071534 | Lig1          | Lig1          | LIG1    | 64.77617096 | 44.17108308 | 67.79146188 | 64.73350541 | 62.85186169 | 114.4548801 | 51.31922773 | 46.07799575 | 58.84792267 | 52.81004332 |
| ENSMUSG00000022982 | -0.162567484 | 7.469304307  | 0.419468183 | 0.51720253  | 0.999071534 | Sod1          | Sod1          | SOD1    | 184.3629481 | 169.9252673 | 232.7933219 | 219.9412778 | 159.778458  | 157.3845554 | 154.1518291 | 164.4162367 | 147.2376597 | 176.3384862 |
| ENSMUSG00000075327 | 0.178770718  | 3.863694935  | 0.419391716 | 0.517240722 | 0.999071534 | Zbtb2         | Zbtb2         | ZBTB2   | 15.72032751 | 16.66050248 | 12.85816209 | 10.40731598 | 14.91178404 | 21.61036197 | 12.49005164 | 17.13244819 | 10.99961171 | 12.94107497 |
| ENSMUSG00000042340 | -0.332458536 | 1.314823025  | 0.41924394  | 0.517314545 | 0.999071534 | Ctf1          | Ctf1          | CTF1    | 3.228281543 | 2.668051998 | 2.827449254 | 2.358991623 | 2.550699902 | 4.29296753  | 0.776583522 | 1.243484143 | 1.807079067 | 2.287563758 |

|                     |              |              |             |             |             |               |               |          |             |             |             |             |             |             |             |             |             |             |
|---------------------|--------------|--------------|-------------|-------------|-------------|---------------|---------------|----------|-------------|-------------|-------------|-------------|-------------|-------------|-------------|-------------|-------------|-------------|
| ENSMUSG00000039206  | -0.289375102 | 4.108843813  | 0.419142431 | 0.517365265 | 0.999071534 | Daglb         | Daglb         | DAGLB    | 28.14219345 | 26.44335981 | 9.357510628 | 14.91715291 | 19.48996336 | 29.54143758 | 25.88611739 | 6.217420715 | 2.749902928 | 15.16327977 |
| ENSMUSG00000044340  | -0.216736401 | 3.654232667  | 0.418669368 | 0.517601752 | 0.999071534 | Phlpp1        | Phlpp1        | PHLPP1   | 13.12366627 | 20.09932505 | 10.63659481 | 7.423885401 | 18.83593774 | 20.2278809  | 8.9307105   | 9.464295978 | 7.071178959 | 11.9606905  |
| ENSMUSG000000006527 | -0.166936898 | 4.038102961  | 0.418665143 | 0.517603865 | 0.999071534 | Sfmbt1        | Sfmbt1        | SFMBT1   | 17.68536845 | 22.64879696 | 15.887572   | 14.50086027 | 19.03214542 | 21.10102684 | 14.49622574 | 14.23098519 | 10.52819978 | 15.0979208  |
| ENSMUSG000000057335 | 0.169856872  | 6.306278068  | 0.418646649 | 0.517613114 | 0.999071534 | Cep170        | Cep170        | CEP170   | 50.52962415 | 103.0460972 | 68.59930453 | 70.83913079 | 93.39485796 | 80.98428577 | 53.51954771 | 115.3676955 | 66.86192549 | 84.31306421 |
| ENSMUSG00000038650  | -0.165729596 | 8.084423385  | 0.418533737 | 0.517669589 | 0.999071534 | Rnh1          | Rnh1          | RNH1     | 339.6713623 | 344.9494784 | 221.6854856 | 279.6792715 | 305.9531831 | 280.4253705 | 298.5316488 | 252.2200337 | 178.5079844 | 233.6582981 |
| ENSMUSG00000001017  | 0.152214669  | 6.973024668  | 0.41851357  | 0.517679677 | 0.999071534 | Chtop         | Chtop         | CHTOP    | 147.5886105 | 119.1136992 | 112.8960095 | 114.6886221 | 123.8070491 | 161.3864743 | 168.1303325 | 96.30093864 | 82.18281323 | 141.2407223 |
| ENSMUSG000000025171 | -0.150032534 | 4.884850436  | 0.418430731 | 0.517721119 | 0.999071534 | Ubtd1         | Ubtd1         | UBTD1    | 31.93191526 | 33.20242487 | 32.38102598 | 24.07559097 | 39.76475745 | 37.9098615  | 34.7521126  | 24.17885834 | 17.52081009 | 23.13707343 |
| ENSMUSG000000027424 | 0.271711382  | 2.490705157  | 0.418365421 | 0.517753796 | 0.999071534 | Mgme1         | Mgme1         | MGME1    | 6.667103186 | 7.826285862 | 4.241173882 | 2.567137942 | 4.708984435 | 8.731459383 | 8.218842272 | 4.835771668 | 2.514196963 | 5.686229912 |
| ENSMUSG000000097737 | 0.438076163  | 1.055810351  | 0.418137725 | 0.517867749 | 0.999071534 | Gm26530       | Gm26530       |          | 1.052700503 | 0.237160178 | 4.106533441 | 2.150845303 | 0.981038424 | 1.45524323  | 0.970729402 | 3.868617334 | 2.278490998 | 1.960768935 |
| ENSMUSG000000031327 | 0.211376653  | 4.198317679  | 0.417904059 | 0.517984735 | 0.999071534 | Chic1         | Chic1         | CHIC1    | 12.07096577 | 18.0241735  | 14.54116759 | 24.42250151 | 17.98570444 | 16.29872418 | 10.03087049 | 27.21848624 | 20.66355629 | 17.84299731 |
| ENSMUSG000000070780 | -0.270175285 | 2.49631852   | 0.417882449 | 0.517995557 | 0.999071534 | Rbm47         | Rbm47         | RBM47    | 6.035482885 | 7.944865951 | 5.722218729 | 6.521918016 | 4.970594681 | 7.858313444 | 4.659501131 | 6.424668073 | 3.8498641   | 1.764692042 |
| ENSMUSG000000022621 | 0.242319718  | 3.026990979  | 0.41780494  | 0.518034374 | 0.999071534 | Rabl2         | Rabl2         | RABL2B   | 10.8779052  | 6.759065062 | 4.173853661 | 7.423885401 | 9.0255535   | 6.69411886  | 6.730390522 | 7.668152216 | 9.035395336 | 10.91494707 |
| ENSMUSG00000038943  | 0.172046848  | 6.418733993  | 0.417725637 | 0.518074094 | 0.999071534 | Prc1          | Prc1          | PRC1     | 98.18186693 | 70.08083249 | 70.08034938 | 74.30823611 | 105.7559421 | 158.7670364 | 112.1516036 | 52.64082872 | 68.82614187 | 58.69235013 |
| ENSMUSG000000081159 | 0.492258309  | 0.093875851  | 0.417717976 | 0.518077932 | 0.999071534 | Gm6023        | Gm6023        |          | 0.98252047  | 0.474320355 | 1.211763966 | 1.040731598 | 0.327012808 | 0.145524323 | 0.841298815 | 0.967154334 | 1.335667137 | 1.764692042 |
| ENSMUSG000000041936 | -0.148264924 | 6.1410242    | 0.417668232 | 0.51810285  | 0.999071534 | Agrn          | Agrn          | AGRN     | 69.26769311 | 107.0778202 | 77.28361295 | 58.48911582 | 73.44707667 | 82.65781549 | 45.10655956 | 70.53318389 | 56.96227495 | 68.36547687 |
| ENSMUSG000000040188 | -0.153547612 | 4.789060124  | 0.417530157 | 0.518172028 | 0.999071534 | Scamp2        | Scamp2        | SCAMP2   | 26.59823271 | 37.82704833 | 30.83266092 | 25.4632331  | 29.95437321 | 41.0378591  | 26.33912445 | 24.73151796 | 17.6779744  | 19.28089453 |
| ENSMUSG000000090001 | 0.667168897  | -0.486397197 | 0.41751306  | 0.518180595 | 0.999071534 | Gm9719        | Gm9719        |          | 0.350900168 | 0.592900444 | 0.06732022  | 0           | 1.373453794 | 0.291048646 | 1.423736457 | 0.690824524 | 0.864255206 | 0.065358965 |
| ENSMUSG000000002365 | -0.17255299  | 6.991853241  | 0.417471006 | 0.518201668 | 0.999071534 | Snx9          | Snx9          | SNX9     | 159.3086761 | 178.6409038 | 111.6842455 | 97.62062391 | 156.5083299 | 210.7192198 | 134.5430951 | 99.75506126 | 67.09763145 | 88.7574738  |
| ENSMUSG000000090290 | 0.378596839  | 1.617809383  | 0.417428629 | 0.518222905 | 0.999071534 | Gm17296       | Gm17296       | TARBP1   | 4.140621979 | 3.735272798 | 2.221567271 | 1.526406344 | 1.700466601 | 9.459080998 | 2.847472913 | 0.828989429 | 2.671334273 | 1.372538255 |
| ENSMUSG000000060512 | 0.742573314  | -0.617476711 | 0.417344397 | 0.518265122 | 0.999071534 | O610040J01Rik | O610040J01Rik | C4orf19  | 1.052700503 | 0.474320355 | 0.471241542 | 0           | 0           | 1.309718907 | 1.035444696 | 0.138164905 | 0           | 0.849666539 |
| ENSMUSG000000037119 | -0.14499171  | 6.823739474  | 0.417290113 | 0.518292332 | 0.999071534 | D15Ertdd621e  | Fam91a1       | FAM91A1  | 120.1482174 | 142.829717  | 115.1175768 | 116.2844106 | 122.8914132 | 162.623431  | 116.87582   | 92.70865111 | 66.15480759 | 95.09729335 |
| ENSMUSG000000033161 | -0.190461679 | 8.227013043  | 0.417129381 | 0.518372914 | 0.999071534 | Atp1a1        | Atp1a1        | ATP1A1   | 379.8845216 | 381.1756955 | 268.6749994 | 306.5301467 | 323.8080825 | 516.8296333 | 342.1497566 | 189.9076616 | 152.2660536 | 212.4819936 |
| ENSMUSG000000049489 | -0.198610258 | 3.771240661  | 0.417074015 | 0.518400677 | 0.999071534 | Fam58b        | Fam58b        | FAM58A   | 18.10644865 | 8.597056439 | 15.75293156 | 16.44355925 | 16.02362759 | 13.97033501 | 13.52549634 | 8.773471454 | 8.563983406 | 16.53581802 |
| ENSMUSG000000028936 | 0.189651744  | 9.414666797  | 0.416956195 | 0.518459764 | 0.999071534 | Rpl22         | Rpl22         | RPL22    | 680.3954252 | 561.4767205 | 690.7054607 | 822.8717837 | 536.2356025 | 461.8942013 | 842.3342599 | 610.7579616 | 725.7386671 | 779.8631645 |
| ENSMUSG000000003438 | 0.15016765   | 5.578738079  | 0.416876726 | 0.518499626 | 0.999071534 | Timm50        | Timm50        | TIMM50   | 58.31960787 | 37.05627775 | 46.45095204 | 47.04106824 | 45.71639056 | 71.81625342 | 59.99107706 | 28.8764651  | 38.89148427 | 47.05845444 |
| ENSMUSG000000008373 | 0.173815406  | 5.112054847  | 0.416536514 | 0.518670335 | 0.999071534 | Prpf31        | Prpf31        | PRPF31   | 45.47666174 | 29.22999189 | 36.48755943 | 25.11632257 | 32.50507311 | 59.44668596 | 46.33615013 | 18.23776743 | 27.65616659 | 29.60761092 |
| ENSMUSG000000038552 | 0.387682684  | 1.741464572  | 0.416451431 | 0.518713043 | 0.999071534 | Fndc4         | Fndc4         | FNDC4    | 4.280982046 | 4.03172302  | 4.106533441 | 0.624438959 | 1.504258917 | 4.584016176 | 5.306654065 | 4.90485412  | 0.471411931 | 2.941153403 |
| ENSMUSG000000063894 | 0.202288415  | 3.306178031  | 0.416078951 | 0.518900084 | 0.999071534 | Zkscan8       | Zkscan8       | ZKSCAN8  | 8.91286426  | 8.952796705 | 10.23267349 | 7.63203172  | 11.51085084 | 11.71470801 | 7.312828163 | 10.0169556  | 8.563983406 | 12.87571601 |
| ENSMUSG000000043801 | 1.034286843  | -0.395216425 | 0.415996942 | 0.518941281 | 0.999071534 | Oaz1-ps       | Oaz1-ps       |          | 0           | 1.304380977 | 0           | 0           | 0.784830739 | 3.274297269 | 0           | 0           | 0           | 1.30717929  |
| ENSMUSG000000034445 | -0.354911956 | 3.203932718  | 0.415936906 | 0.518971444 | 0.999071534 | Cyb561a3      | Cyb561a3      | CYB561A3 | 16.56248792 | 18.73565403 | 3.702612119 | 4.440454819 | 10.07199449 | 14.77071879 | 16.17882337 | 5.388431287 | 2.357059653 | 2.0261279   |
| ENSMUSG000000047787 | 0.799865858  | -0.51850322  | 0.415870408 | 0.519004856 | 0.999071534 | Flrt1         | Flrt1         | FLRT1    | 1.122880537 | 0.059290044 | 0.403921322 | 0.555056852 | 0.130805123 | 0.218286485 | 0           | 0           | 2.671334273 | 0.261435858 |
| ENSMUSG000000017615 | 0.157308834  | 6.915082074  | 0.41556812  | 0.519156791 | 0.999071534 | Tnfaip1       | Tnfaip1       | TNFAIP1  | 112.4985938 | 117.0978377 | 128.1776995 | 108.8605252 | 125.3767106 | 148.0709987 | 83.80630506 | 110.4628414 | 145.1948746 | 117.842213  |
| ENSMUSG000000032078 | -0.147173471 | 5.41122343   | 0.415351897 | 0.519265517 | 0.999071534 | Zfp259        | Zpr1          | ZPR1     | 63.02167012 | 48.7364165  | 45.50846895 | 33.99723221 | 41.26901637 | 61.26574    | 42.25908664 | 35.71562789 | 24.59198905 | 36.01278944 |
| ENSMUSG000000064289 | 0.165969238  | 4.68699858   | 0.415314778 | 0.519284186 | 0.999071534 | Tank          | Tank          | TANK     | 30.87921476 | 23.77530781 | 22.55227381 | 20.25957511 | 28.45011429 | 33.68888078 | 39.6704749  | 16.78703593 | 19.72073243 | 22.81027861 |
| ENSMUSG000000020238 | 0.147152378  | 7.090077953  | 0.415095176 | 0.519394658 | 0.999071534 | Ncln          | Ncln          | NCLN     | 153.3433733 | 121.7817512 | 120.3012338 | 128.7731898 | 147.2211662 | 195.2936415 | 152.0162244 | 113.0879746 | 109.2104306 | 131.5675955 |
| ENSMUSG000000089651 | 0.423964314  | 0.880712378  | 0.415074145 | 0.51940524  | 0.999071534 | Gm16353       | Gm16353       |          | 0.771980369 | 0.355740266 | 2.827449254 | 2.497755836 | 1.046440986 | 1.236956746 | 0.776583522 | 2.141556024 | 2.121353688 | 2.941153403 |
| ENSMUSG000000009418 | 0.185225125  | 5.79974488   | 0.41866578  | 0.5195097   | 0.999071534 | Nav1          | Nav1          | NAV1     | 40.14297919 | 41.32516095 | 70.4842707  | 63.06833485 | 53.56469795 | 62.06612378 | 25.49782563 | 56.50944606 | 63.71917928 | 73.26739921 |
| ENSMUSG000000090626 | 0.19781559   | 3.549658454  | 0.414845248 | 0.519520437 | 0.999071534 | Tex9          | Tex9          | TEX9     | 10.2462849  | 9.96072746  | 12.79084186 | 13.94580342 | 8.698540692 | 11.86023233 | 11.71346812 | 11.88218181 | 12.41384751 | 11.045665   |
| ENSMUSG000000021589 | 0.141069468  | 5.942788962  | 0.414832084 | 0.519527063 | 0.999071534 | Rhobtb3       | Rhobtb3       | RHOBTB3  | 44.7748614  | 54.90258112 | 66.24309682 | 59.25231899 | 77.8290483  | 88.1149776  | 57.40246532 | 58.23650737 | 55.31233319 | 54.64009433 |

|                     |              |              |             |             |             |               |               |          |             |             |             |             |             |             |             |             |             |             |
|---------------------|--------------|--------------|-------------|-------------|-------------|---------------|---------------|----------|-------------|-------------|-------------|-------------|-------------|-------------|-------------|-------------|-------------|-------------|
| ENSMUSG00000058835  | 0.154651394  | 6.81610687   | 0.414794035 | 0.519546217 | 0.999071534 | Abi1          | Abi1          | ABI1     | 90.25152313 | 94.3897507  | 121.1090764 | 118.7127843 | 127.3387874 | 104.4864639 | 101.6677261 | 141.4808625 | 109.9175485 | 106.1429584 |
| ENSMUSG00000020743  | -0.272145646 | 2.99263573   | 0.414752125 | 0.519567316 | 0.999071534 | Mif4gd        | Mif4gd        | MI4GD    | 12.84294614 | 13.81458035 | 5.92417939  | 4.232308499 | 8.044515076 | 11.27813504 | 9.707294022 | 7.115492597 | 2.514196963 | 5.032640267 |
| ENSMUSG00000026921  | -0.165168701 | 5.223989811  | 0.414728548 | 0.519579186 | 0.999071534 | EgfI7         | EgfI7         | EGFL7    | 50.52962415 | 45.47546406 | 42.00781749 | 28.44666369 | 38.97992671 | 47.95026444 | 48.08346306 | 23.48803381 | 17.12796681 | 38.03891734 |
| ENSMUSG00000042821  | -0.181643536 | 5.561920123  | 0.414630036 | 0.519628788 | 0.999071534 | Snai1         | Snai1         | SNAI1    | 48.77512331 | 77.19563782 | 37.83396383 | 28.51604579 | 69.91533835 | 41.83824288 | 35.14040436 | 65.69741223 | 30.32750087 | 39.60753249 |
| ENSMUSG00000033732  | -0.178607094 | 7.003649659  | 0.414457961 | 0.519715449 | 0.999071534 | Sf3b3         | Sf3b3         | SF3B3    | 160.2911966 | 151.1303232 | 127.9757389 | 119.822898  | 149.5102558 | 250.9566951 | 107.8803942 | 91.32700206 | 56.1765884  | 108.3651631 |
| ENSMUSG00000018809  | 0.200197977  | 3.688836852  | 0.414343477 | 0.51977312  | 0.999071534 | Smyd4         | Smyd4         | SMYD4    | 12.00078574 | 9.249246928 | 16.35881354 | 14.98653501 | 8.698540692 | 14.62519447 | 12.49005164 | 9.740625788 | 11.94243557 | 16.99333077 |
| ENSMUSG00000028101  | -0.155714742 | 4.561325518  | 0.414028078 | 0.51993206  | 0.999071534 | Pias3         | Pias3         | PIAS3    | 23.93139144 | 30.1786326  | 23.42743668 | 25.74076153 | 25.11458365 | 32.37916188 | 17.02012219 | 21.96821986 | 14.29949523 | 23.98673997 |
| ENSMUSG00000064373  | -0.294628971 | 7.726158658  | 0.414008614 | 0.519941871 | 0.999071534 | Sepp1         | Sepp1         | SEPP1    | 360.4446523 | 235.4407663 | 141.776384  | 269.2025734 | 203.0095512 | 314.1142513 | 449.2535673 | 68.39162787 | 57.90509881 | 79.47650084 |
| ENSMUSG00000041620  | -0.706684794 | -0.269909638 | 0.413969456 | 0.519961611 | 0.999071534 | Mmp1b         | Mmp1b         | MMP1     | 0.771980369 | 2.430891821 | 0           | 0.277528426 | 0.981038424 | 0.291048646 | 1.747312924 | 0.138164905 | 0.31427462  | 0           |
| ENSMUSG00000061859  | 0.413493433  | 1.645470659  | 0.41392313  | 0.519984966 | 0.999071534 | Inadl         | Inadl         | PATJ     | 2.245761073 | 0.711480533 | 2.288887492 | 6.868828548 | 0.915635862 | 2.473913492 | 1.035444696 | 5.319348834 | 3.771295445 | 3.464025119 |
| ENSMUSG00000079339  | -0.709782474 | -0.096639571 | 0.413685713 | 0.520104686 | 0.999071534 | Gm14446       | Ift1bI1       | IFIT1B   | 1.122880537 | 1.956571465 | 1.144443746 | 0.416292639 | 0.457817931 | 2.40115133  | 0.906014109 | 0           | 0           | 0           |
| ENSMUSG00000047907  | -0.308148679 | 2.35398893   | 0.413438108 | 0.520229596 | 0.999071534 | Tsh2          | Tsh2          | TSH22    | 3.859901845 | 5.51397413  | 8.751628644 | 6.660682229 | 3.597140888 | 4.001918884 | 1.553167044 | 6.35558562  | 2.357059653 | 7.25484506  |
| ENSMUSG00000044285  | -0.198321904 | 8.158078439  | 0.413353505 | 0.520272287 | 0.999071534 | Gm1821        | Gm1821        |          | 310.6870085 | 398.6069685 | 271.7044093 | 223.6879115 | 388.2950082 | 286.6829164 | 296.4607594 | 394.3226383 | 109.3675679 | 219.7368387 |
| ENSMUSG00000017221  | -0.177693898 | 7.303552641  | 0.413350962 | 0.520273571 | 0.999071534 | Psmd3         | Psmd3         | PSMD3    | 222.8216065 | 167.6722456 | 185.8711284 | 118.0189632 | 180.2494598 | 265.7274139 | 158.552469  | 97.54442278 | 80.53287148 | 144.5740295 |
| ENSMUSG00000036646  | -0.165498099 | 5.870562012  | 0.413325284 | 0.52028653  | 0.999071534 | Man1b1        | Man1b1        | MAN1B1   | 75.30317599 | 81.76097124 | 44.56598587 | 57.72591265 | 61.87082327 | 88.04221544 | 73.96958045 | 39.99873994 | 38.02722907 | 33.3330719  |
| ENSMUSG00000061062  | 0.151493938  | 5.865606891  | 0.413303575 | 0.520297486 | 0.999071534 | Gm10093       | Gm10093       | HDAC1    | 61.82860955 | 55.02116121 | 45.03722741 | 64.17844856 | 59.64713618 | 72.6166372  | 77.78778276 | 35.92287524 | 59.00505998 | 50.19568474 |
| ENSMUSG00000019143  | 0.163457007  | 4.324684649  | 0.413186691 | 0.520356482 | 0.999071534 | Hars2         | Hars2         | HARS2    | 26.87985285 | 20.75151554 | 13.46404407 | 17.76181928 | 18.9013403  | 24.66637276 | 22.8444986  | 19.34308667 | 17.52081009 | 17.51620249 |
| ENSMUSG00000028238  | 0.584253474  | 3.591955671  | 0.413110767 | 0.520394811 | 0.999071534 | Atp6vOd2      | Atp6vOd2      | ATP6VOD2 | 34.7391166  | 3.260952442 | 3.769932339 | 2.983430582 | 5.624620297 | 11.93299449 | 55.00799946 | 2.003391119 | 0.078568655 | 3.006512367 |
| ENSMUSG00000044703  | -0.684811018 | -0.1934817   | 0.412818117 | 0.520542595 | 0.999071534 | Phf11a        | Phf11a        | PHF11    | 1.19306057  | 1.126510844 | 1.683005509 | 0           | 0.719428178 | 1.528005392 | 0.582437641 | 0           | 0           | 0.849666539 |
| ENSMUSG00000024033  | -0.354298146 | 0.888713818  | 0.412758641 | 0.520572639 | 0.999071534 | Rsph1         | Rsph1         | RSPH1    | 1.19306057  | 1.067220799 | 2.894769475 | 2.567137942 | 2.223687094 | 1.091432423 | 1.294305087 | 1.4507315   | 1.414235792 | 1.895409971 |
| ENSMUSG00000018476  | -0.207202471 | 5.264963472  | 0.412746009 | 0.52057902  | 0.999071534 | Kdm6b         | Kdm6b         | KDM6B    | 33.33551593 | 52.59026939 | 50.22088437 | 29.97307003 | 47.80927253 | 29.17762677 | 14.94923279 | 64.17759827 | 28.12757853 | 32.61412329 |
| ENSMUSG00000083111  | -0.909347004 | -0.658962343 | 0.412352989 | 0.520777631 | 0.999071534 | Gm14421       | Gm14421       |          | 1.403600671 | 1.007930755 | 0           | 0           | 0.981038424 | 0           | 0.711868228 | 0           | 0           | 0.915025503 |
| ENSMUSG00000007815  | -0.183108817 | 8.81107322   | 0.412334501 | 0.520786977 | 0.999071534 | Rhoa          | Rhoa          |          | 563.4754893 | 659.601744  | 366.1546784 | 398.9471127 | 500.7874141 | 601.2337407 | 553.704051  | 376.6375305 | 214.8852717 | 346.5332298 |
| ENSMUSG00000025486  | 0.228399632  | 2.83182569   | 0.41232939  | 0.520789561 | 0.999071534 | Sirt3         | Sirt3         | SIRT3    | 4.56170218  | 7.707705773 | 6.462741153 | 6.244389589 | 8.436930446 | 6.475832375 | 8.477703446 | 7.875399573 | 6.364061063 | 6.862691273 |
| ENSMUSG00000074166  | 0.255364585  | 2.46234814   | 0.412325326 | 0.520791615 | 0.999071534 | AW146154      | AW146154      | ZNF788   | 7.368903522 | 4.150303108 | 3.971893    | 4.02416218  | 6.082438228 | 4.147443207 | 6.795105815 | 4.697606763 | 6.049786443 | 5.94766577  |
| ENSMUSG00000020380  | 0.146573145  | 4.742395918  | 0.412238486 | 0.520835519 | 0.999071534 | Rad50         | Rad50         | RAD50    | 26.52805268 | 26.73981003 | 23.09083558 | 24.28373729 | 30.80460651 | 38.85499425 | 24.13880447 | 25.28417758 | 25.61338156 | 22.22204793 |
| ENSMUSG00000030703  | -0.173733741 | 4.976036211  | 0.411922176 | 0.520995494 | 0.999071534 | Gdpd3         | Gdpd3         | GDPD3    | 40.56405939 | 45.89049437 | 22.28299293 | 30.18121635 | 34.07473459 | 22.41074575 | 22.32677625 | 38.82433825 | 21.29210553 | 35.88207151 |
| ENSMUSG00000003970  | -0.178941262 | 10.6276985   | 0.411862645 | 0.521025611 | 0.999071534 | Rpl8          | Rpl8          | RPL8     | 2331.521074 | 1668.59972  | 1656.481342 | 1589.752207 | 1487.908276 | 1796.133957 | 2139.746464 | 1005.35693  | 1026.106636 | 1302.212009 |
| ENSMUSG00000032553  | 0.179399983  | 6.09463295   | 0.411854425 | 0.52102977  | 0.999071534 | Srprb         | Srprb         | SRPRB    | 81.26847884 | 76.12841702 | 49.27840129 | 58.55849793 | 67.88785894 | 95.97329105 | 125.4829541 | 52.57174627 | 38.34150369 | 46.99309548 |
| ENSMUSG00000029416  | -0.172877326 | 4.512915012  | 0.411834309 | 0.521039948 | 0.999071534 | Slc15a4       | Slc15a4       | SLC15A4  | 27.72111325 | 32.3130742  | 17.90717861 | 23.24300569 | 23.93733754 | 30.63287    | 27.56871502 | 20.24115855 | 10.99961171 | 16.60117698 |
| ENSMUSG00000030786  | -0.174469378 | 6.137446083  | 0.411566462 | 0.52111755  | 0.999071534 | Itgam         | Itgam         | ITGAM    | 106.1122107 | 106.2477596 | 59.578395   | 47.80427141 | 69.91533835 | 114.3093558 | 76.29933101 | 53.88431287 | 35.35589479 | 52.02573575 |
| ENSMUSG00000033760  | 0.209091849  | 4.145821521  | 0.411383842 | 0.521267956 | 0.999071534 | Rbm4b         | Rbm4b         | RBM4B    | 10.6673651  | 12.86593964 | 26.65880726 | 16.02726661 | 18.18191212 | 15.28005392 | 11.06631518 | 24.93876531 | 17.28510412 | 20.71879175 |
| ENSMUSG00000078091  | 0.394757327  | 1.114950163  | 0.411314454 | 0.521303093 | 0.999071534 | Gm10912       | Gm10912       |          | 2.035220973 | 1.48225111  | 0.942483085 | 2.983430582 | 1.63506404  | 0.654859454 | 0.970729402 | 1.934308667 | 2.907040239 | 4.182973728 |
| ENSMUSG00000031166  | 0.159617495  | 5.267486455  | 0.41116724  | 0.521377654 | 0.999071534 | Wdr13         | Wdr13         | WDR13    | 34.80929664 | 35.75189678 | 35.34311568 | 44.05763766 | 37.60647292 | 40.67404829 | 22.90921389 | 39.92965748 | 43.99844685 | 44.64017276 |
| ENSMUSG00000086782  | 0.748905406  | -0.556647928 | 0.410913707 | 0.521506108 | 0.999071534 | E130102H24Rik | E130102H24Rik |          | 0           | 1.363671021 | 0           | 0.138764213 | 0.588623054 | 0.509335131 | 0.517722348 | 1.519813953 | 0           | 0.784307574 |
| ENSMUSG00000022450  | 0.176223779  | 7.150168609  | 0.41085495  | 0.521535885 | 0.999071534 | Ndufa6        | Ndufa6        | NDUFA6   | 121.9728983 | 126.9399851 | 144.805794  | 152.5018702 | 143.6894278 | 88.62431273 | 131.6309069 | 183.1375813 | 137.4165778 | 167.1228722 |
| ENSMUSG00000018846  | 0.141824101  | 6.259611059  | 0.410705228 | 0.521611776 | 0.999071534 | Pank3         | Pank3         | PANK3    | 64.63581089 | 65.98981943 | 84.95811807 | 79.85880464 | 81.29538406 | 96.11881537 | 81.99427684 | 74.81629594 | 77.07585065 | 56.40478637 |
| ENSMUSG00000026874  | -0.524219124 | 0.161007988  | 0.410600097 | 0.521665077 | 0.999071534 | Hc            | Hc            | C5       | 1.403600671 | 1.245090933 | 2.221567271 | 0.555056852 | 0.588623054 | 0.800383777 | 0.258861174 | 1.588896405 | 0           | 1.30717929  |
| ENSMUSG000000339981 | -0.392896009 | 1.393011357  | 0.410384811 | 0.521774255 | 0.999071534 | Zc3h12d       | Zc3h12d       | ZC3H12D  | 2.737021308 | 4.03172302  | 1.817645949 | 1.248877918 | 4.970594681 | 6.985167506 | 0.906014109 | 1.519813953 | 1.099961171 | 0.849666539 |

|                     |              |              |             |             |             |               |               |          |             |             |             |             |             |             |             |             |             |             |
|---------------------|--------------|--------------|-------------|-------------|-------------|---------------|---------------|----------|-------------|-------------|-------------|-------------|-------------|-------------|-------------|-------------|-------------|-------------|
| ENSMUSG00000043487  | -0.533811073 | -0.362573631 | 0.410296138 | 0.521819236 | 0.999071534 | Acot6         | Acot6         | ACOT6    | 0.912340436 | 0.474320355 | 0.605881983 | 0.832585279 | 1.111843547 | 0.582097292 | 0.19414588  | 0.759906976 | 0           | 1.045743432 |
| ENSMUSG00000092626  | 0.662151016  | -0.355940339 | 0.410044271 | 0.521947036 | 0.999071534 | 9130230N09Rik | 9130230N09Rik |          | 0.350900168 | 0.711480533 | 0.471241542 | 0           | 1.177246109 | 0           | 0.582437641 | 0.414494714 | 1.885647722 | 0.653589645 |
| ENSMUSG000000067148 | 0.162977066  | 5.832961283  | 0.409763572 | 0.522089531 | 0.999071534 | Polr1c        | Polr1c        | POLR1C   | 72.14507448 | 65.51549907 | 49.27840129 | 39.40903652 | 53.76090563 | 66.21356699 | 98.3025308  | 45.11084141 | 34.88448286 | 50.13032578 |
| ENSMUSG000000046280 | 0.290541337  | 2.277941831  | 0.409735378 | 0.522103848 | 0.999071534 | She           | She           | SHE      | 5.474042616 | 7.174095373 | 2.558168373 | 2.750902155 | 4.251166504 | 8.222124252 | 4.918362304 | 5.872008453 | 1.492804447 | 5.620870947 |
| ENSMUSG00000022303  | 0.508360607  | 2.705313579  | 0.409355333 | 0.522296894 | 0.999071534 | Dcstamp       | Dcstamp       | DCSTAMP  | 15.29924731 | 3.972432975 | 4.914376085 | 1.318260024 | 2.223687094 | 10.11394045 | 23.03864448 | 2.348803381 | 0.078568655 | 2.745076509 |
| ENSMUSG00000005493  | -0.407475993 | 0.75992021   | 0.409285336 | 0.522332464 | 0.999071534 | Msh4          | Msh4          | MSH4     | 1.333420637 | 1.778701332 | 2.086926831 | 2.22022741  | 1.765869163 | 0.509335131 | 0.323576467 | 2.141556024 | 1.021392516 | 2.287563758 |
| ENSMUSG000000044408 | 0.198166891  | 7.244606226  | 0.408919724 | 0.522518321 | 0.999071534 | Sptssa        | Sptssa        | SPTSSA   | 191.5914916 | 126.6435349 | 121.1090764 | 164.9212673 | 127.0771772 | 143.8507933 | 290.5716677 | 93.95213526 | 135.3737927 | 114.6396237 |
| ENSMUSG000000082095 | -0.384843776 | 0.833278817  | 0.408865427 | 0.522545932 | 0.999071534 | Gm11991       | Gm11991       |          | 1.684320805 | 2.54947191  | 2.288887492 | 1.80393477  | 1.308051232 | 3.419821592 | 1.29430587  | 0.414494714 | 0.471411931 | 1.764692042 |
| ENSMUSG000000041870 | -0.141836594 | 5.288811268  | 0.408844783 | 0.522556431 | 0.999071534 | Ankrd13a      | Ankrd13a      | ANKRD13A | 69.05715301 | 56.79986254 | 66.71433836 | 47.52674299 | 69.98074091 | 89.42469651 | 45.36542073 | 52.22633401 | 31.03461876 | 51.24142817 |
| ENSMUSG00000020889  | 0.346626919  | 4.484638958  | 0.408842856 | 0.522557411 | 0.999071534 | Nr1d1         | Nr1d1         | NR1D1    | 7.228543455 | 42.68883197 | 16.42613376 | 15.47220976 | 20.14398897 | 11.86023233 | 4.335924663 | 64.45392808 | 13.67094599 | 23.26779136 |
| ENSMUSG000000002835 | 0.246523492  | 4.961049451  | 0.408678013 | 0.522641257 | 0.999071534 | Chaf1a        | Chaf1a        | CHAF1A   | 48.28386308 | 25.85045936 | 31.775144   | 18.0393477  | 24.32975291 | 92.18965865 | 33.84609849 | 12.36575898 | 16.89226085 | 20.98022761 |
| ENSMUSG000000057863 | 0.209211     | 9.653830279  | 0.40849951  | 0.522732079 | 0.999071534 | RpB6          | RpB6          | RPL36    | 858.7930705 | 522.2267111 | 931.3079282 | 962.7461105 | 579.9899162 | 492.3087849 | 706.4968589 | 838.8682194 | 1044.727407 | 916.8555541 |
| ENSMUSG000000039068 | 0.1309297    | 5.975391632  | 0.408295862 | 0.522835728 | 0.999071534 | Zzz3          | Zzz3          | ZZZ3     | 60.42500888 | 68.24284111 | 62.94440602 | 60.57057902 | 58.86230544 | 97.21024779 | 54.68442299 | 58.78916699 | 48.94827213 | 63.39819557 |
| ENSMUSG000000072492 | 0.567305319  | -0.081798774 | 0.40821658  | 0.52287609  | 0.999071534 | Gm10364       | Gm10364       |          | 0.350900168 | 0.118580089 | 0.538561763 | 1.665170557 | 0.719428178 | 0.145524323 | 0.258861174 | 1.519813953 | 1.649941757 | 0.849666539 |
| ENSMUSG000000018820 | -0.165852007 | 4.234826628  | 0.408054555 | 0.522958591 | 0.999071534 | Zfyve27       | Zfyve27       | ZFYVE27  | 24.49283171 | 23.53814763 | 21.07122897 | 12.90507182 | 21.25583252 | 23.35665385 | 17.53784453 | 16.09621141 | 10.76390575 | 19.01945867 |
| ENSMUSG000000071644 | -0.167559602 | 9.404302815  | 0.408028597 | 0.522971811 | 0.999071534 | Eef1g         | Eef1g         | EEF1G    | 873.9519577 | 788.9133309 | 732.9825591 | 623.3982273 | 711.2528574 | 851.8266249 | 839.2279258 | 483.0245071 | 400.2287291 | 574.570657  |
| ENSMUSG000000081952 | 0.707065506  | -0.454630921 | 0.407768166 | 0.523104475 | 0.999071534 | Gm12178       | Gm12178       |          | 0.771980369 | 0.889350666 | 0           | 0           | 0.719428178 | 0.873145938 | 1.229590576 | 1.036236786 | 0.471411931 | 0           |
| ENSMUSG000000058922 | -1.265849812 | 5.032977599  | 0.407744722 | 0.523116421 | 0.999071534 | Gm10052       | Gm10052       |          | 112.7793139 | 130.853128  | 0           | 0           | 0           | 96.6281505  | 14.56094103 | 0           | 0           | 0           |
| ENSMUSG000000079414 | -0.348262693 | 1.011252927  | 0.407643323 | 0.523168092 | 0.999071534 | Gm11110       | Gm11110       |          | 2.456301174 | 2.312311732 | 1.144443746 | 2.22022741  | 2.812310149 | 1.018670261 | 2.135604685 | 2.348803381 | 0.628549241 | 1.830051006 |
| ENSMUSG000000069844 | 0.197523098  | 3.558779502  | 0.407398372 | 0.523292952 | 0.999071534 | Sco1          | Sco1          | SCO1     | 10.6673651  | 11.20581839 | 10.9058757  | 8.117706466 | 15.76201734 | 17.0263458  | 15.1919622  | 8.566224097 | 8.01400282  | 11.89533154 |
| ENSMUSG000000074925 | 0.402545331  | 1.120748733  | 0.407212364 | 0.523387801 | 0.999071534 | Ptar1         | Ptar1         | PTAR1    | 2.737021308 | 2.786632087 | 1.279084186 | 0.20814632  | 2.223687094 | 3.274297269 | 2.006174098 | 3.315957715 | 0.471411931 | 2.548999616 |
| ENSMUSG000000050708 | -0.185942    | 11.43455262  | 0.407079487 | 0.523455577 | 0.999071534 | Ftl1          | Ftl1          | FTL      | 2637.997281 | 3843.654999 | 2457.928565 | 2786.801692 | 3596.42146  | 2073.357793 | 2194.948609 | 3739.847643 | 1617.807177 | 2820.435395 |
| ENSMUSG000000024667 | -0.238464094 | 2.984467217  | 0.406913381 | 0.523540324 | 0.999071534 | Tmem216       | Tmem216       | TMEM216  | 12.63240604 | 10.49433786 | 6.732022034 | 5.064893778 | 9.156358623 | 7.64002696  | 9.254286968 | 6.079255811 | 3.378452169 | 8.692742279 |
| ENSMUSG000000021876 | 0.181448372  | 7.248624658  | 0.406722893 | 0.523637539 | 0.999071534 | Rnase4        | Rnase4        | RNASE4   | 127.3065808 | 163.4033624 | 128.6489411 | 162.2847472 | 156.1813171 | 109.0704801 | 213.3016073 | 218.7841267 | 110.2318231 | 119.737623  |
| ENSMUSG000000030050 | -0.484539809 | 0.455562717  | 0.40664142  | 0.523679129 | 0.999071534 | Gkn1          | Gkn1          | GKN1     | 0.210540101 | 2.490181865 | 1.548365068 | 2.428373729 | 0.719428178 | 0.218286485 | 0.970729402 | 1.657978857 | 1.335667137 | 0.522871716 |
| ENSMUSG000000063849 | 0.184229145  | 3.846450894  | 0.406462985 | 0.523770236 | 0.999071534 | Ppcdc         | Ppcdc         | PPCDC    | 20.84346996 | 11.91729893 | 11.84835878 | 12.76630761 | 12.03407133 | 15.20729176 | 12.29590576 | 14.507315   | 13.8280833  | 16.79725388 |
| ENSMUSG000000023947 | 0.167024929  | 4.7190944    | 0.406063688 | 0.523974214 | 0.999071534 | Nfkbie        | Nfkbie        | NFKBIE   | 37.47613791 | 22.41163679 | 22.08103227 | 15.74973819 | 31.52403469 | 41.91100504 | 25.49782563 | 21.83005496 | 23.72773384 | 23.00635551 |
| ENSMUSG000000029436 | -0.530446256 | 0.153418966  | 0.405975486 | 0.52401929  | 0.999071534 | Mmp17         | Mmp17         | MMP17    | 0.771980369 | 1.600831199 | 1.750325729 | 1.387642131 | 0.39241537  | 1.309718907 | 1.229590576 | 0.138164905 | 0           | 1.372538255 |
| ENSMUSG000000073155 | -0.17213141  | 6.130621643  | 0.405948626 | 0.524033019 | 0.999071534 | 1810058I24Rik | 1810058I24Rik |          | 59.16176828 | 60.83158556 | 86.30452248 | 105.460802  | 69.71913066 | 52.46151846 | 42.51794782 | 77.85592385 | 63.48347332 | 74.5745785  |
| ENSMUSG000000026585 | 0.145486227  | 5.392171125  | 0.405740303 | 0.524139516 | 0.999071534 | Klfap3        | Klfap3        | KIFAP3   | 30.66867466 | 48.85499659 | 41.26729507 | 37.67448386 | 48.00548021 | 40.81957261 | 40.64120431 | 49.73936572 | 41.87709317 | 36.2742253  |
| ENSMUSG000000028923 | -0.13852335  | 5.683676412  | 0.40522614  | 0.524402528 | 0.999071534 | Necap2        | Necap2        | NECAP2   | 69.33787314 | 62.43241676 | 52.37513143 | 41.97617446 | 54.02251588 | 68.68748048 | 58.11433354 | 44.00552217 | 32.29171725 | 37.58140459 |
| ENSMUSG000000078429 | -0.190547513 | 7.789375853  | 0.405194509 | 0.524418716 | 0.999071534 | Ctdsp2        | Ctdsp2        | CTDSP2   | 201.0657961 | 293.5450099 | 211.9240536 | 222.6471799 | 296.4044092 | 202.7881442 | 106.5213731 | 307.0715009 | 151.0089551 | 225.6845044 |
| ENSMUSG000000009630 | -0.143942841 | 6.949069509  | 0.40510622  | 0.524463904 | 0.999071534 | Ppp2cb        | Ppp2cb        | PPP2CB   | 146.1148298 | 125.6356041 | 137.804491  | 128.4262792 | 134.9908871 | 171.8642255 | 126.5183988 | 88.77095133 | 76.60443872 | 116.6657516 |
| ENSMUSG000000032419 | -0.213290432 | 4.153917619  | 0.405007372 | 0.524514506 | 0.999071534 | Tbx18         | Tbx18         | TBX18    | 12.28150587 | 18.49849386 | 19.45554368 | 30.45874478 | 16.67765321 | 17.60844309 | 7.571689337 | 21.20831288 | 16.34228026 | 15.29399769 |
| ENSMUSG000000020102 | 0.441912494  | 0.95776569   | 0.404774952 | 0.524633519 | 0.999071534 | Slc16a7       | Slc16a7       | SLC16A7  | 1.684320805 | 2.01586151  | 1.211763966 | 0.485674746 | 2.616102464 | 3.056010784 | 5.500799946 | 0.621742072 | 0.31427462  | 1.045743432 |
| ENSMUSG000000032434 | -0.146528398 | 5.777987973  | 0.404703485 | 0.524670124 | 0.999071534 | Cmtm6         | Cmtm6         | CMTM6    | 68.77643287 | 61.83951632 | 62.13656338 | 58.07282318 | 47.54766228 | 77.70998851 | 51.06036656 | 39.65332767 | 50.99105716 | 33.72522568 |
| ENSMUSG000000010097 | 0.158466283  | 7.069630586  | 0.404510923 | 0.524768775 | 0.999071534 | Nxf1          | Nxf1          | NXF1     | 125.8328001 | 106.3663397 | 160.693366  | 131.1321814 | 133.4866282 | 135.7741934 | 101.3441496 | 149.9089217 | 140.7164613 | 145.3583371 |
| ENSMUSG000000024507 | -0.158515036 | 5.472896436  | 0.404345589 | 0.524853504 | 0.999071534 | Hsd17b4       | Hsd17b4       | HSD17B4  | 48.63476324 | 54.84239108 | 44.76794653 | 41.83741025 | 52.97607489 | 78.72865877 | 39.41161373 | 23.76436362 | 33.941659   | 33.07163604 |
| ENSMUSG000000044595 | 0.39170898   | 0.631422199  | 0.404330368 | 0.524861306 | 0.999071534 | Dnd1          | Dnd1          | DND1     | 0.561440268 | 0.889350666 | 2.086926831 | 1.80393477  | 0.981038424 | 0.873145938 | 1.671882337 | 1.72706131  | 2.042785033 | 1.241820326 |

|                    |              |              |             |             |             |          |          |          |             |             |             |             |             |             |             |             |             |             |
|--------------------|--------------|--------------|-------------|-------------|-------------|----------|----------|----------|-------------|-------------|-------------|-------------|-------------|-------------|-------------|-------------|-------------|-------------|
| ENSMUSG00000028919 | -0.181098255 | 4.400073787  | 0.404329192 | 0.524861909 | 0.999071534 | Arhgef19 | Arhgef19 | ARHGEF19 | 28.14219345 | 27.5105806  | 16.5607742  | 17.27614453 | 26.88045282 | 16.80805931 | 12.74891282 | 27.08032134 | 15.32088774 | 22.02597104 |
| ENSMUSG00000047714 | 0.165384802  | 7.541455972  | 0.40428471  | 0.524884709 | 0.999071534 | Ppp1r2   | Ppp1r2   | PPP1R2P3 | 161.6246172 | 152.0196739 | 202.566543  | 221.1207736 | 169.0656217 | 189.5454308 | 222.6853249 | 184.8646426 | 189.2718901 | 152.7439    |
| ENSMUSG00000024871 | 0.362943427  | 2.355628511  | 0.404129238 | 0.524964415 | 0.999071534 | Doc2g    | Doc2g    |          | 3.36864161  | 1.660121243 | 8.616988204 | 5.689332737 | 3.139322957 | 2.40115133  | 1.359021163 | 5.457513739 | 6.442629718 | 10.32671639 |
| ENSMUSG00000033436 | 0.250790033  | 2.846868082  | 0.403862767 | 0.525101076 | 0.999071534 | Armccx2  | Armccx2  | ARMCCX2  | 7.789983723 | 6.521904885 | 7.337904017 | 6.03624327  | 5.820827982 | 12.07851881 | 11.00159989 | 2.901463001 | 6.049786443 | 5.94766577  |
| ENSMUSG00000073403 | -0.328309386 | 2.611618692  | 0.403737727 | 0.525165225 | 0.999071534 | Gm10499  | Gm10499  |          | 10.52700503 | 12.98451973 | 2.423527932 | 2.358991623 | 6.671061283 | 11.49642152 | 6.665675228 | 3.17779281  | 2.828471584 | 2.875794438 |
| ENSMUSG00000043889 | -0.561789155 | 1.326029339  | 0.40370021  | 0.525184475 | 0.999071534 | Gm8399   | Gm8399   |          | 2.737021308 | 7.411255551 | 0.673202203 | 0.971349492 | 2.943115272 | 5.675448599 | 3.235764674 | 1.243484143 | 0           | 0.065358965 |
| ENSMUSG00000050192 | 0.228979601  | 3.049000508  | 0.403380498 | 0.525348571 | 0.999071534 | Elf5a2   | Elf5a2   | EIF5A2   | 7.228543455 | 7.826285862 | 8.616988204 | 4.717983245 | 10.79142266 | 12.80614043 | 11.13103048 | 5.112101477 | 5.499805857 | 9.019537102 |
| ENSMUSG00000035165 | -0.204183901 | 4.370701568  | 0.403211868 | 0.525435159 | 0.999071534 | Kcne3    | Kcne3    | KCNE3    | 30.73885469 | 23.77530781 | 28.4764532  | 13.32136446 | 18.57432749 | 9.822891806 | 28.02172208 | 16.78703593 | 14.53520119 | 21.43774036 |
| ENSMUSG00000023156 | 0.170067981  | 4.884769315  | 0.402908286 | 0.525591106 | 0.999071534 | Rpp14    | Rpp14    | RPP14    | 34.80929664 | 25.55400914 | 26.59148704 | 28.03037105 | 28.84252966 | 33.76164295 | 50.67207479 | 18.09960253 | 18.69933991 | 31.37230296 |
| ENSMUSG00000048486 | 0.222688193  | 3.125491858  | 0.402772324 | 0.525660975 | 0.999071534 | Fitm2    | Fitm2    | FITM2    | 9.333944461 | 7.351965506 | 11.78103856 | 4.995511672 | 7.913709953 | 15.20729176 | 8.801279913 | 8.911636359 | 5.342668547 | 7.908434705 |
| ENSMUSG00000091277 | 0.743994871  | 1.698939193  | 0.402731963 | 0.525681719 | 0.999071534 | Gm1818   | Gm1818   | TFB2M    | 1.824680872 | 2.786632087 | 5.587578288 | 0           | 2.223687094 | 1.309718907 | 1.941458804 | 0           | 13.04239675 | 0           |
| ENSMUSG00000027347 | -0.314394015 | 1.948586959  | 0.402613895 | 0.525742411 | 0.999071534 | Rasgrp1  | Rasgrp1  | RASGRP1  | 5.123142449 | 2.134441599 | 6.799342255 | 2.636520049 | 4.839789558 | 6.766881022 | 3.753487022 | 1.381649048 | 1.649941757 | 3.33330719  |
| ENSMUSG00000035293 | 0.156126846  | 5.065242998  | 0.402359346 | 0.525873301 | 0.999071534 | G2e3     | G2e3     | G2E3     | 25.68589228 | 29.94147243 | 34.93919436 | 35.03796381 | 37.8026806  | 35.87174563 | 43.55339251 | 35.23205072 | 32.84169783 | 20.84950968 |
| ENSMUSG00000039519 | 0.550334235  | 0.824438194  | 0.402187587 | 0.525961653 | 0.999071534 | Cyp7b1   | Cyp7b1   | CYP7B1   | 1.754500839 | 0.415030311 | 1.548365068 | 2.289609516 | 0.784830739 | 2.182864846 | 6.471529348 | 0           | 0.549980586 | 0.522871716 |
| ENSMUSG00000024511 | 0.1855532    | 3.894666389  | 0.402143514 | 0.525984328 | 0.999071534 | Rab27b   | Rab27b   | RAB27B   | 9.544484562 | 16.71979252 | 14.81044848 | 12.97445392 | 17.59328907 | 13.02442691 | 14.04321869 | 19.48125158 | 12.09957289 | 16.40510009 |
| ENSMUSG00000073725 | 0.148027188  | 5.836017512  | 0.402045399 | 0.526034814 | 0.999071534 | Lmbrd1   | Lmbrd1   | LMBRD1   | 55.09132633 | 60.00152494 | 50.55748548 | 58.90540846 | 55.78838504 | 42.34757801 | 51.44865832 | 77.99408875 | 49.73395868 | 62.613888   |
| ENSMUSG00000026596 | 0.141837777  | 5.327453382  | 0.401765572 | 0.526178848 | 0.999071534 | Abi2     | Abi2     | ABL2     | 44.70468137 | 43.93392291 | 38.97840758 | 26.78149313 | 44.2775342  | 55.88134005 | 34.6873973  | 50.43019025 | 27.73473525 | 37.1892508  |
| ENSMUSG00000030616 | -0.246269109 | 2.834715185  | 0.401640172 | 0.526243417 | 0.999071534 | Syt12    | Syt12    | SYTL2    | 6.877643287 | 12.62877946 | 8.347707322 | 4.02416218  | 7.78290483  | 8.658697221 | 5.694945826 | 3.730452429 | 6.206923753 | 6.797332309 |
| ENSMUSG00000074336 | 0.385743525  | 1.301364948  | 0.401474297 | 0.526328849 | 0.999071534 | Apoc4    | Apoc4    | APOC4    | 0.701800335 | 1.541541155 | 2.490848153 | 3.746633754 | 1.896674286 | 0.9459081   | 1.100159989 | 2.832380548 | 3.78452169  | 3.92153787  |
| ENSMUSG00000024856 | -0.136888325 | 5.524731772  | 0.401422925 | 0.526355312 | 0.999071534 | Cdk2ap2  | Cdk2ap2  | CDK2AP2  | 43.932701   | 42.74812202 | 52.77905275 | 42.60061342 | 68.21487174 | 48.0230266  | 40.51177372 | 44.8345116  | 30.72034414 | 48.30027477 |
| ENSMUSG00000035334 | -0.164696088 | 5.465044699  | 0.401418981 | 0.526357344 | 0.999071534 | Ddr1     | Ddr1     | DDR1     | 35.93217717 | 56.62199241 | 38.64180648 | 42.32308499 | 68.86889736 | 43.29348611 | 32.68122321 | 59.89448623 | 24.12057712 | 41.89509625 |
| ENSMUSG00000033491 | 0.513912086  | -0.245252857 | 0.401322154 | 0.526407231 | 0.999071534 | Prss35   | Prss35   | PRSS35   | 0.350900168 | 0.237160178 | 0.269280881 | 1.248877918 | 0.915635862 | 0.582097292 | 0.970729402 | 1.4507315   | 0.785686551 | 0.196076894 |
| ENSMUSG00000048234 | -0.235721863 | 6.049945464  | 0.401263879 | 0.526437258 | 0.999071534 | Rnf149   | Rnf149   | RNF149   | 100.7785282 | 118.1057685 | 56.81826597 | 41.83741025 | 56.57321578 | 98.08339373 | 110.2101448 | 43.03836784 | 16.26371161 | 41.04542971 |
| ENSMUSG00000025140 | 0.283895301  | 1.658483503  | 0.400883457 | 0.526633355 | 0.999071534 | Pycr1    | Pycr1    | PYCR1    | 2.666841275 | 2.01586151  | 2.894769475 | 2.497755836 | 4.120361381 | 3.638108076 | 3.300479967 | 4.006782239 | 1.807079067 | 3.464025119 |
| ENSMUSG00000001229 | 0.130983363  | 5.612333256  | 0.400778847 | 0.526687302 | 0.999071534 | Dpp9     | Dpp9     | DPP9     | 49.05584345 | 45.5347541  | 51.02872702 | 43.57196291 | 52.91067233 | 74.72673988 | 38.37616903 | 43.93643972 | 39.12719024 | 54.44401743 |
| ENSMUSG00000037344 | -0.19316889  | 4.213835376  | 0.400762812 | 0.526695572 | 0.999071534 | Slc12a9  | Slc12a9  | SLC12A9  | 25.40517214 | 19.0913943  | 14.60848781 | 23.38176991 | 19.42456079 | 23.0656052  | 16.63183042 | 23.83344608 | 6.285492408 | 15.62079252 |
| ENSMUSG00000026641 | 0.147795813  | 6.063560245  | 0.400525305 | 0.526818092 | 0.999071534 | Usf1     | Usf1     | USF1     | 60.00392868 | 64.27040814 | 67.8587821  | 61.75007483 | 75.08214071 | 49.9148428  | 63.93870996 | 87.45838473 | 55.70517646 | 76.6007064  |
| ENSMUSG00000030528 | 0.221399461  | 3.599564512  | 0.400374696 | 0.526895811 | 0.999071534 | Blm      | Blm      | BLM      | 11.79024564 | 9.308536972 | 11.44443746 | 9.991023343 | 15.10799173 | 22.1196971  | 18.76743511 | 5.664761096 | 9.349669957 | 8.496665386 |
| ENSMUSG00000001053 | -0.222486277 | 3.944058655  | 0.400362026 | 0.526902351 | 0.999071534 | N4bp3    | N4bp3    | N4BP3    | 25.40517214 | 20.21790514 | 14.67580803 | 11.17051915 | 14.38856355 | 29.25038893 | 17.92613629 | 9.395213526 | 5.971217787 | 9.542408818 |
| ENSMUSG00000039201 | 0.195456962  | 3.49520016   | 0.400318628 | 0.52692475  | 0.999071534 | Tbc1d25  | Tbc1d25  | TBC1D25  | 11.36916543 | 9.604987194 | 9.694111729 | 10.26855177 | 13.08051232 | 13.2427134  | 7.959981098 | 14.43823255 | 8.406846095 | 13.66002358 |
| ENSMUSG00000049832 | -0.181625438 | 4.914156933  | 0.40028699  | 0.52694108  | 0.999071534 | Gm9840   | Gm9840   |          | 45.1959416  | 25.4947191  | 31.57318334 | 37.32757332 | 25.70320671 | 34.85307537 | 45.17127485 | 24.17885834 | 12.17814154 | 23.13707343 |
| ENSMUSG00000083337 | 0.433341865  | 0.129382718  | 0.400186301 | 0.526993059 | 0.999071534 | Gm11539  | Gm11539  |          | 0.701800335 | 0.652190488 | 1.009803305 | 0.693821065 | 1.177246109 | 1.164194584 | 1.035444696 | 0.483577167 | 0.392843275 | 2.352922722 |
| ENSMUSG00000058440 | 0.142884788  | 4.845933256  | 0.400144025 | 0.527014886 | 0.999071534 | Nrf1     | Nrf1     | NRF1     | 35.37073691 | 28.81496158 | 25.78364439 | 21.2309246  | 30.73920395 | 42.27481584 | 30.54561852 | 24.17885834 | 23.72773384 | 26.53573959 |
| ENSMUSG00000022557 | 0.241226265  | 5.645944523  | 0.399822129 | 0.527181131 | 0.999071534 | Bop1     | Bop1     | BOP1     | 82.18081928 | 48.55854637 | 36.89148075 | 23.79806255 | 48.72490839 | 114.9642152 | 82.57671448 | 17.54694291 | 26.32049946 | 36.33958426 |
| ENSMUSG00000034345 | 0.158871695  | 6.631065467  | 0.399787252 | 0.527199149 | 0.999071534 | Gtf2h5   | Gtf2h5   | GTTF2H5  | 106.3227508 | 68.3614212  | 101.7881732 | 120.8636296 | 85.80816081 | 90.51612893 | 141.7264927 | 81.10279911 | 90.74679664 | 95.55480611 |
| ENSMUSG00000026965 | -0.135463267 | 6.433623366  | 0.399753212 | 0.527216736 | 0.999071534 | Anapc2   | Anapc2   | ANAPC2   | 99.93636776 | 95.21981132 | 90.0071346  | 85.89504791 | 98.62706289 | 93.64490188 | 59.60278529 | 90.8434249  | 62.77635542 | 91.6986272  |
| ENSMUSG00000002748 | 0.141843824  | 6.997614754  | 0.399668173 | 0.527260676 | 0.999071534 | Baz1b    | Baz1b    | BAZ1B    | 129.692702  | 136.129942  | 113.4345713 | 111.0113705 | 141.3349356 | 189.3999064 | 114.8049306 | 114.4005412 | 111.2532156 | 125.0316991 |
| ENSMUSG00000023944 | -0.160257165 | 11.08656949  | 0.399614013 | 0.527288664 | 0.999071534 | Hsp90ab1 | Hsp90ab1 | HSP90AB1 | 2412.368473 | 2440.496808 | 2414.776304 | 2043.858095 | 2629.967807 | 3008.497092 | 1981.129279 | 1498.191145 | 1638.863577 | 1964.036883 |
| ENSMUSG00000035559 | -0.19527368  | 4.562606162  | 0.39945589  | 0.527370392 | 0.999071534 | Mpv17l2  | Mpv17l2  | MPV17L2  | 36.28307734 | 20.92938568 | 21.74443117 | 28.30789947 | 22.89089656 | 34.12545375 | 33.06951497 | 10.56961522 | 11.86386692 | 19.99984314 |

|                     |              |              |             |             |             |               |               |          |             |             |             |             |             |             |             |             |             |             |
|---------------------|--------------|--------------|-------------|-------------|-------------|---------------|---------------|----------|-------------|-------------|-------------|-------------|-------------|-------------|-------------|-------------|-------------|-------------|
| ENSMUSG00000084111  | -0.360084021 | 1.784112099  | 0.399393427 | 0.527402683 | 0.999071534 | Gm15710       | Gm15710       |          | 2.17558104  | 5.573264174 | 6.395420932 | 3.052812688 | 2.092881971 | 1.164194584 | 2.265035272 | 1.4507315   | 5.342668547 | 2.810435474 |
| ENSMUSG00000002204  | -0.219854376 | 3.345294821  | 0.399242171 | 0.527480891 | 0.999071534 | Napsa         | Napsa         | NAPSA    | 18.80824899 | 7.766995817 | 10.03071283 | 9.782877023 | 9.810384239 | 12.2968053  | 7.506974044 | 6.562832977 | 10.52819978 | 7.646998847 |
| ENSMUSG00000026648  | -0.222915328 | 3.190614282  | 0.399104968 | 0.527551851 | 0.999071534 | Dclre1c       | Dclre1c       | DCLRE1C  | 12.84294614 | 12.74735955 | 6.260780492 | 9.64411281  | 8.894748377 | 9.822891806 | 8.542418739 | 8.289894287 | 3.69272679  | 10.58815225 |
| ENSMUSG00000032776  | -0.461096559 | 0.724617724  | 0.398738147 | 0.527741651 | 0.999071534 | Mctp2         | Mctp2         | MCTP2    | 3.228281543 | 1.956571465 | 0.471241542 | 2.01208109  | 1.438856355 | 1.091432423 | 1.68259763  | 1.174401691 | 0           | 2.352922722 |
| ENSMUSG00000074419  | 0.710181185  | -0.390139358 | 0.398595917 | 0.527815276 | 0.999071534 | Gm15448       | Gm15448       | LILRA4   | 0.280720134 | 1.363671021 | 0.471241542 | 0           | 0.327012808 | 2.692199976 | 1.164875283 | 0.069082452 | 0.235705965 | 0           |
| ENSMUSG00000048965  | -0.240131746 | 2.389585536  | 0.398485004 | 0.527872703 | 0.999071534 | Mrgpre        | Mrgpre        | MRGPRE   | 5.684582717 | 6.521904885 | 5.654898509 | 5.411804311 | 5.428412612 | 5.23887563  | 5.694945826 | 5.457513739 | 3.378452169 | 2.941153403 |
| ENSMUSG00000030374  | 0.139804731  | 5.548088345  | 0.398189961 | 0.52802552  | 0.999071534 | Strn4         | Strn4         | STRN4    | 45.75738187 | 49.38860699 | 47.46075534 | 35.31549223 | 53.43389282 | 77.41893986 | 33.97552908 | 50.70652006 | 36.69156193 | 42.54868589 |
| ENSMUSG00000046897  | -0.157496447 | 6.026226712  | 0.398058172 | 0.528093805 | 0.999071534 | Zfp740        | Zfp740        | ZNF740   | 82.32117934 | 99.48869452 | 53.18297407 | 47.73488931 | 75.67076377 | 96.91919915 | 46.01257366 | 64.8684228  | 36.69156193 | 61.17599078 |
| ENSMUSG00000023921  | 0.159824819  | 4.281568123  | 0.39788924  | 0.528181359 | 0.999071534 | Mut           | Mut           | MUT      | 18.59770889 | 21.93731643 | 17.90717861 | 19.01069719 | 17.2008737  | 24.08427546 | 25.43311034 | 13.40199576 | 15.3994564  | 21.04558657 |
| ENSMUSG000000098176 | 0.436206079  | 0.498663234  | 0.397873362 | 0.52818959  | 0.999071534 | Ccdc166       | Ccdc166       | CCDC166  | 1.614140771 | 0.059290044 | 0.740522424 | 1.248877918 | 2.027479409 | 1.528005392 | 1.423736457 | 1.4507315   | 1.492804447 | 1.176461361 |
| ENSMUSG00000053565  | -0.145585887 | 7.132803232  | 0.397738169 | 0.528259678 | 0.999071534 | Elf3k         | Elf3k         | EIF3K    | 179.941606  | 147.3357604 | 173.2659293 | 152.0161954 | 148.2022046 | 140.7220204 | 158.2936079 | 126.9735475 | 92.23960108 | 128.4303653 |
| ENSMUSG00000048310  | -0.181530764 | 4.304030695  | 0.397705943 | 0.528276388 | 0.999071534 | Pskh1         | Pskh1         | PSKH1    | 23.2295911  | 24.84252861 | 17.36861685 | 19.77390037 | 23.28331193 | 28.88657812 | 12.81362811 | 23.76436362 | 7.778296855 | 18.69266385 |
| ENSMUSG00000040328  | -0.323277244 | 1.933229392  | 0.397613676 | 0.528324234 | 0.999071534 | Olfrr56       | Olfrr56       | OR2V1    | 3.789721811 | 5.158233863 | 6.530061373 | 3.399723221 | 2.354492217 | 1.964578361 | 1.29430587  | 5.941090906 | 2.199922343 | 4.117614764 |
| ENSMUSG00000027368  | -0.200993401 | 3.477551462  | 0.397607755 | 0.528327305 | 0.999071534 | Dusp2         | Dusp2         | DUSP2    | 15.72032751 | 12.6880695  | 15.5509709  | 7.909560147 | 9.483371431 | 13.31547556 | 7.765835218 | 11.05319238 | 8.32827744  | 9.346331924 |
| ENSMUSG00000078289  | 0.495588704  | -0.442511089 | 0.397130487 | 0.528574926 | 0.999071534 | Gm10923       | Gm10923       |          | 1.263240604 | 0.296450222 | 0.538561763 | 0.20814632  | 0.327012808 | 0.582097292 | 1.100159989 | 0.621742072 | 0.628549241 | 0.457512752 |
| ENSMUSG00000000392  | 0.664671347  | 0.459664481  | 0.396971947 | 0.528657228 | 0.999071534 | Fap           | Fap           | FAP      | 1.824680872 | 0.652190488 | 1.95228639  | 0.277528426 | 0.261610246 | 2.473913492 | 5.177223478 | 0           | 0.078568655 | 0.065358965 |
| ENSMUSG00000068205  | -0.416321583 | 1.088410433  | 0.396857188 | 0.528716816 | 0.999071534 | Macrodr2      | Macrodr2      | MACROD2  | 1.543960738 | 2.54947191  | 2.154247051 | 3.469105327 | 1.962076848 | 1.382481069 | 2.847472913 | 1.519813953 | 0           | 2.679717545 |
| ENSMUSG000000032192 | -0.288408949 | 2.54870492   | 0.396764767 | 0.528764813 | 0.999071534 | Gnb5          | Gnb5          | GNB5     | 7.298723488 | 11.32439848 | 3.029409915 | 4.371072713 | 6.801866406 | 7.567264798 | 4.918362304 | 8.151729382 | 1.964216377 | 3.006512367 |
| ENSMUSG000000035078 | -0.27028984  | 4.025154381  | 0.396654466 | 0.528822107 | 0.999071534 | Mtmr9         | Mtmr9         | MTMR9    | 27.86147332 | 30.23792265 | 5.520258068 | 13.18260024 | 15.5004071  | 25.9033295  | 23.03864448 | 8.013564478 | 5.106962581 | 12.41820326 |
| ENSMUSG000000027199 | -0.178229713 | 7.574056265  | 0.396425512 | 0.528941069 | 0.999071534 | Gatm          | Gatm          | GATM     | 259.455584  | 187.2972503 | 163.6554557 | 213.4887419 | 226.4890708 | 271.0390517 | 245.2709623 | 97.88983504 | 118.8743752 | 154.2471562 |
| ENSMUSG00000033365  | -0.179201898 | 4.592321904  | 0.396397927 | 0.528955405 | 0.999071534 | Ipo13         | Ipo13         | IPO13    | 29.40543405 | 27.45129056 | 21.94639183 | 23.45115201 | 30.41219114 | 43.65729691 | 18.57328923 | 14.71456236 | 10.99961171 | 26.27430373 |
| ENSMUSG00000026872  | -0.140613972 | 5.634464688  | 0.396279047 | 0.529017196 | 0.999071534 | Zeb2          | Zeb2          | ZEB2     | 47.79260284 | 55.6733517  | 45.84507005 | 63.69277381 | 55.8537876  | 66.79566428 | 36.49942552 | 57.20027058 | 31.97744262 | 39.15001974 |
| ENSMUSG00000025902  | -0.311533359 | 1.742228004  | 0.396184592 | 0.5290663   | 0.999071534 | Sox17         | Sox17         | SOX17    | 1.614140771 | 4.268883197 | 5.049016526 | 4.02416218  | 3.400933203 | 2.182864846 | 1.812028217 | 3.937699786 | 1.649941757 | 4.182973728 |
| ENSMUSG00000049420  | 0.736380887  | -0.506876562 | 0.3961335   | 0.529092865 | 0.999071534 | Tmem200a      | Tmem200a      | TMEM200A | 0.491260235 | 0.237160178 | 0           | 1.040731598 | 0.457817931 | 1.309718907 | 0.841298815 | 0           | 1.335667137 | 0           |
| ENSMUSG00000037847  | 0.28656497   | 1.960841313  | 0.396063681 | 0.52912917  | 0.999071534 | Nmrk1         | Nmrk1         | NMRK1    | 3.859901845 | 2.786632087 | 4.443134543 | 2.705902155 | 3.858751134 | 2.255627007 | 3.300479967 | 3.661369977 | 5.578374512 | 4.313691657 |
| ENSMUSG000000000884 | 0.231631531  | 3.496063779  | 0.396061072 | 0.529130527 | 0.999071534 | Gnb1l         | Gnb1l         | GNB1L    | 14.73780704 | 7.589125684 | 6.866662475 | 11.79495811 | 12.29568158 | 16.0804377  | 18.8321504  | 5.941090906 | 10.13535651 | 7.908434705 |
| ENSMUSG000000026110 | -0.151885839 | 4.994908951  | 0.395961253 | 0.52918244  | 0.999071534 | Mgat4a        | Mgat4a        | MGAT4A   | 41.96766006 | 34.32893571 | 25.44704329 | 38.64583335 | 32.96289104 | 45.47635095 | 32.94008438 | 19.06675686 | 20.74212495 | 30.71871332 |
| ENSMUSG00000038766  | 0.137862449  | 5.422353593  | 0.395930541 | 0.529198414 | 0.999071534 | Gabpb2        | Gabpb2        | GABPB2   | 40.35351929 | 56.56270236 | 36.21827854 | 31.63824059 | 47.48225972 | 60.46535622 | 40.05876666 | 37.5808541  | 35.5130321  | 45.35912137 |
| ENSMUSG00000032403  | 0.254084496  | 2.408581468  | 0.395733236 | 0.529301059 | 0.999071534 | 2300009A05Rik | 2300009A05Rik | C15orf61 | 5.193322482 | 3.794562842 | 6.799342255 | 3.330341114 | 5.493815174 | 6.403070214 | 4.46535525  | 8.497141644 | 4.00700141  | 3.92153787  |
| ENSMUSG00000029518  | -0.141322618 | 5.712507061  | 0.395727767 | 0.529303905 | 0.999071534 | Rab35         | Rab35         | RAB35    | 62.81113002 | 71.26663338 | 42.41173882 | 47.59612509 | 61.80542071 | 80.183902   | 51.38394302 | 42.69295558 | 31.74173666 | 41.50294246 |
| ENSMUSG00000035759  | 0.296190482  | 1.925778418  | 0.395661549 | 0.529338362 | 0.999071534 | Bbs10         | Bbs10         | BBS10    | 3.36864161  | 2.430891821 | 2.558168373 | 3.885397967 | 4.839789558 | 2.764962138 | 3.559341141 | 7.115492597 | 1.885647722 | 4.117614764 |
| ENSMUSG000000085478 | 0.750448313  | -0.206152959 | 0.395638573 | 0.529350319 | 0.999071534 | Gm11851       | Gm11851       |          | 0           | 0.592900444 | 0.134640441 | 1.457024238 | 0.588623054 | 0.873145938 | 0           | 0           | 0.785686551 | 2.810435474 |
| ENSMUSG00000038860  | 0.250030628  | 2.973488197  | 0.395635754 | 0.529351786 | 0.999071534 | GarnB         | GarnB         | GARNL3   | 5.052962415 | 6.166164618 | 9.963392611 | 7.076974868 | 8.306125323 | 5.74821076  | 5.371369359 | 6.148338263 | 10.37106247 | 11.50317775 |
| ENSMUSG000000027412 | 0.274719977  | 2.221752682  | 0.395580386 | 0.529380602 | 0.999071534 | Lpin3         | Lpin3         | LPIN3    | 5.263502516 | 6.344034752 | 4.039213221 | 1.526406344 | 4.316569065 | 8.076599929 | 4.724216424 | 4.559441858 | 2.592765618 | 4.836563373 |
| ENSMUSG000000097331 | -0.472674279 | -0.152759899 | 0.395565808 | 0.52938819  | 0.999071534 | F420014N23Rik | F420014N23Rik |          | 1.333420637 | 0.889350666 | 0.605881983 | 1.179495811 | 0.588623054 | 0.363810808 | 0.258861174 | 0.898071881 | 0.235705965 | 1.30717929  |
| ENSMUSG00000053553  | 0.248215419  | 4.227330939  | 0.395444949 | 0.529451101 | 0.999071534 | 3110082117Rik | 3110082117Rik | C7orf50  | 29.12471392 | 21.87802639 | 9.82875217  | 12.07248654 | 16.02362759 | 30.34182135 | 38.95860667 | 10.0169556  | 7.071178959 | 15.49007459 |
| ENSMUSG00000059182  | 0.143687155  | 5.995927958  | 0.39533894  | 0.529506293 | 0.999071534 | Skap2         | Skap2         | SKAP2    | 62.67076995 | 78.32214866 | 58.77055236 | 50.51017357 | 64.8793411  | 77.78275067 | 96.74936375 | 52.01908665 | 44.86270206 | 55.55511983 |
| ENSMUSG00000052369  | -0.157470619 | 4.844334681  | 0.395115542 | 0.529622637 | 0.999071534 | Tmem106c      | Tmem106c      | TMEM106C | 28.77381375 | 33.79532531 | 23.96599844 | 29.20986686 | 41.13821124 | 24.15703763 | 23.29750565 | 32.88324734 | 16.81369219 | 33.46378983 |
| ENSMUSG00000048264  | -0.188025316 | 4.226317716  | 0.395076378 | 0.529643039 | 0.999071534 | Dip2c         | Dip2c         | DIP2C    | 15.01852718 | 26.14690958 | 18.58038081 | 15.74973819 | 27.66528356 | 26.19437815 | 10.8721693  | 23.41895136 | 11.39245499 | 13.79074151 |

|                     |              |              |             |             |             |           |           |                |             |             |             |             |             |             |             |             |             |             |
|---------------------|--------------|--------------|-------------|-------------|-------------|-----------|-----------|----------------|-------------|-------------|-------------|-------------|-------------|-------------|-------------|-------------|-------------|-------------|
| ENSMUSG00000021615  | 0.188961348  | 3.744314955  | 0.395004568 | 0.529680449 | 0.999071534 | Xrcc4     | Xrcc4     | XRCC4          | 11.57970553 | 11.20581839 | 10.83855548 | 15.68035608 | 14.84638148 | 10.33222694 | 12.61948223 | 14.09282029 | 13.59237733 | 16.2090232  |
| ENSMUSG00000018501  | 0.228805729  | 7.16751594   | 0.394860077 | 0.529755738 | 0.999071534 | Ncor1     | Ncor1     | NCOR1          | 82.46153941 | 113.0661147 | 186.1404092 | 166.7945841 | 133.6174333 | 117.583653  | 54.23141594 | 150.3924989 | 213.3924672 | 180.456101  |
| ENSMUSG00000018765  | -0.146684047 | 5.969108923  | 0.394702597 | 0.529837817 | 0.999071534 | Fxr2      | Fxr2      | FXR2           | 73.54867515 | 86.80062501 | 50.75944614 | 56.40765262 | 74.82053047 | 92.69899378 | 48.47175482 | 57.6147653  | 32.84169783 | 63.98642625 |
| ENSMUSG00000053819  | -0.14096312  | 6.248143893  | 0.394617666 | 0.529882093 | 0.999071534 | Camk2d    | Camk2d    | CAMK2D         | 59.37230838 | 98.59934385 | 96.13327465 | 77.3610488  | 81.29538406 | 82.439529   | 55.84929827 | 81.65545873 | 56.64800033 | 72.74452749 |
| ENSMUSG00000034575  | 0.16447869   | 4.563691891  | 0.394571909 | 0.529905949 | 0.999071534 | Papd7     | Papd7     | PAPD7          | 22.10671057 | 26.02832949 | 18.17645949 | 18.24749402 | 31.13161932 | 42.63862665 | 23.94465859 | 22.65904439 | 15.24231909 | 19.73840728 |
| ENSMUSG00000042302  | -0.163825009 | 4.42867486   | 0.394536494 | 0.529924414 | 0.999071534 | Ehbp1     | Ehbp1     | EHBP1          | 19.22932919 | 25.13897883 | 26.99540836 | 18.87193298 | 27.40367331 | 20.8099782  | 12.8783434  | 23.90252853 | 16.65655488 | 22.81027861 |
| ENSMUSG00000084274  | 0.321805968  | 1.491258662  | 0.394360569 | 0.530016161 | 0.999071534 | Gm12504   | Gm12504   |                | 1.684320805 | 1.007930755 | 4.173853661 | 2.636520049 | 2.812310149 | 3.056010784 | 2.588611739 | 2.832380548 | 1.492804447 | 4.575127515 |
| ENSMUSG00000024232  | 0.361378214  | 1.96382794   | 0.394337077 | 0.530028414 | 0.999071534 | Bambi     | Bambi     | BAMBI          | 5.193322482 | 3.49811262  | 3.500651458 | 1.942698983 | 3.073920395 | 4.947826984 | 9.707294022 | 2.141556024 | 0.392843275 | 4.117614764 |
| ENSMUSG00000002997  | 0.132881235  | 5.290398843  | 0.394196442 | 0.530101781 | 0.999071534 | Prkar2b   | Prkar2b   | PRKAR2B        | 38.45865838 | 37.82704833 | 34.80455392 | 33.78908589 | 48.79031095 | 49.40550767 | 42.58266311 | 30.60352641 | 35.82730672 | 39.28073767 |
| ENSMUSG00000006599  | -0.130752037 | 5.681828725  | 0.394123188 | 0.530140003 | 0.999071534 | Gtf2h1    | Gtf2h1    | GTTF2H1        | 55.72294663 | 67.59065062 | 52.77905275 | 50.71831989 | 51.27560829 | 63.88517782 | 55.91401357 | 49.32487101 | 31.89887397 | 39.01930181 |
| ENSMUSG000000045761 | 0.412791692  | 1.105664248  | 0.394107195 | 0.530148348 | 0.999071534 | Fam179a   | Fam179a   | FAM179A        | 1.894860906 | 1.363671021 | 1.817645949 | 1.110113705 | 2.87771271  | 0.654859454 | 0.453007054 | 2.279720929 | 1.649941757 | 5.816947841 |
| ENSMUSG00000002489  | -0.335235784 | 1.788209322  | 0.394039773 | 0.530183533 | 0.999071534 | Tiam1     | Tiam1     | TIAM1          | 3.579181711 | 5.869714396 | 3.164050356 | 2.01208109  | 4.708984435 | 8.076599929 | 2.912188207 | 1.796143762 | 1.335667137 | 1.176461361 |
| ENSMUSG00000024847  | -0.129174857 | 6.331225444  | 0.393915793 | 0.530248243 | 0.999071534 | Alp       | Alp       | ALP            | 94.25178505 | 84.7847635  | 79.50518022 | 83.95234892 | 93.85267589 | 75.67264798 | 84.3240274  | 77.7868414  | 54.91948991 | 78.56147533 |
| ENSMUSG00000020134  | 0.172347774  | 5.549933727  | 0.393899696 | 0.530256645 | 0.999071534 | Pel1      | Pel1      | PEL1           | 36.84451761 | 35.57402664 | 56.34702443 | 53.63236836 | 44.47374189 | 35.50793482 | 33.65195261 | 56.3021987  | 59.94788384 | 44.96696758 |
| ENSMUSG000000093577 | -0.317779585 | 1.443851538  | 0.393874816 | 0.530269634 | 0.999071534 | Gm20632   | Gm20632   |                | 1.263240604 | 2.668051998 | 4.577774983 | 3.538487434 | 2.746907587 | 2.619437815 | 1.29430587  | 1.934308667 | 2.435628308 | 2.745076509 |
| ENSMUSG00000030283  | 0.501007647  | -0.317011381 | 0.393864848 | 0.530274837 | 0.999071534 | St8sia1   | St8sia1   | ST8SIA1        | 0.350900168 | 0.5336104   | 0.942483085 | 0.346910533 | 0.719428178 | 1.164194584 | 0.517722348 | 0.069082452 | 1.021392516 | 1.045743432 |
| ENSMUSG00000037703  | 0.243592645  | 2.785012468  | 0.393669753 | 0.530376704 | 0.999071534 | Ltts3     | Ltts3     | RPS-1187M17.10 | 9.12340436  | 8.952796705 | 5.183656966 | 3.677251647 | 5.428412612 | 12.87890259 | 6.730390522 | 7.322739954 | 4.32127603  | 5.424794054 |
| ENSMUSG000000061032 | -0.15090899  | 7.641044496  | 0.393630514 | 0.530397196 | 0.999071534 | Rrp1      | Rrp1      | RRP1           | 207.171459  | 213.7999001 | 221.4835249 | 183.654436  | 266.5154385 | 241.6431384 | 161.7235184 | 171.1172346 | 143.7806388 | 204.377482  |
| ENSMUSG000000040396 | 0.158728381  | 5.216460516  | 0.393597249 | 0.53041457  | 0.999071534 | Abhd13    | Abhd13    | ABHD13         | 36.28307734 | 36.99698771 | 34.60259326 | 30.38936267 | 44.08132652 | 49.98760497 | 58.04961825 | 39.30791541 | 21.13496822 | 24.44425272 |
| ENSMUSG00000030007  | 0.162181924  | 8.351468006  | 0.393545684 | 0.530441503 | 0.999071534 | Cct7      | Cct7      | CCT7           | 350.6194476 | 310.5612526 | 343.400444  | 282.59332   | 314.7171264 | 415.6174666 | 445.6942262 | 246.624355  | 282.7685897 | 285.8147518 |
| ENSMUSG00000033323  | -0.19362099  | 4.750229273  | 0.393532283 | 0.530448503 | 0.999071534 | Ctdp1     | Ctdp1     | CTDP1          | 33.475876   | 35.98905696 | 29.68821717 | 17.90058349 | 32.30886543 | 52.7525671  | 24.13880447 | 22.52087948 | 9.035395336 | 19.80376624 |
| ENSMUSG00000022438  | -0.222149481 | 3.594428463  | 0.393336131 | 0.530550982 | 0.999071534 | Parvb     | Parvb     | PARVB          | 17.12392818 | 14.88180115 | 12.05031944 | 9.782877023 | 13.27672    | 24.59361059 | 10.09558578 | 9.80970824  | 4.085570065 | 8.169870563 |
| ENSMUSG00000048874  | 0.15493969   | 5.822100388  | 0.393323029 | 0.530557828 | 0.999071534 | Phf3      | Phf3      | PHF3           | 38.03757818 | 68.24284111 | 56.41434465 | 43.64134502 | 71.81201263 | 63.30308052 | 39.92933608 | 79.85931497 | 45.33411399 | 58.43091427 |
| ENSMUSG00000022517  | -0.166381205 | 5.51431383   | 0.392878266 | 0.53079033  | 0.999071534 | Mgrn1     | Mgrn1     | MGRN1          | 53.12628539 | 72.51172431 | 36.28559876 | 36.84189858 | 52.77986721 | 76.4002696  | 44.00639957 | 41.10405917 | 20.19214436 | 34.96704601 |
| ENSMUSG00000024976  | 0.13793876   | 6.101418011  | 0.39268064  | 0.530893699 | 0.999071534 | Shoc2     | Shoc2     | SHOC2          | 55.4422265  | 73.22320484 | 70.55159092 | 65.35794437 | 74.03569973 | 65.84975618 | 71.12210753 | 79.79023251 | 67.25476876 | 57.97340152 |
| ENSMUSG00000020153  | -0.154044668 | 6.769581253  | 0.392355356 | 0.531063918 | 0.999071534 | Ndufs7    | Ndufs7    | NDUFS7         | 129.692702  | 75.89125684 | 141.2378223 | 134.1849941 | 112.8848213 | 95.31843159 | 104.968206  | 84.97141644 | 86.58265792 | 123.1362891 |
| ENSMUSG00000070526  | 0.33187243   | 1.61960411   | 0.392320881 | 0.531081964 | 0.999071534 | Peg12     | Peg12     | FRAT1          | 2.526481208 | 1.067220799 | 4.779735644 | 1.595788451 | 3.597140888 | 4.875064822 | 4.012348196 | 1.519813953 | 1.571373102 | 4.379050622 |
| ENSMUSG00000024563  | 0.179978929  | 4.778716072  | 0.391944255 | 0.531279185 | 0.999071534 | Smad2     | Smad2     | SMAD2          | 31.79155519 | 34.68467598 | 20.12874588 | 19.63513615 | 27.46907587 | 49.18722119 | 37.40543963 | 22.93537419 | 11.62816095 | 25.48999616 |
| ENSMUSG00000029624  | -0.182655569 | 3.478348853  | 0.391785337 | 0.531362443 | 0.999071534 | Ptcd1     | Ptcd1     | ATP5J2-PTCD1   | 12.42186594 | 11.73942879 | 11.37711724 | 13.11321814 | 12.03407133 | 11.71470801 | 11.13103048 | 10.70778012 | 7.149747614 | 9.477049853 |
| ENSMUSG00000027828  | 0.161077036  | 9.251639476  | 0.391713013 | 0.531400341 | 0.999071534 | Ssr3      | Ssr3      | SSR3           | 568.3179116 | 608.3751457 | 616.5185779 | 586.4175646 | 606.4125511 | 606.5453784 | 814.118392  | 597.9086255 | 554.3804304 | 511.826051  |
| ENSMUSG00000036977  | 0.204463473  | 3.944591444  | 0.391677664 | 0.531418866 | 0.999071534 | Anapc10   | Anapc10   | ANAPC10        | 18.31698875 | 18.43920381 | 11.10783636 | 15.19468133 | 10.52981242 | 10.98708639 | 27.05099267 | 14.99089217 | 12.02100423 | 13.0717929  |
| ENSMUSG00000024205  | 0.415404268  | 0.615334049  | 0.391637729 | 0.531439796 | 0.999071534 | Rpl36-ps2 | Rpl36-ps2 |                | 0.350900168 | 1.600831199 | 1.279084186 | 0.416292639 | 2.616102464 | 1.528005392 | 1.29430587  | 2.763298096 | 0.628549241 | 1.568615148 |
| ENSMUSG00000062031  | -0.203045438 | 3.44840902   | 0.391545163 | 0.531488315 | 0.999071534 | Athl1     | Athl1     | ATHL1          | 12.49204597 | 13.99245048 | 8.347707322 | 12.35001497 | 12.75349951 | 15.57110257 | 8.283557565 | 11.4676871  | 4.792687961 | 9.86920364  |
| ENSMUSG00000036860  | 0.178853094  | 4.210074694  | 0.391541934 | 0.531490007 | 0.999071534 | Mrpl55    | Mrpl55    | MRPL55         | 24.0717515  | 11.20581839 | 21.07122897 | 17.41490874 | 15.69661478 | 16.88082147 | 22.13263037 | 17.2706131  | 19.72073243 | 16.60117698 |
| ENSMUSG00000039220  | -0.151424651 | 5.076751506  | 0.391462323 | 0.531531743 | 0.999071534 | Ppp1r10   | Ppp1r10   | PPP1R10        | 38.45865838 | 35.87047687 | 34.66991348 | 26.5039647  | 49.18272632 | 48.82341038 | 20.77360921 | 26.38949681 | 24.19914577 | 36.79709702 |
| ENSMUSG00000029174  | 0.190706354  | 4.51026056   | 0.391427133 | 0.531550192 | 0.999071534 | Tbc1d1    | Tbc1d1    | TBC1D1         | 29.12471392 | 29.58573216 | 15.28169002 | 12.6969255  | 24.13354523 | 42.85691314 | 26.59798562 | 22.03730231 | 10.60676844 | 19.93448417 |
| ENSMUSG00000040018  | -0.175359745 | 3.935831547  | 0.391418809 | 0.531554557 | 0.999071534 | Cox15     | Cox15     | COX15          | 18.94860906 | 17.01624274 | 15.75293156 | 11.23990126 | 21.1250274  | 19.20921064 | 15.46695514 | 12.98750105 | 7.542590889 | 15.29399769 |
| ENSMUSG00000061232  | -0.163476917 | 9.949964825  | 0.39133106  | 0.531600569 | 0.999071534 | H2-K1     | H2-K1     |                | 1011.504823 | 978.5228929 | 1224.150887 | 1154.657017 | 1042.516832 | 1141.420028 | 633.3685773 | 913.9608452 | 836.8347454 | 981.8223648 |
| ENSMUSG00000022533  | 0.157242244  | 7.441786386  | 0.391314604 | 0.531609198 | 0.999071534 | Atp13a3   | Atp13a3   | ATP13A3        | 126.0433402 | 201.1118306 | 169.9835564 | 181.0872981 | 172.6627626 | 245.1357222 | 169.7482148 | 198.3357208 | 144.9591687 | 135.4237745 |

|                     |              |              |             |             |             |               |               |          |             |             |             |             |             |             |             |             |             |             |
|---------------------|--------------|--------------|-------------|-------------|-------------|---------------|---------------|----------|-------------|-------------|-------------|-------------|-------------|-------------|-------------|-------------|-------------|-------------|
| ENSMUSG00000032652  | -0.27272981  | 2.479378146  | 0.391295802 | 0.531619059 | 0.999071534 | Crebl2        | Crebl2        | CREBL2   | 6.947823321 | 7.885575906 | 3.096730136 | 7.770795933 | 5.101399804 | 3.638108076 | 3.882917609 | 5.319348834 | 6.756904338 | 3.267948225 |
| ENSMUSG00000021917  | -0.231861217 | 7.622047307  | 0.391262496 | 0.531636526 | 0.999071534 | Spcs1         | Spcs1         | SPCS1    | 317.6348318 | 235.6186365 | 150.326052  | 218.2067251 | 183.5849904 | 210.5009333 | 380.4612104 | 97.33717542 | 62.85492408 | 151.9595925 |
| ENSMUSG00000086894  | 0.388305477  | 0.641400727  | 0.390992368 | 0.531778232 | 0.999071534 | Gm15708       | Gm15708       |          | 0.912340436 | 1.956571465 | 0.875162864 | 1.179495811 | 1.504258917 | 1.091432423 | 0.453007054 | 2.625133191 | 1.571373102 | 1.895409971 |
| ENSMUSG00000039801  | 0.148242099  | 5.682076253  | 0.390559181 | 0.532005619 | 0.999071534 | 2410089E03Rik | 2410089E03Rik | C5orf42  | 45.12576157 | 41.79948131 | 59.98231632 | 50.16326303 | 54.80734662 | 52.7525671  | 32.42236203 | 56.23311625 | 52.64099892 | 62.4178111  |
| ENSMUSG00000032384  | 0.15158709   | 5.058253913  | 0.390501971 | 0.532035663 | 0.999071534 | Csnk1g1       | Csnk1g1       | CSNK1G1  | 23.58049127 | 37.23414789 | 39.71893    | 30.45874478 | 32.04725518 | 38.34565912 | 22.00319978 | 37.64993655 | 30.40606952 | 39.67289145 |
| ENSMUSG00000027900  | 0.142828469  | 5.945856767  | 0.390307652 | 0.532137731 | 0.999071534 | Dram2         | Dram2         | DRAM2    | 55.93348673 | 56.32554219 | 64.62741153 | 64.73350541 | 61.21679765 | 48.0230266  | 67.75691227 | 68.94428749 | 63.1691987  | 56.92765808 |
| ENSMUSG00000032333  | -0.229431278 | 3.073810564  | 0.390121044 | 0.532235783 | 0.999071534 | Stoml1        | Stoml1        | STOML1   | 8.070703857 | 8.419186306 | 12.18495988 | 9.158438064 | 8.502333007 | 7.130691829 | 4.788931717 | 9.326131073 | 4.242707375 | 11.50317775 |
| ENSMUSG00000030541  | -0.144511806 | 6.731071273  | 0.390119733 | 0.532236472 | 0.999071534 | Idh2          | Idh2          | IDH2     | 122.3237985 | 133.1654397 | 94.18098826 | 101.7141682 | 128.5814361 | 139.194015  | 123.6062105 | 87.45838473 | 54.68378395 | 94.8358575  |
| ENSMUSG00000039013  | -0.535374784 | -0.253332229 | 0.390056993 | 0.532269445 | 0.999071534 | Siglec5       | Siglec5       |          | 1.122880537 | 0.177870133 | 1.346404407 | 1.318260024 | 0.327012808 | 0.291048646 | 1.48845175  | 0.138164905 | 0.31427462  | 0.522871716 |
| ENSMUSG00000028692  | -0.167444274 | 8.827800098  | 0.389594623 | 0.532512562 | 0.999071534 | Akr1a1        | Akr1a1        | AKR1A1   | 601.3025274 | 514.8747456 | 454.007566  | 454.4527979 | 474.3647793 | 568.2724815 | 583.6672319 | 337.6750273 | 245.9198905 | 380.7813272 |
| ENSMUSG00000024276  | 0.149964922  | 4.344628583  | 0.389491413 | 0.532566858 | 0.999071534 | Zfp397        | Zfp397        | ZNF397   | 22.52779077 | 22.47092683 | 16.29149332 | 17.27614453 | 21.05962483 | 24.44808627 | 24.39766564 | 21.27739534 | 14.22092657 | 19.21553556 |
| ENSMUSG00000020402  | -0.156472306 | 8.231449177  | 0.389438676 | 0.532594605 | 0.999071534 | Vdac1         | Vdac1         | VDAC1    | 320.7227533 | 380.582795  | 302.8736713 | 265.7334681 | 379.8580777 | 339.7265321 | 296.2666135 | 278.678613  | 205.1427585 | 264.9652421 |
| ENSMUSG00000068391  | 0.175317305  | 4.795375937  | 0.389421848 | 0.53260346  | 0.999071534 | Chrac1        | Chrac1        | CHRA1    | 33.0547958  | 22.2930567  | 20.93658853 | 31.01380163 | 27.27286819 | 28.37724299 | 50.54264421 | 23.34986891 | 16.9708295  | 23.72530412 |
| ENSMUSG00000007097  | -0.476594688 | 0.323491743  | 0.389411659 | 0.532608821 | 0.999071534 | Atp1a2        | Atp1a2        | ATP1A2   | 3.087921476 | 0.948640711 | 1.346404407 | 1.040731598 | 0.39241537  | 1.236956746 | 0.19414588  | 0.27632981  | 1.649941757 | 1.045743432 |
| ENSMUSG00000026709  | 0.211987678  | 3.160016124  | 0.388928107 | 0.532863373 | 0.999071534 | Dars2         | Dars2         | DARS2    | 6.877643287 | 9.664277238 | 11.71371834 | 5.897479057 | 8.306125323 | 14.5524323  | 10.09558578 | 7.046410144 | 7.228316269 | 7.712357812 |
| ENSMUSG00000089665  | -0.588840496 | -0.300824551 | 0.388724022 | 0.532970873 | 0.999071534 | Fcor          | Fcor          |          | 0.350900168 | 0.770770577 | 1.144443746 | 1.80393477  | 0.130805123 | 0.072762162 | 0.323576467 | 0.138164905 | 1.335667137 | 0.522871716 |
| ENSMUSG00000014599  | 0.151898461  | 7.129074052  | 0.388337351 | 0.533174658 | 0.999071534 | Csf1          | Csf1          | CSF1     | 137.6932258 | 115.1412662 | 144.8731142 | 118.6434022 | 173.1859831 | 229.4918574 | 150.1394809 | 114.8150359 | 116.7530215 | 114.5742648 |
| ENSMUSG00000028862  | 0.264012026  | 2.68880743   | 0.387848408 | 0.533432543 | 0.999071534 | Map3k6        | Map3k6        | MAP3K6   | 4.912602348 | 3.675982753 | 6.732022034 | 6.521918016 | 7.913709953 | 6.548594537 | 3.494625848 | 7.806317121 | 9.663944577 | 4.64048648  |
| ENSMUSG00000030086  | -0.204248212 | 3.98856481   | 0.387791307 | 0.533462675 | 0.999071534 | Chchd6        | Chchd6        | CHCHD6   | 25.40517214 | 15.77115181 | 15.01240914 | 18.24749402 | 13.01510976 | 18.918162   | 23.68579741 | 8.220811835 | 11.47102364 | 9.28097296  |
| ENSMUSG00000020250  | 0.157831275  | 7.678268159  | 0.387196224 | 0.533776879 | 0.999071534 | Txnrd1        | Txnrd1        | TXNRD1   | 210.8208208 | 216.8829824 | 185.1979262 | 165.1987957 | 229.890004  | 308.7298513 | 267.5330232 | 181.5486849 | 143.3092269 | 165.0967443 |
| ENSMUSG00000021900  | 0.178675923  | 4.349582913  | 0.386819232 | 0.533976105 | 0.999071534 | Btd           | Btd           | BTD      | 17.05374815 | 20.92938568 | 15.75293156 | 17.13738032 | 28.05769892 | 15.71662689 | 16.8906916  | 26.66582662 | 23.02061594 | 18.62730488 |
| ENSMUSG00000069539  | 0.165128321  | 5.105338164  | 0.386561926 | 0.534112158 | 0.999071534 | Scyl2         | Scyl2         | SCYL2    | 29.68615419 | 50.8708581  | 30.56338004 | 17.62305506 | 40.41878307 | 37.98184831 | 29.05716677 | 44.62726425 | 26.87048004 | 36.60102012 |
| ENSMUSG00000040661  | -0.166523597 | 4.188026357  | 0.386311401 | 0.534244686 | 0.999071534 | Rad54l2       | Rad54l2       | RAD54L2  | 22.8085109  | 23.77530781 | 19.59018412 | 14.91715291 | 18.63973005 | 28.66829164 | 13.00777399 | 16.64887103 | 10.99961171 | 15.55543355 |
| ENSMUSG00000028018  | 0.176364446  | 4.64291903   | 0.386232508 | 0.534286433 | 0.999071534 | Gstcd         | Gstcd         | GSTCD    | 30.03705436 | 18.43920381 | 32.17906532 | 17.48429085 | 23.41411705 | 34.78031321 | 36.11113376 | 16.78703593 | 24.04200846 | 16.53581802 |
| ENSMUSG00000003269  | 0.145187488  | 6.463426146  | 0.385962304 | 0.534429459 | 0.999071534 | Cyth2         | Cyth2         | CYTH2    | 81.40883891 | 71.20734333 | 92.36334231 | 94.35966491 | 94.11428614 | 83.82201007 | 66.39789111 | 100.6531331 | 90.35395336 | 98.23452365 |
| ENSMUSG00000022151  | -0.197079388 | 4.564642447  | 0.385960712 | 0.534430302 | 0.999071534 | Ttc33         | Ttc33         | TTC33    | 34.17767633 | 33.02455473 | 14.06992605 | 26.4345826  | 22.95629912 | 28.37724299 | 35.46398083 | 14.30006765 | 10.05678785 | 20.78415071 |
| ENSMUSG00000001588  | 0.277681741  | 3.092137686  | 0.385900264 | 0.534462308 | 0.999071534 | Acap1         | Acap1         | ACAP1    | 7.860163757 | 11.14652835 | 7.405224238 | 5.203657991 | 7.979112515 | 7.858313444 | 2.070889391 | 15.12905707 | 6.756904338 | 12.1567674  |
| ENSMUSG00000003070  | -0.331294899 | 1.030623527  | 0.385802685 | 0.534513982 | 0.999071534 | Efna2         | Efna2         | EFNA2    | 1.614140771 | 0.948640711 | 2.356207712 | 3.052812688 | 3.008517833 | 2.837724299 | 1.48845175  | 1.243484143 | 1.178529826 | 1.633974113 |
| ENSMUSG00000070390  | -0.401568023 | 1.003367218  | 0.385661752 | 0.53458863  | 0.999071534 | Nlrp1b        | Nlrp1b        | NLRP1    | 4.35116208  | 2.312311732 | 1.88496617  | 1.665170557 | 0.850233301 | 4.074681045 | 2.459181152 | 0.552659619 | 0.392843275 | 0.915025503 |
| ENSMUSG00000001642  | 0.139950507  | 6.885839831  | 0.385379074 | 0.534738413 | 0.999071534 | Akr1b3        | Akr1b3        | AKR1B1   | 120.4289376 | 100.7930755 | 130.0626657 | 114.8967684 | 117.0051827 | 116.1284098 | 137.0022763 | 124.6938266 | 83.9898923  | 137.1231075 |
| ENSMUSG000000054920 | 0.142426497  | 6.149556682  | 0.385378645 | 0.534738641 | 0.999071534 | Klh5          | Klh5          | KLHL5    | 61.12680921 | 57.8077933  | 79.1012589  | 69.31272444 | 82.0802148  | 74.07188043 | 57.20831944 | 67.70080335 | 81.08285206 | 72.67916853 |
| ENSMUSG000000044139 | 0.539131008  | -0.318363754 | 0.385211414 | 0.534827288 | 0.999071534 | Prss53        | Prss53        | PRSS53   | 0.491260235 | 0.474320355 | 0           | 0.901967385 | 0.981038424 | 1.236956746 | 0.323576467 | 0.621742072 | 1.257098482 | 0.392153787 |
| ENSMUSG00000036613  | -0.207374634 | 3.87708146   | 0.385196339 | 0.53483528  | 0.999071534 | Tssc1         | Tssc1         | TSSC1    | 24.91391191 | 17.25340292 | 10.29999371 | 14.15394974 | 14.71557636 | 24.22979979 | 17.99085159 | 8.980718811 | 7.228316269 | 9.673126747 |
| ENSMUSG000000024575 | 0.505865081  | 0.595188609  | 0.385184793 | 0.534841402 | 0.999071534 | Pde6a         | Pde6a         | PDE6A    | 0.140360067 | 0.830060622 | 2.827449254 | 1.873316877 | 0.196207685 | 0.582097292 | 0.517722348 | 1.243484143 | 2.749902928 | 2.287563758 |
| ENSMUSG00000038323  | 0.18885702   | 4.199471409  | 0.385107283 | 0.5348825   | 0.999071534 | 1700066M21Rik | 1700066M21Rik | C2orf69  | 18.52752886 | 11.97658897 | 14.54116759 | 22.06350988 | 21.1250274  | 20.2278809  | 31.58106322 | 13.74740803 | 15.00661312 | 13.59466462 |
| ENSMUSG000000004054 | -0.143261671 | 4.828384671  | 0.385034673 | 0.534921005 | 0.999071534 | Map3k11       | Map3k11       | MAP3K11  | 35.37073691 | 29.34857198 | 24.97580175 | 28.72419211 | 36.03681144 | 42.49310233 | 23.36222095 | 22.52087948 | 18.30649664 | 26.53573959 |
| ENSMUSG00000037815  | -0.174645418 | 8.060061512  | 0.384740882 | 0.535076854 | 0.999071534 | Ctnna1        | Ctnna1        | CTNNA1   | 222.6110664 | 300.4819451 | 323.4063385 | 289.1846201 | 331.5909873 | 282.3171867 | 141.5323468 | 311.7691077 | 220.7779208 | 248.2987062 |
| ENSMUSG00000029729  | 0.153391246  | 4.679749592  | 0.384426062 | 0.53524395  | 0.999071534 | Zkscan1       | Zkscan1       | ZKSCAN1  | 21.26455016 | 31.2458534  | 24.1679591  | 19.91266458 | 29.10413991 | 26.19437815 | 21.03247038 | 24.45518815 | 21.60638015 | 35.94743048 |
| ENSMUSG00000048865  | -0.17839962  | 4.319929805  | 0.384219492 | 0.535353642 | 0.999071534 | Arhgap30      | Arhgap30      | ARHGAP30 | 25.61571224 | 27.03626025 | 20.12874588 | 17.55367296 | 19.35915823 | 37.32698886 | 14.23736457 | 11.53676955 | 12.64955347 | 18.10443317 |

|                    |              |              |             |              |             |               |               |           |  |  |             |              |              |             |             |             |             |             |             |             |
|--------------------|--------------|--------------|-------------|--------------|-------------|---------------|---------------|-----------|--|--|-------------|--------------|--------------|-------------|-------------|-------------|-------------|-------------|-------------|-------------|
| ENSMUSG00000071568 | 0.444422079  | 0.877745525  | 0.384196973 | 0.535365602  | 0.999071534 | Gm5874        | Gm5874        |           |  |  | 3.579181711 | 0.830060622  | 0.134640441  | 1.734552664 | 1.24264867  | 2.473913492 | 4.335924663 | 0.898071881 | 1.257098482 | 0.71894861  |
| ENSMUSG00000053604 | -0.169280991 | 4.493635483  | 0.384135977 | 0.535398001  | 0.999071534 | Rpia          | Rpia          | PIA       |  |  | 20.00130956 | 19.32855448  | 31.50586312  | 29.07110264 | 22.56388375 | 34.19821592 | 21.22661626 | 15.40538688 | 11.31388633 | 23.33315033 |
| ENSMUSG00000067629 | -0.249188388 | 2.657223117  | 0.38409855  | 0.535417883  | 0.999071534 | Syngap1       | Syngap1       | SYNGAP1   |  |  | 4.702062247 | 9.427117061  | 5.654898509  | 5.342422204 | 9.810384239 | 5.602686437 | 3.624056435 | 8.08264693  | 3.299883514 | 6.713973344 |
| ENSMUSG00000057346 | -0.184935491 | 5.350123925  | 0.384042291 | 0.535447771  | 0.999071534 | Apol9a        | Apol9a        | APOL1     |  |  | 42.31856023 | 49.38860699  | 50.75944614  | 32.95650061 | 49.96755706 | 34.12545375 | 16.8906916  | 55.95678644 | 22.70634132 | 53.98650468 |
| ENSMUSG00000062480 | 0.332055799  | 1.4306507    | 0.383904042 | 0.53552123   | 0.999071534 | Acat3         | Acat3         | ACAT2     |  |  | 2.737021308 | 1.837991377  | 3.433331237  | 1.595788451 | 2.223687094 | 0.800383777 | 2.653327033 | 3.246875263 | 2.199922343 | 4.509768551 |
| ENSMUSG00000028597 | 0.588371243  | 1.036089945  | 0.383888803 | 0.535529328  | 0.999071534 | Gpx7          | Gpx7          | GPX7      |  |  | 3.649361744 | 0.711480533  | 2.288887492  | 0           | 1.373453794 | 4.220205368 | 6.083237587 | 0.552659619 | 0           | 1.045743432 |
| ENSMUSG00000027107 | -0.403831644 | 0.352628722  | 0.383846195 | 0.535551972  | 0.999071534 | Chrna1        | Chrna1        | CHRNA1    |  |  | 1.263240604 | 1.185800888  | 2.625488593  | 0.346910533 | 1.373453794 | 1.091432423 | 0.776583522 | 1.4507315   | 0.707117896 | 0.71894861  |
| ENSMUSG00000055653 | -0.394481657 | 0.472740695  | 0.383835121 | 0.535557857  | 0.999071534 | Gpc3          | Gpc3          | GPC3      |  |  | 1.894860906 | 1.185800888  | 1.077123525  | 2.01208109  | 1.177246109 | 1.382481069 | 2.265035272 | 0.828989429 | 0.471411931 | 0.392153787 |
| ENSMUSG00000020128 | 0.133391933  | 5.172829471  | 0.383652532 | 0.535654916  | 0.999071534 | Vps54         | Vps54         | VPS54     |  |  | 30.94939479 | 36.93769767  | 34.53527304  | 36.0093133  | 39.37234208 | 49.18722119 | 29.89846559 | 36.75186467 | 34.49163959 | 31.82981571 |
| ENSMUSG00000026240 | 0.156717381  | 4.22038897   | 0.383430097 | 0.535773199  | 0.999071534 | Cops7b        | Cops7b        | COPS7B    |  |  | 19.72058943 | 16.60121243  | 22.14835249  | 13.59889288 | 19.09754799 | 24.22979979 | 20.57946333 | 14.30006765 | 15.3994564  | 20.58807382 |
| ENSMUSG00000049657 | 0.243235934  | 2.5609068    | 0.383363073 | 0.535808849  | 0.999071534 | Zbtb5         | Zbtb5         | ZBTB5     |  |  | 4.912602348 | 7.766995817  | 4.443134543  | 4.301690606 | 6.082438228 | 10.69603774 | 6.795105815 | 3.592287524 | 3.378452169 | 6.928050238 |
| ENSMUSG00000001054 | -0.170269064 | 3.83890249   | 0.383156857 | 0.535918563  | 0.999071534 | Rmnd5b        | Rmnd5b        | RMND5B    |  |  | 16.70284798 | 16.4233423   | 18.51306059  | 11.23990126 | 15.30419941 | 17.46291877 | 12.03704459 | 14.30006765 | 10.76390575 | 10.39207536 |
| ENSMUSG00000027855 | 0.388938584  | 0.759915462  | 0.382938353 | 0.536034859  | 0.999071534 | Sycp1         | Sycp1         | SYCP1     |  |  | 2.035220973 | 1.600831199  | 1.077123525  | 0.832585279 | 1.504258917 | 1.018670261 | 1.68259763  | 3.45412262  | 0.31427462  | 2.091486864 |
| ENSMUSG00000024905 | 0.508821772  | 0.202782581  | 0.382771199 | 0.536123856  | 0.999071534 | Mt5           | Mt5           | TESMIN    |  |  | 1.543960738 | 0.711480533  | 0.269280881  | 0.763203172 | 1.111843547 | 1.091432423 | 1.035444696 | 0           | 1.257098482 | 2.352922722 |
| ENSMUSG00000036242 | 0.624023984  | -0.593767307 | 0.382611628 | 0.536208841  | 0.999071534 | 3632451006Rik | 3632451006Rik | C14orf37  |  |  | 0.561440268 | 0            | 1.211763966  | 0.20814632  | 0.196207685 | 1.018670261 | 1.100159989 | 0.27632981  | 0.707117896 | 0.065358965 |
| ENSMUSG00000085208 | 0.132688572  | 6.158684624  | 0.382189736 | 0.536433651  | 0.999071534 | 4632419122Rik | Brip1os       |           |  |  | 71.02219394 | 58.22282361  | 77.82217472  | 65.21918016 | 81.2299815  | 84.62239385 | 90.79555675 | 74.81629594 | 53.97666605 | 58.43091427 |
| ENSMUSG00000040749 | 0.229765712  | 3.995500155  | 0.382129639 | 0.536465688  | 0.999071534 | Slah1b        | Slah1b        | SLAH1     |  |  | 18.17662869 | 5.691844263  | 17.09933597  | 20.1208109  | 14.06155074 | 22.92008088 | 27.69814561 | 10.63869767 | 7.621159544 | 16.2090232  |
| ENSMUSG00000027367 | 0.137277465  | 5.578706335  | 0.381746502 | 0.536670017  | 0.999071534 | Stard7        | Stard7        | STARD7    |  |  | 56.84582717 | 44.40824326  | 43.55618256  | 44.5433124  | 46.63202642 | 77.20065338 | 60.05579235 | 35.57746298 | 30.72034414 | 44.83624965 |
| ENSMUSG00000022051 | 0.220977136  | 8.02872019   | 0.381696214 | 0.536696847  | 0.999071534 | Bnip3l        | Bnip3l        | BNIP3L    |  |  | 184.4331281 | 359.3569592  | 203.5763463  | 250.8163152 | 252.5846929 | 111.9082044 | 235.3048071 | 435.8411922 | 275.5402734 | 244.0503735 |
| ENSMUSG00000049401 | -0.134537004 | 6.037830944  | 0.381475229 | 0.536814775  | 0.999071534 | Ogfr          | Ogfr          | OGFR      |  |  | 82.60189948 | 82.70961195  | 60.79015897  | 69.10457812 | 61.21679765 | 92.77175594 | 64.5211476  | 49.25578856 | 40.14858276 | 62.94068282 |
| ENSMUSG00000036959 | -0.203921124 | 3.879258083  | 0.381329959 | 0.536892323  | 0.999071534 | Bcor1l        | Bcor1l        | BCORL1    |  |  | 11.2989854  | 19.68429474  | 17.83985839  | 15.19468133 | 16.93926345 | 13.38823772 | 5.824376413 | 18.23776743 | 13.27810271 | 13.72538255 |
| ENSMUSG00000021895 | -0.131796453 | 5.19162157   | 0.381296029 | 0.536910439  | 0.999071534 | Arhgef3       | Arhgef3       | ARHGEF3   |  |  | 38.80955855 | 47.43203553  | 36.89148075  | 38.92336177 | 35.44818839 | 36.59936725 | 29.05716677 | 35.78471034 | 30.0917949  | 35.55527669 |
| ENSMUSG00000029713 | -0.155065979 | 8.932899401  | 0.381010803 | 0.537062768  | 0.999071534 | Gnb2          | Gnb2          | GNB2      |  |  | 540.3862583 | 469.7550218  | 555.3918178  | 521.1290023 | 586.2031596 | 499.148428  | 381.8202315 | 487.2385367 | 396.9288456 | 460.0617511 |
| ENSMUSG00000021550 | -0.133033057 | 5.381041059  | 0.380972102 | 0.537083443  | 0.999071534 | 2210016F16Rik | 2210016F16Rik | C9orf64   |  |  | 48.42422314 | 40.25794015  | 52.91369319  | 45.09836926 | 38.52210878 | 45.47635095 | 38.95860667 | 29.15279491 | 36.53442462 | 40.98007074 |
| ENSMUSG00000078180 | -0.412420382 | 0.858272331  | 0.38090181  | 0.537120998  | 0.999071534 | Gm20900       | Gm20900       |           |  |  | 1.403600671 | 2.54947191   | 0.673202203  | 2.22022741  | 3.073920395 | 0.654859454 | 2.135604685 | 2.556050739 | 0.15713731  | 1.437897219 |
| ENSMUSG00000031812 | -0.169127001 | 7.513411545  | 0.380767267 | 0.537192894  | 0.999071534 | Map1lc3b      | Map1lc3b      | MAP1LC3B2 |  |  | 206.5398387 | 226.1322294  | 149.8548105  | 207.6606449 | 213.1469482 | 122.968053  | 180.0379465 | 233.4986891 | 126.3383974 | 156.53472   |
| ENSMUSG00000070167 | 0.304918178  | 1.472504262  | 0.380764109 | 0.537194582  | 0.999071534 | Gm25822       | Snora57       | SNORAS7   |  |  | 3.36864161  | 0.889350666  | 3.096730136  | 3.052812688 | 1.831271725 | 2.983248622 | 2.588611739 | 2.901463001 | 2.514196963 | 3.071871332 |
| ENSMUSG00000096921 | 0.588785561  | -0.370895551 | 0.380517515 | 0.537326401  | 0.999071534 | Gm26822       | Gm26822       |           |  |  | 0.070180034 | 0.711480533  | 1.346404407  | 0.069382107 | 0.523220493 | 0.145524323 | 0.388291761 | 0.483577167 | 1.728510412 | 0.71894861  |
| ENSMUSG00000036553 | -0.328756698 | 1.791334117  | 0.380393867 | 0.537392521  | 0.999071534 | Sh3tc1        | Sh3tc1        | SH3TC1    |  |  | 4.070441945 | 5.869714396  | 3.702612119  | 2.01208109  | 3.662543449 | 7.203453991 | 3.818202315 | 1.312566595 | 0.785686551 | 2.222204793 |
| ENSMUSG00000086644 | -0.5152493   | 0.32045412   | 0.380305119 | 0.537439987  | 0.999071534 | Gm13470       | Gm13470       |           |  |  | 0.912340436 | 0.948640711  | 2.423527932  | 1.665170557 | 0.784830739 | 0.145524323 | 0.906014109 | 2.210638477 | 0           | 1.111102397 |
| ENSMUSG00000097312 | 0.510512094  | 1.115892411  | 0.38022972  | 0.53748032   | 0.999071534 | Gm26870       | Gm26870       |           |  |  | 1.614140771 | 1.541541155  | 2.894769475  | 2.636520049 | 0           | 0.363810808 | 0.582437641 | 3.385040167 | 4.478413341 | 1.830051006 |
| ENSMUSG00000049723 | 0.434343343  | 8.751512559  | 0.380028077 | 0.53758821   | 0.999071534 | Mmp12         | Mmp12         | MMP12     |  |  | 103.9366297 | 930.4386669  | 440.5435219  | 163.5336251 | 275.4101869 | 54.13504817 | 53.26068653 | 1479.262553 | 340.7522527 | 350.2586908 |
| ENSMUSG00000072676 | 0.272689072  | 2.342944933  | 0.379956685 | 0.5376626418 | 0.999071534 | Tmem254a      | Tmem254a      | TMEM254   |  |  | 3.298461576 | 2.3123111732 | 0.5409016526 | 7.076974868 | 5.297607489 | 3.056010784 | 6.018522294 | 6.493750525 | 4.714119306 | 5.22871716  |
| ENSMUSG00000021867 | 0.272689063  | 2.342944933  | 0.379887242 | 0.537663589  | 0.999071534 | Tmem254b      | Tmem254b      | TMEM254   |  |  | 3.298461576 | 2.3123111732 | 0.5409016526 | 7.076974868 | 5.297607489 | 3.056010784 | 6.018522294 | 6.493750525 | 4.714119306 | 5.22871716  |
| ENSMUSG00000054409 | -0.45479533  | 1.389278151  | 0.379746704 | 0.537738828  | 0.999071534 | Tmem74        | Tmem74        | TMEM74    |  |  | 3.930081878 | 4.98036373   | 1.481044848  | 0.555056852 | 4.120361381 | 3.419821592 | 4.594785837 | 1.243484143 | 0           | 1.437897219 |
| ENSMUSG00000049775 | 0.178521115  | 12.45703837  | 0.379611735 | 0.537811103  | 0.999071534 | Tmsb4x        | Tmsb4x        | TMSB4Y    |  |  | 6503.302988 | 4160.738156  | 5031.445948  | 6960.343547 | 4591.325227 | 4314.941703 | 6511.135108 | 5153.827278 | 6120.419663 | 6030.802373 |
| ENSMUSG00000024712 | 0.137805593  | 5.288338982  | 0.379421953 | 0.53791276   | 0.999071534 | Rfk           | Rfk           | RFK       |  |  | 38.87973858 | 38.89426913  | 34.80455392  | 36.91128068 | 43.16569065 | 41.32890774 | 49.31305363 | 32.95232979 | 41.01283796 | 30.32655953 |
| ENSMUSG00000001323 | -0.222030631 | 3.297408936  | 0.379386216 | 0.537931907  | 0.999071534 | Srr           | Srr           | SRR       |  |  | 8.281243958 | 15.00038123  | 9.89607239   | 9.921641237 | 11.11843547 | 7.931075606 | 4.918362304 | 12.08942917 | 5.656943167 | 12.54892118 |
| ENSMUSG00000060470 | -0.323010162 | 1.359906188  | 0.379263219 | 0.537997813  | 0.999071534 | Gpr97         | Adgrg3        | ADGRG3    |  |  | 2.666841275 | 4.328173242  | 2.760129034  | 2.844666369 | 1.373453794 | 2.40115133  | 1.229590576 | 2.348803381 | 0.942823861 | 3.660102012 |

|                     |              |              |             |             |             |               |               |          |             |             |             |             |             |             |             |             |             |             |
|---------------------|--------------|--------------|-------------|-------------|-------------|---------------|---------------|----------|-------------|-------------|-------------|-------------|-------------|-------------|-------------|-------------|-------------|-------------|
| ENSMUSG00000027341  | 0.170384867  | 5.116066547  | 0.379024443 | 0.538125801 | 0.999071534 | Tmem230       | Tmem230       | TMEM230  | 28.56327365 | 27.56987065 | 30.63070026 | 46.00033664 | 34.85956533 | 22.70179439 | 30.41618794 | 40.96589427 | 39.75573948 | 36.99317391 |
| ENSMUSG00000056091  | -0.164623898 | 4.955549412  | 0.379019628 | 0.538128382 | 0.999071534 | St3gaI5       | St3gaI5       | ST3GAL5  | 29.47561409 | 27.86632087 | 20.12874588 | 42.46184921 | 49.24812888 | 29.90524839 | 25.04481858 | 31.6397632  | 19.56359512 | 35.09776394 |
| ENSMUSG00000087113  | 0.587340476  | -0.273231698 | 0.378948303 | 0.538166625 | 0.999071534 | Gm11714       | Gm11714       |          | 1.403600671 | 1.126510844 | 0           | 0.277528426 | 0.130805123 | 0.800383777 | 0.19414588  | 1.312566595 | 1.178529826 | 0.457512752 |
| ENSMUSG00000096983  | 0.412984538  | 0.457616148  | 0.378938003 | 0.538172148 | 0.999071534 | 2010015M23Rik | 2010015M23Rik |          | 0.631620302 | 0.830060622 | 2.154247051 | 1.040731598 | 0.850233301 | 0.873145938 | 0.453007054 | 1.381649048 | 1.099961171 | 2.941153403 |
| ENSMUSG00000052137  | 0.172458594  | 4.339503822  | 0.378875499 | 0.538205665 | 0.999071534 | Rbm12b2       | Rbm12b2       | RBM12B   | 15.79050755 | 15.23754141 | 21.87907161 | 23.72868044 | 21.05962483 | 17.3901566  | 14.8845175  | 24.31702324 | 21.76351746 | 22.2874069  |
| ENSMUSG00000091742  | 0.389245277  | 0.131708924  | 0.378660299 | 0.538321095 | 0.999071534 | Gm5093        | Gm5093        | RPL11    | 1.052700503 | 0.889350666 | 0.605881983 | 1.179495811 | 0.588623054 | 0.9459081   | 1.035444696 | 0.898071881 | 1.099961171 | 1.241820326 |
| ENSMUSG00000087366  | 0.341182361  | 1.465138443  | 0.378332173 | 0.538497183 | 0.999071534 | BCD42782      | Junos         |          | 4.280982046 | 3.379532531 | 1.279084186 | 1.110113705 | 2.092881971 | 3.34705943  | 5.177223478 | 3.45412262  | 1.021392516 | 1.503256184 |
| ENSMUSG00000002550  | 0.165564143  | 4.540861201  | 0.378214654 | 0.538560276 | 0.999071534 | Uck1          | Uck1          | UCK1     | 30.45813456 | 18.91352417 | 24.03331866 | 16.44355925 | 23.93733754 | 26.19437815 | 28.47472913 | 18.23776743 | 26.47763677 | 17.38548456 |
| ENSMUSG00000005102  | 0.149774946  | 4.341911699  | 0.378062047 | 0.538642225 | 0.999071534 | Elf2ak4       | Elf2ak4       | EIF2AK4  | 18.87842902 | 18.73565403 | 18.44574037 | 21.30030671 | 21.64824789 | 21.46483765 | 16.63183042 | 21.27739534 | 18.38506529 | 23.98673997 |
| ENSMUSG00000004626  | -0.133637706 | 5.43720826   | 0.378024743 | 0.538662261 | 0.999071534 | Stxbp2        | Stxbp2        | STXBP2   | 58.03888774 | 39.36858949 | 46.45095204 | 45.93095454 | 44.86615725 | 46.42225905 | 30.02789617 | 42.62387313 | 35.12018883 | 44.50945483 |
| ENSMUSG00000046027  | -0.17256965  | 3.727835811  | 0.378001779 | 0.538674595 | 0.999071534 | Stard5        | Stard5        | STARD5   | 12.21132584 | 18.14275359 | 13.73332495 | 14.08456763 | 13.93074562 | 13.89757285 | 12.74891282 | 14.57639746 | 8.406846095 | 10.32671639 |
| ENSMUSG00000029263  | -0.228194638 | 3.441240266  | 0.377960802 | 0.538696606 | 0.999071534 | Pigg          | Pigg          | PIGG     | 13.89564664 | 13.93316044 | 10.03071283 | 7.146356975 | 15.56580966 | 11.42365936 | 17.21426807 | 8.35897674  | 3.457020824 | 8.56202435  |
| ENSMUSG00000026939  | 0.278932573  | 2.724353394  | 0.377956773 | 0.538698771 | 0.999071534 | Tmem141       | Tmem141       | TMEM141  | 10.31646493 | 4.861783641 | 3.029409915 | 7.423885401 | 4.708984435 | 9.022508029 | 13.20191987 | 3.315957715 | 3.335589479 | 6.143742663 |
| ENSMUSG00000029920  | 0.134639096  | 5.286665521  | 0.377950888 | 0.538701932 | 0.999071534 | Smarcad1      | Smarcad1      | SMARCAD1 | 30.38795452 | 39.30929944 | 42.6810197  | 42.04555657 | 37.47566779 | 45.11254014 | 45.88314308 | 34.05764903 | 37.63438579 | 33.26771293 |
| ENSMUSG00000081375  | 0.227673579  | 2.675115788  | 0.377877524 | 0.538741344 | 0.999071534 | Gm14686       | Gm14686       |          | 7.298723488 | 5.276813952 | 4.375814322 | 4.995511672 | 8.109917638 | 7.64002696  | 8.801279913 | 4.835771668 | 4.32127603  | 7.385562989 |
| ENSMUSG00000084349  | -0.368167235 | 7.813805572  | 0.377863797 | 0.538748719 | 0.999071534 | Rpl3-ps1      | Rpl3-ps1      |          | 483.6106111 | 444.1417227 | 83.74635411 | 82.07903205 | 242.2510882 | 333.8327971 | 508.0150538 | 74.12547142 | 30.24893221 | 64.37858004 |
| ENSMUSG00000032579  | 0.185879474  | 3.953017124  | 0.377475367 | 0.538957484 | 0.999071534 | Hemk1         | Hemk1         | HEMK1    | 24.91391191 | 11.68013875 | 14.06992605 | 13.59889288 | 10.46440986 | 17.17187012 | 15.33752455 | 12.22759407 | 14.61376985 | 19.28089453 |
| ENSMUSG000000043998 | 0.146319658  | 6.538251722  | 0.377319522 | 0.539041285 | 0.999071534 | Mgat2         | Mgat2         | MGAT2    | 89.19882263 | 85.8519843  | 79.57250044 | 98.38382709 | 103.9246704 | 106.8876153 | 129.0422952 | 59.82540377 | 90.43252202 | 83.65947457 |
| ENSMUSG00000000244  | -0.334577708 | 2.482467861  | 0.377312913 | 0.53904484  | 0.999071534 | Tspan32       | Tspan32       | TSPAN32  | 11.2989854  | 8.359896261 | 1.88496617  | 4.440454819 | 5.820827982 | 9.677367482 | 8.477703446 | 2.003391119 | 1.099961171 | 3.594743048 |
| ENSMUSG00000098181  | 0.333093434  | 1.343374344  | 0.377186253 | 0.539112966 | 0.999071534 | Rps12I2       | Rps12-ps24    |          | 3.509001677 | 2.253021687 | 2.154247051 | 2.150845303 | 0.981038424 | 1.600767553 | 5.177223478 | 2.694215643 | 1.728510412 | 1.633974113 |
| ENSMUSG00000052752  | 0.130838887  | 6.117807473  | 0.37717573  | 0.539118627 | 0.999071534 | Traf7         | Traf7         | TRAF7    | 78.60163757 | 74.29042564 | 70.01302916 | 48.91438512 | 73.38167411 | 105.7961829 | 73.25771222 | 57.54568284 | 52.40529295 | 68.10404101 |
| ENSMUSG00000048406  | -0.379165507 | 1.372489421  | 0.376549165 | 0.539455876 | 0.999071534 | B330016D10Rik | B330016D10Rik |          | 1.403600671 | 1.126510844 | 4.779735644 | 4.02416218  | 2.943115272 | 0.873145938 | 0.776583522 | 4.006782239 | 1.335667137 | 3.071871332 |
| ENSMUSG00000031847  | 0.579686063  | 0.080350915  | 0.376486032 | 0.539489878 | 0.999071534 | 1700030J22Rik | 1700030J22Rik | C16orf46 | 1.473780704 | 1.897281421 | 0           | 0           | 0.523220493 | 1.964578361 | 1.164875283 | 0.759906976 | 0.942823861 | 0.653589645 |
| ENSMUSG00000020806  | -0.160283737 | 4.682883758  | 0.376466177 | 0.539500573 | 0.999071534 | Rhbf2         | Rhbf2         | RHBDF2   | 30.24759446 | 35.81118682 | 28.88037453 | 19.35760773 | 26.35723232 | 34.99859969 | 16.76126101 | 27.2875687  | 12.88525944 | 27.71220095 |
| ENSMUSG00000003762  | -0.182261753 | 4.233071305  | 0.375959508 | 0.539773612 | 0.999071534 | Adck4         | Adck4         | ADCK4    | 30.10723439 | 26.97697021 | 13.93528561 | 17.41490874 | 14.97718661 | 21.90141062 | 19.22044216 | 17.47786046 | 8.249708785 | 19.60768935 |
| ENSMUSG000000028184 | -0.146407909 | 6.265817386  | 0.375814259 | 0.539851931 | 0.999071534 | Lphn2         | Adgrl2        | ADGRL2   | 59.86356861 | 89.46867701 | 73.44636039 | 89.78044587 | 105.9521498 | 70.50653452 | 63.93870996 | 96.6463509  | 48.00544826 | 73.33275817 |
| ENSMUSG00000097048  | 0.220793735  | 3.568219592  | 0.375724312 | 0.539900442 | 0.999071534 | 1600020E01Rik | 1600020E01Rik |          | 10.0357448  | 9.427117061 | 15.07972936 | 10.75422652 | 10.85682522 | 6.839643183 | 7.636404631 | 13.19474841 | 14.77090716 | 16.14366423 |
| ENSMUSG00000035828  | 0.133536692  | 5.130891824  | 0.375709642 | 0.539908355 | 0.999071534 | Pim3          | Pim3          | PIM3     | 38.80955855 | 35.75189678 | 39.92089066 | 25.94890785 | 32.96289104 | 47.73197796 | 29.51017383 | 39.23883296 | 25.84908753 | 36.33958426 |
| ENSMUSG00000054939  | -0.51157643  | 0.133491136  | 0.37559143  | 0.539972124 | 0.999071534 | Zfp174        | Zfp174        | ZNF174   | 0.561440268 | 1.304380977 | 2.490848153 | 0           | 1.569661478 | 0.509335131 | 0.388291761 | 0.898071881 | 0.864255206 | 1.045743432 |
| ENSMUSG00000059776  | -0.276562683 | 2.304119596  | 0.375503322 | 0.540019662 | 0.999071534 | Gm10071       | Rpl13-ps6     |          | 5.614402683 | 6.344034752 | 5.99149961  | 6.591300122 | 2.616102464 | 3.056010784 | 3.753487022 | 6.35558562  | 1.807079067 | 6.013024734 |
| ENSMUSG000000052310 | -0.149144373 | 7.328764693  | 0.375482147 | 0.540031088 | 0.999071534 | Slc39a1       | Slc39a1       | SLC39A1  | 204.5046177 | 173.3047998 | 157.2600347 | 169.7086326 | 172.7935677 | 194.4204956 | 192.6574287 | 131.1875771 | 113.9245499 | 112.4174189 |
| ENSMUSG00000020280  | 0.156755029  | 4.716273325  | 0.374958793 | 0.540313631 | 0.999071534 | Pus10         | Pus10         | PUS10    | 25.89643238 | 21.99660648 | 27.93789144 | 30.38936267 | 21.64824789 | 37.18146454 | 31.7104938  | 15.19813953 | 20.74212495 | 30.52263642 |
| ENSMUSG00000030468  | 0.271921075  | 3.107747771  | 0.37490318  | 0.540343671 | 0.999071534 | Siglecg       | Siglecg       | SIGLEC10 | 3.36864161  | 6.759065062 | 13.19476319 | 8.187088573 | 8.240722761 | 8.440410737 | 2.912188207 | 11.32952219 | 10.05678785 | 11.11102397 |
| ENSMUSG00000043445  | 0.1475525    | 4.996619627  | 0.374735033 | 0.540434515 | 0.999071534 | Pgp           | Pgp           | PGP      | 43.58180083 | 25.25755892 | 31.84246422 | 26.5039647  | 29.88897065 | 43.51177259 | 39.15275255 | 20.37932346 | 26.47763677 | 33.85594361 |
| ENSMUSG00000093956  | -1.260040806 | -0.919764454 | 0.374534071 | 0.540543125 | 0.999071534 | Gm24497       | Gm24497       |          | 2.947561409 | 0           | 0           | 0           | 0           | 0           | 1.100159989 | 0           | 0           | 0           |
| ENSMUSG00000066152  | -0.214719618 | 3.433343741  | 0.37428269  | 0.54067904  | 0.999071534 | Slc31a2       | Slc31a2       | SLC31A2  | 16.84320805 | 14.34819075 | 6.597381593 | 12.28063286 | 9.483371431 | 11.56918368 | 14.30207986 | 9.740625788 | 5.106962581 | 7.843075741 |
| ENSMUSG00000002409  | -0.349184137 | 0.602670622  | 0.374077739 | 0.540789898 | 0.999071534 | Dyrk1b        | Dyrk1b        | DYRK1B   | 1.263240604 | 1.422961066 | 1.750325729 | 1.526406344 | 2.092881971 | 1.600767553 | 0.582437641 | 1.243484143 | 1.492804447 | 0.915025503 |
| ENSMUSG00000047832  | 0.163064936  | 5.166062713  | 0.373908303 | 0.540881577 | 0.999071534 | Cdca4         | Cdca4         | CDC44    | 52.56484512 | 29.70431225 | 33.66011017 | 31.29133005 | 28.38471173 | 62.35717242 | 47.69517129 | 22.31363212 | 26.00622484 | 29.86904678 |
| ENSMUSG00000025558  | 0.158375017  | 6.877442361  | 0.373843829 | 0.540916471 | 0.999071534 | Dock9         | Dock9         | DOCK9    | 92.21656407 | 105.0026686 | 112.9633297 | 125.7897592 | 139.1766511 | 124.9326313 | 73.51657339 | 126.1445581 | 137.5737151 | 124.4434684 |

|                     |              |              |             |             |             |               |               |          |             |             |             |             |             |             |             |             |             |             |
|---------------------|--------------|--------------|-------------|-------------|-------------|---------------|---------------|----------|-------------|-------------|-------------|-------------|-------------|-------------|-------------|-------------|-------------|-------------|
| ENSMUSG00000005397  | -0.209251115 | 4.823992848  | 0.373822239 | 0.540928157 | 0.999071534 | Nid1          | Nid1          | NID1     | 18.59770889 | 54.84329108 | 30.49605981 | 18.52502245 | 35.38278582 | 44.23939421 | 39.41161373 | 16.37254122 | 11.47102364 | 20.58807382 |
| ENSMUSG000000063904 | -0.158034496 | 5.839989494  | 0.373671443 | 0.541009787 | 0.999071534 | Dpp3          | 4930533O14Rik | DPP3     | 82.88261961 | 70.19941258 | 47.46075534 | 53.21607572 | 60.30116179 | 95.6822424  | 60.37936882 | 30.1890317  | 30.24893221 | 55.55511983 |
| ENSMUSG000000022941 | -0.49211588  | -0.192125714 | 0.373121657 | 0.541307595 | 0.999071534 | Ripply3       | Ripply3       | RIPPLY3  | 1.894860906 | 0.830060622 | 0.942483085 | 0.416292639 | 0.457817931 | 1.018670261 | 0.841298815 | 0.27632981  | 0.785686551 | 0.065358965 |
| ENSMUSG000000098620 | 0.467609776  | 0.66696227   | 0.373074726 | 0.541333031 | 0.999071534 | RP23-432N1.6  | Gm27209       |          | 0.842160403 | 0.355740266 | 0.329409915 | 0.485674746 | 1.700466601 | 0.654859454 | 0.19414588  | 2.072473572 | 2.199922343 | 2.679717545 |
| ENSMUSG000000086775 | -0.54283772  | -0.256652091 | 0.373020775 | 0.541362274 | 0.999071534 | 5730588L14Rik | Snhg7os       |          | 1.122880537 | 0.770770577 | 0.134640441 | 1.457024238 | 0.784830739 | 0.582097292 | 0.388291761 | 0.345412262 | 0           | 1.503256184 |
| ENSMUSG00000015748  | 0.131913557  | 5.432997991  | 0.37269444  | 0.541539218 | 0.999071534 | Prpf3         | Prpf3         | PRPF3    | 32.70389563 | 39.42787953 | 43.42154212 | 46.83292192 | 50.49077755 | 54.35333466 | 40.25291254 | 47.11423253 | 37.87009176 | 38.49643009 |
| ENSMUSG000000058351 | 0.204715985  | 3.757624143  | 0.37256691  | 0.541608396 | 0.999071534 | Smim4         | Smim4         | SMIM4    | 14.66762701 | 7.826285862 | 11.84835878 | 17.83120138 | 12.03407133 | 8.658697221 | 13.65492692 | 15.40538688 | 11.07818037 | 19.28089453 |
| ENSMUSG000000021619 | 0.226039017  | 2.737093292  | 0.372566133 | 0.541608818 | 0.999071534 | Atg10         | Atg10         | ATG10    | 8.211063924 | 5.632554219 | 5.318297407 | 5.82809695  | 6.344048475 | 5.74821076  | 6.795105815 | 10.29328541 | 5.185531236 | 5.686229912 |
| ENSMUSG000000027854 | 0.129535623  | 5.626961601  | 0.372534425 | 0.54162602  | 0.999071534 | Sike1         | Sike1         | SIKE1    | 55.79312667 | 48.02493597 | 44.63330609 | 43.57196291 | 52.91067233 | 55.37200492 | 67.56276639 | 50.91376741 | 36.53442462 | 39.67289145 |
| ENSMUSG000000033684 | -0.151325563 | 6.882643147  | 0.372424612 | 0.541685604 | 0.999071534 | Qsox1         | Qsox1         | QSOX1    | 136.5703453 | 168.0279858 | 107.0391503 | 110.1094031 | 123.8724517 | 167.4984958 | 134.5430951 | 107.9067906 | 58.53364805 | 87.97316622 |
| ENSMUSG000000008348 | -0.172180303 | 10.38719221  | 0.372310338 | 0.541747621 | 0.999071534 | Ubc           | Ubc           |          | 1494.132914 | 1766.961903 | 1371.582169 | 1090.131658 | 1677.641107 | 1247.725546 | 867.5732244 | 1787.439373 | 869.3621687 | 1303.584547 |
| ENSMUSG000000050954 | -0.375649584 | 0.810681502  | 0.372182265 | 0.541817143 | 0.999071534 | Zfp169        | Zfp169        | ZNF337   | 3.438821644 | 2.371601776 | 0.673202203 | 0.763203172 | 2.354492217 | 1.600767553 | 0.647152935 | 1.796143762 | 0.785686551 | 2.0261279   |
| ENSMUSG000000016984 | 0.183134028  | 3.779906639  | 0.372180969 | 0.541817847 | 0.999071534 | Etaa1         | Etaa1         | ETAA1    | 17.47482835 | 9.367827016 | 12.5888812  | 15.26406344 | 11.31464316 | 19.50025929 | 17.73199041 | 9.947873145 | 9.506807267 | 14.57504908 |
| ENSMUSG000000019813 | 0.189872132  | 3.586498703  | 0.371995105 | 0.541918769 | 0.999071534 | Cep57l1       | Cep57l1       | CEP57L1  | 10.6673651  | 11.6208487  | 12.45424076 | 9.227820171 | 13.7999405  | 12.2968053  | 14.8845175  | 7.046410144 | 12.49241616 | 13.85610048 |
| ENSMUSG000000028641 | -0.14707157  | 5.256547554  | 0.371927845 | 0.541955298 | 0.999071534 | Lepre1        | P3h1          | P3H1     | 57.05636727 | 47.19487535 | 32.24638554 | 36.84189858 | 35.05577302 | 51.37008603 | 46.6597266  | 26.87307398 | 23.25632191 | 30.58799539 |
| ENSMUSG000000034566 | -0.177461762 | 8.484027357  | 0.371822031 | 0.542012777 | 0.999071534 | Atp5h         | Atp5h         | ATP5H    | 511.0510043 | 257.9709832 | 411.9997485 | 469.2311866 | 314.1285033 | 269.1472355 | 404.6647301 | 266.312854  | 306.9677355 | 351.5658701 |
| ENSMUSG000000005354 | -0.139109333 | 6.967098014  | 0.371787518 | 0.542031527 | 0.999071534 | Txn2          | Txn2          | TXN2     | 147.5886105 | 125.517024  | 133.2267161 | 129.2588645 | 145.0628816 | 161.3864743 | 146.4507091 | 89.46177585 | 81.00428341 | 107.3847787 |
| ENSMUSG000000037236 | 0.152938602  | 7.767322613  | 0.37171011  | 0.542073584 | 0.999071534 | Matr3         | Matr3         | MATR3    | 167.6601001 | 230.6382727 | 181.495314  | 209.6033439 | 214.4549995 | 196.8216469 | 204.1120356 | 221.271095  | 197.3644616 | 206.9264816 |
| ENSMUSG000000097842 | -0.47916818  | 0.49143977   | 0.371488781 | 0.542193871 | 0.999071534 | 9330104G04Rik | 9330104G04Rik |          | 0.842160403 | 1.956571465 | 0           | 3.122194795 | 1.63506404  | 1.528005392 | 0.711868228 | 1.4507315   | 0.392843275 | 1.176461361 |
| ENSMUSG000000004771 | 0.142806652  | 7.068592377  | 0.371363643 | 0.542261903 | 0.999071534 | Rab11a        | Rab11a        | RAB11A   | 137.2019656 | 121.1888508 | 141.5071032 | 134.3237583 | 126.7501644 | 127.1154962 | 168.6480548 | 135.8161014 | 119.5029244 | 122.8094943 |
| ENSMUSG000000039058 | -0.213921261 | 3.431108298  | 0.371269418 | 0.542313138 | 0.999071534 | Ak5           | Ak5           | AK5      | 12.7727661  | 11.97658897 | 13.66600473 | 8.950291745 | 12.23027902 | 21.173789   | 10.74273872 | 6.562832977 | 5.342668547 | 6.470537486 |
| ENSMUSG000000066861 | 0.22979549   | 2.950778142  | 0.371262039 | 0.542317151 | 0.999071534 | Oas1g         | Oas1g         | OAS1     | 8.421604025 | 7.351965506 | 10.09803305 | 5.342422204 | 5.166802366 | 8.076599929 | 5.241938772 | 7.875399573 | 5.735511822 | 12.74499808 |
| ENSMUSG000000098912 | -0.298780368 | 1.848583338  | 0.371178409 | 0.542362634 | 0.999071534 | RP23-199B2.4  | 1500004A13Rik |          | 2.456301174 | 1.660121243 | 5.654898509 | 5.481186417 | 4.447374189 | 3.565345915 | 1.617882337 | 3.661369977 | 2.357059653 | 3.856178906 |
| ENSMUSG000000079523 | 0.194186442  | 9.61484825   | 0.370940295 | 0.542492172 | 0.999071534 | Tmsb10        | Tmsb10        | TMSB10   | 587.898141  | 553.4725645 | 993.579132  | 914.3174001 | 724.5295774 | 527.0890981 | 573.765792  | 990.9877796 | 879.3403879 | 938.6200893 |
| ENSMUSG000000071757 | -0.22242745  | 3.352078898  | 0.370916101 | 0.542505338 | 0.999071534 | Zhx2          | Zhx2          | ZHX2     | 17.19410822 | 12.27303919 | 7.943786    | 7.215739081 | 12.16487646 | 18.04501606 | 9.836724609 | 8.842553906 | 4.714119306 | 5.620870947 |
| ENSMUSG000000096472 | -0.184251817 | 4.31268044   | 0.370859702 | 0.542536029 | 0.999071534 | Cdkn2d        | Cdkn2d        | CDKN2D   | 25.26481208 | 19.92145492 | 20.86926831 | 17.27614453 | 26.16102464 | 20.88274036 | 27.95700678 | 20.51748836 | 6.206923753 | 15.94758734 |
| ENSMUSG000000074158 | -0.493031751 | -0.211754415 | 0.370762437 | 0.542588968 | 0.999071534 | 9830147E19Rik | 9830147E19Rik | ZNF788   | 0.842160403 | 0.770770577 | 1.481044848 | 0.277528426 | 1.046440986 | 1.164194584 | 0.776583522 | 0.345412262 | 0           | 0.784307574 |
| ENSMUSG000000022217 | -0.223232701 | 3.101973388  | 0.370739466 | 0.542601471 | 0.999071534 | Emc9          | Emc9          | EMC9     | 10.17610486 | 9.189956883 | 7.87646578  | 10.33793388 | 9.614176555 | 4.29296753  | 6.277383467 | 8.35897674  | 6.521198373 | 11.37245982 |
| ENSMUSG000000073876 | -0.491462167 | -0.413711687 | 0.37063008  | 0.542661021 | 0.999071534 | Gm13305       | Gm13305       | IL11RA   | 0.631620302 | 1.304380977 | 1.144443746 | 0.069382107 | 0.588623054 | 0.509335131 | 0.711868228 | 0.552659619 | 0.235705965 | 0.457512752 |
| ENSMUSG000000021338 | -0.29258476  | 2.376343115  | 0.370469392 | 0.54274852  | 0.999071534 | Lrrc16a       | Lrrc16a       | LRRC16A  | 3.298461576 | 9.427117061 | 3.029409915 | 8.256470679 | 4.643581873 | 9.09527019  | 3.624056435 | 3.799534882 | 1.414235792 | 5.294076125 |
| ENSMUSG000000043162 | -0.187931873 | 3.63631088   | 0.370231416 | 0.542878154 | 0.999071534 | Pyurf         | Pyurf         | PYURF    | 16.49230788 | 10.07930755 | 12.72352164 | 14.8477708  | 13.7999405  | 12.22404314 | 17.21426807 | 9.53337843  | 8.406466095 | 8.431306421 |
| ENSMUSG000000074829 | 0.191295633  | 3.486269248  | 0.370168428 | 0.542912475 | 0.999071534 | 2010315B03Rik | 2010315B03Rik | ZNF788   | 11.15862533 | 8.182026128 | 10.56927459 | 10.40731598 | 13.40752513 | 9.531843159 | 12.03704459 | 9.53337843  | 11.86386692 | 13.00643394 |
| ENSMUSG000000033792 | -0.482258867 | 3.188401642  | 0.370084495 | 0.542958215 | 0.999071534 | Atp7a         | Atp7a         | ATP7A    | 9.263764428 | 32.13520407 | 3.366011017 | 1.734552664 | 8.502333007 | 17.82672957 | 13.97850339 | 6.286503168 | 0.078568655 | 1.30717929  |
| ENSMUSG000000035235 | 0.23438935   | 2.719566469  | 0.370031416 | 0.542987144 | 0.999071534 | Trim13        | Trim13        | TRIM13   | 5.333682549 | 5.691844263 | 5.116336746 | 7.007592761 | 7.586697145 | 4.511254014 | 6.471529348 | 9.947873145 | 4.478413341 | 7.908434705 |
| ENSMUSG000000095101 | -0.908182848 | -0.886296373 | 0.370001858 | 0.543003255 | 0.999071534 | Gm13285       | Gm13285       |          | 0.561440268 | 1.245090933 | 0           | 0.901967385 | 0           | 0           | 0           | 1.174401691 | 0           | 0.130717929 |
| ENSMUSG000000026072 | 0.16038349   | 4.273810788  | 0.369701294 | 0.543167133 | 0.999071534 | Il1r1         | Il1r1         | IL1R1    | 22.73833087 | 22.70808701 | 20.86926831 | 11.23990126 | 17.2008737  | 21.68312413 | 23.42693624 | 20.03391119 | 12.96382809 | 20.65343278 |
| ENSMUSG000000053716 | 0.136470786  | 5.334995787  | 0.369700034 | 0.54316782  | 0.999071534 | Dusp7         | Dusp7         | DUSP7    | 42.38874026 | 37.58988815 | 35.0738348  | 35.45425645 | 49.0519212  | 67.45052373 | 32.81065379 | 35.57746298 | 26.9490487  | 46.66630066 |
| ENSMUSG000000039660 | -0.166354562 | 4.167502643  | 0.369165789 | 0.543459336 | 0.999071534 | D2Wsu81e      | D2Wsu81e      | C9orf114 | 27.65093322 | 18.79494408 | 17.30129663 | 16.30479504 | 18.24731469 | 25.24847005 | 18.44385864 | 11.32952219 | 10.21392516 | 18.2351511  |
| ENSMUSG000000041879 | -0.163898202 | 6.15501761   | 0.368960644 | 0.543571352 | 0.999071534 | Ipo9          | Ipo9          | IPO9     | 80.77721861 | 93.26323985 | 73.31171995 | 57.86467686 | 86.78919924 | 143.0504096 | 61.47952881 | 50.84468496 | 32.68456052 | 55.03224811 |

|                     |              |              |             |             |             |               |               |           |             |             |             |             |             |             |             |             |             |             |
|---------------------|--------------|--------------|-------------|-------------|-------------|---------------|---------------|-----------|-------------|-------------|-------------|-------------|-------------|-------------|-------------|-------------|-------------|-------------|
| ENSMUSG00000015869  | -0.134111714 | 6.109788337  | 0.368897368 | 0.543605911 | 0.999071534 | Prpsap1       | Prpsap1       | PRPSAP1   | 91.0235035  | 56.7405725  | 79.37053978 | 68.8270497  | 79.00629441 | 88.18773976 | 74.87559456 | 45.52533613 | 50.9124885  | 62.4178111  |
| ENSMUSG000000022536 | 0.12817972   | 6.280440673  | 0.368889852 | 0.543610017 | 0.999071534 | Glyr1         | Glyr1         | GLYR1     | 83.30369981 | 79.09291924 | 79.63982066 | 78.74869093 | 63.57128987 | 103.5405558 | 71.12210753 | 70.6713488  | 76.13302679 | 70.5223227  |
| ENSMUSG000000024338 | -0.16074447  | 8.752398533  | 0.368864999 | 0.543623592 | 0.999071534 | Psmb8         | Psmb8         | PSMB8     | 549.6500227 | 349.9298421 | 504.9689728 | 509.1258979 | 444.3450035 | 438.5375475 | 306.4916299 | 388.0361351 | 365.2656776 | 458.0356233 |
| ENSMUSG000000060477 | -0.194908411 | 4.429177095  | 0.368801052 | 0.543658524 | 0.999071534 | Irak2         | Irak2         | IRAK2     | 21.9663505  | 32.8466846  | 20.80194809 | 13.94580342 | 29.95437321 | 19.71854577 | 19.41458804 | 33.57407186 | 8.32827744  | 16.47045906 |
| ENSMUSG000000002983 | -0.14803025  | 4.776511845  | 0.368783967 | 0.543667858 | 0.999071534 | Relb          | Relb          | RELB      | 29.19489395 | 34.32893571 | 30.29409915 | 24.70002993 | 30.67380139 | 39.80090235 | 17.60255983 | 30.3271966  | 17.12796681 | 23.00635551 |
| ENSMUSG000000021408 | -0.213004459 | 5.099397764  | 0.368538417 | 0.543802036 | 0.999071534 | Ripk1         | Ripk1         | RIPK1     | 40.98513959 | 58.10424352 | 22.35031315 | 30.94441952 | 38.78371903 | 54.13504817 | 42.12965606 | 29.36004227 | 6.521198373 | 29.21545713 |
| ENSMUSG000000032548 | -0.132100858 | 6.161300975  | 0.368457354 | 0.543846345 | 0.999071534 | Slc2a1        | Slc2a1        | SLC2A1    | 81.54919898 | 74.82403604 | 84.55419675 | 82.07903205 | 63.89830268 | 98.88377751 | 54.36084652 | 52.98624099 | 58.21937343 | 69.08442548 |
| ENSMUSG000000039828 | 0.187137503  | 5.696042826  | 0.368393588 | 0.543881205 | 0.999071534 | Wdr70         | Wdr70         | WDR70     | 40.98513959 | 37.47130807 | 67.05093946 | 58.2809695  | 45.91259824 | 43.65729691 | 25.95083269 | 55.95678644 | 76.68300738 | 52.35253057 |
| ENSMUSG000000025265 | -0.149296261 | 4.810181781  | 0.368325708 | 0.543918318 | 0.999071534 | Fgd1          | Fgd1          | FGD1      | 24.42265167 | 29.88218238 | 34.06403149 | 22.41042042 | 42.31545735 | 38.49118345 | 20.8383245  | 28.53105284 | 18.77790857 | 23.59458619 |
| ENSMUSG000000019256 | 0.160728728  | 4.744119849  | 0.368178975 | 0.54399856  | 0.999071534 | Ahr           | Ahr           | AHR       | 26.73859278 | 20.39577528 | 26.99540836 | 24.83879414 | 31.8510475  | 25.75780518 | 16.76126101 | 26.66582662 | 30.24893221 | 33.79058465 |
| ENSMUSG000000050240 | 0.287732761  | 2.206884637  | 0.368151767 | 0.544013441 | 0.999071534 | Hic2          | Hic2          | HIC2      | 4.631882214 | 4.565333419 | 4.173853661 | 2.150845303 | 5.624620297 | 3.34705943  | 1.941458804 | 8.773471454 | 4.399844685 | 4.771204409 |
| ENSMUSG000000038067 | 0.245879861  | 2.457295944  | 0.368150611 | 0.544014074 | 0.999071534 | Csf3          | Csf3          | CSF3      | 4.842422314 | 6.106874574 | 7.068623136 | 3.677251647 | 3.793348573 | 4.438491853 | 4.27120937  | 8.289894287 | 4.399844685 | 6.339819557 |
| ENSMUSG000000036768 | 0.205102096  | 4.433358249  | 0.367962544 | 0.544116956 | 0.999071534 | Klf15         | Klf15         | KLF15     | 29.68615419 | 13.28096995 | 17.70521795 | 22.06350988 | 20.86341715 | 49.04169687 | 29.51017383 | 12.36575898 | 11.39245499 | 15.42471562 |
| ENSMUSG000000051703 | -0.488493834 | 0.026509185  | 0.367948459 | 0.544124663 | 0.999071534 | Tmem198       | Tmem198       | TMEM198   | 1.403600671 | 0.474320355 | 0.538561763 | 2.081463196 | 0.784830739 | 0.654859454 | 1.229590576 | 0.759906976 | 0           | 0.980384468 |
| ENSMUSG000000020515 | -0.12774822  | 5.93850029   | 0.367936085 | 0.544131434 | 0.999071534 | Cnot8         | Cnot8         | CNOT8     | 86.32144126 | 63.20318734 | 58.29931082 | 61.68069272 | 62.78645913 | 61.04745352 | 69.82780166 | 53.19348834 | 44.07701551 | 54.96688915 |
| ENSMUSG000000023079 | -0.168723897 | 4.561029348  | 0.367896421 | 0.544153138 | 0.999071534 | Gtf2ird1      | Gtf2ird1      | GTTF2IRD1 | 24.70337181 | 29.34857198 | 29.08233519 | 14.36209606 | 32.37426799 | 27.94067002 | 15.14337867 | 30.1890317  | 14.92804447 | 19.67304832 |
| ENSMUSG000000046756 | 0.147110724  | 5.578009597  | 0.367807697 | 0.544201693 | 0.999071534 | Mrps7         | Mrps7         | MRPS7     | 57.82834764 | 35.39615651 | 43.42154212 | 44.82084083 | 53.63010051 | 52.31599413 | 76.62290748 | 33.91948413 | 35.59160076 | 44.96696758 |
| ENSMUSG000000030609 | 0.176939893  | 5.069593411  | 0.367667738 | 0.544278304 | 0.999071534 | Aen           | Aen           | AEN       | 37.12523774 | 30.65295296 | 33.99671127 | 31.7770048  | 29.43115272 | 62.13888594 | 46.20671954 | 13.19474841 | 28.12757853 | 27.18932923 |
| ENSMUSG000000038451 | -0.166993617 | 4.382829323  | 0.367403329 | 0.54442309  | 0.999071534 | Spsb2         | Spsb2         | SPSB2     | 23.51031124 | 22.11518656 | 17.57057751 | 21.99412778 | 28.84252966 | 17.89949173 | 12.9430587  | 23.76436362 | 12.88525944 | 26.73181648 |
| ENSMUSG000000014551 | 0.154681525  | 5.411313818  | 0.367325765 | 0.544465576 | 0.999071534 | Mrps25        | Mrps25        | MRPS25    | 47.23116257 | 31.60159367 | 47.662716   | 38.43768703 | 43.68891115 | 52.17046981 | 66.98032875 | 24.31702324 | 34.72734555 | 39.60753249 |
| ENSMUSG000000021608 | 0.217704886  | 5.353996543  | 0.367263544 | 0.544499662 | 0.999071534 | Lpcat1        | Lpcat1        | LPCAT1    | 63.51293036 | 43.93392291 | 23.831358   | 32.74835429 | 32.57047567 | 82.51229117 | 73.64600398 | 17.408778   | 24.12057712 | 24.57497065 |
| ENSMUSG000000022902 | -0.435184193 | 0.350946118  | 0.3671279   | 0.544573986 | 0.999071534 | Stfa2         | Stfa2         | CSTA      | 1.965040939 | 1.126510844 | 1.683005509 | 1.248877918 | 0.784830739 | 0.218286485 | 0.711868228 | 2.417885834 | 0.31427462  | 0.915025503 |
| ENSMUSG000000045948 | -0.204449457 | 3.729491084  | 0.367092057 | 0.544593629 | 0.999071534 | Mrps12        | Mrps12        | MRPS12    | 23.36995117 | 12.27303919 | 12.11763966 | 8.811527532 | 17.07006858 | 18.84539983 | 17.34369865 | 9.602460883 | 6.206923753 | 8.954178137 |
| ENSMUSG000000038235 | 0.229282934  | 5.053139853  | 0.366843357 | 0.544729957 | 0.999071534 | F11r          | F11r          | F11R      | 33.475876   | 49.03286672 | 28.1398521  | 22.47980252 | 25.57240158 | 28.01343219 | 44.58883721 | 70.87859616 | 9.585375922 | 20.98022761 |
| ENSMUSG000000052485 | 0.203459956  | 3.440486709  | 0.366430929 | 0.544956174 | 0.999071534 | Tmem171       | Tmem171       | TMEM171   | 9.544484562 | 7.470545595 | 13.66600473 | 10.26855177 | 10.7260201  | 11.3508972  | 13.59021163 | 14.64547991 | 9.192532646 | 6.405178521 |
| ENSMUSG000000043067 | -0.133975583 | 6.07280033   | 0.366169289 | 0.545099774 | 0.999071534 | Dpy19l1       | Dpy19l1       | DPY19L1   | 54.17988589 | 72.39314422 | 69.20518651 | 93.45769752 | 73.5778818  | 74.14464259 | 61.41481351 | 65.76649468 | 53.42668547 | 55.03224811 |
| ENSMUSG000000034880 | -0.165641557 | 5.399243363  | 0.366077185 | 0.545150342 | 0.999071534 | Mrpl34        | Mrpl34        | MRPL34    | 57.96870771 | 33.9139054  | 42.47905904 | 45.93095454 | 50.88319292 | 53.98952385 | 59.47335471 | 25.8368372  | 16.73512354 | 41.96045521 |
| ENSMUSG000000006423 | -0.127466104 | 5.623056036  | 0.366002581 | 0.545191308 | 0.999071534 | C330007P06Rik | C330007P06Rik | CXorf56   | 53.96844579 | 58.04495347 | 50.75944614 | 44.68207662 | 59.64713618 | 51.66113468 | 55.65515239 | 41.9330486  | 42.66277972 | 34.2480974  |
| ENSMUSG000000034168 | 0.154020465  | 6.438157025  | 0.365914063 | 0.545239921 | 0.999071534 | Irf2bpl       | Irf2bpl       | IRF2BPL   | 65.82887146 | 75.71338671 | 103.1345776 | 87.42145425 | 92.4792221  | 89.0608857  | 52.28995713 | 110.8773361 | 89.72540412 | 91.63326824 |
| ENSMUSG000000034290 | -0.139412411 | 6.206221264  | 0.365805383 | 0.545299619 | 0.999071534 | Nek9          | Nek9          | NEK9      | 93.54998471 | 93.14465976 | 57.35682773 | 79.72004042 | 77.69824318 | 112.4903017 | 62.12668174 | 54.43697249 | 44.70556475 | 75.29352711 |
| ENSMUSG000000050069 | 0.646793184  | -0.151663548 | 0.365730395 | 0.545340817 | 0.999071534 | Grem2         | Grem2         | GREM2     | 0.561440268 | 0.889350666 | 0.538561763 | 0.346910533 | 0.719428178 | 2.692199976 | 2.200319978 | 0.069082452 | 0           | 0           |
| ENSMUSG000000030846 | 0.129313558  | 6.483795175  | 0.365606512 | 0.54540889  | 0.999071534 | Tial1         | Tial1         | TIAL1     | 92.84818438 | 68.48000129 | 98.48948236 | 91.37623433 | 91.43278111 | 100.7028315 | 101.7324413 | 96.57726845 | 65.21198373 | 89.14962758 |
| ENSMUSG000000096699 | 0.412207662  | 0.799661906  | 0.3655446   | 0.545442916 | 0.999071534 | Rps19-ps4     | Rps19-ps4     |           | 1.052700503 | 2.430891821 | 0.134640441 | 1.734552664 | 1.831271725 | 1.600767553 | 1.68259763  | 1.865226215 | 2.828471584 | 0.588230681 |
| ENSMUSG000000043740 | -0.299307011 | 2.436291197  | 0.365473279 | 0.545482118 | 0.999071534 | B430306N03Rik | B430306N03Rik |           | 6.947823321 | 11.26510844 | 3.096730136 | 3.607869541 | 5.493815174 | 9.386318836 | 5.177223478 | 4.421276953 | 0.864255206 | 4.444409586 |
| ENSMUSG000000021190 | -0.187793587 | 8.741507091  | 0.365324802 | 0.545563746 | 0.999071534 | Lgmn          | Lgmn          | LGMN      | 526.4906116 | 604.9363231 | 332.7638491 | 454.3834158 | 450.1658315 | 636.7416755 | 611.688954  | 286.2776827 | 193.3574602 | 281.1742653 |
| ENSMUSG000000041351 | 0.194856862  | 3.402549689  | 0.365260855 | 0.545598909 | 0.999071534 | Rap1gap       | Rap1gap       | RAP1GAP   | 12.84294614 | 11.32439848 | 7.135943356 | 6.313771696 | 13.34212257 | 11.86023233 | 10.48387754 | 10.70778012 | 9.113963991 | 11.63389568 |
| ENSMUSG000000033272 | -0.142984917 | 5.43910181   | 0.365247129 | 0.545606457 | 0.999071534 | Slc35a4       | Slc35a4       | SLC35A4   | 43.79234093 | 42.80741206 | 47.86467666 | 49.46944197 | 51.47181598 | 75.89093447 | 32.48707733 | 34.05764903 | 24.04200846 | 40.3264811  |
| ENSMUSG000000042073 | 0.214409141  | 3.037435276  | 0.365201325 | 0.545631647 | 0.999071534 | Abhd14b       | Abhd14b       | ABHD14B   | 7.789983723 | 6.403324796 | 9.694111729 | 6.730064335 | 8.240722761 | 6.039259406 | 6.665675228 | 10.29328541 | 8.17114013  | 9.803844676 |
| ENSMUSG000000033502 | 0.172524111  | 3.787636004  | 0.36490918  | 0.545792363 | 0.999071534 | Cdc14a        | Cdc14a        | CDC14A    | 14.31672684 | 9.664277238 | 16.02221244 | 12.41939707 | 14.38856355 | 18.19054038 | 13.97850339 | 10.77686257 | 10.21392516 | 17.77763835 |

|                     |              |             |             |             |             |               |            |         |             |             |             |             |             |             |             |             |             |             |
|---------------------|--------------|-------------|-------------|-------------|-------------|---------------|------------|---------|-------------|-------------|-------------|-------------|-------------|-------------|-------------|-------------|-------------|-------------|
| ENSMUSG00000038080  | -0.140516949 | 4.581181753 | 0.36489902  | 0.545797954 | 0.999071534 | Kdm1b         | Kdm1b      | KDM1B   | 24.28229161 | 21.70015625 | 25.85096461 | 26.92025734 | 30.73920395 | 24.15703763 | 23.42693624 | 22.24454967 | 17.52081009 | 22.15668897 |
| ENSMUSG000000085396 | 0.176671094  | 4.195849159 | 0.364608895 | 0.545957648 | 0.999071534 | 6720401G13Rik | Fire       |         | 22.3874307  | 14.8225111  | 14.13724627 | 15.95788451 | 21.64824789 | 16.95358363 | 11.32517636 | 24.73151796 | 15.87086833 | 23.33315033 |
| ENSMUSG00000048087  | 0.160124403  | 6.643098096 | 0.364485219 | 0.54602575  | 0.999071534 | Gm4737        | Gm4737     | AHCY    | 120.8500178 | 102.6310669 | 72.43655709 | 77.43043091 | 118.7056493 | 157.5300797 | 155.1872738 | 79.79023251 | 57.7479615  | 74.90137332 |
| ENSMUSG000000098149 | -0.346115427 | 1.006697787 | 0.364259588 | 0.546150034 | 0.999071534 | Gm2193        | Gapdh-ps14 |         | 1.473780704 | 2.075151554 | 3.029409915 | 1.942698983 | 2.354492217 | 0.873145938 | 0.906014109 | 3.039627905 | 0.707117896 | 2.352922722 |
| ENSMUSG00000037708  | 0.523815403  | 0.403533311 | 0.364102234 | 0.54623674  | 0.999071534 | BC061194      | Spag6      | SPAG6   | 0.98252047  | 1.422961066 | 2.154247051 | 0.138764213 | 0.457817931 | 0.072762162 | 0.258861174 | 2.486968286 | 2.199922343 | 1.30717929  |
| ENSMUSG00000060600  | 0.162363875  | 7.883665563 | 0.364016114 | 0.546284205 | 0.999071534 | Eno3          | Eno3       | ENO3    | 250.1216395 | 160.6760203 | 269.2808814 | 210.8522218 | 266.7770487 | 284.9366245 | 299.89067   | 164.8307314 | 225.2563342 | 229.2792475 |
| ENSMUSG00000031023  | 0.158008177  | 4.052120542 | 0.363937204 | 0.546327702 | 0.999071534 | Akip1         | Akip1      | AKIP1   | 15.08870721 | 14.76322106 | 16.69541464 | 16.30479504 | 17.85489932 | 16.00767553 | 21.03247038 | 14.16190274 | 13.27810271 | 19.1501766  |
| ENSMUSG00000038521  | -0.203249189 | 6.758812628 | 0.363867881 | 0.546365921 | 0.999071534 | C1s           | C1s1       | C1S     | 100.5679881 | 196.250047  | 96.06595443 | 87.42145425 | 123.3492312 | 75.59988582 | 47.50102541 | 182.7230866 | 76.05445813 | 95.48944714 |
| ENSMUSG00000078480  | 0.404213962  | 2.056128596 | 0.363588639 | 0.546519921 | 0.999071534 | Mrpl48-ps     | Mrpl48-ps  |         | 6.667103186 | 4.209593153 | 1.144443746 | 1.595788451 | 4.578179312 | 5.457162114 | 13.65492692 | 0.690824524 | 1.492804447 | 1.633974113 |
| ENSMUSG00000036144  | 0.509465143  | 0.040286651 | 0.363503872 | 0.546566685 | 0.999071534 | Meox2         | Meox 2     | MEOX2   | 0.771980369 | 0.474320355 | 0.740522424 | 0.277528426 | 1.569661478 | 1.600767553 | 2.135604685 | 0.345412262 | 0           | 1.241820326 |
| ENSMUSG00000038633  | 0.162221618  | 7.180156907 | 0.362990911 | 0.546845361 | 0.999071534 | Degs1         | Degs1      | DEGS1   | 156.852375  | 123.6197426 | 130.6012275 | 151.8080491 | 146.3055303 | 165.7522039 | 239.9643082 | 89.5308583  | 111.7246275 | 138.103492  |
| ENSMUSG00000017817  | -0.281355515 | 3.892856319 | 0.362874789 | 0.54691397  | 0.999071534 | Jph2          | Jph2       | JPH2    | 11.0884453  | 28.63709145 | 20.59998742 | 11.30928337 | 12.36108414 | 35.07136185 | 5.824376413 | 18.23776743 | 3.221314859 | 7.25484506  |
| ENSMUSG00000001911  | -0.186095639 | 7.124574266 | 0.362816771 | 0.546946019 | 0.999071534 | Nfix          | Nfix       | NFIX    | 114.3232746 | 122.0782014 | 174.763292  | 176.9937538 | 179.3338239 | 163.9331499 | 49.37776892 | 124.9701564 | 136.1594793 | 151.4367208 |
| ENSMUSG00000029725  | 0.150927816  | 4.98246898  | 0.362739552 | 0.546988681 | 0.999071534 | Ppp1r35       | Ppp1r35    | PPP1R35 | 40.35351929 | 19.56571465 | 30.15945871 | 31.91576901 | 32.89748848 | 27.21304841 | 36.11113376 | 27.14940379 | 29.2275397  | 38.3003532  |
| ENSMUSG00000029204  | -0.325403258 | 2.34532763  | 0.362656041 | 0.547034826 | 0.999071534 | Rhoh          | Rhoh       | RHOH    | 11.01826527 | 5.276813952 | 3.635291898 | 4.162926393 | 4.643581873 | 10.47775126 | 6.277383467 | 0.828989429 | 1.571373102 | 3.660102012 |
| ENSMUSG00000024069  | 0.152103329  | 4.314067771 | 0.362526705 | 0.547106306 | 0.999071534 | Slc30a6       | Slc 30a6   | SLC30A6 | 19.79076946 | 18.61707394 | 17.97449883 | 20.53710354 | 20.14398897 | 18.48158903 | 27.69814561 | 16.71795348 | 17.12796681 | 19.80376624 |
| ENSMUSG00000035469  | -0.124004737 | 5.321532251 | 0.362375789 | 0.547189735 | 0.999071534 | Rcvtb1        | Rcvtb1     | RCBTB1  | 39.37099882 | 41.08800077 | 45.10454763 | 43.71072713 | 46.37041617 | 52.82532927 | 36.56414082 | 33.64315432 | 25.3776756  | 39.4114556  |
| ENSMUSG00000021606  | 0.159068676  | 6.401806988 | 0.362248213 | 0.547260279 | 0.999071534 | Ndufs6        | Ndufs6     | NDUF56  | 106.5332909 | 53.95394041 | 83.0731519  | 96.51051021 | 72.79305106 | 74.79950204 | 134.0900881 | 68.04621561 | 71.26177017 | 79.21506498 |
| ENSMUSG00000015289  | 0.153215321  | 5.239108776 | 0.362199225 | 0.547287372 | 0.999071534 | Lage3         | Lage3      | LAGE3   | 40.91495955 | 30.83082309 | 38.43984582 | 35.10734591 | 39.89556257 | 32.08811323 | 60.96180646 | 35.78471034 | 21.13496822 | 42.41796796 |
| ENSMUSG00000046993  | -0.53565016  | -0.0104286  | 0.362076269 | 0.547355384 | 0.999071534 | Gm5637        | Gm5637     |         | 2.807201342 | 0.770770577 | 0.605881983 | 0.901967385 | 0.196207685 | 1.164194584 | 0.647152935 | 1.4507315   | 0           | 0.261435858 |
| ENSMUSG00000001150  | 0.144160058  | 5.577799971 | 0.362052701 | 0.547368422 | 0.999071534 | Mcm3ap        | Mcm3ap     | MCM3AP  | 38.87973858 | 43.81534282 | 51.49996856 | 44.95960504 | 55.72298248 | 54.93543195 | 28.08643737 | 46.83790272 | 49.65539002 | 59.80345252 |
| ENSMUSG00000026622  | 0.196218119  | 4.637533769 | 0.361970671 | 0.547413807 | 0.999071534 | Nek2          | Nek2       | NEK2    | 27.15967298 | 14.40748079 | 29.01501497 | 21.36968882 | 28.05769892 | 54.49885898 | 33.7813832  | 12.78025369 | 13.51380868 | 20.39199693 |
| ENSMUSG00000097695  | 0.176879501  | 5.549440866 | 0.361938712 | 0.547431491 | 0.999071534 | Gm26905       | Gm26905    |         | 38.10775821 | 38.36065873 | 62.27120382 | 50.16326303 | 37.60647292 | 41.61995639 | 23.16807507 | 46.00891329 | 58.84792267 | 62.67924696 |
| ENSMUSG00000028048  | -0.144141487 | 6.690942808 | 0.361758959 | 0.547530974 | 0.999071534 | Gba           | Gba        | GBA     | 107.5158114 | 128.0664959 | 111.213004  | 116.9088495 | 97.64602446 | 76.25474528 | 78.69379687 | 117.3710866 | 88.15403102 | 104.3129073 |
| ENSMUSG00000090093  | 0.474513164  | 0.335749271 | 0.3616717   | 0.547579279 | 0.999071534 | Gm14399       | Gm14399    | ZNF788  | 0.631620302 | 0.889350666 | 2.827449254 | 0           | 0.588623054 | 1.309718907 | 1.100159989 | 1.72706131  | 1.021392516 | 1.176461361 |
| ENSMUSG00000028362  | -0.459223304 | 0.595744993 | 0.361481579 | 0.547684554 | 0.999071534 | Tnfsf8        | Tnfsf8     | TNFSF8  | 2.456301174 | 2.490181865 | 0.673202203 | 0.138764213 | 2.616102464 | 3.056010784 | 1.29430587  | 0.690824524 | 0.707117896 | 0.196076894 |
| ENSMUSG00000057522  | -0.145545686 | 7.417898264 | 0.361471846 | 0.547689944 | 0.999071534 | Spop          | Spop       | SPOP    | 227.5938488 | 215.9343417 | 160.087484  | 153.681366  | 177.5679547 | 192.6014415 | 193.175151  | 145.9021395 | 112.6674514 | 147.9726956 |
| ENSMUSG00000038965  | -0.143625829 | 7.517236267 | 0.361283635 | 0.547794201 | 0.999071534 | Ube2B         | Ube2B      | UBE2L5P | 195.5917535 | 164.7670334 | 212.7318963 | 217.7904325 | 204.383005  | 217.0495278 | 158.3583231 | 164.3471542 | 145.5877179 | 159.0837196 |
| ENSMUSG00000007041  | -0.192901259 | 8.871144574 | 0.361216279 | 0.54783152  | 0.999071534 | Clc1          | Clc1       | CLIC1   | 695.6946725 | 526.1398541 | 424.0500679 | 437.8704744 | 517.9882878 | 630.7751782 | 731.6063928 | 312.736262  | 173.1653158 | 343.9188712 |
| ENSMUSG00000032565  | -0.193960155 | 3.597753653 | 0.361184051 | 0.547849378 | 0.999071534 | Nudt16        | Nudt16     | NUDT16  | 17.96608859 | 9.782857327 | 15.14704958 | 12.41939707 | 11.05303291 | 10.04117829 | 9.319002261 | 15.26722198 | 6.285492408 | 13.13715187 |
| ENSMUSG00000024622  | -0.171618726 | 4.284434842 | 0.360899241 | 0.548007244 | 0.999071534 | Hmgxb3        | Hmgxb3     | HMGXB3  | 30.38795452 | 25.43542905 | 18.51306059 | 12.76630761 | 20.14398897 | 30.56010784 | 14.04321869 | 16.85611838 | 10.52819978 | 18.95409971 |
| ENSMUSG00000021712  | 0.157415954  | 4.872241255 | 0.360853748 | 0.548032468 | 0.999071534 | Trim23        | Trim23     | TRIM23  | 27.22985301 | 33.49887509 | 24.1679591  | 28.72419211 | 29.49655528 | 29.39591325 | 47.56574071 | 32.88324734 | 15.55659371 | 24.70568858 |
| ENSMUSG00000019952  | 0.135488866  | 4.847149122 | 0.36064519  | 0.548148132 | 0.999071534 | Poc1b         | Poc1b      | POC1B   | 26.24733254 | 23.12311732 | 32.31370576 | 23.72868044 | 36.69083706 | 35.87174563 | 27.89229149 | 30.46536151 | 23.88487115 | 27.45076509 |
| ENSMUSG00000028990  | 0.182532484  | 3.74088423  | 0.360525884 | 0.548214318 | 0.999071534 | Lzic          | Lzic       | LZIC    | 10.456825   | 16.36405226 | 13.39672385 | 12.90507182 | 11.11843547 | 14.40690798 | 19.02629628 | 11.67493445 | 13.35667137 | 0.919537102 |
| ENSMUSG00000024359  | -0.217941268 | 7.94411383  | 0.360499362 | 0.548229034 | 0.999071534 | Hspa9         | Hspa9      | HSPA9   | 279.1761734 | 483.0359918 | 204.7207901 | 157.4973819 | 260.0405849 | 457.3101852 | 300.2142465 | 175.4003466 | 89.56826681 | 142.6132605 |
| ENSMUSG00000028759  | -0.129638762 | 6.886993663 | 0.360451703 | 0.548255478 | 0.999071534 | Hp1bp3        | Hp1bp3     | HP1BP3  | 108.2176117 | 137.9679333 | 131.1397892 | 119.6841338 | 144.6050637 | 129.8804583 | 103.9327613 | 110.9464185 | 92.16103243 | 109.6069835 |
| ENSMUSG00000038412  | 0.207254173  | 6.403191141 | 0.360448073 | 0.548257492 | 0.999071534 | Higd1a        | Higd1a     | HIGD1A  | 68.49571274 | 91.78098874 | 80.78426441 | 98.80011973 | 65.20635391 | 34.78031321 | 53.13125595 | 125.4537335 | 114.7102364 | 85.42416661 |
| ENSMUSG00000021967  | 0.155033508  | 5.567800673 | 0.36032632  | 0.548325061 | 0.999071534 | Mrp63         | MrpI57     | MRPL57  | 54.95096626 | 27.39200052 | 54.05813693 | 54.53433575 | 40.48418563 | 40.01918884 | 59.79693117 | 38.68617334 | 49.26254675 | 48.56171063 |
| ENSMUSG00000030301  | -0.175455275 | 3.961315862 | 0.36011355  | 0.548443179 | 0.999071534 | Ccdc91        | Ccdc91     | CCDC91  | 18.17662869 | 21.64086621 | 13.86796539 | 16.23541293 | 15.17339429 | 18.04501606 | 21.74433861 | 10.08603805 | 9.663944577 | 11.63389568 |

|                      |              |              |             |             |             |                |                |              |             |             |             |             |             |             |             |             |             |             |
|----------------------|--------------|--------------|-------------|-------------|-------------|----------------|----------------|--------------|-------------|-------------|-------------|-------------|-------------|-------------|-------------|-------------|-------------|-------------|
| ENSMUSG00000021610   | 0.176443268  | 6.772026013  | 0.359904683 | 0.548559177 | 0.999071534 | Ciptm1l        | Ciptm1l        | CLPTM1L      | 150.9572521 | 129.3115869 | 72.30191665 | 74.03070769 | 109.1568753 | 166.4798256 | 184.7621629 | 73.84914161 | 66.78335683 | 84.05162835 |
| ENSMUSG00000030924   | -0.222591456 | 3.104885004  | 0.359648157 | 0.548701705 | 0.999071534 | 2610020H08Rik  | 2610020H08Rik  | AC004381.6   | 8.91286426  | 7.411255551 | 8.818948865 | 10.96237283 | 11.11843547 | 5.020589145 | 4.918362304 | 7.944482025 | 8.406846095 | 10.32671639 |
| ENSMUSG00000028463   | -0.316571695 | 4.045999057  | 0.359552703 | 0.548754758 | 0.999071534 | Car9           | Car9           | CA9          | 11.86042567 | 30.29721269 | 13.86796539 | 15.33344555 | 23.28331193 | 2.692199976 | 4.206494076 | 33.0904947  | 7.621159544 | 20.71879175 |
| ENSMUSG00000079502   | 0.642604727  | -0.744752527 | 0.359363592 | 0.548859893 | 0.999071534 | 1700101E01Rik  | Cfap77         | CFAP77       | 0.140360067 | 0.474320355 | 1.144443746 | 0.069382107 | 0.065402562 | 0.291048646 | 0           | 0.552659619 | 0.707117896 | 1.111102397 |
| ENSMUSG00000027201   | 0.128985222  | 6.519892029  | 0.359339488 | 0.548873296 | 0.999071534 | Myef2          | Myef2          | MYEF2        | 79.58415804 | 76.48415729 | 106.635229  | 85.47875527 | 106.3445652 | 120.712426  | 106.3919425 | 80.13564478 | 69.45469111 | 91.43719134 |
| ENSMUSG00000059498   | -0.218538423 | 6.140058214  | 0.359111021 | 0.549000818 | 0.999071534 | Fcgr3          | Fcgr3          | FCGR2C       | 112.4985938 | 104.7062184 | 52.03853032 | 52.9385473  | 73.64328436 | 87.1690695  | 137.9730057 | 43.52194501 | 23.33489056 | 34.11737947 |
| ENSMUSG00000046598   | 0.722646877  | -0.042918251 | 0.359099186 | 0.549006951 | 0.999071534 | Bdh1           | Bdh1           | BDH1         | 2.245761073 | 0           | 0.336601102 | 0.069382107 | 0.654025616 | 1.45524323  | 2.459181152 | 0           | 0           | 1.372538255 |
| ENSMUSG00000057363   | 0.136361552  | 6.426429736  | 0.358996037 | 0.54906434  | 0.999071534 | Uxs1           | Uxs1           | UXS1         | 78.60163757 | 75.8319668  | 85.90060116 | 90.12735641 | 93.72187077 | 89.642983   | 126.2595376 | 77.23418178 | 56.72656898 | 87.77708933 |
| ENSMUSG00000035960   | -0.167752525 | 6.410213182  | 0.358954346 | 0.549087539 | 0.999071534 | Apex1          | Apex1          | APEX1        | 103.9366297 | 73.81610529 | 112.9633297 | 78.81807304 | 97.77682959 | 148.8713825 | 90.79555675 | 43.52194501 | 36.61299328 | 86.535269   |
| ENSMUSG00000004951   | -0.210857525 | 8.818071673  | 0.358948225 | 0.549090945 | 0.999071534 | Hspb1          | Hspb1          | HSPB1        | 355.9531301 | 726.6587843 | 566.2303733 | 393.951601  | 661.1544952 | 226.7268953 | 260.9320633 | 532.3493781 | 430.2419553 | 644.504749  |
| ENSMUSG00000027327   | -0.162293637 | 5.180854999  | 0.358942995 | 0.549093856 | 0.999071534 | 1700037H04Rik  | 1700037H04Rik  | C20orf27     | 43.3010807  | 45.59404415 | 29.62089695 | 30.52812688 | 50.22916731 | 54.49885898 | 39.08803726 | 33.15957715 | 12.33527885 | 32.74484122 |
| ENSMUSG00000004056   | -0.147086186 | 5.666024203  | 0.358822407 | 0.549160969 | 0.999071534 | Akt2           | Akt2           | AKT2         | 64.91653103 | 78.26285862 | 41.13265463 | 34.62167117 | 59.38552593 | 76.25474528 | 51.38394302 | 41.38038898 | 31.58459935 | 38.10427631 |
| ENSMUSG00000031153   | -0.14123552  | 5.013130641  | 0.358762031 | 0.549194577 | 0.999071534 | Gripap1        | Gripap1        | GRIPAP1      | 36.91469764 | 30.94940318 | 30.02481827 | 39.89471127 | 36.9524473  | 31.14220513 | 20.70889391 | 37.5808541  | 24.35628308 | 33.3330719  |
| ENSMUSG000000094103  | -0.215434352 | 3.344026402  | 0.358688163 | 0.5492357   | 0.999071534 | 1700047117Rik2 | 1700047117Rik2 | FAM177A1     | 11.01826527 | 14.40748079 | 7.674505119 | 6.660682229 | 16.61225065 | 14.33414582 | 11.13103048 | 9.947873145 | 4.242707375 | 6.666614379 |
| ENSMUSG000000053897  | -0.236798315 | 2.669634472  | 0.358636643 | 0.549264386 | 0.999071534 | Slc39a8        | Slc39a8        | SLC39A8      | 5.684582717 | 5.573264174 | 6.866662475 | 9.921641237 | 6.671061283 | 7.567264798 | 8.542418739 | 5.595678644 | 3.064177549 | 3.464025119 |
| ENSMUSG000000029149  | 0.379098514  | 0.582118066  | 0.358498764 | 0.549341168 | 0.999071534 | Krtcap3        | Krtcap3        | KRTCAP3      | 0.771980369 | 1.067220799 | 1.481044848 | 1.248877918 | 1.569661478 | 2.037340523 | 0.453007054 | 3.039627905 | 0.628549241 | 1.437897219 |
| ENSMUSG000000032575  | 0.162686606  | 7.526730623  | 0.358419353 | 0.549385399 | 0.999071534 | Manf           | Manf           | MANF         | 194.7495931 | 172.4747392 | 178.6678648 | 156.5260324 | 202.4863307 | 214.7939008 | 303.7088723 | 183.2066637 | 101.1178591 | 153.5935666 |
| ENSMUSG000000029580  | -0.149655053 | 12.75583297  | 0.358362104 | 0.549417291 | 0.999071534 | Actb           | Actb           | ACTB         | 6579.658865 | 7825.989412 | 8613.352912 | 6734.227262 | 8039.021261 | 8444.048845 | 5722.25568  | 7073.145053 | 5000.423485 | 5734.464828 |
| ENSMUSG000000014905  | -0.146844367 | 5.417512467  | 0.358173978 | 0.549522114 | 0.999071534 | Dnajb9         | Dnajb9         | DNAJB9       | 38.80955855 | 60.83158556 | 40.72873331 | 42.3924671  | 49.9021545  | 32.74297269 | 42.51794782 | 55.47320927 | 30.32750087 | 32.28732847 |
| ENSMUSG000000087249  | 0.280829698  | 2.233453459  | 0.358167874 | 0.549525516 | 0.999071534 | Gm16062        | Gm16062        |              | 5.474042616 | 2.96450222  | 3.90457278  | 5.758714844 | 3.204725518 | 2.182864846 | 6.859821109 | 4.973936572 | 2.357059653 | 7.646998847 |
| ENSMUSG000000051579  | 0.147330971  | 7.368069569  | 0.358138263 | 0.549542019 | 0.999071534 | Tcea18         | Tcea18         | TCEAL8       | 143.0970884 | 142.0589464 | 197.6521669 | 169.0148116 | 159.4514452 | 159.1308472 | 199.3231039 | 156.8171669 | 133.252439  | 186.5344847 |
| ENSMUSG000000032898  | -0.211808632 | 2.96150283   | 0.358076183 | 0.54957662  | 0.999071534 | Fbxo21         | Fbxo21         | FBXO21       | 6.73728322  | 10.37575777 | 9.694111729 | 6.105625376 | 9.875786801 | 12.36956746 | 5.75966112  | 6.010173358 | 5.342668547 | 5.751588876 |
| ENSMUSG000000053730  | -0.223949934 | 2.835786403  | 0.358047415 | 0.549592656 | 0.999071534 | Tmem39b        | Tmem39b        | TMEM39B      | 9.193584394 | 4.743203553 | 7.337904017 | 11.10113705 | 6.54025616  | 8.367648575 | 6.924536402 | 5.043019025 | 5.971217787 | 5.032640267 |
| ENSMUSG000000043061  | 0.180889895  | 4.099331813  | 0.358031246 | 0.549601669 | 0.999071534 | Tmem18         | Tmem18         | TMEM18       | 20.56274983 | 17.25340292 | 11.44443746 | 18.87193298 | 14.51936867 | 23.35665385 | 27.7628609  | 10.56961522 | 11.86386692 | 15.42471562 |
| ENSMUSG000000085256  | -0.519797545 | -0.425605891 | 0.358021134 | 0.549607306 | 0.999071534 | 3010003L10Rik  | Dmrta2os       |              | 0.98252047  | 0.237160178 | 1.279084186 | 1.040731598 | 0.196207685 | 0.072762162 | 0.517722348 | 0.759906976 | 0.628549241 | 0.326794823 |
| ENSMUSG0000000019943 | 0.193955744  | 7.952006778  | 0.357960042 | 0.549641365 | 0.999071534 | Atp2b1         | Atp2b1         | ATP2B1       | 155.9400345 | 195.3606963 | 301.7965478 | 310.1380163 | 226.2274606 | 207.663209  | 150.9160644 | 272.1848624 | 318.6744651 | 283.3311111 |
| ENSMUSG000000046096  | 0.140613439  | 4.51003413   | 0.357908047 | 0.549670354 | 0.999071534 | BC030336       | BC030336       | C16orf52     | 18.80824899 | 22.2930567  | 21.47515029 | 23.24300569 | 25.96481695 | 30.92391865 | 27.05099267 | 21.96821986 | 16.81369219 | 19.60768935 |
| ENSMUSG000000018446  | 0.147820215  | 7.424372193  | 0.357756081 | 0.549755099 | 0.999071534 | C1qbp          | C1qbp          | C1QBP        | 161.4842572 | 124.8055435 | 208.6926831 | 179.7690381 | 168.4769987 | 186.925993  | 191.2984075 | 164.1399069 | 154.3088386 | 171.6326408 |
| ENSMUSG000000069920  | -0.204691508 | 3.649003578  | 0.357719483 | 0.549775512 | 0.999071534 | B3gnt9         | B3gnt9         | B3GNT9       | 12.7727661  | 21.04796576 | 12.52156098 | 7.146356975 | 16.02362759 | 11.56918368 | 10.16030108 | 17.89235517 | 7.385453579 | 8.758101244 |
| ENSMUSG000000057101  | 0.145222286  | 4.375672985  | 0.357700601 | 0.549786045 | 0.999071534 | Zfp180         | Zfp180         | ZNF180       | 19.93112953 | 18.79494408 | 17.23397641 | 21.78598146 | 23.87193498 | 22.33798359 | 22.00319978 | 16.85611838 | 18.46363395 | 24.70568858 |
| ENSMUSG000000028800  | 0.14793446   | 5.408081298  | 0.357646753 | 0.549816082 | 0.999071534 | Hdac1          | Hdac1          | HDAC1        | 62.39004982 | 45.11972379 | 32.1117451  | 29.34863107 | 40.876601   | 54.57162114 | 59.60278529 | 31.29435093 | 30.01322625 | 42.67940382 |
| ENSMUSG000000058325  | -0.1808541   | 4.305727742  | 0.357644756 | 0.549817196 | 0.999071534 | Dock1          | Dock1          | DOCK1        | 24.14193154 | 30.89011314 | 17.3332495  | 20.46772143 | 19.29375567 | 37.69079967 | 15.59638573 | 13.40199576 | 12.09957289 | 14.24825426 |
| ENSMUSG000000084808  | 0.49889703   | -0.006607536 | 0.357222926 | 0.550052611 | 0.999071534 | 9430091E24Rik  | 9430091E24Rik  |              | 1.052700503 | 0.5336104   | 0.740522424 | 0           | 1.438856355 | 0.727621615 | 0.388291761 | 1.4507315   | 0.471411931 | 1.830051006 |
| ENSMUSG000000057691  | -0.18027019  | 3.724816304  | 0.35714139  | 0.550098137 | 0.999071534 | Zfp746         | Zfp746         | ZNF746       | 13.89564664 | 16.9569527  | 13.06012275 | 14.22333184 | 14.06155074 | 20.2278809  | 11.32517636 | 10.63869767 | 5.342668547 | 14.11753633 |
| ENSMUSG000000035051  | 0.152649697  | 5.012793609  | 0.356969403 | 0.550194188 | 0.999071534 | Dhx57          | Dhx57          | DHX57        | 25.12445201 | 31.60159367 | 36.4022392  | 30.94441952 | 33.81312435 | 33.32506998 | 18.44385864 | 37.99534882 | 28.99183373 | 43.4637114  |
| ENSMUSG000000035004  | -0.227875918 | 3.556751414  | 0.356593501 | 0.550404231 | 0.999071534 | Igsf6          | Igsf6          | IGSF6        | 22.03653053 | 17.66843323 | 7.068623136 | 7.354053294 | 11.64165596 | 14.40690798 | 15.53167044 | 11.19135729 | 5.185531236 | 6.797332309 |
| ENSMUSG000000019814  | 0.156292218  | 5.431004029  | 0.356544399 | 0.55043168  | 0.999071534 | Ltv1           | Ltv1           | RP3-468K18.7 | 48.77512331 | 29.22999189 | 44.36402521 | 43.01690606 | 45.78179312 | 59.51944813 | 65.81545347 | 24.45518815 | 27.73473525 | 46.47022376 |
| ENSMUSG000000058163  | -0.391522918 | 1.068507767  | 0.356477907 | 0.550468852 | 0.999071534 | Gm5431         | Gm5431         |              | 5.824942784 | 1.956571465 | 0.673202203 | 1.318260024 | 1.896674286 | 2.619437815 | 2.200319978 | 0.967154334 | 0.235705965 | 2.548999616 |
| ENSMUSG000000026955  | 0.291296023  | 2.424706458  | 0.356460799 | 0.550478418 | 0.999071534 | Sapcd2         | Sapcd2         | SAPCD2       | 4.912602348 | 2.608761954 | 2.962089695 | 8.256470679 | 5.493815174 | 8.513172898 | 8.154126978 | 2.210638477 | 6.442629718 | 2.679717545 |

|                     |              |              |             |             |             |               |               |             |             |             |             |             |             |             |             |             |             |             |
|---------------------|--------------|--------------|-------------|-------------|-------------|---------------|---------------|-------------|-------------|-------------|-------------|-------------|-------------|-------------|-------------|-------------|-------------|-------------|
| ENSMUSG00000041020  | -0.61279496  | -0.134838424 | 0.356343589 | 0.550543959 | 0.999071534 | Map7d2        | Map7d2        | MAP7D2      | 1.473780704 | 0.415030311 | 0.740522424 | 2.22022741  | 0           | 0.291048646 | 0           | 0.690824524 | 1.099961171 | 0.71894861  |
| ENSMUSG00000037922  | -0.328241467 | 1.534065184  | 0.356237424 | 0.550603336 | 0.999071534 | Bank1         | Bank1         | BANK1       | 3.509001677 | 5.276813952 | 1.88496617  | 1.665170557 | 3.727946011 | 3.492583753 | 1.747312924 | 4.835771668 | 0.864255206 | 1.176461361 |
| ENSMUSG00000047603  | 0.270378145  | 2.074631861  | 0.356186015 | 0.550632093 | 0.999071534 | Zfp235        | Zfp235        | ZNF235      | 3.649361744 | 5.217523908 | 3.433331237 | 1.526406344 | 5.559217736 | 5.311637791 | 2.588611739 | 3.523205072 | 4.00700141  | 6.143742663 |
| ENSMUSG00000024498  | 0.135471101  | 6.030993951  | 0.356046178 | 0.550710329 | 0.999071534 | Tcerg1        | Tcerg1        | TCERG1      | 53.82808573 | 57.09631276 | 84.62151697 | 62.513278   | 64.29071805 | 93.71766404 | 48.92476187 | 58.51283718 | 63.48347332 | 67.12365655 |
| ENSMUSG00000049791  | -0.261652453 | 2.94937851   | 0.355837868 | 0.550826913 | 0.999071534 | Fzd4          | Fzd4          | FZD4        | 11.64988557 | 10.67220799 | 10.97319592 | 3.469105327 | 6.54025616  | 15.28005392 | 7.701119924 | 3.17779281  | 4.478413341 | 4.509768551 |
| ENSMUSG00000063362  | -0.146537786 | 4.621209956  | 0.355832976 | 0.550829651 | 0.999071534 | Alg11         | Alg11         | ALG11       | 22.52779077 | 32.43165429 | 28.54377342 | 19.63513615 | 30.87000907 | 26.77647544 | 27.69814561 | 25.07693022 | 15.3994564  | 18.36586903 |
| ENSMUSG00000061887  | 0.175361764  | 6.425170451  | 0.355747979 | 0.550877235 | 0.999071534 | Ssbp3         | Ssbp3         | SSBP3       | 58.45996794 | 55.49548157 | 103.0672573 | 98.38382709 | 101.1123602 | 87.53288031 | 45.23599014 | 93.60672299 | 103.4749188 | 99.60706191 |
| ENSMUSG00000048222  | -0.135431304 | 5.097966394  | 0.355607626 | 0.550955826 | 0.999071534 | Mfap1b        | Mfap1b        | MFAP1       | 33.19515587 | 39.72432975 | 41.06533441 | 36.63375226 | 34.53255252 | 29.90524839 | 32.94008438 | 41.38038898 | 24.6705577  | 27.2546882  |
| ENSMUSG00000096727  | -0.150630706 | 6.683287066  | 0.355511501 | 0.551009662 | 0.999071534 | Psmb9         | Psmb9         | PSMB9       | 142.9567283 | 80.93091062 | 119.6280315 | 111.2195168 | 105.7559421 | 95.46395592 | 60.5735147  | 97.61350523 | 86.2683833  | 125.8160067 |
| ENSMUSG00000078580  | -0.262131526 | 2.015551061  | 0.355480019 | 0.551027297 | 0.999071534 | E430018J23Rik | E430018J23Rik | AC002310.13 | 6.246022985 | 4.565333419 | 5.452937848 | 1.80393477  | 4.251166504 | 3.638108076 | 4.141778783 | 3.937699786 | 2.042785033 | 3.529384083 |
| ENSMUSG00000063480  | 0.1737929    | 7.59919609   | 0.355174545 | 0.551198461 | 0.999071534 | Nhp2l1        | Nhp2l1        | SNU13       | 241.7000355 | 135.5963316 | 205.8652338 | 178.6589244 | 184.239016  | 259.2515815 | 331.7305944 | 127.4571247 | 128.3026138 | 165.684975  |
| ENSMUSG00000033249  | -0.291551392 | 2.212532256  | 0.355123849 | 0.551226876 | 0.999071534 | Hsf4          | Hsf4          | HSF4        | 3.930081878 | 4.387463286 | 7.674505119 | 3.81601586  | 5.951633105 | 3.056010784 | 1.035444696 | 6.286503168 | 3.221314859 | 5.620870947 |
| ENSMUSG00000046861  | -0.163104686 | 4.123830666  | 0.354879072 | 0.551364116 | 0.999071534 | Hectd3        | Hectd3        | HECTD3      | 21.5452703  | 24.01246798 | 13.93528561 | 13.52951078 | 22.43307863 | 22.33798359 | 13.78435751 | 18.65226215 | 10.13535651 | 15.42471562 |
| ENSMUSG00000037916  | -0.13481807  | 6.626381964  | 0.354773348 | 0.551423412 | 0.999071534 | Ndufv1        | Ndufv1        | NDUUFV1     | 132.1490032 | 102.3939067 | 96.87379707 | 98.5225913  | 107.1293959 | 134.3189502 | 112.2810342 | 62.93411413 | 68.90471052 | 84.90129489 |
| ENSMUSG00000055228  | 0.319872572  | 1.328836773  | 0.354674291 | 0.551478979 | 0.999071534 | Zfp935        | Zfp935        |             | 2.245761073 | 3.675982753 | 1.346404407 | 1.457024238 | 2.289089656 | 3.419821592 | 3.624056435 | 1.174401691 | 0.942823861 | 3.986896835 |
| ENSMUSG00000038374  | -0.152009572 | 7.211987518  | 0.354607988 | 0.551516179 | 0.999071534 | Rbm8a         | Rbm8a         | RBM8A       | 141.2724075 | 116.149197  | 228.7541087 | 162.770422  | 158.4704067 | 182.8513119 | 147.4214385 | 105.8343171 | 102.5320949 | 148.8877211 |
| ENSMUSG00000022099  | -0.371293578 | 0.416531701  | 0.354557245 | 0.551544652 | 0.999071534 | Dmtn          | Dmtn          | DMTN        | 1.122880537 | 1.956571465 | 2.423527932 | 0.624438959 | 0.915635862 | 1.309718907 | 0.582437641 | 0.967154334 | 1.178529826 | 0.980384468 |
| ENSMUSG00000021932  | 0.166426018  | 4.778425674  | 0.354449507 | 0.551605115 | 0.999071534 | Rnaseh2b      | Rnaseh2b      | RNASEH2B    | 30.87921476 | 16.48263235 | 28.94769475 | 31.7770048  | 25.04918109 | 34.78031321 | 44.13583015 | 19.89574629 | 21.76351746 | 20.39199693 |
| ENSMUSG00000016262  | -0.169525315 | 6.077543112  | 0.354444684 | 0.551607822 | 0.999071534 | Sertad4       | Sertad4       | SERTAD4     | 49.75764378 | 59.11217427 | 79.84178133 | 92.41696592 | 87.31241973 | 65.92251834 | 30.22204205 | 70.7859616  | 70.24037766 | 63.33283661 |
| ENSMUSG00000073234  | 0.237307896  | 2.575723063  | 0.354434711 | 0.551613419 | 0.999071534 | Gm8773        | Gm8773        | CTB-16J4.1  | 5.193322482 | 3.557402664 | 6.597381593 | 6.452535909 | 5.886230544 | 4.947826984 | 7.053966989 | 3.730452429 | 5.342668547 | 9.084896066 |
| ENSMUSG00000029203  | 0.128266012  | 6.674281947  | 0.354293079 | 0.551692925 | 0.999071534 | Ube2k         | Ube2k         | UBE2K       | 100.1469079 | 86.14843452 | 103.9424202 | 116.0762643 | 98.03843983 | 126.0968259 | 118.2995565 | 89.32361095 | 78.41151779 | 106.9926249 |
| ENSMUSG00000005125  | -0.305349711 | 9.507408254  | 0.354292859 | 0.551693049 | 0.999071534 | Ndrgr1        | Ndrgr1        | NDRG1       | 395.394309  | 1834.908294 | 707.2662349 | 514.3295558 | 744.6081638 | 233.0572034 | 247.6007129 | 1657.564363 | 330.3811947 | 597.3155766 |
| ENSMUSG00000010358  | -0.12621089  | 5.696514283  | 0.35426362  | 0.551709465 | 0.999071534 | Ifi35         | Ifi35         | IFI35       | 61.47770938 | 43.45960255 | 68.26270343 | 51.55090517 | 55.59217736 | 55.80857789 | 44.26526074 | 42.27846087 | 37.87009176 | 59.80345252 |
| ENSMUSG00000032952  | -0.180945596 | 3.747393353  | 0.354233263 | 0.551726509 | 0.999071534 | Ap4b1         | Ap4b1         | AP4B1       | 16.49230788 | 17.4905631  | 11.44443746 | 13.59889288 | 14.45396611 | 15.78938905 | 13.65492692 | 16.71795348 | 6.049786443 | 9.215613995 |
| ENSMUSG00000005410  | 0.290455184  | 5.969555886  | 0.354157419 | 0.551769098 | 0.999071534 | Mcm5          | Mcm5          | MCM5        | 110.884453  | 48.26209615 | 47.19147446 | 28.93233843 | 59.97414898 | 193.256301  | 106.5860884 | 15.88896405 | 20.34928167 | 29.54225196 |
| ENSMUSG000000079484 | -0.219235278 | 2.936505391  | 0.354084952 | 0.551809797 | 0.999071534 | Phyhd1        | Phyhd1        | PHYHD1      | 7.368903522 | 7.885575906 | 10.63659481 | 8.325852786 | 7.717502268 | 10.11394045 | 9.836724609 | 6.770080335 | 3.614158135 | 4.182973728 |
| ENSMUSG00000020814  | -0.13672086  | 5.126738916  | 0.354051913 | 0.551828354 | 0.999071534 | Mxra7         | Mxra7         | MXRA7       | 28.63345369 | 35.33686647 | 38.84376714 | 49.19191354 | 35.97140888 | 37.32698886 | 29.96318088 | 30.67260886 | 30.95605011 | 30.52263642 |
| ENSMUSG000000022698 | 0.138829142  | 7.217900917  | 0.353847538 | 0.551943171 | 0.999071534 | Naa50         | Naa50         | NAA50       | 130.7454025 | 151.9010938 | 145.8155973 | 152.5018702 | 153.1073967 | 200.9690901 | 181.9794053 | 133.5363805 | 118.7172379 | 126.5349553 |
| ENSMUSG000000001416 | 0.183429039  | 8.684092327  | 0.353704108 | 0.552023777 | 0.999071534 | Cct3          | Cct3          | CCT3        | 538.8422975 | 327.9332356 | 415.5677202 | 339.0009726 | 382.9319981 | 566.3079031 | 734.971588  | 240.199687  | 274.4403123 | 343.0038457 |
| ENSMUSG00000032739  | 0.582388485  | 0.940359985  | 0.353424636 | 0.5521809   | 0.999071534 | Pram1         | Pram1         | PRAM1       | 3.087921476 | 1.304380977 | 2.490848153 | 0           | 0.654025616 | 1.600767553 | 0           | 0.414494714 | 1.885647722 | 6.339819557 |
| ENSMUSG00000027329  | -0.150117172 | 5.255198181  | 0.353307381 | 0.552246847 | 0.999071534 | Spef1         | Spef1         | SPEF1       | 38.38847835 | 36.99698771 | 38.10324471 | 44.61269451 | 49.50973913 | 44.96701582 | 18.50857394 | 31.91609301 | 31.42746204 | 47.97347995 |
| ENSMUSG000000091586 | -0.3780923   | 1.88114653   | 0.353230333 | 0.552290189 | 0.999071534 | Cyp4f17       | Cyp4f17       | CYP4F8      | 7.088183388 | 5.158233863 | 4.173853661 | 0.901967385 | 3.727946011 | 4.584016176 | 2.588611739 | 3.661369977 | 0.078568655 | 4.705845444 |
| ENSMUSG00000032177  | 0.191212576  | 4.007285417  | 0.352870551 | 0.552492662 | 0.999071534 | Pde4a         | Pde4a         | PDE4A       | 11.15862533 | 15.11896132 | 21.54247051 | 13.66827499 | 15.76201734 | 16.37148634 | 7.895265804 | 19.82666384 | 15.08518178 | 22.09133    |
| ENSMUSG000000022574 | -0.282788423 | 1.662895702  | 0.35277872  | 0.552544363 | 0.999071534 | Naprt1        | Naprt         | NAPRT       | 4.631882214 | 1.897281421 | 3.231370576 | 3.607869541 | 3.924153696 | 4.729540499 | 2.135604685 | 1.381649048 | 1.964216377 | 3.398666154 |
| ENSMUSG000000097577 | -0.374905704 | 0.55386616   | 0.352574205 | 0.55265954  | 0.999071534 | 6230400D17Rik | 6230400D17Rik |             | 1.122880537 | 1.245090933 | 2.423527932 | 1.526406344 | 1.504258917 | 0.654859454 | 1.229590576 | 0.483577167 | 2.042785033 | 0.915025503 |
| ENSMUSG00000024524  | 0.236451292  | 2.405245634  | 0.352530609 | 0.552684098 | 0.999071534 | Gnal          | Gnal          | GNAL        | 3.579181711 | 2.845922132 | 5.250977187 | 5.758714844 | 7.128879214 | 6.766881022 | 5.112508185 | 4.559441858 | 4.399844685 | 6.339819557 |
| ENSMUSG00000055884  | -0.269708114 | 2.847597578  | 0.352507164 | 0.552697305 | 0.999071534 | Fancm         | Fancm         | FANCM       | 8.070703857 | 7.233385418 | 5.99149961  | 11.03175494 | 7.521294584 | 12.22404314 | 7.44225875  | 2.072473572 | 7.228316269 | 2.61435858  |
| ENSMUSG00000018372  | 0.204100627  | 3.721682027  | 0.352493901 | 0.552704777 | 0.999071534 | Cep95         | Cep95         | CEP95       | 9.544484562 | 12.51019937 | 12.38692054 | 11.51742969 | 17.13547114 | 10.18670261 | 6.730390522 | 18.23776743 | 12.02100423 | 19.08481764 |
| ENSMUSG00000035629  | 0.143669364  | 5.131630368  | 0.352457346 | 0.552725372 | 0.999071534 | 1700021K19Rik | Rubcn         | RUBCN       | 36.49361744 | 34.4475158  | 33.18886863 | 25.81014364 | 43.16569065 | 42.9296753  | 22.39149154 | 37.71901901 | 26.71334273 | 48.49635166 |

|                    |              |              |             |             |             |               |          |                |             |             |             |             |             |             |             |             |             |             |
|--------------------|--------------|--------------|-------------|-------------|-------------|---------------|----------|----------------|-------------|-------------|-------------|-------------|-------------|-------------|-------------|-------------|-------------|-------------|
| ENSMUSG00000053746 | 0.189665522  | 4.290258103  | 0.352368365 | 0.552775508 | 0.999071534 | Pthr1         | Pthr1    | PTRH1          | 18.52752886 | 26.73981003 | 14.74312825 | 13.25198235 | 21.51744277 | 18.99092416 | 32.61650791 | 26.25133191 | 9.271101302 | 13.9868184  |
| ENSMUSG00000057244 | -0.431995586 | 0.453382904  | 0.351964313 | 0.553003281 | 0.999071534 | Gm6139        | Gm6139   |                | 1.543960738 | 1.719411288 | 1.817645949 | 0.832585279 | 1.438856355 | 1.164194584 | 2.588611739 | 0.690824524 | 0           | 0.784307574 |
| ENSMUSG00000024533 | -0.140804368 | 5.151078202  | 0.351888294 | 0.553046154 | 0.999071534 | Spire1        | Spire1   | SPIRE1         | 38.31829831 | 46.0683645  | 35.00651458 | 32.67897218 | 41.13821124 | 49.62379416 | 26.33912445 | 42.55479067 | 23.57059653 | 23.52922722 |
| ENSMUSG00000058216 | -0.527191465 | 0.074147604  | 0.351882892 | 0.553049201 | 0.999071534 | BC021614      | BC021614 |                | 1.403600671 | 1.126510844 | 2.692808814 | 0.138764213 | 0.261610246 | 1.091432423 | 0.453007054 | 1.036236786 | 0           | 1.176461361 |
| ENSMUSG00000030443 | -0.386180056 | 0.407229975  | 0.351817802 | 0.553085916 | 0.999071534 | Zfp583        | Zfp583   | ZNF583         | 0.842160403 | 2.134441599 | 0.673202203 | 0.971349492 | 2.419894779 | 1.018670261 | 0.711868228 | 1.519813953 | 1.178529826 | 0.457512752 |
| ENSMUSG00000024077 | -0.138660809 | 4.861097463  | 0.351815129 | 0.553087424 | 0.999071534 | Strn          | Strn     | STRN           | 23.93139144 | 37.17485784 | 32.58298665 | 29.97307003 | 33.68231922 | 41.54719423 | 20.70889391 | 27.2875687  | 20.58498764 | 25.42463719 |
| ENSMUSG00000032199 | -0.16117421  | 7.099894159  | 0.351792419 | 0.553100235 | 0.999071534 | Polr2m        | Polr2m   | POLR2M         | 182.4680872 | 178.8187739 | 132.5535139 | 119.8922801 | 140.1576895 | 210.355409  | 173.3075559 | 102.7946892 | 62.61921811 | 100.9142412 |
| ENSMUSG00000095325 | 0.383682118  | 1.615419143  | 0.35178332  | 0.553105368 | 0.999071534 | Zfp870        | Zfp870   | CTD-3105H18.14 | 4.280982046 | 3.379532531 | 2.625488593 | 0           | 3.139322957 | 2.837724299 | 4.27120937  | 2.486968286 | 2.514196963 | 3.856178906 |
| ENSMUSG00000002455 | -0.136793026 | 5.401005136  | 0.351722336 | 0.553139773 | 0.999071534 | Prpf6         | Prpf6    | PRPF6          | 41.47639982 | 56.91844263 | 41.13265463 | 39.68656495 | 50.29456987 | 55.5902914  | 26.72741621 | 48.49588158 | 26.39906811 | 39.93432731 |
| ENSMUSG00000071646 | -0.127428249 | 6.745651427  | 0.351649468 | 0.553180888 | 0.999071534 | Mta2          | Mta2     | MTA2           | 116.0075954 | 113.5997251 | 120.5031944 | 105.2526556 | 126.2923464 | 152.1456797 | 86.78320856 | 91.39608452 | 79.51147896 | 93.7247551  |
| ENSMUSG00000034453 | 0.151157108  | 4.697930834  | 0.351522545 | 0.553252517 | 0.999071534 | Polr3b        | Polr3b   |                | 31.30029496 | 29.52644211 | 21.81175139 | 19.28822562 | 25.70320671 | 44.8214915  | 29.89486559 | 24.3861057  | 18.62077126 | 17.32012559 |
| ENSMUSG00000062470 | 0.319725026  | 1.028423591  | 0.35120827  | 0.553429953 | 0.999071534 | 5730577103Rik | Fbxl12os |                | 1.19306057  | 1.422961066 | 2.221567271 | 1.803393477 | 2.158284533 | 2.983248622 | 2.394465859 | 0.690824524 | 2.435628308 | 1.764692042 |
| ENSMUSG00000020460 | 0.197606148  | 9.706896561  | 0.351183099 | 0.553444169 | 0.999071534 | Rps27a        | Rps27a   | RPS27A         | 1109.40597  | 652.842679  | 708.208718  | 999.5880091 | 553.5672813 | 572.128876  | 1037.062578 | 518.8782999 | 1060.991118 | 976.2668528 |
| ENSMUSG00000096056 | 0.681069926  | 0.30257649   | 0.351149544 | 0.553463122 | 0.999071534 | Gm21986       | Gm21986  |                | 0           | 0.592900444 | 2.625488593 | 0           | 1.308051232 | 0.9459081   | 0.517722348 | 1.243484143 | 3.378452169 | 0           |
| ENSMUSG00000071552 | -0.400958447 | 0.855280727  | 0.35112239  | 0.553478459 | 0.999071534 | Tigit         | Tigit    | TIGIT          | 2.315941107 | 2.253021687 | 1.88496617  | 2.081463196 | 1.308051232 | 1.600767553 | 1.941458804 | 2.763298096 | 0           | 0.849666539 |
| ENSMUSG00000020728 | 0.260098069  | 1.878924797  | 0.35100599  | 0.553544215 | 0.999071534 | Cep112        | Cep112   | CEP112         | 5.193322482 | 2.727342043 | 1.88496617  | 2.914048475 | 4.120361381 | 4.074681045 | 4.400639957 | 3.937699786 | 2.514196963 | 3.856178906 |
| ENSMUSG00000003190 | 0.189112157  | 3.708124063  | 0.350981284 | 0.553558174 | 0.999071534 | Bc12l12       | Bc12l12  | BCL2L12        | 17.05374815 | 8.715636528 | 15.14704958 | 7.909560147 | 14.32316099 | 15.35281608 | 8.412988152 | 15.26722198 | 13.35667137 | 13.66002358 |
| ENSMUSG00000078302 | -0.167057966 | 4.74961921   | 0.350621186 | 0.553761702 | 0.999071534 | Foxd1         | Foxd1    | FOXD1          | 24.70337181 | 22.23376665 | 42.6810197  | 30.87503741 | 25.89941439 | 28.81381596 | 14.17264927 | 25.8368372  | 28.44185315 | 22.74491965 |
| ENSMUSG00000030126 | 0.160036295  | 4.618850294  | 0.350582984 | 0.553783302 | 0.999071534 | Tmcc1         | Tmcc1    | TMCC1          | 20.00130956 | 19.98074497 | 31.23658224 | 25.60199732 | 22.56388375 | 27.28581057 | 16.95540689 | 23.34986891 | 30.48463818 | 24.05209894 |
| ENSMUSG00000004842 | 0.854048928  | 0.461516671  | 0.350440022 | 0.55386415  | 0.999071534 | Pou1f1        | Pou1f1   | POU1F1         | 0.350900168 | 0.059290044 | 3.433331237 | 0.901967385 | 0           | 0           | 0           | 0           | 5.971217787 | 0.71894861  |
| ENSMUSG00000046111 | 0.179837242  | 3.571856228  | 0.350293051 | 0.553947288 | 0.999071534 | 5830418K08Rik | Cep295   | CEP295         | 11.2989854  | 10.25717768 | 14.40652715 | 10.33793388 | 10.92222779 | 14.62519447 | 9.901439902 | 13.54016067 | 12.88525944 | 8.888819173 |
| ENSMUSG00000032905 | -0.146038928 | 5.343565967  | 0.350228727 | 0.553983682 | 0.999071534 | Atg12         | Atg12    | ATG12          | 40.07279915 | 57.62992316 | 33.25618885 | 46.20848296 | 43.36189834 | 31.94258891 | 52.35467242 | 42.76203803 | 27.8133039  | 29.67296989 |
| ENSMUSG00000086922 | -0.247538917 | 7.359558639  | 0.350200494 | 0.553999657 | 0.999071534 | Gm13835       | Gm13835  |                | 324.6528352 | 163.1662022 | 113.5692117 | 169.3617221 | 157.3585632 | 203.0064306 | 340.0141519 | 80.89555175 | 40.61999469 | 92.28685788 |
| ENSMUSG00000073805 | 0.5323882    | 0.703665486  | 0.350089761 | 0.554062323 | 0.999071534 | Fam196a       | Fam196a  | FAM196A        | 0.98252047  | 0           | 2.625488593 | 2.567137942 | 0.065402562 | 0.727621615 | 0.711868228 | 1.934308667 | 1.571373102 | 3.398666154 |
| ENSMUSG00000087658 | 0.229226531  | 3.125237072  | 0.350019479 | 0.554102104 | 0.999071534 | Gm15051       | Hotairm1 |                | 6.947823321 | 6.344034752 | 9.290190407 | 10.82360862 | 7.39048946  | 5.457162114 | 6.600959935 | 8.704389002 | 12.33527885 | 9.738485711 |
| ENSMUSG00000029093 | -0.167366504 | 5.18530679   | 0.350000267 | 0.554112979 | 0.999071534 | Sorcs2        | Sorcs2   | SORCS2         | 45.33630167 | 47.96564593 | 30.83266092 | 29.90368792 | 46.17420849 | 67.66881022 | 35.78755729 | 29.01463001 | 13.1209654  | 28.82330335 |
| ENSMUSG00000027808 | 0.177288391  | 8.144816859  | 0.34975243  | 0.554253307 | 0.999071534 | Serp1         | Serp1    | SERP1          | 329.9163377 | 289.2168366 | 243.2279561 | 225.6999926 | 295.5541759 | 344.601597  | 522.5759948 | 201.0299365 | 187.2291051 | 217.8414287 |
| ENSMUSG00000030084 | -0.143992671 | 5.489485932  | 0.349653908 | 0.55430911  | 0.999071534 | Plkna1        | Plkna1   | PLXNA1         | 49.40674361 | 56.79986254 | 43.690823   | 42.3924671  | 52.4528544  | 81.1298101  | 41.676649   | 28.04747567 | 26.00622484 | 37.77748148 |
| ENSMUSG00000078695 | 0.208170747  | 4.431244947  | 0.349200048 | 0.554566313 | 0.999071534 | Cisd3         | Cisd3    | CISD3          | 15.43960738 | 11.97658897 | 32.78494731 | 24.3531194  | 18.051107   | 13.38823772 | 16.04939278 | 18.23776743 | 28.91326508 | 29.86904678 |
| ENSMUSG00000030591 | -0.181219608 | 6.99703154   | 0.348997293 | 0.554681288 | 0.999071534 | Psmc8         | Psmc8    | PSMD8          | 201.2061562 | 164.3520031 | 112.3574478 | 118.9209306 | 109.353083  | 169.826885  | 204.3708968 | 76.95785197 | 61.20498232 | 83.98626939 |
| ENSMUSG00000026942 | 0.128415053  | 5.005186692  | 0.348847851 | 0.554766059 | 0.999071534 | Traf2         | Traf2    | TRAF2          | 34.66893657 | 27.09555029 | 30.8998114  | 26.4345826  | 40.09177026 | 39.00051858 | 27.56871502 | 31.7779281  | 26.79191139 | 36.79709702 |
| ENSMUSG00000021929 | 0.151973218  | 7.629492881  | 0.348785095 | 0.554801665 | 0.999071534 | Kpna3         | Kpna3    | KPNA3          | 197.2058943 | 206.2107774 | 174.6286516 | 181.6423549 | 214.8474148 | 244.9174357 | 271.0923644 | 189.2859196 | 172.1439233 | 132.4172621 |
| ENSMUSG00000073131 | 0.136785396  | 6.523015159  | 0.348323426 | 0.555063736 | 0.999071534 | Vma21         | Vma21    | VMA21          | 88.4970223  | 88.16429603 | 94.38294892 | 89.57229955 | 93.3294554  | 91.24375055 | 136.5492692 | 90.15260037 | 76.36873276 | 68.69227169 |
| ENSMUSG00000027254 | -0.16431366  | 4.626895426  | 0.34831903  | 0.555066232 | 0.999071534 | Map1a         | Map1a    | MAP1A          | 19.86094949 | 37.41201802 | 28.27449254 | 22.13289199 | 27.33827075 | 31.43325378 | 12.81362811 | 30.46536151 | 17.04939816 | 21.43774036 |
| ENSMUSG00000073787 | 0.380451991  | 0.664738108  | 0.348278017 | 0.555089525 | 0.999071534 | Gm10575       | Gm10575  |                | 1.263240604 | 2.54947191  | 0.807842644 | 1.040731598 | 0.915635862 | 1.236956746 | 0.453007054 | 1.105319238 | 2.78490998  | 2.61435858  |
| ENSMUSG00000044709 | 0.137558764  | 5.364497747  | 0.348269017 | 0.555094637 | 0.999071534 | Gemin7        | Gemin7   | GEMIN7         | 45.54684177 | 36.99698771 | 38.30520537 | 37.53571964 | 44.99696238 | 42.34757801 | 65.62130759 | 33.50498941 | 28.75612777 | 38.75786595 |
| ENSMUSG00000089883 | -0.801302266 | -0.691960689 | 0.348073267 | 0.555205838 | 0.999071534 | Gm3355        | Gm3355   |                | 1.19306057  | 0.415030311 | 0           | 1.526406344 | 0           | 1.164194584 | 0           | 0.621742072 | 0.078568655 | 0           |
| ENSMUSG00000028896 | 0.190178838  | 5.344383312  | 0.347498774 | 0.55553244  | 0.999071534 | Rcc1          | Rcc1     | RCC1           | 52.07358489 | 28.81496158 | 43.82546344 | 35.03796381 | 36.9524473  | 85.49553979 | 61.93253586 | 16.30345876 | 26.08479349 | 29.15009817 |
| ENSMUSG00000030556 | -0.213203626 | 2.873108145  | 0.347376133 | 0.555602209 | 0.999071534 | Lrrc28        | Lrrc28   | LRRC28         | 7.789983723 | 7.411255551 | 7.87646578  | 8.464616999 | 8.502333007 | 11.49642152 | 3.818202315 | 5.664761096 | 4.635550651 | 7.516280918 |

|                      |              |              |             |             |             |               |               |          |             |             |             |             |             |             |             |             |             |             |
|----------------------|--------------|--------------|-------------|-------------|-------------|---------------|---------------|----------|-------------|-------------|-------------|-------------|-------------|-------------|-------------|-------------|-------------|-------------|
| ENSMUSG00000001034   | -0.193813966 | 4.403202699  | 0.346985633 | 0.55582447  | 0.999071534 | Mapk7         | Mapk7         | MAPK7    | 25.47535218 | 26.38406976 | 25.71632417 | 13.52951078 | 26.16102464 | 26.55818896 | 12.8783434  | 27.77114586 | 6.049786443 | 24.50961169 |
| ENSMUSG000000028456  | 0.332658345  | 0.707598552  | 0.346985229 | 0.5558247   | 0.999071534 | Unc13b        | Unc13b        | UNC13B   | 1.052700503 | 2.312311732 | 1.548365068 | 0.624438959 | 1.373453794 | 1.964578361 | 1.423736457 | 2.141556024 | 0.942823861 | 1.699333077 |
| ENSMUSG000000073197  | 0.623475501  | 0.049260045  | 0.346948101 | 0.555845841 | 0.999071534 | 5730507C01Rik | 5730507C01Rik | ZNF788   | 0.070180034 | 1.837991377 | 0           | 0.693821065 | 1.046440986 | 0.291048646 | 1.423736457 | 2.486968286 | 0           | 1.045743432 |
| ENSMUSG000000040811  | -0.213603637 | 3.232523687  | 0.346741185 | 0.55596331  | 0.999071534 | EmI2          | EmI2          | EML2     | 12.3516859  | 15.77115181 | 8.751628644 | 6.383153803 | 8.698540692 | 14.33414582 | 6.406814054 | 8.980718811 | 4.00700141  | 9.28097296  |
| ENSMUSG000000058966  | 0.542184917  | -0.295740354 | 0.346734166 | 0.555967687 | 0.999071534 | Fam57b        | Fam57b        | FAM57B   | 0.491260235 | 0.474320355 | 0.875162864 | 0           | 1.046440986 | 0.582097292 | 0.970729402 | 0.207247357 | 0.15713731  | 2.0261279   |
| ENSMUSG000000004895  | 0.125861808  | 5.265232454  | 0.346513547 | 0.556093393 | 0.999071534 | Prcc          | Prcc          | PRCC     | 45.75738187 | 39.30929944 | 32.4483462  | 34.20537853 | 38.97992671 | 51.73389684 | 43.74753839 | 30.39627905 | 34.88448286 | 33.72522568 |
| ENSMUSG000000019960  | -0.145461355 | 6.84024676   | 0.346459695 | 0.556124085 | 0.999071534 | Dusp6         | Dusp6         | DUSP6    | 137.6230458 | 136.129942  | 124.7443683 | 98.10629866 | 129.6932796 | 185.6890362 | 128.8481493 | 84.83325154 | 59.16219729 | 87.31957658 |
| ENSMUSG000000023972  | -0.151703377 | 6.211919279  | 0.346450444 | 0.556129358 | 0.999071534 | Ptk7          | Ptk7          | PTK7     | 76.63659663 | 104.7062184 | 76.47577031 | 68.96581391 | 78.28686623 | 100.1934964 | 94.54904377 | 70.74043125 | 45.41262865 | 35.22848187 |
| ENSMUSG000000016534  | -0.168572149 | 9.754156035  | 0.346387958 | 0.556164976 | 0.999071534 | Lamp2         | Lamp2         | LAMP2    | 733.9427908 | 1145.661528 | 839.8197488 | 1055.995662 | 956.120048  | 583.5525354 | 840.1339399 | 1070.501682 | 655.9697014 | 712.0859183 |
| ENSMUSG000000034187  | -0.205711629 | 4.6898707    | 0.346322194 | 0.556202467 | 0.999071534 | Nsf           | Nsf           | NSF      | 38.66919848 | 36.99698771 | 22.01371205 | 19.21884351 | 26.81505025 | 55.44476708 | 27.05099267 | 15.88896405 | 7.306884924 | 18.2351511  |
| ENSMUSG000000070697  | 0.124530504  | 6.382309714  | 0.346307385 | 0.55621091  | 0.999071534 | Utp3          | Utp3          | UTP3     | 72.77669478 | 80.93091062 | 90.74765702 | 82.28717837 | 86.52758899 | 83.67648575 | 86.78320856 | 88.63278642 | 80.29716551 | 75.6856809  |
| ENSMUSG000000006705  | -0.167679017 | 3.873730249  | 0.346130629 | 0.556311703 | 0.999071534 | Pknx1         | Pknx1         | PKNOX1   | 13.82546661 | 17.66843323 | 17.36861685 | 14.91715291 | 15.95822503 | 19.50025929 | 8.542418739 | 13.88557293 | 12.96382809 | 11.56853672 |
| ENSMUSG000000040322  | 0.131688946  | 6.743925517  | 0.346040869 | 0.5563629   | 0.999071534 | Slc25a24      | Slc25a24      | SLC25A24 | 104.4980699 | 97.29496287 | 112.9633297 | 111.9133379 | 102.6820217 | 150.47215   | 92.08986262 | 96.50818599 | 110.0746858 | 92.35221685 |
| ENSMUSG000000058407  | 0.142987005  | 6.927292133  | 0.345843964 | 0.556475243 | 0.999071534 | Txndc9        | Txndc9        | TXNDC9   | 150.8870721 | 94.80478101 | 110.00124   | 131.0627993 | 112.2961983 | 107.2514261 | 150.7219185 | 139.4774714 | 93.49669957 | 121.6983919 |
| ENSMUSG000000028381  | -0.149377315 | 6.136384421  | 0.345833584 | 0.556481166 | 0.999071534 | Ugcg          | Ugcg          | UGCG     | 58.81086811 | 102.4531967 | 90.61301658 | 55.36692103 | 77.24042524 | 71.88901558 | 71.57511459 | 90.01443547 | 33.941659   | 58.30019634 |
| ENSMUSG000000038564  | 0.191511123  | 3.870682287  | 0.345793729 | 0.556503911 | 0.999071534 | Ift172        | Ift172        | IFT172   | 11.36916543 | 17.19411288 | 14.40652715 | 9.991023343 | 17.59328907 | 15.4983404  | 7.312828163 | 21.89913741 | 12.57098482 | 16.86261284 |
| ENSMUSG000000032491  | 0.153014928  | 5.209914193  | 0.345726606 | 0.556542221 | 0.999071534 | Nradd         | Nradd         |          | 36.98487768 | 51.70091872 | 27.73593078 | 26.98963945 | 38.78371903 | 41.47443207 | 57.85547237 | 38.61709089 | 20.74212495 | 31.56837986 |
| ENSMUSG0000000028049 | -0.126780547 | 5.508429022  | 0.345650568 | 0.556585625 | 0.999071534 | Scamp3        | Scamp3        | SCAMP3   | 54.03862583 | 52.94600966 | 45.77774983 | 42.32308499 | 51.53721854 | 63.66689133 | 51.6428042  | 36.47553486 | 26.2419308  | 37.12389184 |
| ENSMUSG0000000019179 | -0.151668128 | 7.956876121  | 0.345609562 | 0.556609035 | 0.999071534 | Mdh2          | Mdh2          | MDH2     | 296.4404617 | 245.2236237 | 271.9736902 | 235.8991623 | 310.596765  | 269.8748571 | 310.4392628 | 199.1647103 | 139.2236568 | 235.2922722 |
| ENSMUSG000000003660  | -0.136882332 | 6.546085635  | 0.34557529  | 0.556628602 | 0.999071534 | Snmp200       | Snmp200       | SNRNP200 | 89.69008287 | 125.0427037 | 90.88229746 | 78.81807304 | 125.0496978 | 135.9197177 | 62.83854997 | 88.70186887 | 62.4620808  | 88.95355069 |
| ENSMUSG000000032301  | 0.150975225  | 7.293714153  | 0.345523436 | 0.556658209 | 0.999071534 | Psm4          | Psm4          | PSMA4    | 153.4135533 | 111.9396038 | 187.1502126 | 174.7041443 | 141.0733254 | 172.3735606 | 202.5588686 | 122.2759407 | 146.0591298 | 150.8484901 |
| ENSMUSG000000096458  | 0.862594574  | 0.511626389  | 0.345481595 | 0.556682102 | 0.999071534 | Moap1         | Moap1         | MOAP1    | 3.228281543 | 1.422961066 | 0           | 0           | 0.130805123 | 5.311637791 | 3.688771728 | 0           | 0           | 0           |
| ENSMUSG000000002104  | 0.176272558  | 4.729963217  | 0.345111177 | 0.556893707 | 0.999071534 | Rapsn         | Rapsn         | RAPSN    | 24.00157147 | 25.55400914 | 30.15945871 | 20.74524986 | 28.51551686 | 19.06368632 | 14.10793398 | 29.56728962 | 28.28471584 | 40.65327592 |
| ENSMUSG000000027463  | -0.472456263 | 0.293123004  | 0.344732579 | 0.557110143 | 0.999071534 | Slc52a3       | Slc52a3       | SLC52A3  | 0.701800335 | 0.770770577 | 1.413724627 | 2.150845303 | 1.438856355 | 2.983248622 | 1.229590576 | 0.345412262 | 0.235705965 | 0.065358965 |
| ENSMUSG000000069631  | 0.159503573  | 4.065991537  | 0.344717543 | 0.557118742 | 0.999071534 | Strada        | Strada        | STRADA   | 16.35194782 | 13.99245048 | 21.34050985 | 14.22333184 | 15.63121222 | 18.69987551 | 13.78435751 | 17.82327272 | 11.78529826 | 23.07171447 |
| ENSMUSG0000000050335 | 0.224226331  | 9.927384851  | 0.344479902 | 0.557254682 | 0.999071534 | Lgal3         | Lgal3         | LGAL3    | 687.6941487 | 1177.203832 | 824.5380587 | 777.0795933 | 1210.339805 | 343.8739754 | 687.2117015 | 1728.995619 | 926.010169  | 1184.76195  |
| ENSMUSG000000082774  | -0.310707456 | 1.302399924  | 0.344430058 | 0.557283202 | 0.999071534 | Gm8805        | Gm8805        |          | 1.894860906 | 1.422961066 | 4.308494102 | 3.81601586  | 1.831271725 | 1.746291877 | 2.006174098 | 1.381649048 | 1.649941757 | 3.202589261 |
| ENSMUSG000000042608  | -0.154180223 | 4.227806652  | 0.344395248 | 0.557303122 | 0.999071534 | Stk40         | Stk40         | STK40    | 18.87842902 | 25.02039874 | 18.8496617  | 21.50845303 | 17.26627626 | 26.70371328 | 12.61948223 | 14.64547991 | 13.8280833  | 18.82338178 |
| ENSMUSG000000097640  | 0.448271179  | 0.00246574   | 0.344311846 | 0.557350854 | 0.999071534 | Gm20033       | Gm20033       |          | 0.280720134 | 0.5336104   | 0.269280881 | 1.665170557 | 1.046440986 | 0.582097292 | 0.711868228 | 0.759906976 | 1.571373102 | 1.045743432 |
| ENSMUSG000000070509  | -0.154763403 | 4.842462755  | 0.344288293 | 0.557364335 | 0.999071534 | Rgma          | Rgma          | RGMA     | 21.19437013 | 35.33686647 | 25.31240285 | 33.30341114 | 40.876601   | 35.43517266 | 16.37296925 | 30.39627905 | 24.98483232 | 23.52922722 |
| ENSMUSG000000020321  | -0.156938105 | 7.745145152  | 0.344238054 | 0.557393092 | 0.999071534 | Mdh1          | Mdh1          | MDH1     | 257.9818033 | 152.6125743 | 263.5586626 | 271.561565  | 223.6113581 | 212.2472252 | 231.3571742 | 146.592964  | 170.6511189 | 217.5146339 |
| ENSMUSG000000021418  | 0.235153915  | 2.967485872  | 0.344006526 | 0.557525658 | 0.999071534 | Rpp40         | Rpp40         | RPP40    | 12.00078574 | 4.209593153 | 7.337904017 | 6.383153803 | 6.867268968 | 9.459080998 | 10.48387754 | 4.490359406 | 9.821081887 | 5.424794054 |
| ENSMUSG000000052512  | 0.185189002  | 5.138755082  | 0.34361632  | 0.557749214 | 0.999071534 | Nav2          | Nav2          | NAV2     | 26.80877281 | 29.34857198 | 44.76794653 | 29.41801318 | 40.28797794 | 29.46867542 | 13.8490728  | 47.32147989 | 37.55581714 | 47.77740305 |
| ENSMUSG000000020190  | -0.143998963 | 6.7457087    | 0.343602847 | 0.557756936 | 0.999071534 | Mknk2         | Mknk2         | MKKN2    | 110.7440929 | 125.9320543 | 98.9607239  | 106.154623  | 143.6240253 | 109.3615288 | 59.34392412 | 121.861446  | 84.61844154 | 114.8357006 |
| ENSMUSG000000005846  | 0.144973649  | 7.745727755  | 0.343509103 | 0.557810671 | 0.999071534 | Rsl1d1        | Rsl1d1        | RS1D1    | 242.5421959 | 175.8542717 | 239.2560631 | 197.7390037 | 202.5517333 | 250.6656464 | 263.067668  | 188.9405073 | 189.5075961 | 196.7304832 |
| ENSMUSG000000002668  | 0.303256416  | 2.018250133  | 0.343210001 | 0.557982183 | 0.999071534 | Dennd1c       | Dennd1c       | DENND1C  | 4.280982046 | 4.683913508 | 3.433331237 | 0.624438959 | 5.428412612 | 5.74821076  | 3.041618794 | 5.595678644 | 1.649941757 | 5.424794054 |
| ENSMUSG000000020993  | 0.136826541  | 5.089453779  | 0.343118737 | 0.558034536 | 0.999071534 | Trappc6b      | Trappc6b      | TRAPPC6B | 29.05453389 | 37.82704833 | 35.4104359  | 26.4345826  | 39.5031472  | 33.90716727 | 49.31305363 | 34.40306129 | 24.12057712 | 30.26120057 |
| ENSMUSG000000020919  | -0.129815253 | 5.291386278  | 0.342774442 | 0.558232123 | 0.999071534 | Stat5b        | Stat5b        | STAT5B   | 41.33603976 | 42.92599215 | 41.19997485 | 40.72729654 | 45.65098799 | 48.53236174 | 27.11570797 | 41.65671879 | 22.15636074 | 43.79050622 |
| ENSMUSG000000024298  | -0.373808675 | 2.058360949  | 0.342732817 | 0.55825602  | 0.999071534 | Zfp871        | Zfp871        |          | 7.71980369  | 8.656346483 | 2.760129034 | 0.901967385 | 3.858751134 | 7.785551283 | 2.9769035   | 4.90485412  | 0.235705965 | 2.287563758 |

|                    |              |              |             |             |             |               |               |               |             |             |             |             |             |             |             |             |             |             |
|--------------------|--------------|--------------|-------------|-------------|-------------|---------------|---------------|---------------|-------------|-------------|-------------|-------------|-------------|-------------|-------------|-------------|-------------|-------------|
| ENSMUSG00000022385 | -0.269402291 | 3.693124074  | 0.342618732 | 0.558321527 | 0.999071534 | Gtse1         | Gtse1         | GTSE1         | 16.14140771 | 9.071376794 | 16.08953266 | 12.90507182 | 18.57432749 | 34.56202672 | 13.78435751 | 4.144947144 | 3.614158135 | 5.686229912 |
| ENSMUSG00000030630 | -0.157654169 | 4.961692061  | 0.342360715 | 0.558469732 | 0.999071534 | Fah           | Fah           | FAH           | 23.2295911  | 34.38822576 | 36.0836381  | 35.59302066 | 40.28797794 | 26.92199976 | 21.03247038 | 37.78810146 | 16.34228026 | 40.13040421 |
| ENSMUSG00000004460 | 0.139980562  | 6.924015186  | 0.342310621 | 0.558498515 | 0.999071534 | Dnajb11       | Dnajb11       | RP11-134F.2.8 | 121.6219981 | 116.3270671 | 118.9548293 | 120.1698085 | 121.8449723 | 162.4051445 | 177.3199041 | 84.76416909 | 91.37534588 | 107.7769325 |
| ENSMUSG00000025036 | 0.220983716  | 2.423792195  | 0.342244393 | 0.558536572 | 0.999071534 | Sfxn2         | Sfxn2         | SFXN2         | 3.438821644 | 4.506043375 | 5.99149961  | 4.856747458 | 6.278645913 | 6.112021568 | 6.730390522 | 5.319348834 | 4.242707375 | 4.901922338 |
| ENSMUSG00000045625 | 0.494376909  | -0.216396053 | 0.342046142 | 0.558650525 | 0.999071534 | Pigz          | Pigz          | PIGZ          | 0           | 0.948640711 | 0.538561763 | 0.971349492 | 0.654025616 | 1.528005392 | 0.388291761 | 0.828989429 | 1.099961171 | 0.326794823 |
| ENSMUSG00000020988 | 0.192402886  | 3.921149989  | 0.342035445 | 0.558656674 | 0.999071534 | Lzhgdh        | Lzhgdh        | LZHGDH        | 18.10644865 | 11.50226861 | 10.83855548 | 15.54159187 | 16.80845833 | 21.31931333 | 23.68579741 | 8.842553906 | 15.08518178 | 8.954178137 |
| ENSMUSG00000018160 | 0.143531433  | 6.260593078  | 0.341961332 | 0.558699286 | 0.999071534 | Med1          | Med1          | MED1          | 67.1622921  | 62.78815703 | 91.95942099 | 77.08352038 | 77.8290483  | 83.3854371  | 47.56574071 | 79.65206761 | 87.91832505 | 82.80980803 |
| ENSMUSG00000097354 | 0.244011631  | 2.710042033  | 0.341943252 | 0.558709682 | 0.999071534 | Z310001H17Rik | Z310001H17Rik |               | 5.895122818 | 3.616692709 | 5.587578288 | 8.880909638 | 6.278645913 | 3.492583753 | 6.212668174 | 8.428059192 | 5.264099892 | 9.477049853 |
| ENSMUSG00000097258 | -0.503726702 | -0.312902145 | 0.341929408 | 0.558717643 | 0.999071534 | Gm26767       | Gm26767       |               | 0.842160403 | 0.5336104   | 1.615685288 | 0.624438959 | 0.457817931 | 0.509335131 | 1.229590576 | 0.621742072 | 0.31427462  | 0           |
| ENSMUSG00000098354 | 0.544048535  | -0.407774212 | 0.341779443 | 0.55880389  | 0.999071534 | RP23-2C22.3   | Rpap3-ps2     |               | 0.421080201 | 0.415030311 | 0.471241542 | 1.040731598 | 0.327012808 | 0.145524323 | 0.323576467 | 0.552659619 | 2.121353688 | 0.130717929 |
| ENSMUSG00000042734 | -0.262911759 | 2.136715013  | 0.341668546 | 0.558867685 | 0.999071534 | Ttc9          | Ttc9          | TTC9          | 4.070441945 | 7.707705773 | 6.193460271 | 2.289609516 | 3.989556257 | 5.74821076  | 5.565515239 | 3.246875263 | 1.964216377 | 2.745076509 |
| ENSMUSG00000061436 | 0.194043331  | 3.862607478  | 0.341583861 | 0.558916411 | 0.999071534 | Hipk2         | Hipk2         | HIPK2         | 10.38664496 | 16.18618212 | 17.43593707 | 13.94580342 | 11.64165596 | 15.42557824 | 6.600959935 | 15.61263424 | 16.34228026 | 19.08481764 |
| ENSMUSG00000035093 | 0.154139175  | 6.232074928  | 0.34153913  | 0.558942151 | 0.999071534 | Secisbp2l     | Secisbp2l     | SECISBP2L     | 65.82887146 | 83.89541284 | 66.64701814 | 70.90851289 | 81.62239687 | 77.78275067 | 44.78298309 | 119.0290655 | 73.69739848 | 60.84919595 |
| ENSMUSG00000062116 | -0.196048221 | 3.096951002  | 0.341371874 | 0.559038419 | 0.999071534 | Zfp954        | Zfp954        |               | 9.193584394 | 10.5536279  | 6.664701814 | 9.921641237 | 10.33360473 | 6.985167506 | 9.772009315 | 8.151729382 | 5.264099892 | 7.712357812 |
| ENSMUSG00000020220 | -0.144709785 | 4.488407997  | 0.341286273 | 0.5590877   | 0.999071534 | Vps13d        | Vps13d        | VPS13D        | 21.82599043 | 28.5778014  | 27.1300488  | 18.24749402 | 26.2264272  | 25.32123221 | 15.14337867 | 24.5242706  | 15.08518178 | 23.07171447 |
| ENSMUSG00000031431 | -0.165383694 | 6.722032869  | 0.341174774 | 0.559151904 | 0.999071534 | Tsc22d3       | Tsc22d3       | TSC22D3       | 136.5001652 | 73.57894511 | 118.9548293 | 169.9167789 | 74.29730997 | 121.5855719 | 102.6384555 | 63.62493865 | 73.06884924 | 124.8356222 |
| ENSMUSG00000090761 | 0.26452857   | 2.609566012  | 0.341108555 | 0.559190041 | 0.999071534 | Gm17201       | Gm17201       |               | 7.439083555 | 2.193731643 | 6.328100712 | 6.175007483 | 6.017035667 | 5.893735083 | 2.394465859 | 6.286503168 | 7.85686551  | 8.235229528 |
| ENSMUSG00000017776 | 0.149283874  | 7.523139058  | 0.340677442 | 0.559438451 | 0.999071534 | Crk           | Crk           | CRK           | 211.241901  | 162.8104619 | 156.8561134 | 178.0344854 | 196.7963078 | 230.1467169 | 257.1785763 | 145.2113149 | 160.830037  | 145.2276191 |
| ENSMUSG00000028403 | 0.164937631  | 4.461159482  | 0.340604571 | 0.55948046  | 0.999071534 | Zdhhc21       | Zdhhc21       | ZDHHC21       | 25.40517214 | 23.12311732 | 22.55227381 | 16.9986161  | 19.42456079 | 34.12545375 | 34.42853613 | 20.79381817 | 11.62816095 | 14.37897219 |
| ENSMUSG00000042272 | 0.128746988  | 6.020941918  | 0.340486331 | 0.559548637 | 0.999071534 | Sestd1        | Sestd1        | SESTD1        | 56.77564714 | 63.38105747 | 61.46336117 | 65.01103384 | 74.62432278 | 67.15947509 | 54.23141594 | 82.62261306 | 60.81213905 | 58.82306805 |
| ENSMUSG00000042605 | 0.172404969  | 5.745844996  | 0.339709445 | 0.559996984 | 0.999071534 | Atxn2         | Atxn2         | ATXN2         | 36.63397751 | 44.23037313 | 67.99342255 | 46.34724717 | 66.18739234 | 43.43901043 | 26.20969386 | 64.31576318 | 60.81213905 | 71.56806613 |
| ENSMUSG00000033450 | -0.287573644 | 2.068242589  | 0.339662692 | 0.560023987 | 0.999071534 | Tagap         | Tagap         | TAGAP         | 7.509263589 | 3.260952442 | 5.789538949 | 3.052812688 | 3.662543449 | 7.057929668 | 5.371369359 | 1.381649048 | 1.414235792 | 3.398666154 |
| ENSMUSG00000077737 | 0.471614044  | 0.018168355  | 0.339600396 | 0.560059972 | 0.999071534 | Snord72       | Snord72       | SNORD72       | 0.912340436 | 0.177870133 | 1.144443746 | 1.040731598 | 0.523220493 | 0.727621615 | 0.19414588  | 0.967154334 | 0.392843275 | 2.679717545 |
| ENSMUSG00000074916 | -0.238394019 | 3.369662787  | 0.339466313 | 0.560137438 | 0.999071534 | Chst14        | Chst14        | CHST14        | 12.70258607 | 9.723567283 | 10.03071283 | 11.44804758 | 13.47292769 | 14.62519447 | 11.51932224 | 9.187966168 | 1.335667137 | 10.84958811 |
| ENSMUSG00000043895 | -0.193755791 | 5.124902438  | 0.339236858 | 0.560270054 | 0.999071534 | S1pr2         | S1pr2         | S1PR2         | 51.44196459 | 49.62576717 | 17.43593707 | 33.44217536 | 41.53062661 | 58.64630219 | 47.56574071 | 24.17885834 | 12.57098482 | 21.82989414 |
| ENSMUSG00000034751 | -0.141765032 | 5.956498307  | 0.33903008  | 0.560389614 | 0.999071534 | Mast4         | Mast4         | MAST4         | 44.49414127 | 78.79646902 | 67.58950122 | 67.37002546 | 78.94089185 | 85.8593506  | 35.26983495 | 62.51961942 | 44.94127072 | 60.45704217 |
| ENSMUSG00000017837 | -0.152091329 | 4.671681253  | 0.338923688 | 0.560451149 | 0.999071534 | Nkiras2       | Nkiras2       | NKIRAS2       | 35.01983674 | 34.62538593 | 17.16665619 | 18.94131509 | 33.81312435 | 29.97801055 | 27.30985385 | 22.79720929 | 18.14935933 | 18.88874074 |
| ENSMUSG00000036057 | 0.167914764  | 5.885475222  | 0.338844848 | 0.560496757 | 0.999071534 | Ptpn23        | Ptpn23        | PTPN23        | 52.77538522 | 65.1597588  | 60.31891743 | 47.73488931 | 63.04806938 | 54.35333466 | 25.04481858 | 94.29754752 | 53.26954816 | 69.86873306 |
| ENSMUSG00000027852 | 0.158113306  | 7.631627881  | 0.338738007 | 0.560558576 | 0.999071534 | Nras          | Nras          | NRAS          | 170.1865813 | 149.1737517 | 229.0233896 | 232.499439  | 186.7243134 | 202.7881442 | 160.6880737 | 178.3708921 | 226.9062759 | 222.2858383 |
| ENSMUSG00000018217 | -0.159287485 | 7.378340127  | 0.338660905 | 0.560603195 | 0.999071534 | Pmp22         | Pmp22         | PMP22         | 153.4837334 | 190.2617525 | 134.3711598 | 232.5688212 | 195.880672  | 128.2796908 | 146.0624174 | 204.2077293 | 103.6320561 | 172.7437432 |
| ENSMUSG00000035397 | 0.134139562  | 4.759147421  | 0.3385694   | 0.560656158 | 0.999071534 | Klf16         | Klf16         | KLF16         | 20.77328993 | 27.74774078 | 30.09213849 | 26.01828996 | 28.64632198 | 38.2001348  | 24.98010328 | 30.87985622 | 20.11357571 | 23.98673997 |
| ENSMUSG00000053289 | -0.154375095 | 4.569261126  | 0.338483458 | 0.560705909 | 0.999071534 | Ddx10         | Ddx10         | DDX10         | 23.15941107 | 31.72017376 | 25.91828483 | 23.3123878  | 25.11458365 | 39.07328074 | 25.7566868  | 15.47446934 | 12.33527885 | 19.67304832 |
| ENSMUSG00000002996 | -0.18530447  | 5.492016725  | 0.338382665 | 0.560764269 | 0.999071534 | Hbp1          | Hbp1          | HBP1          | 55.09132633 | 87.92713586 | 33.72743039 | 22.2022741  | 51.47181598 | 42.63862665 | 56.23759003 | 53.67706551 | 21.44924284 | 31.1108671  |
| ENSMUSG00000001630 | -0.155410555 | 4.775808454  | 0.338361902 | 0.560776293 | 0.999071534 | Stk38l        | Stk38l        | STK38L        | 24.00157147 | 43.75605277 | 31.97710466 | 21.50845303 | 28.31930917 | 29.25038893 | 20.64417862 | 35.9919577  | 19.48502646 | 19.41161246 |
| ENSMUSG00000031822 | -0.202200632 | 4.411104618  | 0.33833888  | 0.560789624 | 0.999071534 | Gse1          | Gse1          | GSE1          | 21.05401006 | 20.21790514 | 24.90848153 | 21.50845303 | 29.88897065 | 24.66637276 | 5.047792891 | 19.68849893 | 15.55659371 | 30.58799539 |
| ENSMUSG00000023977 | 0.145892167  | 5.809901635  | 0.338334058 | 0.560792417 | 0.999071534 | Ubr2          | Ubr2          | UBR2          | 33.19515587 | 65.81194929 | 59.44375456 | 49.95511672 | 67.56084613 | 66.72290212 | 36.04641847 | 72.74382237 | 50.75535119 | 56.79694015 |
| ENSMUSG00000036136 | 0.174425966  | 4.268361972  | 0.338121675 | 0.560915438 | 0.999071534 | Fam110c       | Fam110c       | FAM110C       | 21.61545033 | 23.53814763 | 15.41633046 | 14.8477708  | 18.24731469 | 12.44232962 | 17.861421   | 28.66921774 | 19.56359512 | 16.66653595 |
| ENSMUSG00000019977 | 0.119430687  | 6.392340506  | 0.337929815 | 0.561026616 | 0.999071534 | Hbs1l         | Hbs1l         | HBS1L         | 95.16412548 | 82.70961195 | 69.74374827 | 87.07454372 | 82.53803273 | 106.9603774 | 82.44728389 | 75.78345028 | 66.46908221 | 93.85547303 |
| ENSMUSG00000059033 | -0.357168276 | 0.780056107  | 0.337894807 | 0.561046907 | 0.999071534 | Rpl18a-ps1    | Rpl18a-ps1    |               | 2.035220973 | 1.126510844 | 3.366011017 | 0.901967385 | 1.831271725 | 0.800383777 | 2.135604685 | 1.796143762 | 0.392843275 | 1.568615148 |

|                     |              |              |             |             |             |           |           |          |             |             |             |             |             |             |             |             |              |              |
|---------------------|--------------|--------------|-------------|-------------|-------------|-----------|-----------|----------|-------------|-------------|-------------|-------------|-------------|-------------|-------------|-------------|--------------|--------------|
| ENSMUSG00000023033  | 0.711232483  | -0.751711892 | 0.337893583 | 0.561047617 | 0.999071534 | Scn8a     | Scn8a     | SCN8A    | 0.350900168 | 0           | 1.009803305 | 0.485674746 | 0           | 0.145524323 | 0           | 0.483577167 | 1.0999961171 | 0.915025503  |
| ENSMUSG00000036822  | 0.141845735  | 5.600873508  | 0.337650719 | 0.561188421 | 0.999071534 | Topors    | Topors    | TOPORS   | 32.2126354  | 43.69676273 | 52.03853032 | 61.61131062 | 47.74386997 | 47.73197796 | 39.92933608 | 60.03265113 | 49.3411154   | 44.3787369   |
| ENSMUSG00000021403  | -0.294811708 | 2.277302607  | 0.337471281 | 0.561292496 | 0.999071534 | Serpinp9b | Serpinp9b | SERPINB9 | 7.018003354 | 10.85007813 | 3.164050356 | 3.122194795 | 2.943115272 | 3.783632399 | 6.277383467 | 6.35558562  | 1.335667137  | 2.941153403  |
| ENSMUSG00000072082  | 0.235419356  | 4.02747356   | 0.337262602 | 0.561413578 | 0.999071534 | Ccnf      | Ccnf      | CCNF     | 21.61545033 | 14.11103057 | 16.62809442 | 9.64411281  | 15.63121222 | 43.58453475 | 24.20351976 | 7.529987311 | 7.149747614  | 8.692742279  |
| ENSMUSG00000032563  | 0.24853601   | 5.078199188  | 0.337262024 | 0.561413913 | 0.999071534 | MrpI3     | MrpI3     | MRLP3    | 54.6000661  | 38.41994878 | 16.2241731  | 23.65929833 | 27.86149124 | 52.24323197 | 85.29475681 | 18.30684988 | 11.23531768  | 17.38548456  |
| ENSMUSG00000022214  | -0.122975115 | 4.938581113  | 0.337138398 | 0.561485669 | 0.999071534 | Dcaf11    | Dcaf11    | DCAF11   | 39.30081878 | 32.60952442 | 29.08233519 | 30.87503741 | 33.61691666 | 35.07136185 | 26.01554798 | 29.91270189 | 23.9634398   | 26.73181648  |
| ENSMUSG00000021986  | 0.497089681  | -0.28925933  | 0.337119745 | 0.561496497 | 0.999071534 | Amer2     | Amer2     | AMER2    | 1.263240604 | 0.415030311 | 0           | 0.901967385 | 0.39241537  | 0.509335131 | 0.647152935 | 1.105319238 | 0.942823861  | 0.588230681  |
| ENSMUSG00000049606  | 0.137646935  | 4.995387326  | 0.337027811 | 0.56154987  | 0.999071534 | Zfp644    | Zfp644    | ZNF644   | 27.65093322 | 25.67258923 | 29.82285761 | 35.87054909 | 37.60647292 | 39.00051858 | 23.94465859 | 32.53783508 | 34.6487769   | 29.21545713  |
| ENSMUSG00000032228  | -0.134347085 | 6.043796282  | 0.337019469 | 0.561554714 | 0.999071534 | Tcf12     | Tcf12     | TCF12    | 64.98671106 | 97.11709274 | 59.64571522 | 57.03209158 | 80.24894308 | 99.61139912 | 62.38554291 | 60.58531075 | 37.47724848  | 52.41788953  |
| ENSMUSG000000084178 | 0.450278361  | -0.118202953 | 0.336981293 | 0.561576881 | 0.999071534 | Gm11759   | Gm11759   |          | 1.473780704 | 0.652190488 | 0.336601102 | 0.20814632  | 0.850233301 | 0.436572969 | 1.747312924 | 0.621742072 | 1.021392516  | 0.457512752  |
| ENSMUSG00000024921  | -0.13551113  | 4.691347113  | 0.336908943 | 0.561618896 | 0.999071534 | Smarca2   | Smarca2   | SMARCA2  | 27.44039311 | 28.28135118 | 24.97580175 | 29.76492371 | 29.03873735 | 25.61228086 | 21.09718567 | 18.99767441 | 21.5278115   | 30.65335435  |
| ENSMUSG00000070002  | -0.151995904 | 4.897146838  | 0.336897994 | 0.561625255 | 0.999071534 | Ell       | Ell       | ELL      | 29.40543405 | 36.10763704 | 32.17906532 | 30.7362732  | 33.68231922 | 25.39399437 | 16.11410808 | 39.79149258 | 21.05639957  | 32.35268743  |
| ENSMUSG00000028431  | 0.168189749  | 4.686732392  | 0.336791958 | 0.561686844 | 0.999071534 | Ikbkap    | Ikbkap    | IKBKAP   | 33.82677617 | 30.11934256 | 20.1960661  | 18.0393477  | 23.80653242 | 48.6051239  | 32.68122321 | 16.51070612 | 12.72812213  | 26.66645752  |
| ENSMUSG00000006392  | 0.155340853  | 5.399552196  | 0.336786474 | 0.561690029 | 0.999071534 | Med8      | Med8      | MED8     | 60.70572901 | 29.70431225 | 42.00781749 | 34.20537853 | 40.81119844 | 53.77123736 | 68.53349579 | 26.32041436 | 32.29171725  | 36.01278944  |
| ENSMUSG00000022894  | -0.214640145 | 3.729341827  | 0.33675634  | 0.561707535 | 0.999071534 | Adamts5   | Adamts5   | ADAMTS5  | 9.404124495 | 11.6208487  | 21.54247051 | 18.17811192 | 11.90326621 | 9.531843159 | 7.830550511 | 22.03730231 | 8.563983406  | 9.999921569  |
| ENSMUSG00000046562  | -0.135222301 | 5.330699568  | 0.336626176 | 0.561783161 | 0.999071534 | Unc119b   | Unc119b   | UNC119B  | 48.28386308 | 56.26625214 | 39.3823289  | 33.02588272 | 41.92304198 | 56.1723887  | 48.40703952 | 31.43251584 | 22.94024729  | 37.017871332 |
| ENSMUSG00000028849  | -0.139049896 | 6.984598468  | 0.336514119 | 0.561848283 | 0.999071534 | Map7d1    | Map7d1    | MAP7D1   | 169.0637008 | 126.821405  | 137.8718113 | 105.460802  | 152.1917608 | 194.3477334 | 109.4335613 | 97.88983504 | 74.24737907  | 124.1166736  |
| ENSMUSG00000030770  | -0.144467749 | 7.643987438  | 0.336499711 | 0.561856657 | 0.999071534 | Parva     | Parva     | PARVA    | 200.5745359 | 240.30255   | 200.6815768 | 210.3665471 | 238.1307268 | 296.9423812 | 165.3475748 | 172.4298012 | 153.2874461  | 146.6001574  |
| ENSMUSG00000007817  | -0.182534149 | 6.928036882  | 0.336276738 | 0.561986284 | 0.999071534 | Zmiz1     | Zmiz1     | ZMIZ1    | 85.47928085 | 162.0989814 | 141.3724627 | 109.7624926 | 174.2978267 | 111.9809666 | 47.43631012 | 173.6042029 | 88.15403102  | 125.3584939  |
| ENSMUSG00000030270  | 0.425129039  | 0.028319714  | 0.336237084 | 0.562009343 | 0.999071534 | Cpne9     | Cpne9     | CPNE9    | 0.842160403 | 0.5336104   | 1.009803305 | 1.040731598 | 0.523220493 | 0.291048646 | 0.453007054 | 1.312566595 | 1.571373102  | 1.045743432  |
| ENSMUSG00000044534  | -0.558098221 | -0.329808845 | 0.335921462 | 0.562192945 | 0.999071534 | Ackr2     | Ackr2     | ACKR2    | 0.842160403 | 1.660121243 | 0.673202203 | 0           | 0.915635862 | 0.436572969 | 0.323576467 | 1.036236786 | 0            | 0.784307574  |
| ENSMUSG00000020150  | 0.172872108  | 4.215841659  | 0.335887177 | 0.562212896 | 0.999071534 | Gamt      | Gamt      | GAMT     | 11.86042567 | 14.22961066 | 19.59018412 | 21.71659935 | 22.23687094 | 17.0263458  | 18.18499747 | 13.0565835  | 21.76351746  | 22.41812483  |
| ENSMUSG00000019647  | -0.200221448 | 3.189460908  | 0.335869997 | 0.562222895 | 0.999071534 | Sema6a    | Sema6a    | SEMA6A   | 8.281243958 | 8.656346483 | 9.424830848 | 9.574730704 | 13.99614818 | 8.440410737 | 4.983077598 | 8.428059192 | 8.799689371  | 9.150255031  |
| ENSMUSG000000087142 | 0.34515782   | 1.015840648  | 0.335763822 | 0.56228469  | 0.999071534 | Gm12454   | Gm12454   |          | 1.333420637 | 1.245090933 | 1.817645949 | 1.734552664 | 2.550699902 | 1.018670261 | 0.647152935 | 1.796143762 | 3.299883514  | 2.941153403  |
| ENSMUSG00000026970  | 0.18587718   | 8.552213962  | 0.335445087 | 0.562470279 | 0.999071534 | Rbms1     | Rbms1     | RBMS1    | 251.7357803 | 292.5963691 | 495.4768217 | 386.9440082 | 389.668462  | 325.1740998 | 223.5266237 | 430.2455135 | 501.3465882  | 380.3238145  |
| ENSMUSG000000025404 | -0.156843663 | 5.993367174  | 0.335245405 | 0.562586607 | 0.999071534 | R3hdm2    | R3hdm2    | R3HDM2   | 50.88052432 | 83.42109248 | 64.22349021 | 57.30962001 | 93.19865027 | 55.73581573 | 35.39926553 | 90.42893018 | 43.99844685  | 62.94068282  |
| ENSMUSG00000032327  | 0.443912533  | 0.690012848  | 0.335209313 | 0.562607637 | 0.999071534 | Stra6     | Stra6     | STRA6    | 0.491260235 | 2.312311732 | 1.077123525 | 1.387642131 | 1.177246109 | 3.783632399 | 2.78275762  | 0           | 0.864255206  | 1.30717929   |
| ENSMUSG00000031753  | -0.123617902 | 6.003104223  | 0.335202517 | 0.562611598 | 0.999071534 | Cog4      | Cog4      | COG4     | 61.82860955 | 73.46036502 | 63.01172624 | 65.08041594 | 83.51907116 | 60.53811839 | 51.06036656 | 69.84235937 | 45.4912513   | 68.4961948   |
| ENSMUSG00000015697  | 0.123408951  | 5.463508365  | 0.335171087 | 0.562629913 | 0.999071534 | Setdb1    | Setdb1    | SETDB1   | 52.00340485 | 47.55061561 | 37.90128405 | 35.59302066 | 46.37041617 | 65.92251834 | 37.79373139 | 37.51177165 | 37.47724848  | 46.01271101  |
| ENSMUSG00000032308  | 0.221609104  | 3.802726396  | 0.335133656 | 0.562651728 | 0.999071534 | Ulk3      | Ulk3      | ULK3     | 13.40438641 | 17.66843323 | 14.47384737 | 8.464616999 | 12.55729183 | 9.240794513 | 6.795105815 | 28.32380548 | 12.17814154  | 13.52930565  |
| ENSMUSG00000038543  | -0.187488627 | 3.812801225  | 0.334997276 | 0.562731222 | 0.999071534 | BC028528  | BC028528  | C1orf54  | 17.68536845 | 11.02794826 | 15.14704958 | 19.14946141 | 13.60373281 | 8.804221544 | 12.10175988 | 17.06336574 | 7.6997282    | 16.73189491  |
| ENSMUSG00000043940  | 0.133887105  | 5.15915301   | 0.334921102 | 0.562775633 | 0.999071534 | Wdfy3     | Wdfy3     | WDFY3    | 34.80929664 | 44.64540344 | 52.03853032 | 53.90989679 | 55.98459273 | 66.79566428 | 33.7166679  | 45.11084141 | 49.49825271  | 52.22181264  |
| ENSMUSG00000040659  | -0.133231574 | 6.522517273  | 0.334559434 | 0.562986582 | 0.999071534 | Efh2      | Efh2      | EFHD2    | 114.9548949 | 105.8327293 | 80.85158463 | 87.14392583 | 111.3151598 | 147.2706149 | 89.56596618 | 68.80612258 | 62.85492408  | 66.86222069  |
| ENSMUSG00000055943  | 0.140654764  | 6.291568596  | 0.334391121 | 0.563084806 | 0.999071534 | Emc7      | Emc7      | EMC7     | 79.44379797 | 75.77267675 | 72.97511885 | 88.11527532 | 68.73809224 | 73.27149665 | 128.6540034 | 70.53318389 | 51.54103774  | 73.659553    |
| ENSMUSG000000008035 | -0.154482481 | 5.540357928  | 0.334087156 | 0.563262276 | 0.999071534 | Mid1p1    | Mid1p1    | MID1P1   | 58.31960787 | 40.49510033 | 54.9332998  | 44.61269451 | 55.98459273 | 79.38351822 | 56.17287474 | 23.34986891 | 23.0991846   | 39.93432731  |
| ENSMUSG00000016194  | -0.222622741 | 4.448162268  | 0.33397522  | 0.563327657 | 0.999071534 | Hsd11b1   | Hsd11b1   | HSD11B1  | 15.65014748 | 38.41994878 | 24.5045602  | 21.85536356 | 20.79801459 | 13.02442691 | 16.63183042 | 44.07460463 | 10.8424744   | 10.98030604  |
| ENSMUSG00000017119  | -0.16987243  | 6.859364018  | 0.333756764 | 0.563455298 | 0.999071534 | Nbr1      | Nbr1      | NBR1     | 90.8129634  | 133.0468596 | 132.0822723 | 121.2799222 | 160.4324836 | 92.8445181  | 53.00182536 | 163.7944946 | 94.91093536  | 113.7899572  |
| ENSMUSG00000020483  | -0.131288331 | 7.091195397  | 0.333545288 | 0.563578914 | 0.999071534 | DynlI2    | DynlI2    | DYNLL2   | 140.0793469 | 135.1813012 | 154.4999057 | 144.9392206 | 164.4874424 | 165.8249661 | 110.6631518 | 111.3609133 | 117.4601394  | 124.7049043  |
| ENSMUSG000000063767 | 0.319229732  | 2.578266081  | 0.33318814  | 0.563787799 | 0.999071534 | S100a7a   | S100a7a   |          | 3.509001677 | 6.877645151 | 5.049016526 | 6.452535909 | 4.970594681 | 1.673529715 | 1.359021163 | 12.78025369 | 5.106962581  | 9.215613995  |

|                     |              |              |             |             |             |               |               |          |             |             |             |             |             |             |             |             |             |             |
|---------------------|--------------|--------------|-------------|-------------|-------------|---------------|---------------|----------|-------------|-------------|-------------|-------------|-------------|-------------|-------------|-------------|-------------|-------------|
| ENSMUSG00000043085  | -0.443195488 | -0.139290084 | 0.333184677 | 0.563789825 | 0.999071534 | Tmem82        | Tmem82        | TMEM82   | 2.035220973 | 1.007930755 | 1.009803305 | 0.346910533 | 0.261610246 | 1.091432423 | 0.323576467 | 0.967154334 | 0.392843275 | 0.457512752 |
| ENSMUSG00000036411  | 0.260467349  | 1.973286997  | 0.332961447 | 0.563920462 | 0.999071534 | 9530077C05Rik | 9530077C05Rik | KIAA0895 | 4.210802013 | 3.083082309 | 2.490848153 | 4.02416218  | 4.120361381 | 3.638108076 | 3.882917609 | 4.421276953 | 5.421237202 | 2.0261279   |
| ENSMUSG00000021236  | 0.142427102  | 4.297277658  | 0.332924042 | 0.563942358 | 0.999071534 | Entpd5        | Entpd5        | ENTPD5   | 20.63292986 | 19.86216488 | 15.887752   | 18.31687613 | 21.77905301 | 20.88274036 | 17.27898336 | 17.89235517 | 20.19214436 | 21.69917622 |
| ENSMUSG00000001829  | -0.146613081 | 4.494022264  | 0.332810184 | 0.564009017 | 0.999071534 | Clpb          | Clpb          | CLPB     | 30.73885469 | 22.8266671  | 29.82285761 | 16.51294136 | 22.825494   | 26.8492376  | 23.68579741 | 14.57639746 | 18.69933991 | 19.47697142 |
| ENSMUSG00000026885  | 0.281944044  | 1.800066894  | 0.332739945 | 0.564050146 | 0.999071534 | Ttl11         | Ttl11         | TTL11    | 2.035220973 | 3.49811262  | 2.88887492  | 4.787365352 | 2.943115272 | 6.912405345 | 3.882917609 | 1.588896405 | 3.457020824 | 2.418281687 |
| ENSMUSG00000038456  | -0.200881502 | 3.364769438  | 0.332722863 | 0.564060149 | 0.999071534 | Dennd2a       | Dennd2a       | DENND2A  | 11.9306057  | 11.44297857 | 12.31960032 | 11.51742969 | 9.156358623 | 17.46291877 | 4.918362304 | 8.289894287 | 5.264099892 | 11.63389568 |
| ENSMUSG00000073471  | 0.196819361  | 3.318083561  | 0.332435438 | 0.564228521 | 0.999071534 | Rsph3a        | Rsph3a        | RSPH3    | 7.649623656 | 9.901437416 | 10.9058757  | 4.995511672 | 14.51936867 | 11.13261071 | 10.9368846  | 7.944482025 | 8.092571475 | 12.81035704 |
| ENSMUSG00000097220  | -0.570582751 | -0.542907168 | 0.332411795 | 0.564242375 | 0.999071534 | Gm26599       | Gm26599       |          | 0.771980369 | 0.296450222 | 1.009803305 | 0.624438959 | 0.719428178 | 0.072762162 | 0           | 0.898071881 | 0.078568655 | 1.045743432 |
| ENSMUSG00000035783  | -0.198187871 | 8.726904285  | 0.332354992 | 0.564275663 | 0.999071534 | Acta2         | Acta2         | ACTA2    | 288.3697578 | 465.901169  | 696.293039  | 520.7127097 | 364.5538783 | 859.9032249 | 336.3900955 | 275.77715   | 304.5321072 | 217.187839  |
| ENSMUSG00000032422  | -0.137843002 | 4.971987377  | 0.332331323 | 0.564289535 | 0.999071534 | Snx14         | Snx14         | SNX14    | 36.49361744 | 40.25794015 | 28.1398521  | 33.37279325 | 31.78564494 | 37.03594021 | 42.12965606 | 25.56050739 | 19.95643839 | 21.1763045  |
| ENSMUSG00000022771  | -0.114016829 | 5.895370408  | 0.332268769 | 0.564326199 | 0.999071534 | Ppil2         | Ppil2         | PPII2    | 69.96949344 | 62.01738645 | 55.606502   | 62.02760325 | 71.22338958 | 60.97469136 | 57.27303473 | 55.88770399 | 40.69856334 | 61.89493939 |
| ENSMUSG00000040813  | -0.123459691 | 6.140491599  | 0.332242932 | 0.564341344 | 0.999071534 | Tex264        | Tex264        | TEX264   | 70.03967347 | 75.95054689 | 75.60060744 | 77.98548776 | 81.2299815  | 63.95793998 | 56.75531238 | 81.44821137 | 50.0482333  | 72.15629681 |
| ENSMUSG00000030894  | -0.161923288 | 6.771818034  | 0.332227735 | 0.564350252 | 0.999071534 | Tpp1          | Tpp1          | TPP1     | 77.408577   | 166.0121243 | 93.70974672 | 97.20433128 | 166.3187141 | 91.38927487 | 88.59523677 | 150.1852515 | 73.61882983 | 90.65288377 |
| ENSMUSG00000042747  | 0.128465284  | 6.444964556  | 0.332185707 | 0.56437489  | 0.999071534 | Krtcap2       | Krtcap2       | KRTCAP2  | 80.21577834 | 73.75681524 | 102.8652967 | 90.82117747 | 82.79964298 | 82.65781549 | 102.3795943 | 100.2386384 | 62.14780618 | 91.04503756 |
| ENSMUSG00000074682  | 0.269903436  | 1.871793103  | 0.332165857 | 0.564386528 | 0.999071534 | Zcchc3        | Zcchc3        | ZCCHC3   | 2.807201342 | 4.387463286 | 4.577774983 | 1.040731598 | 3.924153696 | 5.384399953 | 2.847472913 | 4.006782239 | 3.299883514 | 3.267948225 |
| ENSMUSG00000067235  | -0.237198632 | 3.068935525  | 0.332165315 | 0.564386846 | 0.999071534 | H2-Q10        | H2-Q10        |          | 11.36916543 | 9.367827016 | 11.915679   | 4.995511672 | 9.0255535   | 9.459080998 | 2.265035272 | 10.22420295 | 5.814080477 | 9.019537102 |
| ENSMUSG00000028437  | -0.119140816 | 5.590335985  | 0.332036377 | 0.564462449 | 0.999071534 | Ubap1         | Ubap1         | UBAP1    | 53.05610536 | 54.0725205  | 48.13395754 | 45.02898715 | 60.10495411 | 50.20589145 | 42.58266311 | 53.53890061 | 28.67755911 | 49.3460182  |
| ENSMUSG00000050014  | -0.219886851 | 4.074146203  | 0.33201783  | 0.564473325 | 0.999071534 | Apol10b       | Apol10b       | APOL1    | 15.08870721 | 19.03210425 | 24.5045602  | 17.34552664 | 17.26627626 | 41.61995639 | 15.20809397 | 7.529987311 | 5.735511822 | 10.98030604 |
| ENSMUSG00000082305  | 0.372218453  | 0.635596193  | 0.331944251 | 0.564516479 | 0.999071534 | Gm2420        | Gm2420        |          | 2.596661241 | 1.067220799 | 1.548365068 | 0.346910533 | 0.981038424 | 0.873145938 | 0.970729402 | 1.865226215 | 2.278490998 | 1.437897219 |
| ENSMUSG00000043932  | -0.683628583 | -0.253761494 | 0.331849549 | 0.564572031 | 0.999071534 | Klr12         | Klr12         |          | 3.017741442 | 1.007930755 | 0.134640441 | 0           | 0.39241537  | 0.873145938 | 1.359021163 | 0.483577167 | 0           | 0           |
| ENSMUSG00000074735  | 0.287594083  | 1.326030274  | 0.331719777 | 0.564648172 | 0.999071534 | Gm21994       | Gm21994       |          | 2.38612114  | 2.371601776 | 1.683005509 | 3.330341114 | 1.24264867  | 1.8918162   | 3.494625848 | 2.279720929 | 2.121353688 | 2.679717545 |
| ENSMUSG00000029287  | -0.135663289 | 6.916768556  | 0.331648514 | 0.564689992 | 0.999071534 | Tgfbf3        | Tgfbf3        | TGFBR3   | 106.3227508 | 152.6125743 | 120.2339135 | 136.8215141 | 139.1112485 | 103.9771288 | 105.1623519 | 132.0165665 | 104.0248993 | 103.0057281 |
| ENSMUSG00000032046  | -0.145381128 | 5.444173742  | 0.33164659  | 0.564691121 | 0.999071534 | Abhd12        | Abhd12        | ABHD12   | 49.89800385 | 60.95016565 | 36.68952009 | 36.28684173 | 54.02251588 | 57.91868057 | 56.30230533 | 35.78471034 | 18.93504588 | 36.47030219 |
| ENSMUSG00000026456  | 0.13924981   | 5.212420416  | 0.331612378 | 0.5647112   | 0.999071534 | Cyb5r1        | Cyb5r1        | CYB5R1   | 49.33656358 | 40.49510033 | 30.7653407  | 24.70002993 | 38.45670622 | 45.91292392 | 52.48410301 | 32.33058772 | 22.70634132 | 36.79709702 |
| ENSMUSG00000029381  | 0.254876906  | 1.811821275  | 0.331527369 | 0.564761099 | 0.999071534 | Shroom3       | Shroom3       | SHROOM3  | 3.719541778 | 4.565333419 | 1.817645949 | 2.844666369 | 3.073920395 | 5.166113468 | 4.400639957 | 3.385040167 | 2.357059653 | 2.810435474 |
| ENSMUSG00000026070  | 0.364911468  | 0.60444699   | 0.33140625  | 0.564832208 | 0.999071534 | Il18r1        | Il18r1        | IL18R1   | 1.473780704 | 1.897281421 | 2.086926831 | 0.277528426 | 0.588623054 | 2.764962138 | 1.164875283 | 1.588896405 | 1.021392516 | 1.241820326 |
| ENSMUSG00000061132  | -0.233837164 | 2.917223194  | 0.331145124 | 0.564985574 | 0.999071534 | Blnk          | Blnk          | BLNK     | 8.632144126 | 8.359896261 | 9.82875217  | 7.493267507 | 7.325086899 | 15.35281608 | 8.477703446 | 4.352194501 | 2.907040239 | 3.986896835 |
| ENSMUSG00000086477  | -0.378063884 | 0.55177322   | 0.33101824  | 0.565060126 | 0.999071534 | Gm15506       | Gm15506       |          | 2.105401006 | 1.067220799 | 1.548365068 | 1.595788451 | 1.504258917 | 0.363810808 | 0.582437641 | 2.694215643 | 0.628549241 | 1.176461361 |
| ENSMUSG00000063488  | -0.634115265 | -0.390206027 | 0.330934536 | 0.565109317 | 0.999071534 | Zkscan7       | Zkscan7       | ZKSCAN7  | 0.070180034 | 1.837991377 | 0.336601102 | 0           | 1.700466601 | 0.582097292 | 0.647152935 | 0.138164905 | 0           | 1.045743432 |
| ENSMUSG00000079317  | -0.153350709 | 4.804840156  | 0.330841006 | 0.565164292 | 0.999071534 | Trappc2       | Trappc2       | TRAPPC2  | 32.07227533 | 33.02455473 | 28.34181276 | 29.07110264 | 29.69276296 | 32.37916188 | 41.28835724 | 18.37593234 | 12.09957289 | 26.40502166 |
| ENSMUSG00000042660  | 0.149811597  | 4.524123956  | 0.330588925 | 0.565312513 | 0.999071534 | Wdr55         | Wdr55         | WDR55    | 18.87842902 | 23.83459785 | 27.26468924 | 15.26406344 | 27.86149124 | 29.46867542 | 32.22821615 | 20.1720761  | 16.49941757 | 19.41161246 |
| ENSMUSG000000001763 | 0.43806018   | -0.159440755 | 0.330514045 | 0.565356557 | 0.999071534 | Tspan33       | Tspan33       | TSPAN33  | 0.98252047  | 0.948640711 | 0.134640441 | 0.901967385 | 0.39241537  | 1.018670261 | 0.258861174 | 0.898071881 | 0.942823861 | 1.111102397 |
| ENSMUSG000000001942 | -0.218830583 | 3.284308911  | 0.33033199  | 0.565463666 | 0.999071534 | Siae          | Siae          | SIAE     | 8.000523824 | 18.20204363 | 8.549667983 | 11.23990126 | 7.521294584 | 12.73337827 | 10.67802342 | 8.773471454 | 2.985608894 | 9.28097296  |
| ENSMUSG000000024019 | -0.120734556 | 5.469933214  | 0.330202828 | 0.56553968  | 0.999071534 | Cmtr1         | Cmtr1         | CMTR1    | 57.3370874  | 50.10008752 | 44.16206454 | 42.94752395 | 44.86615725 | 59.59221029 | 36.30527964 | 33.85040167 | 31.74173666 | 46.4048648  |
| ENSMUSG00000030403  | 0.187353427  | 7.059737751  | 0.330201655 | 0.565540371 | 0.999071534 | Vasp          | Vasp          | VASP     | 199.2411152 | 159.6680896 | 93.77706694 | 108.5829967 | 87.96644535 | 268.2013274 | 178.2906335 | 69.84235937 | 105.6748411 | 89.99929412 |
| ENSMUSG00000030060  | -0.152553335 | 4.78077912   | 0.329987266 | 0.565666586 | 0.999071534 | Hmc5          | Hmc5          | HMCES    | 27.79129328 | 17.54985314 | 38.7091267  | 30.59750899 | 34.66335765 | 29.83248622 | 27.24513855 | 18.8595095  | 16.89226085 | 33.85594361 |
| ENSMUSG00000055371  | -0.135849307 | 5.072975309  | 0.329954114 | 0.565686109 | 0.999071534 | Stam2         | Stam2         | STAM2    | 34.38821644 | 41.20658086 | 36.21827854 | 27.05902155 | 44.14672908 | 37.90908615 | 36.04641847 | 38.54800844 | 22.47063536 | 20.58807382 |
| ENSMUSG00000035284  | -0.236503352 | 3.750425428  | 0.329939831 | 0.56569452  | 0.999071534 | Vps13c        | Vps13c        | VPS13C   | 12.1411458  | 30.47508283 | 5.85685917  | 12.6969255  | 13.86534306 | 22.92008088 | 9.836724609 | 16.16529386 | 5.578374512 | 7.25484506  |
| ENSMUSG00000049232  | 0.15818256   | 3.81023388   | 0.329906686 | 0.56571404  | 0.999071534 | Tigd2         | Tigd2         | TIGD2    | 13.68510654 | 15.05967128 | 14.54116759 | 12.55816129 | 12.36108414 | 16.73529715 | 15.9199622  | 10.98410993 | 10.13535651 | 17.71227938 |

|                    |              |              |             |             |             |               |               |          |             |             |             |             |             |             |             |             |              |             |
|--------------------|--------------|--------------|-------------|-------------|-------------|---------------|---------------|----------|-------------|-------------|-------------|-------------|-------------|-------------|-------------|-------------|--------------|-------------|
| ENSMUSG00000030600 | -0.510027518 | -0.02429884  | 0.329634582 | 0.565874339 | 0.999071534 | Lrfn1         | Lrfn1         | LRFN1    | 1.473780704 | 0.474320355 | 2.086926831 | 0           | 1.177246109 | 1.236956746 | 0.711868228 | 1.036236786 | 0.078568655  | 0.457512752 |
| ENSMUSG00000030763 | -0.141410113 | 4.255013717  | 0.329564643 | 0.565915555 | 0.999071534 | Lcmt1         | Lcmt1         | LCMT1    | 19.15914916 | 20.87009563 | 19.25358302 | 18.24749402 | 25.96481695 | 20.44616739 | 18.70271982 | 16.23437631 | 12.02100423  | 20.52271485 |
| ENSMUSG00000010095 | -0.153681121 | 7.607050064  | 0.32950034  | 0.565953454 | 0.999071534 | Slc3a2        | Slc3a2        | SLC3A2   | 164.4318186 | 266.7459098 | 219.1946374 | 212.8643029 | 200.4588513 | 180.7412092 | 133.2487893 | 245.4499534 | 147.7090716  | 177.9071014 |
| ENSMUSG00000031146 | 0.155548398  | 8.497151698  | 0.329361629 | 0.566035226 | 0.999071534 | Plp2          | Plp2          | PLP2     | 271.6669098 | 326.1545343 | 398.337438  | 365.296791  | 409.8778535 | 299.4162947 | 380.3964951 | 447.9997038 | 281.9043345  | 411.6307585 |
| ENSMUSG00000076609 | -0.376561771 | 0.464362304  | 0.329243083 | 0.566105128 | 0.999071534 | Igkc          | Igkc          | IGKC     | 2.877381375 | 1.541541155 | 1.481044848 | 0.901967385 | 0.523220493 | 2.473913492 | 0.647152935 | 0.690824524 | 0.4741411931 | 1.241820326 |
| ENSMUSG00000035364 | -0.44661431  | 0.021893507  | 0.329164722 | 0.566151345 | 0.999071534 | 4930524J08Rik | 4930524J08Rik |          | 0.561440268 | 0.237160178 | 2.01960661  | 1.595788451 | 0.784830739 | 1.45524323  | 1.164875283 | 0.552659619 | 0.15713731   | 0.457512752 |
| ENSMUSG00000096549 | -0.492045678 | -0.319292318 | 0.329135819 | 0.566168393 | 0.999071534 | Prickle4      | Prickle4      | PRICKLE4 | 0.912340436 | 1.007930755 | 0.336601102 | 0.901967385 | 0.850233301 | 0.9459081   | 1.229590576 | 0.483577167 | 0            | 0.130717929 |
| ENSMUSG00000026575 | 0.14764155   | 4.346280792  | 0.329081983 | 0.56620015  | 0.999071534 | Nme7          | Nme7          | NME7     | 20.98383003 | 16.00831199 | 15.61829112 | 19.35760773 | 27.79608868 | 24.0115133  | 22.39149154 | 15.47446934 | 16.81369219  | 24.37889376 |
| ENSMUSG00000070942 | 0.16795294   | 3.882072489  | 0.328781061 | 0.566377726 | 0.999071534 | Il1rl2        | Il1rl2        | IL1RL2   | 8.281243958 | 14.94109119 | 18.44574037 | 14.22333184 | 15.36960198 | 17.53568093 | 13.26663516 | 12.64208879 | 13.67094599  | 17.51620249 |
| ENSMUSG00000082107 | -0.481745197 | -0.432901382 | 0.328616117 | 0.566475107 | 0.999071534 | Gm16216       | Gm16216       |          | 0.561440268 | 0.889350666 | 0.471241542 | 0.069382107 | 1.700466601 | 1.164194584 | 0.388291761 | 0.345412262 | 0.31427462   | 0.326794823 |
| ENSMUSG00000038056 | 0.17291481   | 4.907650308  | 0.328504319 | 0.566541129 | 0.999071534 | Kmt2c         | Kmt2c         | KMT2C    | 22.45761073 | 22.94524719 | 31.50586312 | 36.84189858 | 31.26242444 | 25.68504302 | 14.43151045 | 39.86057503 | 32.84169783  | 36.33958426 |
| ENSMUSG00000051716 | 0.481881301  | -0.209578796 | 0.328443273 | 0.566577186 | 0.999071534 | Apon          | Apon          |          | 0.210540101 | 0.118580089 | 0.807842644 | 1.318260024 | 0.719428178 | 0.363810808 | 0.647152935 | 0.414494714 | 1.649941757  | 0.849666539 |
| ENSMUSG00000031383 | 0.198978149  | 4.418959542  | 0.328442923 | 0.566577393 | 0.999071534 | Dusp9         | Dusp9         | DUSP9    | 27.22985301 | 16.30476221 | 23.1581558  | 13.25198235 | 23.47951961 | 50.4969401  | 28.28058325 | 9.602460883 | 11.70672961  | 16.60117698 |
| ENSMUSG00000037275 | 0.158826752  | 4.742111744  | 0.328432123 | 0.566583772 | 0.999071534 | Gemin5        | Gemin5        | GEMIN5   | 35.72163707 | 25.96903945 | 23.4947569  | 18.80255087 | 27.40367331 | 54.49885898 | 26.66270091 | 15.8198816  | 20.11357571  | 24.1174579  |
| ENSMUSG00000080783 | -0.456636058 | 0.519916232  | 0.328282009 | 0.566672459 | 0.999071534 | Gm8250        | Gm8250        |          | 2.245761073 | 2.193731643 | 2.288887492 | 0           | 1.177246109 | 0.582097292 | 0.323576467 | 0.967154334 | 1.257098482  | 1.960768935 |
| ENSMUSG00000018001 | -0.155048911 | 5.171304419  | 0.328130384 | 0.566762065 | 0.999071534 | Cyth3         | Cyth3         | CYTH3    | 49.05584345 | 54.54684085 | 35.27579546 | 25.393851   | 33.28990385 | 56.60896166 | 40.12348196 | 28.39288793 | 15.55659371  | 30.26120057 |
| ENSMUSG00000038803 | 0.142947678  | 6.600832821  | 0.32792011  | 0.566886377 | 0.999071534 | Ost4          | Ost4          | OST4     | 90.95332347 | 99.19224429 | 84.15027543 | 91.65376275 | 112.8848213 | 86.36868573 | 155.5108502 | 94.85020714 | 55.31233319  | 102.2867795 |
| ENSMUSG00000015759 | 0.197196     | 7.151675698  | 0.32754027  | 0.567111069 | 0.999071534 | Cnih1         | Cnih1         | CNIH1    | 189.8369907 | 139.5094745 | 89.60321327 | 137.4459531 | 131.7861616 | 143.6325068 | 313.6750275 | 74.33271878 | 76.997282    | 136.0773641 |
| ENSMUSG00000040146 | 0.237167221  | 3.141514761  | 0.327234453 | 0.567292098 | 0.999071534 | Rgl3          | Rgl3          | RGL3     | 7.018003354 | 7.233385418 | 8.482347763 | 10.5460802  | 7.913709953 | 8.949745867 | 3.041618794 | 15.12905707 | 5.578374512  | 12.74499808 |
| ENSMUSG00000039697 | -0.184795535 | 3.558755187  | 0.32700608  | 0.567430599 | 0.999071534 | Ncoa7         | Ncoa7         | NCOA7    | 11.43934547 | 13.39955004 | 13.93528561 | 13.32136446 | 12.0994739  | 13.31547556 | 11.77818341 | 10.43145031 | 11.62816095  | 5.163358196 |
| ENSMUSG00000030282 | -0.146742602 | 5.331364829  | 0.326998658 | 0.567431754 | 0.999071534 | Cmas          | Cmas          | CMAS     | 56.0738468  | 42.86670211 | 36.0836381  | 42.94752395 | 41.20361381 | 51.00627523 | 56.23759003 | 30.05086679 | 16.57798623  | 35.81671255 |
| ENSMUSG00000092417 | 0.153302253  | 4.032168568  | 0.326990434 | 0.567436627 | 0.999071534 | Gpank1        | Gpank1        | GPANK1   | 13.05348624 | 18.0241735  | 17.57057751 | 15.5419187  | 15.5004071  | 17.3901566  | 14.81980221 | 17.20153065 | 11.39245499  | 22.09133    |
| ENSMUSG00000048218 | 0.204810477  | 4.828544214  | 0.326861529 | 0.567513004 | 0.999071534 | Amigo2        | Amigo2        | AMIGO2   | 18.66788892 | 11.56155866 | 17.90717861 | 43.50258081 | 43.68891115 | 29.39591325 | 20.19117157 | 23.0735391  | 34.57020824  | 36.07814841 |
| ENSMUSG00000041949 | -0.242154503 | 2.993023552  | 0.326838734 | 0.567526512 | 0.999071534 | Tango6        | Tango6        | TANGO6   | 14.59744698 | 9.664277238 | 6.799342255 | 6.175007483 | 7.063476652 | 15.86215121 | 8.542418739 | 3.039627905 | 4.32127603   | 4.836563373 |
| ENSMUSG00000020231 | 0.14227249   | 6.300833186  | 0.326659    | 0.567633044 | 0.999071534 | Dip2a         | Dip2a         | DIP2A    | 68.49571274 | 95.93129185 | 74.86008502 | 57.93405897 | 92.87163747 | 88.18773976 | 56.62588179 | 122.4141056 | 57.43368688  | 74.70529643 |
| ENSMUSG00000020697 | 0.122693631  | 5.367854573  | 0.326512221 | 0.567720072 | 0.999071534 | Lig3          | Lig3          | LIG3     | 36.49361744 | 40.73226051 | 42.47905904 | 36.77251647 | 48.33249302 | 48.24131309 | 32.68122321 | 43.86735727 | 41.6413872   | 39.34609663 |
| ENSMUSG00000027312 | 0.137835613  | 5.163550171  | 0.326410492 | 0.567780404 | 0.999071534 | Atrn          | Atrn          | ATRN     | 26.66841275 | 30.77153305 | 38.57448626 | 40.93544286 | 38.84912159 | 41.25614558 | 27.05099267 | 31.57068074 | 40.30572007  | 38.3003532  |
| ENSMUSG00000024008 | 0.391288855  | 0.2308763    | 0.326363733 | 0.567808139 | 0.999071534 | Cpne5         | Cpne5         | CPNE5    | 0.350900168 | 0.830060622 | 1.548365068 | 0.901967385 | 1.046440986 | 0.9459081   | 0.776583522 | 2.003391119 | 1.335667137  | 0.522871716 |
| ENSMUSG00000022800 | 0.152259326  | 6.506029207  | 0.326331983 | 0.567826974 | 0.999071534 | Fytdt1        | Fytdt1        | FYTDT1   | 104.3577099 | 117.8686083 | 57.49146817 | 74.10008979 | 94.37589638 | 92.18965865 | 144.7681115 | 100.5149682 | 59.24076594  | 67.3850924  |
| ENSMUSG00000035437 | 0.141250031  | 5.250959441  | 0.326324742 | 0.56783127  | 0.999071534 | Rabgap1       | Rabgap1       | RABGAP1  | 27.22985301 | 41.08800077 | 44.90258697 | 37.0500449  | 36.69083706 | 36.01726995 | 26.27440915 | 48.21955177 | 37.94866041  | 40.65327592 |
| ENSMUSG00000073016 | -0.362179059 | 2.773978176  | 0.326269061 | 0.567864303 | 0.999071534 | Uppt          | Uppt          | UPRT     | 9.263764428 | 16.36405226 | 3.366011017 | 4.440454819 | 5.951633105 | 13.2427134  | 12.49005164 | 3.246875263 | 0.707117896  | 0.980384468 |
| ENSMUSG00000078249 | -0.144417417 | 8.961541038  | 0.325992652 | 0.568028343 | 0.999071534 | Hmga1-rs1     | Hmga1-rs1     | HMGAI    | 541.860039  | 507.6413602 | 522.5395503 | 479.9854131 | 671.2264897 | 723.1831234 | 472.551073  | 382.7858687 | 319.381583   | 447.512183  |
| ENSMUSG00000031155 | -0.210460131 | 2.933937567  | 0.325943051 | 0.568057788 | 0.999071534 | Pim2          | Pim2          | PIM2     | 8.983044293 | 7.174095373 | 10.9058757  | 7.076974868 | 7.717502268 | 7.203453991 | 5.75966112  | 8.566224097 | 3.064177549  | 9.477049853 |
| ENSMUSG00000079426 | -0.163773303 | 7.943184119  | 0.325796084 | 0.568145055 | 0.999071534 | Arpc4         | Arpc4         | ARPC4    | 339.8117224 | 222.3376665 | 286.3802173 | 275.446963  | 223.9383709 | 325.246862  | 342.2791872 | 149.9780041 | 153.9159953  | 175.4234607 |
| ENSMUSG00000021745 | 0.13007635   | 5.047749707  | 0.325583237 | 0.568271486 | 0.999071534 | Ptprg         | Ptprg         | PTPRG    | 25.33499211 | 33.97319545 | 31.64050356 | 38.29892282 | 33.42070898 | 40.31023748 | 38.76446079 | 30.94893867 | 30.87748145  | 25.35927823 |
| ENSMUSG00000078546 | 0.242867266  | 2.015777702  | 0.325516368 | 0.568311217 | 0.999071534 | 2210404O09Rik | 2210404O09Rik |          | 4.280982046 | 4.268883197 | 2.625488593 | 3.885397967 | 3.531738326 | 4.220205368 | 6.536244641 | 3.730452429 | 2.121353688  | 4.117614764 |
| ENSMUSG00000038990 | 0.181676255  | 3.605315659  | 0.325252322 | 0.568468158 | 0.999071534 | Cables2       | Cables2       | CABLES2  | 11.9306057  | 15.00038123 | 10.09803305 | 7.285121188 | 14.6501738  | 17.75396741 | 8.671849326 | 13.19474841 | 7.306884924  | 16.27438216 |
| ENSMUSG00000020358 | 0.15004898   | 8.857338746  | 0.325214547 | 0.568490617 | 0.999071534 | Hnnpab        | Hnnpab        | HNRNPAB  | 454.2051771 | 410.1092372 | 529.3388925 | 369.87601   | 524.3977389 | 722.3827396 | 559.7225733 | 355.0147229 | 359.6087344  | 409.4085537 |
| ENSMUSG00000001909 | 0.117154939  | 5.627210794  | 0.325210254 | 0.56849317  | 0.999071534 | Trmt1         | Trmt1         | TRMT1    | 52.14376492 | 47.84706584 | 50.42284504 | 44.40454819 | 50.94859548 | 53.3346644  | 39.02332197 | 54.78238475 | 46.1983692   | 52.61396643 |

|                     |              |              |             |             |             |               |               |             |             |             |             |             |             |             |             |             |             |             |
|---------------------|--------------|--------------|-------------|-------------|-------------|---------------|---------------|-------------|-------------|-------------|-------------|-------------|-------------|-------------|-------------|-------------|-------------|-------------|
| ENSMUSG00000038065  | -0.260678091 | 2.387941405  | 0.325174377 | 0.568514502 | 0.999071534 | 2410066E13Rik | Mturn         | MTURN       | 7.088183388 | 6.99622524  | 2.086926831 | 6.244389589 | 6.474853598 | 3.34705943  | 4.077063489 | 2.763298096 | 6.521198373 | 4.836563373 |
| ENSMUSG000000097121 | 0.426383877  | 0.168980111  | 0.324953865 | 0.568645652 | 0.999071534 | D130020L05Rik | D130020L05Rik |             | 0.912340436 | 1.363671021 | 1.279084186 | 0.48564746  | 0.39241537  | 0.654859454 | 0.19414588  | 1.036236786 | 1.807079067 | 1.568615148 |
| ENSMUSG000000041115 | -0.193898113 | 3.447263996  | 0.324862556 | 0.568699977 | 0.999071534 | lqsec2        | lqsec2        | IQSEC2      | 12.00078574 | 16.71979252 | 8.347707322 | 8.742145425 | 14.19235587 | 13.38823772 | 8.024696391 | 10.08603805 | 4.635550651 | 13.66002358 |
| ENSMUSG000000020491 | -0.252276433 | 2.518122195  | 0.324812475 | 0.568729776 | 0.999071534 | 2810021J22Rik | 2810021J22Rik | ZNF717      | 6.035482885 | 3.557402664 | 5.049016526 | 9.089055958 | 7.652099707 | 4.074681045 | 3.818202315 | 6.562832977 | 2.042785033 | 8.300588492 |
| ENSMUSG000000098369 | 0.929042261  | 0.986209327  | 0.324759328 | 0.568761404 | 0.999071534 | RP23-100I17.7 | Gm2274        |             | 6.73728322  | 0           | 0           | 0           | 0           | 7.276216152 | 0           | 4.973936572 | 0           | 0.653589645 |
| ENSMUSG00000028300  | -0.139207401 | 4.801274045  | 0.324677075 | 0.568810359 | 0.999071534 | 3110043O21Rik | 3110043O21Rik | C9orf72     | 30.80903472 | 33.26171491 | 31.50586312 | 20.25957511 | 35.97140888 | 24.22979979 | 31.58106322 | 30.94893867 | 18.69933991 | 21.82989414 |
| ENSMUSG00000018900  | 0.183198476  | 3.604984958  | 0.324374555 | 0.568990482 | 0.999071534 | Slc22a5       | Slc22a5       | SLC22A5     | 12.21132584 | 13.04380977 | 7.135943356 | 12.6969255  | 13.40752513 | 11.49642152 | 8.283557565 | 12.22759407 | 12.72812213 | 16.07830527 |
| ENSMUSG00000022553  | -0.120323013 | 6.538466888  | 0.324360009 | 0.568999145 | 0.999071534 | Maf1          | Maf1          | MAF1        | 116.6392157 | 89.0536467  | 97.81628016 | 94.63719333 | 104.3824883 | 104.4864639 | 90.98970263 | 91.94874414 | 54.60521529 | 93.33260131 |
| ENSMUSG000000086753 | -0.546232542 | -0.021072492 | 0.324349543 | 0.569005379 | 0.999071534 | Gm15751       | Gm15751       |             | 1.403600671 | 0.711480533 | 0.269280881 | 2.358991623 | 0.39241537  | 0.800383777 | 0.064715293 | 0.552659619 | 0           | 2.0261279   |
| ENSMUSG000000073125 | 0.592843186  | -0.338174524 | 0.324338808 | 0.569011773 | 0.999071534 | Xlr3b         | Xlr3b         |             | 1.543960738 | 0.770770577 | 0.06732022  | 0           | 0.457817931 | 0.873145938 | 0.647152935 | 0.138164905 | 1.885647722 | 0.130717929 |
| ENSMUSG000000037818 | 0.257585078  | 3.154819695  | 0.323877628 | 0.569286598 | 0.999071534 | 3110057O12Rik | Abhd18        | ABHD18      | 6.105662918 | 12.92522968 | 6.73022034  | 5.966861163 | 9.941189363 | 3.128772945 | 5.436084652 | 16.44162367 | 7.306884924 | 12.35284429 |
| ENSMUSG000000025410 | -0.134699523 | 7.626189624  | 0.323828514 | 0.569315881 | 0.999071534 | Dctn2         | Dctn2         | DCTN2       | 213.8385622 | 203.4241424 | 214.7515029 | 206.9668238 | 234.1411705 | 194.7843064 | 206.6359321 | 186.3844566 | 138.9093822 | 184.181562  |
| ENSMUSG000000097867 | -0.253567209 | 2.396497834  | 0.323751528 | 0.569361788 | 0.999071534 | 1110054M08Rik | Lppos         |             | 4.772242281 | 4.209593153 | 5.452937848 | 8.187088573 | 6.14784079  | 3.201535107 | 1.941458804 | 6.079255811 | 5.185531236 | 5.490153018 |
| ENSMUSG000000051314 | 0.448969184  | 0.300934368  | 0.323669604 | 0.569410648 | 0.999071534 | Ffar2         | Ffar2         | FFAR2       | 0.912340436 | 1.007930755 | 0.06732022  | 2.289609516 | 0.457817931 | 2.619437815 | 0.582437641 | 0.414494714 | 1.178529826 | 1.568615148 |
| ENSMUSG000000057982 | -0.328472151 | 1.638813352  | 0.323635105 | 0.569431226 | 0.999071534 | Zfp809        | Zfp809        |             | 5.052962415 | 3.853852886 | 3.096730136 | 1.734552664 | 3.597140888 | 4.147443207 | 2.070889391 | 2.694215643 | 0.15713731  | 4.313691657 |
| ENSMUSG000000039903 | -0.239380298 | 2.260845814  | 0.323634879 | 0.569431361 | 0.999071534 | Eva1c         | Eva1c         | EVA1C       | 3.509001677 | 5.336103997 | 6.73022034  | 5.897479057 | 4.578179312 | 2.546675653 | 3.818202315 | 5.388431287 | 3.221314859 | 5.294076125 |
| ENSMUSG000000002105 | 0.127317386  | 6.498891058  | 0.323328941 | 0.569613908 | 0.999071534 | Slc39a13      | Slc39a13      | SLC39A13    | 83.09315971 | 86.97849515 | 95.05615112 | 80.20571517 | 103.4014499 | 86.00487492 | 74.87559456 | 107.4922959 | 71.81175076 | 112.6788548 |
| ENSMUSG000000023349 | -0.194016069 | 6.242173855  | 0.323020096 | 0.569798306 | 0.999071534 | Clec4n        | Clec4n        | CLEC4A      | 119.9376773 | 93.91543034 | 73.98492216 | 72.22677292 | 59.51633105 | 92.91728026 | 135.1902481 | 63.83218601 | 21.92065477 | 29.28073767 |
| ENSMUSG000000062397 | 0.143117626  | 7.773862577  | 0.322757881 | 0.569954954 | 0.999071534 | Zfp706        | Zfp706        | ZNF706      | 231.5941107 | 182.6726268 | 215.7613062 | 235.9685444 | 210.9886637 | 253.9399437 | 265.5915644 | 165.4524735 | 206.6355629 | 215.2924291 |
| ENSMUSG000000037278 | 0.193283817  | 5.130725707  | 0.32267145  | 0.570006607 | 0.999071534 | Tmem97        | Tmem97        | TMEM97      | 39.09027868 | 22.11518656 | 40.12285132 | 37.25819122 | 30.01977577 | 68.10538318 | 60.44408411 | 13.67832557 | 17.83508471 | 29.01938024 |
| ENSMUSG000000011257 | 0.144708403  | 7.002918836  | 0.322628616 | 0.570032209 | 0.999071534 | Pabpc4        | Pabpc4        | PABPC4      | 113.8320144 | 123.2047123 | 147.7005634 | 135.2257257 | 109.8763035 | 165.5339175 | 89.307105   | 99.75506126 | 144.0949134 | 146.7308753 |
| ENSMUSG000000040717 | -0.199479593 | 2.856164331  | 0.322555738 | 0.570075773 | 0.999071534 | Il17rd        | Il17rd        | IL17RD      | 8.421604025 | 7.470545595 | 8.145746661 | 7.493267507 | 7.913709953 | 7.348978314 | 6.212668174 | 8.704389002 | 5.342668547 | 4.313691657 |
| ENSMUSG000000024603 | 0.12933019   | 5.798271039  | 0.322495064 | 0.570112047 | 0.999071534 | Dctn4         | Dctn4         | DCTN4       | 51.16124445 | 82.23529159 | 48.87447997 | 37.39695543 | 57.03103371 | 76.32750744 | 64.45643231 | 54.7133023  | 41.71995586 | 46.92773651 |
| ENSMUSG000000024908 | -0.140567488 | 5.692199065  | 0.322398379 | 0.57016986  | 0.999071534 | Ppp6r3        | Ppp6r3        | PPP6R3      | 60.21446878 | 77.55137808 | 46.6529127  | 41.55988182 | 56.11539785 | 82.439529   | 53.13125595 | 44.76542915 | 22.94204729 | 43.46371114 |
| ENSMUSG000000029924 | -0.149525716 | 4.847011197  | 0.322361785 | 0.570191744 | 0.999071534 | Slc37a3       | Slc37a3       | SLC37A3     | 35.72163707 | 39.84290984 | 26.25488593 | 29.48739528 | 25.24538878 | 36.67212941 | 36.62885611 | 28.80738265 | 13.1209654  | 19.47697142 |
| ENSMUSG000000048497 | 0.140722642  | 4.587052567  | 0.322260313 | 0.570252435 | 0.999071534 | Mmgt2         | Mmgt2         | MMGT1       | 25.54553221 | 20.87009563 | 21.00390875 | 21.78598146 | 29.10413991 | 22.41074575 | 29.83375029 | 25.00784777 | 15.71373102 | 28.3657906  |
| ENSMUSG000000026941 | 0.318421877  | 1.111635536  | 0.322246963 | 0.570260421 | 0.999071534 | Mamdc4        | Mamdc4        | MAMDC4      | 1.122880537 | 1.067220799 | 1.88496617  | 3.607869541 | 1.569661478 | 2.110102684 | 1.035444696 | 2.072473572 | 2.592765618 | 2.875794438 |
| ENSMUSG000000053317 | 0.163130375  | 7.736696292  | 0.322239337 | 0.570264983 | 0.999071534 | Sec61b        | Sec61b        | SEC61B      | 251.03398   | 131.9203488 | 224.5129348 | 253.7997458 | 178.0911752 | 189.8364794 | 293.4838559 | 164.6234841 | 203.5713854 | 223.2008638 |
| ENSMUSG000000026750 | -0.16045438  | 7.958009868  | 0.322230613 | 0.570270202 | 0.999071534 | Psmb7         | Psmb7         | PSMB7       | 341.6364033 | 198.918099  | 281.7351221 | 300.3551393 | 236.1032474 | 293.3042731 | 334.6427826 | 153.155797  | 155.0159565 | 217.318557  |
| ENSMUSG000000019173 | -0.15153928  | 7.531533825  | 0.322226915 | 0.570272414 | 0.999071534 | Rab5c         | Rab5c         | RAB5C       | 192.1529318 | 227.7330606 | 188.496617  | 156.0403576 | 250.0993955 | 219.8872521 | 221.4557343 | 192.4637124 | 84.46130423 | 147.7112598 |
| ENSMUSG000000007035 | 0.290272384  | 1.93923535   | 0.322008677 | 0.570402997 | 0.999071534 | Msh5          | Msh5          | MSH5-SAPCD1 | 4.421342113 | 2.727342043 | 2.625488593 | 3.81601586  | 3.727946011 | 1.309718907 | 2.006174098 | 4.352194501 | 5.264099892 | 5.751588876 |
| ENSMUSG000000034243 | 0.162516356  | 5.66157923   | 0.321991252 | 0.570413426 | 0.999071534 | Golgb1        | Golgb1        | GOLGB1      | 31.93191526 | 53.83536032 | 57.08754685 | 53.63236836 | 49.96755706 | 45.11254014 | 25.36839504 | 69.63511201 | 57.27654957 | 53.46363296 |
| ENSMUSG000000020485 | 0.151013234  | 7.107741923  | 0.321830806 | 0.570509469 | 0.999071534 | Supt4a        | Supt4a        | SUPT4H1     | 176.2220642 | 120.4773702 | 115.1175768 | 136.2664573 | 130.1510976 | 93.93595053 | 163.3414007 | 160.6857843 | 133.9595569 | 131.8943904 |
| ENSMUSG000000029016 | 0.181090526  | 3.427233969  | 0.321476723 | 0.570721537 | 0.999071534 | Clcn6         | Clcn6         | CLCN6       | 8.140883891 | 10.96865822 | 11.915679   | 11.37866547 | 9.90956062  | 11.20537287 | 7.44225875  | 12.36575898 | 10.21392516 | 12.81035704 |
| ENSMUSG000000028337 | -0.146923307 | 4.601242246  | 0.321424367 | 0.570752907 | 0.999071534 | Coro2a        | Coro2a        | CORO2A      | 26.31751258 | 34.21035562 | 24.57188042 | 21.1615425  | 25.76860927 | 33.68888078 | 13.39606575 | 23.83344608 | 19.32788915 | 21.76453518 |
| ENSMUSG000000018008 | -0.197414916 | 5.408003157  | 0.321253752 | 0.570855158 | 0.999071534 | Cyth4         | Cyth4         | CYTH4       | 75.93479629 | 50.39653775 | 30.56338004 | 32.8177364  | 46.76283154 | 85.13172898 | 52.41938772 | 23.14262155 | 12.2567102  | 30.98014918 |
| ENSMUSG000000019302 | -0.153030613 | 4.690089153  | 0.321194012 | 0.570890969 | 0.999071534 | Atp6v0a1      | Atp6v0a1      | ATP6VOA1    | 26.24733254 | 38.30136869 | 26.72612748 | 23.38176991 | 26.03021952 | 40.38299964 | 23.42693624 | 28.32380548 | 10.8424744  | 19.08481764 |
| ENSMUSG000000048012 | -0.426725418 | 0.07549402   | 0.321165241 | 0.570908218 | 0.999071534 | Zfp473        | Zfp473        | ZNF473      | 0.350900168 | 0.474320355 | 2.288887492 | 1.040731598 | 1.308051232 | 0.218286485 | 0.647152935 | 1.036236786 | 0.707117896 | 1.045743432 |
| ENSMUSG000000052609 | -0.136435487 | 5.42258071   | 0.320916099 | 0.571057623 | 0.999071534 | Plekkg3       | Plekkg3       | PLEKHG3     | 43.932701   | 45.23830388 | 51.90388988 | 38.50706913 | 53.43389282 | 49.33274551 | 27.95700678 | 53.2625708  | 22.15636074 | 47.12381341 |

|                      |              |              |             |             |             |               |               |           |             |             |             |             |             |             |             |             |             |             |
|----------------------|--------------|--------------|-------------|-------------|-------------|---------------|---------------|-----------|-------------|-------------|-------------|-------------|-------------|-------------|-------------|-------------|-------------|-------------|
| ENSMUSG00000009741   | 0.133114994  | 6.173202971  | 0.320784079 | 0.571136823 | 0.999071534 | Ubp1          | Ubp1          | UBP1      | 74.46101559 | 55.02116121 | 87.71824711 | 67.99446442 | 71.28879214 | 75.89093447 | 53.84312417 | 90.70525999 | 73.1474179  | 65.48968243 |
| ENSMUSG000000054263  | -0.281875735 | 2.284364456  | 0.320727974 | 0.571170488 | 0.999071534 | Lifr          | Lifr          | LIFR      | 6.87763287  | 3.260952442 | 3.500651458 | 7.701413827 | 5.493815174 | 10.69603774 | 3.947632902 | 3.730452429 | 0.942823861 | 3.006512367 |
| ENSMUSG000000039233  | 0.171926893  | 5.051753973  | 0.32065791  | 0.571212533 | 0.999071534 | Tbce          | Tbce          | TBCE      | 36.70415754 | 23.18240736 | 35.20847524 | 40.44976812 | 24.85297341 | 26.41266463 | 18.96158099 | 33.02141224 | 30.24893221 | 57.71196566 |
| ENSMUSG000000044702  | 0.237351803  | 2.497376806  | 0.320602944 | 0.571245523 | 0.999071534 | Palb2         | Palb2         | PALB2     | 6.035482885 | 2.608761954 | 4.577774983 | 8.256470679 | 4.578179312 | 8.513172898 | 6.212668174 | 3.937699786 | 5.971217787 | 4.379050622 |
| ENSMUSG00000018678   | -0.179650201 | 3.688188577  | 0.320297556 | 0.57142888  | 0.999071534 | Sp2           | Sp2           | SP2       | 10.17610486 | 17.25340292 | 14.81044848 | 8.395234892 | 20.14398897 | 16.0804377  | 8.865995207 | 14.64547991 | 8.956826681 | 9.86920364  |
| ENSMUSG00000074863   | 0.28374071   | 1.375679265  | 0.320263695 | 0.571449217 | 0.999071534 | Gm5665        | Platr25       |           | 3.438821644 | 1.956571465 | 1.95228639  | 2.844666369 | 1.308051232 | 1.8918162   | 3.235764674 | 1.865226215 | 2.357059653 | 3.529384083 |
| ENSMUSG00000028811   | -0.127227433 | 5.742049348  | 0.320104055 | 0.571545119 | 0.999071534 | Yars          | Yars          | YARS      | 69.61859327 | 63.79608778 | 55.06794024 | 53.90989679 | 47.22064947 | 87.02354518 | 49.31305363 | 38.27167863 | 31.89887397 | 48.62706959 |
| ENSMUSG00000028999   | 0.159198554  | 3.824863211  | 0.320070006 | 0.571565577 | 0.999071534 | Rint1         | Rint1         | RINT1     | 12.49204597 | 15.71186177 | 11.5790779  | 14.22333184 | 14.78097892 | 15.78938905 | 12.9430587  | 11.12227484 | 15.24231909 | 15.75151045 |
| ENSMUSG00000029478   | -0.139549914 | 6.485888218  | 0.320052505 | 0.571576093 | 0.999071534 | Ncor2         | Ncor2         | NCOR2     | 85.12838069 | 106.5442098 | 93.9790276  | 90.47426694 | 111.3805624 | 124.2050097 | 43.10038546 | 85.66224097 | 66.94049414 | 97.51557504 |
| ENSMUSG000000042812  | 0.141604796  | 5.791135587  | 0.320039084 | 0.571584158 | 0.999071534 | Foxf1         | Foxf1         | FOXF1     | 41.33603976 | 46.0683645  | 52.71173253 | 43.22505238 | 90.64795037 | 54.86266979 | 53.06654065 | 74.40180123 | 45.17697668 | 50.71855646 |
| ENSMUSG000000042436  | 0.467071759  | 1.569420281  | 0.320029208 | 0.571590092 | 0.999071534 | Mfap4         | Mfap4         | MFAP4     | 4.912602348 | 1.304380977 | 1.95228639  | 1.665170557 | 2.550699902 | 8.58593506  | 7.701119924 | 0.690824524 | 0           | 0.522871716 |
| ENSMUSG000000021835  | 0.24111406   | 3.221045131  | 0.31999464  | 0.571610866 | 0.999071534 | Bmp4          | Bmp4          | BMP4      | 5.684582717 | 9.604987194 | 10.09803305 | 7.84017804  | 10.52981242 | 4.438491853 | 6.536244641 | 18.99767441 | 9.663944577 | 6.601255415 |
| ENSMUSG00000019362   | 0.134316958  | 6.836896776  | 0.319981755 | 0.571618609 | 0.999071534 | D8Ertd738e    | D8Ertd738e    | CI9orf53  | 110.4633728 | 94.33046065 | 117.6757452 | 112.7459231 | 129.8240848 | 90.5888911  | 113.3811942 | 124.2102494 | 111.4889216 | 126.2081605 |
| ENSMUSG00000028040   | -0.187989739 | 3.998519767  | 0.319863212 | 0.571689861 | 0.999071534 | Efn4          | Efn4          | EFNA4     | 13.19384631 | 9.249246928 | 26.72612748 | 21.43907092 | 16.41604296 | 13.31547556 | 12.23119047 | 19.27400422 | 13.74951464 | 11.89533154 |
| ENSMUSG000000036764  | -0.369105769 | 0.925947816  | 0.319830192 | 0.571709711 | 0.999071534 | Dnajc12       | Dnajc12       | DNAI12    | 3.719541778 | 1.245090933 | 1.615685288 | 1.040731598 | 2.812310149 | 3.856394561 | 1.941458804 | 0.621742072 | 1.178529826 | 0.261435858 |
| ENSMUSG000000022601  | 0.1796073    | 3.636056241  | 0.319756151 | 0.571754226 | 0.999071534 | Rpl24         | Zbtb11        | ZBTB11    | 11.22880537 | 17.43127306 | 7.674505119 | 12.14186865 | 11.38004572 | 16.51701067 | 13.33135046 | 11.95126426 | 13.04239675 | 8.169870563 |
| ENSMUSG000000024104  | -0.154342919 | 5.822246733  | 0.319725988 | 0.571772363 | 0.999071534 | Fam21         | Fam21         | FAM21C    | 39.93243909 | 75.47622653 | 72.57119753 | 49.05314933 | 72.26983056 | 59.66497245 | 29.31602795 | 73.98730651 | 32.99883514 | 64.05178521 |
| ENSMUSG000000042616  | 0.211086696  | 2.867651466  | 0.319705854 | 0.57178447  | 0.999071534 | Oscp1         | Oscp1         | OSCP1     | 6.456563086 | 4.743203553 | 6.664701814 | 7.978942253 | 8.567735569 | 7.421740475 | 8.801279913 | 4.421276953 | 8.485414751 | 7.450921954 |
| ENSMUSG000000043770  | -0.155259397 | 7.966750109  | 0.319634996 | 0.571827081 | 0.999071534 | Gm12481       | Gm12481       |           | 301.8443243 | 209.0566966 | 265.6455895 | 337.1970378 | 247.8757084 | 190.7823875 | 243.3295035 | 272.1848624 | 162.2442728 | 267.9717545 |
| ENSMUSG000000012819  | 0.163720375  | 4.817054773  | 0.319521313 | 0.571895461 | 0.999071534 | Cdh23         | Cdh23         | CDH23     | 30.17741442 | 28.28135118 | 25.71632417 | 21.2309246  | 32.57047567 | 31.43325378 | 14.04321869 | 47.94322196 | 22.15636074 | 27.18932923 |
| ENSMUSG00000019951   | 0.12918337   | 6.4016865    | 0.319487302 | 0.571915921 | 0.999071534 | Uhrf1bp1l     | Uhrf1bp1l     | UHRF1BP1L | 68.98697297 | 104.8840886 | 77.41825339 | 73.47565084 | 94.57210407 | 90.5888911  | 69.18064873 | 112.8116448 | 65.91910163 | 86.86206383 |
| ENSMUSG000000032783  | 0.171542356  | 3.828545706  | 0.319462936 | 0.57193058  | 0.999071534 | Troap         | Troap         | TROAP     | 14.80798708 | 8.004155995 | 16.35881354 | 11.51742969 | 18.24731469 | 22.48350791 | 12.42533635 | 10.98410993 | 11.78529826 | 15.68615148 |
| ENSMUSG000000097617  | -0.39280058  | 0.691238103  | 0.319420511 | 0.571956105 | 0.999071534 | Gm10687       | Gm10687       |           | 2.38612114  | 1.007930755 | 2.490848153 | 2.150845303 | 0.654025616 | 1.528005392 | 1.100159989 | 0.069082452 | 1.492804447 | 1.960768935 |
| ENSMUSG000000035181  | 0.129933848  | 5.684403703  | 0.319162579 | 0.572111339 | 0.999071534 | Heatr5a       | Heatr5a       | HEATR5A   | 37.26559781 | 54.2503963  | 59.37643434 | 45.79219032 | 57.61965677 | 69.26957777 | 37.6643008  | 52.57174627 | 55.07662722 | 43.39835243 |
| ENSMUSG000000093726  | -0.349192354 | 0.731841724  | 0.319156863 | 0.572111478 | 0.999071534 | Gm20667       | Gm20667       |           | 1.543960738 | 0.889350666 | 1.615685288 | 3.81601586  | 0.850233301 | 2.328389169 | 1.359021163 | 0.759906976 | 0.707117896 | 1.568615148 |
| ENSMUSG000000034263  | 0.16028372   | 3.91979101   | 0.31909228  | 0.572153663 | 0.999071534 | Vwa9          | Vwa9          | VWA9      | 16.07122768 | 17.01624274 | 10.9058757  | 14.36209606 | 15.30419941 | 23.79322682 | 19.47930334 | 13.74740803 | 8.956826681 | 12.74499808 |
| ENSMUSG000000074802  | 0.157816272  | 4.146633001  | 0.318990528 | 0.572214933 | 0.999071534 | Gas2l3        | Gas2l3        | GAS2L3    | 13.68510654 | 17.07553279 | 19.05162236 | 13.39074656 | 23.34871449 | 22.92008088 | 19.54401863 | 21.07014798 | 15.3994564  | 10.98030604 |
| ENSMUSG000000000791  | -0.31901227  | 1.158638662  | 0.318913286 | 0.572261454 | 0.999071534 | Il12rb1       | Il12rb1       | IL12RB1   | 1.965040939 | 3.320242487 | 3.567971678 | 2.01208109  | 1.177246109 | 2.837724299 | 1.164875283 | 0.898071881 | 0.864255206 | 3.529384083 |
| ENSMUSG000000033184  | 0.140962168  | 7.236026054  | 0.318884335 | 0.572278891 | 0.999071534 | Tmed7         | Tmed7         | TMED7     | 128.1487412 | 157.7708082 | 154.6345461 | 137.5847173 | 166.0571039 | 168.1533553 | 209.4186897 | 136.2996786 | 137.4951464 | 109.7377014 |
| ENSMUSG0000000003541 | -0.225940909 | 6.993400052  | 0.31887418  | 0.572285008 | 0.999071534 | Ier3          | Ier3          | IER3      | 144.5708691 | 247.5952254 | 114.3770544 | 73.40626873 | 138.3918203 | 46.7133077  | 83.87102035 | 245.5190358 | 68.5904359  | 108.7573169 |
| ENSMUSG000000022372  | -0.219678271 | 4.476244944  | 0.318743796 | 0.572363557 | 0.999071534 | Sla           | Sla           | SLA       | 42.88000049 | 22.35234674 | 17.83985839 | 26.29581838 | 14.19235587 | 44.8214915  | 20.70889391 | 6.35558562  | 10.05678785 | 23.07171447 |
| ENSMUSG000000026479  | -0.1553191   | 4.456010144  | 0.318739749 | 0.572365996 | 0.999071534 | Lamc2         | Lamc2         | LAMC2     | 22.10671057 | 21.81873634 | 21.94639183 | 30.80565531 | 22.04066326 | 37.98184831 | 22.58563742 | 14.78364481 | 12.33527885 | 16.14366423 |
| ENSMUSG000000055497  | 0.483759411  | -0.125925858 | 0.31863612  | 0.572428442 | 0.999071534 | Gm9974        | Gm9974        |           | 0.070180034 | 0.474320355 | 0.740522424 | 1.665170557 | 0.39241537  | 0.436572969 | 0.19414588  | 1.312566595 | 1.099961171 | 1.241820326 |
| ENSMUSG000000046679  | 0.173571666  | 3.431535391  | 0.318624585 | 0.572435394 | 0.999071534 | C87436        | C87436        | C2orf42   | 9.544484562 | 8.419186306 | 10.77123525 | 11.37866547 | 11.77246109 | 13.09718907 | 9.319002261 | 9.118883716 | 11.62816095 | 11.045665   |
| ENSMUSG000000024442  | -0.171510902 | 3.883546827  | 0.318382789 | 0.572581154 | 0.999071534 | O610009O20Rik | O610009O20Rik | KIAA0141  | 19.15914916 | 15.29683146 | 12.05031944 | 16.79046978 | 17.2008737  | 23.35665385 | 14.43151045 | 9.049801264 | 6.78335683  | 15.68615148 |
| ENSMUSG000000028114  | -0.207767804 | 3.805232584  | 0.31830914  | 0.572625566 | 0.999071534 | Mettl14       | Mettl14       | METTL14   | 15.93086761 | 19.86216488 | 13.59868451 | 12.28063286 | 15.63121222 | 28.45000516 | 16.89069616 | 7.460904859 | 4.32127603  | 9.28097296  |
| ENSMUSG000000037366  | -0.222484075 | 3.025310462  | 0.318185536 | 0.572700117 | 0.999071534 | Pafah2        | Pafah2        | PAFAH2    | 11.7200656  | 9.486407105 | 4.914376085 | 6.313771696 | 12.68809695 | 12.2968053  | 6.924536402 | 7.806317121 | 2.514196963 | 7.712357812 |
| ENSMUSG000000006411  | -0.366400591 | 1.128086099  | 0.317830356 | 0.572914448 | 0.999071534 | Pvri4         | Nectin4       | NECTIN4   | 3.158101509 | 3.083082309 | 2.086926831 | 0.624438959 | 3.139322957 | 3.710870238 | 1.29430587  | 1.588896405 | 0.078568655 | 2.548999616 |
| ENSMUSG000000022749  | 0.145977225  | 4.762465735  | 0.317726232 | 0.572977311 | 0.999071534 | Tbc1d23       | Tbc1d23       | TBC1D23   | 24.77355184 | 39.90219989 | 18.37842015 | 23.45115201 | 26.88045282 | 26.77647544 | 25.30367975 | 34.6793911  | 24.51342039 | 24.44425272 |

|                    |              |              |             |             |             |               |               |          |             |             |             |             |             |             |             |             |             |             |
|--------------------|--------------|--------------|-------------|-------------|-------------|---------------|---------------|----------|-------------|-------------|-------------|-------------|-------------|-------------|-------------|-------------|-------------|-------------|
| ENSMUSG00000053044 | -0.480670698 | -0.024556145 | 0.31768414  | 0.573002727 | 0.999071534 | Cd8b1         | Cd8b1         | CD8B     | 1.052700503 | 0.474320355 | 1.009803305 | 1.387642131 | 1.177246109 | 2.255627007 | 0.064715293 | 0.828989429 | 0.471411931 | 0.065358965 |
| ENSMUSG00000033813 | 0.170852974  | 7.270299893  | 0.317399542 | 0.573174632 | 0.999071534 | Tcea1         | Tcea1         | TCEA1    | 192.3634719 | 147.2171803 | 124.7443683 | 139.31927   | 151.276125  | 192.819728  | 296.137183  | 103.6236786 | 111.9603335 | 95.750883   |
| ENSMUSG00000045917 | -0.190308218 | 3.298864044  | 0.317392434 | 0.573178927 | 0.999071534 | 6330416G13Rik | 6330416G13Rik | C9orf91  | 14.52726694 | 10.85007813 | 8.347707322 | 9.921641237 | 10.20279961 | 15.71662689 | 10.9368846  | 6.493750525 | 4.871256616 | 7.516280918 |
| ENSMUSG00000063663 | -0.183182561 | 3.756038877  | 0.317374215 | 0.573189935 | 0.999071534 | Brwd3         | Brwd3         | BRWD3    | 10.17610486 | 18.67636399 | 15.61829112 | 12.35001497 | 17.13547114 | 15.4983404  | 7.895265804 | 19.55033403 | 7.071178959 | 11.30710086 |
| ENSMUSG00000029344 | 0.121632401  | 6.358787078  | 0.317369794 | 0.573192606 | 0.999071534 | Tpst2         | Tpst2         | TPST2    | 87.86540199 | 72.57101435 | 91.62281989 | 69.24334234 | 86.98540692 | 96.04605321 | 109.6277072 | 69.56602956 | 56.64800033 | 85.03201282 |
| ENSMUSG00000026577 | 0.167076997  | 3.901196173  | 0.317071665 | 0.573372805 | 0.999071534 | Blzf1         | Blzf1         | BLZF1    | 10.31646493 | 12.33232924 | 17.97449883 | 13.18260024 | 18.63973005 | 14.04309717 | 17.34369865 | 19.75758138 | 11.94243557 | 12.09140843 |
| ENSMUSG00000059326 | -0.195274273 | 4.074391169  | 0.316867022 | 0.573496561 | 0.999071534 | Csf2ra        | Csf2ra        | CSF2RA   | 25.47535218 | 20.39577528 | 14.81044848 | 12.21125075 | 20.40559922 | 27.64962138 | 11.77818341 | 19.89574629 | 4.32127603  | 15.42471562 |
| ENSMUSG00000002102 | -0.147847671 | 7.734633522  | 0.316718858 | 0.573586196 | 0.999071534 | Psmc3         | Psmc3         | PSMC3    | 295.1772211 | 204.6692333 | 220.3390812 | 217.9291967 | 224.9194093 | 258.0873869 | 278.275762  | 140.7209555 | 138.9879509 | 175.6195376 |
| ENSMUSG00000029223 | 0.396256993  | 0.935079063  | 0.316675764 | 0.573612271 | 0.999071534 | Uchl1         | Uchl1         | UCHL1    | 3.789721811 | 0.652190488 | 1.750325729 | 0.971349492 | 0.850233301 | 1.45524323  | 5.694945826 | 0.898071881 | 0.392843275 | 1.503256184 |
| ENSMUSG00000062944 | -0.274669672 | 1.506847808  | 0.316543154 | 0.573692527 | 0.999071534 | 9130023H24Rik | 9130023H24Rik |          | 3.649361744 | 4.091013064 | 2.221567271 | 3.607869541 | 1.765869163 | 2.328389169 | 1.48845175  | 1.934308667 | 2.907040239 | 2.941153403 |
| ENSMUSG00000073436 | 0.201985624  | 2.881648025  | 0.316458126 | 0.573743997 | 0.999071534 | Eme2          | Eme2          | EME2     | 9.755024662 | 6.640484974 | 4.510454763 | 7.63203172  | 6.409451036 | 8.222124252 | 6.018522294 | 8.911636359 | 5.892649132 | 8.365947457 |
| ENSMUSG00000010453 | 0.128432469  | 5.449662194  | 0.31630702  | 0.573835489 | 0.999071534 | Kansl3        | Kansl3        | KANSL3   | 48.49440318 | 44.64540344 | 45.57578917 | 27.68346051 | 51.07940061 | 57.40934544 | 35.85227259 | 55.54229172 | 29.93465759 | 43.85586518 |
| ENSMUSG00000027650 | -0.228184073 | 3.017330038  | 0.316173552 | 0.573916325 | 0.999071534 | Tti1          | Tti1          | TTI1     | 11.79024564 | 10.61291795 | 5.520258068 | 7.562649614 | 9.287163747 | 14.26138366 | 3.947632902 | 9.257048621 | 5.578374512 | 3.529384083 |
| ENSMUSG00000052139 | -0.141577943 | 4.954414484  | 0.316140424 | 0.573936394 | 0.999071534 | Bre           | Bre           | BRE      | 24.21211157 | 33.14313482 | 32.85226753 | 34.82981749 | 42.96948297 | 32.08811323 | 24.33295035 | 37.16635939 | 15.3994564  | 34.57489222 |
| ENSMUSG00000030498 | 0.318412761  | 1.137746305  | 0.315965426 | 0.574042425 | 0.999071534 | Gas2          | Gas2          | GAS2     | 2.526481208 | 1.185800888 | 1.009803305 | 2.636520049 | 2.158284533 | 2.910486461 | 4.65901131  | 1.036236786 | 1.178529826 | 1.568615148 |
| ENSMUSG00000036587 | 0.556019206  | -0.282430654 | 0.315954688 | 0.574048932 | 0.999071534 | Fut7          | Fut7          | FUT7     | 1.473780704 | 1.007930755 | 0           | 0           | 0.457817931 | 1.528005392 | 0.388291761 | 0.345412262 | 0.707117896 | 1.111102397 |
| ENSMUSG00000020328 | 0.163503481  | 6.532448624  | 0.315863161 | 0.574104404 | 0.999071534 | Nudcd2        | Nudcd2        | NUDCD2   | 112.3582337 | 59.05288423 | 95.79667355 | 108.7911431 | 74.82053047 | 107.1786639 | 162.305956  | 52.84807608 | 77.62583124 | 74.44386057 |
| ENSMUSG00000020773 | 0.122394001  | 5.423758071  | 0.315862586 | 0.574104753 | 0.999071534 | Trim47        | Trim47        | TRIM47   | 45.68720184 | 35.63331669 | 42.07513771 | 39.96409337 | 49.70594681 | 67.30499941 | 48.34232423 | 34.26489639 | 28.75612777 | 42.48332693 |
| ENSMUSG00000018509 | 0.153253216  | 4.475245238  | 0.315828969 | 0.574125131 | 0.999071534 | Cenpv         | Cenpv         | CENPV    | 22.73833087 | 12.33232924 | 21.54247051 | 25.94890785 | 25.83401183 | 21.7558863  | 30.48090323 | 22.65904439 | 16.34228026 | 21.24166346 |
| ENSMUSG00000020434 | -0.44259406  | 0.20030163   | 0.315602457 | 0.57426247  | 0.999071534 | 4921536K21Rik | 4921536K21Rik | C5orf52  | 2.315941107 | 1.897281421 | 1.009803305 | 0           | 0.915635862 | 0.727621615 | 1.164875283 | 0.828989429 | 0.549980586 | 0.849666539 |
| ENSMUSG00000037096 | -0.629458172 | 2.148156863  | 0.315337408 | 0.574423258 | 0.999071534 | Gm9762        | Gm9762        |          | 9.263764428 | 11.91729893 | 0           | 2.428373729 | 3.727946011 | 8.003837767 | 8.089411685 | 0           | 1.414235792 | 0           |
| ENSMUSG00000087143 | 0.353853937  | 1.241379303  | 0.31526273  | 0.574468577 | 0.999071534 | A830082K12Rik | A830082K12Rik |          | 1.122880537 | 0.474320355 | 1.88496617  | 3.384847434 | 3.073920395 | 1.309718907 | 1.553167044 | 1.243484143 | 2.907040239 | 4.705845444 |
| ENSMUSG00000026857 | 0.131898762  | 4.971225546  | 0.315162104 | 0.574529653 | 0.999071534 | Ntmt1         | Ntmt1         | NTMT1    | 34.3180364  | 24.01246798 | 34.60259326 | 27.68346051 | 34.4017474  | 36.38108076 | 45.36542073 | 26.38949681 | 20.66355629 | 30.84943125 |
| ENSMUSG00000037339 | -0.147296564 | 4.350291251  | 0.315051202 | 0.574596981 | 0.999071534 | Fam53a        | Fam53a        | FAM53A   | 26.03679244 | 18.49849386 | 23.76403778 | 19.01069719 | 23.54492217 | 33.4705943  | 20.51474803 | 15.68171669 | 10.99961171 | 15.75151045 |
| ENSMUSG00000068141 | -0.77329175  | 3.649074952  | 0.314945874 | 0.574660939 | 0.999071534 | Gm10232       | Gm10232       |          | 33.19515587 | 13.04380977 | 8.347707322 | 0           | 28.45011429 | 23.13836736 | 25.8214021  | 0           | 0           | 0           |
| ENSMUSG00000097993 | 0.353652148  | 1.574894893  | 0.314896598 | 0.574690866 | 0.999071534 | Ptprv         | Ptprv         |          | 3.719541778 | 1.126510844 | 3.567971678 | 2.01208109  | 2.550699902 | 5.311637791 | 3.753487022 | 2.348803381 | 0.078568655 | 4.836563373 |
| ENSMUSG00000041782 | -0.667100825 | -0.436868348 | 0.314757687 | 0.574775795 | 0.999071534 | Lad1          | Lad1          | LAD1     | 2.526481208 | 0.5336104   | 0.740522424 | 0           | 0.065402562 | 2.037340523 | 0.258861174 | 0.207247357 | 0           | 0.065358965 |
| ENSMUSG00000097911 | 0.237380575  | 2.377616069  | 0.314693112 | 0.574814482 | 0.999071534 | Gm26691       | Gm26691       |          | 3.509001677 | 4.209593153 | 5.722218729 | 6.938210655 | 3.531738326 | 4.656778337 | 4.141778783 | 5.319348834 | 7.149747614 | 4.379050622 |
| ENSMUSG00000016024 | -0.31008794  | 1.494731876  | 0.314532826 | 0.574911891 | 0.999071534 | Lbp           | Lbp           | LBP      | 2.666841275 | 3.853852886 | 4.914376085 | 1.665170557 | 2.354492217 | 4.511254014 | 3.559341141 | 0.552659619 | 1.964216377 | 1.372538255 |
| ENSMUSG00000025266 | -0.117063511 | 5.960015643  | 0.314295413 | 0.575056232 | 0.999071534 | Gnl3l         | Gnl3l         | GNL3L    | 65.96923153 | 74.58687586 | 70.41695048 | 51.75905149 | 73.97029717 | 86.36868573 | 60.37936882 | 46.1470782  | 46.04123189 | 53.98650468 |
| ENSMUSG00000006456 | -0.14103763  | 5.332962252  | 0.314288787 | 0.575060262 | 0.999071534 | Rbm14         | Rbm14         | RBM14    | 38.59901845 | 31.00869322 | 50.42284504 | 46.48601139 | 51.86423135 | 67.37776157 | 28.34529854 | 25.76775474 | 28.44185315 | 40.39184006 |
| ENSMUSG00000032377 | -0.336754044 | 1.374330237  | 0.314249465 | 0.575084176 | 0.999071534 | Plscr4        | Plscr4        | PLSCR4   | 0.98252047  | 3.735272798 | 2.760129034 | 4.162926393 | 2.419894779 | 3.201535107 | 2.847472913 | 2.141556024 | 0.15713731  | 2.61435858  |
| ENSMUSG00000056501 | -0.195938116 | 7.565257337  | 0.31416537  | 0.575135325 | 0.999071534 | Cebpb         | Cebpb         | CEBPB    | 263.3856659 | 217.2387227 | 272.0410104 | 195.3106299 | 99.41189363 | 163.5693391 | 80.3763945  | 271.4249555 | 113.9254499 | 220.7172231 |
| ENSMUSG00000048799 | -0.147619631 | 4.387355659  | 0.314152959 | 0.575142875 | 0.999071534 | Cep120        | Cep120        | CEP120   | 25.05427197 | 29.46715207 | 14.74312825 | 20.88401407 | 23.61032474 | 29.17762677 | 18.8968657  | 16.09621141 | 11.47102364 | 22.2874069  |
| ENSMUSG00000075587 | 0.48541108   | 0.219097379  | 0.314049832 | 0.575205614 | 0.999071534 | Gm11531       | Gm11531       |          | 2.17558104  | 0.355740266 | 1.481044848 | 0.485674746 | 0.065402562 | 0.291048646 | 0.453007054 | 0.898071881 | 2.357059653 | 1.437897219 |
| ENSMUSG00000056124 | 0.155431601  | 5.879658117  | 0.314015039 | 0.575226784 | 0.999071534 | B4gal6        | B4gal6        | B4GALT6  | 42.52910033 | 42.9852822  | 72.97511885 | 72.0880087  | 56.04999529 | 55.37200492 | 46.33615013 | 49.32487101 | 83.51848037 | 54.18258157 |
| ENSMUSG00000052727 | 0.267547599  | 7.730683853  | 0.313985291 | 0.575244886 | 0.999071534 | Map1b         | Map1b         | MAP1B    | 75.16281592 | 108.5007813 | 329.1958775 | 288.9070917 | 186.0702877 | 144.9422258 | 51.77223478 | 224.4488878 | 339.8094333 | 299.0172626 |
| ENSMUSG00000009585 | -0.128974922 | 4.951721582  | 0.313898972 | 0.575297418 | 0.999071534 | Apobec3       | Apobec3       | APOBEC3H | 33.61623607 | 33.08384478 | 30.96730136 | 28.23851737 | 41.79223686 | 46.13121041 | 28.86302089 | 24.59335305 | 16.49941757 | 30.65335435 |
| ENSMUSG00000063785 | 0.119196867  | 5.030289031  | 0.313664968 | 0.575439874 | 0.999071534 | Utp14a        | Utp14a        | UTP14C   | 35.1601968  | 30.65295296 | 30.83266092 | 26.98963945 | 38.91452415 | 42.42034017 | 38.11730786 | 31.70884565 | 22.54920401 | 31.24158503 |

|                    |              |              |             |             |             |               |               |               |             |             |             |             |             |             |             |             |             |             |
|--------------------|--------------|--------------|-------------|-------------|-------------|---------------|---------------|---------------|-------------|-------------|-------------|-------------|-------------|-------------|-------------|-------------|-------------|-------------|
| ENSMUSG00000033253 | 0.197045522  | 3.971595122  | 0.313531501 | 0.575521157 | 0.999071534 | Szt2          | Szt2          | SZT2          | 14.24654681 | 11.50226861 | 15.75293156 | 16.23541293 | 17.39708138 | 14.69795663 | 6.859821109 | 18.09960253 | 10.60676844 | 29.93440574 |
| ENSMUSG00000038816 | 0.150377663  | 5.533878134  | 0.313465608 | 0.575561295 | 0.999071534 | Ctnnal1       | Ctnnal1       | CTNNAL1       | 42.31856023 | 40.13936006 | 32.91958775 | 44.19640187 | 68.28027431 | 29.6869619  | 45.55956661 | 51.74275684 | 48.86970347 | 52.09109471 |
| ENSMUSG00000020271 | -0.122720086 | 6.064322986  | 0.313407073 | 0.575596956 | 0.999071534 | Fbxw11        | Fbxw11        | FBXW11        | 76.42605653 | 90.06157745 | 59.64571522 | 71.67171607 | 63.57128987 | 90.29784245 | 62.70911938 | 52.08816911 | 56.80513764 | 49.99960785 |
| ENSMUSG00000001583 | 0.835286912  | -0.879264017 | 0.313340428 | 0.575637563 | 0.999071534 | Tnk1          | Tnk1          | TNK1          | 0.421080201 | 0           | 1.144443746 | 0.069382107 | 0           | 0.436572969 | 0           | 0.069082452 | 1.885647722 | 0           |
| ENSMUSG00000021096 | -0.128507366 | 5.873811701  | 0.313182449 | 0.575733842 | 0.999071534 | Ppm1a         | Ppm1a         | PPM1A         | 58.03888774 | 77.72924822 | 53.51957517 | 62.23574957 | 65.86037953 | 80.03837767 | 71.25153812 | 51.46642703 | 27.8133039  | 47.64668512 |
| ENSMUSG00000038765 | -0.357452322 | 0.911033446  | 0.313099405 | 0.575784465 | 0.999071534 | Lmx1b         | Lmx1b         | LMX1B         | 2.035220973 | 2.668051998 | 1.279084186 | 0.624438959 | 3.662543449 | 2.473913492 | 0.711868228 | 1.312566595 | 0.31427462  | 2.875794438 |
| ENSMUSG00000059252 | -0.381779887 | 0.479144066  | 0.313065065 | 0.575805401 | 0.999071534 | Tpt1-ps5      | Tpt1-ps5      |               | 1.824680872 | 1.48225111  | 1.211763966 | 0.277528426 | 2.681505025 | 0.727621615 | 1.359021163 | 1.588896405 | 0.235705965 | 1.372538255 |
| ENSMUSG00000029804 | -0.20585076  | 2.595440447  | 0.312981574 | 0.57585631  | 0.999071534 | Herc3         | Herc3         | HERC3         | 7.018003354 | 8.656346483 | 5.654898509 | 6.105625376 | 5.428412612 | 6.621356699 | 3.818202315 | 6.63191543  | 4.635550651 | 4.836563373 |
| ENSMUSG00000033216 | -0.17170671  | 3.629365886  | 0.312839593 | 0.575942903 | 0.999071534 | Eefsec        | Eefsec        | EEFSEC        | 15.08870721 | 15.23754141 | 12.99280253 | 10.68484441 | 13.53833025 | 20.59169171 | 11.45460695 | 7.115492597 | 9.271101302 | 8.823460208 |
| ENSMUSG00000023027 | 0.115468409  | 6.334273928  | 0.312766284 | 0.575987623 | 0.999071534 | Atf1          | Atf1          | ATF1          | 74.60137565 | 87.33423541 | 76.27380965 | 78.26301619 | 85.02333007 | 96.19157753 | 100.8911425 | 77.16509932 | 61.75496291 | 71.50270717 |
| ENSMUSG00000073795 | -0.657998938 | -0.829409192 | 0.312627168 | 0.576072507 | 0.999071534 | 6430531B16Rik | 6430531B16Rik |               | 1.052700503 | 0.652190488 | 0.403921322 | 0           | 0.719428178 | 0.218286485 | 0.064715293 | 0           | 1.099961171 | 0.065358965 |
| ENSMUSG00000016252 | 0.211663371  | 8.65447196   | 0.312419997 | 0.576198962 | 0.999071534 | Atp5e         | Atp5e         | ATP5E         | 499.4011187 | 203.7798826 | 392.0729633 | 588.5684099 | 234.5335859 | 226.5086088 | 377.290161  | 334.9117292 | 586.6721476 | 459.6695974 |
| ENSMUSG00000070643 | -0.254771174 | 1.841490091  | 0.312151628 | 0.576362852 | 0.999071534 | Sox13         | Sox13         | SOX13         | 3.509001677 | 2.371601776 | 5.85685917  | 4.509836926 | 3.139322957 | 5.23887563  | 2.9769035   | 2.348803381 | 2.828471584 | 2.091486864 |
| ENSMUSG00000039844 | -0.123907719 | 6.024127238  | 0.311940277 | 0.576491988 | 0.999071534 | Rapgef1       | Rapgef1       | RAPGEF1       | 70.32039361 | 91.30666839 | 59.78035566 | 53.77113258 | 77.95985342 | 92.48070729 | 48.21289364 | 57.13118813 | 46.1983692  | 61.96029835 |
| ENSMUSG00000020532 | 0.141667874  | 5.07078063   | 0.311898092 | 0.57651777  | 0.999071534 | Acaca         | Acaca         | ACACA         | 34.87947667 | 32.78739456 | 32.04442488 | 29.55677739 | 36.29842169 | 66.65013995 | 26.59798562 | 20.44840591 | 29.93465759 | 31.37230296 |
| ENSMUSG00000097924 | 0.342486793  | 1.012905854  | 0.311801957 | 0.576576532 | 0.999071534 | A730020E08Rik | A730020E08Rik |               | 0.701800335 | 1.304380977 | 1.615685288 | 3.30341114  | 1.569661478 | 0.582097292 | 1.812028217 | 1.865226215 | 2.435628308 | 3.071871332 |
| ENSMUSG00000028708 | -0.146673675 | 4.212593271  | 0.311595586 | 0.576702717 | 0.999071534 | Mknk1         | Mknk1         | MKNK1         | 25.12445201 | 23.3602775  | 14.47384737 | 17.62305506 | 20.14398897 | 27.57685922 | 16.17882337 | 14.3691501  | 12.57098482 | 15.75151045 |
| ENSMUSG00000082120 | 0.407958111  | 0.088887617  | 0.311592358 | 0.576704691 | 0.999071534 | Gm15720       | Gm15720       |               | 1.473780704 | 1.363671021 | 0.605881983 | 0.555056852 | 0.196207685 | 0.582097292 | 1.100159989 | 0.898071881 | 1.571373102 | 0.784307574 |
| ENSMUSG00000083396 | -0.174599922 | 5.959431969  | 0.311447098 | 0.576793543 | 0.999071534 | Gm15542       | Gm15542       |               | 73.96975535 | 63.97395792 | 65.50257439 | 44.33516608 | 96.53418092 | 91.60756136 | 99.98512843 | 42.07121351 | 20.89926226 | 39.99968628 |
| ENSMUSG00000020263 | 0.225290489  | 6.198121081  | 0.311407157 | 0.576817979 | 0.999071534 | Appl2         | Appl2         | APPL2         | 50.17872398 | 98.5400538  | 48.80715975 | 55.0893926  | 99.93511412 | 29.39591325 | 32.81065379 | 158.7514756 | 60.57643308 | 87.12349968 |
| ENSMUSG00000048200 | -0.189935994 | 3.087310328  | 0.311316196 | 0.576873636 | 0.999071534 | Efcab4a       | Cracr2b       | CRACR2B       | 11.22880537 | 8.419186306 | 9.694111729 | 8.256470679 | 8.763943254 | 10.84156207 | 7.895265804 | 5.319348834 | 4.32127603  | 10.32671639 |
| ENSMUSG00000002326 | 0.16079868   | 4.904202783  | 0.311308837 | 0.576878139 | 0.999071534 | Gmpr2         | Gmpr2         | GMPR2         | 37.26559781 | 23.00453723 | 25.51436351 | 23.45115201 | 37.67187548 | 34.78031321 | 51.70751949 | 25.14601267 | 12.80669078 | 31.17622607 |
| ENSMUSG00000067818 | -0.264174291 | 5.513401029  | 0.311286528 | 0.576891791 | 0.999071534 | Myl9          | Myl9          | MYL9          | 36.14271727 | 39.84290984 | 80.58230375 | 66.88435071 | 32.04272518 | 131.6267502 | 44.32997603 | 9.118883716 | 17.28510412 | 18.95409971 |
| ENSMUSG00000031483 | -0.112972581 | 6.12282428   | 0.31118292  | 0.576955204 | 0.999071534 | Erlin2        | Erlin2        | ERLIN2        | 70.74147381 | 76.83989755 | 66.57969792 | 72.29615502 | 89.07828889 | 72.32558855 | 70.4749546  | 60.03265113 | 56.0901974  | 63.59427246 |
| ENSMUSG00000090958 | -0.266014051 | 2.189854128  | 0.311031711 | 0.577047775 | 0.999071534 | Lrrc32        | Lrrc32        | LRRC32        | 2.807201342 | 7.707705773 | 7.87646578  | 1.387642131 | 5.493815174 | 4.365729691 | 3.559341141 | 4.697606763 | 2.592765618 | 4.313691657 |
| ENSMUSG00000038506 | 0.158060437  | 3.850430537  | 0.310950559 | 0.577097469 | 0.999071534 | Dcun1d2       | Dcun1d2       | DCUN1D2       | 17.96608859 | 13.34025999 | 11.915679   | 14.91715291 | 11.96866877 | 23.28389169 | 15.72581632 | 13.12566595 | 8.721120716 | 14.11753633 |
| ENSMUSG00000040463 | 0.145023438  | 7.269485279  | 0.310678941 | 0.577263859 | 0.999071534 | Mybbp1a       | Mybbp1a       | MYBBP1A       | 163.0282179 | 137.3157428 | 171.7338821 | 99.07764815 | 193.5261798 | 263.0352139 | 157.452309  | 116.1966849 | 129.2454376 | 134.378031  |
| ENSMUSG00000028621 | -0.265602896 | 2.016034949  | 0.310663556 | 0.577273286 | 0.999071534 | Cyb5rl        | Cyb5rl        | RP11-446E24.4 | 5.75476275  | 3.438822576 | 3.164050356 | 5.61995063  | 4.120361381 | 6.184783729 | 3.559341141 | 0.967154334 | 3.69272679  | 3.071871332 |
| ENSMUSG00000022754 | 0.452895455  | 0.910445566  | 0.310579265 | 0.577324943 | 0.999071534 | Tmem45a       | Tmem45a       |               | 2.105401006 | 1.719411288 | 2.01960661  | 0.693821065 | 1.111843547 | 1.8918162   | 6.859821109 | 0.621742072 | 0           | 0.71894861  |
| ENSMUSG00000094484 | -0.41125784  | 0.104187512  | 0.3105497   | 0.577343063 | 0.999071534 | Gm21244       | Gm21244       |               | 2.315941107 | 1.304380977 | 0.336601102 | 1.040731598 | 0.588623054 | 1.528005392 | 0.258861174 | 1.174401691 | 0.471411931 | 0.588230681 |
| ENSMUSG00000097656 | -0.211746759 | 2.716558858  | 0.310328276 | 0.577478812 | 0.999071534 | Gm26712       | Gm26712       |               | 8.000523824 | 5.217523908 | 8.347707322 | 8.464616999 | 5.690022859 | 7.130691829 | 6.277383467 | 6.010173358 | 6.049786443 | 3.202589261 |
| ENSMUSG00000002006 | -0.235823279 | 2.876772842  | 0.310326542 | 0.577479875 | 0.999071534 | Pdzd4         | Pdzd4         | PDZD4         | 7.860163757 | 6.640484974 | 8.751628644 | 11.93372233 | 4.905192112 | 11.93299449 | 2.394465859 | 7.046410144 | 5.892649132 | 5.424794054 |
| ENSMUSG00000036902 | 0.209577035  | 3.411561238  | 0.310259003 | 0.577521294 | 0.999071534 | Neto2         | Neto2         | NETO2         | 11.36916543 | 8.241316173 | 10.09803305 | 8.256470679 | 12.81890207 | 19.8640701  | 10.35444696 | 5.112101477 | 13.59237733 | 6.078383699 |
| ENSMUSG00000093769 | 0.918482342  | 0.427539208  | 0.310230172 | 0.577538977 | 0.999071534 | Hist2h3c1     | Hist2h3c1     | HIST2H3C      | 0           | 0           | 0           | 0           | 4.447374189 | 2.764962138 | 0.19414588  | 5.043019025 | 0           | 0           |
| ENSMUSG00000084106 | -0.293224194 | 5.735503466  | 0.310188036 | 0.577564822 | 0.999071534 | Gm6136        | Gm6136        |               | 113.4109342 | 89.82441728 | 20.06142566 | 15.95788451 | 69.71913066 | 52.67980494 | 127.4244129 | 24.73151796 | 12.49241616 | 21.56845829 |
| ENSMUSG00000057176 | 0.382581409  | 0.962086651  | 0.310076921 | 0.577632987 | 0.999071534 | Gm166         | Ccdc189       | CCDC189       | 0.98252047  | 1.719411288 | 1.211763966 | 0.832585279 | 3.531738326 | 0.873145938 | 0.258861174 | 1.934308667 | 2.199922343 | 4.313691657 |
| ENSMUSG00000040283 | 0.262230439  | 1.651151547  | 0.310070925 | 0.577636666 | 0.999071534 | Btnl9         | Btnl9         | BTNL9         | 3.017741442 | 4.150303108 | 2.154247051 | 1.873316877 | 3.073920395 | 5.457162114 | 2.588611739 | 1.72706131  | 3.378452169 | 2.941153403 |
| ENSMUSG00000037280 | -0.26226522  | 2.909491871  | 0.310060911 | 0.57764281  | 0.999071534 | Galnt6        | Galnt6        | GALNT6        | 8.491784059 | 14.8225111  | 4.443134543 | 7.701413827 | 6.344048475 | 10.62327558 | 9.448432848 | 7.668152216 | 1.099961171 | 5.163358196 |
| ENSMUSG00000034442 | -0.175683062 | 3.230941572  | 0.309858813 | 0.577766836 | 0.999071534 | Trmt5         | Trmt5         | TRMT5         | 9.825204696 | 9.486407105 | 10.63659481 | 8.950291745 | 12.16487646 | 10.11394045 | 11.45460695 | 7.322739954 | 6.049786443 | 7.450921954 |

|                     |              |              |             |             |             |               |               |          |              |             |             |             |             |             |             |             |             |             |
|---------------------|--------------|--------------|-------------|-------------|-------------|---------------|---------------|----------|--------------|-------------|-------------|-------------|-------------|-------------|-------------|-------------|-------------|-------------|
| ENSMUSG00000029366  | 0.208430909  | 4.772606892  | 0.309746032 | 0.577836072 | 0.999071534 | Dck           | Dck           | DCK      | 35.861997174 | 24.4274983  | 25.85096461 | 17.34552664 | 28.38471173 | 65.41318321 | 45.75371249 | 12.57300634 | 10.60676844 | 16.73189491 |
| ENSMUSG00000016528  | -0.138247258 | 6.846894676  | 0.309640606 | 0.577900808 | 0.999071534 | Mapkapk2      | Mapkapk2      | MAPKAPK2 | 144.5708691  | 154.2726955 | 112.5594084 | 89.50291745 | 127.7966054 | 189.3271443 | 103.868046  | 104.5908329 | 60.96927636 | 90.26072998 |
| ENSMUSG00000078779  | 0.285648674  | 1.507900655  | 0.309575265 | 0.577940937 | 0.999071534 | Zfp59         | Zfp59         | ZNF780B  | 2.315941107  | 3.379532531 | 0.673202203 | 3.330341114 | 2.943115272 | 3.128772945 | 4.012348196 | 1.796143762 | 2.357059653 | 3.137230296 |
| ENSMUSG000000062661 | -0.127884987 | 5.290288457  | 0.309453619 | 0.57801566  | 0.999071534 | Ncs1          | Ncs1          | NCS1     | 42.80982046  | 46.95771517 | 43.42154212 | 35.87054909 | 42.83867785 | 66.79566428 | 32.22821615 | 31.15618603 | 21.5278115  | 35.48991773 |
| ENSMUSG00000029440  | -0.156115127 | 5.625065707  | 0.309335286 | 0.578088367 | 0.999071534 | Psmid9        | Psmid9        | PSMD9    | 84.70730049  | 43.22244237 | 46.85487336 | 52.24472623 | 42.64247016 | 67.8870967  | 70.02194754 | 24.73151796 | 29.38467701 | 39.08466077 |
| ENSMUSG00000070544  | 0.169962039  | 7.440068246  | 0.309323754 | 0.578095454 | 0.999071534 | Top1          | Top1          | TOP1     | 121.9728983  | 122.6711019 | 225.792019  | 198.9878816 | 173.8400087 | 174.9929985 | 95.06676612 | 184.3810654 | 197.9930108 | 217.0571211 |
| ENSMUSG00000041112  | 0.214406579  | 3.123144554  | 0.309128929 | 0.578215202 | 0.999071534 | Elmo1         | Elmo1         | ELMO1    | 5.824942784  | 12.39161928 | 7.943786    | 6.938210655 | 8.175320199 | 19.35473496 | 9.383717555 | 5.043019025 | 6.756904338 | 6.013024734 |
| ENSMUSG00000034361  | -0.147076894 | 4.706725455  | 0.309048567 | 0.57826461  | 0.999071534 | Cpne2         | Cpne2         | CPNE2    | 27.08949295  | 35.09970629 | 25.44704329 | 19.49637194 | 35.44818839 | 42.12929152 | 19.60873392 | 26.38949681 | 12.57098482 | 22.94099654 |
| ENSMUSG00000071656  | 0.395415237  | 0.561575077  | 0.308909624 | 0.578350055 | 0.999071534 | Lrrn4cl       | Lrrn4cl       | LRRN4CL  | 0.350900168  | 0.474320355 | 0.605881983 | 3.399723221 | 1.046440986 | 1.964578361 | 1.423736457 | 2.141556024 | 1.257098482 | 0.653589645 |
| ENSMUSG00000027935  | -0.143065283 | 5.072552482  | 0.308359797 | 0.578688428 | 0.999071534 | Rab13         | Rab13         | RAB13    | 24.35247164  | 41.44374104 | 41.60389617 | 35.87054909 | 39.04532927 | 26.55818896 | 21.61490802 | 40.89681182 | 27.73473525 | 34.70561015 |
| ENSMUSG00000060938  | 0.165256941  | 10.54302703  | 0.308252103 | 0.578754751 | 0.999071534 | Rpl26         | Rpl26         | RPL26    | 1754.360478  | 1168.132455 | 1502.318037 | 1620.835391 | 1237.02405  | 917.7491433 | 1641.826996 | 1507.724523 | 1551.02382  | 1783.057911 |
| ENSMUSG00000029634  | 0.12680939   | 6.122776177  | 0.308248329 | 0.578757075 | 0.999071534 | Rnf6          | Rnf6          | RNF6     | 52.28412499  | 65.1597588  | 76.81237141 | 74.51638243 | 75.47455608 | 69.99719938 | 58.82620177 | 74.47088368 | 75.50447755 | 65.88183622 |
| ENSMUSG00000028893  | -0.185972602 | 3.312059581  | 0.308188113 | 0.578794165 | 0.999071534 | Sesn2         | Sesn2         | SESN2    | 10.52700503  | 16.30476221 | 7.203263577 | 11.44804758 | 8.567735569 | 12.51509178 | 6.924536402 | 10.29328541 | 7.071178959 | 7.97379367  |
| ENSMUSG00000057788  | -0.124963266 | 5.517021949  | 0.308173869 | 0.57880294  | 0.999071534 | Ddx49         | Ddx49         | DDX49    | 50.81034428  | 32.25378416 | 65.36793395 | 45.44527979 | 53.43389282 | 54.49885898 | 38.82917609 | 39.92965748 | 33.54881573 | 46.01271101 |
| ENSMUSG00000034007  | -0.21281746  | 2.626239837  | 0.308158274 | 0.578812547 | 0.999071534 | Scaper        | Scaper        | SCAPER   | 6.596923153  | 9.486407105 | 3.366011017 | 6.660682229 | 7.586697145 | 8.003837767 | 5.177223478 | 4.283112048 | 4.792687961 | 5.097999231 |
| ENSMUSG00000021809  | 0.189165566  | 3.612092795  | 0.308131639 | 0.578828956 | 0.999071534 | Nudt13        | Nudt13        | NUDT13   | 16.91338808  | 7.944865951 | 9.694111729 | 12.07248654 | 12.0994739  | 8.14936209  | 13.20191987 | 10.77686257 | 15.71373102 | 12.1567674  |
| ENSMUSG00000039983  | 0.170460344  | 3.916219076  | 0.308063443 | 0.578870972 | 0.999071534 | Ccdc32        | Ccdc32        | C15orf57 | 17.19410822  | 16.60121243 | 14.47384737 | 8.672763319 | 16.67765321 | 14.26138366 | 25.30367975 | 13.95465538 | 9.978219197 | 13.33322876 |
| ENSMUSG00000020638  | -0.250095236 | 2.546409516  | 0.308012046 | 0.578902643 | 0.999071534 | Cmpk2         | Cmpk2         | CMPK2    | 5.75476275   | 9.782857327 | 6.933982695 | 3.122194795 | 6.801866406 | 11.13261071 | 4.27120937  | 6.424668073 | 2.042785033 | 2.745076509 |
| ENSMUSG000000061286 | 0.163492737  | 4.388494776  | 0.307954409 | 0.578938163 | 0.999071534 | Exosc5        | Exosc5        | EXOSC5   | 31.01957483  | 14.64464097 | 24.03331866 | 12.35001497 | 20.6018069  | 34.63478888 | 27.05099267 | 14.85272726 | 13.04239675 | 20.0652021  |
| ENSMUSG00000070524  | -0.411034145 | 1.507378399  | 0.307608644 | 0.579151338 | 0.999071534 | Fcrlb         | Fcrlb         | FCRLB    | 6.73728322   | 5.691844263 | 0.942483085 | 0.693821065 | 2.158284533 | 5.23887563  | 4.853647011 | 1.243484143 | 0.235705965 | 0.522871716 |
| ENSMUSG00000052146  | 0.154893511  | 10.00452203  | 0.307315906 | 0.579331942 | 0.999071534 | Rps10         | Rps10         | RPS10    | 1105.826789  | 885.5561033 | 1026.835321 | 1045.588346 | 976.4602446 | 701.7910479 | 1296.894481 | 1129.567179 | 972.4442441 | 1012.606437 |
| ENSMUSG00000037997  | -0.186455577 | 3.509734093  | 0.307217813 | 0.579392486 | 0.999071534 | Parp11        | Parp11        | PARP11   | 15.65014748  | 14.58535092 | 10.70391503 | 11.93372233 | 9.352566308 | 17.9722539  | 9.772009315 | 5.043019025 | 9.113963991 | 10.19599846 |
| ENSMUSG00000047676  | -0.189530758 | 10.14217838  | 0.307141295 | 0.579439722 | 0.999071534 | Rpsa-ps10     | Rpsa-ps10     |          | 1745.307254  | 1248.707625 | 1091.395412 | 1119.688435 | 1058.736667 | 1238.411989 | 1974.851896 | 880.179526  | 356.230282  | 808.1635961 |
| ENSMUSG00000022427  | 0.141727957  | 7.382013764  | 0.307079493 | 0.579477879 | 0.999071534 | Tomm22        | Tomm22        | TOMM22   | 190.8896912  | 128.0664959 | 157.7985965 | 182.6137044 | 161.8059374 | 164.0059121 | 229.7392919 | 148.1818604 | 150.3018372 | 146.6001574 |
| ENSMUSG00000046387  | 0.197831634  | 3.566029054  | 0.307034417 | 0.579505713 | 0.999071534 | Pcdhb17       | Pcdhb17       | PCDH16   | 8.561964092  | 12.92522968 | 11.78103856 | 12.14186865 | 11.05303291 | 11.78747017 | 9.060141087 | 14.23098519 | 17.20653547 | 6.078383699 |
| ENSMUSG00000044700  | -0.165957107 | 3.879010303  | 0.306928792 | 0.579570945 | 0.999071534 | Tmem201       | Tmem201       | TMEM201  | 19.36968926  | 18.26133368 | 14.13724627 | 11.79495811 | 16.87386089 | 24.22979979 | 14.04321869 | 7.875399573 | 9.192532646 | 13.39858772 |
| ENSMUSG00000038429  | -0.175618571 | 6.415215038  | 0.306583328 | 0.579784399 | 0.999071534 | Usp5          | Usp5          | USP5     | 128.4996414  | 101.3266859 | 83.67903388 | 73.75317926 | 83.91148653 | 172.2280363 | 101.3441496 | 38.82433825 | 32.84169783 | 66.92757965 |
| ENSMUSG00000074824  | -0.444229986 | 0.370201775  | 0.306498271 | 0.579836978 | 0.999071534 | Rscan18       | Rscan18       | ZNF99    | 0.842160403  | 0           | 2.356207712 | 2.775284262 | 0.850233301 | 1.091432423 | 0.776583522 | 1.243484143 | 0.785686551 | 0.849666539 |
| ENSMUSG00000023169  | -0.195062354 | 3.691962476  | 0.306194026 | 0.580025129 | 0.999071534 | Slc38a1       | Slc38a1       | SLC38A1  | 12.63240604  | 14.94109119 | 14.67580803 | 13.18260024 | 15.5004071  | 26.99476192 | 10.9368846  | 10.98410993 | 3.8498641   | 8.823460208 |
| ENSMUSG00000024772  | -0.130490033 | 7.128665703  | 0.305853197 | 0.580236048 | 0.999071534 | Ehd1          | Ehd1          | EHD1     | 188.22285    | 147.2764703 | 148.0371645 | 122.4594181 | 155.2656812 | 183.8699822 | 152.4692314 | 101.8966173 | 90.9825026  | 128.3650063 |
| ENSMUSG00000070461  | -0.252661184 | 1.892456854  | 0.30576484  | 0.580290752 | 0.999071534 | 9230112E08Rik | 9230112E08Rik |          | 5.684582717  | 3.675982753 | 3.231370576 | 3.607869541 | 4.054958819 | 3.710870238 | 1.68259763  | 5.043019025 | 1.649941757 | 3.856178906 |
| ENSMUSG000000022015 | 0.507113736  | 0.54068886   | 0.305664427 | 0.580352933 | 0.999071534 | Tnfsf11       | Tnfsf11       | TNFSF11  | 3.017741442  | 0.5336104   | 1.750325729 | 0.069382107 | 0.327012808 | 3.128772945 | 3.947632902 | 0.414494714 | 0.078568655 | 0.457512752 |
| ENSMUSG00000045438  | 0.138609969  | 5.313411005  | 0.30554453  | 0.580427197 | 0.999071534 | Cox19         | Cox19         | COX19    | 45.1959416   | 28.28135118 | 40.79605353 | 42.53123131 | 38.71831646 | 26.77647544 | 49.96020657 | 43.86735727 | 31.58459935 | 45.4898393  |
| ENSMUSG00000057596  | -0.355524102 | 0.927514766  | 0.305279042 | 0.580591707 | 0.999071534 | Trim30d       | Trim30d       | TRIM5    | 3.509001677  | 1.778701332 | 3.298690797 | 0.555056852 | 1.24264867  | 4.074681045 | 1.100159989 | 0.552659619 | 1.335667137 | 0.849666539 |
| ENSMUSG00000024587  | -0.143437678 | 7.461725244  | 0.305109211 | 0.580696992 | 0.999071534 | Nars          | Nars          | NARS     | 183.9418679  | 207.6337355 | 213.8090198 | 180.9485339 | 173.1205805 | 303.6365    | 152.0162244 | 124.4174968 | 122.4099646 | 133.5283645 |
| ENSMUSG00000017210  | -0.132876911 | 4.930369268  | 0.305072824 | 0.580719555 | 0.999071534 | Med24         | Med24         | MED24    | 35.51109697  | 32.25378416 | 36.48755943 | 24.42250151 | 36.88704474 | 44.74872934 | 21.8090539  | 25.42234248 | 16.65655488 | 35.42455876 |
| ENSMUSG00000032593  | 0.350768824  | 0.87776471   | 0.304880762 | 0.580838677 | 0.999071534 | Amigo3        | Amigo3        | AMIGO3   | 1.965040939  | 0.415030311 | 2.086926831 | 1.734552664 | 1.569661478 | 3.201535107 | 0.323576467 | 1.657978857 | 1.414235792 | 2.875794438 |
| ENSMUSG00000089818  | -0.491775646 | -0.383935473 | 0.304818126 | 0.580877537 | 0.999071534 | Gm15950       | Gm15950       |          | 0.421080201  | 0.059290044 | 1.211763966 | 1.526406344 | 0.588623054 | 0.145524323 | 0.453007054 | 0.27632981  | 0.707117896 | 0.849666539 |
| ENSMUSG00000020780  | -0.123066998 | 6.212512588  | 0.304791043 | 0.58089434  | 0.999071534 | Srp68         | Srp68         | SRP68    | 86.81270149  | 93.97472039 | 83.00583168 | 48.22056405 | 91.36737855 | 98.37444238 | 67.04504404 | 68.18438051 | 46.98405575 | 68.36547687 |

|                    |              |              |             |             |             |               |               |           |             |             |             |             |             |             |             |             |             |             |
|--------------------|--------------|--------------|-------------|-------------|-------------|---------------|---------------|-----------|-------------|-------------|-------------|-------------|-------------|-------------|-------------|-------------|-------------|-------------|
| ENSMUSG00000051510 | 0.138338424  | 6.281851914  | 0.304736729 | 0.580928043 | 0.999071534 | Mafg          | Mafg          | MAFG      | 70.88183388 | 82.47245177 | 81.72674749 | 73.68379716 | 74.95133559 | 85.93211276 | 40.90006548 | 80.41197459 | 85.71840271 | 94.44370371 |
| ENSMUSG00000035109 | -0.27853907  | 1.617510572  | 0.304614905 | 0.58100365  | 0.999071534 | Shc4          | Shc4          | SHC4      | 2.807201342 | 5.691844263 | 3.366011017 | 1.457024238 | 3.466335765 | 3.929156722 | 4.206494076 | 1.381649048 | 1.649941757 | 1.960768935 |
| ENSMUSG00000006575 | -0.145406454 | 4.427427019  | 0.304580332 | 0.58102511  | 0.999071534 | Rundc3a       | Rundc3a       | RUNDCC3A  | 25.05427197 | 20.6922255  | 20.66730764 | 25.393851   | 24.65676572 | 22.04693494 | 19.73816451 | 12.15851162 | 15.63516236 | 28.95402128 |
| ENSMUSG00000036526 | -0.493627856 | 0.402534856  | 0.304533464 | 0.581054206 | 0.999071534 | Card11        | Card11        | CARD11    | 2.035220973 | 2.905212176 | 1.144443746 | 0.277528426 | 0.850233301 | 2.837724299 | 0           | 0.345412262 | 0.15713731  | 1.830051006 |
| ENSMUSG00000097350 | 0.417746415  | 0.046016044  | 0.30452025  | 0.581062409 | 0.999071534 | 4732491K20Rik | 4732491K20Rik |           | 1.403600671 | 0.118580089 | 1.144443746 | 0.346910533 | 1.046440986 | 0.436572969 | 1.359021163 | 0.828989429 | 1.099961171 | 1.111102397 |
| ENSMUSG00000062014 | 0.148906829  | 7.258687471  | 0.304473065 | 0.581091705 | 0.999071534 | Gmfb          | Gmfb          | GMFB      | 182.047007  | 154.4505657 | 123.8018852 | 148.8940007 | 144.6704663 | 184.3065551 | 257.566868  | 109.9101818 | 107.2462142 | 128.2996473 |
| ENSMUSG00000037234 | -0.124784793 | 5.911384597  | 0.304434903 | 0.581115401 | 0.999071534 | Hook3         | Hook3         | HOOX3     | 42.88000049 | 68.30213116 | 78.29341626 | 64.03968434 | 71.15798702 | 65.63146969 | 43.16510075 | 63.69402111 | 51.30533178 | 52.81004332 |
| ENSMUSG00000040183 | 0.184424664  | 3.434575868  | 0.304255083 | 0.581227081 | 0.999071534 | Ankrd6        | Ankrd6        | ANKRD6    | 6.386383052 | 13.10309981 | 9.357510628 | 8.117706466 | 15.10799173 | 12.22404314 | 9.254286968 | 13.60924312 | 10.29249382 | 9.150255031 |
| ENSMUSG00000093076 | 0.504052994  | -0.425565335 | 0.304234655 | 0.581239771 | 0.999071534 | Mir3082       | Mir3082       |           | 0.912340436 | 0.296450222 | 0.269280881 | 0.971349492 | 0.196207685 | 0.072762162 | 0.258861174 | 0.414494714 | 1.178529826 | 1.372538255 |
| ENSMUSG00000030956 | -0.232552469 | 2.879526161  | 0.304232221 | 0.58124129  | 0.999071534 | Fam53b        | Fam53b        | FAM53B    | 11.64988557 | 6.936935196 | 8.280387102 | 6.175007483 | 7.652099707 | 17.09910796 | 4.724216424 | 3.523205072 | 3.614158135 | 5.424794054 |
| ENSMUSG00000083022 | -0.344826551 | 4.32653509   | 0.303494798 | 0.581699746 | 0.999071534 | Rps15a-ps6    | Rps15a-ps6    |           | 58.10906777 | 19.74358479 | 5.587578288 | 24.00620887 | 8.633138131 | 30.56010784 | 35.39926553 | 11.88218181 | 0.707117896 | 12.09140843 |
| ENSMUSG00000009894 | -0.123682467 | 5.074298883  | 0.303342404 | 0.581794582 | 0.999071534 | Snap47        | Snap47        | SNAP47    | 34.24785637 | 42.15522157 | 31.37122268 | 28.93233843 | 45.71639056 | 35.94450779 | 30.7397644  | 36.61369977 | 19.48502646 | 33.98666154 |
| ENSMUSG00000040952 | 0.155826863  | 9.78169707   | 0.30302429  | 0.581992645 | 0.999071534 | Rps19         | Rps19         | RPS19     | 1147.092648 | 808.1825953 | 696.0910783 | 900.0246862 | 770.2459679 | 717.5804369 | 1291.264251 | 833.7561179 | 768.5585842 | 816.2681077 |
| ENSMUSG00000031629 | -0.311635063 | 2.765096389  | 0.302997753 | 0.582009173 | 0.999071534 | Mf1ip         | Cenpu         | CENPU     | 8.561964092 | 3.083082309 | 4.106533441 | 13.8070392  | 8.306125323 | 11.3508972  | 12.61948223 | 2.625133191 | 2.435628308 | 1.30717929  |
| ENSMUSG00000063047 | 0.187261095  | 3.071498735  | 0.302658944 | 0.582220283 | 0.999071534 | Zfp780b       | Zfp780b       | ZNF780B   | 8.281243958 | 8.656346483 | 8.415027543 | 6.105625376 | 8.829345815 | 7.421740475 | 8.607134033 | 8.566224097 | 9.899650542 | 7.058768167 |
| ENSMUSG00000032633 | 0.18206763   | 5.46592988   | 0.302539983 | 0.582294444 | 0.999071534 | Ficn          | Ficn          | FLCN      | 30.73885469 | 49.8036373  | 50.35552482 | 36.42560594 | 47.22064947 | 31.36049162 | 19.02629628 | 80.61922194 | 32.84169783 | 58.62699116 |
| ENSMUSG00000036503 | 0.140985462  | 6.959836448  | 0.302475203 | 0.582334835 | 0.999071534 | Rnf13         | Rnf13         | RNF13     | 108.0070716 | 143.0668772 | 100.3744485 | 124.1245886 | 138.4572229 | 92.62623162 | 155.1225585 | 141.2736151 | 122.567102  | 104.7050611 |
| ENSMUSG00000099021 | -0.292687951 | 5.032397816  | 0.302466777 | 0.58234009  | 0.999071534 | Metazoa_SRP   | Rn7s1         |           | 44.7748614  | 12.92522968 | 20.12874588 | 89.0172427  | 15.04258917 | 9.895653967 | 10.9368846  | 32.05425791 | 48.4768602  | 29.60761092 |
| ENSMUSG00000099250 | -0.292687853 | 5.032397816  | 0.302432738 | 0.582361317 | 0.999071534 | Metazoa_SRP   | Rn7s2         |           | 44.7748614  | 12.92522968 | 20.12874588 | 89.0172427  | 15.04258917 | 9.895653967 | 10.9368846  | 32.05425791 | 48.4768602  | 29.60761092 |
| ENSMUSG00000032288 | 0.118048258  | 5.5511921    | 0.302259257 | 0.582469524 | 0.999071534 | Imp3          | Imp3          | IMP3      | 46.73990234 | 35.04041624 | 49.21108107 | 54.32618943 | 46.63202642 | 51.51561036 | 44.78298309 | 44.6963467  | 46.43407516 | 45.75127515 |
| ENSMUSG00000020097 | 0.135581933  | 7.922545272  | 0.302189893 | 0.5825128   | 0.999071534 | Sgpl1         | Sgpl1         | SGPL1     | 208.5750597 | 260.8761954 | 255.9514777 | 223.4103831 | 251.1458365 | 246.2271546 | 256.8549998 | 269.0070696 | 200.9000511 | 248.2987062 |
| ENSMUSG00000089669 | -0.487368412 | 2.786429299  | 0.302116912 | 0.582558341 | 0.999071534 | Tnfsf13       | Tnfsf13       | TNFSF13   | 16.35194782 | 7.885575906 | 10.63659481 | 0           | 6.736463844 | 5.23887563  | 11.00159989 | 6.770080335 | 0           | 5.097999231 |
| ENSMUSG00000079445 | -0.273746021 | 2.855119445  | 0.301979532 | 0.582644085 | 0.999071534 | B3gnt7        | B3gnt7        | B3GNT7    | 9.404124495 | 9.782857327 | 6.799342255 | 5.897479057 | 8.633138131 | 13.6065242  | 8.154126978 | 3.868617334 | 0.549980586 | 7.25484506  |
| ENSMUSG00000057506 | 0.139350674  | 5.579197674  | 0.301977612 | 0.582645284 | 0.999071534 | Bloc1s2       | Bloc1s2       | BLOC1S2   | 60.14428875 | 34.50680584 | 48.67251931 | 50.51017357 | 41.33441893 | 41.54719423 | 71.05739224 | 34.61030865 | 47.37689902 | 43.39835243 |
| ENSMUSG00000000078 | 0.15392168   | 7.944602215  | 0.301895318 | 0.582696659 | 0.999071534 | Klf6          | Klf6          | KLF6      | 246.4020978 | 267.9317107 | 289.1403464 | 200.3061416 | 207.7839382 | 191.7282956 | 229.8687224 | 346.5866637 | 234.1345922 | 223.9198124 |
| ENSMUSG00000035944 | 0.21158391   | 3.531610956  | 0.301875374 | 0.582709112 | 0.999071534 | Ttc38         | Ttc38         | TTC38     | 8.140883891 | 8.834216617 | 13.80064517 | 12.90507182 | 11.05303291 | 10.04117829 | 4.724216424 | 10.08603805 | 15.24231909 | 17.32012559 |
| ENSMUSG00000041408 | 0.126209584  | 6.187276235  | 0.301830094 | 0.582737385 | 0.999071534 | Wapl          | Wapl          | WAPL      | 70.39057364 | 100.140885  | 56.81826597 | 60.22366848 | 74.62432278 | 95.75500456 | 92.47815438 | 72.53657501 | 54.99805857 | 55.29368397 |
| ENSMUSG00000029020 | -0.125864578 | 5.376420819  | 0.301784478 | 0.58276587  | 0.999071534 | Mfn2          | Mfn2          | MFN2      | 52.00340485 | 58.3414037  | 34.26599215 | 36.70313436 | 43.81971627 | 62.57545891 | 36.7582867  | 30.05086679 | 31.42746204 | 34.57489222 |
| ENSMUSG00000031386 | -0.129982576 | 6.150632099  | 0.30170562  | 0.582815121 | 0.999071534 | Hcfc1         | Hcfc1         | HCFC1     | 66.60085183 | 69.31006191 | 79.03393868 | 71.53295185 | 98.69246545 | 118.5295611 | 45.55956661 | 61.06888792 | 48.00544826 | 64.05178521 |
| ENSMUSG00000096243 | -0.77088004  | -0.257504519 | 0.30168462  | 0.582828238 | 0.999071534 | Gm24265       | Gm24265       |           | 1.263240604 | 0           | 0           | 2.775284262 | 0.588623054 | 0           | 0           | 0.483577167 | 1.649941757 | 0.065358965 |
| ENSMUSG00000036403 | 0.197883342  | 2.725374112  | 0.301576146 | 0.582896002 | 0.999071534 | Cep135        | Cep135        | CEP135    | 6.456563086 | 6.699775018 | 7.068623136 | 4.371072713 | 6.867268968 | 9.531843159 | 6.406814054 | 7.875399573 | 5.656943167 | 4.313691657 |
| ENSMUSG00000025173 | 0.129975536  | 5.696338439  | 0.30156881  | 0.582900586 | 0.999071534 | Wdr45b        | Wdr45b        | WDR45B    | 54.17898589 | 58.2282361  | 45.57578917 | 49.67758829 | 48.85571351 | 62.93926972 | 83.87102035 | 36.47553486 | 38.81291562 | 41.82973728 |
| ENSMUSG00000043587 | -0.119135095 | 5.258516326  | 0.301514916 | 0.58293426  | 0.999071534 | Acpl2         | Pxylp1        | PXYLP1    | 37.40595788 | 45.0011437  | 47.662716   | 38.29892282 | 37.73727804 | 35.79898347 | 40.64120431 | 42.07121351 | 25.61383156 | 32.61412329 |
| ENSMUSG00000022884 | 0.168029665  | 8.683004952  | 0.301510844 | 0.582936804 | 0.999071534 | Eif4a2        | Eif4a2        | EIF4A2    | 372.0945378 | 632.0911634 | 300.2481827 | 303.1304235 | 410.2702689 | 283.5541435 | 454.9485132 | 569.7229849 | 351.9090062 | 399.7354269 |
| ENSMUSG00000028982 | 0.173702275  | 3.783211441  | 0.301431384 | 0.58298646  | 0.999071534 | Skc25a33      | Skc25a33      | SLC25A33  | 14.45708691 | 14.34819075 | 17.03201575 | 8.672763319 | 12.29568158 | 14.11585934 | 23.49165153 | 9.740625788 | 9.742513232 | 13.13715187 |
| ENSMUSG00000028830 | -0.155663905 | 4.738245148  | 0.301348221 | 0.583038439 | 0.999071534 | AU040320      | AU040320      | KIAA0319L | 34.03731627 | 46.54268486 | 19.79214478 | 18.80255087 | 27.0766605  | 39.65537803 | 29.89465559 | 19.27400422 | 16.73512354 | 19.21553556 |
| ENSMUSG00000095762 | -0.180437306 | 5.603577376  | 0.301242039 | 0.583104819 | 0.999071534 | Gm16378       | Gm16378       |           | 52.28412499 | 82.35387168 | 36.21827854 | 37.46633754 | 60.75897972 | 50.4969401  | 62.83854997 | 51.12101477 | 10.52819978 | 51.30678714 |
| ENSMUSG00000036537 | -0.220408812 | 2.300370984  | 0.301230438 | 0.583112073 | 0.999071534 | Rnf113a1      | Rnf113a1      | RNF113B   | 4.421342113 | 3.260952442 | 5.789538949 | 7.007592761 | 6.14784079  | 5.311637791 | 3.235764674 | 4.973936572 | 3.928432755 | 3.92153787  |
| ENSMUSG00000034152 | -0.120279383 | 5.039534279  | 0.301043543 | 0.583228951 | 0.999071534 | Exoc3         | Exoc3         | EXOC3     | 33.54605603 | 40.79155055 | 38.50716604 | 25.74076153 | 39.24153696 | 44.53044285 | 26.33912445 | 29.49820717 | 22.54920401 | 31.37230296 |

|                     |              |             |             |             |             |               |               |              |             |             |             |             |             |             |             |             |             |             |
|---------------------|--------------|-------------|-------------|-------------|-------------|---------------|---------------|--------------|-------------|-------------|-------------|-------------|-------------|-------------|-------------|-------------|-------------|-------------|
| ENSMUSG00000025165  | -0.342518974 | 0.836446701 | 0.301038941 | 0.58323183  | 0.999071534 | Sectm1a       | Sectm1a       | SECTM1       | 3.649361744 | 1.48225111  | 2.154247051 | 0.624438959 | 1.765869163 | 3.274297269 | 2.006174098 | 0.759906976 | 0.785686551 | 0.588230681 |
| ENSMUSG00000059734  | 0.140926229  | 6.569096573 | 0.300908984 | 0.58331313  | 0.999071534 | Ndufs8        | Ndufs8        | NDUFS8       | 102.6733891 | 56.62199241 | 110.2032007 | 113.0234516 | 83.38826603 | 82.87610197 | 105.1623519 | 87.04389002 | 102.2963889 | 93.20188338 |
| ENSMUSG00000038002  | 0.177291575  | 4.368051051 | 0.300726304 | 0.583427452 | 0.999071534 | Cramp1l       | Cramp1l       | CRAMP1       | 11.43934547 | 19.44713457 | 30.42873959 | 18.10872981 | 20.34019666 | 21.31931333 | 10.09558578 | 24.80060041 | 24.04200846 | 22.74491965 |
| ENSMUSG00000074677  | -0.231825156 | 2.422698067 | 0.300507809 | 0.583564245 | 0.999071534 | Sirpb1c       | Sirpb1c       | SIRPG        | 7.71980369  | 8.834216617 | 4.443134543 | 2.150845303 | 6.474853598 | 6.112021568 | 5.306654065 | 4.973936572 | 3.535589479 | 3.529384083 |
| ENSMUSG00000035203  | -0.12091151  | 6.216284293 | 0.300273007 | 0.583711321 | 0.999071534 | Epn1          | Epn1          | EPN1         | 88.2864822  | 79.80439977 | 68.53198431 | 69.59025287 | 96.53418092 | 103.6860802 | 57.27303473 | 62.93411413 | 43.84130954 | 84.24770525 |
| ENSMUSG00000032643  | 0.110251371  | 5.809573995 | 0.300196176 | 0.583759462 | 0.999071534 | Fhl3          | Fhl3          | FHL3         | 54.88078623 | 55.55477161 | 61.12676007 | 46.41662928 | 62.06703095 | 80.69323713 | 63.67984878 | 50.22294289 | 41.95566182 | 48.88850545 |
| ENSMUSG00000037197  | -0.117360841 | 6.47931933  | 0.300185148 | 0.583766373 | 0.999071534 | Rbm17         | Rbm17         | RBM17        | 88.77774243 | 89.52796705 | 117.5411047 | 87.76836478 | 97.71142702 | 119.4754692 | 82.12370743 | 70.11868918 | 58.76935401 | 90.39144791 |
| ENSMUSG00000083240  | -0.519431481 | 4.062202171 | 0.300085517 | 0.583828814 | 0.999071534 | Gm13453       | Gm13453       |              | 25.12445201 | 20.75151554 | 27.93789144 | 0           | 29.16954247 | 12.6606161  | 31.06334087 | 17.82327272 | 0           | 6.53589645  |
| ENSMUSG00000006398  | 0.166296899  | 6.339960151 | 0.300055555 | 0.583847595 | 0.999071534 | Cdc20         | Cdc20         | CD20         | 105.3402303 | 39.54645962 | 97.21039817 | 77.98548776 | 75.40915352 | 124.5688205 | 101.5382955 | 38.13351372 | 86.2683833  | 66.01255415 |
| ENSMUSG00000036779  | 0.126477654  | 5.21135271  | 0.299988167 | 0.583889839 | 0.999071534 | Papd5         | Papd5         | PAPD5        | 23.8612114  | 45.11972379 | 36.48755943 | 34.13599642 | 43.68891115 | 53.77123736 | 32.09878557 | 36.89002958 | 30.7989128  | 34.90168705 |
| ENSMUSG00000066232  | 0.141261019  | 7.213462168 | 0.299984181 | 0.583892338 | 0.999071534 | Ipo7          | Ipo7          | IPO7         | 153.9048136 | 185.2220987 | 132.6208341 | 106.779062  | 157.096953  | 245.4267708 | 188.2567887 | 121.9305285 | 102.6892322 | 114.5742648 |
| ENSMUSG00000068115  | 0.175926397  | 3.879251879 | 0.299840308 | 0.583982551 | 0.999071534 | Ninl          | Ninl          | NINL         | 11.01826527 | 11.26510844 | 19.11894258 | 12.14186865 | 17.59328907 | 17.89949173 | 8.089411685 | 12.9184186  | 17.91365336 | 16.86261284 |
| ENSMUSG00000028779  | 0.118085203  | 5.471177702 | 0.29970303  | 0.584068654 | 0.999071534 | Pef1          | Pef1          | PEF1         | 51.02088438 | 43.57818264 | 34.66991348 | 39.33965441 | 52.25664672 | 42.71138881 | 45.36542073 | 46.83790272 | 34.57020824 | 52.15645367 |
| ENSMUSG00000072066  | 0.280184898  | 1.69205689  | 0.299636131 | 0.584110624 | 0.999071534 | 6720489N17Rik | 6720489N17Rik | ZNF69        | 3.438821644 | 2.312311732 | 3.231370576 | 3.330341114 | 2.158284533 | 5.384399953 | 6.018522294 | 0.967154334 | 1.885647722 | 2.745076509 |
| ENSMUSG00000010538  | -0.430522068 | 0.110396591 | 0.299556244 | 0.58416075  | 0.999071534 | Tsacc         | Tsacc         | TSACC        | 1.754500839 | 0.415030311 | 1.279084186 | 1.734552664 | 0.39241537  | 0.654859454 | 2.070889391 | 0.345412262 | 0.15713731  | 0.71894861  |
| ENSMUSG00000006638  | -0.201112286 | 2.806524009 | 0.299539929 | 0.584170988 | 0.999071534 | Abhd1         | Abhd1         |              | 7.018003354 | 9.249246928 | 7.87646578  | 6.591300122 | 7.39048946  | 7.494502637 | 8.477703446 | 5.526596192 | 5.971217787 | 3.33330719  |
| ENSMUSG00000078578  | 0.145504544  | 8.723949054 | 0.299501113 | 0.584195347 | 0.999071534 | Ube2d3        | Ube2d3        | UBE2D3       | 427.6069444 | 495.2497409 | 348.3821403 | 411.7134203 | 401.2447154 | 435.6998232 | 624.8908738 | 401.299966  | 310.8175996 | 378.4284045 |
| ENSMUSG00000037151  | 0.234958408  | 2.890699495 | 0.299384669 | 0.584268435 | 0.999071534 | Lrrc20        | Lrrc20        | LRRC20       | 8.632144126 | 10.25717768 | 6.664701814 | 2.705902155 | 6.801866406 | 15.86215121 | 8.477703446 | 3.661369977 | 4.085570065 | 7.97379367  |
| ENSMUSG00000033594  | -0.257084488 | 1.572297971 | 0.299185402 | 0.584393552 | 0.999071534 | Spata2l       | Spata2l       | SPATA2L      | 3.36864161  | 1.778701332 | 3.567971678 | 2.983430582 | 4.381971627 | 3.419821592 | 1.48845175  | 3.246875263 | 1.964216377 | 2.483640651 |
| ENSMUSG00000022451  | 0.137947916  | 7.368925305 | 0.298989985 | 0.584516303 | 0.999071534 | Twf1          | Twf1          | TWF1         | 166.8179397 | 157.6522281 | 136.862008  | 166.3089094 | 189.0788056 | 208.3180684 | 230.645306  | 127.3189598 | 142.9163836 | 131.8290314 |
| ENSMUSG00000090000  | 0.131894661  | 6.681205574 | 0.29895573  | 0.584537826 | 0.999071534 | Ier3ip1       | Ier3ip1       | RP11-49K24.6 | 105.5507704 | 83.89541284 | 105.5581055 | 125.2347023 | 84.89252495 | 93.86318836 | 129.5600175 | 82.06995344 | 98.44652484 | 107.5808556 |
| ENSMUSG00000035342  | -0.121148732 | 5.772659701 | 0.298901987 | 0.584571596 | 0.999071534 | Ltts2         | Ltts2         | LZTS2        | 62.60058992 | 65.63407916 | 54.05813693 | 46.48601139 | 67.36463844 | 59.88325893 | 34.62268201 | 63.90126846 | 37.7915231  | 57.31981187 |
| ENSMUSG00000022752  | 0.131275166  | 6.413491267 | 0.298665006 | 0.584720555 | 0.999071534 | Tomm70a       | Tomm70a       | TOMM70       | 92.77800434 | 86.44488475 | 83.47707322 | 78.60992672 | 80.77216357 | 127.2610205 | 126.5183988 | 56.71669342 | 62.69778677 | 66.07791311 |
| ENSMUSG00000034201  | -0.1415562   | 5.26888668  | 0.29852685  | 0.584807431 | 0.999071534 | Gas2l1        | Gas2l1        | GAS2L1       | 57.68798757 | 48.97357668 | 36.01631788 | 27.19778577 | 40.81119844 | 63.73965349 | 39.54104432 | 25.56050739 | 20.03500705 | 34.83632808 |
| ENSMUSG00000024589  | 0.151223232  | 4.787681996 | 0.298419717 | 0.584874817 | 0.999071534 | Nedd4l        | Nedd4l        | NEDD4L       | 21.68563036 | 31.83875385 | 28.67841387 | 17.83120138 | 35.90600632 | 29.46867542 | 17.47312924 | 41.10405917 | 23.64916518 | 27.12397027 |
| ENSMUSG00000038069  | 0.139874116  | 4.514920905 | 0.298391029 | 0.584892863 | 0.999071534 | Cdkn2aip      | Cdkn2aip      | CDKN2AIP     | 23.93139144 | 20.09932505 | 18.37842015 | 24.63064782 | 25.11458365 | 19.50025929 | 19.28515746 | 26.66582662 | 20.89926226 | 27.05861131 |
| ENSMUSG00000020928  | -0.469429262 | 0.360035964 | 0.29838652  | 0.5848957   | 0.999071534 | Higd1b        | Higd1b        | HIGD1B       | 2.105401006 | 0.889350666 | 2.154247051 | 0.901967385 | 0.850233301 | 1.600767553 | 2.653327033 | 0.069082452 | 0           | 0.588230681 |
| ENSMUSG00000038025  | -0.153142372 | 5.075999998 | 0.29815407  | 0.585041974 | 0.999071534 | Phf2          | Phf2          | PHF2         | 25.68589228 | 42.21451162 | 37.16076163 | 24.90817625 | 54.74194406 | 46.42225905 | 20.19117157 | 43.79827482 | 19.40645781 | 27.12397027 |
| ENSMUSG00000045629  | 0.160230385  | 3.78396676  | 0.298130312 | 0.585056928 | 0.999071534 | Sh3tc2        | Sh3tc2        | SH3TC2       | 10.6673651  | 13.93316044 | 14.00260583 | 13.18260024 | 15.04258917 | 20.73721603 | 9.836724609 | 14.23098519 | 14.37806388 | 10.65351121 |
| ENSMUSG00000029482  | -0.122827019 | 5.816395337 | 0.297944582 | 0.585173861 | 0.999071534 | Aacs          | Aacs          | AACS         | 71.16255401 | 56.02909196 | 56.27970421 | 56.82394526 | 64.48692573 | 95.10014511 | 52.09581125 | 38.34076108 | 33.23454111 | 51.11071024 |
| ENSMUSG00000063439  | 0.171735047  | 3.714336555 | 0.297761753 | 0.585289015 | 0.999071534 | B9d2          | B9d2          | B9D2         | 18.31698875 | 9.486407105 | 12.05031944 | 12.76630761 | 10.85682522 | 10.84156207 | 17.34369865 | 11.74401691 | 8.642552061 | 17.84299731 |
| ENSMUSG00000000732  | -0.238550566 | 2.261032668 | 0.297743316 | 0.585300663 | 0.999071534 | Icosl         | Icosl         | ICOSLG       | 5.895122818 | 5.929004441 | 3.769932339 | 6.730064335 | 3.727946011 | 8.658697221 | 3.947632902 | 1.865226215 | 2.907040239 | 4.182973728 |
| ENSMUSG000000005417 | -0.141541062 | 7.999766643 | 0.297721547 | 0.585314344 | 0.999071534 | Mprp          | Mprp          | MPRIP        | 306.0551263 | 287.4381353 | 280.8599593 | 223.6879115 | 299.7399398 | 404.9214289 | 239.25244   | 210.1488202 | 150.1446999 | 209.932994  |
| ENSMUSG00000035799  | 0.141592664  | 5.929972085 | 0.297675756 | 0.585343195 | 0.999071534 | Twist1        | Twist1        | TWIST1       | 42.80982046 | 44.94185366 | 81.45746661 | 67.64755389 | 62.06703095 | 60.02878326 | 41.93551017 | 75.57620292 | 63.09063004 | 62.4178111  |
| ENSMUSG00000026245  | -0.149290004 | 5.235116911 | 0.297585432 | 0.585400113 | 0.999071534 | Farsb         | Farsb         | FARSB        | 45.12576157 | 39.84290984 | 44.83526675 | 30.94441952 | 44.99696238 | 68.39643183 | 44.58883721 | 21.41556024 | 17.59937874 | 28.75794438 |
| ENSMUSG00000051184  | -0.190960603 | 3.01952104  | 0.297199018 | 0.585643737 | 0.999071534 | Zfp524        | Zfp524        | ZNF524       | 7.368903522 | 10.43504782 | 8.415027543 | 9.019673851 | 8.829345815 | 8.367648575 | 4.141778783 | 8.980718811 | 5.656943167 | 8.888819173 |
| ENSMUSG00000030180  | 0.172375162  | 6.16516448  | 0.297041289 | 0.58574324  | 0.999071534 | Kdm5a         | Kdm5a         | KDMSA        | 48.49440318 | 59.70507472 | 89.26661217 | 91.02932379 | 58.33908494 | 55.66305356 | 35.20511965 | 86.76756021 | 94.8323667  | 79.99937255 |
| ENSMUSG00000032180  | 0.146201652  | 4.902893002 | 0.296692032 | 0.58596369  | 0.999071534 | Tmed1         | Tmed1         | TMED1        | 36.91469764 | 26.68051998 | 27.4666499  | 34.13599642 | 21.1250274  | 32.30639972 | 49.89549127 | 21.89913741 | 22.62777267 | 25.2285603  |
| ENSMUSG00000042286  | 0.151240705  | 7.587406773 | 0.296661645 | 0.585982878 | 0.999071534 | Stab1         | Stab1         | STAB1        | 211.4524411 | 221.5076059 | 129.3221433 | 200.0286132 | 182.9963673 | 353.7696293 | 205.7946333 | 136.7141733 | 117.1458648 | 202.7435079 |

|                     |              |              |             |             |             |               |               |          |             |              |             |             |             |             |             |             |             |             |
|---------------------|--------------|--------------|-------------|-------------|-------------|---------------|---------------|----------|-------------|--------------|-------------|-------------|-------------|-------------|-------------|-------------|-------------|-------------|
| ENSMUSG00000061360  | -0.152225487 | 6.050494907  | 0.296597799 | 0.586023198 | 0.999071534 | Phf5a         | Phf5a         | PHF5A    | 104.56825   | 48.2028061   | 75.53328722 | 75.41834982 | 57.42344908 | 93.28109107 | 88.3363756  | 33.02141224 | 42.42707375 | 53.59435089 |
| ENSMUSG00000026285  | 0.337361005  | 1.382365569  | 0.296441302 | 0.586122054 | 0.999071534 | Pdc1          | Pdc1          | PDCD1    | 3.859901845 | 3.379532531  | 0.403921322 | 1.873316877 | 1.896674286 | 5.74821076  | 1.359021163 | 3.45412262  | 2.435628308 | 0.784307574 |
| ENSMUSG00000028454  | 0.183177944  | 3.091607735  | 0.296248688 | 0.58624377  | 0.999071534 | Plgo          | Plgo          | PIGO     | 9.614664595 | 9.01208675   | 8.751628644 | 5.203657991 | 8.436930446 | 9.677367482 | 6.342098761 | 8.842553906 | 7.464022234 | 10.71887018 |
| ENSMUSG00000004270  | -0.12221213  | 4.912356382  | 0.296172202 | 0.586292118 | 0.999071534 | Lpcat3        | Lpcat3        | LPCAT3   | 29.26507399 | 33.49887509  | 36.48755943 | 27.19778577 | 36.03681144 | 30.77839432 | 28.47472913 | 33.71223677 | 23.41345922 | 22.02597104 |
| ENSMUSG000000085175 | 0.298817108  | 1.446869903  | 0.296124898 | 0.586322022 | 0.999071534 | Gm11423       | Gm11423       |          | 4.000261912 | 0.948640711  | 3.231370576 | 2.289609516 | 1.63506404  | 1.309718907 | 3.041618794 | 1.796143762 | 3.064177549 | 4.182973728 |
| ENSMUSG00000049327  | 0.126274135  | 7.153433034  | 0.296106076 | 0.586333922 | 0.999071534 | Setd8         | Kmt5a         | KMT5A    | 145.2024894 | 139.6280546  | 142.1129851 | 110.3175494 | 171.6163216 | 182.9968362 | 172.9839795 | 133.9508752 | 109.8389798 | 124.6395453 |
| ENSMUSG00000028030  | 0.13112718   | 4.734213598  | 0.295956229 | 0.586428678 | 0.999071534 | Tbck          | Tbck          | TBCK     | 22.66815083 | 23.77530781  | 28.40913298 | 23.10424148 | 33.48611154 | 27.43133489 | 21.03247038 | 33.36682451 | 22.78490998 | 28.30043163 |
| ENSMUSG00000028218  | 0.120900917  | 5.885269308  | 0.295945999 | 0.586435149 | 0.999071534 | Fam92a        | Fam92a        | FAM92A1  | 56.9160072  | 43.22244237  | 69.60910783 | 58.35035161 | 65.01014623 | 52.60704278 | 74.81087926 | 62.1051247  | 45.17697668 | 60.65311906 |
| ENSMUSG00000021103  | -0.14747664  | 5.061491316  | 0.295804096 | 0.586524912 | 0.999071534 | Mnat1         | Mnat1         | MNAT1    | 43.44144076 | 41.14729082  | 34.40063259 | 29.6955416  | 33.35530641 | 36.89041589 | 54.74913828 | 20.44840591 | 16.9708295  | 26.53573959 |
| ENSMUSG00000022462  | 0.15085282   | 8.428083169  | 0.295800881 | 0.586526946 | 0.999071534 | Slc38a2       | Slc38a2       | SLC38A2  | 236.0154528 | 302.4385165  | 387.7644692 | 359.0524014 | 405.038064  | 378.9453372 | 249.9951787 | 419.8140632 | 347.7448675 | 333.6575138 |
| ENSMUSG00000028578  | 0.171162405  | 3.867324572  | 0.295714584 | 0.586581549 | 0.999071534 | Caap1         | Caap1         | CAAP1    | 15.57996745 | 10.85007813  | 11.37711724 | 19.49637194 | 12.88430463 | 13.53376204 | 15.46695514 | 9.395213526 | 16.57798623 | 17.64692042 |
| ENSMUSG00000044949  | 0.263187382  | 2.55671963   | 0.295697553 | 0.586592326 | 0.999071534 | Ubt2          | Ubt2          | UBTD2    | 5.824942784 | 10.79078808  | 3.231370576 | 2.705902155 | 4.774386997 | 9.604605321 | 9.707294022 | 7.115492597 | 1.964216377 | 3.137230296 |
| ENSMUSG00000034664  | 0.212058854  | 3.663055578  | 0.295520431 | 0.586704433 | 0.999071534 | Itga2b        | Itga2b        | ITGA2B   | 11.43934547 | 11.26510844  | 12.2522801  | 11.03175494 | 14.38856355 | 6.330308052 | 5.306654065 | 18.65226215 | 12.96382809 | 19.47697142 |
| ENSMUSG00000021279  | -0.166711067 | 5.7252679    | 0.295517423 | 0.586706337 | 0.999071534 | Cdc42bpb      | Cdc42bpb      | CDCA2BPB | 67.1622921  | 92.07743896  | 45.17186785 | 32.67897218 | 54.93815174 | 106.6693288 | 44.00639957 | 46.42340801 | 24.43485174 | 32.48340536 |
| ENSMUSG00000023707  | -0.139203647 | 4.438634354  | 0.295430006 | 0.586761683 | 0.999071534 | Ogfod2        | Ogfod2        | OGFOD2   | 24.84373187 | 16.9569527   | 24.1679591  | 23.65929833 | 27.66528356 | 22.99284304 | 15.07866338 | 21.83005496 | 13.74951464 | 26.1435858  |
| ENSMUSG00000071661  | -0.241405992 | 1.96802926   | 0.295418314 | 0.586769087 | 0.999071534 | Zbtb3         | Zbtb3         | ZBTB3    | 5.052962415 | 3.616692709  | 2.962089695 | 4.648601139 | 4.970594681 | 2.983248622 | 3.17104938  | 4.559441858 | 1.414235792 | 4.705845444 |
| ENSMUSG00000018567  | -0.159733782 | 8.662651492  | 0.295160203 | 0.586932569 | 0.999071534 | Gabarap       | Gabarap       | GABARAP  | 362.3395132 | 531.47595891 | 389.9860364 | 416.3620214 | 521.6508313 | 268.4196139 | 320.2759874 | 540.4320251 | 251.1839903 | 449.277522  |
| ENSMUSG00000024121  | -0.146062095 | 8.757951602  | 0.295047979 | 0.587003678 | 0.999071534 | Atp6v0c       | Atp6v0c       | ATP6VOC  | 434.1336875 | 347.3803702  | 551.6218855 | 554.2936492 | 462.461513  | 380.9826777 | 352.82778   | 455.5296911 | 344.4449839 | 433.3952936 |
| ENSMUSG00000053801  | 0.178449086  | 5.236581733  | 0.295004204 | 0.587031421 | 0.999071534 | Grwd1         | Grwd1         | GRWD1    | 51.93322482 | 22.2930567   | 37.69932339 | 38.78459756 | 32.11265774 | 70.28824803 | 47.88931717 | 12.02034672 | 32.68456052 | 35.75135358 |
| ENSMUSG00000003644  | -0.13508113  | 4.745200996  | 0.294966687 | 0.5870552   | 0.999071534 | Rps6ka1       | Rps6ka1       | RPS6KA1  | 36.00235721 | 32.43165429  | 26.05292527 | 19.35760773 | 32.11265774 | 42.78415098 | 24.07408917 | 19.89574629 | 16.81369219 | 23.2024324  |
| ENSMUSG00000003458  | -0.12134035  | 6.163989818  | 0.294848024 | 0.587130421 | 0.999071534 | Ncstn         | Ncstn         | NCSTN    | 83.37387985 | 98.71792394  | 65.36793395 | 61.4725464  | 79.72572259 | 97.50129644 | 63.74456408 | 76.81968706 | 39.91827679 | 61.04527285 |
| ENSMUSG00000028268  | -0.167029383 | 5.930384445  | 0.294838096 | 0.587136716 | 0.999071534 | Gbp3          | Gbp3          | GBP7     | 62.31986979 | 74.764746    | 74.05224238 | 64.45597698 | 58.20827982 | 48.0230266  | 19.41458804 | 81.31004647 | 56.56943167 | 65.22824658 |
| ENSMUSG00000027942  | 0.125604243  | 6.592293312  | 0.294636852 | 0.587264334 | 0.999071534 | 4933434E20Rik | 4933434E20Rik | C1orf43  | 95.72556575 | 111.6431536  | 85.96792138 | 85.33999106 | 100.6545423 | 81.78466955 | 117.5876883 | 117.4401691 | 63.87631659 | 103.7900356 |
| ENSMUSG00000061524  | 0.220197574  | 2.534595264  | 0.294554088 | 0.587316835 | 0.999071534 | Zic2          | Zic2          | ZIC2     | 4.702062247 | 6.344034752  | 3.433331237 | 3.469105327 | 9.41796887  | 7.057929668 | 5.371369359 | 8.151729382 | 3.771295445 | 5.359435089 |
| ENSMUSG00000033396  | -0.137759275 | 4.440773782  | 0.294434125 | 0.58739295  | 0.999071534 | Spg11         | Spg11         | SPG11    | 22.87869093 | 32.72810451  | 20.93658853 | 17.41490874 | 23.87193498 | 29.25038893 | 15.72581632 | 16.78703593 | 17.99222202 | 20.58807382 |
| ENSMUSG00000022185  | 0.153396717  | 7.052201325  | 0.294413372 | 0.58740612  | 0.999071534 | Acin1         | Acin1         | ACIN1    | 133.903504  | 92.37388919  | 166.1463038 | 125.4428486 | 133.3558231 | 174.774712  | 64.06814054 | 136.5069259 | 127.0455153 | 172.2208715 |
| ENSMUSG00000013787  | -0.133679936 | 7.130379644  | 0.294310118 | 0.587471652 | 0.999071534 | Ehmt2         | Ehmt2         | EHMT2    | 142.254928  | 164.174133   | 153.2881417 | 138.4173026 | 162.9177809 | 163.7876256 | 81.47655449 | 133.1909682 | 105.6748411 | 164.3124368 |
| ENSMUSG00000026058  | 0.546108812  | -0.109526946 | 0.294139563 | 0.587579931 | 0.999071534 | Khdrbs2       | Khdrbs2       | KHDRBS2  | 0.350900168 | 0.059290044  | 2.490848153 | 0.069382107 | 0.457817931 | 0.509335131 | 1.294305087 | 0.138164905 | 2.042785033 | 0.326794823 |
| ENSMUSG00000050567  | -0.128434021 | 4.980195078  | 0.294061714 | 0.587629368 | 0.999071534 | Maml1         | Maml1         | MAML1    | 30.66867466 | 31.66088371  | 37.02612119 | 35.73178487 | 34.99037045 | 39.58261587 | 17.66727512 | 32.88324734 | 26.79191139 | 28.62722645 |
| ENSMUSG00000045576  | 0.120798808  | 4.968959883  | 0.293820418 | 0.587782654 | 0.999071534 | St7l          | St7l          | ST7L     | 30.45813456 | 32.01662398  | 26.7612748  | 35.24611013 | 30.28138602 | 30.12353487 | 38.76446079 | 30.39627905 | 26.2419308  | 30.58799539 |
| ENSMUSG00000026198  | 0.218789929  | 2.742113874  | 0.293622819 | 0.587908241 | 0.999071534 | Abcb6         | Abcb6         | ABCB6    | 6.877643287 | 7.233385418  | 6.732022034 | 2.914048475 | 7.979112515 | 8.804221544 | 9.254286968 | 7.322739954 | 2.357059653 | 7.320204025 |
| ENSMUSG00000030726  | 0.118326773  | 4.939104244  | 0.293615787 | 0.587912712 | 0.999071534 | Pold3         | Pold3         | POLD3    | 31.65119513 | 24.48678834  | 34.87187414 | 28.65481    | 32.43967055 | 39.50985371 | 34.55796672 | 26.59674417 | 26.9490487  | 26.79717545 |
| ENSMUSG00000024949  | -0.1372748   | 7.086248398  | 0.293556335 | 0.587950509 | 0.999071534 | Sf1           | Sf1           | SF1      | 125.9731602 | 154.6877259  | 166.9541464 | 119.4066054 | 173.055178  | 210.5009333 | 86.65377797 | 132.4310612 | 82.65422516 | 130.4564932 |
| ENSMUSG00000026768  | -0.506492781 | -0.111764878 | 0.293439037 | 0.588025096 | 0.999071534 | Itga8         | Itga8         | ITGA8    | 1.122880537 | 0.889350666  | 0.336601102 | 2.150845303 | 0.196207685 | 2.328389169 | 0.19414588  | 0.414494714 | 0           | 0.588230681 |
| ENSMUSG00000002052  | -0.135628158 | 5.727347965  | 0.293388622 | 0.58805716  | 0.999071534 | Supt6         | Supt6         | SUPT6H   | 56.77564714 | 75.77267675  | 40.32481198 | 48.42871037 | 66.97222307 | 82.73057765 | 28.53944442 | 48.01230441 | 37.87009176 | 51.96037678 |
| ENSMUSG00000027692  | -0.384894648 | 0.236598102  | 0.293188001 | 0.58818479  | 0.999071534 | Tnik          | Tnik          | TNIK     | 1.403600671 | 1.422961066  | 1.88496617  | 0.971349492 | 0.457817931 | 1.091432423 | 0.129430587 | 0.759906976 | 1.099961171 | 1.241820326 |
| ENSMUSG00000022180  | -0.176405292 | 3.745764764  | 0.292860155 | 0.588393479 | 0.999071534 | Slc7a8        | Slc7a8        | SLC7A8   | 10.31646493 | 21.52228612  | 13.53136429 | 12.28063286 | 15.63121222 | 20.66445387 | 12.68419752 | 14.85272726 | 5.892649132 | 8.365947457 |
| ENSMUSG00000023495  | -0.127123206 | 5.664595275  | 0.292738511 | 0.588470949 | 0.999071534 | Pcbp4         | Pcbp4         | PCBP4    | 45.4064817  | 47.07629526  | 56.54898509 | 62.79080643 | 61.4784079  | 54.6443833  | 28.15115266 | 52.57174627 | 43.44846627 | 53.79042779 |
| ENSMUSG00000081254  | -0.407815662 | 2.678795042  | 0.29265692  | 0.588522923 | 0.999071534 | Gm12112       | Gm12112       |          | 13.89564664 | 8.893506661  | 3.164050356 | 4.093544286 | 7.39048946  | 10.11394045 | 13.97850339 | 2.832380548 | 0           | 1.045743432 |

|                     |              |              |             |             |             |               |               |          |             |             |             |             |             |             |             |             |             |             |
|---------------------|--------------|--------------|-------------|-------------|-------------|---------------|---------------|----------|-------------|-------------|-------------|-------------|-------------|-------------|-------------|-------------|-------------|-------------|
| ENSMUSG00000050592  | -0.339530974 | 1.860021633  | 0.292633425 | 0.588537891 | 0.999071534 | Fam78a        | Fam78a        | FAM78A   | 4.421342113 | 5.751134307 | 3.231370576 | 2.01208109  | 4.970594681 | 8.367648575 | 3.559341141 | 2.763298096 | 0.078568655 | 1.568615148 |
| ENSMUSG00000055202  | 0.438278683  | 0.31545426   | 0.292326232 | 0.588733668 | 0.999071534 | Zfp811        | Zfp811        |          | 0.140360067 | 0.474320355 | 2.490848153 | 0.763203172 | 1.046440986 | 0.363810808 | 0.388291761 | 0.967154334 | 1.649941757 | 2.548999616 |
| ENSMUSG00000078619  | -0.119555708 | 5.931082921  | 0.292282138 | 0.58876178  | 0.999071534 | Smarcd2       | Smarcd2       | SMARCD2  | 68.4255327  | 57.03702272 | 79.23589934 | 54.60371785 | 70.5039614  | 84.9134425  | 52.54881831 | 38.54800844 | 44.6269961  | 66.53542587 |
| ENSMUSG00000029148  | -0.128118495 | 6.386150739  | 0.292114375 | 0.588868765 | 0.999071534 | Nrbp1         | Nrbp1         | NRBP1    | 96.07646592 | 107.5521406 | 75.39864678 | 72.71244766 | 102.8782294 | 105.9417072 | 102.767886  | 83.24435513 | 40.61999469 | 62.54852903 |
| ENSMUSG00000028959  | 0.132262665  | 5.956772669  | 0.291927142 | 0.588988211 | 0.999071534 | Fastk         | Fastk         | FASTK    | 58.03888774 | 52.70884948 | 72.36923687 | 60.91748955 | 62.59025145 | 57.33658328 | 38.31145374 | 74.81629594 | 60.57643308 | 76.99286019 |
| ENSMUSG00000066043  | -0.134462193 | 6.002276207  | 0.291900688 | 0.589005091 | 0.999071534 | Phactr4       | Phactr4       | PHACTR4  | 62.17950972 | 78.38143871 | 64.76205197 | 56.54641684 | 86.8546018  | 71.08863181 | 37.98787727 | 90.29076528 | 40.30572007 | 56.86229912 |
| ENSMUSG00000019997  | -0.224037631 | 7.977593039  | 0.291764304 | 0.589092135 | 0.999071534 | Ctgf          | Ctgf          | CTGF     | 336.6536209 | 282.3391915 | 456.3637737 | 244.6413077 | 85.61195313 | 496.0924173 | 285.0061525 | 90.42893018 | 115.5744916 | 204.9657127 |
| ENSMUSG00000028793  | -0.128746423 | 6.544747852  | 0.2917595   | 0.589095202 | 0.999071534 | Rnf19b        | Rnf19b        | RNF19B   | 113.7618344 | 131.4460285 | 98.75876324 | 64.80288752 | 99.804309   | 122.1676692 | 102.1207331 | 77.7868414  | 48.00544826 | 91.43719134 |
| ENSMUSG00000022836  | -0.223321865 | 2.538467984  | 0.291635099 | 0.589174621 | 0.999071534 | Mylk          | Mylk          | MYLK     | 5.052962415 | 7.055515284 | 8.145746661 | 5.342422204 | 6.14784079  | 10.47775126 | 5.241938772 | 4.421276953 | 1.649941757 | 4.967281302 |
| ENSMUSG000000086119 | -0.34801295  | 0.138181788  | 0.291602859 | 0.589195207 | 0.999071534 | Gm2415        | Gm2415        |          | 1.052700503 | 0.711480533 | 1.615685288 | 1.110113705 | 1.111843547 | 1.673529715 | 0.906014109 | 0.690824524 | 0.471411931 | 0.522871716 |
| ENSMUSG00000009566  | 0.137691231  | 4.587784665  | 0.291456294 | 0.589288811 | 0.999071534 | Fpgs          | Fpgs          | FPGS     | 27.79129328 | 15.65257172 | 28.34181276 | 20.1208109  | 26.61884257 | 37.10870238 | 25.49782563 | 20.65565327 | 15.94943698 | 24.83640651 |
| ENSMUSG00000033016  | -0.167233786 | 4.246298598  | 0.291320407 | 0.589375622 | 0.999071534 | Nfatc1        | Nfatc1        | NFATC1   | 29.05453389 | 17.54985314 | 15.95489222 | 18.38625824 | 22.95629912 | 26.92199976 | 26.08026327 | 14.43823255 | 6.756904338 | 14.96720287 |
| ENSMUSG00000000276  | 0.205723328  | 2.782958064  | 0.291307383 | 0.589383944 | 0.999071534 | Dgke          | Dgke          | DGKE     | 5.684582717 | 5.098943819 | 10.70391503 | 4.995511672 | 6.082438228 | 8.58593506  | 6.665675228 | 4.283112048 | 6.678335683 | 8.758101244 |
| ENSMUSG000000017765 | -0.119724888 | 6.275572523  | 0.291242258 | 0.58942556  | 0.999071534 | Slc12a4       | Slc12a4       | SLC12A4  | 100.9188882 | 89.88370732 | 70.08034938 | 84.7155521  | 72.53144081 | 116.9287936 | 71.96340635 | 65.21383506 | 45.01983937 | 69.73801513 |
| ENSMUSG000000029173 | 0.167897022  | 3.434507673  | 0.29119811  | 0.589453774 | 0.999071534 | Sepsecs       | Sepsecs       | SEPECS   | 8.351423991 | 12.21374915 | 9.89607239  | 10.89299073 | 10.79142266 | 13.46099988 | 14.43151045 | 9.602460883 | 6.128355098 | 11.9606905  |
| ENSMUSG000000026203 | 0.13314664   | 4.971113625  | 0.290951601 | 0.589611366 | 0.999071534 | Dnajb2        | Dnajb2        | DNAJB2   | 32.07227533 | 36.048347   | 25.17767241 | 21.09216039 | 41.26901637 | 34.92583753 | 22.06791508 | 35.57746298 | 26.16336215 | 38.88858388 |
| ENSMUSG000000031774 | -0.106162789 | 5.731816659  | 0.290888127 | 0.589651959 | 0.999071534 | Fam192a       | Fam192a       | FAM192A  | 57.89852767 | 49.15144681 | 62.94440602 | 58.07282318 | 56.90022859 | 59.01011299 | 52.16052654 | 46.35432556 | 41.56281855 | 48.30027477 |
| ENSMUSG000000048445 | 0.274086589  | 1.576206666  | 0.290846947 | 0.589678297 | 0.999071534 | Ccdc57        | Ccdc57        | CCDC57   | 1.824680872 | 2.96450222  | 2.827449254 | 1.665170557 | 4.185763942 | 2.692199976 | 1.812028217 | 5.733843549 | 2.592765618 | 2.0261279   |
| ENSMUSG000000029141 | 0.121635029  | 4.739258156  | 0.290613311 | 0.589827774 | 0.999071534 | Slc4a1ap      | Slc4a1ap      | SLC4A1AP | 26.87895285 | 30.59366291 | 27.4666499  | 20.25957511 | 27.40367331 | 39.21880506 | 28.53944442 | 22.72812684 | 20.11357571 | 25.62071409 |
| ENSMUSG000000083380 | 0.151236393  | 5.597896295  | 0.290608964 | 0.589830556 | 0.999071534 | Gm3244        | Gm3244        |          | 50.52962415 | 45.65333419 | 40.99801419 | 62.16636747 | 36.88704474 | 34.70755105 | 78.24078982 | 60.99980546 | 27.10618601 | 43.98658311 |
| ENSMUSG000000075389 | -0.35698641  | 0.778202676  | 0.290491112 | 0.589905986 | 0.999071534 | 2810410L24Rik | 2810410L24Rik |          | 2.596661241 | 0.770770577 | 1.346404407 | 2.428373729 | 2.027479409 | 2.546675653 | 0.906014109 | 1.312566595 | 0.078568655 | 2.222204793 |
| ENSMUSG000000057137 | -0.173643202 | 5.012382257  | 0.290436302 | 0.589941073 | 0.999071534 | Tmem140       | Tmem140       | TMEM140  | 30.73885469 | 39.36858949 | 29.55357673 | 38.71521545 | 38.19509597 | 16.66253499 | 15.9199622  | 53.46981815 | 24.90626367 | 30.91479021 |
| ENSMUSG000000025017 | -0.457197634 | 1.995538499  | 0.290160943 | 0.590117413 | 0.999071534 | Plk3ap1       | Plk3ap1       | PIK3AP1  | 10.8779052  | 9.486407105 | 0.336601102 | 1.318260024 | 1.373453794 | 12.2968053  | 3.688771728 | 0.759906976 | 0.707117896 | 0.326794823 |
| ENSMUSG000000059005 | 0.159012012  | 9.051301531  | 0.29011338  | 0.590147883 | 0.999071534 | Hnrnpa3       | Hnrnpa3       | HNRNPA3  | 361.2166326 | 336.471002  | 724.2982507 | 609.7993345 | 555.9217736 | 553.3562384 | 480.6404847 | 451.3847439 | 571.5869658 | 608.4919595 |
| ENSMUSG000000025420 | -0.252520594 | 1.762900433  | 0.290018254 | 0.590208833 | 0.999071534 | Katnal2       | Katnal2       | KATNAL2  | 4.491522147 | 2.312311732 | 4.577774983 | 2.775284262 | 4.316569065 | 1.964578361 | 2.329750565 | 4.006782239 | 3.221314859 | 2.418281687 |
| ENSMUSG000000001082 | 0.123790302  | 5.45981825   | 0.289998945 | 0.590221206 | 0.999071534 | Mfsd10        | Mfsd10        | MFSD10   | 40.42369932 | 40.37652024 | 46.6529127  | 43.71072713 | 46.69742898 | 42.9296753  | 34.23439025 | 57.20027058 | 30.56320683 | 55.94727362 |
| ENSMUSG000000029062 | 0.139101747  | 6.339665264  | 0.289969874 | 0.590239836 | 0.999071534 | Cdk11b        | Cdk11b        | CDK11B   | 65.8990515  | 71.50379355 | 111.213004  | 74.03070769 | 76.32478938 | 92.04413433 | 46.85387248 | 75.36895556 | 87.52548178 | 102.8096512 |
| ENSMUSG000000040118 | 0.159303556  | 3.76913287   | 0.289844389 | 0.590320267 | 0.999071534 | Cacna2d1      | Cacna2d1      | CACNA2D1 | 10.2462849  | 16.4233423  | 9.89607239  | 14.8477708  | 14.6501738  | 14.47967014 | 15.79053161 | 11.4676871  | 14.37806388 | 11.9606905  |
| ENSMUSG000000069236 | -0.382091951 | 0.575767055  | 0.289783574 | 0.590359255 | 0.999071534 | Gm7251        | Gm7251        |          | 0.631620302 | 2.845922132 | 0.471241542 | 2.150845303 | 1.831271725 | 0.873145938 | 0.19414588  | 1.312566595 | 1.649941757 | 1.437897219 |
| ENSMUSG000000010651 | -0.273393353 | 1.663726087  | 0.289728738 | 0.590394414 | 0.999071534 | Acaa1b        | Acaa1b        | ACAA1    | 2.737021308 | 1.185800888 | 5.587578288 | 3.81601586  | 3.858751134 | 2.619437815 | 2.394465859 | 1.72706131  | 3.378452169 | 2.875794438 |
| ENSMUSG000000027257 | -0.134137345 | 4.581882843  | 0.289645112 | 0.590448041 | 0.999071534 | Pacsin3       | Pacsin3       | PACSN3   | 31.86173523 | 20.87009563 | 30.36141937 | 18.24749402 | 28.64632198 | 24.37532411 | 19.34987275 | 22.17546722 | 17.04939816 | 26.99325234 |
| ENSMUSG000000030451 | -0.134364797 | 5.118612662  | 0.289630682 | 0.590457295 | 0.999071534 | Herc2         | Herc2         | HERC2    | 35.23037684 | 46.36481473 | 44.09474432 | 30.38936267 | 32.17806031 | 53.62571304 | 19.99702569 | 25.90591965 | 29.2275397  | 33.46378983 |
| ENSMUSG000000028393 | 0.124373203  | 5.860322105  | 0.289426647 | 0.590588183 | 0.999071534 | Alad          | Alad          | ALAD     | 76.28569646 | 40.25794015 | 63.07904646 | 57.03209158 | 51.21020573 | 77.49170202 | 62.32082762 | 38.40984353 | 52.3267243  | 63.59427246 |
| ENSMUSG000000028840 | 0.140882361  | 4.740326766  | 0.289071333 | 0.590816257 | 0.999071534 | Zfp593        | Zfp593        | ZNF593   | 33.2653359  | 20.63293545 | 26.99540836 | 27.40593209 | 22.89089656 | 27.06752409 | 39.54104432 | 17.61602536 | 24.51342039 | 25.35927823 |
| ENSMUSG000000057193 | -0.125358234 | 6.078246447  | 0.289065961 | 0.590819707 | 0.999071534 | Slc44a2       | Slc44a2       | SLC44A2  | 75.86461626 | 81.93884137 | 75.8025681  | 62.79080643 | 69.45752041 | 67.30499941 | 47.04801836 | 91.60333187 | 40.93426931 | 65.88183622 |
| ENSMUSG000000020798 | 0.401094028  | -0.015088212 | 0.28864843  | 0.591087953 | 0.999071534 | Spns3         | Spns3         | SPNS3    | 0.350900168 | 0.237160178 | 1.279084186 | 0.763203172 | 1.177246109 | 1.673529715 | 0.582437641 | 1.174401691 | 0.235705965 | 1.241820326 |
| ENSMUSG000000040957 | 0.279903545  | 1.557950368  | 0.288625401 | 0.591102755 | 0.999071534 | Cables1       | Cables1       | CABL E51 | 2.386122114 | 3.675982753 | 1.750325729 | 3.399723221 | 1.896674286 | 4.656778337 | 2.200319978 | 0.898071881 | 2.749902928 | 4.64048648  |
| ENSMUSG00000018848  | 0.119196461  | 6.947150593  | 0.288562209 | 0.591143377 | 0.999071534 | Rars          | Rars          | RARS     | 114.5338147 | 122.7303919 | 136.256126  | 100.8815829 | 140.5501049 | 153.9647338 | 141.1440551 | 100.3768033 | 103.0035068 | 125.4892118 |
| ENSMUSG000000018921 | 0.146619088  | 5.194649761  | 0.288550518 | 0.591150893 | 0.999071534 | Pelp1         | Pelp1         | PELP1    | 38.10775821 | 27.15484034 | 43.0176208  | 40.03347548 | 30.87000907 | 58.79182651 | 19.99702569 | 26.25133191 | 37.24154252 | 44.83624965 |

|                     |              |              |             |             |             |               |           |         |             |             |             |             |             |             |             |             |             |             |             |
|---------------------|--------------|--------------|-------------|-------------|-------------|---------------|-----------|---------|-------------|-------------|-------------|-------------|-------------|-------------|-------------|-------------|-------------|-------------|-------------|
| ENSMUSG00000063830  | 0.432768745  | -0.408994706 | 0.288540711 | 0.591157198 | 0.999071534 | Gm6065        | Gm6065    |         |             | 0.98252047  | 0.474320355 | 0.605881983 | 0.20814632  | 0.523220493 | 0.291048646 | 1.035444696 | 0.27632981  | 1.178529826 | 0.522871716 |
| ENSMUSG00000041911  | 0.257854836  | 1.644675144  | 0.288351807 | 0.591278672 | 0.999071534 | Dlx1          | Dlx1      | DLX1    |             | 2.596661241 | 2.134441599 | 2.154247051 | 4.301690606 | 2.87771271  | 2.037340523 | 3.300479967 | 4.214029596 | 3.299883514 | 2.483640651 |
| ENSMUSG00000027331  | 0.238741808  | 5.111227749  | 0.288333243 | 0.591290613 | 0.999071534 | Knstrn        | Knstrn    | KNSTRN  |             | 67.5833723  | 27.33271047 | 20.06142566 | 22.2022741  | 28.18850405 | 63.01203188 | 81.86484625 | 13.60924312 | 12.17814154 | 19.28089453 |
| ENSMUSG000000084186 | 0.377772162  | -0.11827484  | 0.288245764 | 0.591346885 | 0.999071534 | RpB6-ps10     | RpB6-ps10 |         |             | 0.491260235 | 1.126510844 | 1.077123525 | 0.346910533 | 0.523220493 | 0.509335131 | 0.906014109 | 0.759906976 | 0.864255206 | 1.176461361 |
| ENSMUSG00000056076  | -0.160613509 | 7.741795051  | 0.287884839 | 0.591579174 | 0.999071534 | Elf3b         | Elf3b     | EIF3B   |             | 281.4921145 | 240.1839699 | 234.5436477 | 191.425232  | 228.1241348 | 424.8582611 | 199.6466804 | 106.8705539 | 126.652672  | 168.8875643 |
| ENSMUSG00000021595  | 0.132898349  | 7.089477546  | 0.287758398 | 0.591660595 | 0.999071534 | Nsun2         | Nsun2     | NSUN2   |             | 143.5883486 | 130.1416475 | 145.0077546 | 121.6268328 | 134.1406538 | 218.3592467 | 176.8668971 | 92.4323213  | 91.37534588 | 128.3650063 |
| ENSMUSG00000032267  | 0.158729997  | 3.696134255  | 0.28774243  | 0.59167088  | 0.999071534 | Usp28         | Usp28     | USP28   |             | 10.73754513 | 12.92522968 | 15.887572   | 10.6154623  | 12.81890207 | 15.06176744 | 14.30207986 | 17.82327272 | 9.035395336 | 9.542408818 |
| ENSMUSG00000032030  | 0.130840653  | 4.92517885   | 0.287531028 | 0.591807067 | 0.999071534 | CuI5          | CuI5      | CUL5    |             | 32.28281543 | 36.34479722 | 27.19736902 | 28.09975315 | 26.09562208 | 43.43901043 | 44.07111486 | 22.86629174 | 22.31349805 | 22.94099654 |
| ENSMUSG00000026126  | 0.158623734  | 4.295749813  | 0.287471065 | 0.591845708 | 0.999071534 | Ptpn18        | Ptpn18    | PTPN18  |             | 29.40543405 | 11.20581839 | 17.57057751 | 20.39833933 | 17.13547114 | 24.30256195 | 26.66270091 | 12.84933615 | 14.06378926 | 22.81027861 |
| ENSMUSG00000057778  | 0.186426949  | 3.013840838  | 0.28744865  | 0.591860153 | 0.999071534 | Cyb5d2        | Cyb5d2    | CYB5D2  |             | 10.94808523 | 8.063446039 | 6.866662475 | 5.273040098 | 7.652099707 | 7.421740475 | 10.41916225 | 7.875399573 | 7.621159544 | 7.058768167 |
| ENSMUSG00000022641  | 0.149261979  | 5.431112385  | 0.287427192 | 0.591873983 | 0.999071534 | Bbx           | Bbx       | BBX     |             | 27.65093322 | 49.44789704 | 42.41173882 | 45.79219032 | 45.84719568 | 39.58261587 | 25.30367975 | 56.23311625 | 51.85531236 | 39.4114556  |
| ENSMUSG00000000295  | 0.155682144  | 6.068597183  | 0.287290536 | 0.591962073 | 0.999071534 | Hddc2         | Hddc2     | HDDC2   |             | 86.32144126 | 35.27757642 | 75.53328722 | 78.33239829 | 52.12584159 | 60.17430758 | 98.88496844 | 46.07799575 | 71.26177017 | 59.01914495 |
| ENSMUSG00000036894  | 0.111548936  | 6.066887414  | 0.287230283 | 0.592000921 | 0.999071534 | Rap2b         | Rap2b     | RAP2B   |             | 58.10906777 | 55.96980192 | 69.54178761 | 67.43940757 | 82.73424042 | 89.642983   | 67.62748169 | 61.13797037 | 53.50525412 | 67.31973344 |
| ENSMUSG00000040710  | -0.168946219 | 4.059792273  | 0.287158291 | 0.592047345 | 0.999071534 | St8sia4       | St8sia4   | ST8SIA4 |             | 22.24707063 | 23.41956754 | 15.07972936 | 16.23541293 | 14.06155074 | 19.57302145 | 25.69197151 | 9.602460883 | 11.62816095 | 9.738485711 |
| ENSMUSG00000003435  | -0.122940541 | 6.380510674  | 0.287151076 | 0.592051999 | 0.999071534 | Supt5         | Supt5     | SUPT5H  |             | 94.95358538 | 116.9199676 | 77.82217472 | 69.52087076 | 92.8062349  | 122.8952908 | 54.49027711 | 76.12886254 | 58.92649132 | 80.32616738 |
| ENSMUSG00000029162  | -0.222104327 | 2.221575384  | 0.287137549 | 0.592060722 | 0.999071534 | Khk           | Khk       | KHK     |             | 9.263764428 | 4.03172302  | 4.443134543 | 3.260959008 | 4.51277675  | 4.729540499 | 4.530070544 | 4.283112048 | 3.142746204 | 3.594743048 |
| ENSMUSG00000026413  | -0.212237518 | 4.671430791  | 0.287024511 | 0.592133634 | 0.999071534 | Pkp1          | Pkp1      | PKP1    |             | 18.87842902 | 49.15144681 | 42.74833992 | 10.5460802  | 20.79801459 | 19.79130793 | 10.67802342 | 40.27506975 | 17.83508471 | 23.39850929 |
| ENSMUSG00000078427  | 0.140734715  | 7.231448859  | 0.286863684 | 0.592237401 | 0.999071534 | Sarnp         | Sarnp     | SARNP   |             | 169.1338808 | 114.0740054 | 153.5574226 | 174.8429085 | 126.9463721 | 126.7516854 | 209.4186897 | 138.0958223 | 131.1310854 | 146.9923112 |
| ENSMUSG00000039048  | 0.172239979  | 3.206129193  | 0.286724602 | 0.592327168 | 0.999071534 | Foxred1       | Foxred1   | FOXRED1 |             | 8.491784059 | 9.96072746  | 7.001302916 | 9.019673851 | 9.941189363 | 13.53376204 | 11.51932224 | 7.184575049 | 6.678335683 | 8.56202435  |
| ENSMUSG00000029651  | -0.45577811  | -0.378732522 | 0.286670152 | 0.59236232  | 0.999071534 | Mtus2         | Mtus2     | MTUS2   |             | 1.122880537 | 1.007930755 | 0.673202203 | 0           | 1.046440986 | 0.291048646 | 0.517722348 | 0.621742072 | 0.31427462  | 0.784307574 |
| ENSMUSG00000000817  | -0.500506298 | -0.169524305 | 0.286654089 | 0.592372691 | 0.999071534 | Fasl          | Fasl      | FASLG   |             | 1.824680872 | 1.185800888 | 1.279084186 | 0.20814632  | 0.130805123 | 0.873145938 | 0           | 0.27632981  | 0.628549241 | 1.241820326 |
| ENSMUSG00000038717  | 0.191856531  | 7.379366347  | 0.28664706  | 0.592377228 | 0.999071534 | Atp5l         | Atp5l     | ATP5L   |             | 168.8531607 | 81.70168119 | 180.2162299 | 255.3261521 | 110.5957317 | 101.2849288 | 163.0825396 | 131.1184946 | 228.713355  | 195.4233039 |
| ENSMUSG00000040084  | 0.144928393  | 5.056254125  | 0.286626326 | 0.592390616 | 0.999071534 | Bub1b         | Bub1b     | BUB1B   |             | 33.475876   | 26.68051998 | 34.66991348 | 26.78149313 | 42.38085991 | 68.76024264 | 37.08186316 | 19.68849893 | 23.33489056 | 26.73181648 |
| ENSMUSG000000042104 | 0.301588459  | 0.812453853  | 0.286598906 | 0.592408321 | 0.999071534 | Uggt2         | Uggt2     | UGGT2   |             | 1.052700503 | 1.067220799 | 2.154247051 | 1.80393477  | 1.438856355 | 1.164194584 | 1.747312924 | 1.105319238 | 1.571373102 | 2.941153403 |
| ENSMUSG00000027219  | -0.278828727 | 2.515475101  | 0.286586082 | 0.592416601 | 0.999071534 | Slc28a2       | Slc28a2   | SLC28A2 |             | 12.49204597 | 5.098943819 | 2.625488593 | 6.175007483 | 5.493815174 | 10.69603774 | 7.830550511 | 3.592287524 | 1.021392516 | 2.941153403 |
| ENSMUSG00000020868  | 0.119523879  | 5.399455443  | 0.286450141 | 0.592504396 | 0.999071534 | Xylt2         | Xylt2     | XYLT2   |             | 44.07306106 | 48.79570655 | 37.29540207 | 32.74835429 | 47.28605203 | 42.9296753  | 35.20511965 | 38.68617334 | 36.45585597 | 57.38517084 |
| ENSMUSG00000051007  | -0.128678847 | 4.506101133  | 0.286208613 | 0.592660448 | 0.999071534 | Pddc1         | Pddc1     | PDDC1   |             | 29.40543405 | 23.41956754 | 23.22547602 | 19.21884351 | 27.73068612 | 24.30256195 | 17.02012219 | 19.75758138 | 16.73512354 | 26.79717545 |
| ENSMUSG00000048481  | -0.209461666 | 2.5407538    | 0.286196609 | 0.592668205 | 0.999071534 | Mypop         | Mypop     | MYPOP   |             | 8.491784059 | 5.217523908 | 5.452937848 | 6.660682229 | 5.820827982 | 6.548594537 | 2.523896446 | 5.457513739 | 4.478413341 | 6.53589645  |
| ENSMUSG00000039210  | 0.182636848  | 3.639188756  | 0.285890332 | 0.592866219 | 0.999071534 | Gpatch2       | Gpatch2   | GPATCH2 |             | 7.579443623 | 11.14652835 | 18.10913927 | 8.395234892 | 14.84638148 | 14.1886215  | 7.312828163 | 13.88557293 | 14.14235792 | 12.87571601 |
| ENSMUSG00000063714  | -0.24853923  | 2.635243814  | 0.285886127 | 0.592868939 | 0.999071534 | 1700011110Rlk | Sp3os     |         | 7.579443623 | 4.209593153 | 10.9058757  | 6.175007483 | 5.363010051 | 1.746291877 | 3.882917609 | 6.148338263 | 6.206923753 | 7.646998847 |             |
| ENSMUSG00000049600  | -0.196383058 | 3.229581396  | 0.285873793 | 0.592876916 | 0.999071534 | Zbtb45        | Zbtb45    | ZBTB45  |             | 10.2462849  | 6.818355107 | 12.38692054 | 12.41939707 | 9.156358623 | 13.2427134  | 7.636404631 | 7.391822406 | 3.142746204 | 11.82997258 |
| ENSMUSG00000043681  | 0.901773895  | -0.417617882 | 0.28581979  | 0.592911845 | 0.999071534 | Fam25c        | Fam25c    | FAM25G  |             | 0           | 0           | 2.154247051 | 0           | 0           | 3.856394561 | 0           | 0.138164905 | 0           | 0.522871716 |
| ENSMUSG00000040722  | -0.225361945 | 3.008469773  | 0.28572925  | 0.592970416 | 0.999071534 | Scamp5        | Scamp5    | SCAMP5  |             | 11.64988557 | 8.656346483 | 7.674505119 | 8.672763319 | 7.652099707 | 16.73529715 | 9.319002261 | 2.625133191 | 4.00700141  | 4.771204409 |
| ENSMUSG00000026994  | -0.335392692 | 0.700743258  | 0.285724221 | 0.59297367  | 0.999071534 | Galnt3        | Galnt3    | GALNT3  |             | 2.105401006 | 1.126510844 | 2.01960661  | 2.22022741  | 1.111843547 | 3.419821592 | 0.388291761 | 1.381649048 | 0.785686551 | 0.784307574 |
| ENSMUSG00000042419  | -0.144338343 | 3.984991966  | 0.285699643 | 0.592989572 | 0.999071534 | Nfkbil1       | Nfkbil1   | NFKBIL1 |             | 15.93086761 | 16.4233423  | 19.25358302 | 13.87642131 | 20.34019666 | 22.04693494 | 12.74891282 | 15.68171669 | 8.956826681 | 14.37897219 |
| ENSMUSG00000036214  | -0.21437624  | 2.121888898  | 0.28561423  | 0.593044841 | 0.999071534 | Znrd1as       | Znrd1as   |         | 3.859901845 | 3.260952442 | 5.520258068 | 5.61995063  | 5.166802366 | 4.220205368 | 4.335924663 | 3.799534882 | 3.064177549 | 3.464025119 |             |
| ENSMUSG00000039474  | -0.201341516 | 4.393555836  | 0.285550252 | 0.593086247 | 0.999071534 | Wfs1          | Wfs1      | WFS1    |             | 22.8085109  | 33.67674522 | 18.58038081 | 10.68484441 | 31.39322957 | 18.48158903 | 12.74891282 | 40.13690484 | 8.799689371 | 14.11753633 |
| ENSMUSG00000075297  | 0.342615639  | 1.279123387  | 0.285494575 | 0.593122285 | 0.999071534 | H60b          | H60b      |         | 2.877381375 | 2.193731643 | 0.740522424 | 1.665170557 | 3.073920395 | 3.710870238 | 6.342098761 | 0.621742072 | 1.335667137 | 0.784307574 |             |
| ENSMUSG00000047215  | 0.210804021  | 8.980595255  | 0.28521991  | 0.593300136 | 0.999071534 | Rpl9          | Rpl9      |         | 731.1355894 | 702.8241864 | 273.5893755 | 358.2198161 | 379.4002598 | 460.8027689 | 1224.413353 | 364.4099364 | 268.7048004 | 330.2588476 |             |

|                     |              |              |             |             |             |               |               |          |             |             |             |             |             |             |             |             |             |             |
|---------------------|--------------|--------------|-------------|-------------|-------------|---------------|---------------|----------|-------------|-------------|-------------|-------------|-------------|-------------|-------------|-------------|-------------|-------------|
| ENSMUSG00000040359  | -0.147616682 | 4.292161827  | 0.285111006 | 0.593370683 | 0.999071534 | Ufl1          | Ufl1          | UFL1     | 15.93086761 | 25.43542905 | 26.18756571 | 13.59889288 | 25.50699902 | 21.61036197 | 18.05556688 | 23.69528117 | 11.15674902 | 15.68615148 |
| ENSMUSG000000096810 | -0.53228303  | -0.646031298 | 0.285066381 | 0.593399596 | 0.999071534 | Gm10481       | Gm10481       |          | 0.280720134 | 1.600831199 | 0.538561763 | 0.277528426 | 0.39241537  | 0           | 0.258861174 | 1.174401691 | 0.31427462  | 0.130717929 |
| ENSMUSG000000010936 | -0.143659433 | 4.792043029  | 0.285056297 | 0.59340613  | 0.999071534 | Vac14         | Vac14         | VAC14    | 34.38821644 | 32.8466846  | 26.86076792 | 26.4345826  | 30.08517833 | 53.91676169 | 24.91538799 | 20.310241   | 16.1065743  | 17.45084352 |
| ENSMUSG000000031586 | 0.215706028  | 2.221581976  | 0.285027436 | 0.593424832 | 0.999071534 | Rbpms         | Rbpms         | RBPMS    | 4.56170218  | 3.201662398 | 5.789538949 | 4.926129565 | 3.204725518 | 6.766881022 | 4.27120937  | 4.144947144 | 4.792687961 | 3.660102012 |
| ENSMUSG000000089855 | -0.238731114 | 7.014495707  | 0.284942207 | 0.593480065 | 0.999071534 | Gm15662       | Gm15662       |          | 155.7294944 | 71.74095373 | 124.0711661 | 284.6054011 | 76.71720475 | 62.86650756 | 38.18202315 | 156.1263424 | 167.194098  | 115.4892903 |
| ENSMUSG000000024206 | 0.277803954  | 1.742315496  | 0.284739935 | 0.593611192 | 0.999071534 | Rfx2          | Rfx2          | RFX2     | 2.807201342 | 4.624623464 | 3.433331237 | 1.318260024 | 3.008517833 | 3.783632399 | 1.229590576 | 5.457513739 | 4.00700141  | 2.222204793 |
| ENSMUSG000000051107 | -0.406012704 | -0.131852814 | 0.284724579 | 0.593621149 | 0.999071534 | Gm15440       | Gm15440       |          | 1.965040939 | 1.185800888 | 0.673202203 | 0.485674746 | 0.327012808 | 0.291048646 | 0.647152935 | 1.174401691 | 0.392843275 | 0.653589645 |
| ENSMUSG000000039485 | -0.276111749 | 1.423044913  | 0.284720431 | 0.593623839 | 0.999071534 | Tsply4        | Tsply4        | TSPYL4   | 3.087921476 | 1.956571465 | 2.01960661  | 3.538487434 | 3.858751134 | 2.910486461 | 2.912188207 | 0.621742072 | 1.807079067 | 3.006512367 |
| ENSMUSG000000028962 | -0.121920558 | 6.693262662  | 0.284670012 | 0.593656535 | 0.999071534 | Slc4a2        | Slc4a2        | SLC4A2   | 110.5335528 | 134.5884008 | 93.91170738 | 99.97961554 | 121.3217518 | 115.0369774 | 70.73381577 | 112.7425623 | 71.26177017 | 111.2409576 |
| ENSMUSG000000035521 | 0.144299871  | 4.017329099  | 0.28450385  | 0.593764315 | 0.999071534 | Gnptg         | Gnptg         | GNPTG    | 17.47482835 | 15.59328168 | 12.65620142 | 18.73316877 | 14.51936867 | 14.62519447 | 19.02629628 | 15.8198816  | 13.90665195 | 17.38548456 |
| ENSMUSG000000024846 | 0.213649428  | 2.847407248  | 0.284496071 | 0.593769361 | 0.999071534 | Cst6          | Cst6          | CST6     | 5.263502516 | 3.735272798 | 7.741825339 | 7.909560147 | 9.221761185 | 5.457162114 | 7.506974044 | 5.388431287 | 9.192532646 | 7.97379367  |
| ENSMUSG000000020300 | 0.1801859    | 4.63499897   | 0.284211668 | 0.593953934 | 0.999071534 | Cpeb4         | Cpeb4         | CPEB4    | 16.70284798 | 29.17070185 | 28.20717232 | 15.05591712 | 31.78564494 | 21.68312413 | 12.74891282 | 45.24900632 | 24.19914577 | 20.19592003 |
| ENSMUSG000000005233 | 0.251975014  | 4.573693875  | 0.284203153 | 0.593959462 | 0.999071534 | Spc25         | Spc25         | SPC25    | 40.14297919 | 16.00831199 | 16.35881354 | 15.95788451 | 24.59136316 | 42.05652936 | 61.99725115 | 7.737234668 | 7.464022234 | 11.9606905  |
| ENSMUSG000000021411 | -0.117689922 | 5.790202725  | 0.28418501  | 0.593971241 | 0.999071534 | Pxdc1         | Pxdc1         | PXDC1    | 51.16124445 | 64.44827827 | 76.40845009 | 54.048661   | 51.92963391 | 45.69463744 | 49.6366301  | 60.72347565 | 42.42707375 | 54.90153018 |
| ENSMUSG000000029925 | -0.216966731 | 3.372869234  | 0.284160932 | 0.593986873 | 0.999071534 | Tbxas1        | Tbxas1        | TBXAS1   | 14.80798708 | 15.05967128 | 7.80914556  | 8.742154525 | 10.92222779 | 20.8099782  | 12.16647517 | 5.043019025 | 2.907040239 | 7.97379367  |
| ENSMUSG000000021186 | -0.204926177 | 3.315164319  | 0.284063015 | 0.594050454 | 0.999071534 | Fbln5         | Fbln5         | FBLN5    | 7.509263589 | 12.80664959 | 12.2522801  | 11.58681179 | 10.26820217 | 19.2819728  | 12.29590576 | 5.733843549 | 4.242707375 | 5.097999231 |
| ENSMUSG000000030447 | -0.128849078 | 7.150507962  | 0.283815344 | 0.59421134  | 0.999071534 | Cyflp1        | Cyflp1        | CYFIP1   | 166.3968595 | 149.4109119 | 138.2757326 | 180.6016233 | 132.4401872 | 203.151955  | 131.4367611 | 98.37341221 | 103.7891934 | 131.4368776 |
| ENSMUSG000000038702 | -0.142308402 | 4.352563451  | 0.283782398 | 0.594232748 | 0.999071534 | Dse1          | Dse1          | DSEL     | 18.94860906 | 20.51435536 | 31.4385429  | 19.0800793  | 20.53640434 | 18.40882687 | 23.55636683 | 23.0735391  | 12.72812213 | 15.55543355 |
| ENSMUSG000000059108 | -0.513487199 | -0.182831963 | 0.283600995 | 0.594350652 | 0.999071534 | Ifitm6        | Ifitm6        |          | 0           | 1.719411288 | 0.673202203 | 1.040731598 | 1.046440986 | 1.236956746 | 0.647152935 | 1.036236786 | 0           | 0.196076894 |
| ENSMUSG000000024958 | -0.146684497 | 4.698854879  | 0.283543809 | 0.59438783  | 0.999071534 | Gpr137        | Gpr137        | GPRI37   | 24.70337181 | 17.19411288 | 33.99671127 | 33.44217536 | 31.0008142  | 21.02826468 | 18.44385864 | 25.69867229 | 18.85647722 | 33.52914879 |
| ENSMUSG000000002812 | -0.13300411  | 6.422082057  | 0.283318718 | 0.594534216 | 0.999071534 | Flii          | Flii          | FLII     | 106.3929308 | 123.8569028 | 69.27250673 | 59.59922953 | 109.2876804 | 129.5166475 | 64.32700172 | 84.62600418 | 49.10540944 | 78.56147533 |
| ENSMUSG000000020808 | 0.157125289  | 5.497580466  | 0.283192897 | 0.594616075 | 0.999071534 | Fam64a        | Fam64a        | FAM64A   | 58.60032801 | 19.26926443 | 52.57709209 | 45.16775136 | 45.38937775 | 61.92059946 | 64.58586289 | 25.76775474 | 40.54142603 | 38.88858388 |
| ENSMUSG000000040818 | -0.126673701 | 4.630411556  | 0.283103635 | 0.594674162 | 0.999071534 | Dennd6a       | Dennd6a       | DENND6A  | 24.98409194 | 30.35650274 | 23.22547602 | 28.65481    | 26.09562208 | 33.76164295 | 27.63343032 | 17.82327272 | 15.71373102 | 21.37238139 |
| ENSMUSG000000045767 | 0.110900304  | 6.662937318  | 0.282980049 | 0.594754606 | 0.999071534 | B230219D22Rik | B230219D22Rik | C5orf24  | 97.33970652 | 100.200175  | 94.04634782 | 98.38382709 | 115.5009238 | 124.350534  | 117.0699659 | 98.99515428 | 72.67600597 | 99.8031388  |
| ENSMUSG000000038705 | 0.146129231  | 4.243169005  | 0.282731757 | 0.594916291 | 0.999071534 | Gmeb2         | Gmeb2         | GMEB2    | 16.49230788 | 20.75151554 | 15.75293156 | 17.9699656  | 21.77905301 | 19.57302145 | 13.52549634 | 27.01123889 | 13.04239675 | 22.35276586 |
| ENSMUSG000000087006 | -0.187719307 | 4.455812011  | 0.282533343 | 0.595045561 | 0.999071534 | Gm13889       | Gm13889       | C11orf96 | 15.43960738 | 19.44713457 | 21.34050985 | 27.75284262 | 36.36382425 | 17.09910796 | 8.9307105   | 35.57746298 | 18.77790857 | 16.0129463  |
| ENSMUSG000000036513 | 0.195768251  | 5.418201934  | 0.282512464 | 0.595059168 | 0.999071534 | Comm2         | Comm2         | COMM2    | 72.56615468 | 39.42787953 | 27.4666499  | 33.09526482 | 34.85956533 | 52.17046981 | 101.2794343 | 26.04408455 | 19.32788915 | 27.05861131 |
| ENSMUSG000000025821 | -0.166465195 | 3.404618227  | 0.282439259 | 0.595106879 | 0.999071534 | Zfp282        | Zfp282        | ZNF282   | 11.43934547 | 12.03587901 | 9.89607239  | 11.86434022 | 12.16487646 | 15.4983404  | 9.189571674 | 10.70778012 | 5.185531236 | 8.496665386 |
| ENSMUSG000000057130 | -0.11980572  | 5.895226418  | 0.282387184 | 0.595140823 | 0.999071534 | Txn14a        | Txn14a        | TXNL4A   | 74.46101559 | 59.9422349  | 64.69473175 | 66.46805807 | 55.13435943 | 66.65013995 | 82.25313801 | 41.44947144 | 39.99144544 | 47.71204409 |
| ENSMUSG000000032109 | -0.232831251 | 2.350616994  | 0.282204166 | 0.595260154 | 0.999071534 | Nlrx1         | Nlrx1         | NLRX1    | 8.070703857 | 6.581194929 | 4.106533441 | 3.954780073 | 5.297607489 | 10.84156207 | 3.818202315 | 2.832380548 | 2.907040239 | 2.941153403 |
| ENSMUSG000000022096 | -0.283460619 | 1.528615091  | 0.282132052 | 0.595307187 | 0.999071534 | Hr            | Hr            | HR       | 4.070441945 | 4.328173242 | 3.567971678 | 1.387642131 | 2.419894779 | 2.983248622 | 0.906014109 | 4.283112048 | 1.099961171 | 2.875794438 |
| ENSMUSG000000024943 | 0.112949578  | 5.490537472  | 0.28207873  | 0.595341969 | 0.999071534 | Smc5          | Smc5          | SMC5     | 37.75685805 | 52.35310921 | 43.75814322 | 43.4331987  | 46.17420849 | 51.00627523 | 41.80607959 | 50.56835515 | 42.3485051  | 38.03891734 |
| ENSMUSG000000027293 | 0.13357727   | 6.078969114  | 0.282075569 | 0.595344031 | 0.999071534 | Ehd4          | Ehd4          | EH4      | 77.1980369  | 63.61821765 | 67.1855799  | 56.68518105 | 70.24235115 | 128.2069286 | 80.05281803 | 38.75525579 | 52.56243026 | 53.33291504 |
| ENSMUSG000000094114 | 0.156019837  | 3.851040405  | 0.282062246 | 0.595352722 | 0.999071534 | Gm21967       | Gm21967       | TMEM267  | 11.01826527 | 10.37575777 | 13.93528561 | 15.47220976 | 19.29375567 | 16.15319986 | 12.9430587  | 12.22759407 | 15.55659371 | 15.16327977 |
| ENSMUSG000000051989 | 0.15104295   | 4.459197458  | 0.281808777 | 0.595518124 | 0.999071534 | Smim11        | Smim11        | SMIM11A  | 27.08949295 | 14.52606088 | 16.62809442 | 27.61407841 | 21.32123508 | 17.09910796 | 27.18042326 | 21.6228076  | 15.87086833 | 28.62722645 |
| ENSMUSG000000026556 | 0.182885251  | 3.696036464  | 0.281569679 | 0.595674235 | 0.999071534 | Vangl2        | Vangl2        | VANGL2   | 12.21132584 | 6.225454663 | 15.41633046 | 14.91715291 | 13.34212257 | 19.20921064 | 7.636404631 | 13.88557293 | 15.08518178 | 9.86920364  |
| ENSMUSG000000030652 | 0.132725292  | 5.240754214  | 0.281483979 | 0.59573021  | 0.999071534 | Coq7          | Coq7          | COQ7     | 36.91469764 | 24.48678834 | 45.50846895 | 38.02139439 | 41.46522405 | 32.74297269 | 54.94328416 | 33.02141224 | 28.44185315 | 40.52255799 |
| ENSMUSG000000036707 | 0.108769731  | 6.407725821  | 0.281473278 | 0.5957372   | 0.999071534 | Cab39         | Cab39         | CAB39    | 87.02324159 | 97.59141309 | 77.41825339 | 73.96132558 | 88.35886072 | 112.4903017 | 88.40109089 | 73.50372935 | 73.77596714 | 79.7379367  |
| ENSMUSG000000075590 | 0.217030319  | 3.49472589   | 0.281459174 | 0.595746413 | 0.999071534 | Nrbp2         | Nrbp2         | NRBP2    | 12.1411458  | 6.759065062 | 13.32940363 | 8.187088573 | 13.27672    | 10.04117829 | 3.300479967 | 17.33969555 | 10.44963113 | 15.75151045 |

|                     |              |              |             |             |             |            |            |          |             |             |             |             |             |             |             |             |             |             |
|---------------------|--------------|--------------|-------------|-------------|-------------|------------|------------|----------|-------------|-------------|-------------|-------------|-------------|-------------|-------------|-------------|-------------|-------------|
| ENSMUSG00000026273  | 0.203420769  | 3.028837229  | 0.281446892 | 0.595754437 | 0.999071534 | Mterfd2    | Mterf4     | MTERF4   | 5.403862583 | 8.122736084 | 9.020909526 | 4.717983245 | 11.70705853 | 5.093351307 | 9.836724609 | 9.464295978 | 6.128355098 | 10.39207536 |
| ENSMUSG000000052525 | -0.471080253 | -0.324845453 | 0.281438279 | 0.595760064 | 0.999071534 | Spdya      | Spdya      | SPDYA    | 0.210540101 | 0.177870133 | 0.538561763 | 2.428373729 | 0.588623054 | 0.363810808 | 0.323576467 | 0.345412262 | 1.021392516 | 0.522871716 |
| ENSMUSG000000025759 | -0.219964353 | 2.781439733  | 0.281340221 | 0.595824131 | 0.999071534 | Mfsd8      | Mfsd8      | MFSD8    | 8.702324159 | 6.699775018 | 5.654889509 | 7.978942253 | 8.633138131 | 6.548594537 | 11.13103048 | 6.63191543  | 1.885647722 | 4.575127515 |
| ENSMUSG000000056054 | -0.192886278 | 6.253375125  | 0.281280595 | 0.595863095 | 0.999071534 | S100a8     | S100a8     | S100A8   | 163.6598382 | 95.21981132 | 53.31761451 | 74.1694719  | 36.69083706 | 31.65154026 | 90.21311911 | 73.5728118  | 63.95488525 | 73.79027093 |
| ENSMUSG000000030096 | -0.121453527 | 6.6547375    | 0.281247366 | 0.595884812 | 0.999071534 | Slc6a6     | Slc6a6     | SLC6A6   | 111.6564334 | 138.4422537 | 95.72935333 | 84.92369842 | 115.6971315 | 151.4908203 | 86.20077091 | 72.05299785 | 79.4329103  | 85.55488454 |
| ENSMUSG000000025701 | -0.307340328 | 2.14763961   | 0.281241925 | 0.595888368 | 0.999071534 | Alox5      | Alox5      | ALOX5    | 8.702324159 | 5.929004441 | 4.712415424 | 2.775284262 | 2.681505025 | 9.968416129 | 6.342098761 | 1.72706131  | 0.785686551 | 1.372538255 |
| ENSMUSG000000032066 | -0.308918446 | 0.499008379  | 0.281164893 | 0.595938719 | 0.999071534 | Bco2       | Bco2       | BCO2     | 1.052700503 | 1.126510844 | 1.346404407 | 2.081463196 | 1.700466601 | 1.309718907 | 1.164875283 | 1.243484143 | 1.178529826 | 0.588230681 |
| ENSMUSG000000027860 | -0.112301582 | 5.008359963  | 0.281156278 | 0.595944351 | 0.999071534 | Vangl1     | Vangl1     | VANGL1   | 31.93191526 | 32.60952442 | 35.14115502 | 30.66689109 | 42.83867785 | 35.65345915 | 26.98627738 | 29.36004227 | 23.72773384 | 33.79058465 |
| ENSMUSG000000042520 | -0.127539198 | 6.438958352  | 0.281063564 | 0.596004965 | 0.999071534 | Ubap2l     | Ubap2l     | UBAP2L   | 81.75973908 | 115.7341667 | 92.76726363 | 70.42283815 | 110.7919393 | 127.6248313 | 55.97872886 | 95.40286676 | 52.40529295 | 78.56147533 |
| ENSMUSG000000050668 | -0.136055856 | 4.502701326  | 0.280927659 | 0.59609384  | 0.999071534 | Gpatch11   | Gpatch11   | GPATCH11 | 19.15914916 | 17.90559341 | 30.02481827 | 28.16913526 | 26.74964769 | 23.50217817 | 16.69654572 | 22.10638477 | 16.9708295  | 24.50961169 |
| ENSMUSG000000033400 | -0.134085621 | 5.217230762  | 0.28086884  | 0.596132313 | 0.999071534 | Agl        | Agl        | AGL      | 31.72137516 | 52.76813952 | 36.21827854 | 34.82981749 | 46.23961105 | 44.53044285 | 25.56254092 | 48.28863422 | 18.93504588 | 36.40494323 |
| ENSMUSG000000016933 | -0.134878706 | 5.082602734  | 0.280774815 | 0.596193825 | 0.999071534 | Plcg1      | Plcg1      | PLCG1    | 30.94939479 | 53.06458974 | 31.97710466 | 31.70762269 | 36.03681144 | 50.27865361 | 25.56254092 | 37.78810146 | 16.26371161 | 30.52263642 |
| ENSMUSG000000041831 | -0.523828755 | -0.423358732 | 0.280643743 | 0.596279595 | 0.999071534 | Sytl3      | Sytl3      | SYTL3    | 0.98252047  | 1.007930755 | 0.538561763 | 0           | 1.308051232 | 0.654859454 | 0.129430587 | 0.27632981  | 1.178529826 | 0.065358965 |
| ENSMUSG000000022552 | 0.126407371  | 5.261884073  | 0.280548316 | 0.596342056 | 0.999071534 | Sharpin    | Sharpin    | SHARPIN  | 38.45865838 | 33.43958505 | 42.6810197  | 34.69105327 | 40.61499075 | 34.99859969 | 26.01554798 | 42.41662577 | 41.16997527 | 44.24801897 |
| ENSMUSG000000049588 | -0.592070201 | -0.381649315 | 0.280450092 | 0.596406362 | 0.999071534 | Ccdc69     | Ccdc69     | CCDC69   | 1.684320805 | 0           | 0.538561763 | 1.110113705 | 0.588623054 | 1.164194584 | 1.035444696 | 0.414494714 | 0           | 0           |
| ENSMUSG000000017764 | -0.231308912 | 2.00641021   | 0.280334161 | 0.596482279 | 0.999071534 | Zswim1     | Zswim1     | ZSWIM1   | 5.54422265  | 3.557402664 | 4.375814322 | 4.371072713 | 3.924153696 | 7.203453991 | 3.300479967 | 2.486968286 | 1.571373102 | 3.594743048 |
| ENSMUSG000000036160 | 0.14720838   | 4.112106053  | 0.279992695 | 0.596706005 | 0.999071534 | Surf6      | Surf6      | SURF6    | 17.54500839 | 16.30476221 | 12.99280253 | 20.19019301 | 17.26627626 | 24.59361059 | 17.47312924 | 10.36236786 | 17.52081009 | 17.64692042 |
| ENSMUSG000000078126 | 0.170427544  | 9.813688087  | 0.279977724 | 0.596715818 | 0.999071534 | Rpl23a-ps3 | Rpl23a-ps3 |          | 829.4578164 | 689.4246364 | 1038.414399 | 1040.592834 | 776.0667959 | 484.0866606 | 813.6653849 | 918.2439572 | 1143.959618 | 1043.913381 |
| ENSMUSG000000027109 | -0.118855089 | 6.176824417  | 0.279868144 | 0.596787653 | 0.999071534 | Sp3        | Sp3        | SP3      | 70.67129378 | 84.84405355 | 82.87119124 | 56.61579894 | 97.05740141 | 82.94886414 | 69.18064873 | 85.10958135 | 45.33411399 | 55.4244019  |
| ENSMUSG000000057219 | 0.1819296    | 3.221273832  | 0.2793988   | 0.597095535 | 0.999071534 | Armcc7     | Armcc7     | ARMCC7   | 10.0357448  | 12.56948941 | 6.530061373 | 5.966861163 | 9.875786801 | 11.71470801 | 7.44225875  | 6.908245239 | 10.13535651 | 10.78422914 |
| ENSMUSG000000029772 | -0.166909679 | 3.963289215  | 0.279289151 | 0.597167511 | 0.999071534 | Ahcy12     | Ahcy12     | AHCYL2   | 14.10618674 | 26.14690958 | 13.06012275 | 14.91715291 | 16.80845833 | 24.59361059 | 11.32517636 | 16.37254122 | 11.47102364 | 8.235229528 |
| ENSMUSG000000066682 | -0.233761957 | 1.963231862  | 0.279243197 | 0.597197682 | 0.999071534 | Pilrb2     | Pilrb2     | PILRB    | 5.824942784 | 4.98036373  | 4.375814322 | 3.607869541 | 2.354492217 | 4.656778337 | 2.9769035   | 3.246875263 | 3.771295445 | 2.0261279   |
| ENSMUSG000000029209 | 0.138185112  | 4.513734949  | 0.279144418 | 0.597262544 | 0.999071534 | Gnpda2     | Gnpda2     | GNPDA2   | 18.59770889 | 24.90181865 | 22.35031315 | 22.47980252 | 23.80653242 | 18.84539983 | 22.45620684 | 32.33058772 | 19.64216377 | 19.99984314 |
| ENSMUSG000000015165 | 0.131072812  | 8.080796875  | 0.279123708 | 0.597276145 | 0.999071534 | Hnrrpl     | Hnrrpl     | HNRNPL   | 272.6494303 | 222.2190864 | 293.9874022 | 255.3261521 | 297.320045  | 352.5326726 | 265.2032727 | 258.5065369 | 243.5628308 | 252.0241671 |
| ENSMUSG000000022761 | 0.108912683  | 6.463310493  | 0.279048779 | 0.597325359 | 0.999071534 | Lztr1      | Lztr1      | LZTR1    | 80.28595837 | 96.93922261 | 79.37053978 | 87.00516161 | 96.53418092 | 96.55538834 | 93.12530732 | 85.52407606 | 76.36873276 | 89.14962758 |
| ENSMUSG000000090790 | 0.529689275  | 0.362851411  | 0.278867929 | 0.597444178 | 0.999071534 | Gm17377    | Gm17377    |          | 0           | 2.134441599 | 0           | 0.069382107 | 2.746907587 | 1.8918162   | 1.747312924 | 1.105319238 | 0.785686551 | 1.176461361 |
| ENSMUSG000000057551 | 0.129134315  | 4.313238227  | 0.278825888 | 0.597471806 | 0.999071534 | Zfp317     | Zfp317     | ZNF317   | 15.36942735 | 19.03210425 | 20.1960661  | 21.78598146 | 21.25583252 | 24.08427546 | 19.73816451 | 21.27739534 | 17.6779474  | 16.92797181 |
| ENSMUSG000000015745 | -0.125701411 | 6.921675134  | 0.278816148 | 0.597478207 | 0.999071534 | Plekho1    | Plekho1    | PLEKHO1  | 143.1672684 | 135.0627212 | 144.3345524 | 108.721761  | 126.1615413 | 120.0575665 | 108.0745401 | 152.4649724 | 65.91910163 | 117.5154182 |
| ENSMUSG000000020657 | -0.220232119 | 2.601376776  | 0.278808006 | 0.597483558 | 0.999071534 | Dnajc27    | Dnajc27    | DNAJC27  | 7.368903522 | 6.284744707 | 7.539864678 | 6.799446442 | 5.101399804 | 10.04117829 | 5.047792891 | 5.595678644 | 1.335667137 | 5.882306805 |
| ENSMUSG000000053684 | -0.174269992 | 3.058729572  | 0.278729217 | 0.597535345 | 0.999071534 | BC048403   | BC048403   | C12orf66 | 6.807463254 | 10.0200175  | 8.684308424 | 9.297202278 | 10.26820217 | 10.4049891  | 6.924536402 | 7.737234668 | 4.792687961 | 8.039152634 |
| ENSMUSG000000082536 | -0.364425561 | 2.061983124  | 0.278638442 | 0.597595022 | 0.999071534 | Gm13456    | Gm13456    |          | 7.71980369  | 8.952796705 | 0.807842644 | 1.80393477  | 4.578179312 | 3.638108076 | 10.41916225 | 1.934308667 | 0.628549241 | 0.980384468 |
| ENSMUSG000000097209 | -0.294701513 | 1.400307713  | 0.278634669 | 0.597597502 | 0.999071534 | AU022754   | AU022754   |          | 2.17558104  | 1.541541155 | 1.750325729 | 5.134275885 | 3.597140888 | 2.037340523 | 0.906014109 | 3.039627905 | 2.985608894 | 1.568615148 |
| ENSMUSG000000036323 | 0.119216214  | 6.95939824   | 0.278497467 | 0.597687726 | 0.999071534 | Srp72      | Srp72      | SRP72    | 105.9016706 | 136.6635524 | 127.5718175 | 112.7459231 | 136.2989384 | 128.6435016 | 108.9158389 | 132.3619788 | 115.1030797 | 135.0969796 |
| ENSMUSG000000040943 | 0.206440189  | 4.59431985   | 0.278394718 | 0.597755311 | 0.999071534 | Tet2       | Tet2       | TET2     | 19.58022936 | 28.87425163 | 22.21567271 | 20.25957511 | 25.04918109 | 11.49642152 | 9.707294022 | 48.77221139 | 15.94943698 | 35.62063566 |
| ENSMUSG000000031497 | -0.230136906 | 2.467613397  | 0.27838959  | 0.597758684 | 0.999071534 | Tnfsf13b   | Tnfsf13b   | TNFSF13B | 6.246022985 | 5.276813952 | 5.385617627 | 9.85225913  | 3.139322957 | 5.74821076  | 2.459181152 | 4.490359406 | 4.085570065 | 7.25484506  |
| ENSMUSG000000074292 | 0.527505327  | -0.577968885 | 0.278367531 | 0.597773196 | 0.999071534 | Gm10660    | Gm10660    |          | 0.070180034 | 0.5336104   | 0.269280881 | 1.179495811 | 0.196207685 | 0.727621615 | 0.064715293 | 0.069082452 | 0.942823861 | 1.241820326 |
| ENSMUSG000000026097 | 0.164524566  | 4.93546617   | 0.278354433 | 0.597781814 | 0.999071534 | Ormdl1     | Ormdl1     | ORMDL1   | 42.38874026 | 28.99283172 | 18.78234148 | 35.52363855 | 23.1525068  | 30.12353487 | 55.78458298 | 18.37593234 | 27.89187256 | 22.67956068 |
| ENSMUSG000000019890 | 0.383622791  | 0.147849125  | 0.278155752 | 0.597912558 | 0.999071534 | Nts        | Nts        | NTS      | 0.701800335 | 0.474320355 | 1.144443746 | 1.040731598 | 0.981038424 | 3.128772945 | 1.100159989 | 0.828989429 | 0.15713731  | 0.588230681 |
| ENSMUSG000000020451 | 0.139330503  | 4.948671644  | 0.278067495 | 0.597970655 | 0.999071534 | Limk2      | Limk2      | LIMK2    | 25.47535218 | 24.78323856 | 43.48886234 | 28.5854279  | 29.30034759 | 33.03402133 | 19.34987275 | 33.0904947  | 35.67016941 | 31.69909778 |

|                     |              |             |             |             |             |          |          |         |             |             |             |             |             |             |             |             |             |             |
|---------------------|--------------|-------------|-------------|-------------|-------------|----------|----------|---------|-------------|-------------|-------------|-------------|-------------|-------------|-------------|-------------|-------------|-------------|
| ENSMUSG00000054509  | 0.171771936  | 4.891035341 | 0.277802585 | 0.598145111 | 0.999071534 | Parp4    | Parp4    | PARP4   | 17.19410822 | 35.39615651 | 29.35161607 | 27.68346051 | 34.53255252 | 24.52084843 | 13.20191987 | 49.67028327 | 29.69895163 | 30.45727746 |
| ENSMUSG00000026269  | -0.125452904 | 5.327954152 | 0.277725311 | 0.598196019 | 0.999071534 | Rnpepl1  | Rnpepl1  | RNPEPL1 | 41.54657986 | 42.68883197 | 37.36272229 | 45.79219032 | 49.31353144 | 51.29732387 | 21.09718567 | 35.16296827 | 32.21314859 | 46.66630066 |
| ENSMUSG000000091498 | -0.673931736 | 0.390181739 | 0.277619091 | 0.598266012 | 0.999071534 | Mpc1-ps  | Mpc1-ps  |         | 2.315941107 | 3.379532531 | 0           | 0           | 1.831271725 | 3.201535107 | 1.553167044 | 0.138164905 | 0           | 0           |
| ENSMUSG000000061650 | 0.126379888  | 4.479424072 | 0.27758782  | 0.598286621 | 0.999071534 | Med9     | Med9     | MED9    | 18.59770889 | 19.86216488 | 26.59148704 | 18.0393477  | 27.20746562 | 24.30256195 | 22.45620684 | 23.28078646 | 18.14935933 | 23.59458619 |
| ENSMUSG00000030089  | -0.167859301 | 3.167337266 | 0.277572844 | 0.598296491 | 0.999071534 | Slc41a3  | Slc41a3  | SLC41A3 | 10.59718506 | 9.308536972 | 9.290190407 | 9.366584384 | 10.07199449 | 8.949745867 | 6.406814054 | 9.53337843  | 6.206923753 | 9.215613995 |
| ENSMUSG00000045106  | 0.3263719    | 1.17706008  | 0.277544427 | 0.598315221 | 0.999071534 | Ccdc73   | Ccdc73   | CCDC73  | 0.98252047  | 1.245090933 | 1.95228639  | 4.162926393 | 1.308051232 | 0.800383777 | 1.164875283 | 2.348803381 | 2.907040239 | 3.725460977 |
| ENSMUSG00000035901  | -0.123506687 | 6.332747432 | 0.277281805 | 0.598488378 | 0.999071534 | Dennd5a  | Dennd5a  | DENND5A | 90.6024233  | 124.7462534 | 58.9051928  | 71.60233396 | 91.43278111 | 111.9809666 | 68.66292638 | 76.26702744 | 57.27654957 | 64.37858004 |
| ENSMUSG00000010755  | 0.127286422  | 6.225393471 | 0.277099096 | 0.598608906 | 0.999071534 | Cars     | Cars     | CARS    | 71.44327415 | 78.91504911 | 83.20779234 | 54.88124628 | 83.51907116 | 71.30691829 | 48.21289364 | 89.18544604 | 77.70439989 | 83.46339767 |
| ENSMUSG00000026623  | 0.110334872  | 6.4620847   | 0.277089707 | 0.598615102 | 0.999071534 | Lpgat1   | Lpgat1   | LPGAT1  | 84.07568018 | 97.35425292 | 73.58100083 | 86.51948687 | 98.23464752 | 122.6770043 | 88.53052148 | 82.34628325 | 75.34734024 | 76.86214226 |
| ENSMUSG00000046410  | 0.231569371  | 2.160289978 | 0.277002797 | 0.598672452 | 0.999071534 | Kcnk6    | Kcnk6    | KCNK6   | 6.456563086 | 3.853852886 | 2.962089695 | 4.371072713 | 3.073920395 | 9.386318836 | 5.241938772 | 2.763298096 | 2.671334273 | 3.660102012 |
| ENSMUSG00000015291  | -0.140752588 | 7.33820099  | 0.276692349 | 0.598877409 | 0.999071534 | Gdi1     | Gdi1     | GDI1    | 202.890477  | 159.0751891 | 163.7900961 | 170.4718358 | 184.6968339 | 131.3357015 | 100.1792743 | 184.3810654 | 116.1244722 | 204.7042768 |
| ENSMUSG00000059995  | -0.112956784 | 5.688886905 | 0.276419102 | 0.599057928 | 0.999071534 | Atxn7l3  | Atxn7l3  | ATXN7L3 | 68.0044525  | 58.8750141  | 52.37513143 | 41.07420708 | 58.60069519 | 71.45244261 | 42.90623958 | 51.9500042  | 29.38467701 | 48.88850545 |
| ENSMUSG00000063317  | 0.137777895  | 4.426121644 | 0.276372239 | 0.599088899 | 0.999071534 | Usp31    | Usp31    | USP31   | 17.82572852 | 21.93731643 | 21.60979073 | 18.80255087 | 25.57240158 | 33.03402133 | 14.81980221 | 15.9580465  | 22.3920667  | 22.67956068 |
| ENSMUSG00000049044  | 0.274702636  | 3.465777752 | 0.27630442  | 0.599133725 | 0.999071534 | Rapgef4  | Rapgef4  | RAPGEF4 | 7.088183388 | 10.0200175  | 17.70521795 | 8.395234892 | 8.044515076 | 5.093351307 | 2.006174098 | 8.35897674  | 19.64216377 | 18.82338178 |
| ENSMUSG000000093445 | -0.134732616 | 4.334010019 | 0.276081488 | 0.599281126 | 0.999071534 | Lrch4    | Lrch4    | LRCH4   | 23.79103137 | 21.52228612 | 14.54116759 | 21.57783514 | 27.66528356 | 26.92199976 | 19.41458804 | 15.9580465  | 11.86386692 | 20.19592003 |
| ENSMUSG00000022636  | 0.211376581  | 3.617614839 | 0.276051705 | 0.599300824 | 0.999071534 | Alcam    | Alcam    | ALCAM   | 14.38690688 | 17.19411288 | 10.97319592 | 6.03624327  | 10.26820217 | 24.0115133  | 15.07866338 | 12.9184186  | 2.592765618 | 12.09140843 |
| ENSMUSG00000023022  | -0.144808947 | 7.95562607  | 0.276005689 | 0.599331261 | 0.999071534 | Lima1    | Lima1    | LIMA1   | 211.382261  | 416.2754018 | 230.0331929 | 221.5370662 | 276.9144458 | 304.3641216 | 187.7390664 | 258.0229597 | 200.6643451 | 192.8089453 |
| ENSMUSG000000098557 | -0.135440487 | 5.7210307   | 0.275823913 | 0.599451528 | 0.999071534 | Kctd12   | Kctd12   | KCTD12  | 67.09211207 | 63.14389729 | 50.89408658 | 53.77113258 | 51.34101085 | 59.53863696 | 37.79373139 | 28.11655812 | 35.67016941 | 51.3721461  |
| ENSMUSG00000022016  | -0.114334963 | 5.904812709 | 0.275740088 | 0.599507006 | 0.999071534 | Akap11   | Akap11   | AKAP11  | 60.42500888 | 87.9864259  | 56.54898509 | 58.62788003 | 59.38552593 | 74.43569124 | 60.5735147  | 62.93411413 | 33.54881573 | 51.11071024 |
| ENSMUSG00000000934  | -0.167833133 | 3.445468767 | 0.275709727 | 0.599527102 | 0.999071534 | Top1mt   | Top1mt   | TOP1MT  | 13.75528657 | 11.26510844 | 14.74312825 | 7.84017804  | 11.77246109 | 16.00767553 | 8.9307105   | 6.63191543  | 7.464022234 | 11.11102397 |
| ENSMUSG00000072680  | -0.489169821 | 2.18675503  | 0.275620882 | 0.599585917 | 0.999071534 | Tmem254c | Tmem254c | TMEM254 | 10.80772517 | 7.174095373 | 3.164050356 | 0           | 6.082438228 | 10.62327558 | 4.206494076 | 0           | 0.707117896 | 4.052255799 |
| ENSMUSG00000009470  | -0.131512999 | 7.50808541  | 0.275564201 | 0.599623446 | 0.999071534 | Tnpo1    | Tnpo1    | TNPO1   | 163.6598382 | 182.0797264 | 128.8580363 | 190.5926467 | 232.5061065 | 268.2013274 | 157.1934479 | 176.9201606 | 114.2388245 | 143.7243629 |
| ENSMUSG00000026457  | -0.126322363 | 7.252197887 | 0.275556334 | 0.599628656 | 0.999071534 | Adipor1  | Adipor1  | ADIPOP1 | 172.5025224 | 206.0921944 | 134.2365194 | 149.795968  | 164.1604296 | 146.2519447 | 165.2181443 | 157.9224862 | 103.0035068 | 132.3519031 |
| ENSMUSG00000037816  | 0.184530747  | 3.298380809 | 0.275249674 | 0.599831788 | 0.999071534 | Fbxw17   | Fbxw17   |         | 13.26402634 | 10.07930755 | 9.222870187 | 3.677251647 | 11.44544828 | 11.71470801 | 10.41916225 | 8.773471454 | 7.228316269 | 12.1567674  |
| ENSMUSG00000021846  | -0.208994223 | 2.896588734 | 0.275149232 | 0.599898353 | 0.999071534 | Peli2    | Peli2    | PELI2   | 4.772242281 | 12.21374915 | 5.789538949 | 10.47669809 | 7.194281776 | 8.658697221 | 3.753487022 | 6.010173358 | 7.306884924 | 6.862691273 |
| ENSMUSG00000023980  | 0.161413577  | 3.548743554 | 0.275140281 | 0.599904286 | 0.999071534 | Taf8     | Taf8     | TAF8    | 13.96582667 | 12.1544591  | 9.492151068 | 9.158438064 | 12.16487646 | 18.77263767 | 10.22501637 | 14.57639746 | 7.935434165 | 8.888819173 |
| ENSMUSG00000028458  | 0.141420768  | 4.3146103   | 0.275096001 | 0.599933636 | 0.999071534 | Tesk1    | Tesk1    | TESK1   | 22.10671057 | 18.91352417 | 16.69541464 | 14.22333184 | 26.2264272  | 31.36049162 | 12.9430587  | 17.96143762 | 16.34228026 | 23.33315033 |
| ENSMUSG00000028917  | -0.14495974  | 4.71090293  | 0.275095461 | 0.599933994 | 0.999071534 | Plekhn2  | Plekhn2  | PLEKHM2 | 30.03705436 | 42.68883197 | 24.63920065 | 18.94131509 | 26.48803745 | 30.19629703 | 15.8552469  | 34.05764903 | 15.63516236 | 25.09784237 |
| ENSMUSG00000024851  | -0.113190647 | 5.487234453 | 0.275049348 | 0.599964563 | 0.999071534 | Pitpnm1  | Pitpnm1  | PITPNM1 | 52.98592532 | 49.15144681 | 47.52807556 | 44.12701977 | 47.74386997 | 54.93543195 | 28.15115266 | 44.6963467  | 33.78452169 | 47.58132616 |
| ENSMUSG00000028989  | 0.210092073  | 7.853834381 | 0.275028176 | 0.599978599 | 0.999071534 | Angptl7  | Angptl7  | ANGPTL7 | 99.5854676  | 150.6560028 | 95.12347134 | 359.3993119 | 399.805859  | 181.978166  | 236.9226894 | 197.9903086 | 263.5192692 | 286.7297773 |
| ENSMUSG00000045435  | 0.146040959  | 4.723265203 | 0.27494127  | 0.600036222 | 0.999071534 | Tmem60   | Tmem60   | TMEM60  | 22.52779077 | 21.70015625 | 29.68821717 | 29.34863107 | 25.76860927 | 16.80805931 | 31.12805616 | 30.87985622 | 28.91326508 | 21.50309932 |
| ENSMUSG00000046589  | 0.223321832  | 2.223915607 | 0.274883664 | 0.600074424 | 0.999071534 | Lrrc8e   | Lrrc8e   | LRRC8E  | 4.56170218  | 5.336103997 | 2.356207712 | 5.550568524 | 3.858751134 | 4.220205368 | 3.882917609 | 5.802926001 | 5.499805857 | 3.660102012 |
| ENSMUSG00000022139  | 0.129203277  | 7.233576871 | 0.274835087 | 0.600106642 | 0.999071534 | Mbnl2    | Mbnl2    | MBNL2   | 112.0775136 | 137.552903  | 155.9809505 | 148.2695617 | 191.5641029 | 176.6665282 | 136.2256928 | 180.7196955 | 131.209654  | 133.0054928 |
| ENSMUSG00000051615  | -0.122324043 | 5.742905255 | 0.274613793 | 0.600253459 | 0.999071534 | Rap2a    | Rap2a    | RAP2A   | 57.47744747 | 72.57101435 | 51.43264834 | 54.11804311 | 53.69550307 | 82.65781549 | 63.61513349 | 33.50498941 | 33.31310976 | 41.76437832 |
| ENSMUSG00000022724  | 0.170656034  | 3.56157337  | 0.274607815 | 0.600257426 | 0.999071534 | Mina     | Mina     | MINA    | 14.52726694 | 11.02794826 | 11.915679   | 8.117706466 | 11.70705853 | 16.66253499 | 17.02012219 | 7.253657501 | 11.15674902 | 8.169870563 |
| ENSMUSG00000063193  | -0.271864131 | 2.133513673 | 0.274477375 | 0.600344003 | 0.999071534 | Cd300lb  | Cd300lb  | CD300LB | 4.772242281 | 7.351965506 | 3.635291898 | 4.093544286 | 4.316569065 | 5.966497245 | 7.765835218 | 3.45412262  | 0.785686551 | 1.503256184 |
| ENSMUSG00000070565  | 0.137122148  | 4.691102893 | 0.274359927 | 0.600421978 | 0.999071534 | Rasa12   | Rasa12   | RASAL2  | 21.68563036 | 28.45922132 | 26.12024549 | 20.81463196 | 30.28138602 | 26.99476192 | 19.60873392 | 37.09727694 | 25.53481291 | 19.08481764 |
| ENSMUSG00000025507  | 0.234914976  | 2.031365573 | 0.274249241 | 0.600495484 | 0.999071534 | Lrdd     | Pidd1    | PIDD1   | 3.438821644 | 3.794562842 | 4.712415424 | 2.775284262 | 4.185763942 | 7.130691829 | 3.559341141 | 2.141556024 | 2.042785033 | 6.601255415 |
| ENSMUSG00000027298  | -0.16655236  | 3.697073308 | 0.27412484  | 0.60057812  | 0.999071534 | Tyro3    | Tyro3    | TYRO3   | 18.94860906 | 14.88180115 | 8.213066882 | 14.50086027 | 13.99614818 | 16.95358363 | 10.61330813 | 9.53337843  | 13.19953406 | 8.104511599 |

|                    |              |              |             |             |             |               |               |          |             |             |              |             |             |             |             |             |             |             |
|--------------------|--------------|--------------|-------------|-------------|-------------|---------------|---------------|----------|-------------|-------------|--------------|-------------|-------------|-------------|-------------|-------------|-------------|-------------|
| ENSMUSG00000019373 | 0.124278411  | 6.286688463  | 0.273912524 | 0.600719211 | 0.999071534 | Cops3         | Cops3         | COPS3    | 98.25204696 | 62.31383667 | 74.59080414  | 78.88745515 | 73.0546613  | 80.83876145 | 118.2348412 | 58.02926001 | 61.44068829 | 74.90137332 |
| ENSMUSG00000027823 | -0.12633684  | 6.141953027  | 0.273882591 | 0.600739109 | 0.999071534 | Gmps          | Gmps          | GMPS     | 77.1980369  | 85.25908386 | 74.38884348  | 66.67620439 | 79.13709953 | 119.7665179 | 79.92338745 | 42.83112048 | 44.6269961  | 50.52247956 |
| ENSMUSG00000057751 | -0.139786027 | 4.394484496  | 0.273774729 | 0.600810819 | 0.999071534 | Megf6         | Megf6         | MEGF6    | 19.08896912 | 25.07968878 | 19.99410544  | 24.07559097 | 25.3761939  | 27.28581057 | 11.45460695 | 23.41895136 | 13.1209654  | 22.35276586 |
| ENSMUSG00000085032 | 0.335656374  | 0.335808419  | 0.273487841 | 0.601001638 | 0.999071534 | Gm11217       | Gm11217       |          | 0.912340436 | 1.541541155 | 0.1009803305 | 0.416292639 | 1.308051232 | 1.964578361 | 1.747312924 | 1.174401691 | 0.31427462  | 1.111102397 |
| ENSMUSG00000041390 | 0.114168175  | 6.247398726  | 0.273459493 | 0.601020499 | 0.999071534 | Mdfic         | Mdfic         | MDFIC    | 64.98671106 | 80.69375044 | 77.14897251  | 77.98548776 | 76.71720475 | 74.87226421 | 69.69837108 | 94.78112468 | 69.53325976 | 67.84260516 |
| ENSMUSG00000065944 | -0.448916254 | 0.865891763  | 0.273423843 | 0.601044222 | 0.999071534 | Rnu2-10       | Rnu2-10       |          | 1.824680872 | 0.415030311 | 0.471241542  | 6.521918016 | 0.654025616 | 0.363810808 | 0.19414588  | 1.519813953 | 3.064177549 | 1.176461361 |
| ENSMUSG00000065767 | -0.448915953 | 0.865891763  | 0.273415303 | 0.601049905 | 0.999071534 | Gm23849       | Gm23849       |          | 1.824680872 | 0.415030311 | 0.471241542  | 6.521918016 | 0.654025616 | 0.363810808 | 0.19414588  | 1.519813953 | 3.064177549 | 1.176461361 |
| ENSMUSG00000065251 | -0.448914397 | 0.865891763  | 0.273371159 | 0.601079283 | 0.999071534 | Gm23971       | Gm23971       |          | 1.824680872 | 0.415030311 | 0.471241542  | 6.521918016 | 0.654025616 | 0.363810808 | 0.19414588  | 1.519813953 | 3.064177549 | 1.176461361 |
| ENSMUSG00000064702 | -0.448914069 | 0.865891763  | 0.273361834 | 0.601085489 | 0.999071534 | Gm24950       | Gm24950       |          | 1.824680872 | 0.415030311 | 0.471241542  | 6.521918016 | 0.654025616 | 0.363810808 | 0.19414588  | 1.519813953 | 3.064177549 | 1.176461361 |
| ENSMUSG00000038612 | -0.132793995 | 8.388482529  | 0.273262325 | 0.601151725 | 0.999071534 | Mcl1          | Mcl1          | MCL1     | 450.2049152 | 417.9948131 | 366.8952009  | 281.3444421 | 308.5692856 | 345.8385537 | 357.1637047 | 323.9967017 | 237.827319  | 283.8539828 |
| ENSMUSG00000046516 | 0.146328762  | 6.509415947  | 0.273188251 | 0.601201041 | 0.999071534 | Cox17         | Cox17         | COX17    | 97.05898639 | 62.31383667 | 98.22020148  | 122.2512717 | 64.94474366 | 63.23031836 | 84.51817328 | 91.32700206 | 100.3321726 | 108.8880349 |
| ENSMUSG00000042078 | -0.421714377 | -0.011047883 | 0.273187868 | 0.601201296 | 0.999071534 | Svop          | Svop          | SVOP     | 1.894860906 | 0.296450222 | 1.817645949  | 0.277528426 | 0.850233301 | 1.018670261 | 0.258861174 | 0.828989429 | 0.15713731  | 1.372538255 |
| ENSMUSG00000041872 | 0.379642675  | 0.89595323   | 0.273160113 | 0.601219776 | 0.999071534 | Il17f         | Il17f         | IL17F    | 1.543960738 | 0.652190488 | 1.211763966  | 3.538487434 | 0.784830739 | 1.45524323  | 0.19414588  | 1.796143762 | 4.00700141  | 1.437897219 |
| ENSMUSG00000078570 | 0.137806441  | 4.56563054   | 0.273115876 | 0.601249234 | 0.999071534 | 1110065P20Rik | 1110065P20Rik | C1orf122 | 27.37021308 | 18.73565403 | 24.30259954  | 26.4345826  | 19.22835311 | 19.57302145 | 32.42236203 | 21.83005496 | 17.44224143 | 27.32004716 |
| ENSMUSG00000029063 | 0.147948948  | 6.192062749  | 0.273105512 | 0.601256135 | 0.999071534 | Nadk          | Nadk          | NADK     | 87.58468186 | 87.57139559 | 51.43264834  | 50.57955567 | 84.69631727 | 122.2404314 | 113.7047706 | 41.51855389 | 49.41968406 | 55.68583776 |
| ENSMUSG00000026313 | 0.174216503  | 5.463743428  | 0.272782287 | 0.601471468 | 0.999071534 | Hdac4         | Hdac4         | HDAC4    | 31.08975486 | 48.49925632 | 43.62350278  | 42.46184921 | 48.79031095 | 26.8492376  | 17.79670571 | 60.23989849 | 57.90509881 | 52.35253057 |
| ENSMUSG00000005968 | -0.116283232 | 5.079012765  | 0.272716375 | 0.601515398 | 0.999071534 | Tuft1         | Tuft1         | TUFT1    | 40.70441945 | 38.47923882 | 37.63200317  | 30.59750899 | 34.79416277 | 44.60320501 | 27.24513855 | 38.54800844 | 23.41345922 | 24.44425272 |
| ENSMUSG00000054405 | 0.11360745   | 6.366246064  | 0.272603261 | 0.601590805 | 0.999071534 | Dnajk8        | Dnajk8        | DNAJ8    | 89.83044293 | 81.87955133 | 80.98622507  | 69.45148866 | 89.73231451 | 102.6674099 | 116.0345212 | 70.6713488  | 55.54803915 | 74.5745785  |
| ENSMUSG00000023982 | 0.208043139  | 3.619395973  | 0.272474226 | 0.601676849 | 0.999071534 | Guca1a        | Guca1a        | GUCA1A   | 11.64988557 | 5.454684085 | 12.72352164  | 18.38625824 | 9.744981678 | 7.057929668 | 9.383717555 | 10.63869767 | 17.36367278 | 15.62079252 |
| ENSMUSG00000024409 | 0.456618219  | -0.143066523 | 0.272265152 | 0.601816321 | 0.999071534 | Psors1c2      | Psors1c2      | PSORS1C2 | 0.140360067 | 0.237160178 | 1.95228639   | 0.832585279 | 0.196207685 | 0.582097292 | 0.19414588  | 1.105319238 | 0.864255206 | 1.503256184 |
| ENSMUSG00000025534 | -0.20950386  | 6.469786051  | 0.272191309 | 0.601865598 | 0.999071534 | Gusb          | Gusb          | GUSB     | 138.8862864 | 99.66656465 | 75.26400634  | 91.37623433 | 88.62047096 | 182.9240741 | 143.2149445 | 32.67599998 | 20.8206936  | 48.16955684 |
| ENSMUSG00000027827 | 0.415706399  | 0.462634744  | 0.272183063 | 0.6018711   | 0.999071534 | Kcnab1        | Kcnab1        | KCNAB1   | 0.491260235 | 0.592900444 | 2.01960661   | 1.457024238 | 0.915635862 | 0.363810808 | 0.323576467 | 2.625133191 | 0.235705965 | 3.267948225 |
| ENSMUSG00000030435 | 0.131034303  | 7.293434989  | 0.272179521 | 0.601873465 | 0.999071534 | U2af2         | U2af2         | U2AF2    | 187.5210496 | 139.6873446 | 147.8352039  | 128.5650434 | 175.9328907 | 260.9251112 | 177.8376265 | 148.9417674 | 92.23960108 | 137.8420561 |
| ENSMUSG00000005465 | -0.388202664 | 0.107961838  | 0.272174663 | 0.601876706 | 0.999071534 | Il27ra        | Il27ra        | IL27RA   | 2.315941107 | 0.830060622 | 0.740522424  | 0.832585279 | 0.850233301 | 2.110102684 | 1.164875283 | 0.27632981  | 0.392843275 | 0.261435858 |
| ENSMUSG00000075254 | -0.170411579 | 3.682831464  | 0.272044177 | 0.601963806 | 0.999071534 | Heg1          | Heg1          | HEG1     | 13.89564664 | 18.97281421 | 7.607184899  | 14.01518552 | 15.43500454 | 13.46099988 | 9.836724609 | 16.71795348 | 9.742513232 | 7.908434705 |
| ENSMUSG00000034354 | -0.116857926 | 5.558888158  | 0.27201938  | 0.601980361 | 0.999071534 | Mtmt3         | Mtmt3         | MTMR3    | 55.37204646 | 67.47207054 | 38.91108736  | 36.77251647 | 56.76942347 | 58.50077786 | 36.49942552 | 50.77560251 | 31.663168   | 43.13691657 |
| ENSMUSG00000006356 | -0.126463687 | 4.854882046  | 0.271897468 | 0.602061766 | 0.999071534 | Crip2         | Crip2         | CRIP2    | 29.05453389 | 34.92183616 | 39.31500868  | 27.47531419 | 25.31079134 | 37.83632399 | 34.81682789 | 24.45518815 | 15.63516236 | 23.52927222 |
| ENSMUSG00000020029 | 0.135266282  | 8.75092808   | 0.271860845 | 0.602086224 | 0.999071534 | Nudt4         | Nudt4         |          | 377.6387605 | 469.6957318 | 406.5468106  | 439.3274987 | 435.4502551 | 394.2253911 | 474.6866777 | 500.1569553 | 398.2645127 | 382.2845834 |
| ENSMUSG00000049504 | 0.162784717  | 3.6182485    | 0.271806863 | 0.602122281 | 0.999071534 | Proser1       | Proser1       | PROSER1  | 10.2462849  | 13.34025999 | 13.12744297  | 13.32136446 | 9.221761185 | 16.88082147 | 6.924536402 | 13.12566595 | 11.5495923  | 13.72538255 |
| ENSMUSG00000002602 | -0.14389718  | 8.656794711  | 0.271786727 | 0.602135732 | 0.999071534 | Axl           | Axl           | AXL      | 456.7316583 | 557.3857075 | 376.1853913  | 358.8442551 | 457.1639056 | 630.1930809 | 441.8113086 | 350.2480336 | 223.2921178 | 269.9325234 |
| ENSMUSG00000038697 | -0.130040836 | 4.821711016  | 0.27170625  | 0.602189495 | 0.999071534 | Taf5l         | Taf5l         | TAF5L    | 34.1074963  | 27.92561092 | 29.89017783  | 33.02588272 | 27.53447843 | 47.29540499 | 27.8275762  | 23.0735391  | 13.98522061 | 23.00635551 |
| ENSMUSG00000006442 | 0.165308453  | 6.25550168   | 0.27123706  | 0.602503147 | 0.999071534 | Srm           | Srm           | SRM      | 92.91836441 | 57.74850325 | 68.39734387  | 80.41386149 | 73.44707667 | 159.4218959 | 115.9698059 | 31.50159829 | 43.13419165 | 60.45704217 |
| ENSMUSG00000061313 | 0.120971471  | 4.98072183   | 0.271144918 | 0.602564784 | 0.999071534 | Ddhd2         | Ddhd2         | DDHD2    | 33.54605603 | 30.23792265 | 24.57188042  | 39.96409337 | 27.33827075 | 38.70946993 | 31.12805616 | 24.31702324 | 27.8133039  | 36.79709702 |
| ENSMUSG00000062044 | 0.334574417  | 0.261215723  | 0.270945844 | 0.602697997 | 0.999071534 | Lmtk3         | Lmtk3         | LMTK3    | 1.403600671 | 1.126510844 | 0.942483085  | 0.416292639 | 1.046440986 | 0.9459081   | 0.647152935 | 1.105319238 | 1.021392516 | 1.960768935 |
| ENSMUSG00000033910 | 0.571753106  | -0.764824686 | 0.270679299 | 0.602876456 | 0.999071534 | Gucy1a3       | Gucy1a3       | GUCY1A3  | 0.070180034 | 1.007930755 | 0            | 0.763203172 | 0           | 0.436572969 | 1.100159989 | 0.414494714 | 0.235705965 | 0.457512752 |
| ENSMUSG00000051451 | 0.121785334  | 5.604103821  | 0.270634695 | 0.602906331 | 0.999071534 | Crebzf        | Crebzf        | CREBZF   | 46.95044244 | 42.68883197 | 47.73003622  | 53.9792789  | 49.18272632 | 47.00435634 | 31.7104938  | 53.67706551 | 52.48386161 | 54.70545329 |
| ENSMUSG00000058979 | -0.247734083 | 1.789446205  | 0.270515643 | 0.602986084 | 0.999071534 | Cecr5         | Cecr5         | CECR5    | 3.859901845 | 3.557402664 | 3.298690797  | 4.717983245 | 3.204725518 | 5.020589145 | 2.847472913 | 0.898071881 | 2.749902928 | 3.464025119 |
| ENSMUSG00000040599 | -0.121976744 | 5.024556587  | 0.270294484 | 0.603134299 | 0.999071534 | Mis12         | Mis12         | MIS12    | 36.91469764 | 32.72810451 | 33.39082929  | 38.8539767  | 33.15909873 | 47.58645364 | 30.93391028 | 19.13583931 | 21.13496822 | 35.09776394 |
| ENSMUSG00000038872 | 0.242081933  | 6.740219148  | 0.270018068 | 0.603319653 | 0.999071534 | Zfhx3         | Zfhx3         | ZFHX3    | 46.4591822  | 45.35688397 | 168.03127    | 146.3268627 | 95.68394761 | 59.73773461 | 30.48090323 | 116.4039323 | 183.5363783 | 132.8094159 |

|                     |              |              |             |             |             |               |               |         |             |             |             |             |             |             |             |             |             |             |
|---------------------|--------------|--------------|-------------|-------------|-------------|---------------|---------------|---------|-------------|-------------|-------------|-------------|-------------|-------------|-------------|-------------|-------------|-------------|
| ENSMUSG00000018363  | 0.117597487  | 6.09627875   | 0.269831786 | 0.603444634 | 0.999071534 | Smurf2        | Smurf2        | SMURF2  | 50.74016425 | 88.40145621 | 66.98361924 | 55.64444945 | 79.07169697 | 75.23607501 | 67.88634286 | 82.00087099 | 59.24076594 | 57.71196566 |
| ENSMUSG00000029207  | -0.137518303 | 5.010184277  | 0.269780274 | 0.603479204 | 0.999071534 | Apbb2         | Apbb2         | APBB2   | 22.87869093 | 32.72810451 | 42.07513771 | 30.31998056 | 46.69742898 | 36.52660508 | 17.21426807 | 29.70545453 | 31.03461876 | 32.15661054 |
| ENSMUSG00000000948  | -0.46140584  | -0.164610253 | 0.269652518 | 0.603564961 | 0.999071534 | Snrpn         | Gm38393       | SNURF   | 0.912340436 | 0.296450222 | 0.740522424 | 2.150845303 | 0.39241537  | 0.582097292 | 0.453007054 | 0           | 0.707117896 | 1.30717929  |
| ENSMUSG000000035726 | -0.121838476 | 6.527939992  | 0.26951855  | 0.603654916 | 0.999071534 | Supt16        | Supt16        | SUPT16H | 93.54998471 | 99.13295425 | 110.3378411 | 82.77285311 | 113.9312623 | 158.0394148 | 73.90486515 | 63.14136149 | 60.81213905 | 85.42416661 |
| ENSMUSG00000040097  | -0.141660912 | 4.332025076  | 0.269488301 | 0.603675231 | 0.999071534 | Flywch1       | Flywch1       | FLYWCH1 | 25.47535218 | 23.00453723 | 23.02351536 | 20.1208109  | 17.33167882 | 30.05077271 | 11.06631518 | 15.8198816  | 18.69933991 | 17.25476663 |
| ENSMUSG00000046152  | -0.205465188 | 2.888265078  | 0.269462294 | 0.603692698 | 0.999071534 | Fut10         | Fut10         | FUT10   | 10.59718506 | 7.292675462 | 9.290190407 | 7.909560147 | 5.297607489 | 12.44232962 | 8.412988152 | 3.039627905 | 4.242707375 | 5.816947841 |
| ENSMUSG000000052331 | -0.221190537 | 7.040324796  | 0.269396039 | 0.603737203 | 0.999071534 | Ankrd44       | Ankrd44       | ANKRD44 | 71.65381425 | 157.7708082 | 106.1639875 | 167.1414947 | 231.2634578 | 49.47826984 | 40.57648901 | 217.4715601 | 105.0462919 | 152.6785411 |
| ENSMUSG000000054519 | 0.194362978  | 3.185301605  | 0.269170787 | 0.603888558 | 0.999071534 | Zfp867        | Zfp867        |         | 11.15862533 | 9.071376794 | 5.520258068 | 8.395234892 | 9.352566308 | 5.529924276 | 15.59638573 | 8.704389002 | 7.621159544 | 7.97379367  |
| ENSMUSG000000062382 | 0.316907302  | 2.098106687  | 0.269162684 | 0.603894005 | 0.999071534 | Gm10116       | Gm10116       | FTL     | 5.965302851 | 4.506043375 | 3.029409915 | 3.469105327 | 2.289089656 | 0.509335131 | 2.135604685 | 10.08603805 | 5.342668547 | 2.810435474 |
| ENSMUSG000000009350 | 0.310550036  | 1.013192647  | 0.26910261  | 0.603934385 | 0.999071534 | Mpo           | Mpo           | MPO     | 2.526481208 | 1.067220799 | 0.807842644 | 2.636520049 | 1.700466601 | 1.091432423 | 1.876743511 | 0.898071881 | 3.221314859 | 2.548999616 |
| ENSMUSG000000018570 | 0.34921155   | 1.592697039  | 0.268838516 | 0.604111971 | 0.999071534 | 2810408A11Rik | 2810408A11Rik |         | 1.543960738 | 2.786632087 | 1.750325729 | 3.81601586  | 3.204725518 | 0.873145938 | 0.19414588  | 5.664761096 | 3.064177549 | 5.163358196 |
| ENSMUSG000000025159 | -0.118664601 | 5.677735443  | 0.268798994 | 0.604138557 | 0.999071534 | Mms19         | Mms19         | MMS19   | 52.56484512 | 50.21866761 | 57.76074905 | 57.58714844 | 57.35804652 | 53.98952385 | 28.34529854 | 48.77221139 | 45.72695727 | 58.10411944 |
| ENSMUSG000000022558 | -0.171008559 | 5.823960499  | 0.268651905 | 0.604237522 | 0.999071534 | Mroh1         | Mroh1         | MROH1   | 43.58180083 | 76.60273737 | 59.17447368 | 68.48013916 | 62.00162839 | 44.8214915  | 19.99702569 | 99.34056654 | 35.04162017 | 55.29368397 |
| ENSMUSG000000071102 | 0.395928472  | 0.296226898  | 0.268638151 | 0.604246779 | 0.999071534 | Gm10313       | Gm10313       |         | 0.421080201 | 0.711480533 | 1.683005509 | 0.832585279 | 1.24264867  | 0.509335131 | 0.323576467 | 2.141556024 | 0.31427462  | 2.679717545 |
| ENSMUSG000000031861 | 0.184710176  | 2.590228751  | 0.268625485 | 0.604255302 | 0.999071534 | Lpar2         | Lpar2         | LPAR2   | 5.333682549 | 4.861783641 | 5.99149961  | 5.273040098 | 7.194281776 | 8.003837767 | 5.047792891 | 5.319348834 | 5.028393926 | 7.124127131 |
| ENSMUSG000000041341 | -0.132303561 | 4.542974847  | 0.268587539 | 0.604280841 | 0.999071534 | Atg2b         | Atg2b         | ATG2B   | 20.28202969 | 31.30514345 | 29.14965541 | 18.94131509 | 26.48803745 | 32.67021052 | 15.72581632 | 20.79381817 | 15.87086833 | 23.85602204 |
| ENSMUSG000000037674 | 0.136248214  | 4.723161564  | 0.268509681 | 0.604333248 | 0.999071534 | Rfx7          | Rfx7          | RFX7    | 21.9663505  | 23.95317794 | 22.48495359 | 31.70762269 | 29.36575016 | 39.65537803 | 17.27898336 | 24.17885834 | 29.38467701 | 22.54884275 |
| ENSMUSG000000037461 | 0.112825847  | 5.044726505  | 0.268401813 | 0.60440587  | 0.999071534 | Ints7         | Ints7         | INTS7   | 33.82677617 | 26.26548967 | 36.55487965 | 33.51155746 | 33.68231922 | 50.20589145 | 29.89465559 | 29.29095982 | 25.69195022 | 32.94091811 |
| ENSMUSG000000004891 | -0.145489991 | 8.402474954  | 0.268348274 | 0.604441922 | 0.999071534 | Nes           | Nes           | NES     | 382.6215429 | 386.8082497 | 386.0814637 | 353.1549223 | 335.3189333 | 627.500881  | 303.9677335 | 207.0401098 | 225.6491774 | 252.0241671 |
| ENSMUSG000000022856 | -0.157699081 | 3.778373617  | 0.268330107 | 0.604454156 | 0.999071534 | Tmem41a       | Tmem41a       | TMEM41A | 19.51004932 | 13.39955004 | 12.2522801  | 16.23541293 | 12.9497072  | 17.3901566  | 17.47312924 | 9.464295978 | 6.521198373 | 12.87571601 |
| ENSMUSG000000020895 | -0.140513628 | 3.978311665  | 0.268256566 | 0.604503688 | 0.999071534 | Tmem107       | Tmem107       | TMEM107 | 21.40491023 | 15.8897319  | 16.62809442 | 15.81912029 | 15.43500454 | 15.42557824 | 19.22044216 | 14.85272726 | 10.05678785 | 12.61428015 |
| ENSMUSG000000042472 | 0.114133378  | 4.814959876  | 0.268254587 | 0.60450502  | 0.999071534 | Zfp410        | Zfp410        | ZNF410  | 27.30003305 | 29.17070185 | 28.94769475 | 26.4345826  | 27.86149124 | 33.68888078 | 35.26983495 | 27.63298096 | 21.21353688 | 23.92138101 |
| ENSMUSG000000036114 | -0.129948296 | 4.578541744  | 0.268210668 | 0.604534604 | 0.999071534 | Rpp25l        | Rpp25l        | RPP25L  | 27.30003305 | 18.14275359 | 26.99540836 | 32.33206165 | 23.47951961 | 24.88465924 | 23.03864448 | 18.23776743 | 18.85647722 | 24.64032962 |
| ENSMUSG000000035575 | 0.110012884  | 5.618285323  | 0.268181316 | 0.604554378 | 0.999071534 | Utp6          | Utp6          | UTP6    | 46.52936224 | 50.3372477  | 45.03722741 | 49.40005986 | 53.3030877  | 72.98044801 | 60.96180646 | 35.92287524 | 34.88484826 | 46.33950583 |
| ENSMUSG000000032399 | -0.128645418 | 10.0778785   | 0.268130679 | 0.604588494 | 0.999071534 | Rpl4          | Rpl4          | RPL4    | 1121.476936 | 1132.558428 | 1274.03517  | 1128.430581 | 1202.03368  | 1154.29893  | 1001.598597 | 996.4452933 | 698.8681871 | 1177.703181 |
| ENSMUSG000000002797 | 0.236246179  | 1.915814967  | 0.268087389 | 0.604617663 | 0.999071534 | Ggct          | Ggct          | GGCT    | 2.737021308 | 2.01586151  | 4.712415424 | 4.093544286 | 3.727946011 | 5.311637791 | 3.753487022 | 1.796143762 | 4.16413872  | 4.052255799 |
| ENSMUSG000000003316 | -0.137622051 | 7.780673835  | 0.268085626 | 0.604618851 | 0.999071534 | Glg1          | Glg1          | GLG1    | 182.3979072 | 268.8803514 | 238.2462598 | 256.9219406 | 245.9790342 | 236.7680736 | 133.4429352 | 223.5508159 | 199.7212513 | 210.2597888 |
| ENSMUSG000000026878 | 0.120830272  | 7.460018749  | 0.268065301 | 0.604632547 | 0.999071534 | Rab14         | Rab14         | RAB14   | 174.3973834 | 181.605406  | 169.6469553 | 161.3133977 | 189.1442081 | 207.8087333 | 165.2828595 | 165.7288033 | 169.944001  | 173.2012559 |
| ENSMUSG000000038205 | 0.1524398    | 4.109087933  | 0.267971937 | 0.60469547  | 0.999071534 | Prkab2        | Prkab2        | PRKAB2  | 12.91312617 | 20.09932505 | 17.50325729 | 16.44355925 | 17.13547114 | 13.38823772 | 11.71346812 | 22.10638477 | 17.04939816 | 20.91486864 |
| ENSMUSG000000020368 | 0.140728987  | 9.425603593  | 0.267630988 | 0.604925371 | 0.999071534 | Canx          | Canx          | CANX    | 648.0424297 | 864.0338171 | 513.0473992 | 642.9639814 | 732.0508719 | 907.707965  | 966.5229081 | 487.9984437 | 523.1101056 | 646.400159  |
| ENSMUSG000000033488 | -0.227403698 | 2.565481989  | 0.267586731 | 0.604955227 | 0.999071534 | BC026585      | BC026585      |         | 11.22880537 | 4.743203553 | 5.85685917  | 6.591300122 | 3.989556257 | 9.459080998 | 7.377543457 | 3.108710358 | 4.00700141  | 2.61435858  |
| ENSMUSG000000097081 | 0.271680185  | 0.988136689  | 0.267571027 | 0.604965821 | 0.999071534 | Gm10425       | Gm10425       |         | 1.333420637 | 1.185800888 | 2.423527932 | 2.22022741  | 1.504258917 | 2.255627007 | 1.941458804 | 1.381649048 | 2.514196963 | 1.568615148 |
| ENSMUSG000000028899 | 0.121084899  | 5.382570727  | 0.267483937 | 0.605024584 | 0.999071534 | Taf12         | Taf12         | TAF12   | 43.7221609  | 25.61329918 | 44.36402521 | 45.16775136 | 47.61306484 | 43.94834556 | 51.38394302 | 34.19581393 | 38.02722907 | 40.78399385 |
| ENSMUSG000000018199 | 0.113563275  | 5.691124736  | 0.267223225 | 0.605200568 | 0.999071534 | Trove2        | Trove2        | TROVE2  | 39.72189898 | 56.50341232 | 50.08624393 | 45.5146619  | 65.59876928 | 54.78990763 | 47.30687953 | 65.49016487 | 44.31272148 | 45.4898393  |
| ENSMUSG000000033102 | 0.16530136   | 3.756407544  | 0.267180514 | 0.605229409 | 0.999071534 | Cdc14b        | Cdc14b        | CDC14B  | 8.211063924 | 12.33232924 | 12.31960032 | 18.31687613 | 13.7999405  | 11.20537287 | 11.38989165 | 18.09960253 | 12.64955347 | 13.79074151 |
| ENSMUSG000000098975 | -0.363517392 | 0.341864954  | 0.267141901 | 0.605255485 | 0.999071534 | RP23-103l12.3 | Gm27177       |         | 1.754500839 | 0.889350666 | 1.750325729 | 0.624438959 | 1.63506404  | 0.727621615 | 2.588611739 | 0.759906976 | 0.392843275 | 0.326794823 |
| ENSMUSG000000032744 | 0.578662124  | -0.572348108 | 0.267125562 | 0.60526652  | 0.999071534 | Heyl          | Heyl          | HEYL    | 0.210540101 | 0.5336104   | 0.942483085 | 0           | 0.523220493 | 1.45524323  | 1.68259763  | 0.069082452 | 0           | 0.130717929 |
| ENSMUSG000000040236 | 0.114543094  | 4.975023592  | 0.266987482 | 0.605359791 | 0.999071534 | Trappc5       | Trappc5       | TRAPPC5 | 30.80903472 | 23.00453723 | 34.93919436 | 30.59750899 | 36.75623962 | 35.50793482 | 29.12188207 | 32.33058772 | 28.59899046 | 31.17622607 |
| ENSMUSG000000034429 | -0.193565858 | 2.943749399  | 0.266863486 | 0.605443575 | 0.999071534 | Zfp707        | Zfp707        | ZNF707  | 7.860163757 | 6.166164618 | 7.87646578  | 12.00310443 | 7.652099707 | 11.20537287 | 4.530070544 | 8.497141644 | 5.499805857 | 4.967281302 |

|                     |              |              |             |             |             |               |               |         |             |             |             |             |             |             |             |             |             |             |
|---------------------|--------------|--------------|-------------|-------------|-------------|---------------|---------------|---------|-------------|-------------|-------------|-------------|-------------|-------------|-------------|-------------|-------------|-------------|
| ENSMUSG00000028197  | -0.204941559 | 2.405228296  | 0.266821977 | 0.605471628 | 0.999071534 | Col24a1       | Col24a1       | COL24A1 | 5.193322482 | 6.818355107 | 6.193460271 | 4.301690606 | 6.278645913 | 4.365729691 | 5.889091707 | 4.90485412  | 2.042785033 | 6.209101628 |
| ENSMUSG000000095432 | 0.200893995  | 2.948182958  | 0.266704985 | 0.60555071  | 0.999071534 | Zfp748        | Zfp748        |         | 9.053224327 | 9.130666839 | 4.779735644 | 4.371072713 | 9.614176555 | 9.968416129 | 12.8783434  | 4.835771668 | 5.028393926 | 7.189486096 |
| ENSMUSG000000066478 | 0.487693122  | -0.285144596 | 0.266571766 | 0.605640787 | 0.999071534 | Gm5745        | Gm5745        |         | 0.421080201 | 0.059290044 | 0.942483085 | 1.387642131 | 0.130805123 | 0.145524323 | 0.19414588  | 1.174401691 | 0.864255206 | 1.372538255 |
| ENSMUSG000000083992 | 0.30355235   | 1.759793223  | 0.266556571 | 0.605651063 | 0.999071534 | Gm11478       | Gm11478       |         | 5.614402683 | 1.719411288 | 0.875162864 | 5.481186417 | 1.308051232 | 1.600767553 | 3.753487022 | 2.970545453 | 3.614158135 | 4.901922338 |
| ENSMUSG000000037001 | -0.22764006  | 1.849413232  | 0.266389529 | 0.605764055 | 0.999071534 | Zfp39         | Zfp39         |         | 2.526481208 | 5.336103997 | 4.981696305 | 2.983430582 | 3.597140888 | 3.419821592 | 3.624056435 | 2.694215643 | 1.807079067 | 4.052255799 |
| ENSMUSG00000097697  | -0.488743196 | -0.381483734 | 0.266300617 | 0.605824215 | 0.999071534 | 4833412C05Rik | 4833412C05Rik |         | 0           | 0.237160178 | 0.471241542 | 1.942698983 | 1.111843547 | 0.218286485 | 0.582437641 | 0.690824524 | 0.235705965 | 0.784307574 |
| ENSMUSG000000051065 | -0.277253841 | 1.992616378  | 0.26618828  | 0.605900244 | 0.999071534 | Mb21d2        | Mb21d2        | MB21D2  | 4.772242281 | 5.039653775 | 2.154247051 | 5.61995063  | 4.185763942 | 6.257545891 | 6.406814054 | 0.898071881 | 1.021392516 | 3.137230296 |
| ENSMUSG000000069755 | 0.339057692  | 0.755415917  | 0.266062487 | 0.605985404 | 0.999071534 | Zfp125        | Zfp125        |         | 2.17558104  | 0.889350666 | 1.548365068 | 0.416292639 | 2.158284533 | 3.128772945 | 1.812028217 | 0.621742072 | 0.392843275 | 2.875794438 |
| ENSMUSG000000050410 | 0.180056358  | 4.495475306  | 0.265782403 | 0.606175108 | 0.999071534 | Tcf19         | Tcf19         | TCF19   | 34.45839647 | 14.2889007  | 22.55227381 | 14.77838869 | 23.80653242 | 46.42225905 | 31.7104938  | 9.671543335 | 17.44224143 | 14.64040805 |
| ENSMUSG000000035620 | 0.127862162  | 4.127128946  | 0.265668595 | 0.606252228 | 0.999071534 | Ric8b         | Ric8b         | RIC8B   | 16.63266795 | 20.51435536 | 17.43593707 | 14.77838869 | 16.80845833 | 22.04693494 | 16.43768454 | 18.09960253 | 12.33527885 | 19.54233039 |
| ENSMUSG000000042684 | 0.270156627  | 4.936389996  | 0.265616913 | 0.606287256 | 0.999071534 | Npl           | Npl           | NPL     | 47.09080251 | 35.15899633 | 14.94508892 | 19.01069719 | 28.45011429 | 71.74349126 | 76.29933101 | 7.806317121 | 6.992610304 | 11.045665   |
| ENSMUSG000000004864 | 0.146453992  | 4.610317416  | 0.26538027  | 0.606447699 | 0.999071534 | Mapk13        | Mapk13        | MAPK13  | 24.00157147 | 24.19033812 | 22.28299293 | 24.14497308 | 25.04918109 | 13.82481069 | 22.45620684 | 29.70545453 | 19.48502646 | 35.3591998  |
| ENSMUSG000000063160 | -0.141037075 | 5.278991338  | 0.265338769 | 0.606475846 | 0.999071534 | Numbl         | Numbl         | NUMBL   | 36.77433758 | 46.30552468 | 40.99801419 | 37.74386596 | 49.18272632 | 32.59744836 | 21.29133155 | 54.02247777 | 21.13496822 | 48.75778752 |
| ENSMUSG000000070394 | 0.182656942  | 7.321158453  | 0.265333043 | 0.606479729 | 0.999071534 | Tmem256       | Tmem256       | TMEM256 | 175.9413441 | 100.081595  | 155.3077483 | 234.1646096 | 103.7284627 | 81.20257226 | 148.7804597 | 147.2147061 | 229.6561789 | 171.5019229 |
| ENSMUSG000000004567 | -0.128305215 | 5.4244046    | 0.265320076 | 0.606488524 | 0.999071534 | Mcoln1        | Mcoln1        | MCOLN1  | 43.37126073 | 56.68128245 | 37.90128405 | 42.11493868 | 52.51825696 | 42.49310233 | 31.83992439 | 57.06210568 | 21.05639957 | 47.12381341 |
| ENSMUSG000000039850 | -0.169223511 | 3.225553555  | 0.265277368 | 0.606517494 | 0.999071534 | Endov         | Endov         | ENDOY   | 12.70258607 | 9.901437416 | 11.44443746 | 8.395234892 | 8.306125323 | 11.3508972  | 6.147952881 | 6.493750525 | 0.892571475 | 9.999921569 |
| ENSMUSG000000040888 | 0.132504851  | 4.638714257  | 0.265257952 | 0.606530665 | 0.999071534 | Gfer          | Gfer          | GFER    | 29.33525402 | 20.09932505 | 25.51436351 | 21.78598146 | 26.2264272  | 29.39591325 | 36.30527964 | 18.23776743 | 23.17757525 | 18.10443317 |
| ENSMUSG000000082938 | 0.20724819   | 4.38256938   | 0.265146242 | 0.606606457 | 0.999071534 | Gm2810        | Gm2810        |         | 11.9306057  | 16.60121243 | 25.91828483 | 26.78149313 | 17.78949675 | 8.440410737 | 10.22501637 | 21.96821986 | 32.13457994 | 28.03899577 |
| ENSMUSG000000058192 | 0.215129245  | 1.901368589  | 0.265105637 | 0.606634012 | 0.999071534 | Zfp846        | Zfp846        |         | 2.947561409 | 3.320242487 | 3.837252559 | 3.399723221 | 3.793348573 | 4.365729691 | 2.912188207 | 5.18118393  | 2.671334273 | 3.660102012 |
| ENSMUSG000000028833 | 0.160118754  | 3.96114945   | 0.265041048 | 0.606677848 | 0.999071534 | Ncdn          | Ncdn          | NCDN    | 13.82546661 | 19.44713457 | 13.06012275 | 11.58681179 | 18.11650956 | 33.25230782 | 11.13103048 | 11.39860464 | 11.78529826 | 14.50969012 |
| ENSMUSG000000035505 | 0.139376644  | 4.083675296  | 0.264982942 | 0.606717289 | 0.999071534 | Cox18         | Cox18         | COX18   | 12.70258607 | 13.93316044 | 20.86926831 | 19.98204669 | 15.17339429 | 21.53759981 | 16.56711513 | 14.09282029 | 13.67094599 | 19.9984314  |
| ENSMUSG000000017802 | -0.135616195 | 5.590528053  | 0.264884685 | 0.606783996 | 0.999071534 | Fam134c       | Fam134c       | FAM134C | 65.40779126 | 65.10046876 | 30.83266092 | 44.61269451 | 56.3770081  | 66.35909131 | 60.96180646 | 40.89681182 | 20.74212495 | 39.67289145 |
| ENSMUSG000000068566 | -0.141811264 | 7.638155509  | 0.264780316 | 0.606854871 | 0.999071534 | Myadm         | Myadm         | MYADM   | 203.4519172 | 280.6197802 | 195.4305997 | 159.7869914 | 250.033993  | 285.5187218 | 247.406567  | 170.0119153 | 106.5390963 | 132.8094159 |
| ENSMUSG000000038722 | 0.140276461  | 6.779174766  | 0.264652294 | 0.606941831 | 0.999071534 | Bud31         | Bud31         | BUD31   | 143.1672684 | 84.13257301 | 101.7881732 | 100.6040545 | 113.1464316 | 97.13748563 | 196.7344922 | 91.74149678 | 78.88292972 | 90.97967859 |
| ENSMUSG000000005609 | -0.11708079  | 5.328051851  | 0.264384237 | 0.607123998 | 0.999071534 | Ctr9          | Ctr9          | CTR9    | 44.3537812  | 45.65333419 | 38.03592449 | 40.72729654 | 47.80927253 | 65.84975618 | 29.63960441 | 27.90931077 | 27.42046063 | 40.39184006 |
| ENSMUSG000000084319 | -0.447117478 | 9.202261777  | 0.264367117 | 0.607135636 | 0.999071534 | Tpt1-ps3      | Tpt1-ps3      |         | 851.2136268 | 1051.034617 | 320.9828106 | 423.2308499 | 915.4396547 | 492.0177362 | 1047.740601 | 573.1080251 | 0           | 389.9969412 |
| ENSMUSG000000032462 | 0.121920888  | 5.023044894  | 0.264359623 | 0.607140731 | 0.999071534 | Pik3cb        | Pik3cb        | PIK3CB  | 31.23011493 | 40.13936006 | 27.53397012 | 21.64721724 | 41.46522405 | 52.60704278 | 28.66887501 | 31.15618603 | 25.45624425 | 28.62722645 |
| ENSMUSG000000080888 | -0.40159624  | 0.929985502  | 0.264241687 | 0.60722092  | 0.999071534 | Rmrp          | Rmrp          |         | 2.666841275 | 0.830060622 | 1.077123525 | 5.064893778 | 0.719428178 | 0.363810808 | 0.517722348 | 0.690824524 | 4.00700141  | 1.045743432 |
| ENSMUSG000000086414 | 0.249470588  | 1.636290901  | 0.264098633 | 0.607318218 | 0.999071534 | Gm15645       | Gm15645       |         | 3.719541778 | 1.660121243 | 3.433331237 | 2.289609516 | 3.073920395 | 3.128772945 | 4.335924663 | 1.72706131  | 3.928432755 | 2.222204793 |
| ENSMUSG000000021371 | 0.128018147  | 4.264099229  | 0.264054408 | 0.607348305 | 0.999071534 | Mcur1         | Mcur1         | MCUR1   | 17.89590855 | 21.28512594 | 19.32090324 | 14.98653501 | 21.4520402  | 25.75780518 | 15.46695514 | 22.58996193 | 15.63516236 | 17.58156145 |
| ENSMUSG000000035530 | 0.146114926  | 9.795878131  | 0.26392928  | 0.607433446 | 0.999071534 | Elf1          | Elf1          | EIF1    | 711.2746399 | 976.8627717 | 872.5373758 | 879.765111  | 936.3030718 | 621.6071459 | 772.2475971 | 1094.058799 | 893.2470398 | 1012.802514 |
| ENSMUSG000000073409 | -0.139039105 | 6.394292896  | 0.263885419 | 0.607463297 | 0.999071534 | H2-Q6         | H2-Q6         |         | 104.4980699 | 84.90334359 | 98.01824082 | 75.27958561 | 95.48773993 | 107.2514261 | 32.87536909 | 104.3835856 | 60.49786443 | 84.705218   |
| ENSMUSG000000038524 | -0.190110818 | 3.428705188  | 0.263778993 | 0.607535742 | 0.999071534 | Fchsd1        | Fchsd1        | FCHSD1  | 9.895384729 | 17.13482283 | 9.963392611 | 6.868828548 | 15.36960198 | 8.076599929 | 5.241938772 | 13.67832557 | 10.05678785 | 9.803844676 |
| ENSMUSG000000030411 | -0.272066537 | 1.359743302  | 0.263777449 | 0.607536793 | 0.999071534 | Nova2         | Nova2         | NOVA2   | 2.947561409 | 1.363671021 | 3.769932339 | 3.81601586  | 1.831271725 | 2.255627007 | 1.48845175  | 1.657978857 | 3.299883514 | 1.633974113 |
| ENSMUSG000000049999 | -0.26920334  | 1.374630763  | 0.263727786 | 0.607570605 | 0.999071534 | Ppp1r3d       | Ppp1r3d       | PPP1R3D | 3.859901845 | 2.312311732 | 2.962089695 | 2.844666369 | 1.962076848 | 4.147443207 | 2.847472913 | 0.828989429 | 2.121353688 | 1.111102397 |
| ENSMUSG000000071335 | -0.305982757 | 1.077371578  | 0.263700114 | 0.607589447 | 0.999071534 | G630090E17Rik | Mfsd4b3       | MFSD4B  | 2.035220973 | 1.185800888 | 1.009803305 | 3.954780073 | 3.073920395 | 0.654859454 | 2.006174098 | 2.694215643 | 1.649941757 | 1.241820326 |
| ENSMUSG000000025584 | -0.138957173 | 3.955122408  | 0.263663541 | 0.607614351 | 0.999071534 | Pde8a         | Pde8a         | PDE8A   | 15.22906728 | 22.23376665 | 13.32940363 | 16.09664872 | 16.80845833 | 16.88082147 | 14.49622574 | 16.78703593 | 9.742513232 | 13.39858772 |
| ENSMUSG000000030987 | -0.259473508 | 3.708847172  | 0.263124974 | 0.607981338 | 0.999071534 | Stim1         | Stim1         | STIM1   | 20.42238976 | 28.34064123 | 5.722218729 | 7.146356975 | 12.29568158 | 26.12161599 | 20.77360921 | 6.010173358 | 4.32127603  | 3.660102012 |
| ENSMUSG000000028389 | 0.41452227   | -0.300523647 | 0.262896731 | 0.60813701  | 0.999071534 | Zfp37         | Zfp37         | ZFP37   | 0.280720134 | 1.007930755 | 0.06732022  | 1.110113705 | 0.523220493 | 0.654859454 | 0.582437641 | 1.243484143 | 0.707117896 | 0.522871716 |

|                    |              |              |             |             |             |               |               |           |             |             |             |             |             |             |             |             |             |             |
|--------------------|--------------|--------------|-------------|-------------|-------------|---------------|---------------|-----------|-------------|-------------|-------------|-------------|-------------|-------------|-------------|-------------|-------------|-------------|
| ENSMUSG00000036333 | -0.111521942 | 5.366763814  | 0.262774592 | 0.608220349 | 0.999071534 | Kidins220     | Kidins220     | KIDINS220 | 42.03784009 | 49.92221739 | 36.28559876 | 38.02139439 | 56.24620297 | 55.66305356 | 33.39309144 | 39.51516277 | 25.3776756  | 40.98007074 |
| ENSMUSG00000039275 | 0.108748302  | 5.661373785  | 0.262685461 | 0.608281181 | 0.999071534 | Foxk2         | Foxk2         | FOXK2     | 58.17924781 | 47.55061561 | 46.18167115 | 47.59612509 | 53.04147745 | 80.47495064 | 59.08506295 | 39.86057503 | 35.19875748 | 45.03232654 |
| ENSMUSG00000083914 | 0.338916327  | 0.31528059   | 0.262508197 | 0.608402203 | 0.999071534 | Rps18-ps1     | Rps18-ps1     |           | 0.912340436 | 2.01586151  | 0.673202203 | 0.416292639 | 1.111843547 | 1.018670261 | 1.48845175  | 1.519813953 | 1.335667137 | 0.522871716 |
| ENSMUSG00000025857 | -0.138895933 | 4.004249338  | 0.262400045 | 0.608476066 | 0.999071534 | Heatr2        | Dnaaf5        | DNAAF5    | 18.80824899 | 15.71186177 | 18.44574037 | 14.91715291 | 18.9013403  | 24.52084843 | 11.13103048 | 13.88557293 | 10.13535651 | 15.49007459 |
| ENSMUSG00000078945 | -0.281031076 | 3.013992002  | 0.262362009 | 0.608502047 | 0.999071534 | Naip2         | Naip2         | NAIP      | 16.98356812 | 15.11896132 | 2.221567271 | 2.150845303 | 9.483371431 | 16.73529715 | 7.44225875  | 3.523205072 | 2.907040239 | 6.470537486 |
| ENSMUSG00000000902 | 0.121544636  | 6.920158705  | 0.262323833 | 0.608528127 | 0.999071534 | Smarcb1       | Smarcb1       | SMARCB1   | 112.8494939 | 100.2594651 | 138.2084124 | 98.24506287 | 153.6960198 | 122.8225286 | 101.9265872 | 140.9972853 | 112.6674514 | 124.4434684 |
| ENSMUSG00000011382 | -0.383166851 | 0.413246454  | 0.262042622 | 0.608720307 | 0.999071534 | Dhdh          | Dhdh          | DHDH      | 2.105401006 | 2.253021687 | 0.471241542 | 0.832585279 | 1.373453794 | 2.182864846 | 1.29430587  | 0.621742072 | 0           | 1.241820326 |
| ENSMUSG00000045193 | 0.14185237   | 4.585983452  | 0.261977191 | 0.60876504  | 0.999071534 | Cirbp         | Cirbp         | CIRBP     | 31.79155519 | 26.97697021 | 25.91828483 | 13.25198235 | 20.73261203 | 23.28389169 | 19.09101158 | 21.6228076  | 24.51342039 | 30.84943125 |
| ENSMUSG00000029414 | 0.147647838  | 4.496108642  | 0.261964993 | 0.608773381 | 0.999071534 | Kntc1         | Kntc1         | KNTC1     | 22.87869093 | 16.77908257 | 21.47515029 | 20.32895722 | 29.30034759 | 45.25806447 | 24.72124211 | 12.64208879 | 17.83508471 | 17.77763835 |
| ENSMUSG00000027387 | -0.247539647 | 2.25314207   | 0.261921478 | 0.608803136 | 0.999071534 | Zc3h8         | Zc3h8         | ZC3H8     | 5.684582717 | 3.379532531 | 3.298690797 | 7.215739081 | 6.409451036 | 7.203453991 | 5.889091707 | 3.039627905 | 0.785686551 | 4.64048648  |
| ENSMUSG00000036572 | 0.208667914  | 6.397703769  | 0.261883226 | 0.608829296 | 0.999071534 | Upf3b         | Upf3b         | UPF3B     | 42.95018053 | 40.25794015 | 132.9574352 | 111.98272   | 72.92385618 | 61.62955081 | 30.41618794 | 76.88876951 | 122.0171214 | 125.7506477 |
| ENSMUSG00000004151 | -0.107347977 | 5.683267162  | 0.26186764  | 0.608839955 | 0.999071534 | Etv1          | Etv1          | ETV1      | 56.00366677 | 60.29797516 | 50.49016526 | 55.71383156 | 53.23768514 | 51.4428482  | 41.48250312 | 57.33843549 | 45.25554534 | 40.78399385 |
| ENSMUSG00000038312 | -0.110744393 | 5.705631884  | 0.261667266 | 0.608977028 | 0.999071534 | Edem2         | Edem2         | EDEM2     | 53.40700553 | 69.36935196 | 47.25879468 | 54.60371785 | 56.04999529 | 49.551032   | 44.84769838 | 58.44375473 | 32.29171725 | 57.4505298  |
| ENSMUSG00000038611 | 0.114543211  | 5.381440138  | 0.261366006 | 0.60918324  | 0.999071534 | Phrf1         | Phrf1         | PHRF1     | 36.70415754 | 43.51889259 | 41.40193551 | 39.61718284 | 45.91259824 | 54.42609682 | 26.72741621 | 45.11084141 | 40.22715141 | 42.09117314 |
| ENSMUSG00000001039 | 0.164716684  | 4.018313471  | 0.261202472 | 0.609295242 | 0.999071534 | B9d1          | B9d1          | B9D1      | 21.7558104  | 12.03587901 | 13.59868451 | 16.929234   | 14.32316099 | 10.33222694 | 26.85684679 | 17.2706131  | 10.52819978 | 16.40510009 |
| ENSMUSG00000066571 | -0.14937523  | 4.179092842  | 0.260799829 | 0.609571194 | 0.999071534 | 4931406P16Rik | 4931406P16Rik | KIAA0355  | 20.98383003 | 26.79910007 | 13.93528561 | 14.8477708  | 22.10606582 | 32.23363755 | 14.75508691 | 15.33630443 | 11.15674902 | 12.09140843 |
| ENSMUSG00000014867 | -0.135858    | 7.878011069  | 0.260749869 | 0.609605453 | 0.999071534 | Surf4         | Surf4         | SURF4     | 277.2111325 | 311.7470535 | 239.3907035 | 190.800793  | 264.357154  | 310.839954  | 295.5547453 | 181.1341902 | 151.8732103 | 164.9660264 |
| ENSMUSG00000099291 | -0.485139138 | 0.24692081   | 0.260642817 | 0.609678875 | 0.999071534 | ACEA_U3       | Rnu3b3        |           | 2.105401006 | 0.711480533 | 0.875162864 | 2.567137942 | 0           | 0.509335131 | 0.970729402 | 1.105319238 | 0           | 1.699333077 |
| ENSMUSG00000098943 | -0.485139674 | 0.24692081   | 0.260630911 | 0.609687041 | 0.999071534 | ACEA_U3       | Rnu3b1        |           | 2.105401006 | 0.711480533 | 0.875162864 | 2.567137942 | 0           | 0.509335131 | 0.970729402 | 1.105319238 | 0           | 1.699333077 |
| ENSMUSG00000033508 | -0.314583498 | 0.988447707  | 0.260628668 | 0.60968858  | 0.999071534 | Asprv1        | Asprv1        | ASPRV1    | 2.947561409 | 2.905212176 | 3.164050356 | 0.555056852 | 1.177246109 | 0.800383777 | 1.747312924 | 1.105319238 | 2.592765618 | 1.30717929  |
| ENSMUSG00000042249 | -0.218144517 | 2.501692592  | 0.260517215 | 0.609765044 | 0.999071534 | Adrbk2        | Adrbk2        | GRK3      | 10.10592483 | 4.743203553 | 7.203263577 | 4.440454819 | 4.51277675  | 9.604605321 | 5.500799946 | 2.901463001 | 2.278490998 | 5.620870947 |
| ENSMUSG00000031987 | -0.169363798 | 7.023932494  | 0.260503659 | 0.609774345 | 0.999071534 | Egln1         | Egln1         | EGLN1     | 97.62042666 | 203.0684021 | 131.4763903 | 113.4397442 | 171.0931011 | 85.42277763 | 58.04961825 | 202.1352557 | 105.5177038 | 126.0774425 |
| ENSMUSG00000015533 | 0.383770748  | 1.733748766  | 0.260500299 | 0.609776651 | 0.999071534 | Itga2         | Itga2         | ITGA2     | 4.421342113 | 5.158233863 | 1.683005509 | 1.040731598 | 2.158284533 | 9.09527019  | 7.765835218 | 0.759906976 | 0.078568655 | 1.437897219 |
| ENSMUSG00000041923 | -0.270735379 | 1.605699236  | 0.260481579 | 0.609789496 | 0.999071534 | Nol4          | Nol4          | NOL4      | 1.19306057  | 3.557402664 | 4.577774983 | 2.01208109  | 5.232204928 | 4.29296753  | 3.17104938  | 1.312566595 | 2.749902928 | 1.372538255 |
| ENSMUSG00000030867 | -0.162907324 | 5.309060802  | 0.260452756 | 0.609809276 | 0.999071534 | Plk1          | Plk1          | PLK1      | 46.59954227 | 22.47092683 | 56.95290641 | 35.93993119 | 55.26516455 | 86.87802086 | 31.19277146 | 22.03730231 | 23.33489056 | 27.45076509 |
| ENSMUSG00000030614 | -0.191439399 | 3.710977239  | 0.260271073 | 0.609933985 | 0.999071534 | Tmem126b      | Tmem126b      | TMEM126B  | 16.00104765 | 14.58535092 | 7.674505119 | 17.76181928 | 15.56580966 | 14.62519447 | 23.62108212 | 8.773471454 | 4.792687961 | 8.300588492 |
| ENSMUSG00000087060 | 0.225147384  | 2.489589597  | 0.260242237 | 0.609953784 | 0.999071534 | 2810442I21Rik | Eldr          |           | 4.772242281 | 2.371601776 | 5.250977187 | 7.423885401 | 6.278645913 | 4.729540499 | 6.406814054 | 2.832380548 | 6.914041649 | 6.993409202 |
| ENSMUSG00000056656 | -0.528068843 | -0.193247688 | 0.260196993 | 0.60998485  | 0.999071534 | Apol8         | Apol8         |           | 0           | 0           | 1.683005509 | 1.526406344 | 1.308051232 | 0.654859454 | 0.129430587 | 0.690824524 | 0.864255206 | 0.522871716 |
| ENSMUSG00000050628 | -0.11387127  | 5.716623318  | 0.26016825  | 0.610004589 | 0.999071534 | Ubald2        | Ubald2        | UBALD2    | 66.67103186 | 39.30929944 | 56.68362553 | 64.24783066 | 55.46137223 | 50.06036713 | 59.53807    | 54.09156022 | 35.98444403 | 43.92122415 |
| ENSMUSG00000032010 | 0.261287049  | 1.284857732  | 0.260070233 | 0.610071908 | 0.999071534 | Usp2          | Usp2          | USP2      | 2.737021308 | 1.897281421 | 3.096730136 | 1.734552664 | 1.438856355 | 3.34705943  | 1.100159989 | 2.003391119 | 3.064177549 | 2.548999616 |
| ENSMUSG00000044217 | -0.162360024 | 3.645711135  | 0.259989252 | 0.610127539 | 0.999071534 | Aqp5          | Aqp5          | AQP5      | 17.40464832 | 15.3561215  | 11.71371834 | 10.19916966 | 13.53833025 | 10.69603774 | 14.23736457 | 16.51070612 | 6.442629718 | 8.758101244 |
| ENSMUSG00000021466 | -0.137967077 | 4.096192131  | 0.259945545 | 0.610157569 | 0.999071534 | Ptch1         | Ptch1         | PTCH1     | 17.75554849 | 24.01246798 | 15.07972936 | 18.10872981 | 17.33167882 | 22.62903223 | 15.79053161 | 17.2706131  | 12.80669078 | 10.52279329 |
| ENSMUSG00000027665 | 0.14495428   | 6.813888982  | 0.259723411 | 0.610310239 | 0.999071534 | Plk3ca        | Plk3ca        | PIK3CA    | 74.32065552 | 97.17638278 | 140.2953392 | 139.31927   | 99.01947826 | 118.9661341 | 65.491877   | 114.676871  | 135.1380868 | 123.6591608 |
| ENSMUSG00000026988 | -0.162568425 | 3.290748519  | 0.259600392 | 0.610394824 | 0.999071534 | Wdsub1        | Wdsub1        | WDSUB1    | 13.05348624 | 13.51813012 | 8.347707322 | 8.672763319 | 9.483371431 | 11.56918368 | 8.671849326 | 7.668152216 | 8.799689371 | 7.320204025 |
| ENSMUSG00000024480 | 0.144694096  | 7.015249003  | 0.259557932 | 0.610424024 | 0.999071534 | Ap3s1         | Ap3s1         | AP3S1     | 92.98854444 | 125.8134742 | 130.7358679 | 149.5184396 | 135.5795102 | 83.89477224 | 110.2748601 | 188.8023424 | 123.5099258 | 131.5022366 |
| ENSMUSG00000033458 | 0.279023429  | 1.261218456  | 0.259496367 | 0.610466369 | 0.999071534 | Fan1          | Fan1          | FAN1      | 4.140621979 | 2.134441599 | 1.413724627 | 1.457024238 | 1.569661478 | 2.255627007 | 1.812028217 | 1.036236786 | 3.221314859 | 3.398666154 |
| ENSMUSG00000032051 | 0.128420251  | 4.593124634  | 0.259355379 | 0.610563365 | 0.999071534 | Fdx1          | Fdx1          | FDX1      | 29.54579412 | 20.04003501 | 22.28299293 | 22.68794884 | 24.65676572 | 21.24655116 | 29.96318088 | 29.56728962 | 18.5422026  | 20.98022761 |
| ENSMUSG00000038619 | -0.128601772 | 6.561624384  | 0.259322808 | 0.610585777 | 0.999071534 | Ensa          | Ensa          | ENSA      | 132.0086431 | 135.1220112 | 76.13916921 | 74.03070769 | 97.05740141 | 109.8708639 | 128.3951423 | 70.8095137  | 61.91210022 | 70.32624581 |
| ENSMUSG00000024002 | 0.173729274  | 6.811171897  | 0.259046219 | 0.610776174 | 0.999071534 | Brd4          | Brd4          | BRD4      | 66.3201317  | 87.57139559 | 152.4129789 | 127.5936939 | 110.2033163 | 98.08339373 | 41.676649   | 134.2962875 | 132.7024585 | 151.3060028 |

|                    |              |             |             |             |             |               |               |            |             |             |             |             |             |             |             |             |             |             |
|--------------------|--------------|-------------|-------------|-------------|-------------|---------------|---------------|------------|-------------|-------------|-------------|-------------|-------------|-------------|-------------|-------------|-------------|-------------|
| ENSMUSG00000028651 | 0.113957288  | 4.876164015 | 0.258986531 | 0.610817278 | 0.999071534 | Ppie          | Ppie          | PPIE       | 33.96713623 | 28.87425163 | 29.75553739 | 23.38176991 | 30.28138602 | 37.47251318 | 37.85844669 | 25.56050739 | 22.54920401 | 24.90176548 |
| ENSMUSG00000027010 | -0.185151511 | 4.300775021 | 0.258960283 | 0.610835356 | 0.999071534 | Slc25a12      | Slc25a12      | SLC25A12   | 31.01957483 | 28.34064123 | 15.41633046 | 14.29271395 | 19.81697616 | 36.96317805 | 24.39766564 | 7.737234668 | 6.914041649 | 17.97371524 |
| ENSMUSG00000027646 | -0.137918704 | 5.780959899 | 0.258893544 | 0.610881326 | 0.999071534 | Src           | Src           | SRC        | 66.3201317  | 92.2553091  | 50.08624393 | 34.34414274 | 57.5542542  | 87.53288031 | 41.676649   | 56.50944606 | 25.3776576  | 50.91463335 |
| ENSMUSG00000027248 | 0.130864741  | 10.03732376 | 0.258892312 | 0.610882174 | 0.999071534 | Pdia3         | Pdia3         | PDI A3     | 987.2927119 | 1065.323518 | 982.1346496 | 1029.699843 | 1143.171374 | 1073.896742 | 1398.626923 | 1128.530942 | 750.9592054 | 967.0512388 |
| ENSMUSG00000068798 | 0.134179987  | 7.678143658 | 0.258877346 | 0.610892484 | 0.999071534 | Rap1a         | Rap1a         | RAP1A      | 190.1878909 | 171.9411288 | 224.9841764 | 217.7904325 | 205.8872639 | 172.082512  | 278.4699078 | 199.4410401 | 188.4862036 | 181.8939982 |
| ENSMUSG00000091639 | -0.574220609 | 1.098550511 | 0.258800504 | 0.610945424 | 0.999071534 | Gm3756        | Gm3756        |            | 8.140883891 | 1.363671021 | 0.673202203 | 1.318260024 | 1.046440986 | 6.985167506 | 2.070889391 | 0           | 0           | 0           |
| ENSMUSG00000016018 | 0.137602727  | 5.419383497 | 0.258651779 | 0.611047917 | 0.999071534 | Skiv2l2       | Skiv2l2       | SKIV2L2    | 49.05584345 | 50.69298797 | 33.25618885 | 28.72419211 | 50.62158268 | 71.01586965 | 64.84472407 | 28.8764651  | 26.55620542 | 31.89517468 |
| ENSMUSG00000058793 | -0.11912042  | 6.13588816  | 0.258583179 | 0.611095205 | 0.999071534 | Cds2          | Cds2          | CDS2       | 75.02245586 | 111.0502532 | 57.89538949 | 56.1995063  | 81.09917638 | 81.05704794 | 76.55819219 | 69.42786466 | 39.44146486 | 63.79034936 |
| ENSMUSG00000024235 | -0.246581745 | 1.805945709 | 0.258567791 | 0.611105813 | 0.999071534 | Map3k8        | Map3k8        | MAP3K8     | 4.000261912 | 6.106874574 | 3.029409915 | 3.260959008 | 2.550699902 | 2.473913492 | 1.48845175  | 5.043019025 | 2.592765618 | 3.006512367 |
| ENSMUSG00000020087 | -0.120154591 | 4.692703509 | 0.258551581 | 0.611116988 | 0.999071534 | Tysnd1        | Tysnd1        | TYSND1     | 38.38847835 | 24.90181865 | 22.21567271 | 25.18570468 | 28.84252966 | 35.72622131 | 23.23279036 | 20.79381817 | 18.30649664 | 23.2024324  |
| ENSMUSG00000034949 | 0.387904516  | 0.300171917 | 0.258493907 | 0.611156754 | 0.999071534 | Zfr2          | Zfr2          | ZFR2       | 0.561440268 | 1.304380977 | 1.750325729 | 0.485674746 | 0.850233301 | 0.509335131 | 0.19414588  | 2.970545453 | 0.707117896 | 1.503256184 |
| ENSMUSG00000027993 | 0.149175821  | 5.608061281 | 0.258366567 | 0.611244572 | 0.999071534 | Trim2         | Trim2         | TRIM2      | 37.26559781 | 34.9811262  | 55.9431031  | 60.3624327  | 49.44433657 | 49.40550767 | 25.30367975 | 40.41323465 | 66.94049414 | 57.64660669 |
| ENSMUSG00000047139 | -0.135531307 | 6.611302787 | 0.258362176 | 0.611247601 | 0.999071534 | Cd24a         | Cd24a         | CD24       | 119.7973173 | 103.0460972 | 94.92151068 | 79.442512   | 136.3643409 | 106.9603774 | 114.2872083 | 109.0121099 | 33.70595304 | 96.6659085  |
| ENSMUSG00000091449 | 0.336906811  | 1.95615844  | 0.258312853 | 0.611281624 | 0.999071534 | Gm10269       | Gm10269       | RPL35      | 5.824942784 | 3.853852886 | 5.183656966 | 1.734552664 | 0.654025616 | 1.236956746 | 10.9368846  | 4.973936572 | 1.099961171 | 1.895409971 |
| ENSMUSG00000074923 | -0.199130426 | 3.100147159 | 0.258280415 | 0.611304002 | 0.999071534 | Pak6          | Pak6          | BUB1B-PAK6 | 12.49204597 | 4.683913508 | 13.06012275 | 8.811527532 | 7.78290483  | 12.07851881 | 7.312828163 | 4.144947144 | 4.714119306 | 10.84958811 |
| ENSMUSG00000021710 | 0.107691187  | 5.503165811 | 0.2582498   | 0.611325123 | 0.999071534 | Nln           | Nln           | NLN        | 41.26585972 | 38.83497909 | 45.91239027 | 46.41662928 | 53.43389282 | 67.30499941 | 37.79373139 | 46.35432556 | 36.9272679  | 41.4375835  |
| ENSMUSG00000021287 | -0.174748944 | 3.763639031 | 0.25808932  | 0.611435867 | 0.999071534 | Xrcc3         | Xrcc3         | XRCC3      | 15.79050755 | 9.130666839 | 17.09933597 | 17.13738032 | 14.6501738  | 14.47967014 | 20.06174098 | 7.115492597 | 5.656943167 | 15.16327977 |
| ENSMUSG00000097756 | 0.307895919  | 0.909876683 | 0.257821523 | 0.611620763 | 0.999071534 | A730056A06Rik | A730056A06Rik |            | 0.350900168 | 3.320242487 | 1.279084186 | 1.110113705 | 2.027479409 | 3.274297269 | 2.070889391 | 0.967154334 | 1.335667137 | 1.960768935 |
| ENSMUSG00000055313 | -0.44627366  | -0.2998759  | 0.257569159 | 0.611795115 | 0.999071534 | Pgbd1         | Pgbd1         | PGBD1      | 1.543960738 | 1.363671021 | 0.134640441 | 0.485674746 | 0.523220493 | 0.9459081   | 0.841298815 | 0.759906976 | 0           | 0.326794823 |
| ENSMUSG00000022270 | 0.136933602  | 6.524479708 | 0.257510716 | 0.611835507 | 0.999071534 | Fam134b       | Fam134b       | FAM134B    | 68.14481257 | 104.6469284 | 78.96661846 | 97.96753445 | 104.1208781 | 59.95602109 | 82.77086036 | 132.2928963 | 89.64683547 | 87.71173037 |
| ENSMUSG00000051034 | 0.20078002   | 2.179405823 | 0.257128252 | 0.612099984 | 0.999071534 | Zfp11         | Zfp11         |            | 2.807201342 | 4.387463286 | 5.183656966 | 4.717983245 | 4.054958819 | 6.112021568 | 4.012348196 | 3.868617334 | 3.614158135 | 5.359435089 |
| ENSMUSG00000032202 | 0.252727359  | 2.27276708  | 0.257106493 | 0.612115039 | 0.999071534 | Rab27a        | Rab27a        | RAB27A     | 8.070703857 | 5.691844263 | 2.760129034 | 3.607869541 | 2.223687094 | 7.785551283 | 4.46535525  | 1.312566595 | 4.242707375 | 7.385562989 |
| ENSMUSG00000041741 | 0.328945115  | 0.504926434 | 0.257092443 | 0.612124759 | 0.999071534 | Pde3a         | Pde3a         | PDE3A      | 1.754500839 | 1.067220799 | 2.01960661  | 0.416292639 | 0.719428178 | 1.45524323  | 2.070889391 | 0.898071881 | 1.807079067 | 0.588230681 |
| ENSMUSG00000045975 | 0.179724648  | 3.160466842 | 0.257034338 | 0.612164964 | 0.999071534 | C2cd2         | C2cd2         | C2CD2      | 8.983044293 | 8.597056439 | 11.915679   | 4.856747458 | 8.763943254 | 12.80614043 | 9.642578728 | 9.878790692 | 4.085570065 | 10.06528053 |
| ENSMUSG00000074918 | 0.134729275  | 4.242865577 | 0.256917478 | 0.612245842 | 0.999071534 | 5430417L22Rik | Inafm2        |            | 14.03600671 | 17.07553279 | 25.91828483 | 17.41490874 | 18.44352237 | 26.48542679 | 15.46695514 | 17.408778   | 18.22792798 | 17.90835627 |
| ENSMUSG00000030967 | 0.148872145  | 6.222308446 | 0.256792492 | 0.612332369 | 0.999071534 | Zranb1        | Zranb1        | ZRANB1     | 52.77538522 | 54.84329108 | 96.13327465 | 84.57678788 | 76.84800988 | 60.3198319  | 39.86462078 | 95.67919657 | 81.55426399 | 90.97967859 |
| ENSMUSG00000017858 | -0.123528752 | 4.752741741 | 0.256773194 | 0.612345731 | 0.999071534 | Ift52         | Ift52         | IFT52      | 38.17793825 | 29.58573216 | 23.89867822 | 26.15705417 | 27.79608868 | 28.95934029 | 30.67504911 | 27.2875687  | 13.27810271 | 25.81679098 |
| ENSMUSG00000049932 | -0.1605296   | 6.070020932 | 0.256482884 | 0.612546823 | 0.999071534 | H2afx         | H2afx         | H2AFX      | 95.79574578 | 30.41579278 | 92.09406143 | 73.26750452 | 75.67076377 | 115.9101233 | 70.53966989 | 29.22187736 | 46.35550651 | 55.09760708 |
| ENSMUSG00000023017 | -0.251974629 | 1.37738596  | 0.25640908  | 0.612597968 | 0.999071534 | Asic1         | Asic1         | ASIC1      | 4.421342113 | 2.193731643 | 2.827449254 | 1.318260024 | 3.27012808  | 4.074681045 | 1.941458804 | 1.588896405 | 1.414235792 | 2.222204793 |
| ENSMUSG00000034487 | 0.119562245  | 4.989863923 | 0.256389503 | 0.612611536 | 0.999071534 | Kdek2         | Kdek2         | KDEL2      | 26.03679244 | 31.06798327 | 35.67971678 | 30.25059846 | 34.33634484 | 37.47251318 | 43.10038546 | 29.08371246 | 28.28471584 | 21.37238139 |
| ENSMUSG00000071796 | -0.117267455 | 6.782329685 | 0.256356805 | 0.612634199 | 0.999071534 | 6820431F20Rik | 6820431F20Rik |            | 99.7960077  | 137.0785827 | 137.4678899 | 107.3341188 | 112.1653931 | 103.613318  | 82.77086036 | 125.2464862 | 82.10424458 | 113.5938803 |
| ENSMUSG00000026896 | -0.153669405 | 3.999486708 | 0.256274009 | 0.612691595 | 0.999071534 | Ifih1         | Ifih1         | IFIH1      | 17.54500839 | 21.52228612 | 12.92548231 | 18.59440456 | 16.02362759 | 27.72238354 | 9.060141087 | 13.74740803 | 12.41384751 | 11.63389568 |
| ENSMUSG00000038871 | -0.157673415 | 4.441099443 | 0.256225681 | 0.612725102 | 0.999071534 | Bpgm          | Bpgm          | BPGM       | 25.82625234 | 34.15106558 | 15.68561134 | 20.74524986 | 22.10606582 | 24.08427546 | 33.97552908 | 19.82666384 | 8.799689371 | 14.24825426 |
| ENSMUSG00000024521 | -0.248112228 | 2.147707675 | 0.256160736 | 0.612770135 | 0.999071534 | Pmaip1        | Pmaip1        | PMAIP1     | 6.73728322  | 4.743203553 | 6.193460271 | 3.885397967 | 2.681505025 | 4.875064822 | 1.812028217 | 6.839162787 | 1.178529826 | 4.705845444 |
| ENSMUSG00000020130 | 0.119412041  | 6.221521739 | 0.256158517 | 0.612771675 | 0.999071534 | Tbc1d15       | Tbc1d15       | TBC1D15    | 71.58363421 | 102.3939067 | 58.70323214 | 63.27648117 | 75.73616633 | 79.45628038 | 90.60141087 | 94.15938261 | 43.99844685 | 69.80337409 |
| ENSMUSG00000030000 | 0.323810211  | 0.494063468 | 0.256141125 | 0.612783735 | 0.999071534 | Add2          | Add2          | ADD2       | 1.894860906 | 0.948640711 | 1.750325729 | 0.763203172 | 0.523220493 | 2.037340523 | 2.200319978 | 0.828989429 | 0.392843275 | 1.633974113 |
| ENSMUSG00000024240 | 0.126666166  | 4.583040023 | 0.256075584 | 0.612829193 | 0.999071534 | Epc1          | Epc1          | EPC1       | 21.47509026 | 22.76737705 | 25.31240285 | 24.00620887 | 24.59136316 | 27.94067002 | 15.79053161 | 30.25811415 | 20.89926226 | 25.03248341 |
| ENSMUSG00000015659 | -0.252281132 | 1.682355373 | 0.255996775 | 0.61288386  | 0.999071534 | Serac1        | Serac1        | SERAC1     | 2.105401006 | 5.751134307 | 2.625488593 | 1.873316877 | 5.101399804 | 2.182864846 | 2.912188207 | 4.283112048 | 1.728510412 | 2.352922722 |
| ENSMUSG00000081137 | 0.376522424  | 0.745828101 | 0.255994325 | 0.612885561 | 0.999071534 | BC022960      | BC022960      |            | 1.333420637 | 2.430891821 | 1.346404407 | 1.110113705 | 0.719428178 | 1.236956746 | 1.035444696 | 3.385040167 | 0           | 2.875794438 |

|                     |              |              |             |             |             |               |               |               |             |             |             |             |             |             |              |             |             |             |
|---------------------|--------------|--------------|-------------|-------------|-------------|---------------|---------------|---------------|-------------|-------------|-------------|-------------|-------------|-------------|--------------|-------------|-------------|-------------|
| ENSMUSG00000021176  | -0.298374124 | 1.11686511   | 0.255971717 | 0.612901245 | 0.999071534 | Efcab11       | Efcab11       | EFcab11       | 3.438821644 | 1.007930755 | 2.423527932 | 3.469105327 | 1.24264867  | 2.328389169 | 2.006174098  | 0.414494714 | 2.199922343 | 1.830051006 |
| ENSMUSG000000084131 | -0.350901115 | 1.331203534  | 0.255970621 | 0.612902006 | 0.999071534 | RpB-ps2       | RpB-ps2       |               | 4.35116208  | 4.921073686 | 1.346404407 | 0.693821065 | 2.681505025 | 3.638108076 | 4.530070544  | 1.588896405 | 0.628549241 | 0.196076894 |
| ENSMUSG000000091905 | 0.528433422  | 0.912829255  | 0.255930553 | 0.612929806 | 0.999071534 | Gm6395        | Gm6395        |               | 3.859901845 | 0           | 0.403921322 | 1.80393477  | 1.569661478 | 0           | 1.035444696  | 0.414494714 | 6.049786443 | 1.30717929  |
| ENSMUSG000000031370 | 0.119153617  | 6.239066725  | 0.255714558 | 0.613079717 | 0.999071534 | Zrsr2         | Zrsr2         | ZRSR2         | 60.21446878 | 60.83158556 | 104.8175831 | 76.04278878 | 72.26983056 | 81.71190739 | 62.5149735   | 72.39841011 | 79.35434165 | 78.69219326 |
| ENSMUSG000000033411 | 0.139599807  | 4.553590975  | 0.255698693 | 0.613090731 | 0.999071534 | Ctdspl2       | Ctdspl2       | CTDSP2        | 21.68563036 | 29.70431225 | 21.60979073 | 14.91715291 | 28.12310149 | 33.61611862 | 28.53944442  | 23.00445665 | 21.05639957 | 13.13715187 |
| ENSMUSG000000029059 | -0.217312345 | 2.754342572  | 0.255651076 | 0.613123792 | 0.999071534 | Fam213b       | Fam213b       | FAM213B       | 8.351423991 | 4.743203553 | 6.126140051 | 12.07248654 | 5.232204928 | 9.240794513 | 9.966155196  | 4.766689215 | 2.592765618 | 4.052255799 |
| ENSMUSG000000055799 | -0.172858378 | 4.436512195  | 0.255394272 | 0.613302157 | 0.999071534 | Tcf7l1        | Tcf7l1        | TCF7L1        | 14.17636678 | 21.46299608 | 34.87187414 | 22.06350988 | 25.57240158 | 17.46291877 | 7.959981098  | 24.86968286 | 24.27771443 | 20.13056107 |
| ENSMUSG000000059714 | -0.11563328  | 6.708096683  | 0.255366691 | 0.613321168 | 0.999071534 | Flot1         | Flot1         | FLOT1         | 106.743831  | 113.9554654 | 106.2313077 | 100.6040545 | 137.4761845 | 106.9603774 | 106.58600884 | 122.4141056 | 57.11941226 | 96.01231886 |
| ENSMUSG000000056486 | 0.382439517  | 0.931172984  | 0.255301994 | 0.613366277 | 0.999071534 | Chn1          | Chn1          | CHN1          | 1.543960738 | 3.260952442 | 1.279084186 | 1.318260024 | 0.523220493 | 3.565345915 | 2.78275762   | 0.621742072 | 0           | 3.33330719  |
| ENSMUSG000000031954 | -0.128346831 | 7.51521703   | 0.255219044 | 0.613423928 | 0.999071534 | Cfdp1         | Cfdp1         | CFDP1         | 204.7853379 | 180.7753454 | 214.2129411 | 199.889849  | 190.5176619 | 194.7843064 | 242.0351976  | 134.6416997 | 107.8747634 | 175.7502556 |
| ENSMUSG000000086837 | 0.636555819  | -0.786764549 | 0.255215519 | 0.613426378 | 0.999071534 | Gm16618       | Gm16618       |               | 0           | 0.296450222 | 0           | 1.387642131 | 0.065402562 | 0           | 0.388291761  | 0.483577167 | 0.392843275 | 1.30717929  |
| ENSMUSG000000009681 | -0.117834986 | 5.475555104  | 0.255107622 | 0.613501386 | 0.999071534 | Bcr           | Bcr           | BCR           | 46.81008237 | 53.42033001 | 49.27840129 | 33.858468   | 57.48885164 | 58.35525354 | 25.8214021   | 45.66350103 | 31.663168   | 46.73165962 |
| ENSMUSG000000054237 | 0.173827689  | 3.026280001  | 0.255055083 | 0.613537917 | 0.999071534 | Fra10ac1      | Fra10ac1      | FRA10AC1      | 8.491784059 | 6.284744707 | 10.36731393 | 5.897479057 | 8.175320199 | 9.604605321 | 7.44225875   | 7.529987311 | 5.342668547 | 11.56853672 |
| ENSMUSG000000097518 | 0.331725081  | 0.981439578  | 0.255043244 | 0.613546149 | 0.999071534 | Gm26694       | Gm26694       |               | 2.17558104  | 1.185800888 | 0.673202203 | 0.693821065 | 3.858751134 | 3.056010784 | 2.006174098  | 0.27632981  | 1.807079067 | 2.941153403 |
| ENSMUSG000000039747 | 0.142420188  | 3.908079754  | 0.254866406 | 0.613669145 | 0.999071534 | Orai2         | Orai2         | ORAI2         | 16.84320805 | 17.96488346 | 13.80064517 | 8.533999106 | 16.80845833 | 17.17187012 | 14.30207986  | 17.61602536 | 12.49241616 | 13.85610048 |
| ENSMUSG000000025930 | -0.339078427 | 0.596476378  | 0.254737133 | 0.613759092 | 0.999071534 | Msc           | Msc           | MSC           | 2.17558104  | 1.126510844 | 3.567971678 | 0.555056852 | 0.588623054 | 2.110102684 | 1.812028217  | 0.759906976 | 0.785686551 | 0.588230681 |
| ENSMUSG000000079011 | 0.406677775  | -0.058710621 | 0.254674188 | 0.613802899 | 0.999071534 | Gm11033       | Gm11033       |               | 1.122880537 | 0.830060622 | 0.673202203 | 0.971349492 | 0.065402562 | 1.164194584 | 0.19414588   | 1.4507315   | 0.392843275 | 1.437897219 |
| ENSMUSG000000033319 | -0.117715235 | 4.887018506  | 0.254496199 | 0.613926809 | 0.999071534 | Fem1c         | Fem1c         | FEM1C         | 32.98461576 | 42.27380166 | 27.06272858 | 26.36520049 | 30.93541163 | 41.9837672  | 26.46855503  | 29.08371246 | 16.89226085 | 25.55355512 |
| ENSMUSG000000062202 | 0.136624691  | 4.492977373  | 0.254387259 | 0.614002676 | 0.999071534 | Btbd9         | Btbd9         | BTBD9         | 28.00183338 | 21.10725581 | 21.87907161 | 20.19019301 | 19.62076848 | 25.17570789 | 13.78435751  | 19.34308667 | 27.10618601 | 25.88214994 |
| ENSMUSG000000081170 | -0.311197178 | 0.38985388   | 0.254349852 | 0.614028731 | 0.999071534 | Gm12922       | Gm12922       |               | 1.052700503 | 1.719411288 | 1.077123525 | 0.832585279 | 2.092881971 | 1.018670261 | 1.035444696  | 1.243484143 | 0.31427462  | 1.503256184 |
| ENSMUSG000000053769 | -0.232698392 | 1.772086461  | 0.254191257 | 0.614139225 | 0.999071534 | Lysmd1        | Lysmd1        | LYSMD1        | 5.193322482 | 4.861783641 | 2.288887492 | 2.983430582 | 3.139322957 | 3.128772945 | 4.724216424  | 2.832380548 | 1.728510412 | 2.287563758 |
| ENSMUSG000000085295 | 0.283680438  | 1.296248424  | 0.254170349 | 0.614153794 | 0.999071534 | 4930430E12Rik | 4930430E12Rik |               | 2.877381375 | 3.201662398 | 0.740522424 | 2.150845303 | 1.896674286 | 2.910486461 | 3.818202315  | 1.934308667 | 0.549980586 | 3.464025119 |
| ENSMUSG000000020303 | 0.25534384   | 1.583701756  | 0.254105286 | 0.614199139 | 0.999071534 | Stc2          | Stc2          | STC2          | 2.456301174 | 3.260952442 | 3.231370576 | 3.258991623 | 2.223687094 | 7.785551283 | 2.006174098  | 2.486968286 | 1.021392516 | 2.875794438 |
| ENSMUSG000000042647 | 0.222419695  | 1.864091745  | 0.254075915 | 0.614219611 | 0.999071534 | Acad12        | Acad12        | ACAD10        | 4.56170218  | 4.387463286 | 3.366011017 | 2.150845303 | 2.419894779 | 2.910486461 | 3.947632902  | 3.315957715 | 3.355589479 | 4.248332693 |
| ENSMUSG000000087168 | 0.374093233  | 0.463624101  | 0.254000339 | 0.614272295 | 0.999071534 | Gm15983       | Gm15983       |               | 0.210540101 | 0.355740266 | 2.086926831 | 2.428373729 | 0.457817931 | 0.873145938 | 1.48845175   | 0.898071881 | 1.728510412 | 1.633974113 |
| ENSMUSG000000050919 | 0.784262439  | -1.255292568 | 0.253937339 | 0.61431622  | 0.999071534 | Zfp366        | Zfp366        | ZNF366        | 0.070180034 | 1.007930755 | 0           | 0           | 0           | 1.164194584 | 0.129430587  | 0           | 0.549980586 | 0           |
| ENSMUSG000000033596 | 0.114230546  | 5.939298026  | 0.253928554 | 0.614322345 | 0.999071534 | Rfwd3         | Rfwd3         | RFWD3         | 67.5833723  | 58.40069374 | 53.38493473 | 57.44838422 | 68.99970248 | 106.8876153 | 70.02194754  | 48.01230441 | 45.56981996 | 46.07806998 |
| ENSMUSG000000090083 | -0.130237436 | 4.536204991  | 0.253745105 | 0.614450292 | 0.999071534 | Rnf8          | Rnf8          | RNF8          | 26.45787265 | 23.30098745 | 28.74573409 | 24.49188361 | 22.10606582 | 31.72430242 | 27.11570797  | 18.09960253 | 10.52819978 | 22.2874069  |
| ENSMUSG000000084329 | 0.516080183  | 0.225520236  | 0.253618077 | 0.614538922 | 0.999071534 | Gm6733        | Gm6733        |               | 1.19306057  | 1.778701332 | 0.605881983 | 0           | 0.850233301 | 3.056010784 | 2.78275762   | 0.27632981  | 0.235705965 | 0           |
| ENSMUSG000000002699 | -0.195044614 | 4.085894442  | 0.25358301  | 0.614563394 | 0.999071534 | Lcp2          | Lcp2          | LCP2          | 27.30003305 | 22.35234674 | 13.80064517 | 11.37866547 | 19.29375567 | 30.19629703 | 25.56254092  | 8.497141644 | 4.478413341 | 11.89533154 |
| ENSMUSG000000020227 | 0.205790621  | 2.474120063  | 0.253449048 | 0.614656899 | 0.999071534 | Irak3         | Irak3         | IRAK3         | 5.965302851 | 6.936935196 | 4.375814322 | 2.497755836 | 6.605658721 | 5.311637791 | 4.659501131  | 7.391822406 | 3.378452169 | 7.385562989 |
| ENSMUSG000000023015 | 0.139982993  | 6.929363194  | 0.25336816  | 0.614713374 | 0.999071534 | Racgap1       | Racgap1       | RACGAP1       | 138.6055662 | 73.63823515 | 127.9084186 | 118.0189632 | 143.6240253 | 212.6837981 | 162.8236784  | 74.05638897 | 90.9825026  | 95.16265232 |
| ENSMUSG000000042501 | 0.28992201   | 1.815660652  | 0.25336317  | 0.614716858 | 0.999071534 | Cpa6          | Cpa6          | CPA6          | 0.842160403 | 2.786632087 | 6.597381593 | 3.399723221 | 2.092881971 | 2.037340523 | 1.48845175   | 4.075864691 | 4.32127603  | 5.427494054 |
| ENSMUSG000000098113 | -0.286114049 | 1.133581756  | 0.253271189 | 0.614781093 | 0.999071534 | Gm2445        | Gm2445        |               | 2.456301174 | 3.913142931 | 1.346404407 | 1.942698983 | 2.092881971 | 1.091432423 | 1.876743511  | 2.901463001 | 0.471411931 | 2.61435858  |
| ENSMUSG000000085791 | -0.729502347 | 6.654669205  | 0.253254768 | 0.614792562 | 0.999071534 | RpB0-ps9      | RpB0-ps9      |               | 372.3050779 | 210.6575278 | 4.577774983 | 71.60233396 | 0           | 280.4981327 | 131.3073305  | 9.395213526 | 0           | 0           |
| ENSMUSG000000004568 | -0.140270315 | 4.152204068  | 0.253217982 | 0.614818257 | 0.999071534 | Arhgef18      | Arhgef18      | CTD-2207O23.3 | 16.91338808 | 19.74358479 | 16.35881354 | 22.06350988 | 20.73261203 | 25.32123221 | 9.254286968  | 17.13244819 | 13.04239675 | 17.71227938 |
| ENSMUSG000000045657 | -0.410046631 | -0.136431493 | 0.253188294 | 0.614838995 | 0.999071534 | Pcdhb10       | Pcdhb10       | PCDH85        | 0.280720134 | 1.304380977 | 1.750325729 | 0.555056852 | 0.654025616 | 1.091432423 | 0.776583522  | 0.690824524 | 0           | 0.784307574 |
| ENSMUSG000000029851 | 0.249441035  | 2.026219568  | 0.252967279 | 0.614993432 | 0.999071534 | Fam115c       | Tcaf2         | TCAF2         | 5.052962415 | 6.225454663 | 2.423527932 | 3.469105327 | 1.504258917 | 6.184783729 | 6.406814054  | 4.214029596 | 1.414235792 | 3.202589261 |
| ENSMUSG000000078813 | 0.161768911  | 3.386031412  | 0.252931356 | 0.615018541 | 0.999071534 | Leng1         | Leng1         | LENG1         | 10.8779052  | 8.182026128 | 9.963392611 | 9.158438064 | 12.49188926 | 12.22404314 | 6.471529348  | 10.70778012 | 11.07818037 | 11.69925465 |

|                     |              |              |             |             |             |               |               |             |             |             |             |             |             |             |             |             |             |             |
|---------------------|--------------|--------------|-------------|-------------|-------------|---------------|---------------|-------------|-------------|-------------|-------------|-------------|-------------|-------------|-------------|-------------|-------------|-------------|
| ENSMUSG00000030747  | -0.222059089 | 1.981513274  | 0.252892572 | 0.615045653 | 0.999071534 | Dgat2         | Dgat2         | DGAT2       | 4.35116208  | 5.158233863 | 2.221567271 | 4.856747458 | 4.708984435 | 4.656778337 | 3.624056435 | 3.730452429 | 1.335667137 | 4.117614764 |
| ENSMUSG00000021982  | 0.143348271  | 3.845633942  | 0.252747953 | 0.615146771 | 0.999071534 | Cdadc1        | Cdadc1        | CDADC1      | 18.73806896 | 13.04380977 | 10.23267349 | 14.98653501 | 13.27672    | 14.62519447 | 16.95540689 | 11.88218181 | 11.78529826 | 16.86261284 |
| ENSMUSG00000026576  | -0.208161057 | 3.078338012  | 0.252628992 | 0.615229977 | 0.999071534 | Atp1b1        | Atp1b1        | ATP1B1      | 11.79024564 | 8.122736084 | 8.818948865 | 10.06040545 | 7.39048946  | 16.37148634 | 9.707294022 | 6.493750525 | 1.964216377 | 5.22871716  |
| ENSMUSG00000024683  | 0.16801446   | 4.73496043   | 0.252614507 | 0.615240109 | 0.999071534 | Mrpl16        | Mrpl16        | MRPL16      | 46.2486421  | 25.25755892 | 20.1960661  | 16.85985189 | 21.9752607  | 38.12737264 | 44.20054545 | 11.605852   | 22.70634132 | 20.91486864 |
| ENSMUSG00000039033  | 0.165672732  | 3.515272868  | 0.252393996 | 0.615394413 | 0.999071534 | Tasp1         | Tasp1         | TASP1       | 8.351423991 | 10.79078808 | 11.2424768  | 12.62754339 | 12.0994739  | 13.38823772 | 15.27280926 | 7.253657501 | 12.88525944 | 8.431306421 |
| ENSMUSG00000036501  | 0.16002439   | 3.758101454  | 0.252306496 | 0.615455665 | 0.999071534 | Fam13b        | Fam13b        | FAM13B      | 13.19384631 | 20.04003501 | 9.626791509 | 8.04832436  | 15.23879685 | 15.06176744 | 12.36062105 | 19.75758138 | 8.878258026 | 12.61428015 |
| ENSMUSG00000039067  | 0.161589165  | 7.259906582  | 0.252291525 | 0.615466147 | 0.999071534 | Psmid7        | Psmid7        | PSMD7       | 210.5401006 | 172.7118994 | 117.002543  | 120.447337  | 132.9634077 | 247.318587  | 262.9382374 | 69.42786466 | 107.9533321 | 116.7311106 |
| ENSMUSG00000030515  | 0.210537301  | 2.55194717   | 0.252219316 | 0.615516706 | 0.999071534 | Tarsl2        | Tarsl2        | TARSL2      | 7.228543455 | 5.395394041 | 2.356207712 | 6.03624327  | 6.605658721 | 8.58593506  | 8.995425794 | 3.730452429 | 3.221314859 | 6.013024734 |
| ENSMUSG00000053475  | -0.136211823 | 5.048525131  | 0.252192304 | 0.615535621 | 0.999071534 | Tnfaip6       | Tnfaip6       | TNFAIP6     | 42.95018053 | 40.73226051 | 28.4764532  | 34.34414274 | 32.83208592 | 17.82672957 | 43.03567016 | 32.46875263 | 28.28471584 | 26.40502166 |
| ENSMUSG00000032816  | 0.689829739  | -0.748557007 | 0.25203932  | 0.615642776 | 0.999071534 | Igdcc4        | Igdcc4        | IGDCC4      | 1.333420637 | 0.177870133 | 0           | 0           | 0.327012808 | 0.727621615 | 2.006174098 | 0           | 0           | 0.130717929 |
| ENSMUSG00000001504  | 0.144489748  | 5.691063597  | 0.251990337 | 0.615677094 | 0.999071534 | Irx2          | Irx2          | IRX2        | 35.79181711 | 33.97319545 | 74.25420304 | 50.92646621 | 58.53529263 | 55.29924276 | 26.92156209 | 66.87181392 | 54.99805857 | 53.13683814 |
| ENSMUSG00000097203  | -0.375845397 | 0.702535525  | 0.25176253  | 0.615836751 | 0.999071534 | 4732419C18Rik | 4732419C18Rik |             | 0.98252047  | 0.652190488 | 2.558168373 | 2.497755836 | 1.962076848 | 0.800383777 | 1.164875283 | 1.4507315   | 0           | 2.941153403 |
| ENSMUSG00000060441  | -0.46297928  | -0.199662304 | 0.251730236 | 0.615859391 | 0.999071534 | Trim5         | Trim5         | TRIM5       | 1.19306057  | 1.245090933 | 1.144443746 | 0.069382107 | 0.850233301 | 1.018670261 | 0.19414588  | 0.621742072 | 1.099961171 | 0           |
| ENSMUSG00000013150  | 0.132146174  | 4.176985634  | 0.251603787 | 0.615948059 | 0.999071534 | Gfod2         | Gfod2         | GFOD2       | 17.89590855 | 15.65257172 | 20.5326672  | 17.13738032 | 17.65869163 | 22.48350791 | 20.51474803 | 13.0565835  | 19.56359512 | 14.64040805 |
| ENSMUSG00000049960  | 0.122086385  | 6.102441748  | 0.251413323 | 0.616081667 | 0.999071534 | Mrps16        | Mrps16        | MRPS16      | 84.07568018 | 55.91051188 | 60.72283875 | 75.69587824 | 63.96370524 | 53.98952385 | 94.35489789 | 56.92394077 | 65.13341508 | 69.28050238 |
| ENSMUSG00000034462  | 0.123364407  | 6.403251984  | 0.251294504 | 0.616165049 | 0.999071534 | Pkd2          | Pkd2          | PKD2        | 66.81139193 | 86.50417479 | 77.75485449 | 94.15151859 | 93.65646821 | 78.00103715 | 55.33157592 | 99.61689635 | 81.94710727 | 104.0514715 |
| ENSMUSG00000030748  | -0.13581843  | 6.78732494   | 0.251239658 | 0.616203546 | 0.999071534 | Il4ra         | Il4ra         | IL4R        | 157.9050755 | 153.2054747 | 92.56530297 | 84.7155521  | 114.8468982 | 162.623431  | 139.5261727 | 86.56031285 | 49.3411154  | 88.7574738  |
| ENSMUSG00000059475  | 0.212030395  | 2.908575011  | 0.250948175 | 0.616408228 | 0.999071534 | Zfp426        | Zfp426        | ZNF426      | 8.140883891 | 10.90936817 | 4.375814322 | 2.428373729 | 10.07199449 | 7.203453991 | 11.13103048 | 7.529987311 | 6.521198373 | 5.620870947 |
| ENSMUSG00000079069  | -0.393998693 | -0.085050638 | 0.250659101 | 0.616611366 | 0.999071534 | 8430423G03Rik | 8430423G03Rik |             | 1.333420637 | 1.185800888 | 0.269280881 | 0.138764213 | 1.896674286 | 0.9459081   | 0.970729402 | 0.27632981  | 0.549980586 | 0.653589645 |
| ENSMUSG00000055184  | 0.224643307  | 1.924737926  | 0.250539759 | 0.616695273 | 0.999071534 | Fam72a        | Fam72a        | FAM72C      | 4.280982046 | 1.600831199 | 3.164050356 | 4.162926393 | 4.316569065 | 5.166113468 | 5.565515239 | 3.039627905 | 2.514196963 | 3.137230296 |
| ENSMUSG00000055435  | 0.156984585  | 7.806981477  | 0.250528402 | 0.616703259 | 0.999071534 | Maf           | Maf           | MAF         | 163.0282179 | 166.6643148 | 241.6122708 | 288.8377096 | 231.1326527 | 214.3573278 | 119.8527235 | 221.9619195 | 261.7121901 | 295.4878785 |
| ENSMUSG00000082920  | 0.39053778   | 0.401906962  | 0.250493719 | 0.616727649 | 0.999071534 | Gm13864       | Gm13864       |             | 1.965040939 | 0           | 1.077123525 | 1.248877918 | 1.046440986 | 2.473913492 | 1.359021163 | 1.865226215 | 0.628549241 | 0.457512752 |
| ENSMUSG00000007038  | -0.11854967  | 4.936048609  | 0.25032344  | 0.616847425 | 0.999071534 | Neu1          | Neu1          | NEU1        | 41.89748002 | 41.97735144 | 27.1300488  | 28.16913526 | 25.96481695 | 37.03594021 | 32.48707733 | 31.01802112 | 18.62077126 | 24.18281687 |
| ENSMUSG00000070834  | 0.510277587  | -0.200614118 | 0.250234399 | 0.616910078 | 0.999071534 | Gm13015       | Gm13015       |             | 2.105401006 | 0.355740266 | 0           | 0.138764213 | 0.588623054 | 1.528005392 | 0.970729402 | 1.312566595 | 0           | 0.588230681 |
| ENSMUSG00000005087  | 0.127778988  | 8.712516953  | 0.250113552 | 0.616995133 | 0.999071534 | Cd44          | Cd44          | CD44        | 355.8829501 | 417.4019126 | 486.6578729 | 423.9940531 | 392.4807721 | 487.1426714 | 489.312334  | 365.4461732 | 398.3430813 | 368.8206367 |
| ENSMUSG00000050234  | 0.249899168  | 2.04600696   | 0.25010958  | 0.61699793  | 0.999071534 | Gja4          | Gja4          | GJA4        | 3.579181711 | 1.600831199 | 6.328100712 | 4.717983245 | 2.616102464 | 6.69411886  | 3.041618794 | 1.934308667 | 5.735511822 | 3.529384083 |
| ENSMUSG00000052736  | -0.290921679 | 1.375417985  | 0.24999742  | 0.617076894 | 0.999071534 | Klrc2         | Klrc2         | KLRC4-KLRK1 | 2.38612114  | 1.067220799 | 5.654898509 | 2.567137942 | 2.354492217 | 3.856394561 | 2.070889391 | 0.690824524 | 2.907040239 | 1.241820326 |
| ENSMUSG00000022913  | 0.119331976  | 4.749400537  | 0.249851404 | 0.617179728 | 0.999071534 | Psmg1         | Psmg1         | PSMG1       | 32.77407566 | 20.92938568 | 26.7934477  | 27.5446963  | 25.11458365 | 31.43325378 | 32.29239145 | 22.58996193 | 17.20653547 | 32.81020018 |
| ENSMUSG00000037336  | 0.369249797  | 0.285790645  | 0.249824018 | 0.617199019 | 0.999071534 | Mfsd2b        | Mfsd2b        | MFSD2B      | 0.98252047  | 0.5336104   | 1.817645949 | 1.318260024 | 0.261610246 | 0.363810808 | 0.647152935 | 1.105319238 | 1.649941757 | 1.895409971 |
| ENSMUSG00000063060  | -0.232655786 | 2.369220116  | 0.249761502 | 0.617243061 | 0.999071534 | Sox7          | Sox7          | SOX7        | 4.491522147 | 3.616692709 | 9.89607239  | 4.232308499 | 6.017035667 | 5.893735083 | 3.106334087 | 4.973936572 | 6.206923753 | 1.764692042 |
| ENSMUSG00000097204  | -0.3414527   | 0.773345775  | 0.249759206 | 0.617244679 | 0.999071534 | Gm17690       | Gm17690       |             | 3.509001677 | 2.845922132 | 0.942483085 | 0.20814632  | 1.765869163 | 0.654859454 | 0.970729402 | 2.279720929 | 0.942823861 | 1.699333077 |
| ENSMUSG00000038248  | -0.226338378 | 2.818778214  | 0.249749043 | 0.617251839 | 0.999071534 | Sobp          | Sobp          | SOBP        | 8.211063924 | 6.877645151 | 10.97319592 | 7.493267507 | 5.101399804 | 10.62327558 | 3.17104938  | 2.625133191 | 9.742513232 | 4.379050622 |
| ENSMUSG00000072825  | -0.125709965 | 5.039833986  | 0.249693027 | 0.61729131  | 0.999071534 | Cep170b       | Cep170b       | CEP170B     | 29.61597415 | 50.45582779 | 27.39932968 | 26.78149313 | 44.08132652 | 45.54911311 | 26.46855503 | 35.92287524 | 18.07079067 | 29.0847392  |
| ENSMUSG00000024036  | 0.258043007  | 1.598736908  | 0.249442676 | 0.61746778  | 0.999071534 | Slc37a1       | Slc37a1       | SLC37A1     | 2.666841275 | 2.253021687 | 3.433331237 | 2.844666369 | 2.485297341 | 1.8918162   | 0.970729402 | 4.214029596 | 3.535589479 | 4.117614764 |
| ENSMUSG00000023032  | -0.393972931 | 0.186168667  | 0.249422287 | 0.617482157 | 0.999071534 | Slc4a8        | Slc4a8        | SLC4A8      | 0.701800335 | 1.363671021 | 1.95228639  | 0.693821065 | 1.177246109 | 0.9459081   | 0.323576467 | 1.243484143 | 0           | 1.764692042 |
| ENSMUSG00000087230  | 0.381661057  | -0.00257334  | 0.249341039 | 0.617539455 | 0.999071534 | Mroh3         | Mroh3         |             | 1.122880537 | 0.415030311 | 1.279084186 | 0.485674746 | 0.654025616 | 0.218286485 | 0.453007054 | 0.828989429 | 1.492804447 | 1.503256184 |
| ENSMUSG000000001138 | -0.140303647 | 3.880442465  | 0.249235791 | 0.617613695 | 0.999071534 | Cnmn3         | Cnmn3         | CNNM3       | 16.14140771 | 15.8897319  | 13.39672385 | 14.63962448 | 19.55536592 | 19.93683226 | 10.35444696 | 16.51070612 | 8.32827744  | 13.39858772 |
| ENSMUSG00000025085  | 0.152742875  | 3.77034693   | 0.249229518 | 0.617618121 | 0.999071534 | Ablim1        | Ablim1        | ABLIM1      | 11.36916543 | 15.83044186 | 14.94508892 | 10.06040545 | 14.38856355 | 15.86215121 | 7.895265804 | 16.57978857 | 14.45663254 | 13.20251083 |
| ENSMUSG00000039217  | 0.160365903  | 4.704896265  | 0.249155848 | 0.617670099 | 0.999071534 | Il18          | Il18          | IL18        | 21.5452703  | 19.98074497 | 19.38822346 | 40.79667865 | 24.19894779 | 13.16995124 | 28.86302089 | 31.29435093 | 21.84208612 | 33.98666154 |

|                    |              |              |             |             |             |               |               |             |             |             |             |             |             |             |             |             |             |             |             |
|--------------------|--------------|--------------|-------------|-------------|-------------|---------------|---------------|-------------|-------------|-------------|-------------|-------------|-------------|-------------|-------------|-------------|-------------|-------------|-------------|
| ENSMUSG00000043346 | 0.342765579  | 3.534837747  | 0.249139433 | 0.617681682 | 0.999071534 | Gm6741        | Gm6741        | NANP        | 7.439083555 | 12.03587901 | 18.37842015 | 3.538487434 | 11.38004572 | 19.06368632 | 20.38531745 | 17.96143762 | 0           | 7.843075741 |             |
| ENSMUSG00000051169 | -0.360890577 | 0.959735972  | 0.249112394 | 0.617700763 | 0.999071534 | Rpusd3        | Rpusd3        | RPUSD3      | 1.754500839 | 2.727342043 | 3.433331237 | 1.387642131 | 1.24264867  | 4.365729691 | 2.200319978 | 0.207247357 | 1.257098482 | 0.130717929 |             |
| ENSMUSG00000066724 | 0.128010842  | 7.637970045  | 0.249102947 | 0.61770743  | 0.999071534 | Gm10175       | Gm10175       |             | 160.9228169 | 222.1005063 | 186.2750497 | 193.5760773 | 224.6577991 | 182.3419768 | 270.8982185 | 181.0651077 | 161.7728608 | 202.9395848 |             |
| ENSMUSG00000028177 | -0.572416895 | -0.559108778 | 0.248984705 | 0.617790887 | 0.999071534 | 1810013D15Rik | 1810013D15Rik |             | 0           | 0.118580089 | 1.817645949 | 1.248877918 | 0.196207685 | 0.291048646 | 0           | 0.345412262 | 1.021392516 | 0.326794823 |             |
| ENSMUSG00000033777 | -0.186596057 | 4.616825352  | 0.248596184 | 0.618065287 | 0.999071534 | Tlr13         | Tlr13         |             | 38.52883841 | 32.49094434 | 19.05162236 | 24.14497308 | 20.99422227 | 43.51177259 | 40.7059196  | 11.4676871  | 8.485414751 | 12.54892118 |             |
| ENSMUSG00000028057 | -0.107558202 | 5.532681189  | 0.248432218 | 0.61818117  | 0.999071534 | Rlt1          | Rlt1          | RIT1        | 50.74016425 | 51.16730832 | 44.83526675 | 51.48152306 | 50.16376474 | 41.25614558 | 56.5611665  | 46.56157291 | 29.46324566 | 41.11078867 |             |
| ENSMUSG00000044562 | -0.152690892 | 3.950841523  | 0.24838193  | 0.618216722 | 0.999071534 | Rasip1        | Rasip1        | RASI P1     | 16.49230788 | 15.47470159 | 24.10063888 | 15.68035608 | 11.90326621 | 23.50217817 | 12.03704459 | 10.84594503 | 7.778296855 | 18.43122799 |             |
| ENSMUSG00000099041 | 0.913577529  | -1.283286411 | 0.248378308 | 0.618219282 | 0.999071534 | LRRc8A        | Gm28035       | LRRc8A      | 0           | 1.007930755 | 0           | 0           | 0           | 1.018670261 | 0           | 0           | 0.785686551 | 0           |             |
| ENSMUSG00000027210 | -0.198727051 | 3.014264129  | 0.248227766 | 0.618325735 | 0.999071534 | Meis2         | Meis2         | MEIS2       | 5.333682549 | 10.49433786 | 7.943786    | 7.285121188 | 13.14591488 | 4.875064822 | 4.788931717 | 11.81309936 | 5.892649132 | 7.646998847 |             |
| ENSMUSG00000020455 | 0.127615036  | 4.282157821  | 0.2482065   | 0.618340777 | 0.999071534 | Trim11        | Trim11        | TRIM11      | 20.63292986 | 18.49849386 | 18.91698192 | 19.42698983 | 18.31271725 | 19.2819728  | 14.23736457 | 19.34308667 | 18.69933991 | 24.83640651 |             |
| ENSMUSG00000066233 | 0.206827706  | 2.168377775  | 0.248147005 | 0.618382861 | 0.999071534 | Tmem42        | Tmem42        | TMEM42      | 3.438821644 | 4.565333419 | 4.039213221 | 5.273040098 | 3.597140888 | 3.274297269 | 5.371369359 | 4.421276953 | 5.185531236 | 3.725460977 |             |
| ENSMUSG00000032656 | -0.38333258  | 0.289688763  | 0.2480933   | 0.618420855 | 0.999071534 |               | 3-Mar         | 3-Mar       | 3-Mar       | 2.526481208 | 1.778701332 | 0.942483085 | 0           | 1.24264867  | 1.091432423 | 1.100159989 | 0.828989429 | 0.864255206 | 0.653589645 |
| ENSMUSG00000078716 | -0.311593125 | 0.657835621  | 0.247989184 | 0.618494527 | 0.999071534 | Tmem8b        | Tmem8b        | TMEM8B      | 1.473780704 | 1.837991377 | 0.740522424 | 1.80393477  | 2.419894779 | 1.964578361 | 1.035444696 | 1.72706131  | 0.15713731  | 1.568615148 |             |
| ENSMUSG00000022781 | 0.1165826    | 6.96873307   | 0.247757555 | 0.618658497 | 0.999071534 | Pak2          | Pak2          | PAK2        | 123.7975792 | 156.169977  | 121.3110371 | 98.73073762 | 125.1805029 | 176.6665282 | 115.5167989 | 115.0913657 | 125.0812989 | 98.43060054 |             |
| ENSMUSG00000042425 | 0.373387171  | 0.400720116  | 0.247742723 | 0.618669    | 0.999071534 | Frmpd3        | Frmpd3        | FRMPD3      | 0.491260235 | 0.711480533 | 2.423527932 | 1.179495811 | 0.523220493 | 0.873145938 | 0.19414588  | 2.556050739 | 0.707117896 | 2.091486864 |             |
| ENSMUSG00000041000 | -0.275399813 | 1.144665827  | 0.247631461 | 0.618747798 | 0.999071534 | Trim62        | Trim62        | TRIM62      | 2.245761073 | 3.379532531 | 1.279084186 | 2.22022741  | 2.681505025 | 4.29296753  | 1.876743511 | 1.174401691 | 1.492804447 | 0.653589645 |             |
| ENSMUSG00000017861 | 0.195263686  | 4.030063775  | 0.247583468 | 0.618781796 | 0.999071534 | Mybl2         | Mybl2         | MYBL2       | 24.77355184 | 11.97658897 | 17.09933597 | 7.978942253 | 17.33167882 | 43.94834556 | 17.27898336 | 8.773471454 | 7.228316269 | 12.94107497 |             |
| ENSMUSG00000092470 | 0.5332187    | -0.35789744  | 0.247582335 | 0.618782598 | 0.999071534 | Gm20518       | Gm20518       | DGCR2       | 0           | 0.830060622 | 1.144443746 | 0           | 0.850233301 | 0.9459081   | 0.129430587 | 0.414494714 | 1.807079067 | 0.261435858 |             |
| ENSMUSG00000008305 | 0.111821355  | 4.914777509  | 0.247454502 | 0.618873171 | 0.999071534 | Tle1          | Tle1          | TLE1        | 30.17741442 | 26.38406976 | 29.08233519 | 30.04245214 | 34.14013715 | 37.83632399 | 25.04481858 | 24.3861057  | 30.87748145 | 32.09125157 |             |
| ENSMUSG00000027285 | 0.168227243  | 4.297633806  | 0.247435278 | 0.618886795 | 0.999071534 | Haus2         | Haus2         | HAUS2       | 27.93165335 | 21.34441599 | 18.91698192 | 10.82360862 | 17.2008737  | 21.68312413 | 39.28218314 | 14.92180972 | 13.8280833  | 11.045665   |             |
| ENSMUSG00000034463 | -0.126189414 | 4.722208091  | 0.247417698 | 0.618899254 | 0.999071534 | Scara3        | Scara3        | SCARA3      | 26.52805268 | 30.23792265 | 27.66861056 | 23.24300569 | 35.12117558 | 32.30639972 | 33.52252202 | 24.80060041 | 11.62816095 | 22.15668897 |             |
| ENSMUSG00000035274 | 0.122470108  | 6.62524604   | 0.247405882 | 0.618907628 | 0.999071534 | Tpbg          | Tpbg          | TPBG        | 73.54867515 | 75.77267675 | 115.5214981 | 122.4594181 | 99.804309   | 110.5257234 | 79.53509569 | 111.6372431 | 101.589271  | 87.71173037 |             |
| ENSMUSG00000034248 | 0.148032484  | 6.573680851  | 0.247318978 | 0.618969226 | 0.999071534 | Slc25a37      | Slc25a37      | SLC25A37    | 99.16438739 | 112.2360541 | 82.53459014 | 80.83015413 | 94.83371431 | 81.27533442 | 59.79693117 | 184.2429005 | 56.72656898 | 98.62667744 |             |
| ENSMUSG00000020702 | -0.666965194 | -0.926750758 | 0.247307959 | 0.618977037 | 0.999071534 | Ccl1          | Ccl1          | CCL1        | 1.473780704 | 0           | 0.134640441 | 0.832585279 | 0.065402562 | 0.072762162 | 0           | 1.105319238 | 0           | 0.261435858 |             |
| ENSMUSG00000031585 | -0.109334679 | 5.717575744  | 0.247252576 | 0.619016302 | 0.999071534 | Gtf2e2        | Gtf2e2        | GTTF2E2     | 53.75790569 | 64.86330858 | 53.99081671 | 48.15118194 | 62.72105657 | 49.18722119 | 62.77383467 | 59.47999151 | 30.56320683 | 43.20227554 |             |
| ENSMUSG00000044167 | -0.135602879 | 4.73235628   | 0.246950578 | 0.619230502 | 0.999071534 | Foxo1         | Foxo1         | FOXO1       | 21.5452703  | 36.70053749 | 32.91958775 | 26.78149313 | 25.63780415 | 31.86982675 | 12.8783434  | 24.45518815 | 20.58498764 | 32.67948225 |             |
| ENSMUSG00000039634 | -0.181801764 | 2.622327793  | 0.246827752 | 0.619317665 | 0.999071534 | Zfp189        | Zfp189        | ZNF189      | 4.982782381 | 8.004155995 | 5.789538949 | 7.007592761 | 7.39048946  | 5.020589145 | 4.853647011 | 6.839162787 | 4.556981996 | 5.751588876 |             |
| ENSMUSG00000063052 | 0.12914291   | 4.957394931  | 0.246676717 | 0.619424885 | 0.999071534 | Lrrc40        | Lrrc40        | LRRc40      | 34.17767633 | 35.5147366  | 29.14965541 | 23.65929833 | 31.52403469 | 41.0378591  | 47.11273365 | 34.05764903 | 17.99222202 | 19.08481764 |             |
| ENSMUSG00000039735 | -0.101732624 | 6.215141492  | 0.246651378 | 0.619442877 | 0.999071534 | Fnbp1l        | Fnbp1l        | FNBP1L      | 71.72399428 | 85.61482412 | 88.59340997 | 68.48013916 | 84.69631727 | 89.93403164 | 66.78618287 | 77.37234668 | 51.14819447 | 64.05178521 |             |
| ENSMUSG00000023909 | -0.178229685 | 3.52693739   | 0.24657833  | 0.619494752 | 0.999071534 | Paqr4         | Paqr4         | PAQR4       | 14.73780704 | 6.936935196 | 17.23397641 | 10.75422652 | 13.21131744 | 18.99092416 | 7.959891098 | 10.56961522 | 9.663944577 | 5.555511983 |             |
| ENSMUSG00000071532 | 0.463534192  | 0.684580316  | 0.246571177 | 0.619499833 | 0.999071534 | Gm10335       | Gm10335       |             | 0           | 0.830060622 | 3.096730136 | 0           | 2.550699902 | 1.746291877 | 2.459181152 | 2.901463001 | 0.549980586 | 0.71894861  |             |
| ENSMUSG00000087029 | -0.344030682 | 0.182007742  | 0.24654367  | 0.61951937  | 0.999071534 | Gm14133       | Gm14133       |             | 0.912340436 | 1.48225111  | 1.211763966 | 1.318260024 | 0.850233301 | 0.800383777 | 0.19414588  | 1.72706131  | 0.471411931 | 1.045743432 |             |
| ENSMUSG00000044600 | 0.118263265  | 6.321681677  | 0.246369484 | 0.619643117 | 0.999071534 | Smim7         | Smim7         | CTC-429P9.4 | 79.37361794 | 88.22358608 | 67.522181   | 86.03381212 | 75.80156889 | 80.183902   | 127.8774199 | 70.87859616 | 56.25515705 | 67.97332309 |             |
| ENSMUSG00000066235 | -0.183155822 | 2.848004807  | 0.246326055 | 0.619673979 | 0.999071534 | Pomgnt2       | Pomgnt2       | POMGNT2     | 11.57970553 | 5.751134307 | 5.789538949 | 6.660682229 | 9.41796887  | 8.367648575 | 7.377543457 | 4.352194501 | 4.556981996 | 7.777716776 |             |
| ENSMUSG00000025280 | 0.145504589  | 3.791910311  | 0.246289829 | 0.619699724 | 0.999071534 | Polr3a        | Polr3a        | POLR3A      | 14.03600671 | 16.71979252 | 9.82875217  | 10.19916966 | 17.2008737  | 20.15511874 | 10.67802342 | 15.68171669 | 9.742513232 | 14.57504908 |             |
| ENSMUSG00000038679 | -0.135138359 | 6.603517115  | 0.245916143 | 0.619965441 | 0.999071534 | Trps1         | Trps1         | TRPS1       | 73.61885519 | 91.12879825 | 109.8665996 | 123.6389139 | 127.4695926 | 84.18582088 | 52.87239477 | 98.0970824  | 106.3033903 | 94.11690889 |             |
| ENSMUSG00000040370 | 0.155209464  | 4.016787296  | 0.245883169 | 0.619988899 | 0.999071534 | Lym5          | Lym5          | LYRM5       | 18.38716879 | 16.12689208 | 10.83855548 | 20.46772143 | 12.68809695 | 12.87890259 | 25.56254092 | 12.29667653 | 12.33527885 | 18.16979213 |             |
| ENSMUSG00000041859 | 0.146871814  | 6.221296526  | 0.245839485 | 0.620019981 | 0.999071534 | Mcm3          | Mcm3          | MCM3        | 99.65564763 | 44.82327357 | 77.14897251 | 62.513278   | 84.04229165 | 163.2055283 | 86.91263914 | 44.07460463 | 43.36989761 | 61.37206767 |             |
| ENSMUSG00000026427 | -0.120142218 | 4.644458985  | 0.245810908 | 0.620040315 | 0.999071534 | Eif2d         | Eif2d         | EIF2D       | 35.79181711 | 26.02832949 | 23.1581558  | 24.42250151 | 25.44159646 | 31.94258891 | 29.18659736 | 22.58996193 | 14.92804447 | 18.75802281 |             |

|                    |              |              |             |             |             |               |               |          |             |             |             |             |             |             |             |             |             |             |
|--------------------|--------------|--------------|-------------|-------------|-------------|---------------|---------------|----------|-------------|-------------|-------------|-------------|-------------|-------------|-------------|-------------|-------------|-------------|
| ENSMUSG00000050965 | 0.111518551  | 5.943831709  | 0.245777394 | 0.620064165 | 0.999071534 | Prkca         | Prkca         | PRKCA    | 52.14376492 | 56.62199241 | 64.35813065 | 59.59922953 | 73.77408948 | 67.59604805 | 49.05419246 | 70.18777163 | 65.76196432 | 51.3721461  |
| ENSMUSG00000056144 | -0.268767306 | 1.415396992  | 0.245752619 | 0.620081796 | 0.999071534 | Trim34a       | Trim34a       | TRIM34   | 3.36864161  | 4.328173242 | 0.740522424 | 4.02416218  | 1.831271725 | 1.819054038 | 1.747312924 | 2.832380548 | 2.199922343 | 2.287563758 |
| ENSMUSG00000015850 | -0.11889892  | 5.69932487   | 0.245451885 | 0.62029591  | 0.999071534 | Adamts4       | Adamts4       | ADAMTSL4 | 63.02167012 | 66.2269796  | 53.04833363 | 44.05763766 | 54.67654149 | 37.47251318 | 37.7290161  | 46.56157291 | 46.66978113 | 66.92757965 |
| ENSMUSG00000028127 | -0.115729043 | 5.401949844  | 0.24544177  | 0.620303115 | 0.999071534 | Abcd3         | Abcd3         | ABCD3    | 42.31856023 | 62.78815703 | 40.45945243 | 40.17223969 | 42.18465223 | 60.90192919 | 44.84769838 | 40.68956446 | 21.99922343 | 32.81020018 |
| ENSMUSG00000026737 | -0.11129886  | 5.272099129  | 0.245346953 | 0.620370657 | 0.999071534 | Pip4k2a       | Pip4k2a       | PIP4K2A  | 42.17820016 | 43.16315233 | 44.76794653 | 40.2416218  | 37.14865499 | 58.35525354 | 38.63503021 | 33.2286596  | 28.12757853 | 24.44425272 |
| ENSMUSG00000097908 | 0.183590313  | 3.202251074  | 0.245285472 | 0.620414461 | 0.999071534 | 4933404O12Rik | 4933404O12Rik |          | 10.10592483 | 8.063446039 | 10.16535327 | 6.521918016 | 9.41796887  | 16.66253499 | 11.06631518 | 5.872008453 | 3.457020824 | 11.82997258 |
| ENSMUSG00000036019 | -0.349383569 | 0.745397195  | 0.245110829 | 0.62053893  | 0.999071534 | Tmtc2         | Tmtc2         | TMTC2    | 1.614140771 | 2.312311732 | 1.683005509 | 2.150845303 | 1.111843547 | 3.638108076 | 0.906014109 | 0.828989429 | 0           | 1.764692042 |
| ENSMUSG00000020089 | 0.133906445  | 7.302032242  | 0.245087201 | 0.620555774 | 0.999071534 | Ppa1          | Ppa1          | PPA1     | 183.3804276 | 112.5325043 | 172.5417247 | 148.3389438 | 164.2258322 | 222.5794521 | 224.3032072 | 92.57048621 | 120.2100423 | 151.7635156 |
| ENSMUSG00000032097 | -0.107486213 | 6.709021654  | 0.24501599  | 0.620606545 | 0.999071534 | Ddx6          | Ddx6          | DDX6     | 93.12890451 | 112.4139242 | 108.9241165 | 117.880199  | 129.6278771 | 131.553988  | 81.4118392  | 94.15938261 | 76.91871334 | 107.1887018 |
| ENSMUSG00000050244 | 0.177103682  | 4.981295943  | 0.244988135 | 0.620626407 | 0.999071534 | Heatr1        | Heatr1        | HEATR1   | 46.73990234 | 35.04041624 | 21.60979073 | 21.43907092 | 29.49655528 | 75.67264798 | 46.33615013 | 14.92180972 | 13.43524002 | 22.35276586 |
| ENSMUSG00000054074 | 0.403553848  | 0.307304095  | 0.244971916 | 0.620637973 | 0.999071534 | Skida1        | Skida1        | SKIDA1   | 0.561440268 | 0.474320355 | 0           | 2.567137942 | 1.24264867  | 1.309718907 | 1.423736457 | 1.796143762 | 0.864255206 | 0.71894861  |
| ENSMUSG00000052738 | -0.125198889 | 6.169917771  | 0.244957104 | 0.620648535 | 0.999071534 | Suc1g1        | Suc1g1        | SUCLG1   | 89.5497228  | 64.74472849 | 76.27380965 | 87.9765111  | 69.71913066 | 90.22508029 | 98.82025314 | 37.30452429 | 44.70556475 | 67.97332309 |
| ENSMUSG00000022269 | 0.520610181  | -0.118852634 | 0.24481511  | 0.620749815 | 0.999071534 | 11-Mar        | 11-Mar        | 11-Mar   | 1.894860906 | 0           | 0.403921322 | 0           | 1.111843547 | 0.509335131 | 2.394465859 | 0.483577167 | 0.15713731  | 0.980384468 |
| ENSMUSG00000003746 | 0.115648459  | 6.733096269  | 0.244672707 | 0.620851423 | 0.999071534 | Man1a         | Man1a         | MAN1A1   | 92.00602397 | 102.3346166 | 99.23000478 | 108.5136146 | 127.2079823 | 139.194015  | 150.5277726 | 85.45499361 | 80.29716551 | 85.35880764 |
| ENSMUSG00000073423 | -0.148287679 | 3.991865506  | 0.244662859 | 0.620858451 | 0.999071534 | Zfp414        | Zfp414        | ZNF414   | 12.7727661  | 18.67636399 | 20.12874588 | 16.09664872 | 18.37811981 | 16.51701067 | 8.607134033 | 14.92180972 | 10.68533709 | 21.89525311 |
| ENSMUSG00000030407 | -0.173653479 | 3.494802345  | 0.244594809 | 0.620907021 | 0.999071534 | Qpctl         | Qpctl         | QPCTL    | 13.54474647 | 10.85007813 | 14.94508892 | 10.06040545 | 12.03407133 | 18.99092416 | 14.36679515 | 5.18118393  | 5.342668547 | 9.019537102 |
| ENSMUSG00000007338 | 0.133787736  | 5.273561057  | 0.244238746 | 0.621161292 | 0.999071534 | Mrpl49        | Mrpl49        | MRPL49   | 53.47718556 | 30.11934256 | 31.84246422 | 31.63824059 | 44.66994957 | 51.4428482  | 65.491877   | 27.77114586 | 24.19914577 | 30.06512367 |
| ENSMUSG00000029060 | -0.159551344 | 4.163173577  | 0.244206093 | 0.621184621 | 0.999071534 | Mib2          | Mib2          | MI2      | 20.42238976 | 26.32477972 | 19.92678522 | 11.30928337 | 20.01318385 | 14.77071879 | 8.024696391 | 22.86629174 | 17.44224143 | 16.2090232  |
| ENSMUSG00000027428 | -0.160258209 | 3.83403766   | 0.243936077 | 0.621377614 | 0.999071534 | Rbbp9         | Rbbp9         | RBBP9    | 13.89564664 | 18.32062372 | 14.40652715 | 10.96237283 | 20.20939153 | 9.677367482 | 14.10793398 | 21.13923043 | 8.956826681 | 9.86920364  |
| ENSMUSG00000022912 | 0.126213895  | 5.159702417  | 0.243814992 | 0.621464203 | 0.999071534 | Pros1         | Pros1         | PROS1    | 41.05531962 | 42.15522157 | 35.20847524 | 25.393851   | 33.81312435 | 53.84399953 | 53.32540183 | 28.53105284 | 18.14935933 | 31.56837986 |
| ENSMUSG00000019864 | 0.245531695  | 2.826880474  | 0.243803053 | 0.621472742 | 0.999071534 | Rtn4ip1       | Rtn4ip1       | RTN4IP1  | 7.228543455 | 6.936935196 | 7.472544458 | 5.966861163 | 5.493815174 | 10.47775126 | 11.84289871 | 1.243484143 | 9.742513232 | 3.006512367 |
| ENSMUSG00000009731 | -0.202088122 | 2.916000121  | 0.243762799 | 0.621501535 | 0.999071534 | Kcnd1         | Kcnd1         | KCND1    | 5.474042616 | 5.454684085 | 9.694111729 | 11.51742969 | 6.698540692 | 8.440410737 | 2.718042326 | 7.322739954 | 7.464022234 | 7.058768167 |
| ENSMUSG00000020189 | 0.152812535  | 5.990302802  | 0.243585803 | 0.62162817  | 0.999071534 | Osbpl8        | Osbpl8        | OSBPL8   | 57.47744747 | 100.9116556 | 37.69932339 | 36.21745962 | 82.34182505 | 52.02494549 | 77.27006041 | 98.92607183 | 44.23415282 | 47.77740305 |
| ENSMUSG00000040592 | -0.400851368 | -0.029699445 | 0.243578897 | 0.621633113 | 0.999071534 | Cd79b         | Cd79b         | CD79B    | 0.280720134 | 1.363671021 | 0.605881983 | 1.665170557 | 0.981038424 | 1.164194584 | 1.229590576 | 0.621742072 | 0           | 0.653589645 |
| ENSMUSG00000033965 | 0.420070961  | 0.135025991  | 0.243551719 | 0.621652563 | 0.999071534 | Slc16a2       | Slc16a2       | SLC16A2  | 0.842160403 | 1.067220799 | 1.683005509 | 0.20814632  | 0.457817931 | 2.764962138 | 1.359021163 | 1.243484143 | 0           | 0.392153787 |
| ENSMUSG00000038518 | -0.128045393 | 4.497465903  | 0.243464033 | 0.621715326 | 0.999071534 | Jarid2        | Jarid2        | JARID2   | 25.54553221 | 28.28135118 | 21.60979073 | 21.1615425  | 25.3761939  | 21.24655116 | 13.39606575 | 28.39288793 | 17.44224143 | 22.48348379 |
| ENSMUSG00000066894 | 0.158033812  | 3.288254682  | 0.243428207 | 0.621740973 | 0.999071534 | Vsig10        | Vsig10        | VSIG10   | 10.6673651  | 8.47847635  | 7.203263577 | 8.880909638 | 12.16487646 | 11.86023233 | 7.765835218 | 9.049801264 | 10.52819978 | 9.542408818 |
| ENSMUSG00000042579 | 0.217141611  | 2.041210952  | 0.243376417 | 0.621778054 | 0.999071534 | 4632404H12Rik | 4632404H12Rik |          | 2.105401006 | 3.201662398 | 4.645095204 | 3.191576901 | 6.017035667 | 3.492583753 | 4.206494076 | 3.385040167 | 3.69272679  | 5.686229912 |
| ENSMUSG00000054452 | -0.136445363 | 8.448997449  | 0.243329658 | 0.621811536 | 0.999071534 | Aes           | Aes           | AES      | 303.318105  | 317.9132181 | 430.78209   | 384.2381061 | 461.0226567 | 299.7801055 | 249.9951787 | 417.6034247 | 239.9486727 | 392.3498639 |
| ENSMUSG00000083394 | 0.36459477   | 0.636023604  | 0.243317303 | 0.621820383 | 0.999071534 | Gm11703       | Gm11703       |          | 2.245761073 | 0.5336104   | 0.605881983 | 1.387642131 | 1.700466601 | 0.509335131 | 1.48845175  | 0.27632981  | 1.021392516 | 4.313691657 |
| ENSMUSG00000097727 | -0.342579383 | 0.778048913  | 0.243287582 | 0.621841668 | 0.999071534 | F630040K05Rik | F630040K05Rik |          | 1.965040939 | 1.778701332 | 3.366011017 | 0.763203172 | 1.373453794 | 0.145524323 | 0.582437641 | 1.657978857 | 1.964216377 | 1.960768935 |
| ENSMUSG00000079614 | -0.124013235 | 6.93065664   | 0.243188735 | 0.621912469 | 0.999071534 | Seh1l         | Seh1l         | SEH1L    | 90.3918832  | 167.3757954 | 138.6796539 | 118.3658738 | 145.3244919 | 117.0743179 | 109.4982766 | 154.4683636 | 88.93971757 | 91.50255031 |
| ENSMUSG00000020523 | 0.132773511  | 6.47536237   | 0.243047877 | 0.622013392 | 0.999071534 | Fam114a2      | Fam114a2      | FAM114A2 | 72.91705485 | 73.87539533 | 101.3842518 | 95.74730704 | 94.83371431 | 62.13888594 | 61.5442441  | 114.4696236 | 93.02528764 | 104.901138  |
| ENSMUSG00000098001 | -0.250653231 | 1.83829241   | 0.243033111 | 0.622023974 | 0.999071534 | Gm27048       | Gm27048       |          | 2.596661241 | 4.683913508 | 4.577774983 | 4.02416218  | 3.466335765 | 1.964578361 | 1.035444696 | 5.526596192 | 2.357059653 | 3.986896835 |
| ENSMUSG00000039089 | 0.157819771  | 3.66480665   | 0.242933221 | 0.622095568 | 0.999071534 | L3mbt13       | L3mbt13       | L3MBTL3  | 11.01826527 | 9.604987194 | 16.42613376 | 10.33793388 | 14.25775843 | 15.42557824 | 8.542418739 | 14.09282029 | 15.32088774 | 9.607767782 |
| ENSMUSG00000068882 | 0.128242432  | 7.665633617  | 0.242914057 | 0.622109306 | 0.999071534 | Ssb           | Ssb           | SSB      | 168.1513604 | 171.5853885 | 266.7900332 | 188.4418014 | 210.7270535 | 232.2568196 | 277.6933243 | 166.8341225 | 157.9229967 | 194.8350732 |
| ENSMUSG00000020493 | 0.125894751  | 4.973825972  | 0.24288257  | 0.622131879 | 0.999071534 | Prr11         | Prr11         | PRR11    | 33.61623607 | 30.29721269 | 29.08233519 | 22.75733095 | 40.48418563 | 56.60896166 | 39.60575961 | 24.45518815 | 20.19214436 | 22.67956068 |
| ENSMUSG00000026779 | 0.153900479  | 3.878895066  | 0.242808304 | 0.622185127 | 0.999071534 | Mastl         | Mastl         | MASTL    | 14.52726694 | 13.51813012 | 15.95489222 | 9.85225913  | 18.18191212 | 21.97417278 | 22.52092213 | 14.16190274 | 8.406846095 | 9.150255031 |
| ENSMUSG00000026341 | 0.12590575   | 9.365384303  | 0.242734228 | 0.622238248 | 0.999071534 | Actr3         | Actr3         | ACTR3    | 629.795621  | 689.9582468 | 625.2702065 | 586.4175646 | 748.5323175 | 746.2487286 | 878.6395396 | 696.6274499 | 469.2120082 | 556.5969417 |

|                    |              |              |             |             |             |           |           |         |             |             |             |             |             |             |             |             |             |             |
|--------------------|--------------|--------------|-------------|-------------|-------------|-----------|-----------|---------|-------------|-------------|-------------|-------------|-------------|-------------|-------------|-------------|-------------|-------------|
| ENSMUSG00000027074 | 0.125507937  | 4.791292092  | 0.242687379 | 0.62227185  | 0.999071534 | Slc43a3   | Slc43a3   | SLC43A3 | 34.7391166  | 22.64879696 | 30.22677893 | 20.88401407 | 28.90793223 | 44.31215637 | 35.98170317 | 22.79720929 | 20.11357571 | 19.1501766  |
| ENSMUSG00000054976 | 0.905911762  | -0.837111002 | 0.242656388 | 0.62229408  | 0.999071534 | Nyap2     | Nyap2     | NYAP2   | 1.543960738 | 0           | 0           | 0           | 0           | 0.509335131 | 2.265035272 | 0           | 0           | 0           |
| ENSMUSG00000043931 | -0.370838892 | 0.141466539  | 0.242630852 | 0.622312398 | 0.999071534 | Gimap7    | Gimap7    | GIMAP7  | 2.245761073 | 0.830060622 | 0.942483085 | 1.179495811 | 0.457817931 | 1.236956746 | 0.453007054 | 0.759906976 | 0.078568655 | 1.699333077 |
| ENSMUSG00000028343 | 0.113092741  | 6.547810036  | 0.242435484 | 0.622452588 | 0.999071534 | Erp44     | Erp44     | ERP44   | 78.32091743 | 101.1488158 | 96.26791509 | 98.80011973 | 90.38634013 | 80.54771281 | 107.9451095 | 99.27148409 | 92.86815033 | 80.06473152 |
| ENSMUSG00000027498 | 0.126543911  | 4.213882507  | 0.24239752  | 0.622479837 | 0.999071534 | Cstf1     | Cstf1     | CSTF1   | 18.45734882 | 15.23754141 | 18.37842015 | 14.70900659 | 25.04918109 | 28.30448083 | 16.76126101 | 17.33969555 | 13.67094599 | 18.69266385 |
| ENSMUSG00000064179 | 0.494989089  | -0.485016298 | 0.242368979 | 0.622500325 | 0.999071534 | Tnnt1     | Tnnt1     | TNNT1   | 1.684320805 | 0.474320355 | 0.134640441 | 0.277528426 | 0           | 0.218286485 | 1.100159989 | 0.621742072 | 1.021392516 | 0.196076894 |
| ENSMUSG00000034639 | -0.25458193  | 1.091014463  | 0.242275295 | 0.622567585 | 0.999071534 | Setmar    | Setmar    | SETMAR  | 3.017741442 | 1.719411288 | 2.423527932 | 2.636520049 | 1.438856355 | 1.600767553 | 2.523896446 | 1.657978857 | 0.785686551 | 2.287563758 |
| ENSMUSG00000039629 | 0.396525795  | 0.343076271  | 0.242180551 | 0.622635623 | 0.999071534 | Strip2    | Strip2    | STRIP2  | 0.842160403 | 1.126510844 | 0.538561763 | 2.081463196 | 0.523220493 | 0.654859454 | 0.647152935 | 0.621742072 | 3.535589479 | 0.261435858 |
| ENSMUSG00000083161 | 0.5173959    | -0.421997066 | 0.24207177  | 0.622713762 | 0.999071534 | Gm11427   | Gm11427   |         | 0.631620302 | 0.296450222 | 1.144443746 | 0           | 0.523220493 | 1.819054038 | 1.29430587  | 0.069082452 | 0           | 0.588230681 |
| ENSMUSG00000046561 | 0.187584244  | 2.665958552  | 0.242028205 | 0.622745061 | 0.999071534 | Arsj      | Arsj      | ARSJ    | 7.158363421 | 4.921073686 | 8.145746661 | 3.330341114 | 6.801866406 | 8.294886414 | 8.024696391 | 4.214029596 | 4.792687961 | 7.058768167 |
| ENSMUSG00000091577 | 0.278162858  | 0.832103558  | 0.241905777 | 0.622833038 | 0.999071534 | Gm6211    | Gm6211    |         | 2.17558104  | 0.770770577 | 2.625488593 | 0.832585279 | 1.373453794 | 1.964578361 | 1.229590576 | 1.588896405 | 1.414235792 | 2.548999616 |
| ENSMUSG00000026171 | 0.128892634  | 4.886790293  | 0.241877168 | 0.6228536   | 0.999071534 | Rnf25     | Rnf25     | RNF25   | 23.08923104 | 26.38406976 | 33.72743039 | 29.48739528 | 33.15909873 | 21.97417278 | 22.45620684 | 33.0904947  | 27.73473525 | 40.39184006 |
| ENSMUSG00000021693 | 0.110320605  | 6.147602229  | 0.241875237 | 0.622854988 | 0.999071534 | Klf2a     | Klf2a     | KLF2A   | 55.30186643 | 66.81988005 | 73.31171995 | 74.72452875 | 82.53803273 | 79.09246957 | 55.39629122 | 88.49462152 | 64.0334539  | 65.88183622 |
| ENSMUSG00000071650 | -0.117076577 | 7.405237348  | 0.241728192 | 0.6229607   | 0.999071534 | Ganab     | Ganab     | GANAB   | 180.8539464 | 229.689632  | 164.2613376 | 148.8246185 | 194.2456079 | 218.2137224 | 157.6464549 | 149.4253445 | 110.2318231 | 163.0052575 |
| ENSMUSG00000083805 | 0.557348131  | -0.650604741 | 0.241668296 | 0.623003772 | 0.999071534 | Gm14848   | Gm14848   |         | 0.140360067 | 0.118580089 | 0           | 0.416292639 | 1.438856355 | 0.582097292 | 0           | 0.759906976 | 0.15713731  | 1.437897219 |
| ENSMUSG00000071649 | 0.108237912  | 5.570813543  | 0.241634108 | 0.623028359 | 0.999071534 | B3gat3    | B3gat3    | B3GAT3  | 66.17977163 | 37.87204833 | 44.36402521 | 48.7756209  | 39.63395233 | 52.82532927 | 55.78458298 | 43.31469765 | 35.43446345 | 51.3721461  |
| ENSMUSG00000037138 | -0.376311692 | -0.19626521  | 0.241536906 | 0.623098278 | 0.999071534 | Aff3      | Aff3      | AFF3    | 0.210540101 | 1.067220799 | 0.740522424 | 1.595788451 | 0.654025616 | 0.509335131 | 0.258861174 | 1.105319238 | 0.471411931 | 0.71894861  |
| ENSMUSG00000026980 | -0.112242683 | 6.070319182  | 0.241273682 | 0.623287704 | 0.999071534 | Ly75      | Ly75      | LY75    | 58.74068807 | 70.73302298 | 87.11236512 | 77.43043091 | 66.51440514 | 97.35577212 | 73.06356634 | 48.97945875 | 50.20537061 | 47.90812098 |
| ENSMUSG00000029047 | 0.207427381  | 2.105989468  | 0.241221275 | 0.623325434 | 0.999071534 | Pex10     | Pex10     | PEX10   | 4.35116208  | 3.913142931 | 2.086926831 | 5.064893778 | 4.643581873 | 5.23887563  | 4.983077598 | 2.763298096 | 3.535589479 | 5.22871716  |
| ENSMUSG00000086324 | -0.204327097 | 5.80017899   | 0.241157759 | 0.623371168 | 0.999071534 | Gm15564   | Gm15564   |         | 54.03862583 | 36.28550718 | 60.92479941 | 118.0189632 | 34.20553971 | 28.45000516 | 20.19117157 | 59.75632132 | 81.78996996 | 43.52907036 |
| ENSMUSG00000081665 | -0.519104776 | 1.917132113  | 0.241018512 | 0.623471458 | 0.999071534 | Gm15922   | Gm15922   | LILRA4  | 6.105662918 | 5.158233863 | 4.712415424 | 2.358991623 | 3.989556257 | 8.513172898 | 7.571689337 | 0           | 0           | 0           |
| ENSMUSG00000091191 | 0.406694318  | 0.059319628  | 0.240499558 | 0.623845541 | 0.999071534 | Gm17334   | Gm17334   |         | 1.122880537 | 0.237160178 | 1.077123525 | 0.138764213 | 1.569661478 | 0.582097292 | 0.129430587 | 1.657978857 | 1.178529826 | 1.30717929  |
| ENSMUSG00000059689 | -0.113640526 | 4.807607506  | 0.240416778 | 0.623905258 | 0.999071534 | Zfp637    | Zfp637    | ZNF32   | 35.1601968  | 22.88595714 | 29.48625651 | 29.55677739 | 33.42070898 | 27.28581057 | 32.48707733 | 25.8368372  | 18.14935933 | 26.1435858  |
| ENSMUSG00000039737 | 0.141200245  | 5.053283645  | 0.240359543 | 0.623946554 | 0.999071534 | Prkrip1   | Prkrip1   | PRKRIP1 | 45.33630167 | 27.15484034 | 32.98690797 | 30.94441952 | 27.01125794 | 36.01726995 | 61.2206763  | 19.13583931 | 20.89926226 | 32.48340536 |
| ENSMUSG00000092202 | 0.434954317  | -0.21810364  | 0.240129458 | 0.624112629 | 0.999071534 | Stk19-ps1 | Stk19-ps1 |         | 0.842160403 | 0.948640711 | 1.009803305 | 0.20814632  | 0.196207685 | 1.746291877 | 1.29430587  | 0.621742072 | 0.549980586 | 0           |
| ENSMUSG00000050910 | -0.123547387 | 5.192948745  | 0.24000944  | 0.624199296 | 0.999071534 | Cdr2l     | Cdr2l     | CDR2L   | 36.42343741 | 40.02077997 | 47.3261149  | 27.19778577 | 47.15524691 | 39.36432938 | 19.15572687 | 41.24222408 | 31.42746204 | 36.47030219 |
| ENSMUSG00000026131 | 0.144777533  | 7.261479909  | 0.239747119 | 0.624388818 | 0.999071534 | Dst       | Dst       | DST     | 104.0769897 | 159.4902195 | 151.537816  | 152.363106  | 187.966962  | 145.2332744 | 79.47038039 | 205.5893783 | 164.1299205 | 166.7307185 |
| ENSMUSG00000009145 | 0.231546475  | 2.62034025   | 0.239604578 | 0.624491855 | 0.999071534 | Dqx1      | Dqx1      | DQX1    | 8.000523824 | 3.083082309 | 7.674505119 | 5.481186417 | 4.51277675  | 4.584016176 | 2.588611739 | 4.075864691 | 9.821081887 | 8.888819173 |
| ENSMUSG00000048440 | -0.139129836 | 4.514933764  | 0.239358266 | 0.624669993 | 0.999071534 | Cyp4f16   | Cyp4f16   | CYP4F8  | 34.87947667 | 26.91768016 | 22.08103227 | 18.80255087 | 21.58284533 | 35.21688618 | 29.31602795 | 14.57639746 | 11.62816095 | 17.64692042 |
| ENSMUSG00000057614 | 0.462835921  | 0.352288992  | 0.239266596 | 0.62473632  | 0.999071534 | Gnail     | Gnail     | GNAI1   | 1.543960738 | 1.245090933 | 1.615685288 | 0           | 0.588623054 | 1.964578361 | 3.559341141 | 0.414494714 | 0           | 0.784307574 |
| ENSMUSG00000058298 | 0.165443423  | 3.001638931  | 0.238969431 | 0.624951439 | 0.999071534 | Mcm9      | Mcm9      | MCM9    | 8.140883891 | 8.241316173 | 5.85685917  | 7.770795933 | 8.567735569 | 11.05984855 | 8.73656462  | 6.35558562  | 4.871256616 | 10.06528053 |
| ENSMUSG00000018287 | 0.115109078  | 6.029622479  | 0.238936923 | 0.624974981 | 0.999071534 | Spag7     | Spag7     | SPAG7   | 54.74042616 | 55.19903134 | 75.19668612 | 64.17844856 | 75.34375096 | 51.51561036 | 58.50262531 | 74.95446085 | 64.97627777 | 70.5223227  |
| ENSMUSG00000061288 | -0.112419041 | 4.889491595  | 0.238655672 | 0.62517875  | 0.999071534 | Taok3     | Taok3     | TAOK3   | 28.77381375 | 34.32893571 | 28.94769475 | 27.33654998 | 40.15717282 | 39.43709155 | 20.77360921 | 28.46197039 | 24.98483232 | 24.37889376 |
| ENSMUSG00000079597 | -0.229632385 | 2.954516218  | 0.238581044 | 0.625232843 | 0.999071534 | Gm5483    | Gm5483    | CSTA    | 16.49230788 | 10.25717768 | 5.789538949 | 6.383153803 | 3.989556257 | 2.255627007 | 6.600959935 | 8.566224097 | 6.992610304 | 8.104511599 |
| ENSMUSG00000092035 | -0.446975082 | -0.479332302 | 0.238388154 | 0.625372706 | 0.999071534 | Peg10     | Peg10     | PEG10   | 0.210540101 | 0.652190488 | 1.077123525 | 0.971349492 | 0.523220493 | 0.9459081   | 1.100159989 | 0           | 0.235705965 | 0.196076894 |
| ENSMUSG00000057315 | -0.167402889 | 3.732498614  | 0.238288228 | 0.625445189 | 0.999071534 | Arhgap24  | Arhgap24  | ARHGA24 | 10.17610486 | 19.15068434 | 12.31960032 | 13.11321814 | 17.59328907 | 11.93299449 | 7.118682283 | 20.58657081 | 6.914041649 | 13.46394669 |
| ENSMUSG00000093798 | 0.170102858  | 9.537161448  | 0.238209095 | 0.625502603 | 0.999071534 | Gm8355    | Gm8355    |         | 534.2805954 | 388.4098089 | 992.0980872 | 822.2473447 | 877.3099612 | 432.1344773 | 543.2848888 | 968.7432299 | 799.121791  | 926.5286808 |
| ENSMUSG00000027589 | 0.141754249  | 4.790028962  | 0.238029809 | 0.625632726 | 0.999071534 | Pcmt2     | Pcmt2     | PCMTD2  | 18.80824899 | 28.22206114 | 24.57188042 | 31.91576901 | 31.91645006 | 18.918162   | 21.16190097 | 42.62387313 | 26.00622484 | 27.32004716 |
| ENSMUSG00000022556 | -0.100812029 | 5.449002742  | 0.23793534  | 0.625701314 | 0.999071534 | Hsf1      | Hsf1      | HSF1    | 51.51214462 | 42.3309171  | 49.61500239 | 40.10285759 | 50.94859548 | 59.08287516 | 34.49325142 | 39.16975051 | 30.87748145 | 42.67940382 |

|                    |              |              |             |             |             |               |               |          |             |             |             |             |             |             |             |             |             |             |
|--------------------|--------------|--------------|-------------|-------------|-------------|---------------|---------------|----------|-------------|-------------|-------------|-------------|-------------|-------------|-------------|-------------|-------------|-------------|
| ENSMUSG00000030735 | 1.001776367  | 0.093514312  | 0.237838654 | 0.62577153  | 0.999071534 | Gm9755        | Gm9755        | TUFM     | 0           | 0           | 0           | 3.052812688 | 0           | 0           | 0           | 5.941090906 | 0           | 0           |
| ENSMUSG00000028842 | -0.136096076 | 3.649916746  | 0.237769207 | 0.625821974 | 0.999071534 | Ago3          | Ago3          | AGO3     | 11.57970553 | 15.83044186 | 12.72352164 | 13.87642131 | 13.40752513 | 12.87890259 | 11.58403753 | 12.64208879 | 8.406846095 | 11.89533154 |
| ENSMUSG00000097289 | 0.186777341  | 2.984477049  | 0.237729879 | 0.625850545 | 0.999071534 | 2010300F17Rik | 2010300F17Rik |          | 8.842684226 | 8.122736084 | 6.866662475 | 6.938210655 | 7.063476652 | 14.26138366 | 11.38989165 | 3.385040167 | 6.285492408 | 5.94766577  |
| ENSMUSG00000062284 | 0.457982807  | -0.685482796 | 0.237688151 | 0.625880863 | 0.999071534 | Gm6030        | Gm6030        |          | 0.070180034 | 0.177870133 | 1.346404407 | 0.277528426 | 0.261610246 | 0.218286485 | 0.776583522 | 1.036236786 | 0.392843275 | 0.261435858 |
| ENSMUSG00000032463 | -0.129180069 | 4.650466528  | 0.237529868 | 0.625995894 | 0.999071534 | Faim          | Faim          | FAIM     | 23.29977114 | 17.43127306 | 34.40063259 | 34.76043538 | 24.65676572 | 29.75972406 | 17.99085159 | 21.07014798 | 22.3920667  | 24.05209894 |
| ENSMUSG00000052085 | -0.132609069 | 5.028926775  | 0.237341171 | 0.626133091 | 0.999071534 | Dock8         | Dock8         | DOCK8    | 40.14297919 | 45.0011437  | 28.61109365 | 20.46772143 | 43.81971627 | 55.5902914  | 25.43311034 | 23.48803381 | 16.9708295  | 34.64025119 |
| ENSMUSG00000021668 | 0.144896284  | 3.963660641  | 0.237007431 | 0.62637591  | 0.999071534 | Polk          | Polk          | POLK     | 13.54474647 | 15.47470159 | 16.02221244 | 11.37866547 | 20.14398897 | 16.51701067 | 19.47930334 | 13.60924312 | 17.75651605 | 9.934562605 |
| ENSMUSG00000038301 | 0.144250052  | 5.672385675  | 0.236980874 | 0.626395241 | 0.999071534 | Snx10         | Snx10         | SNX10    | 83.79496005 | 37.70846824 | 41.60389617 | 48.42871037 | 39.76475745 | 59.88325893 | 93.06059202 | 31.70884565 | 36.84869924 | 39.47681456 |
| ENSMUSG00000027259 | -0.204616834 | 2.397342584  | 0.236973396 | 0.626400685 | 0.999071534 | Adal          | Adal          | ADAL     | 7.789983723 | 6.403242796 | 5.99149961  | 2.705902155 | 5.886230544 | 5.675448599 | 7.701119924 | 3.246875263 | 3.457020824 | 3.202589261 |
| ENSMUSG00000032112 | -0.163518571 | 5.60931768   | 0.236834068 | 0.626502127 | 0.999071534 | Trappc4       | Trappc4       | TRAPPC4  | 89.7602629  | 46.66126495 | 41.40193551 | 44.5433124  | 45.84719568 | 71.52520478 | 81.28240861 | 24.93876531 | 15.47802505 | 39.08466077 |
| ENSMUSG00000023307 | 0.101464084  | 6.373702447  | 0.236788841 | 0.626535064 | 0.999071534 | 5-Mar         | 5-Mar         | 5-Mar    | 83.65459998 | 70.14012253 | 81.92870816 | 86.24195844 | 92.41381954 | 93.42661539 | 74.16372633 | 87.52746718 | 63.09063004 | 97.18878022 |
| ENSMUSG00000037990 | 0.234348124  | 1.867619846  | 0.236638217 | 0.626644785 | 0.999071534 | Sh3rf3        | Sh3rf3        | SH3RF3   | 4.070441945 | 4.743203553 | 2.288887492 | 0.971349492 | 4.90519212  | 4.729540499 | 3.753487022 | 3.039627905 | 2.357059653 | 4.771204409 |
| ENSMUSG00000015126 | 0.118572325  | 4.976022938  | 0.236608455 | 0.62666647  | 0.999071534 | Tsr3          | Tsr3          | TSR3     | 27.01931291 | 25.07968878 | 37.09344141 | 32.8871185  | 33.5515141  | 26.41266463 | 29.05716677 | 27.77114586 | 32.60599187 | 38.69250699 |
| ENSMUSG00000022091 | -0.132053969 | 5.439646066  | 0.236576081 | 0.626690061 | 0.999071534 | Sorbs3        | Sorbs3        | SORBS3   | 35.93217717 | 46.36481473 | 52.30781121 | 46.27786507 | 53.82630819 | 46.49502121 | 20.96775509 | 51.05193232 | 24.4385174  | 58.49627323 |
| ENSMUSG00000083626 | -0.355944207 | 2.675088927  | 0.236494933 | 0.6267492   | 0.999071534 | Gm4459        | Gm4459        |          | 14.66762701 | 9.249246928 | 7.337904017 | 2.081463196 | 3.466335765 | 8.440410737 | 13.33135046 | 4.214029596 | 0           | 2.091486864 |
| ENSMUSG00000038267 | -0.116548038 | 4.477425882  | 0.236366372 | 0.626842919 | 0.999071534 | Slc22a23      | Slc22a23      | SLC22A23 | 28.49309362 | 19.68429474 | 22.68691426 | 23.72868044 | 25.04918109 | 28.37724299 | 18.57328923 | 15.88896405 | 17.99222202 | 22.74491965 |
| ENSMUSG00000033845 | 0.119516814  | 5.916377456  | 0.236104351 | 0.627034025 | 0.999071534 | Mrpl15        | Mrpl15        | MRPL15   | 70.32039361 | 41.50303108 | 58.43395126 | 71.46356975 | 57.16183883 | 56.24515086 | 90.79555675 | 44.42001689 | 50.9124885  | 59.34593977 |
| ENSMUSG00000062093 | 0.352941327  | 0.169943331  | 0.236008552 | 0.62710393  | 0.999071534 | Gm10110       | Gm10110       | PABPC4   | 0.491260235 | 0.592900444 | 1.077123525 | 0.832585279 | 1.569661478 | 1.164194584 | 1.229590576 | 0.759906976 | 1.885647722 | 0.196076894 |
| ENSMUSG00000024778 | -0.177455503 | 3.283450797  | 0.235970896 | 0.627131412 | 0.999071534 | Fas           | Fas           | FAS      | 13.33420637 | 9.842147372 | 5.85685917  | 12.6969255  | 11.11843547 | 7.712789121 | 13.39606575 | 8.704389002 | 4.16413872  | 9.934562605 |
| ENSMUSG00000023286 | 0.102130716  | 5.93350215   | 0.235820118 | 0.627241481 | 0.999071534 | Ube2j2        | Ube2j2        | UBE2J2   | 60.91626911 | 48.91428664 | 79.1012589  | 59.3217011  | 56.7040209  | 73.05321017 | 59.40863941 | 57.13118813 | 54.44807798 | 61.11063181 |
| ENSMUSG00000031134 | 0.127823877  | 4.729994647  | 0.235765679 | 0.627281233 | 0.999071534 | RbmX          | RbmX          |          | 22.52779077 | 16.24547217 | 23.831358   | 32.95650061 | 34.99037045 | 34.27097808 | 21.61490802 | 27.4257336  | 19.17075184 | 32.2219695  |
| ENSMUSG00000071419 | -0.316255022 | 0.350370118  | 0.23565111  | 0.627364909 | 0.999071534 | Rps15-ps2     | Rps15-ps2     |          | 1.403600671 | 1.304380977 | 1.144443746 | 1.942698983 | 0.719428178 | 0.654859454 | 2.135604685 | 0.552659619 | 0.785686551 | 0.71894861  |
| ENSMUSG00000039693 | 0.134103233  | 3.962973406  | 0.235648162 | 0.627367063 | 0.999071534 | Msantd3       | Msantd3       | MSANTD3  | 14.52726694 | 15.17825137 | 14.40652715 | 15.47220976 | 16.93926345 | 17.60844309 | 23.29750565 | 13.54016067 | 11.70672961 | 12.48356222 |
| ENSMUSG00000097388 | -0.27393519  | 0.609450499  | 0.235645756 | 0.627368821 | 0.999071534 | Gm3200        | Gm3200        |          | 1.19306057  | 2.668051998 | 1.683005509 | 1.110113705 | 1.24264867  | 1.528005392 | 1.29430587  | 1.519813953 | 0.864255206 | 0.915025503 |
| ENSMUSG00000057969 | -0.269778603 | 1.449482019  | 0.235563225 | 0.627429115 | 0.999071534 | Sema3b        | Sema3b        | SEMA3B   | 2.737021308 | 4.209593153 | 3.567971678 | 2.497755836 | 1.700466601 | 1.091432423 | 1.229590576 | 4.697606763 | 1.099961171 | 3.071871332 |
| ENSMUSG00000036721 | 0.197141197  | 2.283505585  | 0.23540233  | 0.627546696 | 0.999071534 | Zscan12       | Zscan12       | ZSCAN12  | 5.403862583 | 5.098943819 | 3.096730136 | 4.856747458 | 4.447374189 | 7.931075606 | 6.018522294 | 4.90485412  | 2.042785033 | 4.444409586 |
| ENSMUSG00000098055 | 0.472754578  | -0.574993096 | 0.235257737 | 0.627652406 | 0.999071534 | Gm26947       | Gm26947       |          | 0.771980369 | 1.185800888 | 0.134640441 | 0.138764213 | 0.130805123 | 0.509335131 | 0.064715293 | 1.588896405 | 0.549980586 | 0.261435858 |
| ENSMUSG00000046694 | 0.240840282  | 2.535626712  | 0.235251283 | 0.627657125 | 0.999071534 | Fam46b        | Fam46b        | FAM46B   | 8.561964092 | 4.683913508 | 4.039213221 | 7.285121188 | 2.223687094 | 13.6065242  | 6.406814054 | 2.279720929 | 2.199922343 | 7.189486096 |
| ENSMUSG00000079108 | -0.105145802 | 6.589065564  | 0.235211192 | 0.627686444 | 0.999071534 | Srp54b        | Srp54b        | SRP54    | 92.28674411 | 120.5366603 | 95.39275222 | 91.44561643 | 118.6402467 | 125.8785394 | 94.22546731 | 97.33717542 | 57.82653015 | 81.04511599 |
| ENSMUSG00000025290 | 0.154192764  | 10.81199369  | 0.235112034 | 0.627758969 | 0.999071534 | Rps24         | Rps24         |          | 2301.83492  | 1387.505619 | 1667.791139 | 2199.82907  | 1233.819325 | 1115.152887 | 2469.082592 | 1552.835365 | 1908.275495 | 1844.887491 |
| ENSMUSG00000064141 | 0.193457099  | 2.14995807   | 0.235039679 | 0.627811902 | 0.999071534 | Zfp69         | Zfp69         | ZFP69    | 3.087921476 | 3.379532531 | 4.241173882 | 5.273040098 | 4.774386997 | 5.675448599 | 3.753487022 | 4.075864691 | 4.32127603  | 4.379050622 |
| ENSMUSG00000036093 | -0.113077074 | 6.095609254  | 0.234747219 | 0.628025962 | 0.999071534 | Arl5a         | Arl5a         | ARL5A    | 78.39109747 | 84.42902324 | 70.08034938 | 60.77872534 | 75.6053612  | 87.46011815 | 94.48432848 | 50.08477799 | 37.39867983 | 55.03224811 |
| ENSMUSG00000060678 | 0.758999563  | -0.974263649 | 0.234640926 | 0.628103801 | 0.999071534 | Hist1h4c      | Hist1h4c      |          | 0           | 0.118580089 | 0           | 1.110113705 | 0.261610246 | 0           | 0           | 0.621742072 | 1.492804447 | 0           |
| ENSMUSG00000040411 | -0.163255934 | 3.100419103  | 0.23452351  | 0.628189812 | 0.999071534 | Gramd1b       | Gramd1b       | GRAMD1B  | 8.281243958 | 10.79078808 | 8.684308424 | 10.12978756 | 8.306125323 | 11.78747017 | 6.147952881 | 9.53337843  | 4.556981996 | 7.385562989 |
| ENSMUSG00000074129 | 0.152463952  | 11.23667494  | 0.234518366 | 0.62819358  | 0.999071534 | Rpl13a        | Rpl13a        | RPL13A   | 3187.857844 | 1899.653023 | 2136.945754 | 2885.809958 | 1706.876053 | 1493.58889  | 3013.985363 | 2257.683627 | 2703.390285 | 2412.072585 |
| ENSMUSG00000036023 | 0.118756207  | 4.765067281  | 0.234487359 | 0.628216298 | 0.999071534 | Parp2         | Parp2         | PARP2    | 34.03731627 | 21.58157616 | 27.53397012 | 19.84328247 | 32.43967055 | 37.18146454 | 32.35764674 | 26.18224946 | 15.32088774 | 28.1697137  |
| ENSMUSG00000082193 | 0.351452051  | -0.009262181 | 0.234455639 | 0.628239541 | 0.999071534 | Rpl5-ps1      | Rpl5-ps1      |          | 1.19306057  | 0.889350666 | 0.336601102 | 0.485674746 | 1.046440986 | 0.9459081   | 1.941458804 | 0.27632981  | 0.785686551 | 0.71894861  |
| ENSMUSG00000031948 | -0.13028999  | 7.096870657  | 0.234400969 | 0.628279605 | 0.999071534 | Kars          | Kars          | KARS     | 155.9400345 | 169.569527  | 137.6698506 | 116.7007032 | 165.0106629 | 227.3089926 | 167.6773254 | 93.67580545 | 68.11902397 | 101.0449591 |
| ENSMUSG00000038764 | -0.295258753 | 1.124202874  | 0.234329231 | 0.628332184 | 0.999071534 | Ptpn3         | Ptpn3         | PTPN3    | 1.19306057  | 3.438822576 | 3.971893    | 0.763203172 | 2.354492217 | 4.29296753  | 1.553167044 | 0.759906976 | 0.628549241 | 2.222204793 |

|                     |              |              |             |             |             |               |               |            |             |             |             |             |             |             |             |             |             |             |
|---------------------|--------------|--------------|-------------|-------------|-------------|---------------|---------------|------------|-------------|-------------|-------------|-------------|-------------|-------------|-------------|-------------|-------------|-------------|
| ENSMUSG00000022177  | 0.133387766  | 4.606498778  | 0.234250101 | 0.628390194 | 0.999071534 | Haus4         | Haus4         | HAUS4      | 24.0717515  | 13.16238986 | 26.92808814 | 26.22643628 | 29.36575016 | 31.65154026 | 18.57328923 | 19.27400422 | 25.29910694 | 27.38540613 |
| ENSMUSG00000043372  | -0.271016384 | 0.911007237  | 0.234236072 | 0.62840048  | 0.999071534 | Hexim2        | Hexim2        | HEXIM2     | 1.403600671 | 2.312311732 | 1.413724627 | 2.081463196 | 2.681505025 | 0.873145938 | 2.523896446 | 2.003391119 | 0.628549241 | 1.568615148 |
| ENSMUSG000000035877 | -0.152064663 | 3.527990537  | 0.234215026 | 0.628415911 | 0.999071534 | Zhx3          | Zhx3          | ZHX3       | 9.404124495 | 17.78701332 | 14.20456649 | 10.33793388 | 10.59521498 | 16.73529715 | 9.966155196 | 9.740625788 | 7.228316269 | 9.803844676 |
| ENSMUSG00000037225  | -0.149489598 | 3.802864657  | 0.234178206 | 0.628442911 | 0.999071534 | Fgf2          | Fgf2          | FGF2       | 11.9306057  | 21.99660648 | 10.09803305 | 12.6969255  | 18.96674286 | 16.0804377  | 9.772009315 | 10.43145031 | 12.96382809 | 13.92145944 |
| ENSMUSG00000031441  | 0.113904007  | 6.616843542  | 0.234083751 | 0.628512183 | 0.999071534 | Atp11a        | Atp11a        | ATP11A     | 87.72504193 | 92.96678963 | 108.9241165 | 102.1304608 | 95.94555786 | 110.380199  | 61.73838998 | 111.5681606 | 96.32517115 | 107.8422914 |
| ENSMUSG00000048807  | 0.119905468  | 5.846087465  | 0.233804442 | 0.628717129 | 0.999071534 | Slc35e4       | Slc35e4       | SLC35E4    | 72.00471441 | 50.93014815 | 56.88558619 | 45.584044   | 61.28220022 | 85.71382627 | 89.43653559 | 36.95911203 | 37.55581714 | 46.66630066 |
| ENSMUSG00000031631  | -0.120056365 | 4.464991991  | 0.233727694 | 0.62877347  | 0.999071534 | 4933411K20Rik | Cfap97        | CFAP97     | 19.58022936 | 27.92561092 | 21.27318963 | 28.30789947 | 21.1250274  | 24.88465924 | 19.54401863 | 19.68849893 | 13.35667137 | 25.42463719 |
| ENSMUSG00000083854  | 0.459014535  | 0.110308509  | 0.233622949 | 0.628850382 | 0.999071534 | Dnajc19-ps    | Dnajc19-ps    |            | 0.491260235 | 0.5336104   | 0.673202203 | 0           | 2.485297341 | 0.291048646 | 1.100159989 | 1.312566595 | 0.078568655 | 2.483640651 |
| ENSMUSG00000018427  | -0.212963107 | 3.243693262  | 0.2334774   | 0.628957291 | 0.999071534 | Ypel2         | Ypel2         | YPEL2      | 3.789721811 | 11.79871884 | 10.23267349 | 12.21125075 | 13.7999405  | 5.166113468 | 4.206494076 | 14.64547991 | 5.735511822 | 11.30710086 |
| ENSMUSG00000021476  | 0.12665763   | 4.212507342  | 0.233420649 | 0.628998987 | 0.999071534 | Habp4         | Habp4         | HABP4      | 22.73833087 | 17.37198301 | 16.49345398 | 14.15394974 | 21.05962483 | 29.75972406 | 17.99085159 | 14.43823255 | 12.17814154 | 21.04558657 |
| ENSMUSG00000027495  | -0.173121762 | 3.842564783  | 0.23335019  | 0.629061913 | 0.999071534 | Fam210b       | Fam210b       | FAM210B    | 14.38690688 | 27.86632087 | 6.732022034 | 8.325852786 | 21.64824789 | 16.37148634 | 11.64875283 | 14.23098519 | 10.44963113 | 12.22212636 |
| ENSMUSG00000024962  | 0.134386618  | 5.111071716  | 0.233210446 | 0.629153482 | 0.999071534 | Vegfb         | Vegfb         | VEGFB      | 25.68589228 | 31.36443349 | 32.85226753 | 38.57645124 | 41.46522405 | 26.99476192 | 25.10953387 | 54.57513739 | 34.02022766 | 29.15009817 |
| ENSMUSG00000081111  | 0.787731245  | -0.921335954 | 0.233098979 | 0.629235442 | 0.999071534 | Gm5913        | Gm5913        |            | 0           | 0.237160178 | 0           | 0           | 1.24264867  | 1.309718907 | 1.29430587  | 0           | 0           | 0           |
| ENSMUSG00000021577  | -0.122331624 | 6.980754784  | 0.233086274 | 0.629244786 | 0.999071534 | Sdha          | Sdha          | SDHA       | 152.8521131 | 137.0785827 | 110.607122  | 141.8170258 | 140.3538972 | 180.8867335 | 161.9823796 | 89.73810566 | 63.32633601 | 107.0579839 |
| ENSMUSG00000022744  | 0.149092236  | 5.216154418  | 0.232884811 | 0.629392986 | 0.999071534 | Cldn25        | Cldnd1        | CLDND1     | 40.56405939 | 61.18732583 | 24.1679591  | 22.61856673 | 35.12117558 | 43.65729691 | 65.88016876 | 34.61030865 | 19.2493205  | 28.43114956 |
| ENSMUSG00000039671  | 0.138232296  | 5.262688305  | 0.232581614 | 0.629616173 | 0.999071534 | Zmynd8        | Zmynd8        | ZMYND8     | 29.12471392 | 41.44374104 | 42.74833992 | 24.97755836 | 51.79882878 | 41.47443207 | 18.24971276 | 52.22633401 | 33.15597245 | 47.38524927 |
| ENSMUSG00000013878  | 0.118836651  | 4.513496365  | 0.232549552 | 0.629639784 | 0.999071534 | Rnf170        | Rnf170        | RNF170     | 22.8085109  | 21.87802639 | 23.02351536 | 25.32446889 | 19.62076848 | 26.55818896 | 24.8506727  | 16.85611838 | 23.72773384 | 21.50309932 |
| ENSMUSG00000034968  | -0.436988397 | -0.158611009 | 0.232532155 | 0.629652597 | 0.999071534 | Lbx2          | Lbx2          | LBX2       | 1.543960738 | 0.177870133 | 0           | 1.80393477  | 0.981038424 | 1.164194584 | 0.841298815 | 0.27632981  | 0.31427462  | 0.653589645 |
| ENSMUSG00000021134  | 0.114835931  | 7.602258409  | 0.232289995 | 0.629831006 | 0.999071534 | Srsf5         | Srsf5         | SRSF5      | 218.4704444 | 188.245891  | 215.9632669 | 158.9544061 | 188.5555851 | 244.1898141 | 171.4955277 | 200.200947  | 160.3586251 | 204.1814051 |
| ENSMUSG00000061613  | 0.119821261  | 6.445222281  | 0.232278793 | 0.629839262 | 0.999071534 | U2af1         | U2af1         | U2AF1L5    | 66.03941156 | 68.12426102 | 133.3613565 | 85.27060895 | 78.81008672 | 127.1154962 | 99.79098255 | 69.28969975 | 58.45507939 | 92.94044753 |
| ENSMUSG00000046062  | 0.104331583  | 6.7548255    | 0.232244101 | 0.629864831 | 0.999071534 | Ppp1r15b      | Ppp1r15b      | PPP1R15B   | 95.58520568 | 109.449422  | 111.7515658 | 96.85742074 | 126.8155669 | 141.3768798 | 119.9174388 | 111.9135729 | 83.67561768 | 88.43067898 |
| ENSMUSG00000028603  | -0.104936184 | 6.691899547  | 0.232233698 | 0.629872499 | 0.999071534 | Scp2          | Scp2          | SCP2       | 96.84844629 | 116.5049373 | 107.9816334 | 118.8515485 | 114.2582751 | 99.90244777 | 88.40109089 | 109.7029344 | 77.8615372  | 103.3978818 |
| ENSMUSG00000094290  | 0.722151962  | -0.509004649 | 0.232215585 | 0.62988585  | 0.999071534 | Gm23611       | Gm27512       |            | 0.491260235 | 0           | 1.817645949 | 0           | 0           | 0           | 0.323576467 | 0           | 1.571373102 | 1.30717929  |
| ENSMUSG00000087165  | -0.241314135 | 2.059828158  | 0.232173891 | 0.629916585 | 0.999071534 | 2010001A14Rik | 2010001A14Rik |            | 5.123142449 | 2.253021687 | 2.288887492 | 8.880909638 | 3.858751134 | 3.128772945 | 3.17104938  | 2.279720929 | 4.792687961 | 3.986896835 |
| ENSMUSG00000094796  | -0.451680237 | -0.279924395 | 0.232171251 | 0.629918532 | 0.999071534 | BC147527      | BC147527      |            | 0.912340436 | 1.185800888 | 0.336601102 | 0.555056852 | 1.111843547 | 1.45524323  | 0.776583522 | 0           | 0           | 0.784307574 |
| ENSMUSG00000071267  | 0.172994603  | 3.585117301  | 0.232145706 | 0.629937364 | 0.999071534 | Zfp942        | Zfp942        |            | 15.79050755 | 9.427117061 | 9.626791509 | 8.603381212 | 14.84638148 | 12.80614043 | 19.54401863 | 14.3691501  | 4.085570065 | 11.24174189 |
| ENSMUSG00000055214  | 0.367398314  | -0.191129396 | 0.232145343 | 0.629937632 | 0.999071534 | Pld5          | Pld5          | PLD5       | 1.052700503 | 0.237160178 | 0.471241542 | 0.416292639 | 1.24264867  | 0.873145938 | 0.841298815 | 0.207247357 | 1.099961171 | 0.980384468 |
| ENSMUSG00000019578  | -0.111561648 | 6.316082831  | 0.231839643 | 0.630163103 | 0.999071534 | Ubxn6         | Ubxn6         | UBXN6      | 110.7440929 | 107.0778202 | 60.79015897 | 78.26301619 | 72.92385618 | 72.83492368 | 86.78320856 | 65.49016487 | 61.83353156 | 80.97975702 |
| ENSMUSG00000087626  | 0.225895284  | 2.689966711  | 0.231738434 | 0.630237791 | 0.999071534 | Gm15050       | Gm15050       |            | 5.263502516 | 4.446753331 | 8.145746661 | 8.811527532 | 3.27012808  | 3.929156722 | 2.588611739 | 9.80970824  | 6.521198373 | 9.084896066 |
| ENSMUSG00000003527  | -0.135047031 | 4.253271853  | 0.23156706  | 0.630364304 | 0.999071534 | Dgcr14        | Dgcr14        | DGCR14     | 22.10671057 | 23.77530781 | 19.72482456 | 14.77838869 | 23.02170168 | 25.75780518 | 19.93231039 | 21.96821986 | 11.23531768 | 10.1306395  |
| ENSMUSG00000028675  | 0.106515477  | 6.143058589  | 0.231528715 | 0.630392619 | 0.999071534 | Pnrc2         | Pnrc2         | PNRC2      | 61.89878958 | 59.58649463 | 68.86858541 | 82.84223522 | 78.28686623 | 65.41318321 | 86.26548621 | 64.24668073 | 62.38351215 | 71.96021992 |
| ENSMUSG00000057396  | -0.391109804 | 0.212596548  | 0.23125426  | 0.630595369 | 0.999071534 | Zfp759        | Zfp759        |            | 0.771980369 | 0.652190488 | 0.336601102 | 1.80393477  | 2.419894779 | 1.164194584 | 1.423736457 | 1.312566595 | 0           | 0.522871716 |
| ENSMUSG00000026536  | 0.276237906  | 1.495901623  | 0.230963889 | 0.630810039 | 0.999071534 | Mnda          | Mnda          | MNDA       | 4.070441945 | 2.312311732 | 3.366011017 | 2.01208109  | 0.915635862 | 2.473913492 | 3.300479967 | 2.625133191 | 4.556981996 | 0.71894861  |
| ENSMUSG00000034771  | 0.174087765  | 4.969101241  | 0.230911315 | 0.630848924 | 0.999071534 | Tle2          | Tle2          | TLE2       | 20.21184966 | 25.79116932 | 31.57318334 | 37.60510175 | 36.23301912 | 17.60844309 | 11.58403753 | 50.3611078  | 32.21314859 | 42.41796796 |
| ENSMUSG00000024797  | -0.115123379 | 5.129962972  | 0.230831611 | 0.630907886 | 0.999071534 | Vps51         | Vps51         | VPS51      | 47.23116257 | 33.49887509 | 35.47775612 | 28.30789947 | 44.80075469 | 44.74872934 | 24.7859574  | 35.78471034 | 18.93504588 | 40.91471178 |
| ENSMUSG00000028397  | -0.145906623 | 3.732685666  | 0.230646477 | 0.631044889 | 0.999071534 | Kdm4c         | Kdm4c         | ALS13412.1 | 13.40438641 | 19.80287483 | 12.65620142 | 9.019673851 | 17.33167882 | 13.82481069 | 15.8552469  | 13.74740803 | 8.092571475 | 9.346331924 |
| ENSMUSG00000036986  | -0.139946056 | 4.00485127   | 0.230524599 | 0.631135119 | 0.999071534 | Pml           | Pml           | PML        | 18.10644865 | 17.37198301 | 18.24377971 | 12.90507182 | 20.40559922 | 25.68504302 | 10.22501637 | 17.75419027 | 8.563983406 | 13.39858772 |
| ENSMUSG00000093385  | 0.361439648  | 0.924244428  | 0.230312441 | 0.631292255 | 0.999071534 | A330044P14Rik | A330044P14Rik |            | 1.543960738 | 0.889350666 | 2.356207712 | 0.693821065 | 2.616102464 | 0.436572969 | 0.129430587 | 2.141556024 | 1.492804447 | 5.097999231 |
| ENSMUSG00000027879  | -0.101533153 | 6.517978404  | 0.230303409 | 0.631298946 | 0.999071534 | Sec22b        | Sec22b        | SEC22B     | 107.1649112 | 106.3663397 | 88.25680887 | 96.71865653 | 93.3294554  | 99.4658748  | 107.4273872 | 73.22739954 | 69.53325976 | 78.6268343  |

|                    |              |              |             |             |             |          |          |         |             |             |             |             |             |             |             |             |             |             |
|--------------------|--------------|--------------|-------------|-------------|-------------|----------|----------|---------|-------------|-------------|-------------|-------------|-------------|-------------|-------------|-------------|-------------|-------------|
| ENSMUSG00000024217 | 0.127321729  | 6.237320139  | 0.230275368 | 0.631319723 | 0.999071534 | Snrpc    | Snrpc    | SNRPC   | 89.7602629  | 67.76852076 | 70.95551224 | 66.81496861 | 79.26790465 | 88.18773976 | 136.4198387 | 53.46981815 | 39.83430813 | 69.73801513 |
| ENSMUSG00000063296 | -0.112011904 | 5.288361673  | 0.230182307 | 0.631388683 | 0.999071534 | Tmem117  | Tmem117  | TMEM117 | 44.49414127 | 31.83875385 | 33.25618885 | 53.0079294  | 46.69742898 | 38.85499425 | 48.01874776 | 32.95232979 | 25.61338156 | 36.40494323 |
| ENSMUSG00000020849 | -0.121615608 | 9.569762421  | 0.230153028 | 0.631410383 | 0.999071534 | Ywhae    | Ywhae    | YWHAE   | 932.5522857 | 801.0084999 | 833.4243278 | 737.9480853 | 811.5803868 | 967.5912239 | 870.4854126 | 605.0932005 | 449.4127072 | 696.9879975 |
| ENSMUSG00000037111 | -0.110349193 | 6.060491754  | 0.230142642 | 0.631418082 | 0.999071534 | Setd7    | Setd7    | SETD7   | 59.44248841 | 75.17977631 | 75.66792766 | 71.39418764 | 76.978815   | 92.04413433 | 38.11730786 | 57.89109511 | 57.27654957 | 66.92757965 |
| ENSMUSG00000024431 | 0.137408619  | 6.311566647  | 0.229964224 | 0.631550357 | 0.999071534 | Nr3c1    | Nr3c1    | NR3C1   | 48.91548338 | 76.83989755 | 95.12347134 | 89.64168166 | 79.66032002 | 73.27149665 | 47.630456   | 97.06084561 | 102.1392516 | 68.36547687 |
| ENSMUSG00000015957 | 0.280328755  | 0.829360369  | 0.229951864 | 0.631559523 | 0.999071534 | Wnt11    | Wnt11    | WNT11   | 1.614140771 | 2.134441599 | 1.95228639  | 0.555056852 | 1.504258917 | 0.9459081   | 1.553167044 | 3.17779281  | 1.178529826 | 1.699333077 |
| ENSMUSG00000061393 | 0.440854158  | 0.296483424  | 0.229927658 | 0.631577474 | 0.999071534 | Acvr2b   | Acvr2b   | ACVR2B  | 0.070180034 | 1.48225111  | 2.760129034 | 0           | 0.523220493 | 0.582097292 | 0.647152935 | 1.657978857 | 0.864255206 | 2.222204793 |
| ENSMUSG00000003779 | 0.223155788  | 5.410177552  | 0.229884465 | 0.63160951  | 0.999071534 | Klf20a   | Klf20a   | KLF20A  | 65.82887146 | 28.10348105 | 38.64180648 | 24.76941204 | 47.41685716 | 112.635826  | 78.56436628 | 10.29328541 | 22.15636074 | 13.92145944 |
| ENSMUSG00000093507 | 0.499218987  | -0.184549554 | 0.229852409 | 0.631633287 | 0.999071534 | Gm20627  | Gm20627  |         | 0.140360067 | 0.118580089 | 1.481044848 | 1.040731598 | 0.457817931 | 0           | 0.064715293 | 1.312566595 | 1.649941757 | 0.915025503 |
| ENSMUSG00000047539 | 0.101467709  | 5.2225293    | 0.229810858 | 0.63166411  | 0.999071534 | Fbxo28   | Fbxo28   | FBXO28  | 33.40569597 | 43.04457224 | 33.99671127 | 32.19329744 | 44.14672908 | 45.62187527 | 37.34072434 | 42.20937841 | 27.49902928 | 34.83632808 |
| ENSMUSG00000020653 | -0.189799806 | 2.90457122   | 0.229699977 | 0.63174638  | 0.999071534 | Klf11    | Klf11    | KLF11   | 6.386383052 | 13.04380977 | 8.145746661 | 7.007592761 | 6.082438228 | 7.276216152 | 3.365195261 | 9.671543335 | 4.792687961 | 8.104511599 |
| ENSMUSG00000002274 | -0.151690428 | 4.652714983  | 0.2296855   | 0.631757123 | 0.999071534 | Metrn    | Metrn    | METRN   | 40.14297919 | 20.04003501 | 24.90848153 | 24.56126572 | 27.46907587 | 43.65729691 | 32.29293145 | 11.39860464 | 10.99961171 | 21.96061207 |
| ENSMUSG00000058625 | -0.698831119 | 4.03616202   | 0.229594741 | 0.631824485 | 0.999071534 | Gm17383  | Gm17383  |         | 91.30422364 | 13.04380977 | 0           | 1.387642131 | 1.177246109 | 44.53044285 | 24.07408917 | 0           | 0           | 0.130717929 |
| ENSMUSG00000017715 | -0.104171782 | 6.142014075  | 0.22959081  | 0.631827403 | 0.999071534 | Pgs1     | Pgs1     | PGS1    | 83.79496005 | 78.38143871 | 67.65682144 | 65.28856226 | 85.1541352  | 100.7755937 | 74.29315691 | 49.80848818 | 41.40568124 | 70.97983545 |
| ENSMUSG00000064387 | -0.299057817 | 0.501058518  | 0.229331461 | 0.632019984 | 0.999071534 | Snora73a | Snora73a |         | 1.333420637 | 0.830060622 | 1.481044848 | 2.636520049 | 0.981038424 | 0.654859454 | 0.711868228 | 1.312566595 | 1.099961171 | 1.633974113 |
| ENSMUSG00000030697 | -0.103969296 | 6.757212521  | 0.229309163 | 0.632036548 | 0.999071534 | Ppp4c    | Ppp4c    | PPP4C   | 134.1842241 | 103.9354478 | 122.9940426 | 101.7141682 | 119.3596749 | 134.3917123 | 107.4921025 | 87.11297247 | 67.80474935 | 114.9664186 |
| ENSMUSG00000036632 | 0.112924326  | 6.083809211  | 0.229282596 | 0.632056284 | 0.999071534 | Alg5     | Alg5     | ALG5    | 71.86435435 | 63.79608778 | 62.54004847 | 66.7455865  | 72.85845362 | 64.03070214 | 108.9805542 | 54.7133023  | 52.79813623 | 58.82306805 |
| ENSMUSG00000068040 | -0.134931166 | 5.236161972  | 0.229265069 | 0.632069305 | 0.999071534 | Tm9sf4   | Tm9sf4   | TM9SF4  | 46.73990234 | 59.4086245  | 35.20847524 | 21.02277828 | 43.49270346 | 56.5361995  | 45.55956661 | 32.53783508 | 17.75651605 | 26.79717545 |
| ENSMUSG00000041439 | -0.280432696 | 1.482436069  | 0.22878832  | 0.63242373  | 0.999071534 | Mfsd6    | Mfsd6    | MFSD6   | 3.438821644 | 4.802493597 | 3.702612119 | 1.526406344 | 1.700466601 | 5.893735083 | 2.9769035   | 1.588896405 | 0.31427462  | 1.764692042 |
| ENSMUSG00000036898 | 0.170906984  | 3.259691724  | 0.228656052 | 0.632522141 | 0.999071534 | Zfp157   | Zfp157   |         | 7.368903522 | 8.419186306 | 8.616988204 | 11.86434022 | 9.614176555 | 6.184783729 | 7.571689337 | 12.22759407 | 8.17114013  | 13.20251083 |
| ENSMUSG00000082082 | 0.241333822  | 1.857496459  | 0.228342132 | 0.632755847 | 0.999071534 | Gm13230  | Gm13230  |         | 5.193322482 | 2.905212176 | 2.760129034 | 1.179495811 | 4.774386997 | 5.893735083 | 5.953807    | 3.315957715 | 1.885647722 | 1.830051006 |
| ENSMUSG00000000876 | -0.145236644 | 3.584566487  | 0.22829691  | 0.632789529 | 0.999071534 | Pxmp4    | Pxmp4    | PXMP4   | 12.84294614 | 9.427117061 | 10.97319592 | 16.09664872 | 15.10799173 | 10.69603774 | 10.28973166 | 12.08942917 | 10.29249382 | 10.45743432 |
| ENSMUSG00000049164 | 0.18752555   | 2.541655913  | 0.228260986 | 0.63281629  | 0.999071534 | Zfp518a  | Zfp518a  | ZNF518A | 5.965302851 | 6.284744707 | 4.981696305 | 3.677251647 | 6.867268968 | 8.658697221 | 4.335924663 | 4.075864691 | 7.385453579 | 4.705845444 |
| ENSMUSG00000014873 | 0.133533484  | 3.768981681  | 0.228226818 | 0.632841744 | 0.999071534 | Surf2    | Surf2    | SURF2   | 11.64988557 | 15.23754141 | 14.27188671 | 12.76630761 | 12.88430463 | 17.09910796 | 17.53784453 | 14.23098519 | 9.349669957 | 10.84958811 |
| ENSMUSG00000042772 | 0.118700015  | 5.319715861  | 0.228215674 | 0.632850047 | 0.999071534 | Smg7     | Smg7     | SMG7    | 35.65145704 | 43.40031251 | 47.52807556 | 25.87952574 | 46.63202642 | 56.97277247 | 23.29750565 | 45.66350103 | 35.67016941 | 39.99968628 |
| ENSMUSG00000090862 | 0.155177102  | 9.002571034  | 0.228104903 | 0.632932589 | 0.999071534 | Rps13    | Rps13    | RPS13   | 534.2805954 | 302.7942568 | 550.4774417 | 744.955678  | 361.4145554 | 365.775386  | 530.6654065 | 426.4459786 | 601.1287802 | 606.4004727 |
| ENSMUSG00000026705 | -0.126571046 | 4.223767482  | 0.227963917 | 0.63303768  | 0.999071534 | Klh20    | Klh20    | KLHL20  | 17.12392818 | 20.33648523 | 19.72482456 | 15.8885024  | 27.86149124 | 26.77647544 | 16.56711513 | 18.92859196 | 10.76390575 | 14.83648494 |
| ENSMUSG00000001510 | 0.1580629    | 3.640607841  | 0.22795309  | 0.633045753 | 0.999071534 | Dlx3     | Dlx3     | DLX3    | 10.456825   | 11.32439848 | 13.32940363 | 8.533999106 | 17.2008737  | 11.42365936 | 8.024696391 | 19.13583931 | 9.113963991 | 14.77112598 |
| ENSMUSG00000005687 | 0.112156305  | 6.675000936  | 0.227692583 | 0.633240047 | 0.999071534 | Bcas2    | Bcas2    | BCAS2   | 127.3767609 | 78.20356857 | 108.452875  | 110.8726063 | 83.12665579 | 107.8335234 | 136.0962622 | 94.29754752 | 79.98289089 | 94.57442164 |
| ENSMUSG00000059554 | -0.174391906 | 2.913440678  | 0.22754869  | 0.633347425 | 0.999071534 | Ccdc28a  | Ccdc28a  | CCDC28A | 8.281243958 | 7.885575906 | 8.078426441 | 7.978942253 | 8.502333007 | 3.929156722 | 8.671849326 | 8.220811835 | 5.499805857 | 6.601255415 |
| ENSMUSG00000030884 | 0.129682092  | 6.878423154  | 0.227480383 | 0.633398413 | 0.999071534 | Uqcr2    | Uqcr2    | UQCRC2  | 128.1487412 | 127.4143054 | 89.13917173 | 101.2978756 | 138.7188331 | 111.1078206 | 208.6421062 | 111.2918308 | 69.37612245 | 97.25413918 |
| ENSMUSG00000040506 | 0.131287818  | 4.243354572  | 0.227390552 | 0.633465482 | 0.999071534 | Ambra1   | Ambra1   | AMBRA1  | 19.86094949 | 23.06382727 | 17.43593707 | 12.48877918 | 20.86341715 | 24.52084843 | 12.16647517 | 22.24454967 | 13.43524002 | 23.65994515 |
| ENSMUSG00000066191 | -0.494641589 | -0.790874256 | 0.227260152 | 0.633562869 | 0.999071534 | Anks6    | Anks6    | ANKS6   | 0.491260235 | 0.237160178 | 0.336601102 | 1.110113705 | 0.457817931 | 1.018670261 | 0.711868228 | 0           | 0           | 0.196076894 |
| ENSMUSG00000049755 | 0.144246091  | 3.629909397  | 0.227252451 | 0.633568621 | 0.999071534 | Zfp672   | Zfp672   | ZNF672  | 9.825204696 | 11.38368853 | 9.76143195  | 16.37417715 | 12.68809695 | 11.93299449 | 10.74273872 | 13.19474841 | 11.15674902 | 14.50969012 |
| ENSMUSG00000035199 | 0.116817439  | 7.362609939  | 0.227062487 | 0.633710557 | 0.999071534 | Arl6ip5  | Arl6ip5  | ARL6IP5 | 181.2750266 | 158.7194489 | 146.4887995 | 175.8836401 | 155.6580966 | 168.6626904 | 217.8963931 | 156.1954249 | 142.366403  | 137.9727741 |
| ENSMUSG00000028125 | -0.298020319 | 0.258032182  | 0.226944945 | 0.633798417 | 0.999071534 | Abca4    | Abca4    | ABCA4   | 1.122880537 | 1.185800888 | 1.95228639  | 0.971349492 | 0.850233301 | 1.018670261 | 0.841298815 | 0.621742072 | 1.257098482 | 0.784307574 |
| ENSMUSG00000029587 | 0.129715167  | 3.796380861  | 0.226889005 | 0.633840241 | 0.999071534 | Zfp12    | Zfp12    | ZNF12   | 13.61492651 | 16.30476221 | 13.73332495 | 9.574730704 | 15.30419941 | 18.04501606 | 13.52549634 | 13.54016067 | 11.15674902 | 13.79074151 |
| ENSMUSG00000029394 | -0.112197118 | 7.408075634  | 0.22675786  | 0.633938317 | 0.999071534 | Cdk2ap1  | Cdk2ap1  | CDK2AP1 | 202.7501169 | 156.229267  | 190.2469427 | 167.4884052 | 199.8048257 | 210.4281711 | 179.5849394 | 137.888575  | 110.938941  | 161.5673603 |
| ENSMUSG00000097703 | 0.314809527  | 0.400487192  | 0.226583683 | 0.634068629 | 0.999071534 | Gm26623  | Gm26623  |         | 2.17558104  | 0.474320355 | 1.009803305 | 1.318260024 | 0.523220493 | 2.037340523 | 1.747312924 | 0.552659619 | 1.335667137 | 0.784307574 |

|                     |              |              |             |             |             |               |               |          |             |             |             |             |             |             |              |             |             |             |
|---------------------|--------------|--------------|-------------|-------------|-------------|---------------|---------------|----------|-------------|-------------|-------------|-------------|-------------|-------------|--------------|-------------|-------------|-------------|
| ENSMUSG00000001786  | -0.114670073 | 4.445660209  | 0.226403811 | 0.634203265 | 0.999071534 | Fbxo7         | Fbxo7         | FBXO7    | 26.17715251 | 25.4947191  | 18.58038081 | 20.67586775 | 26.29182976 | 21.24655116 | 23.29750565  | 22.93537419 | 14.53520119 | 18.69266385 |
| ENSMUSG000000021033 | -0.147526077 | 4.065384101  | 0.226364969 | 0.634232348 | 0.999071534 | Gstz1         | Gstz1         | GSTZ1    | 20.63292986 | 17.60914319 | 13.46404407 | 24.00620887 | 14.45396611 | 17.31739444 | 25.36839504  | 13.67832557 | 7.621159544 | 13.52930565 |
| ENSMUSG000000005371 | 0.105702371  | 6.126317459  | 0.226330162 | 0.634258411 | 0.999071534 | Fbxo11        | Fbxo11        | FBXO11   | 54.88078623 | 81.82026128 | 67.1855799  | 64.5947412  | 80.44515076 | 73.78083178 | 58.69677119  | 85.86948833 | 64.26915987 | 63.59427246 |
| ENSMUSG000000054766 | 0.126380622  | 8.216460687  | 0.226284493 | 0.634292612 | 0.999071534 | Set           | Set           | SET      | 300.4407236 | 236.6265672 | 332.7638491 | 276.3489304 | 330.4791437 | 444.2857583 | 354.8986694  | 205.5893783 | 236.4130832 | 285.5533159 |
| ENSMUSG000000020923 | -0.112444964 | 7.069021879  | 0.226140336 | 0.634400598 | 0.999071534 | Ubtf          | Ubtf          |          | 148.2904109 | 112.2360541 | 152.4802991 | 139.5967984 | 171.2893088 | 177.9762471 | 116.6169588  | 94.85020714 | 101.824977  | 140.1949789 |
| ENSMUSG000000027177 | -0.097746616 | 5.81437797   | 0.226094424 | 0.634434999 | 0.999071534 | Hipk3         | Hipk3         | HIPK3    | 58.31960787 | 71.08876324 | 51.09604724 | 52.59163676 | 68.99970248 | 71.37968045 | 57.98490296  | 55.54229172 | 35.98444403 | 45.35912137 |
| ENSMUSG000000022957 | -0.135704534 | 4.928148298  | 0.226083932 | 0.634442861 | 0.999071534 | Itsn1         | Itsn1         | ITSN1    | 34.38821644 | 39.42787953 | 27.60129034 | 26.64272891 | 37.34486267 | 60.3198319  | 29.31602795  | 25.76775474 | 15.94943698 | 15.49007459 |
| ENSMUSG000000046572 | 0.174012803  | 3.338823514  | 0.225519238 | 0.634866336 | 0.999071534 | Zfp518b       | Zfp518b       | ZNF518B  | 12.07096577 | 7.944865951 | 9.626791509 | 10.68484441 | 8.306125323 | 21.97417278 | 10.80745401  | 4.421276953 | 6.756904338 | 9.738485711 |
| ENSMUSG000000072692 | 0.129508386  | 9.011840126  | 0.225221195 | 0.635090106 | 0.999071534 | Gm13826       | Rpl37rt       |          | 508.524523  | 472.1859137 | 528.4637297 | 561.7175346 | 481.4936585 | 366.5757697 | 548.3973969  | 526.062875  | 520.2816341 | 581.1719124 |
| ENSMUSG000000090399 | 0.418065353  | -0.444819504 | 0.225208085 | 0.635099953 | 0.999071534 | Nav1          | Gm38399       |          | 0.771980369 | 0.296450222 | 0           | 1.179495811 | 0.39241537  | 1.018670261 | 0.776583522  | 0.898071881 | 0.392843275 | 0.326794823 |
| ENSMUSG000000021226 | 0.213161984  | 2.123320088  | 0.22512764  | 0.635160385 | 0.999071534 | Acot2         | Acot2         | ACOT1    | 3.509001677 | 3.972432975 | 3.971893    | 5.342422204 | 3.400933203 | 3.710870238 | 2.394465859  | 6.493750525 | 5.499805857 | 3.137230296 |
| ENSMUSG000000032606 | -0.123092983 | 4.170694128  | 0.225096262 | 0.635183959 | 0.999071534 | Nicn1         | Nicn1         | NICN1    | 16.00104765 | 23.00453723 | 15.95489222 | 19.14946141 | 22.62928631 | 17.09910796 | 14.17264927  | 17.61602536 | 15.71373102 | 17.32012559 |
| ENSMUSG000000062593 | 0.103141386  | 5.803543013  | 0.225022027 | 0.635239742 | 0.999071534 | Lilrb4        | Lilrb4a       |          | 64.56563086 | 65.21904885 | 62.27120382 | 47.6655072  | 39.43774464 | 65.48594537 | 48.53647011  | 63.07227904 | 41.71995586 | 61.43742663 |
| ENSMUSG000000083736 | 0.594675398  | -0.464567781 | 0.224763678 | 0.635433962 | 0.999071534 | Gm6039        | Gm6039        |          | 0.421080201 | 0.711480533 | 0           | 0           | 1.308051232 | 0.509335131 | 2.718042326  | 0.069082452 | 0           | 0.196076894 |
| ENSMUSG000000041278 | 0.099894752  | 5.290361195  | 0.224762563 | 0.6354348   | 0.999071534 | Ttc1          | Ttc1          | TTC1     | 38.52883841 | 39.72432975 | 38.57448626 | 35.66240277 | 43.23109321 | 42.49310233 | 51.77223478  | 37.30452429 | 29.38467701 | 34.70561015 |
| ENSMUSG000000036944 | -0.209173016 | 2.138550647  | 0.224739158 | 0.635452402 | 0.999071534 | Tmem71        | Tmem71        | TMEM71   | 3.719541778 | 6.581194929 | 5.183656966 | 4.02416218  | 4.251166504 | 3.34705943  | 2.588611739  | 4.835771668 | 1.885647722 | 6.53589645  |
| ENSMUSG000000063172 | 0.143631158  | 4.366306177  | 0.224688849 | 0.635490242 | 0.999071534 | Hspb11        | Hspb11        | HSPB11   | 14.80798708 | 21.2258359  | 18.91698192 | 26.01828996 | 19.48996336 | 11.56918368 | 24.26823505  | 21.96821986 | 23.33489056 | 19.1501766  |
| ENSMUSG000000026463 | -0.146084064 | 4.5242486    | 0.22435652  | 0.635740331 | 0.999071534 | Atp2b4        | Atp2b4        | ATP2B4   | 16.84320805 | 30.00076247 | 33.32350907 | 26.98963945 | 16.93926345 | 26.77647544 | 11.77818341  | 16.78703593 | 24.98483232 | 23.46386826 |
| ENSMUSG000000042367 | 0.131049446  | 5.138113653  | 0.224316014 | 0.635770828 | 0.999071534 | Gjb3          | Gjb3          | GJB3     | 43.37126073 | 26.32477972 | 52.44245165 | 23.86744465 | 28.38471173 | 54.35333466 | 48.21289364  | 22.65904439 | 26.2419308  | 29.80368781 |
| ENSMUSG000000044501 | 0.173841082  | 2.964368055  | 0.224264326 | 0.63580975  | 0.999071534 | Zfp758        | Zfp758        |          | 8.211063924 | 9.189956883 | 5.85685917  | 4.926129565 | 9.483371431 | 6.184783729 | 9.901439902  | 8.980718811 | 7.778296855 | 5.686229912 |
| ENSMUSG000000054302 | 0.109959151  | 5.444141338  | 0.22420335  | 0.635855672 | 0.999071534 | Eapp          | Eapp          | EAPP     | 39.65171895 | 38.65710895 | 42.6810197  | 53.42422204 | 41.26901637 | 34.34374024 | 52.28995713  | 46.56157291 | 38.10579772 | 43.20227554 |
| ENSMUSG000000087574 | -0.295029062 | 0.793184393  | 0.224027209 | 0.635988372 | 0.999071534 | C030037D09Rik | C030037D09Rik |          | 2.596661241 | 2.371601776 | 1.683005509 | 0.555056852 | 2.027479409 | 1.746291877 | 0.841298815  | 2.901463001 | 0.942823861 | 0.522871716 |
| ENSMUSG000000003378 | 0.332589393  | 0.755719212  | 0.223935322 | 0.636057622 | 0.999071534 | Grik5         | Grik5         | GRIK5    | 1.403600671 | 0.711480533 | 0.807842644 | 3.191576901 | 0.981038424 | 1.964578361 | 0.388291761  | 1.4507315   | 3.457020824 | 0.784307574 |
| ENSMUSG000000021192 | 0.12648918   | 4.398117647  | 0.223914572 | 0.636073263 | 0.999071534 | Golga5        | Golga5        | GOLGA5   | 18.73806896 | 29.52644211 | 18.17645949 | 16.02726661 | 21.90985813 | 30.41458352 | 26.08026327  | 13.81649048 | 13.98522061 | 23.79066308 |
| ENSMUSG000000026102 | 0.131469943  | 4.596172848  | 0.223901684 | 0.636082978 | 0.999071534 | Inpp1         | Inpp1         | INPP1    | 17.61518842 | 19.26926443 | 26.65880726 | 26.15705417 | 29.16954247 | 17.82672957 | 20.51474803  | 31.57068074 | 22.70634132 | 26.27430373 |
| ENSMUSG000000087351 | -0.424213479 | 0.025034194  | 0.223688423 | 0.636243782 | 0.999071534 | Gm11464       | Gm11464       |          | 0.771980369 | 0.355740266 | 1.95228639  | 1.80393477  | 0.327012808 | 0.291048646 | 0            | 1.105319238 | 0.864255206 | 1.241820326 |
| ENSMUSG000000092187 | -0.457480259 | -0.659572401 | 0.223679253 | 0.636250699 | 0.999071534 | Gm20457       | Gm20457       |          | 0.210540101 | 0.474320355 | 1.009803305 | 1.110113705 | 0.130805123 | 0.218286485 | 0.258861174  | 0.828989429 | 0           | 0.71894861  |
| ENSMUSG000000038421 | -0.220834197 | 2.068087708  | 0.223653437 | 0.636270172 | 0.999071534 | Fcrla         | Fcrla         | FCRLA    | 7.228543455 | 4.150303108 | 3.500651458 | 3.954780073 | 3.924153696 | 2.619437815 | 2.329750565  | 2.832380548 | 2.749902928 | 7.385562989 |
| ENSMUSG000000069171 | 0.259472648  | 2.515796006  | 0.223597044 | 0.636312714 | 0.999071534 | Nr2f1         | Nr2f1         | NR2F1    | 2.877381375 | 1.007930755 | 9.626791509 | 8.256470679 | 4.316569065 | 5.602686437 | 3.106334087  | 4.075864691 | 9.506807267 | 5.94766577  |
| ENSMUSG000000038807 | -0.129828349 | 4.884851637  | 0.223484857 | 0.636397365 | 0.999071534 | Rap1gap2      | Rap1gap2      | RAP1GAP2 | 38.45865838 | 41.97735144 | 31.90978444 | 22.61856673 | 25.24538878 | 50.8607509  | 22.65035272  | 15.68171669 | 21.05639957 | 29.99976471 |
| ENSMUSG000000028078 | -0.247462568 | 1.130208227  | 0.223478904 | 0.636401857 | 0.999071534 | Dclk2         | Dclk2         | DCLK2    | 4.000261912 | 2.668051998 | 1.817645949 | 1.040731598 | 2.158284533 | 3.056010784 | 2.006174098  | 1.312566595 | 1.571373102 | 1.30717929  |
| ENSMUSG000000046623 | -0.155276507 | 3.443733061  | 0.223475178 | 0.63640467  | 0.999071534 | Gjb4          | Gjb4          | GJB4     | 13.12366627 | 13.99245048 | 11.64639812 | 10.19916966 | 9.875786801 | 9.822891806 | 10.095585878 | 5.664761096 | 11.62816095 | 11.045665   |
| ENSMUSG000000047554 | 0.10626322   | 5.492040878  | 0.223446663 | 0.63642619  | 0.999071534 | Tmem41b       | Tmem41b       | TMEM41B  | 37.26559781 | 45.23830388 | 37.49736273 | 51.06523042 | 52.84526977 | 43.14796178 | 57.14360414  | 40.13690484 | 33.47024707 | 50.78391542 |
| ENSMUSG000000058301 | 0.116260752  | 5.943132437  | 0.223327033 | 0.636516495 | 0.999071534 | Upf1          | Upf1          | UPF1     | 56.14402683 | 48.26209615 | 70.1476696  | 62.72142432 | 68.21487174 | 91.17098839 | 34.42853613  | 57.47660039 | 49.73395868 | 80.19544945 |
| ENSMUSG000000038168 | -0.175146691 | 3.005748195  | 0.223168634 | 0.636636112 | 0.999071534 | Leprel1       | P3h2          | P3H2     | 5.403862583 | 7.766995817 | 7.539864678 | 12.21125075 | 10.26820217 | 9.750129644 | 8.542418739  | 5.250266382 | 3.928432755 | 9.215613995 |
| ENSMUSG000000005470 | 0.164977609  | 4.55173019   | 0.223134603 | 0.636661818 | 0.999071534 | Asf1b         | Asf1b         | ASF1B    | 27.93165335 | 10.90936817 | 20.46534698 | 29.00172054 | 25.44159646 | 43.43901043 | 34.04024437  | 9.671543335 | 18.62077126 | 17.32012559 |
| ENSMUSG000000034311 | 0.134315824  | 5.233230598  | 0.22312894  | 0.636666095 | 0.999071534 | Klf4          | Klf4          | KLF4B    | 48.91548338 | 31.06798327 | 35.88167744 | 26.64272891 | 44.14672908 | 75.01778853 | 48.34232423  | 25.90591965 | 17.28510412 | 33.07163604 |
| ENSMUSG000000026036 | 0.122152822  | 4.557619937  | 0.223118813 | 0.636673745 | 0.999071534 | Nif3l1        | Nif3l1        | NIF3L1   | 26.87895285 | 21.70015625 | 20.26338632 | 22.34103831 | 25.3761939  | 29.75972406 | 30.61033382  | 13.74740803 | 22.54920401 | 21.56845829 |
| ENSMUSG000000055923 | 0.161176361  | 2.901844723  | 0.223083189 | 0.636700658 | 0.999071534 | Aasdh         | Aasdh         | AASDH    | 8.632144126 | 5.869714396 | 8.280387102 | 6.313771696 | 6.932671529 | 7.64002696  | 7.636404631  | 7.253657501 | 7.464022234 | 7.058768167 |

|                     |              |              |             |             |             |              |              |              |             |             |             |             |             |             |             |             |             |             |
|---------------------|--------------|--------------|-------------|-------------|-------------|--------------|--------------|--------------|-------------|-------------|-------------|-------------|-------------|-------------|-------------|-------------|-------------|-------------|
| ENSMUSG00000079942  | -0.572515546 | -0.734265151 | 0.222956075 | 0.63679671  | 0.999071534 | Rpl28-ps3    | Rpl28-ps3    |              | 0           | 1.363671021 | 0.403921322 | 0           | 1.177246109 | 0.436572969 | 0.19414588  | 0.207247357 | 0.864255206 | 0           |
| ENSMUSG00000019132  | 0.119370825  | 8.008567841  | 0.222930183 | 0.636816279 | 0.999071534 | BC005537     | BC005537     | C6orf62      | 221.2776458 | 254.4135806 | 241.1410293 | 274.6837598 | 287.5096608 | 341.6183483 | 210.1952732 | 262.4442366 | 242.148595  | 240.9131432 |
| ENSMUSG000000096401 | 0.340654187  | 1.413879415  | 0.222788992 | 0.636923014 | 0.999071534 | Gm21811      | Gm21811      |              | 2.666841275 | 0.948640711 | 0.740522424 | 3.746633754 | 3.400933203 | 3.274297269 | 2.265035272 | 5.319348834 | 0           | 3.267948225 |
| ENSMUSG00000020723  | 0.300406896  | 1.271537482  | 0.222773178 | 0.636934971 | 0.999071534 | Cacng4       | Cacng4       | CACNG4       | 0.561440268 | 2.608761954 | 3.433331237 | 1.80393477  | 2.223687094 | 1.236956746 | 0.517722348 | 2.279720929 | 4.00700141  | 3.464025119 |
| ENSMUSG00000045980  | -0.164769372 | 3.697290751  | 0.222748784 | 0.636953417 | 0.999071534 | Tmem104      | Tmem104      | TMEM104      | 16.28176778 | 21.2258359  | 11.2424768  | 8.395234892 | 13.7999405  | 24.30256195 | 11.32517636 | 9.257048621 | 4.871256616 | 12.02604947 |
| ENSMUSG00000000339  | -0.157516363 | 4.994650892  | 0.222473678 | 0.637161529 | 0.999071534 | Rtca         | Rtca         | RTCA         | 48.49440318 | 39.54645962 | 22.01371205 | 30.18121635 | 34.27094228 | 52.60704278 | 50.47792891 | 17.96143762 | 10.68533709 | 20.91486864 |
| ENSMUSG000000087679 | 0.111782216  | 5.908301503  | 0.222349976 | 0.637255159 | 0.999071534 | C33006A16Rik | C33006A16Rik |              | 52.91574529 | 44.46753331 | 79.97642177 | 62.30513168 | 58.53529263 | 83.16715062 | 42.97095487 | 47.11423253 | 56.0901974  | 73.13668128 |
| ENSMUSG00000040610  | -0.199631212 | 2.254711112  | 0.222231192 | 0.637345096 | 0.999071534 | Tlx3         | Tlx3         | TLX3         | 6.316203019 | 2.371601776 | 7.80914556  | 4.787365352 | 4.447374189 | 5.529924276 | 4.335924663 | 4.490359406 | 3.614158135 | 3.006512367 |
| ENSMUSG000000006378 | 0.151614313  | 4.317154855  | 0.222203431 | 0.637366119 | 0.999071534 | Gcat         | Gcat         | GCAT         | 28.35273355 | 14.11103057 | 14.00260583 | 16.9986161  | 24.39515548 | 30.12353487 | 31.51634792 | 10.0169556  | 16.65655488 | 14.24825426 |
| ENSMUSG000000033544 | -0.467996997 | -0.456956096 | 0.222123927 | 0.637426336 | 0.999071534 | Angptl1      | Angptl1      | ANGPTL1      | 1.333420637 | 0.296450222 | 1.077123525 | 0.832585279 | 0.065402562 | 0.291048646 | 0.19414588  | 0           | 0.785686551 | 1.045743432 |
| ENSMUSG00000024271  | -0.113801259 | 6.302979899  | 0.221926131 | 0.637576206 | 0.999071534 | Elp2         | Elp2         | ELP2         | 73.40831508 | 72.57101435 | 97.88360038 | 93.31893331 | 86.8546018  | 105.5051342 | 46.78915719 | 56.99302322 | 65.21198373 | 94.96657543 |
| ENSMUSG00000038068  | -0.261201083 | 2.674425958  | 0.22188197  | 0.637609678 | 0.999071534 | Rnf144b      | Rnf144b      | RNF144B      | 4.982782381 | 16.77908257 | 4.308494102 | 3.330341114 | 6.213243352 | 3.710870238 | 2.329750565 | 14.30006765 | 2.828471584 | 3.92153787  |
| ENSMUSG00000022876  | -0.222115672 | 2.760549264  | 0.221864054 | 0.637623259 | 0.999071534 | Samsn1       | Samsn1       | SAMSN1       | 11.15862533 | 11.56155866 | 3.567971678 | 4.995511672 | 6.082438228 | 8.658697221 | 8.412988152 | 3.039627905 | 1.649941757 | 9.084896066 |
| ENSMUSG000000081752 | -0.778719267 | 4.737005405  | 0.221840575 | 0.637641057 | 0.999071534 | Gm14680      | Gm14680      |              | 64.14455066 | 82.1167115  | 0           | 0           | 31.39322957 | 25.03018356 | 75.13445573 | 0           | 0           | 0           |
| ENSMUSG00000022607  | -0.101742474 | 6.589772327  | 0.221637525 | 0.637795029 | 0.999071534 | Ptk2         | Ptk2         | PTK2         | 120.6394777 | 98.30289363 | 105.8273864 | 97.41247759 | 95.029922   | 137.5204853 | 97.2670861  | 70.87859616 | 69.45469111 | 82.15621838 |
| ENSMUSG00000032417  | 0.322269937  | 0.989473515  | 0.221635587 | 0.637796499 | 0.999071534 | Rwdd2a       | Rwdd2a       | RWDD2A       | 1.543960738 | 1.719411288 | 2.154247051 | 1.873316877 | 1.177246109 | 2.619437815 | 2.459181152 | 1.174401691 | 0           | 4.117614764 |
| ENSMUSG00000042229  | -0.127783573 | 3.997242118  | 0.22158599  | 0.637834122 | 0.999071534 | Rab1f        | Rab1f        | RAB1F        | 18.66788892 | 17.90559341 | 17.43593707 | 13.94580342 | 18.11650956 | 13.31547556 | 12.23119047 | 17.75419027 | 11.94243557 | 17.25476663 |
| ENSMUSG000000032198 | 0.137269287  | 3.993196942  | 0.221536988 | 0.637871298 | 0.999071534 | Dock6        | Dock6        | DOCK6        | 15.08870721 | 15.59328168 | 16.83005509 | 14.15394974 | 16.48144552 | 20.44616739 | 8.542418739 | 18.8595095  | 11.78529826 | 20.98022761 |
| ENSMUSG00000013593  | 0.108938983  | 7.362930401  | 0.221536397 | 0.637871747 | 0.999071534 | Ndufs2       | Ndufs2       | NDUFS2       | 178.0467451 | 178.7594839 | 148.8450072 | 143.1352858 | 174.8210471 | 180.3773984 | 184.1150099 | 152.0504777 | 138.9879509 | 168.4954105 |
| ENSMUSG000000021458 | 0.110822983  | 4.867784276  | 0.221472057 | 0.637920567 | 0.999071534 | 201011101Rik | 201011101Rik | C9orf3       | 34.5285765  | 24.07175803 | 28.00521166 | 33.51155746 | 24.5259606  | 27.72238354 | 32.35764674 | 25.21509512 | 26.63477408 | 32.54876432 |
| ENSMUSG00000041736  | -0.126642459 | 8.877074061  | 0.221416056 | 0.637963066 | 0.999071534 | Tspo         | Tspo         | TSPO         | 655.4113332 | 413.0737394 | 482.9552607 | 509.5421905 | 486.6604608 | 407.4681045 | 580.6256131 | 399.5729046 | 305.1606564 | 480.519107  |
| ENSMUSG00000043336  | 0.139560605  | 5.369098087  | 0.221302364 | 0.638049369 | 0.999071534 | Filip1l      | Filip1l      | FILIP1L      | 34.17767633 | 54.54684085 | 35.54507634 | 22.34103831 | 58.66609775 | 50.64246442 | 39.08803726 | 68.46071032 | 20.58498764 | 33.20235397 |
| ENSMUSG000000005803 | -0.10651019  | 5.526775163  | 0.221289882 | 0.638058846 | 0.999071534 | Sqrdl        | Sqrdl        | RP11-96020.4 | 52.07358489 | 54.54684085 | 36.15095832 | 51.55090517 | 53.10688002 | 36.96317805 | 42.12965606 | 53.60798306 | 34.96305152 | 43.98658311 |
| ENSMUSG00000019889  | -0.117212397 | 6.528369918  | 0.221272418 | 0.638072105 | 0.999071534 | Ptprk        | Ptprk        | PTPRK        | 87.58468186 | 139.8059247 | 87.31432578 | 84.29925946 | 100.0005167 | 88.04221544 | 79.08208863 | 129.6677631 | 58.76935401 | 71.76414303 |
| ENSMUSG00000030835  | -0.151937702 | 6.156654298  | 0.221195946 | 0.638130174 | 0.999071534 | Nomo1        | Nomo1        | NOMO2        | 103.3751894 | 104.9433786 | 50.15356415 | 64.03968434 | 68.21487174 | 143.4869825 | 85.87719445 | 31.22526848 | 34.41307093 | 50.4571206  |
| ENSMUSG000000027419 | -0.416234312 | -0.44020229  | 0.22110422  | 0.638199843 | 0.999071534 | Pcsk2        | Pcsk2        | PCSK2        | 0.140360067 | 0.652190488 | 0.403921322 | 0.416292639 | 1.962076848 | 0.436572969 | 0.323576467 | 0.483577167 | 0.078568655 | 1.176461361 |
| ENSMUSG000000054894 | 0.200540844  | 2.608002705  | 0.221094412 | 0.638207293 | 0.999071534 | Atp5s        | Atp5s        | ATP5S        | 5.75476275  | 3.557402664 | 7.87646578  | 6.244389589 | 5.297607489 | 2.619437815 | 6.277383467 | 6.010173358 | 6.364061063 | 8.496665386 |
| ENSMUSG000000066677 | -0.281892199 | 0.723793525  | 0.22089512  | 0.638358726 | 0.999071534 | Pydc3        | Pydc3        |              | 1.824680872 | 1.600831199 | 1.077123525 | 3.122194795 | 0.915635862 | 1.819054038 | 0.582437641 | 1.174401691 | 1.021392516 | 2.091486864 |
| ENSMUSG000000005973 | -0.119832935 | 7.30581153   | 0.220766418 | 0.638456566 | 0.999071534 | Rcn1         | Rcn1         | RCN1         | 124.7800996 | 149.1737517 | 204.1149081 | 212.5867745 | 158.6666144 | 188.4539983 | 124.4475094 | 135.5397716 | 135.3737927 | 149.6066698 |
| ENSMUSG00000041845  | -0.109531115 | 5.300539201  | 0.220480857 | 0.638673773 | 0.999071534 | Rhod         | Rhod         | RHOD         | 45.96792197 | 43.28173242 | 38.91108736 | 36.70313436 | 47.3514546  | 31.79706459 | 46.72444189 | 44.6963467  | 21.05639957 | 38.69250699 |
| ENSMUSG000000037369 | 0.104046288  | 4.893625307  | 0.220071592 | 0.638985374 | 0.999071534 | Kdm6a        | Kdm6a        | KDM6A        | 27.30003305 | 28.22206114 | 32.85226753 | 26.98963945 | 32.83208592 | 33.83440511 | 27.56871502 | 37.4426892  | 21.5278115  | 28.3657906  |
| ENSMUSG000000032482 | -0.323938458 | 0.440934209  | 0.220048033 | 0.639003322 | 0.999071534 | Cspg5        | Cspg5        | CSPG5        | 1.684320805 | 0.948640711 | 2.01906661  | 1.665170557 | 0.719428178 | 0.291048646 | 0.388291761 | 1.381649048 | 0.864255206 | 2.156845829 |
| ENSMUSG000000031196 | 0.360319357  | -0.287517349 | 0.219920784 | 0.639100283 | 0.999071534 | F8           | F8           | F8           | 0.210540101 | 0.770770577 | 0.471241542 | 1.110113705 | 0.523220493 | 0.727621615 | 0.258861174 | 0.621742072 | 0.785686551 | 1.30717929  |
| ENSMUSG000000036206 | -0.113955902 | 6.104886208  | 0.219902506 | 0.639114214 | 0.999071534 | Sh3bp4       | Sh3bp4       | SH3BP4       | 67.7939124  | 87.15636528 | 69.60910783 | 53.49360415 | 94.50670151 | 74.94502637 | 41.15892665 | 84.21150947 | 46.27693785 | 73.659553   |
| ENSMUSG000000000420 | 0.107832158  | 7.079293724  | 0.219892498 | 0.639121842 | 0.999071534 | Galnt1       | Galnt1       | GALNT1       | 116.7795758 | 159.4902195 | 126.9659356 | 125.7897592 | 146.6325431 | 162.8417175 | 162.2412408 | 121.5160338 | 114.0816872 | 118.8879564 |
| ENSMUSG000000047694 | -0.098685525 | 5.392210202  | 0.219441131 | 0.639466079 | 0.999071534 | Yipf6        | Yipf6        | YIPF6        | 37.68667801 | 51.34517846 | 41.46925573 | 41.21297129 | 53.36849026 | 48.67788606 | 42.38851723 | 35.57746298 | 26.47763677 | 44.77089069 |
| ENSMUSG000000038291 | -0.104244014 | 5.112954953  | 0.219431453 | 0.639473464 | 0.999071534 | Snx25        | Snx25        | SNX25        | 29.89669429 | 44.52682335 | 36.15095832 | 32.47082586 | 42.64247016 | 38.27289696 | 28.86302089 | 39.79149258 | 25.61338156 | 28.43114956 |
| ENSMUSG000000009073 | -0.135340157 | 5.016773718  | 0.219284968 | 0.639585277 | 0.999071534 | Nf2          | Nf2          | NF2          | 45.4064817  | 40.91013064 | 29.62089695 | 23.79806255 | 36.62543449 | 62.79374539 | 30.93391028 | 27.56389851 | 12.49241616 | 23.26779136 |
| ENSMUSG000000035373 | 0.150477405  | 8.327410095  | 0.219089603 | 0.639734472 | 0.999071534 | Cc17         | Cc17         | CCL7         | 418.3431799 | 194.7085058 | 273.9932968 | 397.6288526 | 289.0139197 | 228.3276629 | 473.3923718 | 245.4499534 | 228.3990804 | 445.9442148 |

|                     |              |              |             |             |             |               |               |            |             |             |             |             |             |             |             |             |             |             |
|---------------------|--------------|--------------|-------------|-------------|-------------|---------------|---------------|------------|-------------|-------------|-------------|-------------|-------------|-------------|-------------|-------------|-------------|-------------|
| ENSMUSG00000047654  | 0.288689878  | 0.586057507  | 0.21887345  | 0.639899637 | 0.999071534 | Tsk6          | Tsk6          | TSSK6      | 1.894860906 | 1.363671021 | 0.605881983 | 1.457024238 | 1.046440986 | 2.619437815 | 2.070889391 | 1.174401691 | 0.31427462  | 1.437897219 |
| ENSMUSG00000022433  | 0.146287363  | 7.274909764  | 0.218836957 | 0.639927531 | 0.999071534 | Csnk1e        | Csnk1e        | CSNK1E     | 119.6569572 | 132.157509  | 181.495314  | 165.8926168 | 161.0211066 | 129.4438853 | 71.12210753 | 218.4387145 | 166.8012548 | 178.8874858 |
| ENSMUSG000000035778 | 0.11120164   | 6.21556946   | 0.218814737 | 0.639944517 | 0.999071534 | Ggta1         | Ggta1         |            | 73.61885519 | 98.5400538  | 59.30911412 | 51.06523042 | 89.99392476 | 84.9134425  | 96.42578728 | 82.41536571 | 53.42668547 | 57.38517084 |
| ENSMUSG000000050587 | 0.361679918  | -0.14826296  | 0.218792639 | 0.639961411 | 0.999071534 | Lrrc4c        | Lrrc4c        | LRRC4C     | 0.280720134 | 0.592900444 | 0.673202203 | 1.387642131 | 0.523220493 | 0.873145938 | 0.19414588  | 0.552659619 | 1.021392516 | 1.503256184 |
| ENSMUSG00000029071  | 0.103143697  | 6.209976695  | 0.218781319 | 0.639970065 | 0.999071534 | Dvl1          | Dvl1          | DVL1       | 71.23273404 | 70.55515284 | 72.63851775 | 74.1694719  | 81.16457894 | 74.65397772 | 53.71369359 | 85.31682871 | 64.66200315 | 88.5613969  |
| ENSMUSG00000073274  | 0.408708377  | -0.05503088  | 0.218756948 | 0.639988698 | 0.999071534 | Gm14636       | Gm14636       |            | 0.421080201 | 1.719411288 | 0.269280881 | 0           | 1.308051232 | 0.654859454 | 0.711868228 | 0.898071881 | 0.392843275 | 1.895409971 |
| ENSMUSG00000035045  | -0.195450382 | 2.21812905   | 0.218683302 | 0.640045013 | 0.999071534 | Zc3h12b       | Zc3h12b       | ZC3H12B    | 3.509001677 | 5.098943819 | 6.799342255 | 4.02416218  | 5.624620297 | 2.910486461 | 3.17104938  | 4.283112048 | 4.478413341 | 4.967281302 |
| ENSMUSG00000028273  | 0.118773471  | 7.330700203  | 0.218647436 | 0.640072442 | 0.999071534 | Pdlm5         | Pdlm5         | PDLIM5     | 127.9382011 | 220.9147055 | 147.2293219 | 132.2422951 | 174.2978267 | 209.7005495 | 138.9437351 | 195.917835  | 133.4095764 | 135.3584155 |
| ENSMUSG00000034974  | -0.09760485  | 5.54381161   | 0.218519652 | 0.640170191 | 0.999071534 | Dapk3         | Dapk3         | DAPK3      | 54.31934596 | 43.93392291 | 59.2417939  | 48.15118194 | 43.81971627 | 52.09770765 | 37.40543963 | 44.48909934 | 32.44885456 | 52.15645367 |
| ENSMUSG00000022119  | 0.102627948  | 5.349582402  | 0.218402373 | 0.640259936 | 0.999071534 | Rbm26         | Rbm26         | RBM26      | 41.61675989 | 31.18656336 | 52.50977187 | 37.53571964 | 40.54958819 | 45.69463744 | 39.79990549 | 38.75525579 | 40.38428872 | 37.1892508  |
| ENSMUSG00000049985  | 0.306266843  | 0.556347641  | 0.218372346 | 0.640282917 | 0.999071534 | Ankrd55       | Ankrd55       | ANKRD55    | 0.561440268 | 0.889350666 | 1.211763966 | 1.387642131 | 2.158284533 | 0.727621615 | 0.970729402 | 3.315957715 | 0.942823861 | 1.045743432 |
| ENSMUSG00000027377  | -0.468297237 | -0.52281303  | 0.218259298 | 0.640369459 | 0.999071534 | Mall          | Mall          | MALL       | 0.421080201 | 0.355740266 | 1.683005509 | 0           | 0.915635862 | 1.018670261 | 0.647152935 | 0.345412262 | 0           | 0.392153787 |
| ENSMUSG00000040562  | -0.138212436 | 4.026023211  | 0.218258595 | 0.640369997 | 0.999071534 | Gstm2         | Gstm2         |            | 14.87816711 | 13.81458035 | 20.73462787 | 18.17811192 | 20.14398897 | 11.78747017 | 12.10175988 | 20.44840591 | 10.60676844 | 18.69266385 |
| ENSMUSG00000070025  | -0.413616724 | -0.198407233 | 0.217888112 | 0.640653804 | 0.999071534 | Gm10284       | Gm10284       |            | 0.140360067 | 0.592900444 | 0.605881983 | 1.248877918 | 1.765869163 | 0           | 0.647152935 | 0.828989429 | 0.471411931 | 0.980384468 |
| ENSMUSG00000032611  | 0.307572088  | 0.426858388  | 0.217869509 | 0.640668063 | 0.999071534 | 1700102P08Rik | 1700102P08Rik | C3orf62    | 0.98252047  | 1.126510844 | 1.077123525 | 0.832585279 | 1.63506404  | 1.018670261 | 0.323576467 | 0.828989429 | 1.492804447 | 2.679717545 |
| ENSMUSG00000062937  | 0.12403364   | 6.922742455  | 0.217866893 | 0.640670068 | 0.999071534 | Mtap          | Mtap          | MTAP       | 134.5351243 | 93.02607697 | 136.7273675 | 112.1214842 | 126.0961388 | 169.390312  | 188.7097958 | 69.49694711 | 87.05406985 | 108.2344452 |
| ENSMUSG00000021111  | 0.103243773  | 6.88539418   | 0.217854589 | 0.640679499 | 0.999071534 | Papola        | Papola        | PAPOLA     | 106.1823907 | 125.517024  | 134.5731205 | 97.62062391 | 128.3852284 | 160.0767553 | 133.7017963 | 98.99515428 | 97.89654425 | 106.4043942 |
| ENSMUSG00000026234  | -0.132294923 | 9.31149046   | 0.217819802 | 0.640706165 | 0.999071534 | Ncl           | Ncl           | NCL        | 487.4003329 | 657.5265925 | 952.7830785 | 577.2591265 | 775.8705882 | 924.4432621 | 391.9158173 | 538.1523041 | 491.5255063 | 631.7597509 |
| ENSMUSG00000024472  | -0.113944143 | 5.151238047  | 0.217807311 | 0.64071574  | 0.999071534 | Dcp2          | Dcp2          | DCP2       | 41.26585972 | 38.24207864 | 42.61369948 | 36.14807751 | 32.7012808  | 58.93735083 | 30.48909323 | 21.41556024 | 30.56320683 | 26.60109855 |
| ENSMUSG00000055633  | -0.209130664 | 2.89953132   | 0.21775144  | 0.640758575 | 0.999071534 | Zfp580        | Zfp580        | ZNF580     | 5.123142449 | 6.344034752 | 11.915679   | 9.991023343 | 7.128879214 | 4.80230266  | 2.588611739 | 6.908245239 | 5.264099892 | 12.81035704 |
| ENSMUSG00000090272  | -0.222892328 | 1.580850879  | 0.217672626 | 0.640819011 | 0.999071534 | Mndal         | Mndal         | MNDA       | 4.280982046 | 4.446753331 | 0.329409915 | 1.942698983 | 2.354492217 | 2.619437815 | 1.423736457 | 2.763298096 | 2.907040239 | 2.810435474 |
| ENSMUSG00000021902  | 0.222377523  | 1.960493428  | 0.217644993 | 0.640840204 | 0.999071534 | Phf7          | Phf7          | PHF7       | 4.140621979 | 4.624623464 | 2.558168373 | 1.387642131 | 5.493815174 | 5.384399953 | 6.147952881 | 3.661369977 | 1.649941757 | 3.267948225 |
| ENSMUSG00000070733  | -0.130000583 | 4.881291414  | 0.217387481 | 0.641037777 | 0.999071534 | Fryl          | Fryl          | FRYL       | 26.52805268 | 26.02832949 | 34.40063259 | 32.19329744 | 39.89556257 | 38.92775641 | 12.03704459 | 31.01802112 | 26.71334273 | 26.99325234 |
| ENSMUSG00000025223  | -0.102658783 | 6.052438214  | 0.217335177 | 0.641077925 | 0.999071534 | Ldb1          | Ldb1          | LDB1       | 75.30317599 | 68.00568093 | 77.21629273 | 63.27648117 | 72.72764849 | 76.47303176 | 42.38851723 | 68.32254542 | 45.56981996 | 78.30003948 |
| ENSMUSG00000043683  | -0.114890969 | 4.375155191  | 0.217218097 | 0.641167814 | 0.999071534 | Fem1a         | Fem1a         | FEM1A      | 26.73859278 | 24.30891821 | 21.34050985 | 16.44355925 | 22.95629912 | 30.05077271 | 18.57328923 | 16.64887103 | 16.34228026 | 15.62079252 |
| ENSMUSG00000097337  | 0.360035725  | 0.288229207  | 0.217196539 | 0.641184367 | 0.999071534 | Gm26606       | Gm26606       |            | 1.052700503 | 0.711480533 | 1.279084186 | 0.346910533 | 1.63506404  | 0.072762162 | 0.647152935 | 1.243484143 | 1.492804447 | 2.156845829 |
| ENSMUSG00000083819  | -0.640289872 | -1.173734207 | 0.217170551 | 0.641204326 | 0.999071534 | Gm11977       | Gm11977       |            | 0.350900168 | 0.415030311 | 0           | 0           | 1.177246109 | 1.018670261 | 0.064715293 | 0.207247357 | 0           | 0           |
| ENSMUSG00000047496  | 0.195878076  | 3.85466786   | 0.217069894 | 0.641281639 | 0.999071534 | Rnf152        | Rnf152        | RNF152     | 7.93034379  | 8.300606217 | 25.11044219 | 15.47220976 | 12.0994739  | 11.20537287 | 5.306654065 | 14.507315   | 18.85647722 | 21.43774036 |
| ENSMUSG00000044246  | -0.142106296 | 4.19392966   | 0.21699734  | 0.641337381 | 0.999071534 | Dhx29         | Dhx29         | DHX29      | 20.63292986 | 20.98867572 | 15.68561134 | 16.79046978 | 25.24538878 | 37.2542267  | 15.53167044 | 10.63869767 | 11.70672961 | 12.48356222 |
| ENSMUSG00000028207  | 0.103103365  | 6.559382541  | 0.216980495 | 0.641350324 | 0.999071534 | Asph          | Asph          | AC090094.1 | 66.67103186 | 109.3308419 | 93.91170738 | 87.14392583 | 114.716093  | 105.5051342 | 95.51977318 | 93.95213526 | 83.91132364 | 91.04503756 |
| ENSMUSG00000008307  | -0.338131899 | 0.291226238  | 0.216921445 | 0.641395701 | 0.999071534 | 1700109H08Rik | 1700109H08Rik |            | 1.754500839 | 0.592900444 | 2.962089695 | 0.416292639 | 0.654025616 | 0.582097292 | 0.970729402 | 0.621742072 | 1.492804447 | 0.784307574 |
| ENSMUSG00000024805  | -0.124003508 | 4.288382007  | 0.216849104 | 0.641451303 | 0.999071534 | Pcgf5         | Pcgf5         | PCGF5      | 18.10644865 | 20.6922255  | 22.48495359 | 19.63513615 | 24.19894779 | 17.46291877 | 15.59638573 | 26.80399153 | 11.78529826 | 18.0390742  |
| ENSMUSG00000007036  | 0.098291228  | 4.914604769  | 0.216717191 | 0.64155272  | 0.999071534 | Abhd16a       | Abhd16a       | ABHD16A    | 29.75633422 | 27.98490096 | 28.07253188 | 31.7770048  | 32.83208592 | 37.39975102 | 28.7983056  | 28.32380548 | 26.00622484 | 29.99976471 |
| ENSMUSG00000059900  | 0.2043777    | 3.178494052  | 0.216688471 | 0.641574805 | 0.999071534 | Tmem40        | Tmem40        | TMEM40     | 9.333944461 | 9.842147372 | 4.914376085 | 13.8070392  | 4.708984435 | 5.602686437 | 7.959981098 | 15.12905707 | 10.44963113 | 5.294076125 |
| ENSMUSG00000021719  | 0.511636964  | -0.542026028 | 0.216625247 | 0.64162343  | 0.999071534 | Rgs7bp        | Rgs7bp        | RGS7BP     | 0.140360067 | 0           | 1.144443746 | 0.901967385 | 0.130805123 | 0.727621615 | 0.517722348 | 0           | 0.392843275 | 1.568615148 |
| ENSMUSG00000025888  | -0.107262936 | 5.886721186  | 0.216607146 | 0.641637353 | 0.999071534 | Casp1         | Casp1         | CASP1      | 86.53198136 | 49.50718708 | 49.27840129 | 77.15290248 | 54.48033381 | 62.2116481  | 54.16670064 | 58.37467227 | 37.71295445 | 64.11714418 |
| ENSMUSG00000056708  | 0.109904771  | 6.981747339  | 0.216542842 | 0.64168682  | 0.999071534 | Ier5          | Ier5          | IER5       | 144.7814092 | 119.4101494 | 140.2953392 | 97.96753445 | 130.085695  | 129.4438853 | 102.314879  | 155.5046003 | 116.4387469 | 123.2016481 |
| ENSMUSG00000044176  | 0.376833044  | 0.289659432  | 0.216538422 | 0.64169022  | 0.999071534 | Spink10       | Spink10       |            | 1.052700503 | 0.830060622 | 1.750325729 | 1.040731598 | 0.261610246 | 0.582097292 | 0.064715293 | 0.828989429 | 1.807079067 | 2.418281687 |
| ENSMUSG00000039086  | 0.206050027  | 2.089574221  | 0.21651875  | 0.641705355 | 0.999071534 | Ss18l1        | Ss18l1        | SS18L1     | 2.807201342 | 3.853852886 | 4.308494102 | 4.162926393 | 4.708984435 | 2.983248622 | 3.235764674 | 6.424668073 | 2.357059653 | 6.209101628 |

|                     |              |              |             |             |             |               |               |            |             |             |             |             |             |             |             |             |             |             |
|---------------------|--------------|--------------|-------------|-------------|-------------|---------------|---------------|------------|-------------|-------------|-------------|-------------|-------------|-------------|-------------|-------------|-------------|-------------|
| ENSMUSG00000044447  | 0.103353566  | 5.491030483  | 0.216247378 | 0.641914225 | 0.999071534 | Dock5         | Dock5         | DOCK5      | 37.26559781 | 55.08045125 | 43.55618256 | 36.98066279 | 52.12584159 | 65.34042105 | 32.7459385  | 46.56157291 | 38.34150369 | 43.85586518 |
| ENSMUSG00000044701  | -0.445903455 | -0.543285783 | 0.216203565 | 0.641947962 | 0.999071534 | Il27          | Il27          | IL27       | 1.543960738 | 0.355740266 | 0.740522424 | 0.346910533 | 0.327012808 | 0.363810808 | 0.129430587 | 0.345412262 | 0           | 1.437897219 |
| ENSMUSG00000082896  | 0.329052976  | 1.066302816  | 0.216124361 | 0.642008962 | 0.999071534 | Gm5844        | Gm5844        |            | 2.596661241 | 1.48225111  | 2.827449254 | 1.665170557 | 0.457817931 | 4.220205368 | 0.711868228 | 0.138164905 | 2.907040239 | 2.745076509 |
| ENSMUSG00000033857  | 0.226547874  | 1.71270449   | 0.216087618 | 0.642037265 | 0.999071534 | Engase        | Engase        | ENGASE     | 2.596661241 | 2.608761954 | 3.433331237 | 3.052812688 | 3.335530641 | 5.311637791 | 2.006174098 | 1.243484143 | 2.749902928 | 5.424794054 |
| ENSMUSG00000054967  | 0.21393986   | 1.612970256  | 0.215823855 | 0.642240523 | 0.999071534 | Zfp647        | Zfp647        | ZNF250     | 2.245761073 | 3.201662398 | 2.962089695 | 2.22022741  | 3.466335765 | 2.910486461 | 1.812028217 | 4.490359406 | 2.514196963 | 3.33330719  |
| ENSMUSG00000020167  | 0.135830219  | 7.251580615  | 0.215761714 | 0.642288431 | 0.999071534 | Tcf3          | Tcf3          | TCF3       | 119.7973173 | 109.0936817 | 188.4292967 | 152.0161954 | 182.8001597 | 155.4927392 | 85.10061093 | 148.5963551 | 179.4508082 | 184.9658695 |
| ENSMUSG00000029681  | -0.121956727 | 4.414539754  | 0.215733797 | 0.642309957 | 0.999071534 | Bcl7b         | Bcl7b         | BCL7B      | 22.73833087 | 22.76737705 | 26.05292527 | 15.05591712 | 28.71172454 | 29.54143758 | 23.8155228  | 20.44840591 | 11.15674902 | 15.75151045 |
| ENSMUSG00000025002  | 0.313785162  | 0.94022263   | 0.215723661 | 0.642317772 | 0.999071534 | Cyp2c55       | Cyp2c55       | CYP2C18    | 1.19306057  | 0.5336104   | 2.086926831 | 2.428373729 | 1.962076848 | 0.436572969 | 1.229590576 | 1.4507315   | 1.099961171 | 5.163358196 |
| ENSMUSG00000026806  | 0.133439847  | 3.737985914  | 0.215718271 | 0.642321928 | 0.999071534 | Ddx31         | Ddx31         | DDX31      | 14.52726694 | 10.73149804 | 13.06012275 | 15.12529923 | 11.77246109 | 18.77263767 | 16.50239984 | 10.1551205  | 11.39245499 | 10.71887018 |
| ENSMUSG00000029560  | -0.11036124  | 5.031439542  | 0.215691244 | 0.64234277  | 0.999071534 | Snx8          | Snx8          | SNX8       | 36.00235721 | 31.00869322 | 39.92089066 | 34.89919959 | 33.61691666 | 50.13312929 | 37.79373139 | 26.73490908 | 17.12796681 | 24.70568858 |
| ENSMUSG00000029528  | -0.112820042 | 6.494171029  | 0.215688086 | 0.642345206 | 0.999071534 | Pxn           | Pxn           | PXN        | 121.2009179 | 116.5049373 | 74.65812436 | 59.73799374 | 117.3975981 | 122.6042422 | 67.69219698 | 93.19222828 | 58.69078536 | 83.39803871 |
| ENSMUSG00000017418  | 0.158391994  | 3.674935356  | 0.215643935 | 0.642379257 | 0.999071534 | Arl5b         | Arl5b         | ARL5B      | 6.456563086 | 19.6250047  | 10.83855548 | 11.58681179 | 13.47292769 | 10.76879991 | 12.42533635 | 17.96143762 | 11.62816095 | 10.58815225 |
| ENSMUSG00000075703  | 0.094443981  | 5.879559529  | 0.215535713 | 0.642462739 | 0.999071534 | Ept1          | Ept1          | EPT1       | 62.46022985 | 56.14767205 | 57.42414795 | 60.3624327  | 58.40448751 | 76.76408041 | 74.55201809 | 54.8514672  | 40.30572007 | 51.04535128 |
| ENSMUSG00000034271  | -0.137121389 | 4.884511897  | 0.215505383 | 0.642486141 | 0.999071534 | Jdp2          | Jdp2          | JDP2       | 45.6170218  | 33.97319545 | 21.87907161 | 23.24300569 | 36.29842169 | 44.02110772 | 38.95860667 | 19.55033403 | 11.15674902 | 27.32004716 |
| ENSMUSG00000026662  | 0.113138211  | 5.238520795  | 0.215371649 | 0.642589347 | 0.999071534 | Sephs1        | Sephs1        | SEPHS1     | 46.038102   | 28.34064123 | 36.01631788 | 36.63375226 | 40.81119844 | 60.97469136 | 47.04801836 | 24.80060041 | 30.64177549 | 29.60761092 |
| ENSMUSG00000038437  | -0.112607339 | 5.162238025  | 0.215294797 | 0.642648675 | 0.999071534 | Mlt6          | Mlt6          | MLLT6      | 39.93243909 | 37.82704833 | 38.50716604 | 32.40144376 | 44.21213164 | 34.34374024 | 19.54401863 | 39.79149258 | 33.31310976 | 36.40494323 |
| ENSMUSG00000002625  | 0.137523299  | 5.023599409  | 0.215195711 | 0.642725184 | 0.999071534 | Akap8l        | Akap8l        | AKAP8L     | 24.70337181 | 31.89804389 | 33.99671127 | 34.9685817  | 34.14013715 | 22.70179439 | 16.69654572 | 45.80166594 | 32.21314859 | 42.15653211 |
| ENSMUSG000000001105 | 0.126214378  | 6.225461142  | 0.215079467 | 0.64281497  | 0.999071534 | Ift20         | Ift20         | IFT20      | 91.0235035  | 53.42033001 | 74.72544458 | 91.0987059  | 58.79690287 | 49.04169687 | 88.07751443 | 65.14475261 | 84.46130423 | 78.30003948 |
| ENSMUSG000000001855 | -0.112712322 | 4.638613806  | 0.21501973  | 0.642861121 | 0.999071534 | Nup214        | Nup214        | NUP214     | 27.08949295 | 26.32477972 | 29.21697563 | 25.81014364 | 25.11458365 | 33.97992943 | 14.8845175  | 20.79381817 | 21.13496822 | 25.29391926 |
| ENSMUSG00000080932  | -0.38904781  | 0.63875024   | 0.214941583 | 0.642921508 | 0.999071534 | Gm10224       | Gm10224       |            | 0.561440268 | 0.177870133 | 2.558168373 | 2.567137942 | 2.419894779 | 1.673529715 | 2.329750565 | 1.4507315   | 0.628549241 | 0           |
| ENSMUSG00000083320  | -0.403565759 | -0.29029131  | 0.214838335 | 0.643001311 | 0.999071534 | Gm13935       | Gm13935       |            | 1.473780704 | 1.719411288 | 0.134640441 | 0.138764213 | 0.588623054 | 0.509335131 | 0.970729402 | 0.207247357 | 0.235705965 | 0.915025503 |
| ENSMUSG00000054426  | -0.208832588 | 2.330579015  | 0.214687233 | 0.643118144 | 0.999071534 | A930005H10Rik | A930005H10Rik |            | 7.158363421 | 3.201662398 | 9.559471289 | 4.02416218  | 3.335530641 | 5.23887563  | 3.882917609 | 2.763298096 | 2.985608894 | 7.320204025 |
| ENSMUSG00000037638  | -0.205329764 | 1.964417022  | 0.214652772 | 0.643144797 | 0.999071534 | Zbtb42        | Zbtb42        | ZBTB42     | 4.35116208  | 4.387463286 | 4.510454763 | 2.705902155 | 5.101399804 | 4.729540499 | 3.947632902 | 4.490359406 | 1.099961171 | 3.137230296 |
| ENSMUSG000000021711 | 0.099397618  | 5.664659417  | 0.214385343 | 0.643351717 | 0.999071534 | Trappc13      | Trappc13      | TRAPPC13   | 49.19620351 | 44.82327357 | 47.79735644 | 56.40765262 | 54.87274918 | 68.03262102 | 62.32082762 | 35.85379279 | 43.84130954 | 45.09768551 |
| ENSMUSG00000059278  | 0.107421634  | 5.476871375  | 0.214246942 | 0.643458865 | 0.999071534 | Lsmd1         | Naa38         | NAA38      | 50.81034428 | 32.90597465 | 48.53787887 | 49.12253144 | 39.96096514 | 38.92775641 | 56.82002767 | 38.96250315 | 39.59860217 | 45.81663412 |
| ENSMUSG000000019975 | 0.123245324  | 7.134748352  | 0.214037487 | 0.643621101 | 0.999071534 | Ikbip         | Ikbip         | IKBIP      | 120.0078574 | 127.9479158 | 147.4986028 | 161.1052514 | 138.5226255 | 94.37252349 | 155.7697114 | 174.4331923 | 131.209654  | 135.0316207 |
| ENSMUSG000000002250 | -0.117930651 | 5.475407038  | 0.213917013 | 0.64371446  | 0.999071534 | Ppard         | Ppard         | PPARD      | 43.932701   | 62.96602716 | 52.98101341 | 27.40593209 | 53.95711332 | 65.84975618 | 33.84609849 | 51.19009722 | 24.43485174 | 35.94743048 |
| ENSMUSG00000026972  | 0.111259267  | 4.346940611  | 0.213805714 | 0.643800737 | 0.999071534 | Arrdc1        | Arrdc1        | ARRDC1     | 21.82599043 | 17.78701332 | 19.1862628  | 19.42698983 | 22.76009144 | 22.92008088 | 16.17882337 | 22.10638477 | 17.28510412 | 22.81027861 |
| ENSMUSG000000017774 | -0.125738784 | 6.927651675  | 0.213682006 | 0.643896666 | 0.999071534 | Myo1c         | Myo1c         | MYO1C      | 160.0104765 | 173.0083496 | 120.5031944 | 78.54054461 | 131.4591488 | 216.1036197 | 117.97598   | 92.08690904 | 73.46169252 | 85.03201282 |
| ENSMUSG00000009030  | 0.106566629  | 5.071733486  | 0.213596473 | 0.643963011 | 0.999071534 | Pdcl          | Pdcl          | PDCL       | 33.12497583 | 27.92561092 | 34.7372337  | 38.36830492 | 32.76668336 | 31.21496729 | 40.7059196  | 26.113167   | 32.29171725 | 35.55527669 |
| ENSMUSG00000058932  | 0.382306288  | -0.188262626 | 0.213562455 | 0.643989403 | 0.999071534 | Gm2174        | Gm2174        |            | 0.350900168 | 0.711480533 | 0.538561763 | 0.901967385 | 0.850233301 | 0.800383777 | 1.035444696 | 1.243484143 | 0.942823861 | 0           |
| ENSMUSG000000097002 | -0.313094109 | 0.166440586  | 0.213549388 | 0.643999541 | 0.999071534 | Gm2670        | Gm2670        |            | 0.631620302 | 1.007930755 | 2.086926831 | 0.763203172 | 1.177246109 | 0.800383777 | 1.29430587  | 1.174401691 | 0.235705965 | 0.784307574 |
| ENSMUSG000000073079 | -0.673012958 | 2.88317781   | 0.213372728 | 0.64413664  | 0.999071534 | Srp54a        | Srp54a        | SRP54      | 11.01826527 | 28.75567154 | 0.06732022  | 0           | 7.063476652 | 16.29872418 | 13.8490728  | 0           | 0           | 0           |
| ENSMUSG000000004085 | -0.105684534 | 6.563671941  | 0.213359064 | 0.644147248 | 0.999071534 | Zak           | Zak           | AC013461.1 | 82.88261961 | 85.02192368 | 138.410373  | 104.5588346 | 95.94555786 | 130.3170313 | 77.78778276 | 80.61922194 | 69.84753438 | 88.03852519 |
| ENSMUSG00000038365  | 0.122203459  | 4.027574864  | 0.213278332 | 0.644209926 | 0.999071534 | Fbxo25        | Fbxo25        | FBXO25     | 16.56248792 | 16.89766266 | 12.72352164 | 18.66378666 | 15.36960198 | 18.77263767 | 16.63183042 | 13.0565835  | 13.27810271 | 19.99984314 |
| ENSMUSG000000015852 | -0.256139169 | 4.799547639  | 0.213166145 | 0.644297049 | 0.999071534 | Fcrls         | Fcrls         |            | 34.59875654 | 28.75567154 | 22.08103227 | 40.72729654 | 29.69276296 | 79.96561551 | 40.12348196 | 3.799534882 | 4.00700141  | 8.888819173 |
| ENSMUSG00000029227  | 0.107460466  | 6.598173861  | 0.21313441  | 0.6443217   | 0.999071534 | Fip1l1        | Fip1l1        | FIP1L1     | 80.77721861 | 99.72585469 | 92.02674121 | 81.10768256 | 131.4591488 | 103.7588423 | 82.51199919 | 129.4605158 | 71.49747614 | 97.7770109  |
| ENSMUSG00000068206  | 0.140070315  | 3.799460648  | 0.21311868  | 0.644333919 | 0.999071534 | Pick1         | Pick1         | PICK1      | 12.07096577 | 10.19788764 | 16.42613376 | 13.11321814 | 16.28523784 | 15.1345296  | 8.412988152 | 15.47446934 | 13.27810271 | 16.99333077 |
| ENSMUSG00000036983  | 0.201793191  | 2.282712077  | 0.213075202 | 0.644367696 | 0.999071534 | Tfb1m         | Tfb1m         | TFB1M      | 6.316203019 | 2.608761954 | 4.039213221 | 4.093544286 | 5.886230544 | 6.112021568 | 8.865995207 | 3.039627905 | 3.457020824 | 3.33330719  |

|                      |              |              |             |             |             |          |          |           |             |             |             |             |             |             |             |             |             |             |
|----------------------|--------------|--------------|-------------|-------------|-------------|----------|----------|-----------|-------------|-------------|-------------|-------------|-------------|-------------|-------------|-------------|-------------|-------------|
| ENSMUSG00000025103   | -0.097769477 | 6.332384926  | 0.212934677 | 0.644476894 | 0.999071534 | Btbd1    | Btbd1    | BTBD1     | 89.61990283 | 78.26285862 | 78.4280567  | 97.06556706 | 87.44322485 | 85.13172898 | 90.40726499 | 72.39841011 | 64.7405718  | 62.67924696 |
| ENSMUSG000000097789  | -0.10486716  | 5.546673729  | 0.212713385 | 0.644648943 | 0.999071534 | Gm2115   | Gm2115   | LINC01314 | 44.70468137 | 49.21073686 | 58.77055236 | 48.7062388  | 49.11732376 | 75.59988582 | 34.6873973  | 30.67260886 | 36.29871866 | 45.09768551 |
| ENSMUSG00000040387   | 0.42327582   | -0.128599327 | 0.212299737 | 0.644970834 | 0.999071534 | Klh32    | Klh32    | KLHL32    | 0.421080201 | 0           | 1.817645949 | 0.971349492 | 0.261610246 | 0.363810808 | 0.388291761 | 0.828989429 | 1.335667137 | 1.241820326 |
| ENSMUSG000000085436  | 0.372363702  | -0.250513533 | 0.21223539  | 0.645020942 | 0.999071534 | Gm11458  | Zfp335os |           | 0.140360067 | 0.177870133 | 1.615685288 | 0.346910533 | 0.915635862 | 1.45524323  | 0.841298815 | 0.552659619 | 0.549980586 | 0.588230681 |
| ENSMUSG000000056185  | -0.268574809 | 1.216653103  | 0.212209407 | 0.645041177 | 0.999071534 | Snx32    | Snx32    | SNX32     | 3.649361744 | 1.067220799 | 3.029409915 | 2.22022741  | 2.485297341 | 1.236956746 | 0.711868228 | 2.625133191 | 1.021392516 | 3.92153787  |
| ENSMUSG00000030272   | 0.110460124  | 6.099566407  | 0.212197937 | 0.645050111 | 0.999071534 | Camk1    | Camk1    | CAMK1     | 72.77669478 | 73.51965506 | 58.50127148 | 60.4318148  | 77.37123037 | 69.7789129  | 104.3857684 | 76.05978009 | 38.18436638 | 58.3655553  |
| ENSMUSG00000019303   | 0.130027694  | 4.469902287  | 0.21207608  | 0.645145037 | 0.999071534 | Psmc3ip  | Psmc3ip  | PSMC3IP   | 28.28255352 | 20.45506532 | 22.88887492 | 17.76181928 | 20.14398897 | 22.55627007 | 39.08803726 | 15.19813953 | 15.87086833 | 19.08481764 |
| ENSMUSG000000029171  | 0.092570986  | 5.499434466  | 0.212034612 | 0.645177348 | 0.999071534 | Pgm1     | Pgm1     | PGM2      | 41.75711996 | 46.00907446 | 46.11435093 | 42.46184921 | 50.42537499 | 48.53236174 | 49.37776892 | 47.52872725 | 36.29871866 | 43.07155761 |
| ENSMUSG00000020444   | 0.145304233  | 5.150204306  | 0.211901456 | 0.645281127 | 0.999071534 | Guk1     | Guk1     | GUK1      | 56.2843869  | 26.50264985 | 30.09213849 | 33.9278501  | 27.86149124 | 50.42417793 | 64.19757113 | 17.06336574 | 22.78490998 | 29.60761092 |
| ENSMUSG000000001131  | 0.128617183  | 9.094426323  | 0.211857406 | 0.645315467 | 0.999071534 | Timp1    | Timp1    | TIMP1     | 676.1144431 | 487.7791953 | 675.3564505 | 475.8224867 | 396.4049258 | 442.3211799 | 594.7335471 | 556.1828242 | 567.5799644 | 536.7278165 |
| ENSMUSG00000028552   | -0.10241878  | 6.879346658  | 0.211722884 | 0.645420364 | 0.999071534 | Eps15    | Eps15    | EPS15     | 128.2189213 | 138.1458035 | 116.1273801 | 118.9903127 | 131.2629411 | 149.8900527 | 135.5138245 | 106.7323889 | 75.11163427 | 90.19537102 |
| ENSMUSG000000026135  | 0.138787925  | 3.823496498  | 0.211507878 | 0.645588104 | 0.999071534 | Zfp142   | Zfp142   | ZNF142    | 11.5095255  | 14.11103057 | 16.08953266 | 12.21125075 | 15.43500454 | 18.918162   | 7.636404631 | 16.57978857 | 10.99961171 | 17.51620249 |
| ENSMUSG000000047583  | 0.191549141  | 2.333538091  | 0.211473121 | 0.645615229 | 0.999071534 | Tyw3     | Tyw3     | TYW3      | 4.982782381 | 5.039653775 | 5.250977187 | 2.775284262 | 5.886230544 | 9.531843159 | 5.112508185 | 2.417885834 | 3.378452169 | 5.816947841 |
| ENSMUSG000000026707  | -0.180179625 | 2.304248333  | 0.211410014 | 0.645664487 | 0.999071534 | Nsun6    | Nsun6    | NSUN6     | 4.491522147 | 6.284744707 | 6.126140051 | 5.758714844 | 3.727946011 | 4.365729691 | 5.889091707 | 4.283112048 | 3.457020824 | 3.725460977 |
| ENSMUSG000000088948  | 0.860167108  | -1.223341434 | 0.211393379 | 0.645677473 | 0.999071534 | Gm23262  | Gm23262  | SNORD97   | 1.19306057  | 0           | 0           | 0           | 0           | 0           | 0           | 0.621742072 | 1.099961171 | 0           |
| ENSMUSG000000020873  | 0.102181621  | 5.869626631  | 0.211251903 | 0.64578794  | 0.999071534 | Slc35b1  | Slc35b1  | SLC35B1   | 66.39031173 | 48.85499659 | 65.36793395 | 52.66101887 | 59.18931824 | 82.29400468 | 72.15755223 | 36.19920505 | 48.71256616 | 56.47014533 |
| ENSMUSG000000022022  | 0.208035781  | 2.314806395  | 0.211244512 | 0.645793712 | 0.999071534 | Mtrf1    | Mtrf1    | MTRF1     | 7.158363421 | 5.573264174 | 2.221567271 | 4.02416218  | 4.447374189 | 6.257545891 | 9.577863435 | 3.661369977 | 2.278490998 | 3.92153787  |
| ENSMUSG000000050002  | -0.115989544 | 5.164655123  | 0.211037115 | 0.645955735 | 0.999071534 | Idnk     | Idnk     | IDNK      | 61.12680921 | 26.32477972 | 34.7372337  | 36.56437015 | 34.59795508 | 32.59744836 | 36.95243258 | 35.16296827 | 21.99922343 | 39.47681456 |
| ENSMUSG000000024238  | -0.108288294 | 6.329872368  | 0.210837996 | 0.646111383 | 0.999071534 | Zeb1     | Zeb1     | ZE1       | 64.77617096 | 98.18431354 | 95.86399377 | 79.65065832 | 94.04888358 | 96.33710186 | 48.08346306 | 89.73810566 | 69.37612245 | 69.73801513 |
| ENSMUSG000000050931  | -0.112557497 | 5.156049238  | 0.210814835 | 0.646129493 | 0.999071534 | Sgms2    | Sgms2    | SGMS2     | 33.8969562  | 30.35650274 | 35.20847524 | 55.29753892 | 35.2519807  | 42.05652936 | 24.8506727  | 38.13351372 | 27.97044121 | 32.48340536 |
| ENSMUSG000000000346  | -0.121754892 | 8.214156741  | 0.210809155 | 0.646133935 | 0.999071534 | Dazap2   | Dazap2   | DAZAP2    | 231.1028505 | 308.7825513 | 358.4128531 | 349.3389065 | 353.7624557 | 297.306192  | 230.0628683 | 301.6139872 | 233.9774549 | 306.0106718 |
| ENSMUSG000000068101  | 0.169868991  | 3.298729363  | 0.21066569  | 0.646246143 | 0.999071534 | Cenpm    | Cenpm    | CENPM     | 12.00078574 | 5.632554219 | 10.16535327 | 8.742145425 | 10.98763035 | 14.5524323  | 15.66110102 | 5.18118393  | 8.563983406 | 6.470537486 |
| ENSMUSG000000027806  | 0.106545983  | 5.81994515   | 0.210599685 | 0.646297782 | 0.999071534 | Tsc22d2  | Tsc22d2  | TSC22D2   | 45.47666174 | 57.62992316 | 62.8770858  | 52.52225466 | 63.24427706 | 60.10154542 | 41.35307253 | 77.85592385 | 53.34811681 | 46.66630066 |
| ENSMUSG000000024082  | -0.111826124 | 4.553729871  | 0.210523483 | 0.646357412 | 0.999071534 | Ndufaf7  | Ndufaf7  | NDUFAF7   | 29.75633422 | 20.57364541 | 20.73462787 | 27.61407841 | 27.14206306 | 22.48350791 | 24.46238094 | 18.23776743 | 18.93504588 | 23.92138101 |
| ENSMUSG000000033819  | -0.107912016 | 4.92957994   | 0.210196213 | 0.646613658 | 0.999071534 | Ppp1r16a | Ppp1r16a | PPP1R16A  | 37.68667801 | 34.15106558 | 29.48625651 | 26.92025734 | 35.70979863 | 37.18146454 | 20.70889391 | 22.03730231 | 23.80630249 | 38.49643009 |
| ENSMUSG000000002020  | -0.111135074 | 7.101852596  | 0.210176675 | 0.646628963 | 0.999071534 | Ltbp2    | Ltbp2    | LTBP2     | 143.9392488 | 175.7949817 | 143.59403   | 118.7821664 | 160.0400682 | 204.8254847 | 93.38416849 | 120.7561268 | 93.57526822 | 139.6721071 |
| ENSMUSG000000029212  | 0.324792606  | 0.383611146  | 0.21016876  | 0.646635163 | 0.999071534 | Gabrb1   | Gabrb1   | GABRB1    | 0.561440268 | 0.711480533 | 1.481044848 | 2.150845303 | 0.457817931 | 0.800383777 | 0.776583522 | 0.967154334 | 2.514196963 | 0.915025503 |
| ENSMUSG000000029433  | 0.107867599  | 4.950129676  | 0.210105393 | 0.646684811 | 0.999071534 | Diablo   | Diablo   | DIABLO    | 29.96687432 | 30.00076247 | 25.51436351 | 30.04245214 | 38.52210878 | 34.70755105 | 44.26526074 | 26.52766172 | 19.09218319 | 31.56837986 |
| ENSMUSG000000038141  | 0.096778118  | 5.608063727  | 0.209812268 | 0.646914586 | 0.999071534 | Tmem181a | Tmem181a | TMEM181   | 39.79207902 | 49.8036373  | 55.9431031  | 42.3924671  | 56.44241066 | 53.3346644  | 58.24376413 | 50.43019025 | 31.42746204 | 51.50286403 |
| ENSMUSG0000000062110 | -0.150852272 | 3.474281974  | 0.209695757 | 0.647005971 | 0.999071534 | Scfd2    | Scfd2    | SCFD2     | 13.68510654 | 12.62877946 | 8.213066882 | 11.17051915 | 14.45396611 | 15.06176744 | 12.29590576 | 5.872008453 | 6.128355098 | 12.28748533 |
| ENSMUSG000000055762  | -0.11579543  | 8.353476253  | 0.20969415  | 0.647007232 | 0.999071534 | Eef1d    | Eef1d    | EEF1D     | 399.7454711 | 312.1027938 | 398.8723055 | 334.5605178 | 319.8185262 | 359.5906022 | 382.596815  | 260.8553402 | 228.3205117 | 296.8604168 |
| ENSMUSG000000038502  | -0.121129781 | 6.921644657  | 0.209503937 | 0.647156491 | 0.999071534 | Ptov1    | Ptov1    | PTOV1     | 141.1320475 | 101.2081058 | 147.0273612 | 145.7718059 | 117.855416  | 115.5463125 | 64.06814054 | 116.4730147 | 111.7246275 | 145.6197729 |
| ENSMUSG000000029003  | -0.181030948 | 3.419245152  | 0.209332934 | 0.647290747 | 0.999071534 | Mad2l2   | Mad2l2   | MAD2L2    | 11.9306057  | 11.68013875 | 13.66600473 | 8.464616999 | 12.75349951 | 15.4983404  | 12.8783434  | 9.326131073 | 1.728510412 | 10.78422914 |
| ENSMUSG000000033174  | 0.12973147   | 5.026246975  | 0.209225551 | 0.647375087 | 0.999071534 | Mgll     | Mgll     | MGLL      | 20.07148959 | 31.83875385 | 39.98821088 | 31.91576901 | 36.82164218 | 44.89425366 | 17.27898336 | 28.32380548 | 25.06340098 | 50.39176163 |
| ENSMUSG000000017405  | 0.193829438  | 2.568367376  | 0.209043791 | 0.647517905 | 0.999071534 | Nek8     | Nek8     | NEK8      | 7.649623656 | 4.03172302  | 3.971893    | 7.007592761 | 5.363010051 | 5.311637791 | 2.653327033 | 6.424668073 | 6.835472994 | 7.97379367  |
| ENSMUSG000000027263  | 0.099045773  | 5.342458897  | 0.209020402 | 0.647536289 | 0.999071534 | Tubgcp4  | Tubgcp4  | TUBGCP4   | 40.35351929 | 47.37274548 | 38.43984582 | 28.23851737 | 49.44433657 | 59.95602109 | 38.37616903 | 36.40645241 | 29.38467701 | 41.89509625 |
| ENSMUSG000000024604  | 0.101371941  | 5.720273671  | 0.208764761 | 0.647737299 | 0.999071534 | Rbm22    | Rbm22    | RBM22     | 46.81008237 | 40.49510033 | 66.44505748 | 57.1708558  | 51.6026211  | 58.28249138 | 41.54721841 | 55.74953908 | 49.10540944 | 56.66622223 |
| ENSMUSG000000040325  | 0.129563596  | 4.450183186  | 0.208714441 | 0.647776883 | 0.999071534 | Vprbp    | Vprbp    | DCAF1     | 25.05427197 | 27.68845074 | 15.68561134 | 13.46012867 | 26.68424513 | 33.61611862 | 24.91538799 | 25.49142493 | 13.98522061 | 14.31361323 |
| ENSMUSG000000025645  | -0.19385728  | 2.759385088  | 0.208628055 | 0.647844852 | 0.999071534 | Ccdc51   | Ccdc51   | CCDC51    | 10.0357448  | 3.972432975 | 9.492151068 | 6.03624327  | 7.325086899 | 7.057929668 | 7.312828163 | 7.944482025 | 5.421237202 | 2.091486864 |

|                     |              |              |             |             |             |               |               |                |             |             |             |             |             |             |             |             |             |             |
|---------------------|--------------|--------------|-------------|-------------|-------------|---------------|---------------|----------------|-------------|-------------|-------------|-------------|-------------|-------------|-------------|-------------|-------------|-------------|
| ENSMUSG00000030145  | 0.18440405   | 2.456127026  | 0.208464586 | 0.647973516 | 0.999071534 | Zfp248        | Zfp248        | ZNF248         | 3.017741442 | 5.632554219 | 5.587578288 | 6.105625376 | 5.559217736 | 7.057929668 | 6.147952881 | 2.694215643 | 5.264099892 | 6.470537486 |
| ENSMUSG00000021868  | 0.107515324  | 4.606493869  | 0.208336111 | 0.648074681 | 0.999071534 | Ppif          | Ppif          | PPIF           | 24.21211157 | 22.05589652 | 27.60129034 | 25.393851   | 21.58284533 | 33.25230782 | 25.49782563 | 18.7213446  | 19.01361453 | 26.53573959 |
| ENSMUSG00000043091  | 0.159611581  | 8.154604861  | 0.208321618 | 0.648086095 | 0.999071534 | Tuba1c        | Tuba1c        | TUBA1C         | 465.0129022 | 212.1990689 | 263.2220615 | 235.6910159 | 225.3772273 | 466.1144067 | 484.7822635 | 125.1774037 | 184.7934768 | 239.6713228 |
| ENSMUSG00000030016  | 0.091277084  | 5.911928468  | 0.20831718  | 0.648089591 | 0.999071534 | Zfml          | Zfp638        | ZNF638         | 50.03836392 | 58.04495347 | 61.79996227 | 65.49670858 | 65.99118465 | 72.76216152 | 58.50262531 | 56.71669342 | 46.82691844 | 66.53542587 |
| ENSMUSG00000071659  | -0.115328142 | 7.00412069   | 0.208214025 | 0.648170848 | 0.999071534 | Hnrnpul2      | Hnrnpul2      | HNRNPUL2-BSCL2 | 119.5165971 | 154.865596  | 137.7371708 | 101.1591113 | 182.3423417 | 185.8345605 | 81.3471239  | 134.987112  | 88.23259967 | 116.077521  |
| ENSMUSG00000041891  | -0.10529163  | 6.883024223  | 0.208191446 | 0.648188638 | 0.999071534 | Lman1         | Lman1         | LMAN1          | 104.56825   | 161.7432411 | 113.2326106 | 118.4352559 | 136.8875614 | 126.0240638 | 136.5492692 | 115.0222832 | 81.47569534 | 92.87508856 |
| ENSMUSG00000025156  | 0.102635061  | 5.957898437  | 0.208151902 | 0.648219796 | 0.999071534 | Gps1          | Gps1          | GPS1           | 75.30317599 | 55.73264174 | 59.98231632 | 48.42871037 | 72.53144081 | 92.55346946 | 76.94648395 | 46.49249046 | 38.89148427 | 63.59427246 |
| ENSMUSG00000029147  | 0.108405585  | 6.535450527  | 0.208095623 | 0.648264148 | 0.999071534 | Ppm1g         | Ppm1g         | PPM1G          | 113.060034  | 93.61898012 | 92.96922429 | 68.54952127 | 96.7303886  | 166.0432526 | 96.94350963 | 65.97374204 | 73.06884924 | 75.94711675 |
| ENSMUSG00000011263  | 0.266150681  | 1.691433397  | 0.208027805 | 0.648317601 | 0.999071534 | Exoc3l2       | Exoc3l2       | EXOC3L2        | 4.491522147 | 2.371601776 | 4.241173882 | 2.150845303 | 1.373453794 | 7.421740475 | 2.653327033 | 0.414494714 | 3.299883514 | 3.202589261 |
| ENSMUSG00000015755  | 0.114708499  | 7.082614237  | 0.20784999  | 0.648457804 | 0.999071534 | Tab2          | Tab2          | TAB2           | 116.0777755 | 127.9479158 | 141.8437043 | 138.9723594 | 149.3140481 | 137.374961  | 93.96660613 | 164.5544016 | 140.7164613 | 132.4826211 |
| ENSMUSG00000001632  | 0.113601344  | 4.894510158  | 0.207681094 | 0.648591042 | 0.999071534 | Brpf1         | Brpf1         | BRPF1          | 29.19489395 | 25.67258923 | 42.6810197  | 19.98204669 | 30.60839883 | 36.89041589 | 21.48547744 | 29.63637208 | 28.91326508 | 31.37230296 |
| ENSMUSG00000054770  | 0.158192458  | 3.060297614  | 0.207621416 | 0.648638136 | 0.999071534 | Kctd18        | Kctd18        | KCTD18         | 7.368903522 | 7.292675462 | 10.29999371 | 5.064893778 | 10.46440986 | 10.47775126 | 6.795105815 | 8.013564478 | 5.892649132 | 11.11102397 |
| ENSMUSG00000021662  | -0.115317493 | 4.542867468  | 0.20743418  | 0.648785944 | 0.999071534 | Arhgef28      | Arhgef28      | ARHGEF28       | 21.40491023 | 32.60952442 | 21.67711095 | 24.97755836 | 24.39515548 | 35.58069698 | 17.08483748 | 21.41556024 | 14.61376985 | 21.69917622 |
| ENSMUSG00000045005  | -0.184029438 | 2.834444128  | 0.207366316 | 0.648839537 | 0.999071534 | Fzd5          | Fzd5          | FZD5           | 8.211063924 | 5.988294485 | 11.2424768  | 3.677251647 | 9.810384239 | 10.76879991 | 4.724216424 | 7.046410144 | 5.892649132 | 3.725460977 |
| ENSMUSG000000062198 | 0.165804511  | 3.344836265  | 0.207170571 | 0.648994178 | 0.999071534 | 2700097O09Rik | 2700097O09Rik |                | 6.596923153 | 7.114805329 | 8.886269085 | 14.8477708  | 11.18383803 | 7.130691829 | 8.671849326 | 10.0169556  | 11.5495923  | 12.35284429 |
| ENSMUSG00000078684  | 0.232353065  | 3.01248525   | 0.207148614 | 0.64901153  | 0.999071534 | 5830417110Rik | 5830417110Rik |                | 12.562226   | 11.38368853 | 2.558168373 | 4.579219032 | 7.128879214 | 20.08235658 | 11.38989165 | 4.214029596 | 1.885647722 | 7.189486096 |
| ENSMUSG00000029128  | -0.129562223 | 5.042841838  | 0.207125104 | 0.64903011  | 0.999071534 | Rab28         | Rab28         | RAB28          | 43.37126073 | 38.95355918 | 24.5045602  | 29.41801318 | 42.70787272 | 38.27289696 | 52.74296419 | 27.97839322 | 14.45663254 | 21.76453518 |
| ENSMUSG000000021461 | 0.176323529  | 2.60157992   | 0.206928823 | 0.649185285 | 0.999071534 | Fancc         | Fancc         | FANCC          | 6.667103186 | 5.573264174 | 6.597381593 | 5.689332737 | 4.381971627 | 11.86023233 | 5.694945826 | 3.315957715 | 5.028393926 | 5.555511983 |
| ENSMUSG00000023904  | -0.148366577 | 6.295252708  | 0.206898723 | 0.649209088 | 0.999071534 | Hcfc1r1       | Hcfc1r1       | HCFC1R1        | 55.4422265  | 83.48038253 | 94.3156287  | 99.49394079 | 93.3294554  | 37.32698886 | 37.34072434 | 101.1367103 | 72.75457462 | 98.10380572 |
| ENSMUSG000000073468 | 0.128436413  | 5.327051172  | 0.206897328 | 0.649210192 | 0.999071534 | Sft2d1        | Sft2d1        | SFT2D1         | 45.96792197 | 31.89804389 | 36.82416053 | 38.22954071 | 45.84719568 | 52.82532927 | 73.25771222 | 31.15618603 | 17.36367278 | 33.3330719  |
| ENSMUSG00000024247  | 0.203127218  | 2.094643609  | 0.206771241 | 0.649309929 | 0.999071534 | Pkdcc         | Pkdcc         | PKDCC          | 4.140621979 | 5.276813952 | 5.183656966 | 1.942698983 | 3.531738326 | 6.621356699 | 5.889091707 | 3.385040167 | 1.649941757 | 4.64048648  |
| ENSMUSG00000019579  | 0.099145511  | 6.377565528  | 0.206709702 | 0.649358621 | 0.999071534 | D17Wsu104e    | Mydgm         | MYDGF          | 105.4805904 | 77.49208804 | 75.33132656 | 80.41386149 | 77.76364574 | 88.40602625 | 109.821853  | 68.73704013 | 67.64761204 | 80.45688531 |
| ENSMUSG000000062949 | 0.114744579  | 4.812310584  | 0.206661027 | 0.649399714 | 0.999071534 | Atp11c        | Atp11c        | ATP11C         | 26.10697248 | 29.58573216 | 28.07253188 | 21.02277828 | 35.18657814 | 43.65729691 | 32.42236203 | 24.6624355  | 24.98483232 | 16.79725388 |
| ENSMUSG00000034940  | -0.136364736 | 4.223698386  | 0.206626357 | 0.64942458  | 0.999071534 | Synrg         | Synrg         | SYNRG          | 16.91338808 | 23.06382727 | 12.85816209 | 20.81463196 | 27.27286819 | 23.50217817 | 8.865959507 | 18.23776743 | 14.45663254 | 20.98022761 |
| ENSMUSG000000087371 | 0.279485927  | 1.291760142  | 0.206605143 | 0.649441371 | 0.999071534 | Gm15541       | Gm15541       |                | 2.596661241 | 1.48225111  | 2.423527932 | 3.330341114 | 0.981038424 | 0.873145938 | 0.841298815 | 2.417885834 | 4.399844685 | 2.941153403 |
| ENSMUSG000000005936 | -0.114835584 | 5.538755611  | 0.206588213 | 0.649454772 | 0.999071534 | Kctd20        | Kctd20        | KCTD20         | 61.47770938 | 66.16768956 | 40.12285132 | 32.19329744 | 51.99503647 | 74.87226421 | 50.9565126  | 30.39627905 | 26.55620542 | 39.99968628 |
| ENSMUSG00000002222  | -0.112023031 | 5.001600456  | 0.206575541 | 0.649464804 | 0.999071534 | Rmnd5a        | Rmnd5a        | RMND5A         | 29.26507399 | 37.23414789 | 29.14965541 | 42.46184921 | 33.15909873 | 48.16855093 | 18.8968657  | 31.43251584 | 24.59198905 | 27.71220095 |
| ENSMUSG000000042677 | 0.158190554  | 3.004986074  | 0.206546831 | 0.649487532 | 0.999071534 | Zc3h12a       | Zc3h12a       | ZC3H12A        | 9.263764428 | 8.241316173 | 7.337904017 | 8.256470679 | 5.559217736 | 8.876983706 | 6.018522294 | 9.602460883 | 8.406846095 | 6.862691273 |
| ENSMUSG000000064181 | -0.103014606 | 4.69971839   | 0.206398253 | 0.649605184 | 0.999071534 | Rab3lp        | Rab3lp        | AC025263.3     | 27.65093322 | 25.02039874 | 24.5045602  | 29.90368792 | 31.78564494 | 34.27097808 | 22.06791508 | 22.72812684 | 21.29210553 | 21.1763045  |
| ENSMUSG00000095990  | -0.325599649 | 2.625654281  | 0.20635763  | 0.64963736  | 0.999071534 | Zfp97         | Zfp97         | ZNF788         | 1.19306057  | 10.49433786 | 7.943786    | 7.423885401 | 7.652099707 | 6.912405345 | 9.966155196 | 4.075864691 | 5.028393926 | 0           |
| ENSMUSG000000082901 | -0.372813987 | -0.340310509 | 0.206163894 | 0.649790865 | 0.999071534 | Gm14323       | Gm14323       |                | 0.561440268 | 1.245090933 | 0.134640441 | 1.110113705 | 0.784830739 | 0.509335131 | 0.129430587 | 0.621742072 | 0.942823861 | 0.457512752 |
| ENSMUSG000000031077 | -0.176106526 | 3.1160354    | 0.206114719 | 0.649829842 | 0.999071534 | Fadd          | Fadd          | FADD           | 13.89564664 | 8.122736084 | 7.943786    | 6.938210655 | 10.39900729 | 16.29872418 | 9.124856381 | 4.214029596 | 3.614158135 | 7.646998847 |
| ENSMUSG000000021555 | 0.091787013  | 5.558205324  | 0.206104821 | 0.649837688 | 0.999071534 | Naa35         | Naa35         | NAA35          | 48.07332298 | 40.67297046 | 46.18167115 | 50.30202725 | 50.62158268 | 53.77123736 | 40.77063489 | 50.77560251 | 38.97005293 | 49.99960785 |
| ENSMUSG000000026687 | 0.1055456    | 5.741291143  | 0.206023637 | 0.649902051 | 0.999071534 | Aldh9a1       | Aldh9a1       | ALDH9A1        | 48.98566341 | 68.8950316  | 42.61369948 | 44.4739303  | 62.85186169 | 77.3461777  | 70.86324636 | 51.39734458 | 30.17036356 | 44.50945483 |
| ENSMUSG000000042182 | 0.160850279  | 2.930182451  | 0.20597793  | 0.649938294 | 0.999071534 | Bend6         | Bend6         | BEND6          | 5.684582717 | 7.351965506 | 7.80914556  | 6.313771696 | 9.614176555 | 5.675448599 | 8.9307105   | 8.497141644 | 6.599767028 | 7.908434705 |
| ENSMUSG000000025330 | 0.542581778  | -0.592023914 | 0.205889586 | 0.65000836  | 0.999071534 | Padi4         | Padi4         | PADI4          | 0.140360067 | 0.5336104   | 0.403921322 | 0           | 1.24264867  | 0.800383777 | 0           | 0.898071881 | 1.257098482 | 0           |
| ENSMUSG00000019235  | -0.386156228 | -0.067581398 | 0.205883378 | 0.650013284 | 0.999071534 | Rps6kl1       | Rps6kl1       | RPS6KL1        | 0.912340436 | 0           | 0.471241542 | 2.150845303 | 1.24264867  | 0.727621615 | 0.517722348 | 0.828989429 | 0.628549241 | 0.71894861  |
| ENSMUSG00000022307  | -0.104984538 | 5.680907824  | 0.205828877 | 0.650056518 | 0.999071534 | Oxr1          | Oxr1          | OXR1           | 53.82808573 | 64.15182805 | 36.62219987 | 56.1301242  | 64.81393854 | 62.93926972 | 64.32700172 | 46.21616065 | 31.74173666 | 36.92781495 |
| ENSMUSG000000001366 | -0.133160261 | 4.344800986  | 0.205802033 | 0.650077816 | 0.999071534 | Fbxo9         | Fbxo9         | FBXO9          | 35.58127701 | 24.48678834 | 15.48365068 | 19.42698983 | 14.97718661 | 27.28581057 | 24.07408917 | 12.64208879 | 12.96382809 | 18.10443317 |

|                     |              |              |             |             |             |               |          |            |             |             |             |             |             |             |             |             |             |             |
|---------------------|--------------|--------------|-------------|-------------|-------------|---------------|----------|------------|-------------|-------------|-------------|-------------|-------------|-------------|-------------|-------------|-------------|-------------|
| ENSMUSG00000062312  | 0.095719336  | 5.324756972  | 0.205798458 | 0.650080652 | 0.999071534 | Erbp2         | Erbp2    | ERBP2      | 36.49361744 | 36.87840762 | 39.58428956 | 43.91887345 | 43.16569065 | 41.54719423 | 36.95243258 | 37.09727694 | 37.63438579 | 44.57481379 |
| ENSMUSG00000001755  | -0.116395117 | 4.894177141  | 0.205744592 | 0.650123394 | 0.999071534 | Coasy         | Coasy    | COASY      | 44.3537812  | 24.54607838 | 24.23527932 | 28.79357422 | 38.58751134 | 34.63478888 | 35.65812671 | 21.13923043 | 15.94943698 | 32.54876432 |
| ENSMUSG00000028869  | 0.092716298  | 5.457794028  | 0.205712739 | 0.650148671 | 0.999071534 | Gnl2          | Gnl2     | GNL2       | 41.12549966 | 43.04457224 | 53.31761451 | 37.81324807 | 45.06236494 | 54.86266979 | 39.47632902 | 43.79827482 | 36.61299348 | 44.77089069 |
| ENSMUSG00000040250  | 0.101483468  | 4.938158917  | 0.205615269 | 0.650226036 | 0.999071534 | Asun          | Asun     | ASUN       | 32.35299546 | 23.65672772 | 28.4764532  | 32.95650061 | 35.31738326 | 39.80090235 | 32.29293145 | 23.14262155 | 26.71334273 | 31.69909778 |
| ENSMUSG00000032578  | -0.300305953 | 1.33012542   | 0.205439754 | 0.650365403 | 0.999071534 | Cish          | Cish     | CISH       | 4.140621979 | 5.573264174 | 1.009803305 | 1.457024238 | 1.504258917 | 6.112021568 | 1.035444696 | 2.694215643 | 0.392843275 | 0.980384468 |
| ENSMUSG00000024327  | -0.121620156 | 7.106441145  | 0.205413355 | 0.650386216 | 0.999071534 | Slc39a7       | Slc39a7  | SLC39A7    | 180.2223261 | 175.9728518 | 138.0064517 | 117.5332885 | 135.7103153 | 213.8479927 | 165.9300125 | 86.21490059 | 67.56904338 | 128.3650063 |
| ENSMUSG00000022221  | 0.182061007  | 3.073549491  | 0.205310574 | 0.650468024 | 0.999071534 | Ripk3         | Ripk3    | RIPK3      | 10.8779052  | 10.07930755 | 3.971893    | 7.63203172  | 7.848307392 | 16.66253499 | 9.642578728 | 5.733843549 | 3.221314859 | 9.607767782 |
| ENSMUSG00000018286  | 0.128048142  | 7.961069857  | 0.205302656 | 0.650474315 | 0.999071534 | Psmb6         | Psmb6    | PSMB6      | 288.0188577 | 177.632973  | 260.5292527 | 284.536019  | 220.7336454 | 209.2639765 | 312.1865757 | 205.5893783 | 269.6476243 | 233.1354264 |
| ENSMUSG00000020457  | 0.10900909   | 6.867729928  | 0.205278804 | 0.650493268 | 0.999071534 | Drg1          | Drg1     | DRG1       | 123.1659589 | 113.0068246 | 125.2156098 | 103.4487209 | 118.6402467 | 128.7162637 | 179.9085159 | 91.87966168 | 92.47530705 | 94.11690889 |
| ENSMUSG000000082491 | 0.333675948  | 0.565197036  | 0.205229924 | 0.650532112 | 0.999071534 | Gm5909        | Gm5909   |            | 0.140360067 | 2.54947191  | 2.154247051 | 0.277528426 | 1.046440986 | 1.673529715 | 2.394465859 | 1.036236786 | 0.471411931 | 1.830051006 |
| ENSMUSG00000046323  | 0.343667789  | -0.121858694 | 0.205196072 | 0.650559016 | 0.999071534 | Dppa3         | Dppa3    | DPPA3      | 0.280720134 | 0.592900444 | 1.211763966 | 1.179495811 | 0.261610246 | 1.018670261 | 1.48845175  | 0.690824524 | 0.235705965 | 0.915025503 |
| ENSMUSG00000026484  | 0.103049282  | 6.283824409  | 0.205003449 | 0.650712161 | 0.999071534 | Rnf2          | Rnf2     | RNF2       | 71.44327415 | 81.70168119 | 64.49277109 | 79.16498357 | 92.61002722 | 68.25090751 | 88.53052148 | 90.56709509 | 72.67000597 | 63.33283661 |
| ENSMUSG00000020937  | -0.124549436 | 4.5117792    | 0.204972091 | 0.6507371   | 0.999071534 | Plcd3         | Plcd3    | PLCD3      | 25.89643238 | 26.26548967 | 23.831358   | 22.89609516 | 23.93733754 | 17.24463228 | 13.33135046 | 25.49142493 | 25.06340098 | 20.52271485 |
| ENSMUSG00000020570  | -0.098262146 | 6.807372644  | 0.204806144 | 0.650869116 | 0.999071534 | Sypl          | Sypl     | SYPL1      | 110.2528327 | 117.6907381 | 108.5875154 | 128.911954  | 134.3368615 | 122.3859557 | 125.8712458 | 96.43910354 | 76.2901641  | 105.2279329 |
| ENSMUSG000000085748 | 0.441595852  | -0.681458269 | 0.204775106 | 0.650893815 | 0.999071534 | Gm12280       | Gm12280  |            | 0.491260235 | 0.118580089 | 1.279084186 | 0.138764213 | 0.130805123 | 0.218286485 | 0.19414588  | 0.898071881 | 0.15713731  | 1.241820326 |
| ENSMUSG000000098371 | 0.521830349  | 0.621149452  | 0.204702499 | 0.650951602 | 0.999071534 | RP24-288C12.6 | Gm28037  |            | 3.509001677 | 1.897281421 | 0.673202203 | 0           | 0           | 0.727621615 | 0.711868228 | 5.872008453 | 0           | 0.653589645 |
| ENSMUSG000000079162 | 0.374416333  | 0.107329554  | 0.204672996 | 0.650975087 | 0.999071534 | Trim43b       | Trim43b  | TRIM43     | 1.122880537 | 0.948640711 | 1.481044848 | 0.693821065 | 0           | 0.800383777 | 0.582437641 | 0.828989429 | 0.471411931 | 2.483640651 |
| ENSMUSG00000028996  | 0.45952585   | 0.217363907  | 0.204671983 | 0.650975893 | 0.999071534 | Rbp7          | Rbp7     | RBP7       | 1.473780704 | 0           | 1.279084186 | 0.485674746 | 1.24264867  | 3.710870238 | 2.265035272 | 0.069082452 | 0.078568655 | 0.261435858 |
| ENSMUSG00000030579  | -0.12910763  | 6.717769855  | 0.204560529 | 0.65106463  | 0.999071534 | Tyrobp        | Tyrobp   | TYROBP     | 171.3796419 | 99.37011443 | 82.33262948 | 108.5136146 | 109.941706  | 106.5238045 | 164.5709913 | 83.86609721 | 45.01983937 | 94.8358575  |
| ENSMUSG000000079003 | 0.099180378  | 5.150150256  | 0.204240489 | 0.651319599 | 0.999071534 | Samd1         | Samd1    | SAMD1      | 35.23037684 | 39.19071935 | 32.65030687 | 28.44666369 | 42.44626248 | 47.73197796 | 28.08643737 | 40.27506975 | 30.24893221 | 31.56837986 |
| ENSMUSG000000097358 | -0.379784622 | -0.324125259 | 0.204148949 | 0.651392572 | 0.999071534 | Gm26773       | Gm26773  |            | 0.491260235 | 1.126510844 | 1.144443746 | 0.20814632  | 0.915635862 | 0.800383777 | 0.906014109 | 0.828989429 | 0           | 0.326794823 |
| ENSMUSG000000066151 | -0.105430557 | 4.874932893  | 0.204050232 | 0.651471288 | 0.999071534 | Fkbp15        | Fkbp15   | FKBP15     | 40.91495955 | 33.20242487 | 29.28429585 | 25.60199732 | 28.71172454 | 45.33082663 | 24.33295035 | 23.41895136 | 19.2493205  | 27.32004716 |
| ENSMUSG000000007892 | -0.121587904 | 9.97072938   | 0.203699179 | 0.651751399 | 0.999071534 | Rplp1         | Rplp1    |            | 1172.848721 | 814.8230803 | 1211.562005 | 1329.291779 | 870.3118872 | 929.9731864 | 996.3566584 | 851.3721433 | 853.9627123 | 973.3910584 |
| ENSMUSG000000045302 | -0.097310504 | 5.915544957  | 0.203508642 | 0.651903553 | 0.999071534 | Preb          | Preb     | PREB       | 85.68982095 | 67.17562031 | 56.34702443 | 53.42422204 | 61.74001815 | 83.82201007 | 58.17904884 | 43.03836784 | 38.81291562 | 63.65963143 |
| ENSMUSG000000058152 | -0.313609849 | 0.735138304  | 0.203354173 | 0.652026968 | 0.999071534 | Chsy3         | Chsy3    | CHSY3      | 3.579181711 | 3.083082309 | 0.336601102 | 0.346910533 | 1.569661478 | 1.600767553 | 1.876743511 | 1.72706131  | 0.785686551 | 0.653589645 |
| ENSMUSG000000048482 | 0.126276805  | 4.810038754  | 0.203305801 | 0.652065627 | 0.999071534 | Bdnf          | Bdnf     | BDNF       | 19.86094949 | 18.73565403 | 35.88167744 | 29.76492371 | 33.94392947 | 21.97417278 | 25.04481858 | 34.19581393 | 30.01322625 | 25.94750891 |
| ENSMUSG000000089989 | -0.177838867 | 2.520216045  | 0.20327436  | 0.652090758 | 0.999071534 | Flt3l         | Flt3l    | RPL13A     | 8.281243958 | 3.616692709 | 6.126140051 | 6.452535909 | 6.409451036 | 5.166113468 | 4.853647011 | 5.802926001 | 2.671334273 | 7.124127131 |
| ENSMUSG000000013921 | 0.359319481  | -0.089640522 | 0.203140382 | 0.652197872 | 0.999071534 | Clip3         | Clip3    | CLIP3      | 0.842160403 | 1.185800888 | 0.875162864 | 0.346910533 | 0.39241537  | 1.236956746 | 1.164875283 | 0.828989429 | 0           | 1.30717929  |
| ENSMUSG000000097347 | 0.223630246  | 2.302078671  | 0.203110691 | 0.652221616 | 0.999071534 | Gm17275       | Gm17275  |            | 3.649361744 | 6.699775018 | 5.116336746 | 2.775284262 | 4.839789558 | 2.255627007 | 2.9769035   | 9.671543335 | 2.278490998 | 7.450921954 |
| ENSMUSG000000035885 | 0.110999436  | 7.300067971  | 0.203085738 | 0.652241572 | 0.999071534 | Cox8a         | Cox8a    | COX8A      | 141.9742079 | 145.8535092 | 154.0959844 | 149.6572038 | 195.1612438 | 144.3601285 | 201.329278  | 162.5510105 | 111.7246275 | 169.1490001 |
| ENSMUSG000000034295 | -0.172089288 | 4.086108353  | 0.203058285 | 0.652263529 | 0.999071534 | Fhod3         | Fhod3    | FHOD3      | 24.84373187 | 25.13897883 | 11.78103856 | 11.58681179 | 20.07858641 | 28.66829164 | 27.11570797 | 10.56961522 | 6.835472994 | 7.189486096 |
| ENSMUSG000000028256 | 0.117163633  | 4.614304399  | 0.203033205 | 0.65228359  | 0.999071534 | Odf2l         | Odf2l    | ODF2L      | 21.26455016 | 22.11518656 | 24.77384109 | 24.42250151 | 28.64632198 | 19.20921064 | 22.19734566 | 29.01463001 | 26.79191139 | 22.05297104 |
| ENSMUSG000000028563 | 0.13626032   | 4.862914416  | 0.202916818 | 0.652376705 | 0.999071534 | Tm2d1         | Tm2d1    | TM2D1      | 33.12497583 | 28.63709145 | 16.89737531 | 35.59302066 | 28.64632198 | 24.0115133  | 54.5549924  | 24.80060041 | 18.14935933 | 25.29391926 |
| ENSMUSG000000036826 | -0.263998466 | 1.097341959  | 0.202889993 | 0.652398171 | 0.999071534 | Igflr1        | Igflr1   | IGFLR1     | 3.087921476 | 1.778701332 | 1.548365068 | 3.330341114 | 1.569661478 | 2.910486461 | 0.453007054 | 1.312566595 | 2.749902928 | 1.30717929  |
| ENSMUSG000000060143 | 0.188201759  | 2.883918985  | 0.20253309  | 0.652683931 | 0.999071534 | Gm10076       | Gm10076  | AC090498.1 | 9.614664595 | 6.284744707 | 8.280387102 | 5.411804311 | 5.690022859 | 8.14936209  | 15.59638573 | 4.075864691 | 3.614158135 | 6.601255415 |
| ENSMUSG000000032842 | 0.188771864  | 2.740048697  | 0.20238045  | 0.652806237 | 0.999071534 | Abcc10        | Abcc10   | ABCC10     | 4.982782381 | 4.03172302  | 8.347707322 | 6.452535909 | 7.913709953 | 7.130691829 | 3.365195261 | 9.187966168 | 3.535589479 | 10.78422914 |
| ENSMUSG000000086392 | 0.468908637  | -0.360327231 | 0.202373878 | 0.652811505 | 0.999071534 | A330050B17Rik | Mcccl1os |            | 0           | 1.185800888 | 0.06732022  | 0.555056852 | 1.046440986 | 1.164194584 | 0.064715293 | 0.207247357 | 1.649941757 | 0.457512752 |
| ENSMUSG000000025608 | -0.181694468 | 4.163885782  | 0.202347208 | 0.652832881 | 0.999071534 | Podxl         | Podxl    | PODXL      | 27.79129328 | 21.40370603 | 17.03201575 | 13.32136446 | 19.22835311 | 43.58453475 | 18.37914335 | 4.490359406 | 8.32827744  | 12.1567674  |
| ENSMUSG000000094076 | 0.214386139  | 2.481038433  | 0.202327082 | 0.652849013 | 0.999071534 | Gm4767        | Gm4767   | ZNF788     | 6.175842952 | 0.948640711 | 6.462741153 | 5.550568524 | 7.063476652 | 6.839643183 | 7.377543457 | 6.217420715 | 4.635550651 | 3.33330719  |

|                    |              |              |             |             |             |               |               |          |  |  |             |             |             |             |             |             |             |             |             |             |
|--------------------|--------------|--------------|-------------|-------------|-------------|---------------|---------------|----------|--|--|-------------|-------------|-------------|-------------|-------------|-------------|-------------|-------------|-------------|-------------|
| ENSMUSG00000066543 | -0.341356862 | 7.545171065  | 0.202252317 | 0.65290895  | 0.999071534 | Gm10166       | Rpl17-ps9     |          |  |  | 319.7402328 | 249.5517969 | 139.6894572 | 193.9923699 | 183.3887827 | 129.2255989 | 331.7305944 | 223.1363212 | 0.078568655 | 135.0969796 |
| ENSMUSG00000090086 | -0.189925878 | 2.286538333  | 0.202182196 | 0.652965176 | 0.999071534 | Al480526      | Al480526      |          |  |  | 4.210802013 | 4.861783641 | 6.395420932 | 5.481186417 | 5.232204928 | 3.274297269 | 2.78275762  | 6.700997882 | 2.671334273 | 5.816947841 |
| ENSMUSG00000031684 | 0.108128525  | 4.438128289  | 0.202144607 | 0.652995322 | 0.999071534 | Sk10a7        | Sk10a7        | SLC10A7  |  |  | 16.35194782 | 21.52228612 | 21.07122897 | 24.21435519 | 24.19894779 | 28.95934029 | 23.23279036 | 18.92859196 | 18.14935933 | 19.67304832 |
| ENSMUSG00000026799 | 0.153136563  | 3.242558626  | 0.202045253 | 0.653075017 | 0.999071534 | Med27         | Med27         | MED27    |  |  | 8.983044293 | 9.01208675  | 9.492151068 | 7.84017804  | 10.66061754 | 17.0263458  | 12.49005164 | 6.217420715 | 5.185531236 | 8.496665386 |
| ENSMUSG00000022332 | -0.109987914 | 6.386052188  | 0.201939015 | 0.65316026  | 0.999071534 | Khdrbs3       | Khdrbs3       | KHDRBS3  |  |  | 75.30317599 | 71.50379355 | 98.89340368 | 110.6644599 | 91.30197599 | 95.24566943 | 92.15457791 | 45.24900632 | 74.79735965 | 80.84903909 |
| ENSMUSG00000034194 | -0.105541744 | 5.431359269  | 0.201931698 | 0.653166132 | 0.999071534 | R3hcc1        | R3hcc1        | R3HCC1   |  |  | 41.19567969 | 51.81949881 | 55.40454134 | 29.97307003 | 54.28412612 | 48.9689347  | 47.75988659 | 44.62726425 | 22.23492939 | 40.06504524 |
| ENSMUSG00000080746 | -0.277273055 | 0.635049883  | 0.201872434 | 0.653213697 | 0.999071534 | Rpsa-ps12     | Rpsa-ps12     |          |  |  | 0.912340436 | 1.007930755 | 2.692808814 | 1.526406344 | 1.896674286 | 1.600767553 | 2.394465859 | 1.174401691 | 0.392843275 | 0.784307574 |
| ENSMUSG00000055413 | -0.238007497 | 2.424204155  | 0.201847649 | 0.653233592 | 0.999071534 | H2-Q5         | H2-Q5         |          |  |  | 3.228281543 | 10.13859759 | 7.270583797 | 2.705902155 | 6.213243352 | 3.565345915 | 1.48845175  | 10.70778012 | 2.671334273 | 4.509768551 |
| ENSMUSG00000025780 | -0.331883014 | 0.531175049  | 0.201818403 | 0.65325707  | 0.999071534 | Itih5         | Itih5         | ITIHS    |  |  | 1.473780704 | 2.430891821 | 1.817645949 | 1.665170557 | 0.130805123 | 2.910486461 | 0.970729402 | 0.207247357 | 1.021392516 | 0.784307574 |
| ENSMUSG00000022555 | 0.123837172  | 4.662520087  | 0.201493384 | 0.65351812  | 0.999071534 | Dgat1         | Dgat1         | DGAT1    |  |  | 27.93165335 | 30.11934256 | 20.33070654 | 21.71659935 | 25.3761939  | 18.11777822 | 19.60873392 | 24.59335305 | 22.70634132 | 39.60753249 |
| ENSMUSG00000075391 | -0.420085218 | 2.363125566  | 0.20139225  | 0.653599401 | 0.999071534 | Gm13443       | Gm13443       |          |  |  | 8.561964092 | 12.45090933 | 2.490848153 | 0.624438959 | 6.017035667 | 12.2968053  | 9.836724609 | 0.138164905 | 0           | 0.784307574 |
| ENSMUSG00000033419 | 0.45410871   | -0.409725927 | 0.2013832   | 0.653606676 | 0.999071534 | Snap91        | Snap91        | SNAP91   |  |  | 0.561440268 | 0.5336104   | 1.077123525 | 0.20814632  | 0.39241537  | 0.072762162 | 0           | 0.27632981  | 1.335667137 | 1.568615148 |
| ENSMUSG00000001962 | -0.122655618 | 6.426930234  | 0.201319001 | 0.653658287 | 0.999071534 | Fam50a        | Fam50a        | FAM50A   |  |  | 75.44353606 | 103.8761578 | 97.54699928 | 73.61441505 | 115.8933391 | 59.30116164 | 58.63205589 | 127.4571247 | 55.4694705  | 91.82934513 |
| ENSMUSG00000021987 | 0.125546237  | 6.421960316  | 0.201275356 | 0.653693379 | 0.999071534 | Mtmr6         | Mtmr6         | MTMR6    |  |  | 101.0592483 | 111.9988939 | 50.35552482 | 65.08041594 | 99.15028338 | 102.9584586 | 135.3196787 | 92.98498092 | 48.71256616 | 58.82306805 |
| ENSMUSG00000064326 | 0.11500579   | 5.409397948  | 0.2012734   | 0.653694952 | 0.999071534 | Siva1         | Siva1         | SIVA1    |  |  | 62.17950972 | 27.62916069 | 44.70062631 | 41.76802814 | 34.92496789 | 54.20781033 | 54.42556182 | 27.21848624 | 38.73434696 | 39.28073767 |
| ENSMUSG00000027805 | -0.140534914 | 3.312264239  | 0.201152245 | 0.65379239  | 0.999071534 | Pfn2          | Pfn2          | PFN2     |  |  | 11.7200656  | 11.26510844 | 12.05031944 | 10.19916966 | 8.044515076 | 9.604605321 | 10.09558578 | 7.529987311 | 9.271101302 | 8.104511599 |
| ENSMUSG00000025135 | -0.11022218  | 6.165478163  | 0.201151914 | 0.653792657 | 0.999071534 | Anapc11       | Anapc11       | ANAPC11  |  |  | 96.98880635 | 51.46375855 | 73.71564127 | 91.79252696 | 70.96177933 | 77.3461777  | 92.86644614 | 46.97606763 | 49.57682137 | 69.01906652 |
| ENSMUSG00000002379 | 0.124605313  | 6.73005345   | 0.201018193 | 0.653900243 | 0.999071534 | Ndufa11       | Ndufa11       | NDUFA11  |  |  | 131.2366627 | 57.92637339 | 118.9548293 | 126.6223445 | 89.60150939 | 77.63722634 | 127.5538434 | 98.2352473  | 103.0820755 | 116.8618285 |
| ENSMUSG00000033352 | 0.098300788  | 5.718821806  | 0.20095073  | 0.653954536 | 0.999071534 | Map2k4        | Map2k4        | MAP2K4   |  |  | 47.79260284 | 52.53097934 | 60.52087809 | 44.19640187 | 58.79690287 | 55.66305356 | 37.79373139 | 60.03265113 | 51.93388102 | 54.05186365 |
| ENSMUSG00000028898 | -0.109039197 | 5.005236832  | 0.200824517 | 0.654056141 | 0.999071534 | Trnau1ap      | Trnau1ap      | TRNAU1AP |  |  | 41.47639982 | 34.38822576 | 34.80455392 | 28.23851737 | 33.94392947 | 43.00243746 | 40.96478077 | 18.23776743 | 19.09218319 | 31.04550814 |
| ENSMUSG00000089998 | 0.341305812  | -0.072967868 | 0.200793098 | 0.65408144  | 0.999071534 | Al30049Al1Rik | Phtf1os       |          |  |  | 0.280720134 | 0.770770577 | 0.471241542 | 1.248877918 | 0.915635862 | 0.727621615 | 0.647152935 | 0.690824524 | 0.235705965 | 2.156845829 |
| ENSMUSG00000071847 | -0.25510514  | 3.923378006  | 0.200674401 | 0.654177039 | 0.999071534 | Apcdd1        | Apcdd1        | APCDD1   |  |  | 20.77328993 | 26.73981003 | 8.145746661 | 12.90507182 | 16.80845833 | 41.54719423 | 21.09718567 | 4.973936572 | 1.178529826 | 5.163358196 |
| ENSMUSG00000040446 | -0.110030744 | 5.131270969  | 0.200514316 | 0.654306024 | 0.999071534 | Rprd1a        | Rprd1a        | RPRD1A   |  |  | 41.26585972 | 40.43581029 | 36.15095832 | 37.39695543 | 32.83208592 | 37.83632399 | 51.83695008 | 28.46197039 | 23.41345922 | 22.15668897 |
| ENSMUSG00000049760 | 0.122181227  | 5.716467439  | 0.200501112 | 0.654316667 | 0.999071534 | 2410015M20Rik | 2410015M20Rik | C19orf70 |  |  | 73.33813505 | 48.49925632 | 33.86207083 | 49.26129565 | 56.57321578 | 41.40166991 | 90.3425497  | 48.97945875 | 36.77013059 | 45.55519826 |
| ENSMUSG00000090553 | 0.136792302  | 7.699208131  | 0.200472276 | 0.654339908 | 0.999071534 | Snrpe         | Snrpe         | SNRPE    |  |  | 250.9637999 | 118.6986689 | 227.003783  | 267.606785  | 156.2467197 | 160.1495175 | 255.4312634 | 168.5611838 | 215.7495269 | 228.4295809 |
| ENSMUSG00000021737 | 0.122200463  | 7.110005875  | 0.200422184 | 0.654380287 | 0.999071534 | Psmc6         | Psmc6         | PSMD6    |  |  | 180.8539464 | 107.7300107 | 142.5842267 | 123.0144749 | 133.1596154 | 162.2596202 | 226.5035272 | 89.25452849 | 107.3247829 | 115.4892903 |
| ENSMUSG00000074500 | 0.465216971  | -0.477777991 | 0.200401751 | 0.654396759 | 0.999071534 | Zfp558        | Zfp558        | ZNF558   |  |  | 0.98252047  | 1.126510844 | 0           | 0.346910533 | 0.065402562 | 1.091432423 | 0.517722348 | 0.759906976 | 0           | 1.045743432 |
| ENSMUSG00000002109 | -0.215455046 | 1.67862525   | 0.200390705 | 0.654405665 | 0.999071534 | Ddb2          | Ddb2          | DOB2     |  |  | 3.719541778 | 4.565333419 | 3.164050356 | 3.469105327 | 2.158284533 | 2.619437815 | 1.164875283 | 3.108710358 | 3.142746204 | 3.398666154 |
| ENSMUSG00000037110 | -0.163276271 | 2.74756141   | 0.200264033 | 0.654507811 | 0.999071534 | Ralgapa2      | Ralgapa2      | RALGAPA2 |  |  | 5.263502516 | 8.300606217 | 7.405224238 | 6.938210655 | 8.175320199 | 8.14936209  | 4.400639957 | 7.253657501 | 3.378452169 | 7.385562989 |
| ENSMUSG00000053119 | 0.097349568  | 6.4262169    | 0.20024109  | 0.654526316 | 0.999071534 | Chmp3         | Chmp3         | CHMP3    |  |  | 90.3918832  | 102.5717768 | 76.61041075 | 77.70795933 | 84.10769421 | 105.5051342 | 114.9343612 | 69.70419447 | 63.87631659 | 79.28042394 |
| ENSMUSG00000034075 | -0.09478119  | 5.94455378   | 0.200238753 | 0.654528201 | 0.999071534 | Zdhhc5        | Zdhhc5        | ZDHHCS   |  |  | 62.39004982 | 78.55930884 | 67.58950122 | 52.86916519 | 68.99970248 | 86.29592357 | 65.36244641 | 51.12101477 | 42.81991703 | 47.18917237 |
| ENSMUSG00000025742 | 0.094504464  | 5.952075792  | 0.200232848 | 0.654532964 | 0.999071534 | Prps2         | Prps2         | PRPS2    |  |  | 54.03862583 | 54.72471099 | 63.28100712 | 60.57057902 | 77.63284061 | 73.19873449 | 59.60278529 | 54.7133023  | 61.44068829 | 57.77732462 |
| ENSMUSG00000036975 | 0.200895985  | 2.275627582  | 0.200225025 | 0.654539274 | 0.999071534 | Tmem177       | Tmem177       | TMEM177  |  |  | 4.491522147 | 3.794562842 | 6.799342255 | 1.942698983 | 5.886230544 | 7.712789121 | 6.083237587 | 5.733843549 | 1.728510412 | 3.986896835 |
| ENSMUSG00000015354 | 0.186678967  | 2.905474166  | 0.200169295 | 0.65458423  | 0.999071534 | Pcolce2       | Pcolce2       | PCOLCE2  |  |  | 8.140883891 | 7.233385418 | 3.635291898 | 9.64411281  | 6.932671529 | 7.567264798 | 15.07866338 | 6.217420715 | 4.242707375 | 5.163358196 |
| ENSMUSG00000038646 | 0.106912178  | 5.058641124  | 0.200102019 | 0.654638512 | 0.999071534 | Fam103a1      | Fam103a1      | FAM103A1 |  |  | 25.05427197 | 26.68051998 | 40.79605353 | 38.78459756 | 33.81312435 | 33.90716727 | 29.12188207 | 29.98178434 | 32.92026649 | 38.56178906 |
| ENSMUSG00000027654 | 0.157812072  | 3.725424663  | 0.200081161 | 0.654655343 | 0.999071534 | Fam83d        | Fam83d        | FAM83D   |  |  | 18.24680872 | 6.225454663 | 14.00260583 | 12.6969255  | 13.14591488 | 20.95550252 | 15.66110102 | 5.595678644 | 11.86386692 | 13.85610048 |
| ENSMUSG00000003809 | 0.123081312  | 3.968572244  | 0.200055067 | 0.654676402 | 0.999071534 | Gcdh          | Gcdh          | GCDH     |  |  | 16.77302802 | 16.83837261 | 15.34901024 | 9.574730704 | 19.09754799 | 15.71662689 | 15.40223985 | 16.16529386 | 14.37806388 | 15.88222837 |
| ENSMUSG00000054065 | -0.162003786 | 3.22912104   | 0.199922163 | 0.654783681 | 0.999071534 | Pkp3          | Pkp3          | PKP3     |  |  | 12.91312617 | 10.85007813 | 5.520258068 | 10.40731598 | 11.05303291 | 6.69411886  | 6.859821109 | 13.12566595 | 6.599767028 | 8.300588492 |
| ENSMUSG00000030870 | -0.098256223 | 5.791203604  | 0.199536054 | 0.655095591 | 0.999071534 | Ubfd1         | Ubfd1         | UBFD1    |  |  | 57.3370874  | 52.82742957 | 56.75094575 | 69.65963498 | 58.927708   | 78.14656147 | 51.96638066 | 38.40984353 | 50.12680195 | 41.63366039 |

|                     |              |              |             |             |             |          |          |             |             |             |             |             |             |             |             |             |             |
|---------------------|--------------|--------------|-------------|-------------|-------------|----------|----------|-------------|-------------|-------------|-------------|-------------|-------------|-------------|-------------|-------------|-------------|
| ENSMUSG00000079507  | -0.262999922 | 2.341597378  | 0.19948732  | 0.655134985 | 0.999071534 | H2-Q1    | H2-Q1    | 11.15862533 | 10.0200175  | 1.009803305 | 1.387642131 | 4.774386997 | 9.822891806 | 5.177223478 | 2.694215643 | 1.964216377 | 3.33330719  |
| ENSMUSG00000006850  | 0.174183146  | 2.627815935  | 0.19945026  | 0.655164947 | 0.999071534 | Tmco6    | Tmco6    | 9.193584394 | 5.276813952 | 4.510454763 | 3.469105327 | 7.325086899 | 8.440410737 | 6.471529348 | 6.493750525 | 3.064177549 | 7.25484506  |
| ENSMUSG000000023110 | 0.099769486  | 5.960349007  | 0.19928242  | 0.65530068  | 0.999071534 | Prmt5    | Prmt5    | 63.44275032 | 46.24623464 | 76.54309053 | 60.57057902 | 64.35612061 | 84.62239385 | 63.67984878 | 43.93643972 | 59.71217787 | 60.06488838 |
| ENSMUSG00000034936  | -0.164125783 | 3.227523489  | 0.199268191 | 0.655312191 | 0.999071534 | Arl4d    | Arl4d    | 8.000523824 | 15.23754141 | 8.953589305 | 10.06040545 | 8.306125323 | 6.112021568 | 5.371369359 | 9.740625788 | 8.092571475 | 11.82997258 |
| ENSMUSG00000037262  | 0.132883646  | 3.915321368  | 0.199265198 | 0.655314612 | 0.999071534 | Kln      | Kln      | 12.28150587 | 12.27303919 | 15.887572   | 17.06799821 | 16.28523784 | 14.91624311 | 10.48387754 | 12.78025369 | 15.94943698 | 20.32663796 |
| ENSMUSG00000033382  | 0.098155065  | 5.292244805  | 0.199140592 | 0.655415431 | 0.999071534 | Trappc8  | Trappc8  | 34.45839647 | 47.96564593 | 32.98690797 | 33.51155746 | 47.48225972 | 49.69655632 | 46.27143484 | 41.7948837  | 26.2419308  | 33.72522568 |
| ENSMUSG00000003604  | 0.136111493  | 3.900284905  | 0.198989834 | 0.655537462 | 0.999071534 | Aven     | Aven     | 17.82572852 | 13.16238986 | 15.07972936 | 12.48877918 | 14.84638148 | 26.92199976 | 20.32060215 | 9.049801264 | 9.663944577 | 11.69925465 |
| ENSMUSG000000025792 | -0.141621769 | 4.288739779  | 0.198942986 | 0.655575393 | 0.999071534 | Slc25a10 | Slc25a10 | 30.94939479 | 16.12689208 | 15.61829112 | 21.36968882 | 21.84445557 | 33.76164295 | 24.07408917 | 9.257048621 | 10.21392516 | 15.88222837 |
| ENSMUSG000000041084 | 0.162452016  | 7.187168878  | 0.198890702 | 0.655617733 | 0.999071534 | Ostc     | Ostc     | 225.3480877 | 139.3316044 | 101.1822912 | 127.3161655 | 122.4989979 | 162.2596202 | 337.6844014 | 77.37234668 | 71.49747614 | 110.7834448 |
| ENSMUSG000000042167 | 0.091571054  | 5.334908174  | 0.19878297  | 0.655704996 | 0.999071534 | Papd4    | Papd4    | 40.35351929 | 46.18694459 | 35.20847524 | 36.0093133  | 44.86615725 | 44.23939421 | 43.61810781 | 44.28185198 | 30.72034414 | 38.10427631 |
| ENSMUSG000000020514 | 0.109681689  | 5.009875829  | 0.198702979 | 0.655769807 | 0.999071534 | Mrpl22   | Mrpl22   | 38.80955855 | 21.34441599 | 35.747037   | 33.58093957 | 30.54299627 | 33.03402133 | 43.61810781 | 27.49481605 | 29.93465759 | 25.75143201 |
| ENSMUSG000000042215 | 0.13557626   | 4.693841043  | 0.198671535 | 0.655795288 | 0.999071534 | Bag2     | Bag2     | 27.58075318 | 25.4947191  | 21.94639183 | 24.83879414 | 27.66528356 | 42.63862665 | 44.84769838 | 19.27400422 | 15.16375043 | 12.81035704 |
| ENSMUSG00000036298  | -0.319107256 | 0.927550269  | 0.198658331 | 0.655805989 | 0.999071534 | Slc2a13  | Slc2a13  | 1.824680872 | 3.557402664 | 2.625488593 | 0.555056852 | 1.63506404  | 3.492583753 | 2.200319978 | 0.898071881 | 0           | 1.568615148 |
| ENSMUSG00000006005  | 0.100631725  | 6.807266373  | 0.198643099 | 0.655818334 | 0.999071534 | Tpr      | Tpr      | 91.86566391 | 121.7817512 | 112.4920882 | 99.21641237 | 136.0373281 | 158.6215121 | 86.20077091 | 115.298613  | 87.36834447 | 119.1493923 |
| ENSMUSG000000002658 | 0.105508737  | 6.084660468  | 0.198628236 | 0.65583038  | 0.999071534 | Gtf2f1   | Gtf2f1   | 50.38926408 | 67.2942004  | 83.74635411 | 54.11804311 | 83.91148653 | 64.90384808 | 54.5549924  | 68.94428749 | 70.31894631 | 74.83601436 |
| ENSMUSG000000020152 | 0.114361859  | 8.361889323  | 0.198594827 | 0.65585746  | 0.999071534 | Actr2    | Actr2    | 330.2672378 | 349.870552  | 320.0403275 | 301.1877245 | 339.9625152 | 484.7415201 | 419.7433935 | 258.7137842 | 247.5698322 | 272.7429589 |
| ENSMUSG000000037470 | -0.104619358 | 7.044502241  | 0.198538012 | 0.655903518 | 0.999071534 | Uggt1    | Uggt1    | 130.3945023 | 165.4785139 | 110.0685603 | 158.3993493 | 143.7548304 | 175.1385228 | 132.6663516 | 119.0981479 | 91.21820857 | 105.9468815 |
| ENSMUSG000000030051 | -0.157396799 | 3.255454871  | 0.198512166 | 0.655924473 | 0.999071534 | Aplf     | Aplf     | 11.9306057  | 9.604987194 | 12.11763966 | 7.493267507 | 10.59521498 | 14.98900527 | 11.58403753 | 6.217420715 | 6.756904338 | 4.64048648  |
| ENSMUSG000000028890 | 0.130535567  | 4.319066329  | 0.198335287 | 0.656067923 | 0.999071534 | Mtf1     | Mtf1     | 14.80798708 | 19.32855448 | 27.93789144 | 17.90058349 | 18.11650956 | 22.62903223 | 11.97232929 | 17.68510781 | 24.98483232 | 20.91486864 |
| ENSMUSG000000029145 | -0.114347846 | 4.977891758  | 0.198280431 | 0.656112427 | 0.999071534 | Elf2b4   | Elf2b4   | 39.23063875 | 23.18240736 | 38.43984582 | 39.27027231 | 28.58091942 | 35.79898347 | 26.46855503 | 18.09960253 | 28.20614718 | 36.99317391 |
| ENSMUSG000000081620 | -0.307917083 | 0.985222895  | 0.198246909 | 0.656139627 | 0.999071534 | Gm14633  | Gm14633  | 1.824680872 | 2.727342043 | 1.346404407 | 1.734552664 | 3.008517833 | 0           | 2.523896446 | 1.381649048 | 1.649941757 | 2.0261279   |
| ENSMUSG000000063235 | 0.121044478  | 5.398062266  | 0.1979174   | 0.656407138 | 0.999071534 | Ptpmt1   | Ptpmt1   | 48.63476324 | 33.380295   | 44.56598587 | 46.34724717 | 35.57899351 | 32.30639972 | 72.73998987 | 39.86057503 | 34.09879631 | 30.39191849 |
| ENSMUSG000000039953 | -0.101545756 | 6.813633799  | 0.197839057 | 0.65647078  | 0.999071534 | Clstn1   | Clstn1   | 120.6394777 | 107.0778202 | 116.396661  | 128.9813361 | 129.8240848 | 124.350534  | 82.05899213 | 97.68258768 | 112.7460201 | 101.8292667 |
| ENSMUSG000000028028 | -0.212842095 | 1.461740507  | 0.197831275 | 0.656477102 | 0.999071534 | Alpk1    | Alpk1    | 3.789721811 | 2.845922132 | 3.029409915 | 2.358991623 | 2.616102464 | 2.983248622 | 1.553167044 | 1.381649048 | 1.964216377 | 3.92153787  |
| ENSMUSG000000090709 | -0.357237994 | -0.429794641 | 0.197805506 | 0.65649804  | 0.999071534 | Gm17173  | Gm17173  | 0.421080201 | 1.541541155 | 0.605881983 | 0.555056852 | 0.39241537  | 0.436572969 | 0.647152935 | 1.036236786 | 0.235705965 | 0.196076894 |
| ENSMUSG000000046056 | -0.201925656 | 3.071960424  | 0.197718077 | 0.656569087 | 0.999071534 | Sbsn     | Sbsn     | 9.404124495 | 10.96865822 | 10.09803305 | 9.713494917 | 5.624620297 | 2.182864846 | 7.053966989 | 13.88557293 | 4.00700141  | 9.215613995 |
| ENSMUSG000000030796 | -0.102349809 | 5.433168131  | 0.197714613 | 0.656571903 | 0.999071534 | Tead2    | Tead2    | 52.77538522 | 42.4516718  | 48.67251931 | 40.3110039  | 47.80927253 | 73.85359395 | 30.35147264 | 38.40984353 | 27.57759794 | 37.31996873 |
| ENSMUSG000000039252 | -0.58393206  | -0.460698301 | 0.19763667  | 0.656635259 | 0.999071534 | Lgi2     | Lgi2     | 3.228281543 | 0           | 0.269280881 | 0           | 0.261610246 | 0.873145938 | 1.29430587  | 0.069082452 | 0.15713731  | 0           |
| ENSMUSG000000094786 | -0.277024985 | 0.86539183   | 0.197609522 | 0.656657329 | 0.999071534 | Gm14403  | Gm14403  | 1.614140771 | 4.209593153 | 0.875162864 | 1.80393477  | 1.046440986 | 1.382481069 | 3.17104938  | 1.105319238 | 0.549980586 | 1.241820326 |
| ENSMUSG000000063646 | 0.46151132   | -0.529384422 | 0.197527731 | 0.656723834 | 0.999071534 | Jakmp1   | Jakmp1   | 0.561440268 | 0.355740266 | 1.279084186 | 0.069382107 | 0.261610246 | 0.145524323 | 0           | 0.759906976 | 1.492804447 | 0.522871716 |
| ENSMUSG000000029392 | -0.116138561 | 4.776515274  | 0.197393851 | 0.65683273  | 0.999071534 | Rilpl1   | Rilpl1   | 20.84346996 | 28.34064123 | 29.01501497 | 31.01380163 | 37.86808316 | 24.22979979 | 18.96158099 | 35.64654544 | 21.84208612 | 24.44425272 |
| ENSMUSG000000079553 | -0.139992063 | 5.086729364  | 0.197238565 | 0.656959091 | 0.999071534 | Kifc1    | Kifc1    | 43.932701   | 17.66843323 | 41.94049727 | 41.76802814 | 38.45670622 | 56.02686437 | 28.02172208 | 12.84933615 | 30.17036356 | 32.02589261 |
| ENSMUSG000000019877 | 0.131498918  | 8.846931722  | 0.197131083 | 0.657046588 | 0.999071534 | Serinc1  | Serinc1  | 350.3387274 | 468.9842513 | 433.2729381 | 479.8466489 | 545.7843765 | 311.9313864 | 449.0594215 | 668.0963971 | 430.320524  | 408.2974513 |
| ENSMUSG000000061136 | 0.102147926  | 6.795877059  | 0.197030909 | 0.65712816  | 0.999071534 | Prpf40a  | Prpf40a  | 89.1286426  | 106.0105994 | 136.3234462 | 109.3461999 | 114.0620674 | 147.9982365 | 88.65995207 | 101.551205  | 110.703235  | 106.2083173 |
| ENSMUSG000000026667 | -0.095412563 | 6.123181372  | 0.196996897 | 0.657155862 | 0.999071534 | Uhmk1    | Uhmk1    | 64.00419059 | 84.01399292 | 64.56009131 | 75.69587824 | 84.76171983 | 94.00871269 | 53.71369359 | 56.44036361 | 49.81252733 | 76.27391158 |
| ENSMUSG000000081076 | 0.234624394  | 1.408355972  | 0.196965678 | 0.657181293 | 0.999071534 | Rpsa-ps4 | Rpsa-ps4 | 3.228281543 | 3.023792265 | 1.211763966 | 2.358991623 | 2.223687094 | 2.037340523 | 5.306654065 | 2.348803381 | 2.121353688 | 1.241820326 |
| ENSMUSG000000024317 | 0.110132932  | 4.69685594   | 0.196927786 | 0.65721216  | 0.999071534 | Rnf138   | Rnf138   | 26.10697248 | 24.36820825 | 27.60129034 | 27.75284262 | 22.69468887 | 28.30448083 | 38.37616903 | 20.24115855 | 22.23492939 | 20.261279   |
| ENSMUSG000000000340 | 0.131842821  | 3.712289156  | 0.196895476 | 0.657238485 | 0.999071534 | Dbt      | Dbt      | 11.79024564 | 11.44297857 | 15.41633046 | 13.18260024 | 12.29568158 | 16.00767553 | 14.23736457 | 11.605852   | 14.6923385  | 8.431306421 |
| ENSMUSG000000031422 | 0.112821593  | 8.939045283  | 0.196873845 | 0.65725611  | 0.999071534 | Morf4l2  | Morf4l2  | 505.9278618 | 507.8192303 | 459.5278241 | 434.956426  | 544.5417278 | 542.5874385 | 681.3226098 | 475.3563549 | 358.8230478 | 418.7548856 |

|                     |              |             |             |             |             |               |               |          |             |             |             |             |             |             |             |             |             |             |
|---------------------|--------------|-------------|-------------|-------------|-------------|---------------|---------------|----------|-------------|-------------|-------------|-------------|-------------|-------------|-------------|-------------|-------------|-------------|
| ENSMUSG00000031921  | -0.101837707 | 4.726569842 | 0.196865031 | 0.657263292 | 0.999071534 | Terf2         | Terf2         | TERF2    | 23.93139144 | 26.79910007 | 29.21697563 | 33.09526482 | 27.99229636 | 34.85307537 | 22.90921389 | 25.90591965 | 18.62077126 | 22.22204793 |
| ENSMUSG00000031590  | -0.108193559 | 6.345151519 | 0.196748444 | 0.657358309 | 0.999071534 | Frg1          | Frg1          | FRG1     | 82.46153941 | 64.50756831 | 109.5299985 | 104.1425419 | 74.10110229 | 71.59796694 | 61.93253586 | 72.60565747 | 79.98289089 | 84.57450007 |
| ENSMUSG00000050619  | 0.200947303  | 1.735957544 | 0.196708608 | 0.657390783 | 0.999071534 | Zfp709        | Zfp709        |          | 2.877381375 | 3.853852886 | 2.288887492 | 2.428373729 | 4.054958819 | 4.947826984 | 4.27120937  | 2.072473572 | 3.142746204 | 2.287563758 |
| ENSMUSG00000020818  | 0.093046799  | 5.697086252 | 0.196532803 | 0.657534144 | 0.999071534 | Mfsd11        | Mfsd11        | MFSD11   | 60.84608908 | 49.21073686 | 46.11435093 | 45.93095454 | 58.53529263 | 48.16855093 | 62.38554291 | 52.29541646 | 45.01983937 | 47.97347995 |
| ENSMUSG00000000275  | -0.099903571 | 5.629456792 | 0.196445415 | 0.657605434 | 0.999071534 | Trim25        | Trim25        | TRIM25   | 63.02167012 | 68.71716147 | 39.11304802 | 41.3517355  | 54.21872356 | 71.16139397 | 51.51337361 | 42.48570822 | 30.01322625 | 40.98007074 |
| ENSMUSG00000064215  | -0.104191229 | 6.281514353 | 0.196440313 | 0.657609597 | 0.999071534 | Ifi27         | Ifi27         | IFI27    | 91.44458371 | 93.44110999 | 55.13526046 | 92.97202278 | 84.3039019  | 68.25090751 | 92.80173085 | 69.91144182 | 48.31972289 | 83.20196181 |
| ENSMUSG00000016831  | -0.09602079  | 5.913010335 | 0.196124307 | 0.65786755  | 0.999071534 | Tox4          | Tox4          | TOX4     | 60.56536895 | 74.82403604 | 54.2600976  | 58.35035161 | 75.08214071 | 67.74157238 | 55.07271475 | 65.21383506 | 52.48386161 | 39.47681456 |
| ENSMUSG00000039630  | 0.143633988  | 8.445968808 | 0.196117504 | 0.657873107 | 0.999071534 | Hnrrnpu       | Hnrrnpu       | HNRNPU   | 183.4506077 | 206.5072247 | 522.4722301 | 368.55775   | 431.9185168 | 381.8558237 | 257.8904445 | 324.6875263 | 347.9805734 | 439.4083184 |
| ENSMUSG00000020441  | 0.1494087    | 4.446149229 | 0.196067807 | 0.657913698 | 0.999071534 | 2310033P09Rik | 2310033P09Rik | C1orf35  | 16.07122768 | 14.17032061 | 29.55357673 | 23.17362359 | 23.28331193 | 19.79130793 | 14.43151045 | 12.02034672 | 29.93465759 | 30.45727746 |
| ENSMUSG00000028582  | -0.115955232 | 5.526946802 | 0.196000261 | 0.657968876 | 0.999071534 | Cc2d1b        | Cc2d1b        | CC2D1B   | 46.2486421  | 31.2458534  | 66.24309682 | 55.57506735 | 47.94007765 | 51.806659   | 24.8506727  | 49.73936572 | 35.35589479 | 51.82965885 |
| ENSMUSG00000030621  | -0.220530295 | 2.357240679 | 0.195870243 | 0.658075123 | 0.999071534 | Me3           | Me3           | ME3      | 2.245761073 | 2.845922132 | 5.92417939  | 9.227820171 | 7.325086899 | 3.783632399 | 1.747312924 | 5.388431287 | 4.714119306 | 6.143742663 |
| ENSMUSG00000041263  | -0.165286894 | 3.135263986 | 0.19581996  | 0.658116223 | 0.999071534 | Rusc1         | Rusc1         | RUSC1    | 10.456825   | 7.411255551 | 14.06992605 | 5.758714844 | 10.00659192 | 9.459080998 | 5.047792891 | 5.388431287 | 7.935434165 | 11.43781879 |
| ENSMUSG00000038095  | 0.101539728  | 6.499996462 | 0.195818207 | 0.658117656 | 0.999071534 | Sbno1         | Sbno1         | SBNO1    | 81.47901894 | 104.5876383 | 82.80387102 | 80.76077202 | 103.7938653 | 90.73441542 | 66.5273217  | 103.0019365 | 92.78958167 | 91.96006306 |
| ENSMUSG00000020717  | -0.124753813 | 6.066164349 | 0.195782135 | 0.658147144 | 0.999071534 | Pecam1        | Pecam1        | PECAM1   | 71.93453438 | 131.5053185 | 67.38754056 | 45.16775136 | 47.87467509 | 86.65973437 | 75.19917102 | 49.87753063 | 53.74096009 | 46.86237755 |
| ENSMUSG00000034327  | 0.097374309  | 4.947481148 | 0.195723123 | 0.658195394 | 0.999071534 | Kctd9         | Kctd9         | KCTD9    | 32.8442557  | 34.26964567 | 29.35161607 | 24.14497308 | 34.07473459 | 34.92583753 | 40.25291254 | 28.80738265 | 23.64916518 | 26.53573959 |
| ENSMUSG00000033446  | -0.106300504 | 4.321476987 | 0.195718983 | 0.658198779 | 0.999071534 | Lpar6         | Lpar6         | LPAR6    | 23.15941107 | 21.52228612 | 19.5228639  | 20.81463196 | 21.90985813 | 18.69987551 | 16.24353866 | 20.44840591 | 15.24231909 | 21.37238139 |
| ENSMUSG00000032218  | 0.12041828   | 5.893108383 | 0.19566176  | 0.658245574 | 0.999071534 | Ccnb2         | Ccnb2         | CCNB2    | 67.30265217 | 30.29721269 | 69.87838871 | 61.88883904 | 65.27175647 | 87.53288031 | 87.3656462  | 38.27167863 | 44.78413341 | 46.53558273 |
| ENSMUSG00000028757  | -0.114146152 | 7.311683047 | 0.195626705 | 0.658274245 | 0.999071534 | Ddost         | Ddost         | DDOST    | 211.6629812 | 174.905631  | 140.6319403 | 156.1097397 | 175.2788651 | 170.9910796 | 224.5620684 | 132.9837209 | 94.75379805 | 122.6134174 |
| ENSMUSG00000097628  | -0.421722581 | 0.052414889 | 0.195568397 | 0.658321942 | 0.999071534 | Gm2383        | Gm2383        |          | 0.631620302 | 1.778701332 | 2.423527932 | 0           | 0.523220493 | 0.291048646 | 0.388291761 | 1.036236786 | 0.078568655 | 1.895409971 |
| ENSMUSG00000000563  | 0.125586097  | 8.526309353 | 0.195513027 | 0.658367242 | 0.999071534 | Atp5f1        | Atp5f1        | ATP5F1   | 461.0828204 | 312.1027938 | 341.0442363 | 393.8822189 | 319.4261108 | 348.3852294 | 599.9754858 | 289.6627229 | 275.2259988 | 345.6835633 |
| ENSMUSG00000025188  | -0.11432352  | 4.37143258  | 0.195367029 | 0.658486726 | 0.999071534 | Hps1          | Hps1          | HP51     | 21.9663505  | 21.64086621 | 19.1862628  | 21.85536356 | 26.42263488 | 22.62903223 | 12.42533635 | 24.04069343 | 13.8280833  | 23.00635551 |
| ENSMUSG00000041133  | -0.10125719  | 6.569630584 | 0.195253025 | 0.658580064 | 0.999071534 | Smc1a         | Smc1a         | SMC1A    | 104.7787901 | 116.3863572 | 93.03654451 | 93.04140488 | 103.1398396 | 151.5635825 | 66.59203699 | 70.87859616 | 67.3333742  | 97.64629297 |
| ENSMUSG00000045690  | 0.145720895  | 3.652323053 | 0.195204616 | 0.658619707 | 0.999071534 | Wdr89         | Wdr89         | WDR89    | 11.22880537 | 9.249246928 | 12.05031944 | 18.87193298 | 9.287163747 | 11.42365936 | 11.64875283 | 10.36236786 | 14.84947581 | 13.39858772 |
| ENSMUSG00000074211  | 0.181261903  | 2.903544674 | 0.195158257 | 0.658657678 | 0.999071534 | Sdhaf1        | Sdhaf1        | SDHAF1   | 10.52700503 | 6.759065062 | 9.088229746 | 4.162926393 | 5.428412612 | 8.076599929 | 14.36679515 | 4.766689215 | 4.16413872  | 6.928050238 |
| ENSMUSG00000031755  | -0.150302545 | 3.126231663 | 0.195120585 | 0.658688536 | 0.999071534 | Bbs2          | Bbs2          | BBS2     | 8.000523824 | 11.32439848 | 8.549667983 | 8.04832436  | 11.11843547 | 6.330308052 | 7.377543457 | 10.50053276 | 6.049786443 | 6.692742279 |
| ENSMUSG00000062519  | 0.178603677  | 2.660576816 | 0.195085042 | 0.658717655 | 0.999071534 | Zfp398        | Zfp398        | ZNF398   | 4.491522147 | 7.766995817 | 7.607184899 | 4.02416218  | 6.344048475 | 9.895653967 | 2.912188207 | 7.046410144 | 4.242707375 | 8.365947457 |
| ENSMUSG00000034686  | 0.164262663  | 3.106476918 | 0.19494103  | 0.658835668 | 0.999071534 | Prr7          | Prr7          | PRR7     | 9.614664595 | 4.03172302  | 10.56927459 | 7.909560147 | 9.41796887  | 9.531843159 | 12.29590576 | 5.112101477 | 7.464022234 | 8.954178137 |
| ENSMUSG00000010406  | 0.116338628  | 6.852979789 | 0.194753753 | 0.658989214 | 0.999071534 | Mrpl52        | Mrpl52        | MRPL52   | 144.290149  | 73.63823515 | 140.3626594 | 122.8757107 | 92.61002722 | 105.1413234 | 123.8003564 | 88.84003378 | 119.5814931 | 133.5283645 |
| ENSMUSG00000042962  | -0.171546859 | 3.014387837 | 0.194715906 | 0.659020254 | 0.999071534 | Gm5436        | Gm5436        |          | 7.649623656 | 8.419186306 | 12.65620142 | 5.411804311 | 9.744981678 | 8.076599929 | 12.49005164 | 5.526596192 | 3.064177549 | 7.712357812 |
| ENSMUSG000000002733 | 0.097437886  | 5.063622772 | 0.194688353 | 0.659042854 | 0.999071534 | Plekha3       | Plekha3       | PLEKHA3  | 31.51083506 | 29.6450222  | 30.63070026 | 28.23851737 | 47.6784674  | 41.25614558 | 36.88771728 | 28.66921774 | 25.84908753 | 35.09776394 |
| ENSMUSG00000038970  | -0.121417802 | 4.062398948 | 0.194624302 | 0.6590954   | 0.999071534 | Lmtk2         | Lmtk2         | LMTK2    | 15.08870721 | 21.70015625 | 16.29149332 | 13.59889288 | 23.34871449 | 24.15703763 | 14.43151045 | 15.88896405 | 12.41384751 | 11.17638293 |
| ENSMUSG00000062646  | 0.188692836  | 2.445049079 | 0.19460921  | 0.659107782 | 0.999071534 | Ganc          | Ganc          | GANC     | 3.859901845 | 4.624623464 | 7.472544458 | 5.82809695  | 3.858751134 | 4.220205368 | 3.300479967 | 4.973936572 | 7.464022234 | 6.405178521 |
| ENSMUSG00000037426  | -0.158591163 | 3.454142224 | 0.194593086 | 0.659121012 | 0.999071534 | Depdc5        | Depdc5        | DEPDC5   | 15.29924731 | 14.76322106 | 7.674505119 | 6.799446442 | 15.30419941 | 16.0804377  | 8.9307105   | 8.980718811 | 4.242707375 | 13.0717929  |
| ENSMUSG000000002279 | -0.127021458 | 3.740213023 | 0.1945881   | 0.659125103 | 0.999071534 | Lmf1          | Lmf1          | LMF1     | 12.3516859  | 16.71979252 | 15.75293156 | 11.51742969 | 15.5004071  | 12.22404314 | 9.642578728 | 14.71456236 | 9.113963991 | 15.29399769 |
| ENSMUSG00000041623  | -0.166006063 | 2.353634775 | 0.194548271 | 0.659157786 | 0.999071534 | D11Wsu47e     | D11Wsu47e     | C17orf80 | 6.807463254 | 5.395394041 | 4.577774983 | 4.856747458 | 5.75542542  | 6.69411886  | 5.565515239 | 3.799534882 | 3.299883514 | 3.725460977 |
| ENSMUSG00000032306  | 0.13323883   | 3.912733381 | 0.194472522 | 0.659219956 | 0.999071534 | Mpi           | Mpi           | MPI      | 18.03626862 | 11.56155866 | 20.5326672  | 11.17051915 | 12.81890207 | 25.83056734 | 17.47312924 | 11.39860464 | 8.956826681 | 14.44433116 |
| ENSMUSG00000038055  | -0.120097403 | 4.37328171  | 0.194344322 | 0.659325207 | 0.999071534 | Dexi          | Dexi          | DEXI     | 22.03653053 | 16.36405226 | 25.58168373 | 25.94890785 | 20.92881971 | 17.89949173 | 13.20191987 | 19.34308667 | 20.11357571 | 23.07171447 |
| ENSMUSG00000017831  | 0.101938756  | 6.440004901 | 0.194306697 | 0.659356105 | 0.999071534 | Rab5a         | Rab5a         | RAB5A    | 74.32065552 | 97.88786332 | 91.75746033 | 74.23885401 | 96.66498604 | 72.18006423 | 102.1207331 | 109.495687  | 67.09763145 | 78.69219326 |
| ENSMUSG00000041231  | 0.134180067  | 4.70589122  | 0.194116388 | 0.65951244  | 0.999071534 | Ublcp1        | Ublcp1        | UBLCP1   | 37.75685805 | 17.4905631  | 25.71632417 | 20.25957511 | 27.9268938  | 44.74872934 | 40.64120431 | 15.12905707 | 14.53520119 | 21.37238139 |

|                    |              |              |             |             |             |               |               |               |             |             |             |             |             |             |             |             |             |             |
|--------------------|--------------|--------------|-------------|-------------|-------------|---------------|---------------|---------------|-------------|-------------|-------------|-------------|-------------|-------------|-------------|-------------|-------------|-------------|
| ENSMUSG00000084846 | 0.256600874  | 1.941768204  | 0.193943376 | 0.659654647 | 0.999071534 | A730011C13Rik | A730011C13Rik |               | 2.737021308 | 1.126510844 | 5.722218729 | 4.509836926 | 3.335530641 | 1.236956746 | 1.617882337 | 5.112101477 | 2.907040239 | 8.104511599 |
| ENSMUSG00000070730 | -0.112355746 | 4.293343139  | 0.193899583 | 0.659690654 | 0.999071534 | Rmdn3         | Rmdn3         | RMDN3         | 22.45761073 | 22.53021687 | 23.831358   | 15.61097397 | 20.99422227 | 28.30448083 | 18.96158099 | 18.92859196 | 10.13535651 | 16.73189491 |
| ENSMUSG00000028843 | -0.11133422  | 7.02296031   | 0.193691691 | 0.659861654 | 0.999071534 | Sh3bgrl3      | Sh3bgrl3      | SH3BGRl3      | 128.4996414 | 99.13295425 | 184.3900835 | 149.102147  | 137.2145742 | 126.3878746 | 112.7340412 | 128.0788667 | 80.76857744 | 158.4954889 |
| ENSMUSG00000037341 | -0.526828232 | -0.76318152  | 0.193621219 | 0.659919644 | 0.999071534 | Slc9a7        | Slc9a7        | SLC9A7        | 0           | 0.474320355 | 1.548365068 | 0.277528426 | 0.457817931 | 1.382481069 | 0.258861174 | 0           | 0.31427462  | 0           |
| ENSMUSG00000020608 | 0.091848085  | 6.357082727  | 0.193592089 | 0.659943619 | 0.999071534 | Smc6          | Smc6          | SMC6          | 76.49623656 | 80.16014004 | 88.72805041 | 84.09111314 | 81.29538406 | 118.9661341 | 89.17767441 | 66.25007185 | 65.60482701 | 74.31314264 |
| ENSMUSG00000058706 | 0.113060885  | 4.331959054  | 0.193493977 | 0.660024382 | 0.999071534 | O610030E20Rik | O610030E20Rik | C2orf68       | 22.94887097 | 15.17825137 | 19.59018412 | 21.2309246  | 20.73261203 | 22.55627007 | 14.36679515 | 19.41216912 | 19.2493205  | 24.24817583 |
| ENSMUSG00000031388 | 0.107361569  | 6.661258257  | 0.193433293 | 0.660074348 | 0.999071534 | Naa10         | Naa10         | NAA10         | 101.0592483 | 70.37728271 | 116.3293408 | 110.4563136 | 105.6905395 | 92.26242081 | 106.3272272 | 78.75399573 | 109.7604112 | 109.8684193 |
| ENSMUSG00000025555 | -0.107029879 | 6.3765093    | 0.193333518 | 0.660156521 | 0.999071534 | Farp1         | Farp1         | FARP1         | 70.88183388 | 103.1646773 | 88.25680887 | 67.99446442 | 118.1170262 | 108.3428585 | 47.50102541 | 92.2941564  | 62.93349273 | 78.49611637 |
| ENSMUSG00000029345 | -0.105207166 | 4.85356845   | 0.193254927 | 0.660221265 | 0.999071534 | Tfip11        | Tfip11        | TFIP11        | 31.79155519 | 37.70846824 | 24.23527932 | 30.59750899 | 30.60839883 | 42.85691314 | 24.26823505 | 30.39627905 | 15.71373102 | 24.57497065 |
| ENSMUSG00000021277 | -0.100622601 | 5.18279379   | 0.193164654 | 0.660295652 | 0.999071534 | Traf3         | Traf3         | TRAF3         | 32.07227533 | 37.29343793 | 41.60389617 | 39.27027231 | 44.01592395 | 52.82532927 | 24.98010328 | 28.60013529 | 25.06340098 | 40.91471178 |
| ENSMUSG00000056724 | 0.185904417  | 2.59948028   | 0.193147241 | 0.660310004 | 0.999071534 | Nbeal2        | Nbeal2        | NBEAL2        | 8.491784059 | 7.766995817 | 5.250977187 | 2.150845303 | 5.428412612 | 9.604605321 | 3.624056435 | 5.388431287 | 4.32127603  | 8.235229528 |
| ENSMUSG00000035790 | -0.118834916 | 3.835081625  | 0.19313656  | 0.660318807 | 0.999071534 | Cep19         | Cep19         | CEP19         | 15.22906728 | 17.13482283 | 11.78103856 | 14.57024238 | 17.78949675 | 16.22596202 | 13.26663516 | 11.74401691 | 12.09957289 | 12.22212636 |
| ENSMUSG00000041688 | -0.106419369 | 5.696606495  | 0.193131859 | 0.660322682 | 0.999071534 | Amot          | Amot          | AMOT          | 40.77459949 | 66.46413978 | 41.26729507 | 57.72591265 | 72.204428   | 70.14272371 | 31.12805616 | 49.94661308 | 41.56281855 | 50.39176163 |
| ENSMUSG00000046761 | -0.123661984 | 3.946234342  | 0.193126368 | 0.660327208 | 0.999071534 | Fam83h        | Fam83h        | FAM83H        | 19.93112953 | 14.46677084 | 13.59868451 | 13.04383603 | 22.10606582 | 16.80805931 | 10.22501637 | 16.71795348 | 11.70672961 | 15.29399769 |
| ENSMUSG00000020914 | 0.125435724  | 8.039789143  | 0.19310074  | 0.660348332 | 0.999071534 | Top2a         | Top2a         | TOP2A         | 308.8623276 | 197.9694583 | 270.4926453 | 212.1704818 | 321.5843954 | 481.2489363 | 304.0971641 | 174.9167695 | 199.8000899 | 209.2794043 |
| ENSMUSG00000025521 | -0.123173947 | 4.652482822  | 0.19306519  | 0.660377637 | 0.999071534 | Tmem192       | Tmem192       | TMEM192       | 29.19489395 | 32.07591402 | 20.12874588 | 26.57334681 | 27.59988099 | 29.97801055 | 37.21129375 | 21.83005496 | 9.821081887 | 20.0652021  |
| ENSMUSG00000021384 | -0.190697579 | 2.779336804  | 0.193037949 | 0.660400095 | 0.999071534 | Susd3         | Susd3         | SUSD3         | 15.08870721 | 5.632554219 | 4.847055865 | 5.897479057 | 6.017035667 | 10.91432423 | 8.801279913 | 3.17779281  | 4.00700141  | 4.575127515 |
| ENSMUSG00000090188 | -0.346419151 | -0.268057423 | 0.193001491 | 0.660430156 | 0.999071534 | Gm7418        | Gm7418        |               | 0.912340436 | 0.5336104   | 0.740522424 | 1.110113705 | 0.719428178 | 0.218286485 | 1.617882337 | 0.483577167 | 0.15713731  | 0.457512752 |
| ENSMUSG00000022179 | -0.214443105 | 1.927116772  | 0.192774035 | 0.660617772 | 0.999071534 | 4931414P19Rik | 4931414P19Rik | C14orf93      | 4.912602348 | 3.853852886 | 1.144443746 | 4.926129565 | 5.624620297 | 4.365729691 | 4.530070544 | 3.592287524 | 2.357059653 | 1.764692042 |
| ENSMUSG00000096687 | 0.127748434  | 3.854990426  | 0.192721243 | 0.660661335 | 0.999071534 | AA474331      | Mfsd4b4       | MFSD4B        | 13.33420637 | 13.63671021 | 17.50325729 | 11.51742969 | 15.23879685 | 12.15128097 | 13.20191987 | 16.99428329 | 15.63516236 | 12.67963911 |
| ENSMUSG00000075592 | -0.310983624 | 0.914712611  | 0.192628332 | 0.660738024 | 0.999071534 | Nynrin        | Nynrin        | NYNRIN        | 2.315941107 | 2.01586151  | 1.683005509 | 2.22022741  | 1.765869163 | 3.856394561 | 2.265035272 | 1.657978857 | 0           | 0.392153787 |
| ENSMUSG00000022174 | -0.122757141 | 6.166406461  | 0.192550345 | 0.66080241  | 0.999071534 | Dad1          | Dad1          | DAD1          | 87.37414176 | 94.56762083 | 67.522181   | 65.28856226 | 74.36271253 | 86.87802086 | 117.3935424 | 47.66689215 | 28.04900987 | 61.89493939 |
| ENSMUSG00000028407 | 0.186113575  | 2.856939039  | 0.192484168 | 0.660857059 | 0.999071534 | 2010003O02Rik | Toporsos      | TOPORS-AS1    | 5.54422265  | 4.506043375 | 8.213066882 | 8.950291745 | 7.128879214 | 5.893735083 | 4.206494076 | 5.043019025 | 11.47102364 | 8.365947457 |
| ENSMUSG00000063450 | 0.117734957  | 5.084993558  | 0.192475102 | 0.660864546 | 0.999071534 | Syne2         | Syne2         | SYNE2         | 20.00130956 | 27.98490096 | 40.79605353 | 33.58093957 | 45.78179312 | 34.92583753 | 24.7859574  | 43.2456152  | 33.86309035 | 30.84943125 |
| ENSMUSG00000045071 | 0.188412808  | 2.778400497  | 0.192323219 | 0.660990016 | 0.999071534 | E130308A19Rik | E130308A19Rik | KIAA1958      | 5.474042616 | 6.699775018 | 5.92417939  | 7.285121188 | 7.194281776 | 5.820972922 | 2.588611739 | 13.12566595 | 4.566981996 | 8.235229528 |
| ENSMUSG00000026321 | -0.12818303  | 4.33941181   | 0.192284062 | 0.661022372 | 0.999071534 | Tnfrsf11a     | Tnfrsf11a     | TNFRSF11A     | 28.35273355 | 14.17032061 | 25.64900395 | 15.19468133 | 26.29182976 | 32.5246862  | 22.65035272 | 12.50392388 | 11.47102364 | 17.05868974 |
| ENSMUSG00000037601 | 0.136889067  | 8.491479757  | 0.191997632 | 0.66125918  | 0.999071534 | Nme1          | Nme1          | NME1          | 439.6077301 | 219.017424  | 385.4082615 | 430.5853532 | 296.6006168 | 397.6452127 | 530.1476842 | 184.7955602 | 318.4387591 | 391.5001974 |
| ENSMUSG00000063145 | 0.179395993  | 3.042546114  | 0.191993762 | 0.661262381 | 0.999071534 | Bbs5          | Bbs5          | RP11-724O16.1 | 6.73728322  | 9.071376794 | 10.77123525 | 4.509836926 | 8.567735569 | 8.294886414 | 9.901439902 | 10.36236786 | 2.199922343 | 11.69925465 |
| ENSMUSG00000030286 | -0.108325584 | 6.95878055   | 0.19198514  | 0.661269513 | 0.999071534 | Emc3          | Emc3          | EMC3          | 141.1320475 | 166.7828949 | 103.1345776 | 136.127693  | 121.9757774 | 112.635826  | 169.4246383 | 106.1106469 | 85.95410868 | 103.9207536 |
| ENSMUSG00000058239 | -0.090812277 | 5.715734837  | 0.191961429 | 0.661289126 | 0.999071534 | Usf2          | Usf2          | USF2          | 69.82913337 | 61.95809641 | 45.97971049 | 44.19640187 | 59.97414898 | 59.81049677 | 44.84769838 | 44.8345116  | 41.40568124 | 55.29368397 |
| ENSMUSG00000036188 | -0.113719503 | 4.212778791  | 0.191831116 | 0.661396945 | 0.999071534 | Ankmy2        | Ankmy2        | ANKMY2        | 17.19410822 | 20.63293545 | 19.72482456 | 16.51294136 | 25.57240158 | 20.66445387 | 17.861421   | 20.72473572 | 9.821081887 | 17.58156145 |
| ENSMUSG00000042644 | -0.11757051  | 7.273112023  | 0.191565011 | 0.661617252 | 0.999071534 | Itpr3         | Itpr3         | ITPR3         | 135.3772847 | 197.4358479 | 172.2724439 | 149.9347323 | 180.6418751 | 158.6942743 | 80.18224862 | 178.0945623 | 125.1598676 | 170.5215384 |
| ENSMUSG00000030780 | 0.129173277  | 3.589743317  | 0.191366455 | 0.661781754 | 0.999071534 | BC017158      | BC017158      | C16orf58      | 9.053224327 | 14.11103057 | 12.11763966 | 10.82360862 | 12.9497072  | 14.98900527 | 8.801279913 | 13.67832557 | 9.663944577 | 13.26786979 |
| ENSMUSG00000001847 | -0.106328524 | 8.809025045  | 0.191331666 | 0.661810587 | 0.999071534 | Rac1          | Rac1          | RAC1          | 508.1736229 | 491.336598  | 459.0565825 | 444.1842461 | 513.933329  | 532.0369251 | 438.0578216 | 425.9624015 | 322.0529172 | 386.7943519 |
| ENSMUSG00000031641 | -0.165237574 | 2.964456965  | 0.191274784 | 0.661857737 | 0.999071534 | Cbr4          | Cbr4          | CBR4          | 10.0357448  | 8.47847635  | 5.385617627 | 8.880909638 | 9.352566308 | 7.130691829 | 12.55476693 | 5.250266382 | 3.928432755 | 6.470537486 |
| ENSMUSG00000096917 | 0.232396918  | 1.433557365  | 0.191007767 | 0.662079182 | 0.999071534 | 2500002B13Rik | 2500002B13Rik |               | 1.754500839 | 2.608761954 | 1.481044848 | 2.914048475 | 3.466335765 | 1.673529715 | 2.718042326 | 3.592287524 | 0.864255206 | 4.575127515 |
| ENSMUSG00000085348 | 0.432734018  | -0.382275735 | 0.190992792 | 0.662091607 | 0.999071534 | Gm12300       | Gm12300       |               | 1.122880537 | 0.592900444 | 0.471241542 | 0           | 0.654025616 | 0.291048646 | 0.064715293 | 0.345412262 | 0.471411931 | 2.287563758 |
| ENSMUSG00000027168 | 0.13771112   | 4.141970074  | 0.190939631 | 0.662135718 | 0.999071534 | Pax6          | Pax6          | PAX6          | 17.12392818 | 9.427117061 | 24.1679591  | 20.81463196 | 14.58477124 | 24.08427546 | 15.40223985 | 12.22759407 | 21.37067419 | 14.96720287 |
| ENSMUSG00000060445 | 0.389516185  | -0.038275288 | 0.190778409 | 0.662269543 | 0.999071534 | Sycp2         | Sycp2         | SYCP2         | 2.526481208 | 0.296450222 | 0.605881983 | 0.346910533 | 0.065402562 | 0.218286485 | 0.711868228 | 0.898071881 | 0.707117896 | 1.960768935 |

|                    |              |              |             |             |             |               |               |          |             |             |             |             |             |             |             |             |             |             |
|--------------------|--------------|--------------|-------------|-------------|-------------|---------------|---------------|----------|-------------|-------------|-------------|-------------|-------------|-------------|-------------|-------------|-------------|-------------|
| ENSMUSG00000067925 | -0.133258543 | 4.711763628  | 0.190759158 | 0.662285527 | 0.999071534 | Cxx1a         | Cxx1a         | FAM127A  | 21.61545033 | 19.68429474 | 40.45945243 | 27.61407841 | 31.98185262 | 26.63095112 | 14.36679515 | 34.81755601 | 12.88525944 | 32.67948225 |
| ENSMUSG00000035934 | -0.475366882 | -0.723780834 | 0.190619477 | 0.662401531 | 0.999071534 | Pknox2        | Pknox2        | PKNOX2   | 0.140360067 | 0.711480533 | 1.009803305 | 0.416292639 | 0.523220493 | 1.236956746 | 0.064715293 | 0.759906976 | 0           | 0           |
| ENSMUSG00000027170 | 0.121940796  | 7.249337968  | 0.190595997 | 0.662421037 | 0.999071534 | Elf3m         | Elf3m         | EIF3M    | 201.6974164 | 149.3516218 | 118.6855485 | 149.3796754 | 137.4107819 | 124.350534  | 245.1415317 | 118.6145708 | 135.3737927 | 133.1362107 |
| ENSMUSG00000041444 | 0.159914388  | 3.581248289  | 0.190546725 | 0.662461972 | 0.999071534 | Arhgap32      | Arhgap32      | ARHGA32  | 7.71980369  | 14.52606088 | 8.953589305 | 15.95788451 | 10.46440986 | 15.71662689 | 5.694945826 | 19.48125158 | 8.878258026 | 10.98030604 |
| ENSMUSG00000039367 | -0.105655429 | 6.350931729  | 0.190452034 | 0.662540659 | 0.999071534 | Sec24c        | Sec24c        | SEC24C   | 96.91862632 | 123.0268421 | 57.55878839 | 61.26440008 | 102.6820217 | 108.3428585 | 85.29475681 | 65.83557713 | 51.69817505 | 75.81639883 |
| ENSMUSG00000034334 | 0.263295261  | 2.052538317  | 0.190250187 | 0.662708471 | 0.999071534 | Fam151b       | Fam151b       | FAM151B  | 2.807201342 | 1.126510844 | 6.462741153 | 6.244389589 | 2.092881971 | 1.236956746 | 1.876743511 | 5.319348834 | 6.992610304 | 4.313691657 |
| ENSMUSG00000034160 | 0.137485415  | 7.772837879  | 0.19019465  | 0.662754661 | 0.999071534 | Ogt           | Ogt           | OGT      | 195.1706733 | 193.581995  | 211.4528121 | 249.2205267 | 227.797122  | 140.6492582 | 123.9945023 | 299.610596  | 230.8347087 | 275.6187533 |
| ENSMUSG00000068114 | 0.147908333  | 3.668683241  | 0.19018199  | 0.662765192 | 0.999071534 | Ccdc134       | Ccdc134       | CCDC134  | 14.38690688 | 13.16238986 | 12.52156098 | 9.713494917 | 12.4264867  | 22.41074575 | 18.24971276 | 8.773471454 | 4.478413341 | 13.13715187 |
| ENSMUSG00000061731 | 0.114983915  | 8.004155988  | 0.190091572 | 0.662840414 | 0.999071534 | Ext1          | Ext1          | EXT1     | 195.7321135 | 256.2515719 | 309.9422945 | 262.5418912 | 251.4728493 | 303.6365    | 208.9009674 | 236.8837293 | 272.1618213 | 256.011064  |
| ENSMUSG00000029861 | -0.111173363 | 4.195307891  | 0.190033444 | 0.662888783 | 0.999071534 | Fam131b       | Fam131b       | FAM131B  | 21.61545033 | 21.04796576 | 19.92678522 | 17.34552664 | 18.24731469 | 28.15895651 | 16.8906916  | 15.12905707 | 13.04239675 | 13.26786979 |
| ENSMUSG00000019054 | -0.103437082 | 6.894265079  | 0.189981806 | 0.662931761 | 0.999071534 | Fis1          | Fis1          | FIS1     | 158.2559756 | 109.8051622 | 135.044362  | 119.3372233 | 116.9397801 | 107.8335234 | 155.5108502 | 104.1763382 | 78.80436106 | 108.1037273 |
| ENSMUSG00000049076 | -0.095306459 | 6.181458982  | 0.189970812 | 0.662940912 | 0.999071534 | Acap2         | Acap2         | ACAP2    | 66.951752   | 83.77683275 | 74.32152326 | 76.3203172  | 87.11621205 | 90.15231813 | 49.31305363 | 80.6883044  | 50.36250792 | 71.50270717 |
| ENSMUSG00000030771 | 0.333703104  | 0.059754236  | 0.189905121 | 0.662995596 | 0.999071534 | Micalc1       | Micalc1       | MICALCL  | 0.210540101 | 1.126510844 | 0.403921322 | 0.763203172 | 1.700466601 | 0.509335131 | 0.323576467 | 1.174401691 | 1.335667137 | 1.372538255 |
| ENSMUSG00000051355 | 0.113963295  | 6.277417653  | 0.18976383  | 0.663113252 | 0.999071534 | Commdd1       | Commdd1       | COMMDD1  | 94.67286525 | 49.86292735 | 80.04374199 | 92.41696592 | 67.62624869 | 64.03070214 | 111.3103048 | 62.17420715 | 74.24737907 | 71.24127131 |
| ENSMUSG00000052912 | 0.707475088  | -1.298820722 | 0.189456544 | 0.663369317 | 0.999071534 | Smarca5-ps    | Smarca5-ps    |          | 1.122880537 | 0           | 0           | 0           | 0.065402562 | 0           | 0.129430587 | 0.207247357 | 1.178529826 | 0           |
| ENSMUSG00000021945 | 0.09733986   | 6.065072493  | 0.18937536  | 0.663437009 | 0.999071534 | Zmym2         | Zmym2         | ZMYM2    | 56.00366677 | 78.55930884 | 67.1855799  | 61.61131062 | 72.00822032 | 60.24706974 | 59.73221588 | 86.21490059 | 52.71956757 | 72.09093785 |
| ENSMUSG00000027134 | 0.094285195  | 5.478669678  | 0.189305209 | 0.663495516 | 0.999071534 | Lpcat4        | Lpcat4        | LPCAT4   | 44.70468137 | 35.87047687 | 53.78885605 | 38.02139439 | 51.27560829 | 53.18914007 | 38.31145374 | 42.41662577 | 33.62738438 | 55.75119672 |
| ENSMUSG00000087022 | 0.275301088  | 0.819566572  | 0.189250239 | 0.663541371 | 0.999071534 | 9130024F11Rik | 9130024F11Rik |          | 1.122880537 | 0.474320355 | 0.875162864 | 1.80393477  | 3.400933203 | 1.673529715 | 0.906014109 | 1.865226215 | 1.021392516 | 3.202589261 |
| ENSMUSG00000092212 | 0.397999709  | -0.22887751  | 0.1892073   | 0.663577195 | 0.999071534 | Slc22a13b-ps  | Slc22a13b-ps  | SLC22A13 | 0           | 0.118580089 | 1.279084186 | 0.971349492 | 0.850233301 | 0.363810808 | 0.388291761 | 0.690824524 | 1.021392516 | 1.372538255 |
| ENSMUSG00000025499 | -0.14937028  | 5.818600784  | 0.189144147 | 0.663629893 | 0.999071534 | Hras          | Hras          | HRAS     | 112.0073335 | 55.85122183 | 44.09474432 | 48.35932826 | 48.79031095 | 91.38927487 | 91.44270969 | 27.14940379 | 21.99922343 | 38.69250699 |
| ENSMUSG00000022791 | -0.101467605 | 6.110157677  | 0.189072276 | 0.663689879 | 0.999071534 | Tnk2          | Tnk2          | TNK2     | 81.82991911 | 65.87123934 | 81.86138794 | 62.92957064 | 78.81008672 | 112.1992531 | 42.19437135 | 56.92394077 | 48.24115423 | 70.71839959 |
| ENSMUSG00000045410 | 0.11660162   | 4.387373481  | 0.189039295 | 0.66371741  | 0.999071534 | Akr1e1        | Akr1e1        | AKR1E2   | 18.31698875 | 15.41541155 | 20.1960661  | 25.74076153 | 23.47951961 | 16.0804377  | 21.74433861 | 23.211704   | 17.36367278 | 24.70568858 |
| ENSMUSG00000030427 | 0.264478413  | 1.052304856  | 0.188708163 | 0.663993984 | 0.999071534 | Lilra6        | Lilra6        | LILRA4   | 4.070441945 | 1.304380977 | 1.413724627 | 0.416292639 | 2.092881971 | 3.492583753 | 2.459181152 | 0.690824524 | 1.807079067 | 2.0261279   |
| ENSMUSG00000087235 | -0.242957474 | 0.737990062  | 0.188647843 | 0.664044397 | 0.999071534 | Gm4750        | Gm4750        |          | 1.754500839 | 1.422961066 | 2.760129034 | 0.832585279 | 1.896674286 | 2.110102684 | 1.164875283 | 1.657978857 | 0.707117896 | 1.30717929  |
| ENSMUSG00000087569 | -0.242957999 | 0.737990062  | 0.18862793  | 0.664061041 | 0.999071534 | Gm8464        | Gm8464        |          | 1.754500839 | 1.422961066 | 2.760129034 | 0.832585279 | 1.896674286 | 2.110102684 | 1.164875283 | 1.657978857 | 0.707117896 | 1.30717929  |
| ENSMUSG00000089824 | 0.102759542  | 4.972302781  | 0.188314752 | 0.664322951 | 0.999071534 | Rbm12         | Rbm12         | RBM12    | 32.49335553 | 24.9611087  | 33.45814951 | 37.25819122 | 27.73068612 | 50.42417793 | 32.81065379 | 25.42234248 | 19.2493205  | 33.20235397 |
| ENSMUSG00000064347 | -0.40244545  | 0.536219958  | 0.188275078 | 0.66435615  | 0.999071534 | mt-Ta         | mt-Ta         |          | 1.965040939 | 0           | 3.433331237 | 1.942698983 | 0.457817931 | 1.091432423 | 0.970729402 | 0.621742072 | 2.435628308 | 0.065358965 |
| ENSMUSG00000026496 | 0.123201468  | 5.325982498  | 0.18819968  | 0.664419251 | 0.999071534 | Parp1         | Parp1         | PARP1    | 49.26638355 | 36.46337731 | 35.14115502 | 27.75284262 | 51.40641341 | 87.09630734 | 44.07111486 | 22.86629174 | 24.90626367 | 33.07163604 |
| ENSMUSG00000036295 | -0.257170483 | 0.696551357  | 0.188172019 | 0.664442405 | 0.999071534 | Lrrn3         | Lrrn3         | LRRN3    | 2.38612114  | 1.541541155 | 1.077123525 | 2.358991623 | 0.981038424 | 2.255627007 | 1.876743511 | 1.105319238 | 0.392843275 | 1.176461361 |
| ENSMUSG00000032431 | -0.0936461   | 6.393507545  | 0.18814833  | 0.664462235 | 0.999071534 | Crtap         | Crtap         | CRTAP    | 77.89983723 | 98.06573345 | 89.26661217 | 95.4003965  | 88.42426328 | 105.2868477 | 96.2316414  | 74.74721349 | 47.21976171 | 76.92750122 |
| ENSMUSG00000068245 | -0.149292739 | 3.447923369  | 0.187998266 | 0.664587891 | 0.999071534 | Phf11d        | Phf11d        | PHF11    | 8.983044293 | 14.40748079 | 13.39672385 | 10.40731598 | 11.64165596 | 11.13261071 | 6.406814054 | 16.37254122 | 8.092571475 | 7.189486096 |
| ENSMUSG00000034083 | 0.12278095   | 4.405667624  | 0.187984455 | 0.664599459 | 0.999071534 | Ccdc174       | Ccdc174       | CCDC174  | 14.80798708 | 21.34441599 | 20.59998742 | 21.57783514 | 26.2264272  | 15.93491337 | 15.07866338 | 24.80060041 | 21.99922343 | 25.62071409 |
| ENSMUSG00000014769 | -0.125481308 | 8.241254722  | 0.187982072 | 0.664601455 | 0.999071534 | Psmb1         | Psmb1         | PSMB1    | 430.6948658 | 324.1979628 | 287.7266217 | 314.8559995 | 282.3428584 | 299.6345811 | 465.0440989 | 209.1816658 | 196.5002064 | 238.1680667 |
| ENSMUSG00000030148 | 0.190875665  | 4.126440628  | 0.187760193 | 0.664787364 | 0.999071534 | Clec4a2       | Clec4a2       | CLEC4A   | 24.21211157 | 14.05174052 | 15.07972936 | 12.21125075 | 18.96674286 | 31.65154026 | 40.77063489 | 6.770080335 | 4.556981996 | 10.78422914 |
| ENSMUSG00000080848 | 0.148046392  | 6.695970374  | 0.187757176 | 0.664789893 | 0.999071534 | Gm9385        | Gm9385        |          | 97.12916642 | 126.1099245 | 79.84178133 | 85.33999106 | 123.4146337 | 90.5888911  | 182.8207041 | 151.2905707 | 29.30610835 | 80.58760323 |
| ENSMUSG00000041552 | -0.314937911 | 0.893586997  | 0.187570049 | 0.664946787 | 0.999071534 | Ptchd1        | Ptchd1        | PTCHD1   | 2.666841275 | 2.01586151  | 1.009803305 | 1.457024238 | 2.87771271  | 3.056010784 | 0.776583522 | 0.552659619 | 2.907040239 | 0.065358965 |
| ENSMUSG00000030942 | -0.103870455 | 5.006479803  | 0.187562337 | 0.664953255 | 0.999071534 | Thumpd1       | Thumpd1       | THUMPD1  | 30.73885469 | 39.7836198  | 30.09213849 | 29.90368792 | 42.11924967 | 53.98952385 | 30.61033382 | 27.63298096 | 18.62077126 | 23.65994515 |
| ENSMUSG00000029009 | -0.130342915 | 3.783050708  | 0.18753687  | 0.664974615 | 0.999071534 | Mthfr         | Mthfr         | MTHFR    | 13.54474647 | 14.2889007  | 17.97449883 | 13.18260024 | 14.97718661 | 14.84348095 | 6.795105815 | 14.23098519 | 11.47102364 | 15.35935666 |
| ENSMUSG00000014547 | 0.414824519  | 1.211087035  | 0.187316219 | 0.665159756 | 0.999071534 | Wdfy2         | Wdfy2         | WDFY2    | 4.421342113 | 3.913142931 | 0           | 0           | 1.504258917 | 4.438491853 | 4.141778783 | 1.934308667 | 0.15713731  | 2.091486864 |

|                    |              |              |             |             |             |               |               |           |             |             |             |             |             |             |             |             |             |             |
|--------------------|--------------|--------------|-------------|-------------|-------------|---------------|---------------|-----------|-------------|-------------|-------------|-------------|-------------|-------------|-------------|-------------|-------------|-------------|
| ENSMUSG00000026933 | -0.099883951 | 4.892428731  | 0.18715084  | 0.665298604 | 0.999071534 | Camsap1       | Camsap1       | CAMSAP1   | 32.70389563 | 29.82289234 | 30.56338004 | 36.28684173 | 28.97333479 | 40.23747532 | 19.99702569 | 28.25472303 | 20.11357571 | 31.63373882 |
| ENSMUSG00000030536 | -0.111917223 | 8.106004532  | 0.186921862 | 0.665490969 | 0.999071534 | lqgap1        | lqgap1        | IQGAP1    | 283.6676956 | 399.0219989 | 266.2514715 | 263.0275659 | 275.1485766 | 391.3149047 | 233.6869248 | 235.9165749 | 208.9926226 | 230.128914  |
| ENSMUSG00000060073 | 0.148006296  | 7.827368318  | 0.18688429  | 0.665522546 | 0.999071534 | Psma3         | Psma3         | PSMA3     | 239.3139144 | 119.5880196 | 290.8233519 | 305.420033  | 152.9765916 | 169.1720255 | 227.1506801 | 158.0606511 | 297.6966342 | 259.7365249 |
| ENSMUSG00000038000 | -0.116834453 | 4.230996616  | 0.186878681 | 0.665527261 | 0.999071534 | Ac d          | Ac d          | ACD       | 18.73806896 | 26.20619963 | 16.62809442 | 16.58232347 | 22.89089656 | 26.8492376  | 16.76126101 | 20.72473572 | 9.821081887 | 14.64040805 |
| ENSMUSG00000029319 | 0.1205116    | 4.527992303  | 0.186829514 | 0.66556859  | 0.999071534 | Coq2          | Coq2          | COQ2      | 32.56353556 | 17.31269297 | 21.94639183 | 23.72868044 | 18.50892493 | 25.83056734 | 35.59341141 | 16.16529386 | 18.07079067 | 20.39199693 |
| ENSMUSG00000015970 | 0.675189574  | -1.003188458 | 0.186818786 | 0.665577609 | 0.999071534 | Chdh          | Chdh          | CHDH      | 1.263240604 | 0.118580089 | 0           | 0           | 0.065402562 | 2.037340523 | 0           | 0           | 0           | 0.457512752 |
| ENSMUSG00000034641 | -0.14381817  | 3.692260728  | 0.186745011 | 0.665639637 | 0.999071534 | Cd300Id       | Cd300Id       | CD300LF   | 16.56248792 | 17.13482283 | 13.12744297 | 8.395234892 | 14.97718661 | 14.69795663 | 20.57946333 | 9.602460883 | 7.385453579 | 7.450921954 |
| ENSMUSG00000034157 | 0.100030865  | 4.552961585  | 0.186629654 | 0.665736657 | 0.999071534 | Z310044G17Rik | Cipc          | CIPC      | 21.61545033 | 24.78323856 | 25.85096461 | 24.00620887 | 20.47100178 | 26.55818896 | 22.06791508 | 25.00784777 | 19.09218319 | 24.05209894 |
| ENSMUSG00000067274 | -0.12331518  | 10.99388073  | 0.186581202 | 0.665777417 | 0.999071534 | Rplp0         | Rplp0         | RPLP0     | 2789.235253 | 2467.295908 | 1811.78909  | 1960.668949 | 2035.65473  | 1957.957004 | 3068.152064 | 1688.375137 | 1112.375019 | 1709.26764  |
| ENSMUSG00000049502 | -0.131909694 | 4.757028611  | 0.18652061  | 0.6658284   | 0.999071534 | Dtx3l         | Dtx3l         | DTXL      | 26.73859278 | 43.28173242 | 25.71632417 | 16.58232347 | 34.79416277 | 31.5787781  | 11.00159989 | 29.91270189 | 23.72773384 | 27.51612406 |
| ENSMUSG00000073985 | -0.404191421 | -0.311879392 | 0.186434386 | 0.665900965 | 0.999071534 | Gm10602       | Gm10602       |           | 2.035220973 | 1.007930755 | 0.06732022  | 0           | 0.915635862 | 0.727621615 | 0.517722348 | 0.621742072 | 0.235705965 | 0.71894861  |
| ENSMUSG00000026511 | 0.125331014  | 6.728022298  | 0.186268185 | 0.666040895 | 0.999071534 | Srp9          | Srp9          | SRP9      | 93.76052481 | 59.9422349  | 148.5084061 | 125.026556  | 95.42233737 | 83.74924791 | 93.70774496 | 102.3801944 | 132.6238898 | 103.5285998 |
| ENSMUSG00000045257 | 0.165779431  | 2.963630244  | 0.186135006 | 0.666153077 | 0.999071534 | Morn2         | Morn2         | MORN2     | 8.491784059 | 5.217523908 | 9.492151068 | 6.521918016 | 7.848307392 | 4.365729691 | 7.312828163 | 6.977327692 | 9.035395336 | 10.1306395  |
| ENSMUSG00000029075 | -0.233397197 | 1.833139057  | 0.186046193 | 0.666227914 | 0.999071534 | Tnfrsf4       | Tnfrsf4       | TNFRSF4   | 2.947561409 | 1.48225111  | 5.92417939  | 5.203657991 | 3.531738326 | 3.638108076 | 1.229590576 | 1.4507315   | 3.221314859 | 5.620870947 |
| ENSMUSG00000020520 | -0.11614196  | 4.949767646  | 0.186040611 | 0.666232618 | 0.999071534 | Galnt10       | Galnt10       | GALNT10   | 41.19567969 | 41.44374104 | 23.1581558  | 31.49947637 | 29.16954247 | 48.38683741 | 36.56414082 | 16.85611838 | 17.12796681 | 28.8886231  |
| ENSMUSG00000087365 | 0.165977028  | 2.915197403  | 0.185835359 | 0.666405655 | 0.999071534 | C430049B03Rik | C430049B03Rik |           | 5.123142449 | 5.454684085 | 10.77123525 | 6.868828548 | 7.979112515 | 7.057929668 | 4.465355525 | 9.464295978 | 8.092571475 | 8.039152634 |
| ENSMUSG00000015133 | -0.10274717  | 4.949102933  | 0.185785017 | 0.666448113 | 0.999071534 | Lrrk1         | Lrrk1         | LRRK1     | 34.03731627 | 39.54645962 | 28.74573409 | 30.18121635 | 33.02829361 | 44.89425366 | 19.67344922 | 23.83344608 | 29.07040239 | 27.05861131 |
| ENSMUSG00000022101 | 0.372877004  | 0.434332664  | 0.185613724 | 0.66659263  | 0.999071534 | Fgf17         | Fgf17         | FGF17     | 0.98252047  | 0.059290044 | 2.356207712 | 0.624438959 | 1.569661478 | 0.291048646 | 0.129430587 | 1.243484143 | 2.121353688 | 2.483640651 |
| ENSMUSG00000009376 | 0.107896701  | 7.225185152  | 0.185480121 | 0.666705403 | 0.999071534 | Met           | Met           | MET       | 108.4983319 | 144.9048685 | 137.804491  | 159.0237882 | 196.0768797 | 186.925993  | 173.9547089 | 114.3314587 | 136.3166166 | 139.8028251 |
| ENSMUSG00000040843 | -0.110067641 | 5.745579139  | 0.185460105 | 0.666722303 | 0.999071534 | Tiprl         | Tiprl         | TIPRL     | 69.12733304 | 69.25077187 | 43.55618256 | 49.05314933 | 58.46989007 | 56.46343734 | 78.24078982 | 44.42001689 | 22.3920667  | 52.4832485  |
| ENSMUSG00000040907 | -0.152687548 | 3.672259444  | 0.185459958 | 0.666722427 | 0.999071534 | Atp1a3        | Atp1a3        | ATP1A3    | 16.42212785 | 19.98074497 | 15.2143698  | 8.187088573 | 9.483371431 | 17.9722539  | 6.471529348 | 17.54694291 | 7.778296855 | 9.084896066 |
| ENSMUSG00000027460 | -0.166145815 | 2.870983989  | 0.185344893 | 0.666819598 | 0.999071534 | Angpt4        | Angpt4        | ANGPT4    | 5.895122818 | 9.189956883 | 12.79084186 | 5.064893778 | 6.54025616  | 6.548594537 | 4.724216424 | 8.773471454 | 5.971217787 | 6.339819557 |
| ENSMUSG00000082204 | -0.307741966 | 0.052930692  | 0.185344021 | 0.666820335 | 0.999071534 | Gm7722        | Gm7722        |           | 1.333420637 | 0.415030311 | 0.807842644 | 1.80393477  | 0.784830739 | 0.436572969 | 1.359021163 | 0.483577167 | 0.471411931 | 1.111102397 |
| ENSMUSG00000041684 | 0.136570882  | 4.010472875  | 0.185276367 | 0.666877484 | 0.999071534 | Bivm          | Bivm          | BIVM      | 18.52752886 | 21.46299608 | 11.17515658 | 13.52951078 | 14.58477124 | 17.53568093 | 28.53944442 | 11.74401691 | 12.2567102  | 11.24174189 |
| ENSMUSG00000031148 | -0.10602564  | 5.265009646  | 0.185103276 | 0.667023757 | 0.999071534 | Gpkow         | Gpkow         | GPKOW     | 46.95044244 | 53.77607028 | 33.12154841 | 32.26267955 | 41.00740612 | 46.78606986 | 50.47792891 | 37.23544184 | 18.77790857 | 29.0847392  |
| ENSMUSG00000060923 | -0.179186418 | 2.584001322  | 0.18509552  | 0.667030313 | 0.999071534 | Acyp2         | Acyp2         | ACYP2     | 5.193322482 | 3.616692709 | 7.270583797 | 9.782877023 | 6.14784079  | 5.23887563  | 6.406814054 | 4.283112048 | 6.599767028 | 3.464025119 |
| ENSMUSG00000031642 | -0.128010044 | 3.817255969  | 0.18503863  | 0.667078408 | 0.999071534 | Sh3rf1        | Sh3rf1        | SH3RF1    | 10.52700503 | 16.18618212 | 15.28169002 | 12.6969255  | 21.19042996 | 16.73529715 | 8.9307105   | 14.92180972 | 9.899650542 | 14.50969012 |
| ENSMUSG00000040345 | -0.098769876 | 5.333783938  | 0.185008473 | 0.667103906 | 0.999071534 | Arhgap9       | Arhgap9       | ARHGAP9   | 53.8208573  | 44.64540344 | 39.44964912 | 34.20537853 | 44.60454701 | 51.00627523 | 52.03109596 | 32.05425791 | 21.21353688 | 35.68599462 |
| ENSMUSG00000033228 | -0.104560551 | 7.094302829  | 0.184910956 | 0.667186374 | 0.999071534 | Scaf11        | Scaf11        | SCAF11    | 111.5160733 | 160.9131805 | 159.0103604 | 143.6209606 | 158.6666144 | 174.1198525 | 93.51359908 | 134.9180295 | 119.2672184 | 115.8160851 |
| ENSMUSG00000038751 | 0.408694136  | -0.643114394 | 0.184779878 | 0.667297265 | 0.999071534 | Ptk6          | Ptk6          | PTK6      | 0.350900168 | 0.355740266 | 1.077123525 | 0.20814632  | 0.261610246 | 0.072762162 | 0.258861174 | 0.345412262 | 0.235705965 | 1.830051006 |
| ENSMUSG00000020376 | -0.096163195 | 6.799233571  | 0.184431405 | 0.667592298 | 0.999071534 | Rnf130        | Rnf130        | RNF130    | 133.903504  | 121.1888508 | 100.4417687 | 125.1653202 | 115.6317289 | 109.3615288 | 133.9606575 | 102.4492769 | 83.59704902 | 89.86857619 |
| ENSMUSG00000042312 | -0.122105048 | 6.182621574  | 0.184357373 | 0.667655502 | 0.999071534 | S100a13       | S100a13       | S100A13   | 74.74173572 | 56.2069621  | 81.25550595 | 112.3990126 | 64.22531549 | 45.03977798 | 51.96638066 | 69.63511201 | 70.79035824 | 88.43067898 |
| ENSMUSG00000026303 | 0.253167654  | 1.437841264  | 0.184313433 | 0.667692254 | 0.999071534 | Mlph          | Mlph          | MLPH      | 0.561440268 | 2.727342043 | 3.702612119 | 1.248877918 | 3.989556257 | 5.529924276 | 1.48845175  | 3.039627905 | 0.864255206 | 3.33330719  |
| ENSMUSG00000021311 | 0.163544903  | 3.29161713   | 0.184200433 | 0.667788031 | 0.999071534 | Mtr           | Mtr           | MTR       | 11.5095255  | 9.189956883 | 9.357510628 | 7.007592761 | 10.46440986 | 19.93683226 | 10.09558578 | 6.148338263 | 3.142746204 | 12.94107497 |
| ENSMUSG00000015335 | 0.135028688  | 4.271732014  | 0.184060475 | 0.667906707 | 0.999071534 | Zdhc12        | Zdhc12        | ZDHHC12   | 21.26455016 | 7.233385418 | 20.93658853 | 21.99412778 | 23.28331193 | 16.73529715 | 17.99085159 | 20.93198308 | 17.75651605 | 22.22204793 |
| ENSMUSG00000027894 | 0.218115825  | 3.299085196  | 0.184041514 | 0.667922789 | 0.999071534 | Slc6a17       | Slc6a17       | SLC6A17   | 8.140883891 | 17.4905631  | 2.086926831 | 10.26855177 | 8.567735569 | 13.97033501 | 17.08483748 | 14.23098519 | 2.907040239 | 3.986896835 |
| ENSMUSG00000025544 | 0.113913423  | 8.112738389  | 0.184026469 | 0.66793555  | 0.999071534 | Tm9sf2        | Tm9sf2        | TM9SF2    | 234.9627523 | 237.2787577 | 303.6141937 | 312.1500974 | 286.9210377 | 288.3564461 | 345.4502366 | 225.7614544 | 270.5118795 | 247.5143986 |
| ENSMUSG00000031950 | 0.115267809  | 6.844426271  | 0.183993929 | 0.667963152 | 0.999071534 | Gabarapl2     | Gabarapl2     | GABARAPL2 | 151.1677922 | 105.9513094 | 80.64962397 | 123.5695318 | 110.6611342 | 98.95653967 | 182.2382664 | 86.90572511 | 80.92571475 | 127.3846218 |
| ENSMUSG00000093587 | 0.313962928  | 0.410554858  | 0.183965779 | 0.667987034 | 0.999071534 | Gm20554       | Gm20554       |           | 1.824680872 | 0.474320355 | 1.211763966 | 0.901967385 | 1.177246109 | 1.45524323  | 0.129430587 | 2.832380548 | 1.335667137 | 0.588230681 |

|                     |              |              |             |             |             |               |               |            |             |             |             |             |             |             |             |             |             |             |
|---------------------|--------------|--------------|-------------|-------------|-------------|---------------|---------------|------------|-------------|-------------|-------------|-------------|-------------|-------------|-------------|-------------|-------------|-------------|
| ENSMUSG00000073481  | 0.104629942  | 6.567356975  | 0.18393652  | 0.668011857 | 0.999071534 | 2-Mar         | 2-Mar         | 2-Mar      | 99.7960077  | 75.47622653 | 95.86399377 | 111.4276631 | 89.47070426 | 72.32558855 | 101.8618719 | 93.81397035 | 102.6106636 | 91.30647341 |
| ENSMUSG00000042369  | 0.100000768  | 4.902768968  | 0.183893278 | 0.668048549 | 0.999071534 | Rbm45         | Rbm45         | RBM45      | 30.10723439 | 28.22206114 | 27.60129034 | 29.83430582 | 33.48611154 | 36.01726995 | 38.82917609 | 21.34647779 | 28.67755911 | 23.92138101 |
| ENSMUSG00000040229  | -0.164010205 | 3.748138572  | 0.183745849 | 0.668173685 | 0.999071534 | Gpr34         | Gpr34         | GPR34      | 10.456825   | 14.11103057 | 12.5888812  | 21.57783514 | 13.60373281 | 20.15511874 | 21.42076214 | 5.457513739 | 4.949825271 | 11.37245982 |
| ENSMUSG00000022969  | -0.092567293 | 5.322049957  | 0.183734194 | 0.66818358  | 0.999071534 | Il10rb        | Il10rb        | AP000295.9 | 42.95018053 | 42.92599215 | 42.54637926 | 35.73178487 | 50.09836218 | 50.35141577 | 46.14200425 | 39.16975051 | 24.35628308 | 29.67296989 |
| ENSMUSG00000039428  | 0.097153305  | 4.672292191  | 0.183715246 | 0.668199668 | 0.999071534 | Tmem135       | Tmem135       | TMEM135    | 22.1768906  | 26.02832949 | 25.31240285 | 26.64272891 | 26.88045282 | 29.25038893 | 29.96318088 | 22.03730231 | 22.47063536 | 22.94099654 |
| ENSMUSG00000028013  | 0.101863957  | 5.728444143  | 0.183651877 | 0.668253479 | 0.999071534 | Ppa2          | Ppa2          | PPA2       | 61.68824948 | 40.02077997 | 56.95290641 | 61.54192851 | 43.68891115 | 59.3739238  | 76.4287616  | 38.13351372 | 44.15558417 | 47.12381341 |
| ENSMUSG00000042487  | 0.108775181  | 5.085403532  | 0.183642245 | 0.668261659 | 0.999071534 | Leo1          | Leo1          | LEO1       | 23.2295911  | 31.30514345 | 37.76664361 | 38.36830492 | 37.60647292 | 35.87174563 | 22.58563742 | 37.51177165 | 37.71295445 | 32.94091811 |
| ENSMUSG00000045252  | 0.18047394   | 3.164277593  | 0.183420592 | 0.668449969 | 0.999071534 | Zfp574        | Zfp574        | ZNF574     | 8.561964092 | 10.49433786 | 5.049016526 | 6.452535909 | 12.68809695 | 20.59169171 | 8.865995207 | 9.118883716 | 2.435628308 | 7.450921954 |
| ENSMUSG00000035863  | -0.119625105 | 6.860166608  | 0.183134112 | 0.668693555 | 0.999071534 | Palm          | Palm          | PALM       | 100.7785282 | 106.1884695 | 154.903827  | 124.8184097 | 139.7652741 | 92.33518297 | 58.37319472 | 124.9010739 | 105.0462919 | 146.5347984 |
| ENSMUSG00000026701  | -0.105949835 | 8.209012973  | 0.183005459 | 0.668803019 | 0.999071534 | Prdx6         | Prdx6         | PRDX6      | 335.3202003 | 298.0510532 | 306.8455643 | 333.1728756 | 316.6792032 | 326.7021052 | 298.0786418 | 280.3365918 | 196.0287945 | 287.252649  |
| ENSMUSG00000034371  | 0.1517713    | 2.832261296  | 0.182943378 | 0.668855856 | 0.999071534 | Dak           | Tkfc          | TKFC       | 5.684582717 | 7.52983564  | 6.328100712 | 7.562649614 | 7.194281776 | 11.56918368 | 5.436084652 | 8.497141644 | 4.714119306 | 6.209101628 |
| ENSMUSG00000053580  | -0.157055268 | 6.322189799  | 0.182810771 | 0.668968754 | 0.999071534 | Tanc2         | Tanc2         | TANC2      | 47.16098254 | 81.22736084 | 107.1737908 | 111.1501347 | 87.37782229 | 47.73197796 | 26.14497857 | 67.97713316 | 106.9319396 | 97.90772883 |
| ENSMUSG00000074215  | 0.356675404  | -0.357429321 | 0.182788981 | 0.668987309 | 0.999071534 | Gm10643       | Gm10643       |            | 0.210540101 | 0.5336104   | 0.807842644 | 0.277528426 | 1.111843547 | 0.363810808 | 0.647152935 | 1.174401691 | 0.078568655 | 1.241820326 |
| ENSMUSG00000026142  | 0.113535656  | 4.274649841  | 0.182655046 | 0.669101395 | 0.999071534 | Rhbdd1        | Rhbdd1        | RHBDD1     | 16.98356812 | 26.73981003 | 14.20456649 | 17.34552664 | 20.73261203 | 20.8099782  | 20.64417862 | 23.34986891 | 16.42084892 | 14.96720287 |
| ENSMUSG00000034810  | 0.655165723  | -0.901173179 | 0.182652087 | 0.669103916 | 0.999071534 | Scn7a         | Scn7a         | SCN7A      | 1.19306057  | 0.355740266 | 0           | 0           | 0.065402562 | 0.582097292 | 1.876743511 | 0           | 0           | 0           |
| ENSMUSG00000041912  | 0.343341901  | 0.223978981  | 0.18245844  | 0.669268953 | 0.999071534 | Tdrkh         | Tdrkh         | TDRKH      | 1.403600671 | 0.770770577 | 0.201960661 | 0.901967385 | 1.438856355 | 2.255627007 | 1.941458804 | 0.828989429 | 0           | 0.915025503 |
| ENSMUSG00000050144  | -0.121616195 | 3.966348717  | 0.182371462 | 0.669343115 | 0.999071534 | Slc25a44      | Slc25a44      | SLC25A44   | 16.21158775 | 20.39577528 | 14.8777687  | 14.57024238 | 17.98570444 | 26.63095112 | 12.68419752 | 13.40199576 | 8.249708785 | 13.59466462 |
| ENSMUSG00000031516  | 0.104899504  | 5.632230893  | 0.182370797 | 0.669343682 | 0.999071534 | Dctn6         | Dctn6         | DCTN6      | 41.89748002 | 35.75189678 | 54.52937848 | 60.4318148  | 53.63010051 | 43.36624827 | 41.02949607 | 44.62726425 | 55.70517646 | 57.18909394 |
| ENSMUSG00000029576  | -0.302398612 | 0.540114754  | 0.182350313 | 0.66936115  | 0.999071534 | Radil         | Radil         | RADIL      | 3.579181711 | 1.067220799 | 0.269280881 | 1.110113705 | 1.63506404  | 1.164194584 | 0.258861174 | 1.243484143 | 1.257098482 | 1.699333077 |
| ENSMUSG00000023990  | -0.12260918  | 3.686341864  | 0.182251078 | 0.669445794 | 0.999071534 | Tfeb          | Tfeb          | Tfeb       | 16.70284798 | 10.67220799 | 12.5888812  | 12.90507182 | 16.21983528 | 13.38823772 | 10.28973166 | 14.78364481 | 8.485414751 | 12.22212636 |
| ENSMUSG00000027628  | -0.163933766 | 3.667578714  | 0.182214578 | 0.669476934 | 0.999071534 | Aar2          | Aar2          | AAR2       | 19.51004932 | 20.87009563 | 7.270583797 | 10.26855177 | 11.44544828 | 18.40882687 | 18.63800452 | 9.049801264 | 4.00700141  | 9.673126747 |
| ENSMUSG00000037190  | 0.137851193  | 3.624351685  | 0.182082087 | 0.66959     | 0.999071534 | Cyb561d2      | Cyb561d2      | CYB561D2   | 12.1411458  | 12.21374915 | 10.29999371 | 10.47669809 | 15.36960198 | 15.57110257 | 21.22661626 | 7.944482025 | 7.385453579 | 10.84958811 |
| ENSMUSG000000008301 | -0.091242332 | 5.538736293  | 0.182034813 | 0.669630355 | 0.999071534 | Phax          | Phax          | PHAX       | 35.51109697 | 49.50718708 | 58.16467038 | 54.81186417 | 49.31353144 | 48.67788606 | 42.45323252 | 42.00213106 | 37.24154252 | 46.27414687 |
| ENSMUSG00000028098  | -0.102093814 | 5.887757218  | 0.181807944 | 0.669824104 | 0.999071534 | Rnf115        | Rnf115        | RNF115     | 41.82729999 | 59.70507472 | 70.8208718  | 65.7048549  | 78.94089185 | 55.00819411 | 41.676649   | 73.43464689 | 46.04123189 | 57.12373498 |
| ENSMUSG00000055254  | -0.418240069 | -0.434283146 | 0.181266537 | 0.670287051 | 0.999071534 | Ntrk2         | Ntrk2         | NTRK2      | 0.491260235 | 0.177870133 | 1.817645949 | 0.832585279 | 0.261610246 | 1.45524323  | 0.129430587 | 0.414494714 | 0.628549241 | 0           |
| ENSMUSG00000037706  | -0.107742534 | 7.836893988  | 0.18124304  | 0.67030716  | 0.999071534 | Cd81          | Cd81          | CD81       | 200.1534557 | 259.3346542 | 227.8116256 | 246.792153  | 296.273604  | 202.715382  | 217.8316779 | 245.7262832 | 169.708295  | 220.8479411 |
| ENSMUSG00000022672  | -0.126775124 | 3.594750949  | 0.181232611 | 0.670316087 | 0.999071534 | Prkdc         | Prkdc         | PRKDC      | 12.21132584 | 10.19788764 | 16.08953266 | 9.85225913  | 16.61225065 | 16.00767553 | 11.00159989 | 8.635306549 | 9.663944577 | 10.52279329 |
| ENSMUSG00000035539  | -0.292002191 | 0.000350254  | 0.181216114 | 0.670330208 | 0.999071534 | E230008N13Rik | Ccdc180       | CCDC180    | 0.912340436 | 1.126510844 | 1.009803305 | 1.110113705 | 0.784830739 | 0.509335131 | 0.388291761 | 0.483577167 | 1.021392516 | 1.241820326 |
| ENSMUSG00000026181  | -0.123761646 | 4.849682558  | 0.181207458 | 0.670337617 | 0.999071534 | Ppm1f         | Ppm1f         | PPM1F      | 35.72163707 | 44.76398353 | 21.81175139 | 22.96547727 | 30.93541163 | 51.73389684 | 33.26366085 | 17.13244819 | 17.12796681 | 19.1501766  |
| ENSMUSG00000051586  | -0.13354269  | 4.840591881  | 0.181195524 | 0.670347833 | 0.999071534 | Mical3        | Mical3        | MICAL3     | 22.1768906  | 37.70486424 | 33.86207083 | 28.23851737 | 32.89748848 | 24.66637276 | 10.74273872 | 42.69295558 | 20.66355629 | 31.37230296 |
| ENSMUSG00000045038  | -0.157422549 | 4.155630356  | 0.181172722 | 0.670367353 | 0.999071534 | Prkce         | Prkce         | PRKCE      | 14.73780704 | 14.70393101 | 27.39932968 | 26.64272891 | 12.36108414 | 16.51701067 | 7.506974044 | 10.50053276 | 20.74212495 | 23.59458619 |
| ENSMUSG00000032449  | 0.10370364   | 5.379893171  | 0.181075717 | 0.670450411 | 0.999071534 | Slc25a36      | Slc25a36      | SLC25A36   | 37.82703808 | 40.55439037 | 41.73853661 | 43.84949134 | 43.4273009  | 37.2542267  | 34.62268201 | 65.83557713 | 30.24893221 | 38.23499424 |
| ENSMUSG00000033227  | -0.280560305 | 0.697908106  | 0.18107484  | 0.670451162 | 0.999071534 | Wnt6          | Wnt6          | WNT6       | 1.614140771 | 1.422961066 | 1.346404407 | 2.775284262 | 1.24264867  | 1.164194584 | 0.258861174 | 3.108710358 | 1.021392516 | 0.849666539 |
| ENSMUSG00000057093  | 0.259250734  | 1.381615105  | 0.181028277 | 0.670491041 | 0.999071534 | C030039L03Rik | C030039L03Rik | ZNF780B    | 0.771980369 | 2.430891821 | 2.962089695 | 1.665170557 | 3.924153696 | 0.582097292 | 1.48845175  | 3.523205072 | 3.614158135 | 3.071871332 |
| ENSMUSG00000042558  | 0.097239687  | 4.816629803  | 0.181017143 | 0.670500577 | 0.999071534 | Adprhl2       | Adprhl2       | ADPRHL2    | 29.33525402 | 26.26548967 | 29.95749805 | 29.41801318 | 25.44159646 | 31.28772945 | 27.63343032 | 21.48464269 | 28.28471584 | 30.39191849 |
| ENSMUSG00000026421  | -0.181119534 | 7.762309699  | 0.180767942 | 0.670714113 | 0.999071534 | Csrp1         | Csrp1         | CSRP1      | 287.2468773 | 455.6439913 | 99.16268456 | 114.4804758 | 253.8927441 | 293.0132245 | 374.5074034 | 182.0322621 | 70.24037766 | 102.2214205 |
| ENSMUSG00000027002  | 0.093744202  | 6.801924855  | 0.180721905 | 0.67075358  | 0.999071534 | Nckap1        | Nckap1        | NCKAP1     | 107.4456314 | 127.5328855 | 99.36464522 | 96.09421757 | 130.8705258 | 137.8115339 | 134.284234  | 115.5058604 | 78.72579241 | 95.62016507 |
| ENSMUSG00000050714  | 0.127134286  | 3.693454764  | 0.180555935 | 0.670895914 | 0.999071534 | Zbtb26        | Zbtb26        | ZBTB26     | 10.0357448  | 13.63671021 | 10.50195437 | 14.91715291 | 14.25775843 | 11.20537287 | 15.72581632 | 10.29328541 | 10.8424744  | 16.0129463  |
| ENSMUSG00000031737  | -0.12162174  | 4.110599507  | 0.180486522 | 0.670955465 | 0.999071534 | Irx5          | Irx5          | IRX5       | 14.87816711 | 18.91352417 | 18.8496617  | 19.49637194 | 20.40559922 | 14.33414582 | 10.9368846  | 22.72812684 | 15.08518178 | 14.90184391 |

|                      |              |              |             |             |             |               |               |           |             |             |             |             |             |             |             |             |             |             |
|----------------------|--------------|--------------|-------------|-------------|-------------|---------------|---------------|-----------|-------------|-------------|-------------|-------------|-------------|-------------|-------------|-------------|-------------|-------------|
| ENSMUSG00000068854   | 0.23798718   | 1.014927106  | 0.180470763 | 0.670968986 | 0.999071534 | Hist2h2be     | Hist2h2be     | HIST1H2BJ | 1.965040939 | 1.541541155 | 1.211763966 | 2.289609516 | 1.962076848 | 1.382481069 | 4.27120937  | 0.967154334 | 1.649941757 | 1.503256184 |
| ENSMUSG00000042097   | 0.171133698  | 2.549175678  | 0.180428733 | 0.671005052 | 0.999071534 | Zfp239        | Zfp239        | ZNF239    | 6.035482885 | 3.735272798 | 3.635291898 | 7.562649614 | 6.867268968 | 8.731459383 | 7.118682283 | 3.730452429 | 3.78452169  | 7.124127131 |
| ENSMUSG000000037466  | -0.182341364 | 3.333456507  | 0.180387356 | 0.671040564 | 0.999071534 | 4930427A07Rik | 4930427A07Rik | C14orf80  | 15.79050755 | 4.506043375 | 13.66600473 | 9.782877023 | 11.24924059 | 20.37340523 | 10.28973166 | 2.970545453 | 5.578374512 | 8.365947457 |
| ENSMUSG000000035390  | -0.169056865 | 2.933707195  | 0.18034994  | 0.67107268  | 0.999071534 | Brsk1         | Brsk1         | BRSK1     | 7.649623656 | 11.73942879 | 7.607184899 | 5.966861163 | 8.436930446 | 12.80614043 | 4.141778783 | 9.740625788 | 2.907040239 | 6.013024734 |
| ENSMUSG000000083852  | 0.395194021  | -0.143993569 | 0.180203016 | 0.67119883  | 0.999071534 | Gm13007       | Gm13007       |           | 1.403600671 | 1.007930755 | 0.471241542 | 0           | 0.588623054 | 1.164194584 | 1.553167044 | 0.690824524 | 0           | 0.980384468 |
| ENSMUSG000000051502  | -0.275838166 | 0.746084314  | 0.18019841  | 0.671202786 | 0.999071534 | Ufsp1         | Ufsp1         | UFSP1     | 0.912340436 | 0.711480533 | 2.221567271 | 2.497755836 | 2.354492217 | 3.056010784 | 1.359021163 | 1.72706131  | 0.628549241 | 0.326794823 |
| ENSMUSG000000039804  | 0.104082957  | 4.623207834  | 0.180080978 | 0.671303659 | 0.999071534 | Ncoa5         | Ncoa5         | NCOA5     | 27.44039311 | 24.48678834 | 18.91698192 | 23.52053412 | 28.51551686 | 28.45000516 | 18.50857394 | 31.22526848 | 17.91365336 | 27.12397027 |
| ENSMUSG000000058743  | 0.339819191  | -0.170131095 | 0.180003237 | 0.671370459 | 0.999071534 | Kcnj14        | Kcnj14        | KCNJ14    | 0.070180034 | 0.415030311 | 1.211763966 | 1.318260024 | 0.39241537  | 0.873145938 | 0.970729402 | 0.345412262 | 0.785686551 | 1.111102397 |
| ENSMUSG000000062929  | 0.120706173  | 7.273845542  | 0.179937862 | 0.671426647 | 0.999071534 | Cfi2          | Cfi2          | CFI2      | 112.4985938 | 125.2798638 | 162.5783321 | 167.1414947 | 200.197241  | 124.787107  | 122.5707658 | 235.4329978 | 124.609887  | 159.7373092 |
| ENSMUSG000000046865  | 0.112223479  | 6.834539134  | 0.179833695 | 0.671516199 | 0.999071534 | Fbl           | Fbl           | FBL       | 122.5343386 | 73.57894519 | 139.2855359 | 108.721761  | 124.6572824 | 178.7038687 | 140.4969021 | 63.07227904 | 84.85414751 | 119.1493923 |
| ENSMUSG000000074886  | 0.139132945  | 6.204809377  | 0.179783719 | 0.671559175 | 0.999071534 | Grk6          | Grk6          | GRK6      | 112.7091339 | 53.71678023 | 73.31171995 | 52.66101887 | 73.44707667 | 160.6588526 | 100.8264272 | 30.60352641 | 48.39829154 | 52.02573575 |
| ENSMUSG000000029127  | -0.211705313 | 2.267363822  | 0.179703801 | 0.671627913 | 0.999071534 | Zbtb49        | Zbtb49        | ZBTB49    | 4.000261912 | 7.411255551 | 3.837252559 | 5.82809695  | 4.90519212  | 4.656778337 | 3.494625848 | 6.217420715 | 0.549980586 | 6.601255415 |
| ENSMUSG000000033416  | 0.117362728  | 4.663839397  | 0.179686598 | 0.671642711 | 0.999071534 | Gucd1         | Gucd1         | GUCD1     | 30.94939479 | 29.6450222  | 15.41633046 | 20.05142879 | 30.21598346 | 25.46675653 | 39.54104432 | 21.6228076  | 15.16375043 | 26.1435858  |
| ENSMUSG000000063895  | 0.246660348  | 4.451820929  | 0.17964918  | 0.671674903 | 0.999071534 | Nupl1         | Nupl1         | NUP58     | 32.35299546 | 33.20242487 | 6.933982695 | 10.12978756 | 21.84445557 | 43.8755834  | 60.37936882 | 8.22081835  | 3.457020824 | 6.209101628 |
| ENSMUSG000000026000  | -0.111158738 | 4.175734954  | 0.179646066 | 0.671677583 | 0.999071534 | Lanc1l        | Lanc1l        | LANCL1    | 22.1768906  | 21.52228612 | 18.8496617  | 14.15394974 | 20.47100178 | 20.37340523 | 19.73816451 | 19.75758138 | 9.192532646 | 15.62079252 |
| ENSMUSG000000020149  | 0.104552258  | 8.005115598  | 0.179643166 | 0.671680078 | 0.999071534 | Rab1          | Rab1a         | RAB1A     | 231.5239307 | 273.4456848 | 242.285473  | 242.4210803 | 296.2082015 | 281.4440408 | 302.6734276 | 257.8847948 | 201.7643063 | 243.9850145 |
| ENSMUSG000000042743  | 0.204916916  | 2.447242922  | 0.179595724 | 0.671720899 | 0.999071534 | Sgtb          | Sgtb          | SGTB      | 5.75476275  | 7.52983564  | 2.827449254 | 3.677251647 | 6.017035667 | 5.529924276 | 8.542418739 | 9.187966168 | 2.28471584  | 1.633974113 |
| ENSMUSG000000032932  | 0.145029815  | 5.670260245  | 0.179429745 | 0.671863767 | 0.999071534 | Hspa13        | Hspa13        | HSPA13    | 60.35482885 | 77.66995817 | 35.67971678 | 35.73178487 | 42.31545735 | 70.724821   | 106.3272272 | 38.96250315 | 24.90626367 | 24.64032962 |
| ENSMUSG000000084314  | -0.216826501 | 3.632247694  | 0.179397032 | 0.671891934 | 0.999071534 | Rps15a-ps3    | Rps15a-ps3    |           | 27.72111325 | 13.69600026 | 14.81044848 | 3.538487434 | 9.614176555 | 9.531843159 | 11.907614   | 3.937699786 | 21.37067419 | 4.836563373 |
| ENSMUSG000000069439  | 0.247224997  | 1.104732868  | 0.179362322 | 0.671921824 | 0.999071534 | Gm8444        | Gm8444        |           | 3.509001677 | 0.652190488 | 2.490848153 | 1.387642131 | 1.63506404  | 1.528005392 | 1.359021163 | 2.141556024 | 3.457020824 | 1.633974113 |
| ENSMUSG000000043832  | -0.191417926 | 3.063997465  | 0.179298566 | 0.671976736 | 0.999071534 | Clec4a3       | Clec4a3       | CLEC4A    | 13.26402634 | 11.91729893 | 8.011106221 | 4.02416218  | 8.763943254 | 17.31739444 | 10.03087049 | 2.694215643 | 3.299883514 | 6.274460592 |
| ENSMUSG000000002741  | -0.152603196 | 6.69396937   | 0.179250759 | 0.672017919 | 0.999071534 | Ykt6          | Ykt6          | YKT6      | 192.503832  | 114.9041061 | 83.14047212 | 87.00516161 | 90.64795037 | 190.7096253 | 160.3644972 | 44.35093444 | 39.52003351 | 66.33934897 |
| ENSMUSG000000042744  | 0.134373567  | 4.188495286  | 0.179063756 | 0.672179072 | 0.999071534 | Gm15800       | Gm15800       | HECTD4    | 13.33420637 | 22.47092683 | 16.15685288 | 16.929234   | 20.73261203 | 21.97417278 | 7.377543457 | 23.0735391  | 14.84947581 | 24.37889376 |
| ENSMUSG000000022350  | -0.098415748 | 6.491213152  | 0.179023066 | 0.67221415  | 0.999071534 | E430025E21Rik | E430025E21Rik | KIAA0196  | 92.42710417 | 124.7462534 | 82.80387102 | 77.08352038 | 106.9331882 | 125.8057773 | 71.38096871 | 100.6531331 | 49.81252733 | 81.82942356 |
| ENSMUSG000000022702  | -0.095172802 | 5.447038444  | 0.178938957 | 0.672286674 | 0.999071534 | Hira          | Hira          | HIRA      | 44.42396123 | 41.44374104 | 48.40323843 | 53.0079294  | 45.25857262 | 69.34233993 | 36.17584905 | 34.26489639 | 26.00622484 | 43.92122415 |
| ENSMUSG000000056966  | -0.290203552 | 0.647648703  | 0.178705427 | 0.672488145 | 0.999071534 | Gjc3          | Gjc3          | GJC3      | 0.421080201 | 0.592900444 | 2.490848153 | 3.469105327 | 1.046440986 | 0.873145938 | 1.876743511 | 0.690824524 | 1.021392516 | 1.699333077 |
| ENSMUSG000000031832  | 0.128257542  | 3.590077702  | 0.178687852 | 0.672503313 | 0.999071534 | Taf1c         | Taf1c         | TAF1C     | 15.29924731 | 11.68013875 | 11.30979702 | 10.6154623  | 10.26820217 | 15.1345296  | 9.189571674 | 8.980718811 | 10.52819978 | 16.53581802 |
| ENSMUSG000000097015  | 0.295696368  | 1.120214843  | 0.178675587 | 0.672513899 | 0.999071534 | Gm26705       | Gm26705       |           | 1.965040939 | 0.355740266 | 3.635291898 | 2.844666369 | 0.654025616 | 1.382481069 | 0.453007054 | 1.657978857 | 3.78452169  | 3.529384083 |
| ENSMUSG000000030062  | 0.112465893  | 8.173107396  | 0.178674165 | 0.672515127 | 0.999071534 | Rpn1          | Rpn1          | RPN1      | 277.7725728 | 227.8516407 | 356.7971678 | 306.5301467 | 266.2538283 | 356.316305  | 344.8030837 | 213.9483551 | 263.9121125 | 272.481523  |
| ENSMUSG000000040712  | -0.117531782 | 4.586056275  | 0.178597433 | 0.672581365 | 0.999071534 | Camta2        | Camta2        | CAMTA2    | 26.38769261 | 33.26174191 | 19.32090324 | 20.53710354 | 30.08517833 | 30.70563216 | 12.42533635 | 26.113167   | 15.00661312 | 28.1697137  |
| ENSMUSG000000014195  | -0.096082752 | 6.820278116  | 0.178556861 | 0.672616395 | 0.999071534 | Dnajc7        | Dnajc7        | DNAJC7    | 109.2703122 | 106.3663397 | 141.7090638 | 108.2360862 | 140.4847023 | 147.9982365 | 84.45345799 | 97.06084561 | 78.41151779 | 127.3192629 |
| ENSMUSG000000021870  | 0.09116956   | 6.294565761  | 0.178493987 | 0.672670691 | 0.999071534 | Slmap         | Slmap         | SLMAP     | 64.98671106 | 88.10500599 | 67.38754056 | 75.00205718 | 98.95407569 | 100.6300694 | 87.10678502 | 81.44821137 | 61.5978256  | 63.07140075 |
| ENSMUSG000000029607  | 0.338530809  | -0.167346321 | 0.178416278 | 0.672737814 | 0.999071534 | Ankrd61       | Ankrd61       | ANKRD61   | 0.280720134 | 0.296450222 | 1.279084186 | 1.179495811 | 0.39241537  | 0.800383777 | 0.453007054 | 2.003391119 | 0.392843275 | 0.457512752 |
| ENSMUSG0000000027510 | 0.180766805  | 2.527387166  | 0.178409642 | 0.672743546 | 0.999071534 | Rbm38         | Rbm38         | RBM38     | 7.649623656 | 5.158233863 | 2.692808814 | 5.689332737 | 6.278645913 | 11.27813504 | 5.177223478 | 6.217420715 | 4.556981996 | 2.61435858  |
| ENSMUSG000000021187  | -0.320117421 | -0.0158868   | 0.178397652 | 0.672753904 | 0.999071534 | Tc2n          | Tc2n          | TC2N      | 0.631620302 | 0.830060622 | 1.615685288 | 1.595788451 | 0.196207685 | 0.363810808 | 0.647152935 | 1.312566595 | 0.549980586 | 0.71894861  |
| ENSMUSG000000030678  | -0.092958073 | 6.388414248  | 0.178278924 | 0.672856497 | 0.999071534 | Maz           | Maz           | MAZ       | 93.47980468 | 81.76097124 | 84.21759565 | 88.11527532 | 100.85075   | 133.1547556 | 61.73838998 | 66.52640166 | 62.38351215 | 76.73142433 |
| ENSMUSG000000008859  | 0.098139235  | 6.78908912   | 0.178232372 | 0.672896734 | 0.999071534 | Rala          | Rala          | RALA      | 81.90009914 | 103.6389976 | 136.5254069 | 116.2844106 | 113.9966649 | 113.508972  | 99.53212137 | 114.2623763 | 105.1248605 | 113.9206751 |
| ENSMUSG000000037697  | 0.126428124  | 3.825925061  | 0.178210281 | 0.672915829 | 0.999071534 | Ddhd1         | Ddhd1         | DDHD1     | 12.28150587 | 17.78701332 | 17.30129663 | 7.354503294 | 15.43500454 | 16.51701067 | 11.907614   | 15.61263424 | 11.31388633 | 15.68615148 |
| ENSMUSG000000039976  | 0.318995227  | 1.371361048  | 0.178046281 | 0.67305764  | 0.999071534 | Tbc1d16       | Tbc1d16       | TBC1D16   | 3.228281543 | 2.96450222  | 2.692808814 | 0.20814632  | 2.354492217 | 9.750129644 | 1.229590576 | 0.138164905 | 1.571373102 | 1.895409971 |

|                    |              |              |             |             |             |               |               |          |             |             |             |             |             |             |              |             |             |             |
|--------------------|--------------|--------------|-------------|-------------|-------------|---------------|---------------|----------|-------------|-------------|-------------|-------------|-------------|-------------|--------------|-------------|-------------|-------------|
| ENSMUSG00000017652 | -0.218997698 | 2.011484074  | 0.177997282 | 0.673100024 | 0.999071534 | Cd40          | Cd40          | CD40     | 9.544484562 | 5.988294485 | 3.029409915 | 1.248877918 | 2.223687094 | 4.875064822 | 3.947632902  | 3.108710358 | 1.885647722 | 3.986896835 |
| ENSMUSG00000055053 | 0.113693498  | 6.939549275  | 0.177959885 | 0.673132377 | 0.999071534 | Nfic          | Nfic          | NFIC     | 100.497808  | 93.61898012 | 139.4874965 | 107.1953546 | 171.8779319 | 168.9537391 | 68.015777345 | 118.338241  | 114.3173932 | 148.6262853 |
| ENSMUSG00000034765 | -0.105917738 | 5.682762056  | 0.177886349 | 0.673196006 | 0.999071534 | Dusp5         | Dusp5         | DUSP5    | 42.24838019 | 64.44827827 | 75.26400634 | 42.04555657 | 52.06043903 | 55.80857789 | 30.09261147  | 65.35199996 | 39.59860217 | 47.3198903  |
| ENSMUSG00000063800 | 0.215506537  | 4.716814184  | 0.177875353 | 0.673205523 | 0.999071534 | Prpf38a       | Prpf38a       | PRPF38A  | 47.86278288 | 34.74396602 | 9.89607239  | 15.33344555 | 19.03214542 | 43.73005907 | 70.73381577  | 9.187966168 | 7.778296855 | 11.56853672 |
| ENSMUSG00000030220 | -0.241484165 | 4.992085724  | 0.177855665 | 0.673222561 | 0.999071534 | Arhgd1b       | Arhgd1b       | ARHGD1B  | 77.05767683 | 54.84329108 | 11.51175768 | 17.34552664 | 19.55536592 | 76.54579392 | 53.39011712  | 7.806317121 | 7.464022234 | 8.431306421 |
| ENSMUSG00000033386 | 0.100282049  | 5.82156826   | 0.177825374 | 0.673248779 | 0.999071534 | Frrs1         | Frrs1         | FRRS1    | 41.96766006 | 43.16315233 | 67.65682144 | 68.68828548 | 59.71253874 | 52.17046981 | 47.43631012  | 58.51283718 | 54.91948991 | 64.83609279 |
| ENSMUSG00000024997 | 0.098117954  | 5.865019541  | 0.17780217  | 0.673268864 | 0.999071534 | Prdx3         | Prdx3         | PRDX3    | 62.10932968 | 41.08800077 | 62.00192293 | 59.80737585 | 66.44900258 | 66.57737779 | 79.34094981  | 38.82433825 | 53.50525412 | 52.09109471 |
| ENSMUSG00000029405 | 0.106276951  | 7.126073968  | 0.177787906 | 0.673281212 | 0.999071534 | G3bp2         | G3bp2         | G3BP2    | 143.5181686 | 152.4347042 | 139.2182157 | 131.2709456 | 131.5899539 | 194.8570686 | 187.1566287  | 93.12314583 | 126.7312407 | 103.7900356 |
| ENSMUSG00000040455 | 0.096644865  | 4.967099412  | 0.177776704 | 0.673290909 | 0.999071534 | Usp45         | Usp45         | USP45    | 29.33525402 | 28.45922132 | 31.23658224 | 30.38936267 | 36.9524473  | 42.27481584 | 37.79373139  | 35.16296827 | 19.64216377 | 23.46386826 |
| ENSMUSG00000029470 | -0.088622005 | 5.60529114   | 0.177750755 | 0.673313374 | 0.999071534 | P2rx4         | P2rx4         | P2RX4    | 54.31934596 | 45.41617402 | 54.12545715 | 52.10596202 | 53.63010051 | 41.91100504 | 42.00022547  | 54.78238475 | 38.498641   | 47.97347995 |
| ENSMUSG00000025403 | 0.111228144  | 6.598415127  | 0.177726294 | 0.673334553 | 0.999071534 | Shmt2         | Shmt2         | SHMT2    | 113.9723745 | 60.17939507 | 122.7920819 | 79.72004042 | 107.4564087 | 177.6124363 | 100.8264272  | 64.45392808 | 77.62583124 | 79.86865462 |
| ENSMUSG00000031819 | 0.104646259  | 6.155072153  | 0.177666915 | 0.673385971 | 0.999071534 | Emc8          | Emc8          | EMC8     | 82.39135938 | 49.86292735 | 79.50518022 | 76.2509351  | 67.16843076 | 87.38735599 | 99.2085449   | 42.27846087 | 63.48347332 | 65.3589645  |
| ENSMUSG00000025207 | -0.247767963 | 1.341657215  | 0.17742318  | 0.673597135 | 0.999071534 | Sema4g        | Sema4g        | SEMA4G   | 1.684320805 | 5.454684085 | 2.154247051 | 2.567137942 | 1.63506404  | 1.673529715 | 0.517722348  | 3.661369977 | 2.514196963 | 1.895409971 |
| ENSMUSG00000025730 | 0.10023796   | 4.580838046  | 0.177246451 | 0.673750354 | 0.999071534 | Rab40c        | Rab40c        | RAB40C   | 25.96661241 | 21.46299608 | 22.61959403 | 24.56126572 | 24.59136316 | 23.50217817 | 22.45620684  | 24.80060041 | 17.91365336 | 30.13048264 |
| ENSMUSG00000026932 | 0.101526851  | 5.897948614  | 0.177209565 | 0.673782345 | 0.999071534 | Nacc2         | Nacc2         | NACC2    | 50.17872398 | 45.71262424 | 68.33002365 | 64.80288752 | 68.21487174 | 79.01970741 | 35.39926553  | 55.68045663 | 61.75496291 | 64.90145175 |
| ENSMUSG00000025094 | 0.208252924  | 1.677543645  | 0.177136396 | 0.673845815 | 0.999071534 | Slc18a2       | Slc18a2       | SLC18A2  | 1.052700503 | 2.075151554 | 3.635291898 | 3.191576901 | 4.774386997 | 4.875064822 | 3.429910554  | 3.592287524 | 1.728510412 | 2.679717545 |
| ENSMUSG00000037428 | 0.372718547  | -0.444953375 | 0.176977963 | 0.673983298 | 0.999071534 | Vgf           | Vgf           | VGF      | 0.771980369 | 0.711480533 | 0.740522424 | 0.346910533 | 0.130805123 | 0.582097292 | 0.453007054  | 1.243484143 | 0           | 1.045743432 |
| ENSMUSG00000044465 | 0.110214564  | 4.086858158  | 0.176962508 | 0.673996714 | 0.999071534 | Fam160a2      | Fam160a2      | FAM160A2 | 20.14166963 | 16.83837261 | 14.47384737 | 13.66827499 | 19.42456079 | 22.62903223 | 15.53167044  | 20.10299365 | 10.21392516 | 17.58156145 |
| ENSMUSG00000044730 | 0.161994997  | 2.458165396  | 0.176954847 | 0.674003364 | 0.999071534 | 9930104L06Rik | 9930104L06Rik |          | 5.684582717 | 4.921073686 | 3.769932339 | 5.689332737 | 6.213243352 | 6.69411886  | 5.953807     | 4.90485412  | 2.749902928 | 7.581639883 |
| ENSMUSG00000056673 | 0.331938267  | 0.812622888  | 0.176866592 | 0.674079987 | 0.999071534 | Kdm5d         | Kdm5d         | KDM5D    | 3.579181711 | 0.118580089 | 1.817645949 | 0.277528426 | 1.831271725 | 0.9459081   | 0.388291761  | 1.312566595 | 2.199922343 | 3.594743048 |
| ENSMUSG0000005069  | -0.087493577 | 5.565339943  | 0.17676629  | 0.674167096 | 0.999071534 | Pex5          | Pex5          | PEX5     | 48.63476324 | 54.84329108 | 56.14506377 | 43.01690606 | 50.29456987 | 54.71714546 | 36.62885611  | 50.01569553 | 30.01322625 | 52.22181264 |
| ENSMUSG00000031683 | 0.106321252  | 6.096513662  | 0.176726062 | 0.67420204  | 0.999071534 | Lsm6          | Lsm6          | LSM6     | 71.79417431 | 48.02493597 | 76.20648943 | 72.64306556 | 72.26983056 | 86.8052587  | 108.4628319  | 44.21276953 | 48.63399751 | 59.14986288 |
| ENSMUSG00000067851 | 0.08560411   | 5.902471582  | 0.176642642 | 0.674274519 | 0.999071534 | Arfgef1       | Arfgef1       | ARFGEF1  | 65.96923153 | 68.00568093 | 59.98231632 | 45.23713347 | 62.59025145 | 68.32366967 | 58.63205589  | 60.37806339 | 56.41229436 | 51.76429989 |
| ENSMUSG00000028243 | 0.123114114  | 3.683675182  | 0.176630604 | 0.674284981 | 0.999071534 | Ubxn2b        | Ubxn2b        | UBXN2B   | 8.983044293 | 14.05174052 | 13.39672385 | 13.32136446 | 13.27672    | 13.46099988 | 12.8783434   | 10.08603805 | 13.67094599 | 13.20251083 |
| ENSMUSG00000029629 | 0.12577259   | 6.17393629   | 0.176535148 | 0.674367946 | 0.999071534 | Phf14         | Phf14         | PHF14    | 51.44196459 | 55.96980192 | 90.41105592 | 89.91921009 | 67.62624869 | 61.92059946 | 44.07111486  | 59.61815642 | 102.2963889 | 81.50262874 |
| ENSMUSG00000022034 | 0.233608987  | 3.286511116  | 0.176426068 | 0.674462784 | 0.999071534 | Esco2         | Esco2         | ESCO2    | 15.57996745 | 6.46261484  | 7.80914556  | 6.591300122 | 9.744981678 | 23.21112953 | 20.06174098  | 2.625133191 | 1.021392516 | 7.646998847 |
| ENSMUSG00000086474 | 0.458686809  | -0.551717023 | 0.176392149 | 0.674492282 | 0.999071534 | 9130204K15Rik | 9130204K15Rik |          | 0.771980369 | 0.474320355 | 0           | 1.040731598 | 0.065402562 | 1.018670261 | 0.841298815  | 1.174401691 | 0.15713731  | 0           |
| ENSMUSG00000083878 | 0.391288647  | -0.470290515 | 0.176383897 | 0.674499458 | 0.999071534 | Gm12034       | Gm12034       |          | 1.122880537 | 0.415030311 | 0.269280881 | 0.624438959 | 0.261610246 | 0.072762162 | 0.711868228  | 1.105319238 | 1.099961171 | 0.065358965 |
| ENSMUSG00000015932 | 0.106467004  | 9.354492193  | 0.176374097 | 0.674507982 | 0.999071534 | Dstn          | Dstn          | DSTN     | 589.8631819 | 699.8596842 | 598.207478  | 719.8393554 | 657.3611466 | 697.352556  | 798.8455827  | 594.93808   | 579.0509881 | 596.3351921 |
| ENSMUSG00000027661 | 0.357480092  | -0.08452981  | 0.176337379 | 0.674539919 | 0.999071534 | Slc2a10       | Slc2a10       | SLC2A10  | 0.350900168 | 1.185800888 | 1.481044848 | 0           | 0.654025616 | 2.182864846 | 0.841298815  | 0.483577167 | 0.31427462  | 0.849666539 |
| ENSMUSG00000029638 | 0.312403577  | 2.865485588  | 0.176326344 | 0.674549518 | 0.999071534 | Glccl1        | Glccl1        | GLCC1    | 4.140621979 | 2.075151554 | 13.66600473 | 7.701413827 | 5.363010051 | 0.9459081   | 0.19414588   | 12.36575898 | 11.78529826 | 10.1306395  |
| ENSMUSG00000070493 | 0.126106857  | 9.031546218  | 0.176325745 | 0.67455004  | 0.999071534 | Chchd2        | Chchd2        | CHCHD2   | 586.3541802 | 314.1186553 | 545.4284252 | 688.1317328 | 446.503288  | 402.8113262 | 601.5933682  | 440.4697165 | 553.6733125 | 578.7536307 |
| ENSMUSG00000038147 | -0.185302099 | 4.544783913  | 0.176255292 | 0.674611333 | 0.999071534 | Cd84          | Cd84          | CD84     | 35.09001677 | 40.49510033 | 18.8496617  | 15.54159187 | 19.09754799 | 35.07136185 | 48.6659007   | 11.605852   | 5.656943167 | 9.542408818 |
| ENSMUSG00000002768 | -0.104051396 | 5.961960387  | 0.176211772 | 0.674649202 | 0.999071534 | Mea1          | Mea1          | MEA1     | 75.16281592 | 61.12803578 | 56.41434465 | 66.95373282 | 75.14754327 | 41.40166991 | 85.87719445  | 61.62154754 | 37.63438579 | 61.5027856  |
| ENSMUSG00000071266 | 0.114209634  | 3.988886409  | 0.176203707 | 0.674656221 | 0.999071534 | Zfp946        | Zfp946        |          | 16.77302802 | 16.18618212 | 12.65620142 | 16.09664872 | 16.80845833 | 16.0804377  | 22.26206096  | 14.30006765 | 10.99961171 | 15.75151045 |
| ENSMUSG00000000738 | -0.091471954 | 5.962326947  | 0.17619467  | 0.674664085 | 0.999071534 | Spg7          | Spg7          | SPG7     | 72.56615468 | 65.87123934 | 65.30061373 | 75.97340667 | 52.38745184 | 74.87226421 | 44.13583015  | 57.40751794 | 48.08401692 | 68.36547687 |
| ENSMUSG00000038888 | -0.130161507 | 3.329384695  | 0.176096193 | 0.6747498   | 0.999071534 | Ctu1          | Ctu1          | CTU1     | 9.404124495 | 9.130666839 | 10.97319592 | 12.14186865 | 12.03407133 | 13.82481069 | 7.830550511  | 8.013564478 | 6.285492408 | 10.78422914 |
| ENSMUSG00000057388 | 0.108347998  | 6.221906092  | 0.176036231 | 0.674802006 | 0.999071534 | Mrpl18        | Mrpl18        | MRPL18   | 87.02324159 | 64.32968918 | 76.20648943 | 71.94924449 | 72.92385618 | 95.82776672 | 129.883594   | 52.84807608 | 44.86270206 | 57.90804255 |
| ENSMUSG00000083496 | 0.414158088  | 0.432932915  | 0.176015014 | 0.674820481 | 0.999071534 | Gm11263       | Gm11263       |          | 2.245761073 | 0.889350666 | 0           | 0           | 2.419894779 | 0.800383777 | 2.265035272  | 0.138164905 | 1.414235792 | 1.960768935 |

|                      |              |              |             |             |             |               |               |                |             |             |             |             |             |             |             |             |             |             |
|----------------------|--------------|--------------|-------------|-------------|-------------|---------------|---------------|----------------|-------------|-------------|-------------|-------------|-------------|-------------|-------------|-------------|-------------|-------------|
| ENSMUSG00000064262   | 0.171518712  | 2.432063271  | 0.176014266 | 0.674821132 | 0.999071534 | Gimap8        | Gimap8        | GIMAP8         | 5.75476275  | 4.328173242 | 6.126140051 | 6.521918016 | 2.812310149 | 7.712789121 | 6.147952881 | 4.075864691 | 2.749902928 | 6.993409202 |
| ENSMUSG00000045639   | -0.129225973 | 3.771041611  | 0.176008209 | 0.674826406 | 0.999071534 | Zfp629        | Zfp629        | ZNF629         | 14.52726694 | 18.79494408 | 15.28169002 | 10.33793388 | 14.6501738  | 16.0067553  | 6.600959935 | 15.05997462 | 10.44963113 | 14.50969012 |
| ENSMUSG000000054619  | -0.145776399 | 3.049223814  | 0.175970736 | 0.674859041 | 0.999071534 | Mett17a1      | Mett17a1      | METTL7A        | 10.52700503 | 10.73149804 | 6.462741153 | 7.909560147 | 8.894748377 | 9.168032352 | 10.03087049 | 8.704389002 | 4.16413872  | 5.882306805 |
| ENSMUSG000000049672  | 0.108653106  | 4.301439264  | 0.175878624 | 0.674939275 | 0.999071534 | Zbtb14        | Zbtb14        | ZBTB14         | 14.66762701 | 19.74358479 | 18.24377971 | 23.58991623 | 21.19042996 | 25.75780518 | 23.42693624 | 16.23437631 | 17.99222202 | 15.22863873 |
| ENSMUSG000000021552  | 0.112946977  | 5.629762521  | 0.175861814 | 0.67495392  | 0.999071534 | Gkap1         | Gkap1         | GKAP1          | 48.70494328 | 26.26548967 | 54.9332998  | 64.87226962 | 49.96755706 | 45.18530231 | 40.18819725 | 48.28863422 | 58.76935401 | 49.14994131 |
| ENSMUSG000000020105  | 0.176625646  | 2.319379537  | 0.175832621 | 0.674979356 | 0.999071534 | Lrig3         | Lrig3         | LRIG3          | 4.35116208  | 4.921073686 | 5.183656966 | 5.342422204 | 3.793348573 | 6.912405345 | 5.436084652 | 1.934308667 | 6.049786443 | 4.509768551 |
| ENSMUSG000000021927  | -0.550562099 | -1.075146433 | 0.175751945 | 0.67504966  | 0.999071534 | Gm5803        | Gm5803        |                | 1.263240604 | 0.177870133 | 0.403921322 | 0           | 0.261610246 | 1.382481069 | 0.064715293 | 0           | 0.078568655 | 0           |
| ENSMUSG000000030946  | -0.140698164 | 3.180340318  | 0.175658075 | 0.675131486 | 0.999071534 | Lhpp          | Lhpp          | LHPP           | 12.07096577 | 8.241316173 | 9.424830848 | 9.991023343 | 8.894748377 | 13.2427134  | 10.54859284 | 7.046410144 | 4.478413341 | 7.058768167 |
| ENSMUSG000000027397  | 0.098441606  | 6.546079985  | 0.175549344 | 0.675226298 | 0.999071534 | Slc20a1       | Slc20a1       | SLC20A1        | 85.54946089 | 135.8334917 | 80.85158463 | 84.7155521  | 81.29538406 | 100.1934964 | 72.67527458 | 99.5478139  | 88.62544295 | 101.241036  |
| ENSMUSG000000091697  | -0.315877743 | 2.567235764  | 0.175419066 | 0.675339944 | 0.999071534 | Eif3s6-ps2    | Eif3s6-ps2    |                | 10.6673651  | 10.0200175  | 3.298690797 | 3.885397967 | 5.690022859 | 8.440410737 | 14.81980221 | 2.141556024 | 0           | 1.176461361 |
| ENSMUSG000000020273  | 0.12769085   | 3.650016814  | 0.17533009  | 0.675443068 | 0.999071534 | Papolg        | Papolg        | PAPOLG         | 12.42186594 | 13.81458035 | 12.18495988 | 8.742145425 | 14.78097892 | 15.64386473 | 17.66727512 | 10.84594503 | 6.285492408 | 13.59466462 |
| ENSMUSG000000027710  | -0.099782701 | 4.886205094  | 0.175300834 | 0.675443126 | 0.999071534 | Acad9         | Acad9         | ACAD9          | 32.0020953  | 38.24207864 | 26.99540836 | 33.09526482 | 27.59988099 | 41.40166991 | 33.39309144 | 18.44501479 | 20.66355629 | 26.27430373 |
| ENSMUSG000000021578  | 0.090471031  | 5.632545558  | 0.175289031 | 0.675453429 | 0.999071534 | Ccdc127       | Ccdc127       | CCDC127        | 43.5116208  | 52.59026939 | 35.54507634 | 51.82843359 | 65.46796416 | 63.01203188 | 55.97872886 | 47.87413951 | 36.06301269 | 46.4048648  |
| ENSMUSG000000026491  | 0.086775835  | 5.996298635  | 0.175288376 | 0.675454    | 0.999071534 | Ahctf1        | Ahctf1        | AHCTF1         | 57.96870771 | 64.68543845 | 75.60060744 | 56.47703473 | 66.2527949  | 93.28109107 | 54.03727006 | 63.76310356 | 51.14819447 | 59.28058081 |
| ENSMUSG000000024835  | -0.101860755 | 7.792204077  | 0.175001987 | 0.675704112 | 0.999071534 | Coro1b        | Coro1b        | CORO1B         | 229.9799699 | 246.2908445 | 235.7554116 | 211.3378965 | 269.3277487 | 202.0605225 | 216.1490802 | 224.8633825 | 160.6728997 | 225.5537865 |
| ENSMUSG000000018378  | 0.128592077  | 5.655534411  | 0.174995383 | 0.675709883 | 0.999071534 | Cuedc1        | Cuedc1        | CUEDC1         | 37.96739815 | 37.76775829 | 70.08034938 | 43.84949134 | 59.71253874 | 40.96509694 | 21.93848449 | 66.18098939 | 48.94827213 | 70.26088684 |
| ENSMUSG000000069272  | 0.304417728  | 1.85624603   | 0.174965183 | 0.675736272 | 0.999071534 | Hist1h2ae     | Hist1h2ae     |                | 0           | 0.652190488 | 5.183656966 | 5.758714844 | 4.381971627 | 3.056010784 | 3.882917609 | 3.17779281  | 4.242707375 | 3.856178906 |
| ENSMUSG000000022758  | -0.142731025 | 3.318130868  | 0.174797232 | 0.675883079 | 0.999071534 | P2rx6         | P2rx6         | P2RX6          | 8.211063924 | 12.03587901 | 10.29999371 | 8.811527532 | 14.38856355 | 8.440410737 | 5.75966112  | 9.187966168 | 7.6997282   | 13.72538255 |
| ENSMUSG000000024120  | -0.100787968 | 6.082874759  | 0.174735165 | 0.675937353 | 0.999071534 | Lrpprc        | Lrpprc        | LRPPRC         | 81.19829881 | 59.76436476 | 83.81367433 | 72.78182977 | 65.53336672 | 111.0350585 | 69.89251696 | 38.96250315 | 42.89848568 | 63.46355453 |
| ENSMUSG000000069727  | -0.180111177 | 2.022774772  | 0.174601505 | 0.676054269 | 0.999071534 | Gm5595        | Gm5595        |                | 3.228281543 | 4.03172302  | 4.375814322 | 5.411804311 | 4.51277675  | 4.584016176 | 3.041618794 | 4.697606763 | 3.535589479 | 1.895409971 |
| ENSMUSG000000025862  | 0.102456739  | 7.185748107  | 0.174503069 | 0.676140408 | 0.999071534 | Stag2         | Stag2         | STAG2          | 124.8502797 | 163.3440723 | 145.8155973 | 139.8049447 | 154.4154479 | 132.7181826 | 126.0653917 | 171.186317  | 145.4305806 | 139.4106713 |
| ENSMUSG000000034022  | -0.100127033 | 6.157481434  | 0.174436175 | 0.676198961 | 0.999071534 | Cpsf1         | Cpsf1         | CPSF1          | 96.00628589 | 66.93846014 | 68.80126519 | 77.56919512 | 73.44707667 | 100.7755937 | 45.6889972  | 52.22633401 | 48.71256616 | 91.76398616 |
| ENSMUSG000000023019  | 0.376647895  | 0.090673929  | 0.174431606 | 0.676202961 | 0.999071534 | Gpd1          | Gpd1          | GPD1           | 1.894860906 | 1.600831199 | 0.471241542 | 0           | 0.327012808 | 2.037340523 | 0.647152935 | 0.207247357 | 1.649941757 | 0.588230681 |
| ENSMUSG000000022146  | 0.118870807  | 5.626450561  | 0.174421589 | 0.67621173  | 0.999071534 | Osmr          | Osmr          | OSMR           | 40.91495955 | 74.764746   | 38.57448626 | 41.2823534  | 50.29456987 | 47.36816715 | 36.36999494 | 88.49462152 | 31.42746204 | 43.65978829 |
| ENSMUSG000000006335  | -0.115890229 | 3.867486956  | 0.174302824 | 0.676315724 | 0.999071534 | Tfpt          | Tfpt          | TFPT           | 16.14140771 | 15.00038123 | 14.74312825 | 18.94131509 | 12.9497072  | 17.24463228 | 17.27898336 | 12.15851162 | 9.113963991 | 12.22212636 |
| ENSMUSG000000026718  | 0.107279227  | 5.354328616  | 0.174289306 | 0.676327565 | 0.999071534 | Stam          | Stam          | STAM           | 28.91417382 | 52.70884948 | 45.57578917 | 35.87054909 | 40.74579587 | 35.72622131 | 35.20511965 | 59.54907396 | 38.02722907 | 32.28732847 |
| ENSMUSG000000063506  | 0.083722545  | 6.296653444  | 0.174283172 | 0.676332937 | 0.999071534 | Arhgap22      | Arhgap22      | ARHGAP22       | 79.9350582  | 79.33007942 | 78.4280567  | 67.92508231 | 90.90956062 | 99.82968561 | 70.08666284 | 75.36895556 | 64.11202256 | 83.33267974 |
| ENSMUSG000000029823  | 0.102362583  | 6.946860244  | 0.174231874 | 0.676377871 | 0.999071534 | Luc7l2        | Luc7l2        | C7orf55-LUC7L2 | 95.58520568 | 119.2322793 | 142.9208278 | 130.7852708 | 126.9463721 | 128.7162637 | 92.73701556 | 158.8205581 | 92.78958167 | 142.6786195 |
| ENSMUSG000000071855  | 0.206916561  | 1.604994635  | 0.17418423  | 0.676419611 | 0.999071534 | Ccdc112       | Ccdc112       | CCDC112        | 1.965040939 | 2.490181865 | 3.500651458 | 2.428373729 | 3.662543449 | 3.201535107 | 1.164875283 | 3.937699786 | 3.928432755 | 2.483640651 |
| ENSMUSG000000029022  | 0.115308101  | 4.79285666   | 0.174138775 | 0.67645944  | 0.999071534 | Mlip          | Mlip          | MIIP           | 28.63345369 | 21.10725581 | 26.99540836 | 34.48290695 | 25.57240158 | 22.55627007 | 20.19117157 | 23.41895136 | 32.60599187 | 36.01278944 |
| ENSMUSG000000018973  | 0.435172433  | -0.440031122 | 0.174074101 | 0.676516119 | 0.999071534 | Hoxb1         | Hoxb1         | HOXB1          | 0.210540101 | 0.059290044 | 0.673202203 | 1.595788451 | 0.130805123 | 0.218286485 | 0.129430587 | 1.105319238 | 1.571373102 | 0.130717929 |
| ENSMUSG000000035305  | -0.166200825 | 3.047928992  | 0.174073391 | 0.676516741 | 0.999071534 | Ror1          | Ror1          | ROR1           | 3.789721811 | 7.707705773 | 7.135943356 | 14.91715291 | 10.59521498 | 7.64002696  | 6.083237587 | 7.460904859 | 7.778296855 | 7.581639883 |
| ENSMUSG000000059119  | -0.098024988 | 6.765987538  | 0.174072076 | 0.676517894 | 0.999071534 | Nap1l4        | Nap1l4        | NAP1L4         | 142.6058282 | 133.6990501 | 99.70124633 | 98.03691655 | 111.2497573 | 150.1083392 | 132.4722058 | 79.16849044 | 68.04045531 | 89.54178137 |
| ENSMUSG000000021256  | -0.316846747 | 1.72058796   | 0.173922665 | 0.676648884 | 0.999071534 | Vash1         | Vash1         | VASH1          | 6.73728322  | 9.308536972 | 1.009803305 | 0.485674746 | 0.850233301 | 9.168032352 | 2.78275762  | 0.898071881 | 1.099961171 | 1.045743432 |
| ENSMUSG000000002393  | -0.105207487 | 5.492918975  | 0.173839357 | 0.67672195  | 0.999071534 | Nr2f6         | Nr2f6         | NR2F6          | 55.0211463  | 45.77191428 | 52.77905275 | 41.62926393 | 46.8282341  | 79.16523174 | 47.630456   | 22.86629174 | 31.1138742  | 35.88207151 |
| ENSMUSG0000000040177 | 0.142919343  | 3.268757794  | 0.173763788 | 0.676788246 | 0.999071534 | 2310057M21Rik | 2310057M21Rik | C10orf88       | 8.421604025 | 10.67220799 | 13.46404407 | 5.203657991 | 9.352566308 | 13.38823772 | 7.248111287 | 8.013564478 | 9.742513232 | 9.934562605 |
| ENSMUSG000000047330  | -0.36670245  | -0.38491505  | 0.173755172 | 0.676795805 | 0.999071534 | Kcne4         | Kcne4         | KCNE4          | 0.631620302 | 0.711480533 | 0.605881983 | 1.526406344 | 0.130805123 | 1.091432423 | 0.776583522 | 0.552659619 | 0           | 0.392153787 |
| ENSMUSG000000020362  | 0.094802536  | 6.716957587  | 0.17366476  | 0.676875147 | 0.999071534 | Cnot6         | Cnot6         | CNOT6          | 100.0065478 | 99.37011443 | 114.9156161 | 103.1018103 | 109.8763035 | 155.3472149 | 130.0130246 | 82.55353061 | 86.58265792 | 78.03860362 |
| ENSMUSG000000026753  | 0.085654671  | 5.788937503  | 0.173524208 | 0.676998538 | 0.999071534 | Ppp6c         | Ppp6c         | PPP6C          | 60.28464881 | 61.24661587 | 52.77905275 | 47.04106824 | 57.2272414  | 60.68364271 | 64.5211476  | 58.30558982 | 33.78452169 | 59.86881149 |

|                     |              |              |             |             |             |               |               |          |             |             |             |             |             |             |             |             |             |             |
|---------------------|--------------|--------------|-------------|-------------|-------------|---------------|---------------|----------|-------------|-------------|-------------|-------------|-------------|-------------|-------------|-------------|-------------|-------------|
| ENSMUSG00000029333  | -0.196442478 | 2.421898546  | 0.173383624 | 0.677122016 | 0.999071534 | Rasgef1b      | Rasgef1b      | RASGEF1B | 6.316203019 | 10.13859759 | 2.894769475 | 3.885397967 | 5.886230544 | 7.931075606 | 3.947632902 | 7.737234668 | 1.492804447 | 3.33330719  |
| ENSMUSG000000085704 | 0.329082185  | -0.156954865 | 0.173320172 | 0.677177766 | 0.999071534 | 4921531C22Rik | 4921531C22Rik |          | 0.210540101 | 0.592900444 | 1.211763966 | 0.346910533 | 1.177246109 | 1.236956746 | 0.970729402 | 0.138164905 | 1.178529826 | 0.588230681 |
| ENSMUSG00000033826  | 0.181972887  | 2.620266934  | 0.173210868 | 0.677273832 | 0.999071534 | Dnah8         | Dnah8         | DNAH8    | 5.193322482 | 4.387463286 | 6.866662475 | 6.521918016 | 6.213243352 | 3.419821592 | 2.9769035   | 8.566224097 | 4.871256616 | 10.39207536 |
| ENSMUSG00000029557  | -0.18823364  | 2.640494666  | 0.173172321 | 0.677307718 | 0.999071534 | Ftsj2         | Ftsj2         | MRM2     | 9.825204696 | 5.454684085 | 8.751628644 | 4.787365352 | 5.035997243 | 9.240794513 | 8.801279913 | 1.4507315   | 4.16413872  | 4.705845444 |
| ENSMUSG00000034893  | -0.090672424 | 5.379552326  | 0.173068139 | 0.677399327 | 0.999071534 | Cog3          | Cog3          | COG3     | 41.82729999 | 51.34517846 | 37.69932339 | 48.15118194 | 42.77327528 | 43.80282124 | 36.11113376 | 50.29202534 | 29.07040239 | 35.3591998  |
| ENSMUSG00000041319  | 0.104684717  | 4.655192805  | 0.172962615 | 0.677492148 | 0.999071534 | Thoc6         | Thoc6         | THOC6    | 36.00235721 | 21.04796576 | 21.87907161 | 24.56126572 | 22.04066326 | 23.35665385 | 32.87536909 | 22.45179703 | 19.64216377 | 26.73181648 |
| ENSMUSG00000053263  | 0.414096287  | -0.335797124 | 0.172914805 | 0.677534214 | 0.999071534 | Gm12592       | Gm12592       |          | 0.210540101 | 1.185800888 | 0           | 0.763203172 | 0.719428178 | 0.873145938 | 0.323576467 | 0.967154334 | 0           | 1.568615148 |
| ENSMUSG00000027014  | -0.107179209 | 4.235173575  | 0.172759759 | 0.67767068  | 0.999071534 | Cwc22         | Cwc22         | CWC22    | 17.75554849 | 21.70015625 | 23.09083558 | 15.61097397 | 22.825494   | 23.86598898 | 15.98467749 | 18.03052007 | 10.13535651 | 20.78415071 |
| ENSMUSG00000026393  | 0.090047163  | 6.296973747  | 0.172516124 | 0.677885261 | 0.999071534 | Nek7          | Nek7          | NEK7     | 80.70703857 | 83.06535221 | 69.47446739 | 72.64306556 | 89.60150939 | 94.29976133 | 106.3272272 | 77.02693442 | 55.4694705  | 61.89493939 |
| ENSMUSG00000029577  | -0.090453807 | 5.949099343  | 0.172509757 | 0.677890871 | 0.999071534 | Ube3b         | Ube3b         | UBE3B    | 66.60085183 | 75.77267675 | 58.43395126 | 61.4031643  | 68.21487174 | 78.72865877 | 38.37616903 | 59.2036617  | 48.08401692 | 66.53542587 |
| ENSMUSG00000014294  | -0.124924214 | 7.53132467   | 0.172432529 | 0.677958929 | 0.999071534 | Ndufa2        | Ndufa2        | NDUFA2   | 206.3994786 | 127.9479158 | 242.0835123 | 268.300606  | 148.4638148 | 143.1959339 | 153.0516691 | 135.6779365 | 191.5503811 | 210.5212247 |
| ENSMUSG00000027695  | -0.109349867 | 4.163675562  | 0.172327858 | 0.678051199 | 0.999071534 | Pld1          | Pld1          | PLD1     | 15.01852718 | 21.58157616 | 21.00390875 | 18.87193298 | 19.22835311 | 17.75396741 | 12.49005164 | 20.58657081 | 13.51380868 | 18.10443317 |
| ENSMUSG00000029722  | -0.107848578 | 4.212869068  | 0.172046141 | 0.678299703 | 0.999071534 | Agfg2         | Agfg2         | AGFG2    | 22.10671057 | 18.26133368 | 18.78234148 | 16.79046978 | 23.54492217 | 28.37724299 | 19.73816451 | 13.47107822 | 11.39245499 | 15.16327977 |
| ENSMUSG00000020076  | 0.101623617  | 6.749524689  | 0.172023526 | 0.678319662 | 0.999071534 | Ddx50         | Ddx50         | DDX50    | 109.7615725 | 157.592938  | 80.58230375 | 81.73212151 | 111.0535496 | 110.5257234 | 129.1717258 | 119.6508075 | 69.69039707 | 111.3716755 |
| ENSMUSG00000074643  | 0.146262138  | 5.107737214  | 0.171944156 | 0.678389724 | 0.999071534 | Cpne1         | Cpne1         | CPNE1    | 47.37152264 | 56.56270236 | 22.21567271 | 16.09664872 | 28.71172454 | 63.30308052 | 51.5780889  | 31.50159829 | 18.62077126 | 16.73189491 |
| ENSMUSG00000027363  | 0.107460629  | 6.140677434  | 0.171935339 | 0.678397508 | 0.999071534 | Usp8          | Usp8          | USP8     | 48.63476324 | 80.04155995 | 83.0731519  | 56.82394526 | 84.04229165 | 70.28824803 | 42.84152428 | 94.78112468 | 67.17620011 | 73.00596335 |
| ENSMUSG00000097335  | 0.3456964    | -0.036591359 | 0.171926617 | 0.678405207 | 0.999071534 | Gm26563       | Gm26563       |          | 0.070180034 | 0.889350666 | 0.807842644 | 1.873316877 | 0.130805123 | 0.654859454 | 0.776583522 | 0.690824524 | 1.099961171 | 1.241820326 |
| ENSMUSG00000091021  | 0.22163547   | 1.510157361  | 0.171898963 | 0.678429624 | 0.999071534 | Gm17300       | Gm17300       |          | 2.947561409 | 0.948640711 | 3.231370576 | 3.81601586  | 1.962076848 | 2.910486461 | 2.588611739 | 2.901463001 | 0.942823861 | 5.032640267 |
| ENSMUSG00000052812  | 0.25190984   | 1.561582023  | 0.171875549 | 0.678450299 | 0.999071534 | Atad2b        | Atad2b        | ATAD2B   | 4.772242281 | 4.328173242 | 1.88496617  | 0.555056852 | 1.962076848 | 8.58593506  | 2.265035272 | 2.417885834 | 1.414235792 | 1.30717929  |
| ENSMUSG00000033644  | -0.224062595 | 1.267064128  | 0.17184615  | 0.678476261 | 0.999071534 | Piwi2         | Piwi2         | PIWI2    | 3.719541778 | 3.320242487 | 2.221567271 | 1.179495811 | 2.354492217 | 2.619437815 | 2.265035272 | 1.4507315   | 0.549980586 | 3.529384083 |
| ENSMUSG00000045466  | 0.191684758  | 1.774862909  | 0.171524772 | 0.678760235 | 0.999071534 | Zfp956        | Zfp956        |          | 3.017741442 | 4.03172302  | 2.154247051 | 2.497755836 | 4.316569065 | 3.128772945 | 2.653327033 | 3.17779281  | 4.792687961 | 2.679717545 |
| ENSMUSG00000066735  | 0.086820454  | 5.556481183  | 0.171384013 | 0.67888471  | 0.999071534 | Vkorc1l1      | Vkorc1l1      |          | 50.59980418 | 43.93392291 | 46.51827226 | 48.7756209  | 46.30501361 | 59.73773461 | 62.25611233 | 38.96250315 | 31.27032473 | 44.96696758 |
| ENSMUSG00000047759  | -0.147851136 | 3.843492723  | 0.171354064 | 0.678911201 | 0.999071534 | Hs3st3a1      | Hs3st3a1      | HS3ST3B1 | 11.7200656  | 18.0241735  | 16.76273487 | 12.55816129 | 18.70513262 | 13.16995124 | 6.277383467 | 25.28417758 | 10.05678785 | 9.86920364  |
| ENSMUSG00000025737  | 0.107222799  | 4.103737576  | 0.171255713 | 0.678998219 | 0.999071534 | Wdr24         | Wdr24         | WDR24    | 18.94860906 | 18.79494408 | 15.01240914 | 11.58681179 | 21.4520402  | 19.42749713 | 18.70271982 | 17.20153065 | 13.59237733 | 16.79725388 |
| ENSMUSG00000030738  | -0.104213665 | 7.523098992  | 0.171170149 | 0.679073946 | 0.999071534 | Elf3c         | Elf3c         | EIF3CL   | 170.2567614 | 220.262515  | 211.7894132 | 186.0828098 | 200.1318385 | 270.4569544 | 125.5476693 | 151.5669006 | 154.6231132 | 165.750334  |
| ENSMUSG00000068396  | 0.135874737  | 9.256771922  | 0.171066331 | 0.679165859 | 0.999071534 | Rpb34-ps1     | Rpb34-ps1     |          | 987.7137921 | 654.0284799 | 394.0925699 | 526.0551319 | 475.0842074 | 498.6390929 | 1094.982766 | 481.021116  | 493.2540167 | 504.0483343 |
| ENSMUSG00000006313  | 0.331091197  | -0.031891061 | 0.171022657 | 0.679204535 | 0.999071534 | Upk1a         | Upk1a         | UPK1A    | 1.263240604 | 0.296450222 | 1.009803305 | 1.040731598 | 0.327012808 | 0.363810808 | 0.517722348 | 1.036236786 | 1.964216377 | 0.392153787 |
| ENSMUSG00000049130  | -0.125706613 | 5.231286885  | 0.171002202 | 0.679222265 | 0.999071534 | C5ar1         | C5ar1         | C5AR1    | 47.02062247 | 47.72848575 | 27.73593078 | 33.858468   | 47.3514546  | 61.12021568 | 49.50719951 | 25.76775474 | 10.99961171 | 34.57489222 |
| ENSMUSG00000050627  | -0.143494617 | 4.037186511  | 0.170895041 | 0.679317579 | 0.999071534 | Gpd1l         | Gpd1l         | GPD1L    | 24.91391191 | 15.41541155 | 19.45554368 | 14.43147816 | 14.78097892 | 33.39783214 | 19.8675951  | 7.875399573 | 8.092571475 | 9.934562605 |
| ENSMUSG00000033083  | 0.104719611  | 4.303967882  | 0.170838011 | 0.679368112 | 0.999071534 | Tbc1d4        | Tbc1d4        | TBC1D4   | 20.70310989 | 19.32855448 | 17.09933597 | 16.929234   | 24.39515548 | 29.97801055 | 18.37914335 | 13.47107822 | 17.91365336 | 19.80376624 |
| ENSMUSG00000037669  | -0.1111626   | 4.782544709  | 0.170812272 | 0.679390923 | 0.999071534 | 1110057K04Rik | Ldah          | LD4H     | 28.35273355 | 30.00076247 | 25.31240285 | 32.60959008 | 31.19702188 | 43.43901043 | 33.45780673 | 17.68510781 | 11.70672961 | 26.3396627  |
| ENSMUSG00000003526  | 0.181077109  | 2.480414738  | 0.170744174 | 0.679451282 | 0.999071534 | Prodh         | Prodh         | PRODH    | 4.842422314 | 5.098943819 | 4.847055865 | 6.03624327  | 5.624620297 | 8.876983706 | 5.630230533 | 4.144947144 | 7.464022234 | 1.764692042 |
| ENSMUSG00000048612  | -0.101064457 | 7.542567267  | 0.170697362 | 0.679492783 | 0.999071534 | Myof          | Myof          | MYOF     | 178.3976453 | 198.918099  | 225.186137  | 178.5895423 | 220.8644505 | 256.341095  | 136.6786998 | 156.3335898 | 146.6091104 | 183.9854851 |
| ENSMUSG000000045216 | 0.119347725  | 4.122427515  | 0.170672762 | 0.679514594 | 0.999071534 | Hs6st1        | Hs6st1        | HS6ST1   | 17.12392818 | 16.00831199 | 18.64770103 | 14.22333184 | 20.20939153 | 19.79130793 | 8.995425794 | 21.6228076  | 17.6779474  | 17.97371524 |
| ENSMUSG00000037896  | -0.100353557 | 5.092604828  | 0.170648501 | 0.679536106 | 0.999071534 | Rcor1         | Rcor1         | RCOR1    | 30.59849462 | 49.56647712 | 37.36272229 | 26.08767206 | 39.69935489 | 46.05844824 | 24.00937388 | 36.47553486 | 19.87786974 | 35.42455876 |
| ENSMUSG00000020594  | 0.104692949  | 7.471470991  | 0.170559918 | 0.679614669 | 0.999071534 | Pum2          | Pum2          | PUM2     | 136.4299852 | 155.2806263 | 209.5005257 | 206.6892954 | 175.2134625 | 192.0193443 | 152.0162244 | 197.299484  | 160.9871743 | 179.9985882 |
| ENSMUSG00000083086  | 0.353445955  | 0.498813894  | 0.170492944 | 0.679674084 | 0.999071534 | Gm15531       | Gm15531       |          | 0.631620302 | 1.837991377 | 0.06732022  | 2.497755836 | 0.654025616 | 1.382481069 | 1.941458804 | 1.519813953 | 0           | 2.287563758 |
| ENSMUSG00000033707  | 0.160662077  | 2.730845459  | 0.170455613 | 0.679707207 | 0.999071534 | Lrrc24        | Lrrc24        | LRRC24   | 7.368903522 | 4.743203553 | 3.90457278  | 9.64411281  | 6.017035667 | 10.33222694 | 4.724216424 | 5.457513739 | 6.049786443 | 7.058768167 |
| ENSMUSG00000047384  | 0.493227236  | -0.443242733 | 0.170301303 | 0.679844169 | 0.999071534 | A730013G03Rik | A730013G03Rik |          | 0           | 0.177870133 | 0.269280881 | 2.01208109  | 0.130805123 | 0.436572969 | 0.19414588  | 0           | 2.042785033 | 0.522871716 |

|                     |               |              |             |             |             |               |          |               |             |             |             |             |             |             |             |             |             |             |
|---------------------|---------------|--------------|-------------|-------------|-------------|---------------|----------|---------------|-------------|-------------|-------------|-------------|-------------|-------------|-------------|-------------|-------------|-------------|
| ENSMUSG00000002103  | -0.083732562  | 5.741209357  | 0.170292716 | 0.679851792 | 0.999071534 | Acip2         | Acip2    | ACP2          | 68.70625284 | 59.52720458 | 56.95290641 | 53.49360415 | 46.43581873 | 67.45052373 | 49.11890775 | 47.7359746  | 43.13419165 | 44.70553172 |
| ENSMUSG00000028080  | 0.221591876   | 1.210718614  | 0.170246119 | 0.679893166 | 0.999071534 | Lrba          | Lrba     | LRBA          | 1.894860906 | 3.142372354 | 2.423527932 | 1.387642131 | 1.63506404  | 3.710870238 | 2.523896446 | 0.828989429 | 2.907040239 | 1.437897219 |
| ENSMUSG00000036432  | -0.111788014  | 4.098540652  | 0.170234344 | 0.679903623 | 0.999071534 | Siah2         | Siah2    | SIAH2         | 17.61518842 | 18.37991377 | 17.90717861 | 19.14946141 | 18.50892493 | 22.33798359 | 11.19574577 | 14.71456236 | 10.21392516 | 22.02597104 |
| ENSMUSG00000083627  | -0.535133556  | -0.114301396 | 0.170220836 | 0.679915619 | 0.999071534 | Gm12502       | Gm12502  |               | 2.456301174 | 0           | 1.481044848 | 0.901967385 | 0           | 0           | 0.517722348 | 0.414494714 | 0           | 2.156845829 |
| ENSMUSG00000042670  | 0.120423504   | 5.527548053  | 0.170151175 | 0.679977488 | 0.999071534 | Immp1l        | Immp1l   | IMMP1L        | 61.33734932 | 35.57402664 | 39.31500868 | 54.25680732 | 37.67187548 | 30.77839432 | 83.54744388 | 39.30791541 | 34.6487769  | 40.78399385 |
| ENSMUSG00000024897  | -0.339554819  | -0.252633764 | 0.170097047 | 0.680025573 | 0.999071534 | Apba1         | Apba1    | APBA1         | 1.333420637 | 0.948640711 | 0.336601102 | 1.040731598 | 0.39241537  | 1.746291877 | 0.258861174 | 0.828989429 | 0.078568655 | 0.326794823 |
| ENSMUSG00000025185  | -0.187777279  | 3.676046627  | 0.169943499 | 0.680162026 | 0.999071534 | LoxI4         | LoxI4    | LOXL4         | 23.15941107 | 23.30098745 | 4.847055865 | 6.244389589 | 13.21131744 | 17.09910796 | 21.8737692  | 6.286503168 | 7.464022234 | 5.94766577  |
| ENSMUSG00000026490  | -0.115082229  | 5.923055834  | 0.169919349 | 0.680183494 | 0.999071534 | Cdc42bpa      | Cdc42bpa | CDC42BPA      | 48.91548338 | 89.23151683 | 62.94440602 | 42.66999553 | 84.95792751 | 69.70615074 | 29.83375029 | 81.17188156 | 38.57720965 | 63.79034936 |
| ENSMUSG00000040699  | -0.087732856  | 5.624151413  | 0.169885186 | 0.680213867 | 0.999071534 | Limd2         | Limd2    | LIMD2         | 60.35482885 | 44.28966317 | 57.76074905 | 47.11045035 | 53.95711332 | 72.39835071 | 43.42396192 | 34.40306129 | 39.83430813 | 44.24801897 |
| ENSMUSG00000030172  | -0.111451982  | 4.490638617  | 0.169846836 | 0.680247965 | 0.999071534 | Erc1          | Erc1     | ERC1          | 20.14166963 | 30.11934256 | 26.52416681 | 15.47220976 | 28.84252966 | 34.70755105 | 14.36679515 | 16.92520084 | 18.69933991 | 20.98022761 |
| ENSMUSG00000022906  | -0.096827743  | 4.754340154  | 0.169838793 | 0.680255117 | 0.999071534 | Parp9         | Parp9    | PARP9         | 34.17767633 | 35.45544656 | 24.77384109 | 22.41042042 | 27.86149124 | 37.47251318 | 25.36839504 | 26.32041436 | 17.6779474  | 21.04558657 |
| ENSMUSG00000029017  | 0.0904632     | 6.486915384  | 0.169750871 | 0.680333311 | 0.999071534 | Pmpcb         | Pmpcb    | PMPCB         | 93.54998471 | 83.65825266 | 78.4280567  | 98.73073762 | 95.35693481 | 85.64106411 | 116.9405353 | 87.45838473 | 70.00467169 | 84.90129489 |
| ENSMUSG00000049090  | -0.093067091  | 5.53912424   | 0.169657405 | 0.680416462 | 0.999071534 | Zadh2         | Zadh2    | ZADH2         | 57.1265473  | 51.22659837 | 34.87187414 | 47.73488931 | 58.01207214 | 61.77507513 | 51.06036656 | 31.01802112 | 38.97005293 | 36.20886634 |
| ENSMUSG00000039128  | 0.090296337   | 6.002396034  | 0.1696105   | 0.680458201 | 0.999071534 | Cdc123        | Cdc123   | CDC123        | 69.19751307 | 57.03702272 | 62.00192293 | 59.46046531 | 74.55892022 | 70.724821   | 92.47815438 | 55.54229172 | 46.90548709 | 55.03224811 |
| ENSMUSG00000010376  | -0.102343019  | 7.322408349  | 0.169605095 | 0.680463011 | 0.999071534 | Nedd8         | Nedd8    | NEDD8         | 171.520002  | 139.3908944 | 183.3802802 | 181.9198834 | 182.0807315 | 168.7354526 | 202.4941533 | 118.200076  | 101.589271  | 161.7634371 |
| ENSMUSG00000049811  | -0.195706855  | 2.03330679   | 0.169553289 | 0.680509119 | 0.999071534 | Fam161a       | Fam161a  | FAM161A       | 4.982782381 | 3.438822576 | 5.92417939  | 3.81601586  | 3.793348573 | 1.8918162   | 2.394465859 | 6.839162787 | 2.199922343 | 4.182973728 |
| ENSMUSG00000048154  | -0.107421723  | 6.122143181  | 0.169433273 | 0.680615967 | 0.999071534 | Kmt2d         | Kmt2d    | KMT2D         | 63.65329042 | 62.61028689 | 85.36203939 | 75.27958561 | 87.05080948 | 85.56830195 | 30.02789617 | 75.23079066 | 57.43368688 | 76.01247572 |
| ENSMUSG00000028455  | 0.102870954   | 5.911701465  | 0.169301961 | 0.680732923 | 0.999071534 | Stoml2        | Stoml2   | STOML2        | 68.07463254 | 60.53513534 | 56.21238399 | 55.92197788 | 60.36656435 | 72.76216152 | 104.2563378 | 38.47892598 | 41.32711258 | 48.03883891 |
| ENSMUSG00000045455  | 0.125678677   | 6.556586322  | 0.169300233 | 0.680734463 | 0.999071534 | Gm9797        | Gm9797   | TIMM8A        | 138.8862864 | 52.29381917 | 84.08295521 | 106.9872083 | 83.64987628 | 118.0929882 | 156.6757255 | 47.80505706 | 69.06184783 | 89.14962758 |
| ENSMUSG00000029700  | 0.313637852   | -0.072948217 | 0.169158138 | 0.680861083 | 0.999071534 | Slc13a1       | Slc13a1  | SLC13A1       | 0.631620302 | 0.5336104   | 1.548365068 | 0.555056852 | 0.523220493 | 0.509335131 | 0.19414588  | 1.105319238 | 0.785686551 | 1.699333077 |
| ENSMUSG00000052353  | -0.205364717  | 2.529880463  | 0.169122562 | 0.680892795 | 0.999071534 | 9930013L23Rik | Cemip    | CEMIP         | 7.088183388 | 13.04380977 | 2.423527932 | 4.856747458 | 4.054958819 | 10.55051342 | 3.624056435 | 2.141556024 | 5.814080477 | 3.790819941 |
| ENSMUSG00000023348  | -0.09134606   | 6.085989953  | 0.169026637 | 0.680978319 | 0.999071534 | Trip6         | Trip6    | TRIP6         | 86.04072112 | 93.79685025 | 56.01042332 | 57.2402379  | 71.55040239 | 73.99911827 | 61.09123704 | 74.53996613 | 43.13419165 | 66.99293862 |
| ENSMUSG00000059149  | -0.233998032  | 2.124168462  | 0.16895123  | 0.681045569 | 0.999071534 | Mfsd4         | Mfsd4a   | MFSD4A        | 7.649623656 | 7.707705773 | 1.95228639  | 2.289609516 | 4.316569065 | 10.47775126 | 4.918362304 | 2.486968286 | 1.178529826 | 1.30717929  |
| ENSMUSG00000033855  | -0.247431376  | 2.360953719  | 0.168917851 | 0.681075344 | 0.999071534 | Ston1         | Ston1    | STON1-GTF2AII | 4.210802013 | 13.99245048 | 1.750325729 | 1.595788451 | 6.932671529 | 12.95166475 | 4.724216424 | 2.417885834 | 1.571373102 | 2.418281687 |
| ENSMUSG00000024054  | 0.08758033    | 5.812022285  | 0.168750704 | 0.681224492 | 0.999071534 | Smchd1        | Smchd1   | SMCHD1        | 57.26690737 | 56.50341232 | 58.83787258 | 48.22056405 | 61.93622583 | 97.13748563 | 54.49027711 | 44.62726425 | 42.74134837 | 47.77740305 |
| ENSMUSG00000047371  | -0.118414276  | 3.826759255  | 0.168707647 | 0.681262926 | 0.999071534 | Zfp768        | Zfp768   | ZNF768        | 13.47456644 | 17.90559341 | 15.01240914 | 9.64411281  | 20.40559922 | 17.9722539  | 13.20191987 | 13.74740803 | 8.17114013  | 13.26786979 |
| ENSMUSG00000042535  | 0.114449921   | 4.974225983  | 0.16866828  | 0.681298071 | 0.999071534 | Gtbpbp1       | Gtbpbp1  | GTPBP1        | 39.30081878 | 37.47130807 | 23.1581558  | 21.36968882 | 35.84060375 | 64.17622646 | 27.89229149 | 21.55372515 | 17.6779474  | 33.72522568 |
| ENSMUSG00000072972  | 0.318485679   | 0.28419628   | 0.168509412 | 0.681439952 | 0.999071534 | Adam4         | Adam4    |               | 0.771980369 | 0.355740266 | 2.086926831 | 1.248877918 | 0.523220493 | 0.654859454 | 1.164875283 | 0.138164905 | 1.257098482 | 2.483640651 |
| ENSMUSG00000006542  | 0.291781838   | 0.399997338  | 0.168378195 | 0.681557198 | 0.999071534 | Prkag3        | Prkag3   | PRKAG3        | 2.526481208 | 0.652190488 | 0.538561763 | 0.693821065 | 1.24264867  | 1.600767553 | 0.711868228 | 0.552659619 | 2.592765618 | 0.653589645 |
| ENSMUSG00000042348  | -0.11463881   | 4.141661393  | 0.168334004 | 0.681596695 | 0.999071534 | Arl15         | Arl15    | ARL15         | 18.31698875 | 19.86216488 | 16.42613376 | 16.79046978 | 23.41411705 | 25.61228086 | 20.77360921 | 17.33969555 | 8.956826681 | 11.045665   |
| ENSMUSG00000026018  | 0.430178784   | -0.477077642 | 0.168290236 | 0.68163582  | 0.999071534 | Ica1l         | Ica1l    | ICA1L         | 1.19306057  | 1.067220799 | 0.403921322 | 0           | 0           | 0.436572969 | 0.258861174 | 0.345412262 | 1.335667137 | 0.71894861  |
| ENSMUSG000000028128 | -0.175447608  | 6.69458151   | 0.168288019 | 0.681637802 | 0.999071534 | F3            | F3       | F3            | 46.95044244 | 186.5264797 | 144.6711535 | 96.64927442 | 94.24509126 | 37.76356183 | 58.76148648 | 215.9517462 | 63.48347332 | 79.93401359 |
| ENSMUSG00000018548  | -0.118012813  | 5.185348321  | 0.168167324 | 0.681745727 | 0.999071534 | Trim37        | Trim37   | TRIM37        | 50.03836392 | 37.47130807 | 28.34181276 | 38.43768703 | 41.98844454 | 67.30499941 | 45.6889972  | 20.03391119 | 17.59937874 | 26.01286787 |
| ENSMUSG000000056155 | 0.576908958   | -1.059303441 | 0.168063924 | 0.681838223 | 0.999071534 | Nanos3        | Nanos3   | NANOS3        | 0           | 0           | 0.269280881 | 1.110113705 | 0           | 0           | 0.258861174 | 0.483577167 | 0.078568655 | 1.176461361 |
| ENSMUSG00000022415  | -0.194552251  | 2.337566719  | 0.168063722 | 0.681838403 | 0.999071534 | Syngnr1       | Syngnr1  | SYNGR1        | 5.54422265  | 6.403324796 | 3.702612119 | 5.82809695  | 5.75542542  | 4.584016176 | 9.448432848 | 4.973936572 | 1.178529826 | 2.483640651 |
| ENSMUSG000000041781 | 0.094235348   | 5.671113733  | 0.167869377 | 0.682012343 | 0.999071534 | Cpsf2         | Cpsf2    | CPSF2         | 57.61780754 | 43.81534282 | 56.27970421 | 45.584044   | 52.25664672 | 79.31075606 | 62.70911938 | 35.16296827 | 44.54842744 | 36.07814841 |
| ENSMUSG000000057626 | 0.251566275   | 1.107017649  | 0.167849132 | 0.68203047  | 0.999071534 | Gm5621        | Gm5621   |               | 2.666841275 | 2.845922132 | 0.201960661 | 1.318260024 | 2.616102464 | 1.382481069 | 3.235764674 | 2.694215643 | 1.257098482 | 1.960768935 |
| ENSMUSG000000047115 | -0.2304448586 | 1.089139104  | 0.167837371 | 0.682041    | 0.999071534 | Fam221a       | Fam221a  | FAM221A       | 1.403600671 | 2.668051998 | 3.971893    | 2.01208109  | 1.046440986 | 3.34705943  | 1.747312924 | 2.279720929 | 0.628549241 | 1.241820326 |
| ENSMUSG00000078087  | 0.133893275   | 11.58016464  | 0.167825061 | 0.682052023 | 0.999071534 | Rps12l1       | Rps12l1  |               | 4501.136811 | 2175.588889 | 2544.502368 | 3644.642057 | 2243.046252 | 1853.907113 | 4537.836379 | 2971.236277 | 2867.048793 | 2887.559052 |

|                     |              |              |             |             |             |              |         |         |             |             |             |             |             |             |             |             |             |             |
|---------------------|--------------|--------------|-------------|-------------|-------------|--------------|---------|---------|-------------|-------------|-------------|-------------|-------------|-------------|-------------|-------------|-------------|-------------|
| ENSMUSG00000035711  | -0.124808636 | 4.185713398  | 0.167812647 | 0.682063139 | 0.999071534 | Dok3         | Dok3    | DOK3    | 24.35247164 | 11.97658897 | 21.94639183 | 19.91266458 | 19.62076848 | 21.46483765 | 11.58403753 | 15.8198816  | 9.192532646 | 27.05861131 |
| ENSMUSG00000041889  | 0.09154104   | 5.680837809  | 0.167705319 | 0.682159267 | 0.999071534 | Shisa4       | Shisa4  | SHISA4  | 46.95044244 | 37.47130807 | 55.87578288 | 55.57506735 | 60.82438228 | 54.71714546 | 45.43013602 | 41.9330486  | 50.99105716 | 59.67273459 |
| ENSMUSG000000021702 | -0.125833126 | 7.903447664  | 0.167658957 | 0.682200803 | 0.999071534 | Thbs4        | Thbs4   | THBS4   | 175.3097238 | 354.1394352 | 237.9096587 | 241.0334382 | 288.6869069 | 212.611036  | 133.3135046 | 351.0770231 | 171.75108   | 228.1681451 |
| ENSMUSG00000018659  | 0.125651461  | 3.671816944  | 0.167623818 | 0.682232287 | 0.999071534 | Pnp0         | Pnp0    | PNPO    | 12.84294614 | 10.67220799 | 16.08953266 | 8.395234892 | 14.91178404 | 18.77263767 | 15.14337867 | 7.737234668 | 10.92104306 | 11.9606905  |
| ENSMUSG00000027068  | -0.14230464  | 3.579921218  | 0.167537393 | 0.682309743 | 0.999071534 | Dhrs9        | Dhrs9   | DHRS9   | 11.43934547 | 22.41163679 | 14.06992605 | 6.105625376 | 10.79142266 | 16.58977283 | 9.577863435 | 12.50392388 | 8.01400282  | 8.627383315 |
| ENSMUSG00000038902  | 0.105729313  | 5.009231229  | 0.167499477 | 0.682343731 | 0.999071534 | Pogz         | Pogz    | POGZ    | 27.79129328 | 32.25378416 | 34.60259326 | 34.20537853 | 31.13161932 | 40.52852397 | 15.59638573 | 34.05764903 | 31.97744262 | 37.84284045 |
| ENSMUSG00000042148  | 0.126635467  | 4.026161107  | 0.167369512 | 0.682460265 | 0.999071534 | Cox10        | Cox10   | COX10   | 16.35194782 | 9.842147372 | 20.46534698 | 16.37417715 | 17.07006858 | 23.79322682 | 11.84289871 | 9.878790692 | 13.90665195 | 23.2024324  |
| ENSMUSG000000090963 | -0.652866695 | -1.045329688 | 0.167334886 | 0.682491322 | 0.999071534 | Gm17655      | Gm17655 | ZNF788  | 1.824680872 | 0.355740266 | 0           | 0           | 0.065402562 | 0.072762162 | 1.229590576 | 0           | 0           | 0           |
| ENSMUSG00000038806  | 0.109920986  | 4.582018416  | 0.167314864 | 0.682509282 | 0.999071534 | Sde2         | Sde2    | SDE2    | 20.91365    | 34.4475158  | 20.06142566 | 17.06799821 | 27.01125794 | 28.01343219 | 25.23896446 | 32.33058772 | 14.29949523 | 20.91486864 |
| ENSMUSG000000021877 | 0.107302984  | 8.822399417  | 0.167206773 | 0.682606262 | 0.999071534 | Arf4         | Arf4    | ARF4    | 376.1649798 | 432.4022939 | 476.9637611 | 473.9491698 | 498.8907399 | 389.7868993 | 519.8579525 | 497.4627397 | 393.9432367 | 439.3429594 |
| ENSMUSG000000056069 | 0.145371899  | 4.772788963  | 0.167190163 | 0.682621167 | 0.999071534 | Fam105a      | Fam105a | FAM105A | 36.21289731 | 31.72017376 | 19.38822346 | 18.24749402 | 29.49655528 | 52.24323197 | 49.24833834 | 13.33291331 | 10.60676844 | 20.32663796 |
| ENSMUSG00000039116  | -0.285135824 | 0.447620997  | 0.167163414 | 0.682645174 | 0.999071534 | Gpr126       | Adgrg6  | ADGRG6  | 1.754500839 | 1.897281421 | 0.403921322 | 0.832585279 | 2.158284533 | 2.692199976 | 1.164875283 | 0.967154334 | 0.628549241 | 0.196076894 |
| ENSMUSG00000025437  | 0.089496814  | 6.081942993  | 0.167036549 | 0.682759063 | 0.999071534 | Usp33        | Usp33   | USP33   | 68.28517264 | 56.32554219 | 71.56139422 | 70.42283815 | 73.12006386 | 62.64822107 | 58.24376413 | 75.99069763 | 55.39090184 | 81.89478252 |
| ENSMUSG00000023266  | 0.206306062  | 2.146250205  | 0.166932449 | 0.682852552 | 0.999071534 | Frs3         | Frs3    | FRS3    | 4.912602348 | 5.869714396 | 3.500651458 | 1.595788451 | 5.035997243 | 3.201535107 | 1.423736457 | 5.595678644 | 3.771295445 | 7.843075741 |
| ENSMUSG000000087502 | -0.266582081 | 0.989820749  | 0.166911736 | 0.682871157 | 0.999071534 | Gm16091      | Gm16091 |         | 4.421342113 | 2.253021687 | 0.605881983 | 2.01208109  | 1.24264867  | 1.746291877 | 2.329750565 | 2.901463001 | 0.864255206 | 0.326794823 |
| ENSMUSG00000022503  | 0.128386613  | 5.114062584  | 0.166844264 | 0.682931775 | 0.999071534 | Nubp1        | Nubp1   | NUBP1   | 59.44248841 | 26.68051998 | 25.91828483 | 33.16464693 | 26.29182976 | 53.04361575 | 58.5673406  | 20.93198308 | 18.22792798 | 29.2808161  |
| ENSMUSG00000016942  | -0.473640975 | -0.656997538 | 0.166788436 | 0.682981942 | 0.999071534 | Tmprs6       | Tmprs6  | TMPRS6  | 0.210540101 | 2.075151554 | 0           | 0.20814632  | 0.523220493 | 0.363810808 | 0.064715293 | 1.036236786 | 0.471411931 | 0           |
| ENSMUSG000000025059 | 0.106510054  | 4.765225338  | 0.166777047 | 0.682992178 | 0.999071534 | Gyk          | Gk      | GK      | 31.72137516 | 25.43542905 | 26.59148704 | 23.79806255 | 28.05769892 | 40.96509694 | 40.05876666 | 17.408778   | 20.8206936  | 19.1501766  |
| ENSMUSG00000036561  | -0.181135543 | 3.228125421  | 0.166756168 | 0.683010943 | 0.999071534 | Ppp6r2       | Ppp6r2  | PPP6R2  | 15.29924731 | 16.24547217 | 5.318297407 | 3.677251647 | 11.05303291 | 17.68120525 | 9.319002261 | 6.493750525 | 3.064177549 | 7.777716776 |
| ENSMUSG00000017548  | 0.088338545  | 6.157914104  | 0.166687705 | 0.683072484 | 0.999071534 | Suz12        | Suz12   | SUZ12   | 71.37309411 | 64.15182805 | 68.59930453 | 68.8270497  | 86.06977106 | 102.3763613 | 82.12370743 | 67.35539108 | 57.0408436  | 50.97999231 |
| ENSMUSG00000004791  | -0.257847573 | 5.078996316  | 0.166666788 | 0.683091289 | 0.999071534 | Pgf          | Pgf     | PGF     | 14.66762701 | 101.8602963 | 35.67971678 | 17.20676242 | 22.04066326 | 4.220205368 | 7.895265804 | 87.9419619  | 15.63516236 | 27.05861131 |
| ENSMUSG000000097739 | 0.225019505  | 2.183988722  | 0.166538633 | 0.683206535 | 0.999071534 | Gm2539       | Gm2539  |         | 4.842422314 | 2.490181865 | 3.433331237 | 5.550568524 | 4.774386997 | 0.873145938 | 2.265035272 | 4.835771668 | 7.778296855 | 5.555511983 |
| ENSMUSG00000028284  | -0.092964069 | 5.437495686  | 0.166493018 | 0.683247568 | 0.999071534 | Map3k7       | Map3k7  | MAP3K7  | 50.59980418 | 54.6061309  | 40.52677265 | 41.90679236 | 44.2775342  | 61.41126432 | 53.584263   | 31.7779281  | 24.43485174 | 36.47030219 |
| ENSMUSG000000062101 | 0.185042673  | 2.084706367  | 0.166440219 | 0.683295072 | 0.999071534 | Zfp119b      | Zfp119b | ZNF788  | 5.123142449 | 1.719411288 | 5.318297407 | 3.885397967 | 3.924153696 | 3.565345915 | 7.183397576 | 3.799534882 | 2.828471584 | 3.725460977 |
| ENSMUSG000000003271 | 0.185840112  | 1.727306623  | 0.166321182 | 0.683402202 | 0.999071534 | Sult2b1      | Sult2b1 | SULT2B1 | 2.877381375 | 3.794562842 | 2.625488593 | 3.052812688 | 3.073920395 | 3.201535107 | 2.9769035   | 2.417885834 | 1.964216377 | 5.882306805 |
| ENSMUSG000000031627 | -0.108124582 | 4.658814746  | 0.166308537 | 0.683413585 | 0.999071534 | Irf2         | Irf2    | IRF2    | 19.15914916 | 28.10348105 | 29.41893629 | 26.78149313 | 31.72024237 | 25.75780518 | 13.8490728  | 30.1890317  | 19.95643839 | 26.60109855 |
| ENSMUSG00000028680  | 0.130503261  | 5.548171367  | 0.166185027 | 0.683524793 | 0.999071534 | Plk3         | Plk3    | PLK3    | 46.66972231 | 69.9622524  | 34.80455392 | 34.34414274 | 46.56662386 | 38.56394561 | 26.08026327 | 85.86948833 | 24.90626367 | 59.60737563 |
| ENSMUSG00000038671  | 0.108268746  | 4.492673897  | 0.166182806 | 0.683526793 | 0.999071534 | Arfrp1       | Arfrp1  | ARFRP1  | 27.44039311 | 25.19826887 | 15.887572   | 24.56126572 | 18.63973005 | 27.21304841 | 27.05099267 | 26.73490908 | 11.5495923  | 21.63381725 |
| ENSMUSG000000056962 | -0.099539745 | 5.984277743  | 0.166166371 | 0.683541594 | 0.999071534 | Jmjd6        | Jmjd6   | JMJD6   | 70.46075368 | 88.16429603 | 58.63591192 | 45.72280822 | 78.35226879 | 58.86458867 | 64.26228642 | 76.40519235 | 31.50603069 | 66.14327208 |
| ENSMUSG000000037325 | 0.143593838  | 2.934889416  | 0.166103352 | 0.683598358 | 0.999071534 | Bbs7         | Bbs7    | BBS7    | 7.860163757 | 5.158233863 | 8.011106221 | 6.105625376 | 10.07199449 | 10.11394045 | 9.966155196 | 7.115492597 | 4.635550651 | 6.993409202 |
| ENSMUSG000000074220 | 0.224131077  | 0.888488196  | 0.165911303 | 0.683771425 | 0.999071534 | Zfp382       | Zfp382  | ZNF382  | 1.473780704 | 2.01586151  | 1.077123525 | 2.358991623 | 1.24264867  | 3.565345915 | 1.164875283 | 1.865226215 | 1.571373102 | 1.045743432 |
| ENSMUSG00000039623  | 0.118426109  | 4.513456632  | 0.165891896 | 0.683788919 | 0.999071534 | Ap5z1        | Ap5z1   | AP5Z1   | 26.66841275 | 18.32062372 | 19.65750434 | 24.83879414 | 23.41411705 | 19.64578361 | 12.29590576 | 27.2875687  | 21.5278115  | 31.50302089 |
| ENSMUSG00000026578  | -0.145305415 | 3.131414207  | 0.165875951 | 0.683803295 | 0.999071534 | Ccdc181      | Ccdc181 | CCDC181 | 9.12340436  | 9.723567283 | 5.99149961  | 9.227820171 | 13.08051232 | 6.403070214 | 7.571689337 | 10.98410993 | 5.185531236 | 9.215613995 |
| ENSMUSG000000073542 | 0.1200209    | 3.838292902  | 0.165786892 | 0.6838836   | 0.999071534 | Cep76        | Cep76   | CEP76   | 18.73806896 | 12.03587901 | 15.5509709  | 11.03175494 | 13.40752513 | 22.62903223 | 18.31442805 | 11.95126426 | 10.05678785 | 10.1306395  |
| ENSMUSG000000045349 | -0.145147748 | 3.296968164  | 0.165701383 | 0.683960728 | 0.999071534 | Sh2d5        | Sh2d5   | SH2D5   | 12.1411458  | 15.05967128 | 6.058819831 | 9.574730704 | 10.13739705 | 6.69411886  | 6.859821109 | 10.50053276 | 7.621159544 | 12.09140843 |
| ENSMUSG000000052384 | -0.106048009 | 5.201199226  | 0.165664438 | 0.683994059 | 0.999071534 | Nrros        | Nrros   | NRROS   | 47.30134261 | 31.12727331 | 38.43984582 | 39.27027231 | 41.26901637 | 56.24515086 | 49.83077598 | 22.93537419 | 17.99222202 | 29.99976471 |
| ENSMUSG00000020783  | -0.104111388 | 4.703127935  | 0.165490946 | 0.684150639 | 0.999071534 | 120001411Rik | Ncbp3   | NCBP3   | 30.87921476 | 38.36065873 | 26.92808814 | 18.66378666 | 25.24538878 | 38.63670777 | 28.53944442 | 20.10299365 | 18.22792798 | 17.97371524 |
| ENSMUSG00000027287  | 0.113113668  | 5.594297547  | 0.165416435 | 0.684217915 | 0.999071534 | Snap23       | Snap23  | SNAP23  | 61.19698925 | 66.99775018 | 30.83266092 | 35.80116698 | 46.8282341  | 46.56778337 | 84.45345799 | 40.13690484 | 33.54881573 | 38.03891734 |
| ENSMUSG000000061833 | -0.30129535  | 8.23280575   | 0.165378695 | 0.684251998 | 0.999071534 | Gm6311       | Gm6311  |         | 16.98356812 | 50.10008752 | 724.5675315 | 592.592572  | 305.3645601 | 42.63862665 | 63.16212644 | 378.2955093 | 254.1695992 | 501.2378988 |

|                     |              |              |             |             |             |               |               |               |             |             |             |             |             |             |             |             |             |             |
|---------------------|--------------|--------------|-------------|-------------|-------------|---------------|---------------|---------------|-------------|-------------|-------------|-------------|-------------|-------------|-------------|-------------|-------------|-------------|
| ENSMUSG00000000399  | 0.096001692  | 6.441346794  | 0.165320362 | 0.684304686 | 0.999071534 | Ndufa9        | Ndufa9        | RP11-234824.6 | 97.83096676 | 76.3655772  | 90.88229746 | 86.93577951 | 83.25746091 | 98.5199667  | 131.2426152 | 58.16742492 | 65.21198373 | 83.39803871 |
| ENSMUSG000000003731 | -0.08816709  | 5.572946905  | 0.165278964 | 0.684342085 | 0.999071534 | Kpna6         | Kpna6         | KPNA6         | 40.35351929 | 54.84329108 | 52.84637297 | 41.3517355  | 65.27175647 | 65.48594537 | 36.82300199 | 47.11423253 | 36.22015    | 39.67289145 |
| ENSMUSG000000097819 | -0.360732113 | 0.565011301  | 0.165200609 | 0.684412886 | 0.999071534 | Gm26813       | Gm26813       |               | 0.701800335 | 0.474320355 | 5.385617627 | 0           | 1.373453794 | 0.436572969 | 0.647152935 | 1.796143762 | 1.649941757 | 0.849666539 |
| ENSMUSG000000054499 | -0.153527034 | 3.324917959  | 0.16503902  | 0.684558958 | 0.999071534 | Dedd2         | Dedd2         | DEDD2         | 10.80772517 | 17.25340292 | 9.82875217  | 5.61995063  | 10.92222779 | 7.057929668 | 6.536244641 | 15.47446934 | 6.835472994 | 8.692742279 |
| ENSMUSG000000087424 | 0.297329729  | -0.037850487 | 0.164910954 | 0.684674785 | 0.999071534 | 5730405O15Rik | 5730405O15Rik |               | 0.631620302 | 0.652190488 | 1.144443746 | 0.971349492 | 0.523220493 | 0.363810808 | 0.453007054 | 1.657978857 | 1.178529826 | 0.653589645 |
| ENSMUSG000000073008 | -0.323279563 | -0.133860308 | 0.164909365 | 0.684676222 | 0.999071534 | Gpr174        | Gpr174        | GPR174        | 1.965040939 | 1.007930755 | 1.009803305 | 0.20814632  | 0.327012808 | 0.363810808 | 1.359021163 | 0.759906976 | 0.235705965 | 0.588230681 |
| ENSMUSG000000034064 | 0.130748687  | 4.74991276   | 0.164808244 | 0.684767718 | 0.999071534 | Poglut1       | Poglut1       | POGLUT1       | 36.35325737 | 32.90597465 | 14.67580803 | 23.03485937 | 26.29182976 | 39.07328074 | 47.95403247 | 15.05997462 | 13.98522061 | 23.46386826 |
| ENSMUSG000000026411 | -0.108622947 | 5.210711948  | 0.164777708 | 0.684795353 | 0.999071534 | Tmem9         | Tmem9         | TMEM9         | 48.14350301 | 45.23830388 | 29.62089695 | 31.91576901 | 44.80075469 | 39.50985371 | 56.69059709 | 34.05764903 | 16.34228026 | 28.3657906  |
| ENSMUSG000000033126 | 0.181905807  | 2.070575256  | 0.164758274 | 0.684812943 | 0.999071534 | Ybey          | Ybey          | YBEY          | 5.965302851 | 2.253021687 | 4.375814322 | 2.497755836 | 4.839789558 | 5.093351307 | 4.27120937  | 2.556050739 | 2.671334273 | 6.601255415 |
| ENSMUSG000000057110 | 0.118420754  | 4.163292282  | 0.164708659 | 0.684857855 | 0.999071534 | Cep110        | Cntrl         | CNTRL         | 22.8085109  | 13.63671021 | 18.10913927 | 13.59889288 | 20.79801459 | 25.24847005 | 10.80745401 | 14.23098519 | 14.53520119 | 25.75143201 |
| ENSMUSG000000026723 | 0.194802991  | 2.114280768  | 0.164697489 | 0.684867967 | 0.999071534 | Trdmt1        | Trdmt1        | TRDMT1        | 5.123142449 | 4.802493597 | 2.827449254 | 2.775284262 | 4.90519212  | 4.438491853 | 8.995425794 | 3.937699786 | 1.178529826 | 3.594743048 |
| ENSMUSG000000098457 | 0.310777022  | 1.434405348  | 0.164656686 | 0.684904909 | 0.999071534 | mmu-mir-8097  | Mir8097       |               | 2.456301174 | 0           | 4.981696305 | 2.914048475 | 1.504258917 | 1.309718907 | 0.776583522 | 5.112101477 | 2.749902928 | 3.33330719  |
| ENSMUSG000000044149 | 0.129691008  | 3.507583196  | 0.164551099 | 0.685000531 | 0.999071534 | Nkrf          | Nkrf          | NKRF          | 9.053224327 | 10.0200175  | 16.29149332 | 9.505348597 | 10.85682522 | 19.64578361 | 11.84289871 | 8.566224097 | 8.01400282  | 10.39207536 |
| ENSMUSG000000069744 | -0.110211557 | 7.791810875  | 0.164514718 | 0.685033487 | 0.999071534 | Psmb3         | Psmb3         | PSMB3         | 243.3843563 | 150.7745829 | 327.9167933 | 236.5236012 | 232.8331193 | 221.4880197 | 218.2199696 | 164.1399069 | 195.9502258 | 222.9394279 |
| ENSMUSG000000001383 | -0.079532967 | 5.909817892  | 0.164466931 | 0.685076781 | 0.999071534 | Zmat2         | Zmat2         | ZMAT2         | 58.24942784 | 64.50756831 | 68.86858541 | 62.37451379 | 65.79497697 | 72.47111288 | 55.65515239 | 50.08477799 | 51.14819447 | 53.398274   |
| ENSMUSG000000034911 | -0.158526609 | 2.862191053  | 0.1642039   | 0.685315214 | 0.999071534 | Ushbp1        | Ushbp1        | USHBP1        | 11.15862533 | 4.802493597 | 11.51175768 | 4.509836926 | 7.325086899 | 7.567264798 | 5.112508185 | 5.319348834 | 6.992610304 | 7.320204025 |
| ENSMUSG000000050229 | 0.093016008  | 4.404335227  | 0.164188327 | 0.685329337 | 0.999071534 | Pigm          | Pigm          | PIGM          | 23.79103137 | 22.05589652 | 18.91698192 | 18.80255087 | 22.36767607 | 24.88465924 | 23.23279036 | 20.10299365 | 17.59937874 | 19.41161246 |
| ENSMUSG000000092036 | 0.61765568   | -0.799175184 | 0.164144512 | 0.685369079 | 0.999071534 | Gm2244        | Gm2244        |               | 0           | 0           | 1.211763966 | 0.624438959 | 0           | 0.145524323 | 0           | 0           | 1.257098482 | 1.045743432 |
| ENSMUSG000000028156 | 0.106623805  | 7.441881423  | 0.164060831 | 0.685444997 | 0.999071534 | Elf4e         | Elf4e         | EIF4E         | 202.6799369 | 156.4071371 | 170.5221181 | 166.8639663 | 172.6627626 | 209.7005495 | 261.8380774 | 109.2884397 | 131.9167719 | 166.7307185 |
| ENSMUSG000000021709 | -0.098549954 | 6.860624405  | 0.163922491 | 0.685570552 | 0.999071534 | Erbp2ip       | Erbp2ip       | ERBIN         | 101.3399684 | 156.8221675 | 89.06465151 | 120.1698085 | 156.7045376 | 134.7555231 | 89.82482735 | 133.1218858 | 82.49708785 | 104.901138  |
| ENSMUSG000000047454 | -0.129985121 | 3.17870946   | 0.163919379 | 0.685573378 | 0.999071534 | Gphn          | Gphn          | GPHN          | 10.94808523 | 11.0872383  | 8.953589305 | 7.146356975 | 10.46440986 | 12.00575665 | 7.830550511 | 6.35558562  | 7.542590889 | 7.843075741 |
| ENSMUSG000000050490 | -0.366324344 | -0.322015133 | 0.163910073 | 0.685581826 | 0.999071534 | Gm8394        | Gm8394        | PSMA5         | 1.333420637 | 0.5336104   | 0           | 0.971349492 | 1.046440986 | 1.018670261 | 0.776583522 | 0.828989429 | 0.15713731  | 0.130717929 |
| ENSMUSG000000079215 | -0.135089165 | 5.201768028  | 0.163814519 | 0.685668589 | 0.999071534 | Zfp664        | Zfp664        | ZNF664        | 50.17872398 | 61.66164618 | 24.30259954 | 26.64272891 | 37.86808316 | 70.65205884 | 46.91858777 | 23.55711627 | 13.35667137 | 24.64032962 |
| ENSMUSG000000019214 | 0.131678102  | 3.732294229  | 0.163685529 | 0.68578576  | 0.999071534 | Chtf18        | Chtf18        | CHTF18        | 18.45734882 | 9.367827016 | 14.8777687  | 9.227820171 | 13.60373281 | 26.48542679 | 12.03704459 | 8.151729382 | 10.21392516 | 12.09140843 |
| ENSMUSG000000028910 | -0.144468907 | 4.033193505  | 0.163682693 | 0.685788337 | 0.999071534 | Mecr          | Mecr          | MECR          | 24.42265167 | 15.53399163 | 16.5607742  | 17.34552664 | 14.71557636 | 27.57685922 | 23.62108212 | 6.908245239 | 5.578374512 | 14.83648494 |
| ENSMUSG000000081911 | -0.737319106 | -0.44104377  | 0.163650009 | 0.685818035 | 0.999071534 | Mrps36-ps2    | Mrps36-ps2    |               | 0           | 0.652190488 | 0           | 0           | 3.27012808  | 0           | 2.135604685 | 0           | 0           | 0           |
| ENSMUSG000000006386 | 0.178215054  | 2.564848132  | 0.163637986 | 0.68582896  | 0.999071534 | Tek           | Tek           | TEK           | 5.895122818 | 4.743203553 | 8.415027543 | 4.371072713 | 4.774386997 | 12.15128097 | 8.412988152 | 2.072473572 | 3.535589479 | 4.967281302 |
| ENSMUSG000000018417 | 0.093165553  | 6.678922026  | 0.1634348   | 0.686013668 | 0.999071534 | Myo1b         | Myo1b         | MYO1B         | 93.40962464 | 108.9158116 | 102.1247743 | 109.5543462 | 98.95407569 | 121.5855719 | 81.60598508 | 87.52746718 | 117.4601394 | 95.68552404 |
| ENSMUSG000000055560 | 0.227481701  | 0.835005069  | 0.163397452 | 0.686047634 | 0.999071534 | Zfp459        | Zfp459        |               | 1.122880537 | 1.126510844 | 1.211763966 | 2.775284262 | 1.569661478 | 1.528005392 | 1.812028217 | 2.556050739 | 0.785686551 | 1.960768935 |
| ENSMUSG000000040940 | -0.092938492 | 6.179925018  | 0.163353126 | 0.686087952 | 0.999071534 | Arhgef1       | Arhgef1       | ARHGEF1       | 92.14638404 | 66.28626965 | 73.64832105 | 70.63098447 | 85.87356338 | 106.8876153 | 48.08346306 | 58.72008453 | 47.84831095 | 84.90129489 |
| ENSMUSG000000029660 | -0.250783915 | 0.694858483  | 0.163341072 | 0.686098917 | 0.999071534 | Tex26         | Tex26         | TEX26         | 0.701800335 | 1.185800888 | 1.750325729 | 3.122194795 | 1.504258917 | 0.873145938 | 0.647152935 | 1.796143762 | 1.257098482 | 1.830051006 |
| ENSMUSG000000029534 | 0.126270377  | 3.884915444  | 0.163310104 | 0.68612709  | 0.999071534 | St7           | St7           | ST7           | 18.31698875 | 14.05174052 | 14.47384737 | 13.7376571  | 12.16487646 | 20.66445387 | 22.7797833  | 9.257048621 | 7.149747614 | 16.2090232  |
| ENSMUSG000000035919 | -0.151951747 | 2.812619705  | 0.16327893  | 0.686155453 | 0.999071534 | Bbs9          | Bbs9          | BBS9          | 9.474304528 | 9.842147372 | 7.068623136 | 4.02416218  | 7.521294584 | 9.895653967 | 6.406814054 | 4.973936572 | 6.285492408 | 4.313691657 |
| ENSMUSG000000039617 | -0.282315299 | 4.647339492  | 0.16325867  | 0.686173888 | 0.999071534 | Gm7488        | Gm7488        |               | 33.12497583 | 43.16315233 | 16.83005509 | 13.46012867 | 36.9524473  | 42.12929152 | 43.6828231  | 21.27739534 | 0           | 9.607767782 |
| ENSMUSG000000033209 | 0.159018708  | 4.238616568  | 0.163190525 | 0.686235905 | 0.999071534 | Ttc28         | Ttc28         | TTC28         | 9.193584394 | 13.81458035 | 24.10063888 | 26.01828996 | 17.92030188 | 15.06176744 | 6.730390522 | 28.04747567 | 23.72773384 | 18.49658695 |
| ENSMUSG000000082894 | -0.223256955 | 1.151111486  | 0.163167835 | 0.686256558 | 0.999071534 | Gm6480        | Gm6480        |               | 1.614140771 | 1.363671021 | 1.615658288 | 4.926129565 | 1.962076848 | 1.45524323  | 1.617882337 | 1.865226215 | 1.571373102 | 2.679717545 |
| ENSMUSG000000096956 | -0.121566335 | 5.577884361  | 0.163037936 | 0.686374826 | 0.999071534 | 0610007N19Rik | Snhg18        |               | 35.65145704 | 50.51511783 | 52.24049099 | 73.33688662 | 43.55810602 | 23.64770249 | 34.94625848 | 59.2036617  | 47.37689902 | 47.18917237 |
| ENSMUSG000000063556 | 0.596162905  | -0.185541008 | 0.163030843 | 0.686381285 | 0.999071534 | Gm10132       | Gm10132       |               | 0           | 0           | 0           | 0.346910533 | 2.746907587 | 0.582097292 | 2.78275762  | 1.036236786 | 0           | 0           |
| ENSMUSG000000008226 | -0.120452086 | 3.630580731  | 0.163000474 | 0.686408944 | 0.999071534 | Scrn3         | Scrn3         | SCRN3         | 11.01826527 | 15.59328168 | 13.66600473 | 11.23990126 | 14.84638148 | 10.69603774 | 16.69654572 | 9.80970824  | 8.32827744  | 11.17638293 |

|                     |              |              |             |             |             |               |               |         |             |             |             |             |             |             |             |             |             |             |
|---------------------|--------------|--------------|-------------|-------------|-------------|---------------|---------------|---------|-------------|-------------|-------------|-------------|-------------|-------------|-------------|-------------|-------------|-------------|
| ENSMUSG00000036912  | -0.257061878 | 0.553111233  | 0.162939447 | 0.686464533 | 0.999071534 | Piwl4         | Piwl4         | PIWL4   | 0.771980369 | 1.541541155 | 3.298690797 | 0.624438959 | 1.308051232 | 1.091432423 | 0.647152935 | 1.588896405 | 0.864255206 | 1.633974113 |
| ENSMUSG00000030754  | 0.09490392   | 7.322052058  | 0.162930565 | 0.686472624 | 0.999071534 | Copb1         | Copb1         | COPB1   | 150.1150917 | 187.5937005 | 139.2855359 | 168.2516084 | 156.5083299 | 171.8642255 | 171.0425207 | 156.05726   | 141.1878732 | 154.5085921 |
| ENSMUSG00000027472  | -0.093605521 | 5.492080437  | 0.162887817 | 0.686511571 | 0.999071534 | Pdrg1         | Pdrg1         | PDRG1   | 56.00366677 | 43.81534282 | 48.06663732 | 46.48601139 | 46.23961105 | 46.85883202 | 64.32700172 | 29.63673208 | 30.32750087 | 40.3264811  |
| ENSMUSG00000029089  | 0.141703324  | 3.328818354  | 0.162868779 | 0.686528919 | 0.999071534 | Pacrgl        | 5730480H06Rik | PACRGL  | 5.54422265  | 8.300606217 | 9.290190407 | 13.8070392  | 11.64165596 | 8.367648575 | 13.65492692 | 10.70778012 | 6.835472994 | 10.52279329 |
| ENSMUSG00000028066  | -0.132081011 | 5.312739741  | 0.162837224 | 0.686557674 | 0.999071534 | Pmf1          | Pmf1          | PMF1    | 67.93427247 | 21.58157616 | 49.07644063 | 38.36830492 | 38.52210878 | 69.56062642 | 52.6135336  | 17.96143762 | 24.19914577 | 25.94750891 |
| ENSMUSG00000039841  | -0.160292509 | 2.74301522   | 0.162690093 | 0.686691794 | 0.999071534 | Zfp800        | Zfp800        | ZNF800  | 8.421604025 | 7.648415729 | 6.732022034 | 5.689332737 | 7.586697145 | 12.00575665 | 8.218842272 | 2.901463001 | 3.299883514 | 4.967281302 |
| ENSMUSG00000008496  | -0.174639794 | 3.361265931  | 0.162658509 | 0.686720594 | 0.999071534 | Pou2f2        | Pou2f2        | POU2F2  | 7.368903522 | 4.861783641 | 13.53136429 | 15.8885024  | 13.73453794 | 8.804221544 | 2.9769035   | 9.671543335 | 10.44963113 | 13.13715187 |
| ENSMUSG00000004098  | -0.111248317 | 7.270590804  | 0.162567092 | 0.686803971 | 0.999071534 | Col5a3        | Col5a3        | COL5A3  | 155.3084142 | 231.8833637 | 178.735185  | 133.491173  | 133.7482385 | 196.5305983 | 95.19619671 | 160.8930316 | 84.38273558 | 194.1814835 |
| ENSMUSG00000025616  | 0.092274525  | 4.836459668  | 0.162406487 | 0.686950518 | 0.999071534 | Usp16         | Usp16         | USP16   | 27.72111325 | 33.73603527 | 25.24508263 | 28.86295632 | 27.27286819 | 41.0378591  | 34.10495966 | 21.20831288 | 22.3920667  | 25.35927823 |
| ENSMUSG00000025967  | -0.124221691 | 9.626941622  | 0.162323507 | 0.687026268 | 0.999071534 | Eef1b2        | Eef1b2        | EEF1B2  | 1272.995628 | 867.5912198 | 674.6832483 | 802.3346801 | 670.3108538 | 816.9007874 | 1281.23338  | 531.9348834 | 441.712979  | 637.184545  |
| ENSMUSG00000023942  | -0.100108075 | 6.028154886  | 0.162090938 | 0.687238692 | 0.999071534 | Sk29a1        | Sk29a1        | SLC29A1 | 75.72425619 | 61.18732583 | 72.97511885 | 77.43043091 | 61.60921302 | 106.305518  | 76.81705336 | 35.71562789 | 41.09140662 | 54.3132995  |
| ENSMUSG000000097195 | 0.092699869  | 5.11322918   | 0.162018856 | 0.687304566 | 0.999071534 | Snhg5         | Snhg5         | SNHG5   | 36.98487768 | 28.81496158 | 42.61369948 | 33.09526482 | 31.58943725 | 29.97801055 | 31.25748675 | 37.99534882 | 30.24893221 | 40.3264811  |
| ENSMUSG00000025409  | 0.129630769  | 5.323220486  | 0.161939856 | 0.687376782 | 0.999071534 | Mbd6          | Mbd6          | MBD6    | 30.38795452 | 40.25794015 | 42.81566014 | 30.31998056 | 54.80734662 | 28.15895651 | 17.66727512 | 68.11529806 | 34.25593362 | 48.75778752 |
| ENSMUSG00000021243  | -0.104106149 | 6.444119369  | 0.161931886 | 0.687384069 | 0.999071534 | Fcf1          | Fcf1          | FCF1    | 130.5348624 | 57.57063312 | 104.2790213 | 97.62062391 | 76.978815   | 86.07763708 | 110.8572977 | 57.20027058 | 67.25476876 | 83.72483353 |
| ENSMUSG000000009291 | -0.105229892 | 8.516401441  | 0.16186238  | 0.687447625 | 0.999071534 | Pttg1ip       | Pttg1ip       | PTTG1IP | 393.9205283 | 449.3592466 | 294.9298853 | 394.6454221 | 438.0663576 | 304.0003108 | 403.4351396 | 344.4451076 | 263.1264259 | 380.0623786 |
| ENSMUSG00000038732  | 0.117092423  | 4.092258588  | 0.161795719 | 0.687508595 | 0.999071534 | Mboat1        | Mboat1        | MBOAT1  | 16.56248792 | 10.90936817 | 22.28299293 | 17.20676242 | 17.2008737  | 30.77839432 | 18.18499747 | 14.23098519 | 11.78529826 | 12.94107497 |
| ENSMUSG00000032939  | 0.104800392  | 5.80319107   | 0.161794064 | 0.687510109 | 0.999071534 | Nup93         | Nup93         | NUP93   | 63.37257029 | 47.55061561 | 61.79996227 | 53.28545783 | 52.71446465 | 100.8483559 | 71.31625341 | 27.01123889 | 38.02722907 | 52.09109471 |
| ENSMUSG00000024975  | -0.131252882 | 3.868665858  | 0.161718594 | 0.687579153 | 0.999071534 | Pdcd4         | Pdcd4         | PDCD4   | 12.42186594 | 14.8225111  | 14.00260583 | 23.52053412 | 13.01510976 | 15.42557824 | 7.506974044 | 12.57300634 | 16.02800564 | 14.11753633 |
| ENSMUSG00000034111  | 0.124137198  | 3.802335027  | 0.161597566 | 0.687689916 | 0.999071534 | Tmed8         | Tmed8         | TMED8   | 14.59744698 | 15.94902195 | 13.59868451 | 11.93372233 | 12.68809695 | 28.01343219 | 13.26663516 | 8.013564478 | 9.742513232 | 13.52930565 |
| ENSMUSG000000074272 | 0.239635969  | 0.84145598   | 0.161454886 | 0.687820556 | 0.999071534 | Ceacam1       | Ceacam1       | CEACAM3 | 2.456301174 | 1.422961066 | 1.481044848 | 0.693821065 | 1.896674286 | 3.34705943  | 1.812028217 | 2.279720929 | 0.31427462  | 1.372538255 |
| ENSMUSG00000040459  | 0.087018911  | 6.35572105   | 0.161417823 | 0.687854502 | 0.999071534 | Arglu1        | Arglu1        | ARGLU1  | 84.70730049 | 73.28249489 | 96.53719597 | 79.23436568 | 77.63284061 | 112.7813504 | 66.78618287 | 65.49016487 | 69.14041649 | 96.8619854  |
| ENSMUSG00000019987  | -0.173116057 | 6.952336291  | 0.161410755 | 0.687860976 | 0.999071534 | Arg1          | Arg1          | ARG1    | 184.0120479 | 191.9811638 | 106.3659481 | 81.80150362 | 121.6487646 | 30.48734568 | 108.2039707 | 261.4770823 | 56.09801974 | 91.89470409 |
| ENSMUSG00000024486  | 0.085686574  | 6.371709682  | 0.161349834 | 0.687916786 | 0.999071534 | Hbegf         | Hbegf         | HBEGF   | 77.1980369  | 102.4531967 | 85.22739895 | 73.40626873 | 78.54847648 | 101.4304532 | 84.00045094 | 94.91928959 | 68.11902397 | 64.24786211 |
| ENSMUSG00000017716  | 0.130002146  | 6.812395107  | 0.161329816 | 0.687935127 | 0.999071534 | Birc5         | Birc5         | BIRC5   | 144.7112292 | 51.16730832 | 131.2071094 | 123.7776781 | 104.2516832 | 158.6942743 | 177.9023418 | 49.73936572 | 83.12563709 | 108.8880349 |
| ENSMUSG00000023903  | -0.378384556 | -0.292644342 | 0.161323409 | 0.687940998 | 0.999071534 | Mmp25         | Mmp25         | MMP25   | 1.333420637 | 1.363671021 | 0.471241542 | 0           | 0.850233301 | 0.582097292 | 0.647152935 | 0.690824524 | 0           | 0.980384468 |
| ENSMUSG00000032096  | 0.088486984  | 6.980274942  | 0.161314592 | 0.687949077 | 0.999071534 | Arcn1         | Arcn1         | ARCN1   | 116.7093958 | 147.3950504 | 129.7260646 | 116.6313211 | 124.5264773 | 170.1179336 | 131.1778999 | 109.6338519 | 107.7961948 | 114.6396237 |
| ENSMUSG00000021676  | -0.230739217 | 1.129196057  | 0.161245055 | 0.688012803 | 0.999071534 | Iqgap2        | Iqgap2        | IQGAP2  | 2.526481208 | 2.668051998 | 2.221567271 | 1.80393477  | 2.289089656 | 4.438491853 | 2.9769035   | 1.036236786 | 0.471411931 | 0.849666539 |
| ENSMUSG00000028706  | 0.131318226  | 3.250085401  | 0.161230257 | 0.688026366 | 0.999071534 | Nsun4         | Nsun4         | NSUN4   | 10.31646493 | 9.189956883 | 9.76143195  | 8.325852786 | 8.960150939 | 11.64194584 | 13.78435751 | 9.671543335 | 4.949825271 | 8.235229528 |
| ENSMUSG00000032855  | 0.091545342  | 6.406040917  | 0.161100239 | 0.688145567 | 0.999071534 | Pkd1          | Pkd1          | PKD1    | 65.19725116 | 103.7575777 | 77.41825339 | 82.84223522 | 96.40337579 | 107.3969504 | 59.99107706 | 84.00426211 | 72.04745672 | 100.3913695 |
| ENSMUSG00000054000  | -0.133943008 | 3.346461372  | 0.161038635 | 0.688202065 | 0.999071534 | Tusc1         | Tusc1         | TUSC1   | 11.7200656  | 6.699775018 | 15.28169002 | 11.03175494 | 9.679579116 | 11.27813504 | 6.342098761 | 10.50053276 | 7.385453579 | 10.91494707 |
| ENSMUSG00000000223  | 0.355098651  | -0.145775225 | 0.160992686 | 0.688244215 | 0.999071534 | Drp2          | Drp2          | DRP2    | 0.561440268 | 0.355740266 | 1.88496617  | 0           | 0.784830739 | 0.873145938 | 0.453007054 | 0.759906976 | 1.571373102 | 0.392153787 |
| ENSMUSG000000027163 | -0.09296311  | 4.474445196  | 0.160960679 | 0.688273579 | 0.999071534 | Commdd9       | Commdd9       | COMMD9  | 23.72085134 | 22.23376665 | 25.11044219 | 23.24300569 | 24.06814267 | 22.99284304 | 20.51474803 | 23.55711627 | 14.22092657 | 22.61420172 |
| ENSMUSG00000037960  | -0.109337587 | 5.458972811  | 0.160904699 | 0.688324945 | 0.999071534 | 1110007C09Rik | Card19        | CARD19  | 39.37099882 | 57.09631276 | 37.63200317 | 41.21297129 | 61.67461558 | 36.81765373 | 43.16510075 | 62.03604225 | 18.46363395 | 44.83624965 |
| ENSMUSG00000028464  | -0.110400015 | 7.233090025  | 0.16084786  | 0.68837711  | 0.999071534 | Tpm2          | Tpm2          | TPM2    | 142.0443879 | 111.3467034 | 210.8469301 | 184.4870213 | 157.8163811 | 119.0388963 | 117.8465494 | 126.904465  | 152.8160342 | 165.8156929 |
| ENSMUSG00000030890  | 0.095544407  | 7.414717816  | 0.160763627 | 0.688454435 | 0.999071534 | Ilk           | Ilk           | ILK     | 180.011786  | 167.4350854 | 148.4410859 | 163.3948609 | 197.7119437 | 213.1203711 | 211.4248638 | 164.6925665 | 114.3959618 | 159.0183606 |
| ENSMUSG00000021044  | -0.20945138  | 2.399458927  | 0.160754245 | 0.688463049 | 0.999071534 | Adck1         | Adck1         | ADCK1   | 5.333682549 | 7.944865951 | 5.520258068 | 3.538487434 | 6.409451036 | 9.968416129 | 6.600959935 | 2.348803381 | 0.471411931 | 5.359435089 |
| ENSMUSG00000096210  | -0.10339365  | 7.487976291  | 0.16070704  | 0.688506394 | 0.999071534 | H1f0          | H1f0          | H1F0    | 180.0819661 | 142.4739767 | 254.4031127 | 204.8853606 | 179.6608367 | 158.3304635 | 165.5417207 | 169.3210908 | 153.5231521 | 179.7371524 |
| ENSMUSG00000014859  | 0.089481472  | 5.8177589    | 0.160683192 | 0.688528296 | 0.999071534 | E2f4          | E2f4          | E2F4    | 66.7412119  | 50.98943819 | 58.43395126 | 43.91887345 | 64.15991293 | 93.7904262  | 56.04344415 | 37.23544184 | 43.52703492 | 56.92765808 |
| ENSMUSG00000020792  | -0.088903416 | 4.95280599   | 0.160582549 | 0.688620744 | 0.999071534 | Exoc7         | Exoc7         | EXOC7   | 28.70363372 | 32.8466846  | 34.87187414 | 33.51155746 | 34.85956533 | 26.48542679 | 27.56871502 | 30.67260886 | 24.43485174 | 33.98666154 |

|                     |              |              |             |             |             |               |               |         |             |             |             |             |             |             |             |             |             |             |
|---------------------|--------------|--------------|-------------|-------------|-------------|---------------|---------------|---------|-------------|-------------|-------------|-------------|-------------|-------------|-------------|-------------|-------------|-------------|
| ENSMUSG00000022442  | -0.163763792 | 2.763799177  | 0.160511217 | 0.688686287 | 0.999071534 | TtlI1         | TtlI1         | TTL1    | 12.562226   | 6.699775018 | 5.85685917  | 4.926129565 | 6.736463844 | 12.6606161  | 6.342098761 | 3.385040167 | 3.457020824 | 6.013024734 |
| ENSMUSG000000092260 | -0.191731952 | 1.841993295  | 0.160504634 | 0.688692337 | 0.999071534 | Zfp963        | Zfp963        |         | 3.368646161 | 5.751134307 | 2.760129034 | 2.358991623 | 4.970594681 | 1.673529715 | 3.041618794 | 3.730452429 | 2.042785033 | 4.836563373 |
| ENSMUSG000000037860 | 0.182642394  | 2.096939463  | 0.160449606 | 0.688742913 | 0.999071534 | Aim2          | Aim2          | AIM2    | 3.649361744 | 6.166164618 | 5.92417939  | 1.873316877 | 2.616102464 | 7.348978314 | 4.530070544 | 3.868617334 | 2.042785033 | 4.313691657 |
| ENSMUSG000000074874 | -0.190808569 | 3.938803187  | 0.160418578 | 0.688771435 | 0.999071534 | Ctla2b        | Ctla2b        |         | 30.80903472 | 21.64086621 | 7.87646578  | 12.97445392 | 11.31464316 | 16.22596202 | 35.39926553 | 6.35558562  | 3.928432755 | 9.084896066 |
| ENSMUSG000000054280 | 0.104820947  | 4.441991692  | 0.160312485 | 0.688868982 | 0.999071534 | Prr14l        | Prr14l        | PRR14L  | 16.84320805 | 21.81873634 | 17.03201575 | 29.20986686 | 22.49848119 | 28.01343219 | 16.76126101 | 19.20492177 | 20.58498764 | 23.72530412 |
| ENSMUSG000000032246 | 0.338178356  | 0.63305759   | 0.160289624 | 0.688890007 | 0.999071534 | CalmI4        | CalmI4        | CALML4  | 4.070441945 | 1.067220799 | 0.875162864 | 0           | 0.588623054 | 2.40115133  | 3.494625848 | 1.036236786 | 0.549980586 | 0.457512752 |
| ENSMUSG000000001751 | -0.092900495 | 5.2963293    | 0.160278316 | 0.688900407 | 0.999071534 | Naglu         | Naglu         | NAGLU   | 43.65198086 | 53.89465037 | 28.00521166 | 37.74386596 | 47.08984435 | 40.81957261 | 42.00022547 | 37.09727694 | 34.25593362 | 28.03899577 |
| ENSMUSG000000023030 | 0.138648103  | 5.188012654  | 0.160164225 | 0.689021927 | 0.999071534 | Slc11a2       | Slc11a2       | SLC11A2 | 60.28464881 | 42.74812202 | 26.72612748 | 20.88401407 | 30.41219114 | 64.90384808 | 60.5735147  | 17.47786046 | 15.3994564  | 34.64025119 |
| ENSMUSG000000020776 | 0.105937472  | 5.045462009  | 0.160103484 | 0.689061259 | 0.999071534 | Fbf1          | Fbf1          | FBF1    | 30.03705436 | 26.91768016 | 36.4202392  | 33.44217536 | 37.47566779 | 32.59744836 | 17.73199041 | 32.26150527 | 34.96305152 | 44.44409586 |
| ENSMUSG000000021264 | 0.088854189  | 6.260294649  | 0.159926401 | 0.689224287 | 0.999071534 | Yy1           | Yy1           | YY1     | 68.28517264 | 80.5158803  | 80.64962397 | 77.56919512 | 77.50203549 | 73.92635611 | 69.56894049 | 93.95213526 | 75.11163427 | 62.80996489 |
| ENSMUSG000000042447 | 0.131802232  | 3.640841729  | 0.159908255 | 0.689240998 | 0.999071534 | Mios          | Mios          | MIOS    | 15.29924731 | 12.92522968 | 6.664701814 | 11.37866547 | 15.10799173 | 20.8099782  | 16.17882337 | 8.911636359 | 6.756904338 | 11.9606905  |
| ENSMUSG000000078317 | 0.139229301  | 3.161746042  | 0.159811843 | 0.689329808 | 0.999071534 | F8a           | F8a           | F8A3    | 6.596923153 | 7.707705773 | 11.04051614 | 9.435966491 | 8.633138131 | 9.531843159 | 6.536244641 | 8.08264693  | 6.678335683 | 13.92145944 |
| ENSMUSG000000032226 | -0.300259866 | -0.020297327 | 0.159774746 | 0.689363988 | 0.999071534 | Gcnt3         | Gcnt3         | GCNT3   | 0.491260235 | 0.237160178 | 0.942483085 | 2.150845303 | 0.981038424 | 0.800383777 | 0.582437641 | 0.552659619 | 0.471411931 | 1.30717929  |
| ENSMUSG000000026858 | 0.140184113  | 3.386250421  | 0.159766213 | 0.68937185  | 0.999071534 | Fam73b        | Fam73b        | FAM73B  | 9.544484562 | 9.842147372 | 11.30979702 | 9.227820171 | 11.11843547 | 18.69987551 | 11.84289871 | 6.424668073 | 4.16413872  | 13.66002358 |
| ENSMUSG000000029056 | 0.101081015  | 4.351991371  | 0.159745955 | 0.689390518 | 0.999071534 | Pank4         | Pank4         | PANK4   | 27.72111325 | 16.9569527  | 20.33070654 | 18.24749402 | 18.57432749 | 20.30064306 | 19.15572687 | 24.10977589 | 14.6923385  | 23.13707343 |
| ENSMUSG000000039163 | 0.12144053   | 5.529028319  | 0.159734029 | 0.689401508 | 0.999071534 | Cmc1          | Cmc1          | CMC1    | 35.86199714 | 30.29721269 | 57.69342883 | 66.19052965 | 36.56003193 | 29.39591325 | 34.10495966 | 53.95339532 | 50.0482333  | 56.86229912 |
| ENSMUSG000000021147 | 0.094475112  | 4.410025462  | 0.15957022  | 0.689552514 | 0.999071534 | Wdr37         | Wdr37         | WDR37   | 19.22932919 | 22.88595714 | 25.24508263 | 19.49637194 | 19.16295055 | 26.33990247 | 23.75051271 | 18.44501479 | 18.46363395 | 18.82338178 |
| ENSMUSG000000085995 | 0.454576771  | -0.636095447 | 0.159544381 | 0.689576341 | 0.999071534 | Gm2788        | Gm2788        |         | 0.210540101 | 0.652190488 | 0           | 0.971349492 | 0.327012808 | 1.164194584 | 1.617882337 | 0.069082452 | 0.15713731  | 0           |
| ENSMUSG000000051220 | 0.131136406  | 4.629198888  | 0.159486316 | 0.689629894 | 0.999071534 | Erccl6l       | Erccl6l       | ERCC6L  | 28.63345369 | 16.00831199 | 25.31240285 | 25.18570468 | 26.81505025 | 44.53044285 | 41.41778783 | 11.12227484 | 15.24231909 | 17.05868974 |
| ENSMUSG000000033460 | 0.139105294  | 4.641181019  | 0.15942874  | 0.689683007 | 0.999071534 | Armccx1       | Armccx1       | ARMCX1  | 15.08870721 | 23.24169741 | 28.81305431 | 28.37728158 | 26.55344001 | 14.69795663 | 12.9430587  | 39.16975051 | 31.34889338 | 21.89525311 |
| ENSMUSG000000074170 | 0.111251376  | 3.746055388  | 0.159412533 | 0.68969796  | 0.999071534 | Plekhl1       | Plekhl1       | PLEKHF1 | 15.08870721 | 14.70393101 | 10.50195437 | 12.28063286 | 13.86534306 | 19.06368632 | 16.11410808 | 12.57300634 | 9.349669957 | 10.78422914 |
| ENSMUSG000000049881 | 0.090028066  | 6.25488019   | 0.159360737 | 0.689745754 | 0.999071534 | 2810025M15Rik | 2810025M15Rik |         | 85.47928085 | 50.69298797 | 92.90190407 | 74.51638243 | 79.66032002 | 83.9675344  | 82.70614507 | 62.58870187 | 69.37612245 | 79.93401359 |
| ENSMUSG000000036368 | -0.181866967 | 2.013832392  | 0.159230683 | 0.689865798 | 0.999071534 | Rmdn2         | Rmdn2         | RMDN2   | 4.000261912 | 4.683913508 | 6.933982695 | 3.052812688 | 2.87771271  | 6.985167506 | 4.46535525  | 2.556050739 | 1.807079067 | 2.679717545 |
| ENSMUSG000000044757 | -0.562591486 | -0.951204649 | 0.15917855  | 0.689913934 | 0.999071534 | Gm6430        | Gm6430        |         | 0           | 1.067220799 | 0.06732022  | 1.179495811 | 0           | 0.9459081   | 0           | 0.138164905 | 0.471411931 | 0           |
| ENSMUSG000000034613 | -0.113471262 | 3.867551417  | 0.159160827 | 0.6899303   | 0.999071534 | Ppm1h         | Ppm1h         | PPM1H   | 15.57996745 | 14.46677084 | 15.07972936 | 17.13738032 | 15.63121222 | 24.30256195 | 13.46078104 | 9.602460883 | 9.978219197 | 11.89533154 |
| ENSMUSG000000031527 | 0.097924378  | 5.600017186  | 0.159151591 | 0.689938831 | 0.999071534 | Erl1          | Erl1          | ERI1    | 58.24942784 | 51.87878886 | 33.32350907 | 45.79219032 | 53.95711332 | 76.18198311 | 67.82162757 | 35.64654544 | 33.62738438 | 34.70561015 |
| ENSMUSG000000055809 | 0.192429631  | 1.379271648  | 0.159141933 | 0.68994775  | 0.999071534 | Dnaaf3        | Dnaaf3        | DNAAF3  | 2.315941107 | 1.541541155 | 2.288887492 | 2.914048475 | 2.87771271  | 2.037340523 | 2.523896446 | 1.865226215 | 2.671334273 | 3.398666154 |
| ENSMUSG000000059142 | 0.119357145  | 3.854151826  | 0.159045832 | 0.690036519 | 0.999071534 | Zfp945        | Zfp945        |         | 14.38690688 | 13.57742017 | 11.2424768  | 15.81912029 | 16.21983528 | 12.80614043 | 15.66110102 | 19.34308667 | 7.621159544 | 16.92797181 |
| ENSMUSG000000057666 | 0.173643663  | 10.44196984  | 0.159029864 | 0.690051272 | 0.999071534 | Gapdh         | Gapdh         | GAPDH   | 618.3562755 | 1294.360959 | 1906.57596  | 1371.823011 | 1575.351501 | 583.4797732 | 471.3861977 | 2427.0738   | 1539.552797 | 1778.352065 |
| ENSMUSG000000005057 | -0.163198194 | 3.190597677  | 0.158993541 | 0.690084834 | 0.999071534 | Sh2b2         | Sh2b2         | SH2B2   | 10.0357448  | 13.57742017 | 8.684308424 | 5.203657991 | 12.23027902 | 5.74821076  | 5.047792891 | 16.09621141 | 5.421237202 | 8.104511599 |
| ENSMUSG000000049922 | -0.162982268 | 3.054922423  | 0.158908001 | 0.69016389  | 0.999071534 | Slc35c1       | Slc35c1       | SLC35C1 | 11.64988557 | 6.99622524  | 6.933982695 | 8.04832436  | 11.38004572 | 16.15319986 | 9.836724609 | 4.214029596 | 2.592765618 | 6.862691273 |
| ENSMUSG000000024773 | -0.106607286 | 4.779620508  | 0.158905182 | 0.690166495 | 0.999071534 | Atg2a         | Atg2a         | ATG2A   | 26.87895285 | 31.00869322 | 32.24638554 | 22.13289199 | 35.38278582 | 26.77647544 | 14.23736457 | 35.57746298 | 21.37067419 | 28.43114956 |
| ENSMUSG000000028973 | 0.115610641  | 3.999988022  | 0.158863325 | 0.690205189 | 0.999071534 | Abcb8         | Abcb8         | ABCB8   | 15.01852718 | 12.51019937 | 12.45424076 | 23.3123878  | 15.17339429 | 17.46291877 | 14.36679515 | 16.99428329 | 11.62816095 | 19.54233039 |
| ENSMUSG000000042564 | 0.223224256  | 1.529297172  | 0.158846958 | 0.69022032  | 0.999071534 | Fam227a       | Fam227a       | FAM227A | 3.228281543 | 0.830060622 | 1.88496617  | 3.469105327 | 3.793348573 | 1.236956746 | 1.812028217 | 2.970545453 | 4.085570065 | 3.529384083 |
| ENSMUSG000000063077 | 0.087741015  | 6.052400581  | 0.158823434 | 0.690242071 | 0.999071534 | Kif1b         | Kif1b         | KIF1B   | 56.494927   | 70.85160307 | 71.76335488 | 67.02311493 | 66.77601539 | 78.14656147 | 47.88931717 | 59.13457925 | 64.50486584 | 78.56147533 |
| ENSMUSG000000029500 | 0.090369069  | 5.719898531  | 0.158529198 | 0.690514274 | 0.999071534 | Pgam5         | Pgam5         | PGAM5   | 59.16176828 | 43.22244237 | 65.36793395 | 46.55539349 | 50.29456987 | 66.21356699 | 73.96958045 | 38.68617334 | 41.79852451 | 43.79050622 |
| ENSMUSG000000020917 | 0.103862014  | 7.46690379   | 0.158397428 | 0.690636272 | 0.999071534 | Acly          | Acly          | ACLY    | 187.5210496 | 161.2689208 | 163.3861748 | 179.8384202 | 192.6105439 | 299.3435325 | 165.153429  | 105.9033995 | 150.3018372 | 184.7044337 |
| ENSMUSG000000039308 | 0.107882196  | 4.171058669  | 0.158389761 | 0.690643372 | 0.999071534 | Ndst2         | Ndst2         | NDST2   | 20.70310989 | 20.39577528 | 13.39672385 | 12.07248654 | 23.41411705 | 22.70179439 | 14.04321869 | 20.10299365 | 13.51380868 | 19.99984314 |
| ENSMUSG000000016308 | 0.093992347  | 6.667809866  | 0.158370279 | 0.690661415 | 0.999071534 | Ube2a         | Ube2a         | UBE2A   | 103.3751894 | 80.04155995 | 114.3770544 | 108.5829967 | 102.5512166 | 84.69515601 | 135.4491093 | 90.8434249  | 84.46130423 | 106.3390352 |

|                     |              |              |             |             |             |               |               |           |             |             |             |             |             |             |             |             |             |             |
|---------------------|--------------|--------------|-------------|-------------|-------------|---------------|---------------|-----------|-------------|-------------|-------------|-------------|-------------|-------------|-------------|-------------|-------------|-------------|
| ENSMUSG00000000093  | 0.389450196  | -0.291949845 | 0.158217732 | 0.690802736 | 0.999071534 | Tbx2          | Tbx2          | TBX2      | 1.684320805 | 0.415030311 | 0           | 0           | 1.046440986 | 0.654859454 | 0.711868228 | 0.552659619 | 0.628549241 | 1.176461361 |
| ENSMUSG000000020085 | -0.098073253 | 5.225533373  | 0.158212392 | 0.690807684 | 0.999071534 | Aifm2         | Aifm2         | AlfM2     | 48.35404311 | 43.63747268 | 26.05292527 | 32.12391533 | 51.01399804 | 34.63478888 | 30.93391028 | 47.7359746  | 26.87048004 | 33.07163604 |
| ENSMUSG000000071252 | -0.189534216 | 1.341516778  | 0.158199192 | 0.690819918 | 0.999071534 | 2210408I21Rik | 2210408I21Rik | KIAA0825  | 2.035220973 | 2.786632087 | 2.490848153 | 2.497755836 | 3.466335765 | 2.037340523 | 3.365195261 | 2.348803381 | 1.335667137 | 1.764692042 |
| ENSMUSG000000097415 | 0.103375054  | 5.642045087  | 0.158158765 | 0.690857385 | 0.999071534 | AU020206      | AU020206      |           | 49.47692365 | 36.70053749 | 65.97381593 | 44.68207662 | 52.51825696 | 73.34425881 | 27.89229149 | 38.34076108 | 43.44846627 | 69.21514341 |
| ENSMUSG000000072623 | -0.108940585 | 3.992089088  | 0.15815263  | 0.690863072 | 0.999071534 | Zfp9          | Zfp9          | ZNF25     | 17.68536845 | 18.5577839  | 15.5509709  | 15.47220976 | 17.85489932 | 16.51701067 | 14.36679515 | 20.72473572 | 10.52819978 | 11.43781879 |
| ENSMUSG000000024270 | -0.089524959 | 6.563200182  | 0.158126224 | 0.690887549 | 0.999071534 | Slc39a6       | Slc39a6       | SLC39A6   | 99.02402733 | 123.6790326 | 88.52608975 | 98.38382709 | 95.8801553  | 120.5669016 | 117.1993965 | 79.85931497 | 62.4620808  | 69.34586134 |
| ENSMUSG000000014959 | -0.087805879 | 6.89406607   | 0.158085584 | 0.690925223 | 0.999071534 | Gorasp2       | Gorasp2       | GORASP2   | 123.0255988 | 115.3191364 | 149.6528498 | 117.3251422 | 130.2819027 | 157.3845554 | 123.5414953 | 98.85698938 | 88.07546236 | 96.46983161 |
| ENSMUSG000000019689 | 0.133127396  | 4.203644434  | 0.1579353   | 0.691064594 | 0.999071534 | 1110001J03Rik | 1110001J03Rik | C7orf55   | 22.45761073 | 8.063446039 | 20.80194809 | 26.29581838 | 12.16487646 | 16.88082147 | 24.00937388 | 14.43823255 | 18.46363395 | 17.38548456 |
| ENSMUSG000000022748 | 0.219274321  | 2.37756763   | 0.157912227 | 0.691085998 | 0.999071534 | Cmss1         | Cmss1         | CMSS1     | 8.351423991 | 6.284744707 | 3.164050356 | 2.081463196 | 4.643581873 | 11.05984855 | 9.707294022 | 3.385040167 | 0.707117896 | 3.33330719  |
| ENSMUSG000000031858 | 0.098503248  | 5.833585709  | 0.157878792 | 0.691117018 | 0.999071534 | Mau2          | Mau2          | MAU2      | 52.84556526 | 56.79986254 | 52.30781121 | 66.12114754 | 56.24620297 | 49.33274551 | 34.29910554 | 72.1220803  | 57.11941226 | 65.5550414  |
| ENSMUSG000000042406 | 0.104735824  | 8.072080421  | 0.157872394 | 0.691122954 | 0.999071534 | Atf4          | Atf4          | ATF4      | 224.2953872 | 351.5899633 | 275.272381  | 237.4255686 | 258.2093132 | 255.9772842 | 263.1970986 | 331.9411838 | 226.0420207 | 258.2332688 |
| ENSMUSG000000083411 | 0.286954385  | 7.037838885  | 0.157861621 | 0.69113295  | 0.999071534 | RpB0-ps10     | RpB0-ps10     |           | 11.86042567 | 92.19601905 | 16.76273487 | 382.9892282 | 87.44322485 | 14.5524323  | 136.2904081 | 151.9813953 | 80.92571475 | 295.2918016 |
| ENSMUSG000000034377 | -0.091732435 | 6.825624142  | 0.157820167 | 0.691171417 | 0.999071534 | Tulp4         | Tulp4         | TULP4     | 94.46232515 | 145.3198988 | 129.2548231 | 105.2526556 | 133.2904205 | 152.5094906 | 78.95265804 | 108.7357801 | 86.89693254 | 109.2148297 |
| ENSMUSG000000042111 | 0.098736526  | 4.757061794  | 0.157816828 | 0.691174516 | 0.999071534 | Ccdc115       | Ccdc115       | CCDC115   | 29.40543405 | 23.47885759 | 27.53397012 | 29.48739528 | 24.72216828 | 33.97992943 | 37.27600904 | 16.64887103 | 22.23492939 | 25.48999616 |
| ENSMUSG000000026031 | 0.094548203  | 6.092954179  | 0.15758906  | 0.691385981 | 0.999071534 | Cflar         | Cflar         | CFLAR     | 60.14428875 | 87.68997568 | 67.1855799  | 55.22815681 | 72.66224593 | 69.19681561 | 45.23599014 | 73.29648199 | 73.61882983 | 72.67916853 |
| ENSMUSG000000024354 | 0.343336317  | -0.029215789 | 0.157579804 | 0.691394578 | 0.999071534 | Slc23a1       | Slc23a1       | SLC23A1   | 0.98252047  | 0           | 1.481044848 | 0.485674746 | 0.981038424 | 0.509335131 | 0.258861174 | 1.243484143 | 1.178529826 | 1.241820326 |
| ENSMUSG000000031221 | -0.092696044 | 6.808540283  | 0.157475337 | 0.69149163  | 0.999071534 | Igfbp1        | Igfbp1        | IGFBP1    | 113.9723745 | 109.5680021 | 122.6574415 | 131.2015635 | 121.0601415 | 83.60372359 | 108.3334013 | 108.3903678 | 89.4869816  | 126.7310322 |
| ENSMUSG000000030638 | -0.118482897 | 4.119031515  | 0.157472092 | 0.691494645 | 0.999071534 | Sh3gB3        | Sh3gB3        | SH3GL3    | 13.40438641 | 14.22961066 | 16.62809442 | 26.92025734 | 21.25583252 | 17.0263458  | 11.77818341 | 14.3691501  | 17.36367278 | 18.2351511  |
| ENSMUSG000000050035 | -0.346516723 | 0.078716869  | 0.15744915  | 0.691515963 | 0.999071534 | Fh4           | Fh4           |           | 0.280720134 | 1.067220799 | 1.346404407 | 1.457024238 | 1.111843547 | 1.236956746 | 1.48845175  | 0.069082452 | 0           | 1.30717929  |
| ENSMUSG000000000085 | -0.099417081 | 4.556288771  | 0.157442939 | 0.691521736 | 0.999071534 | Scmh1         | Scmh1         | SCMH1     | 19.36968926 | 28.63709145 | 23.4947569  | 23.38176991 | 30.87000907 | 25.61228086 | 17.34369865 | 25.14601267 | 15.00661312 | 26.86253441 |
| ENSMUSG000000010051 | 0.179704435  | 3.597852355  | 0.157384487 | 0.691576062 | 0.999071534 | Hyal1         | Hyal1         | HYAL1     | 9.12340436  | 18.20204363 | 9.963392611 | 8.672763319 | 12.55729183 | 3.565345915 | 5.953807    | 24.59335305 | 12.49241616 | 11.9606905  |
| ENSMUSG000000027474 | 0.246357953  | 0.749217934  | 0.157341158 | 0.691616339 | 0.999071534 | Ccm2l         | Ccm2l         | CCM2L     | 2.526481208 | 1.719411288 | 1.413724627 | 0.763203172 | 0.981038424 | 3.274297269 | 1.29430587  | 0.345412262 | 1.728510412 | 1.699333077 |
| ENSMUSG000000040187 | 0.227743904  | 1.071545804  | 0.157203747 | 0.691744116 | 0.999071534 | Arntl2        | Arntl2        | ARNTL2    | 1.403600671 | 2.01586151  | 3.567971678 | 0.416292639 | 2.092881971 | 1.600767553 | 1.68259763  | 1.934308667 | 2.435628308 | 2.352922722 |
| ENSMUSG000000031605 | -0.082626516 | 5.280397166  | 0.157159792 | 0.691785004 | 0.999071534 | Klh2          | Klh2          | KLHL2     | 37.75685805 | 41.62161117 | 36.35291898 | 45.44527979 | 45.32397519 | 48.6051239  | 41.48250312 | 32.88324734 | 27.34189197 | 33.79058465 |
| ENSMUSG000000038668 | -0.089880645 | 5.513307521  | 0.157107142 | 0.691833987 | 0.999071534 | Lpar1         | Lpar1         | LPAR1     | 36.14271727 | 47.60990566 | 49.07644063 | 52.31410834 | 58.14287726 | 36.96317805 | 45.81842778 | 46.56157291 | 39.91828769 | 40.71863489 |
| ENSMUSG000000024817 | -0.093798816 | 6.004026037  | 0.15692715  | 0.692001518 | 0.999071534 | Uhrf2         | Uhrf2         | UHRF2     | 77.89983723 | 95.93129185 | 56.27970421 | 49.26129565 | 65.66417184 | 81.20257226 | 81.4118392  | 51.46642703 | 38.34150369 | 52.94076125 |
| ENSMUSG000000030335 | -0.096817508 | 6.347876524  | 0.15651358  | 0.692386876 | 0.999071534 | Mrpl51        | Mrpl51        | MRPL51    | 94.53250518 | 52.76813952 | 102.5960158 | 110.3869315 | 73.38167411 | 78.87418309 | 73.25771222 | 71.22400842 | 72.20459403 | 80.84903909 |
| ENSMUSG000000028541 | 0.328913958  | -0.131432409 | 0.156420362 | 0.692473817 | 0.999071534 | B4galt2       | B4galt2       | B4GALT2   | 0.701800335 | 1.422961066 | 0.471241542 | 0.763203172 | 0.196207685 | 1.600767553 | 1.68259763  | 0.207247357 | 0.707117896 | 0.130717929 |
| ENSMUSG000000023800 | -0.097597493 | 4.406750774  | 0.156418488 | 0.692475565 | 0.999071534 | Tiam2         | Tiam2         | TIAM2     | 18.45734882 | 25.25755892 | 22.88887492 | 24.56126572 | 21.64824789 | 24.81189708 | 14.56094103 | 20.79381817 | 15.32088774 | 23.59458619 |
| ENSMUSG000000072612 | -0.239802638 | 1.486385029  | 0.156398455 | 0.692494254 | 0.999071534 | Gm10382       | Gm10382       |           | 5.052962415 | 2.786632087 | 2.558168373 | 2.01208109  | 2.681505025 | 0.582097292 | 1.035444696 | 5.18118393  | 1.021392516 | 3.725460977 |
| ENSMUSG000000028020 | -0.474764297 | -0.576975209 | 0.156387316 | 0.692504645 | 0.999071534 | GlrB          | GlrB          | GLRB      | 0.210540101 | 0           | 1.95228639  | 1.040731598 | 0.065402562 | 0.145524323 | 0.323576467 | 0.345412262 | 1.178529826 | 0           |
| ENSMUSG000000047246 | 0.250269169  | 1.320663153  | 0.156335088 | 0.692553375 | 0.999071534 | Hist1h2be     | Hist1h2be     | HIST1H2BE | 2.807201342 | 3.675982753 | 1.211763966 | 0.901967385 | 2.746907587 | 0.582097292 | 1.035444696 | 5.526596192 | 2.042785033 | 2.745076509 |
| ENSMUSG000000076437 | 0.138235126  | 4.722342394  | 0.156261208 | 0.692622323 | 0.999071534 | 2700094K13Rik | 2700094K13Rik | C11orf31  | 42.59928036 | 14.58535092 | 25.71632417 | 22.68794884 | 24.65676572 | 35.87174563 | 50.28378303 | 11.39860464 | 15.24231909 | 23.72530412 |
| ENSMUSG000000052911 | 0.125066637  | 5.914079451  | 0.156179442 | 0.692698652 | 0.999071534 | Lamb2         | Lamb2         | LAMB2     | 43.65198086 | 70.08083249 | 57.82806927 | 58.90540846 | 68.21487174 | 47.58645364 | 25.10953387 | 109.8410993 | 47.45546768 | 68.23475894 |
| ENSMUSG000000030842 | -0.126060725 | 5.973620794  | 0.15608558  | 0.692786302 | 0.999071534 | Lamtor1       | Lamtor1       | LAMTOR1   | 91.37440367 | 75.53551657 | 42.47905904 | 55.43630313 | 76.71720475 | 77.41893986 | 112.4751801 | 49.87753063 | 23.64916518 | 35.55527669 |
| ENSMUSG000000036469 | -0.156326187 | 3.061084297  | 0.155819116 | 0.693035295 | 0.999071534 | 1-Mar         | 1-Mar         | 1-Mar     | 14.10618674 | 11.56155866 | 5.587578288 | 5.064893778 | 9.0255535   | 11.49642152 | 10.22501637 | 8.151729382 | 4.556981996 | 4.052255799 |
| ENSMUSG000000041180 | -0.121703297 | 3.890054611  | 0.155791249 | 0.693061349 | 0.999071534 | Hectd2        | Hectd2        | HECTD2    | 15.08870721 | 20.27719519 | 19.32090324 | 11.23990126 | 13.7999405  | 16.4442485  | 13.07248928 | 19.13583931 | 6.049786443 | 14.57504908 |
| ENSMUSG000000052151 | 0.083421239  | 6.290311089  | 0.155779561 | 0.693072278 | 0.999071534 | Ppap2c        | Pppp2         | PLPP2     | 79.44379797 | 63.97395792 | 95.25811178 | 81.03830045 | 73.38167411 | 83.89477224 | 85.10061093 | 71.70758558 | 66.78355683 | 80.06473152 |
| ENSMUSG000000054027 | -0.098025561 | 5.144498821  | 0.155705918 | 0.693141146 | 0.999071534 | Nt5dc3        | Nt5dc3        | NT5DC3    | 37.47613791 | 53.71678023 | 28.61109365 | 28.79357422 | 41.39982149 | 44.96701582 | 29.63960441 | 44.28185198 | 22.15636074 | 25.81679098 |

|                     |              |             |             |             |             |          |          |           |             |             |             |             |             |             |             |             |             |             |
|---------------------|--------------|-------------|-------------|-------------|-------------|----------|----------|-----------|-------------|-------------|-------------|-------------|-------------|-------------|-------------|-------------|-------------|-------------|
| ENSMUSG00000006611  | -0.126967278 | 4.050642438 | 0.155362225 | 0.693462804 | 0.999071534 | Hfe      | Hfe      | HFE       | 17.47482835 | 16.54192239 | 11.98299922 | 23.72868044 | 18.96674286 | 21.46483765 | 25.69197151 | 10.77686257 | 7.306884924 | 13.00643394 |
| ENSMUSG00000047963  | -0.100688551 | 6.081542273 | 0.155242605 | 0.693574851 | 0.999071534 | Stbd1    | Stbd1    | STBD1     | 78.32091743 | 113.2439848 | 50.75944614 | 55.43630313 | 66.97222307 | 71.08863181 | 87.94808384 | 64.03943337 | 36.84869924 | 59.41129873 |
| ENSMUSG00000022216  | -0.11223594  | 8.064376378 | 0.155144301 | 0.693666969 | 0.999071534 | Psme1    | Psme1    | PSME1     | 296.5808217 | 211.1911382 | 337.4762646 | 321.5166817 | 271.4206306 | 202.3515712 | 185.4740311 | 283.5834671 | 236.5702205 | 310.7818762 |
| ENSMUSG00000020794  | 0.088350782  | 6.314512798 | 0.155112956 | 0.693696348 | 0.999071534 | Ube2g1   | Ube2g1   | UBE2G1    | 68.28517264 | 91.66240865 | 78.83197802 | 75.48773193 | 85.74275825 | 82.439529   | 96.87879434 | 98.71882447 | 48.71256616 | 71.50270717 |
| ENSMUSG00000098041  | 0.342259676  | 0.319299669 | 0.155059754 | 0.693746223 | 0.999071534 | Gm26981  | Gm26981  |           | 0.350900168 | 0.177870133 | 1.817645949 | 1.595788451 | 1.177246109 | 0.509335131 | 0.129430587 | 0.345412262 | 2.514196963 | 2.156845829 |
| ENSMUSG00000041779  | -0.111691397 | 4.855231146 | 0.155057743 | 0.693748108 | 0.999071534 | Tram2    | Tram2    | TRAM2     | 26.24733254 | 33.9139054  | 29.21697563 | 26.64272891 | 39.76475745 | 33.76164295 | 25.23896446 | 42.76203803 | 10.44963113 | 24.64032962 |
| ENSMUSG00000040877  | -0.205346992 | 1.832415106 | 0.155016667 | 0.693786622 | 0.999071534 | Wdr25    | Wdr25    | WDR25     | 5.333682549 | 3.557402664 | 3.298690797 | 3.191576901 | 3.727946011 | 8.003837767 | 3.106334087 | 0.690824524 | 2.357059653 | 2.156845829 |
| ENSMUSG00000027489  | -0.301633818 | 0.120447194 | 0.154925801 | 0.693871841 | 0.999071534 | Necab3   | Necab3   | NECAB3    | 0.98252047  | 0.237160178 | 0.673202203 | 2.497755836 | 0.981038424 | 0.9459081   | 0.323576467 | 1.036236786 | 0.31427462  | 1.568615148 |
| ENSMUSG00000050812  | -0.078679468 | 6.388937698 | 0.154904939 | 0.693891409 | 0.999071534 | Al314180 | Al314180 | KIAA0368  | 84.49676038 | 94.86407105 | 86.77567402 | 89.43353534 | 90.38634013 | 101.8670261 | 80.11753333 | 73.50372935 | 58.76935401 | 83.39803871 |
| ENSMUSG00000074071  | -0.234176915 | 0.467127336 | 0.154895328 | 0.693900426 | 0.999071534 | Fam169b  | Fam169b  | FAM169B   | 2.035220973 | 0.830060622 | 1.279084186 | 1.734552664 | 1.111843547 | 1.382481069 | 0.906014109 | 0.690824524 | 0.785686551 | 1.830051006 |
| ENSMUSG00000042485  | -0.16824431  | 4.259116934 | 0.154857133 | 0.69393626  | 0.999071534 | Mustn1   | Mustn1   | MUSTN1    | 14.45708691 | 19.20997439 | 20.12874588 | 19.91266458 | 30.87000907 | 5.093351307 | 8.024669391 | 35.02480336 | 13.59237733 | 21.63381725 |
| ENSMUSG00000006304  | -0.097093378 | 8.489990917 | 0.154723145 | 0.694062005 | 0.999071534 | Arpc2    | Arpc2    | ARPC2     | 349.5667471 | 366.5903446 | 416.9814448 | 385.6951303 | 407.9811792 | 446.7596717 | 282.2233949 | 333.9445749 | 287.7969836 | 337.9712055 |
| ENSMUSG00000029510  | -0.342568443 | 0.140141462 | 0.154690607 | 0.69409255  | 0.999071534 | Gpc2     | Gpc2     | GPC2      | 2.456301174 | 1.719411288 | 0.134640441 | 0.416292639 | 0.915635862 | 1.236956746 | 0.582437641 | 0.690824524 | 0           | 1.764692042 |
| ENSMUSG00000029715  | -0.122903864 | 3.987732065 | 0.154564386 | 0.694211079 | 0.999071534 | Pop7     | Pop7     | POP7      | 19.65040939 | 16.12689208 | 17.70521795 | 13.18260024 | 18.83593774 | 19.8640701  | 19.02629628 | 12.43484143 | 4.949825271 | 18.95409971 |
| ENSMUSG00000073599  | 0.088034846  | 5.383118826 | 0.154495088 | 0.694276177 | 0.999071534 | Ecsr     | Ecsr     | ECSCR     | 46.4591822  | 36.75982753 | 52.71173253 | 32.47082586 | 41.53062661 | 43.73005907 | 56.10815945 | 36.33736996 | 29.69895163 | 42.22189107 |
| ENSMUSG000000067924 | -0.133750679 | 3.280155586 | 0.154420679 | 0.694346095 | 0.999071534 | Cxx1b    | Cxx1b    | FAM127A   | 10.73754513 | 8.359896261 | 15.41633046 | 7.63203172  | 10.00659192 | 14.40690798 | 8.477703446 | 5.526596192 | 7.85686551  | 8.692742279 |
| ENSMUSG00000002083  | -0.161526148 | 2.104869521 | 0.154261294 | 0.694495927 | 0.999071534 | Bbc3     | Bbc3     |           | 3.719541778 | 4.921073686 | 4.241173882 | 4.162926393 | 5.820827982 | 3.492583753 | 2.588611739 | 4.973936572 | 3.299883514 | 4.444409586 |
| ENSMUSG000000003923 | 0.093191068  | 5.788605268 | 0.154192812 | 0.694560331 | 0.999071534 | Tfam     | Tfam     | TFAM      | 65.61833136 | 58.51927383 | 50.9614068  | 48.56747458 | 54.02251588 | 64.17622646 | 87.49507678 | 42.27846087 | 30.40606952 | 55.68583776 |
| ENSMUSG00000074212  | 0.090265727  | 5.443132906 | 0.154140892 | 0.69460917  | 0.999071534 | Dnajb14  | Dnajb14  | DNAJB14   | 39.16045872 | 37.76775829 | 50.89408658 | 49.53882408 | 39.83016001 | 49.98760497 | 39.21746785 | 34.81755601 | 49.3411154  | 39.99968628 |
| ENSMUSG00000027239  | 0.277233852  | 0.123026633 | 0.154001444 | 0.694740393 | 0.999071534 | Mdk      | Mdk      | MDK       | 0.631620302 | 0.592900444 | 1.009803305 | 0.346910533 | 1.962076848 | 0.654859454 | 1.617882337 | 0.898071881 | 1.178529826 | 0.588230681 |
| ENSMUSG00000034930  | -0.099051967 | 5.187753921 | 0.15384003  | 0.69489237  | 0.999071534 | Rtkn     | Rtkn     | RTKN      | 39.23063875 | 30.65295296 | 47.73003622 | 36.07869541 | 41.26901637 | 33.90716727 | 20.25588686 | 33.64315432 | 36.14158135 | 42.67940382 |
| ENSMUSG00000024767  | -0.081464319 | 6.587692476 | 0.153833735 | 0.694898299 | 0.999071534 | Otub1    | Otub1    | OTUB1     | 96.28700602 | 93.02607967 | 121.0417562 | 93.38831541 | 109.1568753 | 120.275853  | 89.95425794 | 86.83664266 | 70.24037766 | 88.5613969  |
| ENSMUSG00000040354  | 0.085493973  | 6.240258893 | 0.1537591   | 0.694968603 | 0.999071534 | Mars     | Mars     | MARS      | 94.46232515 | 69.48793205 | 74.18688282 | 59.73799374 | 83.84608397 | 101.2849288 | 89.50125088 | 56.02586889 | 64.81914046 | 67.18901551 |
| ENSMUSG00000024858  | -0.085936519 | 6.551233134 | 0.153735121 | 0.694991195 | 0.999071534 | Adrbk1   | Adrbk1   | GRK2      | 124.5695595 | 95.04194118 | 97.27771839 | 86.31134055 | 98.69246545 | 141.2313555 | 73.84014986 | 81.31004647 | 63.40490466 | 89.73785827 |
| ENSMUSG00000034593  | 0.084944092  | 6.727815946 | 0.153703642 | 0.695020856 | 0.999071534 | Myo5a    | Myo5a    | MYO5A     | 92.00602397 | 122.848972  | 103.4038584 | 102.6161356 | 112.4924059 | 130.9718907 | 99.59683666 | 119.1672304 | 90.35395336 | 87.6463714  |
| ENSMUSG00000035095  | -0.13638388  | 3.409473819 | 0.15368018  | 0.695042966 | 0.999071534 | Fam167a  | Fam167a  | FAM167A   | 11.79024564 | 13.34025999 | 11.915679   | 11.23990126 | 8.698540692 | 19.57302145 | 9.383717555 | 9.671543335 | 3.928432755 | 8.300588492 |
| ENSMUSG00000026820  | 0.171469154  | 3.783442713 | 0.153675578 | 0.695047302 | 0.999071534 | Ptges2   | Ptges2   | PTGES2    | 22.66815083 | 14.64464097 | 7.203263577 | 9.366584384 | 13.21131744 | 21.61036197 | 30.93391028 | 5.457513739 | 5.735511822 | 9.019537102 |
| ENSMUSG00000031540  | -0.09451658  | 5.382687651 | 0.153605149 | 0.695113684 | 0.999071534 | Kat6a    | Kat6a    | KAT6A     | 35.65145704 | 48.79570655 | 47.52807556 | 44.26578398 | 46.50122129 | 67.74157238 | 24.46238094 | 43.31469765 | 28.5204218  | 35.48991773 |
| ENSMUSG000000063739 | -0.470785193 | 0.681304724 | 0.153593671 | 0.695124504 | 0.999071534 | Gm4963   | Gm4963   |           | 5.474042616 | 3.260952442 | 0.201960661 | 0           | 0           | 4.511254014 | 1.164875283 | 0.828989429 | 0           | 0.196076894 |
| ENSMUSG000000004945 | 0.098440183  | 5.913858709 | 0.153507719 | 0.695205543 | 0.999071534 | Tmem242  | Tmem242  | TMEM242   | 83.44405988 | 62.66957694 | 52.98101341 | 46.69415771 | 57.2272414  | 56.39067518 | 101.4088649 | 49.94661308 | 41.56281855 | 52.02573575 |
| ENSMUSG000000021094 | -0.08579144  | 5.066771949 | 0.153466204 | 0.695244695 | 0.999071534 | Dhrs7    | Dhrs7    | DHRS7     | 37.96739815 | 37.94562842 | 32.58298665 | 35.52363855 | 34.4017474  | 30.34182135 | 39.28218314 | 35.37021563 | 23.41345922 | 27.77755991 |
| ENSMUSG000000041134 | 0.209974087  | 1.896903487 | 0.153190641 | 0.695504725 | 0.999071534 | Cyyr1    | Cyyr1    | CYYR1     | 4.280982046 | 3.675982753 | 3.971893    | 2.150845303 | 3.27012808  | 11.3508972  | 4.141778783 | 1.588896405 | 1.649941757 | 1.568615148 |
| ENSMUSG000000037098 | -0.126227002 | 3.771530901 | 0.153176039 | 0.695518512 | 0.999071534 | Rab11fp3 | Rab11fp3 | RAB11FIP3 | 21.82599043 | 18.0241735  | 9.82875217  | 10.75422652 | 13.27672    | 22.19245926 | 9.189571674 | 13.33291331 | 7.228316269 | 12.74499808 |
| ENSMUSG000000025019 | -0.286451515 | 0.753054471 | 0.153173241 | 0.695521154 | 0.999071534 | Lcor     | Lcor     |           | 1.965040939 | 3.557402664 | 2.356207712 | 0           | 1.046440986 | 1.964578361 | 1.48845175  | 1.381649048 | 1.178529826 | 0.784307574 |
| ENSMUSG00000015937  | 0.113813501  | 7.353712217 | 0.153164516 | 0.695529392 | 0.999071534 | H2afy    | H2afy    | H2AFY     | 140.2898871 | 107.2556903 | 266.1286201 | 177.5488107 | 160.5632887 | 182.1236903 | 101.8618719 | 142.171687  | 187.4648111 | 194.1161246 |
| ENSMUSG00000028364  | 0.118195247  | 7.47424542  | 0.153082909 | 0.695606458 | 0.999071534 | Tnc      | Tnc      | TNC       | 109.4106723 | 182.7319169 | 265.3089884 | 166.8639663 | 157.9471863 | 322.7001864 | 204.8239039 | 164.6925665 | 124.2170437 | 107.0579839 |
| ENSMUSG00000042515  | 0.156544281  | 2.524427141 | 0.152824142 | 0.695850985 | 0.999071534 | Mum1l1   | Mum1l1   | MUM1L1    | 5.965302851 | 5.51397413  | 4.308494102 | 5.550568524 | 6.278645913 | 10.62327558 | 6.147952881 | 3.246875263 | 2.671334273 | 7.25484506  |
| ENSMUSG00000089872  | -0.106621126 | 4.216752522 | 0.15272131  | 0.695948224 | 0.999071534 | Rps6kc1  | Rps6kc1  | RPS6KC1   | 22.94887097 | 27.15484034 | 16.35881354 | 11.37866547 | 22.3022735  | 24.59361059 | 17.60255983 | 16.71795348 | 12.80669078 | 15.55543355 |
| ENSMUSG00000027534  | 0.112856671  | 4.206763448 | 0.152640366 | 0.696024792 | 0.999071534 | Snx16    | Snx16    | SNX16     | 14.03600671 | 23.06382727 | 16.29149332 | 16.44355925 | 21.71365045 | 13.38823772 | 20.25588686 | 24.80060041 | 16.81369219 | 14.90184391 |

|                      |              |              |             |             |             |               |               |         |             |             |             |             |             |             |              |             |             |             |
|----------------------|--------------|--------------|-------------|-------------|-------------|---------------|---------------|---------|-------------|-------------|-------------|-------------|-------------|-------------|--------------|-------------|-------------|-------------|
| ENSMUSG00000044303   | -0.122644018 | 8.11671127   | 0.15259048  | 0.696071994 | 0.999071534 | Cdkn2a        | Cdkn2a        |         | 237.4190535 | 181.0717956 | 333.4370514 | 435.8583933 | 299.8053424 | 220.6148737 | 206.4417862  | 219.889446  | 286.2256105 | 320.1282081 |
| ENSMUSG00000014543   | 0.253855938  | 0.627140272  | 0.152505869 | 0.696152071 | 0.999071534 | Klra17        | Klra17        |         | 1.263240604 | 0.770770577 | 0.807842644 | 2.358991623 | 1.438856355 | 1.819054038 | 2.265035272  | 1.312566595 | 1.728510412 | 0.261435858 |
| ENSMUSG000000032456  | 0.156560599  | 2.617015318  | 0.152456042 | 0.69619924  | 0.999071534 | Nmnat3        | Nmnat3        | NMNAT3  | 4.280982046 | 4.624623464 | 6.260780492 | 8.256470679 | 5.820827982 | 3.929156722 | 6.989251696  | 8.704389002 | 4.792687961 | 5.620870947 |
| ENSMUSG000000008690  | -0.121990537 | 7.293281797  | 0.152433924 | 0.69622018  | 0.999071534 | Ncaph2        | Ncaph2        | NCAPH2  | 251.03398   | 192.3369041 | 130.8031881 | 122.1125075 | 156.7699401 | 234.0758736 | 236.7285435  | 103.2091839 | 67.25476876 | 113.1363676 |
| ENSMUSG000000003031  | 0.097315492  | 6.388760511  | 0.152243921 | 0.696400144 | 0.999071534 | Cdkn1b        | Cdkn1b        | CDKN1B  | 71.93453438 | 99.37011443 | 72.97511885 | 72.29615502 | 104.1862806 | 68.10538318 | 77.46420629  | 121.101539  | 75.81875217 | 67.64652826 |
| ENSMUSG000000029472  | -0.099643069 | 7.435827381  | 0.15220408  | 0.696437896 | 0.999071534 | Anapc5        | Anapc5        | ANAPC5  | 232.225731  | 203.8984627 | 148.777687  | 159.9951377 | 187.2475338 | 261.3616842 | 187.2860593  | 124.0720845 | 104.4963113 | 153.9857204 |
| ENSMUSG000000042807  | -0.262030691 | 1.06122021   | 0.152170523 | 0.696469699 | 0.999071534 | Hecw2         | Hecw2         | HECW2   | 2.526481208 | 3.320242487 | 1.95228639  | 2.081463196 | 1.111843547 | 2.473913492 | 3.041618794  | 1.036236786 | 0           | 2.418281687 |
| ENSMUSG00000079988   | -0.202872746 | 1.886057302  | 0.152069767 | 0.69656521  | 0.999071534 | Gm11970       | Gm11970       |         | 7.088183388 | 2.312311732 | 3.433331237 | 5.550568524 | 1.308051232 | 2.110102684 | 2.847472913  | 2.832380548 | 3.8498641   | 3.856178906 |
| ENSMUSG000000024304  | 0.102543436  | 6.524814818  | 0.152043819 | 0.696589813 | 0.999071534 | Cdh2          | Cdh2          | CDH2    | 64.56563086 | 71.85953382 | 110.7417625 | 122.7369465 | 86.78919924 | 99.61139912 | 68.79235697  | 88.84003378 | 107.5604888 | 86.66598693 |
| ENSMUSG000000034035  | 0.334219356  | -0.169140623 | 0.151981389 | 0.696649018 | 0.999071534 | Ccdc17        | Ccdc17        | CCDC17  | 0.491260235 | 1.067220799 | 0.336601102 | 0           | 1.63506404  | 0.436572969 | 0.517722348  | 1.243484143 | 0.785686551 | 0.980384468 |
| ENSMUSG000000021518  | 0.084769586  | 5.640686723  | 0.151703423 | 0.696912793 | 0.999071534 | Ptdss1        | Ptdss1        | PTDSS1  | 54.38952599 | 48.02493597 | 46.18167115 | 42.66999553 | 60.30116179 | 68.97852912 | 66.5273217   | 44.6963467  | 30.24893221 | 42.54868589 |
| ENSMUSG000000041995  | -0.120718052 | 4.127550928  | 0.151689375 | 0.696926131 | 0.999071534 | Zbed3         | Zbed3         | ZBED3   | 13.82546661 | 11.50226861 | 25.91828483 | 20.81463196 | 21.38663764 | 20.15511874 | 9.060141087  | 17.06336574 | 14.14235792 | 19.99984314 |
| ENSMUSG000000027086  | 0.14152005   | 3.002482336  | 0.151663678 | 0.696950531 | 0.999071534 | Fastkd1       | Fastkd1       | FASTKD1 | 8.421604025 | 5.51397413  | 7.87646578  | 9.782877023 | 7.128879214 | 8.076599929 | 5.565515239  | 6.770080335 | 9.899650542 | 8.758101244 |
| ENSMUSG000000038387  | -0.126848374 | 6.324915608  | 0.151656585 | 0.696957267 | 0.999071534 | Rras          | Rras          | RRAS    | 55.2316864  | 74.70545595 | 111.0110433 | 93.52707963 | 97.77682959 | 43.29348611 | 40.64120431  | 125.522816  | 61.04784501 | 89.80321723 |
| ENSMUSG000000027822  | 0.089945928  | 5.475941416  | 0.151558431 | 0.697050492 | 0.999071534 | Slc33a1       | Slc33a1       | SLC33A1 | 45.89774194 | 44.82327357 | 32.38102598 | 52.38349044 | 47.15524691 | 46.27673473 | 55.33157592  | 36.19920505 | 44.31272148 | 36.86245598 |
| ENSMUSG000000039483  | 0.088640635  | 4.745967888  | 0.151307296 | 0.697289177 | 0.999071534 | Asb6          | Asb6          | ASB6    | 29.26507399 | 22.53021687 | 25.44704329 | 28.30789947 | 28.71172454 | 36.3083186  | 30.54561852  | 23.97161098 | 22.15636074 | 21.30702243 |
| ENSMUSG000000053925  | 0.461723328  | -0.595521779 | 0.151159591 | 0.697429666 | 0.999071534 | Gm9929        | Gm9929        |         | 0           | 0.5336104   | 0.673202203 | 0.901967385 | 0.196207685 | 0           | 0.388291761  | 0           | 1.099961171 | 1.30717929  |
| ENSMUSG000000032215  | 0.09588275   | 6.272140668  | 0.151100941 | 0.697485472 | 0.999071534 | Rsl24d1       | Rsl24d1       | RS124D1 | 87.86540199 | 72.57101435 | 84.75615741 | 74.30823611 | 67.62624869 | 100.7755937 | 122.1177588  | 50.84468496 | 58.6122167  | 58.16947841 |
| ENSMUSG000000030966  | -0.12534699  | 3.411859557  | 0.151046319 | 0.697537457 | 0.999071534 | Trim21        | Trim21        | TRIM21  | 10.10592483 | 11.32439848 | 9.89607239  | 9.227820171 | 16.61225065 | 16.4442485  | 7.636404631  | 7.875399573 | 7.228316269 | 10.65351121 |
| ENSMUSG000000092365  | -0.130674833 | 4.123744416  | 0.150975191 | 0.697605167 | 0.999071534 | BC023719      | BC023719      |         | 29.82651426 | 12.21374915 | 18.51306059 | 17.83120138 | 15.63121222 | 20.2278809  | 27.56871502  | 7.737234668 | 10.76390575 | 14.90184391 |
| ENSMUSG000000026926  | 0.079458125  | 6.330313786  | 0.150949408 | 0.697629716 | 0.999071534 | Pmpca         | Pmpca         | PMPCA   | 73.89957532 | 84.36973319 | 81.92870816 | 72.71244766 | 93.26405284 | 97.93786941 | 91.63685557  | 78.54674837 | 54.7623526  | 80.58760323 |
| ENSMUSG000000027668  | 0.080748304  | 5.684922455  | 0.150923906 | 0.697654    | 0.999071534 | Mfn1          | Mfn1          | MFN1    | 42.31856023 | 52.17523908 | 50.15356415 | 50.92646621 | 63.37508219 | 64.61279943 | 41.15892665  | 55.40412682 | 40.0700141  | 55.35904294 |
| ENSMUSG000000023452  | 0.086634249  | 6.08472374   | 0.150881711 | 0.697694184 | 0.999071534 | Plsd          | Plsd          |         | 71.23273404 | 83.12464226 | 55.33722112 | 53.77113258 | 79.13709953 | 81.27533442 | 62.777383467 | 79.85931497 | 40.61999469 | 77.05821915 |
| ENSMUSG000000031026  | 0.287994953  | 0.097735049  | 0.150880407 | 0.697695426 | 0.999071534 | Trim66        | Trim66        | TRIM66  | 0.561440268 | 0.889350666 | 0.673202203 | 1.80393477  | 0.39241537  | 1.600767553 | 0.453007054  | 0.27632981  | 1.257098482 | 1.437897219 |
| ENSMUSG000000004730  | -0.175974533 | 5.043548191  | 0.150873012 | 0.697702469 | 0.999071534 | Emr1          | Adgre1        | ADGRE1  | 52.42448506 | 62.55099685 | 19.38822346 | 22.61856673 | 25.24538878 | 72.39835071 | 52.09581125  | 9.049801264 | 11.70672961 | 15.22863873 |
| ENSMUSG000000058546  | -0.100602115 | 9.107981532  | 0.15087157  | 0.697703842 | 0.999071534 | Rpl23a        | Rpl23a        |         | 703.2741161 | 451.9680085 | 646.0048344 | 642.7558351 | 512.6906804 | 561.5056005 | 535.0013312  | 529.9314923 | 365.4228149 | 593.3286798 |
| ENSMUSG000000029254  | -0.223566255 | 0.596553046  | 0.150770677 | 0.697799957 | 0.999071534 | Stap1         | Stap1         | STAP1   | 2.105401006 | 1.660121243 | 1.750325729 | 0.555056852 | 1.700466601 | 1.528005392 | 0.841298815  | 1.519813953 | 1.021392516 | 1.241820326 |
| ENSMUSG000000085803  | -0.322663762 | -0.031953261 | 0.150664005 | 0.697901617 | 0.999071534 | Gm12056       | Gm12056       |         | 0.912340436 | 0.355740266 | 1.144443746 | 2.081463196 | 0.327012808 | 0.582097292 | 1.164875283  | 0.069082452 | 1.178529826 | 0.522871716 |
| ENSMUSG000000024160  | -0.120497438 | 3.773107173  | 0.150541003 | 0.698018891 | 0.999071534 | Spsb3         | Spsb3         | SPSB3   | 19.86094949 | 15.59328168 | 11.64639812 | 10.5460802  | 16.02362759 | 22.99284304 | 14.8845175   | 10.36236786 | 7.306884924 | 9.607767782 |
| ENSMUSG0000000047909 | 0.107114337  | 4.215340802  | 0.15049964  | 0.698058341 | 0.999071534 | Ankrd16       | Ankrd16       | ANKRD16 | 22.1768906  | 17.54985314 | 16.29149332 | 20.88401407 | 15.04258917 | 15.71662689 | 14.30207986  | 19.20492177 | 17.83508471 | 23.79066308 |
| ENSMUSG000000091780  | -0.100438    | 4.48523705   | 0.150402364 | 0.698151141 | 0.999071534 | Sco2          | Sco2          | SCO2    | 23.2295911  | 25.25755892 | 29.01501497 | 17.20676242 | 25.31079134 | 19.2819728  | 19.67344922  | 26.38949681 | 12.80669078 | 25.81679098 |
| ENSMUSG000000048755  | 0.124273977  | 4.495680478  | 0.150360157 | 0.698191416 | 0.999071534 | Mcat          | Mcat          | MCAT    | 35.37073691 | 23.83459785 | 18.71502126 | 14.70900659 | 19.55536592 | 38.85499425 | 35.59341141  | 12.36575898 | 13.27810271 | 17.25476663 |
| ENSMUSG000000059070  | -0.103718913 | 9.783435572  | 0.150211029 | 0.698333773 | 0.999071534 | Rpl18         | Rpl18         | RPL18   | 1184.779326 | 836.0489162 | 911.7850643 | 966.5621263 | 836.7603731 | 826.2143441 | 1143.972243  | 645.9900123 | 672.7048249 | 809.3400575 |
| ENSMUSG0000000017969 | 0.582791338  | -0.860962476 | 0.150160651 | 0.698381882 | 0.999071534 | Ptgis         | Ptgis         | PTGIS   | 1.263240604 | 0           | 0.336601102 | 0           | 0.130805123 | 0.873145938 | 1.68259763   | 0           | 0           | 0           |
| ENSMUSG000000059187  | -0.43099251  | -0.775383365 | 0.150136483 | 0.698404965 | 0.999071534 | Fam19a1       | Fam19a1       | FAM19A1 | 0.350900168 | 0.355740266 | 1.279084186 | 0.069382107 | 0.654025616 | 1.091432423 | 0.19414588   | 0           | 0.628549241 | 0           |
| ENSMUSG000000005575  | -0.086065132 | 6.773466619  | 0.150063201 | 0.698474968 | 0.999071534 | Ube2m         | Ube2m         | UBE2M   | 103.8664496 | 102.4531967 | 134.7750811 | 116.2150285 | 126.2923464 | 157.0935067 | 105.8095048  | 88.63278642 | 71.89031941 | 100.5220874 |
| ENSMUSG000000097694  | 0.311516872  | 0.235064395  | 0.149968462 | 0.698565499 | 0.999071534 | G730013805Rik | G730013805Rik |         | 0.421080201 | 0.770770577 | 2.154247051 | 0.624438959 | 0.850233301 | 0.436572969 | 0.582437641  | 3.246875263 | 0.15713731  | 1.111102397 |
| ENSMUSG000000066705  | -0.311270252 | 0.993016866  | 0.149960189 | 0.698573406 | 0.999071534 | Fxyd6         | Fxyd6         | FXYD6   | 6.596923153 | 0.118580089 | 2.288887492 | 1.040731598 | 0.719428178 | 3.565345915 | 2.394465859  | 0.27632981  | 0.471411931 | 1.830051006 |
| ENSMUSG000000044134  | 0.11911234   | 3.77639555   | 0.14987597  | 0.698653914 | 0.999071534 | Fam109a       | Fam109a       | FAM109A | 20.35220973 | 11.85800888 | 14.94508892 | 10.5460802  | 10.07199449 | 14.84348095 | 19.47930334  | 12.22759407 | 8.32827744  | 14.11753633 |

|                     |              |              |             |             |             |               |               |         |             |             |             |             |             |             |             |             |             |             |
|---------------------|--------------|--------------|-------------|-------------|-------------|---------------|---------------|---------|-------------|-------------|-------------|-------------|-------------|-------------|-------------|-------------|-------------|-------------|
| ENSMUSG00000043157  | -0.148967462 | 3.034355669  | 0.149807895 | 0.698719008 | 0.999071534 | Arl11         | Arll1         | ARL11   | 11.2989854  | 7.292675462 | 7.80914556  | 9.158438064 | 8.436930446 | 11.49642152 | 12.9430587  | 5.664761096 | 3.8498641   | 4.182973728 |
| ENSMUSG00000064068  | 0.089126657  | 5.107544067  | 0.149760151 | 0.698764672 | 0.999071534 | Mtx1          | Mtx1          | MTX1    | 32.77407566 | 24.78323856 | 44.90258697 | 38.57645124 | 31.06621676 | 44.16663204 | 35.20511965 | 28.7383002  | 29.62038297 | 34.31345637 |
| ENSMUSG00000013367  | -0.302795993 | -0.028374262 | 0.149735923 | 0.698787847 | 0.999071534 | Iglon5        | Iglon5        | IGLON5  | 0.701800335 | 1.245090933 | 2.154247051 | 0.416292639 | 0.327012808 | 1.382481069 | 0.129430587 | 0.621742072 | 0.628549241 | 0.980384468 |
| ENSMUSG00000003721  | 0.110282197  | 5.483064002  | 0.149731526 | 0.698792054 | 0.999071534 | Insig2        | Insig2        | INSIG2  | 34.59875654 | 64.68543845 | 37.09344141 | 40.86606076 | 45.58558543 | 26.55818896 | 56.10815945 | 64.17759827 | 35.67016941 | 36.60102012 |
| ENSMUSG00000078864  | 0.287371133  | 0.557369395  | 0.1497303   | 0.698793226 | 0.999071534 | Gm14322       | Gm14322       | ZNF788  | 2.105401006 | 1.067220799 | 0.875162864 | 0           | 2.354492217 | 2.037340523 | 0.970729402 | 1.105319238 | 1.964216377 | 0.980384468 |
| ENSMUSG00000022150  | -0.102976643 | 7.686103455  | 0.14971558  | 0.698807309 | 0.999071534 | Dab2          | Dab2          | DAB2    | 177.4151248 | 268.4653211 | 212.327975  | 195.1718657 | 255.0045877 | 279.4067002 | 156.2227185 | 240.3378519 | 108.5033127 | 197.4494318 |
| ENSMUSG00000027882  | -0.087030373 | 5.354016631  | 0.149697079 | 0.698825009 | 0.999071534 | Stxbp3a       | Stxbp3        | STXBP3  | 36.07253724 | 46.24623464 | 45.37382851 | 34.55228906 | 56.50781322 | 40.89233478 | 46.72444189 | 44.6963467  | 25.45624425 | 34.31345637 |
| ENSMUSG00000056459  | -0.131562729 | 3.010375932  | 0.149693883 | 0.698828117 | 0.999071534 | Zbtb25        | Zbtb25        | ZBTB25  | 10.17610486 | 5.988294485 | 8.213066882 | 10.68484441 | 7.78290483  | 9.677367482 | 6.342098761 | 6.908245239 | 6.049786443 | 7.843075741 |
| ENSMUSG00000056116  | -0.147892183 | 3.795673887  | 0.149692083 | 0.698829789 | 0.999071534 | H2-T22        | H2-T22        |         | 17.61518842 | 25.96903945 | 12.18495988 | 6.383153803 | 13.60373281 | 23.28389169 | 17.27898336 | 10.77686257 | 8.01400282  | 6.078383699 |
| ENSMUSG00000085521  | 0.229476117  | 2.088842115  | 0.149663337 | 0.698857293 | 0.999071534 | 4930526A20Rik | 4930526A20Rik |         | 1.684320805 | 0.652190488 | 3.567971678 | 9.505348597 | 3.858751134 | 3.056010784 | 2.459181152 | 4.283112048 | 5.264099892 | 5.751588876 |
| ENSMUSG00000094338  | 0.446078665  | -0.199433514 | 0.14963702  | 0.698882476 | 0.999071534 | Hist1h2bl     | Hist1h2bl     |         | 0.842160403 | 0.474320355 | 0           | 0           | 1.962076848 | 1.091432423 | 0.129430587 | 1.312566595 | 0           | 1.699333077 |
| ENSMUSG00000098183  | 0.266935072  | 0.49923418   | 0.149594781 | 0.698922901 | 0.999071534 | Gm27010       | Gm27010       |         | 0.210540101 | 1.185800888 | 2.01960661  | 1.387642131 | 1.177246109 | 1.673529715 | 0.517722348 | 0.759906976 | 0.942823861 | 2.941153403 |
| ENSMUSG00000046605  | 0.164060042  | 1.992150938  | 0.149550957 | 0.69896485  | 0.999071534 | B3gnt1        | B3gnt1        | B3GNT1  | 3.859901845 | 2.845922132 | 4.039213221 | 4.787365352 | 3.204725518 | 3.710870238 | 3.17104938  | 5.112101477 | 2.592765618 | 5.032640267 |
| ENSMUSG00000039713  | -0.128843321 | 3.299566135  | 0.149524636 | 0.698990047 | 0.999071534 | Plekkg5       | Plekkg5       | PLEKHG5 | 8.000523824 | 12.74735955 | 12.2522801  | 8.325852786 | 11.44544828 | 15.93491337 | 6.795105815 | 9.53337843  | 5.185531236 | 8.954178137 |
| ENSMUSG00000030309  | 0.172211658  | 3.449511417  | 0.149464515 | 0.699047613 | 0.999071534 | Caprin2       | Caprin2       | CAPRIN2 | 9.404124495 | 5.632554219 | 8.818948865 | 19.91266458 | 8.109917638 | 5.966497245 | 6.018522294 | 11.12227484 | 9.271101302 | 21.63381725 |
| ENSMUSG00000033862  | 0.09188037   | 5.156541256  | 0.149414638 | 0.69909538  | 0.999071534 | Cdk10         | Cdk10         | CDK10   | 37.89721811 | 30.41579278 | 42.74833992 | 37.67448386 | 29.36575016 | 39.50985371 | 26.66270091 | 29.29095982 | 36.06301269 | 44.11730104 |
| ENSMUSG00000056211  | 0.092402642  | 5.31301004   | 0.149371627 | 0.699136579 | 0.999071534 | R3hdm1        | R3hdm1        | R3HDM1  | 28.84399379 | 49.86292735 | 42.88298036 | 32.8871185  | 44.93155982 | 50.93351307 | 25.43311034 | 43.66010991 | 37.16297386 | 40.3264811  |
| ENSMUSG00000031458  | -0.126273994 | 3.122078935  | 0.149358959 | 0.699148714 | 0.999071534 | Coprs         | Coprs         | COPRS   | 10.8779052  | 8.359896261 | 7.80914556  | 9.297202278 | 10.13739705 | 8.804221544 | 10.03087049 | 5.941090906 | 6.914041649 | 7.908434705 |
| ENSMUSG00000081249  | -0.317642211 | 0.074879744  | 0.149237471 | 0.699265126 | 0.999071534 | Gm11517       | Gm11517       |         | 0.561440268 | 0.5336104   | 0.134640441 | 2.775284262 | 1.177246109 | 0.873145938 | 0.582437641 | 1.72706131  | 0.235705965 | 0.588230681 |
| ENSMUSG00000030882  | 0.187024297  | 3.035957463  | 0.149193548 | 0.699307227 | 0.999071534 | Dnhd1         | Dnhd1         | DNHD1   | 5.895122818 | 5.691844263 | 6.058819831 | 11.93372233 | 9.287163747 | 5.457162114 | 1.747312924 | 13.0565835  | 6.992610304 | 13.33322876 |
| ENSMUSG00000078671  | 0.118761274  | 5.262756631  | 0.149130405 | 0.699367763 | 0.999071534 | Chd2          | Chd2          | CHD2    | 27.37021308 | 45.06043375 | 36.75684031 | 41.97617446 | 38.71831646 | 34.12545375 | 14.75508691 | 54.98963211 | 37.7915231  | 46.92773651 |
| ENSMUSG00000024922  | 0.48715179   | -0.59977874  | 0.149114821 | 0.699382706 | 0.999071534 | Ovol1         | Ovol1         | OVOL1   | 0.350900168 | 0.118580089 | 0           | 1.595788451 | 0.130805123 | 0           | 0.323576467 | 1.4507315   | 0           | 1.176461361 |
| ENSMUSG00000004929  | 0.113951971  | 5.476945402  | 0.149064673 | 0.699430798 | 0.999071534 | Thop1         | Thop1         | THOP1   | 58.45996794 | 47.43203553 | 38.30520537 | 27.19778577 | 51.79882878 | 88.1149776  | 56.10815945 | 28.94554755 | 18.14935933 | 44.18266001 |
| ENSMUSG00000040363  | -0.106262113 | 4.089038558  | 0.149060111 | 0.699435173 | 0.999071534 | Bcor          | Bcor          | BCOR    | 18.03626862 | 21.34441599 | 18.10913927 | 11.23990126 | 22.76009144 | 25.03018356 | 16.8259763  | 15.47446934 | 9.821081887 | 13.59466462 |
| ENSMUSG00000019794  | -0.082268877 | 6.219754191  | 0.148988154 | 0.699504195 | 0.999071534 | Katna1        | Katna1        | KATNA1  | 88.7075624  | 82.70961195 | 74.18688282 | 70.21469183 | 82.21101993 | 63.37584269 | 87.68922266 | 72.60565747 | 54.7623526  | 68.88834859 |
| ENSMUSG000000017713 | 0.212305275  | 1.392403122  | 0.148864057 | 0.699623278 | 0.999071534 | Tha1          | Tha1          |         | 4.35116208  | 2.905212176 | 1.009803305 | 1.248877918 | 2.616102464 | 2.764962138 | 1.035444696 | 2.210638477 | 3.221314859 | 3.464025119 |
| ENSMUSG00000055093  | 0.127720887  | 9.474901354  | 0.148843172 | 0.699643324 | 0.999071534 | Gm8430        | Gm8430        |         | 1109.82705  | 697.8438227 | 488.1389177 | 710.6115353 | 527.0138413 | 595.3400056 | 1320.580279 | 525.9937925 | 443.0486461 | 716.5956868 |
| ENSMUSG00000004849  | -0.093264142 | 7.172214743  | 0.1487772   | 0.69970666  | 0.999071534 | Ap1s1         | Ap1s1         | AP1S1   | 189.8369907 | 144.6677084 | 149.3835689 | 135.1563436 | 154.9386684 | 169.1720255 | 184.1150099 | 102.4492769 | 101.9035457 | 123.5938019 |
| ENSMUSG00000052534  | -0.121239219 | 6.831662443  | 0.14876603  | 0.699717384 | 0.999071534 | Pbx1          | Pbx1          | PBX1    | 77.54893706 | 116.208487  | 136.0541653 | 134.9481972 | 148.9216328 | 91.38927487 | 44.32997603 | 151.3596532 | 103.7891934 | 124.5088274 |
| ENSMUSG00000046324  | 0.094536856  | 5.654817144  | 0.148763603 | 0.699719714 | 0.999071534 | Ermp1         | Ermp1         | ERMP1   | 54.24916593 | 54.42826077 | 46.78755314 | 47.45736088 | 49.64054425 | 70.21548587 | 77.20534512 | 28.04747567 | 33.15597245 | 47.84276202 |
| ENSMUSG000000019124 | 0.117618295  | 3.344849631  | 0.14874141  | 0.699741025 | 0.999071534 | Scrn1         | Scrn1         | SCRN1   | 9.12340436  | 7.589125684 | 10.29999371 | 9.505348597 | 13.47292769 | 11.93299449 | 10.16030108 | 9.947873145 | 8.32827744  | 10.19599846 |
| ENSMUSG000000026426 | 0.103383649  | 6.203041638  | 0.148738728 | 0.69974736  | 0.999071534 | Arl8a         | Arl8a         | ARL8A   | 51.72268472 | 72.096694   | 93.10386473 | 69.72901708 | 81.03377382 | 67.37776157 | 45.6889972  | 111.4990782 | 67.41190607 | 70.13016891 |
| ENSMUSG000000074890 | 0.175686135  | 1.980450716  | 0.148737298 | 0.699744974 | 0.999071534 | Lcmt2         | Lcmt2         | LCMT2   | 4.912602348 | 3.794562842 | 3.837252559 | 1.873316877 | 4.316569065 | 6.621356699 | 5.694945826 | 2.901463001 | 1.492804447 | 3.660102012 |
| ENSMUSG000000024799 | -0.156318541 | 2.290408554  | 0.148731321 | 0.699750714 | 0.999071534 | Tm7sf2        | Tm7sf2        | TM7SF2  | 7.93034379  | 5.336103997 | 3.500651458 | 4.162926393 | 5.232204928 | 4.656778337 | 5.177223478 | 3.17779281  | 4.871256616 | 3.594743048 |
| ENSMUSG00000085492  | 0.16700408   | 2.329776106  | 0.148716353 | 0.699765087 | 0.999071534 | Trmt61b       | Trmt61b       |         | 5.193322482 | 2.608761954 | 6.462741153 | 4.093544286 | 5.624620297 | 5.384399953 | 9.189571674 | 3.246875263 | 3.8498641   | 3.464025119 |
| ENSMUSG00000039878  | -0.336123885 | 0.213791264  | 0.148683436 | 0.699796703 | 0.999071534 | Slc39a5       | Slc39a5       | SLC39A5 | 0.280720134 | 0.118580089 | 2.625488593 | 2.150845303 | 0.719428178 | 0.654859454 | 0.19414588  | 1.4507315   | 1.492804447 | 0.392153787 |
| ENSMUSG00000057156  | -0.18059919  | 1.803672984  | 0.148666668 | 0.699812808 | 0.999071534 | Homez         | Homez         | HOMEZ   | 3.087921476 | 5.098943819 | 2.356207712 | 4.856747458 | 3.008517833 | 2.473913492 | 1.941458804 | 4.352194501 | 2.828471584 | 3.33330719  |
| ENSMUSG00000048581  | 0.144088692  | 2.871226696  | 0.14865662  | 0.69982246  | 0.999071534 | E130311K13Rik | E130311K13Rik | C3orf33 | 4.77242281  | 8.656346483 | 5.654898509 | 6.938210655 | 9.41796887  | 6.112021568 | 5.306654065 | 8.704389002 | 6.992610304 | 8.692742279 |
| ENSMUSG00000027799  | 0.106794772  | 3.905249953  | 0.148642653 | 0.699835876 | 0.999071534 | Nbea          | Nbea          | NBEA    | 15.01852718 | 14.70393101 | 15.2143698  | 15.40282765 | 13.7999405  | 21.82864846 | 11.06631518 | 11.74401691 | 11.78529826 | 19.1501766  |

|                     |              |              |             |             |             |               |               |          |             |             |             |             |             |             |             |             |             |             |
|---------------------|--------------|--------------|-------------|-------------|-------------|---------------|---------------|----------|-------------|-------------|-------------|-------------|-------------|-------------|-------------|-------------|-------------|-------------|
| ENSMUSG00000026914  | 0.120501907  | 7.28254017   | 0.148639465 | 0.699838939 | 0.999071534 | Psmid14       | Psmid14       | PSMD14   | 215.3825229 | 146.3278296 | 143.3247491 | 130.0220677 | 141.2041305 | 171.7914634 | 307.2682134 | 88.49462152 | 96.40373981 | 130.5872111 |
| ENSMUSG00000079224  | 0.220243002  | 3.334376749  | 0.14863688  | 0.699841423 | 0.999071534 | Gm6565        | Gm6565        |          | 16.63266795 | 10.25717768 | 8.482347763 | 3.538487434 | 9.352566308 | 14.5524323  | 26.72741621 | 6.908245239 | 0.707117896 | 5.555511983 |
| ENSMUSG000000021700 | 0.321502792  | -0.089354419 | 0.148596916 | 0.699879818 | 0.999071534 | Rab3c         | Rab3c         | RAB3C    | 0.561440268 | 0.415030311 | 2.154247051 | 0.485674746 | 0.130805123 | 0.727621615 | 0.258861174 | 1.381649048 | 1.257098482 | 0.588230681 |
| ENSMUSG00000038024  | -0.091967407 | 4.635228182  | 0.148517787 | 0.699955857 | 0.999071534 | Dennd4c       | Dennd4c       | DENND4C  | 24.63319177 | 29.40786203 | 21.20586941 | 24.90817625 | 32.50507311 | 35.43517266 | 23.75051271 | 23.83344608 | 14.77090716 | 20.65343278 |
| ENSMUSG00000026775  | 0.095247925  | 6.850864927  | 0.148450632 | 0.700020409 | 0.999071534 | Yme1l1        | Yme1l1        | YME1L1   | 128.2891013 | 135.2405913 | 96.73915663 | 97.06556706 | 123.3492312 | 108.997718  | 179.71437   | 99.34056654 | 87.60405043 | 99.21490812 |
| ENSMUSG00000021464  | 0.415471257  | -0.173442185 | 0.14837117  | 0.700096811 | 0.999071534 | Ror2          | Ror2          | ROR2     | 1.894860906 | 0.355740266 | 0.06732022  | 0.624438959 | 0.39241537  | 1.018670261 | 2.523896446 | 0           | 0           | 0.784307574 |
| ENSMUSG00000091228  | -0.600883092 | 3.854863543  | 0.148307974 | 0.700157591 | 0.999071534 | Gm20390       | Gm20390       | NME1     | 78.74199763 | 5.751134307 | 0           | 0           | 7.455892022 | 19.35473496 | 39.7351902  | 0.138164905 | 0           | 0           |
| ENSMUSG00000035278  | 0.088294889  | 5.868061809  | 0.147953408 | 0.700498877 | 0.999071534 | Plekhl1       | Plekhl1       | PLEKHJ1  | 67.3728322  | 48.38067624 | 55.40454134 | 55.02001049 | 67.56084613 | 52.02494549 | 86.26548621 | 58.37467227 | 44.46985879 | 47.77740305 |
| ENSMUSG00000070639  | 0.126711246  | 4.132313707  | 0.147847879 | 0.700600545 | 0.999071534 | Lrrc8b        | Lrrc8b        | LRRC8B   | 14.80798708 | 12.45090933 | 21.81175139 | 18.94131509 | 18.11650956 | 41.61995639 | 15.14337867 | 9.878790692 | 11.86386692 | 14.24825426 |
| ENSMUSG00000092130  | 0.171247576  | 2.379216686  | 0.147797314 | 0.700649274 | 0.999071534 | D030025P21Rik | D030025P21Rik |          | 6.035482885 | 2.668051998 | 5.92417939  | 4.371072713 | 5.820827982 | 7.712789121 | 2.523896446 | 2.694215643 | 5.892649132 | 7.189486096 |
| ENSMUSG00000027890  | -0.221806074 | 0.60066363   | 0.147596712 | 0.700842688 | 0.999071534 | Gstm4         | Gstm4         | GSTM4    | 1.684320805 | 1.304380977 | 1.211763966 | 2.358991623 | 1.111843547 | 2.110102684 | 1.29430587  | 1.036236786 | 1.178529826 | 0.653589645 |
| ENSMUSG00000095115  | -0.103755624 | 6.512111045  | 0.147578491 | 0.700860263 | 0.999071534 | Itprlp2       | Itprlp2       | ITPRIPL2 | 86.88288152 | 146.0313794 | 73.64832105 | 86.31134055 | 98.30005008 | 158.1849391 | 101.1500037 | 69.42786466 | 58.06223612 | 53.33291504 |
| ENSMUSG00000041890  | 0.085673539  | 5.381737935  | 0.147569141 | 0.700869282 | 0.999071534 | Git2          | Git2          | GIT2     | 33.61623607 | 47.31345544 | 40.93069397 | 37.74386596 | 50.03295962 | 52.97085359 | 33.7166679  | 52.50266382 | 27.42046063 | 42.67940382 |
| ENSMUSG00000050103  | -0.245761087 | 0.510678282  | 0.147544887 | 0.70089268  | 0.999071534 | Agmo          | Agmo          | AGMO     | 2.526481208 | 2.490181865 | 0.336601102 | 0.971349492 | 0.981038424 | 1.382481069 | 1.100159989 | 0.828989429 | 1.021392516 | 1.372538255 |
| ENSMUSG00000046223  | 0.115553616  | 6.580104649  | 0.147535171 | 0.700902054 | 0.999071534 | Plaur         | Plaur         | PLAUR    | 120.0078574 | 104.2911881 | 112.2228073 | 59.18293689 | 83.06125323 | 148.3620473 | 169.2952077 | 65.28291751 | 49.89109599 | 64.18250314 |
| ENSMUSG00000078676  | -0.092367995 | 5.460835048  | 0.147381016 | 0.701050822 | 0.999071534 | Casc3         | Casc3         | CASC3    | 48.28386308 | 47.49132557 | 52.64441231 | 33.23402904 | 54.67654149 | 58.20972922 | 25.23896446 | 50.15386044 | 28.20614718 | 46.86237755 |
| ENSMUSG00000042938  | -0.482398536 | 0.568735803  | 0.147370689 | 0.701060792 | 0.999071534 | Gm14117       | Gm14117       |          | 2.947561409 | 3.142372354 | 0           | 0.277528426 | 1.831271725 | 2.328389169 | 3.494625848 | 0           | 0           | 0           |
| ENSMUSG00000028467  | -0.144504216 | 2.731317062  | 0.147341209 | 0.701089254 | 0.999071534 | Gba2          | Gba2          | GBA2     | 8.632144126 | 7.885575906 | 5.318297407 | 6.03624327  | 7.717502268 | 10.25946477 | 4.918362304 | 7.875399573 | 3.69272679  | 3.986896835 |
| ENSMUSG00000038213  | -0.103634973 | 4.59481349   | 0.147171075 | 0.701253573 | 0.999071534 | Tapbpl        | Tapbpl        | TAPBPL   | 31.86173523 | 20.45506532 | 27.53397012 | 29.55677739 | 19.35915823 | 27.72238354 | 17.02012219 | 16.02712896 | 23.72773384 | 26.86253441 |
| ENSMUSG00000024914  | -0.096260629 | 7.403686433  | 0.147142231 | 0.701281442 | 0.999071534 | Drap1         | Drap1         | DRAP1    | 202.2588567 | 132.2760891 | 194.3534761 | 206.8974417 | 169.0002192 | 160.6588526 | 184.9563088 | 140.4446257 | 121.5457094 | 182.8743827 |
| ENSMUSG00000032667  | 0.100207603  | 6.29009102   | 0.147130041 | 0.701293221 | 0.999071534 | Pon2          | Pon2          | PON2     | 95.02376542 | 79.86368982 | 63.34832734 | 80.34447938 | 72.92385618 | 97.5740586  | 136.0315469 | 55.19687946 | 46.59121247 | 62.94068282 |
| ENSMUSG00000041920  | 0.152152776  | 3.204436739  | 0.147100398 | 0.701321867 | 0.999071534 | Slc16a6       | Slc16a6       | SLC16A6  | 14.73780704 | 12.21374915 | 5.789538949 | 2.914048475 | 9.614176555 | 12.51509178 | 11.13103048 | 8.428059192 | 6.442629718 | 8.431306421 |
| ENSMUSG00000056735  | -0.336279269 | -0.163454305 | 0.14708071  | 0.701340894 | 0.999071534 | A930024E05Rik | A930024E05Rik |          | 0.210540101 | 1.067220799 | 0.875162864 | 0.832585279 | 1.373453794 | 0.218286485 | 0.453007054 | 1.036236786 | 0           | 1.503256184 |
| ENSMUSG00000018012  | 0.212307847  | 1.794193663  | 0.147038341 | 0.701381846 | 0.999071534 | Rac3          | Rac3          | RAC3     | 7.93034379  | 3.320242487 | 1.009803305 | 2.150845303 | 1.765869163 | 6.766881022 | 3.882917609 | 2.901463001 | 1.571373102 | 3.006512367 |
| ENSMUSG00000024528  | 0.124494499  | 3.881961375  | 0.146951801 | 0.701465513 | 0.999071534 | Srfbp1        | Srfbp1        | SRFBP1   | 11.57970553 | 21.81873634 | 15.14704958 | 7.770795933 | 16.74305577 | 15.64386473 | 16.76126101 | 20.79381817 | 7.778296855 | 13.39858772 |
| ENSMUSG00000042109  | 0.292071731  | 0.06631411   | 0.146938081 | 0.70147878  | 0.999071534 | Csdc2         | Csdc2         | CSDC2    | 0.421080201 | 1.007930755 | 1.279084186 | 1.110113705 | 0.457817931 | 0.436572969 | 0.323576467 | 0.621742072 | 1.964216377 | 1.241820326 |
| ENSMUSG00000030588  | 0.080928735  | 5.277789424  | 0.14692795  | 0.701488578 | 0.999071534 | Yif1b         | Yif1b         | YIF1B    | 40.63423942 | 38.1827886  | 34.46795281 | 36.21745962 | 45.91259824 | 40.31023748 | 48.47175482 | 36.89002958 | 31.11318742 | 35.09776394 |
| ENSMUSG00000097472  | 0.362270877  | -0.556962428 | 0.146906519 | 0.701509303 | 0.999071534 | Gm26586       | Gm26586       |          | 0.350900168 | 1.126510844 | 0.269280881 | 0.069382107 | 0.654025616 | 0.509335131 | 0.711868228 | 1.312566595 | 0           | 0.457512752 |
| ENSMUSG00000043483  | -0.34640385  | 6.988562286  | 0.146814755 | 0.701598068 | 0.999071534 | Gm6863        | Gm6863        |          | 293.1420001 | 253.7021    | 10.29999371 | 16.58232347 | 179.0068111 | 191.3644848 | 356.7106977 | 24.86968286 | 3.771295445 | 3.071871332 |
| ENSMUSG00000045790  | -0.27399318  | -0.186651443 | 0.146778778 | 0.701632878 | 0.999071534 | Ccdc149       | Ccdc149       | CCDC149  | 0.561440268 | 0.296450222 | 1.279084186 | 0.971349492 | 1.111843547 | 0.582097292 | 0.582437641 | 0.967154334 | 0.392843275 | 0.71894861  |
| ENSMUSG00000039901  | -0.148552257 | 2.732857976  | 0.146716283 | 0.701693356 | 0.999071534 | 9130011E15Rik | 9130011E15Rik | C10orf76 | 9.333944461 | 9.189956883 | 7.337904017 | 4.926129565 | 4.90519212  | 10.69603774 | 6.471529348 | 5.457513739 | 2.671334273 | 5.816947841 |
| ENSMUSG00000046722  | -0.101147136 | 6.956432686  | 0.146617818 | 0.701788675 | 0.999071534 | Cdc42se1      | Cdc42se1      | CDC42SE1 | 166.8881198 | 144.4898382 | 124.2731268 | 109.2768178 | 123.8070491 | 188.3812362 | 167.7420407 | 80.48105704 | 63.87631659 | 98.75739537 |
| ENSMUSG00000023140  | 0.359204302  | 0.187586256  | 0.146589816 | 0.701815789 | 0.999071534 | Reg2          | Reg2          | REG1A    | 0.210540101 | 0.296450222 | 2.221567271 | 1.318260024 | 0.523220493 | 0.291048646 | 0           | 1.519813953 | 1.728510412 | 1.633974113 |
| ENSMUSG00000025364  | 0.104046436  | 7.648935095  | 0.146508352 | 0.701894686 | 0.999071534 | Pa2g4         | Pa2g4         | PA2G4    | 212.0138813 | 172.4154491 | 227.6769852 | 156.7341787 | 238.392337  | 333.1779376 | 258.6023127 | 132.9837209 | 145.1948746 | 162.7438216 |
| ENSMUSG00000043311  | 0.115625662  | 3.762890854  | 0.146484258 | 0.701918026 | 0.999071534 | D17H6553E     | D17H6553E     | C6orf47  | 16.91338808 | 8.47847635  | 19.1862628  | 11.10113705 | 11.38004572 | 14.47967014 | 14.17264927 | 12.43484143 | 12.33527885 | 13.79074151 |
| ENSMUSG00000014907  | -0.097920166 | 4.120113348  | 0.146474648 | 0.701927336 | 0.999071534 | Naf1          | Naf1          | NAF1     | 15.79050755 | 20.45506532 | 16.15685288 | 19.35760773 | 20.79801459 | 23.79322682 | 15.66110102 | 13.81649048 | 11.15674902 | 17.77763835 |
| ENSMUSG00000033938  | 0.109589878  | 6.902365612  | 0.146473067 | 0.701928867 | 0.999071534 | Ndufb7        | Ndufb7        | NDUFB7   | 140.6407872 | 62.25454663 | 137.7371708 | 150.4897891 | 102.2896063 | 95.24566943 | 128.9775799 | 96.7845158  | 120.2100423 | 146.4040805 |
| ENSMUSG00000020042  | 0.141982432  | 3.900664175  | 0.146456258 | 0.701945152 | 0.999071534 | Btbd11        | Btbd11        | BTBD11   | 18.17662869 | 15.41544155 | 13.06012275 | 14.57024238 | 11.83786365 | 29.75972406 | 22.8444986  | 4.62852431  | 9.349669957 | 12.02604947 |
| ENSMUSG00000031513  | -0.077074493 | 6.23748147   | 0.146432785 | 0.701967895 | 0.999071534 | Leptotl1      | Leptotl1      | LEPROTL1 | 75.23299596 | 77.84782831 | 77.88949494 | 86.8663974  | 82.86504554 | 82.80333981 | 77.78778276 | 66.94089637 | 54.21237202 | 74.44386057 |

|                      |              |              |             |             |             |               |               |           |             |             |             |             |             |             |             |             |             |             |
|----------------------|--------------|--------------|-------------|-------------|-------------|---------------|---------------|-----------|-------------|-------------|-------------|-------------|-------------|-------------|-------------|-------------|-------------|-------------|
| ENSMUSG00000036775   | -0.090890574 | 4.807156003  | 0.146134252 | 0.702257322 | 0.999071534 | Decr2         | Decr2         | DECR2     | 28.14219345 | 30.11934256 | 28.81305431 | 26.64272891 | 35.70979863 | 22.70179439 | 22.97392919 | 33.02141224 | 23.57059653 | 26.20894477 |
| ENSMUSG000000085184  | 0.506223821  | -0.568922246 | 0.14608244  | 0.702307588 | 0.999071534 | 4933439K11Rik | 4933439K11Rik |           | 0           | 0           | 0           | 2.22022741  | 0.065402562 | 0.436572969 | 0.19414588  | 0.345412262 | 1.571373102 | 0.392153787 |
| ENSMUSG000000068130  | 0.28181279   | 0.688570553  | 0.146064768 | 0.702324735 | 0.999071534 | Zfp442        | Zfp442        | ZNF788    | 0.771980369 | 3.083082309 | 1.077123525 | 0.069382107 | 1.962076848 | 2.473913492 | 3.041618794 | 0.621742072 | 0.549980586 | 1.437897219 |
| ENSMUSG000000022546  | 0.158501171  | 2.938406642  | 0.145862133 | 0.702521436 | 0.999071534 | Gpt           | Gpt           | GPT       | 6.386383052 | 5.929004441 | 7.203263577 | 11.37866547 | 5.690022859 | 5.675448599 | 4.594785837 | 9.395213526 | 4.871256616 | 13.59466462 |
| ENSMUSG000000037318  | -0.196979363 | 1.548181498  | 0.145739944 | 0.702640123 | 0.999071534 | Traf3ip3      | Traf3ip3      | TRAF3IP3  | 4.140621979 | 3.913142931 | 3.90457278  | 1.873316877 | 1.700466601 | 4.220205368 | 1.035444696 | 1.657978857 | 2.985608894 | 2.745076509 |
| ENSMUSG000000031583  | 0.102714054  | 4.076206436  | 0.14572908  | 0.702650678 | 0.999071534 | Wrn           | Wrn           | WRN       | 15.29924731 | 17.19411288 | 12.2522801  | 19.91266458 | 18.9013403  | 23.72046466 | 13.00777399 | 16.51070612 | 15.47802505 | 15.55543355 |
| ENSMUSG000000045538  | -0.093733653 | 4.509698284  | 0.145672186 | 0.702705963 | 0.999071534 | Ddx28         | Ddx28         | DDX28     | 30.17741442 | 21.2258359  | 20.46534698 | 23.03485937 | 26.74964769 | 29.6869619  | 24.07408917 | 16.37254122 | 13.43524002 | 24.57497065 |
| ENSMUSG000000049421  | 0.083074433  | 5.482184158  | 0.145627825 | 0.702749078 | 0.999071534 | Zfp260        | Zfp260        | ZNF260    | 44.1432411  | 52.41239926 | 39.44964912 | 37.88263018 | 51.40641341 | 43.73005907 | 48.86004658 | 47.87413951 | 42.50564241 | 36.01278944 |
| ENSMUSG000000054808  | -0.100352734 | 8.379208273  | 0.145538798 | 0.702835627 | 0.999071534 | Actn4         | Actn4         | ACTN4     | 304.5111655 | 359.7719895 | 406.5468106 | 348.9226138 | 366.4505526 | 475.1369147 | 239.8995929 | 281.2346637 | 313.0175219 | 253.2006285 |
| ENSMUSG000000040795  | -0.126644251 | 3.087549741  | 0.145323401 | 0.703045155 | 0.999071534 | Iqcc          | Iqcc          | IQCC      | 9.12340436  | 8.063446039 | 7.203263577 | 10.89299073 | 9.941189363 | 9.022508029 | 8.995425794 | 6.148338263 | 5.421237202 | 9.411690889 |
| ENSMUSG000000059657  | -0.16061469  | 2.888343762  | 0.145290557 | 0.70307712  | 0.999071534 | Stfa2l1       | Stfa2l1       | CSTA      | 11.36916543 | 11.79871884 | 5.520258068 | 7.562649614 | 3.597140888 | 3.856394561 | 7.959981098 | 8.289894287 | 5.185531236 | 7.25484506  |
| ENSMUSG000000060373  | 0.096701181  | 8.469279414  | 0.145254428 | 0.703112286 | 0.999071534 | Hnrnpc        | Hnrnpc        | HNRNPCL4  | 381.7793825 | 374.7130807 | 325.0220238 | 326.3734292 | 372.3367832 | 337.0343322 | 463.296786  | 323.7203719 | 271.0618601 | 370.7160467 |
| ENSMUSG000000034928  | 0.085556719  | 5.627640711  | 0.145153956 | 0.703210108 | 0.999071534 | Rnf44         | Rnf44         | RNF44     | 43.23090066 | 51.16730832 | 47.93199688 | 53.84051468 | 51.66802366 | 66.28632915 | 30.86919499 | 55.05871456 | 46.98405575 | 46.33950583 |
| ENSMUSG000000043090  | -0.113039603 | 3.556323649  | 0.145101336 | 0.703261355 | 0.999071534 | Zfp866        | Zfp866        |           | 14.80798708 | 10.90936817 | 10.70391503 | 11.93372233 | 14.51936867 | 15.78938905 | 11.907614   | 11.81309936 | 6.599767028 | 9.084896066 |
| ENSMUSG000000039826  | 0.149564224  | 3.955746393  | 0.14507561  | 0.703286415 | 0.999071534 | Trub2         | Trub2         | TRUB2     | 28.56327365 | 14.17032061 | 9.82875217  | 14.15394974 | 9.221761185 | 23.42941601 | 29.57488912 | 8.635306549 | 6.914041649 | 12.54892118 |
| ENSMUSG000000032624  | -0.091575364 | 4.724152114  | 0.145054882 | 0.703306606 | 0.999071534 | Emi4          | Emi4          | EML4      | 27.79129328 | 28.81496158 | 26.05292527 | 30.87503741 | 27.0766605  | 42.27481584 | 22.45620684 | 20.1720761  | 15.55659371 | 26.60109855 |
| ENSMUSG000000026851  | -0.128841156 | 4.751608303  | 0.144958488 | 0.703400531 | 0.999071534 | BC005624      | BC005624      | C9orf78   | 43.79234093 | 39.48716958 | 13.73332495 | 21.36968882 | 27.99229636 | 41.9837672  | 36.36999494 | 13.40199576 | 11.94243557 | 25.29391926 |
| ENSMUSG000000025894  | 0.127102519  | 5.136401934  | 0.14490525  | 0.70345242  | 0.999071534 | Aasdhppt      | Aasdhppt      | AASDHPPT  | 52.07358489 | 43.10386228 | 30.22677893 | 23.17362359 | 26.35723232 | 36.81765373 | 75.78160866 | 22.24454967 | 20.89926226 | 23.39850929 |
| ENSMUSG000000004099  | 0.09052521   | 5.919105218  | 0.144771108 | 0.703583212 | 0.999071534 | Dnmt1         | Dnmt1         | DNMT1     | 61.89878958 | 53.65749019 | 68.12806299 | 41.14358918 | 80.51055332 | 110.5257234 | 48.6659007  | 53.74614796 | 46.11980054 | 50.97999231 |
| ENSMUSG000000020669  | -0.334815539 | -0.368795607 | 0.14477004  | 0.703584254 | 0.999071534 | Sh3yl1        | Sh3yl1        | SH3YL1    | 0.491260235 | 1.363671021 | 1.413724627 | 0           | 0.457817931 | 0.654859454 | 0.388291761 | 0.759906976 | 0.628549241 | 0.261435858 |
| ENSMUSG000000025790  | -0.088911486 | 5.523233798  | 0.144762989 | 0.703591131 | 0.999071534 | Slco3a1       | Slco3a1       | SLCO3A1   | 35.23037684 | 45.5347541  | 57.69342883 | 59.3217011  | 46.17420849 | 50.27865361 | 34.6873973  | 38.68617334 | 45.17697668 | 44.05194208 |
| ENSMUSG000000069301  | -0.622903031 | -0.573028256 | 0.144679197 | 0.703672868 | 0.999071534 | Hist1h2ag     | Hist1h2ag     |           | 2.807201342 | 0.592900444 | 0           | 0           | 0           | 1.8918162   | 0.453007054 | 0           | 0           | 0           |
| ENSMUSG000000037224  | 0.327768367  | 0.103902622  | 0.144648581 | 0.70370274  | 0.999071534 | Zfyve28       | Zfyve28       | ZFYVE28   | 1.473780704 | 0           | 1.009803305 | 1.595788451 | 0.261610246 | 0.582097292 | 0.776583522 | 0.690824524 | 1.649941757 | 1.176461361 |
| ENSMUSG000000043439  | 0.177113062  | 2.827532561  | 0.144611645 | 0.703738784 | 0.999071534 | E130012A19Rik | E130012A19Rik | C17orf96  | 10.17610486 | 2.608761954 | 6.799342255 | 7.84017804  | 6.474853598 | 16.22596202 | 6.147952881 | 2.486968286 | 7.149747614 | 5.097999231 |
| ENSMUSG000000043153  | 0.265508392  | 1.046765314  | 0.144568988 | 0.703780416 | 0.999071534 | Ispd          | Ispd          | ISPD      | 2.035220973 | 1.600831199 | 1.279084186 | 2.775284262 | 1.308051232 | 2.328389169 | 4.788931717 | 1.312566595 | 0           | 2.156845829 |
| ENSMUSG0000000045962 | -0.10174648  | 7.425009689  | 0.144520084 | 0.703828154 | 0.999071534 | Wnk1          | Wnk1          | WNK1      | 164.2914585 | 235.5593464 | 187.9580552 | 147.9920333 | 189.4058184 | 260.1974896 | 101.1500037 | 131.9474841 | 156.6658983 | 160.129463  |
| ENSMUSG000000062127  | -0.088317201 | 5.935784794  | 0.144391878 | 0.703953348 | 0.999071534 | Ctnnbp2nl     | Ctnnbp2nl     | CTTNBP2NL | 68.07463254 | 89.88370732 | 63.2136869  | 45.02898715 | 62.13243352 | 93.13556675 | 53.584263   | 59.34182661 | 42.97705434 | 43.52907036 |
| ENSMUSG000000073557  | -0.111222104 | 4.359163867  | 0.144257835 | 0.70408431  | 0.999071534 | Ppp1r12b      | Ppp1r12b      | PPP1R12B  | 31.30029496 | 23.53814763 | 16.15685288 | 15.26406344 | 24.46055804 | 37.76356183 | 18.18499747 | 15.9580465  | 9.78219197  | 17.38548456 |
| ENSMUSG000000062203  | 0.107798811  | 6.808956469  | 0.144232171 | 0.704109392 | 0.999071534 | Gspt1         | Gspt1         | GSPT1     | 131.0261226 | 138.9758641 | 89.19929195 | 87.83774689 | 115.1085084 | 203.9523387 | 165.6711513 | 73.84914161 | 59.39790325 | 83.46339767 |
| ENSMUSG000000038527  | -0.147278714 | 2.691303172  | 0.144204961 | 0.704135987 | 0.999071534 | C1rl          | C1rl          | C1RL      | 7.158363421 | 6.640484974 | 4.443134543 | 7.978942253 | 8.240722761 | 4.220205368 | 4.530070544 | 7.944482025 | 5.892649132 | 5.686229912 |
| ENSMUSG000000073856  | 0.195619496  | 1.328430612  | 0.144191725 | 0.704148926 | 0.999071534 | Iqck          | Iqck          | IQCK      | 1.614140771 | 2.075151554 | 3.096730136 | 2.289609516 | 2.419894779 | 2.546675653 | 0.841298815 | 2.556050739 | 2.749902928 | 3.398666154 |
| ENSMUSG000000031360  | -0.084124837 | 6.439143791  | 0.144184719 | 0.704155774 | 0.999071534 | Ctps2         | Ctps2         | CTPS2     | 96.07646592 | 95.51626154 | 79.70714088 | 101.2284935 | 89.53610682 | 72.47111288 | 85.87719445 | 97.68258768 | 69.84753438 | 75.94711675 |
| ENSMUSG000000097211  | 0.291114253  | 0.475243907  | 0.144119186 | 0.704219845 | 0.999071534 | BC065403      | BC065403      |           | 0.280720134 | 1.778701332 | 1.95228639  | 1.110113705 | 0.719428178 | 0.145524323 | 0.517722348 | 1.865226215 | 1.099961171 | 2.810435474 |
| ENSMUSG000000001120  | -0.180143089 | 1.60070403   | 0.143982626 | 0.70435341  | 0.999071534 | Pcbp3         | Pcbp3         | PCBP3     | 3.017741442 | 4.209593153 | 2.692808814 | 2.983430582 | 3.073920395 | 4.147443207 | 4.400639957 | 2.141556024 | 1.178529826 | 1.699333077 |
| ENSMUSG000000061904  | 0.097147303  | 9.523258595  | 0.143935807 | 0.70439922  | 0.999071534 | Slc25a3       | Slc25a3       | SLC25A3   | 934.5875067 | 661.4990254 | 662.4309682 | 734.7565084 | 698.8263707 | 832.1080792 | 924.3932521 | 632.2426043 | 548.5663499 | 759.7979624 |
| ENSMUSG000000074698  | 0.090142559  | 7.087096945  | 0.143905951 | 0.704428436 | 0.999071534 | Csnk2a1       | Csnk2a1       | CSNK2A3   | 103.3050094 | 154.1541155 | 129.5914242 | 130.7852708 | 165.599286  | 168.6626904 | 112.2163189 | 150.5306638 | 116.3601782 | 130.5218521 |
| ENSMUSG000000052632  | -0.108882967 | 4.038138551  | 0.143766387 | 0.704565057 | 0.999071534 | Asap2         | Asap2         | ASAP2     | 16.42212785 | 21.7594463  | 17.43593707 | 12.07248654 | 20.53640434 | 23.50217817 | 10.35444696 | 14.71456236 | 9.506807267 | 19.60768935 |
| ENSMUSG000000030469  | 0.143479325  | 2.828150211  | 0.143739946 | 0.704590948 | 0.999071534 | Zfp719        | Zfp719        |           | 5.614402683 | 8.656346483 | 4.106533441 | 9.505348597 | 6.278645913 | 8.294886414 | 9.513148414 | 6.493750525 | 5.971217787 | 5.163358196 |
| ENSMUSG000000094936  | 0.15167852   | 2.52377706   | 0.143733582 | 0.704597181 | 0.999071534 | Rbm4          | Rbm4          | RBM4      | 7.158363421 | 4.921073686 | 7.405224238 | 3.260959008 | 5.035997243 | 8.949745867 | 6.795105815 | 3.039627905 | 3.928432755 | 6.601255415 |

|                     |              |              |             |             |             |               |               |               |             |             |             |             |             |             |             |             |             |             |
|---------------------|--------------|--------------|-------------|-------------|-------------|---------------|---------------|---------------|-------------|-------------|-------------|-------------|-------------|-------------|-------------|-------------|-------------|-------------|
| ENSMUSG00000031169  | -0.155324886 | 3.417003101  | 0.143710052 | 0.704620225 | 0.999071534 | Porcn         | Porcn         | PORCN         | 10.17610486 | 14.40748079 | 13.80064517 | 8.880909638 | 10.52981242 | 5.529924276 | 4.141778783 | 18.30684988 | 7.228316269 | 11.89533154 |
| ENSMUSG00000031776  | 0.084368015  | 6.366695005  | 0.143673133 | 0.704656386 | 0.999071534 | Arl2bp        | Arl2bp        | ARL2BP        | 91.37440367 | 59.64578467 | 97.14307795 | 89.71106377 | 76.25938682 | 92.69899378 | 90.21311911 | 66.73364901 | 75.97588948 | 82.87516699 |
| ENSMUSG00000018736  | -0.091026922 | 5.96151244   | 0.14362874  | 0.704699875 | 0.999071534 | Ndel1         | Ndel1         | NDEL1         | 64.70599093 | 100.0223049 | 54.86597958 | 45.09836926 | 70.17694859 | 74.43569124 | 74.22844162 | 59.82540377 | 36.06301269 | 51.30678714 |
| ENSMUSG00000024026  | -0.084889937 | 5.85436775   | 0.143615373 | 0.704712971 | 0.999071534 | Glo1          | Glo1          | GLO1          | 67.3728322  | 51.58233863 | 54.39473804 | 63.62339171 | 71.55040239 | 75.38159934 | 67.75691227 | 33.57407186 | 44.78413341 | 52.81004332 |
| ENSMUSG00000027395  | 0.098235571  | 4.506548164  | 0.143611208 | 0.704717052 | 0.999071534 | Polr1b        | Polr1b        | POLR1B        | 29.89669429 | 20.98867572 | 19.05162236 | 18.87193298 | 24.98377853 | 38.70946993 | 24.59181152 | 14.85272726 | 16.9708295  | 20.98022761 |
| ENSMUSG00000022195  | 0.098144163  | 4.276446462  | 0.143572273 | 0.704755203 | 0.999071534 | 6030458C11Rik | 6030458C11Rik | C5orf22       | 17.54500839 | 15.17825137 | 19.45554368 | 23.72868044 | 20.20939153 | 28.23171867 | 17.21426807 | 14.78364481 | 14.92804447 | 22.61420172 |
| ENSMUSG00000009828  | -0.110045679 | 4.062588037  | 0.143509723 | 0.704816506 | 0.999071534 | Ick           | Ick           | ICK           | 12.49204597 | 20.87009563 | 21.13854919 | 16.16603083 | 18.63973005 | 22.04693494 | 9.901439902 | 20.03391119 | 9.742513232 | 16.73189491 |
| ENSMUSG00000041852  | 0.091378499  | 5.240456778  | 0.143444372 | 0.70488057  | 0.999071534 | Tcf20         | Tcf20         | TCF20         | 45.4064817  | 41.02871073 | 29.82285761 | 28.30789947 | 45.91259824 | 66.06804266 | 41.28835724 | 32.88324734 | 24.19914577 | 29.73832885 |
| ENSMUSG00000020680  | 0.098591645  | 6.340604909  | 0.143420361 | 0.704904112 | 0.999071534 | Taf15         | Taf15         | TAF15         | 59.65302851 | 69.60651213 | 103.4038584 | 81.5933573  | 90.64795037 | 91.38927487 | 44.58883721 | 89.59994075 | 67.56904338 | 110.5873679 |
| ENSMUSG00000035891  | -0.105168271 | 4.74115298   | 0.143400702 | 0.704923389 | 0.999071534 | Cerk          | Cerk          | CERK          | 27.30003305 | 42.39238175 | 25.85096461 | 19.28822562 | 29.10413991 | 42.05652936 | 32.87536909 | 20.310241   | 12.72812213 | 20.71879175 |
| ENSMUSG00000051727  | -0.328656024 | -0.232741177 | 0.143336957 | 0.704985906 | 0.999071534 | Kctd14        | Kctd14        | KCTD14        | 1.122880537 | 1.007930755 | 0.403921322 | 1.040731598 | 0.523220493 | 1.382481069 | 0.129430587 | 0.069082452 | 0.15713731  | 1.503256184 |
| ENSMUSG00000043831  | -0.185572945 | 2.077745777  | 0.143307048 | 0.705015244 | 0.999071534 | Lysmd4        | Lysmd4        | LYSMD4        | 5.75476275  | 8.004155995 | 1.548365068 | 2.428373729 | 5.035997243 | 4.001918884 | 5.177223478 | 4.835771668 | 1.964216377 | 2.679717545 |
| ENSMUSG00000020790  | -0.083289633 | 6.283595073  | 0.143236592 | 0.70508437  | 0.999071534 | Ankfy1        | Ankfy1        | ANKFY1        | 84.77748052 | 102.9275171 | 72.43655709 | 79.37312989 | 75.99777657 | 111.9809666 | 56.17287474 | 63.76310356 | 65.84053297 | 71.69878406 |
| ENSMUSG00000074405  | 0.100151488  | 4.295919277  | 0.143194839 | 0.705125343 | 0.999071534 | Zfp865        | Zfp865        | ZNF865        | 17.12392818 | 18.26133368 | 23.42743668 | 15.47220976 | 23.74112986 | 23.93875114 | 13.26663516 | 21.41556024 | 14.14235792 | 25.55535512 |
| ENSMUSG00000024654  | -0.17808307  | 2.187805996  | 0.143145067 | 0.705174195 | 0.999071534 | Asgl1         | Asgl1         | ASRGL1        | 3.017741442 | 2.905212176 | 8.078426441 | 6.244389589 | 3.924153696 | 7.057929668 | 3.235764674 | 2.417885834 | 4.949825271 | 2.548999616 |
| ENSMUSG00000038344  | 0.102042354  | 4.132876664  | 0.143091831 | 0.705226457 | 0.999071534 | Txlng         | Txlng         | TXLNG         | 20.14166963 | 19.74358479 | 12.52156098 | 14.29271395 | 20.86341715 | 15.64386473 | 20.57946333 | 20.37932346 | 13.27810271 | 16.73189491 |
| ENSMUSG00000034488  | -0.120685705 | 4.297949721  | 0.143085296 | 0.705232873 | 0.999071534 | Edi3          | Edi3          | EDIL3         | 16.42212785 | 17.84630337 | 21.34050985 | 26.98963945 | 22.43307863 | 17.46291877 | 14.56094103 | 9.257048621 | 25.69195022 | 20.65343278 |
| ENSMUSG00000079363  | 0.1199983    | 4.72366157   | 0.143037023 | 0.705280275 | 0.999071534 | Gbp4          | Gbp4          | GBP6          | 40.77459949 | 29.58573216 | 16.42613376 | 19.21884351 | 25.63780415 | 26.92199976 | 11.84289871 | 35.23205072 | 23.02061594 | 34.11737947 |
| ENSMUSG00000090175  | 0.742223196  | 2.774336281  | 0.143025016 | 0.705292066 | 0.999071534 | Ugt1a9        | Ugt1a9        | UGT1A8        | 0           | 0           | 0           | 24.56126572 | 0           | 0           | 0           | 0           | 20.42785033 | 15.55543355 |
| ENSMUSG00000036275  | -0.10275385  | 8.172658683  | 0.142971824 | 0.705344311 | 0.999071534 | 9530068E07Rik | 9530068E07Rik | C5orf15       | 311.5291689 | 333.6843699 | 249.623377  | 329.6343882 | 324.919926  | 274.6771597 | 403.3704243 | 258.1611246 | 174.5795516 | 242.0896045 |
| ENSMUSG00000021704  | 0.093114653  | 4.320588558  | 0.142931517 | 0.705383907 | 0.999071534 | Mtx3          | Mtx3          | MTX3          | 23.72085134 | 23.12311732 | 17.57057751 | 14.43147816 | 21.38663764 | 27.14028625 | 17.79670571 | 18.65226215 | 14.22092657 | 26.67956068 |
| ENSMUSG00000096960  | -0.325254769 | -0.158596342 | 0.142863    | 0.70545123  | 0.999071534 | A230028O05Rik | A230028O05Rik |               | 1.965040939 | 0.177870133 | 0.269280881 | 1.318260024 | 0.654025616 | 0.363810808 | 0.776583522 | 0.621742072 | 0.078568655 | 1.437897219 |
| ENSMUSG00000042198  | -0.110417734 | 4.131204977  | 0.142814538 | 0.70549886  | 0.999071534 | Chchd7        | Chchd7        | CHCHD7        | 25.05427197 | 13.7552903  | 20.80194809 | 20.88401407 | 12.9497072  | 17.46291877 | 19.93231039 | 10.70778012 | 16.02800564 | 16.14366423 |
| ENSMUSG00000031398  | -0.099793693 | 5.165948506  | 0.142799402 | 0.705513737 | 0.999071534 | Plkna3        | Plkna3        | PLXNA3        | 33.33551593 | 41.56232113 | 34.19867193 | 34.34414274 | 49.0519212  | 30.63287    | 18.63800452 | 41.24222408 | 28.44185315 | 46.07806998 |
| ENSMUSG00000038352  | 0.176594355  | 1.613145768  | 0.142767786 | 0.705544816 | 0.999071534 | Arl5c         | Arl5c         | ARL5C         | 4.000261912 | 2.786632087 | 1.750325729 | 1.734552664 | 4.120361381 | 3.929156722 | 2.588611739 | 2.141556024 | 3.142746204 | 3.202589261 |
| ENSMUSG00000039652  | -0.191521388 | 1.492114302  | 0.142719619 | 0.705592173 | 0.999071534 | Cpeb3         | Cpeb3         | CPEB3         | 2.737021308 | 2.668051998 | 2.288887492 | 2.844666369 | 4.316569065 | 2.255627007 | 0.841298815 | 3.246875263 | 1.807079067 | 3.856178906 |
| ENSMUSG00000004789  | -0.091163641 | 6.664712659  | 0.14265413  | 0.705656576 | 0.999071534 | Dlst          | Dlst          | DLST          | 132.4297233 | 114.7262359 | 101.6535327 | 86.8663974  | 108.9606676 | 155.6382635 | 123.0237729 | 69.91144182 | 55.78374512 | 85.88167936 |
| ENSMUSG00000049858  | -0.110030293 | 3.991968649  | 0.142616601 | 0.705693489 | 0.999071534 | Suox          | Suox          | SUOX          | 16.84320805 | 20.39577528 | 13.93528561 | 13.11321814 | 21.1250274  | 12.51509178 | 19.34987275 | 18.51409724 | 9.349669957 | 13.46394669 |
| ENSMUSG00000034709  | -0.079114459 | 5.181685766  | 0.142538563 | 0.705770267 | 0.999071534 | Ppp1r21       | Ppp1r21       | PPP1R21       | 36.70415754 | 38.47923882 | 35.27579546 | 37.81324807 | 44.73535213 | 48.82341038 | 35.78755729 | 34.26489639 | 23.02061594 | 31.306944   |
| ENSMUSG00000095687  | 0.116515642  | 5.956423445  | 0.142439146 | 0.705868112 | 0.999071534 | Rnaset2a      | Rnaset2a      | RP11-514O12.4 | 41.89748002 | 32.01662398 | 72.23459643 | 99.84085132 | 58.79690287 | 50.4969401  | 52.35467242 | 68.32254542 | 71.81175076 | 59.54201666 |
| ENSMUSG00000050213  | 0.110387967  | 4.254417798  | 0.142432526 | 0.705874629 | 0.999071534 | Snip1         | Snip1         | SNIP1         | 20.70310989 | 26.91768016 | 14.81044848 | 13.87642131 | 18.77053518 | 24.81189708 | 29.70431971 | 17.13244819 | 12.33527885 | 12.74499808 |
| ENSMUSG00000026162  | -0.209470424 | 1.489537382  | 0.142380235 | 0.705926109 | 0.999071534 | Nhej1         | Nhej1         | NHEJ1         | 2.456301174 | 1.363671021 | 1.95228639  | 4.440454819 | 4.578179312 | 3.34705943  | 2.847472913 | 2.694215643 | 0.392843275 | 3.137230296 |
| ENSMUSG00000036078  | 0.083149828  | 5.617930748  | 0.142360758 | 0.705945288 | 0.999071534 | Sigmar1       | Sigmar1       | SIGMAR1       | 54.03862583 | 42.80741206 | 55.87578288 | 41.97617446 | 52.77986721 | 70.28824803 | 65.88016876 | 38.54800844 | 31.663168   | 42.67940382 |
| ENSMUSG000000002129 | 0.08826497   | 5.751535157  | 0.142315144 | 0.705990207 | 0.999071534 | Sf3a1         | Sf3a1         | SF3A1         | 64.84635099 | 59.70507472 | 46.92219358 | 35.17672802 | 65.7295744  | 93.86318836 | 53.77840888 | 39.99873994 | 41.56281855 | 45.94735205 |
| ENSMUSG000000067081 | -0.263775282 | 0.151187744  | 0.142271499 | 0.706033196 | 0.999071534 | Asb18         | Asb18         | ASB18         | 1.754500839 | 0.355740266 | 1.211763966 | 0.693821065 | 1.569661478 | 1.382481069 | 0.258861174 | 1.036236786 | 0.864255206 | 0.784307574 |
| ENSMUSG00000020154  | -0.160184895 | 2.800445211  | 0.142127595 | 0.70617499  | 0.999071534 | Ptprb         | Ptprb         | PTPRB         | 6.947823321 | 11.85800888 | 8.616988204 | 2.914048475 | 7.39048946  | 12.51509178 | 7.830550511 | 4.62852431  | 3.535589479 | 4.117614764 |
| ENSMUSG00000025980  | 0.106988848  | 8.607288704  | 0.142098195 | 0.706203969 | 0.999071534 | Hspd1         | Hspd1         | HSPD1         | 380.3056018 | 389.4170117 | 409.9801419 | 323.8756734 | 450.4274417 | 619.7880918 | 555.8396557 | 225.3469597 | 257.2337768 | 353.8534338 |
| ENSMUSG00000079014  | -0.298648758 | 0.859319623  | 0.142054446 | 0.706247097 | 0.999071534 | Serpina3i     | Serpina3i     | SERPINA3      | 2.315941107 | 4.328173242 | 1.95228639  | 0.555056852 | 0.523220493 | 3.34705943  | 1.359021163 | 1.036236786 | 1.728510412 | 0           |
| ENSMUSG00000069094  | 0.088894604  | 6.070729184  | 0.142047134 | 0.706254307 | 0.999071534 | Pde7a         | Pde7a         | PDE7A         | 57.68798757 | 62.19525658 | 83.14047212 | 60.77872534 | 73.77408948 | 66.9411886  | 45.04184426 | 85.73132342 | 58.92649132 | 74.31314264 |

|                     |              |              |             |             |             |               |               |               |             |             |             |             |             |             |             |             |             |             |
|---------------------|--------------|--------------|-------------|-------------|-------------|---------------|---------------|---------------|-------------|-------------|-------------|-------------|-------------|-------------|-------------|-------------|-------------|-------------|
| ENSMUSG00000029135  | -0.13615957  | 7.735808835  | 0.142017219 | 0.706283803 | 0.999071534 | Fosl2         | Fosl2         | FOSL2         | 163.8001983 | 325.1466035 | 250.2965792 | 176.6468433 | 245.259606  | 132.1360853 | 92.73701556 | 380.5752302 | 166.0941369 | 184.5737158 |
| ENSMUSG00000030094  | 0.119081636  | 3.803040511  | 0.141920186 | 0.7063795   | 0.999071534 | Xpc           | Xpc           | XPC           | 10.31646493 | 15.17825137 | 12.05031944 | 13.66827499 | 17.59328907 | 16.4442485  | 6.989251696 | 14.09282029 | 13.8280833  | 17.77763835 |
| ENSMUSG00000036061  | 0.113622479  | 3.738637079  | 0.141889359 | 0.706409912 | 0.999071534 | Smug1         | Smug1         | SMUG1         | 13.68510654 | 16.4233423  | 13.53136429 | 8.256470679 | 14.38856355 | 15.06176744 | 20.25588686 | 11.26043974 | 9.585375922 | 10.71887018 |
| ENSMUSG00000078917  | 0.322492822  | -0.388768647 | 0.141876814 | 0.706422288 | 0.999071534 | Gm11281       | Gm11281       |               | 0.140360067 | 0.889350666 | 1.144443746 | 0.069382107 | 0.654025616 | 0.654859454 | 0.582437641 | 1.105319238 | 0.15713731  | 0.915025503 |
| ENSMUSG00000024534  | -0.262570293 | 0.582770887  | 0.141800445 | 0.706497646 | 0.999071534 | Sncalp        | Sncalp        | SNCAIP        | 1.684320805 | 1.660121243 | 2.962089695 | 0.485674746 | 0.981038424 | 1.819054038 | 1.68259763  | 0.207247357 | 1.728510412 | 0.522871716 |
| ENSMUSG00000031862  | 0.078610201  | 5.896450165  | 0.141741929 | 0.706555403 | 0.999071534 | Atp13a1       | Atp13a1       | ATP13A1       | 56.63528707 | 53.59820014 | 67.92610232 | 61.4725464  | 60.03955155 | 81.56638307 | 50.34849833 | 46.00891329 | 50.9124885  | 68.95370755 |
| ENSMUSG00000031626  | 0.226166716  | 0.606374531  | 0.141679619 | 0.706616921 | 0.999071534 | Sorbs2        | Sorbs2        | SORBS2        | 0.771980369 | 1.837991377 | 0.807842644 | 1.318260024 | 1.896674286 | 3.128772945 | 1.359021163 | 0.621742072 | 1.178529826 | 1.241820326 |
| ENSMUSG00000000959  | 0.078198218  | 5.344283835  | 0.141645088 | 0.706651019 | 0.999071534 | Oxa1l         | Oxa1l         | OXA1L         | 38.87973858 | 42.92599215 | 37.43004251 | 35.66240277 | 50.09836218 | 43.43901043 | 36.17584905 | 43.3837801  | 33.47024707 | 44.05194208 |
| ENSMUSG00000042787  | -0.153629116 | 2.890748386  | 0.141608071 | 0.706687576 | 0.999071534 | Exog          | Exog          | EXOG          | 9.263764428 | 6.818355107 | 9.963392611 | 4.787365352 | 9.221761185 | 13.2427134  | 8.801279913 | 3.868617334 | 5.342668547 | 3.267948225 |
| ENSMUSG00000049907  | 0.279304408  | 0.218486715  | 0.141558298 | 0.706736741 | 0.999071534 | Ras11b        | Ras11b        | RASL11B       | 1.684320805 | 1.897281421 | 0.269280881 | 0.277528426 | 0.719428178 | 2.40115133  | 1.29430587  | 0.967154334 | 0.31427462  | 0.784307574 |
| ENSMUSG00000097006  | 0.105040042  | 4.790502487  | 0.14144564  | 0.70684806  | 0.999071534 | 9530082P21Rlk | 9530082P21Rlk |               | 26.31751258 | 25.55400914 | 33.05422819 | 28.30789947 | 24.19894779 | 31.36049162 | 12.9430587  | 26.45857927 | 30.64177549 | 34.64025119 |
| ENSMUSG00000036168  | 0.231733584  | 0.629878585  | 0.141420066 | 0.706873336 | 0.999071534 | Ccdc38        | Ccdc38        | CCDC38        | 1.19306057  | 0.948640711 | 1.683005509 | 2.289609516 | 0.588623054 | 1.600767553 | 0.841298815 | 1.312566595 | 2.278490998 | 1.176461361 |
| ENSMUSG00000014550  | -0.108324959 | 3.914572415  | 0.141360301 | 0.706932417 | 0.999071534 | Zfyve20       | Rbsn          | RBSN          | 14.31672684 | 21.34441599 | 15.61829112 | 13.25198235 | 16.15443271 | 23.28389169 | 17.02012219 | 11.88218181 | 8.563983406 | 10.98030604 |
| ENSMUSG00000051851  | -0.390497757 | -0.522000382 | 0.14130789  | 0.706984239 | 0.999071534 | Cxx1c         | Cxx1c         | FAM127A       | 0.912340436 | 1.719411288 | 0.134640441 | 0           | 0.523220493 | 1.018670261 | 0.776583522 | 0.27632981  | 0           | 0.392153787 |
| ENSMUSG00000019861  | 0.089507967  | 5.187613397  | 0.141283548 | 0.707008311 | 0.999071534 | Gopc          | Gopc          | GOPC          | 29.96687432 | 46.18694459 | 36.01631788 | 25.53261521 | 45.84719568 | 44.8214915  | 30.86919499 | 47.32147989 | 24.27771443 | 35.42455876 |
| ENSMUSG000000063511 | -0.100401439 | 6.787662581  | 0.14126257  | 0.707029059 | 0.999071534 | Snrnp70       | Snrnp70       | SNRNP70       | 169.2742409 | 97.53212305 | 125.2829301 | 94.2902828  | 108.5028497 | 186.5621821 | 84.58288858 | 64.52301054 | 71.57604479 | 125.4238529 |
| ENSMUSG00000052906  | 0.11566994   | 4.184640735  | 0.141254151 | 0.707037386 | 0.999071534 | Ubxn8         | Ubxn8         | UBXN8         | 11.2989854  | 23.47885759 | 18.24377971 | 19.01069719 | 17.65869163 | 21.90141062 | 24.33295035 | 14.23098519 | 19.79930108 | 9.803844676 |
| ENSMUSG00000026356  | 0.080174265  | 6.462086297  | 0.141245494 | 0.707045949 | 0.999071534 | Dars          | Dars          | DARS          | 87.65486189 | 92.61104936 | 80.64962397 | 79.37312989 | 104.9711114 | 101.5032153 | 111.7633118 | 84.48783928 | 68.11902397 | 73.39811714 |
| ENSMUSG00000026116  | -0.09327645  | 5.692316544  | 0.141156777 | 0.707133717 | 0.999071534 | Tmem131       | Tmem131       | TMEM131       | 51.44196459 | 66.46413978 | 41.73853661 | 38.71521545 | 79.92193027 | 72.39835071 | 43.35924663 | 58.72008453 | 26.00622484 | 47.18917237 |
| ENSMUSG00000097242  | 0.277798787  | 0.60724426   | 0.141131145 | 0.707159081 | 0.999071534 | Gm16907       | Gm16907       |               | 0.631620302 | 1.600831199 | 3.096730136 | 1.040731598 | 0.130805123 | 0.9459081   | 0.517722348 | 1.312566595 | 1.649941757 | 2.745076509 |
| ENSMUSG00000040430  | -0.107825675 | 4.757000946  | 0.141014463 | 0.707274574 | 0.999071534 | Pitpnc1       | Pitpnc1       | PITPNC1       | 21.40491023 | 31.00869322 | 32.1117451  | 31.7770048  | 28.05769892 | 22.55627007 | 12.81362811 | 32.95232979 | 26.79191139 | 27.18932923 |
| ENSMUSG00000040029  | -0.101436441 | 4.724026344  | 0.140956279 | 0.707332186 | 0.999071534 | Ipo8          | Ipo8          | IPO8          | 34.38821644 | 29.52644211 | 24.70652087 | 21.36968882 | 32.04725518 | 47.00435634 | 29.31602795 | 15.75079915 | 16.1065743  | 49.1161246  |
| ENSMUSG00000012443  | 0.109120828  | 4.942730193  | 0.140833662 | 0.707453642 | 0.999071534 | Klf11         | Klf11         | KIF11         | 33.96713623 | 22.47092638 | 32.91958775 | 30.11183424 | 33.5515141  | 61.55678865 | 42.84152428 | 19.61941648 | 15.55659371 | 21.96061207 |
| ENSMUSG00000097994  | -0.199675208 | 1.246406996  | 0.140735502 | 0.707550916 | 0.999071534 | Gm26982       | Gm26982       |               | 1.684320805 | 1.126510844 | 2.356207712 | 3.954780073 | 3.204725518 | 1.45524323  | 1.48845175  | 2.556050739 | 1.885647722 | 2.483640651 |
| ENSMUSG00000050697  | -0.076636398 | 6.482839057  | 0.140679798 | 0.707606135 | 0.999071534 | Prkaa1        | Prkaa1        | PRKAA1        | 87.79522196 | 97.59141309 | 98.55680258 | 92.41696592 | 99.47729619 | 103.1039829 | 92.21929321 | 86.76756021 | 60.49786443 | 81.43726977 |
| ENSMUSG00000026586  | 0.085647725  | 6.722244095  | 0.140667718 | 0.707618111 | 0.999071534 | Prrx1         | Prrx1         | PRRX1         | 98.11168689 | 124.8055435 | 97.88360038 | 91.16808801 | 120.4715185 | 131.4812259 | 130.5954622 | 103.071019  | 89.56826681 | 72.22165578 |
| ENSMUSG00000031309  | -0.08675299  | 6.199230895  | 0.140662467 | 0.707623317 | 0.999071534 | Rps6ka3       | Rps6ka3       | RPS6KA3       | 67.93427247 | 91.78098874 | 74.18688282 | 66.67620439 | 92.61002722 | 114.8186909 | 64.00342525 | 78.27041856 | 45.09840803 | 51.24142817 |
| ENSMUSG00000015671  | 0.100872629  | 8.134819395  | 0.140652782 | 0.707632919 | 0.999071534 | Psma2         | Psma2         | RP11-111K18.1 | 296.7913618 | 227.7330606 | 306.9802048 | 315.7579669 | 255.7894184 | 250.44736   | 369.3948952 | 245.4499534 | 248.3555188 | 277.3834454 |
| ENSMUSG00000079478  | -0.094037896 | 4.869418521  | 0.140586719 | 0.707698429 | 0.999071534 | Ssca1         | Ssca1         | SSSCA1        | 33.40569597 | 20.63293545 | 41.06533441 | 29.6261595  | 31.19702188 | 31.79706459 | 34.42853613 | 21.6228076  | 17.20653547 | 32.74484122 |
| ENSMUSG00000030284  | 0.134457981  | 3.399146278  | 0.140583371 | 0.70770175  | 0.999071534 | Crel1         | Crel1         | CRELD1        | 11.86042567 | 8.419186306 | 11.10783636 | 12.00310443 | 7.979112515 | 11.42365936 | 4.853647011 | 13.95465538 | 7.6997282   | 14.77112598 |
| ENSMUSG00000040415  | 0.128490782  | 6.731853404  | 0.140559711 | 0.707725216 | 0.999071534 | Dtx3          | Dtx3          | DTX3          | 96.98880635 | 87.74926572 | 112.5594084 | 102.4773714 | 126.8809695 | 63.52136701 | 48.79533128 | 195.0888456 | 68.51186725 | 150.8484901 |
| ENSMUSG00000070354  | -0.192002748 | 1.284731839  | 0.140529582 | 0.707755103 | 0.999071534 | Gm21975       | Gm21975       | EV12B         | 2.947561409 | 2.01586151  | 4.241173882 | 1.665170557 | 1.896674286 | 2.619437815 | 2.588611739 | 2.417885834 | 0.707117896 | 2.287563758 |
| ENSMUSG00000069972  | -0.122335979 | 8.621490418  | 0.140479391 | 0.707804897 | 0.999071534 | Rps13-ps2     | Rps13-ps2     |               | 669.2367999 | 387.2825701 | 306.5089632 | 389.7192925 | 384.1092443 | 392.6246236 | 655.6306382 | 336.0170484 | 159.2586639 | 315.2916448 |
| ENSMUSG00000026535  | -0.082764235 | 6.587580368  | 0.140421338 | 0.707862504 | 0.999071534 | Ifi202b       | Ifi202b       |               | 118.8147968 | 107.3742704 | 91.75746033 | 96.51051021 | 98.95407569 | 78.2920858  | 104.4504837 | 84.21150947 | 76.68300738 | 102.7442922 |
| ENSMUSG00000061536  | 0.134468177  | 3.087385698  | 0.140403534 | 0.707880174 | 0.999071534 | Sec22c        | Sec22c        | SEC22C        | 8.491784059 | 8.182026128 | 8.347707322 | 8.742145425 | 7.586697145 | 18.3360647  | 6.730390522 | 5.664761096 | 5.421237202 | 8.235229528 |
| ENSMUSG00000097792  | 0.220495335  | 0.636940784  | 0.140355592 | 0.707927761 | 0.999071534 | Gm27042       | Gm27042       |               | 1.19306057  | 1.185800888 | 1.077123525 | 1.734552664 | 1.63506404  | 1.528005392 | 0.841298815 | 1.174401691 | 2.514196963 | 1.111102397 |
| ENSMUSG00000074876  | 0.231192571  | 1.431008242  | 0.140172163 | 0.708109919 | 0.999071534 | Spata5l1      | Spata5l1      |               | 3.158101509 | 4.03172302  | 2.288887492 | 0.624438959 | 2.223687094 | 6.621356699 | 4.594785837 | 1.036236786 | 0.707117896 | 1.437897219 |
| ENSMUSG00000032038  | 0.103558333  | 5.067777476  | 0.14017081  | 0.708111263 | 0.999071534 | St3gal4       | St3gal4       | ST3GAL4       | 43.58180083 | 40.3172302  | 24.84116131 | 26.15705417 | 33.09369617 | 44.23939421 | 54.10198535 | 25.62958984 | 26.39906811 | 18.88874074 |
| ENSMUSG000000009905 | 0.090631092  | 5.160942161  | 0.140005728 | 0.708275318 | 0.999071534 | Kdsr          | Kdsr          | KDSR          | 42.73964043 | 33.49887509 | 33.99671127 | 29.27924896 | 40.3533805  | 37.69079967 | 54.23141594 | 28.8764651  | 30.72034414 | 25.81679098 |

|                     |              |              |             |             |             |         |         |         |             |             |             |             |             |             |             |             |             |             |
|---------------------|--------------|--------------|-------------|-------------|-------------|---------|---------|---------|-------------|-------------|-------------|-------------|-------------|-------------|-------------|-------------|-------------|-------------|
| ENSMUSG00000038366  | -0.09501455  | 7.527422481  | 0.139997907 | 0.708281304 | 0.999071534 | Lasp1   | Lasp1   | LASP1   | 186.6087092 | 226.8437099 | 200.2103353 | 160.4808124 | 217.2019071 | 251.1022194 | 121.2117447 | 207.1091923 | 136.002342  | 157.0575917 |
| ENSMUSG000000027175 | 0.146249141  | 2.406359589  | 0.139968898 | 0.708311934 | 0.999071534 | Tcp11l1 | Tcp11l1 | TCP11L1 | 4.772242281 | 5.039653775 | 4.847055865 | 6.313771696 | 4.381971627 | 5.74821076  | 6.924536402 | 4.352194501 | 2.671334273 | 6.928050238 |
| ENSMUSG00000039382  | 0.107617614  | 5.251238156  | 0.13988856  | 0.708391824 | 0.999071534 | Wdr45   | Wdr45   | WDR45   | 37.68667801 | 33.14313482 | 38.10324471 | 40.2416218  | 40.22257538 | 20.15511874 | 26.46855503 | 46.63065537 | 36.69156193 | 54.44401743 |
| ENSMUSG000000000127 | 0.097095268  | 4.515778079  | 0.139862909 | 0.708417337 | 0.999071534 | Fer     | Fer     | FER     | 22.52779077 | 30.06005251 | 17.36861685 | 15.33344555 | 29.56195784 | 26.63095112 | 27.18042326 | 23.34986891 | 15.00661312 | 22.61420172 |
| ENSMUSG00000032717  | -0.18326814  | 1.402359973  | 0.139771866 | 0.708507914 | 0.999071534 | Mdfl    | Mdfl    | MDFI    | 3.930081878 | 1.719411288 | 4.308494102 | 1.734552664 | 2.223687094 | 2.546675653 | 2.459181152 | 1.657978857 | 2.278490998 | 2.352922722 |
| ENSMUSG00000038172  | -0.076380025 | 5.879108513  | 0.139722919 | 0.708556624 | 0.999071534 | Ttc39b  | Ttc39b  | TTC39B  | 64.77617096 | 74.52758582 | 61.59800161 | 48.7062388  | 64.35612061 | 70.28824803 | 54.29613123 | 64.31576318 | 42.66277972 | 46.73165962 |
| ENSMUSG00000001420  | -0.282149204 | -0.209399873 | 0.139628065 | 0.708651046 | 0.999071534 | Tmem79  | Tmem79  | TMEM79  | 0.491260235 | 0.355740266 | 1.481044848 | 1.387642131 | 0.39241537  | 0.873145938 | 0.582437641 | 0.345412262 | 0.392843275 | 1.045743432 |
| ENSMUSG000000021365 | -0.087672073 | 5.641843973  | 0.139582669 | 0.708696249 | 0.999071534 | Nedd9   | Nedd9   | NEDD9   | 52.28412499 | 75.77267675 | 40.19017154 | 36.56437015 | 63.1788745  | 54.71714546 | 44.71826779 | 59.0654968  | 32.52742321 | 43.85586518 |
| ENSMUSG000000043333 | 0.125392575  | 3.632131842  | 0.139545501 | 0.708733265 | 0.999071534 | Rhbdl2  | Rhbdl2  | RHBDL2  | 12.91312617 | 13.69600026 | 9.088229746 | 8.672763319 | 16.93926345 | 11.3508972  | 18.8321504  | 14.71456236 | 5.499805857 | 12.09140843 |
| ENSMUSG000000064030 | 0.083672082  | 5.041506441  | 0.139403905 | 0.708874332 | 0.999071534 | Wbg     | Pym1    | PYM1    | 37.12523774 | 26.32477972 | 31.30390246 | 30.66689109 | 40.28797794 | 36.16279428 | 36.62885611 | 35.78471034 | 20.11357571 | 35.94743048 |
| ENSMUSG000000003814 | -0.097136296 | 10.18567132  | 0.139387015 | 0.708891164 | 0.999071534 | Calr    | Calr    | CALR    | 1294.961979 | 1303.847367 | 1207.657433 | 1082.777155 | 1373.846209 | 1301.569545 | 1505.342442 | 1051.711255 | 782.1509615 | 847.8364876 |
| ENSMUSG000000047880 | 0.285170824  | 0.394492206  | 0.139306587 | 0.708971334 | 0.999071534 | Cxcr5   | Cxcr5   | CXCR5   | 0.912340436 | 1.126510844 | 2.356207712 | 0.138764213 | 1.046440986 | 0.363810808 | 0.388291761 | 2.141556024 | 1.021392516 | 2.156845829 |
| ENSMUSG000000091735 | -0.367711334 | 0.377329379  | 0.139273765 | 0.709004058 | 0.999071534 | Gpr62   | Gpr62   | GPR62   | 0           | 2.075151554 | 0.403921322 | 3.607869541 | 0.588623054 | 0.218286485 | 0.064715293 | 0.967154334 | 1.649941757 | 1.699333077 |
| ENSMUSG000000021583 | -0.083203467 | 5.713354543  | 0.139081379 | 0.709195959 | 0.999071534 | Erap1   | Erap1   | ERAP1   | 64.70599093 | 64.74472849 | 51.76924944 | 50.78770199 | 47.87467509 | 85.71382627 | 52.35467242 | 37.64993655 | 33.54881573 | 44.24801897 |
| ENSMUSG000000034059 | -0.214922197 | 2.091869179  | 0.139054894 | 0.709222389 | 0.999071534 | Ypel4   | Ypel4   | YPEL4   | 2.596661241 | 4.446753331 | 4.039213221 | 7.076974868 | 4.643581873 | 0.727621615 | 1.68259763  | 8.013564478 | 2.121353688 | 5.359435089 |
| ENSMUSG000000056598 | -0.300790783 | -0.129960938 | 0.139039292 | 0.70923796  | 0.999071534 | Lrrc48  | Lrrc48  | DRC3    | 0.140360067 | 0.5336104   | 1.279084186 | 1.248877918 | 1.24264867  | 0.291048646 | 0.388291761 | 1.588896405 | 0.549980586 | 0.457512752 |
| ENSMUSG000000075376 | 0.096390672  | 5.984611704  | 0.138906915 | 0.709370114 | 0.999071534 | Rc3h2   | Rc3h2   | RC3H2   | 45.75738187 | 52.53097934 | 80.44766331 | 75.14082139 | 61.41300534 | 52.09770765 | 50.21906774 | 62.38145451 | 73.69739848 | 68.23475894 |
| ENSMUSG000000022883 | -0.167302115 | 1.950965307  | 0.138868191 | 0.709408786 | 0.999071534 | Robo1   | Robo1   | ROBO1   | 2.666841275 | 6.166164618 | 5.385617627 | 4.02416218  | 2.158284533 | 3.783632399 | 3.365195261 | 2.832380548 | 3.355589479 | 3.33330719  |
| ENSMUSG000000029923 | -0.348990048 | -0.108134095 | 0.138726069 | 0.709550771 | 0.999071534 | Rab19   | Rab19   | RAB19   | 1.263240604 | 0.059290044 | 2.490848153 | 0           | 0.850233301 | 1.236956746 | 0.388291761 | 0.621742072 | 0.549980586 | 0.653589645 |
| ENSMUSG000000020334 | -0.143567736 | 3.070174478  | 0.138686471 | 0.709590345 | 0.999071534 | Slc22a4 | Slc22a4 | SLC22A4 | 9.193584394 | 13.45884008 | 5.183656966 | 7.007592761 | 10.39900729 | 5.675448599 | 6.665675228 | 10.50053276 | 4.399844685 | 10.52279329 |
| ENSMUSG000000009281 | 0.178403408  | 3.61224379   | 0.138556249 | 0.709720535 | 0.999071534 | Rarres2 | Rarres2 | RARRES2 | 20.35220973 | 6.521904885 | 13.19476319 | 9.435966491 | 9.614176555 | 23.50217817 | 27.43928444 | 3.868617334 | 4.714119306 | 6.078383699 |
| ENSMUSG000000022753 | 0.285830409  | 0.565859887  | 0.138524043 | 0.709752744 | 0.999071534 | Tmem30c | Tmem30c |         | 0.421080201 | 0.5336104   | 0.740522424 | 4.093544286 | 0.327012808 | 0.727621615 | 0.906014109 | 2.417885834 | 1.414235792 | 1.503256184 |
| ENSMUSG000000022808 | -0.084068543 | 5.349091327  | 0.138501234 | 0.709775558 | 0.999071534 | Snx4    | Snx4    | SNX4    | 40.84477952 | 56.68128245 | 37.43004251 | 34.9685817  | 47.87467509 | 64.24898862 | 36.82300199 | 35.85379279 | 26.79191139 | 32.15661054 |
| ENSMUSG000000037072 | 0.105541969  | 9.042547586  | 0.138260346 | 0.710016625 | 0.999071534 | 15-Sep  | 15-Sep  | 15-Sep  | 549.0885824 | 412.0065186 | 548.8617564 | 639.2867297 | 475.4112202 | 466.8420283 | 810.3001897 | 406.2048201 | 443.3629207 | 495.8131047 |
| ENSMUSG000000006215 | -0.09911105  | 4.239759215  | 0.138212401 | 0.710064635 | 0.999071534 | Zbtb17  | Zbtb17  | ZBTB17  | 23.93139144 | 19.03210425 | 22.95619514 | 17.27614453 | 17.65869163 | 23.64770249 | 11.97232929 | 14.09282029 | 16.1065743  | 22.15668897 |
| ENSMUSG000000027514 | -0.107271817 | 4.910606161  | 0.138115996 | 0.710161198 | 0.999071534 | Zbp1    | Zbp1    | ZBP1    | 37.54631794 | 39.07213926 | 25.44704329 | 19.21884351 | 41.26901637 | 29.46867542 | 15.53167044 | 36.89002958 | 19.01361453 | 38.69250699 |
| ENSMUSG000000042570 | 0.087177064  | 5.004120999  | 0.138080417 | 0.710196844 | 0.999071534 | Mier2   | Mier2   | MIER2   | 36.07253724 | 30.11934256 | 27.803251   | 25.74076153 | 41.92304198 | 39.94642668 | 25.8214021  | 41.51855389 | 20.27071302 | 33.46378983 |
| ENSMUSG000000031539 | 0.13085813   | 3.34866876   | 0.137967048 | 0.710310465 | 0.999071534 | Ap3m2   | Ap3m2   | AP3M2   | 12.63240604 | 11.0872383  | 4.914376085 | 8.672763319 | 12.75349951 | 11.3508972  | 7.44225875  | 7.391822406 | 10.68533709 | 13.46394669 |
| ENSMUSG000000066900 | -0.086789438 | 6.476970817  | 0.137930843 | 0.710346761 | 0.999071534 | Suds3   | Suds3   | SUDS3   | 108.9194121 | 107.4928505 | 81.72674749 | 79.23436568 | 99.86971156 | 106.9603774 | 120.7587376 | 75.57620292 | 47.37689902 | 74.77065539 |
| ENSMUSG000000090235 | -0.342924774 | 0.014859584  | 0.137903571 | 0.710374106 | 0.999071534 | Gm16244 | Gm16244 |         | 0.140360067 | 1.126510844 | 1.88496617  | 0.416292639 | 1.569661478 | 0           | 0.388291761 | 1.588896405 | 1.099961171 | 0.392153787 |
| ENSMUSG000000025626 | 0.078439563  | 5.95735253   | 0.137872189 | 0.710405575 | 0.999071534 | Phf6    | Phf6    | PHF6    | 56.9160072  | 55.31761143 | 70.28231004 | 54.74248207 | 76.39019194 | 77.56446418 | 74.48730279 | 52.22633401 | 51.69817505 | 53.65970986 |
| ENSMUSG000000054226 | -0.082989021 | 5.364187347  | 0.137833507 | 0.71044437  | 0.999071534 | Tprkb   | Tprkb   | TPRKB   | 39.93243909 | 36.048347   | 42.81566014 | 55.29753892 | 44.01592395 | 42.56586449 | 41.54721841 | 34.33397884 | 38.81291562 | 33.79058465 |
| ENSMUSG000000025041 | 0.086613822  | 4.677598923  | 0.137798069 | 0.710479917 | 0.999071534 | Nt5c2   | Nt5c2   | NTSC2   | 27.58075318 | 21.28512594 | 28.34181276 | 20.60648565 | 30.80460651 | 35.43517266 | 21.09718567 | 22.10638477 | 20.8206936  | 28.69258542 |
| ENSMUSG000000024811 | 0.086786019  | 7.296485374  | 0.137796245 | 0.710481747 | 0.999071534 | Tnks2   | Tnks2   | TNKS2   | 137.2721456 | 189.0759516 | 153.7593833 | 153.8895123 | 156.5737325 | 185.8345605 | 165.0239984 | 155.5046003 | 138.5165389 | 136.7963127 |
| ENSMUSG000000023235 | 0.130440983  | 3.594264454  | 0.137792211 | 0.710485793 | 0.999071534 | Cc125   | Cc125   | CCL25   | 13.40438641 | 5.632554219 | 15.2143698  | 13.87642131 | 10.85682522 | 10.91432423 | 15.98467749 | 11.19135729 | 6.12835098  | 16.60117698 |
| ENSMUSG000000024597 | 0.087115035  | 5.645997731  | 0.137776105 | 0.710501951 | 0.999071534 | Slc12a2 | Slc12a2 | SLC12A2 | 44.9854015  | 49.56647712 | 52.84637297 | 54.88124628 | 48.5287007  | 79.96561551 | 62.19139703 | 28.53105284 | 36.37728731 | 48.10419788 |
| ENSMUSG00000016319  | 0.110793896  | 8.624516473  | 0.137731526 | 0.710546678 | 0.999071534 | Slc25a5 | Slc25a5 | SLC25A5 | 487.0494328 | 345.6609589 | 401.5651143 | 347.4655896 | 391.6959414 | 567.617622  | 653.6244641 | 222.1000844 | 252.8339321 | 334.3111034 |
| ENSMUSG000000085623 | -0.307629293 | 0.138509753  | 0.13773133  | 0.710546875 | 0.999071534 | Gm16041 | Gm16041 |         | 3.017741442 | 0.296450222 | 0.471241542 | 0.763203172 | 1.046440986 | 0.800383777 | 0.453007054 | 0.759906976 | 0.078568655 | 2.156845829 |
| ENSMUSG000000021245 | 0.177255366  | 2.21849814   | 0.137555721 | 0.71072315  | 0.999071534 | Mlh3    | Mlh3    | MLH3    | 4.982782381 | 5.276813952 | 2.356207712 | 1.595788451 | 8.109917638 | 8.658697221 | 5.565515239 | 2.694215643 | 3.299883514 | 3.790819941 |

|                      |              |              |             |             |             |               |               |          |             |             |             |             |             |             |             |             |             |             |
|----------------------|--------------|--------------|-------------|-------------|-------------|---------------|---------------|----------|-------------|-------------|-------------|-------------|-------------|-------------|-------------|-------------|-------------|-------------|
| ENSMUSG00000092490   | 0.288935098  | 0.417266276  | 0.137522711 | 0.7107563   | 0.999071534 | Gm20482       | Gm20482       |          | 0.98252047  | 3.142372354 | 0.201960661 | 0.693821065 | 0.588623054 | 0.436572969 | 1.423736457 | 0.552659619 | 0.785686551 | 3.071871332 |
| ENSMUSG00000029082   | -0.179511154 | 2.747704466  | 0.13749926  | 0.710779852 | 0.999071534 | Bst1          | Bst1          | BST1     | 13.68510654 | 10.61291795 | 3.231370576 | 3.399723221 | 5.75542542  | 7.276216152 | 7.636404631 | 7.322739954 | 1.414235792 | 7.058768167 |
| ENSMUSG000000062012  | -0.153696539 | 2.185164911  | 0.137380463 | 0.7108992   | 0.999071534 | Zfp13         | Zfp13         | ZNF205   | 7.298723488 | 4.506043375 | 3.298690797 | 4.579219032 | 4.51277675  | 7.057929668 | 3.235764674 | 3.385040167 | 2.357059653 | 4.836563373 |
| ENSMUSG000000086363  | 0.252181795  | 0.831653127  | 0.137318695 | 0.710961278 | 0.999071534 | A330102110Rik | A330102110Rik |          | 2.596661241 | 0.296450222 | 1.481044848 | 2.567137942 | 0.850233301 | 1.236956746 | 0.453007054 | 2.141556024 | 2.592765618 | 1.895409971 |
| ENSMUSG00000022098   | 0.087731542  | 7.186646233  | 0.13726002  | 0.711020261 | 0.999071534 | Bmp1          | Bmp1          | BMP1     | 158.1857956 | 140.4581152 | 181.8992354 | 122.5288002 | 130.4127078 | 197.5492685 | 123.0237729 | 156.7480845 | 104.8105859 | 152.4171052 |
| ENSMUSG000000001173  | -0.079318306 | 5.560205995  | 0.137210953 | 0.711069598 | 0.999071534 | Ocr1          | Ocr1          | OCR1     | 42.17820016 | 56.38483223 | 51.83656966 | 48.22056405 | 52.25664672 | 54.35333466 | 31.90463969 | 47.5978097  | 34.96305152 | 53.398274   |
| ENSMUSG000000018102  | 0.138628514  | 5.782487509  | 0.137095783 | 0.711185439 | 0.999071534 | Hist1h2bc     | Hist1h2bc     |          | 40.14297919 | 56.02909196 | 60.11695677 | 55.85259577 | 58.73150031 | 16.88082147 | 30.99862558 | 103.9000084 | 59.16219729 | 53.46363296 |
| ENSMUSG000000021375  | 0.103190551  | 4.797613068  | 0.136960438 | 0.711321643 | 0.999071534 | Klf13a        | Klf13a        | KIF13A   | 24.14193154 | 32.43165429 | 27.19736902 | 21.71659935 | 33.48611154 | 27.50409706 | 14.10793398 | 30.46536151 | 32.44885456 | 30.84943125 |
| ENSMUSG00000046841   | 0.092818098  | 8.074173099  | 0.136939055 | 0.711343169 | 0.999071534 | Ckap4         | Ckap4         | CKAP4    | 241.9807557 | 243.3856323 | 324.6181025 | 269.8963945 | 271.5514357 | 367.157867  | 269.9274891 | 224.0343931 | 219.2851164 | 277.971676  |
| ENSMUSG000000038828  | -0.081680637 | 5.487673701  | 0.136841017 | 0.711441887 | 0.999071534 | Tmem214       | Tmem214       | TMEM214  | 49.19620351 | 53.36103997 | 45.50846895 | 36.14807751 | 55.65757992 | 65.84975618 | 34.6873973  | 47.7359746  | 28.28471584 | 38.36571216 |
| ENSMUSG000000024941  | -0.080468021 | 6.221579156  | 0.136774027 | 0.711509364 | 0.999071534 | Scyl1         | Scyl1         | SCYL1    | 77.97001726 | 81.52381106 | 85.29471917 | 60.4318148  | 93.78727333 | 87.31459383 | 53.32540183 | 73.29648199 | 51.93388102 | 86.99278176 |
| ENSMUSG000000087701  | -0.410965925 | -0.083540285 | 0.136666137 | 0.711618079 | 0.999071534 | Gm13493       | Gm13493       |          | 1.052700503 | 1.778701332 | 1.279084186 | 0           | 0.719428178 | 0.582097292 | 2.006174098 | 0           | 0.707117896 | 0           |
| ENSMUSG000000022897  | 0.088642263  | 4.801606991  | 0.136482479 | 0.711803252 | 0.999071534 | Dyrk1a        | Dyrk1a        | DYRK1A   | 21.89617047 | 35.5147366  | 24.97580175 | 25.60199732 | 31.78564494 | 33.25230782 | 24.07408917 | 34.12673148 | 24.04200846 | 22.67956068 |
| ENSMUSG000000074417  | 0.51274244   | 0.672607161  | 0.136367458 | 0.711919294 | 0.999071534 | Gm14548       | Gm14548       | LILRA4   | 1.965040939 | 4.150303108 | 0           | 0           | 0.130805123 | 4.365729691 | 4.594785837 | 0           | 0.078568655 | 0           |
| ENSMUSG000000051029  | 0.407318942  | -0.260340926 | 0.136332343 | 0.711954644 | 0.999071534 | Serpinb1b     | Serpinb1b     | SERPINB1 | 0.280720134 | 1.48225111  | 0.06732022  | 0           | 1.308051232 | 0.145524323 | 0.711868228 | 1.4507315   | 0           | 1.503256184 |
| ENSMUSG000000022526  | -0.188211843 | 2.888724641  | 0.136286232 | 0.712001275 | 0.999071534 | Zfp251        | Zfp251        | ZNF251   | 10.456825   | 10.25717768 | 4.914376085 | 5.064893778 | 9.810384239 | 15.57110257 | 11.58403753 | 4.283112048 | 1.257098482 | 2.745076509 |
| ENSMUSG000000027006  | 0.104623315  | 7.337419658  | 0.136101563 | 0.712187763 | 0.999071534 | Dnaj10        | Dnaj10        | DNAI10   | 195.0303132 | 195.7164366 | 119.762672  | 140.5681479 | 159.9092631 | 199.0045118 | 275.1694279 | 118.7527357 | 109.5247052 | 118.7572385 |
| ENSMUSG0000000045180 | -0.239000855 | 1.209058693  | 0.135895796 | 0.712395727 | 0.999071534 | Shroom2       | Shroom2       | SHROOM2  | 0.842160403 | 4.98036373  | 2.692808814 | 1.942698983 | 1.700466601 | 3.783632399 | 2.588611739 | 0.967154334 | 0.15713731  | 2.745076509 |
| ENSMUSG000000038425  | 0.142191783  | 3.036157361  | 0.135875571 | 0.712416177 | 0.999071534 | Poli          | Poli          | POLI     | 7.649623656 | 9.130666839 | 7.135943356 | 7.562649614 | 8.371527884 | 7.057929668 | 3.494625848 | 10.22420295 | 6.678335683 | 13.00643394 |
| ENSMUSG000000003464  | -0.084289746 | 4.776564167  | 0.135805732 | 0.712486807 | 0.999071534 | Pex19         | Pex19         | PEX19    | 28.42291358 | 33.08384478 | 29.95749805 | 26.71211102 | 27.66528356 | 36.38108076 | 31.51634792 | 23.14262155 | 16.1065743  | 23.59458619 |
| ENSMUSG000000053687  | 0.103949016  | 3.848668968  | 0.135789709 | 0.712503015 | 0.999071534 | Dpep2         | Dpep2         | DPEP2    | 19.93112953 | 14.34819075 | 12.18495988 | 12.76630761 | 12.36108414 | 16.22596202 | 11.32517636 | 14.85272726 | 11.5495923  | 17.58156145 |
| ENSMUSG000000050973  | -0.199733514 | 1.501715144  | 0.135788003 | 0.712504741 | 0.999071534 | Gdpgp1        | Gdpgp1        | GDPGP1   | 3.158101509 | 4.328173242 | 1.88496617  | 1.457024238 | 4.251166504 | 4.511254014 | 4.206490476 | 1.934308667 | 0.707117896 | 1.372538255 |
| ENSMUSG000000030075  | 0.357194986  | -0.671585083 | 0.135773012 | 0.712519906 | 0.999071534 | Cntn3         | Cntn3         | CNTN3    | 0.140360067 | 0.059290044 | 0.673202203 | 1.040731598 | 0.327012808 | 0.145524323 | 0.129430587 | 0.483577167 | 0.785686551 | 1.045743432 |
| ENSMUSG000000033773  | 0.090114538  | 4.655552313  | 0.135714748 | 0.712578855 | 0.999071534 | Rpap2         | Rpap2         | RPAP2    | 27.37021308 | 23.71601776 | 20.1960661  | 30.11183424 | 24.32975291 | 22.19245926 | 30.28675735 | 27.08032134 | 17.99222202 | 26.92789338 |
| ENSMUSG000000029627  | -0.146758929 | 2.188541751  | 0.135664511 | 0.712629693 | 0.999071534 | Zkscan14      | Zkscan14      | ZNF394   | 4.912602348 | 4.683913508 | 4.039213221 | 4.579219032 | 5.951633105 | 3.274297269 | 4.46535525  | 5.319348834 | 3.355589479 | 3.398666154 |
| ENSMUSG000000020964  | 0.077510919  | 6.259019802  | 0.135636053 | 0.712658497 | 0.999071534 | Sel1l         | Sel1l         | SEL1L    | 71.30291408 | 86.80062501 | 68.33002365 | 78.12425197 | 81.49159175 | 96.48262618 | 61.80310527 | 70.6713488  | 73.30455521 | 76.73142433 |
| ENSMUSG000000033618  | 0.343503056  | 0.109756811  | 0.135596593 | 0.712698442 | 0.999071534 | Map3k13       | Map3k13       | MAP3K13  | 0.842160403 | 1.660121243 | 0.471241542 | 0           | 1.373453794 | 1.45524323  | 0.517722348 | 1.865226215 | 0           | 1.437897219 |
| ENSMUSG000000038206  | 0.098442145  | 4.679714615  | 0.135486931 | 0.712809487 | 0.999071534 | Fbxo8         | Fbxo8         | FBXO8    | 24.0717515  | 21.10725581 | 21.87907161 | 30.11183424 | 30.34678858 | 18.3360647  | 33.39309144 | 31.01802112 | 21.13496822 | 21.50309932 |
| ENSMUSG000000002249  | -0.122006789 | 3.588534902  | 0.135471558 | 0.712825058 | 0.999071534 | Tead3         | Tead3         | TEAD3    | 9.825204696 | 17.43127306 | 16.02221244 | 9.435966491 | 11.77246109 | 17.0263458  | 6.665675228 | 13.74740803 | 6.599767028 | 12.35284429 |
| ENSMUSG000000004707  | -0.253884269 | 1.501789333  | 0.135355922 | 0.712942214 | 0.999071534 | Ly9           | Ly9           | LY9      | 5.75476275  | 4.209593153 | 1.279084186 | 0.971349492 | 3.204725518 | 5.166113468 | 4.46535525  | 1.036236786 | 1.649941757 | 0.130717929 |
| ENSMUSG000000064288  | 0.296481303  | 1.225944752  | 0.135333223 | 0.712965218 | 0.999071534 | Hist1h4k      | Hist1h4k      | HIST1H4A | 3.649361744 | 3.735272798 | 0.336601102 | 2.01208109  | 0.523220493 | 1.746291877 | 1.48845175  | 4.766689215 | 0           | 3.92153787  |
| ENSMUSG000000030761  | 0.146266144  | 3.392031015  | 0.135287575 | 0.713011487 | 0.999071534 | Myo7a         | Myo7a         | MYO7A    | 13.26402634 | 10.43504782 | 14.33920693 | 4.232308499 | 9.221761185 | 22.1196971  | 6.665675228 | 8.842553906 | 4.792687961 | 13.0717929  |
| ENSMUSG000000039556  | 0.163740514  | 2.017273284  | 0.13528497  | 0.713014127 | 0.999071534 | Ppp1r3f       | Ppp1r3f       | PPP1R3F  | 4.912602348 | 4.091013064 | 3.231370576 | 2.844666369 | 4.185763942 | 4.29296753  | 1.941458804 | 6.63191543  | 2.749902928 | 4.379050622 |
| ENSMUSG000000098789  | 0.173708419  | 2.077183024  | 0.135246828 | 0.713052795 | 0.999071534 | Jmjd7         | Jmjd7         | JMJD7    | 6.73728322  | 5.039653775 | 2.962089695 | 2.22022741  | 3.139322957 | 3.929156722 | 7.765835218 | 2.141556024 | 3.299883514 | 3.790819941 |
| ENSMUSG000000097333  | -0.12952198  | 3.141443231  | 0.135220996 | 0.713078986 | 0.999071534 | Zfp87         | Zfp87         | ZNF99    | 8.421604025 | 10.43504782 | 6.462741153 | 12.07248654 | 9.548773993 | 9.459080998 | 9.124856381 | 10.70778012 | 3.28432755  | 7.516280918 |
| ENSMUSG000000025933  | 0.194110471  | 1.603000359  | 0.135194294 | 0.713106063 | 0.999071534 | Tmem14a       | Tmem14a       | TMEM14A  | 0.701800335 | 2.668051998 | 2.558168373 | 3.677251647 | 4.381971627 | 3.565345915 | 3.818202315 | 1.381649048 | 2.514196963 | 3.790819941 |
| ENSMUSG000000021179  | -0.117444089 | 3.301088905  | 0.134996018 | 0.713307216 | 0.999071534 | Nrde2         | Nrde2         | NRDE2    | 12.7727661  | 10.5536279  | 11.64639812 | 7.146356975 | 10.66061754 | 13.67928637 | 6.859821109 | 7.184575049 | 7.464022234 | 10.58815225 |
| ENSMUSG000000075701  | 0.085866229  | 6.25948683   | 0.134910743 | 0.713393779 | 0.999071534 | Vimp          | Vimp          | VIMP     | 83.23351978 | 70.91089311 | 73.31171995 | 85.06246263 | 71.87741519 | 72.6166372  | 117.522973  | 62.24328961 | 56.09801974 | 72.28701474 |
| ENSMUSG000000024335  | 0.092957471  | 7.70943102   | 0.134628154 | 0.71368086  | 0.999071534 | Brd2          | Brd2          | BRD2     | 215.7334231 | 235.8557967 | 206.4711158 | 178.3120138 | 216.8748943 | 288.1381596 | 138.037721  | 210.0106553 | 190.2932826 | 221.9590435 |

|                     |              |              |             |             |             |               |               |          |             |             |             |             |             |             |             |             |             |             |
|---------------------|--------------|--------------|-------------|-------------|-------------|---------------|---------------|----------|-------------|-------------|-------------|-------------|-------------|-------------|-------------|-------------|-------------|-------------|
| ENSMUSG00000038146  | 0.318306417  | 0.413402509  | 0.13449913  | 0.713812049 | 0.999071534 | Notch3        | Notch3        | NOTCH3   | 1.824680872 | 2.54947191  | 0           | 0.763203172 | 0.39241537  | 3.34705943  | 1.164875283 | 1.588896405 | 0.549980586 | 0.196076894 |
| ENSMUSG000000070436 | 0.093664416  | 9.059122771  | 0.134492061 | 0.713819238 | 0.999071534 | Serpinh1      | Serpinh1      | SERPINH1 | 491.1198747 | 512.9181742 | 524.4918367 | 471.451414  | 684.895625  | 612.5846379 | 690.0591744 | 497.1173274 | 425.0564241 | 445.4867021 |
| ENSMUSG000000035212 | -0.080492672 | 6.52406808   | 0.134463697 | 0.713848089 | 0.999071534 | Leprot        | Leprot        | LEPROT   | 84.49676038 | 82.6503219  | 107.5103919 | 104.5588346 | 110.2033163 | 85.42277763 | 99.40269078 | 94.09030016 | 70.39751497 | 80.39152634 |
| ENSMUSG000000038252 | -0.118223723 | 5.360055763  | 0.134433098 | 0.713879217 | 0.999071534 | Ncapd2        | Ncapd2        | NCAPD2   | 65.96923153 | 32.01662398 | 37.36272229 | 42.32308499 | 44.01592395 | 91.24375055 | 36.04641847 | 15.8198816  | 24.82769501 | 33.26771293 |
| ENSMUSG000000047459 | 0.096994673  | 7.371950066  | 0.134327421 | 0.71398675  | 0.999071534 | Dynlrb1       | Dynlrb1       | DYNLRB1  | 138.6055662 | 139.2130243 | 180.4855107 | 183.8625824 | 185.9394826 | 127.1154962 | 152.7280926 | 197.3685665 | 134.5095375 | 203.4624565 |
| ENSMUSG000000091050 | 0.206211867  | 1.669360159  | 0.134290041 | 0.714024797 | 0.999071534 | 9330020H09Rik | 9330020H09Rik |          | 3.017741442 | 1.007930755 | 4.308494102 | 4.371072713 | 1.896674286 | 2.037340523 | 1.876743511 | 2.556050739 | 5.735511822 | 2.679717545 |
| ENSMUSG000000029650 | -0.158002019 | 1.983860962  | 0.134277599 | 0.714037463 | 0.999071534 | Slc46a3       | Slc46a3       | SLC46A3  | 5.263502516 | 3.735272798 | 4.779735644 | 3.399723221 | 3.793348573 | 5.23887563  | 4.400639957 | 1.72706131  | 3.457020824 | 2.810435474 |
| ENSMUSG000000044636 | -0.105432256 | 3.989141553  | 0.134222234 | 0.714093832 | 0.999071534 | Csrnp2        | Csrnp2        | CSRNP2   | 14.17636678 | 13.57742017 | 20.1960661  | 21.1615425  | 15.10799173 | 20.51892955 | 10.16030108 | 13.33291331 | 12.41384751 | 17.58156145 |
| ENSMUSG000000013736 | 0.110381237  | 5.466644307  | 0.134144028 | 0.714173478 | 0.999071534 | Trnt1         | Trnt1         | TRNT1    | 57.89852767 | 50.3372477  | 45.97971049 | 44.68207662 | 51.07940061 | 68.76024264 | 100.6969967 | 27.77114586 | 29.85608894 | 30.06512367 |
| ENSMUSG000000036087 | 0.074084766  | 6.021745705  | 0.134099584 | 0.714218752 | 0.999071534 | Slain2        | Slain2        | SLAIN2   | 66.1095916  | 73.63823515 | 57.42414795 | 64.38659488 | 66.44900258 | 81.71190739 | 63.80927937 | 59.68723887 | 57.90509881 | 59.08450391 |
| ENSMUSG000000068329 | 0.079739791  | 6.018230589  | 0.134089186 | 0.714229345 | 0.999071534 | Htra2         | Htra2         | HTRA2    | 69.12733304 | 55.6733517  | 74.18688282 | 67.50878967 | 59.45092849 | 84.76791817 | 77.85249806 | 45.59441858 | 52.40529295 | 63.92106729 |
| ENSMUSG000000030413 | -0.177597823 | 1.939011684  | 0.133970776 | 0.714350014 | 0.999071534 | Pglyrp1       | Pglyrp1       | PGLYRP1  | 6.105662918 | 3.557402664 | 4.173853661 | 5.203657991 | 1.24264867  | 2.473913492 | 2.912188207 | 3.937699786 | 3.142746204 | 3.986896835 |
| ENSMUSG000000042328 | -0.137321475 | 3.578427853  | 0.133936665 | 0.714384787 | 0.999071534 | Hps4          | Hps4          | HP54     | 13.75528657 | 15.8897319  | 11.10783636 | 6.730064335 | 17.33167882 | 14.62519447 | 9.319002261 | 9.257048621 | 3.69272679  | 19.21553556 |
| ENSMUSG000000084284 | -0.165163051 | 2.375936896  | 0.133796723 | 0.714527496 | 0.999071534 | Tpt1-ps6      | Tpt1-ps6      |          | 1.965040939 | 7.292675462 | 5.452937848 | 5.897479057 | 7.063476652 | 3.128772945 | 3.17104938  | 6.010173358 | 4.792687961 | 5.294076125 |
| ENSMUSG000000039529 | 0.169154471  | 2.27247259   | 0.133789565 | 0.714534798 | 0.999071534 | Atp8b1        | Atp8b1        | ATP8B1   | 2.877381375 | 5.988294485 | 4.577774983 | 6.660682229 | 2.616102464 | 10.84156207 | 4.46535525  | 2.417885834 | 3.771295445 | 3.660102012 |
| ENSMUSG000000032583 | -0.124599688 | 2.733822239  | 0.133726616 | 0.714599021 | 0.999071534 | Mon1a         | Mon1a         | MON1A    | 6.456563086 | 7.589125684 | 6.933982695 | 6.313771696 | 8.044515076 | 7.203453991 | 5.565515239 | 5.595678644 | 4.949825271 | 6.928050238 |
| ENSMUSG000000022766 | -0.409323684 | -0.489975993 | 0.133709026 | 0.71461697  | 0.999071534 | Serpind1      | Serpind1      | SERPIND1 | 2.38612114  | 0.889350666 | 0.134640441 | 0           | 0.065402562 | 0.218286485 | 1.423736457 | 0.069082452 | 0.31427462  | 0.326794823 |
| ENSMUSG000000026827 | 0.077513923  | 6.032722214  | 0.133677121 | 0.71464953  | 0.999071534 | Gpd2          | Gpd2          | GPD2     | 60.14428875 | 62.72886698 | 74.05224238 | 64.73350541 | 68.08406662 | 76.90960473 | 58.5673406  | 55.33504437 | 68.35472994 | 62.48317007 |
| ENSMUSG000000023046 | -0.112758441 | 4.044342444  | 0.133639959 | 0.71468746  | 0.999071534 | Igfbp6        | Igfbp6        | IGFBP6   | 20.84346996 | 17.37198301 | 14.60848781 | 16.65170557 | 18.96674286 | 13.46099988 | 28.41001384 | 11.67493445 | 9.48238612  | 13.33322876 |
| ENSMUSG000000028532 | 0.110348599  | 3.570263747  | 0.133618257 | 0.714709614 | 0.999071534 | Cachd1        | Cachd1        | CACHD1   | 12.07096577 | 10.73149804 | 12.5888812  | 10.96237283 | 12.29568158 | 15.57110257 | 9.642578728 | 8.497141644 | 13.67094599 | 11.17638293 |
| ENSMUSG000000063354 | -0.360589981 | -0.089623407 | 0.133599204 | 0.714729066 | 0.999071534 | Slc39a4       | Slc39a4       | SLC39A4  | 0.070180034 | 1.007930755 | 1.95228639  | 1.387642131 | 0.196207685 | 1.236956746 | 0.388291761 | 1.657978857 | 0.235705965 | 0           |
| ENSMUSG000000003200 | -0.079064286 | 5.998822237  | 0.133473048 | 0.714857896 | 0.999071534 | Sh3gl1        | Sh3gl1        | SH3GL1   | 68.98697297 | 64.38898823 | 73.85028171 | 50.51017357 | 84.10769421 | 89.642983   | 47.630456   | 64.24668073 | 45.64838861 | 57.71196566 |
| ENSMUSG000000030611 | 0.093214509  | 4.944832058  | 0.133436856 | 0.714894869 | 0.999071534 | Mrps11        | Mrps11        | MRP511   | 30.31777449 | 20.09932505 | 39.0457278  | 32.95650061 | 31.26242444 | 32.81573485 | 46.14200425 | 23.48803381 | 23.33489056 | 27.77755991 |
| ENSMUSG000000047037 | 0.126913204  | 3.899723391  | 0.13337999  | 0.714952972 | 0.999071534 | Nipa1         | Nipa1         | NIPA1    | 14.10618674 | 11.68013875 | 12.45424076 | 19.84328247 | 14.91178404 | 17.68120525 | 26.59798562 | 7.253657501 | 13.74951464 | 9.542408818 |
| ENSMUSG000000038152 | 0.189036971  | 1.541650884  | 0.133341413 | 0.714992396 | 0.999071534 | 5033430I15Rik | 5033430I15Rik |          | 2.877381375 | 1.600831199 | 3.096730136 | 3.260959008 | 2.616102464 | 2.837724299 | 0.970729402 | 2.210638477 | 3.771295445 | 4.182973728 |
| ENSMUSG000000032718 | 0.193432427  | 1.226767782  | 0.133339799 | 0.714994046 | 0.999071534 | Mansc1        | Mansc1        | MANSC1   | 1.894860906 | 2.075151554 | 2.558168373 | 2.497755836 | 1.63506404  | 2.837724299 | 1.68259763  | 2.832380548 | 3.064177549 | 0.784307574 |
| ENSMUSG000000040158 | 0.082358508  | 6.226658199  | 0.133326779 | 0.715007354 | 0.999071534 | Tax1bp3       | Tax1bp3       | TAX1BP3  | 67.3728322  | 62.84744707 | 90.20909526 | 65.35794437 | 91.75979392 | 65.63146969 | 73.51657339 | 88.42553906 | 59.47647191 | 81.24119288 |
| ENSMUSG000000032849 | 0.104715465  | 4.665387491  | 0.133309727 | 0.715024784 | 0.999071534 | Abcc4         | Abcc4         | ABCC4    | 34.24785637 | 30.11934256 | 23.69671756 | 16.44355925 | 22.56388375 | 40.96509694 | 38.24673845 | 17.54694291 | 15.32088774 | 18.43122799 |
| ENSMUSG000000063659 | 0.0860673    | 5.018649047  | 0.133213746 | 0.715122914 | 0.999071534 | Zbtb18        | Zbtb18        | ZBTB18   | 33.0547958  | 24.4274983  | 28.88037453 | 36.84189858 | 39.11073183 | 35.21688618 | 25.69197151 | 40.82772936 | 28.28471584 | 29.73832885 |
| ENSMUSG000000020973 | 0.120071884  | 4.048649729  | 0.133145303 | 0.715192915 | 0.999071534 | Dnaaf2        | Dnaaf2        | DNAAF2   | 21.5452703  | 13.69600026 | 14.20456649 | 14.57024238 | 17.92030188 | 30.70563216 | 25.8214021  | 9.257048621 | 8.406846095 | 12.28748533 |
| ENSMUSG000000035678 | -0.180725908 | 2.080471009  | 0.133124226 | 0.715214476 | 0.999071534 | Tnfsf9        | Tnfsf9        | TNFSF9   | 2.456301174 | 5.869714396 | 3.164050356 | 5.61995063  | 5.363010051 | 4.511254014 | 6.471529348 | 4.973936572 | 1.099961171 | 1.960768935 |
| ENSMUSG000000046876 | -0.101449272 | 4.072049687  | 0.133064643 | 0.715275436 | 0.999071534 | Atxn1         | Atxn1         | ATXN1    | 13.89564664 | 20.04003501 | 17.43593707 | 19.91266458 | 18.11650956 | 21.173789   | 10.61330813 | 20.72473572 | 11.78529826 | 14.24825426 |
| ENSMUSG000000022844 | -0.086288111 | 4.85610013   | 0.132930565 | 0.715412671 | 0.999071534 | Pdia5         | Pdia5         | PDIA5    | 25.05427197 | 31.2458534  | 40.25749176 | 31.01380163 | 26.16102464 | 33.32506998 | 35.01097377 | 24.86968286 | 19.32788915 | 24.05209894 |
| ENSMUSG000000028436 | -0.076664821 | 5.795516538  | 0.132863857 | 0.71548098  | 0.999071534 | Dcaf12        | Dcaf12        | DCAF12   | 52.00340485 | 63.26247738 | 55.87578288 | 60.08490427 | 63.83290012 | 59.59221029 | 54.6197077  | 64.73025789 | 41.95566182 | 39.86896835 |
| ENSMUSG000000017264 | -0.075440311 | 5.855209392  | 0.132825778 | 0.71551998  | 0.999071534 | Exosc10       | Exosc10       | EXOSC10  | 53.96844579 | 59.29004441 | 61.53068139 | 59.3217011  | 73.64328436 | 73.34425881 | 41.80607959 | 51.25917968 | 49.96966464 | 56.5355043  |
| ENSMUSG000000036466 | 0.24002504   | 0.611633785  | 0.132784744 | 0.715562016 | 0.999071534 | Megf11        | Megf11        | MEGF11   | 1.122880537 | 1.245090933 | 1.750325729 | 2.081463196 | 0.39241537  | 0.582097292 | 0.776583522 | 1.4507315   | 1.964216377 | 2.222204793 |
| ENSMUSG000000029198 | 0.096390528  | 6.467369268  | 0.132746485 | 0.715601214 | 0.999071534 | Grpel1        | Grpel1        | GRPEL1   | 109.5510324 | 80.39730022 | 77.68753427 | 82.6340889  | 93.91807845 | 78.36484796 | 159.5231984 | 71.08584351 | 58.29794208 | 75.03209125 |
| ENSMUSG000000014303 | 0.076226451  | 5.670926801  | 0.132531096 | 0.715822012 | 0.999071534 | Gli2          | Gli2          | GLI2     | 50.45944412 | 48.02493597 | 44.90258697 | 51.06523042 | 62.59025145 | 69.34233993 | 41.61193371 | 55.88770399 | 33.86309035 | 55.4244019  |
| ENSMUSG000000031880 | -0.119812159 | 3.946104068  | 0.132509278 | 0.71584439  | 0.999071534 | Rrad          | Rrad          | RRAD     | 18.10644865 | 15.47470159 | 13.59868451 | 13.46012867 | 22.36767607 | 27.14028625 | 19.15572687 | 12.50392388 | 8.092571475 | 6.928050238 |

|                    |              |             |             |             |             |               |               |              |             |             |             |             |             |             |             |             |             |             |
|--------------------|--------------|-------------|-------------|-------------|-------------|---------------|---------------|--------------|-------------|-------------|-------------|-------------|-------------|-------------|-------------|-------------|-------------|-------------|
| ENSMUSG00000028419 | -0.086682393 | 6.999857417 | 0.132463756 | 0.715891085 | 0.999071534 | Chmp5         | Chmp5         | CHMP5        | 138.4652062 | 138.3829636 | 120.1665933 | 152.8487807 | 132.3093821 | 116.3466963 | 162.3706713 | 118.7527357 | 81.39712668 | 121.9598278 |
| ENSMUSG00000072235 | 0.134006928  | 9.499679805 | 0.132423087 | 0.715932811 | 0.999071534 | Tuba1a        | Tuba1a        | TUBA1A       | 1112.142992 | 722.6863513 | 528.5310499 | 500.8000451 | 744.0849433 | 1093.979098 | 1494.405557 | 403.2342746 | 355.9160076 | 445.8134969 |
| ENSMUSG00000028669 | -0.098592758 | 4.458334013 | 0.132400763 | 0.715955718 | 0.999071534 | Pithd1        | Pithd1        | PITHD1       | 31.58101509 | 16.71979252 | 23.02351536 | 24.56126572 | 21.38663764 | 32.5246862  | 25.10953387 | 13.0565835  | 13.8280833  | 20.261279   |
| ENSMUSG00000021322 | -0.183106862 | 1.789712046 | 0.13213039  | 0.716233324 | 0.999071534 | Aoah          | Aoah          | AOAH         | 6.456563086 | 2.96450222  | 2.356207712 | 3.607869541 | 3.008517833 | 6.985167506 | 2.394465859 | 2.003391119 | 2.828471584 | 1.437897219 |
| ENSMUSG00000079557 | -0.083506559 | 4.773035274 | 0.132103209 | 0.716261249 | 0.999071534 | 2-Mar         | 2-Mar         | 2-Mar        | 31.72137516 | 31.42372354 | 29.35161607 | 22.61856673 | 30.73920395 | 37.10870238 | 29.44545853 | 18.79042705 | 20.11357571 | 24.3135348  |
| ENSMUSG00000072915 | 0.16281848   | 2.122442571 | 0.132088424 | 0.716276441 | 0.999071534 |               |               |              | 4.842422314 | 3.794562842 | 6.193460271 | 2.289609516 | 3.662543449 | 3.128772945 | 2.78275762  | 6.63191543  | 3.535589479 | 5.097999231 |
| ENSMUSG00000031994 | 0.22806745   | 1.159457932 | 0.131999099 | 0.716368243 | 0.999071534 | Adamts8       | Adamts8       | ADAMTS8      | 2.035220973 | 0.830060622 | 3.231370576 | 1.873316877 | 2.027479409 | 5.893735083 | 2.523896446 | 1.174401691 | 0.235705965 | 2.091486864 |
| ENSMUSG00000031314 | -0.079381324 | 6.129107977 | 0.131900545 | 0.716469571 | 0.999071534 | Taf1          | Taf1          | TAF1         | 59.37230838 | 85.8519843  | 59.2417939  | 69.65963498 | 99.21568594 | 86.8052587  | 60.37936882 | 67.21722618 | 49.10540944 | 68.4961948  |
| ENSMUSG00000025232 | -0.118326444 | 7.30878397  | 0.131874668 | 0.716496183 | 0.999071534 | Hexa          | Hexa          | RP11-106M3.2 | 218.1897243 | 233.8399351 | 111.9535264 | 142.1639363 | 153.3036044 | 188.0901875 | 269.2156209 | 131.5329894 | 61.51925694 | 105.031856  |
| ENSMUSG00000029454 | 0.074479596  | 5.086283521 | 0.131818736 | 0.716553715 | 0.999071534 | Mapkapk5      | Mapkapk5      | MAPKAPK5     | 31.51083506 | 34.32893571 | 35.27579546 | 35.03796381 | 34.79416277 | 40.31023748 | 34.6873973  | 33.15957715 | 24.98483232 | 35.81671255 |
| ENSMUSG00000054752 | 0.138564828  | 3.041544845 | 0.131708873 | 0.71666676  | 0.999071534 | Fsd1l         | Fsd1l         | FSD1L        | 6.807463254 | 9.486407105 | 8.953589305 | 7.493267507 | 7.259684337 | 6.548594537 | 6.730390522 | 15.33630443 | 6.049786443 | 5.816947841 |
| ENSMUSG00000038500 | 0.125356825  | 3.830757644 | 0.131571459 | 0.716808229 | 0.999071534 | Prr3          | Prr3          | PRR3         | 10.6673651  | 11.14652835 | 17.03201575 | 18.80255087 | 11.77246109 | 18.3360647  | 7.701119924 | 11.05319238 | 19.87786974 | 12.67963911 |
| ENSMUSG00000037149 | -0.110124869 | 6.714662307 | 0.131562103 | 0.716817863 | 0.999071534 | Ddx1          | Ddx1          | DDX1         | 140.5004272 | 141.8810763 | 105.7600662 | 74.93267507 | 105.5597344 | 180.0863498 | 151.3043562 | 67.7698858  | 41.87709317 | 71.11055338 |
| ENSMUSG00000031990 | 0.247106675  | 1.355293199 | 0.131545782 | 0.716834673 | 0.999071534 | Jam3          | Jam3          | JAM3         | 3.649361744 | 1.660121243 | 2.894769475 | 2.775284262 | 0.457817931 | 3.419821592 | 6.989251696 | 0.621742072 | 1.335667137 | 0.71894861  |
| ENSMUSG00000032311 | -0.353227856 | -0.75800275 | 0.131489854 | 0.716892281 | 0.999071534 | Nrg4          | Nrg4          | NRG4         | 0.350900168 | 0.118580089 | 0.336601102 | 1.110113705 | 0.719428178 | 0.291048646 | 0.064715293 | 1.174401691 | 0.078568655 | 0.326794823 |
| ENSMUSG00000028060 | 0.093419931  | 6.18551675  | 0.13146235  | 0.716920617 | 0.999071534 | 2810403A07Rik | 2810403A07Rik | KIAA0907     | 66.24995166 | 56.97773268 | 95.72935333 | 72.0880087  | 73.25086899 | 69.56062642 | 42.19437135 | 88.77095133 | 70.161809   | 86.20847418 |
| ENSMUSG00000061167 | -0.297942265 | 8.415276979 | 0.131406617 | 0.716978046 | 0.999071534 | Rpl15-ps3     | Rpl15-ps3     |              | 497.6466178 | 428.7856012 | 135.3279121 | 310.9012194 | 409.8778535 | 323.0639972 | 623.4671374 | 346.2412514 | 0           | 248.560142  |
| ENSMUSG00000038733 | 0.088955827  | 7.129907657 | 0.131401416 | 0.716983406 | 0.999071534 | Wdr26         | Wdr26         | WDR26        | 125.4117199 | 171.7039686 | 115.4541779 | 132.7279698 | 159.5822503 | 159.4946581 | 103.9974766 | 173.8114502 | 117.0672961 | 141.3714402 |
| ENSMUSG00000026260 | 0.082307657  | 6.424587767 | 0.131397011 | 0.716987945 | 0.999071534 | Ndufa10       | Ndufa10       | NDUFA10      | 69.40805317 | 65.45620903 | 101.3169316 | 89.91921009 | 105.7559421 | 85.2772533  | 83.48272859 | 93.60672299 | 74.09024176 | 86.7313459  |
| ENSMUSG00000026889 | 0.082822847  | 5.299111002 | 0.131359717 | 0.717026383 | 0.999071534 | Rbm18         | Rbm18         | RBM18        | 45.54684177 | 46.24623464 | 36.55487965 | 34.34414274 | 35.51359095 | 35.72622131 | 52.93711007 | 37.30452429 | 35.19875748 | 31.89517468 |
| ENSMUSG00000029759 | 0.088022898  | 5.94785706  | 0.131178587 | 0.717213156 | 0.999071534 | Pon3          | Pon3          | PON3         | 62.10932968 | 79.86368982 | 43.690823   | 66.53744018 | 57.48885164 | 66.06804266 | 89.04824383 | 60.58531075 | 48.08401692 | 43.39835243 |
| ENSMUSG00000025134 | 0.139767483  | 5.9873113   | 0.130919422 | 0.717480649 | 0.999071534 | Alyref        | Alyref        | ALYREF       | 87.79522196 | 61.95809641 | 54.32741782 | 47.38797877 | 62.85186169 | 129.6621718 | 127.0361211 | 27.14940379 | 18.62077126 | 39.60753249 |
| ENSMUSG00000021585 | -0.094466872 | 6.906272314 | 0.130900364 | 0.717500331 | 0.999071534 | Cast          | Cast          | CAST         | 99.7960077  | 145.6756391 | 138.0064517 | 99.77146922 | 161.2173143 | 132.0633232 | 72.80470516 | 162.481928  | 81.47569534 | 113.2017265 |
| ENSMUSG00000032899 | 0.123201556  | 3.480559653 | 0.13088868  | 0.717512399 | 0.999071534 | Styk1         | Styk1         | STYK1        | 9.895384729 | 9.723567283 | 16.42613376 | 5.61995063  | 13.47292769 | 10.4049891  | 11.32517636 | 9.671543335 | 12.02100423 | 11.17638293 |
| ENSMUSG00000030801 | 0.098257012  | 4.086124231 | 0.130831982 | 0.717570967 | 0.999071534 | Kat8          | Kat8          | KAT8         | 20.00130956 | 20.39577528 | 12.72352164 | 16.9986161  | 14.38856355 | 14.77071879 | 19.93231039 | 17.68510781 | 12.72812213 | 18.62730488 |
| ENSMUSG00000069682 | 0.103844238  | 10.24213437 | 0.130824856 | 0.717578328 | 0.999071534 | Gm10275       | Gm10275       |              | 1567.120149 | 1023.583327 | 1164.235891 | 1295.225165 | 1001.313218 | 872.8548896 | 1667.777828 | 1209.150164 | 1060.833981 | 1150.317775 |
| ENSMUSG00000079671 | 0.203676508  | 1.646413501 | 0.130824253 | 0.717578951 | 0.999071534 | 2610203C22Rik | 2610203C22Rik |              | 2.456301174 | 1.304380977 | 1.144443746 | 5.897479057 | 3.466335765 | 4.147443207 | 5.241938772 | 1.243484143 | 2.592765618 | 2.483640651 |
| ENSMUSG00000098559 | -0.267170077 | 0.016249575 | 0.130709234 | 0.717697812 | 0.999071534 | Gm15013       | Gm15013       |              | 1.122880537 | 1.600831199 | 0.269280881 | 0.971349492 | 0.981038424 | 1.236956746 | 0.776583522 | 1.036236786 | 0.078568655 | 0.849666539 |
| ENSMUSG00000029406 | 0.118017126  | 3.434528955 | 0.130654405 | 0.717754492 | 0.999071534 | Pitpnm2       | Pitpnm2       | PITPNM2      | 10.94808523 | 9.427117061 | 10.70391503 | 8.325852786 | 13.99614818 | 17.53568093 | 7.44225875  | 9.049801264 | 6.678335683 | 14.57504908 |
| ENSMUSG00000086583 | 0.120370099  | 10.57071175 | 0.130646285 | 0.717762887 | 0.999071534 | Gm15500       | Gm15500       |              | 2104.488666 | 1863.011175 | 1047.098707 | 1327.279698 | 1246.572824 | 1323.543718 | 3010.943744 | 1171.362063 | 918.93899   | 1271.624013 |
| ENSMUSG00000045427 | 0.087585991  | 6.953775401 | 0.130532299 | 0.71788077  | 0.999071534 | Hnrrnph2      | Hnrrnph2      | HNRNPH2      | 85.61964092 | 128.5408163 | 133.7652778 | 112.3296305 | 163.7680142 | 136.3562907 | 104.5799143 | 126.1445581 | 121.9385527 | 121.9598278 |
| ENSMUSG00000029104 | 0.084708703  | 5.092329529 | 0.130417224 | 0.717999839 | 0.999071534 | Htt           | Htt           | HTT          | 34.24785637 | 39.90219989 | 34.93919436 | 22.2716562  | 40.876601   | 54.2805725  | 26.08026327 | 34.95572091 | 25.3776756  | 31.96053364 |
| ENSMUSG00000030590 | -0.116900525 | 3.26241928  | 0.130396106 | 0.718021696 | 0.999071534 | Fam98c        | Fam98c        | FAM98C       | 12.00078574 | 11.44297857 | 9.155549966 | 7.146356975 | 11.64165596 | 10.84156207 | 6.536244641 | 8.842553906 | 6.442629718 | 11.56853672 |
| ENSMUSG00000020377 | -0.21218722  | 1.802959839 | 0.130378794 | 0.718039616 | 0.999071534 | Ltc4s         | Ltc4s         | LTC4S        | 1.684320805 | 0.711480533 | 6.328100712 | 6.105625376 | 3.597140888 | 5.74821076  | 4.594785837 | 2.141556024 | 1.414235792 | 1.830051006 |
| ENSMUSG00000044145 | -0.188474802 | 1.279266512 | 0.130324573 | 0.718095747 | 0.999071534 | 1810024803Rik | 1810024803Rik |              | 2.17558104  | 0.948640711 | 3.366011017 | 3.677251647 | 2.419894779 | 1.964578361 | 2.718042326 | 2.348803381 | 1.807079067 | 1.437897219 |
| ENSMUSG00000032745 | -0.084824417 | 6.607719271 | 0.130321315 | 0.718099121 | 0.999071534 | Gbppl         | Gbppl         | GPBP1        | 111.0949931 | 117.1571277 | 92.22870187 | 90.75179537 | 110.5303291 | 112.7813504 | 132.4074905 | 90.91250735 | 49.26254675 | 80.39152634 |
| ENSMUSG00000035000 | 0.320234264  | 0.14870775  | 0.130307971 | 0.718112937 | 0.999071534 | Dpp4          | Dpp4          | DPP4         | 1.263240604 | 1.067220799 | 1.144443746 | 0           | 1.046440986 | 1.164194584 | 1.812028217 | 0.967154334 | 0           | 1.437897219 |
| ENSMUSG00000032086 | 0.075610515  | 5.425806902 | 0.130048986 | 0.718381254 | 0.999071534 | Bace1         | Bace1         | BACE1        | 43.16072063 | 45.17901384 | 33.39082929 | 47.73488931 | 46.89363666 | 53.3346644  | 43.35924663 | 39.23883296 | 37.7915231  | 39.34609663 |
| ENSMUSG00000025571 | 0.111651961  | 5.197087809 | 0.130041927 | 0.718388571 | 0.999071534 | Tnrc6c        | Tnrc6c        | TNRC6C       | 28.00183338 | 26.62122994 | 49.34572151 | 42.04555657 | 35.44818839 | 38.63670777 | 15.01394809 | 36.54461732 | 45.96266323 | 42.81012175 |

|                     |              |              |             |             |             |               |               |         |             |             |             |             |             |             |              |             |             |             |
|---------------------|--------------|--------------|-------------|-------------|-------------|---------------|---------------|---------|-------------|-------------|-------------|-------------|-------------|-------------|--------------|-------------|-------------|-------------|
| ENSMUSG00000025794  | 0.111310045  | 10.62764438  | 0.130000164 | 0.718431869 | 0.999071534 | Rpl14         | Rpl14         | RPL14   | 1585.296778 | 1052.516868 | 1877.762906 | 1998.967872 | 1331.203739 | 1025.218856 | 1494.470272  | 1776.109851 | 1710.282484 | 1683.581567 |
| ENSMUSG00000025782  | 0.127601682  | 4.918322388  | 0.129999252 | 0.718432815 | 0.999071534 | Taf3          | Taf3          | TAF3    | 19.58022936 | 18.37991377 | 46.18167115 | 39.2008902  | 24.65676572 | 28.52276732 | 13.46078104  | 26.32041436 | 43.99844685 | 33.92130258 |
| ENSMUSG00000025932  | 0.127434538  | 3.786926203  | 0.129959825 | 0.718473697 | 0.999071534 | Eya1          | Eya1          | EYA1    | 12.07096577 | 14.40748079 | 7.068623136 | 17.69243717 | 16.3506404  | 11.64194584 | 8.283557565  | 22.79720929 | 10.8424744  | 14.50969012 |
| ENSMUSG00000024218  | -0.113211198 | 4.557012569  | 0.129957141 | 0.718476481 | 0.999071534 | Taf11         | Taf11         |         | 26.59823271 | 24.48678834 | 23.15815558 | 23.24300569 | 29.03873735 | 31.28772945 | 40.57648901  | 16.02712896 | 8.406846095 | 16.33974113 |
| ENSMUSG000000081999 | 0.477029333  | 5.970944659  | 0.129942971 | 0.718491176 | 0.999071534 | Gm13461       | Gm13461       |         | 113.9021944 | 110.0423224 | 3.164050356 | 0           | 50.55618011 | 131.553988  | 245.5945388  | 3.039627905 | 0           | 0.326794823 |
| ENSMUSG000000036186 | -0.191571293 | 1.517067524  | 0.129889635 | 0.718546496 | 0.999071534 | Fam69b        | Fam69b        | FAM69B  | 5.333682549 | 3.201662398 | 1.817645949 | 2.150845303 | 2.681505025 | 2.837724299 | 3.494625848  | 3.45412262  | 0.471411931 | 2.352922722 |
| ENSMUSG000000041396 | 0.191232764  | 1.431485954  | 0.129701313 | 0.718741929 | 0.999071534 | Mettl18       | Mettl18       | METTL18 | 2.666841275 | 1.363671021 | 1.413724627 | 3.885397967 | 3.008517833 | 4.29296753  | 3.624056435  | 2.210638477 | 0.707117896 | 2.941153403 |
| ENSMUSG000000036442 | -0.078661823 | 5.247718919  | 0.12968816  | 0.718755585 | 0.999071534 | Thap11        | Thap11        | THAP11  | 43.44144076 | 35.63331669 | 36.01631788 | 41.83741025 | 44.99696238 | 40.74681045 | 37.211129375 | 35.37021563 | 21.5278115  | 45.22840344 |
| ENSMUSG000000017607 | 0.174773717  | 1.45617966   | 0.129611395 | 0.718835299 | 0.999071534 | Tns4          | Tns4          | TNS4    | 4.280982046 | 2.96450222  | 2.086926831 | 1.110113705 | 2.419894779 | 3.419821592 | 2.394465859  | 2.417885834 | 2.828471584 | 2.287563758 |
| ENSMUSG000000089704 | -0.110884543 | 6.670853284  | 0.129517541 | 0.718932794 | 0.999071534 | Galnt2        | Galnt2        | GALNT2  | 78.74199763 | 78.20356857 | 150.5953329 | 161.3827798 | 73.12006386 | 80.69323713 | 61.99725115  | 110.1865116 | 100.9607218 | 107.7115735 |
| ENSMUSG000000055660 | 0.190860005  | 2.390061065  | 0.129516874 | 0.718933487 | 0.999071534 | Mettl4        | Mettl4        | METTL4  | 6.667103186 | 9.842147372 | 1.009803305 | 2.983430582 | 4.447374189 | 8.876983706 | 8.9307105    | 2.694215643 | 2.828471584 | 3.986896835 |
| ENSMUSG000000047022 | 0.135628004  | 2.396062284  | 0.129499325 | 0.718951721 | 0.999071534 | Mipol1        | Mipol1        | MIPO11  | 5.123142449 | 6.877645151 | 4.308494102 | 3.677251647 | 5.493815174 | 6.184783729 | 5.500799946  | 5.733843549 | 4.399844685 | 4.182973728 |
| ENSMUSG000000056592 | 0.17112291   | 1.66751197   | 0.129431162 | 0.71902256  | 0.999071534 | Zfp658        | Zfp658        | ZNF175  | 1.684320805 | 4.565333419 | 4.039213221 | 1.665170557 | 2.943115272 | 4.80230266  | 2.265035272  | 2.694215643 | 2.435628308 | 3.660102012 |
| ENSMUSG000000032238 | -0.188561423 | 2.317834326  | 0.129396692 | 0.719058391 | 0.999071534 | Rora          | Rora          | RORA    | 5.052962415 | 9.901437416 | 5.385617627 | 3.538487434 | 3.008517833 | 3.710870238 | 1.423736457  | 10.1551205  | 2.199922343 | 4.313691657 |
| ENSMUSG000000039047 | -0.080681112 | 5.711588104  | 0.129277135 | 0.719182711 | 0.999071534 | Pigk          | Pigk          | PIGK    | 58.10906777 | 58.22282361 | 56.34702443 | 60.84810744 | 44.66994957 | 72.90768585 | 58.43791001  | 31.22526848 | 40.54142603 | 46.47022376 |
| ENSMUSG000000078931 | 0.293551157  | 3.092541927  | 0.129273483 | 0.719186509 | 0.999071534 | Pdf           | Pdf           | PDF     | 13.47456644 | 5.51397413  | 8.145746661 | 4.440454819 | 7.848307392 | 21.90141062 | 22.90921389  | 3.108710358 | 0.864255206 | 0           |
| ENSMUSG000000026111 | 0.084892594  | 5.527028836  | 0.129262383 | 0.719198055 | 0.999071534 | Unc50         | Unc50         | UNC50   | 49.54710368 | 40.3172302  | 49.34572151 | 44.19640187 | 48.33249302 | 38.92775641 | 70.86324636  | 41.38038898 | 37.00583655 | 38.82322492 |
| ENSMUSG000000047911 | 0.240195341  | 0.297886929  | 0.129222153 | 0.719239905 | 0.999071534 | Npm2          | Npm2          | NPM2    | 0.561440268 | 0.5336104   | 1.817645949 | 1.110113705 | 1.177246109 | 1.382481069 | 0.388291761  | 1.243484143 | 0.864255206 | 1.895409971 |
| ENSMUSG000000090215 | -0.332756919 | -0.032076864 | 0.129190583 | 0.719272751 | 0.999071534 | Trim34b       | Trim34b       | TRIM34  | 1.473780704 | 0.948640711 | 0.134640441 | 0.763203172 | 1.63506404  | 1.600767553 | 0.388291761  | 0.207247357 | 1.414235792 | 0           |
| ENSMUSG000000055323 | 0.265435395  | 0.322367755  | 0.129017723 | 0.719452679 | 0.999071534 | Gm9967        | Gm9967        |         | 1.824680872 | 0.770770577 | 1.144443746 | 0.971349492 | 0.588623054 | 0.363810808 | 0.19414588   | 1.796143762 | 1.178529826 | 2.156845829 |
| ENSMUSG000000078881 | 0.289432953  | 2.162954558  | 0.128942435 | 0.719531089 | 0.999071534 | Gm14434       | Gm14434       | ZNF788  | 6.035482885 | 0.415030311 | 0           | 9.991023343 | 3.466335765 | 2.255627007 | 8.089411685  | 3.315957715 | 2.671334273 | 6.601255415 |
| ENSMUSG000000021701 | 0.102477482  | 7.185810299  | 0.128936197 | 0.719537586 | 0.999071534 | Plk2          | Plk2          | PLK2    | 125.2011798 | 195.6571465 | 155.6443494 | 97.75938813 | 157.4893683 | 139.9216366 | 102.767886   | 233.9131838 | 117.6172767 | 126.6003142 |
| ENSMUSG000000028480 | -0.079562815 | 5.531667038  | 0.128857287 | 0.719619797 | 0.999071534 | Glipr2        | Glipr2        | GLIPR2  | 47.37152264 | 52.94600966 | 65.23329351 | 38.43768703 | 42.38085991 | 52.89809143 | 47.43631012  | 46.83790272 | 36.9272679  | 33.136995   |
| ENSMUSG000000015733 | 0.124895862  | 8.068372883  | 0.12869194  | 0.719792154 | 0.999071534 | Capza2        | Capza2        | CAPZA2  | 360.7253724 | 373.4679897 | 184.4574037 | 195.9350689 | 225.1810196 | 376.8352345 | 518.1753549  | 161.860186  | 152.2660536 | 181.5018444 |
| ENSMUSG000000025786 | -0.077888    | 5.937886335  | 0.128638784 | 0.719847591 | 0.999071534 | Zdhc3         | Zdhc3         | ZDHH3   | 68.28517264 | 65.45620903 | 66.31041704 | 63.97030224 | 62.00162839 | 99.90244777 | 51.77223478  | 49.11762365 | 47.14119306 | 46.66630066 |
| ENSMUSG000000024027 | -0.38972405  | 1.281228499  | 0.128583926 | 0.719904815 | 0.999071534 | Glp1r         | Glp1r         | GLP1R   | 3.719541778 | 5.929004441 | 0           | 2.01208109  | 1.831271725 | 4.220205368 | 5.565515239  | 0           | 0           | 0.588230681 |
| ENSMUSG000000038260 | -0.122958622 | 2.80062857   | 0.128490893 | 0.720001892 | 0.999071534 | Trpm4         | Trpm4         | TRPM4   | 8.140883891 | 8.004155995 | 6.126140051 | 7.146356975 | 7.586697145 | 6.69411886  | 5.565515239  | 7.391822406 | 5.735511822 | 6.013024734 |
| ENSMUSG000000013822 | 0.084037118  | 5.893490398  | 0.128469223 | 0.720024511 | 0.999071534 | Elof1         | Elof1         | ELOF1   | 73.68903522 | 43.28173242 | 52.03853032 | 73.82256137 | 55.0035543  | 52.09770765 | 75.52274749  | 54.50605494 | 48.86970347 | 61.63350353 |
| ENSMUSG000000027433 | 0.085373071  | 6.163339713  | 0.128454865 | 0.720039498 | 0.999071534 | Xrn2          | Xrn2          | XRN2    | 66.39031173 | 102.6903569 | 62.47316448 | 52.52225466 | 77.95985342 | 109.2160044 | 75.3933169   | 74.12547142 | 55.07662722 | 48.56171063 |
| ENSMUSG000000087213 | 0.141470193  | 3.432863619  | 0.128443738 | 0.720051113 | 0.999071534 | 2810408111Rik | 2810408111Rik |         | 5.75476275  | 4.624623464 | 17.50325729 | 14.08456763 | 10.20279961 | 9.386318836 | 14.04321869  | 8.911636359 | 8.32827744  | 13.13715187 |
| ENSMUSG000000024454 | 0.075775607  | 6.448137594  | 0.128427525 | 0.720068039 | 0.999071534 | Hdac3         | Hdac3         | HDAC3   | 93.05872448 | 72.096694   | 94.11366804 | 93.52707963 | 87.18161461 | 106.6693288 | 87.75393796  | 78.33950101 | 62.54064946 | 101.4371129 |
| ENSMUSG000000021051 | -0.085145837 | 5.133677485  | 0.128401781 | 0.720094916 | 0.999071534 | Ppp2r5e       | Ppp2r5e       | PPP2R5E | 35.09001677 | 49.74434726 | 32.1117451  | 29.6261595  | 40.94200356 | 47.36816715 | 31.90463969  | 27.97839322 | 33.78452169 | 23.52922722 |
| ENSMUSG000000029090 | 0.082420247  | 4.790867095  | 0.128202437 | 0.720303143 | 0.999071534 | Gpr125        | Adgra3        | ADGRA3  | 31.01957483 | 26.26548967 | 31.70782378 | 20.67586775 | 29.82356809 | 38.49118345 | 32.48707733  | 23.28078646 | 18.14935933 | 27.2546882  |
| ENSMUSG000000031533 | 0.098449949  | 4.067285623  | 0.128166502 | 0.720340698 | 0.999071534 | Mrps31        | Mrps31        | MRPS31  | 14.66762701 | 16.24547217 | 13.53136429 | 22.41042042 | 16.02362759 | 17.9722539  | 19.8675951   | 15.88896405 | 15.71373102 | 13.13715187 |
| ENSMUSG000000037031 | 0.120284757  | 3.432198928  | 0.128162039 | 0.720345363 | 0.999071534 | Tspan15       | Tspan15       | TSPAN15 | 9.544484562 | 6.936935196 | 10.56927459 | 12.55816129 | 13.27672    | 12.87890259 | 10.74273872  | 12.29667653 | 11.07818037 | 6.274460592 |
| ENSMUSG000000024063 | -0.115377192 | 6.10994576   | 0.128088632 | 0.7204221   | 0.999071534 | Lbh           | Lbh           | LBH     | 76.9874968  | 86.74133497 | 81.92870816 | 58.90540846 | 68.54188455 | 156.9479824 | 72.22226752  | 40.55139956 | 21.13496822 | 53.79042779 |
| ENSMUSG000000011179 | 0.142768179  | 8.44688894   | 0.128003121 | 0.720511522 | 0.999071534 | Odc1          | Odc1          | ODC1    | 604.600989  | 388.6462411 | 205.5286327 | 230.7648864 | 305.5607678 | 535.5295088 | 736.7836163  | 152.1195602 | 192.3360677 | 214.3774036 |
| ENSMUSG000000026414 | 0.193996234  | 1.744955046  | 0.127998933 | 0.720515903 | 0.999071534 | Tnnt2         | Tnnt2         | TNNT2   | 2.035220973 | 3.260952442 | 7.539864678 | 0.901967385 | 1.896674286 | 3.856394561 | 2.847472913  | 3.108710358 | 2.278490998 | 4.64048648  |
| ENSMUSG000000032558 | 0.157010977  | 2.455349263  | 0.127949837 | 0.720567261 | 0.999071534 | Nphp3         | Nphp3         | NPHP3   | 3.158101509 | 5.691844263 | 5.520258068 | 5.61995063  | 6.213243352 | 5.384399953 | 3.429910554  | 10.98410993 | 2.828471584 | 4.705845444 |

|                      |              |              |             |             |             |               |               |         |             |             |             |             |             |             |             |             |             |             |
|----------------------|--------------|--------------|-------------|-------------|-------------|---------------|---------------|---------|-------------|-------------|-------------|-------------|-------------|-------------|-------------|-------------|-------------|-------------|
| ENSMUSG00000026069   | 0.10299052   | 11.77163725  | 0.127932859 | 0.720585023 | 0.999071534 | ILlr1         | ILlr1         | IL1RL1  | 3987.348786 | 4116.982104 | 2626.296436 | 2929.381921 | 3910.680768 | 2676.992685 | 5106.877954 | 3987.853647 | 2513.018433 | 3074.551049 |
| ENSMUSG000000087440  | -0.24102587  | 0.837492533  | 0.12788844  | 0.720631502 | 0.999071534 | 4930577N17Rik | 4930577N17Rik |         | 0.561440268 | 0.770770577 | 2.760129034 | 4.093544286 | 0.915635862 | 1.382481069 | 0.711868228 | 2.832380548 | 1.099961171 | 1.241820326 |
| ENSMUSG000000085255  | 0.301777057  | -0.354854433 | 0.127858153 | 0.720663199 | 0.999071534 | 5330430P22Rik | Taco1os       |         | 0.631620302 | 0.296450222 | 1.211763966 | 0.555056852 | 0.327012808 | 0.218286485 | 0.129430587 | 1.105319238 | 0.549980586 | 1.372538255 |
| ENSMUSG000000019710  | 0.088965446  | 6.326427909  | 0.127825299 | 0.720697586 | 0.999071534 | Mrpl24        | Mrpl24        | MRPL24  | 86.67234142 | 71.50379355 | 71.69603466 | 101.9223145 | 69.26131273 | 58.79182651 | 86.07134033 | 69.28969975 | 85.63983046 | 89.08426862 |
| ENSMUSG000000037926  | -0.088970244 | 5.50709228   | 0.127824242 | 0.720698692 | 0.999071534 | Ssh2          | Ssh2          | SSH2    | 33.82677617 | 46.30552468 | 57.69342883 | 57.30962001 | 46.23961105 | 66.86842644 | 26.46855503 | 38.40984353 | 39.28432755 | 43.92122415 |
| ENSMUSG000000042035  | 0.105327932  | 5.435733074  | 0.127811792 | 0.720711725 | 0.999071534 | Igsf3         | Igsf3         | IGSF3   | 23.51031124 | 40.55439037 | 48.73983953 | 55.85259577 | 45.65098799 | 38.85499425 | 23.36222095 | 48.01230441 | 46.90548709 | 54.11722261 |
| ENSMUSG000000012848  | -0.099522412 | 10.14694613  | 0.127793622 | 0.720730747 | 0.999071534 | Rps5          | Rps5          | RPS5    | 1637.721263 | 1207.026724 | 972.5752233 | 1235.001497 | 1037.350029 | 1053.232288 | 1580.541613 | 925.4976147 | 763.3730529 | 979.9269548 |
| ENSMUSG000000042572  | -0.073370045 | 6.431343031  | 0.127750808 | 0.720775573 | 0.999071534 | Ube2q1        | Ube2q1        | UBE2Q1  | 93.26926458 | 89.70583719 | 99.76856655 | 76.94475616 | 100.0659192 | 113.2906855 | 82.57671448 | 82.41536571 | 57.98366746 | 76.01247572 |
| ENSMUSG000000052656  | -0.092028194 | 5.006170645  | 0.127592221 | 0.720941686 | 0.999071534 | Rnf103        | Rnf103        | RNF103  | 24.0717515  | 28.28135118 | 41.87317705 | 44.82084083 | 31.06621676 | 35.50793482 | 20.77360921 | 34.47214374 | 29.30610835 | 28.69258542 |
| ENSMUSG000000015002  | 0.082867661  | 7.189344462  | 0.127561317 | 0.720974071 | 0.999071534 | Efr3a         | Efr3a         | EFR3A   | 134.1842241 | 151.3081933 | 153.8940237 | 139.7355626 | 156.1813171 | 161.6047607 | 127.4244129 | 163.4490824 | 135.0595181 | 132.613339  |
| ENSMUSG000000036863  | 0.318447635  | 0.481732715  | 0.12752562  | 0.721011484 | 0.999071534 | Syde2         | Syde2         | SYDE2   | 0.842160403 | 1.719411288 | 1.817645949 | 0           | 1.504258917 | 2.910486461 | 1.747312924 | 1.4507315   | 0.942823861 | 0           |
| ENSMUSG000000027291  | 0.104178458  | 4.153796269  | 0.127516789 | 0.72102074  | 0.999071534 | Vps39         | Vps39         | VPS39   | 22.1768906  | 26.26548967 | 10.77123525 | 11.79495811 | 17.98570444 | 18.26330254 | 19.09101158 | 20.93198308 | 13.74951464 | 16.27438216 |
| ENSMUSG000000005907  | 0.128234318  | 3.212506277  | 0.127411402 | 0.72113123  | 0.999071534 | Pex1          | Pex1          | PEX1    | 6.807463254 | 10.73149804 | 8.616988204 | 9.64411281  | 9.41796887  | 8.367648575 | 4.724216424 | 12.02034672 | 9.506807267 | 10.58815225 |
| ENSMUSG000000001555  | -0.086865701 | 6.149705196  | 0.127382208 | 0.721161847 | 0.999071534 | Fkbp10        | Fkbp10        | FKBP10  | 90.3918832  | 87.92713586 | 80.64962397 | 63.34586328 | 57.29264396 | 116.1284098 | 80.24696391 | 54.16064268 | 43.99844685 | 48.69242856 |
| ENSMUSG000000025428  | -0.098807466 | 8.895014599  | 0.12735279  | 0.721192703 | 0.999071534 | Atp5a1        | Atp5a1        | ATP5A1  | 605.0220692 | 540.5473349 | 434.148101  | 484.2177216 | 494.5087682 | 712.2687991 | 602.1758058 | 302.3048117 | 295.8895551 | 373.4611232 |
| ENSMUSG000000005506  | 0.073346125  | 6.228924444  | 0.127339407 | 0.721206741 | 0.999071534 | Celf1         | Celf1         | CELF1   | 82.67207951 | 79.15220928 | 74.38884348 | 64.31721277 | 79.20250209 | 109.1432423 | 76.88176865 | 63.14136149 | 62.54064946 | 64.31322107 |
| ENSMUSG000000053310  | -0.291403688 | -0.011459247 | 0.1272925   | 0.721255953 | 0.999071534 | Nrgn          | Nrgn          | NRGN    | 0.561440268 | 1.956571465 | 1.077123525 | 0.832585279 | 0.457817931 | 1.091432423 | 0.841298815 | 0.828989429 | 0.942823861 | 0           |
| ENSMUSG0000000039100 | -0.076571846 | 6.41902516   | 0.127279068 | 0.721270046 | 0.999071534 | 6-Mar         | 6-Mar         | 6-Mar   | 76.49623656 | 105.0619587 | 82.19798904 | 91.93129118 | 99.34649106 | 97.71958292 | 86.84792385 | 77.16509932 | 74.87592831 | 64.83609279 |
| ENSMUSG000000000378  | 0.070975845  | 5.583895955  | 0.127233118 | 0.721318265 | 0.999071534 | Ccm2          | Ccm2          | CCM2    | 46.88026241 | 46.0683645  | 53.04833363 | 42.11493868 | 54.48033381 | 64.68556159 | 44.58883721 | 40.55139956 | 40.61999469 | 48.4309927  |
| ENSMUSG000000064302  | -0.094219969 | 4.917695624  | 0.127225486 | 0.721326276 | 0.999071534 | Clasp1        | Clasp1        | CLASP1  | 21.26455016 | 38.59781891 | 32.85226753 | 28.86295632 | 39.89556257 | 40.16471316 | 17.14955277 | 37.64993655 | 21.05639957 | 26.40502166 |
| ENSMUSG000000058587  | 0.077964085  | 6.345448378  | 0.127058594 | 0.721501499 | 0.999071534 | Tmod3         | Tmod3         | TMOD3   | 73.19777498 | 110.1609025 | 78.22609604 | 64.80288752 | 84.89252495 | 106.6693288 | 84.71231916 | 89.80718811 | 59.3193346  | 67.05829758 |
| ENSMUSG000000023963  | 0.152524341  | 2.125972187  | 0.127022461 | 0.721539453 | 0.999071534 | Cyp39a1       | Cyp39a1       | CYP39A1 | 2.947561409 | 4.387463286 | 3.90457278  | 4.371072713 | 5.166802366 | 6.184783729 | 5.500799946 | 5.733843549 | 2.042785033 | 2.61435858  |
| ENSMUSG000000026433  | -0.123121159 | 3.277577217  | 0.126994775 | 0.721568538 | 0.999071534 | Rab71l        | Rab29         | RAB29   | 13.54474647 | 8.241316173 | 7.943786    | 12.55816129 | 9.352566308 | 11.20537287 | 13.26663516 | 5.595678644 | 6.128355098 | 8.692742279 |
| ENSMUSG000000045694  | -0.251201197 | 0.309917506  | 0.126989049 | 0.721574553 | 0.999071534 | Gm4997        | Gm4997        |         | 0.771980369 | 0.237160178 | 1.279084186 | 2.567137942 | 1.308051232 | 0.582097292 | 1.359021163 | 0.759906976 | 1.021392516 | 1.045743432 |
| ENSMUSG000000052889  | -0.133732258 | 2.888387596  | 0.126949407 | 0.721616206 | 0.999071534 | Prkcb         | Prkcb         | PRKCB   | 8.491784059 | 6.581194929 | 7.001302916 | 7.770795933 | 9.679579116 | 10.25946477 | 3.753487022 | 4.835771668 | 8.092571475 | 6.53589645  |
| ENSMUSG000000024542  | 0.081882207  | 4.812328282  | 0.126923962 | 0.721642947 | 0.999071534 | Cep192        | Cep192        | CEP192  | 27.22985301 | 28.45922132 | 25.78364439 | 29.27924896 | 30.21598346 | 46.49502121 | 23.49165153 | 26.87307398 | 21.05639957 | 24.37889376 |
| ENSMUSG000000040621  | 0.104342774  | 3.579821011  | 0.126864382 | 0.721705569 | 0.999071534 | Gemin8        | Gemin8        | GEMIN8  | 13.12366627 | 10.90936817 | 10.16535327 | 13.04383603 | 11.83786365 | 11.56918368 | 11.64875283 | 10.56961522 | 9.899650542 | 15.22863873 |
| ENSMUSG000000005886  | 0.093540323  | 4.722074039  | 0.126664332 | 0.721915959 | 0.999071534 | Ncoa2         | Ncoa2         | NCOA2   | 23.8612114  | 25.43542905 | 25.51436351 | 26.36520049 | 30.67380139 | 29.6869619  | 14.49622574 | 34.5412262  | 26.08479349 | 24.83640651 |
| ENSMUSG000000018733  | -0.143135792 | 2.667336563  | 0.12657085  | 0.722014337 | 0.999071534 | Pex12         | Pex12         | PEX12   | 7.018003354 | 8.537766395 | 2.692808814 | 6.03624327  | 9.744981678 | 6.839643183 | 7.312828163 | 5.319348834 | 3.299883514 | 6.209101628 |
| ENSMUSG000000079111  | 0.095687972  | 8.058641589  | 0.126565068 | 0.722020422 | 0.999071534 | Kdelr2        | Kdelr2        | KDEL2   | 195.7321135 | 250.7375978 | 312.4331426 | 280.9975315 | 294.5077349 | 235.8221655 | 253.7486657 | 318.7464353 | 235.8631026 | 268.6907031 |
| ENSMUSG000000027186  | 0.344430429  | -0.336316701 | 0.126527585 | 0.722059881 | 0.999071534 | Elf5          | Elf5          | ELF5    | 0.350900168 | 0.355740266 | 0.673202203 | 1.387642131 | 0.261610246 | 0.873145938 | 0           | 0.552659619 | 1.807079067 | 0.196076894 |
| ENSMUSG000000097958  | -0.315215432 | 0.137806452  | 0.126495226 | 0.72209395  | 0.999071534 | Gm8492        | Gm8492        |         | 0.561440268 | 2.075151554 | 0.807842644 | 0.416292639 | 1.700466601 | 0.145524323 | 0.517722348 | 1.72706131  | 0           | 1.699333077 |
| ENSMUSG000000032803  | 0.088437672  | 7.851193904  | 0.126430527 | 0.722162085 | 0.999071534 | Cdv3          | Cdv3          | CDV3    | 218.4002644 | 232.4169741 | 248.8155344 | 219.0393104 | 242.8397112 | 341.5455862 | 206.9595085 | 186.7298688 | 216.5352134 | 208.037584  |
| ENSMUSG000000018585  | 0.10925428   | 7.874621371  | 0.12634185  | 0.722255502 | 0.999071534 | Atox1         | Atox1         | ATOX1   | 287.1766973 | 142.1775265 | 232.9952826 | 296.7472697 | 206.6720946 | 153.3826365 | 265.720995  | 200.8226891 | 235.0774161 | 291.9584944 |
| ENSMUSG000000030787  | 0.209782793  | 1.428978154  | 0.126337817 | 0.722259751 | 0.999071534 | Lyve1         | Lyve1         | LYVE1   | 1.965040939 | 2.490181865 | 4.847055865 | 0.832585279 | 2.223687094 | 3.128772945 | 3.559341141 | 3.523205072 | 0.31427462  | 3.137230296 |
| ENSMUSG000000015714  | 0.091573946  | 7.519990545  | 0.126079379 | 0.72253222  | 0.999071534 | Cers2         | Cers2         | CERS2   | 196.2233738 | 197.7322981 | 166.213624  | 140.0824731 | 226.162058  | 204.6071982 | 255.4959787 | 187.0061986 | 134.1166943 | 138.038133  |
| ENSMUSG000000036111  | -0.259530527 | 0.359126491  | 0.125869301 | 0.722753934 | 0.999071534 | Lmo1          | Lmo1          | LMO1    | 1.052700503 | 1.245090933 | 1.346404407 | 1.318260024 | 1.504258917 | 2.037340523 | 1.68259763  | 0           | 0.628549241 | 0.915025503 |
| ENSMUSG000000005533  | 0.131686519  | 6.979517199  | 0.125800049 | 0.722827069 | 0.999071534 | Igf1r         | Igf1r         | IGF1R   | 61.89878958 | 118.2243485 | 155.8463101 | 148.5470901 | 136.5605486 | 82.36676684 | 45.81842778 | 200.960854  | 137.1023031 | 148.1034136 |
| ENSMUSG000000084838  | -0.451905438 | 4.242992873  | 0.125671664 | 0.722962709 | 0.999071534 | Gm10241       | Gm10241       |         | 49.40674361 | 32.78739456 | 0           | 1.110113705 | 31.98185262 | 33.76164295 | 39.86462078 | 9.740625788 | 0           | 0           |

|                     |              |              |             |             |             |               |               |              |             |             |             |             |             |             |             |             |             |             |
|---------------------|--------------|--------------|-------------|-------------|-------------|---------------|---------------|--------------|-------------|-------------|-------------|-------------|-------------|-------------|-------------|-------------|-------------|-------------|
| ENSMUSG00000020696  | -0.133211642 | 2.942501379  | 0.125615933 | 0.723021615 | 0.999071534 | Rffl          | Rffl          | RFFL         | 11.79024564 | 10.13859759 | 6.597381593 | 3.81601586  | 9.090956062 | 10.25946477 | 7.183397576 | 7.529987311 | 3.8498641   | 6.862691273 |
| ENSMUSG00000046962  | 0.126841972  | 3.113272539  | 0.125596845 | 0.723041793 | 0.999071534 | Zbtb21        | Zbtb21        | ZBTB21       | 7.789983723 | 8.656346483 | 7.472544458 | 8.187088573 | 10.20279961 | 6.69411886  | 5.824376413 | 12.22759407 | 9.349669957 | 7.712357812 |
| ENSMUSG000000024101 | 0.081130694  | 5.55115003   | 0.125478393 | 0.723167052 | 0.999071534 | Wash          | Wash1         | FOS38757.1   | 44.1432411  | 45.65333419 | 47.52807556 | 42.73937763 | 56.11539785 | 40.01918884 | 34.23439025 | 52.50266382 | 47.45546768 | 53.33291504 |
| ENSMUSG00000047867  | 0.128539363  | 3.44679139   | 0.125443845 | 0.723203597 | 0.999071534 | Gimap6        | Gimap6        | GIMAP6       | 15.57996745 | 12.21374915 | 11.71371834 | 5.61995063  | 8.698540692 | 18.3360647  | 15.27280926 | 6.493750525 | 5.814080477 | 10.52279329 |
| ENSMUSG00000057858  | 0.083759745  | 4.903774789  | 0.125416975 | 0.723232025 | 0.999071534 | D19Erttd737e  | Fam204a       | FAM204A      | 27.37021308 | 28.044191   | 36.95880097 | 26.22643628 | 31.65483981 | 30.85115649 | 25.95083269 | 25.8368372  | 34.41307093 | 28.43114956 |
| ENSMUSG00000024370  | -0.074873606 | 5.353608684  | 0.125344842 | 0.723308356 | 0.999071534 | Cdc23         | Cdc23         | CD23         | 34.5285765  | 44.76398353 | 47.52807556 | 46.20848296 | 43.49270346 | 48.45959957 | 35.98170317 | 32.95232979 | 30.72034414 | 45.16304447 |
| ENSMUSG00000005204  | 0.081016549  | 5.660545655  | 0.125310892 | 0.72334429  | 0.999071534 | Senp3         | Senp3         | SENP3-EIF4A1 | 58.31960787 | 53.42033001 | 43.75814322 | 41.42111761 | 58.66609775 | 70.94310748 | 72.02812164 | 39.37699786 | 35.35589479 | 37.77748148 |
| ENSMUSG00000041974  | -0.101813592 | 4.877195128  | 0.124733879 | 0.723955871 | 0.999071534 | Spidr         | Spidr         | SPIDR        | 34.45839647 | 49.68050721 | 18.10913927 | 18.80255087 | 37.47566779 | 28.95934029 | 27.43928444 | 35.64654544 | 22.70634132 | 21.04558657 |
| ENSMUSG000000091055 | 0.386072536  | -0.432541534 | 0.124733329 | 0.723956455 | 0.999071534 | Siglec15      | Siglec15      | SIGLEC15     | 1.403600671 | 0.118580089 | 0           | 0.971349492 | 0.196207685 | 1.091432423 | 1.747312924 | 0.207247357 | 0           | 0.457512752 |
| ENSMUSG00000036964  | -0.299481872 | 0.176287764  | 0.124634762 | 0.724061086 | 0.999071534 | Trim17        | Trim17        | TRIM17       | 0.912340436 | 1.304380977 | 0.403921322 | 2.081463196 | 0.981038424 | 0.363810808 | 0.776583522 | 1.519813953 | 1.414235792 | 0           |
| ENSMUSG000000000708 | 0.074062987  | 5.108088941  | 0.124550923 | 0.724150119 | 0.999071534 | Kat2b         | Kat2b         | KAT2B        | 33.40569597 | 37.05627775 | 33.18886863 | 31.15256584 | 39.30693952 | 47.95026444 | 35.14040436 | 31.98517546 | 22.54920401 | 35.94743048 |
| ENSMUSG000000027309 | 0.100780457  | 5.843366565  | 0.124502225 | 0.72420185  | 0.999071534 | 4930402H24Rik | 4930402H24Rik | C20orf194    | 40.07279915 | 70.55515284 | 57.35682773 | 55.29753892 | 63.57128987 | 51.66113468 | 25.8214021  | 81.51729382 | 55.70517646 | 66.27399001 |
| ENSMUSG000000042428 | -0.272067911 | 0.934553409  | 0.124472324 | 0.72423362  | 0.999071534 | Mgat3         | Mgat3         | MGAT3        | 3.298461576 | 3.616692709 | 0.403921322 | 0.069382107 | 2.87771271  | 0.800383777 | 0.582437641 | 2.901463001 | 1.021392516 | 2.287563758 |
| ENSMUSG000000020267 | 0.106072416  | 8.647470769  | 0.124421898 | 0.724287205 | 0.999071534 | Hint1         | Hint1         | HINT1        | 536.1754563 | 302.5570966 | 374.7716666 | 438.2867671 | 349.7074969 | 370.5776886 | 666.826384  | 261.0625876 | 308.4605399 | 399.9315038 |
| ENSMUSG000000027810 | 0.07436641   | 6.170396233  | 0.124349206 | 0.724364473 | 0.999071534 | Elf2a         | Elf2a         | EIF2A        | 68.4255327  | 79.38936946 | 68.93590563 | 70.70036657 | 76.19398426 | 72.03453991 | 87.10678502 | 78.68491328 | 49.10540944 | 70.32624581 |
| ENSMUSG000000031391 | 0.276388419  | 0.180675677  | 0.124345683 | 0.724368219 | 0.999071534 | L1cam         | L1cam         | L1CAM        | 2.315941107 | 0.592900444 | 0.269280881 | 0.20814632  | 1.438856355 | 1.45524323  | 0.517722348 | 0.552659619 | 1.885647722 | 0.784307574 |
| ENSMUSG000000073176 | 0.168820669  | 1.993352206  | 0.124337477 | 0.724376943 | 0.999071534 | Zfp449        | Zfp449        | ZNF449       | 5.965302851 | 4.446753331 | 2.625488593 | 2.01208109  | 3.924153696 | 3.929156722 | 8.024696391 | 3.108710358 | 2.042785033 | 2.810435474 |
| ENSMUSG000000026620 | 0.291003745  | -0.188918355 | 0.124262609 | 0.724456556 | 0.999071534 | Mark1         | Mark1         | MARK1        | 1.333420637 | 0.889350666 | 0           | 0.416292639 | 0.850233301 | 1.236956746 | 1.29430587  | 0.552659619 | 0.392843275 | 0.588230681 |
| ENSMUSG000000034947 | -0.072518972 | 5.455504089  | 0.124204477 | 0.724518389 | 0.999071534 | Tmem106a      | Tmem106a      | TMEM106A     | 50.81034428 | 47.78777579 | 40.12285132 | 44.68207662 | 49.70594681 | 53.40742656 | 43.74753839 | 37.30452429 | 27.34189197 | 47.45060823 |
| ENSMUSG000000020477 | -0.092882794 | 5.558692169  | 0.124162092 | 0.724563484 | 0.999071534 | Mrps24        | Mrps24        | MRPS24       | 76.28569646 | 35.21828638 | 43.62350278 | 51.27337674 | 45.65098799 | 61.04745352 | 66.72146758 | 30.25811415 | 27.02761735 | 39.93432731 |
| ENSMUSG000000083619 | 0.371609676  | 0.759258083  | 0.124110294 | 0.724618605 | 0.999071534 | Gm14414       | Gm14414       |              | 0.701800335 | 0.830060622 | 3.298690797 | 1.248877918 | 1.111843547 | 0           | 1.747312924 | 0           | 5.499805857 | 0.196076894 |
| ENSMUSG000000092178 | -0.213157603 | 0.772204805  | 0.124060847 | 0.724671237 | 0.999071534 | Gm3912        | Gm3912        |              | 1.824680872 | 2.075151554 | 1.750325729 | 1.734552664 | 1.373453794 | 1.309718907 | 2.653327033 | 1.588896405 | 1.178529826 | 0.261435858 |
| ENSMUSG000000048387 | -0.098422619 | 5.567208699  | 0.12402471  | 0.724709708 | 0.999071534 | Osr1          | Osr1          | OSR1         | 34.17767633 | 34.15106558 | 65.50257439 | 57.72591265 | 61.21679765 | 43.00243746 | 25.69197151 | 45.80166594 | 41.87709317 | 61.56814456 |
| ENSMUSG000000029461 | -0.087251008 | 5.623875213  | 0.123927728 | 0.724812987 | 0.999071534 | Fam168a       | Fam168a       | FAM168A      | 41.05531962 | 64.92259863 | 43.48886234 | 57.93405897 | 55.0035543  | 50.93351307 | 28.53944442 | 57.89109511 | 48.24115423 | 41.69901935 |
| ENSMUSG000000094377 | 0.442370075  | 0.116714189  | 0.123923049 | 0.724817971 | 0.999071534 | Gm24407       | Gm24407       |              | 1.19306057  | 0.059290044 | 0           | 2.567137942 | 0.39241537  | 0           | 0           | 1.036236786 | 2.907040239 | 0.849666539 |
| ENSMUSG000000049295 | -0.10144766  | 4.490479862  | 0.123903215 | 0.724839099 | 0.999071534 | Zfp219        | Zfp219        | ZNF219       | 21.40491023 | 20.81080559 | 19.92678522 | 26.08767206 | 31.78564494 | 21.02826468 | 12.8783434  | 30.94893867 | 13.04239675 | 26.47038062 |
| ENSMUSG000000041238 | 0.091287033  | 4.665228175  | 0.123754113 | 0.724997988 | 0.999071534 | Rbbp8         | Rbbp8         | RBBP8        | 24.28229161 | 17.60914319 | 30.63070026 | 29.6955416  | 24.13354523 | 35.21688618 | 31.96935498 | 21.96821986 | 20.97783091 | 17.1240487  |
| ENSMUSG000000025612 | -0.081825767 | 5.021482986  | 0.123672524 | 0.725084978 | 0.999071534 | Bach1         | Bach1         | BACH1        | 30.94939479 | 47.49132557 | 33.79475061 | 28.37728158 | 32.37426799 | 41.76548071 | 21.93848449 | 34.33397884 | 25.53481291 | 29.47689299 |
| ENSMUSG000000015501 | 0.0936241    | 5.306778549  | 0.123610788 | 0.725150822 | 0.999071534 | Hivp2         | Hivp2         | HIVEP2       | 35.72163707 | 52.53097934 | 44.16206454 | 26.92025734 | 39.63395233 | 40.01918884 | 29.31602795 | 62.31237206 | 22.94204729 | 43.00619864 |
| ENSMUSG000000064138 | -0.083139674 | 4.886654515  | 0.123600317 | 0.725161992 | 0.999071534 | Fam172a       | Fam172a       | FAM172A      | 24.35247164 | 36.70053749 | 24.97580175 | 39.27027231 | 31.26242444 | 40.52852397 | 25.23896446 | 26.25133191 | 21.68494881 | 26.60109855 |
| ENSMUSG000000004931 | 0.09408289   | 5.309418198  | 0.123584265 | 0.725179115 | 0.999071534 | Apba3         | Apba3         | APBA3        | 41.61675989 | 51.64162868 | 33.86207083 | 21.2309246  | 51.86423135 | 37.69079967 | 31.7104938  | 57.06210568 | 33.47024707 | 35.22848187 |
| ENSMUSG000000037957 | 0.099640582  | 4.157822175  | 0.123505645 | 0.725263004 | 0.999071534 | Wdr20a        | Wdr20         | WDR20        | 20.77328993 | 15.29683146 | 11.37711724 | 21.85536356 | 19.29375567 | 24.44808627 | 22.58563742 | 13.0565835  | 15.47802505 | 13.85610048 |
| ENSMUSG000000076431 | 0.135897433  | 8.586246213  | 0.123494309 | 0.725275102 | 0.999071534 | Sox4          | Sox4          | SOX4         | 266.2630473 | 282.0427412 | 535.7343135 | 471.1738856 | 331.5255847 | 287.7015867 | 118.7525635 | 503.6801604 | 475.5760693 | 485.0288756 |
| ENSMUSG000000030340 | -0.280483573 | 0.035065091  | 0.123438671 | 0.72533449  | 0.999071534 | Scnn1a        | Scnn1a        | SCNN1A       | 0.491260235 | 1.422961066 | 1.077123525 | 1.040731598 | 0.981038424 | 1.309718907 | 0.258861174 | 1.036236786 | 0           | 1.437897219 |
| ENSMUSG000000032324 | 0.080930728  | 6.716391899  | 0.123392266 | 0.725384034 | 0.999071534 | Tspan3        | Tspan3        | TSPAN3       | 111.0248131 | 99.25153434 | 105.086864  | 107.6116473 | 106.6061754 | 99.24758832 | 149.4923279 | 104.5217505 | 81.08285206 | 85.81632039 |
| ENSMUSG000000027655 | 0.134413965  | 3.039163038  | 0.123355334 | 0.725423472 | 0.999071534 | Dhx35         | Dhx35         | DHX35        | 8.351423991 | 11.85800888 | 5.92417939  | 5.411804311 | 8.698540692 | 8.658697221 | 6.083237587 | 13.67832557 | 6.835472994 | 5.359435089 |
| ENSMUSG000000026499 | 0.083480704  | 5.885939211  | 0.123282358 | 0.725501419 | 0.999071534 | Acbd3         | Acbd3         | ACBD3        | 37.96739815 | 68.8950316  | 71.22479312 | 56.96270948 | 61.93622583 | 62.2116481  | 44.20054545 | 71.63850313 | 57.35511822 | 54.57473536 |
| ENSMUSG000000034255 | -0.149007318 | 3.064189374  | 0.123161006 | 0.725631093 | 0.999071534 | Arhgap27      | Arhgap27      | ARHGAP27     | 13.12366627 | 10.61291795 | 6.462741153 | 4.995511672 | 10.13739705 | 17.53568093 | 5.112508185 | 6.286503168 | 2.514196963 | 8.823460208 |
| ENSMUSG000000091144 | 0.219956149  | 1.117109011  | 0.12308599  | 0.72571129  | 0.999071534 | Phf11c        | Phf11c        | PHF11        | 0.491260235 | 1.541541155 | 1.750325729 | 3.538487434 | 2.289089656 | 2.037340523 | 1.553167044 | 1.519813953 | 0.628549241 | 5.032640267 |

|                    |              |              |             |             |             |               |               |               |             |             |             |             |             |             |             |             |             |             |
|--------------------|--------------|--------------|-------------|-------------|-------------|---------------|---------------|---------------|-------------|-------------|-------------|-------------|-------------|-------------|-------------|-------------|-------------|-------------|
| ENSMUSG00000027994 | -0.101888626 | 5.808397779  | 0.123028565 | 0.7257727   | 0.999071534 | Ccdc109b      | Ccdc109b      | CCDC109B      | 84.07568018 | 57.2741829  | 36.89148075 | 60.4318148  | 62.39404376 | 45.11254014 | 93.70774496 | 51.53550949 | 24.98483232 | 47.71204409 |
| ENSMUSG00000022565 | -0.094415678 | 8.601528622  | 0.122906145 | 0.725903668 | 0.999071534 | Plec          | Plec          | PLEC          | 347.391166  | 360.3648899 | 488.9467603 | 453.6895947 | 424.9858453 | 602.2524109 | 276.9167408 | 333.2537503 | 247.9626755 | 405.029503  |
| ENSMUSG00000022064 | -0.106513026 | 3.293760572  | 0.122848736 | 0.72596511  | 0.999071534 | Pibf1         | Pibf1         | PIBF1         | 9.684844629 | 11.79871884 | 9.155549966 | 9.297202278 | 12.23027902 | 11.20537287 | 10.22501637 | 9.187966168 | 6.364061063 | 8.496665386 |
| ENSMUSG00000025931 | 0.095961104  | 4.013926116  | 0.122785033 | 0.726033309 | 0.999071534 | Paqr8         | Paqr8         | PAQR8         | 20.49256979 | 15.94902195 | 12.2522801  | 13.32136446 | 18.77053518 | 23.42941601 | 19.73816451 | 14.30006765 | 10.29249382 | 14.05217737 |
| ENSMUSG00000035168 | -0.080241379 | 5.487682994  | 0.122780746 | 0.726037899 | 0.999071534 | Tanc1         | Tanc1         | TANC1         | 37.26559781 | 50.93014815 | 43.75814322 | 47.94303563 | 58.73150031 | 52.17046981 | 28.86302089 | 50.08477799 | 38.26293503 | 40.52255799 |
| ENSMUSG00000031393 | 0.087571641  | 5.900110734  | 0.122673708 | 0.726152537 | 0.999071534 | Mecp2         | Mecp2         | MECP2         | 52.21394496 | 65.33762894 | 51.23068768 | 63.69277381 | 67.1030282  | 57.91868057 | 32.81065379 | 71.84575049 | 63.71917928 | 64.50929797 |
| ENSMUSG00000024544 | 0.135245851  | 2.982950514  | 0.12266484  | 0.726162037 | 0.999071534 | Ldlrad4       | Ldlrad4       | LDLRAD4       | 6.596923153 | 10.49433786 | 9.76143195  | 3.260959008 | 8.633138131 | 12.15128097 | 7.636404631 | 9.257048621 | 3.771295445 | 7.712357812 |
| ENSMUSG00000039987 | 0.095964273  | 4.136863702  | 0.122658767 | 0.726168543 | 0.999071534 | Phtf2         | Phtf2         | PHTF2         | 16.21158775 | 12.27303919 | 18.8496617  | 18.73316877 | 21.4520402  | 22.55627007 | 23.10335977 | 12.43484143 | 14.53520119 | 15.29399769 |
| ENSMUSG00000024006 | 0.077706934  | 5.990863338  | 0.122632734 | 0.726196435 | 0.999071534 | Stk38         | Stk38         | STK38         | 65.40779126 | 59.64578467 | 69.20518651 | 60.84810744 | 65.46796416 | 57.11829679 | 49.44248422 | 76.95785197 | 60.65500174 | 65.5550414  |
| ENSMUSG00000053192 | 0.079830089  | 4.776645982  | 0.122623887 | 0.726205915 | 0.999071534 | Mlt11         | Mlt11         | MLLT11        | 25.96661241 | 24.13104807 | 29.75553739 | 27.82222473 | 29.88897065 | 26.55818896 | 31.83992439 | 23.55711627 | 23.02061594 | 29.80368781 |
| ENSMUSG00000079225 | -0.112757983 | 5.747644023  | 0.122539392 | 0.726296469 | 0.999071534 | Gm9531        | Gm9531        |               | 79.02271777 | 68.24284111 | 46.18167115 | 36.56437015 | 61.28220022 | 89.0608857  | 87.62450737 | 23.97161098 | 26.00622484 | 33.46378983 |
| ENSMUSG00000068284 | -0.119619821 | 3.290128599  | 0.1225319   | 0.7263045   | 0.999071534 | Gm608         | Usf3          | USF3          | 11.0884453  | 15.8897319  | 7.607184899 | 7.493267507 | 10.33360473 | 16.00767553 | 7.571689337 | 8.151729382 | 5.499805857 | 9.019537102 |
| ENSMUSG00000047412 | 0.094934152  | 4.541410881  | 0.122513437 | 0.726324293 | 0.999071534 | Zbtb44        | Zbtb44        | ZBTB44        | 17.68536845 | 21.93731643 | 24.03331866 | 28.72419211 | 23.21790937 | 25.03018356 | 15.20809397 | 27.4257336  | 25.06340098 | 21.04558657 |
| ENSMUSG00000010362 | -0.145382516 | 3.049740913  | 0.122489895 | 0.726349531 | 0.999071534 | Rdm1          | Rdm1          | RDM1          | 12.91312617 | 9.96072746  | 5.250977187 | 8.603381212 | 7.78290483  | 11.42365936 | 13.97850339 | 4.144947144 | 3.064177549 | 6.209101628 |
| ENSMUSG00000040331 | 0.098189369  | 5.603647013  | 0.122456157 | 0.726385707 | 0.999071534 | Nsmce4a       | Nsmce4a       | NSMCE4A       | 72.77669478 | 40.19865011 | 41.87317705 | 46.97168613 | 41.7268343  | 71.88901558 | 79.59981098 | 33.91948413 | 22.31349805 | 43.07155761 |
| ENSMUSG00000059277 | -0.146990582 | 2.03901137   | 0.122418845 | 0.726425721 | 0.999071534 | R74862        | R74862        |               | 4.35116208  | 4.506043375 | 3.971893    | 3.260959008 | 5.690022859 | 3.34705943  | 4.077063489 | 5.388431287 | 2.042785033 | 3.398666154 |
| ENSMUSG00000061950 | 0.106933438  | 5.542625134  | 0.122409304 | 0.726435954 | 0.999071534 | Ppp4r1        | Ppp4r1        | PPP4R1        | 64.70599093 | 65.6933692  | 26.99540836 | 28.86295632 | 48.07088277 | 94.7363343  | 52.28995713 | 34.12673148 | 21.5278115  | 42.94083968 |
| ENSMUSG00000078636 | -0.16117048  | 5.037377401  | 0.122238529 | 0.726619193 | 0.999071534 | Gm7336        | Gm7336        |               | 11.15862533 | 46.77984504 | 31.90978444 | 33.02588272 | 56.63861834 | 8.658697221 | 12.81362811 | 58.65100208 | 28.5204218  | 33.85594361 |
| ENSMUSG00000026721 | 0.104863867  | 4.800356613  | 0.122236155 | 0.726621741 | 0.999071534 | Rabgap1l      | Rabgap1l      | RABGAP1L      | 19.51004932 | 31.30514345 | 30.63070026 | 22.13289199 | 35.51359095 | 23.35665385 | 18.12028217 | 46.90698518 | 17.20653547 | 32.54876432 |
| ENSMUSG00000026304 | 0.268873224  | -0.196482477 | 0.122022852 | 0.726850816 | 0.999071534 | Rab17         | Rab17         | RAB17         | 0.98252047  | 0.474320355 | 1.279084186 | 0.346910533 | 0.457817931 | 0.436572969 | 0.323576467 | 0.621742072 | 1.492804447 | 0.849666539 |
| ENSMUSG00000072244 | 0.1621959    | 1.458834372  | 0.121975027 | 0.726902208 | 0.999071534 | Trim6         | Trim6         | TRIM6         | 3.087921476 | 2.430891821 | 2.760129034 | 1.665170557 | 2.943115272 | 2.037340523 | 2.459181152 | 3.592287524 | 2.199922343 | 2.875794438 |
| ENSMUSG00000023075 | 0.081483149  | 5.880436002  | 0.121951909 | 0.726927053 | 0.999071534 | Akirin1       | Akirin1       | AKIRIN1       | 71.09237398 | 53.30174992 | 48.60519909 | 58.55849793 | 65.33715903 | 73.27149665 | 89.04824383 | 39.99873994 | 41.71995586 | 52.02573575 |
| ENSMUSG00000031820 | -0.087175708 | 5.582330864  | 0.121747226 | 0.727147154 | 0.999071534 | Babam1        | Babam1        | BABAM1        | 71.79417431 | 52.29381917 | 39.31500868 | 40.03347548 | 53.43389282 | 71.30691829 | 61.02652175 | 28.32380548 | 29.93465759 | 39.73825042 |
| ENSMUSG00000068134 | 0.092548995  | 4.903350391  | 0.121729515 | 0.727166209 | 0.999071534 | Zfp120        | Zfp120        | ZNF788        | 29.47561409 | 24.19033812 | 32.4483462  | 36.56437015 | 26.2264272  | 25.61228086 | 32.81065379 | 26.80399153 | 37.16297386 | 21.82989414 |
| ENSMUSG00000002635 | 0.090725009  | 4.235306246  | 0.121670184 | 0.727230053 | 0.999071534 | Pdcd2l        | Pdcd2l        | RP11-618P17.4 | 17.54500839 | 21.40370603 | 20.12874588 | 17.9699656  | 16.93926345 | 18.77263767 | 23.62108212 | 22.38271458 | 11.94243557 | 16.86261284 |
| ENSMUSG00000075704 | 0.096992908  | 3.912972022  | 0.121647817 | 0.727254126 | 0.999071534 | Txnrd2        | Txnrd2        | TXNRD2        | 15.43960738 | 14.40748079 | 15.41633046 | 16.09664872 | 13.34212257 | 14.47967014 | 13.00777399 | 14.16190274 | 17.04939816 | 14.37897219 |
| ENSMUSG00000094497 | -0.082222001 | 6.376192178  | 0.121554732 | 0.727354337 | 0.999071534 | Gm8210        | Gm8210        |               | 92.98854444 | 91.89956883 | 80.38034309 | 80.89953624 | 97.44981678 | 87.96945328 | 109.4335613 | 85.10958135 | 37.16297386 | 76.66606536 |
| ENSMUSG00000041143 | 0.152370507  | 2.690272378  | 0.121551904 | 0.727357382 | 0.999071534 | Tmco4         | Tmco4         | TMCO4         | 6.596923153 | 7.944865951 | 4.308494102 | 5.61995063  | 6.671061283 | 12.6606161  | 3.041618794 | 6.562832977 | 2.121353688 | 9.477049853 |
| ENSMUSG00000083833 | -0.082222128 | 6.376192178  | 0.121531549 | 0.727379302 | 0.999071534 | Gm13841       | Gm13841       |               | 92.98854444 | 91.89956883 | 80.38034309 | 80.89953624 | 97.44981678 | 87.96945328 | 109.4335613 | 85.10958135 | 37.16297386 | 76.66606536 |
| ENSMUSG00000069307 | -0.317017703 | 0.722807011  | 0.121442363 | 0.727475365 | 0.999071534 | Hist1h2bq     | Hist1h2bq     |               | 3.579181711 | 0.889350666 | 3.971893    | 0           | 0.39241537  | 0.291048646 | 0.453007054 | 0.039627905 | 0.549980586 | 2.0261279   |
| ENSMUSG00000024592 | 0.109835431  | 3.887345264  | 0.1213969   | 0.72752435  | 0.999071534 | C330018D20Rik | C330018D20Rik | CSorf63       | 17.96608859 | 13.81458035 | 12.31960032 | 18.59440456 | 10.20279961 | 13.97033501 | 24.20351976 | 11.81309936 | 9.428238612 | 14.50969012 |
| ENSMUSG00000032059 | 0.085010584  | 4.466544134  | 0.121334662 | 0.727591425 | 0.999071534 | Alg9          | Alg9          | RP11-108O10.8 | 19.15914916 | 23.47885759 | 18.64770103 | 21.30030671 | 28.25390661 | 21.90141062 | 27.63343032 | 21.13923043 | 18.07079067 | 20.19592003 |
| ENSMUSG00000058396 | -0.256220011 | 0.430307753  | 0.121285612 | 0.727644301 | 0.999071534 | Gpr182        | Gpr182        | GPRI82        | 1.754500839 | 1.126510844 | 2.086926831 | 0.901967385 | 0.981038424 | 1.164194584 | 0.582437641 | 2.141556024 | 0           | 1.568615148 |
| ENSMUSG00000038843 | 0.134235608  | 3.669943555  | 0.121229976 | 0.727704291 | 0.999071534 | Gcnt1         | Gcnt1         | GCNT1         | 13.19384631 | 14.2889007  | 7.337904017 | 13.52951078 | 13.99614818 | 16.29872418 | 18.63800452 | 11.19135729 | 2.671334273 | 17.25476663 |
| ENSMUSG00000005267 | 0.245364368  | 0.11600461   | 0.121226036 | 0.72770854  | 0.999071534 | Zfp287        | Zfp287        | ZNF287        | 2.035220973 | 0.948640711 | 0.336601102 | 0.346910533 | 0.915635862 | 1.600767553 | 0.582437641 | 0.898071881 | 1.099961171 | 0.849666539 |
| ENSMUSG00000028539 | 0.169623657  | 1.784511794  | 0.121210404 | 0.727725399 | 0.999071534 | Artn          | Artn          | ARTN          | 4.56170218  | 1.660121243 | 2.558168373 | 3.81601586  | 3.597140888 | 4.147443207 | 2.135604685 | 1.865226215 | 4.556981996 | 3.986896835 |
| ENSMUSG00000017428 | 0.077168094  | 6.943152622  | 0.1211828   | 0.727755171 | 0.999071534 | Psmid11       | Psmid11       | PSMD11        | 127.657481  | 122.0782014 | 125.6868514 | 118.7821664 | 127.0117746 | 161.8230472 | 105.8095048 | 98.2352473  | 114.6316678 | 131.3715187 |
| ENSMUSG00000033530 | -0.088596583 | 4.326663842  | 0.121173406 | 0.727765305 | 0.999071534 | Ttc7b         | Ttc7b         | TTC7B         | 23.8612114  | 25.79116932 | 17.83985839 | 15.54159187 | 24.13354523 | 23.72046466 | 13.52549634 | 18.8595095  | 17.20653547 | 20.13056107 |
| ENSMUSG00000027954 | -0.085977754 | 5.879542999  | 0.121104826 | 0.727839292 | 0.999071534 | Efna1         | Efna1         | EFNA1         | 59.58284848 | 56.32554219 | 58.36663104 | 68.27199284 | 71.02718189 | 40.81957261 | 59.66750059 | 82.20811835 | 34.57020824 | 56.07799155 |

|                     |              |             |             |             |             |               |               |          |             |             |             |             |             |             |             |             |             |             |
|---------------------|--------------|-------------|-------------|-------------|-------------|---------------|---------------|----------|-------------|-------------|-------------|-------------|-------------|-------------|-------------|-------------|-------------|-------------|
| ENSMUSG00000034602  | 0.078732995  | 5.897589552 | 0.120950012 | 0.7280064   | 0.999071534 | Mon2          | Mon2          | MON2     | 55.6527666  | 71.38521347 | 50.9614068  | 49.67758829 | 73.70868692 | 74.87226421 | 41.02949607 | 77.37234668 | 46.90548709 | 56.47014533 |
| ENSMUSG00000035314  | -0.119415086 | 3.626691749 | 0.120949435 | 0.728007023 | 0.999071534 | Gdpd5         | Gdpd5         | GDPD5    | 16.98356812 | 9.54569715  | 16.5607742  | 11.17051915 | 11.90326621 | 23.21112953 | 9.577863435 | 5.872008453 | 10.44963113 | 9.346331924 |
| ENSMUSG00000021254  | -0.123499938 | 3.434918545 | 0.120809716 | 0.728157942 | 0.999071534 | Gpatch2l      | Gpatch2l      | GPATCH2L | 13.89564664 | 16.4233423  | 7.87646578  | 7.354503294 | 12.68809695 | 17.53568093 | 13.00777399 | 8.220811835 | 4.635550651 | 8.104511599 |
| ENSMUSG00000030516  | 0.099408118  | 6.583540093 | 0.120801124 | 0.728167226 | 0.999071534 | Tjp1          | Tjp1          | TJP1     | 70.53093371 | 114.4297857 | 63.41564756 | 98.66135551 | 133.4212257 | 101.4304532 | 52.09581125 | 136.8523382 | 86.11124599 | 97.64629297 |
| ENSMUSG00000063543  | -0.32574763  | 3.346353913 | 0.120664166 | 0.728315262 | 0.999071534 | Gm5616        | Gm5616        | SNU13    | 10.6673651  | 20.09932505 | 10.97319592 | 0           | 17.13547114 | 10.76879991 | 24.65652682 | 5.388431287 | 0           | 4.379050622 |
| ENSMUSG00000024963  | 0.103720703  | 3.696199653 | 0.1204965   | 0.728496618 | 0.999071534 | Dnajc4        | Dnajc4        | DNAIC4   | 12.1411458  | 10.5536279  | 13.46404407 | 12.48877918 | 15.56580966 | 9.677367482 | 11.32517636 | 14.64547991 | 11.70672961 | 15.68615148 |
| ENSMUSG00000082013  | -0.231980386 | 0.173255797 | 0.120462347 | 0.728533577 | 0.999071534 | Gm13216       | Gm13216       |          | 0.771980369 | 0.592900444 | 1.481044848 | 1.318260024 | 1.373453794 | 0.873145938 | 1.48845175  | 0.828989429 | 0.235705965 | 1.045743432 |
| ENSMUSG00000009640  | 0.095666601  | 4.065055379 | 0.120291891 | 0.728718125 | 0.999071534 | Dmap1         | Dmap1         | DMAP1    | 13.75528657 | 16.06760203 | 19.72482456 | 14.8477708  | 18.96674286 | 17.46291877 | 11.32517636 | 16.09621141 | 17.12796681 | 19.86912521 |
| ENSMUSG00000031010  | 0.089984782  | 8.198896806 | 0.120269583 | 0.728742289 | 0.999071534 | Usp9x         | Usp9x         | USP9X    | 229.8396098 | 330.8977378 | 266.9246737 | 290.7804085 | 359.1254657 | 326.4110566 | 258.214021  | 305.0681098 | 271.2189974 | 294.3114172 |
| ENSMUSG00000029621  | 0.085137905  | 6.928686393 | 0.120204352 | 0.728812959 | 0.999071534 | Arpc1a        | Arpc1a        | ARPC1A   | 124.4993795 | 119.6473096 | 103.4711787 | 123.2226212 | 142.5775843 | 94.15423701 | 163.5355466 | 128.2170316 | 102.6892322 | 108.56124   |
| ENSMUSG00000052934  | -0.084318207 | 4.744505856 | 0.120197931 | 0.728819917 | 0.999071534 | Fbxo31        | Fbxo31        | FBXO31   | 32.0020953  | 21.52228612 | 23.09083558 | 34.06661432 | 31.52403469 | 32.96125917 | 21.8737692  | 24.59335305 | 16.81369219 | 30.71871332 |
| ENSMUSG00000070476  | -0.1680853   | 2.531974954 | 0.120114557 | 0.728910277 | 0.999071534 | Fam217b       | Fam217b       | FAM217B  | 5.474042616 | 4.506043375 | 4.106533441 | 13.46012867 | 2.87771271  | 8.003837767 | 2.329750565 | 6.010173358 | 5.264099892 | 4.248332693 |
| ENSMUSG00000054626  | 0.081649548  | 5.434962021 | 0.120049045 | 0.728981302 | 0.999071534 | Xlr           | Xlr           |          | 40.56405939 | 41.85877135 | 42.27709837 | 53.14669362 | 38.71831646 | 42.34757801 | 63.29155702 | 38.75525579 | 27.26332332 | 43.92122415 |
| ENSMUSG00000024181  | 0.108328682  | 6.572105707 | 0.119972737 | 0.72906406  | 0.999071534 | Mrpl28        | Mrpl28        | MRPL28   | 167.5197401 | 77.66995817 | 73.98492216 | 72.78182977 | 85.54655057 | 110.9622963 | 177.061043  | 56.02586889 | 61.28355098 | 78.36539844 |
| ENSMUSG00000016239  | 0.212474422  | 0.813410796 | 0.119915014 | 0.729126682 | 0.999071534 | Lonrf3        | Lonrf3        | LONRF3   | 4.000261912 | 1.363671021 | 0.471214542 | 0.901967385 | 1.177246109 | 1.8918162   | 1.29430587  | 2.003391119 | 1.571373102 | 1.633974113 |
| ENSMUSG00000020522  | 0.090321739  | 4.662768665 | 0.119898397 | 0.729144712 | 0.999071534 | Mfap3         | Mfap3         | MFAP3    | 27.93165335 | 36.5819574  | 18.58038081 | 17.9699656  | 26.35723232 | 32.59744836 | 34.23439025 | 22.65904439 | 16.18514295 | 22.02597104 |
| ENSMUSG00000028180  | 0.079996606  | 6.877871988 | 0.119892827 | 0.729150757 | 0.999071534 | Zranb2        | Zranb2        | ZRANB2   | 103.8664496 | 99.72585469 | 145.0077546 | 118.6434022 | 124.8534901 | 122.2404314 | 150.9807797 | 112.1899027 | 83.83275499 | 116.2735979 |
| ENSMUSG00000039254  | -0.095162888 | 3.71346436  | 0.119562915 | 0.729509028 | 0.999071534 | Pomt1         | Pomt1         | POMT1    | 13.19384631 | 11.79871884 | 13.53136429 | 16.30479504 | 14.58477124 | 16.15319986 | 13.00777399 | 10.22420295 | 9.899650542 | 11.9606905  |
| ENSMUSG00000062461  | -0.291162426 | 0.256029447 | 0.119556919 | 0.729515545 | 0.999071534 | Gm5453        | Gm5453        |          | 1.122880537 | 1.48225111  | 2.221567271 | 0.069382107 | 1.177246109 | 0.727621615 | 1.229590576 | 1.519813953 | 0           | 1.176461361 |
| ENSMUSG00000021816  | 0.078049365  | 6.536531236 | 0.119546076 | 0.729527329 | 0.999071534 | Ppp3cb        | Ppp3cb        | PPP3CB   | 102.1119488 | 92.49246928 | 85.90060116 | 85.33999106 | 103.2706448 | 123.1863395 | 128.7187187 | 85.1786638  | 56.80513764 | 75.35888607 |
| ENSMUSG00000038467  | -0.084458806 | 7.473824986 | 0.11954408  | 0.729529499 | 0.999071534 | Chmp4b        | Chmp4b        | CHMP4B   | 189.6264506 | 223.8792077 | 195.6998805 | 152.9181628 | 189.5366235 | 206.1352036 | 180.4262382 | 178.3018096 | 97.66083829 | 184.3122799 |
| ENSMUSG00000018593  | -0.089306304 | 10.49054507 | 0.11947752  | 0.729601854 | 0.999071534 | Sparc         | Sparc         | SPARC    | 1257.205121 | 1704.529487 | 1589.161121 | 1568.243754 | 1569.399868 | 1392.012912 | 1709.583908 | 1384.826841 | 1018.328339 | 1236.395532 |
| ENSMUSG00000049553  | 0.107792845  | 4.638362177 | 0.119472179 | 0.72960766  | 0.999071534 | Polr1a        | Polr1a        | POLR1A   | 26.31751258 | 25.4947191  | 29.82285761 | 17.48429085 | 25.17998621 | 58.13696706 | 18.44385864 | 13.74740803 | 13.98522061 | 27.45076509 |
| ENSMUSG00000028933  | 0.163712371  | 2.557583479 | 0.11946045  | 0.729620413 | 0.999071534 | Xrcc2         | Xrcc2         | XRCC2    | 7.649623656 | 4.683913508 | 3.231370576 | 3.885397967 | 8.960150939 | 11.3508972  | 9.836724609 | 2.141556024 | 2.514196963 | 5.097999231 |
| ENSMUSG00000051832  | 0.248354504  | 0.429877181 | 0.119406573 | 0.729679002 | 0.999071534 | E230016K23Rik | E230016K23Rik |          | 0.280720134 | 0.592900444 | 2.692808814 | 1.387642131 | 0.784830739 | 0.873145938 | 0.647152935 | 2.210638477 | 1.649941757 | 0.784307574 |
| ENSMUSG000000006169 | 0.076220422  | 6.402549468 | 0.119376276 | 0.729711956 | 0.999071534 | Clint1        | Clint1        | CLINT1   | 100.0065478 | 97.53212305 | 72.36923687 | 81.17706466 | 76.19398426 | 132.2816096 | 85.48890269 | 67.00997882 | 70.71178959 | 70.91447649 |
| ENSMUSG000000002320 | 0.083341025  | 6.017015151 | 0.119214905 | 0.729887553 | 0.999071534 | Tm9sf1        | Tm9sf1        | TM9SF1   | 80.70703857 | 72.51172431 | 63.07904646 | 49.26129565 | 61.60921302 | 101.7215018 | 87.43036149 | 43.45286256 | 46.43407516 | 50.4571206  |
| ENSMUSG00000032418  | -0.087254645 | 7.389152148 | 0.119086834 | 0.73002701  | 0.999071534 | Me1           | Me1           | ME1      | 150.746712  | 178.2851635 | 179.4083872 | 202.5957511 | 181.9499264 | 146.397469  | 125.029947  | 186.3153741 | 138.4379703 | 179.8025114 |
| ENSMUSG000000041939 | 0.125849092  | 3.932861551 | 0.119053906 | 0.730062878 | 0.999071534 | Mvk           | Mvk           | MVK      | 20.98383003 | 15.00038123 | 11.30979702 | 12.62754339 | 15.56580966 | 30.63287    | 24.46238094 | 7.046410144 | 6.678335683 | 11.82997258 |
| ENSMUSG000000043259 | -0.101683006 | 4.090376554 | 0.119030751 | 0.730088105 | 0.999071534 | Fam13c        | Fam13c        | FAM13C   | 15.43960738 | 18.43920381 | 12.31960032 | 21.1615425  | 23.34871449 | 19.71854577 | 15.07866338 | 13.60924312 | 8.406846095 | 23.52922722 |
| ENSMUSG000000025723 | 0.201021298  | 0.683828782 | 0.118890752 | 0.730240686 | 0.999071534 | Nmb           | Nmb           | NMB      | 1.263240604 | 0.948640711 | 1.346404407 | 2.22022741  | 1.308051232 | 1.164194584 | 1.29430587  | 1.036236786 | 2.357059653 | 1.503256184 |
| ENSMUSG00000046691  | -0.099761252 | 6.299997098 | 0.118855834 | 0.730278758 | 0.999071534 | Chtf8         | Chtf8         | CHTF8    | 112.1476936 | 98.24360358 | 66.57969792 | 63.97030224 | 83.71527884 | 145.5970852 | 102.5090249 | 43.17653275 | 40.38428872 | 53.59435089 |
| ENSMUSG000000001569 | 0.074318103  | 5.400838831 | 0.118827998 | 0.730309113 | 0.999071534 | Nom1          | Nom1          | NOM1     | 44.7748614  | 37.70846824 | 46.45095204 | 41.76802814 | 42.18465223 | 58.71906435 | 35.78755729 | 31.29435093 | 40.777132   | 43.20227554 |
| ENSMUSG00000048668  | -0.086531664 | 4.854660018 | 0.118800515 | 0.730339086 | 0.999071534 | Rhno1         | Rhno1         | RHNO1    | 30.80903472 | 17.72772328 | 37.83396383 | 35.10734591 | 31.98185262 | 36.3083186  | 23.55636683 | 22.72812684 | 23.49202787 | 29.86904678 |
| ENSMUSG00000024912  | 0.091361823  | 6.565022174 | 0.11866388  | 0.730488162 | 0.999071534 | Fosl1         | Fosl1         | FOSL1    | 68.6360728  | 79.27078937 | 131.9476319 | 73.26750452 | 123.218426  | 96.6281505  | 61.93253586 | 107.2159661 | 98.91793677 | 99.01883122 |
| ENSMUSG00000029771  | -0.097375644 | 4.535806    | 0.118657749 | 0.730494853 | 0.999071534 | Irf5          | Irf5          | IRF5     | 37.47613791 | 27.86632087 | 18.44574037 | 21.30030671 | 19.09754799 | 39.50985371 | 20.70889391 | 15.8198816  | 13.8280833  | 12.82989414 |
| ENSMUSG00000028645  | -0.178944902 | 9.146208757 | 0.118623869 | 0.730531834 | 0.999071534 | Slc2a1        | Slc2a1        | SLC2A1   | 335.5307404 | 1291.100007 | 498.4389114 | 388.6785609 | 626.4911375 | 123.6956746 | 198.4170898 | 1309.457885 | 337.5309423 | 505.4208725 |
| ENSMUSG00000054931  | -0.282675068 | 0.118673277 | 0.118548635 | 0.730613974 | 0.999071534 | Zkscan4       | Zkscan4       | ZKSCAN3  | 0.701800335 | 0.474320355 | 0.134640441 | 2.705902155 | 1.308051232 | 1.236956746 | 1.423736457 | 0.138164905 | 0.707117896 | 0.71894861  |
| ENSMUSG00000026657  | -0.078896381 | 5.05296329  | 0.118510887 | 0.730655198 | 0.999071534 | Frmd4a        | Frmd4a        | FRMD4A   | 28.91471382 | 40.3172302  | 44.09474432 | 27.40593209 | 35.90600632 | 47.14988067 | 24.72124211 | 28.66921774 | 27.34189197 | 29.47689299 |

|                     |              |              |             |             |             |               |               |          |             |             |             |             |             |             |             |             |             |             |
|---------------------|--------------|--------------|-------------|-------------|-------------|---------------|---------------|----------|-------------|-------------|-------------|-------------|-------------|-------------|-------------|-------------|-------------|-------------|
| ENSMUSG00000078870  | 0.346279426  | 0.462165978  | 0.118478186 | 0.730690916 | 0.999071534 | Gm14410       | Gm14410       | ZNF788   | 4.210802013 | 0           | 0           | 0.555056852 | 1.046440986 | 0.727621615 | 0.841298815 | 3.385040167 | 0.707117896 | 0.980384468 |
| ENSMUSG000000034799 | 0.130589445  | 3.040847245  | 0.118437444 | 0.730735426 | 0.999071534 | Unc13a        | Unc13a        | UNC13A   | 7.439083555 | 11.44297857 | 5.049016526 | 8.325852786 | 7.848307392 | 5.893735083 | 6.147952881 | 12.57300634 | 7.149747614 | 8.300588492 |
| ENSMUSG000000031158 | -0.080660775 | 5.976326818  | 0.11841608  | 0.730758769 | 0.999071534 | Timm17b       | Timm17b       | TIMM17B  | 70.10985351 | 48.26209615 | 68.26270343 | 74.1694719  | 73.83949204 | 56.09962653 | 85.55361798 | 50.70652006 | 40.93426931 | 62.4178111  |
| ENSMUSG000000036109 | 0.123786241  | 3.362704379  | 0.118402408 | 0.730773708 | 0.999071534 | Mbnl3         | Mbnl3         | MBNL3    | 14.45708691 | 13.28096995 | 8.213066882 | 7.701413827 | 6.998074091 | 17.53568093 | 14.56094103 | 7.529987311 | 6.678335683 | 6.53589645  |
| ENSMUSG000000081783 | -0.281239579 | 0.220837365  | 0.118357987 | 0.730822253 | 0.999071534 | Gm15599       | Gm15599       |          | 2.035220973 | 0.830060622 | 1.077123525 | 1.179495811 | 0.719428178 | 2.182864846 | 1.876743511 | 0.621742072 | 0.078568655 | 0.065358965 |
| ENSMUSG000000025779 | 0.145752456  | 2.853809079  | 0.118330486 | 0.730852313 | 0.999071534 | Ly96          | Ly96          | LY96     | 6.947823321 | 6.521904885 | 10.97319592 | 3.538487434 | 7.194281776 | 3.492583753 | 5.75966112  | 9.464295978 | 8.01400282  | 7.908434705 |
| ENSMUSG000000048076 | -0.085111719 | 9.038321076  | 0.118165934 | 0.731032258 | 0.999071534 | Arf1          | Arf1          | ARF1     | 581.4415779 | 612.0511284 | 571.34671   | 487.2705343 | 562.0696144 | 651.5851564 | 605.5410011 | 413.4584776 | 371.3940326 | 455.0291109 |
| ENSMUSG000000026849 | 0.076402425  | 5.045732807  | 0.11810183  | 0.731102397 | 0.999071534 | Tor1a         | Tor1a         | TOR1A    | 36.42343741 | 33.32100496 | 33.66011017 | 30.25059846 | 32.76668336 | 30.34182135 | 43.35924663 | 31.22526848 | 28.20614718 | 28.75794438 |
| ENSMUSG000000052087 | -0.23160607  | 1.635975719  | 0.117983044 | 0.73123242  | 0.999071534 | Rgs14         | Rgs14         | RGS14    | 4.772242281 | 4.446753331 | 1.88496617  | 2.22022741  | 3.400933203 | 6.985167506 | 3.753487022 | 0.345412262 | 0.15713731  | 3.202589261 |
| ENSMUSG000000085442 | 0.411999521  | -0.272526123 | 0.117910263 | 0.731312123 | 0.999071534 | Gm3362        | Gm3362        |          | 1.965040939 | 0.711480533 | 0.471241542 | 0           | 0           | 0.654859454 | 0.388291761 | 2.556050739 | 0.235705965 | 0           |
| ENSMUSG000000040836 | 0.099041538  | 4.030040748  | 0.117786602 | 0.731447608 | 0.999071534 | Gpr161        | Gpr161        | GPRI61   | 13.61492651 | 14.11103057 | 16.5607742  | 21.71659935 | 14.6501738  | 21.90141062 | 11.71346812 | 16.64887103 | 17.36367278 | 13.0717929  |
| ENSMUSG000000022329 | -0.072767261 | 5.725237628  | 0.117786045 | 0.731448218 | 0.999071534 | Stk3          | Stk3          | STK3     | 43.3010807  | 52.59026939 | 59.37643434 | 58.07282318 | 67.1030282  | 56.90001031 | 41.676649   | 51.32826213 | 46.90548709 | 50.4571206  |
| ENSMUSG000000039357 | -0.141342257 | 2.307164428  | 0.117779334 | 0.731455573 | 0.999071534 | Fut11         | Fut11         | FUT11    | 4.070441945 | 5.039653775 | 5.789538949 | 5.273040098 | 6.017035667 | 7.203453991 | 5.047792891 | 5.733843549 | 1.728510412 | 3.202589261 |
| ENSMUSG000000028247 | 0.107550389  | 3.996039041  | 0.117777421 | 0.73145767  | 0.999071534 | Coq3          | Coq3          | COQ3     | 15.36942735 | 16.54192239 | 15.61829112 | 16.85985189 | 14.51936867 | 12.73337827 | 23.94465859 | 8.704389002 | 17.28510412 | 15.03256184 |
| ENSMUSG000000044881 | 0.142875015  | 3.166410455  | 0.117759714 | 0.731477078 | 0.999071534 | Coa4          | Coa4          | COA4     | 4.702062247 | 7.52983564  | 5.183656966 | 14.77838869 | 10.98763035 | 5.966497245 | 12.74891282 | 10.1551205  | 8.563983406 | 6.405178521 |
| ENSMUSG000000028081 | -0.094729901 | 11.04833137  | 0.117688611 | 0.731555025 | 0.999071534 | Rps3a1        | Rps3a1        | RPS3A    | 2879.767496 | 2347.885759 | 2067.067366 | 2208.154923 | 1854.162621 | 1973.819156 | 3020.003886 | 1678.910841 | 1402.214788 | 1856.782823 |
| ENSMUSG000000070814 | 0.149070907  | 2.483142011  | 0.117652636 | 0.731594473 | 0.999071534 | G330408A02Rik | G330408A02Rik | C19orf68 | 4.912602348 | 6.640484974 | 3.837252559 | 2.775284262 | 8.960150939 | 8.222124252 | 3.559341141 | 8.773471454 | 3.771295445 | 3.856178906 |
| ENSMUSG000000062554 | -0.277094203 | 3.798584727  | 0.117635602 | 0.731613154 | 0.999071534 | Gm12751       | Gm12751       |          | 27.01931291 | 25.67258923 | 3.500651458 | 7.354503294 | 15.76201734 | 16.00767553 | 36.88771728 | 8.773471454 | 0           | 1.764692042 |
| ENSMUSG000000042029 | 0.100631722  | 4.760704507  | 0.117586414 | 0.731667105 | 0.999071534 | Ncapg2        | Ncapg2        | NCAPG2   | 29.75633422 | 18.32062372 | 22.35031315 | 34.06661432 | 30.21598346 | 50.13312929 | 36.17584905 | 16.99428329 | 18.38506529 | 18.30051006 |
| ENSMUSG000000082480 | -0.196433707 | 0.816802961  | 0.117383459 | 0.73188985  | 0.999071534 | Gm11687       | Gm11687       |          | 2.666841275 | 1.48225111  | 0.740522424 | 1.80393477  | 2.354492217 | 2.255627007 | 1.876743511 | 1.865226215 | 0.785686551 | 0.71894861  |
| ENSMUSG000000030879 | -0.100763969 | 6.405432213  | 0.117308998 | 0.731971626 | 0.999071534 | Mrpl17        | Mrpl17        | MIRPL17  | 139.3073666 | 71.32592342 | 80.98622507 | 87.907129   | 75.73616633 | 105.7961829 | 139.590888  | 49.73936572 | 40.22715141 | 70.45696374 |
| ENSMUSG000000081123 | -0.306829499 | 0.007352736  | 0.117284132 | 0.73199894  | 0.999071534 | Gm11469       | Gm11469       |          | 0.350900168 | 1.541541155 | 0.471241542 | 1.80393477  | 0.719428178 | 1.964578361 | 1.359021163 | 0.552659619 | 0.15713731  | 0           |
| ENSMUSG000000041491 | 0.151787042  | 2.150695547  | 0.117268123 | 0.732016528 | 0.999071534 | Cep78         | Cep78         | CEP78    | 6.246022985 | 2.430891821 | 4.914376085 | 3.538487434 | 4.120361381 | 7.712789121 | 4.400639957 | 2.556050739 | 2.121353688 | 6.013024734 |
| ENSMUSG000000066640 | 0.107065194  | 3.808681392  | 0.117232202 | 0.732055996 | 0.999071534 | Fbxl18        | Fbxl18        | FBXL18   | 18.94860906 | 13.04380977 | 13.86796539 | 13.32136446 | 10.20279961 | 17.89949173 | 8.477703446 | 10.50053276 | 14.61376985 | 17.84299731 |
| ENSMUSG000000042106 | -0.134530354 | 2.299235259  | 0.117132058 | 0.732166063 | 0.999071534 | Fam212a       | Fam212a       | FAM212A  | 5.54422265  | 5.929004441 | 5.92417939  | 4.926129565 | 3.662543449 | 5.093351307 | 6.471529348 | 3.868617334 | 2.592765618 | 4.313691657 |
| ENSMUSG000000021209 | -0.32848975  | -0.338030255 | 0.117081671 | 0.732221463 | 0.999071534 | Ppp4r4        | Ppp4r4        | PPP4R4   | 0.631620302 | 0.711480533 | 0           | 1.110113705 | 1.308051232 | 0.654859454 | 0.323576467 | 1.105319238 | 0           | 0.784307574 |
| ENSMUSG000000083816 | 0.23739721   | -0.150895308 | 0.11707027  | 0.732234    | 0.999071534 | Gm13033       | Gm13033       |          | 0.491260235 | 0.592900444 | 1.077123525 | 0.763203172 | 0.719428178 | 0.436572969 | 0.906014109 | 0.759906976 | 0.549980586 | 1.30717929  |
| ENSMUSG000000056537 | -0.091085305 | 7.301912987  | 0.116998377 | 0.732313073 | 0.999071534 | Rlim          | Rlim          | RLIM     | 101.9715887 | 161.506081  | 221.1469238 | 185.3889887 | 170.6352832 | 159.1308472 | 123.5414953 | 165.1761437 | 138.045127  | 145.9465677 |
| ENSMUSG000000024048 | -0.088183251 | 9.791395452  | 0.116973802 | 0.732340108 | 0.999071534 | Myll12a       | Myll12a       | MYL12A   | 825.2470144 | 829.111981  | 1109.975793 | 898.7758082 | 1076.329956 | 880.3493923 | 997.1332419 | 896.1375725 | 565.6943167 | 832.215695  |
| ENSMUSG000000071078 | 0.09368107   | 5.217772978  | 0.116871423 | 0.732452771 | 0.999071534 | Nr2c2ap       | Nr2c2ap       | NR2C2AP  | 53.05610536 | 23.30098745 | 28.74573409 | 43.50258081 | 37.41026523 | 40.74681045 | 52.67824889 | 23.41895136 | 26.71334273 | 42.87548072 |
| ENSMUSG000000038486 | -0.342044899 | -0.67825054  | 0.116826554 | 0.732502165 | 0.999071534 | Sv2a          | Sv2a          | SV2A     | 0.210540101 | 0.355740266 | 1.144443746 | 1.110113705 | 0           | 0.727621615 | 0.129430587 | 0.483577167 | 0.628549241 | 0.130717929 |
| ENSMUSG000000042377 | 0.086016751  | 4.300415686  | 0.116757311 | 0.732578412 | 0.999071534 | Fam83g        | Fam83g        | FAM83G   | 23.08923104 | 22.94524719 | 14.13724627 | 17.06799821 | 21.64824789 | 28.66829164 | 18.12028217 | 16.92520084 | 17.36367278 | 17.38548456 |
| ENSMUSG000000013539 | 0.10672677   | 4.359065682  | 0.116727147 | 0.732611634 | 0.999071534 | Tango2        | Tango2        | TANGO2   | 29.68615419 | 21.16654585 | 9.492151068 | 22.13289199 | 19.55536592 | 20.37340523 | 33.45780673 | 16.85611838 | 14.45663254 | 17.38548456 |
| ENSMUSG000000022760 | -0.081025593 | 4.570220046  | 0.116667426 | 0.732677424 | 0.999071534 | Thap7         | Thap7         | THAP7    | 25.26481208 | 24.66465847 | 22.28299293 | 26.57334681 | 27.14206306 | 23.79322682 | 19.8028798  | 19.75758138 | 22.3920667  | 24.1174579  |
| ENSMUSG000000017781 | -0.089822722 | 7.850676823  | 0.116581636 | 0.732771967 | 0.999071534 | Pitpna        | Pitpna        | PITPNA   | 277.6322127 | 226.2508095 | 254.6723936 | 227.9896021 | 249.5761751 | 322.6274242 | 296.4607594 | 156.5408371 | 152.5803282 | 176.4692042 |
| ENSMUSG000000039456 | 0.090171944  | 5.000010049  | 0.116569726 | 0.732785095 | 0.999071534 | Morc3         | Morc3         | MORC3    | 36.77433758 | 44.11179304 | 23.89867822 | 27.61407841 | 28.31930917 | 43.8755834  | 43.35924663 | 33.91948413 | 14.22092657 | 27.97363681 |
| ENSMUSG000000036879 | 0.081908585  | 4.514082147  | 0.116502396 | 0.732859326 | 0.999071534 | Phkb          | Phkb          | PHKB     | 25.82625234 | 20.33648523 | 26.99540836 | 18.0393477  | 23.74112986 | 29.83248622 | 24.59181152 | 19.61941648 | 15.00661312 | 25.68607305 |
| ENSMUSG000000029641 | 0.207296622  | 0.558423909  | 0.116502341 | 0.732859386 | 0.999071534 | Rasl11a       | Rasl11a       | RASL11A  | 1.965040939 | 0.889350666 | 1.683005509 | 0.485674746 | 1.504258917 | 1.164194584 | 1.359021163 | 2.210638477 | 1.257098482 | 0.849666539 |
| ENSMUSG000000039253 | -0.135276412 | 2.233712525  | 0.116476308 | 0.732888094 | 0.999071534 | Fn3krp        | Fn3krp        | FN3KRP   | 4.842422314 | 5.454684085 | 4.308494102 | 3.607869541 | 6.736463844 | 5.020589145 | 3.106334087 | 3.592287524 | 3.614158135 | 5.751588876 |

|                     |              |              |             |             |             |               |               |                 |             |             |              |             |             |             |             |             |             |             |
|---------------------|--------------|--------------|-------------|-------------|-------------|---------------|---------------|-----------------|-------------|-------------|--------------|-------------|-------------|-------------|-------------|-------------|-------------|-------------|
| ENSMUSG00000025432  | 0.232477477  | 2.860302432  | 0.116425526 | 0.732944104 | 0.999071534 | Avil          | Avil          | AVIL            | 11.22880537 | 11.73942879 | 4.106533441  | 2.358991623 | 5.035997243 | 1.528005392 | 0.453007054 | 18.23776743 | 6.442629718 | 8.823460208 |
| ENSMUSG00000022807  | -0.083001658 | 4.291684109  | 0.116363716 | 0.733012294 | 0.999071534 | Osbpl11       | Osbpl11       | OSBPL11         | 18.10644865 | 22.70808701 | 23.89867822  | 18.52502245 | 20.66720946 | 26.63095112 | 15.98467749 | 18.23776743 | 15.32088774 | 16.2090232  |
| ENSMUSG00000020691  | 0.124811648  | 3.253025504  | 0.116249201 | 0.733138685 | 0.999071534 | Mettl2        | Mettl2        | METTL28         | 11.57970553 | 11.6208487  | 6.395420932  | 7.493267507 | 9.810384239 | 14.98900527 | 15.59638573 | 6.217420715 | 5.499805857 | 6.601255415 |
| ENSMUSG000000085817 | -0.368294573 | -0.476795188 | 0.116240424 | 0.733148375 | 0.999071534 | Gm12668       | Gm12668       |                 | 1.19306057  | 0           | 0            | 1.526406344 | 0.719428178 | 0.218286485 | 0.19414588  | 0.828989429 | 0.785686551 | 0.326794823 |
| ENSMUSG000000078521 | 0.183709804  | 2.060245169  | 0.116216893 | 0.733174356 | 0.999071534 | Aunip         | Aunip         | AUNIP           | 5.263502516 | 1.304380977 | 7.001302916  | 2.705902155 | 3.400933203 | 7.130691829 | 7.701119924 | 2.141556024 | 2.828471584 | 1.633974113 |
| ENSMUSG000000038160 | 0.080173384  | 5.928056642  | 0.116206627 | 0.733185693 | 0.999071534 | Atg5          | Atg5          | ATG5            | 69.54841324 | 62.55099685 | 57.49146817  | 52.79978308 | 65.07554879 | 67.59604805 | 96.2316414  | 59.47999151 | 33.47024707 | 49.41137717 |
| ENSMUSG000000028211 | -0.121128015 | 3.895133928  | 0.116184334 | 0.73321031  | 0.999071534 | Trp53inp1     | Trp53inp1     | TP53INP1        | 15.01852718 | 17.84630337 | 13.12744297  | 17.27614453 | 16.3506404  | 10.04117829 | 7.571689337 | 25.49142493 | 13.74951464 | 9.411690889 |
| ENSMUSG000000033713 | -0.176936024 | 1.930326401  | 0.116150135 | 0.733248081 | 0.999071534 | Foxn3         | Foxn3         | FOXN3           | 2.245761073 | 5.810424352 | 5.520258068  | 3.607869541 | 3.008517833 | 3.274297269 | 1.359021163 | 6.63191543  | 1.335667137 | 4.182973728 |
| ENSMUSG000000018143 | -0.090323702 | 4.624515094  | 0.11614294  | 0.733256028 | 0.999071534 | Mafk          | Mafk          | MAFK            | 30.80903472 | 33.14313482 | 22.68691426  | 19.49637194 | 25.83401183 | 31.36049162 | 19.67344922 | 31.57068074 | 11.62816095 | 23.13707343 |
| ENSMUSG000000022951 | 0.111130464  | 4.430168362  | 0.116077452 | 0.733328376 | 0.999071534 | Rcan1         | Rcan1         | RCAN1           | 31.72137516 | 26.79910007 | 17.90717861  | 11.86434022 | 19.55536592 | 35.07136185 | 35.46398083 | 14.02373784 | 11.86386692 | 14.96720287 |
| ENSMUSG000000028847 | -0.079025271 | 5.510531591  | 0.116019917 | 0.733391956 | 0.999071534 | Trappc3       | Trappc3       | TRAPPC3         | 51.86304479 | 47.19487535 | 48.94180019  | 40.2416218  | 54.93815174 | 47.95026444 | 62.90326526 | 45.31808877 | 23.17775325 | 37.3853277  |
| ENSMUSG000000039853 | -0.252843043 | 0.980535444  | 0.116016501 | 0.733395732 | 0.999071534 | Trim14        | Trim14        | TRIM14          | 2.035220973 | 4.03172302  | 1.1444433746 | 0.416292639 | 2.812310149 | 4.365729691 | 1.68259763  | 1.4507315   | 0           | 1.30717929  |
| ENSMUSG000000025508 | -0.091409669 | 10.14130823  | 0.115938489 | 0.73348197  | 0.999071534 | Rplp2         | Rplp2         | RPLP2           | 1402.47779  | 963.4632216 | 1239.163296  | 1373.488181 | 1050.88836  | 987.0914832 | 1276.962171 | 871.7514668 | 902.5181411 | 1210.317305 |
| ENSMUSG000000090098 | -0.123102594 | 2.845584648  | 0.115850434 | 0.733579349 | 0.999071534 | Alms1-ps2     | Alms1-ps2     |                 | 6.807463254 | 5.098943819 | 8.145746661  | 7.909560147 | 10.20279961 | 5.602686437 | 6.471529348 | 7.599069763 | 5.421237202 | 7.189486096 |
| ENSMUSG000000052337 | 0.083911518  | 7.026219673  | 0.115832394 | 0.733599304 | 0.999071534 | Immt          | Immt          | IMMT            | 147.4482505 | 127.4143054 | 137.6698506  | 115.243679  | 129.6278771 | 189.6181929 | 164.506276  | 77.09601687 | 103.867762  | 123.7898788 |
| ENSMUSG000000036281 | 0.109185624  | 3.826192559  | 0.115796422 | 0.733639101 | 0.999071534 | Snapc4        | Snapc4        | SNAPC4          | 16.00104765 | 12.1544591  | 16.83005509  | 12.90507182 | 12.29568158 | 17.9722539  | 6.083237587 | 16.09621141 | 12.17814154 | 18.30051006 |
| ENSMUSG000000049285 | -0.188594699 | 0.81862218   | 0.115771564 | 0.733666606 | 0.999071534 | Mblac1        | Mblac1        | MBLAC1          | 2.807201342 | 1.897281421 | 0.942483085  | 1.318260024 | 2.092881971 | 2.910486461 | 1.617882337 | 1.105319238 | 0.785686551 | 1.241820326 |
| ENSMUSG000000025374 | -0.073704322 | 5.779820646  | 0.115764941 | 0.733673935 | 0.999071534 | Nabp2         | Nabp2         | NABP2           | 54.03862583 | 53.12387979 | 69.94570894  | 44.82084083 | 70.83097421 | 55.00819411 | 58.95563236 | 57.96017756 | 32.3702859  | 55.68583776 |
| ENSMUSG000000024260 | -0.086787268 | 4.677496473  | 0.115757076 | 0.733682638 | 0.999071534 | Sap130        | Sap130        | SAP130          | 27.08949295 | 26.14690958 | 25.85096461  | 20.67586775 | 37.01784986 | 35.87174563 | 14.56094103 | 24.6624355  | 18.85647722 | 27.18932923 |
| ENSMUSG000000024234 | 0.082859888  | 4.558187374  | 0.115604044 | 0.733852049 | 0.999071534 | Mtpap         | Mtpap         | MTPAP           | 21.68563036 | 31.72017376 | 20.1960661   | 20.81463196 | 23.87193498 | 23.86598898 | 21.03247038 | 25.90591965 | 18.85647722 | 26.40502166 |
| ENSMUSG000000078190 | 0.147373106  | 2.50968995   | 0.11545684  | 0.734015127 | 0.999071534 | Dnm3os        | Dnm3os        |                 | 5.052962415 | 3.49811262  | 5.92417939   | 8.533999106 | 4.120361381 | 3.638108076 | 3.882917609 | 6.148338263 | 7.228316269 | 6.274460592 |
| ENSMUSG000000073639 | -0.081647862 | 7.0751064    | 0.115414853 | 0.734061663 | 0.999071534 | Rab18         | Rab18         | RAB18           | 124.5695595 | 189.6688521 | 131.5437105  | 113.2315979 | 162.5907681 | 154.4740689 | 160.9469349 | 117.0947568 | 89.4111295  | 117.5154182 |
| ENSMUSG000000052459 | -0.090217381 | 6.553298156  | 0.115413012 | 0.734063703 | 0.999071534 | Atp6v1a       | Atp6v1a       | ATP6V1A         | 100.497808  | 157.533648  | 67.25290012  | 90.89055958 | 86.78919924 | 96.70091266 | 129.4953023 | 91.53424942 | 53.34811681 | 72.74452749 |
| ENSMUSG000000020810 | 0.206171592  | 1.025549412  | 0.115382762 | 0.734097237 | 0.999071534 | Cygb          | Cygb          | CYGB            | 1.473780704 | 0.948640711 | 3.500651458  | 1.873316877 | 1.308051232 | 4.656778337 | 2.588611739 | 0.690824524 | 0.628549241 | 1.960768935 |
| ENSMUSG000000024581 | -0.08180702  | 4.536448953  | 0.115108156 | 0.734401875 | 0.999071534 | Napg          | Napg          | NAPG            | 24.21211157 | 26.50264985 | 23.76403778  | 23.10424148 | 25.63780415 | 23.57494033 | 19.22044216 | 28.04747567 | 18.77790857 | 18.16979213 |
| ENSMUSG000000054720 | 0.0852599    | 5.378510973  | 0.114871278 | 0.734664983 | 0.999071534 | Lrrc8c        | Lrrc8c        | LRRC8C          | 45.6170218  | 53.89465037 | 37.43004251  | 29.48739528 | 43.55810602 | 73.48978314 | 48.92476187 | 26.18224946 | 31.97744262 | 31.96053364 |
| ENSMUSG000000047347 | -0.102801478 | 4.025778151  | 0.114807761 | 0.734735586 | 0.999071534 | Gm5806        | Tdg-ps        |                 | 26.31751258 | 13.2216799  | 22.01371205  | 9.64411281  | 16.28523784 | 19.8640701  | 19.28515746 | 13.40199576 | 9.663944577 | 14.37897219 |
| ENSMUSG000000031840 | 0.128861379  | 2.920420376  | 0.114663091 | 0.734896474 | 0.999071534 | Rab3a         | Rab3a         | RAB3A           | 7.71980369  | 5.929004441 | 6.732022034  | 6.244389589 | 10.39900729 | 5.820972922 | 4.788931717 | 7.391822406 | 7.149747614 | 11.69925465 |
| ENSMUSG000000031711 | -0.078539829 | 5.473615511  | 0.114633271 | 0.73492965  | 0.999071534 | Zfp330        | Zfp330        | ZNF330          | 38.24811828 | 61.60235614 | 44.96990719  | 37.88263018 | 54.28412612 | 58.57354003 | 48.01874776 | 39.86057503 | 21.99922343 | 45.22840344 |
| ENSMUSG000000048280 | -0.185607901 | 1.748141987  | 0.114389716 | 0.735200806 | 0.999071534 | Zfp738        | Zfp738        | ZNF729          | 2.877381375 | 3.260952442 | 4.577774983  | 2.914048475 | 4.185763942 | 3.492583753 | 7.118682283 | 2.486968286 | 0.628549241 | 1.30717929  |
| ENSMUSG000000021496 | 0.09775408   | 4.026075018  | 0.114365001 | 0.735228339 | 0.999071534 | Pcbd2         | Pcbd2         | PCBD2           | 15.15888725 | 12.98451973 | 20.26338632  | 17.9699656  | 14.38856355 | 14.69795663 | 24.33295035 | 15.61263424 | 10.37106247 | 15.88222837 |
| ENSMUSG000000022184 | 0.079465125  | 4.810480025  | 0.114355193 | 0.735239266 | 0.999071534 | Fbxo4         | Fbxo4         | FBXO4           | 29.82651426 | 26.44335981 | 31.03462158  | 25.53261521 | 28.31930917 | 30.70563216 | 37.92316198 | 24.80060041 | 16.26371161 | 30.71871332 |
| ENSMUSG000000075419 | -0.106032959 | 3.828734792  | 0.114335715 | 0.73526097  | 0.999071534 | Dolk          | Dolk          | DOLK            | 13.89564664 | 14.76322106 | 13.80064517  | 21.30030671 | 11.38004572 | 15.1345296  | 16.50239984 | 13.95465538 | 12.17814154 | 7.516280918 |
| ENSMUSG000000092595 | -0.612750897 | -0.204198216 | 0.114260122 | 0.735345216 | 0.999071534 | Gm20427       | Gm20427       |                 | 0           | 1.422961066 | 3.164050356  | 0           | 0           | 0           | 0           | 2.694215643 | 0           | 0           |
| ENSMUSG000000022799 | 0.097681033  | 4.511988649  | 0.114085388 | 0.735540072 | 0.999071534 | Arhgap31      | Arhgap31      | ARHGAP31        | 22.8085109  | 37.1155678  | 19.25358302  | 17.76181928 | 17.13547114 | 41.9837672  | 23.815228   | 19.34308667 | 16.1065743  | 15.94758734 |
| ENSMUSG000000040809 | 0.237597437  | 1.792327555  | 0.114047053 | 0.735582845 | 0.999071534 | Chib3         | Chib3         | CHIA            | 7.018003354 | 1.541541155 | 2.558168373  | 2.567137942 | 2.223687094 | 8.294886414 | 8.477703446 | 1.036236786 | 0.471411931 | 0.588230681 |
| ENSMUSG000000092257 | -0.301190759 | 0.704574857  | 0.114030624 | 0.735601177 | 0.999071534 | Gm2308        | Gm2308        |                 | 0.350900168 | 2.54947191  | 1.077123525  | 2.358991623 | 2.158284533 | 0           | 0.388291761 | 4.283112048 | 0.235705965 | 1.372538255 |
| ENSMUSG000000015189 | 0.070254614  | 5.471627603  | 0.11402992  | 0.735601963 | 0.999071534 | Casd1         | Casd1         | CASD1           | 34.80929664 | 45.06043375 | 48.87447997  | 47.59612509 | 47.22064947 | 49.551032   | 46.07728896 | 44.62726425 | 34.17736497 | 45.16304447 |
| ENSMUSG000000020831 | 0.067405682  | 5.69182171   | 0.113954498 | 0.735686145 | 0.999071534 | 0610010K14Rik | 0610010K14Rik | RNASEK-C17orf49 | 55.51240653 | 42.39238175 | 56.21238399  | 51.75905149 | 55.46137223 | 57.04553463 | 50.80150538 | 52.22633401 | 40.22715141 | 55.09760708 |

|                      |              |              |             |             |             |          |          |          |             |             |             |             |             |             |             |             |             |             |
|----------------------|--------------|--------------|-------------|-------------|-------------|----------|----------|----------|-------------|-------------|-------------|-------------|-------------|-------------|-------------|-------------|-------------|-------------|
| ENSMUSG00000024150   | 0.085580727  | 7.224706852  | 0.113944451 | 0.73569736  | 0.999071534 | Mcfd2    | Mcfd2    | MCFD2    | 171.9410822 | 152.4347042 | 142.7188671 | 144.8004564 | 141.2041305 | 144.2873663 | 225.8563742 | 117.4401691 | 122.8028079 | 130.8486469 |
| ENSMUSG000000021376  | -0.13010649  | 2.336125927  | 0.113816503 | 0.735840247 | 0.999071534 | Tpmt     | Tpmt     | TPMT     | 4.491522147 | 4.921073686 | 4.914376085 | 5.82809695  | 6.474853598 | 5.74821076  | 4.724216424 | 6.148338263 | 2.592765618 | 3.790819941 |
| ENSMUSG000000038534  | 0.121444062  | 3.328759218  | 0.113772328 | 0.7358896   | 0.999071534 | Osbpl7   | Osbpl7   | OSBPL7   | 10.52700503 | 12.27303919 | 7.87646578  | 8.187088573 | 10.59521498 | 12.6606161  | 4.335924663 | 12.36575898 | 6.285492408 | 14.90184391 |
| ENSMUSG000000026083  | 0.136086022  | 8.376690268  | 0.113738244 | 0.735927687 | 0.999071534 | Eif5b    | Eif5b    | EIF5B    | 180.7135864 | 195.9535968 | 525.50164   | 397.7676168 | 331.3947796 | 286.973965  | 108.8511236 | 317.019374  | 437.3131343 | 472.4799544 |
| ENSMUSG000000021706  | -0.088821318 | 4.237357537  | 0.113688285 | 0.735983524 | 0.999071534 | Zfyve16  | Zfyve16  | ZFYVE16  | 25.82625234 | 25.31684896 | 14.33920693 | 16.30479504 | 18.83593774 | 23.13836736 | 20.12645627 | 17.61602536 | 11.86386692 | 16.27438216 |
| ENSMUSG000000026893  | -0.180746465 | 1.047142243  | 0.11364623  | 0.736030538 | 0.999071534 | Gca      | Gca      | GCA      | 2.245761073 | 1.897281421 | 3.096730136 | 0.763203172 | 2.746907587 | 1.528005392 | 1.423736457 | 2.417885834 | 1.728510412 | 1.503256184 |
| ENSMUSG000000078816  | 0.155462898  | 2.797242295  | 0.113622105 | 0.736057512 | 0.999071534 | Prkcg    | Prkcg    | PRKCG    | 4.702062247 | 4.328173242 | 11.17515658 | 5.273040098 | 8.044515076 | 3.638108076 | 3.106334087 | 11.53676955 | 6.992610304 | 8.235229528 |
| ENSMUSG000000025545  | 0.126259734  | 4.29244907   | 0.11348563  | 0.736210164 | 0.999071534 | Clybl    | Clybl    | CLYBL    | 16.00104765 | 27.03626025 | 15.14704958 | 16.02726661 | 22.69468887 | 6.184783729 | 16.04939278 | 33.36682451 | 17.04939816 | 21.89525311 |
| ENSMUSG000000039221  | 0.102941493  | 7.656134049  | 0.113370706 | 0.736338791 | 0.999071534 | Rpl22l1  | Rpl22l1  | RPL22L1  | 243.1738162 | 171.5260985 | 177.5907413 | 275.6551093 | 134.0752513 | 142.9776474 | 278.5993384 | 244.7591288 | 163.3442339 | 163.6588471 |
| ENSMUSG000000035378  | 0.115877523  | 3.067469905  | 0.113351702 | 0.736360067 | 0.999071534 | Shq1     | Shq1     | SHQ1     | 9.965564763 | 10.0200175  | 6.395420932 | 5.689332737 | 9.287163747 | 13.38823772 | 9.513148141 | 6.148338263 | 5.578374512 | 7.97379367  |
| ENSMUSG000000016541  | -0.086837559 | 7.757613783  | 0.113200035 | 0.736529945 | 0.999071534 | Atxn10   | Atxn10   | ATXN10   | 195.5215734 | 253.1091996 | 202.0953015 | 233.4014064 | 272.401669  | 213.4114197 | 205.0180497 | 246.3480252 | 121.3885721 | 235.2269133 |
| ENSMUSG000000047935  | 0.31379633   | -0.262275195 | 0.113161232 | 0.736573427 | 0.999071534 | Gm5607   | Gm5607   |          | 0           | 0.592900444 | 1.346404407 | 0.901967385 | 0.39241537  | 0.145524323 | 0.258861174 | 1.519813953 | 0.942823861 | 0.71894861  |
| ENSMUSG000000002395  | -0.082323785 | 6.535279957  | 0.113124285 | 0.736614838 | 0.999071534 | Use1     | Use1     | USE1     | 113.3407542 | 100.9116556 | 80.04374199 | 106.4321514 | 93.26405284 | 58.57354003 | 98.2378155  | 100.7222156 | 73.85453579 | 95.29337025 |
| ENSMUSG000000037446  | 0.316185209  | 0.559586903  | 0.113103998 | 0.736637579 | 0.999071534 | Tulp1    | Tulp1    | TULP1    | 0.140360067 | 0.592900444 | 1.413724627 | 3.469105327 | 0.523220493 | 0.291048646 | 0.064715293 | 0.621742072 | 4.00700141  | 1.503256184 |
| ENSMUSG000000028073  | -0.152310336 | 2.340892903  | 0.113079388 | 0.736665168 | 0.999071534 | Pear1    | Pear1    | PEAR1    | 7.298723488 | 6.225454663 | 8.818948865 | 2.150845303 | 2.616102464 | 7.276216152 | 4.724216424 | 3.730452429 | 3.8498641   | 3.398666154 |
| ENSMUSG000000030826  | -0.084718219 | 4.875309287  | 0.113061621 | 0.736685089 | 0.999071534 | Bcat2    | Bcat2    | BCAT2    | 38.87973858 | 21.40370603 | 27.87057122 | 29.83430582 | 38.52210878 | 41.91100504 | 32.61650791 | 22.72812684 | 15.08518178 | 28.82330335 |
| ENSMUSG000000047261  | 0.103901654  | 4.047539432  | 0.112959811 | 0.736799272 | 0.999071534 | Gap43    | Gap43    | GAP43    | 16.91338808 | 12.27303919 | 15.01240914 | 20.19019301 | 17.39708138 | 14.5524323  | 23.49165153 | 20.79381817 | 13.27810271 | 9.28097296  |
| ENSMUSG0000000025209 | -0.0938936   | 3.84422012   | 0.112957318 | 0.736802068 | 0.999071534 | Peo1     | Peo1     | C10orf2  | 18.31698875 | 14.05174052 | 13.53136429 | 14.98653501 | 15.43500454 | 19.8640701  | 14.69037162 | 8.980718811 | 11.94243557 | 11.89533154 |
| ENSMUSG000000097033  | 0.161687241  | 1.688988351  | 0.112939645 | 0.736821895 | 0.999071534 | Gm26819  | Gm26819  |          | 3.017741442 | 3.49811262  | 3.029409915 | 3.399723221 | 2.158284533 | 3.638108076 | 2.006174098 | 5.18118393  | 3.221314859 | 1.568615148 |
| ENSMUSG000000051768  | 0.078988863  | 4.830845005  | 0.112931191 | 0.73683138  | 0.999071534 | Xrcc1    | Xrcc1    | XRCC1    | 29.82651426 | 24.4274983  | 29.95749805 | 24.07559097 | 35.12117558 | 41.76548071 | 23.75051271 | 21.13923043 | 27.65616659 | 27.38540613 |
| ENSMUSG000000024430  | -0.284579731 | -0.194718559 | 0.112920765 | 0.736843077 | 0.999071534 | Cabyr    | Cabyr    | CABYR    | 0.561440268 | 0.948640711 | 1.077123525 | 0.624438959 | 0.981038424 | 0.436572969 | 0.19414588  | 0.967154334 | 0           | 1.633974113 |
| ENSMUSG000000022477  | -0.09777504  | 7.131907723  | 0.112679112 | 0.737114381 | 0.999071534 | Aco2     | Aco2     | ACO2     | 188.7842902 | 190.4989127 | 108.8567963 | 106.5015336 | 162.1983528 | 199.2227982 | 204.3061815 | 88.84003378 | 68.66900456 | 115.1624955 |
| ENSMUSG000000015451  | -0.169309707 | 1.269067953  | 0.112639628 | 0.737158739 | 0.999071534 | C4a      | C4a      |          | 3.087921476 | 2.134441599 | 2.086926831 | 2.775284262 | 2.419894779 | 1.964578361 | 0.906014109 | 2.003391119 | 2.514196963 | 2.745076509 |
| ENSMUSG000000078773  | 0.163537564  | 2.840616684  | 0.112583956 | 0.737221301 | 0.999071534 | Rad54b   | Rad54b   | RAD54B   | 10.73754513 | 3.260952442 | 3.635291898 | 8.187088573 | 8.633138131 | 9.168032352 | 13.59021163 | 6.148338263 | 5.499805857 | 1.895409971 |
| ENSMUSG000000049233  | 0.236200579  | 3.406004274  | 0.112533379 | 0.73727815  | 0.999071534 | Apoo-ps  | Apoo-ps  | APOO     | 15.43960738 | 10.90936817 | 10.16535327 | 2.497755836 | 11.51085084 | 8.440410737 | 21.8090539  | 7.460904859 | 0           | 18.69266385 |
| ENSMUSG000000022106  | -0.073667167 | 5.984138652  | 0.112442446 | 0.737380398 | 0.999071534 | Rcbtb2   | Rcbtb2   | RCBTB2   | 83.30369981 | 72.27456413 | 54.12545715 | 68.20261074 | 58.40448751 | 62.57545891 | 78.49965099 | 50.77560251 | 46.04123189 | 60.06488838 |
| ENSMUSG000000036751  | -0.093945372 | 7.926963548  | 0.112380688 | 0.737449866 | 0.999071534 | Cox6b1   | Cox6b1   | COX6B1   | 367.6731957 | 226.6658398 | 240.7371079 | 268.5087523 | 199.4124103 | 230.7288142 | 340.2082978 | 182.3085919 | 176.543768  | 208.3643788 |
| ENSMUSG000000017724  | -0.079462876 | 5.463710208  | 0.112297372 | 0.737543618 | 0.999071534 | Etv4     | Etv4     | ETV4     | 46.66972231 | 38.41994878 | 53.31761451 | 49.60820618 | 46.23961105 | 72.47111288 | 43.94168427 | 25.90591965 | 31.19175607 | 39.4114556  |
| ENSMUSG000000032340  | -0.074163947 | 5.710281918  | 0.112283234 | 0.737559531 | 0.999071534 | Neo1     | Neo1     | NEO1     | 52.42448506 | 57.62992316 | 44.63330609 | 57.79529476 | 65.59876928 | 66.43185347 | 44.97712897 | 65.07567016 | 32.13457994 | 40.91471178 |
| ENSMUSG000000086915  | 0.241209019  | 0.450730924  | 0.112281654 | 0.737561309 | 0.999071534 | Gm16365  | Gm16365  |          | 0.210540101 | 1.956571465 | 0.605881983 | 1.387642131 | 1.700466601 | 0.363810808 | 0.711868228 | 1.657978857 | 1.492804447 | 1.960768935 |
| ENSMUSG000000067212  | -0.087836062 | 4.7022813    | 0.112246266 | 0.737601144 | 0.999071534 | H2-T23   | H2-T23   |          | 21.5452703  | 36.10763704 | 27.33200946 | 24.49188361 | 29.16954247 | 22.41074575 | 16.30825396 | 29.22187736 | 20.19214436 | 32.09125157 |
| ENSMUSG000000032598  | 0.115010978  | 3.145566328  | 0.112240732 | 0.737607374 | 0.999071534 | Nckipsd  | Nckipsd  | NCKIPSD  | 9.825204696 | 8.774926572 | 10.50195437 | 7.493267507 | 6.867268968 | 11.56918368 | 5.177223478 | 9.80970824  | 8.956826681 | 8.169870563 |
| ENSMUSG000000048126  | -0.090054701 | 8.387393134  | 0.112236217 | 0.737612457 | 0.999071534 | Col6a3   | Col6a3   | COL6A3   | 227.6640288 | 437.7383979 | 358.8167744 | 393.5353083 | 368.6742397 | 451.9257852 | 263.3912445 | 326.2764227 | 224.156373  | 328.2980787 |
| ENSMUSG000000030269  | -0.118038638 | 3.734487998  | 0.112229026 | 0.737620553 | 0.999071534 | Mtmr14   | Mtmr14   | MTMR14   | 16.70284798 | 15.83044186 | 12.72352164 | 8.464616999 | 18.051107   | 25.17570789 | 11.64875283 | 8.635306549 | 4.32127603  | 14.90184391 |
| ENSMUSG000000027714  | 0.090751991  | 6.11199332   | 0.112034309 | 0.737839884 | 0.999071534 | Exosc9   | Exosc9   | EXOSC9   | 79.79469814 | 47.31345544 | 82.19798904 | 87.28269004 | 48.33249302 | 71.59796694 | 83.09443683 | 41.38038898 | 74.09024176 | 69.67265616 |
| ENSMUSG000000028850  | -0.154376617 | 2.107423911  | 0.111920449 | 0.737968236 | 0.999071534 | Gpatch3  | Gpatch3  | GPATCH3  | 7.649623656 | 3.201662398 | 6.260780492 | 2.289609516 | 3.597140888 | 7.057929668 | 3.235764674 | 2.694215643 | 2.042785033 | 4.836563373 |
| ENSMUSG000000040653  | 0.101101219  | 4.62510834   | 0.111919028 | 0.737969839 | 0.999071534 | Ppp1r14c | Ppp1r14c | PPP1R14C | 23.72085134 | 27.39200052 | 11.98299922 | 24.42250151 | 35.77520119 | 17.46291877 | 29.96318088 | 30.94893867 | 16.9708295  | 26.20894477 |
| ENSMUSG000000040435  | -0.149153144 | 5.139546088  | 0.11171297  | 0.738202309 | 0.999071534 | Ppp1r15a | Ppp1r15a | PPP1R15A | 32.4231755  | 74.52758582 | 33.59278995 | 20.05142879 | 32.43967055 | 15.4983404  | 12.03704459 | 79.79023251 | 22.54920401 | 26.40502166 |
| ENSMUSG000000047843  | 0.081833379  | 6.344938457  | 0.111712218 | 0.738203157 | 0.999071534 | Bri3     | Bri3     | BRI3     | 65.75869143 | 83.95470288 | 85.56400005 | 94.15151859 | 78.28686623 | 57.70039409 | 79.79395686 | 106.2488118 | 68.98327918 | 83.00588492 |

|                    |              |              |             |             |             |            |            |            |             |             |             |             |             |             |             |             |             |             |
|--------------------|--------------|--------------|-------------|-------------|-------------|------------|------------|------------|-------------|-------------|-------------|-------------|-------------|-------------|-------------|-------------|-------------|-------------|
| ENSMUSG00000026255 | 0.355542192  | -0.143880802 | 0.111696    | 0.738221464 | 0.999071534 | Efhdl      | Efhdl      | EFHD1      | 0           | 0.830060622 | 1.077123525 | 0           | 1.700466601 | 0.436572969 | 0.064715293 | 1.312566595 | 1.492804447 | 0.653589645 |
| ENSMUSG00000028487 | 0.158484721  | 1.950572068  | 0.111678457 | 0.738241268 | 0.999071534 | Bnc2       | Bnc2       | BNC2       | 2.456301174 | 3.379532531 | 5.250977187 | 4.371072713 | 2.746907587 | 5.23887563  | 1.68259763  | 4.006782239 | 5.106962581 | 2.745076509 |
| ENSMUSG00000036833 | -0.101363312 | 3.801179281  | 0.111488181 | 0.738456182 | 0.999071534 | Pnpla7     | Pnpla7     | PNPLA7     | 19.43986929 | 17.54985314 | 7.943786    | 12.90507182 | 16.67765321 | 19.35473496 | 11.51932224 | 10.98410993 | 9.506807267 | 14.24825426 |
| ENSMUSG00000061458 | 0.101131623  | 4.704369679  | 0.111409028 | 0.738545644 | 0.999071534 | Nol10      | Nol10      | NOL10      | 32.2126354  | 28.51851136 | 26.92808814 | 18.31687613 | 24.59136316 | 46.05844824 | 41.48250312 | 13.88557293 | 14.45663254 | 19.28089453 |
| ENSMUSG00000031712 | 0.110673085  | 3.807446996  | 0.111374066 | 0.738585172 | 0.999071534 | Il15       | Il15       | IL15       | 12.00078574 | 15.00038123 | 10.9058757  | 16.85985189 | 14.19235587 | 7.64002696  | 12.16647517 | 19.61941648 | 13.67094599 | 14.31361323 |
| ENSMUSG00000033389 | -0.204831831 | 0.715771899  | 0.111259654 | 0.73871457  | 0.999071534 | Arhgap44   | Arhgap44   | ARHGAP44   | 2.526481208 | 2.490181865 | 2.086926831 | 0.624438959 | 0.719428178 | 1.528005392 | 1.29430587  | 1.4507315   | 1.728510412 | 0.653589645 |
| ENSMUSG00000032640 | -0.071318359 | 6.08572647   | 0.111252826 | 0.738722294 | 0.999071534 | Chsy1      | Chsy1      | CHSY1      | 54.38952599 | 83.59896261 | 77.01433207 | 76.38969931 | 68.21487174 | 82.00295604 | 63.29155702 | 59.54907396 | 58.06223612 | 57.38517084 |
| ENSMUSG00000031555 | -0.083523122 | 7.718745855  | 0.111224736 | 0.738754076 | 0.999071534 | Adam9      | Adam9      | ADAM9      | 191.1704114 | 243.5635024 | 193.4783133 | 239.9927066 | 255.0699902 | 240.8427546 | 223.4619084 | 222.5145792 | 151.4017984 | 155.7504124 |
| ENSMUSG00000061878 | -0.085440955 | 5.509323583  | 0.111181265 | 0.738803269 | 0.999071534 | Sphk1      | Sphk1      | SPHK1      | 70.03967347 | 41.32516095 | 29.01501497 | 55.57506735 | 46.63202642 | 40.01918884 | 41.74136429 | 35.50838053 | 39.04862158 | 54.5093764  |
| ENSMUSG00000042569 | 0.096728984  | 5.091327614  | 0.111170716 | 0.738815208 | 0.999071534 | Dhrs7b     | Dhrs7b     | DHRS7B     | 50.88052432 | 25.4947191  | 27.60129034 | 37.32757332 | 28.97333479 | 40.01918884 | 55.52572181 | 17.61602536 | 26.87048004 | 30.98014918 |
| ENSMUSG00000044103 | -0.149088749 | 2.238948902  | 0.111120412 | 0.738872151 | 0.999071534 | Il1f9      | Il1f9      | IL36G      | 5.684582717 | 4.624623464 | 4.914376085 | 5.689332737 | 4.054958819 | 2.037340523 | 3.688771728 | 3.799534882 | 3.064177549 | 8.039152634 |
| ENSMUSG00000093803 | 0.098743667  | 4.786147942  | 0.111117308 | 0.738875664 | 0.999071534 | Ppp2r3d    | Ppp2r3d    |            | 26.17715251 | 24.07175803 | 31.70782378 | 32.05453323 | 23.02170168 | 22.55627007 | 13.52549634 | 33.91948413 | 25.53481291 | 39.15001974 |
| ENSMUSG00000021972 | 0.095982271  | 4.54129354   | 0.111093257 | 0.738902895 | 0.999071534 | Hmbox1     | Hmbox1     | HMBOX1     | 16.70284798 | 18.14275359 | 26.38952637 | 28.44666369 | 25.89941439 | 24.44808627 | 12.9430587  | 28.39288793 | 23.0991846  | 25.2285603  |
| ENSMUSG00000062458 | 0.269021852  | 0.053134431  | 0.111072544 | 0.738926348 | 0.999071534 | Gm8623     | Gm8623     |            | 1.122880537 | 2.193731643 | 0.336601102 | 0.346910533 | 0.261610246 | 0.291048646 | 1.747312924 | 1.4507315   | 0.474111931 | 0.71894861  |
| ENSMUSG00000041886 | 0.164923032  | 2.62868357   | 0.110991748 | 0.739017858 | 0.999071534 | Macc1      | Macc1      | MACC1      | 3.579181711 | 5.395394041 | 3.635291898 | 4.926129565 | 12.23027902 | 14.91624311 | 7.571689337 | 4.144947144 | 1.492804447 | 5.163358196 |
| ENSMUSG00000033545 | 0.078742396  | 6.046935983  | 0.110919334 | 0.739099904 | 0.999071534 | Znrf1      | Znrf1      | ZNRF1      | 69.89931341 | 65.1597588  | 65.36793395 | 61.88883904 | 71.22338958 | 74.72673988 | 38.31145374 | 66.87181392 | 55.23376453 | 92.15613995 |
| ENSMUSG00000020486 | -0.1063239   | 3.111790872  | 0.110842386 | 0.739187122 | 0.999071534 | 4-Sep      | 4-Sep      | 4-Sep      | 9.404124495 | 10.73149804 | 9.088229746 | 8.533999106 | 8.044515076 | 8.513172898 | 7.895265804 | 6.839162787 | 7.071178959 | 9.150255031 |
| ENSMUSG00000067071 | -0.070100926 | 4.891242881  | 0.110841401 | 0.739188239 | 0.999071534 | Hes6       | Hes6       | HES6       | 33.82677617 | 29.17070185 | 29.41893629 | 30.11183424 | 34.72876021 | 34.63478888 | 28.86302089 | 26.59674417 | 20.8206936  | 29.60761092 |
| ENSMUSG00000084403 | 0.228353136  | 0.346733239  | 0.110786451 | 0.739250543 | 0.999071534 | Rps15a-ps8 | Rps15a-ps8 |            | 1.894860906 | 2.193731643 | 0.538561763 | 0.416292639 | 0.457817931 | 0.9459081   | 1.035444696 | 1.174401691 | 1.571373102 | 1.045743432 |
| ENSMUSG00000079641 | 0.120484632  | 9.954837781  | 0.11071537  | 0.739331163 | 0.999071534 | RpB9       | RpB9       |            | 1009.539782 | 613.5926696 | 1174.064643 | 1415.741884 | 675.346851  | 543.8971574 | 710.5092071 | 952.3706887 | 1364.344696 | 1178.356771 |
| ENSMUSG00000028369 | 0.28157821   | 0.962290339  | 0.110681202 | 0.739369926 | 0.999071534 | Svep1      | Svep1      | SVEP1      | 2.315941107 | 0.652190488 | 2.221567271 | 1.873316877 | 1.373453794 | 3.856394561 | 5.371369359 | 0.898071881 | 0.15713731  | 0           |
| ENSMUSG00000026678 | 0.16806705   | 3.413610037  | 0.110667379 | 0.73938561  | 0.999071534 | Rgs5       | Rgs5       | RG55       | 13.75528657 | 11.97658897 | 13.93528561 | 3.538487434 | 6.698540692 | 18.77263767 | 25.04481858 | 3.385040167 | 4.871256616 | 4.313691657 |
| ENSMUSG00000020387 | -0.106002235 | 4.659618799  | 0.110593851 | 0.739469055 | 0.999071534 | Phf15      | Jade2      | JADE2      | 37.61649798 | 29.76360229 | 17.36861685 | 27.96098894 | 22.69468887 | 49.551032   | 16.17882337 | 12.15851162 | 15.79229967 | 28.8886231  |
| ENSMUSG00000027435 | -0.103024641 | 5.810532615  | 0.110580878 | 0.739483781 | 0.999071534 | Cd93       | Cd93       | CD93       | 63.09185015 | 86.32630466 | 54.79865936 | 34.62167117 | 64.42152317 | 118.3112746 | 64.19757113 | 35.43929808 | 25.22053829 | 34.11737947 |
| ENSMUSG00000034343 | 0.078955695  | 5.911427655  | 0.110530912 | 0.739540508 | 0.999071534 | Ube2f      | Ube2f      | UBE2F-SCLY | 77.408577   | 48.97357668 | 54.52937848 | 59.80737585 | 62.85186169 | 69.63338858 | 87.17150032 | 44.90359406 | 33.54881573 | 68.10404101 |
| ENSMUSG00000021000 | 0.081115306  | 5.29316196   | 0.110515834 | 0.739557628 | 0.999071534 | Ctage5     | Ctage5     | CTAGE6     | 37.82703808 | 52.41239926 | 33.25618885 | 26.36520049 | 48.5287007  | 57.33658328 | 50.47792891 | 27.77114586 | 29.07040239 | 33.3330719  |
| ENSMUSG00000041712 | 0.081207944  | 5.249162645  | 0.110466715 | 0.739613412 | 0.999071534 | Ubr7       | Ubr7       | UBR7       | 42.17820016 | 44.40824326 | 38.97840758 | 30.04245214 | 36.23301912 | 55.2264806  | 55.97872886 | 32.53783508 | 21.05639957 | 28.75794438 |
| ENSMUSG00000049823 | -0.121604165 | 3.281573676  | 0.110447712 | 0.739634996 | 0.999071534 | Zbtb12     | Zbtb12     | ZBTB12     | 11.0884453  | 12.33232924 | 11.71371834 | 5.064893778 | 12.0994739  | 12.95166475 | 8.995425794 | 11.88218181 | 3.78452169  | 8.56202435  |
| ENSMUSG00000078922 | 0.166842615  | 4.168114372  | 0.110391433 | 0.739698934 | 0.999071534 | Tgtp1      | Tgtp1      |            | 33.19515587 | 17.19411288 | 7.674505119 | 5.203657991 | 25.50699902 | 17.60844309 | 3.624056435 | 35.30113317 | 11.31388633 | 23.07171447 |
| ENSMUSG00000082163 | 0.235712154  | 0.41169071   | 0.110361418 | 0.739733041 | 0.999071534 | Gm14276    | Gm14276    |            | 1.473780704 | 0.889350666 | 0.740522424 | 1.734552664 | 0.850233301 | 2.037340523 | 1.68259763  | 1.036236786 | 1.492804447 | 0.065358965 |
| ENSMUSG00000031976 | -0.095271523 | 4.300568461  | 0.110276711 | 0.739829324 | 0.999071534 | Urb2       | Urb2       | URB2       | 23.93139144 | 23.06382727 | 17.43593707 | 18.17811192 | 22.69468887 | 37.76356183 | 17.14955277 | 12.43484143 | 9.663944577 | 19.1501766  |
| ENSMUSG00000033632 | -0.136872651 | 2.308482086  | 0.11024343  | 0.739867164 | 0.999071534 | AW554918   | AW554918   | KIAA1328   | 5.54422265  | 5.929004441 | 5.587578288 | 5.064893778 | 4.054958819 | 8.367648575 | 6.147952881 | 3.246875263 | 2.199922343 | 3.202589261 |
| ENSMUSG00000038155 | -0.336117391 | 1.846796141  | 0.110211615 | 0.739903344 | 0.999071534 | Gstp2      | Gstp2      | GSTP1      | 14.59744698 | 2.193731643 | 0           | 0.485674746 | 3.204725518 | 5.384399953 | 2.523896446 | 6.770080335 | 0           | 0.915025503 |
| ENSMUSG00000056271 | 0.223168354  | 0.752838103  | 0.110209842 | 0.73990536  | 0.999071534 | Lman1l     | Lman1l     | LMAN1L     | 0.98252047  | 2.01586151  | 0.942483085 | 1.942698983 | 1.504258917 | 0.436572969 | 0.970729402 | 4.006782239 | 0.549980586 | 1.960768935 |
| ENSMUSG00000036667 | -0.083767864 | 5.531370151  | 0.110177181 | 0.739942507 | 0.999071534 | Fam115a    | Tcaf1      | TCAF1      | 34.66893657 | 48.43996628 | 50.22088437 | 50.09388093 | 62.72105657 | 47.44092931 | 27.8275762  | 62.86503168 | 36.29871866 | 40.84935282 |
| ENSMUSG00000023089 | 0.102530596  | 6.878234543  | 0.110133299 | 0.739992427 | 0.999071534 | Ndufa5     | Ndufa5     | NDUFA5     | 127.8680211 | 63.08460725 | 157.4619954 | 146.3268627 | 89.73231451 | 99.24758832 | 108.0745401 | 84.97141644 | 156.8230356 | 118.8225975 |
| ENSMUSG00000040482 | 0.087415742  | 4.470672228  | 0.110094975 | 0.740036034 | 0.999071534 | Dxo        | Dxo        | DXO        | 23.15941107 | 18.49849386 | 26.52416681 | 22.41042042 | 20.14398897 | 22.04693494 | 14.30207986 | 21.96821986 | 23.25632191 | 26.40502166 |
| ENSMUSG00000083708 | -0.228547273 | 0.469714849  | 0.110044764 | 0.740093179 | 0.999071534 | Gm13123    | Gm13123    |            | 2.526481208 | 0.415030311 | 2.558168373 | 0.416292639 | 1.177246109 | 1.164194584 | 0.453007054 | 1.174401691 | 1.257098482 | 1.437897219 |
| ENSMUSG00000004661 | 0.187734872  | 0.838990365  | 0.110029869 | 0.740110133 | 0.999071534 | Arid3b     | Arid3b     | ARID3B     | 1.473780704 | 1.600831199 | 1.077123525 | 1.80393477  | 2.092881971 | 2.110102684 | 1.617882337 | 0.621742072 | 2.592765618 | 1.437897219 |

|                     |              |              |             |             |             |               |               |            |             |             |             |             |             |              |             |             |             |             |
|---------------------|--------------|--------------|-------------|-------------|-------------|---------------|---------------|------------|-------------|-------------|-------------|-------------|-------------|--------------|-------------|-------------|-------------|-------------|
| ENSMUSG00000009863  | 0.091444174  | 7.150387997  | 0.11000758  | 0.740135506 | 0.999071534 | Sdhh          | Sdhh          | SDHB       | 201.6974164 | 84.54760332 | 150.1914116 | 150.9060817 | 125.311308  | 160.9499013  | 178.61421   | 96.7845158  | 136.002342  | 132.8094159 |
| ENSMUSG000000025157 | 0.072156211  | 5.143858838  | 0.110004022 | 0.740139557 | 0.999071534 | Zdhhc16       | Zdhhc16       | ZDHHC16    | 44.3537812  | 29.05212176 | 34.33331237 | 33.23402904 | 37.60647292 | 39.21880506  | 42.51794782 | 30.1890317  | 26.39906811 | 36.99317391 |
| ENSMUSG000000028792 | 0.080392117  | 6.543485023  | 0.109978152 | 0.740169011 | 0.999071534 | Ak2           | Ak2           | AK2        | 109.8317525 | 66.46413978 | 125.6195312 | 73.82256137 | 95.48773993 | 125.6602529  | 114.8049306 | 64.24668073 | 69.21898514 | 95.88160093 |
| ENSMUSG000000031988 | -0.074724627 | 5.239655789  | 0.10958688  | 0.740614958 | 0.999071534 | Vps26b        | Vps26b        | VPS26B     | 39.93243909 | 47.6691957  | 36.21827854 | 32.05453323 | 45.38937775 | 56.09962653  | 32.87536909 | 39.86057503 | 21.44924284 | 31.76445675 |
| ENSMUSG000000021339 | 0.154250746  | 2.84331687   | 0.109567971 | 0.740636531 | 0.999071534 | Mrs2          | Mrs2          | MRS2       | 12.21132584 | 9.249246928 | 3.90457278  | 3.330341114 | 6.278645913 | 14.11585934  | 11.38989165 | 3.17779281  | 4.32127603  | 4.509768551 |
| ENSMUSG00000003444  | 0.087293736  | 5.269994926  | 0.109554507 | 0.740651895 | 0.999071534 | Med29         | Med29         | MED29      | 41.54657986 | 25.02039874 | 42.41173882 | 47.17983245 | 36.49462937 | 30.41458352  | 31.83992439 | 38.61709089 | 45.80552592 | 38.88858388 |
| ENSMUSG000000042423 | -0.086178704 | 4.845531116  | 0.10954216  | 0.740665983 | 0.999071534 | Fbrs          | Fbrs          | FBR5       | 30.10723439 | 35.45544656 | 26.05292527 | 24.70002993 | 37.27946011 | 41.76548071  | 15.07866338 | 33.02141224 | 18.14935933 | 29.01938024 |
| ENSMUSG000000030324 | 0.377123139  | -0.603103121 | 0.109519212 | 0.740692172 | 0.999071534 | Rho           | Rho           | RHO        | 0           | 0.592900444 | 0.06732022  | 1.387642131 | 0.261610246 | 0.218286485  | 0           | 1.312566595 | 0.31427462  | 0.980384468 |
| ENSMUSG000000031488 | -0.113827768 | 3.798566203  | 0.109456883 | 0.740763316 | 0.999071534 | Rab11fip1     | Rab11fip1     | RAB11FIP1  | 12.3516859  | 20.45506532 | 13.86796539 | 11.44804758 | 16.48144552 | 16.88082147  | 7.44225875  | 21.89913741 | 5.971217787 | 13.00643394 |
| ENSMUSG000000034783 | 0.417885041  | -0.831410497 | 0.109419787 | 0.740805669 | 0.999071534 | Cd207         | Cd207         | CD207      | 1.684320805 | 0.177870133 | 0           | 0           | 0.065402562 | 0.291048646  | 0.711868228 | 0.345412262 | 0           | 1.045743432 |
| ENSMUSG000000025572 | -0.075208138 | 5.140442784  | 0.109342462 | 0.740893979 | 0.999071534 | Tmc6          | Tmc6          | TMC6       | 36.42343741 | 39.30929944 | 41.53657595 | 36.07869541 | 33.61691666 | 28.66829164  | 28.53944442 | 33.57407186 | 32.05601128 | 39.80360938 |
| ENSMUSG000000059060 | 0.285573534  | -0.187677819 | 0.109290735 | 0.740953073 | 0.999071534 | Rad51b        | Rad51b        | RAD51B     | 1.052700503 | 0.474320355 | 0.807842644 | 0.416292639 | 0.719428178 | 1.600767553  | 1.553167044 | 0.898071881 | 0           | 0.130717929 |
| ENSMUSG000000021514 | -0.132079424 | 3.028463273  | 0.109257916 | 0.740990574 | 0.999071534 | Zfp369        | Zfp369        | ZNF274     | 6.73728322  | 5.988294485 | 11.2424768  | 11.30928337 | 7.979112515 | 5.893735083  | 3.559341141 | 8.289894287 | 8.32827744  | 9.934562605 |
| ENSMUSG000000000171 | 0.131776975  | 6.311316891  | 0.109251778 | 0.740997589 | 0.999071534 | Sdhd          | Sdhd          | AP002884.2 | 129.2716218 | 88.81648652 | 39.98821088 | 63.5540096  | 73.44707667 | 104.4137018  | 191.8161299 | 38.27167863 | 39.59860217 | 38.43107113 |
| ENSMUSG000000038014 | -0.084968115 | 7.923642529  | 0.109226951 | 0.741025963 | 0.999071534 | Fam120a       | Fam120a       | FAM120A    | 216.5755835 | 213.9777703 | 288.1978633 | 254.632331  | 323.2194594 | 314.1870135  | 179.5202241 | 235.9856574 | 182.0435739 | 238.4295025 |
| ENSMUSG000000059146 | -0.195332747 | 0.559663167  | 0.108988139 | 0.741299079 | 0.999071534 | Ntrk3         | Ntrk3         | NTRK3      | 1.19306057  | 0.830060622 | 1.95228639  | 2.22022741  | 1.177246109 | 0.1018670261 | 0.776583522 | 1.312566595 | 1.257098482 | 1.568615148 |
| ENSMUSG000000021318 | -0.094995992 | 4.727525113  | 0.108965581 | 0.741324894 | 0.999071534 | Gli3          | Gli3          | GLI3       | 23.58049127 | 19.38784452 | 35.34311568 | 34.20537853 | 28.05768992 | 33.97992943  | 11.84289871 | 27.49481605 | 23.02061594 | 27.18932923 |
| ENSMUSG000000005813 | -0.083235501 | 6.01621535   | 0.108873149 | 0.741430705 | 0.999071534 | Metap1        | Metap1        | METAP1     | 99.86618773 | 60.95016565 | 66.10845638 | 64.38659488 | 54.08791844 | 101.5032153  | 73.90486515 | 36.40645241 | 43.05562299 | 57.25445291 |
| ENSMUSG000000062995 | -0.227402458 | 0.455614429  | 0.108768759 | 0.741550263 | 0.999071534 | Ica1          | Ica1          | ICA1       | 1.333420637 | 0.652190488 | 1.279084186 | 0.693821065 | 3.008517833 | 3.128772945  | 1.164875283 | 0.552659619 | 0.31427462  | 0.784307574 |
| ENSMUSG000000031918 | 0.087180079  | 5.67409808   | 0.108692885 | 0.741637203 | 0.999071534 | Mttr2         | Mttr2         | MTMR2      | 70.25021358 | 61.24661587 | 38.57448626 | 38.99274388 | 48.65950583 | 72.10730207  | 80.18224862 | 42.00213106 | 32.52742321 | 32.48340536 |
| ENSMUSG000000025228 | -0.077998709 | 6.291135585  | 0.108572106 | 0.741775665 | 0.999071534 | Actr1a        | Actr1a        | ACTR1A     | 85.68982095 | 93.26323985 | 74.18688282 | 78.12425197 | 86.06977106 | 123.2591016  | 95.00205083 | 61.89787734 | 38.34150369 | 62.94068282 |
| ENSMUSG000000023892 | 0.113450355  | 3.7139461    | 0.108564946 | 0.741783877 | 0.999071534 | Zfp51         | Zfp51         |            | 9.965564763 | 15.3561215  | 11.78103856 | 15.12529923 | 12.29568158 | 7.421740475  | 18.44385864 | 18.30684988 | 10.68537709 | 8.954178137 |
| ENSMUSG000000019935 | 0.284340143  | 0.238243396  | 0.108506603 | 0.741850795 | 0.999071534 | Slc17a8       | Slc17a8       | SLC17A8    | 1.122880537 | 0.237160178 | 1.615685288 | 1.179495811 | 0.719428178 | 0.145524323  | 0.19414588  | 0.828989429 | 0.549980586 | 3.725460977 |
| ENSMUSG000000021156 | 0.076975597  | 6.372160508  | 0.108468586 | 0.74189441  | 0.999071534 | Zmynd11       | Zmynd11       | ZMYND11    | 64.91653103 | 79.27078937 | 93.03654451 | 72.71244766 | 108.6336548 | 92.69899378  | 59.21449353 | 106.2488118 | 69.76896573 | 81.04511599 |
| ENSMUSG000000015127 | 0.098765428  | 3.952539619  | 0.10842959  | 0.741939158 | 0.999071534 | Unkl          | Unkl          | UNKL       | 11.2989854  | 17.60914319 | 14.27188671 | 13.87642131 | 20.01318385 | 15.93491337  | 9.836724609 | 19.96482874 | 10.92104306 | 20.0652021  |
| ENSMUSG000000027809 | -0.070976013 | 5.40786811   | 0.108406903 | 0.741965194 | 0.999071534 | Etfdh         | Etfdh         | ETFDH      | 42.59928036 | 49.74434726 | 43.08494102 | 41.62926393 | 48.2016879  | 47.00435634  | 40.83535019 | 27.97839322 | 40.85570065 | 41.76437832 |
| ENSMUSG000000050064 | 0.122132248  | 2.724922671  | 0.108357846 | 0.742021506 | 0.999071534 | Zfp697        | Zfp697        | ZNF697     | 4.912602348 | 6.166164618 | 5.116336746 | 8.04832436  | 7.848307392 | 11.20537287  | 5.889091707 | 4.835771668 | 4.32127603  | 7.385562989 |
| ENSMUSG000000035392 | -0.095048428 | 4.074367539  | 0.108319485 | 0.742065549 | 0.999071534 | Dennd1a       | Dennd1a       | DENND1A    | 17.61518842 | 18.37991377 | 15.5509709  | 15.40282765 | 22.95629912 | 22.62903223  | 9.448432848 | 21.41556024 | 9.742513232 | 16.33974113 |
| ENSMUSG000000009739 | -0.115536092 | 4.177083095  | 0.108159951 | 0.742248809 | 0.999071534 | Pou6f1        | Pou6f1        | POU6F1     | 12.84294614 | 20.27719519 | 17.16665619 | 26.64272891 | 19.29375567 | 12.87890259  | 6.730390522 | 23.76436362 | 15.71373102 | 22.35276586 |
| ENSMUSG000000097488 | -0.166552344 | 1.39879889   | 0.108105143 | 0.742311803 | 0.999071534 | 4732487G21Rik | 4732487G21Rik |            | 4.140621979 | 1.956571465 | 2.490848153 | 2.567137942 | 2.616102464 | 3.201535107  | 1.876743511 | 0.967154334 | 1.571373102 | 3.986896835 |
| ENSMUSG000000052794 | -0.131029915 | 2.471689053  | 0.108101679 | 0.742315785 | 0.999071534 | 1700030K09Rik | 1700030K09Rik | C19orf44   | 3.930081878 | 7.826285862 | 5.049016526 | 5.273040098 | 7.325086899 | 7.130691829  | 4.918362304 | 5.043019025 | 2.121353688 | 6.470537486 |
| ENSMUSG000000066442 | -0.11624837  | 4.276973439  | 0.108001667 | 0.742430781 | 0.999071534 | Mthfs         | Mthfs         | MTHF5      | 20.84366996 | 9.486407105 | 25.04312197 | 29.41801318 | 18.18191212 | 10.76879991  | 25.62725622 | 20.65565327 | 11.78529826 | 19.54233039 |
| ENSMUSG000000013465 | -0.072511061 | 5.361869971  | 0.107979608 | 0.742456153 | 0.999071534 | Nelfb         | Nelfb         | NELF8      | 42.03784009 | 55.19903134 | 37.09344141 | 32.60959008 | 52.25664672 | 51.95218333  | 40.12348196 | 42.76203803 | 24.59198905 | 36.99317391 |
| ENSMUSG000000041153 | 0.118297519  | 3.156981057  | 0.107977771 | 0.742458266 | 0.999071534 | Osgin2        | Osgin2        | OSGIN2     | 10.456825   | 8.952796705 | 12.11763966 | 5.273040098 | 7.128879214 | 9.240794513  | 10.74273872 | 5.595678644 | 9.978219197 | 8.039152634 |
| ENSMUSG000000023991 | -0.083057866 | 5.075425762  | 0.107932218 | 0.742510669 | 0.999071534 | Foxp4         | Foxp4         | FOXP4      | 41.89748002 | 31.60159367 | 43.48886234 | 25.32446889 | 37.8026806  | 51.87942117  | 18.57328923 | 34.40306129 | 27.10618601 | 28.30043163 |
| ENSMUSG000000082481 | -0.249632135 | -0.134506152 | 0.107874896 | 0.742576629 | 0.999071534 | Rps12-ps19    | Rps12-ps19    |            | 1.614140771 | 0.474320355 | 0.471241542 | 1.040731598 | 0.784830739 | 0.363810808  | 1.164875283 | 1.243484143 | 0.235705965 | 0.392153787 |
| ENSMUSG000000032280 | -0.092327351 | 4.751763104  | 0.107781284 | 0.74268439  | 0.999071534 | Tle3          | Tle3          | TLE3       | 33.82677617 | 36.22621713 | 25.31240285 | 23.45115201 | 25.24538878 | 54.49885898  | 17.27898336 | 23.211704   | 16.65655488 | 19.67304832 |
| ENSMUSG000000000416 | 0.314651161  | -0.436415432 | 0.107700043 | 0.742777953 | 0.999071534 | Cttnbp2       | Cttnbp2       | CTTNBP2    | 0.070180034 | 1.719411288 | 0.605881983 | 0           | 0.39241537  | 0.363810808  | 0.906014109 | 0.483577167 | 0.392843275 | 1.045743432 |
| ENSMUSG000000044018 | 0.089904293  | 5.181614722  | 0.107663043 | 0.742820577 | 0.999071534 | Mrp150        | Mrp150        | MRPL50     | 48.49440318 | 30.35650274 | 31.84246422 | 37.39695543 | 33.81312435 | 35.94450779  | 65.81545347 | 25.90591965 | 24.51342039 | 29.0847392  |

|                     |              |              |             |             |             |               |               |          |             |             |             |             |             |             |             |             |             |             |
|---------------------|--------------|--------------|-------------|-------------|-------------|---------------|---------------|----------|-------------|-------------|-------------|-------------|-------------|-------------|-------------|-------------|-------------|-------------|
| ENSMUSG00000033722  | 0.355781184  | -0.321282091 | 0.107632844 | 0.742855373 | 0.999071534 | BC034090      | BC034090      | KIAA1614 | 0.350900168 | 0.118580089 | 2.221567271 | 0           | 0.327012808 | 0.363810808 | 1.29430587  | 0.552659619 | 0           | 1.437897219 |
| ENSMUSG00000030699  | 0.411178058  | -0.371268495 | 0.107619892 | 0.742870298 | 0.999071534 | Tbx6          | Tbx6          | TBX6     | 0           | 0.889350666 | 0.06732022  | 0.624438959 | 1.308051232 | 0.218286485 | 0           | 2.279720929 | 0.864255206 | 0           |
| ENSMUSG00000044231  | -0.261587838 | -0.130909321 | 0.107578163 | 0.74291839  | 0.999071534 | Nhlrc1        | Nhlrc1        | NHLRC1   | 1.263240604 | 0.889350666 | 0.942483085 | 0.693821065 | 0.654025616 | 0.9459081   | 0.582437641 | 0.828989429 | 1.021392516 | 0           |
| ENSMUSG00000025423  | 0.06997143   | 5.437873264  | 0.107503977 | 0.743003916 | 0.999071534 | Pias2         | Pias2         | PIAS2    | 46.10828204 | 49.62576717 | 39.31500868 | 34.82981749 | 49.9021545  | 53.91676169 | 51.96638066 | 42.27846087 | 26.32049946 | 42.87548072 |
| ENSMUSG00000024186  | 0.174634636  | 1.622826979  | 0.107430799 | 0.74308831  | 0.999071534 | Rgs11         | Rgs11         | RGS11    | 3.649361744 | 2.371601776 | 2.558168373 | 2.150845303 | 3.727946011 | 1.45524323  | 1.29430587  | 6.079255811 | 2.121353688 | 3.790819941 |
| ENSMUSG00000020732  | -0.287298934 | -0.306421299 | 0.107416195 | 0.743105156 | 0.999071534 | Rab37         | Rab37         | RAB37    | 0.631620302 | 0.948640711 | 0.134640441 | 1.734552664 | 0.327012808 | 0.873145938 | 0.064715293 | 0.414494714 | 0.392843275 | 1.241820326 |
| ENSMUSG00000029191  | 0.075423076  | 5.34152046   | 0.10740235  | 0.743121128 | 0.999071534 | Rfc1          | Rfc1          | RFC1     | 47.16098254 | 36.40408727 | 38.03592449 | 36.21745962 | 47.02444179 | 71.45244261 | 36.24056435 | 30.87985622 | 34.72734555 | 31.96053364 |
| ENSMUSG00000057411  | -0.085026136 | 5.177379604  | 0.107391944 | 0.743133134 | 0.999071534 | Fam173a       | Fam173a       | FAM173A  | 28.98435385 | 30.83082309 | 41.33461529 | 50.92646621 | 39.24153696 | 30.48734568 | 24.7859574  | 37.71901901 | 37.32011117 | 34.90168705 |
| ENSMUSG00000075302  | 0.171873992  | 1.490349038  | 0.107298325 | 0.743241171 | 0.999071534 | Erich2        | Erich2        | ERIC2    | 2.877381375 | 2.253021687 | 2.692808814 | 2.636520049 | 2.616102464 | 0.727621615 | 2.135604685 | 4.006782239 | 2.592765618 | 3.725460977 |
| ENSMUSG00000024513  | 0.08504861   | 6.828162355  | 0.107286685 | 0.743254607 | 0.999071534 | Mbd2          | Mbd2          | MBD2     | 80.91757867 | 102.0381664 | 148.8450072 | 100.6734366 | 139.5690664 | 95.82776672 | 92.93116144 | 151.3596532 | 97.89654425 | 118.2343668 |
| ENSMUSG00000006288  | -0.072227924 | 4.825068954  | 0.107265149 | 0.743279469 | 0.999071534 | Ttc5          | Ttc5          | TTC5     | 32.49335553 | 26.02832949 | 32.91958775 | 26.71211102 | 32.17806031 | 28.15895651 | 25.8214021  | 25.9750021  | 21.60638015 | 31.17622607 |
| ENSMUSG000000041199 | 0.114248024  | 3.274585286  | 0.107217658 | 0.743334304 | 0.999071534 | Rpusd1        | Rpusd1        | RPUSD1   | 8.702324159 | 10.07930755 | 7.472544458 | 5.82809695  | 15.89282247 | 12.07851881 | 6.471529348 | 10.08603805 | 8.17114013  | 11.30710086 |
| ENSMUSG00000026848  | -0.082980872 | 5.432652591  | 0.107132401 | 0.743432777 | 0.999071534 | Tor1b         | Tor1b         | TOR1B    | 59.93374864 | 46.00907446 | 38.91108736 | 42.60061342 | 42.96948297 | 64.39451295 | 57.01417356 | 26.59674417 | 21.5278115  | 39.67289145 |
| ENSMUSG00000058290  | 0.104320172  | 4.753841015  | 0.106925587 | 0.743671832 | 0.999071534 | Espl1         | Espl1         | ESPL1    | 36.07253724 | 12.98451973 | 30.49605981 | 28.72419211 | 25.89941439 | 56.97277247 | 23.16807507 | 14.507315   | 21.60638015 | 23.72530412 |
| ENSMUSG00000024902  | -0.08873721  | 5.543397422  | 0.106763091 | 0.74385984  | 0.999071534 | Mrpl11        | Mrpl11        | MRPL11   | 66.7412119  | 35.39615651 | 48.20127776 | 60.70934323 | 36.75623962 | 49.551032   | 67.30390522 | 26.52766172 | 38.26293503 | 36.53566116 |
| ENSMUSG00000034773  | -0.129155267 | 2.969039441  | 0.106684138 | 0.743951246 | 0.999071534 | BC030867      | BC030867      | C17orf53 | 13.82546661 | 8.122736084 | 8.280387102 | 4.232308499 | 7.652099707 | 13.2427134  | 9.124856381 | 4.835771668 | 4.792687961 | 4.836536373 |
| ENSMUSG00000050288  | 0.078252837  | 5.074194208  | 0.106668671 | 0.743969157 | 0.999071534 | Fzd2          | Fzd2          | FZD2     | 36.35325737 | 28.10348105 | 32.71762709 | 32.95650061 | 39.5031472  | 54.20781033 | 40.96478077 | 22.38271458 | 27.34189197 | 25.29391926 |
| ENSMUSG000000081473 | 0.532472198  | 0.030717954  | 0.10665321  | 0.743987063 | 0.999071534 | Gm4853        | Gm4853        |          | 3.859901845 | 0           | 0           | 0           | 0           | 0           | 0.711868228 | 2.348803381 | 0           | 1.960768935 |
| ENSMUSG00000071477  | -0.093872845 | 3.821276125  | 0.106570771 | 0.744082559 | 0.999071534 | Zfp777        | Zfp777        | ZNF777   | 15.43960738 | 17.43127306 | 14.13724627 | 12.83568971 | 15.36960198 | 21.10102684 | 8.477703446 | 12.22759407 | 9.899650542 | 15.16327977 |
| ENSMUSG00000056121  | -0.066812246 | 5.668288313  | 0.106526519 | 0.744133837 | 0.999071534 | Fez2          | Fez2          | FEZ2     | 50.45944412 | 54.36897072 | 52.57709209 | 57.93405897 | 53.56469795 | 69.56062642 | 38.24673845 | 45.45625368 | 36.9272679  | 52.87540228 |
| ENSMUSG00000085399  | -0.111923179 | 3.477535551  | 0.106506167 | 0.744157425 | 0.999071534 | 9130206124Rik | Foxd2os       |          | 14.24654681 | 11.02794826 | 10.16535327 | 14.01518552 | 9.679579116 | 8.440410737 | 8.024696391 | 7.875399573 | 13.90665195 | 11.11102397 |
| ENSMUSG00000025504  | -0.160411162 | 2.955766421  | 0.106444967 | 0.744228369 | 0.999071534 | Eps8l2        | Eps8l2        | EPS8L2   | 4.631882214 | 12.74735955 | 5.587578288 | 5.064893778 | 14.06155074 | 4.365729691 | 2.718042326 | 14.507315   | 4.32127603  | 8.300588492 |
| ENSMUSG00000040390  | -0.087696082 | 3.995555659  | 0.10634426  | 0.744345159 | 0.999071534 | Map3k10       | Map3k10       | MAP3K10  | 19.43986929 | 19.32855448 | 13.80064517 | 13.32136446 | 19.09754799 | 22.70179439 | 13.26663516 | 14.92180972 | 9.978219197 | 14.90184391 |
| ENSMUSG00000085622  | 0.15541605   | 2.017596066  | 0.10629525  | 0.744402018 | 0.999071534 | 3110056K07Rik | 3110056K07Rik |          | 3.017741442 | 1.897281421 | 5.520258068 | 5.61995063  | 3.008517833 | 2.910486461 | 2.9769035   | 5.388431287 | 4.714119306 | 3.33330719  |
| ENSMUSG00000063931  | -0.068645973 | 5.513845482  | 0.106290644 | 0.744407362 | 0.999071534 | Pepd          | Pepd          | PEPD     | 54.74042616 | 48.2028061  | 43.690823   | 46.34724717 | 49.44433657 | 60.97469136 | 50.34849833 | 38.8934207  | 25.77051887 | 43.92122415 |
| ENSMUSG00000078866  | 0.178241773  | 2.178390337  | 0.106115662 | 0.744610492 | 0.999071534 | Gm14420       | Gm14420       | ZNF788   | 6.877643287 | 6.99622524  | 1.346404407 | 2.428373729 | 3.924153696 | 4.147443207 | 8.542418739 | 1.934308667 | 1.492804447 | 6.862691273 |
| ENSMUSG00000024646  | 0.07659238   | 6.55411442   | 0.106050941 | 0.744685671 | 0.999071534 | Cyb5          | Cyb5a         | CYB5A    | 75.37335602 | 92.01814892 | 95.79667355 | 104.0731598 | 105.8213447 | 73.34425881 | 105.6800743 | 108.5285327 | 69.76896573 | 103.7900356 |
| ENSMUSG00000000282  | -0.094233833 | 4.449978373  | 0.10604556  | 0.744691922 | 0.999071534 | Mnt           | Mnt           | MNT      | 21.40491023 | 33.85461536 | 17.30129663 | 16.23541293 | 28.31930917 | 27.35857273 | 13.00777399 | 28.66921774 | 13.67094599 | 20.13056107 |
| ENSMUSG00000029206  | 0.261520675  | 0.001737955  | 0.106024685 | 0.744716177 | 0.999071534 | Nsun7         | Nsun7         | NSUN7    | 0.561440268 | 0.177870133 | 0.269280881 | 1.734552664 | 1.308051232 | 0.654859454 | 0.970729402 | 0.345412262 | 0.628549241 | 1.960768935 |
| ENSMUSG00000026632  | -0.142990617 | 2.071515127  | 0.106000764 | 0.744743973 | 0.999071534 | Tatdn3        | Tatdn3        | TATDN3   | 4.491522147 | 5.751134307 | 4.914376085 | 2.428373729 | 4.708984435 | 3.856394561 | 5.75966112  | 4.490359406 | 2.592765618 | 2.0261279   |
| ENSMUSG00000040133  | 0.141126403  | 3.427680469  | 0.105896822 | 0.744864795 | 0.999071534 | Gpr176        | Gpr176        | GPRI76   | 11.0884453  | 15.53399163 | 9.82875217  | 8.395234892 | 7.717502268 | 29.32315109 | 12.49005164 | 8.013564478 | 4.32127603  | 4.117614764 |
| ENSMUSG00000008763  | -0.075559022 | 6.129026517  | 0.105871292 | 0.744894482 | 0.999071534 | Man1a2        | Man1a2        | MAN1A2   | 75.72425619 | 92.96678963 | 58.16467038 | 68.68828548 | 77.24042524 | 108.3428585 | 80.44110979 | 50.01569553 | 47.61260499 | 51.17606921 |
| ENSMUSG00000030822  | 0.085979163  | 4.844843007  | 0.105861913 | 0.744905388 | 0.999071534 | Prr14         | Prr14         | PRR14    | 26.80877281 | 22.8266671  | 33.86207083 | 26.15705417 | 34.53255252 | 25.68504302 | 18.24971276 | 31.29435093 | 23.88487115 | 41.82973728 |
| ENSMUSG00000021975  | -0.093765956 | 3.74372222   | 0.105861904 | 0.744905398 | 0.999071534 | Ints9         | Ints9         | INTS9    | 16.21158775 | 14.88180115 | 13.32940363 | 11.23990126 | 15.69661478 | 21.10102684 | 9.319002261 | 9.671543335 | 9.663944577 | 13.79074151 |
| ENSMUSG00000017929  | -0.08990439  | 4.544168608  | 0.105769886 | 0.745012435 | 0.999071534 | B4galt5       | B4galt5       | B4GALT5  | 30.17741442 | 25.55400914 | 19.92678522 | 20.25957511 | 28.84252966 | 36.81765373 | 28.92773619 | 18.09960253 | 10.13535651 | 19.01945867 |
| ENSMUSG00000009633  | -0.108077656 | 3.61133034   | 0.105758812 | 0.74502532  | 0.999071534 | G0s2          | G0s2          | G0S2     | 14.17636678 | 11.56155866 | 19.99410544 | 10.12978756 | 9.287163747 | 10.98708639 | 15.46695514 | 9.187966168 | 6.206923753 | 14.90184391 |
| ENSMUSG00000059552  | -0.087878966 | 6.915087574  | 0.105743856 | 0.745042722 | 0.999071534 | Trp53         | Trp53         | TP53     | 113.2003941 | 80.69375044 | 180.3508703 | 116.6313211 | 154.0230326 | 177.6851984 | 75.78160866 | 110.5319238 | 79.04006703 | 134.7701848 |
| ENSMUSG00000019851  | -0.14183152  | 4.825859532  | 0.105733829 | 0.745054391 | 0.999071534 | Perp          | Perp          | PERP     | 19.22932919 | 19.92145492 | 39.92089066 | 50.78770199 | 21.64824789 | 41.83824288 | 21.55019273 | 4.90485412  | 39.59860217 | 20.39199693 |
| ENSMUSG00000041617  | 0.205604101  | 0.513199675  | 0.105672798 | 0.745125424 | 0.999071534 | Ccdc74a       | Ccdc74a       | CCDC74A  | 0.631620302 | 0.652190488 | 2.356207712 | 1.387642131 | 1.177246109 | 1.309718907 | 0.906014109 | 2.486968286 | 0.707117896 | 1.30717929  |

|                     |              |              |             |             |             |           |           |               |             |             |             |             |             |             |             |             |             |             |
|---------------------|--------------|--------------|-------------|-------------|-------------|-----------|-----------|---------------|-------------|-------------|-------------|-------------|-------------|-------------|-------------|-------------|-------------|-------------|
| ENSMUSG00000086925  | -0.294157252 | -0.342993459 | 0.105652567 | 0.745148976 | 0.999071534 | Gm6286    | Gm6286    |               | 0.842160403 | 0.830060622 | 1.346400407 | 0.138764213 | 0.588623054 | 1.018670261 | 0.647152935 | 1.105319238 | 0.15713731  | 0           |
| ENSMUSG000000028126 | 0.066860143  | 5.777915332  | 0.10563321  | 0.745171512 | 0.999071534 | Pip5k1a   | Pip5k1a   | PIP5K1A       | 55.30186643 | 66.46413978 | 53.99081671 | 49.05314933 | 53.10688002 | 60.3198319  | 55.46100651 | 66.87181392 | 41.48424989 | 46.86237755 |
| ENSMUSG000000024042 | -0.106572209 | 5.574587112  | 0.105585741 | 0.745226789 | 0.999071534 | Sik1      | Sik1      | CH507-42P11.8 | 42.52910033 | 67.17562031 | 47.12415424 | 40.44976812 | 59.38552593 | 42.20205368 | 16.50239984 | 82.1390359  | 26.9490487  | 52.87540228 |
| ENSMUSG000000019880 | -0.188652658 | 0.913469389  | 0.105534552 | 0.745286411 | 0.999071534 | Rspo3     | Rspo3     | RSPO3         | 0.771980369 | 1.778701332 | 2.962089695 | 1.179495811 | 3.008517833 | 1.45524323  | 0.841298815 | 2.556050739 | 1.099961171 | 1.895409971 |
| ENSMUSG000000067203 | -0.162473395 | 2.37923325   | 0.105436758 | 0.745400363 | 0.999071534 | H2-K2     | H2-K2     |               | 9.755024662 | 6.403324796 | 4.308494102 | 2.497755836 | 5.101399804 | 6.403070214 | 4.206494076 | 6.63191543  | 0.707117896 | 6.013024734 |
| ENSMUSG000000026584 | 0.083064481  | 4.318384394  | 0.105377667 | 0.745469246 | 0.999071534 | Scyl3     | Scyl3     | SCYL3         | 20.28202969 | 15.53399163 | 23.09083558 | 20.05142879 | 20.86341715 | 19.93683226 | 15.79053161 | 18.99767441 | 17.12796681 | 26.07822684 |
| ENSMUSG000000021125 | -0.231128199 | 0.817635653  | 0.105375139 | 0.745472192 | 0.999071534 | Arg2      | Arg2      | ARG2          | 1.965040939 | 5.51397413  | 0.201960661 | 0.763203172 | 0.719428178 | 1.382481069 | 1.229590576 | 1.865226215 | 1.178529826 | 1.503256184 |
| ENSMUSG000000036052 | -0.133897001 | 2.434774161  | 0.105261159 | 0.74560512  | 0.999071534 | Dnajb5    | Dnajb5    | DNAJB5        | 5.052962415 | 3.735272798 | 6.462741153 | 7.354503294 | 5.886230544 | 8.804221544 | 4.594785837 | 3.315957715 | 2.278490998 | 6.339819557 |
| ENSMUSG000000004843 | 0.076217596  | 5.87916644   | 0.105234049 | 0.745636749 | 0.999071534 | Chmp2b    | Chmp2b    | CHMP2B        | 50.10854395 | 69.428642   | 61.32872073 | 66.81496861 | 47.94007765 | 51.29732387 | 62.19139703 | 76.54335725 | 51.54103774 | 45.68591619 |
| ENSMUSG000000024096 | 0.102572594  | 7.306445475  | 0.105138701 | 0.745748025 | 0.999071534 | Ralbp1    | Ralbp1    | RALBP1        | 107.3052713 | 116.0899069 | 205.8652338 | 186.4297203 | 172.0741396 | 144.6511771 | 82.44728389 | 150.0470866 | 193.4360289 | 198.5605342 |
| ENSMUSG000000031201 | 0.072077743  | 5.283735892  | 0.105118871 | 0.745771175 | 0.999071534 | Brcc3     | Brcc3     | BRCC3         | 35.65145704 | 39.60574966 | 35.27579546 | 38.02139439 | 48.13628533 | 41.0378591  | 53.32540183 | 39.10066805 | 27.57759794 | 32.02589261 |
| ENSMUSG000000003354 | -0.281312142 | -0.112050188 | 0.105058284 | 0.74584192  | 0.999071534 | Ccdc65    | Ccdc65    | CCDC65        | 0.912340436 | 0.889350666 | 1.211763966 | 0           | 1.569661478 | 0.291048646 | 0.19414588  | 0.967154334 | 0.864255206 | 0.980384468 |
| ENSMUSG000000024793 | 0.236454574  | -0.078770389 | 0.105028907 | 0.74587623  | 0.999071534 | Tnfrsf25  | Tnfrsf25  | TNFRSF25      | 1.052700503 | 0.5336104   | 0.605881983 | 0.416292639 | 1.308051232 | 0.9459081   | 0.19414588  | 1.312566595 | 0.628549241 | 1.176461361 |
| ENSMUSG000000037761 | 0.120412935  | 2.853432454  | 0.10499829  | 0.745911993 | 0.999071534 | Actr5     | Actr5     | ACTR5         | 8.772504193 | 6.759065062 | 7.943786    | 3.954780073 | 8.109917638 | 11.05984855 | 6.018522294 | 4.697606763 | 7.542590889 | 6.666614379 |
| ENSMUSG000000028772 | 0.078683688  | 5.166275722  | 0.104955626 | 0.74596184  | 0.999071534 | Zcchc17   | Zcchc17   | ZCCHC17       | 41.68693992 | 23.3602775  | 46.3163116  | 38.29892282 | 30.54299627 | 39.43709155 | 39.02332197 | 27.90931077 | 28.20614718 | 43.52907036 |
| ENSMUSG000000034220 | -0.084214998 | 8.430312882  | 0.104943405 | 0.74597612  | 0.999071534 | Gpc1      | Gpc1      | GPC1          | 411.6760768 | 429.6749518 | 263.2220615 | 323.4593807 | 420.5384711 | 440.2110772 | 373.536674  | 306.7260886 | 201.5286003 | 328.2327197 |
| ENSMUSG000000053134 | 0.101316982  | 3.608586101  | 0.104940447 | 0.745979577 | 0.999071534 | Supt7l    | Supt7l    | SUPT7L        | 12.21132584 | 12.33232924 | 10.09803305 | 9.435966491 | 16.61225065 | 11.71470801 | 9.124856381 | 11.95126426 | 14.84947581 | 11.24174189 |
| ENSMUSG000000046380 | -0.150848615 | 2.43318434   | 0.104934343 | 0.745986709 | 0.999071534 | Jrk       | Jrk       | JRK           | 6.807463254 | 8.893506661 | 3.567971678 | 2.705902155 | 7.063476652 | 9.968416129 | 6.471529348 | 1.934308667 | 3.299883514 | 3.529384083 |
| ENSMUSG000000071176 | 0.126843607  | 3.314692148  | 0.10492263  | 0.746000397 | 0.999071534 | Arhgef10  | Arhgef10  | ARHGEF10      | 5.123142449 | 13.2216799  | 9.290190407 | 6.730064335 | 14.58477124 | 9.386318836 | 5.177223478 | 16.09621141 | 8.563983406 | 9.673126747 |
| ENSMUSG000000034801 | 0.082833402  | 4.507098702  | 0.104897873 | 0.746029332 | 0.999071534 | Sos2      | Sos2      | SOS2          | 21.3347302  | 25.19826887 | 24.5045602  | 17.20676242 | 26.09562208 | 24.59361059 | 17.79670571 | 29.15279491 | 22.23492939 | 17.38548456 |
| ENSMUSG000000017639 | 0.269849045  | -0.243692532 | 0.104841814 | 0.746094864 | 0.999071534 | Rab11fip4 | Rab11fip4 | RAB11FIP4     | 0.631620302 | 0.770770577 | 0.605881983 | 0           | 1.373453794 | 1.164194584 | 1.035444696 | 0.898071881 | 0.471411931 | 0.261435858 |
| ENSMUSG000000042770 | 0.078451695  | 5.476651918  | 0.104801751 | 0.74614171  | 0.999071534 | Hebp1     | Hebp1     | HEBP1         | 59.23194831 | 42.15522157 | 38.97840758 | 41.2823534  | 43.03488553 | 49.98760497 | 70.28080872 | 35.23205072 | 26.9490487  | 40.91471178 |
| ENSMUSG000000095334 | 0.535050754  | -1.289008527 | 0.104773733 | 0.746174898 | 0.999071534 | Gm21984   | Gm21984   |               | 0           | 0           | 0           | 1.040731598 | 0.065402562 | 0.072762162 | 0           | 0           | 0.078568655 | 1.437897219 |
| ENSMUSG000000034591 | 0.075707906  | 5.410236747  | 0.104639862 | 0.746331106 | 0.999071534 | Slc41a2   | Slc41a2   | SLC41A2       | 35.1601968  | 49.56647712 | 44.96990719 | 36.0093133  | 48.98651864 | 39.50985371 | 36.88771728 | 60.58531075 | 31.89887397 | 39.99968628 |
| ENSMUSG000000043008 | 0.119256563  | 3.270506413  | 0.104454898 | 0.746547696 | 0.999071534 | Klhl6     | Klhl6     | KLHL6         | 14.10618674 | 8.597056439 | 8.482347763 | 8.325852786 | 7.979112515 | 17.82672957 | 12.10175988 | 5.043019025 | 8.406846095 | 5.882306805 |
| ENSMUSG000000031907 | 0.103807959  | 3.763509918  | 0.104449935 | 0.746553511 | 0.999071534 | Zfp90     | Zfp90     | ZFP90         | 10.2462849  | 13.04380977 | 15.01240914 | 16.09664872 | 12.55729183 | 10.98708639 | 8.477703446 | 19.34308667 | 11.07818037 | 16.47045906 |
| ENSMUSG000000002280 | -0.085832492 | 4.472974052  | 0.104389419 | 0.746624422 | 0.999071534 | Narfl     | Narfl     | NARFL         | 32.49335553 | 16.4233423  | 22.61959403 | 22.13289199 | 24.59136316 | 27.72238354 | 26.72741621 | 15.26722198 | 12.49241616 | 23.46386826 |
| ENSMUSG000000070583 | -0.278133036 | 0.657170339  | 0.104319117 | 0.746706829 | 0.999071534 | Fv1       | Fv1       |               | 3.859901845 | 1.067220799 | 0           | 1.873316877 | 1.438856355 | 2.692199976 | 1.941458804 | 0.828989429 | 1.021392516 | 0.065358965 |
| ENSMUSG000000079334 | 0.12961572   | 3.98268637   | 0.104318141 | 0.746707972 | 0.999071534 | Nat6      | Nat6      | NAT6          | 11.22880537 | 22.70808701 | 13.86796539 | 10.68484441 | 19.62076848 | 7.421740475 | 9.642578728 | 31.7779281  | 9.271101302 | 19.47697142 |
| ENSMUSG000000058173 | 0.112851518  | 3.468069655  | 0.104191241 | 0.746856801 | 0.999071534 | Smco4     | Smco4     | SMCO4         | 14.03600671 | 7.055515284 | 9.963392611 | 11.17051915 | 12.36108414 | 17.24463228 | 15.14337867 | 5.18118393  | 8.956826681 | 9.542408818 |
| ENSMUSG000000039354 | 0.078113278  | 4.240767477  | 0.104057    | 0.747014348 | 0.999071534 | Smarcal1  | Smarcal1  | SMARCAL1      | 18.73806896 | 17.90559341 | 18.10913927 | 18.73316877 | 21.32123508 | 20.2278809  | 18.12028217 | 18.03052007 | 17.6779474  | 18.49658695 |
| ENSMUSG000000049115 | 0.40209036   | -0.732835616 | 0.103936407 | 0.747155973 | 0.999071534 | Agtr1a    | Agtr1a    | AGTR1         | 0.070180034 | 0.296450222 | 1.481044848 | 0           | 0.196207685 | 1.8918162   | 0.453007054 | 0           | 0           | 0.522871716 |
| ENSMUSG000000031197 | 0.092035599  | 6.830787785  | 0.103929541 | 0.747164039 | 0.999071534 | Vbp1      | Vbp1      | VBP1          | 129.9032421 | 106.3070496 | 100.2398081 | 123.083857  | 111.2497573 | 103.0312207 | 208.7068215 | 117.8546638 | 68.35472994 | 71.6334251  |
| ENSMUSG000000020832 | 0.110805999  | 3.617552097  | 0.103821788 | 0.747290666 | 0.999071534 | Eral1     | Eral1     | ERAL1         | 16.70284798 | 12.92522968 | 12.65620142 | 4.371072713 | 14.6501738  | 15.93491337 | 14.81980221 | 12.64208879 | 6.521198373 | 12.28748533 |
| ENSMUSG000000087381 | -0.23920598  | -0.092873685 | 0.103813741 | 0.747300125 | 0.999071534 | Gm16008   | Gm16008   |               | 0.421080201 | 0.889350666 | 1.548365068 | 0.693821065 | 0.981038424 | 0.509335131 | 0.19414588  | 0.967154334 | 1.099961171 | 0.653589645 |
| ENSMUSG000000005566 | -0.085449481 | 7.673364632  | 0.103766299 | 0.747355903 | 0.999071534 | Trim28    | Trim28    | TRIM28        | 250.8936199 | 218.1873634 | 213.6070591 | 186.221574  | 224.1999812 | 370.723213  | 164.8298525 | 150.7379111 | 135.53093   | 171.1097691 |
| ENSMUSG000000032293 | 0.06568542   | 5.810802574  | 0.103735456 | 0.747392172 | 0.999071534 | Ireb2     | Ireb2     | IREB2         | 49.61728371 | 52.70884948 | 58.63591192 | 67.99446442 | 53.89171076 | 64.83108592 | 58.04961825 | 58.72008453 | 42.19136779 | 54.3132995  |
| ENSMUSG000000062524 | -0.199862885 | 1.147099553  | 0.103657555 | 0.747483806 | 0.999071534 | Ncr1      | Ncr1      | NCR1          | 5.684582717 | 2.075151554 | 1.279084186 | 0.763203172 | 1.896674286 | 2.837724299 | 1.941458804 | 0.552659619 | 1.021392516 | 3.267948225 |
| ENSMUSG000000036022 | 0.107059758  | 3.172063087  | 0.103609561 | 0.747540278 | 0.999071534 | Fam122b   | Fam122b   | FAM122B       | 7.93034379  | 6.699775018 | 10.70391503 | 9.64411281  | 9.287163747 | 9.822891806 | 8.412988152 | 10.1551205  | 8.956826681 | 6.731973344 |

|                    |              |             |             |             |             |          |          |               |             |             |             |             |             |             |             |             |             |              |
|--------------------|--------------|-------------|-------------|-------------|-------------|----------|----------|---------------|-------------|-------------|-------------|-------------|-------------|-------------|-------------|-------------|-------------|--------------|
| ENSMUSG00000059810 | -0.083795007 | 4.379439267 | 0.103518882 | 0.747647018 | 0.999071534 | Rgs3     | Rgs3     | RGS3          | 24.0717515  | 21.7594463  | 26.99540836 | 18.87193298 | 18.9013403  | 33.10678349 | 20.25588686 | 12.98750105 | 13.1209654  | 20.58807382  |
| ENSMUSG00000020737 | -0.09144103  | 7.955217607 | 0.103503032 | 0.74766568  | 0.999071534 | Hn1      | Hn1      | HN1           | 351.8826882 | 171.6446786 | 273.3874148 | 272.6716787 | 258.3401183 | 345.2564564 | 284.229569  | 140.790038  | 178.1151141 | 235.4883491  |
| ENSMUSG00000021546 | 0.083555641  | 9.345547266 | 0.103476639 | 0.74769676  | 0.999071534 | Hnrnpk   | Hnrnpk   | HNRNPK        | 643.7614477 | 639.9767393 | 636.6473238 | 611.1175945 | 751.2138225 | 858.8845546 | 899.6072947 | 513.0753739 | 456.2481802 | 558.6230696  |
| ENSMUSG00000020086 | 0.216851672  | 0.417045786 | 0.10344896  | 0.747729359 | 0.999071534 | H2afy2   | H2afy2   | H2AFY2        | 2.035220973 | 0.592900444 | 1.144443746 | 1.387642131 | 0.588623054 | 1.673529715 | 2.588611739 | 1.243484143 | 0.392843275 | 0.5228771716 |
| ENSMUSG00000025324 | -0.089797392 | 4.427650135 | 0.103348375 | 0.747847863 | 0.999071534 | Atp10a   | Atp10a   | ATP10A        | 24.14193154 | 18.37991377 | 23.02351536 | 26.98963945 | 21.58284533 | 38.70946993 | 23.42693624 | 13.12566595 | 12.88525944 | 16.14366423  |
| ENSMUSG00000048787 | 0.083752036  | 4.036374653 | 0.103306917 | 0.747896726 | 0.999071534 | Dcun1d3  | Dcun1d3  | DCUN1D3       | 15.22906728 | 19.26926443 | 18.04181905 | 15.61097397 | 13.7999405  | 22.1196971  | 13.20191987 | 16.64887103 | 14.14235792 | 15.5935666   |
| ENSMUSG00000055204 | 0.129305212  | 7.554965075 | 0.103301816 | 0.747902738 | 0.999071534 | Ankrd17  | Ankrd17  | ANKRD17       | 104.1471698 | 128.2443661 | 281.7351221 | 250.8856973 | 157.5547709 | 147.1250906 | 59.21449353 | 181.6868498 | 252.5196575 | 270.8475489  |
| ENSMUSG00000094649 | -0.327079086 | 0.112274586 | 0.103292954 | 0.747913184 | 0.999071534 | Gm7102   | Gm7102   | MPLKIP        | 0           | 2.01586151  | 1.750325729 | 1.318260024 | 0.39241537  | 0.654859454 | 0.323576467 | 0.828989429 | 1.964216377 | 0            |
| ENSMUSG00000041629 | 0.072280387  | 5.973686293 | 0.103249441 | 0.747964483 | 0.999071534 | Fam104a  | Fam104a  | FAM104A       | 75.23299596 | 60.06081498 | 61.59800161 | 60.98687166 | 59.71253874 | 61.26574    | 90.14840382 | 57.96017756 | 38.73434696 | 64.50929797  |
| ENSMUSG00000078440 | 0.077717181  | 5.773472946 | 0.103193716 | 0.748030198 | 0.999071534 | Dohh     | Dohh     | DOHH          | 76.77695669 | 46.48339482 | 52.91369319 | 45.72280822 | 54.74194406 | 73.12597233 | 78.82322746 | 33.85040167 | 37.55581714 | 52.4832485   |
| ENSMUSG00000069376 | -0.198670684 | 0.525812195 | 0.10310801  | 0.748131306 | 0.999071534 | Gm5507   | Gm5507   |               | 0.491260235 | 2.312311732 | 1.346404407 | 1.734552664 | 1.308051232 | 0.9459081   | 0.647152935 | 1.381649048 | 1.099961171 | 1.699333077  |
| ENSMUSG00000022905 | 0.085259854  | 4.93235667  | 0.103087571 | 0.748155426 | 0.999071534 | Kpna1    | Kpna1    | KPNA1         | 32.07227533 | 38.41994878 | 34.53527304 | 19.77390037 | 29.10413991 | 47.80474012 | 39.02332197 | 29.22187736 | 21.99922343 | 16.66653595  |
| ENSMUSG00000086158 | 0.184844515  | 1.698657834 | 0.103068643 | 0.748177764 | 0.999071534 | Gm5918   | Ccpg1os  | C1SorF65      | 1.122880537 | 1.837991377 | 3.635291898 | 5.550568524 | 2.746907587 | 1.382481069 | 1.941458804 | 5.941090906 | 1.807079067 | 4.64048648   |
| ENSMUSG00000047344 | -0.255777015 | 0.031272261 | 0.10306066  | 0.748187186 | 0.999071534 | LancIb   | LancIb   | LANCL3        | 1.403600671 | 1.304380977 | 0.538561763 | 1.318260024 | 0.39241537  | 1.018670261 | 1.553167044 | 0.552659619 | 0           | 0.915025503  |
| ENSMUSG00000078238 | -0.096454104 | 7.426909476 | 0.103008096 | 0.748249234 | 0.999071534 | Gm12854  | Gm12854  |               | 153.4837334 | 141.8810763 | 240.6697877 | 171.0268926 | 215.1744277 | 151.7091068 | 182.8207041 | 229.9064016 | 64.7405718  | 183.7240492  |
| ENSMUSG00000031967 | -0.069085438 | 6.048294157 | 0.102963856 | 0.74830147  | 0.999071534 | Afg3l1   | Afg3l1   |               | 73.05741492 | 67.11633027 | 69.67642805 | 65.77423701 | 75.80156889 | 88.55155057 | 78.62908158 | 43.31469765 | 46.98405575 | 59.4766577   |
| ENSMUSG00000054568 | 0.233558008  | 0.838464683 | 0.102896619 | 0.748380884 | 0.999071534 | Usp17la  | Usp17la  | USP17L27      | 1.122880537 | 1.304380977 | 3.837252559 | 1.040731598 | 0.654025616 | 0.873145938 | 0.258861174 | 1.934308667 | 3.771295445 | 1.176461361  |
| ENSMUSG00000033953 | -0.073934544 | 7.228019681 | 0.102884729 | 0.748394931 | 0.999071534 | Ppp3r1   | Ppp3r1   | RP11-474G23.1 | 147.4482505 | 192.8705145 | 156.9234336 | 127.9406045 | 174.690242  | 178.6311065 | 138.7495892 | 134.8489471 | 120.1314736 | 136.1427231  |
| ENSMUSG00000022706 | 0.084254679  | 5.143473368 | 0.102832048 | 0.748457177 | 0.999071534 | Mrpl40   | Mrpl40   | MRPL40        | 39.37099882 | 34.80325607 | 32.04442488 | 28.16913526 | 43.88511883 | 34.34374024 | 60.05579235 | 29.36004227 | 18.5422026  | 34.90168705  |
| ENSMUSG00000093409 | -0.245743102 | 0.306045099 | 0.102746983 | 0.748557723 | 0.999071534 | Gm25193  | Gm25193  |               | 1.263240604 | 0.355740266 | 2.154247051 | 2.01208109  | 0.39241537  | 0.800383777 | 0.258861174 | 0.483577167 | 1.649941757 | 1.503256184  |
| ENSMUSG00000045969 | 0.066371758  | 5.683591316 | 0.102728872 | 0.748579136 | 0.999071534 | Ing1     | Ing1     | ING1          | 43.79234093 | 45.29759393 | 56.01042332 | 56.40765262 | 57.88126701 | 59.66497245 | 52.87239477 | 51.46642703 | 45.96266323 | 43.00619864  |
| ENSMUSG00000052298 | -0.09411072  | 5.282269138 | 0.102657103 | 0.74866401  | 0.999071534 | Cdc42se2 | Cdc42se2 | CDCA2SE2      | 49.26638355 | 52.41239926 | 40.19017154 | 28.5854279  | 38.52210878 | 64.32175079 | 57.72604178 | 23.55711627 | 16.02800564 | 28.1697137   |
| ENSMUSG00000021661 | 0.089944756  | 4.447992249 | 0.102639782 | 0.748684499 | 0.999071534 | Ankra2   | Ankra2   | ANKRA2        | 17.96608859 | 17.07553279 | 23.42743668 | 25.25508678 | 24.98377853 | 15.4983404  | 17.34369865 | 25.90591965 | 22.78490998 | 23.59458619  |
| ENSMUSG00000086740 | 0.215993032  | 0.990576475 | 0.10253902  | 0.748803728 | 0.999071534 | Gm17029  | Gm17029  |               | 4.35116208  | 0.592900444 | 2.760129034 | 0.693821065 | 0.654025616 | 1.164194584 | 1.294305087 | 1.657978857 | 3.378452169 | 1.633974113  |
| ENSMUSG00000018537 | -0.097508709 | 5.143339698 | 0.10251343  | 0.748834018 | 0.999071534 | Pcgf2    | Pcgf2    | PCGF2         | 28.14219345 | 39.36858949 | 39.92089066 | 33.9278501  | 47.80927253 | 27.14028625 | 16.43768454 | 58.02926001 | 24.04200846 | 36.73173805  |
| ENSMUSG00000026895 | 0.085690771  | 7.046319712 | 0.102504079 | 0.748845086 | 0.999071534 | Ndufa8   | Ndufa8   | NDUFA8        | 152.781933  | 79.74510973 | 146.8927208 | 142.8577574 | 141.7927535 | 109.0704801 | 182.0441206 | 112.5353149 | 111.0175097 | 135.7505693  |
| ENSMUSG00000026672 | 0.143926304  | 2.7935553   | 0.102489615 | 0.748862209 | 0.999071534 | Optn     | Optn     | OPTN          | 8.000523824 | 10.73149804 | 2.760129034 | 4.926129565 | 7.325086899 | 4.729540499 | 4.853647011 | 13.19474841 | 4.399844685 | 6.862691273  |
| ENSMUSG00000026005 | 0.084602999  | 5.396052703 | 0.10246109  | 0.748895983 | 0.999071534 | Rpe      | Rpe      | RPEL1         | 42.45892029 | 46.24623464 | 34.33331237 | 44.89022294 | 43.4273009  | 48.45959957 | 72.86942046 | 27.84022831 | 32.92026649 | 28.1697137   |
| ENSMUSG00000031848 | 0.096686054  | 6.378796805 | 0.102415568 | 0.748949891 | 0.999071534 | Lsm4     | Lsm4     | LSM4          | 129.0610817 | 70.14012253 | 79.63982066 | 71.32480553 | 67.88785894 | 115.9101233 | 151.7573632 | 44.90359406 | 50.9124885  | 62.15637524  |
| ENSMUSG00000068417 | -0.163945184 | 1.394730888 | 0.102356577 | 0.749019769 | 0.999071534 | Pnp2     | Pnp2     | PNP           | 3.087921476 | 1.600831199 | 3.500651458 | 2.914048475 | 2.550699902 | 3.710870238 | 2.912188207 | 1.588896405 | 0.628549241 | 3.006512367  |
| ENSMUSG00000015314 | -0.206846859 | 0.793203257 | 0.102355706 | 0.749020801 | 0.999071534 | Slamf6   | Slamf6   | SLAMF6        | 2.456301174 | 1.837991377 | 1.548365068 | 1.248877918 | 1.896674286 | 1.164194584 | 1.294305087 | 0.345412262 | 3.221314859 | 0.71894861   |
| ENSMUSG00000081494 | 0.189127701  | 0.976733236 | 0.102353945 | 0.749022888 | 0.999071534 | Gm14130  | Gm14130  |               | 1.263240604 | 3.023792265 | 2.423527932 | 0.971349492 | 1.24264867  | 0.9459081   | 0.841298815 | 2.763298096 | 1.807079067 | 2.810435474  |
| ENSMUSG00000025287 | 0.092766027  | 6.830278222 | 0.102330991 | 0.749050085 | 0.999071534 | Acot9    | Acot9    | ACOT9         | 149.4132914 | 128.7186864 | 86.57380336 | 92.48634803 | 116.4165596 | 106.8876153 | 215.890219  | 95.12653695 | 65.60482701 | 88.29996105  |
| ENSMUSG00000018906 | -0.133541284 | 6.1034208   | 0.102325781 | 0.749056258 | 0.999071534 | P4ha2    | P4ha2    | P4HA2         | 43.02036056 | 149.4109119 | 56.88558619 | 46.48601139 | 79.07169697 | 23.79322682 | 43.94168427 | 133.8127103 | 39.20575889 | 67.3850924   |
| ENSMUSG00000033852 | -0.445699754 | 0.656294535 | 0.102290717 | 0.749097811 | 0.999071534 | Pla2g4b  | Gm28042  | JMJD7-PLA2G4B | 2.456301174 | 1.660121243 | 0           | 0           | 4.643581873 | 3.929156722 | 0           | 2.556050739 | 0           | 0            |
| ENSMUSG00000059743 | 0.099662637  | 6.365065001 | 0.102212386 | 0.749190667 | 0.999071534 | Fdps     | Fdps     | FDP5          | 111.7967934 | 46.83913508 | 67.25290012 | 99.91023343 | 85.67735569 | 159.7857067 | 90.79555675 | 34.6793911  | 70.31894631 | 69.67265616  |
| ENSMUSG00000060550 | -0.075853459 | 6.399808912 | 0.1021733   | 0.749237014 | 0.999071534 | H2-Q7    | H2-Q7    |               | 97.90114679 | 95.9905819  | 85.22739895 | 72.0880087  | 99.47729619 | 93.64490188 | 49.37776892 | 97.40625788 | 81.31855803 | 71.04519442  |
| ENSMUSG00000026502 | 0.082648034  | 4.954278494 | 0.102169806 | 0.749241158 | 0.999071534 | Desi2    | Desi2    | DESI2         | 32.98461576 | 38.89426913 | 21.20586941 | 18.52502245 | 45.45478031 | 34.63478888 | 33.32837614 | 33.78131922 | 20.27071302 | 32.67948225  |
| ENSMUSG00000047675 | 0.090120501  | 10.20653443 | 0.102156849 | 0.749256524 | 0.999071534 | Rps8     | Rps8     | RPS8          | 1383.739721 | 938.6799831 | 1199.175085 | 1421.431217 | 973.9749473 | 924.9525973 | 1469.296023 | 1066.425818 | 1124.946004 | 1196.199768  |

|                     |              |              |             |             |             |               |               |          |             |             |             |             |             |             |             |             |             |             |
|---------------------|--------------|--------------|-------------|-------------|-------------|---------------|---------------|----------|-------------|-------------|-------------|-------------|-------------|-------------|-------------|-------------|-------------|-------------|
| ENSMUSG00000002496  | -0.086021719 | 5.077615814  | 0.102136644 | 0.74928049  | 0.999071534 | Tsc2          | Tsc2          | TSC2     | 42.95018053 | 49.2700269  | 27.1300488  | 22.96547727 | 38.78371903 | 46.20397257 | 19.73816451 | 34.74847355 | 19.48502646 | 40.98007074 |
| ENSMUSG000000029559 | -0.079697294 | 4.436167892  | 0.102123438 | 0.749296154 | 0.999071534 | 2210016L21Rik | 2210016L21Rik | C12orf43 | 25.40517214 | 19.68429474 | 21.47515029 | 21.71659935 | 26.61884257 | 16.15319986 | 21.35604685 | 21.20831288 | 18.77790857 | 21.89525311 |
| ENSMUSG000000009207 | 0.07257895   | 4.988404032  | 0.102076738 | 0.749351558 | 0.999071534 | Lnp           | Lnp           | KIAA1715 | 33.54605603 | 27.15484034 | 36.55487965 | 34.20537853 | 28.12310149 | 38.41842128 | 40.18819725 | 27.49481605 | 26.63477408 | 24.50961169 |
| ENSMUSG000000025959 | 0.119938188  | 5.926803283  | 0.102034004 | 0.749402269 | 0.999071534 | Klf7          | Klf7          | KLF7     | 40.49387935 | 71.85953382 | 78.29341626 | 43.29443449 | 68.93429992 | 34.63478888 | 18.31442805 | 105.212575  | 67.64761204 | 67.18901551 |
| ENSMUSG000000029617 | 0.064905329  | 6.362369721  | 0.10202754  | 0.749409942 | 0.999071534 | Ccz1          | Ccz1          | CCZ1B    | 87.37414176 | 78.02569844 | 82.66923058 | 78.05486987 | 91.1057683  | 83.0216263  | 88.91881324 | 79.3757378  | 67.883318   | 85.16273075 |
| ENSMUSG00000001783  | -0.096404767 | 7.203287244  | 0.10201681  | 0.749422676 | 0.999071534 | Rtcb          | Rtcb          | RTCB     | 184.2927681 | 200.8153804 | 133.2940363 | 121.141158  | 153.7614223 | 246.2271546 | 211.9425861 | 86.97480756 | 67.64761204 | 106.3390352 |
| ENSMUSG000000024985 | 0.121171076  | 5.167405859  | 0.102012837 | 0.749427392 | 0.999071534 | Tcf7l2        | Tcf7l2        | TCF7L2   | 23.36995117 | 17.90559341 | 62.40584426 | 40.79667865 | 32.37426799 | 30.05077271 | 14.43151045 | 31.22526848 | 54.21237202 | 42.352609   |
| ENSMUSG000000039741 | 0.098088514  | 3.854523206  | 0.101933168 | 0.749521975 | 0.999071534 | Bahcc1        | Bahcc1        | BAHCC1   | 13.54474647 | 10.5536279  | 15.68561134 | 15.54159187 | 16.41604296 | 23.35665385 | 8.477703446 | 10.77686257 | 14.45663254 | 15.35935666 |
| ENSMUSG000000082289 | -0.302162194 | 0.637223279  | 0.101924838 | 0.749531867 | 0.999071534 | Gm15596       | Gm15596       |          | 2.315941107 | 2.193731643 | 3.029409915 | 0           | 0.654025616 | 0.436572969 | 2.200319978 | 2.832380548 | 0           | 0.653589645 |
| ENSMUSG000000025978 | 0.145490678  | 1.859565362  | 0.101889211 | 0.749574178 | 0.999071534 | Rftn2         | Rftn2         | RFTN2    | 2.737021308 | 4.150303108 | 3.433331237 | 1.80393477  | 5.232204928 | 4.29296753  | 4.918362304 | 2.141556024 | 3.457020824 | 2.941153403 |
| ENSMUSG000000082109 | 0.187166999  | 0.5441358    | 0.101854429 | 0.749615495 | 0.999071534 | Rpl19-ps12    | Rpl19-ps12    |          | 0.842160403 | 1.422961066 | 1.95228639  | 0.832585279 | 1.373453794 | 1.746291877 | 1.747312924 | 1.243484143 | 0.471411931 | 1.764692042 |
| ENSMUSG000000007570 | -0.077965369 | 4.259468864  | 0.101842314 | 0.749629887 | 0.999071534 | Fance         | Fance         | FANCE    | 20.07148959 | 16.83837261 | 20.12874588 | 21.85536356 | 22.36767607 | 24.9574214  | 17.21426807 | 15.75079915 | 14.77090716 | 17.71227938 |
| ENSMUSG000000085006 | -0.389696842 | -0.410934194 | 0.101749343 | 0.749740369 | 0.999071534 | BC021767      | BC021767      |          | 1.754500839 | 0.059290044 | 0.673202203 | 1.110113705 | 0           | 0.582097292 | 0.323576467 | 0           | 0           | 1.764692042 |
| ENSMUSG000000027551 | -0.098259613 | 3.472312278  | 0.101712832 | 0.749783771 | 0.999071534 | Zfp64         | Zfp64         | ZFP64    | 9.333944461 | 11.38368853 | 14.13724627 | 9.85225913  | 14.25775843 | 16.0804377  | 10.16030108 | 10.43145031 | 6.364061063 | 9.477049853 |
| ENSMUSG000000039840 | 0.096768936  | 3.861670156  | 0.101601347 | 0.749916352 | 0.999071534 | Epg5          | Epg5          | EPG5     | 17.40464832 | 14.52606088 | 12.52156098 | 14.63962448 | 13.14591488 | 20.95550252 | 8.801279913 | 14.92180972 | 16.49941757 | 10.52279329 |
| ENSMUSG000000024301 | 0.105177273  | 3.729836267  | 0.101577298 | 0.749944962 | 0.999071534 | Klfc5b        | Klfc5b        | KIFC1    | 14.52726694 | 6.106874574 | 15.95489222 | 10.96237283 | 18.37811981 | 19.35473496 | 17.47312924 | 10.0169556  | 9.113963991 | 11.24174189 |
| ENSMUSG000000030741 | 0.071643188  | 4.825967053  | 0.101513975 | 0.750020314 | 0.999071534 | Spns1         | Spns1         | SPNS1    | 30.03705436 | 33.26171491 | 27.4666499  | 25.18570468 | 27.14206306 | 37.54527535 | 21.42076214 | 30.25811415 | 25.14196693 | 26.01286787 |
| ENSMUSG000000079941 | 0.337940773  | 1.101446425  | 0.101503789 | 0.750032438 | 0.999071534 | Gm11273       | Gm11273       | COXS8    | 2.456301174 | 1.007930755 | 0           | 0           | 5.951633105 | 1.964578361 | 2.847472913 | 2.210638477 | 0           | 4.117614764 |
| ENSMUSG000000047407 | 0.085241454  | 6.799602128  | 0.10149949  | 0.750037554 | 0.999071534 | Tgif1         | Tgif1         | TGIF1    | 90.1813431  | 137.8493532 | 125.4157705 | 82.70347101 | 126.2923464 | 92.26242081 | 76.81705336 | 162.8273403 | 97.34656367 | 114.8357006 |
| ENSMUSG000000051074 | 0.235324145  | -0.141309995 | 0.101493498 | 0.750044686 | 0.999071534 | 4930579K19Rik | 4930579K19Rik |          | 0.350900168 | 0.652190488 | 0.740522424 | 0.971349492 | 0.981038424 | 0.363810808 | 0.388291761 | 0.690824524 | 1.257098482 | 1.176461361 |
| ENSMUSG000000003531 | -0.06781666  | 5.579510126  | 0.101485398 | 0.750054328 | 0.999071534 | Dgcr6         | Dgcr6         | DGCR6    | 57.96870771 | 42.57025188 | 53.72153583 | 48.22056405 | 51.01399804 | 46.20397257 | 58.69677119 | 36.19920505 | 35.43446345 | 48.56171063 |
| ENSMUSG000000032998 | -0.078441337 | 5.08288128   | 0.10147843  | 0.750062623 | 0.999071534 | Foxj3         | Foxj3         | FOXJ3    | 33.12497583 | 48.14351606 | 33.45814951 | 27.96098894 | 37.93348573 | 40.74681045 | 25.56254092 | 46.2852431  | 20.03500705 | 28.03899577 |
| ENSMUSG000000029507 | 0.075372561  | 5.144982936  | 0.101279776 | 0.750299225 | 0.999071534 | Pus1          | Pus1          | PUS1     | 37.19541778 | 26.97697021 | 37.43004251 | 36.49498804 | 40.09177026 | 55.37200492 | 42.77680899 | 27.63298096 | 19.79930108 | 34.77096912 |
| ENSMUSG000000052833 | 0.08811528   | 6.766949695  | 0.101228096 | 0.750360818 | 0.999071534 | Sae1          | Sae1          | SAE1     | 127.8680211 | 87.15636528 | 91.08425812 | 102.7548998 | 105.7559421 | 183.79722   | 136.2904081 | 48.70312894 | 74.40451638 | 83.39803871 |
| ENSMUSG000000096403 | -0.188151262 | 3.654755458  | 0.101146452 | 0.750458161 | 0.999071534 | Gm9825        | Gm9825        |          | 16.14140771 | 27.92561092 | 3.164050356 | 6.03624327  | 16.41604296 | 26.55818896 | 22.52092213 | 5.733843549 | 1.414235792 | 4.836563373 |
| ENSMUSG000000034412 | -0.110197745 | 4.249821098  | 0.101132315 | 0.75047502  | 0.999071534 | Tbc1d10a      | Tbc1d10a      | TBC1D10A | 27.44039311 | 26.91768016 | 13.93528561 | 12.62754339 | 21.71365045 | 36.3083186  | 24.00937388 | 13.95465538 | 7.149747614 | 11.43781879 |
| ENSMUSG000000085287 | -0.174548054 | 0.806099818  | 0.101034226 | 0.750592035 | 0.999071534 | 4833418N02Rik | 4833418N02Rik |          | 2.526481208 | 1.185800888 | 2.221567271 | 1.179495811 | 1.831271725 | 1.164194584 | 1.100159989 | 1.934308667 | 1.649941757 | 1.30717929  |
| ENSMUSG000000063558 | 0.139875103  | 2.499753773  | 0.101025005 | 0.750603038 | 0.999071534 | Aox1          | Aox1          | AOX1     | 4.421342113 | 3.379532531 | 7.405224238 | 6.452535909 | 5.493815174 | 5.529924276 | 2.459181152 | 5.802926001 | 3.928432755 | 10.26135743 |
| ENSMUSG000000029862 | -0.238186151 | 0.055618569  | 0.10101358  | 0.750616672 | 0.999071534 | Clcn1         | Clcn1         | CLCN1    | 1.263240604 | 0.770770577 | 1.683005509 | 1.179495811 | 0.196207685 | 0.436572969 | 0.388291761 | 1.036236786 | 1.257098482 | 0.71894861  |
| ENSMUSG000000022841 | -0.079765679 | 8.406970326  | 0.101006823 | 0.750624736 | 0.999071534 | Ap2m1         | Ap2m1         | AP2M1    | 391.3940471 | 341.5106558 | 537.5376902 | 318.5332512 | 405.038064  | 440.7204123 | 383.5675445 | 293.7385876 | 194.9288333 | 316.0105934 |
| ENSMUSG000000031816 | 0.080299108  | 4.805233268  | 0.100931327 | 0.750714855 | 0.999071534 | Mthfsd        | Mthfsd        | MTHFSD   | 36.35325737 | 25.37613901 | 25.37972307 | 21.92474567 | 32.11265774 | 39.29156722 | 34.49325142 | 19.61941648 | 15.47802505 | 33.00627707 |
| ENSMUSG000000002345 | 0.076804427  | 4.953945307  | 0.100868648 | 0.750789702 | 0.999071534 | 2310045N01Rik | Borcs8        | MEF2B    | 29.05453389 | 22.58950692 | 32.31370576 | 32.19329744 | 39.69935489 | 25.83056734 | 29.18659736 | 30.05086679 | 29.62038297 | 35.81671255 |
| ENSMUSG000000019978 | -0.075219824 | 7.317823332  | 0.100677861 | 0.751017686 | 0.999071534 | Epb4.1l2      | Epb41l2       | EPB41L2  | 145.2726694 | 153.9762453 | 192.6704706 | 149.102147  | 209.3535997 | 194.4932577 | 136.937561  | 141.2736151 | 130.5811048 | 150.5216953 |
| ENSMUSG000000059486 | -0.095732621 | 4.941780684  | 0.100673535 | 0.751022858 | 0.999071534 | Kbtbd2        | Kbtbd2        | KBTBD2   | 30.94939479 | 43.69676273 | 28.1398521  | 25.87952574 | 36.102214   | 45.69463744 | 36.95243258 | 28.7383002  | 7.778296855 | 30.32655953 |
| ENSMUSG000000026289 | 0.075099506  | 4.771850929  | 0.100625846 | 0.751079884 | 0.999071534 | Atg16l1       | Atg16l1       | ATG16L1  | 35.58127701 | 24.19033812 | 26.65880726 | 21.92474567 | 29.6273604  | 32.96125917 | 31.90463969 | 23.0735391  | 25.53481291 | 21.24166346 |
| ENSMUSG000000053110 | 0.101927111  | 10.55416367  | 0.100404709 | 0.751344507 | 0.999071534 | Yap1          | Yap1          | YAP1     | 1188.498868 | 1651.227737 | 1588.68988  | 1370.296604 | 1736.503413 | 1140.183071 | 950.6029459 | 2736.908599 | 1139.638342 | 1430.511656 |
| ENSMUSG000000036820 | -0.078221457 | 5.158042562  | 0.100399082 | 0.751351245 | 0.999071534 | Amhdh2        | Amhdh2        | AMDHD2   | 43.09054059 | 31.18656336 | 43.15226124 | 39.47841863 | 32.37426799 | 29.61419974 | 24.8506727  | 31.98517546 | 31.663168   | 46.66630066 |
| ENSMUSG000000005983 | 0.150411861  | 1.349540476  | 0.100353474 | 0.751405863 | 0.999071534 | 1700037C18Rik | 1700037C18Rik | C16orf90 | 2.737021308 | 2.075151554 | 2.356207712 | 2.358991623 | 2.354492217 | 2.473913492 | 3.17104938  | 2.279720929 | 1.099961171 | 3.398666154 |
| ENSMUSG000000017718 | -0.128660063 | 2.525312088  | 0.100217243 | 0.75156909  | 0.999071534 | Afmid         | Afmid         | AFMID    | 7.649623656 | 6.936935196 | 2.558168373 | 6.452535909 | 6.932671529 | 5.820972922 | 6.147952881 | 4.283112048 | 5.656943167 | 3.790819941 |

|                    |              |              |             |             |             |               |               |            |             |             |             |             |             |             |             |             |             |             |
|--------------------|--------------|--------------|-------------|-------------|-------------|---------------|---------------|------------|-------------|-------------|-------------|-------------|-------------|-------------|-------------|-------------|-------------|-------------|
| ENSMUSG00000043019 | -0.071200148 | 5.442518535  | 0.100140658 | 0.751660904 | 0.999071534 | Edem3         | Edem3         | EDEM3      | 35.44091694 | 52.17523908 | 42.6810197  | 42.32308499 | 58.33908494 | 46.20397257 | 39.60575961 | 49.0485412  | 25.29910694 | 46.07806998 |
| ENSMUSG00000064210 | 0.081630656  | 7.340219175  | 0.10006438  | 0.751752389 | 0.999071534 | Ano6          | Ano6          | ANO6       | 135.8685449 | 158.897319  | 183.7842015 | 186.0828098 | 148.7254251 | 185.9073227 | 105.9389354 | 164.0708244 | 155.8016431 | 187.5802281 |
| ENSMUSG00000066684 | 0.175234745  | 1.791258203  | 0.100048188 | 0.751771814 | 0.999071534 | Pilrb1        | Pilrb1        | PILRB      | 5.684582717 | 3.675982753 | 1.683005509 | 1.387642131 | 3.989556257 | 3.34705943  | 2.070889391 | 1.588896405 | 2.121353688 | 8.039152634 |
| ENSMUSG00000097893 | -0.110527102 | 6.371974917  | 0.100031032 | 0.751792397 | 0.999071534 | 1700034P13Rik | 1700034P13Rik |            | 76.49623656 | 34.38822576 | 128.8509017 | 123.5695318 | 78.15606111 | 75.09055069 | 37.85844669 | 64.24668073 | 85.24699078 | 114.4435468 |
| ENSMUSG00000057177 | -0.06665232  | 5.492729372  | 0.100024247 | 0.751800539 | 0.999071534 | Gsk3a         | Gsk3a         | AC006486.9 | 44.3537812  | 50.69298797 | 49.27840129 | 38.92336177 | 55.8537876  | 62.79374539 | 34.88154319 | 44.07460463 | 34.41307093 | 38.69250699 |
| ENSMUSG00000031311 | 0.07821226   | 8.377114589  | 0.09982319  | 0.751850853 | 0.999071534 | Nono          | Nono          | NONO       | 309.0026877 | 344.0601277 | 322.6658161 | 326.0265187 | 377.3073778 | 423.3302557 | 274.9105667 | 321.7860633 | 286.2256105 | 349.866537  |
| ENSMUSG00000081534 | -0.082519719 | 7.256229235  | 0.09965748  | 0.751870741 | 0.999071534 | Slc48a1       | Slc48a1       | SLC48A1    | 168.4320805 | 190.3803326 | 132.2169128 | 137.0296604 | 190.4522594 | 198.0586037 | 213.1721767 | 112.39715   | 89.01828623 | 120.5872895 |
| ENSMUSG00000074218 | 0.182552313  | 1.714500501  | 0.099814147 | 0.752052779 | 0.999071534 | Cox7a1        | Cox7a1        | COX7A1     | 4.982782381 | 0.889350666 | 3.164050356 | 4.093544286 | 2.158284533 | 0.873145938 | 3.947632902 | 2.486968286 | 4.556981996 | 3.464025119 |
| ENSMUSG00000025867 | 0.164070994  | 1.801284066  | 0.099573735 | 0.752341769 | 0.999071534 | Cplx2         | Cplx2         | CPLX2      | 3.438821644 | 1.956571465 | 4.375814322 | 3.122194795 | 3.531738326 | 5.893735083 | 1.229590576 | 1.312566595 | 4.242707375 | 4.575127515 |
| ENSMUSG00000060429 | -0.339076301 | -0.226794075 | 0.099554502 | 0.752364906 | 0.999071534 | Sntb1         | Sntb1         | SNTB1      | 1.122880537 | 2.193731643 | 0.06732022  | 0.416292639 | 0.327012808 | 1.8918162   | 1.035444696 | 0.414494714 | 0           | 0           |
| ENSMUSG00000023259 | 0.139450075  | 1.972745283  | 0.099466006 | 0.752471392 | 0.999071534 | Slc26a6       | Slc26a6       | SLC26A6    | 2.38612114  | 3.142372354 | 5.99149961  | 2.844666369 | 4.381971627 | 6.257545891 | 2.847472913 | 3.108710358 | 2.592765618 | 4.901922338 |
| ENSMUSG00000064264 | 0.112908093  | 3.067224056  | 0.0994563   | 0.752483073 | 0.999071534 | Zfp428        | Zfp428        | ZNF428     | 11.22880537 | 7.292675462 | 10.16535327 | 5.758714844 | 6.867268968 | 15.1345296  | 8.024696391 | 5.733843549 | 6.992610304 | 6.666614379 |
| ENSMUSG00000029826 | -0.077238649 | 6.239106069  | 0.099434939 | 0.752508786 | 0.999071534 | Zc3hav1       | Zc3hav1       | ZC3HAV1    | 59.09158824 | 83.77683275 | 87.24700556 | 74.65514665 | 97.25360909 | 84.47686953 | 41.74136429 | 84.34967437 | 70.71178959 | 70.58768167 |
| ENSMUSG00000057963 | -0.130559865 | 4.007914182  | 0.099390718 | 0.752562025 | 0.999071534 | Itpk1         | Itpk1         | ITPK1      | 13.96582667 | 35.21828638 | 10.09803305 | 9.505348597 | 18.44352237 | 10.84156207 | 7.959981098 | 29.29095982 | 10.05678785 | 14.37897219 |
| ENSMUSG00000090841 | -0.085920988 | 11.0589007   | 0.099343875 | 0.752618434 | 0.999071534 | MyI6          | MyI6          | MYL6       | 2782.63833  | 1708.44263  | 2269.095347 | 2563.738219 | 2051.547552 | 2067.53682  | 2710.858929 | 1575.770739 | 1548.588192 | 2115.016091 |
| ENSMUSG00000080981 | -0.31277507  | 0.335096852  | 0.09931325  | 0.752655323 | 0.999071534 | Gm12161       | Gm12161       |            | 2.035220973 | 1.837991377 | 1.077123525 | 0.416292639 | 1.111843547 | 3.274297269 | 1.941458804 | 0           | 0.15713731  | 0           |
| ENSMUSG00000026096 | 0.133179542  | 2.448976649  | 0.099282527 | 0.752692335 | 0.999071534 | Osgsep1l      | Osgsep1l      | OSGEPL1    | 5.333682549 | 6.344034752 | 5.85685917  | 2.983430582 | 6.017035667 | 6.69411886  | 9.513148141 | 5.388431287 | 2.199922343 | 3.790819941 |
| ENSMUSG00000029326 | 0.082816066  | 4.869896244  | 0.099239568 | 0.752744098 | 0.999071534 | Enoph1        | Enoph1        | ENOPH1     | 36.63397751 | 19.6250047  | 24.90848153 | 31.43009427 | 34.20553971 | 37.76356183 | 41.48250312 | 18.16868498 | 22.70634132 | 26.3396627  |
| ENSMUSG00000017057 | -0.100024749 | 7.5445161    | 0.099225922 | 0.752760543 | 0.999071534 | Il13ra1       | Il13ra1       | IL13RA1    | 227.5236687 | 307.7746205 | 130.1973061 | 172.1370063 | 167.2997526 | 163.6421013 | 273.5515455 | 223.0672388 | 94.91093536 | 120.8487254 |
| ENSMUSG00000022102 | -0.147301122 | 3.76268678   | 0.099218385 | 0.752769626 | 0.999071534 | Dok2          | Dok2          | DOK2       | 29.19489395 | 12.86593964 | 9.290190407 | 11.23990126 | 11.18383803 | 27.72238354 | 21.03247038 | 4.421276953 | 2.985608894 | 10.1306395  |
| ENSMUSG00000018500 | -0.232942062 | 1.014967782  | 0.099189337 | 0.752804639 | 0.999071534 | Adora2b       | Adora2b       | ADORA2B    | 2.035220973 | 2.608761954 | 2.01960661  | 3.260959008 | 0.523220493 | 2.473913492 | 3.300479967 | 1.865226215 | 0.942823861 | 0           |
| ENSMUSG00000021738 | 0.08013299   | 4.429135436  | 0.099158874 | 0.752841362 | 0.999071534 | Atxn7         | Atxn7         | ATXN7      | 23.58049127 | 19.32855448 | 21.94639183 | 20.88401407 | 22.3022735  | 24.15703763 | 14.36679515 | 23.34986891 | 23.41345922 | 19.60768935 |
| ENSMUSG00000041124 | -0.077663079 | 5.050108971  | 0.099085598 | 0.752929724 | 0.999071534 | Msantd4       | Msantd4       | MSANTD4    | 40.49387935 | 41.62161117 | 24.23527932 | 33.78908589 | 36.102214   | 50.35141577 | 40.31762784 | 24.24794079 | 19.64216377 | 25.29391926 |
| ENSMUSG00000021048 | 0.081758125  | 5.359295053  | 0.099062095 | 0.752958073 | 0.999071534 | Mthfd1        | Mthfd1        | MTHFD1     | 45.12576157 | 36.75982753 | 40.86337375 | 38.02139439 | 45.9780008  | 82.439529   | 48.98947716 | 26.52766172 | 24.27771443 | 30.84943125 |
| ENSMUSG00000049687 | -0.259332865 | -0.155792836 | 0.099022857 | 0.75300541  | 0.999071534 | Fam109b       | Fam109b       | FAM109B    | 0.561440268 | 0.177870133 | 1.009803305 | 2.22022741  | 0.261610246 | 1.382481069 | 0.647152935 | 0.552659619 | 0.628549241 | 0.261435858 |
| ENSMUSG00000071141 | 0.085729576  | 6.854649043  | 0.098960304 | 0.753080896 | 0.999071534 | Rpl36a-ps3    | Rpl36a-ps3    |            | 149.9045516 | 123.9161928 | 104.0770606 | 102.4773714 | 103.2052422 | 143.5597447 | 199.128958  | 74.74721349 | 80.92571475 | 85.35880764 |
| ENSMUSG00000025533 | -0.070274468 | 5.106489295  | 0.098898268 | 0.753155782 | 0.999071534 | Asl           | Asl           | AC068533.7 | 31.65119513 | 29.82289234 | 36.01631788 | 37.119427   | 47.87467509 | 33.17954565 | 37.6643008  | 33.78131922 | 25.3776756  | 31.56837986 |
| ENSMUSG00000078851 | 0.133140354  | 2.879314778  | 0.098869698 | 0.75319028  | 0.999071534 | Hist3h2a      | Hist3h2a      |            | 6.596923153 | 9.308536972 | 7.80914556  | 3.330341114 | 9.0255535   | 4.80230266  | 5.824376413 | 8.428059192 | 10.76390575 | 4.967281302 |
| ENSMUSG00000029815 | 0.089379946  | 5.572055165  | 0.098851757 | 0.753211946 | 0.999071534 | Malsu1        | Malsu1        | MALSU1     | 64.63581089 | 29.52644211 | 48.87447997 | 59.39108321 | 35.05577302 | 31.72430242 | 49.31305363 | 40.55139956 | 54.05523471 | 53.26755607 |
| ENSMUSG00000032254 | 0.105375905  | 4.72800966   | 0.098848326 | 0.753216089 | 0.999071534 | Klf23         | Klf23         | KLF23      | 33.40569597 | 14.76322106 | 28.40913298 | 24.56126572 | 31.0008142  | 64.03070214 | 28.7335903  | 14.09282029 | 14.22092657 | 19.73840728 |
| ENSMUSG00000037408 | -0.094963548 | 3.548328966  | 0.098789322 | 0.753287361 | 0.999071534 | Cnnm4         | Cnnm4         | CNNM4      | 12.63240604 | 12.09516906 | 15.68561134 | 8.672763319 | 13.14591488 | 16.0804377  | 10.67802342 | 9.740625788 | 9.821081887 | 8.300588492 |
| ENSMUSG00000031700 | -0.093710247 | 3.663118195  | 0.098613843 | 0.75349946  | 0.999071534 | Gpt2          | Gpt2          | GPT2       | 15.93086761 | 17.66843323 | 9.424830848 | 9.921641237 | 14.58477124 | 11.64194584 | 12.8783434  | 13.26383086 | 8.878258026 | 11.82997258 |
| ENSMUSG00000056904 | 0.321576683  | 0.304973889  | 0.098607632 | 0.753506972 | 0.999071534 | Gm5620        | Gm5620        |            | 2.526481208 | 1.48225111  | 0.134640441 | 0           | 0.981038424 | 3.34705943  | 2.265035272 | 0.690824524 | 0.078568655 | 0.065358965 |
| ENSMUSG00000038507 | -0.066354665 | 5.824195997  | 0.098585202 | 0.753534098 | 0.999071534 | Parp12        | Parp12        | PARP12     | 65.61833136 | 62.90673712 | 60.72283875 | 58.76664425 | 51.99503647 | 79.89285335 | 43.6828231  | 42.07121351 | 50.67678254 | 53.00612021 |
| ENSMUSG00000044337 | -0.085494207 | 6.589268223  | 0.09854554  | 0.753582074 | 0.999071534 | Ackr3         | Ackr3         | ACKR3      | 112.7793139 | 132.6911194 | 72.77315819 | 77.91610565 | 120.6023236 | 77.7098851  | 129.2364411 | 117.9237462 | 47.37689902 | 80.52224427 |
| ENSMUSG00000024182 | -0.083691912 | 5.63324857   | 0.098530151 | 0.753600691 | 0.999071534 | Axin1         | Axin1         | AXIN1      | 68.35535267 | 59.17146432 | 45.03722741 | 39.13150809 | 54.153321   | 87.09630734 | 62.83854997 | 32.88324734 | 23.0991846  | 37.1996873  |
| ENSMUSG00000070939 | 0.08224819   | 4.341046245  | 0.098518164 | 0.753615194 | 0.999071534 | Tgfbtrap1     | Tgfbtrap1     | TGFBRAP1   | 19.01878909 | 18.85423412 | 21.87907161 | 21.2309246  | 20.40559922 | 29.54143758 | 13.20191987 | 17.408778   | 14.45663254 | 27.32004716 |
| ENSMUSG00000039195 | 0.101337635  | 3.667306851  | 0.098464038 | 0.753680693 | 0.999071534 | 1110008P14Rik | 1110008P14Rik | C9orf16    | 16.28176778 | 11.91729893 | 13.26208341 | 9.782877023 | 11.96866877 | 13.46099988 | 21.8090539  | 11.67493445 | 6.521198373 | 10.32671639 |
| ENSMUSG00000074342 | -0.127861225 | 2.183313908  | 0.098450426 | 0.753697168 | 0.999071534 | 1830077J02Rik | 1830077J02Rik | C1orf162   | 6.807463254 | 4.387463286 | 5.520258068 | 3.538487434 | 3.727946011 | 6.912405345 | 3.818202315 | 2.832380548 | 2.907040239 | 4.444409586 |

|                     |              |              |             |             |             |               |               |          |             |             |             |             |             |             |             |             |             |             |
|---------------------|--------------|--------------|-------------|-------------|-------------|---------------|---------------|----------|-------------|-------------|-------------|-------------|-------------|-------------|-------------|-------------|-------------|-------------|
| ENSMUSG00000031959  | -0.106226278 | 3.755403158  | 0.098428688 | 0.753723481 | 0.999071534 | Wdr59         | Wdr59         | WDR59    | 12.49204597 | 18.49849386 | 12.18495988 | 12.83568971 | 16.08903015 | 17.60844309 | 11.64875283 | 20.10299365 | 4.32127603  | 10.39207536 |
| ENSMUSG00000029551  | 0.098754845  | 4.939686486  | 0.098374024 | 0.753789663 | 0.999071534 | Psmg3         | Psmg3         | PSMG3    | 52.70520519 | 25.31684896 | 24.70652087 | 23.65929833 | 27.66528356 | 39.58261587 | 53.26068653 | 15.33630443 | 24.27771443 | 22.22204793 |
| ENSMUSG00000000167  | 0.189529319  | 0.641305631  | 0.098314119 | 0.753862214 | 0.999071534 | Ph1d2         | Ph1d2         | PIH1D2   | 2.17558104  | 0.53361104  | 1.211763966 | 1.942698983 | 1.046440986 | 1.964578361 | 1.941458804 | 0.759906976 | 1.649941757 | 1.045743432 |
| ENSMUSG000000024758 | -0.079007035 | 7.629602094  | 0.098282284 | 0.75390078  | 0.999071534 | Rtn3          | Rtn3          | RTN3     | 171.9410822 | 219.1360041 | 223.5704518 | 203.7058648 | 236.8880781 | 199.0045118 | 223.1383319 | 198.1975559 | 165.2298817 | 139.868184  |
| ENSMUSG00000002043  | -0.0762747   | 4.737383077  | 0.098107314 | 0.754112862 | 0.999071534 | Trappc6a      | Trappc6a      | TRAPPC6A | 28.00183338 | 26.50264985 | 22.48495359 | 32.54020797 | 31.58943725 | 22.70179439 | 20.8383245  | 29.29095982 | 21.68494881 | 28.95402128 |
| ENSMUSG00000025371  | -0.109778113 | 4.742707926  | 0.098105863 | 0.754114623 | 0.999071534 | Chmp6         | Chmp6         | CHMP6    | 34.87947667 | 30.65295296 | 25.85096461 | 23.45115201 | 29.23494503 | 44.16663204 | 44.71826779 | 9.257048621 | 9.585375922 | 22.54884275 |
| ENSMUSG000000055632 | 0.243489606  | 0.136782755  | 0.098080071 | 0.754145903 | 0.999071534 | Hmcn2         | Hmcn2         | HMCN2    | 0.842160403 | 1.778701332 | 1.346404407 | 0           | 0.654025616 | 1.091432423 | 1.164875283 | 1.381649048 | 0.707117896 | 0.71894861  |
| ENSMUSG00000031095  | -0.077104111 | 6.201404115  | 0.097999428 | 0.754243736 | 0.999071534 | Cul4b         | Cul4b         | CUL4B    | 66.46049176 | 103.6982877 | 63.61760822 | 79.442512   | 78.09065855 | 73.78083178 | 79.59981098 | 98.37341221 | 43.0562299  | 52.61396643 |
| ENSMUSG00000090394  | 0.105599609  | 3.958058767  | 0.097951158 | 0.754302317 | 0.999071534 | 4930523C07Rik | 4930523C07Rik | KIAA0040 | 15.57996745 | 11.97658897 | 17.97449883 | 14.63962448 | 16.87386089 | 8.513172898 | 12.29590576 | 13.0565835  | 22.07779208 | 17.45084352 |
| ENSMUSG000000006675 | -0.401763351 | -0.89320437  | 0.097912097 | 0.754349733 | 0.999071534 | P4htm         | P4htm         | P4HTM    | 0.421080201 | 0           | 0.605881983 | 1.387642131 | 0           | 0.218286485 | 0.19414588  | 0.138164905 | 1.021392516 | 0           |
| ENSMUSG00000022787  | -0.094814093 | 3.442726677  | 0.097905862 | 0.754357302 | 0.999071534 | Wdr53         | Wdr53         | WDR53    | 13.40438641 | 10.31646773 | 12.05031944 | 11.79495811 | 9.941189363 | 13.38823772 | 9.513148141 | 8.013564478 | 10.21392516 | 9.084896066 |
| ENSMUSG00000023094  | -0.163960291 | 1.629918406  | 0.097868558 | 0.754402598 | 0.999071534 | Msrb2         | Msrb2         | MSRB2    | 4.982782381 | 1.422961066 | 3.231370576 | 3.469105327 | 3.139322957 | 3.34705943  | 5.694945826 | 1.588896405 | 1.492804447 | 1.633974113 |
| ENSMUSG00000027305  | -0.12074815  | 2.78278893   | 0.097824456 | 0.754456159 | 0.999071534 | Ndufaf1       | Ndufaf1       | NDUFAF1  | 7.228543455 | 4.624623464 | 9.424830848 | 4.995511672 | 10.39900729 | 5.093351307 | 6.859821109 | 6.63191543  | 6.835472994 | 5.097999231 |
| ENSMUSG00000039959  | -0.105231188 | 4.012202696  | 0.097809422 | 0.75447442  | 0.999071534 | Hip1          | Hip1          | HIP1     | 19.86094949 | 22.70808701 | 14.33920693 | 13.7376571  | 15.76201734 | 33.61611862 | 17.99085159 | 8.35897674  | 8.249708785 | 10.65351121 |
| ENSMUSG000000052760 | 0.09305262   | 3.350573105  | 0.097775183 | 0.754516015 | 0.999071534 | A630001G21Rik | A630001G21Rik |          | 12.7727661  | 9.486407105 | 11.10783636 | 12.90507182 | 10.98763035 | 11.05984855 | 12.55476693 | 10.1551205  | 9.899650542 | 12.94107497 |
| ENSMUSG000000002968 | 0.067851019  | 5.52594409   | 0.097761579 | 0.754532544 | 0.999071534 | Med25         | Med25         | MED25    | 49.12602348 | 48.14351606 | 43.82546344 | 37.81324807 | 54.74194406 | 56.09962653 | 33.91081378 | 45.31808877 | 47.29833037 | 43.13691657 |
| ENSMUSG00000025982  | 0.082879392  | 8.055412692  | 0.097696793 | 0.754611277 | 0.999071534 | Sf3b1         | Sf3b1         | SF3B1    | 285.6327365 | 317.0831575 | 241.7469112 | 202.526369  | 299.8053424 | 292.6494136 | 234.0752165 | 360.0577419 | 177.2508859 | 264.0502166 |
| ENSMUSG00000039768  | -0.074743973 | 5.047384442  | 0.097657878 | 0.754658584 | 0.999071534 | Dnajk11       | Dnajk11       | DNAJC11  | 43.7221609  | 34.86254611 | 40.12285132 | 23.45115201 | 34.14013715 | 53.62571304 | 27.69814561 | 23.90252853 | 24.74912636 | 29.01938024 |
| ENSMUSG00000034071  | 0.412618811  | -1.035090999 | 0.097623102 | 0.754700867 | 0.999071534 | Zfp551        | Zfp551        | ZNF551   | 0.140360067 | 1.007930755 | 0           | 0           | 0.39241537  | 1.091432423 | 0.582437641 | 0.414494714 | 0           | 0           |
| ENSMUSG00000040006  | 0.074076815  | 5.218076704  | 0.097602311 | 0.754726151 | 0.999071534 | Ginm1         | Ginm1         | GINM1    | 32.49335553 | 35.69260673 | 40.19017154 | 37.88263018 | 41.13821124 | 30.63287    | 37.08186316 | 52.15725156 | 28.44185315 | 33.52914879 |
| ENSMUSG00000020843  | 0.078328605  | 4.965428155  | 0.097472291 | 0.754884332 | 0.999071534 | Timm22        | Timm22        | TIMM22   | 32.8442557  | 24.13104807 | 30.63070026 | 31.7770048  | 37.8026806  | 35.72622131 | 49.50719951 | 23.55711627 | 19.95643839 | 27.64684199 |
| ENSMUSG00000029563  | 0.214501321  | 0.156106067  | 0.097378249 | 0.754998815 | 0.999071534 | Foxp2         | Foxp2         | FOXP2    | 0.98252047  | 0.53361104  | 0.875162864 | 1.179495811 | 1.177246109 | 0.9459081   | 0.453007054 | 0.690824524 | 1.964216377 | 0.849666539 |
| ENSMUSG00000024556  | -0.097251375 | 5.454356464  | 0.097358516 | 0.755022845 | 0.999071534 | Me2           | Me2           | ME2      | 55.58258657 | 67.17562031 | 38.50716604 | 28.37728158 | 46.63202642 | 74.5084534  | 64.5211476  | 31.15618603 | 17.44224143 | 26.47038062 |
| ENSMUSG00000041440  | 0.1477609    | 1.856232497  | 0.097351098 | 0.755031879 | 0.999071534 | Gk5           | Gk5           | GK5      | 2.245761073 | 3.616692709 | 4.577774983 | 2.289609516 | 4.51277675  | 2.983248622 | 1.68259763  | 4.214029596 | 4.242707375 | 4.117614764 |
| ENSMUSG00000050310  | 0.09317773   | 5.640021785  | 0.09733254  | 0.755054481 | 0.999071534 | Rictor        | Rictor        | RICTOR   | 38.24811828 | 55.37690148 | 58.09735015 | 39.82532916 | 58.86230544 | 40.38299964 | 27.7628609  | 93.26131073 | 36.77013059 | 46.47022376 |
| ENSMUSG00000073628  | -0.307102834 | -0.347580955 | 0.097203708 | 0.755211455 | 0.999071534 | Gm10552       | Gm10552       |          | 0           | 0.711480533 | 1.683005509 | 0.624438959 | 0.654025616 | 1.528005392 | 0.647152935 | 0.207247357 | 0           | 0.653589645 |
| ENSMUSG00000020305  | 0.095789117  | 3.599300754  | 0.097180955 | 0.755239189 | 0.999071534 | Asb3          | Asb3          | ASB3     | 11.86042567 | 16.89766266 | 8.616988204 | 10.26855177 | 12.68809695 | 15.06176744 | 15.9199622  | 8.773471454 | 7.935434165 | 13.0717929  |
| ENSMUSG00000024283  | 0.068238331  | 6.097868841  | 0.09716309  | 0.755260969 | 0.999071534 | Wac           | Wac           | WAC      | 63.30239025 | 77.07705773 | 58.43395126 | 73.19812241 | 74.10110229 | 82.65781549 | 54.49027711 | 80.96463421 | 62.38351215 | 56.79694015 |
| ENSMUSG00000027523  | 0.099221862  | 9.175944015  | 0.09703904  | 0.755412259 | 0.999071534 | Gnas          | Gnas          | GNAS     | 388.9377459 | 572.2675086 | 667.5473049 | 524.5981076 | 747.551279  | 457.0918987 | 332.5071779 | 915.4806591 | 490.1898392 | 642.4786211 |
| ENSMUSG00000028696  | 0.117106975  | 3.037712552  | 0.097011766 | 0.755445536 | 0.999071534 | Ipp           | Ipp           | IPP      | 11.5095255  | 8.182026128 | 5.183656966 | 8.811527532 | 6.54025616  | 10.91432423 | 12.29590576 | 4.697606763 | 6.992610304 | 6.143742663 |
| ENSMUSG00000047528  | -0.287867513 | 0.118627385  | 0.096959617 | 0.755509178 | 0.999071534 | Als2cr12      | Als2cr12      | ALS2CR12 | 1.473780704 | 0.592900444 | 2.221567271 | 0           | 1.177246109 | 0.727621615 | 0.841298815 | 1.4507315   | 0           | 1.176461361 |
| ENSMUSG00000024697  | -0.293614218 | -0.347344722 | 0.096864702 | 0.755625059 | 0.999071534 | Gna14         | Gna14         | GNA14    | 0.701800335 | 1.719411288 | 0.403921322 | 0.763203172 | 0.065402562 | 1.528005392 | 0.906014109 | 0.345412262 | 0           | 0.261435858 |
| ENSMUSG00000029761  | -0.089804907 | 9.130452643  | 0.096860342 | 0.755630383 | 0.999071534 | Cald1         | Cald1         | CALD1    | 413.7814778 | 633.6327046 | 765.0943042 | 636.7195918 | 538.851705  | 568.3452437 | 346.9386883 | 510.5193232 | 604.350095  | 545.2898409 |
| ENSMUSG000000001441 | 0.099623907  | 7.77026441   | 0.096733008 | 0.755785945 | 0.999071534 | Npepps        | Npepps        | NPEPPS   | 166.7477597 | 233.8399351 | 238.919462  | 195.1718657 | 259.9751823 | 153.3826365 | 113.5106248 | 337.9513571 | 195.9502258 | 263.8541397 |
| ENSMUSG00000030753  | 0.114437838  | 5.642779269  | 0.096702825 | 0.755822837 | 0.999071534 | Prkrir        | Prkrir        | THAP12   | 76.07515636 | 62.19525658 | 35.81435722 | 32.74835429 | 43.36189834 | 80.11113984 | 105.8742201 | 29.98178434 | 17.44224143 | 28.62722645 |
| ENSMUSG00000026694  | 0.098406964  | 3.456620011  | 0.096603631 | 0.75594412  | 0.999071534 | Mettl13       | Mettl13       | METTL13  | 12.21132584 | 9.130666839 | 11.98299922 | 7.562649614 | 13.7999405  | 16.80805931 | 9.901439902 | 8.773471454 | 6.756904338 | 13.39858772 |
| ENSMUSG00000013698  | -0.073432015 | 6.771339436  | 0.096572064 | 0.75598273  | 0.999071534 | Pea15a        | Pea15a        | PEA15    | 119.235877  | 144.3712581 | 89.87249416 | 89.08662481 | 141.2041305 | 145.8153717 | 115.8403753 | 105.6270697 | 59.94788384 | 98.6920364  |
| ENSMUSG00000032305  | -0.086281894 | 3.885744456  | 0.096507911 | 0.756061219 | 0.999071534 | Fam219b       | Fam219b       | FAM219B  | 15.29924731 | 20.6922255  | 16.83005509 | 11.23990126 | 14.51936867 | 15.64386473 | 15.72581632 | 11.67493445 | 9.742513232 | 16.40510009 |
| ENSMUSG000000061461 | -0.086078612 | 5.056942836  | 0.096456651 | 0.756123955 | 0.999071534 | Smim20        | Smim20        | SMIM20   | 55.30186643 | 26.62122994 | 25.31240285 | 39.06212599 | 30.93541163 | 32.37916188 | 48.01874776 | 21.41556024 | 22.15636074 | 32.35268743 |

|                    |              |              |             |             |             |               |               |          |             |             |             |             |             |             |             |             |             |             |
|--------------------|--------------|--------------|-------------|-------------|-------------|---------------|---------------|----------|-------------|-------------|-------------|-------------|-------------|-------------|-------------|-------------|-------------|-------------|
| ENSMUSG00000031442 | 0.101868661  | 3.970777117  | 0.09642927  | 0.756157473 | 0.999071534 | Mcf2l         | Mcf2l         | MCF2L    | 12.70258607 | 17.37198301 | 17.70521795 | 11.93372233 | 18.37811981 | 19.13644848 | 8.865995207 | 18.58317969 | 7.385453579 | 25.29391926 |
| ENSMUSG00000082809 | 0.246395289  | 5.227225186  | 0.096419739 | 0.756169141 | 0.999071534 | Gm14150       | Gm14150       |          | 82.88261961 | 65.98981943 | 6.126140051 | 7.285121188 | 17.98570444 | 97.21024779 | 104.6446296 | 6.010173358 | 2.357059653 | 4.771204409 |
| ENSMUSG00000028293 | 0.068240411  | 5.52967672   | 0.096358849 | 0.756243703 | 0.999071534 | Slc35a1       | Slc35a1       | SLC35A1  | 47.72242281 | 43.28173242 | 51.9712101  | 47.38797877 | 42.77327528 | 44.89425366 | 63.03269585 | 36.75186467 | 37.71295445 | 44.77089069 |
| ENSMUSG00000021313 | 0.275390745  | -0.356312003 | 0.096350725 | 0.756253652 | 0.999071534 | Ryr2          | Ryr2          | RYR2     | 1.684320805 | 0.711480533 | 0.06732022  | 0.20814632  | 0.457817931 | 0.727621615 | 0.582437641 | 0.483577167 | 1.335667137 | 0.196076894 |
| ENSMUSG00000041840 | 0.096788848  | 4.956716204  | 0.096304043 | 0.756310835 | 0.999071534 | Haus1         | Haus1         | HAUS1    | 57.40726744 | 20.04003501 | 27.19736902 | 24.97755836 | 26.29182976 | 38.70946993 | 52.67824889 | 20.51748836 | 20.34928167 | 24.77104755 |
| ENSMUSG00000003992 | -0.090102955 | 4.391665833  | 0.096203034 | 0.756434618 | 0.999071534 | Ssbp2         | Ssbp2         | SSBP2    | 21.1241901  | 26.62122994 | 17.83985839 | 16.44355925 | 30.21598346 | 14.77071879 | 14.23736457 | 28.25472303 | 15.71373102 | 23.13707343 |
| ENSMUSG00000031328 | -0.093570397 | 10.36101342  | 0.096150465 | 0.756499068 | 0.999071534 | Flna          | Flna          | FLNA     | 1580.384175 | 2007.264453 | 1173.660721 | 1037.331875 | 1281.563194 | 2510.658383 | 1179.7598   | 1025.805336 | 668.0692743 | 1073.063479 |
| ENSMUSG00000025583 | -0.082396976 | 4.377558975  | 0.096069156 | 0.756598791 | 0.999071534 | Rptor         | Rptor         | RPTOR    | 20.98383003 | 31.48301358 | 17.30129663 | 17.06799821 | 23.87193498 | 30.26905919 | 15.46695514 | 14.85272726 | 15.32088774 | 22.94099654 |
| ENSMUSG00000019856 | -0.268886025 | -0.518293584 | 0.096006677 | 0.756675451 | 0.999071534 | Fam184a       | Fam184a       | FAM184A  | 0.561440268 | 1.067220799 | 0.538561763 | 0           | 1.046440986 | 0.436572969 | 0.776583522 | 0.483577167 | 0.235705965 | 0.522871716 |
| ENSMUSG00000034055 | -0.074874909 | 4.368963226  | 0.09597584  | 0.756713298 | 0.999071534 | Phka1         | Phka1         | PHKA1    | 20.00130956 | 21.16654585 | 27.26468924 | 20.81463196 | 19.94778129 | 25.97609166 | 18.18499747 | 19.68849893 | 17.36367278 | 15.88222837 |
| ENSMUSG00000040761 | 0.088261429  | 4.674096211  | 0.095899165 | 0.756807429 | 0.999071534 | Spen          | Spen          | SPEN     | 24.21211157 | 34.92183616 | 19.45554368 | 22.06350988 | 27.46907587 | 31.86982675 | 11.84289871 | 32.81416489 | 20.97783091 | 29.2808161  |
| ENSMUSG00000003437 | -0.067953169 | 5.087635433  | 0.095850119 | 0.756867664 | 0.999071534 | Paf1          | Paf1          | PAF1     | 34.45839647 | 37.41201802 | 32.65030687 | 36.91128068 | 38.45670622 | 46.85883202 | 26.66270091 | 25.00784777 | 25.53481291 | 38.23499424 |
| ENSMUSG00000028031 | -0.113374649 | 6.431109921  | 0.095821415 | 0.756902923 | 0.999071534 | Dkk2          | Dkk2          | DKK2     | 88.7075624  | 49.74434726 | 109.3953581 | 152.7793986 | 57.88126701 | 98.5199667  | 81.73541566 | 26.52766172 | 107.7176261 | 78.56147533 |
| ENSMUSG00000021263 | -0.258176533 | -0.253311698 | 0.095731166 | 0.757013821 | 0.999071534 | Degs2         | Degs2         | DEGS2    | 1.403600671 | 0.5336104   | 0.807842644 | 0.20814632  | 1.046440986 | 1.45524323  | 0.776583522 | 0.414494714 | 0           | 0.653589645 |
| ENSMUSG00000037104 | 0.065667724  | 6.054710222  | 0.095728156 | 0.757017521 | 0.999071534 | Socs5         | Socs5         | SOC5     | 58.10906777 | 61.24661587 | 67.05093946 | 70.70036657 | 79.07169697 | 95.24566943 | 67.95105815 | 51.9500042  | 57.11941226 | 59.4766577  |
| ENSMUSG00000022223 | -0.109200478 | 3.245599935  | 0.095710957 | 0.757038662 | 0.999071534 | Sdr39u1       | Sdr39u1       | SDR39U1  | 9.544484562 | 13.2216799  | 8.953589305 | 6.175007483 | 12.81890207 | 8.513172898 | 8.089411685 | 11.39860464 | 4.32127603  | 11.50317775 |
| ENSMUSG00000028251 | 0.092205382  | 3.97530017   | 0.095681572 | 0.757074787 | 0.999071534 | Tstd3         | Tstd3         | TSTD3    | 16.49230788 | 12.74735955 | 18.8496617  | 17.48429085 | 12.49188926 | 15.20729176 | 19.28515746 | 11.95126426 | 17.91365336 | 11.9606905  |
| ENSMUSG00000051817 | -0.103688828 | 3.611939194  | 0.095674474 | 0.757083514 | 0.999071534 | Sox12         | Sox12         | SOX12    | 17.61518842 | 10.37575777 | 12.45424076 | 11.44804758 | 13.34212257 | 21.68312413 | 11.58403753 | 8.704389002 | 4.399844685 | 12.87571601 |
| ENSMUSG00000025651 | -0.075439784 | 7.127149368  | 0.095649726 | 0.757113944 | 0.999071534 | Uqcr1         | Uqcr1         | UQCRC1   | 167.9408203 | 138.857284  | 142.2476256 | 137.7928636 | 158.2087965 | 184.9614146 | 181.9794053 | 98.02799995 | 89.64683547 | 116.1428799 |
| ENSMUSG00000030602 | -0.078599275 | 4.504687943  | 0.095596758 | 0.757179089 | 0.999071534 | Pak4          | Pak4          | PAK4     | 25.26481208 | 25.13897883 | 22.21567271 | 18.17811192 | 30.1505809  | 32.08811323 | 18.8968657  | 26.38949681 | 11.94243557 | 19.47697142 |
| ENSMUSG00000003131 | -0.06654976  | 6.373508047  | 0.095587668 | 0.757190271 | 0.999071534 | Pafah1b2      | Pafah1b2      | PAFAH1B2 | 82.11063924 | 80.04155995 | 96.87379707 | 93.1801691  | 86.52758899 | 102.2308369 | 99.92041313 | 76.40519235 | 54.13380336 | 63.72499039 |
| ENSMUSG00000032602 | 0.085842075  | 3.913592102  | 0.09556515  | 0.757222463 | 0.999071534 | Slc25a20      | Slc25a20      | SLC25A20 | 13.82546661 | 17.66843323 | 15.887572   | 13.59889288 | 14.25775843 | 14.98900527 | 19.67344922 | 12.08942917 | 14.37806388 | 12.54892118 |
| ENSMUSG00000001445 | 0.065274985  | 6.200240761  | 0.095507254 | 0.757289214 | 0.999071534 | Mrp10         | Mrp10         | MRPL10   | 86.95306156 | 61.66164618 | 79.43786    | 69.65963498 | 74.95133559 | 76.10922095 | 84.51817328 | 63.62493865 | 65.29055239 | 71.30663027 |
| ENSMUSG00000025538 | -0.081004647 | 4.825578359  | 0.095464207 | 0.757342198 | 0.999071534 | Sumf2         | Sumf2         | SUMF2    | 29.61597415 | 26.56193989 | 31.16926202 | 32.67897218 | 30.34678858 | 34.92583753 | 41.09421136 | 21.41556024 | 12.2567102  | 26.47038062 |
| ENSMUSG00000079560 | -0.208023743 | 0.226640089  | 0.0954455   | 0.757365228 | 0.999071534 | Hoxa3         | Hoxa3         | HOXA3    | 0.491260235 | 1.897281421 | 1.413724627 | 0.832585279 | 1.111843547 | 0.727621615 | 0.711868228 | 0.552659619 | 0.707117896 | 1.895409971 |
| ENSMUSG00000020922 | 0.064384253  | 6.121860912  | 0.095435754 | 0.757377227 | 0.999071534 | Lsm12         | Lsm12         | LSM12    | 57.7581676  | 65.27833889 | 82.26530926 | 62.02760325 | 85.87356338 | 84.69515601 | 69.05121814 | 70.11868918 | 54.99805857 | 66.40470794 |
| ENSMUSG00000042506 | -0.07561761  | 5.989221432  | 0.09535543  | 0.757476146 | 0.999071534 | Usp22         | Usp22         | USP22    | 51.30160452 | 96.34632216 | 72.09995599 | 46.34724717 | 72.98925874 | 74.58121556 | 44.32997603 | 77.37234668 | 43.9198782  | 60.19560631 |
| ENSMUSG00000021629 | 0.066321831  | 6.125813545  | 0.095323387 | 0.757515619 | 0.999071534 | Slc30a5       | Slc30a5       | SLC30A5  | 67.51319227 | 65.10046876 | 70.75355158 | 75.48773193 | 74.10110229 | 103.7588423 | 80.63525568 | 52.22633401 | 55.4694705  | 58.49627323 |
| ENSMUSG00000001280 | -0.075038021 | 6.124794339  | 0.095321131 | 0.757518397 | 0.999071534 | Sp1           | Sp1           | SP1      | 54.24916593 | 96.58348234 | 75.60060744 | 54.32618943 | 91.69439136 | 82.87610197 | 52.87239477 | 89.46177585 | 47.14119306 | 58.10411944 |
| ENSMUSG00000033940 | -0.081969316 | 7.565687847  | 0.095292526 | 0.757553642 | 0.999071534 | Brk1          | Brk1          | BRK1     | 226.7516884 | 163.3440723 | 196.9116445 | 250.9550794 | 167.8229731 | 161.0226634 | 233.9457859 | 181.8940972 | 147.6305029 | 157.4497455 |
| ENSMUSG00000028608 | -0.071258338 | 4.933302809  | 0.095270702 | 0.757580536 | 0.999071534 | 0610037L13Rik | 0610037L13Rik | C1orf123 | 34.24785637 | 25.37613901 | 36.82416053 | 38.43768703 | 26.2264272  | 33.61611862 | 33.13423026 | 26.38949681 | 20.11357571 | 31.37230296 |
| ENSMUSG00000036550 | -0.069896405 | 6.500770479  | 0.095267851 | 0.75758405  | 0.999071534 | Cnot1         | Cnot1         | CNOT1    | 99.86618773 | 107.5521406 | 94.45026914 | 92.83325856 | 86.0043685  | 143.4869825 | 84.12988152 | 60.99980546 | 73.77596714 | 73.00596335 |
| ENSMUSG00000086765 | -0.370141659 | -0.655571309 | 0.095252063 | 0.757603508 | 0.999071534 | Gm11827       | Gm11827       |          | 1.263240604 | 0.652190488 | 0           | 0.555056852 | 0.457817931 | 0.072762162 | 0           | 0.759906976 | 0           | 1.241820326 |
| ENSMUSG00000068966 | -0.100759413 | 3.225864393  | 0.0952334   | 0.757626511 | 0.999071534 | Zbtb34        | Zbtb34        | ZBTB34   | 8.491784059 | 8.834216617 | 11.84835878 | 9.85225913  | 10.46440986 | 13.31547556 | 6.083237587 | 8.428059192 | 5.814080477 | 10.32671639 |
| ENSMUSG00000022898 | 0.071954419  | 4.866552216  | 0.095208973 | 0.757656623 | 0.999071534 | Dscr3         | Dscr3         | DSCR3    | 33.2653359  | 37.53059811 | 24.77384109 | 24.07559097 | 27.79608868 | 34.12545375 | 37.85844669 | 24.10977589 | 23.57059653 | 24.83640651 |
| ENSMUSG00000038485 | 0.074173985  | 4.839871847  | 0.095202917 | 0.757664089 | 0.999071534 | Socs7         | Socs7         | SOC5     | 29.33525402 | 30.59366291 | 28.34181276 | 29.00172054 | 26.74964769 | 37.83632399 | 17.02012219 | 27.97839322 | 27.97044121 | 30.45727746 |
| ENSMUSG00000068324 | 0.214879101  | 0.706020978  | 0.095117467 | 0.757769463 | 0.999071534 | Gm10029       | Gm10029       |          | 0.421080201 | 1.660121243 | 1.95228639  | 2.497755836 | 0.523220493 | 1.091432423 | 1.747312924 | 1.243484143 | 0.31427462  | 3.464025119 |
| ENSMUSG00000013663 | -0.067756456 | 6.811114673  | 0.095112095 | 0.757776088 | 0.999071534 | Pten          | Pten          | PTEN     | 118.3937166 | 143.2447473 | 99.56660589 | 108.4442325 | 127.3387874 | 133.6640907 | 126.0006764 | 103.6236786 | 79.59004761 | 91.50255031 |
| ENSMUSG00000038342 | -0.087413363 | 4.466665387  | 0.095101774 | 0.75778882  | 0.999071534 | Mkip          | Mkip          | MLKIP    | 29.47561409 | 31.95733394 | 14.47384737 | 19.56575405 | 22.56388375 | 33.61611862 | 17.79670571 | 25.35326003 | 11.23531768 | 18.16979213 |

|                     |              |              |             |             |             |           |           |          |             |             |             |             |             |             |             |             |             |              |
|---------------------|--------------|--------------|-------------|-------------|-------------|-----------|-----------|----------|-------------|-------------|-------------|-------------|-------------|-------------|-------------|-------------|-------------|--------------|
| ENSMUSG00000033294  | 0.069721869  | 4.849650367  | 0.0950404   | 0.757864543 | 0.999071534 | Noc4l     | Noc4l     | NOC4L    | 30.31777449 | 23.71601776 | 31.50586312 | 29.14048475 | 30.67380139 | 40.01918884 | 29.31602795 | 21.83005496 | 20.27071302 | 33.136995    |
| ENSMUSG00000072812  | 0.095661064  | 6.257241874  | 0.094958146 | 0.757966069 | 0.999071534 | Ahnak2    | Ahnak2    | AHNAK2   | 42.17820016 | 72.86746458 | 77.28361295 | 98.45320919 | 90.19013244 | 60.02878326 | 38.11730786 | 108.4594503 | 76.13302679 | 89.01890966  |
| ENSMUSG00000043015  | 0.123507803  | 2.377187909  | 0.094933987 | 0.757995898 | 0.999071534 | Tmem194b  | Tmem194b  | NEMP2    | 6.035482885 | 4.387463286 | 4.039213221 | 7.007592761 | 3.531738326 | 5.020589145 | 5.500799946 | 5.664761096 | 2.985608894 | 6.470537486  |
| ENSMUSG00000036941  | -0.116070469 | 2.889471904  | 0.094887571 | 0.758053218 | 0.999071534 | Elac1     | Elac1     | ELAC1    | 11.22880537 | 8.241316173 | 6.664701814 | 5.411804311 | 7.979112515 | 10.84156207 | 7.765835218 | 5.872008453 | 6.285492408 | 3.464025119  |
| ENSMUSG00000032244  | 0.061751512  | 5.682256179  | 0.094885518 | 0.758055753 | 0.999071534 | Fem1b     | Fem1b     | FEM1B    | 51.51214462 | 59.52720458 | 47.12415424 | 46.76353981 | 55.72298248 | 60.75640487 | 56.10815945 | 55.61137418 | 34.17736497 | 48.69242856  |
| ENSMUSG00000010067  | -0.075423659 | 6.020818874  | 0.094868136 | 0.758077223 | 0.999071534 | Rassf1    | Rassf1    | RASSF1   | 87.65486189 | 79.44865951 | 59.44375456 | 57.37900212 | 62.39404376 | 94.44528566 | 81.86484625 | 53.33165325 | 29.93465759 | 55.81655569  |
| ENSMUSG00000073600  | -0.157734028 | 1.590682654  | 0.094676385 | 0.758314212 | 0.999071534 | Prob1     | Prob1     | PROB1    | 4.210802013 | 1.48225111  | 3.096730136 | 4.162926393 | 2.746907587 | 2.182864846 | 1.100159989 | 3.730452429 | 2.278490998 | 3.660102012  |
| ENSMUSG00000020431  | -0.219782426 | 0.477950531  | 0.094666208 | 0.758326797 | 0.999071534 | Adcy1     | Adcy1     | ADCY1    | 0.280720134 | 0.770770577 | 2.356207712 | 2.150845303 | 1.438856355 | 1.018670261 | 0.582437641 | 1.036236786 | 2.199922343 | 0.522871716  |
| ENSMUSG00000031971  | -0.107450603 | 3.736007852  | 0.09465105  | 0.758345544 | 0.999071534 | Ccsap     | Ccsap     | CCSAP    | 13.82546661 | 11.02794826 | 19.92678522 | 11.79495811 | 14.51936867 | 23.79322682 | 15.9199622  | 6.770080335 | 10.52819978 | 6.339819557  |
| ENSMUSG00000023367  | -0.109524545 | 3.184199568  | 0.094599417 | 0.758409413 | 0.999071534 | Tmem176a  | Tmem176a  | TMEM176A | 9.825204696 | 7.411255551 | 14.60848781 | 7.701413827 | 8.763943254 | 12.58785394 | 10.09558578 | 6.217420715 | 4.00700141  | 10.06528053  |
| ENSMUSG00000032126  | -0.111757103 | 4.55492368   | 0.094575389 | 0.75843914  | 0.999071534 | Hmbs      | Hmbs      | HMBS     | 43.3010807  | 18.67636399 | 20.1960661  | 24.3531194  | 19.7515736  | 37.98184831 | 39.79990549 | 11.74401691 | 9.506807267 | 14.64040805  |
| ENSMUSG00000031536  | 0.086682219  | 4.51994092   | 0.094556398 | 0.75846264  | 0.999071534 | Polb      | Polb      | POLB     | 27.01931291 | 23.47885759 | 20.5326672  | 20.60648565 | 23.47951961 | 25.24847005 | 39.99405137 | 20.93198308 | 12.72812213 | 16.27438216  |
| ENSMUSG00000045667  | 0.157841777  | 2.548567374  | 0.094502331 | 0.758529556 | 0.999071534 | Smtnl2    | Smtnl2    | SMTNL2   | 2.877381375 | 6.521904885 | 6.664701814 | 3.81601586  | 8.306125323 | 1.45524323  | 3.429910554 | 11.12227484 | 5.735511822 | 6.078383699  |
| ENSMUSG00000005043  | -0.118473015 | 3.509506945  | 0.094448117 | 0.758596676 | 0.999071534 | Sgsh      | Sgsh      | SGSH     | 16.70284798 | 13.81458035 | 9.559471289 | 13.32136446 | 7.325086899 | 21.46483765 | 14.56094103 | 6.424668073 | 4.00700141  | 8.758101244  |
| ENSMUSG00000037103  | 0.075252316  | 5.3036604    | 0.09424498  | 0.758848356 | 0.999071534 | Dcaf15    | Dcaf15    | DCAF15   | 46.31882214 | 24.4274983  | 52.10585054 | 40.51915022 | 35.2519807  | 47.87750228 | 30.09261147 | 37.92626636 | 39.44146486 | 38.82322492  |
| ENSMUSG00000040785  | -0.076592436 | 6.122811535  | 0.094143723 | 0.75897392  | 0.999071534 | Ttc3      | Ttc3      | TTC3     | 52.49466509 | 94.9233611  | 75.465967   | 75.07143929 | 72.00822032 | 56.24515086 | 48.6659007  | 84.83325154 | 64.7405718  | 66.07791311  |
| ENSMUSG00000047434  | 0.119500091  | 4.104484099  | 0.094123912 | 0.758998496 | 0.999071534 | Xxylt1    | Xxylt1    | XXYL1    | 25.05427197 | 21.34441599 | 12.92548231 | 8.950291745 | 17.46248395 | 35.21688618 | 28.47472913 | 8.35897674  | 10.05678785 | 8.169870563  |
| ENSMUSG00000042203  | -0.097609627 | 3.530259799  | 0.093905667 | 0.759269416 | 0.999071534 | Tbc1d22b  | Tbc1d22b  | TBC1D22B | 14.38690688 | 14.2889007  | 12.85816209 | 7.146356975 | 13.01510976 | 14.62519447 | 7.765835218 | 9.80970824  | 7.542590889 | 14.37897219  |
| ENSMUSG00000003585  | 0.188317667  | 0.740015086  | 0.093905493 | 0.759269632 | 0.999071534 | Sec14l2   | Sec14l2   | SEC14L2  | 0.98252047  | 1.422961066 | 2.760129034 | 1.595788451 | 0.654025616 | 2.473913492 | 0.711868228 | 2.486968286 | 1.414235792 | 0.915025503  |
| ENSMUSG00000008682  | 0.085648192  | 8.81821533   | 0.093861137 | 0.759324736 | 0.999071534 | Rpl10     | Rpl10     | RPL10    | 606.4958499 | 418.3505533 | 404.2069208 | 381.601586  | 433.0957629 | 405.2852397 | 412.5599959 | 448.2069511 | 543.1451127 | 733.853277   |
| ENSMUSG000000061143 | -0.085736557 | 4.05169798   | 0.093853907 | 0.759333719 | 0.999071534 | Mam3      | Mam3      | MAML3    | 14.10618674 | 19.15068434 | 15.2143698  | 19.21884351 | 20.07858641 | 21.61036197 | 9.254286968 | 16.09621141 | 13.74951464 | 16.92797181  |
| ENSMUSG00000089936  | -0.096930544 | 3.518586812  | 0.093794641 | 0.759407372 | 0.999071534 | Gm16199   | Gm16199   |          | 8.140883891 | 14.2889007  | 11.10783636 | 13.11321814 | 13.99614818 | 11.71470801 | 9.254286968 | 14.507315   | 7.385453579 | 10.19599846  |
| ENSMUSG00000029994  | -0.064795907 | 6.830462426  | 0.093716763 | 0.759504192 | 0.999071534 | Anxa4     | Anxa4     | ANXA4    | 108.2176117 | 124.2719331 | 119.4260709 | 112.676541  | 139.3074562 | 124.4232962 | 112.0868883 | 105.3507399 | 85.08985437 | 111.8945472  |
| ENSMUSG00000047030  | -0.108685996 | 3.579731435  | 0.093680499 | 0.759549292 | 0.999071534 | Spata2    | Spata2    | SPATA2   | 16.00104765 | 13.87387039 | 10.03071283 | 11.10113705 | 12.88430463 | 25.61228086 | 9.901439902 | 10.50053276 | 4.478413341 | 8.039152634  |
| ENSMUSG00000036534  | 0.094245074  | 3.866449241  | 0.09366112  | 0.759573396 | 0.999071534 | Slc38a7   | Slc38a7   | SLC38A7  | 12.07096577 | 20.81080559 | 11.37711724 | 14.29271395 | 13.99614818 | 16.29872418 | 11.32517636 | 22.38271458 | 9.663944577 | 12.74499808  |
| ENSMUSG00000028998  | 0.087050411  | 7.415435452  | 0.093563917 | 0.759694344 | 0.999071534 | Tomm7     | Tomm7     | TOMM7    | 215.8737832 | 114.6669459 | 166.213624  | 218.137343  | 139.5690664 | 125.8057773 | 178.8083559 | 160.8930316 | 168.1369219 | 196.8612011  |
| ENSMUSG00000037736  | 0.170603501  | 1.311005607  | 0.093563834 | 0.759694447 | 0.999071534 | Limch1    | Limch1    | LIMCH1   | 2.666841275 | 1.185800888 | 4.510454763 | 1.734552664 | 1.373453794 | 3.34705943  | 2.070889391 | 0.828989429 | 2.121353688 | 3.790819941  |
| ENSMUSG00000056383  | 0.089413755  | 4.050384563  | 0.093508166 | 0.759763744 | 0.999071534 | Al987944  | Al987944  | ZNF788   | 19.58022936 | 12.33232924 | 13.39672385 | 19.21884351 | 17.98570444 | 12.00575665 | 18.37914335 | 16.23437631 | 17.59937874 | 15.55543355  |
| ENSMUSG00000022280  | 0.077108685  | 5.61275256   | 0.093496691 | 0.759778031 | 0.999071534 | Rnf19a    | Rnf19a    | RNF19A   | 46.038102   | 74.29042564 | 44.96990719 | 28.30789947 | 54.67654149 | 48.75064822 | 50.99565126 | 63.76310356 | 38.81291562 | 38.62714802  |
| ENSMUSG00000021182  | -0.320391512 | -0.412924995 | 0.093311546 | 0.760008683 | 0.999071534 | Ccdc88c   | Ccdc88c   | CCDC88C  | 0.771980369 | 1.719411288 | 0.605881983 | 0.20814632  | 0.196207685 | 2.037340523 | 0.388291761 | 0           | 0           | 0.522871716  |
| ENSMUSG00000062328  | 0.092941116  | 8.841521939  | 0.093174718 | 0.760179302 | 0.999071534 | Rpl17     | Rpl17     |          | 539.4739178 | 385.6817389 | 454.8154086 | 513.8438811 | 404.5148435 | 262.0165436 | 593.5686718 | 518.2565579 | 460.8051621 | 383.9839165  |
| ENSMUSG00000044499  | 0.124864319  | 2.758572915  | 0.093141918 | 0.760220223 | 0.999071534 | Hs3st5    | Hs3st5    | HS3ST5   | 8.140883891 | 5.988294485 | 5.183656966 | 6.730064335 | 6.932671529 | 3.856394561 | 4.335924663 | 10.36236786 | 7.778296855 | 5.816947841  |
| ENSMUSG00000001482  | -0.093556031 | 4.205343581  | 0.093115527 | 0.760253154 | 0.999071534 | Def8      | Def8      | DEF8     | 26.31751258 | 25.19826887 | 15.34901024 | 10.5460802  | 21.64824789 | 28.81381596 | 19.09101158 | 11.4676871  | 9.506807267 | 19.86912521  |
| ENSMUSG00000046404  | 0.09349333   | 4.25444946   | 0.093000167 | 0.76039716  | 0.999071534 | Yod1      | Yod1      | YOD1     | 15.50978741 | 12.80664959 | 26.32220615 | 22.06350988 | 17.98570444 | 15.78938905 | 13.8490728  | 17.75419027 | 23.49202787 | 20.78415071  |
| ENSMUSG00000043881  | -0.098862546 | 3.351047437  | 0.092995634 | 0.760402821 | 0.999071534 | Kbtbd7    | Kbtbd7    |          | 13.05348624 | 11.85800888 | 10.50195437 | 8.950291745 | 9.810384239 | 10.11394045 | 10.54859284 | 6.148338263 | 11.31388633 | 8.104511599  |
| ENSMUSG00000056268  | 0.075171268  | 4.202969096  | 0.092949198 | 0.760460817 | 0.999071534 | Dennd1b   | Dennd1b   | DENND1B  | 18.10644865 | 19.0913943  | 21.34050985 | 18.80255087 | 14.91178404 | 20.59169171 | 18.76743511 | 17.54694291 | 14.53520119 | 19.41161246  |
| ENSMUSG00000053158  | -0.067900911 | 5.275942271  | 0.09289387  | 0.760529939 | 0.999071534 | Fes       | Fes       | FES      | 42.10802013 | 39.13142931 | 42.88298036 | 37.39695543 | 43.88511883 | 51.51561036 | 25.56254092 | 33.57407186 | 26.79191139 | 47.58132616  |
| ENSMUSG00000007476  | -0.080104377 | 4.521277909  | 0.092865762 | 0.760565064 | 0.999071534 | Lrrc8a    | Lrrc8a    | LRRC8A   | 18.03626862 | 27.03626025 | 30.7653407  | 21.85536356 | 24.06814267 | 37.90908615 | 20.32060215 | 15.47446934 | 16.18514295 | 20.522771485 |
| ENSMUSG000000081382 | -0.135253314 | 4.359846335  | 0.092725808 | 0.760740041 | 0.999071534 | Rpl18-ps1 | Rpl18-ps1 |          | 42.73964043 | 9.486407105 | 20.33070654 | 28.86295632 | 8.894748377 | 14.26138366 | 10.54859284 | 30.94893867 | 7.935434165 | 30.39191849  |

|                     |              |              |             |             |             |               |               |           |             |             |             |             |             |             |             |             |             |             |
|---------------------|--------------|--------------|-------------|-------------|-------------|---------------|---------------|-----------|-------------|-------------|-------------|-------------|-------------|-------------|-------------|-------------|-------------|-------------|
| ENSMUSG00000028882  | 0.115290579  | 5.071202233  | 0.092716208 | 0.760752049 | 0.999071534 | Ppp1r8        | Ppp1r8        | PPP1R8    | 53.96844579 | 33.79532531 | 30.36141937 | 22.41042042 | 27.40367331 | 60.90192919 | 66.39789111 | 13.40199576 | 19.95643839 | 14.90184391 |
| ENSMUSG00000049630  | 0.239785026  | 0.420867218  | 0.092668723 | 0.760811453 | 0.999071534 | C1qI3         | C1qI3         | C1QL3     | 0.771980369 | 0.237160178 | 1.95228639  | 2.01208109  | 0.784830739 | 0.509335131 | 0.647152935 | 0.621742072 | 3.299883514 | 0.71894861  |
| ENSMUSG00000042541  | -0.087713337 | 8.059173295  | 0.092633021 | 0.760856127 | 0.999071534 | Shfm1         | Shfm1         |           | 282.2640949 | 189.6688521 | 337.2743039 | 376.3285459 | 229.890004  | 229.8556682 | 263.9089668 | 203.3787398 | 242.7771443 | 292.4160072 |
| ENSMUSG00000030555  | 0.116350539  | 2.694204475  | 0.092593627 | 0.760905433 | 0.999071534 | Ttc23         | Ttc23         | TTC23     | 8.140883891 | 7.589125684 | 3.971893    | 3.538487434 | 8.633138131 | 8.367648575 | 7.636404631 | 5.733843549 | 5.185531236 | 5.22871716  |
| ENSMUSG00000004462  | -0.094307143 | 3.365600369  | 0.092527975 | 0.760987627 | 0.999071534 | Tbccd1        | Tbccd1        | TBCCD1    | 10.73754513 | 11.50226861 | 8.886269085 | 10.47669809 | 13.01510976 | 12.2968053  | 13.20191987 | 7.737234668 | 6.521198373 | 8.496665386 |
| ENSMUSG00000036529  | -0.069001708 | 6.474906876  | 0.09251915  | 0.760998679 | 0.999071534 | Sbf1          | Sbf1          | SBF1      | 110.7440929 | 104.8247985 | 86.7084438  | 79.85880464 | 91.23657343 | 135.1193339 | 59.86164647 | 78.13225366 | 61.20498232 | 94.37834475 |
| ENSMUSG00000042688  | 0.080483727  | 7.906560297  | 0.092501028 | 0.761021374 | 0.999071534 | Mapk6         | Mapk6         | MAPK6     | 180.4328662 | 282.4577716 | 245.7188042 | 214.4600913 | 288.817712  | 353.4785807 | 198.2229439 | 275.3626552 | 192.257499  | 187.7109461 |
| ENSMUSG00000029247  | 0.086443431  | 7.6256619    | 0.092406357 | 0.761139975 | 0.999071534 | Paics         | Paics         | PAICS     | 214.2596424 | 254.1764204 | 134.5731205 | 166.031381  | 228.9743681 | 236.4042628 | 311.0217005 | 182.9994164 | 114.2388245 | 154.4432331 |
| ENSMUSG00000027166  | 0.092311344  | 3.909080711  | 0.092304588 | 0.761267542 | 0.999071534 | Dnajc24       | Dnajc24       | DNAJC24   | 17.82572852 | 12.74735955 | 11.98299922 | 16.58232347 | 15.63121222 | 15.42557824 | 25.17424916 | 10.98410993 | 10.52819978 | 12.54892118 |
| ENSMUSG00000026880  | -0.080061173 | 5.936752521  | 0.092289204 | 0.761286833 | 0.999071534 | Stom          | Stom          | STOM      | 58.45996794 | 84.72547346 | 54.46205826 | 58.41973371 | 70.63476652 | 53.48018872 | 62.06196645 | 93.26131073 | 29.62038297 | 49.99960785 |
| ENSMUSG00000031781  | -0.087126003 | 6.159995934  | 0.092274344 | 0.761305468 | 0.999071534 | Clapin1       | Clapin1       | CIAPIN1   | 88.84792246 | 65.6933692  | 75.1293659  | 72.15739081 | 80.31434564 | 126.1695881 | 102.2501637 | 35.02480336 | 36.29871866 | 50.52247956 |
| ENSMUSG00000040383  | -0.089795077 | 4.484369375  | 0.092235981 | 0.761353584 | 0.999071534 | Aqr           | Aqr           | AQR       | 28.70363372 | 30.89011314 | 19.11894258 | 13.59889288 | 27.79608868 | 42.27481584 | 15.33752455 | 18.23776743 | 12.57098482 | 20.45735589 |
| ENSMUSG00000039656  | 0.068050194  | 4.902356574  | 0.092233081 | 0.761357222 | 0.999071534 | Rxrb          | Rxrb          | RXRB      | 38.73937852 | 30.65295296 | 23.22547602 | 27.05902155 | 31.65483981 | 40.45576181 | 27.05099267 | 26.73490908 | 26.32049946 | 27.71220095 |
| ENSMUSG00000072761  | -0.188963815 | 1.007083656  | 0.092224768 | 0.76136765  | 0.999071534 | Gm6712        | Gm6712        |           | 2.666841275 | 2.96450222  | 0.538561763 | 2.705902155 | 1.438856355 | 1.746291877 | 4.012348196 | 1.243484143 | 0.628549241 | 0.980384468 |
| ENSMUSG00000004562  | 0.070562888  | 6.71887933   | 0.092219956 | 0.761373686 | 0.999071534 | Arhgef40      | Arhgef40      | ARHGEF40  | 109.1299522 | 97.11709274 | 118.0123463 | 107.0565904 | 100.85075   | 132.8637069 | 70.41023931 | 89.87627056 | 96.24660249 | 132.1558262 |
| ENSMUSG00000035064  | -0.079686083 | 4.604881517  | 0.092211005 | 0.761384916 | 0.999071534 | Eef2k         | Eef2k         | EEF2K     | 22.45761073 | 35.5147366  | 21.20586941 | 22.41042042 | 27.79608868 | 33.17954565 | 17.53784453 | 28.66921774 | 13.43524002 | 23.39850929 |
| ENSMUSG00000025025  | -0.112273033 | 6.110312273  | 0.092177186 | 0.761427349 | 0.999071534 | Mxi1          | Mxi1          | MXI1      | 48.56458321 | 118.9951191 | 67.99342255 | 55.71383156 | 81.88400712 | 33.61611862 | 38.63503021 | 140.3755433 | 40.38428872 | 60.3916832  |
| ENSMUSG00000025856  | 0.091073     | 6.720192102  | 0.092172998 | 0.761432604 | 0.999071534 | Pdgfa         | Pdgfa         | PDGFA     | 95.86592582 | 62.49170681 | 164.059377  | 113.7172726 | 90.84415806 | 104.1954153 | 65.81545347 | 85.45499361 | 128.0669078 | 128.822519  |
| ENSMUSG00000019982  | -0.259869589 | -0.098264514 | 0.092155497 | 0.761454566 | 0.999071534 | Myb           | Myb           | MYB       | 1.263240604 | 1.304380977 | 0.807842644 | 0.624438959 | 0.523220493 | 2.328389169 | 0           | 0.483577167 | 0.628549241 | 0.326794823 |
| ENSMUSG00000027165  | 0.077966213  | 4.165195981  | 0.092152767 | 0.761457992 | 0.999071534 | B230118H07Rik | B230118H07Rik | C11orf74  | 19.43986929 | 16.12689208 | 20.26338632 | 18.17811192 | 15.82741991 | 16.0804377  | 20.25588686 | 17.54694291 | 13.51380868 | 20.58807382 |
| ENSMUSG00000022297  | 0.094389445  | 3.777594244  | 0.092134853 | 0.761480476 | 0.999071534 | Fzd6          | Fzd6          | FZD6      | 15.15888725 | 10.19788764 | 17.70521795 | 12.28063286 | 12.88430463 | 22.92008088 | 17.08483748 | 9.118883716 | 11.07818037 | 9.215613995 |
| ENSMUSG00000000562  | 0.185960991  | 0.677987648  | 0.092117788 | 0.761501896 | 0.999071534 | Adora3        | Adora3        | ADORA3    | 2.877381375 | 1.48225111  | 0.807842644 | 0.763203172 | 1.24264867  | 2.764962138 | 1.164875283 | 1.036236786 | 0.549980586 | 2.352922722 |
| ENSMUSG00000033453  | -0.355678274 | 0.394618536  | 0.092114732 | 0.761505732 | 0.999071534 | Adamts15      | Adamts15      | ADAMTS15  | 4.140621979 | 1.304380977 | 1.211763966 | 0           | 0.261610246 | 4.220205368 | 1.29430587  | 0.207247357 | 0           | 0           |
| ENSMUSG000000050666 | 0.337249088  | -0.512179283 | 0.092089579 | 0.761537309 | 0.999071534 | Vstm4         | Vstm4         | VSTM4     | 0.771980369 | 0.770770577 | 0.538561763 | 0.346910533 | 0.130805123 | 1.164194584 | 2.006174098 | 0           | 0           | 0.065358965 |
| ENSMUSG000000082192 | 0.321654805  | 1.511133301  | 0.09205404  | 0.761581931 | 0.999071534 | Gm14719       | Gm14719       |           | 2.526481208 | 4.802493597 | 0           | 0           | 5.428412612 | 5.093351307 | 4.918362304 | 0           | 1.414235792 | 3.790819941 |
| ENSMUSG00000020257  | 0.067961411  | 6.252527663  | 0.09202503  | 0.761618364 | 0.999071534 | Wdr82         | Wdr82         | WDR82     | 80.42631844 | 68.12426102 | 76.34112987 | 84.36864156 | 75.73616633 | 113.8000206 | 67.69219698 | 51.39734458 | 73.61882983 | 73.39811714 |
| ENSMUSG000000086606 | 0.146918749  | 2.436326996  | 0.09197437  | 0.761681999 | 0.999071534 | Gm13205       | Gm13205       |           | 4.000261912 | 3.083082309 | 9.76143195  | 3.81601586  | 5.363010051 | 3.419821592 | 3.17104938  | 5.664761096 | 3.064177549 | 11.30710086 |
| ENSMUSG000000019826 | 0.087979342  | 4.040361671  | 0.091946045 | 0.761717588 | 0.999071534 | Zbtb24        | Zbtb24        | ZBTB24    | 12.98330621 | 17.01624274 | 14.54116759 | 17.9699656  | 19.48996336 | 13.82481069 | 12.03704459 | 21.13923043 | 12.41384751 | 21.11094554 |
| ENSMUSG00000031913  | 0.061223223  | 5.694650455  | 0.091939384 | 0.761725958 | 0.999071534 | Vps4a         | Vps4a         | VPS4A     | 56.56510703 | 60.35726521 | 48.60519909 | 43.22505238 | 54.54573637 | 58.4280157  | 58.95563236 | 49.11762365 | 34.72734555 | 55.94727362 |
| ENSMUSG000000085055 | 0.168447515  | 1.027742843  | 0.091926273 | 0.761742435 | 0.999071534 | Gm15958       | Gm15958       |           | 1.965040939 | 2.96450222  | 2.625488593 | 0.763203172 | 1.046440986 | 1.600767553 | 1.29430587  | 2.556050739 | 2.121353688 | 1.960768935 |
| ENSMUSG000000041707 | -0.12653359  | 2.615843252  | 0.091892389 | 0.76178502  | 0.999071534 | 1810011H11Rik | 1810011H11Rik | C10orf128 | 10.73754513 | 8.122736084 | 5.654898509 | 3.81601586  | 4.381971627 | 10.11394045 | 6.536244641 | 3.17779281  | 3.221314859 | 5.751588876 |
| ENSMUSG000000019822 | 0.083012001  | 5.198760361  | 0.091791597 | 0.761911748 | 0.999071534 | Smpd2         | Smpd2         | SMPD2     | 35.65145704 | 33.61745518 | 33.12154841 | 36.07869541 | 46.17420849 | 25.83056734 | 21.8737692  | 49.46303591 | 36.29871866 | 43.59442932 |
| ENSMUSG000000019659 | -0.075979715 | 4.49550351   | 0.091640201 | 0.762102245 | 0.999071534 | Ccdc12        | Ccdc12        | CCDC12    | 22.8085109  | 18.97281421 | 29.95749805 | 22.2022741  | 25.57240158 | 29.6869619  | 25.23896446 | 17.408778   | 12.17814154 | 23.52922722 |
| ENSMUSG000000025246 | -0.074933436 | 6.653376348  | 0.091626873 | 0.762119023 | 0.999071534 | Tblix         | Tblix         | TBL1Y     | 80.63685854 | 152.4993942 | 96.33523531 | 76.2509351  | 132.3093821 | 131.4812259 | 77.59363688 | 113.6406342 | 72.20459403 | 83.7901925  |
| ENSMUSG00000029086  | -0.303049844 | -0.642555125 | 0.091579887 | 0.762178183 | 0.999071534 | Prom1         | Prom1         | PROM1     | 0.561440268 | 0.177870133 | 1.750325729 | 0.069382107 | 0.327012808 | 1.091432423 | 0.582437641 | 0.207247357 | 0           | 0.457512752 |
| ENSMUSG000000050786 | 0.124642061  | 2.805765059  | 0.091554569 | 0.762210068 | 0.999071534 | Ccdc126       | Ccdc126       | CCDC126   | 6.667103186 | 6.521904885 | 4.308494102 | 9.991023343 | 6.344048475 | 8.804221544 | 11.51932224 | 2.970545453 | 4.635550651 | 7.25484506  |
| ENSMUSG000000021770 | 0.072554847  | 5.389906767  | 0.091536321 | 0.762233052 | 0.999071534 | Samd8         | Samd8         | SAMD8     | 35.44091694 | 53.30174992 | 42.81566014 | 34.20537853 | 46.23961105 | 37.69079967 | 29.51017383 | 53.19348834 | 36.45585597 | 47.58132616 |
| ENSMUSG000000034278 | 0.10531889   | 3.170814844  | 0.091513802 | 0.762261419 | 0.999071534 | Dnajc17       | Dnajc17       | DNAJC17   | 10.456825   | 6.106874574 | 7.741825339 | 10.96237283 | 8.960150939 | 8.003837767 | 8.154126978 | 7.529987311 | 10.60676844 | 9.084896066 |
| ENSMUSG000000002910 | 0.125249324  | 2.732964267  | 0.091454592 | 0.762336024 | 0.999071534 | Arrdc2        | Arrdc2        | ARRDC2    | 5.614402683 | 5.51397413  | 6.260780492 | 9.158438064 | 5.559217736 | 6.475832375 | 2.847472913 | 5.664761096 | 6.756904338 | 10.65351121 |

|                    |              |              |             |             |             |               |               |                |             |             |             |             |             |             |             |             |             |             |
|--------------------|--------------|--------------|-------------|-------------|-------------|---------------|---------------|----------------|-------------|-------------|-------------|-------------|-------------|-------------|-------------|-------------|-------------|-------------|
| ENSMUSG00000042121 | -0.088732063 | 4.525525079  | 0.091360317 | 0.762454866 | 0.999071534 | Ssh1          | Ssh1          | SSH1           | 17.40464832 | 27.03626025 | 28.94769475 | 21.85536356 | 27.27286819 | 25.61228086 | 9.772009315 | 26.80399153 | 20.97783091 | 23.33315033 |
| ENSMUSG00000068969 | -0.208190158 | 0.293375274  | 0.091203517 | 0.762652673 | 0.999071534 | RpB2-ps       | RpB2-ps       |                | 1.543960738 | 0.355740266 | 2.086926831 | 1.110113705 | 0.981038424 | 0.727621615 | 1.48845175  | 0.345412262 | 0.785686551 | 1.503256184 |
| ENSMUSG00000050299 | -0.083626856 | 9.521563586  | 0.091125001 | 0.762751792 | 0.999071534 | Gm9843        | Gm9843        | FAU            | 953.5361157 | 837.3532972 | 663.912013  | 741.0008979 | 734.5361693 | 565.5075194 | 1020.301317 | 665.7475937 | 464.1050457 | 724.6348395 |
| ENSMUSG00000066113 | 0.338409748  | -0.06347959  | 0.09106538  | 0.76282709  | 0.999071534 | Adamts1       | Adamts1       | ADAMTSL1       | 1.052700503 | 1.245090933 | 1.481044848 | 0           | 0           | 1.309718907 | 1.29430587  | 1.72706131  | 0.235705965 | 0           |
| ENSMUSG00000028416 | -0.072384432 | 7.739374881  | 0.091045282 | 0.762852478 | 0.999071534 | Bag1          | Bag1          | BAG1           | 201.5570563 | 170.2810075 | 177.8600221 | 172.8308274 | 162.7215733 | 183.9427443 | 207.0242238 | 137.6122452 | 110.3103918 | 152.4824642 |
| ENSMUSG00000039783 | -0.18730078  | 1.182380335  | 0.090964653 | 0.762954362 | 0.999071534 | Kmo           | Kmo           | KMO            | 4.491522147 | 1.778701332 | 2.692808814 | 0.20814632  | 2.812310149 | 3.856394561 | 1.617882337 | 0.967154334 | 1.571373102 | 1.960768935 |
| ENSMUSG00000022391 | 0.091166978  | 6.786842848  | 0.090879243 | 0.763062341 | 0.999071534 | Rangap1       | Rangap1       | RANGAP1        | 150.676532  | 75.35764644 | 109.6646389 | 114.9661506 | 103.532255  | 228.836998  | 116.9405353 | 52.15725156 | 91.92532646 | 81.5679877  |
| ENSMUSG00000053293 | -0.063198065 | 5.829357912  | 0.090846032 | 0.763104344 | 0.999071534 | Pom121        | Pom121        | POM121C        | 59.51266844 | 57.39276299 | 57.69342883 | 56.1995063  | 70.56936396 | 88.6970749  | 56.30230533 | 46.56157291 | 38.57720965 | 45.03232654 |
| ENSMUSG00000063358 | -0.074729914 | 7.552507107  | 0.090840326 | 0.763111561 | 0.999071534 | Mapk1         | Mapk1         | MAPK1          | 217.698464  | 247.9509657 | 156.115591  | 180.4628591 | 198.9545924 | 225.7809872 | 210.6482803 | 181.8940972 | 125.1598676 | 150.2602594 |
| ENSMUSG00000043664 | -0.262109124 | -0.293942472 | 0.090750337 | 0.763225416 | 0.999071534 | Tmem221       | Tmem221       | CTD-2521M24.10 | 0.98252047  | 0.770770577 | 0.538561763 | 0.20814632  | 1.373453794 | 0.291048646 | 0.841298815 | 0.483577167 | 0           | 1.372538255 |
| ENSMUSG00000006930 | -0.32647336  | -0.369615628 | 0.090732812 | 0.763247596 | 0.999071534 | Hap1          | Hap1          | HAP1           | 2.035220973 | 1.007930755 | 0.538561763 | 0           | 0.130805123 | 1.600767553 | 0.19414588  | 0.967154334 | 0           | 0.196076894 |
| ENSMUSG00000006262 | 0.074788219  | 5.482251227  | 0.090669252 | 0.763328058 | 0.999071534 | Mob1b         | Mob1b         | MOB1B          | 50.03836392 | 53.36103997 | 41.87317705 | 34.55228906 | 46.50122129 | 68.25090751 | 65.55659229 | 34.19581393 | 23.49202787 | 36.73173805 |
| ENSMUSG00000019873 | 0.07648387   | 6.776745434  | 0.090631728 | 0.763375576 | 0.999071534 | Reep3         | Reep3         | REEP3          | 77.47875703 | 100.6744954 | 126.6966547 | 116.2844106 | 131.132136  | 104.7775126 | 88.59523677 | 115.3676955 | 126.9669466 | 94.6397806  |
| ENSMUSG00000013236 | -0.081350905 | 7.935804351  | 0.090612409 | 0.763400043 | 0.999071534 | Ptprs         | Ptprs         | PTPRS          | 210.5401006 | 295.086551  | 246.4593267 | 268.9944271 | 283.7817148 | 232.1840574 | 153.3105303 | 273.6355939 | 217.6351746 | 258.6254225 |
| ENSMUSG00000050552 | -0.081069107 | 6.022534075  | 0.090578646 | 0.763442811 | 0.999071534 | Lamtor4       | Lamtor4       | LAMTOR4        | 59.65302851 | 48.85499659 | 81.45746661 | 84.92369842 | 69.45752041 | 43.36624827 | 45.36542073 | 69.42786466 | 63.32633601 | 74.90137332 |
| ENSMUSG00000051413 | -0.086095665 | 4.127558216  | 0.090574408 | 0.763448181 | 0.999071534 | Plagl2        | Plagl2        | PLAGL2         | 12.28150587 | 18.14275359 | 20.46534698 | 18.73316877 | 23.02170168 | 24.37532411 | 11.64875283 | 19.61941648 | 9.506807267 | 18.10443317 |
| ENSMUSG00000032609 | 0.173295362  | 1.344456128  | 0.090571243 | 0.763452191 | 0.999071534 | Klhdc8b       | Klhdc8b       | KLHDC8B        | 1.543960738 | 2.075151554 | 2.490848153 | 2.358991623 | 3.27012808  | 1.819054038 | 0.517722348 | 2.348803381 | 2.042785033 | 5.424794054 |
| ENSMUSG00000006021 | -0.110459005 | 2.904559584  | 0.090559658 | 0.763466868 | 0.999071534 | Kptn          | Kptn          | KPTN           | 7.789983723 | 9.249246928 | 5.92417939  | 9.366584384 | 7.194281776 | 8.513172898 | 7.959981098 | 6.977327692 | 2.828471584 | 8.692742279 |
| ENSMUSG00000058794 | -0.294773186 | -0.374336398 | 0.090509396 | 0.763530561 | 0.999071534 | Nfe2          | Nfe2          | NFE2           | 1.614140771 | 0.770770577 | 0.403921322 | 0           | 0.915635862 | 1.236956746 | 0.517722348 | 0           | 0.628549241 | 0.457512752 |
| ENSMUSG00000015656 | -0.078929438 | 9.580576214  | 0.090493408 | 0.763550824 | 0.999071534 | Hspa8         | Hspa8         | HSPA8          | 836.2652797 | 804.6251926 | 780.1067133 | 656.4934922 | 1021.260999 | 803.1487389 | 953.9681412 | 713.2072385 | 430.6347986 | 741.0399396 |
| ENSMUSG00000053646 | 0.121523552  | 3.16012939   | 0.090479678 | 0.763568227 | 0.999071534 | Plxnb1        | Plxnb1        | PLXNB1         | 8.000523824 | 6.877645151 | 11.2424768  | 10.19916966 | 7.259684337 | 17.3901566  | 2.78275762  | 9.187966168 | 7.778296855 | 8.431306421 |
| ENSMUSG00000010914 | 0.089513026  | 4.11399177   | 0.090479616 | 0.763568306 | 0.999071534 | Pdhx          | Pdhx          | PDHX           | 21.47590926 | 16.36405226 | 17.43593707 | 15.19468133 | 16.15443271 | 29.75972406 | 24.72124211 | 10.22420295 | 9.978219197 | 14.1828953  |
| ENSMUSG00000051116 | -0.274670612 | 2.386123478  | 0.090461071 | 0.763591815 | 0.999071534 | Gm8121        | Gm8121        |                | 10.94808523 | 4.861783641 | 0           | 6.799446442 | 6.344048475 | 9.459080998 | 8.9307105   | 4.490359406 | 0           | 1.111102397 |
| ENSMUSG00000053198 | -0.135189708 | 2.336365463  | 0.090370053 | 0.763707237 | 0.999071534 | Prx           | Prx           | PRX            | 7.649623656 | 6.403324796 | 3.366011017 | 4.787365352 | 4.578179312 | 11.05984855 | 3.235764674 | 2.348803381 | 2.514196693 | 4.901922338 |
| ENSMUSG00000082029 | -0.348751535 | 4.777198846  | 0.090354251 | 0.763727281 | 0.999071534 | H3f3c         | H3f3c         |                | 44.63450133 | 51.16730832 | 9.626791509 | 1.734552664 | 54.80734662 | 42.20205368 | 81.4118392  | 0           | 0           | 1.503256184 |
| ENSMUSG00000069456 | 0.196415753  | 0.179516509  | 0.090226102 | 0.76388991  | 0.999071534 | Rdh16         | Rdh16         | RDH16          | 0.912340436 | 1.660121243 | 1.009803305 | 0.416292639 | 0.850233301 | 1.018670261 | 0.647152935 | 1.657978857 | 0.707117896 | 1.111102397 |
| ENSMUSG00000032119 | 0.152681885  | 1.456185967  | 0.090215885 | 0.763902882 | 0.999071534 | Hinfp         | Hinfp         | HINFP          | 3.158101509 | 3.557402664 | 2.288887492 | 1.526406344 | 2.354492217 | 5.311637791 | 3.041618794 | 2.210638477 | 0.707117896 | 2.745076509 |
| ENSMUSG00000020929 | 0.075820828  | 6.365104371  | 0.090208665 | 0.763912049 | 0.999071534 | Eftud2        | Eftud2        | EFTUD2         | 103.1646493 | 95.27910136 | 75.19668612 | 65.01103384 | 79.00629441 | 151.4908203 | 94.48432848 | 50.3611078  | 63.40490466 | 61.89493939 |
| ENSMUSG00000058444 | -0.102980341 | 3.410637644  | 0.090136568 | 0.76400361  | 0.999071534 | Map2k5        | Map2k5        | MAP2K5         | 18.52752886 | 12.09516906 | 8.078426441 | 6.799446442 | 11.44544828 | 15.1345296  | 11.97232929 | 7.737234668 | 6.756904338 | 8.496665386 |
| ENSMUSG00000028635 | 0.180118326  | 5.272837361  | 0.090123433 | 0.764020295 | 0.999071534 | Edn2          | Edn2          | EDN2           | 19.58022936 | 67.11633027 | 29.01501497 | 36.28684173 | 35.44818839 | 3.274297269 | 12.36062105 | 122.2759407 | 26.16336215 | 24.57497065 |
| ENSMUSG00000032171 | 0.154853731  | 4.752378304  | 0.090113144 | 0.764033365 | 0.999071534 | Pin1          | Pin1          | PIN1           | 38.24811828 | 36.22621713 | 17.03201575 | 16.23541293 | 25.04918109 | 47.80474012 | 71.57511459 | 13.81649048 | 4.00700141  | 8.039152634 |
| ENSMUSG00000025439 | 0.080923943  | 6.396893495  | 0.089959741 | 0.764228343 | 0.999071534 | Clns1a        | Clns1a        | CLNS1A         | 121.341278  | 70.67373293 | 71.69603466 | 84.29925946 | 76.91341244 | 107.5424747 | 141.0793398 | 53.05532344 | 55.62606781 | 68.23475894 |
| ENSMUSG00000081309 | -0.455988414 | -0.908571688 | 0.089908685 | 0.764293276 | 0.999071534 | Gm12397       | Gm12397       |                | 0.912340436 | 0.059290044 | 0           | 0           | 1.438856355 | 0.436572969 | 1.229590576 | 0           | 0           | 0           |
| ENSMUSG00000024527 | -0.072956987 | 5.381510665  | 0.089894761 | 0.764310988 | 0.999071534 | Afg3l2        | Afg3l2        | AFG3L2         | 52.00340485 | 61.54306609 | 35.34311568 | 25.53261521 | 48.5287007  | 53.26190223 | 41.22364195 | 42.76203803 | 24.51342039 | 37.58140459 |
| ENSMUSG00000028044 | 0.094930485  | 7.223329756  | 0.089868392 | 0.764344534 | 0.999071534 | Cks1b         | Cks1b         | CKS1B          | 194.1179728 | 74.52758582 | 184.5920442 | 157.4973819 | 137.4761845 | 219.8872521 | 225.0797907 | 81.03371666 | 120.9957289 | 111.7638293 |
| ENSMUSG00000080717 | 0.207380693  | 0.363239664  | 0.089840932 | 0.764379475 | 0.999071534 | B230307C23Rik | B230307C23Rik | ZNF69          | 0.701800335 | 1.007930755 | 2.423527932 | 0.555056852 | 0.850233301 | 1.45524323  | 2.200319978 | 0.345412262 | 0.471411931 | 1.633974113 |
| ENSMUSG00000014592 | 0.113174433  | 2.883868086  | 0.089778674 | 0.764458714 | 0.999071534 | Camta1        | Camta1        | CAMTA1         | 5.052962415 | 6.106874574 | 11.37711724 | 7.146356975 | 6.344048475 | 5.893735083 | 7.053966989 | 9.878790692 | 5.971217787 | 7.124127131 |
| ENSMUSG00000038042 | 0.082525603  | 4.311501255  | 0.089776372 | 0.764461644 | 0.999071534 | Ptpdc1        | Ptpdc1        | PTPDC1         | 19.29950922 | 15.59328168 | 24.30259954 | 19.84328247 | 20.27479409 | 15.78938905 | 14.17264927 | 22.31363212 | 18.62077126 | 25.29391926 |
| ENSMUSG00000041161 | 0.136470499  | 2.105841903  | 0.089661141 | 0.764608388 | 0.999071534 | Otud3         | Otud3         | OTUD3          | 3.438821644 | 6.166164618 | 4.645095204 | 1.80393477  | 4.708984435 | 7.931075606 | 3.559341141 | 3.108710358 | 1.964216377 | 5.490153018 |

|                     |              |              |             |             |             |               |               |            |             |             |             |             |             |             |             |             |             |             |
|---------------------|--------------|--------------|-------------|-------------|-------------|---------------|---------------|------------|-------------|-------------|-------------|-------------|-------------|-------------|-------------|-------------|-------------|-------------|
| ENSMUSG00000028948  | 0.103750546  | 4.395519073  | 0.089575729 | 0.764717223 | 0.999071534 | NoI9          | NoI9          | NOL9       | 31.30029496 | 22.17447661 | 17.16665619 | 19.01069719 | 15.23879685 | 46.78606986 | 24.8506727  | 9.947873145 | 8.721120716 | 21.24166346 |
| ENSMUSG00000020282  | 0.066168164  | 5.801068996  | 0.089537573 | 0.764765861 | 0.999071534 | Rhddf1        | Rhddf1        | RHDF1      | 55.79312667 | 57.33347294 | 58.83787258 | 50.23264514 | 60.30116179 | 62.72098323 | 35.01097377 | 61.13797037 | 45.4912513  | 70.45696374 |
| ENSMUSG00000079067  | -0.443526577 | 2.42537653   | 0.089518728 | 0.764789888 | 0.999071534 | Hmgn2-ps1     | Hmgn2-ps1     |            | 15.08870721 | 7.52983564  | 0           | 0           | 9.352566308 | 12.87890259 | 11.06631518 | 0           | 0           | 0           |
| ENSMUSG00000050334  | 0.126476251  | 3.038467282  | 0.089510087 | 0.764800904 | 0.999071534 | C130071C03Rik | C130071C03Rik |            | 5.54422265  | 6.818355107 | 9.290190407 | 10.96237283 | 7.194281776 | 7.64002696  | 5.436084652 | 4.421276953 | 14.14235792 | 7.25484506  |
| ENSMUSG00000021614  | -0.077456315 | 7.173808892  | 0.089494535 | 0.764820736 | 0.999071534 | Vcan          | Vcan          | VCAN       | 112.4284137 | 178.2258735 | 138.5450135 | 162.2153651 | 176.5215137 | 123.7684367 | 117.1993965 | 179.6834587 | 124.374181  | 123.332366  |
| ENSMUSG00000085479  | -0.327803866 | -0.386535353 | 0.089479004 | 0.764840541 | 0.999071534 | 9430073C21Rik | 9430073C21Rik |            | 1.965040939 | 0           | 1.144443746 | 0           | 0.588623054 | 0.145524323 | 0.647152935 | 0.345412262 | 0.15713731  | 1.372538255 |
| ENSMUSG00000041734  | -0.072392568 | 7.427529701  | 0.089470832 | 0.764850964 | 0.999071534 | Kirrel        | Kirrel        | KIRREL     | 178.3976453 | 208.4045061 | 167.1561071 | 158.6074956 | 205.0370306 | 264.4904571 | 148.845175  | 150.876076  | 117.538708  | 148.6916442 |
| ENSMUSG00000025724  | 0.068404419  | 6.464544773  | 0.089454113 | 0.764872288 | 0.999071534 | Sec11a        | Sec11a        | SEC11A     | 102.603209  | 84.90334359 | 78.89929824 | 87.07454372 | 93.85267589 | 95.75500456 | 130.8543234 | 77.44142913 | 57.51225553 | 78.69219326 |
| ENSMUSG00000039997  | -0.083662154 | 4.499046202  | 0.08933531  | 0.765023878 | 0.999071534 | Ifi203        | Ifi203        |            | 19.51004932 | 26.50264985 | 26.45684659 | 26.71211102 | 20.40559922 | 25.10294573 | 10.48387754 | 23.69528117 | 20.89926226 | 24.57497065 |
| ENSMUSG00000021590  | -0.187217322 | 0.598353199  | 0.08926026  | 0.765119696 | 0.999071534 | Spat9         | Spat9         | SPATA9     | 1.684320805 | 0.355740266 | 0.942483085 | 2.150845303 | 2.485297341 | 1.018670261 | 1.68259763  | 1.174401691 | 0.942823861 | 1.372538255 |
| ENSMUSG00000054951  | -0.143548493 | 1.825483895  | 0.08922361  | 0.765166505 | 0.999071534 | 9130008F23Rik | 9130008F23Rik | C6orf141   | 3.579181711 | 4.268883197 | 3.90457278  | 2.705902155 | 4.185763942 | 2.837724299 | 5.112508185 | 3.937699786 | 2.592765618 | 1.045743432 |
| ENSMUSG00000061353  | -0.099227723 | 8.127408991  | 0.089162328 | 0.765244795 | 0.999071534 | Cxcl12        | Cxcl12        | CXCL12     | 205.2765981 | 280.7976503 | 365.9527178 | 359.468694  | 280.7731969 | 625.5363026 | 218.5435461 | 172.9133783 | 183.0649664 | 177.7763835 |
| ENSMUSG00000002963  | -0.094594158 | 4.192410882  | 0.08911573  | 0.765304346 | 0.999071534 | Pnkp          | Pnkp          | PNKP       | 33.96713623 | 17.4905631  | 13.66600473 | 16.23541293 | 16.41604296 | 28.45000516 | 21.55019273 | 9.326131073 | 12.33527885 | 15.62079252 |
| ENSMUSG00000021993  | 0.095255376  | 4.597017883  | 0.089110585 | 0.765310922 | 0.999071534 | Mipep         | Mipep         | MIPPEP     | 37.33577784 | 23.53814763 | 15.887572   | 21.50845303 | 23.02170168 | 24.44808627 | 45.10655956 | 14.78364481 | 13.90665195 | 23.39850929 |
| ENSMUSG00000037060  | -0.070085061 | 6.4906044    | 0.089109419 | 0.765312412 | 0.999071534 | Prkcdbp       | Prkcdbp       | PRKCDBP    | 80.21577834 | 68.3614212  | 107.241111  | 101.0203471 | 119.8828954 | 77.70998851 | 83.61215918 | 97.19901052 | 68.19759262 | 93.46331924 |
| ENSMUSG00000024451  | 0.090518466  | 4.271557733  | 0.089065592 | 0.765368439 | 0.999071534 | Arap3         | Arap3         | ARAP3      | 20.77328993 | 24.60536843 | 18.64770103 | 13.52951078 | 19.35915823 | 28.23171867 | 15.27280926 | 11.88218181 | 10.76390575 | 32.15661054 |
| ENSMUSG00000032637  | -0.078469014 | 6.107215805  | 0.089006692 | 0.765443759 | 0.999071534 | Atxn2l        | Atxn2l        | ATXN2L     | 78.6718176  | 91.42524848 | 63.34832734 | 45.93095454 | 90.19013244 | 98.08339373 | 39.6704749  | 79.99747987 | 37.71295445 | 76.01247572 |
| ENSMUSG00000085586  | -0.124092091 | 2.529193668  | 0.088993231 | 0.765460977 | 0.999071534 | Gm11613       | Gm11613       |            | 8.421604025 | 7.351965506 | 4.039213221 | 5.134275885 | 5.690022859 | 2.837724299 | 4.335924663 | 7.046410144 | 5.566943167 | 5.294076125 |
| ENSMUSG00000026730  | -0.083563134 | 4.137379219  | 0.088854301 | 0.765638758 | 0.999071534 | Pter          | Pter          | PTER       | 15.01852718 | 14.76322106 | 20.5326672  | 19.0800793  | 23.80653242 | 17.17187012 | 22.65035272 | 15.05997462 | 15.08518178 | 11.50317775 |
| ENSMUSG00000031799  | 0.0826379    | 10.22428194  | 0.08878743  | 0.765724384 | 0.999071534 | Tpm4          | Tpm4          | TPM4       | 1193.55183  | 1581.621225 | 1008.052979 | 972.3902233 | 1297.717627 | 1486.53096  | 1742.1357   | 1140.620371 | 722.0459403 | 956.5938045 |
| ENSMUSG00000030406  | 0.331339311  | -0.533983425 | 0.088786789 | 0.765725205 | 0.999071534 | Gipr          | Gipr          | GIPR       | 0.280720134 | 0.711480533 | 1.144443746 | 0.20814632  | 0.196207685 | 0           | 0.129430587 | 1.312566595 | 0           | 1.503256184 |
| ENSMUSG00000026640  | -0.106477956 | 3.037221092  | 0.08874808  | 0.765774786 | 0.999071534 | Plkna2        | Plkna2        | PLXNA2     | 5.403862583 | 11.26510844 | 8.280387102 | 11.03175494 | 7.194281776 | 10.69603774 | 5.500799946 | 6.770080335 | 6.914041649 | 7.97379367  |
| ENSMUSG00000020652  | -0.138924598 | 2.900072184  | 0.088684451 | 0.765856313 | 0.999071534 | Cenpo         | Cenpo         | CENPO      | 9.474304528 | 5.336103997 | 6.193460271 | 10.82360862 | 7.848307392 | 14.84348095 | 7.830550511 | 7.599069763 | 1.099961171 | 4.705845444 |
| ENSMUSG00000022089  | 0.068418895  | 5.681130522  | 0.088672968 | 0.76587103  | 0.999071534 | Bin3          | Bin3          | BIN3       | 71.44327415 | 41.20658086 | 42.81566014 | 40.17223969 | 65.20635391 | 47.95026444 | 58.5673406  | 45.52533613 | 43.05652299 | 56.40478637 |
| ENSMUSG00000040612  | -0.185802101 | 0.553702019  | 0.088586283 | 0.765982156 | 0.999071534 | Ildr2         | Ildr2         | ILDR2      | 0.771980369 | 1.600831199 | 0.942483085 | 2.775284262 | 1.177246109 | 0.800383777 | 1.423736457 | 2.003391119 | 0.864255206 | 0.849666539 |
| ENSMUSG00000024505  | 0.139651851  | 1.787294701  | 0.088531656 | 0.766052216 | 0.999071534 | Dtwd2         | Dtwd2         | DTWD2      | 2.315941107 | 2.786632087 | 2.356207712 | 3.885397967 | 5.035997243 | 3.638108076 | 2.329750565 | 2.625133191 | 4.635550651 | 3.202589261 |
| ENSMUSG00000029101  | -0.089525979 | 3.891577583  | 0.088529479 | 0.766055008 | 0.999071534 | Rgs12         | Rgs12         | RGS12      | 18.59770889 | 18.5577839  | 15.01240914 | 10.40731598 | 16.61225065 | 22.92008088 | 8.801279913 | 12.98750105 | 8.721120716 | 17.45084352 |
| ENSMUSG00000031960  | -0.076234392 | 7.153862987  | 0.088518324 | 0.766069318 | 0.999071534 | Aars          | Aars          | AARS       | 145.0621293 | 129.3115869 | 183.9861622 | 125.9285234 | 175.3442676 | 250.5201221 | 113.3811942 | 108.3903678 | 97.34656367 | 122.6787764 |
| ENSMUSG00000015341  | 0.064745798  | 6.794278716  | 0.088509294 | 0.766080903 | 0.999071534 | Golga7        | Golga7        | GOLGA7     | 117.6217362 | 101.445266  | 117.945026  | 114.8273863 | 110.1379137 | 106.8148531 | 121.9883282 | 103.6236786 | 95.06807267 | 116.4696747 |
| ENSMUSG00000031595  | 0.157990129  | 1.466693146  | 0.088467159 | 0.766134966 | 0.999071534 | Pdgfri        | Pdgfri        | PDGFRL     | 3.509001677 | 3.735272798 | 1.95228639  | 2.289609516 | 1.438856355 | 3.056010784 | 4.46535525  | 0.828989429 | 2.907040239 | 2.091486864 |
| ENSMUSG00000045827  | -0.091645298 | 4.720492437  | 0.088435454 | 0.766175655 | 0.999071534 | Serpinb9      | Serpinb9      | SERPINB9   | 40.14297919 | 37.47130807 | 20.26338632 | 22.75733095 | 20.40559922 | 37.83632399 | 38.6997455  | 15.19813953 | 12.41384751 | 22.87563758 |
| ENSMUSG00000050513  | -0.068854834 | 4.877385194  | 0.088396687 | 0.766225417 | 0.999071534 | Agap1         | Agap1         | AGAP1      | 29.33525402 | 30.53437287 | 25.44704329 | 29.41801318 | 41.07280868 | 38.70946993 | 20.8383245  | 25.76775474 | 23.33489056 | 30.71871332 |
| ENSMUSG00000026409  | -0.109978091 | 2.804951775  | 0.088390706 | 0.766233095 | 0.999071534 | Pfkfb2        | Pfkfb2        | PFKFB2     | 5.403862583 | 7.707705773 | 10.97319592 | 6.03624327  | 6.801866406 | 5.457162114 | 6.406814054 | 8.08264693  | 4.478413341 | 7.25484506  |
| ENSMUSG000000074576 | -0.178409855 | 1.719676807  | 0.088325357 | 0.766317011 | 0.999071534 | Mocs3         | Mocs3         | MOCS3      | 4.000261912 | 5.158233863 | 3.769932339 | 0.901967385 | 3.727946011 | 5.23887563  | 4.724216424 | 3.523205072 | 0.31427462  | 1.30717929  |
| ENSMUSG00000003226  | 0.071122379  | 7.025765486  | 0.088320525 | 0.766323217 | 0.999071534 | Ranbp2        | Ranbp2        | RANBP2     | 109.6212124 | 175.0835011 | 108.2509143 | 122.8757107 | 144.0164406 | 166.1887769 | 145.7388409 | 123.9339196 | 110.3103918 | 101.8946257 |
| ENSMUSG000000009733 | 0.078117379  | 4.047593248  | 0.088249884 | 0.766413968 | 0.999071534 | Tfcp2         | Tfcp2         | TFCP2      | 18.03626862 | 16.4233423  | 17.16665619 | 16.72108768 | 14.38856355 | 16.0804377  | 13.46078104 | 16.30345876 | 15.94943698 | 18.62730488 |
| ENSMUSG00000031591  | -0.104401784 | 6.684336822  | 0.088242861 | 0.766422993 | 0.999071534 | Asah1         | Asah1         | ASAH1      | 122.3237985 | 176.0321418 | 60.92479941 | 83.11976365 | 113.2118341 | 130.8991286 | 190.1335322 | 74.33271878 | 34.41307093 | 65.94719519 |
| ENSMUSG00000000301  | 0.130569324  | 1.870940679  | 0.088228167 | 0.766441875 | 0.999071534 | Pemt          | Pemt          | PEMT       | 4.140621979 | 2.786632087 | 5.116336746 | 2.705902155 | 2.746907587 | 3.638108076 | 5.306654065 | 2.694215643 | 2.671334273 | 3.529384083 |
| ENSMUSG00000036835  | 0.08442658   | 5.997883752  | 0.088228054 | 0.76644202  | 0.999071534 | Psenen        | Psenen        | AC002398.9 | 44.1432411  | 52.70884948 | 72.77315819 | 78.4017804  | 71.68120751 | 39.50985371 | 47.24216424 | 87.38930228 | 58.84792267 | 75.75103986 |

|                    |              |              |             |             |             |               |               |          |             |             |             |             |             |             |             |             |             |             |
|--------------------|--------------|--------------|-------------|-------------|-------------|---------------|---------------|----------|-------------|-------------|-------------|-------------|-------------|-------------|-------------|-------------|-------------|-------------|
| ENSMUSG00000021820 | 0.064853942  | 5.463417183  | 0.08819636  | 0.766482756 | 0.999071534 | Camk2g        | Camk2g        | CAMK2G   | 37.05505771 | 47.07629526 | 50.35552482 | 42.3924671  | 46.17420849 | 47.14988067 | 34.6873973  | 49.0485412  | 42.81991703 | 41.4375835  |
| ENSMUSG00000025337 | 0.070697189  | 6.041069231  | 0.088195615 | 0.766483714 | 0.999071534 | Sbds          | Sbds          | SBDS     | 49.68746375 | 62.19525658 | 82.46726992 | 66.05176543 | 71.81201263 | 49.98760497 | 64.58586289 | 77.57959404 | 55.94088243 | 72.02557888 |
| ENSMUSG00000059751 | 0.137708019  | 1.53479025   | 0.088177369 | 0.766507168 | 0.999071534 | Rps3a3        | Rps3a3        |          | 2.245761073 | 2.905212176 | 3.298690797 | 2.705902155 | 2.485297341 | 1.673529715 | 3.365195261 | 2.763298096 | 2.671334273 | 3.202589261 |
| ENSMUSG00000034266 | -0.153383428 | 1.552649279  | 0.088130028 | 0.766568035 | 0.999071534 | Batf          | Batf          | BATF     | 3.438821644 | 3.557402664 | 3.500651458 | 3.122194795 | 1.63506404  | 3.201535107 | 2.78275762  | 0.828989429 | 1.571373102 | 4.64048648  |
| ENSMUSG00000026024 | -0.089668562 | 3.894660904  | 0.088105334 | 0.766599792 | 0.999071534 | Als2          | Als2          | ALS2     | 18.73806896 | 19.56571465 | 10.77123525 | 10.40731598 | 20.01318385 | 22.41074575 | 12.36062105 | 15.19813953 | 7.85686551  | 13.26786979 |
| ENSMUSG00000041548 | 0.074200535  | 6.594298926  | 0.088096286 | 0.76661143  | 0.999071534 | Hspb8         | Hspb8         | HSPB8    | 94.11142498 | 135.1220112 | 72.97511885 | 71.32480553 | 117.2013904 | 93.64490188 | 132.9899281 | 100.9294629 | 60.02645249 | 93.13652442 |
| ENSMUSG00000026786 | -0.068591507 | 5.608758899  | 0.088079169 | 0.766633446 | 0.999071534 | Apbb1ip       | Apbb1ip       | APBB1IP  | 41.40621979 | 53.77607028 | 49.61500239 | 49.05314933 | 64.94474366 | 56.39067518 | 28.28058325 | 46.42340801 | 45.72695727 | 51.63358196 |
| ENSMUSG00000070737 | 0.1356362    | 3.277449149  | 0.088062696 | 0.766654636 | 0.999071534 | Gm12942       | Gm12942       | TMEM358  | 6.73728322  | 5.158233863 | 10.29999371 | 17.20676242 | 7.194281776 | 3.929156722 | 5.630230533 | 13.26383086 | 11.86386692 | 11.37245982 |
| ENSMUSG00000037085 | 0.119390647  | 2.977973658  | 0.088022261 | 0.76670666  | 0.999071534 | Trmt12        | Trmt12        | TRMT12   | 6.73728322  | 10.13859759 | 3.164050356 | 8.325852786 | 10.20279961 | 10.4049891  | 9.707294022 | 7.253657501 | 3.064177549 | 9.673126747 |
| ENSMUSG00000054293 | 0.088604594  | 3.976466085  | 0.088009856 | 0.766722623 | 0.999071534 | A630033H20Rik | A630033H20Rik |          | 18.03626862 | 13.45884008 | 13.39672385 | 15.68035608 | 18.051107   | 12.58785394 | 25.10953387 | 15.75079915 | 10.13535651 | 13.9868184  |
| ENSMUSG00000029777 | -0.078042924 | 7.043277118  | 0.087987222 | 0.766751753 | 0.999071534 | Gars          | Gars          | GARS     | 167.5197401 | 137.9679333 | 140.833901  | 120.2391906 | 137.6069896 | 220.9786845 | 155.3167044 | 74.67813104 | 91.84675781 | 96.79662643 |
| ENSMUSG00000020198 | 0.070708368  | 6.581217256  | 0.087905789 | 0.766856587 | 0.999071534 | Ap3d1         | Ap3d1         | AP3D1    | 89.7602629  | 112.8882446 | 78.56269714 | 88.53156796 | 115.4355212 | 110.3074369 | 59.08506295 | 113.2952219 | 85.08985347 | 103.7900356 |
| ENSMUSG00000049680 | -0.071816276 | 4.79770405   | 0.087859327 | 0.766916424 | 0.999071534 | Urgcp         | Urgcp         | URGCP    | 36.77433758 | 32.01662398 | 25.71632417 | 21.1615425  | 32.43967055 | 39.58261587 | 30.28675735 | 18.16868498 | 19.2493205  | 25.94750891 |
| ENSMUSG00000026308 | -0.125273336 | 3.037515607  | 0.087817553 | 0.766970239 | 0.999071534 | Klh30         | Klh30         | KLHL30   | 4.56170218  | 9.901437416 | 13.80064517 | 7.84017804  | 7.521294584 | 7.421740475 | 3.365195261 | 12.36575898 | 4.635550651 | 9.542408818 |
| ENSMUSG00000025735 | 0.216914101  | 1.481693878  | 0.087803914 | 0.766987811 | 0.999071534 | Rhbd1l        | Rhbd1l        | RHBDL1   | 5.965302851 | 0.059290044 | 4.375814322 | 0.693821065 | 1.831271725 | 1.45524323  | 2.588611739 | 4.006782239 | 1.335667137 | 4.313691657 |
| ENSMUSG00000026674 | -0.070338331 | 7.412748049  | 0.087648726 | 0.767187869 | 0.999071534 | Ddr2          | Ddr2          | DDR2     | 147.7289706 | 203.8391727 | 161.4338884 | 192.743492  | 198.4313719 | 206.3534901 | 165.606436  | 143.8296659 | 124.374181  | 170.3254615 |
| ENSMUSG00000057842 | 0.135933846  | 1.837935552  | 0.087642967 | 0.767195297 | 0.999071534 | Zfp595        | Zfp595        |          | 2.035220973 | 2.608761954 | 4.577774983 | 3.399723221 | 4.381971627 | 2.764962138 | 4.530070544 | 2.417885834 | 3.928432755 | 3.398666154 |
| ENSMUSG00000060981 | -0.184315654 | 1.531523659  | 0.087606726 | 0.767242045 | 0.999071534 | Hist1h4h      | Hist1h4h      |          | 2.526481208 | 2.845922132 | 4.375814322 | 1.248877918 | 4.381971627 | 0.727621615 | 0.711868228 | 5.18118393  | 3.457020824 | 1.633974113 |
| ENSMUSG00000051495 | -0.079790041 | 7.170080808  | 0.087581791 | 0.767274215 | 0.999071534 | Irf2bp2       | Irf2bp2       | IRF2BP2  | 137.2019656 | 129.9044873 | 192.4011897 | 130.3689782 | 178.7452008 | 142.7593609 | 79.08208863 | 163.3109175 | 139.5379315 | 141.3060813 |
| ENSMUSG00000022295 | -0.074167518 | 6.660348449  | 0.087538819 | 0.767329669 | 0.999071534 | Atp6v1c1      | Atp6v1c1      | ATP6V1C1 | 131.0261226 | 125.8727643 | 86.3718427  | 91.79252696 | 104.5132934 | 114.6731666 | 147.4861538 | 94.64295978 | 56.09801974 | 70.39160477 |
| ENSMUSG00000022159 | -0.094678499 | 3.959709236  | 0.087531047 | 0.767339701 | 0.999071534 | Rab2b         | Rab2b         | RAB2B    | 10.8779052  | 13.93316044 | 19.99410544 | 20.05142879 | 17.39708138 | 11.78747017 | 11.51932224 | 22.52087948 | 9.585375922 | 16.14366423 |
| ENSMUSG00000036995 | 0.117410785  | 3.075819145  | 0.08750029  | 0.767379402 | 0.999071534 | Asap3         | Asap3         | ASAP3    | 7.71980369  | 9.308536972 | 9.89607239  | 3.399723221 | 11.38004572 | 8.731459383 | 4.012348196 | 9.878790692 | 7.85686551  | 10.84958811 |
| ENSMUSG00000040225 | 0.07982709   | 6.745738224  | 0.087454794 | 0.767438142 | 0.999071534 | Prrc2c        | Prrc2c        | PRRC2C   | 76.77695669 | 113.3032749 | 107.6450323 | 103.2405745 | 140.3538972 | 128.1341664 | 53.584263   | 129.1151035 | 88.46830564 | 133.3322876 |
| ENSMUSG00000046006 | -0.229785976 | 0.333421185  | 0.087254479 | 0.767696971 | 0.999071534 | Gapt          | Gapt          | GAPT     | 2.17558104  | 1.007930755 | 0           | 1.248877918 | 1.896674286 | 1.964578361 | 1.100159989 | 0.483577167 | 0.549980586 | 1.111102397 |
| ENSMUSG00000028693 | 0.071004268  | 6.176888899  | 0.087182958 | 0.767789462 | 0.999071534 | Nasp          | Nasp          | NASP     | 66.3201317  | 50.45582779 | 88.18948865 | 78.26301619 | 81.62239687 | 106.305518  | 83.28858271 | 45.52533613 | 59.71217787 | 68.4961948  |
| ENSMUSG00000053080 | 0.07531878   | 5.106306018  | 0.087177591 | 0.767796404 | 0.999071534 | 2700081O15Rik | 2700081O15Rik | C11orf95 | 21.19437013 | 31.83875385 | 43.21958146 | 39.61718284 | 36.82164218 | 43.51177259 | 23.10335977 | 41.31130653 | 26.55620542 | 36.73173805 |
| ENSMUSG00000050147 | 0.129332009  | 1.602035769  | 0.087158514 | 0.767821082 | 0.999071534 | F2r3          | F2r3          | F2RL3    | 3.438821644 | 2.786632087 | 3.096730136 | 2.358991623 | 2.746907587 | 3.056010784 | 3.106334087 | 2.417885834 | 3.221314859 | 2.679717545 |
| ENSMUSG00000001247 | -0.13782549  | 2.163698973  | 0.087121522 | 0.767868944 | 0.999071534 | Lsr           | Lsr           | LSR      | 7.509263589 | 3.913142931 | 6.058819831 | 1.873316877 | 4.51277675  | 6.548594537 | 1.68259763  | 4.766689215 | 3.614158135 | 3.660102012 |
| ENSMUSG00000061046 | -0.110108895 | 4.062751063  | 0.087112238 | 0.767880958 | 0.999071534 | Haghl         | Haghl         | HAGHL    | 12.84294614 | 15.17825137 | 23.69671756 | 24.70002993 | 12.03407133 | 12.22404314 | 5.75966112  | 20.10299365 | 16.34228026 | 20.58807382 |
| ENSMUSG00000028249 | -0.074251824 | 8.547112684  | 0.087048792 | 0.767963076 | 0.999071534 | Sdcbp         | Sdcbp         | SDCBP    | 380.3757818 | 399.6148993 | 404.3925636 | 414.4193224 | 389.2760466 | 351.9505753 | 400.4582361 | 365.5152556 | 322.2886232 | 304.3766977 |
| ENSMUSG00000085058 | -0.322986041 | -0.489929559 | 0.087034781 | 0.767981216 | 0.999071534 | 8030453O22Rik | 8030453O22Rik |          | 0.140360067 | 1.304380977 | 0.134640441 | 0.763203172 | 0.915635862 | 1.600767553 | 0.970729402 | 0.138164905 | 0           | 0           |
| ENSMUSG00000020519 | 0.079873563  | 5.352476278  | 0.087020312 | 0.767999949 | 0.999071534 | Sap30l        | Sap30l        | SAP30L   | 31.86173523 | 28.45922132 | 52.44245165 | 52.79978308 | 38.52210878 | 37.10870238 | 26.59798562 | 43.72919237 | 38.10579772 | 53.79042779 |
| ENSMUSG00000078584 | 0.076938008  | 4.346221713  | 0.087017613 | 0.768003444 | 0.999071534 | AU022252      | AU022252      | C1orf50  | 24.49283171 | 17.96488346 | 17.63789773 | 23.65929833 | 18.051107   | 20.51892955 | 22.32677625 | 16.51070612 | 22.15636074 | 17.18940766 |
| ENSMUSG00000026309 | 0.061496734  | 5.925856482  | 0.08697316  | 0.768061012 | 0.999071534 | Ilkap         | Ilkap         | ILKAP    | 69.12733304 | 50.8708581  | 62.8770858  | 65.01103384 | 59.90874642 | 61.04745352 | 56.94945826 | 56.71669342 | 48.31972289 | 75.62032193 |
| ENSMUSG00000098274 | 0.088319055  | 8.685242673  | 0.086972572 | 0.768061773 | 0.999071534 | RPL24         | RpL24         | RPL24    | 435.8180083 | 362.1435912 | 488.0042773 | 501.3551019 | 271.3552281 | 300.2894406 | 349.2037236 | 438.259078  | 456.4053175 | 444.1141638 |
| ENSMUSG00000023951 | -0.131793176 | 8.05575904   | 0.086836917 | 0.768237546 | 0.999071534 | Vegfa         | Vegfa         | VEGFA    | 218.8915246 | 420.8407352 | 299.9789018 | 196.5595079 | 313.8668931 | 77.78275067 | 101.4735802 | 570.0683972 | 173.9510024 | 260.9783453 |
| ENSMUSG00000036989 | 0.076930603  | 4.604843273  | 0.086804763 | 0.768279231 | 0.999071534 | Trim3         | Trim3         | TRIM3    | 23.51031124 | 28.93354167 | 28.00521166 | 15.26406344 | 27.20746562 | 26.8492376  | 17.08483748 | 30.87985622 | 19.2493205  | 25.88214994 |
| ENSMUSG00000001025 | 0.101453299  | 12.35079016  | 0.086791646 | 0.768296239 | 0.999071534 | S100a6        | S100a6        | S100A6   | 5492.780685 | 3041.401408 | 5742.010874 | 7580.688962 | 4063.134139 | 2928.022142 | 4819.736197 | 4533.397773 | 6485.685341 | 6282.107591 |
| ENSMUSG00000092300 | 0.265704113  | 0.130506579  | 0.086589182 | 0.768558931 | 0.999071534 | Cdk3-ps       | Cdk3-ps       | CDK3     | 1.403600671 | 0.830060622 | 1.548365068 | 0           | 0.784830739 | 0.218286485 | 0.711868228 | 1.381649048 | 0.15713731  | 2.548999616 |

|                      |              |             |             |             |             |              |              |          |             |             |             |             |             |             |             |             |             |             |
|----------------------|--------------|-------------|-------------|-------------|-------------|--------------|--------------|----------|-------------|-------------|-------------|-------------|-------------|-------------|-------------|-------------|-------------|-------------|
| ENSMUSG00000052056   | -0.081262018 | 4.517385946 | 0.08658453  | 0.768564971 | 0.999071534 | Zfp217       | Zfp217       | ZNF217   | 20.21184966 | 20.57364541 | 23.02351536 | 24.83879414 | 32.89748848 | 24.44808627 | 14.36679515 | 29.01463001 | 13.1209654  | 26.86253441 |
| ENSMUSG00000025016   | 0.095785683  | 7.760914306 | 0.086547678 | 0.768612823 | 0.999071534 | Tm9sf3       | Tm9sf3       | TM9SF3   | 248.1565986 | 296.6873822 | 159.2796413 | 179.4915096 | 208.3071587 | 298.8341974 | 405.6354595 | 129.2532684 | 110.7818037 | 170.4561794 |
| ENSMUSG000000042751  | 0.131733085  | 1.949924804 | 0.086509491 | 0.76866242  | 0.999071534 | Nmnat2       | Nmnat2       | NMNAT2   | 2.737021308 | 3.438822576 | 4.712415424 | 3.81601586  | 3.727946011 | 2.837724299 | 3.106334087 | 5.941090906 | 2.042785033 | 4.836563373 |
| ENSMUSG000000037343  | 0.092270731  | 5.09677017  | 0.086357117 | 0.768860441 | 0.999071534 | Taf2         | Taf2         | TAF2     | 43.65198086 | 42.51096184 | 32.51566643 | 24.63064782 | 28.7771271  | 62.72098323 | 56.69059709 | 20.1720761  | 18.30649664 | 19.80376624 |
| ENSMUSG00000003662   | -0.073238235 | 5.085862868 | 0.086328269 | 0.768897952 | 0.999071534 | Cla01        | Cla01        | ClAO1    | 47.09080251 | 43.34102246 | 23.69671756 | 28.86295632 | 37.99888829 | 38.56394561 | 39.79990549 | 36.95911203 | 17.6779474  | 28.88866231 |
| ENSMUSG000000039153  | -0.086956542 | 5.820878616 | 0.08631788  | 0.768911463 | 0.999071534 | Runx2        | Runx2        | RUNX2    | 46.73990234 | 52.70884948 | 94.04634782 | 53.49360415 | 54.08791844 | 47.73197796 | 24.07408917 | 69.3587822  | 51.6196064  | 66.60078483 |
| ENSMUSG000000054387  | 0.078879078  | 5.501830656 | 0.086107489 | 0.769185262 | 0.999071534 | Mdm4         | Mdm4         | MDM4     | 48.42422314 | 48.38067624 | 44.43134543 | 40.79667865 | 46.43581873 | 36.3083186  | 28.86302089 | 75.36895556 | 30.56320683 | 51.04535128 |
| ENSMUSG000000050471  | -0.090303346 | 3.698165754 | 0.086083403 | 0.769216629 | 0.999071534 | Fam118b      | Fam118b      | FAM118B  | 13.47456644 | 11.32439848 | 15.82025178 | 13.25198235 | 14.91178404 | 20.37340523 | 16.50239984 | 7.668152216 | 8.01400282  | 9.477049853 |
| ENSMUSG000000051346  | -0.098929341 | 3.730113297 | 0.086044678 | 0.769267073 | 0.999071534 | Spryd4       | Spryd4       | SPRYD4   | 16.70284798 | 10.25717768 | 13.93528561 | 18.0393477  | 11.24924059 | 15.20729176 | 20.19117157 | 6.148338263 | 8.092571475 | 12.67963911 |
| ENSMUSG000000028439  | -0.113222893 | 2.943391808 | 0.085998922 | 0.76932669  | 0.999071534 | Fam219a      | Fam219a      | FAM219A  | 8.632144126 | 11.38368853 | 9.559471289 | 4.371072713 | 7.063476652 | 13.67928637 | 6.083237587 | 7.184575049 | 3.299883514 | 6.470537486 |
| ENSMUSG000000040904  | -0.263466401 | 0.523558779 | 0.085906231 | 0.769447514 | 0.999071534 | Gm21988      | Gm21988      | RNASEK   | 0.98252047  | 1.956571465 | 0.875162864 | 2.567137942 | 0.850233301 | 1.309718907 | 1.747312924 | 0           | 0           | 2.875794438 |
| ENSMUSG000000033276  | -0.13267438  | 2.287436232 | 0.085900381 | 0.769455142 | 0.999071534 | Stk36        | Stk36        | STK36    | 3.438821644 | 6.284744707 | 3.029409915 | 5.203657991 | 7.848307392 | 2.837724299 | 2.588611739 | 5.941090906 | 3.614158135 | 6.470537486 |
| ENSMUSG000000024180  | -0.140248071 | 2.963011452 | 0.085707716 | 0.76970652  | 0.999071534 | Tmem8        | Tmem8        | TMEM8A   | 10.6673651  | 13.93316044 | 2.356207712 | 6.660682229 | 8.306125323 | 13.75204853 | 11.71346812 | 3.661369977 | 2.907040239 | 5.097999231 |
| ENSMUSG000000027007  | -0.059381403 | 5.579057448 | 0.085693726 | 0.769724786 | 0.999071534 | Ssfa2        | Ssfa2        | SSFA2    | 49.12602348 | 51.28588841 | 48.60519909 | 53.35483994 | 49.77134937 | 60.39259406 | 41.48250312 | 37.92626636 | 43.60560358 | 42.74476279 |
| ENSMUSG000000022204  | -0.068807533 | 5.97567619  | 0.085692459 | 0.76972644  | 0.999071534 | Ngdn         | Ngdn         | NGDN     | 77.33839696 | 54.48755081 | 77.21629273 | 61.61131062 | 63.30967962 | 68.39643183 | 88.14222972 | 43.66010991 | 36.9272679  | 63.26747764 |
| ENSMUSG000000037750  | 0.090927057  | 3.722822018 | 0.08568897  | 0.769730995 | 0.999071534 | Fam222b      | Fam222b      | FAM222B  | 11.15862533 | 10.5536279  | 16.15685288 | 13.94580342 | 13.73453794 | 19.20921064 | 7.118682283 | 16.44162367 | 10.52819978 | 12.61428015 |
| ENSMUSG000000037940  | -0.19910911  | 2.13330149  | 0.085686791 | 0.76973384  | 0.999071534 | Inpp4b       | Inpp4b       | INPP4B   | 7.579443623 | 8.300606217 | 2.356207712 | 1.179495811 | 4.447374189 | 9.240794513 | 8.865995207 | 1.036236786 | 0.707117896 | 0.849666539 |
| ENSMUSG000000020705  | -0.066384485 | 6.34175694  | 0.085560915 | 0.769898264 | 0.999071534 | Ddx42        | Ddx42        | DDX42    | 70.39057364 | 90.95092812 | 103.269218  | 85.68690159 | 78.87548928 | 86.36868573 | 55.33157592 | 90.22168283 | 60.1835898  | 90.45680687 |
| ENSMUSG000000039356  | -0.106590307 | 5.023693444 | 0.085492994 | 0.769987039 | 0.999071534 | Exosc2       | Exosc2       | EXOSC2   | 49.82782381 | 21.99660648 | 42.54637926 | 28.79357422 | 31.65483981 | 63.59412917 | 47.88931717 | 12.57300634 | 20.74212495 | 13.33322876 |
| ENSMUSG000000022426  | -0.058766673 | 6.067040255 | 0.085439905 | 0.770056455 | 0.999071534 | Josd1        | Josd1        | JOSD1    | 70.10985351 | 77.07705773 | 69.07054607 | 63.41524539 | 75.2783484  | 88.26050193 | 64.00342525 | 62.31237206 | 51.6196064  | 54.05186365 |
| ENSMUSG000000018974  | 0.068462815  | 5.259824295 | 0.085401462 | 0.770106735 | 0.999071534 | Sart3        | Sart3        | SART3    | 45.6170218  | 35.87047687 | 37.76664361 | 32.54020797 | 42.31545735 | 65.92251834 | 26.92156209 | 29.15279491 | 29.77752028 | 42.09117314 |
| ENSMUSG000000087231  | 0.188900765  | 0.493063906 | 0.08537698  | 0.770138761 | 0.999071534 | E230016M11Rk | E230016M11Rk |          | 0.631620302 | 0.711480533 | 1.683005509 | 1.457024238 | 1.700466601 | 0.654859454 | 1.100159989 | 2.279720929 | 1.571373102 | 0.71894861  |
| ENSMUSG000000031568  | 0.069260637  | 5.282220089 | 0.085351693 | 0.770171846 | 0.999071534 | Rwdd4a       | Rwdd4a       | RWDD4    | 47.16098254 | 33.9139054  | 36.62219987 | 42.94752395 | 35.57899351 | 51.51561036 | 55.65515239 | 27.49481605 | 24.19914577 | 36.99317391 |
| ENSMUSG000000089917  | -0.091376531 | 4.008919553 | 0.085282541 | 0.770262352 | 0.999071534 | Uckl1        | Uckl1        | UCKL1    | 21.61545033 | 24.24962816 | 10.43463415 | 10.96237283 | 18.9013403  | 18.55435119 | 17.60255983 | 18.99767441 | 8.01400282  | 12.81035704 |
| ENSMUSG000000017390  | -0.118952501 | 2.890841523 | 0.085241914 | 0.770315541 | 0.999071534 | Aldoc        | Aldoc        | ALDOC    | 6.947823321 | 11.50226861 | 4.173853661 | 6.383153803 | 10.52981242 | 5.893735083 | 6.147952881 | 11.12227484 | 3.378452169 | 7.25484506  |
| ENSMUSG000000029407  | -0.066887585 | 6.807594021 | 0.085203583 | 0.770365738 | 0.999071534 | Uso1         | Uso1         | USO1     | 133.903504  | 135.2405913 | 102.3267349 | 91.58438064 | 134.0098487 | 147.2706149 | 132.8604975 | 90.77434245 | 68.19759262 | 100.0645747 |
| ENSMUSG000000014498  | -0.132394421 | 4.77459591  | 0.085106279 | 0.770493219 | 0.999071534 | Ankrd52      | Ankrd52      | ANKRD52  | 47.09080251 | 44.64540344 | 17.09933597 | 10.75422652 | 30.21598346 | 73.19873449 | 28.7335903  | 16.37254122 | 7.542590889 | 11.76461361 |
| ENSMUSG000000074479  | -0.122205083 | 5.071546924 | 0.085012782 | 0.770615786 | 0.999071534 | Gm10704      | Gm10704      |          | 50.81034428 | 45.5347541  | 17.30129663 | 33.65032168 | 34.53255252 | 34.78031321 | 76.49347689 | 22.58996193 | 6.835472994 | 19.67304832 |
| ENSMUSG000000037892  | -0.095427144 | 4.179689442 | 0.085012053 | 0.770616743 | 0.999071534 | Pcdh18       | Pcdh18       | PCDH18   | 12.07096577 | 18.61707394 | 17.16665619 | 30.45874478 | 17.07006858 | 26.8492376  | 14.23736457 | 9.187966168 | 19.2493205  | 14.96720287 |
| ENSMUSG0000000047617 | 0.110426551  | 3.142356713 | 0.085011208 | 0.77061785  | 0.999071534 | BC029214     | BC029214     | C9orf142 | 6.73728322  | 7.055515284 | 7.741825339 | 11.44804758 | 10.20279961 | 6.330308052 | 5.500799946 | 9.395213526 | 11.31388633 | 9.477049853 |
| ENSMUSG000000025289  | 0.069694936  | 6.583767524 | 0.085000441 | 0.77063197  | 0.999071534 | Prdx4        | Prdx4        | PRDX4    | 99.02402733 | 76.54344733 | 99.90320699 | 123.083857  | 83.97688909 | 95.53671808 | 132.0191987 | 80.55013949 | 78.17581182 | 86.66598693 |
| ENSMUSG000000024168  | -0.16908378  | 1.857535423 | 0.084959606 | 0.770685529 | 0.999071534 | Tmem204      | Tmem204      | TMEM204  | 5.052962415 | 4.506043375 | 5.116336746 | 2.081463196 | 2.485297341 | 5.74821076  | 6.471529348 | 0.414494714 | 1.335667137 | 2.679717545 |
| ENSMUSG000000040429  | 0.108671185  | 2.765048045 | 0.084953207 | 0.770693924 | 0.999071534 | Mterf        | Mterf1a      | MTERF1   | 6.596923153 | 5.929004441 | 7.068623136 | 5.550568524 | 8.240722761 | 4.511254014 | 8.801279913 | 7.529987311 | 4.16413872  | 8.169870563 |
| ENSMUSG000000026343  | 0.222562267  | -0.19772327 | 0.084791862 | 0.770905687 | 0.999071534 | Gpr39        | Gpr39        | GPR39    | 0.701800335 | 0.474320355 | 1.346404407 | 0.346910533 | 0.654025616 | 1.528005392 | 1.229590576 | 0.27632981  | 0.15713731  | 0.849666539 |
| ENSMUSG000000028016  | 0.067330089  | 4.94175689  | 0.084739048 | 0.770975053 | 0.999071534 | Ints12       | Ints12       | INTS12   | 29.68615419 | 36.5819574  | 33.99671127 | 26.29581838 | 28.7771271  | 33.61611862 | 39.47632902 | 33.29774205 | 23.49202787 | 21.76453518 |
| ENSMUSG000000097431  | 0.14498808   | 1.246256829 | 0.084732233 | 0.770984006 | 0.999071534 | Gm26782      | Gm26782      |          | 2.947561409 | 2.075151554 | 2.760129034 | 1.179495811 | 2.158284533 | 1.819054038 | 2.135604685 | 1.934308667 | 2.828471584 | 2.352922722 |
| ENSMUSG000000024436  | 0.065907424  | 5.379072153 | 0.084727417 | 0.770990332 | 0.999071534 | Mrps18b      | Mrps18b      | MRPS18B  | 51.51214462 | 32.96526469 | 46.78755314 | 39.06212599 | 40.28797794 | 53.40742656 | 53.39011712 | 28.60013529 | 31.50603069 | 40.65327592 |
| ENSMUSG000000021460  | -0.075962999 | 4.668879356 | 0.0846883   | 0.771041727 | 0.999071534 | Auh          | Auh          | AUH      | 21.7558104  | 29.40786203 | 22.95619514 | 31.29133005 | 28.97333479 | 20.15511874 | 20.12645627 | 33.98856658 | 20.27071302 | 22.81027861 |
| ENSMUSG000000042303  | 0.081737053  | 4.018099158 | 0.084626231 | 0.771123305 | 0.999071534 | Sgsm3        | Sgsm3        | SGSM3    | 18.31698875 | 17.60914319 | 12.11763966 | 13.66827499 | 19.68617104 | 24.15703763 | 16.17882337 | 11.39860464 | 9.899650542 | 20.32663796 |

|                     |              |              |             |             |             |               |               |          |             |             |             |             |             |             |             |             |             |             |
|---------------------|--------------|--------------|-------------|-------------|-------------|---------------|---------------|----------|-------------|-------------|-------------|-------------|-------------|-------------|-------------|-------------|-------------|-------------|
| ENSMUSG00000003848  | -0.065631986 | 5.474835506  | 0.084562285 | 0.771207382 | 0.999071534 | Nob1          | Nob1          | NOB1     | 54.52988606 | 35.92976691 | 51.634609   | 40.72729654 | 53.17228258 | 66.9411886  | 42.06494076 | 30.87985622 | 28.99183373 | 46.01271101 |
| ENSMUSG00000002469  | 0.079003485  | 4.618828814  | 0.08448152  | 0.771313624 | 0.999071534 | Tpgs2         | Tpgs2         | TPGS2    | 18.45734882 | 18.91352417 | 25.11044219 | 29.48739528 | 31.0008142  | 36.59936725 | 30.67504911 | 14.57639746 | 18.30649664 | 23.72530412 |
| ENSMUSG000000069170 | 0.200645513  | 1.081768884  | 0.084422697 | 0.771391038 | 0.999071534 | Gpr98         | Adgrv1        | ADGRV1   | 1.122880537 | 0.237160178 | 2.827449254 | 3.607869541 | 1.700466601 | 1.018670261 | 0.906014109 | 1.243484143 | 3.69272679  | 2.810435474 |
| ENSMUSG000000029111 | -0.072463463 | 4.533203277  | 0.084396959 | 0.771424919 | 0.999071534 | Nelfa         | Nelfa         | NELFA    | 25.26481208 | 21.93731643 | 20.06142566 | 24.76941204 | 30.60839883 | 29.46867542 | 17.34369865 | 22.38271458 | 13.98522061 | 27.12397027 |
| ENSMUSG000000053470 | 0.095031794  | 6.344344164  | 0.084393693 | 0.771429218 | 0.999071534 | Kdm3a         | Kdm3a         | KDM3A    | 60.98644915 | 102.0974565 | 86.10256182 | 65.6354728  | 93.39485796 | 43.43901043 | 46.72444189 | 150.3924989 | 65.84053297 | 87.25421761 |
| ENSMUSG000000074873 | 0.115199296  | 3.651755204  | 0.084378763 | 0.771448874 | 0.999071534 | Al606181      | Al606181      |          | 8.140883891 | 6.640484974 | 17.63789773 | 16.44355925 | 12.62269439 | 12.22404314 | 5.047792891 | 12.84933615 | 10.44963113 | 21.50309932 |
| ENSMUSG000000020284 | -0.072857487 | 5.183351978  | 0.084367688 | 0.771463457 | 0.999071534 | 1810043G02Rik | 1810043G02Rik | C21orf2  | 39.58153892 | 24.48678834 | 42.27709837 | 44.05763766 | 41.7268343  | 29.75972406 | 28.53944442 | 42.34754332 | 25.77051887 | 42.81012175 |
| ENSMUSG000000003847 | 0.083848056  | 6.747624616  | 0.084306511 | 0.771544028 | 0.999071534 | Nfat5         | Nfat5         | NFAT5    | 81.82991911 | 115.4377165 | 111.818886  | 111.0807526 | 120.0137005 | 93.93595053 | 50.80150538 | 125.5918985 | 129.3240063 | 117.776854  |
| ENSMUSG000000031951 | -0.096131985 | 3.253640612  | 0.084284363 | 0.771573204 | 0.999071534 | Tmem231       | Tmem231       | TMEM231  | 8.070703857 | 10.25717768 | 8.078426441 | 8.04832436  | 16.21983528 | 9.822891806 | 9.707294022 | 8.013564478 | 7.85686551  | 8.431306421 |
| ENSMUSG000000037013 | 0.07639459   | 5.698832467  | 0.084273385 | 0.771587668 | 0.999071534 | Ss18          | Ss18          | SS18     | 66.7412119  | 53.42033001 | 42.00781749 | 46.97168613 | 53.43389282 | 83.16715062 | 80.18224862 | 30.53444396 | 31.74173666 | 39.80360938 |
| ENSMUSG000000037972 | -0.068759401 | 4.838734106  | 0.084159977 | 0.771737142 | 0.999071534 | Snn           | Snn           | SNN      | 30.17741442 | 35.87047687 | 22.41763337 | 33.65032168 | 29.03873735 | 43.00243746 | 27.11570797 | 20.93198308 | 19.56359512 | 26.99325234 |
| ENSMUSG000000039509 | 0.071932895  | 5.058024557  | 0.084084006 | 0.771837335 | 0.999071534 | Nup133        | Nup133        | NUP133   | 35.23037684 | 36.40408727 | 29.21697563 | 30.7362732  | 36.69083706 | 59.44668596 | 39.47632902 | 20.03391119 | 24.59198905 | 26.1435858  |
| ENSMUSG000000095079 | -0.254416334 | 0.19522649   | 0.084081673 | 0.771840413 | 0.999071534 | Igha          | Igha          | IGHA1    | 1.824680872 | 1.956571465 | 1.615685288 | 0           | 0.327012808 | 2.546675653 | 0.323576467 | 0.552659619 | 0.31427462  | 1.045743432 |
| ENSMUSG000000016494 | 0.065916958  | 6.948168427  | 0.084054409 | 0.771876382 | 0.999071534 | Cd34          | Cd34          | CD34     | 132.3595433 | 120.18092   | 111.818886  | 124.4714991 | 137.1491717 | 168.4444039 | 150.3336268 | 94.22846507 | 99.62505466 | 104.5743432 |
| ENSMUSG000000026154 | 0.08121979   | 4.495561185  | 0.084045703 | 0.771887869 | 0.999071534 | 1110058L19Rik | Sdhaf4        | SDHAF4   | 25.89643238 | 13.34025999 | 26.65880726 | 26.15705417 | 20.66720946 | 16.88082147 | 27.18042326 | 21.89913741 | 21.60638015 | 21.63381725 |
| ENSMUSG000000031839 | 0.079559122  | 7.55614131   | 0.08400798  | 0.77193765  | 0.999071534 | Hsbp1         | Hsbp1         | HSBP1    | 190.8896912 | 149.8259422 | 186.7462912 | 237.1480402 | 180.1186546 | 131.4084637 | 223.0736166 | 197.3685665 | 173.5581591 | 189.0181253 |
| ENSMUSG000000016382 | -0.078195271 | 8.919020078  | 0.083919269 | 0.772054763 | 0.999071534 | Pls3          | Pls3          | PLS3     | 401.2192518 | 525.8434038 | 56.9826848  | 459.9339843 | 670.7032692 | 573.2203085 | 321.8291545 | 558.8770399 | 368.6441297 | 461.6957253 |
| ENSMUSG000000034902 | -0.070111066 | 5.831924216  | 0.083903508 | 0.772075578 | 0.999071534 | Pip5k1c       | Pip5k1c       | PIP5K1C  | 79.7245181  | 66.58271987 | 44.22938476 | 42.53123131 | 71.22338958 | 93.49937756 | 47.630456   | 47.66689215 | 31.50603069 | 57.25445291 |
| ENSMUSG000000050608 | 0.084590783  | 7.515174731  | 0.083859308 | 0.77213396  | 0.999071534 | Minos1        | Minos1        | MINOS1   | 185.9069089 | 125.3984439 | 193.8149144 | 252.4121036 | 156.639135  | 137.8115339 | 222.3617484 | 144.2441606 | 193.5145975 | 189.737074  |
| ENSMUSG000000021650 | -0.076412306 | 4.747859106  | 0.083845166 | 0.772152644 | 0.999071534 | Ptcd2         | Ptcd2         | PTCD2    | 39.79207902 | 25.73187927 | 23.29279624 | 25.4632331  | 28.64632198 | 36.89041589 | 37.40543963 | 20.37932346 | 14.77090716 | 19.67304832 |
| ENSMUSG000000037217 | -0.15525028  | 1.173507638  | 0.0838381   | 0.772161979 | 0.999071534 | Syn1          | Syn1          | SYN1     | 1.543960738 | 3.853852886 | 2.221567271 | 1.942698983 | 2.027479409 | 3.565345915 | 1.359021163 | 2.556050739 | 1.649941757 | 0.784307574 |
| ENSMUSG000000042246 | 0.154446532  | 2.51564738   | 0.08383454  | 0.772166683 | 0.999071534 | Tmc7          | Tmc7          | TMC7     | 3.930081878 | 10.90936817 | 4.779735644 | 1.734552664 | 6.344048475 | 3.419821592 | 5.371369359 | 12.9184186  | 1.885647722 | 4.705845444 |
| ENSMUSG000000066315 | 0.253053353  | 8.677838143  | 0.083811202 | 0.772197522 | 0.999071534 | Gm12918       | Gm12918       |          | 346.8999058 | 618.158003  | 232.9279624 | 130.5771245 | 638.4598063 | 534.2197899 | 842.787267  | 561.640338  | 0           | 312.3504914 |
| ENSMUSG000000020635 | 0.14930693   | 0.85922186   | 0.083754369 | 0.772272639 | 0.999071534 | Fkbp1b        | Fkbp1b        | FKBP1B   | 1.333420637 | 2.490181865 | 1.548365068 | 1.387642131 | 1.504258917 | 2.473913492 | 1.617882337 | 1.934308667 | 1.099961171 | 1.568615148 |
| ENSMUSG000000025035 | 0.073199751  | 5.418308088  | 0.083702042 | 0.772341826 | 0.999071534 | Arl3          | Arl3          | ARL3     | 35.01983674 | 35.75189678 | 52.64441231 | 36.28684173 | 56.3770081  | 30.92391865 | 44.6535525  | 55.26596192 | 37.00583655 | 39.4114556  |
| ENSMUSG000000015575 | -0.072929406 | 7.140963216  | 0.083690603 | 0.772356952 | 0.999071534 | Atp6v0e       | Atp6v0e       | ATP6VOE1 | 157.4839953 | 136.248522  | 143.2574289 | 161.2440156 | 151.1453198 | 123.4046259 | 202.6882992 | 126.0063932 | 91.92532646 | 120.7833664 |
| ENSMUSG000000038070 | -0.067886229 | 4.571150491  | 0.083500114 | 0.772609032 | 0.999071534 | Cntln         | Cntln         | CNTLN    | 20.84346996 | 21.70015625 | 27.73593078 | 24.97755836 | 30.28138602 | 29.03210245 | 22.8444986  | 20.37932346 | 17.52081009 | 22.81027861 |
| ENSMUSG000000027722 | 0.089020947  | 4.511177871  | 0.083441715 | 0.772686375 | 0.999071534 | Spata5        | Spata5        | SPATA5   | 30.87921476 | 17.4905631  | 23.56207712 | 20.81463196 | 21.51744277 | 46.93159418 | 28.92773619 | 14.09282029 | 15.08518178 | 13.13715187 |
| ENSMUSG000000014243 | 0.125844595  | 2.463033557  | 0.083431419 | 0.772700014 | 0.999071534 | Zswim7        | Zswim7        | ZSWIM7   | 7.860163757 | 4.624623464 | 6.126140051 | 2.22022741  | 6.14784079  | 6.766881022 | 9.448432848 | 3.1779281   | 3.221314859 | 5.032640267 |
| ENSMUSG000000028906 | -0.120220841 | 2.649118093  | 0.083413364 | 0.772723934 | 0.999071534 | Epb4.1        | Epb41         | EPB41    | 8.91286426  | 8.419186306 | 6.664701814 | 4.02416218  | 5.363010051 | 10.91432423 | 5.436084652 | 6.908245239 | 1.885647722 | 4.705845444 |
| ENSMUSG000000020482 | -0.079624182 | 4.399755346  | 0.083405046 | 0.772734954 | 0.999071534 | Ccdc117       | Ccdc117       | CCDC117  | 27.08949295 | 27.86632087 | 16.83005509 | 17.13738032 | 23.54492217 | 30.05077271 | 26.14497857 | 20.1720761  | 10.05678785 | 15.16327977 |
| ENSMUSG000000061689 | 0.07223798   | 5.6663231    | 0.083401337 | 0.772739869 | 0.999071534 | Dlgap4        | Dlgap4        | DLGAP4   | 40.21315922 | 55.08045125 | 60.18427699 | 43.36381659 | 57.81586445 | 46.49502121 | 30.02789617 | 67.21722618 | 46.35550651 | 57.05837601 |
| ENSMUSG000000061455 | 0.066931265  | 4.455986135  | 0.083356757 | 0.772798945 | 0.999071534 | Stx17         | Stx17         | STX17    | 20.56274983 | 23.18240736 | 23.29279624 | 21.1615425  | 22.43307863 | 28.66829164 | 22.32677625 | 19.27400422 | 14.37806388 | 24.96712444 |
| ENSMUSG000000040715 | -0.291374506 | 1.671086743  | 0.083323975 | 0.772842398 | 0.999071534 | Rsc1a1        | Rsc1a1        | RSC1A1   | 2.105401006 | 11.68013875 | 1.750325729 | 0.277528426 | 1.700466601 | 5.529924276 | 6.600959935 | 2.072473572 | 0           | 0           |
| ENSMUSG000000032846 | 0.075907324  | 5.102116606  | 0.083268778 | 0.772915584 | 0.999071534 | Zswim6        | Zswim6        | ZSWIM6   | 28.14219345 | 35.27757642 | 43.28690168 | 31.98515112 | 34.07473459 | 33.68888078 | 21.22661626 | 47.7359746  | 35.59160076 | 28.23507267 |
| ENSMUSG000000028327 | -0.232499804 | -0.187851468 | 0.08326126  | 0.772925554 | 0.999071534 | 1300002K09Rik | Stra6l        |          | 0.701800335 | 1.956571465 | 0.942483085 | 0.277528426 | 0.261610246 | 1.45524323  | 0.647152935 | 0.207247357 | 0.235705965 | 0.915025503 |
| ENSMUSG000000004364 | 0.061286215  | 6.463797473  | 0.083193284 | 0.773015723 | 0.999071534 | Cu3           | Cu3           | CUL3     | 77.68929713 | 91.7216987  | 84.21759565 | 84.7849342  | 109.8763035 | 110.6712477 | 91.96043203 | 97.95891749 | 59.86931518 | 79.67257773 |
| ENSMUSG000000041638 | -0.073266971 | 5.900775769  | 0.083169196 | 0.773047685 | 0.999071534 | Gcn1l1        | Gcn1l1        | GCN1     | 78.6718176  | 72.45243427 | 65.56989461 | 48.7756209  | 52.91067233 | 113.4362098 | 43.6828231  | 36.33736996 | 43.60560358 | 54.44401743 |
| ENSMUSG000000029178 | -0.067510619 | 6.259477217  | 0.083154848 | 0.773066726 | 0.999071534 | Klf3          | Klf3          | KLF3     | 60.70572901 | 87.80855577 | 82.93851146 | 73.75317926 | 101.5701782 | 88.47878841 | 55.26686063 | 99.13331919 | 50.51964523 | 70.19552788 |

|                      |              |              |             |             |             |               |               |          |             |             |             |             |             |             |             |             |             |             |
|----------------------|--------------|--------------|-------------|-------------|-------------|---------------|---------------|----------|-------------|-------------|-------------|-------------|-------------|-------------|-------------|-------------|-------------|-------------|
| ENSMUSG00000049882   | -0.087728026 | 4.291136152  | 0.082985652 | 0.773291392 | 0.999071534 | Mettl21d      | Vcpkmt        | VCPKMT   | 27.01931291 | 22.8266671  | 23.56207712 | 14.01518552 | 17.07006858 | 25.83056734 | 30.09261147 | 14.85272726 | 11.86386692 | 10.45743432 |
| ENSMUSG000000025466  | -0.111571025 | 3.197315421  | 0.08295025  | 0.773338433 | 0.999071534 | Fuom          | Fuom          | FUOM     | 11.9306057  | 6.818355107 | 8.011106221 | 13.87642131 | 7.78290483  | 12.15128097 | 12.55476693 | 5.457513739 | 3.299883514 | 9.999921569 |
| ENSMUSG000000028914  | 0.095124604  | 3.434658181  | 0.082854974 | 0.773465084 | 0.999071534 | Casp9         | Casp9         | CASP9    | 10.59718506 | 13.28096995 | 5.99149961  | 12.41939707 | 11.24924059 | 15.28005392 | 9.901439902 | 11.605852   | 5.735511822 | 12.09140843 |
| ENSMUSG000000020471  | 0.080810975  | 5.124480521  | 0.082842208 | 0.773482059 | 0.999071534 | Pold2         | Pold2         | POLD2    | 44.91522147 | 28.69638149 | 36.55487965 | 28.5854279  | 37.21405755 | 65.0493724  | 44.52412191 | 16.51070612 | 25.53481291 | 27.38540613 |
| ENSMUSG000000057440  | 0.084382367  | 3.607254774  | 0.082777512 | 0.773568112 | 0.999071534 | Mpp7          | Mpp7          | MPP7     | 15.72032751 | 10.49433786 | 10.70391503 | 10.96237283 | 13.01510976 | 15.28005392 | 15.01394809 | 10.0169556  | 10.68533709 | 9.215613995 |
| ENSMUSG00000000776   | -0.081617779 | 4.555806743  | 0.082720237 | 0.773644324 | 0.999071534 | Polr3d        | Polr3d        | POLR3D   | 29.33525402 | 22.94524719 | 25.11044219 | 20.25957511 | 27.66528356 | 41.18338342 | 21.93848449 | 14.23098519 | 10.37106247 | 27.32004716 |
| ENSMUSG000000026123  | -0.068296218 | 5.928765671  | 0.082671425 | 0.773709298 | 0.999071534 | Plekhh2       | Plekhh2       | PLEKHB2  | 78.32091743 | 87.80855577 | 43.690823   | 51.96719781 | 62.65565401 | 92.55346946 | 63.16212644 | 45.93983084 | 36.06301269 | 57.64660669 |
| ENSMUSG000000084159  | -0.12839045  | 3.629829725  | 0.08266997  | 0.773711235 | 0.999071534 | Gm12696       | Gm12696       |          | 20.42238976 | 21.64086621 | 7.203263577 | 6.175007483 | 11.64165596 | 19.35473496 | 21.61490802 | 8.566224097 | 3.535589479 | 6.274460592 |
| ENSMUSG000000057604  | -0.211611806 | 0.074517234  | 0.082643768 | 0.773746122 | 0.999071534 | Lmcd1         | Lmcd1         | LMCD1    | 1.052700503 | 1.067220799 | 1.750325729 | 0.763203172 | 0.457817931 | 1.45524323  | 1.229590576 | 1.174401691 | 0.15713731  | 0.261435858 |
| ENSMUSG000000081642  | -0.096968953 | 7.547935072  | 0.082607102 | 0.77379495  | 0.999071534 | Gm13532       | Gm13532       |          | 313.3538498 | 137.7307732 | 175.5038144 | 254.9098595 | 117.0705853 | 140.2854474 | 179.0672171 | 102.7946892 | 199.0144034 | 230.5210678 |
| ENSMUSG000000060224  | 0.127179786  | 2.81176987   | 0.082599362 | 0.773805259 | 0.999071534 | Pyroxd2       | Pyroxd2       | PYROXD2  | 6.947823321 | 5.573264174 | 3.635291898 | 9.089055958 | 8.829345815 | 4.875064822 | 4.400639957 | 9.464295978 | 3.221314859 | 12.74499808 |
| ENSMUSG000000027243  | 0.117305093  | 2.369210963  | 0.082544593 | 0.773878222 | 0.999071534 | Harbi1        | Harbi1        | HARBI1   | 3.649361744 | 6.581194929 | 5.250977187 | 2.983430582 | 6.736463844 | 4.729540499 | 5.436084652 | 6.908245239 | 2.828471584 | 5.490153018 |
| ENSMUSG000000050855  | -0.16955513  | 0.755660469  | 0.082471463 | 0.773975685 | 0.999071534 | Zfp940        | Zfp940        |          | 2.737021308 | 1.363671021 | 0.605881983 | 1.179495811 | 2.746907587 | 1.236956746 | 1.553167044 | 1.588896405 | 1.571373102 | 0.980384468 |
| ENSMUSG000000049536  | 0.143957441  | 1.845752608  | 0.082449465 | 0.774005012 | 0.999071534 | Tceal1        | Tceal1        | TCEAL1   | 3.649361744 | 4.091013064 | 2.490848153 | 2.428373729 | 4.51277675  | 1.600767553 | 2.329750565 | 7.046410144 | 2.592765618 | 3.529384083 |
| ENSMUSG000000040714  | -0.172637713 | 1.309088149  | 0.082447091 | 0.774008176 | 0.999071534 | Klc3          | Klc3          | KLC3     | 1.824680872 | 1.007930755 | 3.971893    | 3.191576901 | 2.812310149 | 2.910486461 | 0.582437641 | 3.661369977 | 0.628549241 | 3.137230296 |
| ENSMUSG000000056836  | -0.190060255 | 4.074372406  | 0.082421694 | 0.774042041 | 0.999071534 | Gm6851        | Gm6851        |          | 16.14140771 | 15.00038123 | 26.59148704 | 8.672763319 | 26.74964769 | 14.40690798 | 26.72741621 | 24.6624355  | 0           | 12.02604947 |
| ENSMUSG000000025757  | 0.076141983  | 7.239064674  | 0.082219117 | 0.774312357 | 0.999071534 | Hspa4l        | Hspa4l        | HSPA4L   | 112.0073335 | 180.5974753 | 119.2241102 | 155.9709755 | 195.1612438 | 136.8656258 | 136.8081304 | 177.6109851 | 153.0517401 | 130.0643394 |
| ENSMUSG000000047656  | 0.130845195  | 1.807658356  | 0.082152899 | 0.774400795 | 0.999071534 | Trpt1         | Trpt1         | TRPT1    | 3.859901845 | 2.312311732 | 3.298690797 | 4.093544286 | 3.073920395 | 2.692199976 | 2.394465859 | 3.523205072 | 2.671334273 | 5.555511983 |
| ENSMUSG000000094568  | -0.520091915 | -0.401557305 | 0.082146973 | 0.774408711 | 0.999071534 | Gm1815        | Smарсe1-ps1   |          | 0           | 3.023792265 | 0.673202203 | 0           | 0           | 2.910486461 | 0           | 0           | 0           | 0           |
| ENSMUSG000000021213  | -0.207630588 | 1.725484507  | 0.082094266 | 0.774479134 | 0.999071534 | Akr1c13       | Akr1c13       | AKR1C3   | 6.035482885 | 4.03172302  | 2.086926831 | 3.260959008 | 2.223687094 | 3.710870238 | 8.412988152 | 1.036236786 | 0           | 1.764692042 |
| ENSMUSG000000039742  | -0.244183727 | -0.226849192 | 0.082044781 | 0.774545277 | 0.999071534 | Fam71f1       | Fam71f1       | FAM71F1  | 0.771980369 | 0.118580089 | 0.673202203 | 0.901967385 | 1.569661478 | 1.091432423 | 0.906014109 | 0.483577167 | 0           | 0.849666539 |
| ENSMUSG000000042694  | -0.071321479 | 4.311549775  | 0.081964129 | 0.774653121 | 0.999071534 | Obfc1         | Obfc1         | OBFC1    | 24.28229161 | 19.38784452 | 21.94639183 | 15.12529923 | 24.72216828 | 23.28389169 | 19.34987275 | 16.71795348 | 11.94243557 | 23.00635551 |
| ENSMUSG000000050555  | 0.096454601  | 3.37721594   | 0.081946268 | 0.774677012 | 0.999071534 | Hyls1         | Hyls1         | HYLS1    | 10.73754513 | 5.810424352 | 12.72352164 | 10.26855177 | 11.90326621 | 9.677367482 | 7.959981098 | 13.33291331 | 9.349669957 | 10.26135743 |
| ENSMUSG000000074227  | -0.166386395 | 1.994583497  | 0.08192846  | 0.774700835 | 0.999071534 | Spint2        | Spint2        | SPINT2   | 6.175842952 | 6.166164618 | 4.241173882 | 3.122194795 | 1.438856355 | 9.604605321 | 3.818202315 | 1.72706131  | 0.471411931 | 3.529384083 |
| ENSMUSG000000085774  | -0.285134306 | -0.634518735 | 0.081927643 | 0.774701927 | 0.999071534 | Gm13055       | Gm13055       |          | 0.070180034 | 0.118580089 | 1.144443746 | 1.387642131 | 0.130805123 | 0.145524323 | 0.258861174 | 0.414494714 | 0.31427462  | 1.045743432 |
| ENSMUSG0000000019872 | 0.132070356  | 3.299528473  | 0.081909142 | 0.774726681 | 0.999071534 | Smpdl3a       | Smpdl3a       | SMPDL3A  | 14.59744698 | 13.51813012 | 4.779735644 | 8.672763319 | 6.671061283 | 12.2240314  | 22.39149154 | 5.872008453 | 2.749902928 | 7.581639883 |
| ENSMUSG000000082908  | -0.091129863 | 4.102232557  | 0.081907999 | 0.77472821  | 0.999071534 | Gm13736       | Gm13736       |          | 19.15914916 | 15.59328168 | 20.1960661  | 16.02726661 | 20.47100178 | 19.79130793 | 22.7797833  | 10.36236786 | 5.892649132 | 23.26779136 |
| ENSMUSG000000020265  | -0.067748326 | 7.297805699  | 0.081837413 | 0.774822677 | 0.999071534 | Sumo3         | Sumo3         | SUMO3    | 181.8364669 | 143.3040373 | 160.1548042 | 175.7448759 | 173.5129959 | 195.948501  | 182.1088359 | 128.5624439 | 102.9249382 | 143.9204398 |
| ENSMUSG000000060147  | -0.100372037 | 8.979241486  | 0.081766655 | 0.774917418 | 0.999071534 | Serpinb6a     | Serpinb6a     | SERPINB6 | 794.2976196 | 694.22713   | 328.3880348 | 441.3395798 | 464.8814078 | 479.5754066 | 928.8586073 | 409.8661901 | 194.3002841 | 387.7747364 |
| ENSMUSG000000026384  | 0.088293571  | 3.410541276  | 0.081672602 | 0.775043419 | 0.999071534 | Ptpn4         | Ptpn4         | PTPN4    | 9.544484562 | 9.367827016 | 12.65620142 | 9.782877023 | 11.51085084 | 15.1345296  | 13.33135046 | 9.187966168 | 6.756904338 | 9.019537102 |
| ENSMUSG000000003581  | -0.077488841 | 4.113096716  | 0.081670628 | 0.775046065 | 0.999071534 | Rnf215        | Rnf215        | RNF215   | 24.42265167 | 14.11103057 | 15.01240914 | 21.2309246  | 16.61225065 | 23.0656052  | 17.34369865 | 13.33291331 | 11.15674902 | 17.38548456 |
| ENSMUSG000000047143  | -0.077662285 | 4.179895251  | 0.081663965 | 0.775054994 | 0.999071534 | Dmrta2        | Dmrta2        | DMRTA2   | 17.75554849 | 15.8897319  | 20.93658853 | 20.1208109  | 21.05962483 | 21.46483765 | 11.38989165 | 23.48803381 | 13.27810271 | 15.35935666 |
| ENSMUSG000000040857  | -0.077009239 | 4.674669708  | 0.081658284 | 0.775062608 | 0.999071534 | Erf           | Erf           | ERF      | 28.00183338 | 35.63331669 | 25.78364439 | 19.98204669 | 26.55344001 | 45.54911311 | 21.93848449 | 24.3861057  | 16.89226085 | 14.90184391 |
| ENSMUSG0000000002845 | 0.074559171  | 4.248752913  | 0.081638552 | 0.775089055 | 0.999071534 | Tmem39a       | Tmem39a       | TMEM39A  | 21.7558104  | 20.63293545 | 18.58038081 | 15.19468133 | 19.62076848 | 21.90141062 | 21.55019273 | 23.83344608 | 13.74951464 | 13.00643394 |
| ENSMUSG000000040152  | -0.102874683 | 5.432743754  | 0.08161726  | 0.775117597 | 0.999071534 | Thbs1         | Thbs1         | THBS1    | 46.66972231 | 95.57555158 | 33.05422819 | 20.81463196 | 37.47566779 | 47.36816715 | 55.26686063 | 59.41090906 | 17.28510412 | 25.2285603  |
| ENSMUSG000000056216  | -0.058420033 | 6.016585869  | 0.081441205 | 0.775353752 | 0.999071534 | Cebpg         | Cebpg         | CEBPG    | 60.70572901 | 79.56723959 | 62.67512514 | 69.72901708 | 69.19591017 | 78.94694525 | 62.5149735  | 60.03265113 | 52.16958699 | 53.85578675 |
| ENSMUSG000000024925  | -0.062567724 | 5.127084406  | 0.081399258 | 0.77541006  | 0.999071534 | Rnaseh2c      | Rnaseh2c      | RNASEH2C | 35.01983674 | 31.18656336 | 40.99801419 | 38.22954071 | 38.91452415 | 31.65154026 | 39.41161373 | 30.11994924 | 29.69895163 | 32.28732847 |
| ENSMUSG000000086725  | -0.178588451 | 0.496014513  | 0.08138897  | 0.775423872 | 0.999071534 | A630052C17Rik | A630052C17Rik |          | 1.263240604 | 0.948640711 | 2.221567271 | 0.555056852 | 2.092881971 | 1.528005392 | 1.29430587  | 1.796143762 | 0.707117896 | 0.522871716 |
| ENSMUSG000000029535  | -0.143114218 | 3.793229033  | 0.08136127  | 0.775461067 | 0.999071534 | Triap1        | Triap1        | TRIAP1   | 29.47561409 | 18.08346354 | 7.539864678 | 10.5460802  | 9.679579116 | 21.90141062 | 28.7335903  | 4.559441858 | 2.749902928 | 8.823460208 |

|                     |              |              |             |             |             |               |               |         |  |  |             |             |             |             |             |             |             |             |             |             |
|---------------------|--------------|--------------|-------------|-------------|-------------|---------------|---------------|---------|--|--|-------------|-------------|-------------|-------------|-------------|-------------|-------------|-------------|-------------|-------------|
| ENSMUSG00000074039  | 0.157098238  | 1.357642881  | 0.081347346 | 0.775479765 | 0.999071534 | 4930520004Rik | 4930520004Rik |         |  |  | 3.228281543 | 0.474320355 | 2.625488593 | 3.399723221 | 2.158284533 | 2.182864846 | 2.329750565 | 2.003391119 | 2.985608894 | 2.61435858  |
| ENSMUSG00000034656  | 0.163393574  | 2.441387553  | 0.081289312 | 0.775557719 | 0.999071534 | Cacna1a       | Cacna1a       | CACNA1A |  |  | 2.807201342 | 2.312311732 | 10.16535327 | 7.285121188 | 3.073920395 | 3.419821592 | 1.100159989 | 5.664761096 | 5.106962581 | 11.11102397 |
| ENSMUSG00000051984  | 0.218499428  | 0.390508192  | 0.08122983  | 0.77563765  | 0.999071534 | Sec31b        | Sec31b        | SEC31B  |  |  | 0.561440268 | 0.830060622 | 0.336601102 | 1.179495811 | 2.746907587 | 1.091432423 | 0.258861174 | 2.279720929 | 0.31427462  | 2.22204793  |
| ENSMUSG00000040502  | 0.132955019  | 3.043592956  | 0.08122285  | 0.775647031 | 0.999071534 | 9-Mar         | 9-Mar         | 9-Mar   |  |  | 4.912602348 | 10.96865822 | 8.347707322 | 6.521918016 | 9.483371431 | 5.529924276 | 4.46535525  | 19.13583931 | 2.907040239 | 8.823460208 |
| ENSMUSG00000022092  | 0.07877691   | 3.956482983  | 0.081148779 | 0.775746615 | 0.999071534 | Ppp3cc        | Ppp3cc        | PPP3CC  |  |  | 16.14140771 | 20.87009563 | 11.10783636 | 13.52951078 | 16.28523784 | 17.0263458  | 17.99085159 | 13.81649048 | 10.29249382 | 17.90835627 |
| ENSMUSG00000024906  | 0.077450903  | 4.055262326  | 0.08113371  | 0.775766881 | 0.999071534 | Mus81         | Mus81         | MUS81   |  |  | 17.82572852 | 15.94902195 | 17.36861685 | 14.63962448 | 17.65869163 | 12.36956746 | 15.98467749 | 19.27400422 | 13.43524002 | 19.60768935 |
| ENSMUSG00000029001  | 0.11790354   | 2.085791612  | 0.081007289 | 0.775936977 | 0.999071534 | Fbxo44        | Fbxo44        | FBXO44  |  |  | 4.912602348 | 4.150303108 | 3.298690797 | 4.371072713 | 3.727946011 | 3.274297269 | 3.17104938  | 5.526596192 | 3.614158135 | 4.771204409 |
| ENSMUSG00000026864  | -0.075817613 | 10.01200007  | 0.080680997 | 0.776376658 | 0.999071534 | Hspa5         | Hspa5         | HSPA5   |  |  | 1108.28309  | 1484.385552 | 944.368051  | 862.6277307 | 1121.392321 | 1195.627838 | 1295.859037 | 937.5870439 | 636.5632436 | 859.2743063 |
| ENSMUSG00000035949  | 0.064085131  | 5.306325428  | 0.080676956 | 0.776382109 | 0.999071534 | Fbxw2         | Fbxw2         | FBXW2   |  |  | 51.16124445 | 42.27380166 | 34.7372337  | 29.55677739 | 43.55810602 | 45.98568608 | 49.37776892 | 35.64654544 | 23.41345922 | 43.20227554 |
| ENSMUSG00000033182  | -0.19134778  | 0.676819974  | 0.080660948 | 0.776403705 | 0.999071534 | Kbtbd12       | Kbtbd12       | KBTBD12 |  |  | 1.122880537 | 1.304380977 | 3.635291898 | 0.693821065 | 1.373453794 | 2.619437815 | 0.906014109 | 0.207247357 | 1.571373102 | 1.437897219 |
| ENSMUSG00000044827  | 0.118341775  | 2.829735736  | 0.080643369 | 0.776427423 | 0.999071534 | Tlr1          | Tlr1          | TLR1    |  |  | 10.94808523 | 5.810424352 | 7.472544458 | 4.440454819 | 6.278645913 | 13.97033501 | 10.22501637 | 3.730452429 | 4.32127603  | 4.444409586 |
| ENSMUSG00000024078  | 0.077749966  | 4.418948296  | 0.080608814 | 0.776474055 | 0.999071534 | Ttc27         | Ttc27         | TTC27   |  |  | 22.3874307  | 19.92145492 | 23.89867822 | 19.49637194 | 21.77905301 | 32.74297269 | 30.80447797 | 12.64208879 | 16.49941757 | 15.0979208  |
| ENSMUSG00000020175  | -0.227992977 | 0.495256394  | 0.080580541 | 0.776512216 | 0.999071534 | Rab36         | Rab36         | RAB36   |  |  | 0.912340436 | 2.371601776 | 0           | 0.763203172 | 3.139322957 | 0.654859454 | 1.229590576 | 1.243484143 | 0.471411931 | 2.0261279   |
| ENSMUSG00000026095  | -0.068370164 | 6.141282749  | 0.080532983 | 0.776576424 | 0.999071534 | Asnsd1        | Asnsd1        | ASNSD1  |  |  | 98.04150686 | 75.77267675 | 63.75224866 | 62.79080643 | 75.40915352 | 76.18198311 | 102.8326013 | 57.68384775 | 36.69156193 | 64.50929797 |
| ENSMUSG00000091269  | 0.427036934  | 4.057906297  | 0.080493084 | 0.776630308 | 0.999071534 | Gm6682        | Gm6682        |         |  |  | 37.19541778 | 36.81911758 | 0           | 0           | 0.523220493 | 39.87366451 | 59.53807    | 0.414494714 | 0           | 0.065358965 |
| ENSMUSG00000006289  | -0.076227974 | 4.798933179  | 0.080480732 | 0.776646991 | 0.999071534 | Osgep         | Osgep         | OSGEP   |  |  | 35.30055687 | 33.85461536 | 23.76403778 | 25.4632331  | 29.69276296 | 28.88657812 | 43.81225369 | 25.42234248 | 14.77090716 | 19.21553556 |
| ENSMUSG00000036712  | 0.057531115  | 5.962943989  | 0.080413622 | 0.776737663 | 0.999071534 | Cyld          | Cyld          | CYLD    |  |  | 59.16176828 | 64.56685836 | 57.82806927 | 65.28856226 | 69.6537281  | 81.63914523 | 51.38394302 | 59.41090906 | 49.65539002 | 67.3850924  |
| ENSMUSG00000001756  | -0.067912829 | 5.076110892  | 0.080400354 | 0.776755595 | 0.999071534 | Slc12a7       | Slc12a7       | SLC12A7 |  |  | 39.72189898 | 33.380295   | 38.84376714 | 27.89160683 | 39.37234208 | 59.01011299 | 33.39309144 | 25.42234248 | 19.09218319 | 27.97363681 |
| ENSMUSG00000030243  | -0.090659388 | 3.474691688  | 0.08039303  | 0.776765494 | 0.999071534 | Recql         | Recql         | RECQL   |  |  | 16.14140771 | 8.182026128 | 13.59868451 | 9.921641237 | 11.11843547 | 16.58977283 | 10.35444696 | 7.391822406 | 7.85686551  | 10.39207536 |
| ENSMUSG00000000823  | -0.093879809 | 3.53938632   | 0.080368607 | 0.776798506 | 0.999071534 | Znf512b       | Zfp512b       | ZNF512B |  |  | 14.17636678 | 13.57742017 | 12.31960032 | 9.713494917 | 12.03407133 | 18.69987551 | 8.218842272 | 10.84594503 | 4.478413341 | 13.72538255 |
| ENSMUSG00000050029  | 0.061704835  | 6.789734758  | 0.080359918 | 0.776810253 | 0.999071534 | Rap2c         | Rap2c         | RAP2C   |  |  | 107.3052713 | 113.8961753 | 104.8849033 | 104.7669809 | 131.2629411 | 117.4381287 | 129.430587  | 111.4299957 | 92.63244436 | 93.13652442 |
| ENSMUSG00000031935  | 0.067642232  | 4.375496714  | 0.080359589 | 0.776810698 | 0.999071534 | Med17         | Med17         | MED17   |  |  | 21.68563036 | 24.13104807 | 20.86926831 | 19.14946141 | 18.77053518 | 27.21304841 | 21.61490802 | 22.17546722 | 16.18514295 | 15.75151045 |
| ENSMUSG000000062421 | -0.071929298 | 4.969925055  | 0.080342352 | 0.776834001 | 0.999071534 | Arf2          | Arf2          |         |  |  | 39.02009865 | 30.35650274 | 32.51566643 | 32.8177364  | 31.39322957 | 45.54911311 | 43.87696898 | 22.79720929 | 15.47802505 | 24.18281687 |
| ENSMUSG000000015522 | -0.06537853  | 5.960295174  | 0.080337233 | 0.776840922 | 0.999071534 | Arnt          | Arnt          | ARNT    |  |  | 67.72373237 | 76.54344733 | 57.96270971 | 57.10147369 | 71.28879214 | 62.2116481  | 41.93551017 | 83.79701475 | 47.7697423  | 56.27406844 |
| ENSMUSG00000028885  | 0.14157879   | 1.34959062   | 0.080240678 | 0.776971516 | 0.999071534 | Smpdl3b       | Smpdl3b       | SMPDL3B |  |  | 2.947561409 | 2.371601776 | 1.615685288 | 2.497755836 | 2.485297341 | 5.74821076  | 2.135604685 | 1.657978857 | 1.257098482 | 2.156845829 |
| ENSMUSG000000024792 | 0.070090664  | 5.163799302  | 0.08022773  | 0.776989035 | 0.999071534 | Zfp1          | Zfp1          | ZFPL1   |  |  | 32.28281543 | 31.12727331 | 36.55487965 | 41.42111761 | 38.91452415 | 29.97801055 | 25.43311034 | 36.1301226  | 38.26293503 | 42.87548072 |
| ENSMUSG000000078515 | -0.065977801 | 5.441619076  | 0.080166882 | 0.777071385 | 0.999071534 | Ddi2          | Ddi2          | RSC1A1  |  |  | 42.66946039 | 56.68128245 | 45.77774983 | 38.36830492 | 47.08984435 | 60.17430758 | 28.92773619 | 45.31808877 | 24.35628308 | 50.58783853 |
| ENSMUSG000000003135 | 0.070636586  | 5.250179244  | 0.080095885 | 0.777167513 | 0.999071534 | Cnot11        | Cnot11        | CNOT11  |  |  | 34.66893657 | 22.64879696 | 46.04703071 | 44.89022294 | 43.03488553 | 40.01918884 | 31.38691734 | 35.50838053 | 40.14858276 | 38.10427631 |
| ENSMUSG000000060681 | -0.069205217 | 5.068730321  | 0.080049782 | 0.77722996  | 0.999071534 | Slc9a6        | Slc9a6        | SLC9A6  |  |  | 33.0547958  | 45.17901384 | 25.85096461 | 36.49498804 | 37.08325242 | 39.65537803 | 44.58883721 | 25.21509512 | 26.71334273 | 22.48348379 |
| ENSMUSG000000019831 | 0.074520641  | 4.530113214  | 0.080028555 | 0.777258718 | 0.999071534 | Wasf1         | Wasf1         | WASF1   |  |  | 24.63319177 | 18.49849386 | 23.09083558 | 20.39833933 | 29.82356809 | 29.10486461 | 16.8259763  | 16.51070612 | 25.45624425 | 25.2285603  |
| ENSMUSG000000026192 | -0.08718334  | 6.579775655  | 0.080015111 | 0.777276934 | 0.999071534 | Atic          | Atic          | ATIC    |  |  | 143.1672684 | 91.48453852 | 88.39144931 | 80.20571517 | 110.1379137 | 191.2917226 | 121.6000364 | 48.49588158 | 42.11279913 | 70.97983545 |
| ENSMUSG000000024826 | -0.068093766 | 5.417540562  | 0.079800605 | 0.777567807 | 0.999071534 | Dpf2          | Dpf2          | DPF2    |  |  | 48.70494328 | 55.79193179 | 39.0457278  | 30.31998056 | 54.02251588 | 66.9411886  | 36.95243258 | 40.13690484 | 21.76351746 | 42.15653211 |
| ENSMUSG000000074580 | 0.13706178   | 1.545324739  | 0.079747564 | 0.777639797 | 0.999071534 | 4931440P22Rik | 4931440P22Rik |         |  |  | 1.754500839 | 1.778701332 | 4.577774983 | 2.567137942 | 3.073920395 | 2.619437815 | 2.523896446 | 4.144947144 | 2.278490998 | 2.418281687 |
| ENSMUSG000000038214 | -0.083572414 | 3.993274587  | 0.079715485 | 0.777683347 | 0.999071534 | Bend3         | Bend3         | BEND3   |  |  | 18.80824899 | 13.63671021 | 22.01371205 | 15.26406344 | 14.6501738  | 29.10486461 | 13.39606575 | 11.4676871  | 9.742513232 | 13.39858772 |
| ENSMUSG000000010601 | -0.111043731 | 2.841257628  | 0.079637706 | 0.777788981 | 0.999071534 | Apol7a        | Apol7a        |         |  |  | 5.684582717 | 5.691844263 | 8.549667983 | 11.03175494 | 6.605658721 | 6.766881022 | 6.342098761 | 3.592287524 | 6.128355098 | 9.673126747 |
| ENSMUSG000000021067 | 0.06153174   | 6.217857537  | 0.079607427 | 0.777830119 | 0.999071534 | Sav1          | Sav1          | SAV1    |  |  | 70.32039361 | 66.40484974 | 85.09275851 | 81.80150362 | 72.79305106 | 72.10730207 | 72.15755223 | 83.24435513 | 70.63322093 | 63.85570832 |
| ENSMUSG000000049751 | 0.075436922  | 7.275928877  | 0.079604102 | 0.777834638 | 0.999071534 | Rpl36a1       | Rpl36a1       |         |  |  | 194.3986929 | 124.4498032 | 152.4129789 | 167.4884052 | 143.0354022 | 172.0097498 | 228.1861248 | 99.5478139  | 134.8238121 | 133.8551593 |
| ENSMUSG000000093594 | 0.266670585  | -0.023586524 | 0.079533619 | 0.777930433 | 0.999071534 | Gm20707       | Gm20707       |         |  |  | 0.491260235 | 0.948640711 | 0.875162864 | 0.485674746 | 1.177246109 | 1.600767553 | 2.006174098 | 1.105319238 | 0           | 0           |
| ENSMUSG000000067873 | -0.058972681 | 6.001994019  | 0.079521549 | 0.777946843 | 0.999071534 | Htatsf1       | Htatsf1       | HTATSF1 |  |  | 57.40726744 | 72.15598404 | 75.19668612 | 65.35794437 | 68.41107943 | 72.90768585 | 50.54264421 | 54.09156022 | 52.87670488 | 72.74452749 |

|                     |              |              |             |             |             |               |           |              |             |             |              |             |             |             |             |             |             |             |
|---------------------|--------------|--------------|-------------|-------------|-------------|---------------|-----------|--------------|-------------|-------------|--------------|-------------|-------------|-------------|-------------|-------------|-------------|-------------|
| ENSMUSG00000028960  | -0.066199542 | 5.88847329   | 0.079423268 | 0.778080507 | 0.999071534 | Ube4b         | Ube4b     | UBE4B        | 58.31960787 | 60.00152494 | 65.56989461  | 57.65653054 | 72.66224593 | 82.29400468 | 31.12805616 | 59.2036617  | 40.93426931 | 70.19552788 |
| ENSMUSG00000027698  | 0.072716089  | 5.661337796  | 0.079421544 | 0.778082852 | 0.999071534 | Nceh1         | Nceh1     | NCEH1        | 51.65250469 | 58.99359419 | 39.24768846  | 50.09388093 | 55.72298248 | 65.63146969 | 85.55361798 | 40.75864691 | 28.99183373 | 34.64025119 |
| ENSMUSG00000018995  | 0.097363933  | 3.429323119  | 0.079403798 | 0.778106997 | 0.999071534 | Nars2         | Nars2     | NARS2        | 11.36916543 | 9.901437416 | 11.915679    | 9.991023343 | 10.20279961 | 12.95166475 | 18.37914335 | 7.184575049 | 8.956826681 | 6.013024734 |
| ENSMUSG00000022635  | 0.083055208  | 7.149429504  | 0.079330372 | 0.778206929 | 0.999071534 | Zcrb1         | Zcrb1     | ZCRB1        | 127.4469409 | 99.42940447 | 194.5554368  | 175.7448759 | 113.081029  | 103.0312207 | 124.9005164 | 128.2861141 | 167.5083727 | 158.5608479 |
| ENSMUSG00000027406  | -0.064795181 | 6.890806682  | 0.079322693 | 0.778217382 | 0.999071534 | ldh3b         | ldh3b     | IDH3B        | 150.5361719 | 124.0940629 | 108.1162739  | 111.2888989 | 136.8875614 | 128.4979772 | 145.4799797 | 110.7391712 | 68.04045531 | 114.3128289 |
| ENSMUSG00000047090  | -0.082447189 | 4.539072158  | 0.079300563 | 0.778247513 | 0.999071534 | Tmem198b      | Tmem198b  |              | 42.38874026 | 26.26548967 | 18.64770103  | 21.92474567 | 14.51936867 | 32.88849701 | 22.52092213 | 16.64887103 | 18.69933991 | 19.34625349 |
| ENSMUSG00000030577  | 0.133267031  | 1.521562018  | 0.07927692  | 0.778279708 | 0.999071534 | Cd22          | Cd22      | CD22         | 2.105401006 | 2.96450222  | 1.750325729  | 3.954780073 | 2.681505025 | 4.584016176 | 2.394465859 | 1.796143762 | 1.964216377 | 3.464025119 |
| ENSMUSG00000026021  | 0.08101352   | 7.531996243  | 0.079244955 | 0.778323243 | 0.999071534 | Sumo1         | Sumo1     | SUMO1        | 244.5072369 | 133.7583402 | 191.7953078  | 201.5550195 | 159.9092631 | 155.7110257 | 292.3189806 | 137.8194925 | 152.1874849 | 173.9202045 |
| ENSMUSG00000043207  | 0.074999639  | 5.710390646  | 0.079207664 | 0.778374045 | 0.999071534 | Zmpste24      | Zmpste24  | ZMPSTE24     | 57.19672734 | 72.74888449 | 44.96990719  | 39.75594705 | 50.55618011 | 87.53288031 | 76.23461572 | 35.9919577  | 26.16336215 | 43.4637114  |
| ENSMUSG00000002343  | -0.09340731  | 4.00424298   | 0.078985312 | 0.778677222 | 0.999071534 | Armc6         | Armc6     | ARMC6        | 17.47482835 | 15.94902195 | 13.80064517  | 19.42698983 | 18.50892493 | 26.19437815 | 23.62108212 | 9.187966168 | 5.892649132 | 13.0717929  |
| ENSMUSG00000026771  | 0.063602503  | 4.835820962  | 0.07898372  | 0.778679394 | 0.999071534 | Spopl         | Spopl     | SPOPL        | 33.40569597 | 34.38822576 | 27.93789144  | 21.36968882 | 27.79608868 | 30.85115649 | 34.42853613 | 28.04747567 | 21.44924284 | 26.01286787 |
| ENSMUSG00000036568  | 0.099566434  | 4.012205912  | 0.078964069 | 0.778706211 | 0.999071534 | Gltscr1l      | Gltscr1l  | GLTSCR1L     | 10.17610486 | 19.56571465 | 18.31109993  | 10.19916966 | 22.36767607 | 14.47967014 | 7.183397576 | 25.35326003 | 13.74951464 | 18.10443317 |
| ENSMUSG00000066878  | 0.197512689  | 6.399313152  | 0.078897281 | 0.77879738  | 0.999071534 | Gm10184       | Gm10184   | KPNA2        | 195.0303132 | 73.46036502 | 29.55357673  | 24.42250151 | 92.21761185 | 251.7570789 | 191.6866993 | 13.0565835  | 4.949825271 | 23.07171447 |
| ENSMUSG00000026196  | 0.097907877  | 2.996609719  | 0.078890033 | 0.778807277 | 0.999071534 | Bard1         | Bard1     | BARD1        | 6.947823321 | 6.284744707 | 9.424830848  | 7.84017804  | 8.829345815 | 13.75204853 | 7.959981098 | 6.63191543  | 6.364061063 | 5.490153018 |
| ENSMUSG00000000489  | 0.082090022  | 3.99336272   | 0.078889791 | 0.778807606 | 0.999071534 | Pdgfb         | Pdgfb     | PDGFB        | 19.43986929 | 16.83837261 | 15.95489222  | 11.86434022 | 15.89282247 | 27.06752409 | 16.63183042 | 8.911636359 | 13.98522061 | 13.66002358 |
| ENSMUSG00000026928  | 0.101535559  | 3.200422326  | 0.078813818 | 0.77891137  | 0.999071534 | Card9         | Card9     | CARD9        | 13.05348624 | 6.04758453  | 10.9058757   | 6.730064335 | 8.829345815 | 14.77071879 | 5.436084652 | 6.977327692 | 8.956826681 | 9.738485711 |
| ENSMUSG00000047473  | 0.123244994  | 2.620877782  | 0.078751664 | 0.778996299 | 0.999071534 | Zfp30         | Zfp30     | ZFP30        | 4.35116208  | 5.691844263 | 7.405224238  | 5.342422204 | 7.128879214 | 3.274297269 | 2.653327033 | 8.428059192 | 6.206923753 | 8.758101244 |
| ENSMUSG00000070327  | -0.067747181 | 5.876721402  | 0.078731938 | 0.77902326  | 0.999071534 | Rnf213        | Rnf213    | RNF213       | 58.95122818 | 66.34555969 | 67.8587821   | 54.25680732 | 64.48692573 | 102.7401721 | 31.58106322 | 49.60120082 | 43.05562299 | 57.97340152 |
| ENSMUSG00000028414  | 0.082018107  | 3.621028015  | 0.078718324 | 0.77904187  | 0.999071534 | Fktn          | Fktn      | FKTN         | 13.19384631 | 9.54569715  | 12.92548231  | 12.90507182 | 12.75349951 | 17.68120525 | 14.36679515 | 9.53337843  | 10.29249382 | 9.411690889 |
| ENSMUSG00000093319  | -0.291094354 | -0.594753471 | 0.078680621 | 0.779093417 | 0.999071534 | Gm25467       | Gm27854   |              | 0.070180034 | 0.177870133 | 0.1077123525 | 1.387642131 | 0.261610246 | 0.218286485 | 0           | 1.105319238 | 0.392843275 | 0.522871716 |
| ENSMUSG00000094344  | -0.096021435 | 4.578679236  | 0.078678062 | 0.779096917 | 0.999071534 | Gm11942       | Gm11942   |              | 24.49283171 | 14.64464097 | 23.22547602  | 44.40454819 | 18.96674286 | 16.58977283 | 22.8444986  | 14.71456236 | 19.95643839 | 35.22848187 |
| ENSMUSG00000021477  | 0.087470011  | 9.57683509   | 0.078668702 | 0.779109716 | 0.999071534 | Ctsl          | Ctsl      | CTSV         | 652.0426916 | 970.2222867 | 671.6538383  | 748.7716939 | 801.5083924 | 415.326418  | 922.5165085 | 1113.194638 | 594.8432877 | 671.5633603 |
| ENSMUSG00000000088  | -0.088651717 | 7.334263023  | 0.078663695 | 0.779116563 | 0.999071534 | Cox5a         | Cox5a     | COX5A        | 258.8239637 | 136.9600026 | 156.8561134  | 177.3406643 | 132.5709924 | 233.7120628 | 238.7347176 | 80.41197459 | 76.60443872 | 153.3974897 |
| ENSMUSG00000065979  | -0.069014    | 4.52884671   | 0.078661956 | 0.779118942 | 0.999071534 | Cpped1        | Cpped1    | CPPED1       | 24.91391191 | 28.28135118 | 23.22547602  | 20.53710354 | 25.3761939  | 32.96125917 | 23.75051271 | 21.6228076  | 11.62816095 | 21.43774036 |
| ENSMUSG000000000317 | 0.083709185  | 3.779041893  | 0.078637928 | 0.779151805 | 0.999071534 | Bcl6b         | Bcl6b     | BCL6B        | 13.05348624 | 17.01624274 | 15.48365068  | 11.93372233 | 11.05303291 | 23.0656052  | 11.77818341 | 8.635306549 | 12.02100423 | 13.52930565 |
| ENSMUSG000000046191 | -0.130467018 | 2.44692482   | 0.078432174 | 0.77943343  | 0.999071534 | Pcdhb20       | Pcdhb20   | PCDHB14      | 4.280982046 | 2.727342043 | 6.058819831  | 8.395234892 | 7.194281776 | 4.29296753  | 3.106334087 | 6.63191543  | 6.914041649 | 2.679717545 |
| ENSMUSG00000029601  | 0.21261296   | 0.053935941  | 0.078409923 | 0.77946391  | 0.999071534 | Iqcd          | Iqcd      | IQCD         | 1.824680872 | 0.889350666 | 0.403921322  | 0.901967385 | 0.39241537  | 0.582097292 | 0.711868228 | 1.036236786 | 1.807079067 | 0.326794823 |
| ENSMUSG00000028383  | -0.095676323 | 3.82870573   | 0.078386131 | 0.779496506 | 0.999071534 | Hsdl2         | Hsdl2     | HSDL2        | 9.053224327 | 19.20997439 | 19.79214478  | 11.03175494 | 16.54684808 | 17.75396741 | 9.319002261 | 21.83005496 | 7.621159544 | 10.26135743 |
| ENSMUSG00000006699  | -0.071875323 | 8.829176225  | 0.078342446 | 0.779556371 | 0.999071534 | Cdc42         | Cdc42     | CDC42        | 521.9289095 | 547.0099497 | 406.34485    | 453.1345379 | 494.1817554 | 544.3337303 | 567.1001168 | 367.3804818 | 306.5748922 | 384.833583  |
| ENSMUSG000000040151 | 0.061188125  | 6.025609258  | 0.078286549 | 0.779632995 | 0.999071534 | Hs2st1        | Hs2st1    | RP5-105215.2 | 61.40752935 | 76.30628715 | 59.98231632  | 64.31721277 | 68.41107943 | 88.76983706 | 84.71231916 | 56.92394077 | 45.88409458 | 49.93424888 |
| ENSMUSG000000021501 | 0.065207063  | 5.441999635  | 0.07828324  | 0.779637533 | 0.999071534 | Caml          | Caml      | CAMLG        | 45.89774194 | 31.18656336 | 42.27709837  | 52.17534412 | 47.6784674  | 36.16279428 | 50.41321362 | 47.52872725 | 34.57020824 | 43.39835243 |
| ENSMUSG000000808921 | 0.081363637  | 8.387164262  | 0.078200873 | 0.779750501 | 0.999071534 | RplB8-ps2     | RplB8-ps2 |              | 410.6233763 | 262.4770266 | 367.0298413  | 381.1852934 | 261.4140387 | 226.9451818 | 330.5010038 | 318.2628582 | 347.9805734 | 393.8531201 |
| ENSMUSG00000020829  | 0.127709723  | 2.423184696  | 0.078167164 | 0.779796751 | 0.999071534 | Slc46a1       | Slc46a1   | SLC46A1      | 3.158101509 | 5.454684085 | 5.654898509  | 5.342422204 | 6.278645913 | 7.567264798 | 7.571689337 | 3.799534882 | 1.099961171 | 7.450921954 |
| ENSMUSG00000038286  | -0.073052268 | 4.237085958  | 0.078154334 | 0.779814358 | 0.999071534 | Bphl          | Bphl      | BPHL         | 19.36968926 | 16.71979252 | 15.887572    | 21.78598146 | 25.83401183 | 17.0263458  | 16.76126101 | 18.92859196 | 16.18514295 | 18.36586903 |
| ENSMUSG00000042289  | -0.066898295 | 5.334782126  | 0.078128237 | 0.779850175 | 0.999071534 | Hsd3b7        | Hsd3b7    | HSD3B7       | 55.6527666  | 46.83913508 | 30.56338004  | 37.53571964 | 43.81971627 | 37.76356183 | 50.21906774 | 39.86057503 | 21.37067419 | 42.28725003 |
| ENSMUSG00000028826  | 0.063689741  | 5.119029687  | 0.078052237 | 0.779954519 | 0.999071534 | Tmem57        | Tmem57    | TMEM57       | 27.15967298 | 46.18694459 | 36.28559876  | 34.48290695 | 31.39322957 | 45.18530231 | 29.38074324 | 40.55139956 | 25.45624425 | 32.15661054 |
| ENSMUSG00000009575  | -0.069576428 | 7.034756244  | 0.078028139 | 0.779987616 | 0.999071534 | Cbx5          | Cbx5      | CBX5         | 134.9562045 | 123.6197426 | 154.7018663  | 130.9240351 | 152.4533711 | 222.5066899 | 117.5876883 | 83.93517966 | 85.48269675 | 129.5414676 |
| ENSMUSG00000038987  | 0.153722062  | 0.783653656  | 0.077966787 | 0.780071903 | 0.999071534 | 1700019L03Rik | Cfap157   | CFAP157      | 2.105401006 | 1.897281421 | 0.807842644  | 1.318260024 | 1.700466601 | 2.255627007 | 1.423736457 | 2.417885834 | 0.942823861 | 1.176461361 |
| ENSMUSG00000025060  | 0.058539762  | 6.362256283  | 0.077936049 | 0.780114146 | 0.999071534 | Slk           | Slk       | SLK          | 71.23273404 | 94.21188056 | 84.41955631  | 72.29615502 | 96.33797323 | 115.6190747 | 70.21609343 | 73.84914161 | 66.46908221 | 83.7901925  |

|                     |              |              |             |             |             |               |               |         |             |             |             |             |             |             |             |             |             |             |
|---------------------|--------------|--------------|-------------|-------------|-------------|---------------|---------------|---------|-------------|-------------|-------------|-------------|-------------|-------------|-------------|-------------|-------------|-------------|
| ENSMUSG00000066643  | 0.082833126  | 3.734700956  | 0.077930411 | 0.780121894 | 0.999071534 | Wdr35         | Wdr35         | WDR35   | 11.9306057  | 13.87387039 | 13.80064517 | 12.21125075 | 14.71557636 | 20.08235658 | 16.56711513 | 13.67832557 | 5.971217787 | 11.37245982 |
| ENSMUSG000000037606 | -0.074288246 | 4.767856416  | 0.077920254 | 0.780135855 | 0.999071534 | OsbpI5        | OsbpI5        | OSBPL5  | 28.77381375 | 36.46337731 | 23.15815558 | 23.72868044 | 32.76668336 | 39.21880506 | 18.76743511 | 35.37021563 | 13.59237733 | 24.1174579  |
| ENSMUSG000000027811 | 0.118123165  | 4.021106439  | 0.077686173 | 0.780457875 | 0.999071534 | 4930579G24Rik | 4930579G24Rik | C4orf46 | 28.98435385 | 11.50226861 | 8.347707322 | 16.44355925 | 15.10799173 | 30.70563216 | 27.63343032 | 4.421276953 | 9.742513232 | 12.22212636 |
| ENSMUSG000000029404 | 0.061995694  | 5.749248005  | 0.077670794 | 0.78047905  | 0.999071534 | Arl6ip4       | Arl6ip4       | ARL6IP4 | 62.17950972 | 38.30136869 | 62.94440602 | 54.32618943 | 54.61113893 | 46.13121041 | 60.44408411 | 51.19009722 | 47.7697243  | 56.01263258 |
| ENSMUSG000000028032 | -0.066984657 | 7.255847519  | 0.07762372  | 0.780543879 | 0.999071534 | Papss1        | Papss1        | PAPSS1  | 135.1667446 | 132.8096995 | 185.1306059 | 160.7583409 | 196.7963078 | 201.5511874 | 131.3073305 | 128.6315264 | 117.774414  | 149.8681056 |
| ENSMUSG000000031015 | 0.064001489  | 5.662026768  | 0.077616487 | 0.780553842 | 0.999071534 | Swap70        | Swap70        | SWAP70  | 61.33734932 | 72.51172431 | 37.16076163 | 36.42560594 | 50.35997243 | 67.01395076 | 41.35307253 | 51.60459194 | 38.65577831 | 53.46363296 |
| ENSMUSG000000024422 | -0.060262216 | 5.282938857  | 0.077612367 | 0.780559517 | 0.999071534 | Dhx16         | Dhx16         | DHX16   | 41.05531962 | 41.08800077 | 43.28690168 | 36.70313436 | 43.75431371 | 56.60896166 | 25.95083269 | 35.9919577  | 30.40606952 | 37.45068666 |
| ENSMUSG000000025226 | 0.096465456  | 3.02513917   | 0.07760621  | 0.780567998 | 0.999071534 | FbxI15        | FbxI15        | FBXL15  | 10.52700503 | 8.419186306 | 5.85685917  | 6.244389589 | 9.352566308 | 10.25946477 | 8.412988152 | 8.497141644 | 4.085570065 | 9.542408818 |
| ENSMUSG000000027324 | -0.224640813 | 0.518864089  | 0.07752078  | 0.780685718 | 0.999071534 | Rpusd2        | Rpusd2        | RPUSD2  | 1.894860906 | 1.837991377 | 0.875162864 | 1.318260024 | 1.308051232 | 4.074681045 | 1.48845175  | 0.345412262 | 0.471411931 | 0           |
| ENSMUSG000000020361 | -0.073526546 | 7.671603489  | 0.077502934 | 0.780710318 | 0.999071534 | Hspa4         | Hspa4         | HSP44   | 217.7686441 | 250.9154679 | 228.8214289 | 167.6271694 | 223.0881376 | 350.2042834 | 204.3061815 | 155.2282705 | 122.4885333 | 163.2666933 |
| ENSMUSG000000020160 | -0.125908655 | 2.233957188  | 0.077488186 | 0.78073065  | 0.999071534 | Meis1         | Meis1         | MEI51   | 1.824680872 | 4.98036373  | 5.049016526 | 5.273040098 | 7.586697145 | 5.311637791 | 2.265035272 | 5.250266382 | 4.32127603  | 3.856178906 |
| ENSMUSG000000050777 | -0.069590406 | 5.171484687  | 0.077444029 | 0.780791539 | 0.999071534 | Tmem37        | Tmem37        | TMEM37  | 48.28386308 | 27.09555029 | 41.67121639 | 42.53123131 | 30.80460651 | 30.41458352 | 40.57648901 | 27.56389851 | 25.53481291 | 44.70553172 |
| ENSMUSG000000048040 | -0.070556706 | 4.69869256   | 0.077440583 | 0.780796291 | 0.999071534 | Arxex2        | Arxex2        | SPC3    | 29.40543405 | 23.24169741 | 37.36272229 | 20.67586775 | 27.0766605  | 36.38108076 | 31.06334087 | 16.78703593 | 17.83508471 | 22.2874069  |
| ENSMUSG000000048647 | 0.117360653  | 2.40795863   | 0.077326911 | 0.780953122 | 0.999071534 | Exd1          | Exd1          | EXD1    | 5.193322482 | 5.276813952 | 4.847055865 | 6.105625376 | 4.251166504 | 3.856394561 | 2.78275762  | 6.770080335 | 6.576904338 | 4.901922338 |
| ENSMUSG000000049515 | -0.183955664 | 0.510730083  | 0.077293102 | 0.780999792 | 0.999071534 | Espnl         | Espnl         | ESPNL   | 0.491260235 | 2.430891821 | 0.673202203 | 1.665170557 | 1.831271725 | 0.9459081   | 0.453007054 | 1.174401691 | 1.021392516 | 2.156845829 |
| ENSMUSG000000022774 | 0.061103404  | 6.071623554  | 0.077253646 | 0.781054271 | 0.999071534 | Ncbp2         | Ncbp2         | NCBP2   | 68.77643287 | 53.30174992 | 72.90779863 | 76.04278878 | 69.13050761 | 76.32750744 | 80.44110979 | 58.44375473 | 62.06923753 | 52.94076125 |
| ENSMUSG000000071722 | -0.124907118 | 1.923425149  | 0.077222445 | 0.781097363 | 0.999071534 | Spin4         | Spin4         | SPIN4   | 2.38612114  | 4.743203553 | 3.971893    | 4.093544286 | 4.578179312 | 5.529924276 | 4.012348196 | 2.832380548 | 3.221314859 | 1.568615148 |
| ENSMUSG000000041607 | 0.10722853   | 3.068938182  | 0.07721357  | 0.781109622 | 0.999071534 | Mbp           | Mbp           | MBP     | 8.91286426  | 8.656346483 | 6.597381593 | 5.203657991 | 12.23027902 | 8.222124252 | 5.694945826 | 13.33291331 | 4.085570065 | 10.32671639 |
| ENSMUSG000000025578 | 0.097119757  | 3.042622272  | 0.077184248 | 0.78115013  | 0.999071534 | Cbx8          | Cbx8          | CBX8    | 10.94808523 | 8.952796705 | 8.549667983 | 4.579219032 | 7.913709953 | 9.822891806 | 6.147952881 | 8.842553906 | 8.092571475 | 7.385562989 |
| ENSMUSG000000042207 | -0.08827596  | 5.545453901  | 0.077084283 | 0.78128829  | 0.999071534 | Kdm5b         | Kdm5b         | KDM5B   | 35.65145704 | 65.93052938 | 45.71042961 | 44.19640187 | 58.01207214 | 33.90716727 | 19.8028798  | 78.68491328 | 30.7989128  | 52.09109471 |
| ENSMUSG000000031622 | -0.059540673 | 6.772009018  | 0.077077358 | 0.781297865 | 0.999071534 | Sin3b         | Sin3b         | SIN3B   | 114.8847149 | 120.2402101 | 123.3979639 | 101.9916966 | 118.5748442 | 109.8708639 | 100.5675661 | 120.5488794 | 77.54726258 | 108.3651631 |
| ENSMUSG000000097085 | 0.320359217  | -0.523624483 | 0.077042718 | 0.781345765 | 0.999071534 | Gm26634       | Gm26634       |         | 0.701800335 | 0.5336104   | 1.279084186 | 0           | 0.196207685 | 0.509335131 | 0           | 0.345412262 | 1.885647722 | 0.065358965 |
| ENSMUSG000000022126 | -0.168405    | 1.668299051  | 0.076922766 | 0.781511726 | 0.999071534 | Irg1          | Acod1         | ACOD1   | 8.000523824 | 4.209593153 | 2.154247051 | 1.318260024 | 1.24264867  | 2.255627007 | 0.776583522 | 3.108710358 | 2.514196963 | 4.967281302 |
| ENSMUSG000000022008 | 0.057950647  | 5.503115875  | 0.076913678 | 0.781524305 | 0.999071534 | Gpalpp1       | Gpalpp1       | GPALPP1 | 52.98592532 | 51.28588841 | 39.51696934 | 41.97617446 | 44.66994957 | 49.69655632 | 52.80767948 | 49.25578856 | 31.82030531 | 40.45719903 |
| ENSMUSG000000021218 | 0.068531693  | 8.995798788  | 0.076869031 | 0.781586115 | 0.999071534 | Gdi2          | Gdi2          | GDI2    | 507.2612824 | 584.3033876 | 437.3794716 | 500.5918988 | 559.1264991 | 541.2777196 | 587.6795801 | 515.6314247 | 393.628962  | 488.6889776 |
| ENSMUSG000000020137 | -0.085303349 | 3.673956649  | 0.076859084 | 0.78159989  | 0.999071534 | Thap2         | Thap2         | THAP2   | 14.17636678 | 13.45884008 | 7.270583797 | 16.929234   | 15.5004071  | 16.80805931 | 13.00777399 | 10.0169556  | 9.899650542 | 10.19599846 |
| ENSMUSG000000026437 | 0.146031106  | 1.626398438  | 0.076794799 | 0.781688929 | 0.999071534 | Cdk18         | Cdk18         | CDK18   | 3.017741442 | 3.201662398 | 4.981696305 | 1.318260024 | 2.092881971 | 7.494502637 | 2.912188207 | 1.72706131  | 2.042785033 | 1.699333077 |
| ENSMUSG000000046519 | 0.0702643    | 4.670323494  | 0.076780655 | 0.781708525 | 0.999071534 | Golph3l       | Golph3l       | GOLPH3L | 22.52779077 | 30.83082309 | 18.04181905 | 26.98963945 | 29.88897065 | 24.88465924 | 27.37456914 | 32.39967017 | 15.71373102 | 25.42463719 |
| ENSMUSG000000040522 | -0.287089435 | 1.61279768   | 0.076712858 | 0.781802481 | 0.999071534 | Tlr8          | Tlr8          | TLR8    | 5.333682549 | 8.893506661 | 0.336601102 | 0.485674746 | 1.765869163 | 8.876983706 | 4.400639957 | 1.036236786 | 0           | 0           |
| ENSMUSG000000047281 | 0.181825202  | 0.596984332  | 0.076706624 | 0.781811122 | 0.999071534 | Sfn           | Sfn           | SFN     | 1.19306057  | 0.948640711 | 1.88496617  | 1.665170557 | 0.981038424 | 3.201535107 | 0.258861174 | 2.003391119 | 1.178529826 | 0.71894861  |
| ENSMUSG000000072889 | 0.065419408  | 5.225371867  | 0.07669783  | 0.781823313 | 0.999071534 | NfxI1         | NfxI1         | NFXL1   | 29.26507399 | 27.33271047 | 40.52677265 | 44.82084083 | 46.50122129 | 45.25806447 | 29.63960441 | 41.17314163 | 29.30610835 | 39.67289145 |
| ENSMUSG000000022365 | -0.069830605 | 7.338833481  | 0.076668647 | 0.781863775 | 0.999071534 | DerI1         | DerI1         | DERL1   | 184.4331281 | 198.5623587 | 135.8522046 | 163.7417715 | 178.6143957 | 183.1423606 | 216.990379  | 141.0663678 | 92.08246377 | 141.3714402 |
| ENSMUSG000000041733 | -0.074982521 | 4.306486076  | 0.076624784 | 0.781924604 | 0.999071534 | Coq5          | Coq5          | COQ5    | 19.58022936 | 20.39577528 | 22.08103227 | 18.38625824 | 24.39515548 | 22.70179439 | 25.7566868  | 17.75419027 | 16.26371161 | 10.26135743 |
| ENSMUSG000000096942 | 0.222787051  | 0.311445672  | 0.076509688 | 0.782084311 | 0.999071534 | Rps19-ps6     | Rps19-ps6     |         | 0.491260235 | 0.592900444 | 1.683005509 | 1.179495811 | 1.308051232 | 0.654859454 | 0.841298815 | 1.381649048 | 0           | 2.941153403 |
| ENSMUSG000000087549 | -0.299056495 | -0.754232189 | 0.076481364 | 0.782123632 | 0.999071534 | Gm13427       | Gm13427       |         | 0.280720134 | 0           | 1.211763966 | 0.416292639 | 0.784830739 | 0.218286485 | 0.064715293 | 0.483577167 | 1.021392516 | 0.065358965 |
| ENSMUSG000000022012 | -0.121307818 | 2.16822014   | 0.076387901 | 0.782253443 | 0.999071534 | Enox1         | Enox1         | ENOX1   | 2.38612114  | 7.470545595 | 5.92417939  | 3.191576901 | 4.643581873 | 5.311637791 | 4.335924663 | 3.17779281  | 4.478413341 | 2.810435474 |
| ENSMUSG000000041346 | -0.083969316 | 3.576922664  | 0.076346805 | 0.782310547 | 0.999071534 | Wrap53        | Wrap53        | WRAP53  | 15.36942735 | 10.37575777 | 11.98299922 | 13.66827499 | 11.5762534  | 19.13644848 | 10.03807049 | 8.289894287 | 7.778296855 | 11.76461361 |
| ENSMUSG000000014856 | 0.089384655  | 5.345297327  | 0.076241758 | 0.782456591 | 0.999071534 | Tmem208       | Tmem208       | TMEM208 | 61.40752935 | 38.65710895 | 24.30259954 | 42.80875974 | 36.88704474 | 46.20397257 | 82.44728389 | 23.90252853 | 21.29210553 | 32.15661054 |
| ENSMUSG000000025969 | 0.065147674  | 7.136954948  | 0.076184698 | 0.782535964 | 0.999071534 | Nrp2          | Nrp2          | NRP2    | 129.5523419 | 169.1544967 | 131.2744297 | 111.358281  | 175.0172548 | 197.0399334 | 140.7557633 | 138.0958223 | 111.4103529 | 116.2735979 |

|                     |              |             |             |             |             |          |          |            |             |             |             |             |             |             |             |             |             |             |
|---------------------|--------------|-------------|-------------|-------------|-------------|----------|----------|------------|-------------|-------------|-------------|-------------|-------------|-------------|-------------|-------------|-------------|-------------|
| ENSMUSG00000020700  | -0.118203451 | 4.042406579 | 0.076133164 | 0.782607678 | 0.999071534 | Map3k3   | Map3k3   | MAP3K3     | 25.40517214 | 29.1114118  | 9.222870187 | 8.256470679 | 17.26627626 | 33.90716727 | 22.32677625 | 9.53337843  | 4.32127603  | 11.045665   |
| ENSMUSG00000038827  | -0.102618008 | 3.359510931 | 0.076125476 | 0.782618379 | 0.999071534 | BC026590 | Fam206a  | FAM206A    | 10.59718506 | 10.67220799 | 8.953589305 | 12.48877918 | 11.64165596 | 20.95550252 | 11.32517636 | 5.526596192 | 3.614158135 | 8.823460208 |
| ENSMUSG00000034471  | 0.073843035  | 4.027192366 | 0.076077368 | 0.782685354 | 0.999071534 | Caskin2  | Caskin2  | CASKIN2    | 14.45708691 | 17.90559341 | 17.97449883 | 14.50086027 | 17.00466601 | 23.21112953 | 11.26046107 | 16.99428329 | 14.84947581 | 14.37897219 |
| ENSMUSG00000028427  | -0.27422559  | -0.10525266 | 0.076069565 | 0.782696218 | 0.999071534 | Aqp7     | Aqp7     | FP325317.1 | 0.912340436 | 0.237160178 | 0.336601102 | 2.428373729 | 0.588623054 | 0.072762162 | 0.064715293 | 0.138164905 | 1.571373102 | 1.372538255 |
| ENSMUSG00000004552  | 0.157066031  | 1.44886343  | 0.076048455 | 0.782725615 | 0.999071534 | Ctse     | Ctse     | CTSE       | 2.526481208 | 3.913142931 | 2.894769475 | 0.277528426 | 3.27012808  | 4.584016176 | 3.494625848 | 2.141556024 | 1.335667137 | 2.156845829 |
| ENSMUSG00000038550  | 0.158784523  | 2.260269114 | 0.076015457 | 0.782771577 | 0.999071534 | Gm129    | Clart    | CIART      | 1.052700503 | 8.004155995 | 5.250977187 | 3.052812688 | 5.559217736 | 2.328389169 | 1.359021163 | 9.395213526 | 5.106962581 | 4.575127515 |
| ENSMUSG00000021918  | -0.117908369 | 3.006625808 | 0.076008028 | 0.782781925 | 0.999071534 | Nek4     | Nek4     | NEK4       | 9.755024662 | 13.28096995 | 4.443134543 | 4.926129565 | 10.66061754 | 13.2427134  | 11.38989165 | 5.872008453 | 4.00700141  | 3.594743048 |
| ENSMUSG000000097055 | 0.206250434  | 0.904053284 | 0.075977092 | 0.782825026 | 0.999071534 | Gm4419   | Gm4419   |            | 1.614140771 | 0.592900444 | 1.683005509 | 3.885397967 | 0.523220493 | 0.800383777 | 0.388291761 | 1.036236786 | 4.242707375 | 1.830051006 |
| ENSMUSG00000020736  | 0.074094151  | 5.558179013 | 0.075910246 | 0.782918191 | 0.999071534 | Nt5c     | Nt5c     | NTSC       | 74.60137565 | 44.64540344 | 44.70062631 | 33.65032168 | 41.39982149 | 54.20781033 | 77.52892159 | 30.81077377 | 31.97744262 | 41.17614764 |
| ENSMUSG00000039770  | -0.060760909 | 6.404138055 | 0.075862609 | 0.78298461  | 0.999071534 | YpeI5    | YpeI5    | YPEL5      | 87.23378169 | 99.13295425 | 80.17838243 | 94.01275437 | 87.11621205 | 68.46919399 | 92.21929321 | 87.59654964 | 59.86931518 | 89.34570448 |
| ENSMUSG00000029708  | -0.100427398 | 3.301201769 | 0.075854856 | 0.782995421 | 0.999071534 | Gcc1     | Gcc1     | GCC1       | 7.298723488 | 15.94902195 | 7.472544458 | 9.366584384 | 12.23027902 | 16.66253499 | 6.406814054 | 9.602460883 | 4.32127603  | 10.26135743 |
| ENSMUSG000000065147 | -0.177457075 | 1.083984747 | 0.07581801  | 0.783046813 | 0.999071534 | Snora31  | Snora31  | SNORA31    | 1.122880537 | 0.830060622 | 3.635291898 | 4.02416218  | 1.177246109 | 0.9459081   | 0.647152935 | 1.796143762 | 2.435628308 | 2.810435474 |
| ENSMUSG00000035696  | 0.069321247  | 4.471080173 | 0.075805609 | 0.783064113 | 0.999071534 | Rnf38    | Rnf38    | RNF38      | 18.24680872 | 23.24169741 | 23.76403778 | 18.38625824 | 28.31930917 | 26.55818896 | 15.72581632 | 27.2875687  | 18.38506529 | 21.24166346 |
| ENSMUSG00000025329  | 0.182905481  | 0.23989149  | 0.075741301 | 0.783153848 | 0.999071534 | PadI1    | PadI1    | PADI1      | 1.754500839 | 0.652190488 | 1.009803305 | 0.485674746 | 1.24264867  | 1.236956746 | 1.68259763  | 1.312566595 | 0.785686551 | 0.392153787 |
| ENSMUSG00000022687  | 0.116605909  | 2.537868364 | 0.075676457 | 0.783244373 | 0.999071534 | Boc      | Boc      | BOC        | 4.702062247 | 10.43504782 | 3.231370576 | 5.966861163 | 3.858751134 | 9.09527019  | 4.659051131 | 6.977327692 | 3.064177549 | 5.555511983 |
| ENSMUSG00000024392  | -0.070571857 | 7.096627628 | 0.075638363 | 0.783297572 | 0.999071534 | Bag6     | Bag6     | BAG6       | 138.044126  | 162.3954316 | 140.9685414 | 118.7127843 | 169.327232  | 167.2802093 | 74.68144868 | 158.198816  | 98.83936811 | 150.3909773 |
| ENSMUSG00000028483  | 0.083877269  | 3.814318699 | 0.075632945 | 0.78330514  | 0.999071534 | Snapc3   | Snapc3   | SNAPC3     | 11.9306057  | 10.25717768 | 21.40783007 | 11.79495811 | 14.84638148 | 11.93299449 | 13.20191987 | 15.9580465  | 12.41384751 | 14.83648494 |
| ENSMUSG000000037499 | 0.072830436  | 5.599242996 | 0.075557446 | 0.783410625 | 0.999071534 | Nenf     | Nenf     | NENF       | 44.1432411  | 39.48716958 | 44.43134543 | 64.80288752 | 50.35997243 | 30.56010784 | 59.34392412 | 60.79255811 | 31.42746204 | 54.77081226 |
| ENSMUSG00000026219  | -0.070976221 | 7.53095068  | 0.075545441 | 0.783427403 | 0.999071534 | Trip12   | Trip12   | TRIP12     | 157.2032751 | 258.1488533 | 159.9528435 | 188.2336551 | 220.2104249 | 199.4410847 | 138.037721  | 205.9347906 | 132.0739092 | 198.1030214 |
| ENSMUSG00000023795  | -0.106731664 | 2.392925154 | 0.075431518 | 0.783586693 | 0.999071534 | Pisd-ps2 | Pisd-ps2 |            | 6.456563086 | 6.46261484  | 4.779735644 | 3.607869541 | 6.409451036 | 4.438491853 | 4.788931717 | 6.148338263 | 2.907040239 | 5.555511983 |
| ENSMUSG00000032657  | -0.127928051 | 1.473142765 | 0.075419526 | 0.783603469 | 0.999071534 | Fam189b  | Fam189b  | FAM189B    | 2.666841275 | 2.01586151  | 4.106533441 | 2.289609516 | 3.27012808  | 3.419821592 | 1.941458804 | 1.72706131  | 2.592765618 | 2.548999616 |
| ENSMUSG00000032561  | 0.085167301  | 6.185605152 | 0.075327231 | 0.783732623 | 0.999071534 | Acpp     | Acpp     | ACPP       | 52.42448506 | 88.69790643 | 50.42284504 | 79.65065832 | 94.57210407 | 61.77507513 | 35.65812671 | 112.1208202 | 78.72579241 | 63.13675971 |
| ENSMUSG00000020430  | 0.064472252  | 6.397466421 | 0.075177159 | 0.783942812 | 0.999071534 | Pes1     | Pes1     | PES1       | 96.21682599 | 97.35425292 | 88.32412909 | 66.25991175 | 80.44515076 | 135.2648583 | 99.2085449  | 52.15725156 | 56.64800033 | 84.705218   |
| ENSMUSG00000029714  | 0.087903342  | 5.154385943 | 0.075143383 | 0.78399015  | 0.999071534 | Gigyf1   | Gigyf1   | GIGYF1     | 35.23037684 | 32.43165429 | 40.32481198 | 26.64272891 | 44.66994957 | 27.50409706 | 13.00777399 | 53.12440589 | 31.89887397 | 47.45060823 |
| ENSMUSG00000018572  | -0.05928742  | 6.192331731 | 0.075140008 | 0.783994881 | 0.999071534 | Phf23    | Phf23    | PHF23      | 73.33813505 | 83.89541284 | 86.0352416  | 57.79529476 | 87.05080948 | 83.82201007 | 66.4626064  | 86.83664266 | 49.65539002 | 61.17599078 |
| ENSMUSG000000075284 | -0.056078789 | 6.186795614 | 0.075112674 | 0.784033199 | 0.999071534 | Wipf1    | Wipf1    | WIPF1      | 82.18081928 | 84.7847635  | 66.10845638 | 66.95373282 | 85.80816081 | 94.59080998 | 63.67984878 | 64.45392808 | 58.76935401 | 66.01255415 |
| ENSMUSG000000079659 | 0.079277332  | 4.590421779 | 0.075051185 | 0.784119425 | 0.999071534 | Tmem243  | Tmem243  | TMEM243    | 20.28202969 | 18.14275359 | 28.20717232 | 31.43009427 | 22.04066326 | 16.80805931 | 19.34987275 | 25.90591965 | 26.71334273 | 26.53573959 |
| ENSMUSG000000064128 | 0.084671171  | 3.622846619 | 0.074987366 | 0.784208957 | 0.999071534 | Cenpj    | Cenpj    | CENPJ      | 12.21132584 | 8.537766395 | 14.06992605 | 12.6969255  | 13.7999405  | 14.47967014 | 9.319002261 | 10.0169556  | 14.6923385  | 11.24174189 |
| ENSMUSG000000045211 | -0.072918548 | 4.151754699 | 0.074971046 | 0.78423186  | 0.999071534 | Nudt18   | Nudt18   | NUDT18     | 18.03626862 | 20.51435536 | 20.80194809 | 16.37417715 | 18.24731469 | 14.47967014 | 14.30207986 | 19.89574629 | 12.2567102  | 21.63381725 |
| ENSMUSG000000001270 | 0.179155319  | 5.589922765 | 0.074963422 | 0.784242559 | 0.999071534 | Ckb      | Ckb      | CKB        | 141.9742079 | 18.14275359 | 26.59148704 | 21.71659935 | 28.64632198 | 77.12789121 | 145.8682715 | 5.112101477 | 11.23531768 | 21.11094554 |
| ENSMUSG000000013523 | 0.141871986  | 1.8810825   | 0.074960404 | 0.784246795 | 0.999071534 | Bcas1    | Bcas1    | BCAS1      | 3.859901845 | 3.616692709 | 3.433331237 | 3.746633754 | 2.812310149 | 8.949745867 | 1.229590576 | 2.832380548 | 1.178529826 | 5.097999231 |
| ENSMUSG00000036856  | 0.145648493  | 3.146329895 | 0.074938637 | 0.784277347 | 0.999071534 | Wnt4     | Wnt4     | WNT4       | 4.280982046 | 7.114805329 | 14.60848781 | 6.799446442 | 10.20279961 | 4.438491853 | 1.229590576 | 14.30006765 | 10.05678785 | 12.35284429 |
| ENSMUSG000000001761 | -0.06042803  | 5.715209882 | 0.07493812  | 0.784278074 | 0.999071534 | Smo      | Smo      | SMO        | 61.61806945 | 69.36935196 | 50.2882046  | 40.38038601 | 57.42344908 | 77.70988851 | 57.33775002 | 45.31808877 | 33.78452169 | 39.93432731 |
| ENSMUSG000000031226 | 0.063399879  | 6.618155521 | 0.074933087 | 0.784285139 | 0.999071534 | Pbdc1    | Pbdc1    | PBDC1      | 94.32196508 | 70.67373293 | 125.8214918 | 106.2933872 | 99.60810131 | 98.5199667  | 109.5629919 | 83.38252004 | 78.49008644 | 113.6592393 |
| ENSMUSG000000061175 | 0.096136445  | 5.140438985 | 0.07480948  | 0.784458733 | 0.999071534 | Fnip2    | Fnip2    | FNIP2      | 24.84373187 | 52.05665899 | 36.48755943 | 27.68346051 | 35.64439607 | 32.08811323 | 18.8321504  | 77.7868414  | 18.30649664 | 28.1697137  |
| ENSMUSG000000030788 | 0.070221634  | 5.080072681 | 0.0747992   | 0.784473178 | 0.999071534 | Rnf141   | Rnf141   | RNF141     | 42.03784009 | 33.380295   | 28.20717232 | 32.60959008 | 34.72876021 | 45.25806447 | 52.28995713 | 30.3271966  | 16.02800564 | 27.45076509 |
| ENSMUSG000000058745 | 0.257553078  | 1.012257023 | 0.074780999 | 0.784498754 | 0.999071534 | Gm9174   | Gm9174   |            | 3.228281543 | 2.134441599 | 0.201960661 | 2.22022741  | 1.046440986 | 3.710870238 | 4.530070544 | 0           | 0           | 2.352922722 |
| ENSMUSG000000007827 | -0.116377692 | 2.975382611 | 0.074736617 | 0.784561136 | 0.999071534 | Ankrd26  | Ankrd26  | ANKRD36    | 3.649361744 | 5.51397413  | 14.60848781 | 7.493267507 | 10.39900729 | 13.97033501 | 8.607134033 | 5.664761096 | 3.928432755 | 5.294076125 |
| ENSMUSG000000032012 | -0.076854338 | 4.286869819 | 0.074693088 | 0.784622337 | 0.999071534 | PvrI1    | Nectin1  | NECTIN1    | 18.03626862 | 26.14690958 | 26.99540836 | 13.94580342 | 18.50892493 | 27.06752409 | 13.65492692 | 24.10977589 | 11.70672961 | 16.47045906 |

|                     |              |              |             |             |             |               |               |         |             |             |             |             |             |             |             |             |             |             |
|---------------------|--------------|--------------|-------------|-------------|-------------|---------------|---------------|---------|-------------|-------------|-------------|-------------|-------------|-------------|-------------|-------------|-------------|-------------|
| ENSMUSG00000030102  | -0.067064615 | 5.042073074  | 0.074565415 | 0.784801955 | 0.999071534 | ltpr1         | ltpr1         | ITPR1   | 29.26507399 | 34.4475158  | 33.79475061 | 39.82532916 | 36.49462937 | 54.78990763 | 32.09878557 | 20.79381817 | 18.77790857 | 34.18273844 |
| ENSMUSG000000021493 | 0.06648019   | 6.819923805  | 0.074522974 | 0.7848617   | 0.999071534 | Pdlm7         | Pdlm7         | PDLIM7  | 94.04124495 | 96.70206243 | 156.9234336 | 109.0686715 | 114.716093  | 143.268696  | 77.46420629 | 130.4967526 | 90.9825026  | 118.4958026 |
| ENSMUSG000000006390 | -0.059868859 | 5.52949739   | 0.074517527 | 0.784869369 | 0.999071534 | Elov1         | Elov1         | ELOVL1  | 51.23142449 | 49.74434726 | 45.97971049 | 37.81324807 | 60.36656435 | 62.79374539 | 54.81385358 | 33.91948413 | 33.86309035 | 36.14350737 |
| ENSMUSG00000030802  | -0.05547987  | 5.836775362  | 0.07450464  | 0.784887515 | 0.999071534 | Bckdk         | Bckdk         | BCKDK   | 66.81139193 | 59.34933445 | 66.24309682 | 54.67309996 | 54.80734662 | 70.79758316 | 63.35627232 | 43.2456152  | 46.90548709 | 47.77740305 |
| ENSMUSG00000035873  | -0.152587952 | 1.668851976  | 0.074457361 | 0.7849541   | 0.999071534 | Pawr          | Pawr          | PAWR    | 2.877381375 | 1.897281421 | 2.625488593 | 4.093544286 | 5.101399804 | 7.858313444 | 1.359021163 | 3.45412262  | 0.942823861 | 1.437897219 |
| ENSMUSG00000026279  | -0.065054125 | 4.859496245  | 0.074335471 | 0.78512587  | 0.999071534 | Thap4         | Thap4         | THAP4   | 33.75659613 | 34.68467598 | 27.73593078 | 21.30030671 | 36.82164218 | 32.08811323 | 24.7859574  | 34.47214374 | 16.73512354 | 29.86904678 |
| ENSMUSG00000029530  | -0.158193311 | 0.443060911  | 0.074328747 | 0.78513535  | 0.999071534 | Ccr9          | Ccr9          | CCR9    | 1.543960738 | 2.075151554 | 0.942483085 | 1.040731598 | 1.111843547 | 1.091432423 | 1.553167044 | 0.828989429 | 0.864255206 | 1.241820326 |
| ENSMUSG00000073700  | -0.06372756  | 5.372611866  | 0.0742004   | 0.785316392 | 0.999071534 | Klh121        | Klh121        | KLHL21  | 45.1959416  | 58.22282361 | 35.14115502 | 34.48290695 | 46.95903923 | 52.02494549 | 27.63343032 | 43.3837801  | 26.71334273 | 48.10419788 |
| ENSMUSG00000049439  | 0.08731694   | 5.233919542  | 0.074161772 | 0.785370912 | 0.999071534 | Cyp20a1       | Cyp20a1       | CYP20A1 | 41.12549966 | 47.25416539 | 24.57188042 | 33.44217536 | 43.03488553 | 50.13312929 | 73.77543457 | 27.90931077 | 14.06378926 | 27.18932923 |
| ENSMUSG00000059897  | -0.145177412 | 2.014746868  | 0.074154566 | 0.785381085 | 0.999071534 | Zfp930        | Zfp930        | ZNF788  | 4.772242281 | 7.885575906 | 2.01960661  | 3.746633754 | 2.87771271  | 5.602686437 | 7.183397576 | 2.141556024 | 0.864255206 | 2.941153403 |
| ENSMUSG000000403716 | 0.072259283  | 10.42786435  | 0.074152449 | 0.785384074 | 0.999071534 | Rpl7          | Rpl7          | RPL7    | 1559.891606 | 1409.502226 | 1256.464592 | 1350.453322 | 1399.614818 | 1072.15045  | 1660.270854 | 1482.302181 | 1103.653898 | 1423.779683 |
| ENSMUSG00000018796  | -0.082777153 | 4.02539019   | 0.07410831  | 0.785446394 | 0.999071534 | Acs1          | Acs1          | ACSL1   | 21.68563036 | 18.97281421 | 9.626791509 | 19.49637194 | 16.41604296 | 22.48350791 | 19.60873392 | 9.049801264 | 11.47102364 | 14.70576701 |
| ENSMUSG00000049184  | -0.099596086 | 3.17073082   | 0.074044264 | 0.785536858 | 0.999071534 | Purg          | Purg          | PURG    | 6.807463254 | 7.174095373 | 11.78103856 | 11.72557601 | 9.875786801 | 5.675448599 | 6.471529348 | 10.0169556  | 8.721120716 | 9.346331924 |
| ENSMUSG00000057058  | -0.144305753 | 1.633574071  | 0.0740424   | 0.785539493 | 0.999071534 | Skap1         | Skap1         | SKAP1   | 2.035220973 | 1.660121243 | 4.577774983 | 5.411804311 | 2.289089656 | 2.837724299 | 1.423736457 | 1.865226215 | 2.907040239 | 4.444409586 |
| ENSMUSG000000097101 | -0.241736719 | -0.397748055 | 0.073929074 | 0.785699669 | 0.999071534 | 1810034E14Rik | 1810034E14Rik |         | 0.631620302 | 0.652190488 | 0.06732022  | 1.248877918 | 0.915635862 | 1.018670261 | 0.453007054 | 0.138164905 | 1.021392516 | 0.130717929 |
| ENSMUSG000000032396 | 0.082626147  | 3.878209142  | 0.073915882 | 0.785718323 | 0.999071534 | Dis3l         | Dis3l         | DIS3L   | 16.42212785 | 19.80287483 | 13.80064517 | 7.562649614 | 16.48144552 | 21.97417278 | 14.56094103 | 14.78364481 | 12.09957289 | 10.06528053 |
| ENSMUSG00000019433  | -0.055276843 | 5.559994904  | 0.073915209 | 0.785719276 | 0.999071534 | Gipc1         | Gipc1         | GIPC1   | 54.67024613 | 47.90635588 | 47.93199688 | 43.29443449 | 55.72298248 | 56.46343734 | 54.74913828 | 44.55818179 | 31.89887397 | 37.84284045 |
| ENSMUSG000000051285 | 0.072170174  | 5.559727026  | 0.073860303 | 0.785796936 | 0.999071534 | Pcmt1         | Pcmt1         | PCMTD1  | 37.40595788 | 42.51096184 | 57.22218729 | 51.41214095 | 48.72490839 | 39.65537803 | 26.40383974 | 55.68045663 | 52.95527354 | 51.89501782 |
| ENSMUSG000000021484 | -0.067741143 | 7.314132244  | 0.073858677 | 0.785799237 | 0.999071534 | Lman2         | Lman2         | LMAN2   | 187.4508696 | 195.8943067 | 138.9489348 | 162.0766009 | 161.2173143 | 211.0830306 | 200.8115557 | 117.5092515 | 107.9533321 | 126.7310322 |
| ENSMUSG000000058402 | 0.119005647  | 2.154154507  | 0.073827162 | 0.785843826 | 0.999071534 | Zfp420        | Zfp420        | ZNF420  | 4.912602348 | 4.150303108 | 4.039213221 | 5.411804311 | 2.87771271  | 2.328389169 | 4.27120937  | 5.664761096 | 4.792687961 | 3.92153787  |
| ENSMUSG00000015149  | -0.080407476 | 5.839072371  | 0.07367216  | 0.786063285 | 0.999071534 | Sirt2         | Sirt2         | SIRT2   | 42.38874026 | 76.18770706 | 57.55878839 | 53.07731151 | 76.06317914 | 39.00051858 | 28.92773619 | 86.21490059 | 53.11241085 | 53.59435089 |
| ENSMUSG000000086475 | -0.196627404 | 0.312081361  | 0.073660633 | 0.786079615 | 0.999071534 | Gm12139       | Platr13       |         | 0.701800335 | 0.770770577 | 0.942483085 | 3.191576901 | 0.39241537  | 0.727621615 | 1.359021163 | 0.483577167 | 0.864255206 | 1.503256184 |
| ENSMUSG000000070426 | 0.097455052  | 4.76382573   | 0.073652087 | 0.786091723 | 0.999071534 | Rnf121        | Rnf121        | RNF121  | 39.72189898 | 38.41994878 | 16.49345398 | 17.83120138 | 24.13354523 | 33.32506998 | 56.10815945 | 18.8595095  | 16.02800564 | 13.39858772 |
| ENSMUSG000000028497 | 0.072929258  | 5.208889629  | 0.073642736 | 0.786104973 | 0.999071534 | Ptplad2       | Hacd4         | HACD4   | 29.75633422 | 35.69260673 | 28.88037453 | 55.99135999 | 34.46714996 | 28.59552948 | 42.32380194 | 44.07460463 | 34.02027266 | 30.13048264 |
| ENSMUSG000000025408 | 0.101380078  | 5.733308941  | 0.073635545 | 0.786115162 | 0.999071534 | Ddit3         | Ddit3         | DDIT3   | 38.03757818 | 87.15636528 | 52.77905275 | 40.10285759 | 48.39789558 | 17.9722539  | 32.35764674 | 95.95552638 | 44.70556475 | 64.83609279 |
| ENSMUSG000000072568 | 0.112497978  | 2.24985137   | 0.07361201  | 0.786148514 | 0.999071534 | Fam84b        | Fam84b        | FAM84B  | 3.298461576 | 6.344034752 | 4.914376085 | 4.648601139 | 3.793348573 | 7.203453991 | 2.912188207 | 6.424668073 | 3.142746204 | 3.986896835 |
| ENSMUSG000000021412 | -0.112903096 | 3.468595856  | 0.073565513 | 0.786214424 | 0.999071534 | Mlst8         | Mlst8         | MLST8   | 17.19410822 | 11.38368853 | 10.97319592 | 8.325852786 | 11.44544828 | 23.35665385 | 12.68419752 | 4.006782239 | 3.221314859 | 11.17638293 |
| ENSMUSG000000030876 | 0.059835122  | 6.652392507  | 0.073469016 | 0.78635128  | 0.999071534 | Mett19        | Mett19        | METTL9  | 95.51502565 | 91.66240865 | 94.9888309  | 115.9375    | 111.3151598 | 97.5740586  | 91.76628615 | 110.3246765 | 91.92532646 | 98.49595951 |
| ENSMUSG000000074649 | -0.055651078 | 5.248638166  | 0.073462103 | 0.786361089 | 0.999071534 | BC029722      | BC029722      |         | 40.77459949 | 40.19865011 | 36.82416053 | 37.53571964 | 45.38937775 | 37.90908615 | 38.50559962 | 33.57407186 | 28.28471584 | 41.30686557 |
| ENSMUSG000000030265 | 0.058930165  | 5.66886265   | 0.073311471 | 0.786574925 | 0.999071534 | Kras          | Kras          | KRAS    | 44.9854015  | 48.67712646 | 51.90388988 | 54.81186417 | 57.29264396 | 77.27341554 | 59.92636176 | 46.42340801 | 35.74873807 | 36.40494323 |
| ENSMUSG000000052749 | 0.174347241  | 0.62589781   | 0.073236932 | 0.786680828 | 0.999071534 | Trim30b       | Trim30b       |         | 1.965040939 | 2.134441599 | 1.077123525 | 0.416292639 | 1.373453794 | 0.800383777 | 0.776583522 | 0.967154334 | 2.042785033 | 2.352922722 |
| ENSMUSG000000032014 | -0.076134061 | 5.464840685  | 0.073203788 | 0.786727936 | 0.999071534 | Oaf           | Oaf           | OAF     | 52.63502516 | 60.12010503 | 40.32481198 | 44.33516608 | 37.34486267 | 58.64630219 | 69.76308637 | 38.47892598 | 18.46363395 | 28.3657906  |
| ENSMUSG000000021874 | -0.241887928 | -0.18404242  | 0.073184946 | 0.786754723 | 0.999071534 | 4933413J09Rik | 4933413J09Rik |         | 1.684320805 | 0.237160178 | 1.548365068 | 0           | 0.784830739 | 0.800383777 | 0.258861174 | 1.174401691 | 0.31427462  | 0.784307574 |
| ENSMUSG000000008318 | -0.123346512 | 3.562688091  | 0.073170742 | 0.786774918 | 0.999071534 | Relt          | Relt          | RELT    | 22.87869093 | 11.97658897 | 8.616988204 | 8.117706466 | 12.16487646 | 20.8099782  | 18.8321504  | 7.806317121 | 1.728510412 | 8.365947547 |
| ENSMUSG000000085029 | 0.363578097  | -1.049441197 | 0.073111724 | 0.78685885  | 0.999071534 | Gm13569       | Gm13569       |         | 1.052700503 | 0.355740266 | 0           | 0           | 0.196207685 | 0.218286485 | 0.647152935 | 1.036236786 | 0           | 0           |
| ENSMUSG000000020246 | 0.060907136  | 4.840947462  | 0.073073216 | 0.786913634 | 0.999071534 | Hcfc2         | Hcfc2         | HCFC2   | 25.26481208 | 32.19449411 | 27.06272858 | 29.20986686 | 31.13161932 | 26.8492376  | 31.7104938  | 32.05425791 | 22.78490998 | 26.53573959 |
| ENSMUSG000000038578 | -0.200825869 | 0.626068733  | 0.073060187 | 0.786932173 | 0.999071534 | Susd1         | Susd1         | SUSD1   | 2.456301174 | 2.371601776 | 1.548365068 | 0.416292639 | 1.111843547 | 0.654859454 | 2.200319978 | 2.141556024 | 1.099961171 | 0.065358965 |
| ENSMUSG000000030654 | 0.071486341  | 7.656815509  | 0.073003824 | 0.787012394 | 0.999071534 | Arl6ip1       | Arl6ip1       | ARL6IP1 | 210.3295605 | 166.6643148 | 184.4574037 | 222.0921231 | 236.3648576 | 212.2472252 | 297.3667735 | 162.2746807 | 161.7728608 | 165.9464109 |
| ENSMUSG000000024049 | 0.162488875  | 1.35768032   | 0.072951493 | 0.787086906 | 0.999071534 | Myom1         | Myom1         | MYOM1   | 1.824680872 | 2.253021687 | 2.288887492 | 4.162926393 | 1.24264867  | 1.091432423 | 0.711868228 | 2.279720929 | 3.378452169 | 4.379050622 |

|                     |              |              |             |             |             |               |               |              |             |             |             |             |             |             |             |             |             |             |
|---------------------|--------------|--------------|-------------|-------------|-------------|---------------|---------------|--------------|-------------|-------------|-------------|-------------|-------------|-------------|-------------|-------------|-------------|-------------|
| ENSMUSG00000028687  | 0.124296217  | 2.118414983  | 0.072916737 | 0.78713641  | 0.999071534 | Mutyh         | Mutyh         | MUTYH        | 4.421342113 | 2.371601776 | 7.203263577 | 2.844666369 | 4.120361381 | 5.23887563  | 2.523896446 | 4.144947144 | 2.435628308 | 7.189486096 |
| ENSMUSG00000020910  | -0.084075136 | 3.646615067  | 0.072872654 | 0.787199217 | 0.999071534 | Adprm         | Adprm         | ADPRM        | 10.0357448  | 17.01624274 | 11.30979702 | 14.70900659 | 12.9497072  | 11.05984855 | 16.37296925 | 9.118883716 | 7.621159544 | 14.1828953  |
| ENSMUSG00000030117  | -0.21894136  | 0.177083984  | 0.072847211 | 0.787235476 | 0.999071534 | Gdf3          | Gdf3          | GDF3         | 1.473780704 | 1.48225111  | 0.336601102 | 0.346910533 | 2.027479409 | 1.382481069 | 0.776583522 | 0.483577167 | 1.649941757 | 0.065358965 |
| ENSMUSG00000032480  | -0.063396814 | 5.35672347   | 0.072838965 | 0.787247228 | 0.999071534 | Dhx30         | Dhx30         | DHX30        | 52.35430502 | 43.22244237 | 44.16206454 | 44.12701977 | 32.57047567 | 69.05129128 | 30.35147264 | 32.53783508 | 30.87748145 | 35.42455876 |
| ENSMUSG00000025702  | 0.060031451  | 5.368425062  | 0.07281068  | 0.787287548 | 0.999071534 | 8-Mar         | 8-Mar         | 8-Mar        | 39.44117885 | 55.55477161 | 39.0457278  | 33.09526482 | 42.83867785 | 55.37200492 | 50.34849833 | 40.55139956 | 27.97044121 | 32.2219695  |
| ENSMUSG00000026211  | 0.286785012  | -0.647361091 | 0.072778746 | 0.787333079 | 0.999071534 |               | Obs1          | OBSL1        | 1.19306057  | 0.237160178 | 0.538561763 | 0           | 0.39241537  | 1.309718907 | 1.164875283 | 0.138164905 | 0           | 0.261435858 |
| ENSMUSG00000031150  | -0.091026853 | 3.430746543  | 0.072717276 | 0.787420752 | 0.999071534 | Ccdc120       | Ccdc120       | CCDC120      | 11.64988557 | 9.01208675  | 11.915679   | 11.30928337 | 13.14591488 | 12.80614043 | 5.371369359 | 15.19813953 | 7.306884924 | 9.477049853 |
| ENSMUSG00000060032  | -0.076894871 | 6.471810106  | 0.072716521 | 0.787421829 | 0.999071534 | H2afj         | H2afj         | H2AFJ        | 100.7785282 | 65.75265925 | 103.2018978 | 121.8349791 | 77.76364574 | 62.2116481  | 63.42098761 | 67.00997882 | 102.9249382 | 107.3194197 |
| ENSMUSG00000042105  | -0.060479161 | 4.814994168  | 0.072714451 | 0.787424782 | 0.999071534 | Inpp5f        | Inpp5f        | INPP5F       | 26.38769261 | 29.22999189 | 27.66861056 | 31.49947637 | 33.48611154 | 29.03210245 | 22.32677625 | 27.63298096 | 24.04200846 | 28.82330335 |
| ENSMUSG00000032024  | -0.080559287 | 5.642900608  | 0.072685711 | 0.787465787 | 0.999071534 | Clmp          | Clmp          | CLMP         | 39.30081878 | 76.06912697 | 47.93199688 | 58.14220529 | 43.62350858 | 34.27097808 | 32.29293145 | 84.00426211 | 37.7915231  | 41.17614764 |
| ENSMUSG00000026425  | -0.059427898 | 5.503993727  | 0.072684608 | 0.787467361 | 0.999071534 | Srgap2        | Srgap2        | SRGAP2       | 49.26638355 | 45.65333419 | 49.81696305 | 42.32308499 | 53.10688002 | 56.1723887  | 30.28675735 | 47.25239744 | 28.99183373 | 54.3132995  |
| ENSMUSG00000028807  | -0.128203146 | 1.560674864  | 0.072640009 | 0.787531011 | 0.999071534 | Zbtb8a        | Zbtb8a        | ZBTB8A       | 3.579181711 | 2.193731643 | 3.971893    | 2.358991623 | 3.204725518 | 3.34705943  | 3.106334087 | 1.174401691 | 1.885647722 | 3.660102012 |
| ENSMUSG00000031885  | 0.065420916  | 7.521940606  | 0.07262108  | 0.787558033 | 0.999071534 | Cbfb          | Cbfb          | CBFB         | 151.6590525 | 172.5933193 | 213.6743794 | 187.8173624 | 204.8408229 | 239.3147492 | 179.1966476 | 199.5101225 | 139.8522061 | 158.4954889 |
| ENSMUSG00000074064  | -0.079964924 | 3.643492706  | 0.072614091 | 0.78756801  | 0.999071534 | Mlycd         | Mlycd         | RP11-50SK9.4 | 14.66762701 | 12.1544591  | 10.29999371 | 16.37417715 | 12.23027902 | 17.3901566  | 12.36062105 | 8.08264693  | 9.663944577 | 11.50317775 |
| ENSMUSG00000020392  | 0.06940613   | 5.830355323  | 0.072613948 | 0.787568215 | 0.999071534 | Cdkn2aipnl    | Cdkn2aipnl    | CDKN2AIPNL   | 76.84713673 | 52.23452912 | 51.23068768 | 53.63236836 | 54.153321   | 71.23415613 | 92.21929321 | 31.98517546 | 42.97705434 | 46.07806998 |
| ENSMUSG00000022000  | -0.078161088 | 5.561057041  | 0.072586196 | 0.787607841 | 0.999071534 | Zc3h13        | Zc3h13        | ZC3H13       | 30.94939479 | 41.20658086 | 71.69603466 | 54.67309996 | 51.34101085 | 54.06228601 | 19.99702569 | 47.87413951 | 44.70556475 | 53.20219711 |
| ENSMUSG00000020235  | -0.070387784 | 5.656160792  | 0.072564834 | 0.787638347 | 0.999071534 | Fzr1          | Fzr1          | FZR1         | 68.2149926  | 48.97357668 | 46.11435093 | 46.83292192 | 58.20827982 | 86.00487492 | 65.88016876 | 30.53444396 | 24.6705577  | 40.52255799 |
| ENSMUSG00000024360  | 0.080768792  | 7.17878359   | 0.072499942 | 0.787731048 | 0.999071534 | Etf1          | Etf1          | ETF1         | 192.433652  | 193.2262547 | 101.0476507 | 123.7776781 | 122.4335953 | 240.0423709 | 217.4433861 | 94.36662997 | 93.18242495 | 97.7770109  |
| ENSMUSG00000027784  | -0.065255391 | 4.777035261  | 0.072495113 | 0.787737948 | 0.999071534 | Ppm1l         | Ppm1l         | PPM1L        | 28.21237348 | 33.73603527 | 22.28299293 | 23.03485937 | 38.19509597 | 28.7410538  | 20.90303979 | 28.80738265 | 24.74912636 | 24.70568858 |
| ENSMUSG00000090090  | 0.251399288  | 0.15652809   | 0.07249067  | 0.787744297 | 0.999071534 | Mup-ps16      | Mup-ps16      |              | 0.771980369 | 0.118580089 | 1.817645949 | 1.526406344 | 0.39241537  | 0           | 0.970729402 | 2.625133191 | 0.942823861 | 0.392153787 |
| ENSMUSG00000062526  | 0.151211762  | 2.216834494  | 0.072490258 | 0.787744886 | 0.999071534 | Mppe1         | Mppe1         | MPPE1        | 6.316203019 | 5.336103997 | 1.211763966 | 5.134275885 | 4.185763942 | 11.27813504 | 7.830550511 | 1.4507315   | 1.649941757 | 2.483640651 |
| ENSMUSG00000032470  | -0.064440498 | 5.38811859   | 0.0724885   | 0.787747398 | 0.999071534 | Mras          | Mras          | MRAS         | 40.49387935 | 64.68543845 | 43.28690168 | 30.18121635 | 43.88511883 | 50.64246442 | 30.41618794 | 50.43019025 | 30.72034414 | 36.2742253  |
| ENSMUSG00000040840  | -0.300837909 | -0.447892578 | 0.072481626 | 0.787757222 | 0.999071534 | 4930579G18Rik | 4930579G18Rik |              | 1.19306057  | 0.770770577 | 0           | 0.485674746 | 0.981038424 | 1.164194584 | 0.323576467 | 1.243484143 | 0           | 0           |
| ENSMUSG00000049659  | -0.053715646 | 5.7010495    | 0.072438081 | 0.78781946  | 0.999071534 | Aftph         | Aftph         | AFTPH        | 52.14376492 | 60.17939507 | 51.83656966 | 56.82394526 | 53.04147745 | 61.62955081 | 52.41938772 | 48.97945875 | 42.66277972 | 41.17614764 |
| ENSMUSG00000031788  | 0.056677586  | 5.756610591  | 0.072382501 | 0.787898931 | 0.999071534 | Kifc3         | Kifc3         | KIFC3        | 52.77538522 | 50.21866761 | 63.2136869  | 42.73937763 | 66.44900258 | 82.94886414 | 45.17127485 | 48.77221139 | 40.30572007 | 53.92114572 |
| ENSMUSG000000078377 | 0.216635561  | 2.158308019  | 0.072308221 | 0.788005191 | 0.999071534 | Gm4294        | Gm4294        |              | 10.10592483 | 0           | 0.807842644 | 2.289609516 | 7.913709953 | 4.438491853 | 10.74273872 | 3.661369977 | 1.571373102 | 2.548999616 |
| ENSMUSG00000067288  | 0.086503682  | 8.117769753  | 0.072269671 | 0.78806036  | 0.999071534 | Rps28         | Rps28         | RPS28        | 237.9103137 | 189.1945317 | 364.4716729 | 363.978531  | 231.6558732 | 187.7263767 | 212.5250238 | 298.228947  | 329.4383708 | 304.1806208 |
| ENSMUSG00000023845  | -0.104490657 | 4.115594024  | 0.072260015 | 0.788074181 | 0.999071534 | Lnpep         | Lnpep         | LNPEP        | 18.38716879 | 38.30136869 | 8.145746661 | 11.17051915 | 17.2008737  | 21.10102684 | 26.92156209 | 15.33630443 | 9.428238612 | 8.954178137 |
| ENSMUSG00000031490  | -0.072994538 | 7.163546071  | 0.07220516  | 0.788152718 | 0.999071534 | Elf4ebp1      | Elf4ebp1      | EIF4EBP1     | 132.9911636 | 169.2730768 | 138.1410921 | 151.3917565 | 170.5698806 | 108.561145  | 126.9714058 | 207.0401098 | 79.82575358 | 149.7373877 |
| ENSMUSG00000060121  | -0.086467455 | 3.842181426  | 0.07218059  | 0.788187907 | 0.999071534 | Gemin2        | Gemin2        | GEMIN2       | 20.07148959 | 13.63671021 | 13.39672385 | 15.12529923 | 13.7999405  | 18.55435119 | 21.67962332 | 6.908245239 | 7.935434165 | 13.20251083 |
| ENSMUSG00000046532  | -0.227021888 | 0.266416576  | 0.072163457 | 0.788212446 | 0.999071534 | Ar            | Ar            | AR           | 2.245761073 | 0.5336104   | 0.134640441 | 1.942698983 | 1.177246109 | 0.654859454 | 0.388291761 | 0.138164905 | 2.121353688 | 1.176461361 |
| ENSMUSG00000026618  | 0.063110994  | 5.056502539  | 0.072155929 | 0.78822323  | 0.999071534 | Iars2         | Iars2         | IARS2        | 40.77459949 | 33.97319545 | 28.34181276 | 28.44666369 | 37.41026523 | 46.56778337 | 45.6242819  | 25.9750021  | 19.79930108 | 29.67296898 |
| ENSMUSG00000027087  | -0.066230525 | 7.472545965  | 0.072100712 | 0.788302347 | 0.999071534 | Itgav         | Itgav         | ITGAV        | 154.887334  | 209.0566966 | 181.6972747 | 176.8549896 | 220.6682428 | 182.4875011 | 167.9361866 | 197.3685665 | 149.9875626 | 135.2930565 |
| ENSMUSG00000040746  | -0.089064035 | 4.015761126  | 0.072087713 | 0.788320977 | 0.999071534 | Rnf167        | Rnf167        | RNF167       | 15.08870721 | 21.58157616 | 17.23397641 | 12.28063286 | 20.01318385 | 12.22404314 | 7.24811287  | 23.211704   | 12.17814154 | 19.1501766  |
| ENSMUSG00000029458  | 0.057221116  | 5.57860377   | 0.071879073 | 0.788620246 | 0.999071534 | Brap          | Brap          | BRAP         | 45.54684177 | 57.33347294 | 46.11435093 | 34.69105327 | 59.97414898 | 52.02494549 | 40.38234313 | 48.42679913 | 42.19136779 | 50.84927438 |
| ENSMUSG00000025469  | -0.102876616 | 3.066279823  | 0.071852168 | 0.788658872 | 0.999071534 | Msx3          | Msx3          |              | 9.825204696 | 4.861783641 | 10.03071283 | 7.978942253 | 11.70705853 | 5.675448599 | 8.9307105   | 4.835771668 | 9.349669957 | 8.496665386 |
| ENSMUSG00000073867  | -0.128213383 | 6.623559533  | 0.071710327 | 0.788862631 | 0.999071534 | AA474408      | AA474408      |              | 83.23351978 | 60.23868512 | 73.78296149 | 234.0258454 | 71.15798702 | 35.65345915 | 24.91538799 | 117.3710866 | 132.0739092 | 116.4043158 |
| ENSMUSG00000027580  | -0.089966554 | 4.197383439  | 0.071656491 | 0.788940025 | 0.999071534 | Hel2          | Hel2          | HEL22        | 15.93086761 | 27.45129056 | 21.67711095 | 13.25188235 | 19.55536592 | 26.33990247 | 10.48387754 | 28.46197039 | 7.149747614 | 15.42471562 |
| ENSMUSG00000055675  | -0.157338264 | 3.080183318  | 0.071637997 | 0.78896662  | 0.999071534 | Kbtbd11       | Kbtbd11       | KBTBD11      | 21.40491023 | 6.46261484  | 6.126140051 | 4.301690606 | 7.78290483  | 14.47967014 | 15.20809397 | 3.868617334 | 0.471411931 | 6.666614379 |

|                    |              |              |             |             |             |               |               |          |  |  |             |             |             |             |             |             |             |             |             |             |
|--------------------|--------------|--------------|-------------|-------------|-------------|---------------|---------------|----------|--|--|-------------|-------------|-------------|-------------|-------------|-------------|-------------|-------------|-------------|-------------|
| ENSMUSG00000056031 | 0.101092673  | 2.298621998  | 0.071621741 | 0.788989999 | 0.999071534 | 9330154J02Rik | 9330154J02Rik |          |  |  | 4.070441945 | 5.039653775 | 4.308494102 | 4.856747458 | 5.690022859 | 5.020589145 | 4.918362304 | 5.388431287 | 4.399844685 | 4.052255799 |
| ENSMUSG00000025868 | 0.071180035  | 5.858377038  | 0.071613676 | 0.789001599 | 0.999071534 | Higd2a        | Higd2a        | HIGD2B   |  |  | 43.5116208  | 47.49132557 | 65.70453505 | 65.98238333 | 69.45752041 | 34.05269159 | 55.46100651 | 71.63850313 | 48.00544826 | 71.17591235 |
| ENSMUSG00000025083 | 0.125864808  | 2.713198216  | 0.071537591 | 0.789111065 | 0.999071534 | Afap1l2       | Afap1l2       | AFAP1L2  |  |  | 5.193322482 | 5.573264174 | 6.058819831 | 5.203657991 | 10.00659192 | 7.348978314 | 1.48845175  | 4.283112048 | 8.17114013  | 10.52279329 |
| ENSMUSG00000028700 | 0.054849835  | 5.318107863  | 0.071490827 | 0.789178378 | 0.999071534 | Pomgnt1       | Pomgnt1       | POMGNT1  |  |  | 37.89721811 | 43.22244237 | 39.65160978 | 42.53123131 | 38.84912159 | 44.31215637 | 44.13583015 | 33.29774205 | 32.52742321 | 41.82973728 |
| ENSMUSG00000020166 | 0.058177932  | 6.135101392  | 0.071438356 | 0.789253933 | 0.999071534 | Cnot2         | Cnot2         | CNOT2    |  |  | 65.12707113 | 71.97811391 | 71.8306751  | 61.68069272 | 86.98540692 | 72.90768585 | 55.07271475 | 87.73471454 | 56.49086302 | 72.22165578 |
| ENSMUSG00000036606 | -0.06664563  | 7.854848929  | 0.071430341 | 0.789265478 | 0.999071534 | Pknb2         | Pknb2         | PLXNB2   |  |  | 253.6306412 | 305.5808889 | 216.4345084 | 201.0693448 | 256.0510286 | 319.6441756 | 194.5988875 | 224.5179703 | 156.9016042 | 216.2728135 |
| ENSMUSG00000040213 | 0.110679418  | 1.968955972  | 0.071343755 | 0.789390229 | 0.999071534 | Ccbl2         | Ccbl2         | KYAT3    |  |  | 4.35116208  | 2.668051998 | 4.173853661 | 3.885397967 | 3.793348573 | 3.638108076 | 3.559341141 | 3.17779281  | 3.69272679  | 4.705845444 |
| ENSMUSG00000015016 | -0.09340889  | 3.008983799  | 0.071319847 | 0.78942469  | 0.999071534 | Acsf3         | Acsf3         | ACSF3    |  |  | 7.439083555 | 7.233385418 | 9.357510628 | 9.574730704 | 8.698540692 | 13.97033501 | 7.701119924 | 5.457513739 | 5.028393926 | 6.209101628 |
| ENSMUSG00000098180 | -0.174838981 | 1.559600688  | 0.07131665  | 0.789429299 | 0.999071534 | Gm5430        | Gm5430        |          |  |  | 1.473780704 | 4.150303108 | 4.847055865 | 1.040731598 | 4.054958819 | 0.9459081   | 1.941458804 | 5.319348834 | 0.31427462  | 4.182973728 |
| ENSMUSG00000007589 | 0.093978439  | 4.114408235  | 0.071287876 | 0.789470782 | 0.999071534 | Tinf2         | Tinf2         | TINF2    |  |  | 26.45787265 | 21.46299608 | 13.59868451 | 11.37866547 | 13.99614818 | 24.73913492 | 30.28675735 | 13.88557293 | 5.971217787 | 14.11753633 |
| ENSMUSG00000007029 | 0.064614948  | 6.452517902  | 0.071260855 | 0.789509746 | 0.999071534 | Vars          | Vars          | VARS     |  |  | 112.5687738 | 71.08876324 | 101.9228136 | 71.94924449 | 87.50862742 | 156.7296959 | 72.80470516 | 64.38484563 | 71.81175076 | 78.10396258 |
| ENSMUSG00000028737 | -0.102358273 | 2.638685615  | 0.071216817 | 0.789573266 | 0.999071534 | Aldh4a1       | Aldh4a1       | ALDH4A1  |  |  | 7.158363421 | 8.300606217 | 5.183656966 | 7.562649614 | 4.447374189 | 9.168032352 | 6.66575228  | 5.319348834 | 2.671334273 | 5.555511983 |
| ENSMUSG00000022387 | -0.060428568 | 5.851323991  | 0.07114842  | 0.789671962 | 0.999071534 | Brd1          | Brd1          | BRD1     |  |  | 58.31960787 | 61.78022627 | 64.02152955 | 52.10596202 | 69.71913066 | 87.96945328 | 33.91081378 | 59.89448623 | 38.81291562 | 58.16947841 |
| ENSMUSG00000039648 | -0.136120145 | 1.45838192   | 0.071147956 | 0.789672632 | 0.999071534 | Ccbl1         | Ccbl1         | KYAT1    |  |  | 3.087921476 | 3.853852886 | 1.615685288 | 3.260959008 | 2.354492217 | 2.037340523 | 1.812028217 | 1.4507315   | 1.885647722 | 4.771204409 |
| ENSMUSG00000038127 | -0.062364653 | 7.086820711  | 0.071119097 | 0.789714291 | 0.999071534 | Ccdc50        | Ccdc50        | CCDC50   |  |  | 140.6407872 | 173.1269297 | 125.6195312 | 141.6782616 | 139.1766511 | 134.3917123 | 155.7049961 | 140.790038  | 98.21081887 | 113.0710086 |
| ENSMUSG00000011114 | -0.073203945 | 6.494154944  | 0.071110456 | 0.789726767 | 0.999071534 | Tbrg1         | Tbrg1         | TBRG1    |  |  | 118.9551569 | 116.5049373 | 71.22479312 | 76.80599195 | 97.77682959 | 111.4716315 | 135.6432551 | 89.59994075 | 42.97705434 | 54.44401743 |
| ENSMUSG00000075588 | -0.24747036  | 0.059560807  | 0.071109567 | 0.78972805  | 0.999071534 | Hoxb2         | Hoxb2         | HOXB2    |  |  | 0.771980369 | 0.592900444 | 2.827449254 | 0.069382107 | 0.850233301 | 1.018670261 | 1.747312924 | 1.105319238 | 0           | 0.261435858 |
| ENSMUSG00000019297 | 0.064965041  | 5.221890887  | 0.071040656 | 0.789827569 | 0.999071534 | Nop9          | Nop9          | NOP9     |  |  | 43.5116208  | 34.32893571 | 39.85357044 | 29.27924896 | 42.44626248 | 58.13696706 | 43.55339251 | 25.35326003 | 34.49163959 | 24.83640651 |
| ENSMUSG00000029787 | -0.079870948 | 4.573528816  | 0.070933771 | 0.789982031 | 0.999071534 | Avl9          | Avl9          | AVL9     |  |  | 18.38716879 | 39.90219989 | 22.21567271 | 20.81463196 | 25.24538878 | 22.99284304 | 25.43311034 | 34.40306129 | 11.62816095 | 17.71227938 |
| ENSMUSG00000045896 | 0.081434054  | 4.600871579  | 0.070896065 | 0.790036551 | 0.999071534 | Paip2b        | Paip2b        | PAIP2B   |  |  | 32.70389563 | 28.22206114 | 18.37842015 | 19.63513615 | 23.34871449 | 39.94642668 | 38.37616903 | 19.20492177 | 12.88525944 | 13.92145944 |
| ENSMUSG00000035211 | 0.29354268   | -0.410278555 | 0.070886531 | 0.790050338 | 0.999071534 | Xrra1         | Xrra1         | XRRA1    |  |  | 0.210540101 | 0.118580089 | 0.673202203 | 1.387642131 | 0.523220493 | 0           | 0           | 0.690824524 | 1.571373102 | 0.784307574 |
| ENSMUSG00000059518 | 0.061594427  | 5.686339973  | 0.070860904 | 0.790087404 | 0.999071534 | Znhit1        | Znhit1        | ZNHIT1   |  |  | 47.58206274 | 42.51096184 | 53.78885605 | 57.1708558  | 59.32012337 | 37.69079967 | 51.83695008 | 49.80844818 | 49.3411154  | 59.4766577  |
| ENSMUSG00000030668 | -0.063944368 | 6.831678311  | 0.070843357 | 0.790112788 | 0.999071534 | Stk11         | Stk11         | STK11    |  |  | 115.4461552 | 99.54798456 | 138.8142943 | 103.1711924 | 147.9405943 | 121.5128097 | 71.83397576 | 122.3450232 | 95.3827249  | 124.3127505 |
| ENSMUSG00000026179 | 0.058892771  | 4.878969644  | 0.070822592 | 0.790142832 | 0.999071534 | Pnkd          | Pnkd          | PNKD     |  |  | 31.44065503 | 25.13897883 | 28.27449254 | 29.20986686 | 34.99037045 | 28.81381596 | 32.68122321 | 26.66582662 | 24.74912636 | 30.78407228 |
| ENSMUSG00000030366 | -0.055840505 | 5.950623209  | 0.070767845 | 0.790222062 | 0.999071534 | Dgcr2         | Dgcr2         | DGCR2    |  |  | 68.35535267 | 75.12048626 | 62.5404847  | 54.048661   | 67.43004101 | 93.57213972 | 60.83237587 | 48.97945875 | 42.26993644 | 53.92114572 |
| ENSMUSG00000063564 | 0.196181061  | 1.212885906  | 0.070690408 | 0.790334188 | 0.999071534 | Col23a1       | Col23a1       | COL23A1  |  |  | 2.737021308 | 2.01586151  | 4.375814322 | 0.138764213 | 1.373453794 | 6.985167506 | 2.78275762  | 0.483577167 | 1.335667137 | 0.653589645 |
| ENSMUSG00000055150 | 0.170411383  | 0.444069723  | 0.070606744 | 0.790455402 | 0.999071534 | Zfp78         | Zfp78         | ZNF471   |  |  | 1.894860906 | 0.948640711 | 0.403921322 | 1.318260024 | 1.438856355 | 0.800383777 | 1.229590576 | 1.174401691 | 0.628549241 | 2.418281687 |
| ENSMUSG00000027447 | -0.082432366 | 9.576151355  | 0.070423633 | 0.790720967 | 0.999071534 | Cst3          | Cst3          | CST3     |  |  | 686.360728  | 771.3634777 | 808.6504867 | 912.4440832 | 885.4198789 | 428.3508449 | 582.9553637 | 1152.364388 | 582.8222835 | 752.0202456 |
| ENSMUSG00000083044 | -0.18787544  | 1.745814751  | 0.070413497 | 0.790735678 | 0.999071534 | Gm12416       | Gm12416       |          |  |  | 2.105401006 | 3.023792265 | 5.183656966 | 2.705902155 | 4.774386997 | 0.9459081   | 2.588611739 | 4.835771668 | 0           | 6.209101628 |
| ENSMUSG00000040850 | -0.07097381  | 5.881307934  | 0.070320305 | 0.790870987 | 0.999071534 | Psme4         | Psme4         | PSME4    |  |  | 72.70651475 | 82.17600155 | 46.45095204 | 50.57955567 | 62.19783608 | 106.4510423 | 71.51039929 | 36.82094713 | 29.62038297 | 45.94735205 |
| ENSMUSG00000024404 | -0.064001047 | 7.070585807  | 0.070279499 | 0.790930263 | 0.999071534 | Riok3         | Riok3         | RIOK3    |  |  | 175.3799038 | 167.7908257 | 104.2117011 | 130.1608319 | 136.6913537 | 159.4946581 | 162.4353866 | 112.6734799 | 94.43952343 | 112.2213421 |
| ENSMUSG00000026698 | -0.063600899 | 4.494792028  | 0.07026715  | 0.790948207 | 0.999071534 | Pigc          | Pigc          | PIGC     |  |  | 23.019051   | 28.45922132 | 21.40783007 | 21.99412778 | 24.13354523 | 21.24655116 | 28.02172208 | 18.37593234 | 17.20653547 | 20.84950968 |
| ENSMUSG00000055299 | -0.070483342 | 4.685336823  | 0.070235655 | 0.790993975 | 0.999071534 | Ltn1          | Ltn1          | LTN1     |  |  | 28.07201342 | 37.05627775 | 16.49345398 | 24.97755836 | 29.88897065 | 40.091951   | 27.11570797 | 23.41895136 | 15.08518178 | 18.62730488 |
| ENSMUSG00000037270 | 0.061540957  | 5.327354191  | 0.070206607 | 0.791036198 | 0.999071534 | 4932438A13Rik | 4932438A13Rik | KIAA1109 |  |  | 32.2126354  | 50.3372477  | 37.69932339 | 38.02139439 | 45.1277675  | 36.16279428 | 31.38691734 | 42.96928539 | 33.86309035 | 51.17606921 |
| ENSMUSG00000061390 | -0.327919063 | -0.339448799 | 0.07013894  | 0.791134591 | 0.999071534 | Gm7866        | Gm7866        |          |  |  | 0           | 2.193731643 | 0.201960661 | 0           | 1.373453794 | 0.582097292 | 1.876743511 | 0.207247357 | 0.15713731  | 0           |
| ENSMUSG00000030002 | -0.055880723 | 6.279130542  | 0.070105721 | 0.791182913 | 0.999071534 | Dusp11        | Dusp11        | DUSP11   |  |  | 84.28622028 | 81.22736084 | 79.03393868 | 82.70347101 | 82.86504554 | 84.54963169 | 69.82780166 | 90.08351792 | 46.51264382 | 79.80329566 |
| ENSMUSG00000006134 | -0.171136464 | 4.140394607  | 0.070075769 | 0.791226493 | 0.999071534 | Crkl          | Crkl          | CRKL     |  |  | 24.35247164 | 35.98905696 | 8.280387102 | 7.909560147 | 20.79801459 | 42.20205368 | 22.06791508 | 14.16190274 | 0.15713731  | 8.823460208 |
| ENSMUSG00000028719 | 0.062952272  | 7.010173682  | 0.070059189 | 0.79125062  | 0.999071534 | Cmpk1         | Cmpk1         | CMPK1    |  |  | 126.3240604 | 110.872383  | 141.3051425 | 147.3675943 | 125.9653336 | 131.3357015 | 172.7251183 | 117.7855813 | 92.63244436 | 123.2016481 |
| ENSMUSG00000031732 | -0.085725041 | 3.43723441   | 0.069993738 | 0.791345898 | 0.999071534 | Phlpp2        | Phlpp2        | PHLPP2   |  |  | 14.80798708 | 7.944865951 | 9.492151068 | 12.6969255  | 12.23027902 | 16.00767553 | 8.995425794 | 11.81309936 | 6.049786443 | 8.627383315 |

|                     |              |              |             |             |             |               |               |          |             |             |             |             |             |             |             |             |             |             |
|---------------------|--------------|--------------|-------------|-------------|-------------|---------------|---------------|----------|-------------|-------------|-------------|-------------|-------------|-------------|-------------|-------------|-------------|-------------|
| ENSMUSG00000026525  | 0.130114402  | 1.29032143   | 0.069991981 | 0.791348457 | 0.999071534 | Opn3          | Opn3          | OPN3     | 3.228281543 | 2.01586151  | 1.346404407 | 3.191576901 | 1.63506404  | 2.764962138 | 2.847472913 | 1.796143762 | 1.964216377 | 2.352922722 |
| ENSMUSG000000096974 | -0.215420912 | 0.008097579  | 0.069872876 | 0.791521962 | 0.999071534 | Gm26881       | Gm26881       |          | 0.491260235 | 0.830060622 | 1.211763966 | 1.595788451 | 0.654025616 | 0.582097292 | 1.100159989 | 1.72706131  | 0           | 0.522871716 |
| ENSMUSG000000035840 | -0.135850226 | 3.564934996  | 0.069855373 | 0.791547473 | 0.999071534 | Lysmd3        | Lysmd3        | LYSMD3   | 16.56248792 | 22.53021687 | 4.173853661 | 6.175007483 | 14.84638148 | 15.4983404  | 24.8506727  | 8.566224097 | 2.278490998 | 5.097999231 |
| ENSMUSG000000043535 | -0.059803982 | 5.566161354  | 0.069770326 | 0.791671479 | 0.999071534 | Setx          | Setx          | SETX     | 38.94991862 | 53.0052997  | 51.23068768 | 57.1708558  | 49.0519212  | 71.59796694 | 34.55796672 | 35.64654544 | 42.03423048 | 42.74476279 |
| ENSMUSG000000020715 | -0.072762417 | 4.853577076  | 0.069742133 | 0.791712605 | 0.999071534 | Ern1          | Ern1          | ERN1     | 32.07227533 | 50.69298797 | 19.38822346 | 20.05142879 | 31.98185262 | 37.10870238 | 29.89846559 | 30.94893867 | 16.49941757 | 23.72530412 |
| ENSMUSG00000016664  | -0.060285267 | 6.397717887  | 0.069727686 | 0.791733682 | 0.999071534 | Pacsin2       | Pacsin2       | PACsin2  | 92.84818438 | 101.1488158 | 95.46007244 | 66.12114754 | 92.28301441 | 140.3582096 | 81.73541566 | 62.93411413 | 60.02645249 | 64.90145175 |
| ENSMUSG000000040782 | 0.054184435  | 5.830425636  | 0.069709568 | 0.791760119 | 0.999071534 | Rfwd2         | Rfwd2         | RFWD2    | 54.95096626 | 63.38105747 | 49.00912041 | 54.53433575 | 67.62624869 | 60.82916703 | 52.80767948 | 54.02247777 | 56.01945108 | 53.13683814 |
| ENSMUSG000000033350 | -0.061166837 | 5.700363796  | 0.069676609 | 0.791808977 | 0.999071534 | Chst2         | Chst2         | CHST2    | 47.09080251 | 49.68505721 | 75.8025681  | 44.82084083 | 57.81586445 | 73.99911827 | 34.16967496 | 42.41662577 | 44.54842744 | 52.87540228 |
| ENSMUSG000000027985 | -0.10773095  | 3.488236686  | 0.069669632 | 0.791818404 | 0.999071534 | Lef1          | Lef1          | LEF1     | 5.895122818 | 8.893506661 | 16.76273487 | 15.74973819 | 11.90326621 | 13.02442691 | 3.365195261 | 13.0565835  | 8.485414751 | 13.79074151 |
| ENSMUSG000000029385 | -0.093706083 | 6.37229728   | 0.069657625 | 0.791835931 | 0.999071534 | Ccng2         | Ccng2         | CCNG2    | 66.3201317  | 113.6590151 | 80.64962397 | 84.43802367 | 98.36545264 | 29.97801055 | 50.34849833 | 155.1591881 | 62.06923753 | 76.07783468 |
| ENSMUSG000000040209 | 0.094173546  | 4.31725559   | 0.06961384  | 0.791899861 | 0.999071534 | Zfp704        | Zfp704        | ZNF704   | 14.24654681 | 16.00831199 | 28.54377342 | 19.01069719 | 21.4520402  | 21.90141062 | 5.565515239 | 26.32041436 | 20.34928167 | 23.33315033 |
| ENSMUSG000000051396 | 0.070613371  | 5.468648611  | 0.069590602 | 0.791933797 | 0.999071534 | Hspa14        | Hspa14        |          | 63.65329042 | 41.62161117 | 38.64180648 | 38.02139439 | 42.44626248 | 69.92443722 | 67.10975934 | 28.18564058 | 24.12057712 | 36.86245598 |
| ENSMUSG000000041650 | 0.095273428  | 3.832913148  | 0.069567487 | 0.791967562 | 0.999071534 | Pcca          | Pcca          | PCCA     | 15.15888725 | 18.37991377 | 15.01240914 | 8.187088573 | 14.58477124 | 21.68312413 | 25.69197151 | 11.88218181 | 6.049786443 | 7.777716776 |
| ENSMUSG000000084345 | 0.171013369  | 0.597883234  | 0.069510868 | 0.792050292 | 0.999071534 | Rpl17-ps4     | Rpl17-ps4     |          | 0.561440268 | 0.830060622 | 0.942483085 | 3.052812688 | 1.24264867  | 0.654859454 | 1.48845175  | 1.796143762 | 1.257098482 | 1.699333077 |
| ENSMUSG000000013419 | 0.073325983  | 4.237410531  | 0.06950264  | 0.792062317 | 0.999071534 | Zfp651        | Zfp651        | ZBTB47   | 14.59744698 | 18.61707394 | 17.83985839 | 21.43907092 | 21.9752607  | 21.39207549 | 12.10175988 | 17.33969555 | 21.5278115  | 19.08481764 |
| ENSMUSG000000038690 | 0.077903687  | 8.353380043  | 0.069461195 | 0.7921229   | 0.999071534 | Atp5j2        | Atp5j2        | ATP5J2   | 384.2356836 | 222.3376665 | 153.8664738 | 419.1373057 | 301.6366141 | 230.8743385 | 420.519977  | 279.1621901 | 305.2392521 | 354.8991773 |
| ENSMUSG000000002731 | 0.060677747  | 5.274595588  | 0.069439978 | 0.792153922 | 0.999071534 | Prkra         | Prkra         | PRKRA    | 46.4591822  | 41.32516095 | 36.48755943 | 29.97307003 | 42.64247016 | 30.41458352 | 49.18362304 | 40.13690484 | 31.34889338 | 37.05853287 |
| ENSMUSG000000025323 | 0.100728293  | 2.897002822  | 0.06939001  | 0.792227003 | 0.999071534 | Sp4           | Sp4           | SP4      | 7.439083555 | 7.470545595 | 8.616988204 | 6.105625376 | 7.063476652 | 5.893735083 | 4.012348196 | 9.187966168 | 9.113963991 | 7.189486096 |
| ENSMUSG000000082419 | 0.199123802  | 0.281203065  | 0.069307633 | 0.792347545 | 0.999071534 | Gm11425       | Gm11425       |          | 0.421080201 | 0.889350666 | 2.423527932 | 0.901967385 | 0.588623054 | 0.363810808 | 0.906014109 | 2.556050739 | 1.099961171 | 0.457512752 |
| ENSMUSG000000074146 | 0.103816729  | 3.176941172  | 0.06921977  | 0.792476199 | 0.999071534 | 4930579C12Rik | 4930579C12Rik |          | 11.2989854  | 6.04758453  | 6.126140051 | 13.52951078 | 7.259684337 | 5.311637791 | 13.52549634 | 8.289894287 | 8.563983406 | 7.843075741 |
| ENSMUSG000000031902 | -0.05624704  | 5.822715059  | 0.069219302 | 0.792476884 | 0.999071534 | Nfatc3        | Nfatc3        | NFATC3   | 48.56458321 | 58.10424352 | 58.77055236 | 61.4725464  | 71.68120751 | 78.07379931 | 40.38234313 | 49.25578856 | 48.55542885 | 53.65970986 |
| ENSMUSG000000092607 | -0.070484857 | 4.412194575  | 0.069103049 | 0.792647244 | 0.999071534 | Scnm1         | Scnm1         | SCNM1    | 20.63292986 | 16.18618212 | 24.70652087 | 26.98963945 | 23.54492217 | 18.11777822 | 18.18499747 | 19.75758138 | 14.37806388 | 29.01938024 |
| ENSMUSG000000025154 | 0.075940434  | 4.533435236  | 0.069078961 | 0.792682561 | 0.999071534 | Arhgap19      | Arhgap19      | ARHGAP19 | 28.98435385 | 21.16654585 | 24.1679591  | 22.89609516 | 19.16295055 | 44.8214915  | 28.7335903  | 13.67832557 | 14.45663254 | 17.51620249 |
| ENSMUSG000000040483 | 0.087433107  | 5.397680631  | 0.069067047 | 0.792700033 | 0.999071534 | Xaf1          | Xaf1          | XAF1     | 32.98461576 | 34.80325607 | 53.45225495 | 48.08179984 | 41.26901637 | 26.33990247 | 16.17882337 | 58.30558982 | 46.98405575 | 53.72506882 |
| ENSMUSG000000062270 | -0.07364753  | 8.465095845  | 0.068982132 | 0.792824599 | 0.999071534 | Morf4l1       | Morf4l1       | MORF4L1  | 382.6917229 | 508.649291  | 299.3056996 | 336.2950704 | 357.2287914 | 414.2349855 | 501.2846633 | 317.779281  | 189.4290274 | 272.4161641 |
| ENSMUSG000000039835 | -0.083547019 | 5.603272231  | 0.068975479 | 0.792834363 | 0.999071534 | Nhs1          | Nhs1          | NHSL1    | 27.72111325 | 53.71678023 | 55.40454134 | 44.26578398 | 78.41767135 | 46.42225905 | 21.29133155 | 78.68491328 | 34.41307093 | 45.2937624  |
| ENSMUSG000000078348 | -0.06931785  | 6.498932288  | 0.068943888 | 0.792880729 | 0.999071534 | Sf3b5         | Sf3b5         | SF3B5    | 126.3240604 | 56.38483223 | 94.78687024 | 111.7051915 | 89.60150939 | 93.86318836 | 123.6062105 | 57.40751794 | 64.42629718 | 89.14962758 |
| ENSMUSG000000003421 | -0.057082062 | 4.980392507  | 0.06884348  | 0.793028173 | 0.999071534 | Nosip         | Nosip         | NOSIP    | 36.77433758 | 27.86632087 | 36.01631788 | 31.08318373 | 34.79416277 | 39.43709155 | 23.36222095 | 29.22187736 | 24.43485174 | 33.59450776 |
| ENSMUSG000000028639 | 0.068318491  | 9.195231742  | 0.068822822 | 0.793058524 | 0.999071534 | Ybx1          | Ybx1          | YBK1     | 520.7358489 | 652.0126183 | 623.9911223 | 475.1980478 | 707.5249113 | 595.7765785 | 741.7666939 | 647.3025789 | 419.4780496 | 499.1464119 |
| ENSMUSG000000086528 | 0.151356339  | 1.117421991  | 0.068724132 | 0.79320358  | 0.999071534 | Gm15731       | Gm15731       |          | 1.333420637 | 0.889350666 | 3.164050356 | 2.775284262 | 1.765869163 | 2.40115133  | 0.841298815 | 3.108710358 | 0.942823861 | 3.202589261 |
| ENSMUSG000000037373 | -0.061096001 | 7.228028518  | 0.068713476 | 0.79321925  | 0.999071534 | Ctbp1         | Ctbp1         | CTBP1    | 171.0989218 | 157.8300982 | 147.4312825 | 147.5757406 | 171.2239063 | 218.5047711 | 147.0331468 | 115.9203551 | 101.2749964 | 141.9596709 |
| ENSMUSG000000080727 | -0.211455109 | 0.189168759  | 0.068618469 | 0.793359009 | 0.999071534 | C920021L13Rik | C920021L13Rik |          | 1.684320805 | 1.067220799 | 0.201960661 | 1.665170557 | 0.981038424 | 0.436572969 | 0.064715293 | 1.243484143 | 0.864255206 | 1.764692042 |
| ENSMUSG000000055334 | 0.096862661  | 2.928128393  | 0.068607524 | 0.793375117 | 0.999071534 | Snupn         | Snupn         | SNUPN    | 8.702324159 | 8.656346483 | 8.415027543 | 6.591300122 | 5.166802366 | 9.09527019  | 11.84289871 | 7.460904859 | 4.478413341 | 5.032640267 |
| ENSMUSG000000050106 | 0.137562336  | 1.429770983  | 0.068539321 | 0.793475519 | 0.999071534 | Tmc8          | Tmc8          | TMC8     | 2.526481208 | 3.201662398 | 3.298690797 | 0.971349492 | 2.746907587 | 1.673529715 | 2.135604685 | 2.694215643 | 1.414235792 | 4.967281302 |
| ENSMUSG000000041649 | 0.220856466  | -0.016692628 | 0.06849625  | 0.793538953 | 0.999071534 | Klf8          | Klf8          | KLF8     | 0.98252047  | 0.355740266 | 0.538561763 | 1.942698983 | 0.196207685 | 1.964578361 | 1.617882337 | 0.138164905 | 0.628549241 | 0.326794823 |
| ENSMUSG000000035851 | 0.05774606   | 6.142365788  | 0.068440901 | 0.7936205   | 0.999071534 | Ythdc1        | Ythdc1        | YTHDC1   | 59.93374864 | 81.64239115 | 72.50387731 | 65.42732648 | 79.46411234 | 82.80333981 | 49.31305363 | 84.34967437 | 54.60521529 | 77.45037294 |
| ENSMUSG000000005836 | 0.131622574  | 1.629027606  | 0.068412401 | 0.793662503 | 0.999071534 | Gata6         | Gata6         | GATA6    | 1.333420637 | 2.075151554 | 2.625488593 | 5.481186417 | 2.943115272 | 3.710870238 | 2.265035272 | 4.144947144 | 2.514196963 | 2.352922722 |
| ENSMUSG000000003617 | -0.0906214   | 6.891539099  | 0.068359796 | 0.793740057 | 0.999071534 | Cp            | Cp            | CP       | 68.56589277 | 167.6129555 | 104.2790213 | 124.402117  | 170.4390755 | 81.27533442 | 58.04961825 | 198.2666384 | 70.24037766 | 141.1753633 |
| ENSMUSG000000064246 | -0.159360152 | 1.519253216  | 0.068359109 | 0.79374107  | 0.999071534 | Chi3l1        | Chi1          | CHI3L1   | 7.860163757 | 1.897281421 | 2.558168373 | 0.763203172 | 2.092881971 | 4.875064822 | 3.235764674 | 2.832380548 | 0.628549241 | 1.568615148 |

|                     |              |              |             |             |             |               |           |           |             |             |             |             |             |             |             |             |             |             |
|---------------------|--------------|--------------|-------------|-------------|-------------|---------------|-----------|-----------|-------------|-------------|-------------|-------------|-------------|-------------|-------------|-------------|-------------|-------------|
| ENSMUSG00000075470  | -0.129900555 | 4.388848502  | 0.068345595 | 0.793760998 | 0.999071534 | Alg10b        | Alg10b    | ALG10     | 27.51057315 | 46.54268486 | 10.77123525 | 8.117706466 | 21.32123508 | 51.07903739 | 29.57488912 | 11.05319238 | 5.264099892 | 7.581639883 |
| ENSMUSG000000031016 | -0.164922845 | 2.772532839  | 0.068338264 | 0.793771809 | 0.999071534 | Wee1          | Wee1      | WEE1      | 11.9306057  | 13.16238986 | 2.625488593 | 4.440454819 | 4.839789558 | 19.06368632 | 8.607134033 | 4.214029596 | 0.785686551 | 1.176461361 |
| ENSMUSG000000025139 | -0.059507935 | 5.480609294  | 0.068329294 | 0.79378504  | 0.999071534 | Tollp         | Tollp     | TOLLIP    | 43.86252096 | 61.72093623 | 40.25749176 | 43.29443449 | 46.95903923 | 53.6984752  | 38.37616903 | 53.46981815 | 35.59160076 | 30.1958416  |
| ENSMUSG000000042275 | 0.070865204  | 4.067415896  | 0.068284302 | 0.79385141  | 0.999071534 | Pelo          | Pelo      | PELO      | 15.36942735 | 14.05174052 | 21.40783007 | 16.30479504 | 17.00466601 | 19.35473496 | 14.49622574 | 12.98750105 | 12.88525944 | 23.07171447 |
| ENSMUSG00000020883  | -0.086067321 | 4.779573216  | 0.068261299 | 0.793885353 | 0.999071534 | FbxI20        | FbxI20    | FBXL20    | 24.84373187 | 38.83497909 | 28.34181276 | 19.98204669 | 34.85956533 | 25.10294573 | 15.53167044 | 49.32487101 | 11.39245499 | 27.64684199 |
| ENSMUSG000000041324 | -0.090690016 | 6.508816307  | 0.068219228 | 0.793947447 | 0.999071534 | Inhba         | Inhba     | INHBA     | 71.02219394 | 165.8935443 | 128.6489411 | 62.58266011 | 59.84334386 | 57.04553463 | 48.53647011 | 132.9146384 | 89.01828623 | 84.24770525 |
| ENSMUSG000000024294 | -0.056283968 | 6.385583809  | 0.06817534  | 0.794012246 | 0.999071534 | Mib1          | Mib1      | MIB1      | 69.47823321 | 86.02985443 | 97.27771839 | 89.64168166 | 98.57786801 | 105.5778964 | 66.4626064  | 77.30326423 | 75.19020293 | 71.69878406 |
| ENSMUSG000000076433 | -0.196828106 | 0.106356038  | 0.068100289 | 0.794123107 | 0.999071534 | BC100451      | BC100451  | CEP295NL  | 1.122880537 | 2.134441599 | 0.403921322 | 0.555056852 | 1.046440986 | 0.654859454 | 0.906014109 | 1.312566595 | 1.099961171 | 0.130717929 |
| ENSMUSG000000064145 | -0.054350801 | 5.689349743  | 0.068086021 | 0.794144189 | 0.999071534 | Arih2         | Arih2     | ARIH2     | 57.40726744 | 65.39691898 | 52.10585054 | 48.08179984 | 49.57514169 | 58.64630219 | 42.38851723 | 60.79255811 | 39.04862158 | 43.79050622 |
| ENSMUSG000000028648 | 0.074908671  | 5.459270429  | 0.068072561 | 0.794164081 | 0.999071534 | Ndufs5        | Ndufs5    | NDUF55    | 40.63423942 | 25.79116932 | 58.9051928  | 55.36692103 | 39.63395233 | 33.4705943  | 41.28835724 | 31.6397632  | 51.22676312 | 53.59435089 |
| ENSMUSG000000048970 | 0.061215325  | 5.735821304  | 0.068068084 | 0.794170698 | 0.999071534 | C1galt1c1     | C1galt1c1 | C1GALT1C1 | 48.35404311 | 46.77984504 | 52.57709209 | 62.72142432 | 58.79690287 | 42.27481584 | 70.34552401 | 54.09156022 | 49.02684078 | 42.22189107 |
| ENSMUSG000000021786 | 0.08436859   | 3.388437813  | 0.067914023 | 0.79439853  | 0.999071534 | Oxsm          | Oxsm      | OXSM      | 8.632144126 | 11.73942879 | 9.155549966 | 10.40731598 | 12.16487646 | 9.313556675 | 13.00777399 | 13.47107822 | 6.206923753 | 9.477049853 |
| ENSMUSG000000017561 | 0.061365695  | 4.994059967  | 0.067900015 | 0.794419258 | 0.999071534 | Crlf3         | Crlf3     | CRLF3     | 41.75711996 | 26.50264985 | 33.12154841 | 23.93682676 | 36.75623962 | 39.65537803 | 34.23439025 | 38.61709089 | 19.09218319 | 27.32004716 |
| ENSMUSG000000066592 | 0.17244337   | 0.963394352  | 0.067860547 | 0.794477675 | 0.999071534 | Gm7589        | Gm7589    |           | 1.614140771 | 2.845922132 | 2.288887492 | 1.595788451 | 0.457817931 | 1.528005392 | 1.941458804 | 1.036236786 | 0.31427462  | 4.64048648  |
| ENSMUSG000000055782 | 0.199440688  | 0.869569823  | 0.067804624 | 0.79456048  | 0.999071534 | Abcd2         | Abcd2     | ABCD2     | 3.228281543 | 1.48225111  | 1.144443746 | 1.457024238 | 0.981038424 | 1.746291877 | 1.747312924 | 1.036236786 | 3.771295445 | 0           |
| ENSMUSG000000020495 | -0.080328796 | 4.256717466  | 0.067731697 | 0.794668515 | 0.999071534 | Smg8          | Smg8      | SMG8      | 24.42265167 | 28.16277109 | 12.85816209 | 15.40282765 | 20.99422227 | 30.34182135 | 24.91538799 | 15.19813953 | 8.721120716 | 13.52930565 |
| ENSMUSG000000036955 | 0.057678225  | 5.7503103    | 0.067714912 | 0.794693391 | 0.999071534 | 2510003E04Rik | Kif1bp    | KIF1BP    | 47.37152264 | 49.98150744 | 50.22088437 | 52.45287255 | 73.44707667 | 47.29540499 | 46.78915719 | 61.62154754 | 49.02684078 | 56.07799155 |
| ENSMUSG000000027962 | -0.068742218 | 7.826423638  | 0.067696071 | 0.794721316 | 0.999071534 | Vcam1         | Vcam1     | VCAM1     | 209.0663199 | 241.8440911 | 231.7835186 | 298.4124403 | 218.3791532 | 316.4426405 | 197.1874992 | 145.2113149 | 198.3072855 | 224.2466072 |
| ENSMUSG000000046822 | -0.071655741 | 3.767800941  | 0.067599827 | 0.794864031 | 0.999071534 | Slc39a3       | Slc39a3   | SLC39A3   | 13.75528657 | 16.4233423  | 14.20456649 | 12.76630761 | 14.71557636 | 19.64578361 | 12.55476693 | 12.98750105 | 7.778296855 | 12.22212636 |
| ENSMUSG000000035202 | -0.119957904 | 9.924756208  | 0.067483475 | 0.795036706 | 0.999071534 | Lars2         | Lars2     | LARS2     | 952.9044954 | 567.7614652 | 846.3498101 | 2174.712748 | 608.4400305 | 462.4035365 | 320.5995639 | 964.7364477 | 1470.019537 | 988.6196971 |
| ENSMUSG000000057685 | -0.185643901 | 0.178403397  | 0.067467678 | 0.795060163 | 0.999071534 | Gm8526        | Gm8526    |           | 0.98252047  | 0.296450222 | 1.548365068 | 0.624438959 | 2.092881971 | 0.509335131 | 1.359021163 | 0.690824524 | 0.471411931 | 1.437897219 |
| ENSMUSG000000026836 | -0.053303193 | 5.635176842  | 0.067433224 | 0.795111332 | 0.999071534 | Acvr1         | Acvr1     | ACVR1     | 48.77512331 | 59.46791454 | 50.22088437 | 45.72280822 | 58.40448751 | 51.806659   | 45.81842778 | 55.33504437 | 31.663168   | 51.82965885 |
| ENSMUSG000000023031 | -0.128399722 | 2.557562056  | 0.067431466 | 0.795113943 | 0.999071534 | Cela1         | Cela1     | CELA1     | 8.772504193 | 3.735272798 | 5.722218729 | 8.880909638 | 3.858751134 | 11.20537287 | 8.477703446 | 1.381649048 | 3.221314859 | 3.660102012 |
| ENSMUSG000000055065 | -0.067415309 | 8.238191554  | 0.067427178 | 0.795120313 | 0.999071534 | Ddx17         | Ddx17     | DDX17     | 294.7561409 | 371.6299983 | 303.9507948 | 305.0731225 | 328.5824695 | 294.5412298 | 228.5744166 | 337.3986975 | 244.427086  | 310.3897224 |
| ENSMUSG000000016552 | -0.128295728 | 1.501107609  | 0.067415041 | 0.795138343 | 0.999071534 | Foxred2       | Foxred2   | FOXRED2   | 2.596661241 | 4.624623464 | 1.413724627 | 2.428373729 | 3.597140888 | 3.492583753 | 1.617882337 | 1.588896405 | 2.749902928 | 3.006512367 |
| ENSMUSG000000093345 | 0.288662054  | 0.617798537  | 0.067333163 | 0.795260016 | 0.999071534 | Gm26112       | Gm27956   |           | 1.333420637 | 0.059290044 | 2.692808814 | 2.497755836 | 0           | 0           | 0.258861174 | 1.243484143 | 4.32127603  | 0.784307574 |
| ENSMUSG000000030805 | -0.056164759 | 6.46245943   | 0.067324969 | 0.795272198 | 0.999071534 | Stx4a         | Stx4a     | STX4      | 90.67260334 | 101.9788764 | 89.13197173 | 97.41247759 | 86.06977106 | 89.35193435 | 72.22226752 | 74.05638897 | 74.32594772 | 105.4240097 |
| ENSMUSG000000031963 | -0.118732829 | 1.659402353  | 0.067293835 | 0.795318488 | 0.999071534 | Bmper         | Bmper     | BMPER     | 2.38612114  | 3.49811262  | 3.635291898 | 3.746633754 | 3.008517833 | 5.675448599 | 2.265035272 | 2.210638477 | 2.199922343 | 2.156845829 |
| ENSMUSG000000058715 | -0.057090744 | 6.196053963  | 0.067277028 | 0.795343481 | 0.999071534 | Fcer1g        | Fcer1g    | FCER1G    | 95.16412548 | 75.8319668  | 79.97642177 | 61.12563587 | 76.71720475 | 85.20449114 | 92.73701556 | 65.42108242 | 42.42707375 | 66.33934897 |
| ENSMUSG000000034748 | -0.085192693 | 3.774783699  | 0.06726891  | 0.795355556 | 0.999071534 | Sirt6         | Sirt6     | SIRT6     | 12.7727661  | 14.2889007  | 12.72352164 | 12.14186865 | 20.79801459 | 17.09910796 | 12.36062105 | 16.99428329 | 4.32127603  | 14.64040805 |
| ENSMUSG000000034951 | -0.088655273 | 3.742246099  | 0.067267839 | 0.795357148 | 0.999071534 | Cog7          | Cog7      | COG7      | 19.15914916 | 22.05589652 | 7.068623136 | 9.089055958 | 14.06155074 | 22.1196971  | 11.38989165 | 9.464295978 | 9.506807267 | 11.37245982 |
| ENSMUSG000000019432 | 0.061669426  | 7.457875194  | 0.067235817 | 0.79540478  | 0.999071534 | Ddx39b        | Ddx39b    | DDX39B    | 195.5215734 | 162.6918819 | 208.0194809 | 141.8864079 | 186.8551185 | 236.6953114 | 166.9007419 | 161.4456912 | 125.6312795 | 189.2795612 |
| ENSMUSG000000006589 | -0.066564044 | 7.906989385  | 0.067216124 | 0.79543408  | 0.999071534 | Aprt          | Aprt      | APRT      | 280.1586939 | 209.3531468 | 250.0946186 | 260.0441353 | 273.9713305 | 257.2870031 | 305.2620393 | 177.6109851 | 163.9727832 | 237.3837591 |
| ENSMUSG000000053931 | -0.064526372 | 8.982791649  | 0.067215206 | 0.795435446 | 0.999071534 | Cnn3          | Cnn3      | CNN3      | 423.3259623 | 540.4287548 | 619.615308  | 498.4410534 | 602.6846051 | 571.1829679 | 462.9732096 | 505.752634  | 372.4154252 | 488.7543366 |
| ENSMUSG000000021214 | -0.325111789 | -0.770111095 | 0.067175822 | 0.795494055 | 0.999071534 | Akr1c18       | Akr1c18   | AKR1C3    | 0.98252047  | 1.067220799 | 0.471241542 | 0           | 0.065402562 | 0.800383777 | 1.164875283 | 0.069082452 | 0           | 0           |
| ENSMUSG000000087066 | 0.260354539  | -0.528973548 | 0.067164548 | 0.795510837 | 0.999071534 | Gm15518       | Gm15518   |           | 1.052700503 | 0.118580089 | 0.471241542 | 0.971349492 | 0.065402562 | 0.145524323 | 0.064715293 | 1.243484143 | 1.021392516 | 0.326794823 |
| ENSMUSG000000024073 | 0.061351723  | 6.263190075  | 0.067052238 | 0.795678087 | 0.999071534 | Birc6         | Birc6     | BIRC6     | 58.67050804 | 73.99397542 | 89.93981438 | 70.83913079 | 96.33797323 | 93.49937756 | 48.6011854  | 74.81629594 | 76.05445813 | 83.52875664 |
| ENSMUSG000000027610 | -0.058325523 | 5.066556377  | 0.067028339 | 0.795713697 | 0.999071534 | Gss           | Gss       | GSS       | 33.6864161  | 35.33686647 | 39.31500868 | 27.19778577 | 41.85763942 | 35.72622131 | 44.26526074 | 27.97839322 | 22.70634132 | 28.49650852 |
| ENSMUSG000000025147 | -0.070841234 | 4.033241961  | 0.067012492 | 0.795737312 | 0.999071534 | Mob2          | Mob2      | MOB2      | 18.52752886 | 18.79494408 | 15.41633046 | 15.40282765 | 18.44352237 | 22.04693494 | 19.28515746 | 15.40538688 | 7.464022234 | 14.50969012 |

|                    |              |              |             |             |             |            |            |          |             |             |             |             |              |             |             |             |             |             |
|--------------------|--------------|--------------|-------------|-------------|-------------|------------|------------|----------|-------------|-------------|-------------|-------------|--------------|-------------|-------------|-------------|-------------|-------------|
| ENSMUSG00000043572 | 0.123420832  | 1.979357125  | 0.066930957 | 0.795858864 | 0.999071534 | Pars2      | Pars2      | PARS2    | 4.421342113 | 4.98036373  | 3.500651458 | 0.971349492 | 5.297607489  | 5.166113468 | 2.847472913 | 3.523205072 | 4.478413341 | 3.071871332 |
| ENSMUSG00000038780 | -0.070182579 | 5.583545642  | 0.066861488 | 0.795962492 | 0.999071534 | Smurf1     | Smurf1     | SMURF1   | 44.7748614  | 69.72509222 | 47.19147446 | 30.11183424 | 64.29071805  | 55.00819411 | 27.95700678 | 67.00997882 | 29.2275397  | 48.2349158  |
| ENSMUSG00000029364 | -0.055507263 | 6.586937289  | 0.066842369 | 0.795991022 | 0.999071534 | Wsb2       | Wsb2       | WSB2     | 111.4458933 | 125.457734  | 80.51498353 | 87.07454372 | 104.97111114 | 116.5649828 | 94.67847436 | 88.35645661 | 63.71917928 | 97.45021608 |
| ENSMUSG00000023048 | -0.071494382 | 7.191185846  | 0.066839175 | 0.795995789 | 0.999071534 | Prr13      | Prr13      |          | 135.2369246 | 139.5687645 | 163.9247365 | 157.2892355 | 180.1186546  | 101.357691  | 96.74936375 | 186.0390443 | 113.0602497 | 179.1489217 |
| ENSMUSG00000025352 | -0.055774371 | 5.282645329  | 0.066814547 | 0.796032546 | 0.999071534 | Gdf11      | Gdf11      | GDF11    | 37.96739815 | 45.59404415 | 34.80455392 | 39.06212599 | 48.07088277  | 39.1460429  | 37.85844669 | 46.1470782  | 27.89187256 | 32.74484122 |
| ENSMUSG00000055737 | -0.0722356   | 4.838604262  | 0.066797974 | 0.796057286 | 0.999071534 | Ghr        | Ghr        | GHR      | 25.05427197 | 39.72432975 | 21.60979073 | 31.63824059 | 33.42070898  | 18.99092416 | 21.8090539  | 39.79149258 | 22.54920401 | 28.43114956 |
| ENSMUSG00000021771 | 0.064304337  | 8.34055043   | 0.066786943 | 0.796073755 | 0.999071534 | Vdac2      | Vdac2      | VDAC2    | 343.6716243 | 300.3040749 | 353.1618759 | 292.0292865 | 357.9482196  | 338.4895754 | 387.3857468 | 332.9083381 | 245.5270472 | 297.7100833 |
| ENSMUSG00000034998 | -0.061176179 | 4.869356523  | 0.066750486 | 0.796128194 | 0.999071534 | Foxn2      | Foxn2      | FOXN2    | 26.59823271 | 35.75189678 | 39.51696934 | 20.67586775 | 32.24346287  | 37.54527535 | 25.23896446 | 26.52766172 | 25.22053829 | 23.79066308 |
| ENSMUSG00000024446 | 0.082958137  | 3.893302712  | 0.066748653 | 0.796130931 | 0.999071534 | Rpp21      | Rpp21      | RPP21    | 11.64988557 | 9.071376794 | 14.40652715 | 22.96547727 | 15.43500454  | 12.51509178 | 15.07866338 | 18.7213446  | 12.80669078 | 13.0717929  |
| ENSMUSG00000056050 | -0.058386108 | 6.208626877  | 0.066740241 | 0.796143494 | 0.999071534 | Mia3       | Mia3       | MIA3     | 57.5476275  | 65.51549907 | 84.15027543 | 95.19225019 | 86.72379668  | 78.07379931 | 61.93253586 | 71.98391539 | 55.31233319 | 82.6790901  |
| ENSMUSG00000051236 | 0.057478861  | 6.45851988   | 0.066737024 | 0.796148299 | 0.999071534 | Msrb3      | Msrb3      | MSRB3    | 67.7939124  | 99.13295425 | 86.3718427  | 98.24506287 | 94.04888358  | 102.8856964 | 88.98352853 | 89.87627056 | 81.86853861 | 67.64652826 |
| ENSMUSG00000012428 | 0.212211105  | 2.514058522  | 0.066721105 | 0.796172077 | 0.999071534 | Steap4     | Steap4     | STEAP4   | 11.5095255  | 6.521904885 | 3.433331237 | 2.150845303 | 3.466335765  | 10.47775126 | 18.76743511 | 0.138164905 | 0.31427462  | 1.30717929  |
| ENSMUSG00000092500 | -0.176010014 | 1.443263407  | 0.066697234 | 0.79620774  | 0.999071534 | Gm20400    | Gm20400    |          | 4.000261912 | 7.707705773 | 0.336601102 | 0.624438959 | 1.700466601  | 3.056010784 | 3.235764674 | 2.970545453 | 0.785686551 | 1.960768935 |
| ENSMUSG00000016495 | 0.058864749  | 5.016724437  | 0.066633049 | 0.796303661 | 0.999071534 | Plgrkt     | Plgrkt     | PLGRKT   | 37.68667801 | 25.96903945 | 31.4385429  | 34.9685817  | 33.74772178  | 33.03402133 | 40.90006548 | 24.59335305 | 24.82769501 | 35.81671255 |
| ENSMUSG00000000628 | -0.097755114 | 6.439758685  | 0.066625611 | 0.79631478  | 0.999071534 | Hk2        | Hk2        | HK2      | 72.70651475 | 147.0986002 | 98.48948236 | 74.44700033 | 73.0546613   | 45.98568608 | 25.8214021  | 143.691501  | 71.49747614 | 105.4893687 |
| ENSMUSG00000045404 | -0.163943446 | 1.958578576  | 0.06662492  | 0.796315814 | 0.999071534 | Kcnk13     | Kcnk13     | KCNK13   | 6.667103186 | 5.573264174 | 0.336601102 | 2.983430582 | 5.166802366  | 6.621356699 | 6.730390522 | 2.210638477 | 0.785686551 | 1.764692042 |
| ENSMUSG00000027164 | -0.06950716  | 4.309541078  | 0.066574128 | 0.796391759 | 0.999071534 | Traf6      | Traf6      | TRAF6    | 23.15941107 | 29.05212176 | 20.5326672  | 14.57024238 | 17.85489932  | 26.70371328 | 17.60255983 | 22.17546722 | 10.13535651 | 18.49658695 |
| ENSMUSG00000048058 | 0.12371506   | 2.077964571  | 0.066566055 | 0.796403833 | 0.999071534 | Ldlrad3    | Ldlrad3    | LDLRAD3  | 6.175842952 | 3.913142931 | 4.241173882 | 3.399723221 | 2.616102464  | 8.003837767 | 3.882917609 | 2.417885834 | 1.178529826 | 6.274460592 |
| ENSMUSG00000091764 | 0.125683925  | 1.362144137  | 0.066484437 | 0.796525946 | 0.999071534 | Zfp964     | Zfp964     |          | 2.456301174 | 1.897281421 | 2.962089695 | 1.526406344 | 3.335530641  | 2.910486461 | 1.423736457 | 2.556050739 | 2.907040239 | 2.352927222 |
| ENSMUSG00000036241 | 0.080112197  | 7.769043677  | 0.066482051 | 0.796529517 | 0.999071534 | Ube2r2     | Ube2r2     | UBE2R2   | 161.2737171 | 176.4471722 | 263.962584  | 277.5978083 | 213.8009739  | 169.8996472 | 131.6309069 | 234.396761  | 261.4764842 | 249.4098086 |
| ENSMUSG00000016554 | -0.067407647 | 7.607722603  | 0.066477835 | 0.796535826 | 0.999071534 | Eif3d      | Eif3d      | EIF3D    | 236.2961729 | 246.1722644 | 191.4587067 | 167.6965515 | 197.1887232  | 260.6340626 | 257.2432916 | 140.030131  | 115.1030797 | 168.7568464 |
| ENSMUSG00000085897 | 0.182590631  | 0.11435123   | 0.066455244 | 0.796569642 | 0.999071534 | Gm11604    | Gm11604    |          | 1.333420637 | 0.355740266 | 1.144443746 | 1.179495811 | 0.588623054  | 0.800383777 | 1.100159989 | 2.003391119 | 0.392843275 | 0.588230681 |
| ENSMUSG00000026197 | 0.07322569   | 3.971565395  | 0.066431748 | 0.796604818 | 0.999071534 | Zfand2b    | Zfand2b    | ZFAND2B  | 21.40491023 | 14.22961066 | 11.37711724 | 13.11321814 | 18.96674286  | 16.37148634 | 19.47930334 | 16.92520084 | 10.05678785 | 14.70576701 |
| ENSMUSG00000021453 | 0.062512685  | 5.802792186  | 0.066332277 | 0.796753811 | 0.999071534 | Gadd45g    | Gadd45g    | GADD45G  | 50.74016425 | 56.91844263 | 64.62741153 | 57.93405897 | 51.99503647  | 48.09578877 | 36.11113376 | 53.2625708  | 57.82653015 | 73.98634782 |
| ENSMUSG00000035151 | 0.074061045  | 4.204717602  | 0.06629942  | 0.796803052 | 0.999071534 | Elmod2     | Elmod2     | ELMOD2   | 15.01852718 | 28.5778014  | 20.26338632 | 13.39074656 | 15.56580966  | 23.64770249 | 24.65652682 | 12.64208879 | 14.45663254 | 16.33974113 |
| ENSMUSG00000030744 | -0.081585633 | 10.63815359  | 0.066269431 | 0.796848006 | 0.999071534 | Rps3       | Rps3       | RPS3     | 2682.842322 | 1784.333886 | 1123.372517 | 1565.954145 | 1373.650001  | 1403.654858 | 2590.423767 | 1231.532879 | 1017.306946 | 1264.303809 |
| ENSMUSG00000023175 | -0.085810997 | 10.00974057  | 0.066266888 | 0.796851819 | 0.999071534 | Bsg        | Bsg        | BSG      | 845.318504  | 1528.497345 | 949.6863484 | 901.898003  | 1302.165001  | 522.9416549 | 797.4218463 | 1607.410502 | 766.6729364 | 1018.031231 |
| ENSMUSG00000024845 | -0.052627605 | 6.302663522  | 0.066246321 | 0.796882656 | 0.999071534 | Tmem134    | Tmem134    |          | 80.49649847 | 71.38521347 | 89.06465151 | 85.96443001 | 89.14369146  | 80.183902   | 76.4287616  | 73.78005916 | 64.19059121 | 78.10396258 |
| ENSMUSG00000042606 | 0.07851586   | 3.892305772  | 0.066245751 | 0.796883511 | 0.999071534 | Hirip3     | Hirip3     | HIRIP3   | 18.24680872 | 9.842147372 | 14.74312825 | 12.48877918 | 19.29375567  | 27.94067002 | 11.97232929 | 11.39860464 | 11.5495923  | 12.54892118 |
| ENSMUSG00000068959 | -0.249402717 | -0.011923883 | 0.066205401 | 0.796944026 | 0.999071534 | Zfp619     | Zfp619     |          | 0.912340436 | 1.48225111  | 0.201960661 | 0.901967385 | 1.308051232  | 1.528005392 | 0.647152935 | 1.796143762 | 0           | 0           |
| ENSMUSG00000045555 | -0.133941292 | 1.513073463  | 0.066177304 | 0.796986175 | 0.999071534 | Mettl24    | Mettl24    | METTTL24 | 4.912602348 | 2.134441599 | 2.01960661  | 3.052812688 | 2.681505025  | 3.565345915 | 4.012348196 | 0.690824524 | 1.885647722 | 2.61435858  |
| ENSMUSG00000037211 | -0.147213376 | 1.802940821  | 0.066175631 | 0.796988686 | 0.999071534 | Spry1      | Spry1      | SPRY1    | 6.035482885 | 2.312311732 | 6.193460271 | 1.110113705 | 2.812310149  | 7.494502637 | 3.882917609 | 1.174401691 | 2.199922343 | 1.503256184 |
| ENSMUSG00000028063 | -0.067424296 | 9.162403189  | 0.06613583  | 0.797048411 | 0.999071534 | Lmna       | Lmna       | LMNA     | 583.6171589 | 496.1983816 | 763.0746976 | 533.1321067 | 670.1146461  | 790.5608849 | 418.96681   | 479.3631372 | 502.3679807 | 534.2441759 |
| ENSMUSG00000015013 | -0.06424646  | 5.033600763  | 0.066094904 | 0.797109844 | 0.999071534 | Trappc2l   | Trappc2l   | TRAPPC2L | 43.79234093 | 34.86254611 | 30.83266092 | 30.52812688 | 33.5515141   | 28.15895651 | 45.6242819  | 27.35665115 | 17.04939816 | 37.05853287 |
| ENSMUSG00000029291 | 0.064865803  | 4.611334869  | 0.066082402 | 0.797128614 | 0.999071534 | Rufy3      | Rufy3      | RUFY3    | 20.56274983 | 20.33648523 | 32.24638554 | 26.29581838 | 23.47951961  | 24.15703763 | 20.38531745 | 25.62958984 | 24.35628308 | 23.92138101 |
| ENSMUSG00000053641 | -0.08571075  | 3.614103839  | 0.065886918 | 0.797422361 | 0.999071534 | Dennd4a    | Dennd4a    | DENND4A  | 14.52726694 | 16.12689208 | 18.17645949 | 6.105625376 | 10.20279961  | 18.55435119 | 8.607134033 | 10.29328541 | 8.32827744  | 12.35284429 |
| ENSMUSG00000029782 | 0.069463526  | 4.713411755  | 0.06585693  | 0.797467463 | 0.999071534 | Tmem209    | Tmem209    | TMEM209  | 30.31777449 | 29.28928194 | 25.85096461 | 21.1615425  | 26.09562208  | 45.33082663 | 34.42853613 | 20.1720761  | 11.39245499 | 23.59458619 |
| ENSMUSG00000084758 | -0.205184978 | 0.163619819  | 0.065855078 | 0.797470249 | 0.999071534 | Gm12798    | Gm12798    |          | 1.263240604 | 0.5336104   | 1.95228639  | 0.624438959 | 1.111843547  | 0.582097292 | 0.19414588  | 0.828989429 | 0.15713731  | 2.679717545 |
| ENSMUSG00000083757 | -0.226859864 | 0.354545334  | 0.06582588  | 0.797514175 | 0.999071534 | Rps15a-ps4 | Rps15a-ps4 |          | 2.315941107 | 0.474320355 | 1.817645949 | 1.179495811 | 0.654025616  | 0           | 0.19414588  | 0.621742072 | 1.099961171 | 2.941153403 |

|                     |              |              |             |             |             |               |               |          |             |             |             |             |             |             |             |             |             |             |             |
|---------------------|--------------|--------------|-------------|-------------|-------------|---------------|---------------|----------|-------------|-------------|-------------|-------------|-------------|-------------|-------------|-------------|-------------|-------------|-------------|
| ENSMUSG00000070667  | 0.198343328  | -0.054597733 | 0.06581161  | 0.797535646 | 0.999071534 | RplB1-ps10    | RplB1-ps10    |          |             | 0.912340436 | 0.355740266 | 1.95228639  | 0.485674746 | 0.327012808 | 0.654859454 | 1.100159989 | 1.243484143 | 0.942823861 | 0.261435858 |
| ENSMUSG00000041836  | -0.060550804 | 4.507988534  | 0.065802837 | 0.797548848 | 0.999071534 | Ptpre         | Ptpre         | PTPRE    |             | 22.31725067 | 26.79910007 | 21.87907161 | 24.42250151 | 24.39515548 | 31.72430242 | 21.22661626 | 15.88896405 | 17.12796681 | 22.81027861 |
| ENSMUSG00000024576  | -0.06501214  | 8.201461299  | 0.065766514 | 0.797603518 | 0.999071534 | Csnk1a1       | Csnk1a1       | CSNK1A1  |             | 283.9484157 | 366.4124744 | 315.9337941 | 307.4321141 | 286.7902326 | 307.9294676 | 292.1895501 | 283.8597969 | 256.7623649 | 241.5667328 |
| ENSMUSG00000056643  | 0.2639522    | -0.104709801 | 0.065760732 | 0.79761222  | 0.999071534 | Chst13        | Chst13        | CHST13   |             | 2.105401006 | 0.296450222 | 0.269280881 | 0.069382107 | 1.046440986 | 1.673529715 | 2.200319978 | 0.069082452 |             | 0.522871716 |
| ENSMUSG00000001507  | 0.05925741   | 6.845662599  | 0.065704976 | 0.797696173 | 0.999071534 | Itga3         | Itga3         | ITGA3    |             | 132.7104434 | 136.0113619 | 106.7025492 | 88.9478606  | 122.3027902 | 185.2524632 | 103.1561778 | 117.5092515 | 79.19720434 | 95.81624196 |
| ENSMUSG00000003346  | 0.054151207  | 6.681166838  | 0.065500128 | 0.798004945 | 0.999071534 | Abhd17a       | Abhd17a       | ABHD17A  |             | 106.5332909 | 98.77721398 | 98.01824082 | 97.41247759 | 122.0411799 | 114.5276422 | 113.2517636 | 100.169556  | 88.93971757 | 86.7313459  |
| ENSMUSG00000039914  | -0.074109841 | 3.699299794  | 0.065472833 | 0.798046125 | 0.999071534 | Coq10a        | Coq10a        | COQ10A   |             | 11.15862533 | 13.28096995 | 12.45424076 | 13.66827499 | 17.92030188 | 12.15128097 | 11.97232929 | 14.43823255 | 7.778296855 | 14.37897219 |
| ENSMUSG00000020827  | -0.061303059 | 5.473010173  | 0.065432245 | 0.798107379 | 0.999071534 | Mink1         | Mink1         | MINK1    |             | 56.2843869  | 57.74850325 | 36.28559876 | 31.98515112 | 54.02251588 | 57.77315625 | 29.57488912 | 46.83790272 | 28.91326508 | 49.54209509 |
| ENSMUSG00000048000  | 0.056524037  | 5.427901888  | 0.065368724 | 0.798203284 | 0.999071534 | Gigyf2        | Gigyf2        | GIGYF2   |             | 37.26559781 | 50.69298797 | 38.50716604 | 43.01690606 | 48.92111607 | 52.67980494 | 30.09261147 | 44.00552217 | 40.14858276 | 44.11730104 |
| ENSMUSG00000048997  | -0.089037281 | 3.301381979  | 0.065353658 | 0.798226038 | 0.999071534 | Atxn7l2       | Atxn7l2       | ATXN7L2  |             | 9.614664595 | 7.411255551 | 12.5888812  | 12.90507182 | 9.221761185 | 10.33222694 | 4.853647011 | 10.91502748 | 9.192532646 | 9.803844676 |
| ENSMUSG00000069255  | -0.090918331 | 3.408176139  | 0.065315222 | 0.798284099 | 0.999071534 | Dusp22        | Dusp22        | DUSP22   |             | 11.36916543 | 7.174095373 | 11.915679   | 15.81912029 | 9.41796887  | 10.55051342 | 12.42533635 | 4.973936572 | 9.506807267 | 11.37245982 |
| ENSMUSG00000027282  | 0.065761549  | 7.273157391  | 0.0652526   | 0.798378735 | 0.999071534 | Mtch2         | Mtch2         | MTCH2    |             | 166.8179397 | 135.4184614 | 165.8097027 | 179.4221275 | 133.7482385 | 138.1025826 | 217.8963931 | 132.0165665 | 131.6024973 | 138.038133  |
| ENSMUSG00000031703  | 0.057185471  | 6.420548451  | 0.065116181 | 0.798585064 | 0.999071534 | Itfg1         | Itfg1         | ITFG1    |             | 80.84739864 | 96.22774207 | 72.90779863 | 96.64927442 | 87.7048351  | 90.37060461 | 117.8465494 | 78.27041856 | 63.09063004 | 73.33275817 |
| ENSMUSG00000019505  | -0.069674776 | 8.475696465  | 0.065071124 | 0.798653261 | 0.999071534 | Ubb           | Ubb           |          | 346.2682855 | 387.0454099 | 396.8526989 | 352.8080118 | 409.9432561 | 290.4665488 | 287.983056  | 483.922579  | 227.5348252 | 379.34343   |             |
| ENSMUSG00000029614  | 0.067798737  | 10.56935227  | 0.06506751  | 0.798658732 | 0.999071534 | Rpl6          | Rpl6          | RPL6     |             | 1905.738811 | 1404.166122 | 1383.96909  | 1493.172315 | 1521.721401 | 1294.65714  | 1958.996649 | 1437.882164 | 1185.051025 | 1586.327427 |
| ENSMUSG000000095253 | -0.094803673 | 2.388278475  | 0.065058657 | 0.798672134 | 0.999071534 | Zfp799        | Zfp799        |          | 5.263502516 | 6.581194929 | 5.250977187 | 4.787365352 | 5.493815174 | 6.912405345 | 4.077063489 | 4.62852431  | 4.478413341 | 3.92153787  |             |
| ENSMUSG00000031389  | -0.073064665 | 3.978988591  | 0.065048234 | 0.798687916 | 0.999071534 | Arhgap4       | Arhgap4       | ARHGAP4  |             | 21.9663505  | 16.06760203 | 19.1862628  | 11.23990126 | 15.17339429 | 22.99284304 | 11.77818341 | 11.81309936 | 10.76390575 | 17.90835627 |
| ENSMUSG000000097414 | -0.135485439 | 1.184559351  | 0.065032445 | 0.798711825 | 0.999071534 | B130046B21Rik | B130046B21Rik |          | 3.298461576 | 1.422961066 | 3.164050356 | 2.358991623 | 1.373453794 | 2.473913492 | 0.841298815 | 2.694215643 | 1.807079067 | 2.0261279   |             |
| ENSMUSG00000024579  | 0.08654246   | 3.967894826  | 0.065002813 | 0.798756703 | 0.999071534 | Pcyox1l       | Pcyox1l       | PCYOX1L  |             | 10.8779052  | 6.759065062 | 20.80194809 | 22.89609516 | 16.02362759 | 18.26330254 | 13.20191987 | 13.12566595 | 13.90665195 | 18.69266385 |
| ENSMUSG00000029338  | -0.059433324 | 5.983500844  | 0.064923841 | 0.79887636  | 0.999071534 | Antxr2        | Antxr2        | ANTXR2   |             | 57.96870771 | 82.1167115  | 50.49016526 | 67.30064335 | 76.78260731 | 73.63530746 | 80.18224862 | 63.48677375 | 42.42707375 | 42.15653211 |
| ENSMUSG00000054843  | -0.058043599 | 4.928133541  | 0.064881336 | 0.798940797 | 0.999071534 | Atrnl1        | Atrnl1        | ATRNL1   |             | 26.17715251 | 41.44374104 | 24.43723998 | 33.78908589 | 34.53255252 | 36.52660508 | 26.98627738 | 27.97839322 | 21.84208612 | 31.50302089 |
| ENSMUSG00000056313  | 0.08202778   | 8.43736894   | 0.06487965  | 0.798943354 | 0.999071534 | 1810011O10Rik | 1810011O10Rik | C8orf4   |             | 371.9541778 | 324.6722832 | 333.3697311 | 365.1580268 | 350.884743  | 166.1160148 | 264.620835  | 440.1243042 | 413.3496645 | 359.9971765 |
| ENSMUSG000000080950 | -0.244125562 | 0.528276039  | 0.064847558 | 0.798992018 | 0.999071534 | Gm7278        | Gm7278        |          | 1.965040939 | 4.268883197 | 0           | 0           | 1.177246109 | 1.673529715 | 2.135604685 | 1.036236786 | 0.31427462  | 0.784307574 |             |
| ENSMUSG00000003411  | -0.170689316 | 0.101162534  | 0.064708934 | 0.799202381 | 0.999071534 | Rab3b         | Rab3b         | RAB3B    |             | 1.614140771 | 1.007930755 | 0.538585163 | 0.971349492 | 1.046440986 | 0.582097292 | 1.29430587  | 1.243484143 | 0.628549241 | 0.457512752 |
| ENSMUSG00000026766  | -0.068647583 | 6.018878035  | 0.064706973 | 0.799205358 | 0.999071534 | Mmadhc        | Mmadhc        | MMADHC   |             | 84.77748052 | 61.95809641 | 65.30061373 | 66.88435071 | 65.20635391 | 76.25474528 | 110.6631518 | 38.75525579 | 38.26293503 | 47.05845444 |
| ENSMUSG00000010830  | -0.0832101   | 5.260792393  | 0.064669071 | 0.799262918 | 0.999071534 | Kdelr3        | Kdelr3        | KDEL3    |             | 46.2486421  | 65.45620903 | 32.98690797 | 25.11632257 | 35.57899351 | 35.21688618 | 66.5273217  | 39.72241013 | 13.43524002 | 27.64684199 |
| ENSMUSG00000027884  | 0.058744704  | 5.080282123  | 0.064666272 | 0.799267169 | 0.999071534 | Clcc1         | Clcc1         | CLCC1    |             | 37.75685805 | 33.97319545 | 34.06403149 | 28.09975315 | 38.06429085 | 43.51177259 | 47.75988659 | 25.14601267 | 20.89926226 | 32.02589261 |
| ENSMUSG00000054728  | -0.097870039 | 5.383907723  | 0.064611529 | 0.799350336 | 0.999071534 | Phactr1       | Phactr1       | PHACTR1  |             | 31.15993489 | 31.54230362 | 47.9993171  | 64.87226962 | 45.78179312 | 29.54143758 | 8.865995207 | 49.67028327 | 42.3485051  | 58.10411944 |
| ENSMUSG00000043257  | -0.08978621  | 2.869279152  | 0.064528084 | 0.799477182 | 0.999071534 | Pigv          | Pigv          | PIGV     |             | 5.895122818 | 6.106874574 | 8.482347763 | 8.880909638 | 8.894748377 | 6.403070214 | 5.824376413 | 7.322739954 | 6.049786443 | 7.646998847 |
| ENSMUSG00000079418  | 0.073258075  | 4.707204879  | 0.064515364 | 0.799496525 | 0.999071534 | Atg4a         | Atg4a         | ATG4A    |             | 36.49361744 | 28.39993127 | 21.81175139 | 26.22643628 | 18.57432749 | 27.94067002 | 42.77680899 | 23.14262155 | 20.11357571 | 15.16327977 |
| ENSMUSG000000041481 | -0.104331973 | 2.336688313  | 0.064334308 | 0.79977208  | 0.999071534 | Serpina3g     | Serpina3g     | SERPINA3 |             | 8.140883891 | 6.640484974 | 3.231370576 | 3.399723221 | 5.232204928 | 6.985167506 | 3.041618794 | 4.283112048 | 3.771295445 | 5.163358196 |
| ENSMUSG000000050382 | 0.128095651  | 1.033767582  | 0.064241408 | 0.799913627 | 0.999071534 | Kif7          | Kif7          | KIF7     |             | 1.894860906 | 2.608761954 | 1.683005509 | 1.248877918 | 2.092881971 | 2.764962138 | 1.164875283 | 2.417885834 | 1.414235792 | 2.0261279   |
| ENSMUSG00000025237  | -0.071582597 | 4.234011789  | 0.064173756 | 0.800016773 | 0.999071534 | Parp6         | Parp6         | PARP6    |             | 19.51004932 | 25.07968878 | 14.20456649 | 20.53710354 | 20.01318385 | 13.82481069 | 14.62565633 | 23.90252853 | 15.79229967 | 18.30051006 |
| ENSMUSG000000040414 | 0.072399703  | 3.805848006  | 0.064140023 | 0.800068227 | 0.999071534 | Slc25a28      | Slc25a28      | SLC25A28 |             | 13.75528657 | 14.34819075 | 17.63789773 | 11.44804758 | 13.01510976 | 19.35473496 | 11.97232929 | 10.1551205  | 10.21392516 | 18.0390742  |
| ENSMUSG00000032802  | -0.052367571 | 6.202125367  | 0.064021871 | 0.800248558 | 0.999071534 | Srxn1         | Srxn1         | SRXN1    |             | 92.07620401 | 86.14843452 | 67.25290012 | 65.14979805 | 79.07169697 | 96.04605321 | 76.88176865 | 65.42108242 | 50.59821388 | 65.09752865 |
| ENSMUSG00000051212  | 0.111993318  | 2.667900096  | 0.064018891 | 0.800253108 | 0.999071534 | Gpr183        | Gpr183        | GPR183   |             | 7.088183388 | 7.114805329 | 4.241173882 | 5.134275885 | 7.586697145 | 10.62327558 | 11.58403753 | 3.799534882 | 1.807079067 | 4.967281302 |
| ENSMUSG00000017686  | 0.053159361  | 5.686036497  | 0.06400787  | 0.800269938 | 0.999071534 | Rhot1         | Rhot1         | RHOT1    |             | 59.86356861 | 56.7405725  | 57.49146817 | 38.85397967 | 49.64054425 | 58.86458867 | 63.5504182  |             |             |             |

|                    |              |              |             |             |             |               |               |          |             |             |             |             |             |             |             |             |             |             |
|--------------------|--------------|--------------|-------------|-------------|-------------|---------------|---------------|----------|-------------|-------------|-------------|-------------|-------------|-------------|-------------|-------------|-------------|-------------|
| ENSMUSG00000011256 | -0.073573272 | 5.150989062  | 0.063863993 | 0.800489799 | 0.999071534 | Adam19        | Adam19        | ADAM19   | 34.38821644 | 55.55477161 | 27.803251   | 34.9685817  | 35.97140888 | 73.12597233 | 35.65812671 | 25.90591965 | 18.77790857 | 22.35276586 |
| ENSMUSG00000028678 | -0.083300942 | 4.524088056  | 0.063770345 | 0.800633044 | 0.999071534 | Kif2c         | Kif2c         | KIF2C    | 30.38795452 | 13.34025999 | 29.41893629 | 21.43907092 | 27.86149124 | 46.42225905 | 27.11570797 | 13.60924312 | 11.5495923  | 14.64040805 |
| ENSMUSG00000026207 | 0.064168269  | 5.530156659  | 0.063739806 | 0.800679782 | 0.999071534 | Speg          | Speg          | SPEG     | 40.07279915 | 38.47923882 | 40.86337375 | 54.25680732 | 59.71253874 | 44.53044285 | 31.7104938  | 54.22972513 | 31.03461876 | 66.14327208 |
| ENSMUSG00000040389 | 0.079281735  | 3.546182289  | 0.063729507 | 0.800695546 | 0.999071534 | Wdr47         | Wdr47         | WDR47    | 11.2989854  | 11.91729893 | 12.72352164 | 9.227820171 | 13.27672    | 12.15128097 | 7.959981098 | 14.30006765 | 12.57098482 | 9.411690889 |
| ENSMUSG00000058622 | -0.244549209 | 0.218341581  | 0.063713806 | 0.800719582 | 0.999071534 | Gm5265        | Gm5265        |          | 1.894860906 | 1.48225111  | 0.538561763 | 0           | 1.962076848 | 0           | 1.164875283 | 1.588896405 | 0.235705965 | 1.437897219 |
| ENSMUSG00000058589 | 0.12217266   | 2.478025902  | 0.063708798 | 0.80072725  | 0.999071534 | Anks1b        | Anks1b        | ANKS1B   | 5.403862583 | 1.363671021 | 5.587578288 | 4.440454819 | 10.39900729 | 6.330308052 | 8.412988152 | 2.694215643 | 5.028393926 | 4.967281302 |
| ENSMUSG00000001739 | 0.176722058  | 0.16337368   | 0.063668743 | 0.800788583 | 0.999071534 | Cldn15        | Cldn15        | CLDN15   | 1.263240604 | 0.355740266 | 0.605881983 | 1.110113705 | 1.504258917 | 1.236956746 | 0.388291761 | 0.552659619 | 1.335667137 | 1.503256184 |
| ENSMUSG00000020114 | -0.05872103  | 7.318064444  | 0.06365589  | 0.800808269 | 0.999071534 | Cand1         | Cand1         | CAND1    | 156.5014748 | 200.1631899 | 154.3652652 | 158.6768777 | 175.4750728 | 207.7359711 | 155.1872738 | 148.0436955 | 104.1820367 | 152.2863873 |
| ENSMUSG00000097017 | -0.241018437 | -0.245485713 | 0.063639012 | 0.800834123 | 0.999071534 | Gm26707       | Gm26707       |          | 0.421080201 | 0           | 1.548365068 | 1.734552664 | 0.261610246 | 0.363810808 | 0.19414588  | 0.759906976 | 1.099961171 | 0.588230681 |
| ENSMUSG00000027536 | 0.153101232  | 0.949277622  | 0.063613674 | 0.800872942 | 0.999071534 | Chmp4c        | Chmp4c        | CHMP4C   | 0.912340436 | 1.245090933 | 1.750325729 | 3.885397967 | 0.850233301 | 3.274297269 | 1.941458804 | 0.898071881 | 0.864255206 | 2.548999616 |
| ENSMUSG00000054604 | 0.066188214  | 6.191456074  | 0.063612267 | 0.800875098 | 0.999071534 | Cggbp1        | Cggbp1        | CGGBP1   | 87.65486189 | 100.6152054 | 58.03002993 | 60.3624327  | 64.61773086 | 105.2868477 | 111.6985965 | 55.47320927 | 46.1983692  | 50.84927438 |
| ENSMUSG00000057572 | 0.065794429  | 4.651765921  | 0.063546136 | 0.800976454 | 0.999071534 | Zbtb8os       | Zbtb8os       | ZBTB8OS  | 26.52805268 | 17.96488346 | 25.78364439 | 33.16464693 | 22.62928631 | 25.03018356 | 22.65035272 | 19.27400422 | 26.47763677 | 28.3657906  |
| ENSMUSG00000058569 | 0.062440559  | 7.574664143  | 0.06354357  | 0.800980388 | 0.999071534 | Tmed9         | Tmed9         | TMED9    | 164.0107384 | 161.1503407 | 219.1273172 | 195.380012  | 226.9468887 | 201.6239496 | 202.7530145 | 213.6029428 | 139.9307747 | 184.116203  |
| ENSMUSG00000089719 | 0.128400275  | 1.438033562  | 0.063502008 | 0.801044119 | 0.999071534 | Gm15758       | Gm15758       |          | 2.17558104  | 2.727342043 | 2.760129034 | 3.399723221 | 1.63506404  | 2.110102684 | 1.100159989 | 2.832380548 | 2.985608894 | 3.660102012 |
| ENSMUSG00000083116 | -0.413585053 | -1.228933407 | 0.063500305 | 0.80104673  | 0.999071534 | Gm13410       | Gm13410       |          | 0           | 1.304380977 | 0           | 0.346910533 | 0           | 1.091432423 | 0.258861174 | 0           | 0           | 0           |
| ENSMUSG00000058297 | -0.20979337  | -0.554173225 | 0.063470199 | 0.801092909 | 0.999071534 | Spock2        | Spock2        | SPOCK2   | 0.350900168 | 0.355740266 | 0.336601102 | 0.763203172 | 1.24264867  | 1.164194584 | 0.19414588  | 0.27632981  | 0.628549241 | 0.261435858 |
| ENSMUSG00000097239 | -0.093870119 | 3.172709563  | 0.063371261 | 0.801244749 | 0.999071534 | Gm27029       | Gm27029       | PTGES3L  | 7.579443623 | 6.284744707 | 8.078426441 | 14.43147816 | 10.85682522 | 15.35281608 | 7.506974044 | 4.973936572 | 6.128355098 | 8.954178137 |
| ENSMUSG00000026628 | -0.131654003 | 4.347098318  | 0.063368883 | 0.8012484   | 0.999071534 | Atf3          | Atf3          | ATF3     | 20.84346996 | 51.4044685  | 11.37711724 | 9.158438064 | 18.051107   | 5.093351307 | 8.671849326 | 46.49249046 | 12.88525944 | 16.73189491 |
| ENSMUSG00000022604 | 0.117288051  | 3.52367024   | 0.063341454 | 0.801290519 | 0.999071534 | Cep97         | Cep97         | CEP97    | 5.614402683 | 7.292675462 | 16.35881354 | 18.38625824 | 8.175320199 | 8.876983706 | 4.788931717 | 7.806317121 | 20.66355629 | 11.69925465 |
| ENSMUSG00000069520 | -0.052258907 | 5.692372895  | 0.063154056 | 0.801578535 | 0.999071534 | Tmem19        | Tmem19        | TMEM19   | 52.42448506 | 57.74850325 | 41.40193551 | 57.58714844 | 63.37508219 | 52.31599413 | 55.20214534 | 43.66010991 | 39.83430813 | 53.65970986 |
| ENSMUSG00000028988 | -0.061792991 | 4.86881245   | 0.063093154 | 0.801672236 | 0.999071534 | Ctnnbip1      | Ctnnbip1      | CTNNBIP1 | 36.56379748 | 21.10725581 | 31.84246422 | 37.0500449  | 27.0766605  | 37.76356183 | 30.35147264 | 19.13583931 | 22.9404729  | 28.88866231 |
| ENSMUSG00000020656 | 0.27071787   | -0.682079283 | 0.0630849   | 0.801684939 | 0.999071534 | Grhl1         | Grhl1         | GRHL1    | 0.140360067 | 0.415030311 | 0.673202203 | 1.040731598 | 0           | 1.164194584 | 0.19414588  | 0           | 0.785686551 | 0.522871716 |
| ENSMUSG00000097885 | -0.163576557 | 1.014519033  | 0.063063907 | 0.801717251 | 0.999071534 | 5031434O11Rik | 5031434O11Rik |          | 0.912340436 | 0.830060622 | 3.769932339 | 2.775284262 | 1.962076848 | 0.727621615 | 1.100159989 | 3.868617334 | 0.628549241 | 2.156845829 |
| ENSMUSG00000078517 | -0.063303231 | 5.416155534  | 0.06302856  | 0.801771669 | 0.999071534 | Emc1          | Emc1          | EMC1     | 52.35430502 | 27.56987065 | 46.78755314 | 55.0893926  | 43.10028809 | 54.13504817 | 39.99405137 | 24.86968286 | 37.32011117 | 46.07806998 |
| ENSMUSG00000020283 | 0.053546099  | 5.655682781  | 0.063027953 | 0.801772604 | 0.999071534 | Pex13         | Pex13         | PEX13    | 56.84582717 | 47.07629526 | 48.94180019 | 51.20399463 | 52.06043903 | 43.80282124 | 61.22066763 | 52.84807608 | 43.05562299 | 43.85586518 |
| ENSMUSG00000027479 | -0.060698961 | 7.531711466  | 0.062946722 | 0.801897723 | 0.999071534 | Mapre1        | Mapre1        | MAPRE1   | 182.2575471 | 225.1835887 | 181.5626343 | 178.7283065 | 213.7355713 | 240.0423709 | 206.3123556 | 169.5974206 | 112.981726  | 162.6131037 |
| ENSMUSG00000024210 | 0.168055112  | 0.895844018  | 0.06294495  | 0.801900454 | 0.999071534 | Ip6k3         | Ip6k3         | IP6K3    | 3.017741442 | 2.01586151  | 0.269280881 | 0.693821065 | 2.550699902 | 1.673529715 | 0.776583522 | 2.279720929 | 0.707117896 | 3.464025119 |
| ENSMUSG00000079509 | 0.050183599  | 5.856134153  | 0.062919043 | 0.801940377 | 0.999071534 | Zfx           | Zfx           | ZFY      | 57.5476275  | 58.69714396 | 63.81956888 | 53.14669362 | 61.87082327 | 79.31075606 | 61.80310527 | 56.64761096 | 45.01983937 | 44.83624965 |
| ENSMUSG00000042505 | 0.101800024  | 3.01748674   | 0.062898228 | 0.80197246  | 0.999071534 | Acn9          | Sdhaf3        | SDHAF3   | 5.403862583 | 4.506043375 | 8.751628644 | 13.87642131 | 6.801866406 | 6.184783729 | 8.671849326 | 7.599069763 | 9.506807267 | 6.731973344 |
| ENSMUSG00000043618 | 0.1289294    | 3.778048648  | 0.062877345 | 0.802004653 | 0.999071534 | Elf5a3-ps     | Elf5a3-ps     |          | 17.89590855 | 15.11896132 | 11.71371834 | 7.909560147 | 15.23879685 | 27.43133489 | 31.90463969 | 2.694215643 | 2.828471584 | 8.56202435  |
| ENSMUSG00000064371 | -0.342593519 | -0.863369904 | 0.062830843 | 0.802076361 | 0.999071534 | mt-Tt         | mt-Tt         |          | 0           | 0           | 1.144443746 | 1.110113705 | 0.130805123 | 0.9459081   | 0.258861174 | 0           | 0.628549241 | 0           |
| ENSMUSG00000005262 | -0.051054505 | 6.409450846  | 0.062821449 | 0.80209085  | 0.999071534 | Ufd1l         | Ufd1l         | UFD1L    | 100.2170879 | 88.99435665 | 89.19929195 | 79.72004042 | 91.04036574 | 97.86510725 | 82.51199919 | 76.54335725 | 56.96227495 | 93.00580649 |
| ENSMUSG00000046169 | 0.128316939  | 3.548415663  | 0.062766353 | 0.802175854 | 0.999071534 | Adamts6       | Adamts6       | ADAMTS6  | 12.28150587 | 21.52228612 | 8.078426441 | 1.942698983 | 14.38856355 | 13.97033501 | 10.41916225 | 24.93876531 | 3.457020824 | 6.797332309 |
| ENSMUSG00000027351 | 0.053469016  | 6.459479169  | 0.062722803 | 0.802243071 | 0.999071534 | Spred1        | Spred1        | SPRED1   | 82.04045921 | 93.14465976 | 84.62151697 | 90.0579743  | 97.71142702 | 122.8952908 | 105.0329213 | 73.36556444 | 64.7405718  | 73.659553   |
| ENSMUSG00000025393 | -0.075892252 | 9.879579096  | 0.062716245 | 0.802253195 | 0.999071534 | Atp5b         | Atp5b         | ATP5B    | 1247.239556 | 1159.476108 | 747.1198054 | 805.9425497 | 1081.496759 | 1269.699719 | 1468.778301 | 621.051247  | 476.5188932 | 727.7067108 |
| ENSMUSG00000025870 | -0.148660198 | 2.062965208  | 0.062700947 | 0.802276815 | 0.999071534 | Arl10         | Arl10         | ARL10    | 8.772504193 | 5.929004441 | 2.01960661  | 1.80393477  | 3.793348573 | 8.003837767 | 7.312828163 | 1.934308667 | 1.492804447 | 0.915025503 |
| ENSMUSG00000097664 | 0.232008486  | -0.569497559 | 0.062692392 | 0.802290024 | 0.999071534 | Gm26765       | Gm26765       |          | 0.491260235 | 0.415030311 | 0.605881983 | 0.069382107 | 1.046440986 | 0.145524323 | 1.100159989 | 0.690824524 | 0.707117896 | 0.065358965 |
| ENSMUSG00000027171 | 0.146690872  | 2.05681095   | 0.062664889 | 0.802332498 | 0.999071534 | Prrg4         | Prrg4         | PRRG4    | 5.263502516 | 8.004155995 | 1.009803305 | 1.040731598 | 4.774386997 | 4.656778337 | 6.018522294 | 5.872008453 | 0.942823861 | 3.464025119 |
| ENSMUSG00000013622 | -0.066032293 | 5.162675355  | 0.062642599 | 0.802366928 | 0.999071534 | Atraid        | Atraid        | ATRAID   | 36.84451761 | 44.17108308 | 30.42873959 | 41.83741025 | 35.90600632 | 35.14412402 | 54.42556182 | 33.29774205 | 15.3994564  | 33.00627707 |

|                      |              |              |             |             |             |          |          |          |             |             |             |             |             |             |             |             |             |             |
|----------------------|--------------|--------------|-------------|-------------|-------------|----------|----------|----------|-------------|-------------|-------------|-------------|-------------|-------------|-------------|-------------|-------------|-------------|
| ENSMUSG00000044042   | -0.06433038  | 4.6563746    | 0.062628203 | 0.802389168 | 0.999071534 | Fmn1     | Fmn1     | FMN1     | 21.7558104  | 38.47923882 | 23.96599844 | 21.78598146 | 27.46907587 | 33.10678349 | 20.96775509 | 28.7383002  | 13.19953406 | 25.09784237 |
| ENSMUSG00000006498   | -0.06719347  | 8.107018894  | 0.062583818 | 0.802457756 | 0.999071534 | Ptbp1    | Ptbp1    | PTBP1    | 293.9139805 | 285.659434  | 303.4795533 | 250.9550794 | 333.2260513 | 488.4523903 | 218.4788308 | 213.0502832 | 181.4935933 | 246.0765014 |
| ENSMUSG000000003778  | 0.056429566  | 5.128592043  | 0.062565548 | 0.802485996 | 0.999071534 | Brd8     | Brd8     | BRD8     | 40.42369932 | 37.17485784 | 35.20847524 | 29.48739528 | 35.57899351 | 49.98760497 | 24.39766564 | 39.86057503 | 23.33489056 | 37.25460977 |
| ENSMUSG000000052917  | 0.084230913  | 3.580318226  | 0.062536189 | 0.802531385 | 0.999071534 | Senp7    | Senp7    | SENP7    | 6.035482885 | 19.26926443 | 11.51175768 | 10.12978756 | 12.68809695 | 13.6065242  | 9.836724609 | 14.99089217 | 9.349669957 | 11.11102397 |
| ENSMUSG00000027011   | 0.0577355    | 6.230048217  | 0.062505479 | 0.802578874 | 0.999071534 | Ube2e3   | Ube2e3   | UBE2E3   | 67.5833723  | 52.4716893  | 83.94831477 | 95.60854282 | 79.5295149  | 77.85551283 | 70.4749546  | 71.63850313 | 72.67600597 | 72.94060439 |
| ENSMUSG00000047658   | 0.212368191  | 0.346398197  | 0.062498374 | 0.802589863 | 0.999071534 | Gal3st3  | Gal3st3  | GAL3ST3  | 0.771980369 | 0.770770577 | 0.673202203 | 2.636520049 | 0.588623054 | 0.291048646 | 0.064715293 | 0.759906976 | 2.592765618 | 1.764692042 |
| ENSMUSG00000029072   | 0.244887503  | -0.302533673 | 0.062484758 | 0.802610924 | 0.999071534 | Tas1r3   | Tas1r3   | TAS1R3   | 0.842160403 | 0           | 0.134640441 | 1.665170557 | 0.588623054 | 0.363810808 | 0.323576467 | 1.105319238 | 1.335667137 | 0.261435858 |
| ENSMUSG000000062365  | -0.197066764 | 0.06864694   | 0.062483883 | 0.802612278 | 0.999071534 | Gm4968   | Gm4968   |          | 1.894860906 | 0.770770577 | 1.211763966 | 0.069382107 | 1.177246109 | 1.964578361 | 1.100159989 | 0.621742072 | 0.392843275 | 0.261435858 |
| ENSMUSG00000029094   | -0.070310598 | 5.395756459  | 0.062476399 | 0.802623855 | 0.999071534 | Afap1    | Afap1    | AFAP1    | 27.65093322 | 40.25794015 | 57.96270971 | 45.23713347 | 51.53721854 | 49.04169687 | 19.8028798  | 56.23311625 | 33.31310976 | 39.47681456 |
| ENSMUSG00000038349   | -0.164580186 | 0.695466284  | 0.062476211 | 0.802624146 | 0.999071534 | Plcl1    | Plcl1    | PLCL1    | 1.965040939 | 1.422961066 | 3.231370576 | 0.277528426 | 1.308051232 | 2.546675653 | 1.812028217 | 1.312566595 | 0.864255206 | 0.457512752 |
| ENSMUSG00000019923   | -0.060024274 | 7.627370009  | 0.062457673 | 0.802652826 | 0.999071534 | Zwint    | Zwint    | ZWINT    | 226.1902481 | 188.7202113 | 224.6475753 | 196.8370363 | 211.1848714 | 253.1395599 | 217.3786708 | 152.1886426 | 141.5807165 | 183.7240492 |
| ENSMUSG000000005225  | -0.073981311 | 3.598555622  | 0.062323547 | 0.802860468 | 0.999071534 | Plekha8  | Plekha8  | PLEKHA8  | 14.87816711 | 13.10309981 | 14.33920693 | 9.713494917 | 11.96866877 | 18.11777822 | 13.33135046 | 10.29328541 | 7.306884924 | 8.888819173 |
| ENSMUSG000000064247  | 0.145630065  | 0.555677016  | 0.062302172 | 0.802893581 | 0.999071534 | Plcx d1  | Plcx d1  | PLCXD1   | 1.263240604 | 1.897281421 | 1.683005509 | 0.901967385 | 0.850233301 | 0.800383777 | 1.29430587  | 1.519813953 | 1.257098482 | 1.764692042 |
| ENSMUSG000000051486  | 0.179358837  | 0.595539908  | 0.062295436 | 0.802904018 | 0.999071534 | Pcdhb11  | Pcdhb11  | PCDHB5   | 1.614140771 | 2.54947191  | 1.548365068 | 0           | 1.046440986 | 2.110102684 | 1.48845175  | 1.174401691 | 0.707117896 | 1.764692042 |
| ENSMUSG000000032121  | -0.108756528 | 2.565982654  | 0.062276603 | 0.802933199 | 0.999071534 | Tmem218  | Tmem218  | TMEM218  | 9.263764428 | 7.648415729 | 2.962089695 | 4.579219032 | 6.932671529 | 4.729540499 | 8.348272859 | 6.839162787 | 2.042785033 | 5.22871716  |
| ENSMUSG00000034037   | -0.120576823 | 2.25477284   | 0.062266818 | 0.802948362 | 0.999071534 | Fgd5     | Fgd5     | FGD5     | 3.789721811 | 8.004155995 | 5.654898509 | 1.873316877 | 5.951633105 | 9.313556675 | 5.112508185 | 1.657978857 | 2.907040239 | 3.529384083 |
| ENSMUSG000000063253  | -0.058052115 | 6.823980952  | 0.062266018 | 0.802949603 | 0.999071534 | Scoc     | Scoc     | SCOC     | 116.0075954 | 91.12879825 | 139.5548168 | 116.9088495 | 135.5141076 | 135.0465718 | 143.4090904 | 88.0801268  | 77.07585065 | 98.95347226 |
| ENSMUSG000000027276  | -0.059212005 | 4.853265904  | 0.062217371 | 0.80302501  | 0.999071534 | Jag1     | Jag1     | JAG1     | 22.87869093 | 35.27757642 | 39.11304802 | 24.42250151 | 30.87000907 | 36.81765373 | 22.52092213 | 25.56050739 | 25.61338156 | 26.1435858  |
| ENSMUSG000000027255  | -0.075248674 | 5.292462281  | 0.062068831 | 0.803255452 | 0.999071534 | Arfgap2  | Arfgap2  | ARFGAP2  | 56.14402683 | 56.26625214 | 30.42873959 | 28.65481    | 37.86808316 | 57.84591841 | 62.45025821 | 27.49481605 | 17.6779474  | 25.16320133 |
| ENSMUSG000000039345  | 0.122724085  | 1.811148313  | 0.062067272 | 0.803257872 | 0.999071534 | Mettl22  | Mettl22  | METTL22  | 3.509001677 | 2.01586151  | 5.183656966 | 3.399723221 | 2.616102464 | 5.020589145 | 3.559341141 | 3.108710358 | 0.864255206 | 5.097999231 |
| ENSMUSG000000022686  | 0.20022296   | 0.597325696  | 0.06206028  | 0.803268727 | 0.999071534 | B3gnt5   | B3gnt5   | B3GNT5   | 2.947561409 | 2.075151554 | 0           | 0.485674746 | 1.24264867  | 2.110102684 | 2.588611739 | 0.967154334 | 1.178529826 | 0.392153787 |
| ENSMUSG000000021076  | -0.052793585 | 6.477221969  | 0.062042139 | 0.803296892 | 0.999071534 | Actr10   | Actr10   | ACTR10   | 95.72556575 | 91.78098874 | 93.84438716 | 92.76387646 | 96.01096042 | 77.56446418 | 93.57831437 | 84.28059192 | 75.50447755 | 86.60062797 |
| ENSMUSG000000024978  | 0.163358514  | 2.003715015  | 0.062002311 | 0.803358746 | 0.999071534 | Gpam     | Gpam     | GPAM     | 4.842422314 | 8.537766395 | 1.548365068 | 1.80393477  | 2.354492217 | 12.2968053  | 6.018522294 | 0.967154334 | 1.414235792 | 1.045743432 |
| ENSMUSG000000002372  | -0.05265354  | 6.208711374  | 0.061893859 | 0.803527277 | 0.999071534 | Ranbp3   | Ranbp3   | RANBP3   | 86.95306156 | 68.77645151 | 87.0450449  | 67.30064335 | 80.90296869 | 106.305518  | 60.37936882 | 58.78916699 | 55.07662722 | 75.94711675 |
| ENSMUSG000000003062  | 0.066197604  | 6.229703519  | 0.061889899 | 0.803533433 | 0.999071534 | Stard3nl | Stard3nl | STARD3NL | 104.9191501 | 65.04117871 | 64.42545087 | 78.74869093 | 66.84141795 | 79.52904254 | 129.8188787 | 53.19348834 | 48.63399751 | 62.87532385 |
| ENSMUSG0000000025373 | -0.056884671 | 5.659764898  | 0.061867422 | 0.803568383 | 0.999071534 | Rnf41    | Rnf41    | RNF41    | 57.1265473  | 62.25454663 | 45.23918807 | 46.55539349 | 56.44241066 | 53.55295088 | 62.77383467 | 59.0654968  | 26.2419308  | 40.26112213 |
| ENSMUSG000000003161  | 0.06132987   | 7.224612901  | 0.061856562 | 0.803585272 | 0.999071534 | Sri      | Sri      | SRI      | 130.4646824 | 132.6911194 | 145.2770355 | 161.4521619 | 188.6209876 | 130.5353178 | 173.1134101 | 154.7446934 | 112.9031574 | 161.959514  |
| ENSMUSG0000000051225 | -0.058197489 | 5.036261578  | 0.061847523 | 0.80359933  | 0.999071534 | Fam83a   | Fam83a   | FAM83A   | 28.84399379 | 35.81118682 | 33.66011017 | 39.27027231 | 34.92496789 | 42.9296753  | 35.07568907 | 21.41556024 | 30.7989128  | 25.16320133 |
| ENSMUSG0000000020770 | 0.072697039  | 4.463608499  | 0.061808894 | 0.80365942  | 0.999071534 | Unk      | Unk      | UNK      | 15.43960738 | 20.39577528 | 28.88037453 | 23.45115201 | 22.43307863 | 21.7558863  | 11.45460695 | 24.45518815 | 19.87786974 | 29.99976471 |
| ENSMUSG0000000044726 | 0.294118139  | -0.653156378 | 0.061752103 | 0.803747798 | 0.999071534 | BC030476 | Erich5   | ERICH5   | 0           | 0.355740266 | 0           | 0.971349492 | 1.046440986 | 0.436572969 | 0.323576467 | 0.621742072 | 1.178529826 | 0           |
| ENSMUSG0000000024981 | 0.066638456  | 7.188391765  | 0.061720156 | 0.803797534 | 0.999071534 | Ac d5    | Ac d5    | ACSL5    | 202.8202969 | 133.1061497 | 112.6940489 | 143.6903427 | 148.0059969 | 191.8010578 | 215.437212  | 103.9000084 | 86.81836388 | 138.4302868 |
| ENSMUSG0000000026663 | -0.058789185 | 4.953283467  | 0.061708153 | 0.803816225 | 0.999071534 | Atf6     | Atf6     | ATF6     | 31.15993489 | 44.88256362 | 28.34181276 | 27.89160683 | 31.45863213 | 45.40358879 | 32.42236203 | 28.25472303 | 21.99922343 | 20.91486864 |
| ENSMUSG000000062098  | -0.07766086  | 4.192140413  | 0.061692009 | 0.803841365 | 0.999071534 | Btbd3    | Btbd3    | BTBD3    | 18.24680872 | 31.18656336 | 15.01240914 | 14.8477708  | 17.78949675 | 23.79322682 | 27.63343032 | 14.64547991 | 8.878258026 | 12.67963911 |
| ENSMUSG000000082292  | -0.184843469 | 1.726252645  | 0.061644531 | 0.803915322 | 0.999071534 | Gm12250  | Gm12250  |          | 7.509263589 | 5.632554219 | 0.538561763 | 0.624438959 | 3.466335765 | 7.64002696  | 2.653327033 | 1.174401691 | 0.15713731  | 4.052255799 |
| ENSMUSG0000000020422 | 0.060937838  | 7.419373888  | 0.061619134 | 0.803954896 | 0.999071534 | Tns3     | Tns3     | TNS3     | 152.9924731 | 187.2379602 | 177.3214604 | 143.4128142 | 210.6616509 | 253.9399437 | 130.5307469 | 162.481928  | 146.923385  | 160.3908989 |
| ENSMUSG0000000015120 | -0.061249108 | 7.933749531  | 0.06154998  | 0.804062696 | 0.999071534 | Ube2i    | Ube2i    | UBE2I    | 281.8430147 | 225.0057185 | 295.4684471 | 228.4058948 | 266.5154385 | 322.0453269 | 228.444986  | 235.6402451 | 155.0945252 | 235.4883491 |
| ENSMUSG000000073633  | -0.099383948 | 2.414225868  | 0.061542558 | 0.804074269 | 0.999071534 | Fbxo36   | Fbxo36   | FBXO36   | 5.403862583 | 5.988294485 | 5.250977187 | 4.301690606 | 7.063476652 | 3.201535107 | 4.659501131 | 7.046410144 | 3.221314859 | 5.816947841 |
| ENSMUSG000000090665  | -0.174189539 | 0.995014653  | 0.061491145 | 0.80415446  | 0.999071534 | Gad1-ps  | Gad1-ps  | GAD1     | 3.859901845 | 1.897281421 | 0.269280881 | 1.873316877 | 2.354492217 | 3.128772945 | 2.135604685 | 1.105319238 | 0.078568655 | 2.483640651 |
| ENSMUSG000000000325  | -0.10442664  | 2.791979476  | 0.061449171 | 0.804219957 | 0.999071534 | Arvcf    | Arvcf    | ARVCF    | 6.526743119 | 6.640484974 | 6.597381593 | 4.440454819 | 12.62269439 | 4.729540499 | 3.494625848 | 10.56961522 | 5.735511822 | 6.405178521 |

|                    |              |              |             |             |             |               |               |            |             |             |             |             |             |             |             |             |             |             |
|--------------------|--------------|--------------|-------------|-------------|-------------|---------------|---------------|------------|-------------|-------------|-------------|-------------|-------------|-------------|-------------|-------------|-------------|-------------|
| ENSMUSG00000027649 | -0.062782021 | 4.541763698  | 0.061308116 | 0.804440229 | 0.999071534 | Ctnnb1        | Ctnnb1        | CTNNB1     | 20.00130956 | 25.61329918 | 24.36991976 | 25.11632257 | 27.66528356 | 31.79706459 | 19.28515746 | 22.38271458 | 11.62816095 | 27.2546882  |
| ENSMUSG00000042066 | -0.068018152 | 4.146189087  | 0.061276142 | 0.804490198 | 0.999071534 | Tmcc2         | Tmcc2         | TMCC2      | 19.08896912 | 19.80287483 | 14.06992605 | 15.74973819 | 25.04918109 | 29.25038893 | 13.20191987 | 13.47107822 | 13.1209654  | 16.07830527 |
| ENSMUSG00000046330 | -0.077230437 | 10.27521727  | 0.061275955 | 0.80449049  | 0.999071534 | Rpl37a        | Rpl37a        | RPL37A     | 1507.818021 | 814.9416604 | 1487.238308 | 1727.822599 | 1022.176635 | 835.0913278 | 1003.475341 | 1144.765319 | 1233.685022 | 1452.99514  |
| ENSMUSG00000047417 | 0.068461697  | 4.399984995  | 0.061266999 | 0.804504488 | 0.999071534 | Rexo1         | Rexo1         | REXO1      | 23.8612114  | 27.80703083 | 16.02221244 | 16.02726661 | 23.1525068  | 31.43325378 | 17.92613629 | 27.21848624 | 10.29249382 | 19.86912521 |
| ENSMUSG00000081094 | 0.196662239  | 9.484734828  | 0.061224687 | 0.80457064  | 0.999071534 | Rpl19-ps11    | Rpl19-ps11    |            | 1176.708622 | 58.3414037  | 1106.340501 | 920.4230255 | 171.6817242 | 84.76791817 | 33.39309144 | 443.7165917 | 1549.688153 | 1211.23233  |
| ENSMUSG00000069763 | -0.098205461 | 2.881043807  | 0.061199518 | 0.80461     | 0.999071534 | Tmem100       | Tmem100       | TMEM100    | 7.018003354 | 4.802493597 | 8.549667983 | 7.562649614 | 10.92222779 | 4.729540499 | 4.918362304 | 5.802926001 | 6.599767028 | 10.98030604 |
| ENSMUSG00000078875 | 0.206709694  | 0.979975554  | 0.061189791 | 0.804625215 | 0.999071534 | Gm14419       | Gm14419       | ZNF788     | 1.19360657  | 2.786632087 | 3.635291898 | 1.040731598 | 0.196207685 | 0           | 1.359021163 | 1.4507315   | 1.571373102 | 4.771204409 |
| ENSMUSG00000041975 | -0.069909917 | 4.2154316    | 0.061189305 | 0.804625974 | 0.999071534 | Mettl8        | Mettl8        | METTL8     | 18.66788892 | 14.17032061 | 21.47515029 | 26.15705417 | 16.93926345 | 22.04693494 | 23.42693624 | 11.53676955 | 12.96382809 | 18.0390742  |
| ENSMUSG00000000938 | -0.1220853   | 1.547973084  | 0.061184137 | 0.804634059 | 0.999071534 | Hoxa10        | Hoxa10        | HOXA10     | 2.877381375 | 3.438822576 | 2.288887492 | 3.399723221 | 3.073920395 | 2.619437815 | 1.941458804 | 2.210638477 | 4.242707375 | 1.437897219 |
| ENSMUSG00000071369 | -0.111226439 | 2.565305206  | 0.061071835 | 0.804809812 | 0.999071534 | Map3k5        | Map3k5        | MAP3K5     | 7.439083555 | 6.99622524  | 3.096730136 | 5.481186417 | 8.306125323 | 9.968416129 | 5.824376413 | 1.865226215 | 2.671334273 | 7.777716776 |
| ENSMUSG00000034394 | -0.094465276 | 3.70064662   | 0.06107077  | 0.804811479 | 0.999071534 | Lif           | Lif           | LIF        | 23.2295911  | 16.89766266 | 10.63659481 | 6.60682229  | 12.23027902 | 18.77263767 | 20.77360921 | 6.35558562  | 7.85686551  | 8.104511599 |
| ENSMUSG00000054135 | -0.204329938 | -0.06831894  | 0.061065591 | 0.804819589 | 0.999071534 | A430110L20Rik | A430110L20Rik |            | 0.350900168 | 0.059290044 | 1.346404407 | 1.457024238 | 1.308051232 | 0.509335131 | 1.164875283 | 1.174401691 | 0.471411931 | 0.326794823 |
| ENSMUSG00000086451 | -0.152255078 | 0.694406735  | 0.060999386 | 0.804923287 | 0.999071534 | 4933431K23Rik | 4933431K23Rik |            | 1.684320805 | 1.245090933 | 2.01960661  | 2.567137942 | 0.523220493 | 0.800383777 | 1.100159989 | 1.036236786 | 1.571373102 | 2.091486864 |
| ENSMUSG00000038954 | -0.066496859 | 4.20337249   | 0.060979885 | 0.804953843 | 0.999071534 | Supt3         | Supt3         | AL161905.1 | 22.3874307  | 17.72772328 | 22.28299293 | 19.0800793  | 15.56580966 | 16.29872418 | 19.28515746 | 22.93537419 | 10.68533709 | 17.25476663 |
| ENSMUSG00000008482 | 0.160786049  | 0.340606563  | 0.060921767 | 0.805044937 | 0.999071534 | Rnf151        | Rnf151        | RNF151     | 1.263240604 | 0.415030311 | 1.279084186 | 1.457024238 | 1.111843547 | 1.091432423 | 1.747312924 | 0.552659619 | 0.549980586 | 1.895409971 |
| ENSMUSG00000024969 | -0.055229623 | 5.524385898  | 0.060865687 | 0.805132882 | 0.999071534 | Mark2         | Mark2         | MARK2      | 53.19646542 | 48.08422601 | 49.54768217 | 37.67448386 | 55.26516455 | 64.32175079 | 30.22204205 | 48.42679913 | 29.30610835 | 49.54209509 |
| ENSMUSG00000057123 | 0.264383636  | -0.187601431 | 0.060858188 | 0.805144646 | 0.999071534 | Gja5          | Gja5          | GJA5       | 0.701800335 | 0.118580089 | 2.154247051 | 0           | 0.523220493 | 1.819054038 | 0.776583522 | 0           | 0.15713731  | 1.437897219 |
| ENSMUSG00000094410 | 0.29281617   | 3.179395549  | 0.060824781 | 0.805197058 | 0.999071534 | Zbed6         | Gm38394       | ZBED6      | 11.0884453  | 19.26926443 | 1.009803305 | 0           | 11.05303291 | 25.97609166 | 14.75508691 | 11.4676871  | 0           | 0           |
| ENSMUSG00000015143 | 0.067885322  | 8.020611991  | 0.06081345  | 0.805214839 | 0.999071534 | Actn1         | Actn1         | ACTN1      | 193.2056323 | 286.1337543 | 321.1847713 | 232.8463496 | 282.6044687 | 371.3053102 | 170.9778054 | 284.8269512 | 240.9700652 | 222.4165562 |
| ENSMUSG00000032913 | -0.073763035 | 3.928490193  | 0.060746721 | 0.805319587 | 0.999071534 | Lrig2         | Lrig2         | LRIG2      | 14.87816711 | 21.81873634 | 15.14704958 | 10.96237283 | 17.92030188 | 12.22404314 | 14.62565633 | 20.72473572 | 10.92104306 | 11.89533154 |
| ENSMUSG00000041297 | -0.054695233 | 5.369624711  | 0.060740132 | 0.805329934 | 0.999071534 | Cdk13         | Cdk13         | CDK13      | 35.58127701 | 50.3372477  | 44.16206454 | 41.90679236 | 45.9780008  | 58.4280157  | 29.70431971 | 44.07460463 | 26.08479349 | 41.11078867 |
| ENSMUSG00000029352 | -0.192755078 | 0.710699188  | 0.060733965 | 0.805339617 | 0.999071534 | Crybb3        | Crybb3        | CRYBB3     | 0.912340436 | 0.118580089 | 0.538561763 | 4.162926393 | 2.485297341 | 0.800383777 | 0.517722348 | 1.243484143 | 2.199922343 | 1.699333077 |
| ENSMUSG00000092349 | -0.208537586 | -0.005773382 | 0.06067694  | 0.805429191 | 0.999071534 | BC033916      | Platr17       |            | 0.491260235 | 0.118580089 | 0.538561763 | 2.358991623 | 1.24264867  | 0.582097292 | 0.19414588  | 0.483577167 | 1.178529826 | 1.30717929  |
| ENSMUSG00000061068 | -0.25950471  | 1.396331589  | 0.060661411 | 0.805453591 | 0.999071534 | Mcpt4         | Mcpt4         |            | 8.281243958 | 4.268883197 | 0.201960661 | 0.485674746 | 1.046440986 | 8.513172898 | 2.9769035   | 0           | 0           | 1.045743432 |
| ENSMUSG00000032940 | 0.282705144  | -0.455470711 | 0.060630943 | 0.805501474 | 0.999071534 | Rbm11         | Rbm11         | RBM11      | 0.491260235 | 0           | 0.673202203 | 1.318260024 | 0.261610246 | 0           | 0.064715293 | 0.345412262 | 0.392843275 | 2.287563758 |
| ENSMUSG00000020949 | 0.086420646  | 5.972199846  | 0.060607092 | 0.805538968 | 0.999071534 | Fkbp3         | Fkbp3         | FKBP3      | 90.25152313 | 59.23075436 | 48.60519909 | 69.17396023 | 47.87467509 | 81.05704794 | 135.9668316 | 28.8764651  | 25.29910694 | 51.11071024 |
| ENSMUSG00000030095 | -0.054619798 | 6.249345901  | 0.060578166 | 0.805584448 | 0.999071534 | Tmem43        | Tmem43        | TMEM43     | 78.8823577  | 102.4531967 | 68.33002365 | 64.6641233  | 88.81667865 | 99.53863696 | 89.88954264 | 67.00997882 | 53.1909795  | 55.88191465 |
| ENSMUSG00000041362 | -0.106841644 | 2.328610429  | 0.060564833 | 0.805605415 | 0.999071534 | 4930506M07Rik | Shtn1         | SHTN1      | 5.474042616 | 4.98036373  | 4.914376085 | 6.03624327  | 4.839789558 | 9.313556675 | 6.600959935 | 2.694215643 | 1.649941757 | 3.790819941 |
| ENSMUSG00000046668 | -0.071081959 | 4.93362993   | 0.060489785 | 0.805723484 | 0.999071534 | Cxnc5         | Cxnc5         | CXNC5      | 23.51031124 | 27.45129056 | 32.78494731 | 39.96409337 | 37.34486267 | 21.68312413 | 16.8259763  | 39.79149258 | 28.67755911 | 32.81020018 |
| ENSMUSG00000031353 | 0.068593152  | 8.777471875  | 0.060425284 | 0.805825021 | 0.999071534 | Rbbp7         | Rbbp7         | RBBP7      | 390.4817066 | 312.3399539 | 521.3951065 | 562.5501199 | 422.631353  | 494.7826984 | 424.3381793 | 337.3986975 | 467.4834978 | 423.6568079 |
| ENSMUSG00000016619 | -0.051964494 | 6.293687412  | 0.060347753 | 0.805947144 | 0.999071534 | Nup50         | Nup50         | NUP50      | 81.47901894 | 96.34632216 | 84.01563499 | 63.5540096  | 89.99392476 | 113.2906855 | 79.4056651  | 65.0065877  | 53.66239143 | 68.23475894 |
| ENSMUSG00000021065 | -0.057488878 | 5.687191629  | 0.060325217 | 0.805982658 | 0.999071534 | Fut8          | Fut8          | FUT8       | 57.26690737 | 77.01776768 | 38.84376714 | 47.17983245 | 52.4528544  | 54.20781033 | 54.6197077  | 47.87413951 | 49.18397809 | 35.3591998  |
| ENSMUSG00000045165 | -0.114377406 | 2.429925833  | 0.06024649  | 0.806106777 | 0.999071534 | Al467606      | Al467606      | C16orf54   | 7.509263589 | 7.114805329 | 2.154247051 | 5.203657991 | 6.474853598 | 6.184783729 | 8.477703446 | 4.766689215 | 1.335667137 | 4.379050622 |
| ENSMUSG00000073478 | -0.155121034 | 1.107979363  | 0.060191076 | 0.806194192 | 0.999071534 | D730003115Rik | D730003115Rik |            | 2.877381375 | 1.245090933 | 2.894769475 | 2.428373729 | 1.569661478 | 1.309718907 | 1.359021163 | 4.006782239 | 0.15713731  | 2.483640651 |
| ENSMUSG00000097660 | 0.192017454  | 0.610106126  | 0.060180734 | 0.80621051  | 0.999071534 | Gm26762       | Gm26762       |            | 0.561440268 | 1.837991377 | 1.144443746 | 2.22022741  | 0.915635862 | 0.509335131 | 0.129430587 | 4.490359406 | 0.864255206 | 0.980384468 |
| ENSMUSG00000073144 | -0.171053877 | -0.012944993 | 0.060163876 | 0.806237115 | 0.999071534 | 4930599N23Rik | 4930599N23Rik |            | 0.631620302 | 0.830060622 | 0.807842644 | 1.734552664 | 0.654025616 | 1.236956746 | 0.776583522 | 0.27632981  | 0.864255206 | 0.784307574 |
| ENSMUSG00000045319 | 0.176846469  | 0.622839808  | 0.060142588 | 0.806270717 | 0.999071534 | Proser2       | Proser2       | PROSER2    | 1.403600671 | 2.608761954 | 0.201960661 | 0.485674746 | 2.223687094 | 0.727621615 | 0.711868228 | 2.832380548 | 0.785686551 | 2.0261279   |
| ENSMUSG00000020272 | -0.071892069 | 4.050823357  | 0.060139731 | 0.806275227 | 0.999071534 | Stk10         | Stk10         | STK10      | 19.79076946 | 17.37198301 | 15.48365068 | 15.74973819 | 19.29375567 | 31.21496729 | 10.22501637 | 15.19813953 | 9.192532646 | 15.03256184 |
| ENSMUSG00000041075 | -0.077429916 | 5.431196129  | 0.060112587 | 0.806318081 | 0.999071534 | Fzd7          | Fzd7          | FZD7       | 27.08949295 | 61.12803578 | 43.75814322 | 36.35622383 | 61.67461558 | 31.50601594 | 28.47472913 | 76.3361099  | 29.62038297 | 33.39843086 |

|                     |              |             |             |             |             |           |           |           |             |             |             |             |             |             |             |             |             |             |
|---------------------|--------------|-------------|-------------|-------------|-------------|-----------|-----------|-----------|-------------|-------------|-------------|-------------|-------------|-------------|-------------|-------------|-------------|-------------|
| ENSMUSG00000032397  | 0.075486826  | 4.922191786 | 0.060059941 | 0.806401226 | 0.999071534 | Tipin     | Tipin     | TIPIN     | 39.16045872 | 19.6250047  | 36.21827854 | 29.90368792 | 27.66528356 | 48.6051239  | 48.73061599 | 14.02373784 | 20.58498764 | 22.2874069  |
| ENSMUSG00000062647  | -0.064674601 | 9.885819765 | 0.060057294 | 0.806405408 | 0.999071534 | RpI7a     | RpI7a     |           | 1180.287804 | 936.9012817 | 1035.923551 | 916.884538  | 956.1854505 | 848.1157547 | 1219.624421 | 933.3039318 | 583.2936954 | 897.0517878 |
| ENSMUSG00000022412  | 0.05622462   | 4.893007778 | 0.06003828  | 0.806435447 | 0.999071534 | Mief1     | Mief1     | MIEF1     | 28.49309362 | 36.34479722 | 30.36141937 | 20.1208109  | 36.03681144 | 41.0378591  | 28.08643737 | 24.93876531 | 25.53481291 | 27.51612406 |
| ENSMUSG00000062861  | 0.103560817  | 2.275053281 | 0.060028977 | 0.806450146 | 0.999071534 | Zfp28     | Zfp28     |           | 5.193322482 | 5.869714396 | 4.375814322 | 2.358991623 | 5.951633105 | 3.419821592 | 5.047792891 | 6.700997882 | 4.32127603  | 3.594743048 |
| ENSMUSG00000032570  | 0.051662954  | 6.52545054  | 0.059999364 | 0.806496945 | 0.999071534 | Atp2c1    | Atp2c1    | ATP2C1    | 84.84766055 | 117.2164178 | 86.97772468 | 91.23747011 | 88.5550684  | 104.4864639 | 95.58448847 | 96.23185618 | 73.77596714 | 83.13660285 |
| ENSMUSG00000051378  | 0.105088542  | 3.645224569 | 0.059918969 | 0.806624059 | 0.999071534 | Kif18b    | Kif18b    | KIF18B    | 20.14166963 | 8.597056439 | 11.64639812 | 7.770795933 | 14.25775843 | 33.39783214 | 12.42533635 | 3.868617334 | 6.206923753 | 10.98030604 |
| ENSMUSG00000000826  | 0.060690848  | 5.947243387 | 0.059883413 | 0.806680305 | 0.999071534 | Dnajc5    | Dnajc5    | DNAJC5    | 58.81086811 | 88.04571594 | 58.97251302 | 42.32308499 | 66.31819746 | 67.74157238 | 42.90623958 | 86.14581814 | 50.99105716 | 54.77081226 |
| ENSMUSG00000027953  | -0.053626731 | 4.702722501 | 0.059823863 | 0.806774549 | 0.999071534 | Slc50a1   | Slc50a1   | SLC50A1   | 26.03679244 | 28.45922132 | 28.88037453 | 27.19778577 | 26.29182976 | 27.57685922 | 24.20351976 | 23.211704   | 19.72073243 | 28.3657906  |
| ENSMUSG00000031154  | -0.056543488 | 6.193018536 | 0.05979327  | 0.806822985 | 0.999071534 | Otud5     | Otud5     | OTUD5     | 82.32117934 | 73.6975252  | 78.02413538 | 64.5947412  | 89.01288633 | 77.20065338 | 46.91858777 | 93.81397035 | 50.44107657 | 78.23468051 |
| ENSMUSG00000031004  | -0.07645864  | 7.074882306 | 0.059761729 | 0.806872935 | 0.999071534 | Mki67     | Mki67     | MKI67     | 110.3931928 | 69.84367231 | 182.5724376 | 156.8035608 | 196.4038925 | 243.4621925 | 123.6709258 | 78.13225366 | 88.70401161 | 124.4434684 |
| ENSMUSG00000035845  | -0.092225361 | 3.195707091 | 0.059677962 | 0.80700566  | 0.999071534 | Alg12     | Alg12     | ALG12     | 15.15888725 | 11.26510844 | 5.116336746 | 5.064893778 | 12.29568158 | 11.71470801 | 11.19574577 | 7.391822406 | 5.814080477 | 6.862691273 |
| ENSMUSG00000014773  | 0.084024597  | 3.116572875 | 0.059570664 | 0.807175815 | 0.999071534 | Dll1      | Dll1      | DLL1      | 9.544484562 | 10.49433786 | 6.933982695 | 5.203657991 | 11.18383803 | 10.55051342 | 6.665675228 | 10.70778012 | 6.756904338 | 7.97379367  |
| ENSMUSG00000060397  | 0.150158565  | 0.661227632 | 0.059541332 | 0.807222358 | 0.999071534 | Zfp128    | Zfp128    | ZNF8      | 1.122880537 | 2.786632087 | 0.471241542 | 1.248877918 | 1.504258917 | 1.746291877 | 1.617882337 | 0.621742072 | 1.807079067 | 1.503256184 |
| ENSMUSG00000035673  | 0.060757538  | 6.114258591 | 0.059538595 | 0.807226702 | 0.999071534 | Sbno2     | Sbno2     | SBN02     | 82.32117934 | 85.08121372 | 58.16467038 | 38.0907765  | 90.97496318 | 86.65973437 | 54.6197077  | 81.79362363 | 45.88409458 | 76.20855261 |
| ENSMUSG00000024493  | -0.053660025 | 6.591299383 | 0.059521583 | 0.807253702 | 0.999071534 | Lars      | Lars      | LARS      | 100.7083481 | 96.58348234 | 123.734565  | 89.57229955 | 98.88867313 | 133.7368529 | 75.52274749 | 78.33950101 | 68.11902397 | 109.0187528 |
| ENSMUSG00000059851  | 0.06632666   | 4.54821966  | 0.059352946 | 0.807521574 | 0.999071534 | Suv420h2  | Suv420h2  | KMT5C     | 24.77355184 | 19.26926443 | 25.11044219 | 18.87193298 | 30.41219114 | 28.01343219 | 13.9137881  | 24.45518815 | 16.26371161 | 33.3307019  |
| ENSMUSG00000055305  | -0.117780567 | 1.723889509 | 0.059180867 | 0.807795329 | 0.999071534 | Zfp93     | Zfp93     | ZNF235    | 4.210802013 | 3.083082309 | 2.221567271 | 3.885397967 | 3.727946011 | 2.692199976 | 2.394465859 | 3.246875263 | 4.399844685 | 1.437897219 |
| ENSMUSG00000038039  | 0.052985977  | 5.279303906 | 0.05908728  | 0.80794439  | 0.999071534 | Gcc2      | Gcc2      | GCC2      | 40.42369932 | 39.7836198  | 30.42873959 | 40.38038601 | 46.30501361 | 42.9296753  | 30.93391028 | 40.75864691 | 30.0917949  | 46.01271101 |
| ENSMUSG00000039000  | 0.065500957  | 5.865212535 | 0.059083263 | 0.807950792 | 0.999071534 | Ube3c     | Ube3c     | UBE3C     | 69.05715301 | 78.20356857 | 41.26729507 | 57.2402379  | 49.57514169 | 95.46395592 | 83.353298   | 35.16296827 | 41.71995586 | 39.99968628 |
| ENSMUSG00000022871  | 0.166719757  | 0.15739235  | 0.058993632 | 0.808093674 | 0.999071534 | Fetub     | Fetub     | FETUB     | 1.263240604 | 1.067220799 | 1.615685288 | 0.346910533 | 0.523220493 | 1.600767553 | 1.035444696 | 1.519813953 | 0.471411931 | 0.522871716 |
| ENSMUSG00000032702  | 0.091346417  | 3.1832283   | 0.058978498 | 0.808117811 | 0.999071534 | Kank1     | Kank1     | KANK1     | 6.175842952 | 13.87387039 | 7.674505119 | 5.61995063  | 11.90326621 | 9.750129644 | 5.241938772 | 12.22759407 | 6.678335683 | 70.17887018 |
| ENSMUSG00000035456  | 0.180771791  | 0.061061024 | 0.058961974 | 0.808144168 | 0.999071534 | Prdm8     | Prdm8     | PRDM8     | 0.210540101 | 1.719411288 | 1.211763966 | 0.693821065 | 0.588623054 | 0.363810808 | 0.647152935 | 1.312566595 | 1.178529826 | 0.980384468 |
| ENSMUSG00000031972  | -0.09617213  | 6.898949096 | 0.058897271 | 0.808247415 | 0.999071534 | Acta1     | Acta1     | ACTA1     | 112.1476936 | 203.8391727 | 137.3332495 | 74.86329297 | 114.8468982 | 333.3962241 | 107.9451095 | 64.59209299 | 53.5882278  | 47.84276202 |
| ENSMUSG00000032409  | 0.058732298  | 4.382932528 | 0.058700272 | 0.808562133 | 0.999071534 | Atr       | Atr       | ATR       | 23.019051   | 19.98074497 | 19.65750434 | 18.0393477  | 25.04918109 | 28.15895651 | 19.09101158 | 14.99089217 | 16.73512354 | 24.44425272 |
| ENSMUSG00000020647  | -0.082288726 | 3.519419055 | 0.058648183 | 0.808645442 | 0.999071534 | Ncoa1     | Ncoa1     | NCOA1     | 10.80772517 | 11.97658897 | 14.81044848 | 13.59889288 | 9.0255535   | 12.7337827  | 6.018522294 | 8.35897674  | 12.96382809 | 12.35284429 |
| ENSMUSG00000030232  | 0.055926923  | 6.228468323 | 0.058637179 | 0.808663046 | 0.999071534 | Aebp2     | Aebp2     | AEBP2     | 58.10906777 | 76.24699711 | 93.23850517 | 66.53744018 | 87.11621205 | 90.87993974 | 52.74296419 | 86.97480756 | 70.31894631 | 66.40470794 |
| ENSMUSG00000063727  | 0.119398363  | 1.469907774 | 0.058625923 | 0.808681056 | 0.999071534 | Tnfrsf11b | Tnfrsf11b | TNFRSF11B | 2.737021308 | 1.956571465 | 3.500651458 | 2.01208109  | 2.943115272 | 4.147443207 | 4.594785837 | 1.381649048 | 1.571373102 | 1.960768935 |
| ENSMUSG00000045932  | -0.073639103 | 4.007748633 | 0.058616807 | 0.808695643 | 0.999071534 | Ifit2     | Ifit2     | IFIT2     | 15.22906728 | 21.99660648 | 14.67580803 | 15.54159187 | 17.59328907 | 32.01535107 | 14.56094103 | 10.98410993 | 9.663944577 | 11.50317775 |
| ENSMUSG00000002486  | -0.079920053 | 3.321666829 | 0.058615958 | 0.808697001 | 0.999071534 | Tchp      | Tchp      | TCHP      | 9.333944461 | 10.73149804 | 12.99280253 | 10.5460802  | 8.894748377 | 10.69603774 | 5.371369359 | 9.257048621 | 8.563983406 | 12.28748533 |
| ENSMUSG00000029467  | -0.067404266 | 7.753681565 | 0.058599806 | 0.808722849 | 0.999071534 | Atp2a2    | Atp2a2    | ATP2A2    | 243.3843563 | 296.8652523 | 195.0266783 | 174.9122906 | 240.6814267 | 363.9563319 | 245.3356776 | 178.8544692 | 114.1602559 | 156.1425662 |
| ENSMUSG00000098188  | 0.071828427  | 4.156157752 | 0.058537545 | 0.808822521 | 0.999071534 | Sowahc    | Sowahc    | SOWAHC    | 15.22906728 | 22.94524719 | 13.73332495 | 13.32136446 | 24.78757084 | 16.95358363 | 11.58403753 | 23.34986891 | 17.20653547 | 17.18940766 |
| ENSMUSG000000001285 | 0.053099342  | 6.069281282 | 0.058441985 | 0.808975612 | 0.999071534 | Myg1      | Myg1      | C12orf10  | 77.54893706 | 53.47962006 | 77.35093317 | 65.01103384 | 68.14946918 | 76.25474528 | 81.86484625 | 48.01230441 | 58.06223612 | 65.94719519 |
| ENSMUSG00000000538  | -0.05613804  | 4.886359034 | 0.058425223 | 0.809002478 | 0.999071534 | Tom1l2    | Tom1l2    | TOM1L2    | 28.91417382 | 39.96148993 | 25.98560505 | 31.7770048  | 29.03873735 | 37.10870238 | 20.96775509 | 32.05425791 | 22.94204729 | 27.38540613 |
| ENSMUSG00000027964  | -0.062194052 | 4.550247178 | 0.058410125 | 0.809026681 | 0.999071534 | Bhlhb9    | Bhlhb9    | BHLHB9    | 22.3874307  | 20.27719519 | 30.63070026 | 29.34863107 | 20.27479409 | 36.52660508 | 21.74433861 | 18.92859196 | 15.71373102 | 20.13056107 |
| ENSMUSG00000031217  | 0.051179583  | 5.785298686 | 0.058402647 | 0.80903867  | 0.999071534 | Efnb1     | Efnb1     | EFNB1     | 57.1265473  | 55.08045125 | 62.80976558 | 45.93095454 | 60.23575923 | 80.76599929 | 52.35467242 | 39.72241013 | 51.93388102 | 48.30027477 |
| ENSMUSG00000024387  | -0.050984364 | 6.495176204 | 0.058385925 | 0.809065483 | 0.999071534 | Csnk2b    | Csnk2b    | CSNK2B    | 92.14638404 | 79.44865951 | 109.2607176 | 88.46218585 | 106.8023831 | 105.432372  | 86.65377797 | 85.66224097 | 58.92649132 | 95.68552404 |
| ENSMUSG00000024833  | 0.088869172  | 4.767896946 | 0.05837819  | 0.809077886 | 0.999071534 | Pola2     | Pola2     | POLA2     | 42.10802013 | 25.25755892 | 22.48495359 | 19.98204669 | 27.40367331 | 63.44860485 | 40.77063489 | 11.88218181 | 11.15674902 | 17.38548456 |
| ENSMUSG00000034108  | -0.049688527 | 5.363346295 | 0.058335664 | 0.809146095 | 0.999071534 | Ccs       | Ccs       | CCS       | 44.9854015  | 35.81118682 | 46.11435093 | 42.46184921 | 47.28605203 | 41.69271855 | 43.35924663 | 37.4426892  | 33.23454111 | 38.62714802 |
| ENSMUSG00000025935  | 0.058262302  | 7.185725786 | 0.058307704 | 0.809190956 | 0.999071534 | Tram1     | Tram1     | TRAM1     | 136.7107053 | 143.6597776 | 147.3639623 | 126.7611087 | 187.3129364 | 166.6253499 | 190.9101158 | 144.5895729 | 103.0820755 | 117.3193413 |

|                     |              |              |             |             |             |           |           |         |             |             |             |             |             |             |             |             |             |             |
|---------------------|--------------|--------------|-------------|-------------|-------------|-----------|-----------|---------|-------------|-------------|-------------|-------------|-------------|-------------|-------------|-------------|-------------|-------------|
| ENSMUSG00000081565  | 0.115308356  | 1.893921045  | 0.058302773 | 0.809198869 | 0.999071534 | Rps12-ps5 | Rps12-ps5 |         | 5.193322482 | 2.727342043 | 4.039213221 | 3.122194795 | 2.812310149 | 1.673529715 | 4.465355525 | 2.763298096 | 2.749902928 | 6.013024734 |
| ENSMUSG000000025450 | 0.152452257  | 0.68654138   | 0.058293146 | 0.809214319 | 0.999071534 | Gm9752    | Gm9752    |         | 1.543960738 | 1.778701332 | 0.538561763 | 1.110113705 | 2.354492217 | 0.582097292 | 0.906014109 | 2.279720929 | 1.964216377 | 1.437897219 |
| ENSMUSG000000027933 | 0.051122053  | 5.471836215  | 0.058259726 | 0.809267962 | 0.999071534 | Ints3     | Ints3     | INTS3   | 51.02088438 | 48.02493597 | 40.66141309 | 39.61718284 | 46.8282341  | 63.37584269 | 44.97712897 | 30.87985622 | 36.53442462 | 44.90160861 |
| ENSMUSG000000097941 | 0.219954481  | -0.284109461 | 0.058246352 | 0.809289433 | 0.999071534 | Gm8984    | Gm8984    |         | 0.350900168 | 1.007930755 | 0.605881983 | 0.277528426 | 1.046440986 | 0.291048646 | 0.258861174 | 1.243484143 | 0           | 1.764692042 |
| ENSMUSG000000082867 | 0.201649694  | 0.080424679  | 0.058151326 | 0.809442071 | 0.999071534 | Gm15730   | Gm15730   |         | 1.543960738 | 0.237160178 | 1.481044848 | 0.069382107 | 1.24264867  | 0.218286485 | 0.970729402 | 0.967154334 | 1.571373102 | 0.784307574 |
| ENSMUSG000000085433 | -0.16849366  | 0.902148938  | 0.058129325 | 0.809477427 | 0.999071534 | Gm16001   | Gm16001   |         | 2.877381375 | 3.379532531 | 0.605881983 | 0.763203172 | 1.962076848 | 2.983248622 | 3.300479967 | 0.207247357 | 0.549980586 | 1.241820326 |
| ENSMUSG000000030279 | 0.067617484  | 3.927366139  | 0.058040012 | 0.809621037 | 0.999071534 | C2cd5     | C2cd5     | C2CD5   | 14.45708691 | 13.63671021 | 18.24377971 | 17.13738032 | 12.68809695 | 20.95550252 | 11.58403753 | 11.605852   | 13.04239675 | 18.10443317 |
| ENSMUSG000000026509 | 0.060431052  | 7.85699513   | 0.057981543 | 0.809715114 | 0.999071534 | Capn2     | Capn2     | CAPN2   | 208.7855998 | 236.7451473 | 215.2900647 | 209.6033439 | 310.1389471 | 279.4067002 | 201.0057015 | 264.171298  | 189.0361842 | 212.4819936 |
| ENSMUSG000000032497 | -0.050583769 | 5.90717758   | 0.057913734 | 0.809824282 | 0.999071534 | Lrrfpf2   | Lrrfpf2   | LRRFPF2 | 60.91626911 | 64.92259863 | 69.54178761 | 61.4725464  | 59.18931824 | 65.0493724  | 41.87079488 | 66.04282449 | 45.56981996 | 65.94719519 |
| ENSMUSG000000001517 | -0.072616928 | 5.658309116  | 0.057880147 | 0.80987838  | 0.999071534 | Foxm1     | Foxm1     | FOXM1   | 71.23273404 | 31.06798327 | 59.30911412 | 46.48601139 | 60.69357716 | 108.9249558 | 36.82300199 | 27.01123889 | 38.81291562 | 36.86245598 |
| ENSMUSG000000073987 | -0.106318093 | 3.529428275  | 0.05782978  | 0.809959537 | 0.999071534 | Ggh       | Ggh       | GGH     | 23.51031124 | 11.68013875 | 6.933982695 | 11.10113705 | 8.436930446 | 14.11585934 | 22.7797833  | 8.635306549 | 3.69272679  | 5.686229912 |
| ENSMUSG000000038530 | 0.203937647  | 0.345299726  | 0.057828843 | 0.809961047 | 0.999071534 | Rgs4      | Rgs4      | RG54    | 0.350900168 | 1.897281421 | 1.88496617  | 0           | 1.373453794 | 1.018670261 | 2.847472913 | 0.27632981  | 0.707117896 | 1.045743432 |
| ENSMUSG000000091876 | 0.312222152  | 2.784997087  | 0.057818033 | 0.80997847  | 0.999071534 | Gm3851    | Gm3851    |         | 3.298461576 | 11.0872383  | 0           | 0.277528426 | 17.26627626 | 13.09718907 | 25.10953387 | 0           | 0.549980586 | 0           |
| ENSMUSG000000021959 | -0.058019775 | 5.766529391  | 0.057735038 | 0.810112297 | 0.999071534 | Lats2     | Lats2     | LATS2   | 40.56405939 | 52.05665899 | 66.31041704 | 61.33378219 | 66.5798077  | 57.4821076  | 33.52252202 | 67.97713316 | 46.51264382 | 49.93424888 |
| ENSMUSG000000078920 | -0.061265017 | 6.372259982  | 0.057731352 | 0.810118243 | 0.999071534 | Ifi47     | Ifi47     |         | 112.3582337 | 76.60273737 | 71.56139422 | 88.73971428 | 89.47070426 | 62.13888594 | 52.54881831 | 100.3077209 | 71.34033883 | 97.45021608 |
| ENSMUSG000000034731 | -0.125041338 | 1.432515389  | 0.057707239 | 0.810157143 | 0.999071534 | Dgkh      | Dgkh      | DGKH    | 2.596661241 | 5.098943819 | 2.88887492  | 1.179495811 | 2.812310149 | 2.983248622 | 1.359021163 | 3.661369977 | 1.257098482 | 2.745076509 |
| ENSMUSG000000027490 | -0.064943542 | 5.202624852  | 0.057682456 | 0.810197134 | 0.999071534 | E2f1      | E2f1      | E2F1    | 55.16150636 | 40.79155055 | 32.51566643 | 28.16913526 | 39.30693952 | 64.32175079 | 43.55339251 | 26.94215643 | 16.73512354 | 29.80368781 |
| ENSMUSG000000083890 | -0.15835284  | 0.631305874  | 0.057645169 | 0.810257321 | 0.999071534 | Gm15703   | Gm15703   |         | 2.38612114  | 0.711480533 | 2.558168373 | 0.763203172 | 1.373453794 | 3.34705943  | 1.100159989 | 1.105319238 | 0.942823861 | 0.326794823 |
| ENSMUSG000000023923 | -0.074384963 | 3.751511169  | 0.057622842 | 0.810293369 | 0.999071534 | Tbc1d5    | Tbc1d5    | TBC1D5  | 17.12392818 | 11.79871884 | 16.96469553 | 10.19916966 | 15.23879685 | 24.37532411 | 9.254286968 | 9.187966168 | 9.113963991 | 13.13715187 |
| ENSMUSG000000091580 | 0.223949279  | 0.208019963  | 0.057606926 | 0.810319071 | 0.999071534 | Gm6467    | Gm6467    |         | 0           | 2.075151554 | 1.009803305 | 0.277528426 | 1.504258917 | 1.236956746 | 1.553167044 | 1.105319238 | 0           | 1.568615148 |
| ENSMUSG000000038721 | 0.17131106   | 0.958426585  | 0.057564236 | 0.810388027 | 0.999071534 | Hoxb7     | Hoxb7     | HOXB7   | 3.859901845 | 2.96450222  | 0.134640441 | 0.901967385 | 1.046440986 | 2.764962138 | 3.688771728 | 0.552659619 | 1.021392516 | 1.503256184 |
| ENSMUSG000000047067 | -0.102309022 | 2.37124525   | 0.057558786 | 0.810396833 | 0.999071534 | Dusp28    | Dusp28    | DUSP28  | 3.158101509 | 3.675982753 | 7.472544458 | 6.730064335 | 5.886230544 | 3.929156722 | 3.365195261 | 4.214029596 | 5.028393926 | 6.470537486 |
| ENSMUSG000000009647 | 0.056760719  | 5.100865365  | 0.057545677 | 0.810418013 | 0.999071534 | Mcu       | Mcu       | MCU     | 29.89669429 | 28.69638149 | 33.12154841 | 33.09526482 | 49.44433657 | 38.78223209 | 28.15115266 | 41.65671879 | 22.70634132 | 38.3003532  |
| ENSMUSG000000003233 | 0.099579546  | 3.184862256  | 0.057436609 | 0.810594342 | 0.999071534 | Dvl3      | Dvl3      | DVL3    | 10.59718506 | 16.24547217 | 3.298690797 | 4.856747458 | 10.33360473 | 14.47967014 | 7.701119924 | 9.80970824  | 4.635550651 | 9.607767782 |
| ENSMUSG000000020599 | -0.187818739 | -0.469146527 | 0.057385787 | 0.810676566 | 0.999071534 | Rgs9      | Rgs9      | RG59    | 0.631620302 | 0.5336104   | 1.211763966 | 0.555056852 | 0.327012808 | 0.436572969 | 0.323576467 | 1.036236786 | 0.549980586 | 0.261435858 |
| ENSMUSG000000023272 | 0.056632494  | 6.422940172  | 0.057363453 | 0.810712711 | 0.999071534 | Crel2     | Crel2     | CRELD2  | 101.8312287 | 77.72924822 | 101.9228136 | 69.9371634  | 85.74275825 | 115.2552639 | 115.9698059 | 53.74614796 | 59.16219729 | 85.88167936 |
| ENSMUSG000000019832 | 0.065383412  | 4.423503482  | 0.057351213 | 0.810732524 | 0.999071534 | Rab32     | Rab32     | RAB32   | 24.28229161 | 19.26926443 | 19.72482456 | 20.88401407 | 24.19894779 | 27.86790786 | 33.65195261 | 19.55033403 | 10.99961171 | 15.81686941 |
| ENSMUSG000000031443 | 0.166472492  | 0.501833851  | 0.057336042 | 0.810757084 | 0.999071534 | F7        | F7        | F7      | 1.894860906 | 1.126510844 | 2.154247051 | 0.277528426 | 0.850233301 | 1.673529715 | 1.100159989 | 1.657978857 | 0.15713731  | 2.156845829 |
| ENSMUSG000000051934 | 0.048720916  | 5.636000408  | 0.057324588 | 0.81077563  | 0.999071534 | Spats2    | Spats2    | SPATS2  | 48.00314294 | 53.42033001 | 52.91369319 | 37.88263018 | 61.93622583 | 66.65013995 | 45.88314308 | 48.97945875 | 39.28432755 | 45.42448033 |
| ENSMUSG000000044986 | -0.09644942  | 2.420740453  | 0.057316028 | 0.81078949  | 0.999071534 | Tst       | Tst       | TST     | 6.526743119 | 4.209593153 | 3.635291898 | 6.799446442 | 6.801866406 | 6.766881022 | 6.730390522 | 4.006782239 | 2.357059653 | 5.163358196 |
| ENSMUSG000000003546 | -0.075951618 | 3.933446165  | 0.057313421 | 0.810793712 | 0.999071534 | Klc4      | Klc4      | KLC4    | 17.68536845 | 19.15068434 | 16.49345398 | 7.63203172  | 20.47100178 | 16.4442485  | 13.39606575 | 20.58657081 | 7.385453579 | 14.37897219 |
| ENSMUSG000000020308 | -0.05305564  | 5.281411327  | 0.057304158 | 0.810808713 | 0.999071534 | Tpgs1     | Tpgs1     | TPGS1   | 44.1432411  | 28.28135118 | 42.61369948 | 41.21297129 | 48.65950583 | 39.36432938 | 33.39309144 | 42.20937841 | 31.42746204 | 36.66637909 |
| ENSMUSG000000020918 | -0.05619566  | 5.620859568  | 0.057274433 | 0.810856859 | 0.999071534 | Kat2a     | Kat2a     | KAT2A   | 62.39004982 | 42.27380166 | 54.73133914 | 41.97617446 | 59.32012337 | 87.7511668  | 37.6643008  | 37.71901901 | 31.58459935 | 46.4048648  |
| ENSMUSG000000021039 | -0.055838546 | 5.708039658  | 0.057245603 | 0.810903566 | 0.999071534 | Snw1      | Snw1      | SNW1    | 60.98644915 | 67.76852076 | 44.83526675 | 45.65342611 | 57.68505933 | 78.00103715 | 63.4857029  | 37.71901901 | 27.10618601 | 48.95386441 |
| ENSMUSG000000007739 | 0.064133132  | 8.644615857  | 0.057207358 | 0.810965548 | 0.999071534 | Cct4      | Cct4      | CCT4    | 505.0155214 | 415.9789516 | 358.6148138 | 373.2063511 | 381.2969341 | 436.2091583 | 594.7982624 | 322.8223    | 290.5468866 | 344.311025  |
| ENSMUSG000000044252 | 0.059184359  | 4.363276476  | 0.057190497 | 0.81099288  | 0.999071534 | Osbpl1a   | Osbpl1a   | OSBPL1A | 15.29924731 | 20.92938568 | 20.12874588 | 23.45115201 | 23.87193498 | 26.77647544 | 16.8259763  | 21.7609725  | 17.12796681 | 18.95409971 |
| ENSMUSG000000031534 | -0.054370264 | 4.490705187  | 0.057126655 | 0.81109641  | 0.999071534 | Smim19    | Smim19    | SMIM19  | 22.45761073 | 23.06382727 | 24.97580175 | 23.65929833 | 23.93733754 | 24.81189708 | 24.39766564 | 18.92859196 | 18.07079067 | 19.93448417 |
| ENSMUSG000000022231 | 0.06051604   | 5.132276331  | 0.05712536  | 0.81109851  | 0.999071534 | Sema5a    | Sema5a    | SEMASA  | 24.0717515  | 34.92183616 | 28.1398521  | 42.66999553 | 47.22064947 | 43.43901043 | 25.7566868  | 36.82094713 | 35.43446345 | 29.99976471 |
| ENSMUSG000000084800 | -0.237722064 | -0.492401576 | 0.057121552 | 0.811104688 | 0.999071534 | Gm12205   | Gm12205   |         | 0.070180034 | 0.5336104   | 1.077123525 | 0.485674746 | 1.046440986 | 0.218286485 | 0.129430587 | 0.690824524 | 0           | 1.503256184 |

|                     |              |              |             |             |             |             |             |            |             |             |             |             |             |             |             |             |             |             |
|---------------------|--------------|--------------|-------------|-------------|-------------|-------------|-------------|------------|-------------|-------------|-------------|-------------|-------------|-------------|-------------|-------------|-------------|-------------|
| ENSMUSG00000056130  | -0.131767589 | 1.080536951  | 0.05711745  | 0.811111342 | 0.999071534 | Ticam2      | Ticam2      | TICAM2     | 3.228281543 | 3.616692709 | 1.077123525 | 1.248877918 | 1.63506404  | 3.710870238 | 2.006174098 | 1.105319238 | 1.178529826 | 1.503256184 |
| ENSMUSG00000026554  | -0.055918293 | 5.678949077  | 0.057106442 | 0.81111292  | 0.999071534 | Dcaf8       | Dcaf8       |            | 50.81034428 | 67.2942004  | 39.11304802 | 58.07282318 | 54.87274918 | 55.00819411 | 37.7290161  | 62.03604225 | 30.72034414 | 58.5616322  |
| ENSMUSG00000016344  | 0.06028372   | 4.802401311  | 0.056841675 | 0.811559295 | 0.999071534 | Pdpdf       | Pdpdf       | PPDPF      | 28.63345369 | 24.90181865 | 34.13135171 | 24.14497308 | 29.49655528 | 23.35665385 | 19.73816451 | 35.09388582 | 25.22053829 | 31.306944   |
| ENSMUSG00000040767  | 0.087805062  | 4.319339885  | 0.056742243 | 0.811721088 | 0.999071534 | Snrnp25     | Snrnp25     | SNRNP25    | 38.03757818 | 10.79078808 | 14.94508892 | 18.31687613 | 18.11650956 | 18.55435119 | 37.85844669 | 10.50053276 | 16.02800564 | 15.68615148 |
| ENSMUSG00000028106  | -0.057377479 | 4.906539563  | 0.056669247 | 0.81183996  | 0.999071534 | Rprd2       | Rprd2       | RPRD2      | 22.03653053 | 38.1827886  | 34.93919436 | 28.93233843 | 33.94392947 | 33.32506998 | 19.93231039 | 30.94893867 | 25.92765618 | 30.84943125 |
| ENSMUSG00000033004  | 0.078739483  | 6.218393773  | 0.056655679 | 0.811862065 | 0.999071534 | Mycbp2      | Mycbp2      | MYCBP2     | 46.38900217 | 55.37690148 | 102.5960158 | 98.17568077 | 69.6537281  | 58.50077786 | 31.7752091  | 79.79023251 | 87.76118774 | 99.34562605 |
| ENSMUSG00000000881  | -0.049303293 | 5.910775448  | 0.05661096  | 0.811934939 | 0.999071534 | Dlg3        | Dlg3        | DLG3       | 57.19672734 | 70.37728271 | 62.60780492 | 60.70934323 | 66.05658721 | 51.806659   | 55.84929827 | 64.03943337 | 46.11980054 | 65.09752865 |
| ENSMUSG00000041592  | 0.238587821  | -0.175748553 | 0.056572474 | 0.81199768  | 0.999071534 | Sdk2        | Sdk2        | SDK2       | 1.263240604 | 0           | 1.750325729 | 0.069382107 | 0.588623054 | 0.363810808 | 0.129430587 | 0.552659619 | 1.335667137 | 1.372538255 |
| ENSMUSG00000048175  | -0.053030744 | 5.42631582   | 0.056532744 | 0.812062471 | 0.999071534 | Asb8        | Asb8        | ASB8       | 49.33656358 | 41.14729082 | 42.41173882 | 50.99584831 | 42.11924967 | 50.71522658 | 36.17584905 | 33.29774205 | 45.17697668 | 36.33958426 |
| ENSMUSG000000060198 | -0.164811489 | 1.980789648  | 0.056517513 | 0.812087317 | 0.999071534 | Gm11353     | Gm11353     |            | 2.456301174 | 3.379532531 | 2.894769475 | 9.435966491 | 2.419894779 | 0.509335131 | 2.265035272 | 1.243484143 | 9.349669957 | 2.0261279   |
| ENSMUSG00000027108  | 0.053743689  | 6.286122676  | 0.056510565 | 0.812098652 | 0.999071534 | Ola1        | Ola1        | OLA1       | 73.12759495 | 80.81233053 | 74.25420304 | 79.30374779 | 89.4053017  | 84.76791817 | 116.1639518 | 65.55924732 | 52.79813623 | 67.3850924  |
| ENSMUSG00000033569  | 0.205649299  | -0.45483682  | 0.05649897  | 0.812111757 | 0.999071534 | Baib        | Adgrb3      | ADGRB3     | 0.701800335 | 0.118580089 | 0.269280881 | 1.248877918 | 0.523220493 | 1.236956746 | 0.19414588  | 0.207247357 | 0.864255206 | 0.653589645 |
| ENSMUSG00000093686  | 0.244428428  | -0.433121641 | 0.056482997 | 0.812143633 | 0.999071534 | Gm4705      | Gm4705      |            | 2.105401006 | 0.118580089 | 0.134640441 | 0           | 0.588623054 | 0.509335131 | 1.100159989 | 1.174401691 | 0.15713731  | 0.261435858 |
| ENSMUSG00000060183  | -0.105974275 | 2.96778543   | 0.056416611 | 0.812252    | 0.999071534 | Cxcl11      | Cxcl11      | CXCL11     | 17.05374815 | 4.565333419 | 9.020909526 | 5.342422204 | 5.690022859 | 6.621356699 | 4.141778783 | 7.115492597 | 4.714119306 | 13.20251083 |
| ENSMUSG00000029475  | 0.060549839  | 4.492016923  | 0.056409229 | 0.812264055 | 0.999071534 | Kdm2b       | Kdm2b       | KDM2B      | 28.63345369 | 21.28512594 | 21.67711095 | 16.9986161  | 25.63780415 | 34.34374024 | 17.92613629 | 15.61263424 | 21.37067419 | 22.35276586 |
| ENSMUSG00000021275  | -0.086106763 | 3.163312829  | 0.056406516 | 0.812268484 | 0.999071534 | Tecpr2      | Tecpr2      | TECPR2     | 5.684582717 | 14.70393101 | 9.290190407 | 10.89299073 | 6.344048475 | 12.51509178 | 8.089411685 | 6.35558562  | 6.521198373 | 8.627383315 |
| ENSMUSG00000025218  | -0.082659231 | 3.001293753  | 0.056394001 | 0.812288924 | 0.999071534 | Poll        | Poll        | POLL       | 9.193584394 | 6.284744707 | 6.866662475 | 8.325852786 | 11.44544828 | 8.222124252 | 5.371369359 | 7.599069763 | 6.285492408 | 9.411690889 |
| ENSMUSG000000062115 | -0.063759343 | 4.361741799  | 0.056390374 | 0.812294847 | 0.999071534 | Rai1        | Rai1        | RAI1       | 23.4401312  | 24.9611087  | 19.92678522 | 14.22333184 | 26.55344001 | 30.99668081 | 17.40841395 | 17.20153065 | 10.29249382 | 23.79066308 |
| ENSMUSG00000055963  | 0.131370055  | 1.589847605  | 0.056380243 | 0.812311395 | 0.999071534 | Triqk       | Triqk       | TRIQK      | 3.087921476 | 5.573264174 | 2.086926831 | 0.763203172 | 2.87771271  | 2.182864846 | 5.889091707 | 2.556050739 | 1.885647722 | 1.960768935 |
| ENSMUSG00000031310  | -0.059091087 | 5.007911623  | 0.056342158 | 0.812373615 | 0.999071534 | Znym3       | Znym3       | ZMYM3      | 34.17767633 | 33.9139054  | 35.67971678 | 32.60959008 | 33.35530641 | 32.88849701 | 18.63800452 | 40.4823171  | 20.11357571 | 40.13040421 |
| ENSMUSG00000051483  | -0.119269561 | 1.719753559  | 0.056265707 | 0.812498583 | 0.999071534 | Cbr1        | Cbr1        |            | 4.56170218  | 2.96450222  | 4.847055865 | 2.567137942 | 2.158284533 | 4.729540499 | 5.371369359 | 1.796143762 | 1.099961171 | 2.222204793 |
| ENSMUSG00000041966  | -0.083572936 | 2.992463365  | 0.056229336 | 0.812558068 | 0.999071534 | Dcaf17      | Dcaf17      | DCAF17     | 9.263764428 | 11.56155866 | 6.126140051 | 5.550568524 | 9.548773993 | 11.64194584 | 8.154126978 | 6.148338263 | 5.499805857 | 6.078383699 |
| ENSMUSG00000050370  | -0.110183724 | 3.766623149  | 0.056184838 | 0.81263087  | 0.999071534 | Ch25h       | Ch25h       | CH25H      | 12.562226   | 11.56155866 | 11.5790779  | 17.20676242 | 14.97718661 | 21.02826468 | 21.48547744 | 4.421276953 | 1.571373102 | 14.05217737 |
| ENSMUSG00000097448  | 0.185208366  | 0.062002055  | 0.056179577 | 0.81263948  | 0.999071534 | Gm16880     | Platr22     |            | 1.614140771 | 0.948640711 | 0.06732022  | 1.387642131 | 0.39241537  | 0.582097292 | 1.359021163 | 1.381649048 | 0.707117896 | 0.588230681 |
| ENSMUSG00000047414  | 0.052142356  | 6.322632927  | 0.056121604 | 0.81273438  | 0.999071534 | Flrt2       | Flrt2       | FLRT2      | 57.89852767 | 88.99435665 | 101.3842518 | 76.73660984 | 81.81860456 | 102.8129342 | 76.16990043 | 82.9894287  | 65.29055239 | 68.4961948  |
| ENSMUSG00000069516  | -0.115469905 | 10.54795506  | 0.056078738 | 0.812804584 | 0.999071534 | Lyz2        | Lyz2        | LYZ        | 2943.631327 | 1918.210807 | 789.3295835 | 1355.865126 | 1115.375285 | 1807.775903 | 3664.115202 | 793.8955429 | 287.1684344 | 699.8637919 |
| ENSMUSG00000036940  | -0.0498036   | 6.678694217  | 0.056052949 | 0.812846833 | 0.999071534 | Kdm1a       | Kdm1a       | KDM1A      | 106.2525708 | 107.3149804 | 107.241111  | 112.4683947 | 106.3445652 | 120.4941395 | 111.8927424 | 87.66563209 | 66.94049414 | 104.901138  |
| ENSMUSG00000087034  | -0.390573045 | -1.030344808 | 0.056004806 | 0.812925731 | 0.999071534 | Cbfa2t2-ps1 | Cbfa2t2-ps1 |            | 0.701800335 | 1.363671021 | 0           | 0           | 0           | 0           | 0.19414588  | 0           | 0           | 1.241820326 |
| ENSMUSG000000001865 | 0.212461769  | 1.365226516  | 0.055990075 | 0.812949881 | 0.999071534 | Cpa3        | Cpa3        | CPA3       | 7.439083555 | 1.837991377 | 1.077123525 | 0.971349492 | 0.523220493 | 9.313556675 | 3.624056435 | 0           | 0.707117896 | 0.588230681 |
| ENSMUSG00000066613  | 0.065026277  | 4.504424668  | 0.055969432 | 0.812983726 | 0.999071534 | Zfp932      | Zfp932      | ZNF788     | 28.63345369 | 15.71186177 | 27.33200946 | 20.81463196 | 22.10606582 | 18.918162   | 31.06334087 | 15.75079915 | 19.40645781 | 25.29391926 |
| ENSMUSG00000051238  | 0.134256433  | 1.051585248  | 0.055950902 | 0.813014114 | 0.999071534 | Swsap1      | Swsap1      | SW SAP1    | 3.158101509 | 1.007930755 | 1.817645949 | 2.775284262 | 0.784830739 | 3.274297269 | 2.78275762  | 1.105319238 | 1.414235792 | 1.503256184 |
| ENSMUSG00000038332  | 0.070604365  | 4.492970946  | 0.055913126 | 0.81307608  | 0.999071534 | Sesn1       | Sesn1       | SESN1      | 28.00183338 | 26.73981003 | 16.5607742  | 17.76181928 | 24.85297341 | 34.70755105 | 33.7166679  | 12.57300634 | 18.30649664 | 13.79074151 |
| ENSMUSG00000097141  | 0.105064455  | 3.83806201   | 0.055818103 | 0.813232049 | 0.999071534 | Gm10524     | Gm10524     |            | 4.421342113 | 8.182026128 | 24.63920065 | 19.56575405 | 13.27672    | 11.71470801 | 5.630230533 | 17.06336574 | 17.59937874 | 16.60117698 |
| ENSMUSG00000026383  | -0.086424019 | 2.862925504  | 0.055790766 | 0.813276943 | 0.999071534 | Epb4.1l5    | Epb41l5     | EPB41L5    | 8.070703857 | 7.707705773 | 5.85685917  | 7.909560147 | 8.633138131 | 6.985167506 | 3.753487022 | 7.944482025 | 6.835472994 | 7.516280918 |
| ENSMUSG00000030056  | 0.057525835  | 5.174370439  | 0.055760553 | 0.813326577 | 0.999071534 | Isy1        | Isy1        | ISY1-RAB43 | 42.17820016 | 38.95355918 | 38.97840758 | 30.04245214 | 33.35530641 | 58.71906435 | 47.630456   | 24.04069343 | 24.51342039 | 27.64684199 |
| ENSMUSG00000021009  | 0.055553066  | 4.671871443  | 0.055730207 | 0.813376443 | 0.999071534 | Ptpn21      | Ptpn21      | PTPN21     | 24.00157147 | 23.71601776 | 29.82285761 | 23.38176991 | 28.25390661 | 38.85499425 | 20.06174098 | 24.86968286 | 21.68494881 | 21.1763045  |
| ENSMUSG00000028277  | -0.050311829 | 6.145227564  | 0.055716314 | 0.813399277 | 0.999071534 | Ube2j1      | Ube2j1      | UBE2J1     | 60.49518891 | 71.5630836  | 78.02413538 | 69.86778129 | 93.46026052 | 85.42277763 | 62.77383467 | 78.54674837 | 51.93388102 | 59.14986288 |
| ENSMUSG000000001948 | 0.123400855  | 1.768492902  | 0.055675371 | 0.813466588 | 0.999071534 | Spa17       | Spa17       | SPA17      | 3.158101509 | 2.253021687 | 4.914376085 | 3.677251647 | 2.223687094 | 2.546675653 | 2.070889391 | 3.730452429 | 5.735511822 | 1.568615148 |
| ENSMUSG00000079109  | 0.079152449  | 3.212566226  | 0.055666609 | 0.813481849 | 0.999071534 | Pms2        | Pms2        | PMS2       | 8.842684226 | 8.715636528 | 10.36731393 | 6.521918016 | 11.90326621 | 13.53376204 | 12.55476693 | 7.529987311 | 5.892649132 | 6.928050238 |

|                     |              |              |             |             |             |               |               |          |             |             |             |             |             |             |             |             |             |             |
|---------------------|--------------|--------------|-------------|-------------|-------------|---------------|---------------|----------|-------------|-------------|-------------|-------------|-------------|-------------|-------------|-------------|-------------|-------------|
| ENSMUSG00000058603  | -0.064871831 | 8.808119903  | 0.055610457 | 0.813573361 | 0.999071534 | Rpl28-ps1     | Rpl28-ps1     |          | 359.5323118 | 435.1296359 | 549.1983575 | 472.0064709 | 560.3691478 | 363.1559482 | 384.797135  | 526.8918644 | 314.4317577 | 511.826051  |
| ENSMUSG00000066149  | -0.079099319 | 5.256854262  | 0.055602835 | 0.813585902 | 0.999071534 | Cdc26         | Cdc26         | CD26     | 68.56589277 | 40.25794015 | 33.86207083 | 26.08767206 | 35.97140888 | 52.24323197 | 70.02194754 | 18.99767441 | 20.89926226 | 22.22204793 |
| ENSMUSG00000047635  | -0.073322775 | 3.380954197  | 0.05556688  | 0.813645074 | 0.999071534 | 2810006K23Rik | 2810006K23Rik | C12orf65 | 13.96582667 | 10.07930755 | 9.088229746 | 9.921641237 | 11.83786365 | 12.80614043 | 12.74891282 | 7.115492597 | 7.306884924 | 9.084896066 |
| ENSMUSG00000004105  | -0.063640157 | 7.462237672  | 0.055545635 | 0.813680048 | 0.999071534 | Angptl2       | Angptl2       | ANGPTL2  | 188.9948303 | 236.0336668 | 137.1312888 | 164.3662104 | 211.1848714 | 268.492376  | 220.1614284 | 116.5420972 | 110.2318231 | 141.8943119 |
| ENSMUSG00000024401  | -0.171860402 | 0.214343602  | 0.055531074 | 0.813704022 | 0.999071534 | Tnf           | Tnf           | TNF      | 0.561440268 | 2.01586151  | 0.942483085 | 0.485674746 | 1.63506404  | 1.964578361 | 0.453007054 | 0.27632981  | 0.471411931 | 1.699333077 |
| ENSMUSG00000004267  | -0.12981139  | 6.329329137  | 0.055527553 | 0.813709819 | 0.999071534 | Eno2          | Eno2          | ENO2     | 56.9160072  | 148.7587214 | 80.24570265 | 56.82394526 | 94.96451944 | 8.513172898 | 17.60255983 | 183.1375813 | 51.30533178 | 94.18226785 |
| ENSMUSG00000018899  | 0.066988427  | 7.556887582  | 0.055526861 | 0.81371096  | 0.999071534 | Irf1          | Irf1          | IRF1     | 187.0999694 | 153.9169553 | 212.0586941 | 188.0255087 | 212.6891303 | 171.1366039 | 102.6384555 | 228.2484227 | 179.057965  | 233.789016  |
| ENSMUSG00000026094  | 0.05817694   | 6.280451545  | 0.05546877  | 0.813806641 | 0.999071534 | Stk17b        | Stk17b        | STK17B   | 113.8320144 | 93.3225299  | 61.66532183 | 65.35794437 | 61.93622583 | 97.93786941 | 105.2270672 | 53.53890061 | 59.24076594 | 70.97983545 |
| ENSMUSG00000033055  | -0.052703003 | 4.79492294   | 0.055406372 | 0.813909475 | 0.999071534 | Ankrd54       | Ankrd54       | ANKRD54  | 28.35273355 | 27.5105806  | 31.30390246 | 30.7362732  | 27.86149124 | 37.76356183 | 23.62108212 | 21.20831288 | 21.99922343 | 28.10435474 |
| ENSMUSG00000025044  | 0.101004453  | 7.112146029  | 0.055368224 | 0.813972377 | 0.999071534 | Msr1          | Msr1          | MSR1     | 200.9956161 | 170.9924881 | 90.3437357  | 108.1667041 | 125.5075157 | 256.341095  | 299.1788018 | 68.80612258 | 29.2257397  | 82.22157735 |
| ENSMUSG00000066363  | -0.173190189 | 0.890049633  | 0.055261389 | 0.814148651 | 0.999071534 | Serpina3f     | Serpina3f     | SERPINA3 | 2.947561409 | 3.379532531 | 1.413724627 | 0.693821065 | 1.046440986 | 2.983248622 | 2.200319978 | 0.621742072 | 0           | 2.483640651 |
| ENSMUSG00000023020  | -0.05904376  | 6.421443894  | 0.05523816  | 0.814187003 | 0.999071534 | Cox14         | Cox14         | COX14    | 106.3227508 | 71.91882387 | 82.46726992 | 110.2481673 | 80.64135845 | 58.64630219 | 106.5860884 | 71.36217332 | 73.77596714 | 87.58101244 |
| ENSMUSG00000024780  | 0.077673523  | 3.733744202  | 0.055153741 | 0.81432645  | 0.999071534 | Cdc37l1       | Cdc37l1       | CDC37L1  | 15.72032751 | 13.99245048 | 13.86796539 | 13.7376571  | 9.090956062 | 18.40882687 | 20.12645627 | 8.497141644 | 11.86386692 | 7.124127131 |
| ENSMUSG00000027598  | 0.052714591  | 5.582549043  | 0.055151334 | 0.814330428 | 0.999071534 | Itch          | Itch          | ITCH     | 38.38847835 | 62.72886698 | 46.92219358 | 36.63375226 | 59.7779413  | 59.81049677 | 40.64120431 | 52.50266382 | 43.44846627 | 38.75786595 |
| ENSMUSG000000041961 | 0.077247466  | 3.436005259  | 0.055100699 | 0.814414126 | 0.999071534 | Znrf3         | Znrf3         | ZNRF3    | 8.91286426  | 8.419186306 | 14.40652715 | 12.55816129 | 9.41796887  | 12.22404314 | 8.477703446 | 9.878790692 | 12.57098482 | 9.084896066 |
| ENSMUSG00000033233  | -0.086977993 | 2.690412869  | 0.054995923 | 0.814587444 | 0.999071534 | Trim45        | Trim45        | TRIM45   | 5.965302851 | 8.359896261 | 4.981696305 | 6.660862229 | 7.848307392 | 7.276216152 | 3.818022315 | 5.733843549 | 4.714119306 | 8.235229528 |
| ENSMUSG00000041935  | 0.066311324  | 5.907017229  | 0.054924025 | 0.814706477 | 0.999071534 | AW549877      | AW549877      | C5orf51  | 52.56484512 | 60.65371543 | 58.43395126 | 67.30064335 | 63.96370524 | 39.00051858 | 36.62885611 | 99.27148409 | 49.81252733 | 64.37858004 |
| ENSMUSG00000027459  | -0.061843992 | 4.321349285  | 0.054830398 | 0.814861609 | 0.999071534 | Fam110a       | Fam110a       | FAM110A  | 29.33525402 | 16.77908257 | 18.31109993 | 20.95339618 | 20.01318385 | 25.9033295  | 21.8737692  | 17.33969555 | 16.73512354 | 12.74499808 |
| ENSMUSG00000035621  | -0.057785278 | 6.407151765  | 0.054766741 | 0.814967162 | 0.999071534 | Midn          | Midn          | MIDN     | 87.93558203 | 92.55175932 | 80.71694419 | 69.79839919 | 119.8174928 | 129.3711232 | 53.71369359 | 101.9656997 | 50.28393926 | 76.40462951 |
| ENSMUSG00000053560  | -0.05467318  | 5.319262922  | 0.054764203 | 0.814971372 | 0.999071534 | Ier2          | Ier2          | IER2     | 49.75764378 | 39.48716958 | 50.55748548 | 29.41801318 | 42.11924967 | 52.97085359 | 25.95083269 | 36.06104015 | 38.02722907 | 35.94743048 |
| ENSMUSG00000033377  | 0.112315793  | 1.908380498  | 0.054721159 | 0.815042784 | 0.999071534 | Palmd         | Palmd         | PALMD    | 2.526481208 | 3.438822576 | 6.933982695 | 2.358991623 | 2.812310149 | 5.675448599 | 2.070889391 | 2.279720929 | 3.69272679  | 4.64048648  |
| ENSMUSG00000032094  | -0.132664647 | 1.318174658  | 0.054681081 | 0.815109302 | 0.999071534 | Cd3d          | Cd3d          | CD3D     | 6.807463254 | 1.897281421 | 1.615685288 | 1.040731598 | 1.63506404  | 2.473913492 | 1.747312924 | 1.657978857 | 2.357059653 | 2.548999616 |
| ENSMUSG00000081455  | 0.232239918  | 0.00145794   | 0.054564435 | 0.815303047 | 0.999071534 | Hmgb1-ps3     | Hmgb1-ps3     |          | 1.193606057 | 0.770770577 | 0.740522424 | 0.20814632  | 1.24264867  | 2.328389169 | 0.453007054 | 2.072473572 | 0           | 0           |
| ENSMUSG00000039007  | -0.066299442 | 6.19349806   | 0.05454892  | 0.815328834 | 0.999071534 | Cpq           | Cpq           | CPQ      | 54.8106062  | 118.5207988 | 60.52087809 | 67.99446442 | 86.8546018  | 46.7133077  | 73.25771222 | 102.8637716 | 48.08401692 | 69.4112203  |
| ENSMUSG00000025078  | -0.064417584 | 3.910061147  | 0.054537746 | 0.815347407 | 0.999071534 | Nhlrc2        | Nhlrc2        | NHLRC2   | 14.38690688 | 18.73565403 | 17.57057751 | 13.8070392  | 14.6501738  | 21.31931333 | 14.43151045 | 13.74740803 | 7.6997282   | 15.16327977 |
| ENSMUSG00000027284  | 0.073318289  | 4.011763521  | 0.05446723  | 0.81546467  | 0.999071534 | Cdan1         | Cdan1         | CDAN1    | 15.93086761 | 11.20581839 | 21.13854919 | 14.08456763 | 18.63973005 | 21.90141062 | 12.03704459 | 14.16190274 | 20.42785033 | 9.803844676 |
| ENSMUSG00000041842  | 0.085369226  | 3.220490698  | 0.054462119 | 0.815473172 | 0.999071534 | Fhdc1         | Fhdc1         | FHDC1    | 7.509263589 | 11.02794826 | 10.03071283 | 8.187088573 | 9.548773993 | 10.18670261 | 5.047792891 | 16.16529386 | 6.521198373 | 7.777716776 |
| ENSMUSG00000080776  | 0.204662596  | 0.013499375  | 0.054447812 | 0.815496974 | 0.999071534 | Gm12174       | Gm12174       |          | 0           | 0.296450222 | 1.009803305 | 1.110113705 | 1.765869163 | 0.800383777 | 1.747312924 | 1.174401691 | 0.15713731  | 0.71894861  |
| ENSMUSG00000035936  | -0.067424279 | 3.706206522  | 0.05440635  | 0.815565971 | 0.999071534 | Aldh5a1       | Aldh5a1       | ALDH5A1  | 11.79024564 | 11.79871884 | 11.915679   | 17.13738032 | 15.69661478 | 12.07851881 | 10.8721693  | 13.40199576 | 11.31388633 | 12.67963911 |
| ENSMUSG00000088951  | 0.214659939  | 0.593783696  | 0.0543458   | 0.815666783 | 0.999071534 | Gm14435       | Gm14435       |          | 2.596661241 | 1.363671021 | 0.336601102 | 0           | 2.419894779 | 1.382481069 | 1.747312924 | 3.039627905 | 0           | 1.111102397 |
| ENSMUSG00000058761  | -0.085540743 | 3.207041697  | 0.054321041 | 0.815708022 | 0.999071534 | Rnf169        | Rnf169        | RNF169   | 11.43934547 | 13.04380977 | 7.203263577 | 8.325852786 | 8.763943254 | 18.918162   | 7.44225875  | 7.806317121 | 4.871256616 | 5.882306805 |
| ENSMUSG00000067049  | 0.205205789  | 0.590424629  | 0.054201556 | 0.81590718  | 0.999071534 | Unc93a        | Unc93a        | UNC93A   | 0.701800335 | 0.592900444 | 1.615685288 | 2.497755836 | 1.177246109 | 1.309718907 | 0.129430587 | 3.108710358 | 2.278490998 | 0           |
| ENSMUSG00000097729  | -0.099044875 | 1.964470531  | 0.054186736 | 0.815931898 | 0.999071534 | 2310015A10Rik | 2310015A10Rik |          | 4.140621979 | 2.96450222  | 3.231370576 | 4.648601139 | 5.232204928 | 3.34705943  | 2.588611739 | 4.352194501 | 3.457020824 | 3.594743048 |
| ENSMUSG00000050565  | 0.058205348  | 6.918883269  | 0.054181688 | 0.815940319 | 0.999071534 | Tor1a1p2      | Tor1a1p2      | TOR1AIP2 | 97.12916642 | 153.2647648 | 119.15679   | 109.2074357 | 136.8221589 | 117.583653  | 85.94190974 | 159.9258773 | 107.1676456 | 118.4304437 |
| ENSMUSG00000023072  | 0.063213042  | 3.80889813   | 0.054160538 | 0.815975601 | 0.999071534 | Cep89         | Cep89         | CEP89    | 11.64988557 | 14.94109119 | 12.65620142 | 14.57024238 | 16.61225065 | 16.66253499 | 14.56094103 | 11.81309936 | 12.02100423 | 13.66002358 |
| ENSMUSG00000071723  | -0.209822538 | -0.588856807 | 0.054120887 | 0.81604177  | 0.999071534 | Gspt2         | Gspt2         | GSPT2    | 0.701800335 | 0.296450222 | 1.009803305 | 0.277528426 | 0.654025616 | 1.236956746 | 0.453007054 | 0.138164905 | 0           | 0.71894861  |
| ENSMUSG00000020850  | -0.05903806  | 7.251293751  | 0.054104972 | 0.816068334 | 0.999071534 | Prpf8         | Prpf8         | PRPF8    | 150.1852718 | 191.0325231 | 152.8169002 | 118.4352559 | 197.7773463 | 245.2812465 | 111.1161589 | 125.6609809 | 117.9315513 | 136.9923896 |
| ENSMUSG00000048027  | 0.056413274  | 4.657967825  | 0.054062418 | 0.816139387 | 0.999071534 | Rgmb          | Rgmb          | RGMB     | 24.98409194 | 34.09177553 | 22.75423448 | 16.9986161  | 29.69276296 | 32.81573485 | 21.74433861 | 24.31702324 | 22.47063536 | 22.87563758 |
| ENSMUSG00000032478  | 0.098242551  | 2.825889835  | 0.054047537 | 0.81616424  | 0.999071534 | Nme6          | Nme6          | NME6     | 8.211063924 | 6.699775018 | 5.99149961  | 6.105625376 | 7.979112515 | 9.386318836 | 12.74891282 | 6.079255811 | 4.949825271 | 2.156845829 |

|                     |              |              |             |             |             |               |               |          |             |             |             |             |             |             |             |             |             |             |
|---------------------|--------------|--------------|-------------|-------------|-------------|---------------|---------------|----------|-------------|-------------|-------------|-------------|-------------|-------------|-------------|-------------|-------------|-------------|
| ENSMUSG00000022296  | -0.23718861  | -0.62253498  | 0.054023276 | 0.816204766 | 0.999071534 | Baalc         | Baalc         | BAALC    | 1.403600671 | 0.355740266 | 0.269280881 | 0.346910533 | 0.523220493 | 0.800383777 | 1.100159989 | 0.483577167 | 0           | 0           |
| ENSMUSG00000075700  | 0.072069585  | 8.111421161  | 0.053979518 | 0.816277888 | 0.999071534 | Selt          | Selt          | SELT     | 332.2322788 | 319.039729  | 228.0135863 | 263.7907691 | 257.8823004 | 300.4349649 | 515.1337361 | 196.2632473 | 190.8432632 | 179.2142807 |
| ENSMUSG00000025525  | 0.054410711  | 4.941188896  | 0.053902656 | 0.816406401 | 0.999071534 | Apool         | Apool         | APOOL    | 33.96713623 | 23.24169741 | 29.48625651 | 34.82981749 | 34.00933203 | 25.75780518 | 33.84609849 | 31.70884565 | 23.64916518 | 34.44417429 |
| ENSMUSG00000036499  | 0.057332932  | 6.225341125  | 0.053894845 | 0.816419466 | 0.999071534 | Eea1          | Eea1          | EEA1     | 51.93322482 | 91.01021816 | 78.96661846 | 67.92508231 | 90.51714525 | 71.23415613 | 53.26068653 | 101.6202875 | 59.39790325 | 79.7379367  |
| ENSMUSG00000028019  | 0.05599206   | 5.120037934  | 0.053835457 | 0.816518837 | 0.999071534 | Pdgfc         | Pdgfc         | PDGFC    | 37.40595788 | 37.94562842 | 42.27709837 | 25.94890785 | 33.35530641 | 45.62187527 | 50.41321362 | 29.15279491 | 23.02061594 | 25.42463719 |
| ENSMUSG00000028832  | -0.073592591 | 7.771638118  | 0.053758747 | 0.816647278 | 0.999071534 | Stmn1         | Stmn1         | STMN1    | 292.4401998 | 107.5521406 | 243.2279561 | 275.7938735 | 239.9619985 | 267.6919922 | 316.3283545 | 126.8353826 | 134.6666748 | 202.6781489 |
| ENSMUSG00000003808  | 0.054561543  | 6.132678155  | 0.053742473 | 0.816674537 | 0.999071534 | Farsa         | Farsa         | FARSA    | 89.3391827  | 59.4086245  | 68.06074277 | 60.57057902 | 80.51055332 | 114.3821179 | 75.52274749 | 42.90020294 | 48.94827213 | 73.00596335 |
| ENSMUSG00000039530  | 0.059813156  | 6.780709483  | 0.05371862  | 0.816714503 | 0.999071534 | Tusc3         | Tusc3         | TUSC3    | 113.7618344 | 129.4301669 | 74.32152326 | 126.2754339 | 113.6696521 | 101.0666424 | 169.8129301 | 91.05067226 | 82.96849978 | 95.81624196 |
| ENSMUSG00000059401  | -0.095766948 | 2.131609641  | 0.053638362 | 0.81684904  | 0.999071534 | Mamld1        | Mamld1        | MAMLD1   | 7.228543455 | 3.794562842 | 4.510454763 | 4.093544286 | 3.204725518 | 6.257545891 | 3.106334087 | 3.45412262  | 2.985608894 | 4.444409586 |
| ENSMUSG00000033392  | 0.051916787  | 5.318324216  | 0.053595779 | 0.816920466 | 0.999071534 | Clasp2        | Clasp2        | CLASP2   | 39.93243909 | 34.86254611 | 51.23068768 | 38.43768703 | 38.06429085 | 55.51752924 | 36.95243258 | 37.09727694 | 38.18436638 | 28.69258542 |
| ENSMUSG00000079283  | -0.06353703  | 4.342970932  | 0.053586527 | 0.816935987 | 0.999071534 | 2310009B15Rik | 2310009B15Rik | Clorf53  | 21.9663505  | 15.47470159 | 20.26338632 | 28.09975315 | 20.53640434 | 14.91624311 | 17.73199041 | 21.13923043 | 18.93504588 | 20.52271485 |
| ENSMUSG000000337465 | 0.055257482  | 6.006790361  | 0.053578115 | 0.816950102 | 0.999071534 | Klf10         | Klf10         | KLF10    | 56.00366677 | 89.23151683 | 53.92349649 | 49.67758829 | 79.3330722  | 76.18198311 | 52.48410301 | 84.97141644 | 51.54103774 | 51.24142817 |
| ENSMUSG00000026254  | 0.049410747  | 6.380121621  | 0.053574278 | 0.81695654  | 0.999071534 | Eif4e2        | Eif4e2        | EIF4E2   | 108.3579718 | 73.34178493 | 81.79406772 | 76.04278878 | 85.67735569 | 91.46203703 | 102.8326013 | 71.36217332 | 62.38351215 | 82.54837217 |
| ENSMUSG00000021417  | -0.047064287 | 5.803181608  | 0.053554243 | 0.816990163 | 0.999071534 | Eci2          | Eci2          | ECI2     | 57.82834764 | 68.00568093 | 51.90388988 | 56.40765262 | 59.90874642 | 53.77123736 | 61.99725115 | 57.96017756 | 39.52003351 | 51.50286403 |
| ENSMUSG000000053483 | -0.0555201   | 4.933904827  | 0.053521962 | 0.81704435  | 0.999071534 | Usp21         | Usp21         | USP21    | 29.05453389 | 28.39993127 | 32.91958775 | 28.09975315 | 42.96948297 | 39.50985371 | 20.51474803 | 31.36343339 | 18.85647722 | 36.40494323 |
| ENSMUSG000000056476 | -0.066327791 | 3.696783964  | 0.05351935  | 0.817048736 | 0.999071534 | Med12l        | Med12l        | MED12L   | 11.2989854  | 11.44297857 | 16.96469553 | 14.70900659 | 13.53833025 | 15.57110257 | 15.40223985 | 10.56961522 | 9.113963991 | 10.58815225 |
| ENSMUSG00000034401  | 0.064394272  | 5.018542561  | 0.053494765 | 0.817090018 | 0.999071534 | Spata6        | Spata6        | SPATA6   | 23.6506713  | 37.35272798 | 29.95749805 | 38.22954071 | 34.00933203 | 23.21112953 | 23.87994329 | 48.56496403 | 31.19175607 | 28.49650852 |
| ENSMUSG000000081865 | -0.113613935 | 1.425460087  | 0.053492143 | 0.817094421 | 0.999071534 | Gm15484       | Gm15484       |          | 3.438821644 | 2.786632087 | 2.625488593 | 2.636520049 | 2.289089656 | 2.255627007 | 3.365195261 | 0.898071881 | 2.514196963 | 2.679717545 |
| ENSMUSG00000032329  | 0.062740582  | 4.088542262  | 0.053463598 | 0.817142365 | 0.999071534 | Hmg20a        | Hmg20a        | HMG20A   | 16.00104765 | 17.25340292 | 14.33920693 | 17.55367296 | 20.6018069  | 20.44616739 | 12.9430587  | 21.13923043 | 10.05678785 | 19.80376624 |
| ENSMUSG00000040631  | 0.084970193  | 3.266308855  | 0.053456203 | 0.817154788 | 0.999071534 | Dok4          | Dok4          | DOK4     | 11.7200656  | 9.54569715  | 9.559471289 | 7.007592761 | 10.20279961 | 16.73529715 | 12.16647517 | 11.12227484 | 3.8498641   | 5.359435089 |
| ENSMUSG00000022623  | -0.088219329 | 2.795966788  | 0.053419953 | 0.817215698 | 0.999071534 | Shank3        | Shank3        | SHANK3   | 6.456563086 | 6.284744707 | 9.559471289 | 7.076974868 | 6.998074091 | 8.222124252 | 3.688771728 | 4.352194501 | 7.6997282   | 7.646998847 |
| ENSMUSG000000001943 | -0.227594292 | -0.157628571 | 0.053417172 | 0.817220372 | 0.999071534 | Vsig2         | Vsig2         | VSIG2    | 0.561440268 | 1.778701332 | 0           | 0.971349492 | 0.981038424 | 0.727621615 | 0.776583522 | 0.414494714 | 1.335667137 | 0           |
| ENSMUSG000000071042 | -0.078441598 | 3.028331159  | 0.053411132 | 0.817230524 | 0.999071534 | Rasgrp3       | Rasgrp3       | RASGRP3  | 6.456563086 | 9.664277238 | 10.03071283 | 7.146356975 | 9.548773993 | 12.22404314 | 7.959981098 | 6.35558562  | 6.435550651 | 7.646998847 |
| ENSMUSG000000007610 | 0.070756763  | 4.515063129  | 0.053410794 | 0.817231091 | 0.999071534 | Gtbp3         | Gtbp3         | GTPBP3   | 32.56353556 | 25.85045936 | 16.2241731  | 13.18260024 | 28.38471173 | 34.4165024  | 33.26366085 | 15.88896405 | 16.81369219 | 14.64040805 |
| ENSMUSG000000058070 | -0.049045223 | 6.442519624  | 0.053395921 | 0.817256091 | 0.999071534 | Eml1          | Eml1          | EML1     | 98.81348723 | 103.6982877 | 84.89079785 | 73.89194347 | 98.75786801 | 110.5257234 | 84.97118034 | 61.69062999 | 70.71178959 | 88.16924312 |
| ENSMUSG000000035086 | 0.050167057  | 6.922311312  | 0.053392503 | 0.817261837 | 0.999071534 | Becn1         | Becn1         | BECN1    | 131.9384631 | 118.5800888 | 113.5018915 | 131.8953845 | 121.3217518 | 143.5597447 | 130.5954622 | 102.5874418 | 93.33956226 | 129.4761087 |
| ENSMUSG000000043155 | 0.187407037  | 0.41966767   | 0.053390745 | 0.817264792 | 0.999071534 | Hpdl          | Hpdl          | HPDL     | 1.684320805 | 0.415030311 | 0           | 2.081463196 | 1.63506404  | 1.600767553 | 1.812028217 | 0.27632981  | 1.021392516 | 1.568615148 |
| ENSMUSG000000044201 | -0.071288318 | 4.01267735   | 0.053381029 | 0.817281126 | 0.999071534 | Cdc25c        | Cdc25c        | CDC25C   | 17.75554849 | 8.834216617 | 20.59998742 | 20.05142879 | 17.59328907 | 21.46483765 | 17.27898336 | 8.842553906 | 13.51380868 | 15.16327977 |
| ENSMUSG000000054455 | -0.055747249 | 6.329119191  | 0.053368843 | 0.817301613 | 0.999071534 | Vapb          | Vapb          | VAPB     | 98.39240703 | 105.476989  | 66.04113616 | 68.96581391 | 87.57402998 | 105.2868477 | 110.7278671 | 63.4176913  | 43.84130954 | 66.40470794 |
| ENSMUSG000000045251 | -0.082998572 | 2.99288404   | 0.053340923 | 0.817348565 | 0.999071534 | Zfp688        | Zfp688        | ZNF688   | 8.491784059 | 10.31646773 | 9.76143195  | 6.730064335 | 6.54025616  | 5.23887563  | 6.730390522 | 8.428059192 | 5.814080477 | 9.999921569 |
| ENSMUSG000000046470 | 0.076294506  | 3.829749091  | 0.05334054  | 0.817349211 | 0.999071534 | Sox18         | Sox18         | SOX18    | 8.491784059 | 12.09516906 | 18.64770103 | 12.6969255  | 19.29375567 | 23.64770249 | 14.8845175  | 7.460904859 | 9.585375922 | 16.47045906 |
| ENSMUSG000000064090 | -0.112568431 | 3.497049057  | 0.053333337 | 0.817361325 | 0.999071534 | Vrk2          | Vrk2          | VRK2     | 23.51031124 | 15.41541155 | 2.760129034 | 8.603381212 | 10.39900729 | 13.02442691 | 21.35604685 | 9.257048621 | 5.028393926 | 4.379050622 |
| ENSMUSG000000022246 | 0.052992431  | 6.884270926  | 0.053322979 | 0.817378749 | 0.999071534 | Rai14         | Rai14         | RAI14    | 129.8330621 | 152.7904444 | 105.8947066 | 87.35207215 | 128.450631  | 143.6325068 | 141.9853539 | 107.0087188 | 80.21859685 | 114.9664186 |
| ENSMUSG000000048706 | -0.065340146 | 4.46255959   | 0.053304949 | 0.817409081 | 0.999071534 | Lurap1l       | Lurap1l       | LURAP1L  | 16.70284798 | 20.75151554 | 29.82285761 | 26.36520049 | 22.17146838 | 32.96125917 | 19.22044216 | 11.05319238 | 16.89226085 | 25.55535512 |
| ENSMUSG000000032058 | -0.055470348 | 4.998484558  | 0.053268352 | 0.817470666 | 0.999071534 | Ppp2r1b       | Ppp2r1b       | PPP2R1B  | 38.45865838 | 37.1155678  | 31.97710466 | 27.19778577 | 34.27094228 | 55.95410221 | 32.55179262 | 25.07693022 | 20.11357571 | 22.67956068 |
| ENSMUSG000000038195 | 0.197546527  | -0.157184758 | 0.053261177 | 0.817482743 | 0.999071534 | Rilp          | Rilp          | RILP     | 0.140360067 | 0.355740266 | 0.875162864 | 1.942698983 | 0.261610246 | 1.091432423 | 1.68259763  | 0.690824524 | 0.15713731  | 0.457512752 |
| ENSMUSG000000071324 | 0.106278239  | 1.964744635  | 0.053207287 | 0.817573475 | 0.999071534 | Armc2         | Armc2         | ARMC2    | 4.56170218  | 3.023792265 | 3.769932339 | 2.22022741  | 5.428412612 | 2.255627007 | 2.588611739 | 5.18118393  | 3.378452169 | 5.032640267 |
| ENSMUSG000000051000 | 0.067120812  | 3.911080996  | 0.05315957  | 0.817653855 | 0.999071534 | Fam160a1      | Fam160a1      | FAM160A1 | 12.07096577 | 19.20997439 | 15.61829112 | 12.55816129 | 16.28523784 | 17.82672957 | 11.45460695 | 18.92859196 | 8.406846095 | 18.10443317 |
| ENSMUSG000000025184 | 0.07094394   | 3.694032551  | 0.053114092 | 0.817730499 | 0.999071534 | R3hcc1l       | R3hcc1l       | R3HCC1L  | 14.59744698 | 17.54985314 | 8.213066882 | 9.435966491 | 15.43500454 | 15.93491337 | 10.35444696 | 16.02712896 | 10.68533709 | 10.58815225 |

|                     |              |              |             |             |             |               |               |          |             |             |             |             |             |             |             |             |             |             |
|---------------------|--------------|--------------|-------------|-------------|-------------|---------------|---------------|----------|-------------|-------------|-------------|-------------|-------------|-------------|-------------|-------------|-------------|-------------|
| ENSMUSG00000036752  | 0.072571932  | 7.403793856  | 0.053109859 | 0.817737634 | 0.999071534 | Tubb4b        | Tubb4b        | TUBB4B   | 236.8576132 | 112.0581839 | 154.2306248 | 169.7086326 | 184.5006263 | 262.5258788 | 285.0708678 | 103.692761  | 98.44652484 | 116.012162  |
| ENSMUSG000000041702 | 0.107196149  | 3.158321817  | 0.053087834 | 0.817774766 | 0.999071534 | Btdb7         | Btdb7         | BTBD7    | 11.7200656  | 18.73565403 | 3.702612119 | 3.81601586  | 6.409451036 | 18.77263767 | 9.189571674 | 8.220811835 | 4.792687961 | 5.359435089 |
| ENSMUSG000000020892 | 0.178806984  | 0.322811037  | 0.053071858 | 0.817801706 | 0.999071534 | Alox e3       | Alox e3       | ALOXE3   | 1.122880537 | 0.415030311 | 0.740522424 | 2.636520049 | 0.457817931 | 0.582097292 | 0.19414588  | 1.243484143 | 1.492804447 | 2.0261279   |
| ENSMUSG000000098905 | 0.138685366  | 1.0670604    | 0.053047794 | 0.817842292 | 0.999071534 | Zfp953        | Zfp953        |          | 0.561440268 | 2.371601776 | 1.346404407 | 2.775284262 | 2.550699902 | 2.910486461 | 4.012348196 | 0.759906976 | 1.257098482 | 1.241820326 |
| ENSMUSG000000051977 | 0.111511478  | 2.067475133  | 0.053036015 | 0.81786216  | 0.999071534 | Prdm9         | Prdm9         | PRDM7    | 3.438821644 | 2.786632087 | 3.837252559 | 4.856747458 | 5.297607489 | 2.182864846 | 1.68259763  | 5.595678644 | 4.871256616 | 5.22871716  |
| ENSMUSG000000032184 | 0.072095205  | 4.300500237  | 0.053034533 | 0.817864661 | 0.999071534 | Lysmd2        | Lysmd2        | LYSMD2   | 21.82599043 | 12.39161928 | 26.59148704 | 22.61856673 | 15.17339429 | 25.75780518 | 13.33135046 | 11.53676955 | 23.57059653 | 21.89525311 |
| ENSMUSG000000063802 | -0.06606314  | 4.960540418  | 0.053032534 | 0.817868034 | 0.999071534 | Hspbp1        | Hspbp1        | HSPBP1   | 32.6337156  | 22.2930567  | 35.81435722 | 33.51155746 | 40.3533805  | 41.40166991 | 38.95860667 | 12.9184186  | 18.77790857 | 37.90819941 |
| ENSMUSG000000056025 | 0.103232772  | 3.188169624  | 0.05288701  | 0.818113715 | 0.999071534 | C1ca1         | C1ca1         | C1ca3a1  | 8.491784059 | 5.217523908 | 13.19476319 | 11.86434022 | 5.820827982 | 6.184783729 | 3.041618794 | 9.326131073 | 10.21392516 | 14.77112598 |
| ENSMUSG000000031129 | -0.105861763 | 2.440365007  | 0.052871241 | 0.818140357 | 0.999071534 | Slc9a9        | Slc9a9        | SLC9A9   | 6.596923153 | 4.565333419 | 5.520258068 | 5.064893778 | 6.801866406 | 8.731459383 | 9.642578728 | 2.832380548 | 1.492804447 | 3.202589261 |
| ENSMUSG000000002580 | 0.057398439  | 6.363396939  | 0.052808474 | 0.818246451 | 0.999071534 | Mien1         | Mien1         | MIEN1    | 107.8667116 | 71.0294732  | 73.37904107 | 80.69138992 | 85.80816081 | 52.3887563  | 102.5737402 | 87.80379699 | 64.11202256 | 91.76398616 |
| ENSMUSG000000020875 | -0.14861587  | 0.597636695  | 0.052753268 | 0.818339819 | 0.999071534 | Hoxb9         | Hoxb9         | HOXB9    | 2.38612114  | 0.830060622 | 1.817645949 | 1.179495811 | 1.373453794 | 0.582097292 | 1.100159989 | 2.348803381 | 1.571373102 | 0.457512752 |
| ENSMUSG000000020630 | 0.066696055  | 3.629681006  | 0.052723038 | 0.818390968 | 0.999071534 | Rnaseh1       | Rnaseh1       | RNASEH1  | 16.00104765 | 9.54569715  | 12.92548231 | 11.37866547 | 12.36108414 | 16.29872418 | 15.20809397 | 10.1551205  | 8.406846095 | 11.43781879 |
| ENSMUSG000000072809 | -0.164885244 | 0.438862929  | 0.052712646 | 0.818408553 | 0.999071534 | 9330160F10Rik | 9330160F10Rik |          | 1.614140771 | 0.237160178 | 1.346404407 | 2.705902155 | 0.719428178 | 1.164194584 | 0.323576467 | 1.036236786 | 0.942823861 | 2.091486864 |
| ENSMUSG000000006445 | 0.054533277  | 6.374276751  | 0.052648276 | 0.81851753  | 0.999071534 | Epha2         | Epha2         | EPHA2    | 77.47875703 | 99.66656465 | 81.25550595 | 65.42732648 | 99.67350387 | 126.2423502 | 102.3795943 | 74.33271878 | 40.0700141  | 78.6268343  |
| ENSMUSG000000040842 | -0.056209828 | 6.190918306  | 0.052616661 | 0.818571078 | 0.999071534 | Szrd1         | Szrd1         | SZRD1    | 85.47928085 | 91.06950821 | 66.44505748 | 61.26440008 | 83.25746091 | 113.8727828 | 95.39034259 | 48.91037629 | 41.71995586 | 57.25445291 |
| ENSMUSG000000067547 | -0.184213706 | 5.525546383  | 0.052517942 | 0.818738394 | 0.999071534 | Gm7666        | Gm7666        |          | 96.77826625 | 48.55854637 | 17.70521795 | 26.57334681 | 67.29923588 | 69.92443722 | 119.7232929 | 21.20831288 | 0           | 11.37245982 |
| ENSMUSG000000072704 | 0.046962317  | 5.994800125  | 0.052504803 | 0.818760676 | 0.999071534 | 2700089E24Rik | Smim10L1      | SMIM10L1 | 58.88104814 | 60.89087561 | 73.04243907 | 64.73350541 | 67.1030282  | 71.52520478 | 76.94648395 | 58.37467227 | 48.79113482 | 58.16947841 |
| ENSMUSG000000073609 | 0.084123688  | 2.816014334  | 0.052491788 | 0.81878275  | 0.999071534 | D2hgdh        | D2hgdh        | D2HGDH   | 7.579443623 | 9.664277238 | 5.385617627 | 4.371072713 | 8.044515076 | 8.076599929 | 9.060141087 | 4.973936572 | 4.714119306 | 7.908434705 |
| ENSMUSG000000059708 | 0.097894167  | 2.160217723  | 0.052447806 | 0.818857367 | 0.999071534 | Akap17b       | Akap17b       |          | 2.877381375 | 4.091013064 | 4.375814322 | 4.440454819 | 5.951633105 | 4.29296753  | 3.041618794 | 4.352194501 | 5.971217787 | 3.398666154 |
| ENSMUSG000000036636 | -0.049413699 | 5.079444551  | 0.052431188 | 0.818885568 | 0.999071534 | C1cn7         | C1cn7         | CLCN7    | 38.59901845 | 37.29343793 | 37.09344141 | 32.26267955 | 32.76668336 | 51.37008603 | 30.86919499 | 28.8764651  | 21.68494881 | 31.306944   |
| ENSMUSG000000087177 | 0.105441182  | 2.527104354  | 0.052327884 | 0.819060985 | 0.999071534 | E130307A14Rik | E130307A14Rik |          | 4.842422314 | 5.395394041 | 3.90457278  | 8.256470679 | 5.559217736 | 4.365729691 | 2.070889391 | 8.289894287 | 3.335589479 | 9.738485711 |
| ENSMUSG000000050017 | 0.052393256  | 6.655644927  | 0.052265955 | 0.819166233 | 0.999071534 | Pitpnb        | Pitpnb        | PITPNB   | 117.7620963 | 89.5872571  | 114.5116948 | 100.3265261 | 90.71335293 | 133.9551394 | 128.8481493 | 76.26702744 | 83.20420575 | 78.16932155 |
| ENSMUSG000000097162 | -0.171830693 | 0.602621933  | 0.052150466 | 0.819362679 | 0.999071534 | 2310010J17Rik | 2310010J17Rik |          | 0.140360067 | 1.778701332 | 3.029409915 | 1.595788451 | 1.046440986 | 0.363810808 | 1.229590576 | 0.483577167 | 2.199922343 | 1.633974113 |
| ENSMUSG000000029312 | -0.106124764 | 2.113045484  | 0.052142644 | 0.819375992 | 0.999071534 | Klhl8         | Klhl8         | KLHL8    | 3.789721811 | 3.972432975 | 3.231370576 | 5.550568524 | 5.951633105 | 4.220205368 | 7.765835218 | 3.661369977 | 1.335667137 | 2.941153403 |
| ENSMUSG000000042496 | -0.118188862 | 1.085033339  | 0.052132742 | 0.819392847 | 0.999071534 | Prdm10        | Prdm10        | PRDM10   | 2.947561409 | 2.253021687 | 2.692808814 | 1.318260024 | 1.569661478 | 2.546675653 | 2.9769035   | 1.312566595 | 1.335667137 | 1.176461361 |
| ENSMUSG000000021892 | -0.072492356 | 3.46910875   | 0.052129144 | 0.819398973 | 0.999071534 | Sh3bp5        | Sh3bp5        | SH3BP5   | 8.421604025 | 15.17825137 | 11.04051614 | 10.96237283 | 12.62269439 | 14.11585934 | 12.29590576 | 7.184575049 | 6.678335683 | 12.28748533 |
| ENSMUSG000000047712 | -0.060960873 | 4.308038593  | 0.052098789 | 0.819450655 | 0.999071534 | Ust           | Ust           | UST      | 13.75528657 | 28.16277109 | 22.75423448 | 15.33344555 | 24.59136316 | 21.24655116 | 16.24353866 | 21.27739534 | 14.92804447 | 19.47697142 |
| ENSMUSG000000032725 | -0.107137272 | 3.892120176  | 0.05209781  | 0.819452322 | 0.999071534 | Folr2         | Folr2         | FOLR2    | 16.00104765 | 14.76322106 | 12.2522801  | 21.50845303 | 14.19235587 | 17.68120525 | 33.32837614 | 8.911636359 | 1.649941757 | 9.999921569 |
| ENSMUSG000000028607 | 0.060766136  | 4.393198261  | 0.052077558 | 0.819486812 | 0.999071534 | Cpt2          | Cpt2          | CPT2     | 25.96661241 | 23.41956754 | 15.2143698  | 18.52502245 | 23.28331193 | 20.88274036 | 16.17882337 | 19.41216912 | 24.6705577  | 19.67304832 |
| ENSMUSG000000026547 | -0.060340294 | 8.79125351   | 0.052070306 | 0.819499166 | 0.999071534 | Tagln2        | Tagln2        | TAGLN2   | 496.1026571 | 502.068096  | 491.8415298 | 320.0596575 | 550.035543  | 592.356757  | 418.4490876 | 493.1105452 | 251.7339709 | 384.5067882 |
| ENSMUSG000000018697 | -0.049559187 | 5.997223486  | 0.052027173 | 0.819572653 | 0.999071534 | Aatf          | Aatf          | AATF     | 54.88078623 | 54.78400103 | 80.51498353 | 74.23885401 | 71.09258445 | 84.84068033 | 57.27303473 | 49.73936572 | 50.67678254 | 63.59427246 |
| ENSMUSG000000074489 | -0.148732163 | 0.307638717  | 0.052013466 | 0.819596013 | 0.999071534 | Bglap3        | Bglap3        | BGLAP    | 0.842160403 | 1.422961066 | 2.423527932 | 0.485674746 | 0.850233301 | 1.018670261 | 1.164875283 | 1.381649048 | 0.471411931 | 1.045743432 |
| ENSMUSG000000036099 | 0.051801468  | 5.345863173  | 0.051924883 | 0.819747057 | 0.999071534 | Vezt          | Vezt          | VEZT     | 36.70415754 | 40.08007002 | 39.44964912 | 38.43768703 | 52.25664672 | 35.07136185 | 42.6473784  | 52.70991118 | 30.95605011 | 36.33958426 |
| ENSMUSG000000086247 | -0.199996893 | -0.323265093 | 0.051912656 | 0.819767916 | 0.999071534 | Gm15787       | Gm15787       |          | 0.561440268 | 0.770770577 | 1.481044488 | 0.20814632  | 0.719428178 | 0.582097292 | 0.647152935 | 0.552659619 | 1.099961171 | 0           |
| ENSMUSG000000031596 | -0.096191376 | 3.381592083  | 0.051865464 | 0.819848448 | 0.999071534 | Slc7a2        | Slc7a2        | SLC7A2   | 7.860163757 | 15.65257172 | 13.93528561 | 11.17051915 | 6.344048475 | 13.6065242  | 2.588611739 | 10.91502748 | 11.94243557 | 8.496665386 |
| ENSMUSG000000063049 | -0.05969714  | 4.218843844  | 0.051864405 | 0.819850257 | 0.999071534 | Ing2          | Ing2          | ING2     | 25.89643238 | 21.81873634 | 16.49345398 | 18.38625824 | 15.5004071  | 21.39207549 | 18.57328923 | 17.2706131  | 10.60676844 | 20.91486864 |
| ENSMUSG000000019843 | -0.050003891 | 6.190420503  | 0.051834266 | 0.819901709 | 0.999071534 | Fyn           | Fyn           | FYN      | 59.37230838 | 89.11293674 | 76.67773097 | 70.83913079 | 89.27449658 | 83.89477224 | 63.87399466 | 86.97480756 | 51.77674371 | 61.56814456 |
| ENSMUSG000000097062 | -0.098162444 | 1.715872173  | 0.051833551 | 0.819902929 | 0.999071534 | Gm17586       | Gm17586       |          | 3.859901845 | 3.260952442 | 2.760129034 | 3.260959008 | 3.793348573 | 3.274297269 | 4.012348196 | 3.039627905 | 2.042785033 | 2.418281687 |
| ENSMUSG000000054057 | -0.087451151 | 2.377304233  | 0.051803379 | 0.819954454 | 0.999071534 | A930004D18Rik | A930004D18Rik |          | 5.193322482 | 6.403324796 | 3.298690797 | 4.926129565 | 7.325086899 | 6.039259406 | 5.306654065 | 4.283112048 | 3.928432755 | 4.313691657 |

|                    |              |              |             |             |             |               |               |          |             |             |             |             |             |             |             |             |             |             |
|--------------------|--------------|--------------|-------------|-------------|-------------|---------------|---------------|----------|-------------|-------------|-------------|-------------|-------------|-------------|-------------|-------------|-------------|-------------|
| ENSMUSG00000063455 | 0.082692141  | 3.144796653  | 0.051751085 | 0.820043796 | 0.999071534 | D630045J12Rik | D630045J12Rik | KIAA1549 | 9.193584394 | 4.328173242 | 8.347707322 | 9.505348597 | 12.55729183 | 10.55051342 | 8.412988152 | 6.010173358 | 9.428238612 | 8.627383315 |
| ENSMUSG00000022023 | 0.045351505  | 5.816107727  | 0.051724574 | 0.820089106 | 0.999071534 | Wbp4          | Wbp4          | WBP4     | 52.56484512 | 54.30968068 | 58.77055236 | 62.44389589 | 58.46989007 | 62.72098323 | 50.93093597 | 61.48338263 | 43.29132896 | 57.97340152 |
| ENSMUSG00000056204 | -0.05528517  | 4.943667398  | 0.051716064 | 0.820103653 | 0.999071534 | Pgpep1        | Pgpep1        | PGPEP1   | 35.86199714 | 31.2458534  | 34.26599215 | 20.67586775 | 41.07280868 | 24.9574214  | 27.63343032 | 36.06104015 | 25.77051887 | 28.75794438 |
| ENSMUSG00000050605 | 0.102657292  | 2.344082557  | 0.051688471 | 0.820151083 | 0.999071534 | Zfp61         | Zfp61         |          | 3.017741442 | 3.675982753 | 7.943786    | 3.746633754 | 6.409451036 | 4.947826984 | 3.753487022 | 2.417885834 | 6.521198373 | 6.53589645  |
| ENSMUSG00000024395 | 0.154900485  | 2.234847981  | 0.051552185 | 0.820384036 | 0.999071534 | Lims2         | Lims2         | LIMS2    | 2.035220973 | 10.31646773 | 4.308494102 | 3.607869541 | 2.158284533 | 2.037340523 | 1.876743511 | 16.09621141 | 0.942823861 | 2.0261279   |
| ENSMUSG00000035722 | 0.06788935   | 4.791300472  | 0.051541802 | 0.820401818 | 0.999071534 | Abca7         | Abca7         | ABCA7    | 24.42265167 | 26.68051998 | 29.21697563 | 24.56126572 | 35.05577302 | 19.64578361 | 14.69037162 | 33.36682451 | 22.3920667  | 43.92122415 |
| ENSMUSG00000062933 | 0.198855053  | 7.670398625  | 0.051533547 | 0.820415955 | 0.999071534 | Gm10123       | Gm10123       |          | 282.7553551 | 313.4071747 | 79.97642177 | 103.6568672 | 215.1744277 | 363.7380454 | 579.3313072 | 105.6270697 | 0           | 78.03860362 |
| ENSMUSG00000030733 | 0.053518409  | 4.966725377  | 0.051503072 | 0.820468156 | 0.999071534 | Sh2b1         | Sh2b1         | SH2B1    | 34.9496567  | 32.07591402 | 28.1398521  | 27.82222473 | 36.03681144 | 31.94258891 | 20.19117157 | 35.50838053 | 27.49902928 | 36.92781495 |
| ENSMUSG00000048644 | -0.059549703 | 4.460579335  | 0.051464315 | 0.820534568 | 0.999071534 | Ctxn1         | Ctxn1         | CTXN1    | 21.26455016 | 21.46299608 | 29.21697563 | 20.74524986 | 23.28331193 | 22.99284304 | 14.30207986 | 25.35326003 | 13.67094599 | 27.84291888 |
| ENSMUSG00000027204 | 0.070620235  | 5.049318448  | 0.051416199 | 0.820617054 | 0.999071534 | Fbn1          | Fbn1          | FBN1     | 35.44091694 | 52.4716893  | 36.89148075 | 17.76181928 | 25.50699902 | 58.86458867 | 46.46558072 | 25.28417758 | 15.16375043 | 24.96712444 |
| ENSMUSG00000058656 | -0.348836244 | -1.171674206 | 0.05141125  | 0.82062554  | 0.999071534 | Samd12        | Samd12        | SAMD12   | 1.19306057  | 0.355740266 | 0           | 0           | 0.261610246 | 0.072762162 | 1.229590576 | 0           | 0           | 0           |
| ENSMUSG00000085939 | 0.123724688  | 1.438607307  | 0.051396431 | 0.820650954 | 0.999071534 | Cd63-ps       | Cd63-ps       |          | 1.333420637 | 3.438822576 | 1.95228639  | 2.358991623 | 3.727946011 | 1.382481069 | 3.365195261 | 5.043019025 | 1.492804447 | 1.503256184 |
| ENSMUSG00000035713 | -0.084381803 | 3.385043296  | 0.051303674 | 0.820810114 | 0.999071534 | Usp35         | Usp35         | USP35    | 11.5095255  | 10.25717768 | 12.31960032 | 11.23990126 | 9.679579116 | 5.893735083 | 4.983077598 | 14.16190274 | 11.07818037 | 10.45743432 |
| ENSMUSG00000038718 | 0.06707529   | 3.764982823  | 0.051293641 | 0.820827339 | 0.999071534 | Pbx3          | Pbx3          | PBX3     | 13.05348624 | 11.73942879 | 19.25358302 | 11.17051915 | 13.08051232 | 18.99092416 | 10.41916225 | 13.74740803 | 13.27810271 | 10.32671639 |
| ENSMUSG00000057605 | 0.196338359  | 0.081395773  | 0.051254797 | 0.820894043 | 0.999071534 | Gm6807        | Gm6807        |          | 0.912340436 | 1.245090933 | 0.403921322 | 0.485674746 | 1.438856355 | 0.291048646 | 1.29430587  | 2.556050739 | 0           | 0.588230681 |
| ENSMUSG00000021697 | -0.114472073 | 2.827765175  | 0.051247882 | 0.82090592  | 0.999071534 | Depdc1b       | Depdc1b       | DEPDC1B  | 10.6673651  | 4.683913508 | 7.80914556  | 5.064893778 | 9.614176555 | 16.73529715 | 8.412988152 | 1.243484143 | 4.792687961 | 3.202589261 |
| ENSMUSG00000029762 | -0.050248424 | 5.790199703  | 0.051242862 | 0.820914544 | 0.999071534 | Akr1b8        | Akr1b8        | AKR1B10  | 56.63528707 | 42.62954193 | 72.84047841 | 57.1708558  | 62.00162839 | 56.82724815 | 40.64120431 | 53.67706551 | 46.35550651 | 63.39819557 |
| ENSMUSG00000025158 | -0.066589688 | 4.419461432  | 0.05124279  | 0.820914667 | 0.999071534 | Rfng          | Rfng          | RFNG     | 18.10644865 | 21.2258359  | 23.76403778 | 25.81014364 | 23.61032474 | 20.00959442 | 9.319002261 | 23.34986891 | 21.13496822 | 24.83640651 |
| ENSMUSG00000004897 | -0.061555853 | 9.035116367  | 0.051229557 | 0.8209374   | 0.999071534 | Hdgf          | Hdgf          | HDGFL1   | 499.7520189 | 424.1016876 | 765.4982255 | 540.2090816 | 546.3729996 | 667.8111185 | 385.897295  | 421.6792894 | 507.7892199 | 495.2248741 |
| ENSMUSG00000031826 | 0.070026807  | 5.130476639  | 0.051215155 | 0.820962144 | 0.999071534 | Usp10         | Usp10         | USP10    | 40.00261912 | 34.21035562 | 30.15945871 | 33.99723221 | 38.6529139  | 75.09055069 | 42.90623958 | 14.71456236 | 16.49941757 | 34.05202051 |
| ENSMUSG00000068747 | 0.166677363  | 0.622545478  | 0.05120259  | 0.820983736 | 0.999071534 | Sort1         | Sort1         | SORT1    | 2.105401006 | 1.837991377 | 1.88496617  | 0.277528426 | 0.784830739 | 4.365729691 | 1.553167044 | 0.345412262 | 0.235705965 | 1.372538255 |
| ENSMUSG00000034903 | 0.061892218  | 5.104497753  | 0.051184784 | 0.821014337 | 0.999071534 | Cobl1         | Cobl1         | COBL1    | 25.26481208 | 38.00491846 | 40.93069397 | 30.80565531 | 39.11073183 | 27.64962138 | 20.06174098 | 43.17653275 | 37.32011117 | 36.33958426 |
| ENSMUSG00000002847 | 0.092136757  | 3.729047227  | 0.051090132 | 0.821177105 | 0.999071534 | Pla1a         | Pla1a         | PLA1A    | 16.56248792 | 20.87009563 | 11.51175768 | 8.04832436  | 9.352566308 | 18.84539983 | 25.95083269 | 9.80970824  | 3.355589479 | 10.06528053 |
| ENSMUSG00000031782 | 0.074997803  | 4.372338736  | 0.05102744  | 0.821284999 | 0.999071534 | Coq9          | Coq9          | COQ9     | 27.22985301 | 27.62916069 | 11.5790779  | 12.90507182 | 25.63780415 | 24.0115133  | 35.26983495 | 18.51409724 | 8.721120716 | 17.90835627 |
| ENSMUSG00000046314 | -0.143412067 | 0.693600325  | 0.051023009 | 0.821292628 | 0.999071534 | Stxbp6        | Stxbp6        | STXBP6   | 0.912340436 | 2.430891821 | 1.279084186 | 1.942698983 | 1.504258917 | 1.746291877 | 0.906014109 | 0.483577167 | 2.671334273 | 0.784307574 |
| ENSMUSG00000024959 | 0.057313479  | 5.336163374  | 0.050969394 | 0.82138496  | 0.999071534 | Bad           | Bad           | BAD      | 54.74042616 | 34.38822576 | 29.14965541 | 42.25370289 | 44.60454701 | 43.43901043 | 63.16212644 | 30.67260886 | 25.61338156 | 37.64676355 |
| ENSMUSG00000027242 | 0.120761065  | 2.631981656  | 0.050964822 | 0.821392836 | 0.999071534 | Wdr76         | Wdr76         | WDR76    | 11.0884453  | 7.114805329 | 3.567971678 | 4.787365352 | 3.727946011 | 15.93491337 | 8.865995207 | 4.835771668 | 1.178529826 | 2.352922722 |
| ENSMUSG00000066491 | 0.060957263  | 6.275145301  | 0.050960196 | 0.821400806 | 0.999071534 | Gm6265        | Gm6265        |          | 95.23430552 | 62.84744707 | 70.95551224 | 85.27060895 | 78.15606111 | 59.81049677 | 136.3551234 | 68.46071032 | 48.86970347 | 67.5811693  |
| ENSMUSG00000018442 | 0.04839449   | 5.995718923  | 0.050958167 | 0.821404302 | 0.999071534 | Derl2         | Derl2         | DERL2    | 64.28491072 | 54.84329108 | 69.20518651 | 73.1287403  | 62.59025145 | 60.24706974 | 75.06974044 | 66.94089637 | 46.51264382 | 63.5289135  |
| ENSMUSG00000015605 | -0.06069658  | 6.00809462   | 0.050925759 | 0.821460144 | 0.999071534 | Srf           | Srf           | SRF      | 71.51345418 | 78.08498848 | 77.21629273 | 43.50258081 | 72.00822032 | 128.4252151 | 57.98490296 | 47.80505706 | 29.85608894 | 56.60086326 |
| ENSMUSG00000023066 | 0.071977244  | 3.41722954   | 0.050919076 | 0.821471661 | 0.999071534 | Rtnn          | Rtnn          | RTTN     | 11.43934547 | 10.31646773 | 12.2522801  | 9.713494917 | 9.679579116 | 16.00767553 | 8.671849326 | 8.08264693  | 11.62816095 | 8.039152634 |
| ENSMUSG00000051627 | 0.173384579  | 0.327174455  | 0.050910098 | 0.821487136 | 0.999071534 | Hist1h1e      | Hist1h1e      | HIST1H1E | 0.631620302 | 2.193731643 | 0.269280881 | 0.901967385 | 1.504258917 | 0.436572969 | 0.388291761 | 2.763298096 | 1.257098482 | 0.653589645 |
| ENSMUSG00000033610 | 0.111826306  | 1.759951224  | 0.050887563 | 0.821525983 | 0.999071534 | Pank1         | Pank1         | PANK1    | 3.789721811 | 2.134441599 | 4.039213221 | 2.289609516 | 4.054958819 | 5.311637791 | 3.235764674 | 0.967154334 | 2.357059653 | 4.901922338 |
| ENSMUSG00000020882 | 0.090429062  | 3.423861809  | 0.050765055 | 0.821737329 | 0.999071534 | Cacnb1        | Cacnb1        | CACNB1   | 9.333944461 | 13.16238986 | 10.36731393 | 9.019673851 | 11.51085084 | 6.69411886  | 5.371369359 | 22.45179703 | 7.385453579 | 9.86920364  |
| ENSMUSG00000008429 | -0.057646118 | 4.852193768  | 0.050727572 | 0.821802046 | 0.999071534 | Herpud2       | Herpud2       | HERPUD2  | 25.05427197 | 38.06420851 | 27.73593078 | 27.75284262 | 33.74772178 | 27.86790786 | 22.71506801 | 40.06782239 | 24.27771443 | 19.86912521 |
| ENSMUSG00000025920 | -0.064847183 | 3.919999319  | 0.050719187 | 0.821816527 | 0.999071534 | Stau2         | Stau2         | STAU2    | 15.29924731 | 18.61707394 | 13.86796539 | 11.72557601 | 20.53640434 | 17.68120525 | 15.40223985 | 18.8595095  | 8.092571475 | 11.89533154 |
| ENSMUSG00000085615 | -0.16223118  | 0.416189571  | 0.050712153 | 0.821828675 | 0.999071534 | A330035P11Rik | A330035P11Rik |          | 2.245761073 | 1.363671021 | 0.807842644 | 0.624438959 | 1.569661478 | 1.600767553 | 1.48845175  | 0.967154334 | 0           | 1.633974113 |
| ENSMUSG00000031758 | -0.068719744 | 3.786166096  | 0.050701868 | 0.821846442 | 0.999071534 | Cdy12         | Cdy12         | CDYL2    | 9.474304528 | 17.60914319 | 12.45424076 | 14.8477708  | 18.18191212 | 15.4983404  | 9.06014087  | 14.02373784 | 9.113963991 | 17.25476663 |
| ENSMUSG00000031667 | -0.052993418 | 4.967718192  | 0.050693143 | 0.821861513 | 0.999071534 | Aktip         | Aktip         | AKTIP    | 37.54631794 | 35.45544656 | 27.39932968 | 29.20986686 | 35.57899351 | 30.99668081 | 39.47632902 | 30.11994924 | 16.1065743  | 32.81020018 |

|                     |              |              |             |             |             |               |               |          |             |             |             |             |             |             |             |             |             |             |
|---------------------|--------------|--------------|-------------|-------------|-------------|---------------|---------------|----------|-------------|-------------|-------------|-------------|-------------|-------------|-------------|-------------|-------------|-------------|
| ENSMUSG00000036617  | -0.073175447 | 4.11041456   | 0.050674403 | 0.821893891 | 0.999071534 | EtI4          | EtI4          | KIAA1217 | 13.61492651 | 11.73942879 | 24.57188042 | 20.88401407 | 20.01318385 | 21.24655116 | 7.959981098 | 13.33291331 | 15.32088774 | 23.00635551 |
| ENSMUSG000000020544 | 0.055981507  | 4.237457973  | 0.050601085 | 0.822020623 | 0.999071534 | Cox11         | Cox11         | COX11    | 21.1241901  | 19.03210425 | 17.83985839 | 18.73316877 | 18.63973005 | 18.26330254 | 23.23279036 | 16.99428329 | 13.67094599 | 20.13056107 |
| ENSMUSG000000020718 | 0.077011772  | 2.913227302  | 0.050562848 | 0.822086755 | 0.999071534 | Polg2         | Polg2         | POLG2    | 8.070703857 | 7.292675462 | 6.395420932 | 7.285121188 | 8.371527884 | 7.348978314 | 5.694945826 | 8.842553906 | 6.914041649 | 7.516280918 |
| ENSMUSG000000030725 | 0.116231697  | 2.357133348  | 0.050558733 | 0.822093873 | 0.999071534 | Lipt2         | Lipt2         | LIPT2    | 4.631882214 | 5.869714396 | 5.85685917  | 1.457024238 | 7.325086899 | 6.330308052 | 9.513148141 | 2.970545453 | 4.949825271 | 1.372538255 |
| ENSMUSG00000073684  | -0.056089294 | 4.632916299  | 0.050539637 | 0.822126911 | 0.999071534 | 2610002J02Rik | Faap20        |          | 30.87921476 | 23.65672772 | 23.56207712 | 31.29133005 | 20.73261203 | 29.61419974 | 21.74433861 | 16.92520084 | 19.72073243 | 29.67296989 |
| ENSMUSG00000020019  | -0.053515535 | 5.532866353  | 0.050528156 | 0.822146779 | 0.999071534 | Ntn4          | Ntn4          | NTN4     | 42.24838019 | 41.74019126 | 49.95160349 | 58.00344107 | 51.14480317 | 39.50985371 | 32.48707733 | 43.52194501 | 42.03423048 | 58.10411944 |
| ENSMUSG00000003037  | -0.051518295 | 6.217326746  | 0.050504211 | 0.82218822  | 0.999071534 | Rab8a         | Rab8a         | RAB8A    | 90.67260334 | 90.71376794 | 76.87969163 | 49.40005986 | 87.37782229 | 92.91728026 | 89.95425794 | 70.87859616 | 48.71256616 | 55.22832501 |
| ENSMUSG000000056310 | -0.068475687 | 4.242474495  | 0.050446476 | 0.822288186 | 0.999071534 | Tyw1          | Tyw1          | TYW1B    | 20.21184966 | 21.28512594 | 14.20456649 | 20.19019301 | 24.13354523 | 30.34182135 | 22.65035272 | 16.78703593 | 6.206923753 | 16.73189491 |
| ENSMUSG00000024312  | 0.057493691  | 4.915231237  | 0.050363037 | 0.822432762 | 0.999071534 | Wdr46         | Wdr46         | WDR46    | 36.35325737 | 31.66088371 | 31.64050356 | 18.73316877 | 35.51359095 | 55.66305356 | 25.23896446 | 21.6228076  | 23.02061594 | 27.32004716 |
| ENSMUSG000000030871 | 0.083363635  | 2.741290508  | 0.050356287 | 0.822444464 | 0.999071534 | Ears2         | Ears2         | EARS2    | 8.772504193 | 5.988294485 | 5.452937848 | 6.452535909 | 6.409451036 | 8.658697221 | 6.406814054 | 3.730452429 | 7.621159544 | 6.013024734 |
| ENSMUSG000000079104 | 0.101819816  | 3.568150951  | 0.050309109 | 0.822526272 | 0.999071534 | Prps1B        | Prps1B        | PRPS1    | 14.31672684 | 16.00831199 | 5.99149961  | 5.273040098 | 17.85489932 | 20.2278809  | 23.42693624 | 8.220811835 | 4.16413872  | 5.490153018 |
| ENSMUSG000000057914 | 0.094369897  | 2.230082538  | 0.050304144 | 0.822534884 | 0.999071534 | Cacnb2        | Cacnb2        | CACNB2   | 2.947561409 | 3.49811262  | 3.635291898 | 6.521918016 | 6.14784079  | 4.511254014 | 3.429910554 | 5.250266382 | 3.69272679  | 5.751588876 |
| ENSMUSG000000051373 | -0.133010422 | 0.684963597  | 0.050299384 | 0.822543141 | 0.999071534 | Ppapdc3       | Plpp7         | PLPP7    | 2.17558104  | 1.126510844 | 1.009803305 | 1.179495811 | 2.550699902 | 2.692199976 | 1.164875283 | 1.174401691 | 0.392843275 | 1.69933077  |
| ENSMUSG00000006673  | 0.048744966  | 5.977715885  | 0.050265361 | 0.822602168 | 0.999071534 | Qrich1        | Qrich1        | QRICH1   | 57.3370874  | 61.42448601 | 76.67773097 | 55.71383156 | 70.11154603 | 76.76408041 | 47.69517129 | 78.33950101 | 48.79113482 | 58.75770909 |
| ENSMUSG000000043505 | 0.118231434  | 1.209777387  | 0.050252487 | 0.822624509 | 0.999071534 | Gimap5        | Gimap5        | GIMAP5   | 2.877381375 | 3.49811262  | 1.009803305 | 1.665170557 | 1.831271725 | 2.983248622 | 3.624056435 | 1.72706131  | 1.335667137 | 1.503256184 |
| ENSMUSG000000037519 | 0.057379611  | 5.010958277  | 0.050193102 | 0.822727602 | 0.999071534 | Ppfia1        | Ppfia1        | PPFIA1   | 37.89721811 | 42.27380166 | 22.48495359 | 19.63513615 | 42.51166504 | 50.06036713 | 34.10495966 | 26.45857927 | 21.68494881 | 29.99976471 |
| ENSMUSG000000039740 | -0.052394399 | 4.841591497  | 0.050139322 | 0.82282102  | 0.999071534 | Alg2          | Alg2          | ALG2     | 25.47535218 | 32.90597465 | 27.4666499  | 27.96098894 | 37.27946011 | 36.81765373 | 32.22821615 | 29.77453698 | 16.02800564 | 23.26779136 |
| ENSMUSG000000028453 | 0.0806905    | 3.269709247  | 0.050108079 | 0.822875314 | 0.999071534 | Fancg         | Fancg         | FANCG    | 13.26402634 | 8.063446039 | 9.020909526 | 7.423885401 | 10.46440986 | 14.47967014 | 9.124856381 | 9.80970824  | 3.142746204 | 12.48356222 |
| ENSMUSG000000067889 | 0.231761525  | -0.040884907 | 0.050065475 | 0.822949382 | 0.999071534 | Sptbn2        | Sptbn2        | SPTBN2   | 1.333420637 | 2.193731643 | 0           | 0           | 0.523220493 | 1.8918162   | 0.129430587 | 0.414494714 | 0.942823861 | 1.111102397 |
| ENSMUSG000000097340 | 0.098887814  | 2.978771552  | 0.050047078 | 0.822981376 | 0.999071534 | Gm26617       | Gm26617       |          | 2.947561409 | 7.351965506 | 9.424830848 | 9.019673851 | 9.941189363 | 5.74821076  | 3.624056435 | 9.740625788 | 10.68533709 | 7.320204025 |
| ENSMUSG000000056999 | 0.047157372  | 5.516546283  | 0.050046573 | 0.822982253 | 0.999071534 | Ide           | Ide           | IDE      | 42.73964043 | 49.2700269  | 46.92219358 | 46.13910086 | 47.94007765 | 72.68939936 | 44.91241367 | 41.65671879 | 29.46324566 | 41.63366039 |
| ENSMUSG000000027346 | 0.057132494  | 4.757908889  | 0.050038969 | 0.822995478 | 0.999071534 | Gpcpd1        | Gpcpd1        | GPCPD1   | 33.61623607 | 35.27757642 | 22.48495359 | 23.93682676 | 21.9752607  | 23.50217817 | 31.96935498 | 29.15279491 | 16.49941757 | 31.69909778 |
| ENSMUSG000000038058 | -0.071085643 | 3.262679136  | 0.049901163 | 0.823235346 | 0.999071534 | Nod1          | Nod1          | NOD1     | 10.10592483 | 11.32439848 | 10.97319592 | 7.63203172  | 10.46440986 | 11.05984855 | 8.412988152 | 7.253657501 | 6.128355098 | 12.28748533 |
| ENSMUSG000000082051 | 0.194134217  | -0.04775031  | 0.04988054  | 0.823271274 | 0.999071534 | Gm16072       | Gm16072       |          | 0.280720134 | 0.237160178 | 2.01960661  | 1.248877918 | 0.261610246 | 0.291048646 | 0.323576467 | 0.828989429 | 1.807079067 | 0.784307574 |
| ENSMUSG000000025092 | 0.064830186  | 4.102146984  | 0.049857974 | 0.823310594 | 0.999071534 | Hspa12a       | Hspa12a       | HSPA12A  | 14.94834714 | 14.64464097 | 17.36861685 | 16.58232347 | 23.02170168 | 18.77263767 | 11.13103048 | 22.72812684 | 10.44963113 | 21.69917622 |
| ENSMUSG000000030327 | 0.047230736  | 4.955589607  | 0.049850375 | 0.823323837 | 0.999071534 | Necap1        | Necap1        | NECAP1   | 31.37047499 | 27.80703083 | 35.0738348  | 30.7362732  | 32.7012808  | 35.43517266 | 31.83992439 | 26.87307398 | 27.34189197 | 30.13048264 |
| ENSMUSG000000027937 | -0.060127466 | 6.55722937   | 0.049838604 | 0.823344353 | 0.999071534 | Jtb           | Jtb           | JTB      | 109.0597721 | 61.42448601 | 106.5679088 | 140.4293837 | 76.71720475 | 87.89669112 | 91.24856381 | 63.62493865 | 87.52548178 | 109.8684193 |
| ENSMUSG000000058318 | -0.064297854 | 5.147136232  | 0.049792184 | 0.823425284 | 0.999071534 | Phf21a        | Phf21a        | PHF21A   | 30.03705436 | 32.66881447 | 47.3261149  | 34.76043538 | 42.44626248 | 26.12161599 | 17.60255983 | 45.52533613 | 37.24154252 | 35.29384083 |
| ENSMUSG000000079311 | -0.132340672 | 1.570914632  | 0.049759297 | 0.823482646 | 0.999071534 | Gm3222        | Gm3222        |          | 1.894860906 | 5.098943819 | 2.490848153 | 1.595788451 | 4.381971627 | 4.438491853 | 2.588611739 | 2.901463001 | 0.15713731  | 3.660102012 |
| ENSMUSG000000048949 | -0.142105449 | 3.044239892  | 0.049661996 | 0.823652472 | 0.999071534 | Gm6206        | Gm6206        |          | 9.263764428 | 12.98451973 | 6.193460271 | 4.301690606 | 11.83786365 | 15.42557824 | 6.730390522 | 10.08603805 | 0           | 7.712357812 |
| ENSMUSG000000034413 | -0.113556333 | 2.433290632  | 0.049592858 | 0.823773252 | 0.999071534 | Neurl1b       | Neurl1b       | NEURL1B  | 7.93034379  | 3.853852886 | 5.722218729 | 4.509836926 | 6.54025616  | 10.98708639 | 2.78275762  | 0.967154334 | 6.599767028 | 3.660102012 |
| ENSMUSG000000003575 | -0.090658532 | 2.993741137  | 0.04958211  | 0.823792036 | 0.999071534 | Crtc1         | Crtc1         | CRTC1    | 3.930081878 | 9.782857327 | 10.77123525 | 8.187088573 | 9.156358623 | 9.459080998 | 3.624056435 | 7.875399573 | 4.32127603  | 11.9606905  |
| ENSMUSG000000030649 | 0.064234433  | 4.480865897  | 0.049576358 | 0.823802089 | 0.999071534 | Anapc15       | Anapc15       | ANAPC15  | 27.08949295 | 12.92522968 | 29.62089695 | 23.86744465 | 18.9013403  | 29.97801055 | 31.25748675 | 14.57639746 | 15.16375043 | 20.71879175 |
| ENSMUSG000000072694 | 0.072075344  | 3.748797061  | 0.049545279 | 0.82385642  | 0.999071534 | 1500011803Rik | 1500011803Rik |          | 12.1411458  | 11.68013875 | 15.887572   | 15.61097397 | 11.77246109 | 11.20537287 | 15.53167044 | 10.98410993 | 6.835472994 | 21.76453518 |
| ENSMUSG000000026866 | 0.172923277  | -0.268208394 | 0.049517497 | 0.823905001 | 0.999071534 | Kynu          | Kynu          | KYNU     | 0.421080201 | 0.355740266 | 1.211763966 | 0.832585279 | 0.588623054 | 0.509335131 | 0.517722348 | 0.207247357 | 1.178529826 | 1.045743432 |
| ENSMUSG000000009687 | 0.053439428  | 7.215173618  | 0.049491148 | 0.823951091 | 0.999071534 | Fxyd5         | Fxyd5         | FXYD5    | 146.53591   | 159.9645398 | 174.8979324 | 128.8425719 | 147.090361  | 137.8842961 | 150.1394809 | 180.4433657 | 106.5390963 | 153.3321307 |
| ENSMUSG000000014426 | 0.057153656  | 4.834959972  | 0.049433713 | 0.824051602 | 0.999071534 | Map3k4        | Map3k4        | MAP3K4   | 24.63319177 | 27.09555029 | 33.72743039 | 24.21435519 | 35.12117558 | 39.58261587 | 16.37296925 | 23.76436362 | 29.85608894 | 30.39191849 |
| ENSMUSG000000042444 | -0.051446748 | 5.145384837  | 0.04939632  | 0.824117071 | 0.999071534 | Fam63b        | Fam63b        | FAM63B   | 34.24785637 | 41.9180614  | 32.1117451  | 44.40454819 | 32.83208592 | 33.76164295 | 29.70431971 | 38.54800844 | 33.54881573 | 29.47689299 |
| ENSMUSG000000003623 | 0.053999465  | 5.293866737  | 0.049376436 | 0.824151894 | 0.999071534 | Crot          | Crot          | CROT     | 41.75711996 | 43.81534282 | 26.65880726 | 42.66999553 | 44.21213164 | 30.48734568 | 50.80150538 | 38.82433825 | 34.6487769  | 34.77096912 |

|                    |              |              |             |             |             |          |          |          |             |             |             |             |             |             |             |             |             |             |
|--------------------|--------------|--------------|-------------|-------------|-------------|----------|----------|----------|-------------|-------------|-------------|-------------|-------------|-------------|-------------|-------------|-------------|-------------|
| ENSMUSG00000032959 | -0.060684745 | 9.268300792  | 0.049369264 | 0.824164458 | 0.999071534 | Pebp1    | Pebp1    | PEBP1    | 792.4027587 | 559.5201491 | 609.3826345 | 639.3561118 | 669.3298154 | 552.1192816 | 892.7474735 | 484.5443211 | 404.4714364 | 589.8646547 |
| ENSMUSG00000025804 | -0.072772714 | 5.990475018  | 0.049348252 | 0.82420127  | 0.999071534 | Ccr1     | Ccr1     | CCR1     | 112.2178736 | 80.63446039 | 44.96990719 | 46.55539349 | 56.18080041 | 84.76791817 | 122.6354811 | 36.26828751 | 29.14897104 | 35.3591998  |
| ENSMUSG00000039361 | -0.059491416 | 8.081111523  | 0.04932283  | 0.824245817 | 0.999071534 | Picalm   | Picalm   | PICALM   | 234.8925723 | 352.0642837 | 283.7547287 | 242.9761371 | 323.4156671 | 285.6642461 | 223.2677625 | 355.7055474 | 187.8576543 | 230.6517857 |
| ENSMUSG00000015542 | -0.075235962 | 3.454371951  | 0.049312323 | 0.824264233 | 0.999071534 | Nat9     | Nat9     | NAT9     | 14.45708691 | 10.79078808 | 13.06012275 | 9.991023343 | 9.41796887  | 7.276216152 | 9.254286968 | 10.43145031 | 13.27810271 | 8.823460208 |
| ENSMUSG00000071256 | 0.093998648  | 2.845308998  | 0.049297432 | 0.824290335 | 0.999071534 | Zfp213   | Zfp213   | ZNF213   | 9.544484562 | 7.351965506 | 5.722218729 | 5.273040098 | 7.717502268 | 16.95358363 | 7.701119924 | 6.286503168 | 3.378452169 | 3.137230296 |
| ENSMUSG00000058672 | -0.051162391 | 6.940095521  | 0.049263887 | 0.824349152 | 0.999071534 | Tubb2a   | Tubb2a   | TUBB2A   | 155.6593144 | 114.3704957 | 109.7319592 | 115.5905895 | 154.6770582 | 139.4123015 | 145.2211186 | 92.50140376 | 87.44691312 | 122.6787764 |
| ENSMUSG00000064043 | 0.073111046  | 4.757991351  | 0.049228639 | 0.824410977 | 0.999071534 | Trerf1   | Trerf1   |          | 18.17662869 | 22.58950692 | 32.38102598 | 29.41801318 | 33.28990385 | 26.26714031 | 9.319002261 | 32.12334036 | 31.27032473 | 31.17622607 |
| ENSMUSG00000044080 | -0.056446802 | 5.973470844  | 0.049217472 | 0.824430568 | 0.999071534 | S100a1   | S100a1   | S100A1   | 64.91653103 | 56.50341232 | 54.32741782 | 92.00067328 | 61.87082327 | 41.32890774 | 62.77383467 | 70.53318389 | 49.02684078 | 68.36547687 |
| ENSMUSG00000032412 | -0.059780206 | 7.896767234  | 0.049197763 | 0.824465152 | 0.999071534 | Atp1b3   | Atp1b3   | ATP1B3   | 319.5998727 | 220.6775453 | 226.4652212 | 258.1014364 | 237.1496883 | 300.3622028 | 329.3361285 | 174.3641098 | 150.3804059 | 193.5932529 |
| ENSMUSG00000026495 | 0.112985115  | 1.504161858  | 0.049134422 | 0.824576347 | 0.999071534 | Efcab2   | Efcab2   | EFCA2    | 2.105401006 | 1.837991377 | 3.500651458 | 4.440454819 | 1.438856355 | 4.074681045 | 2.265035272 | 3.039627905 | 2.828471584 | 1.437897219 |
| ENSMUSG00000019494 | -0.060659507 | 6.567473571  | 0.04908824  | 0.824657467 | 0.999071534 | Cops6    | Cops6    | COPS6    | 116.0075954 | 112.6510844 | 76.67773097 | 86.10319423 | 112.3616008 | 115.6918368 | 160.1056361 | 62.38145451 | 50.99105716 | 69.14978445 |
| ENSMUSG00000040998 | -0.084246076 | 2.507331923  | 0.049080519 | 0.824671033 | 0.999071534 | Npnt     | Npnt     | NPNT     | 6.316203019 | 4.565333419 | 6.866662475 | 6.660682229 | 5.166802366 | 8.58593506  | 6.018522294 | 3.937699786 | 4.32127603  | 3.725460977 |
| ENSMUSG00000060510 | -0.060570269 | 4.485605016  | 0.049065534 | 0.824697365 | 0.999071534 | Zfp266   | Zfp266   | ZNF562   | 14.17636678 | 26.20619963 | 30.56338004 | 20.05142879 | 27.0766605  | 32.5246862  | 18.44385864 | 25.07693022 | 15.47802505 | 15.81686941 |
| ENSMUSG00000022889 | -0.058888897 | 4.209028185  | 0.049063091 | 0.824701659 | 0.999071534 | Mrp19    | Mrp19    | MRPL39   | 17.54500839 | 24.19033812 | 15.95489222 | 17.27614453 | 22.49848119 | 18.62711335 | 23.03864448 | 12.43484143 | 13.43524002 | 19.67304832 |
| ENSMUSG00000020312 | 0.121542359  | 2.501887205  | 0.049047655 | 0.824728789 | 0.999071534 | Shc2     | Shc2     | SHC2     | 4.982782381 | 11.6208487  | 3.433331237 | 2.358991623 | 5.363010051 | 1.382481069 | 2.718042326 | 9.878790692 | 5.814080477 | 6.731973344 |
| ENSMUSG00000026466 | -0.048284988 | 5.763522338  | 0.049029041 | 0.82476151  | 0.999071534 | Tor1a1p1 | Tor1a1p1 | TOR1A1P1 | 58.74068807 | 71.62237364 | 45.97971049 | 45.02898715 | 65.92578209 | 78.87418309 | 57.01417356 | 50.84468496 | 32.68456052 | 44.57481379 |
| ENSMUSG00000022822 | 0.049046996  | 5.040804375  | 0.049004945 | 0.824803879 | 0.999071534 | Abcc5    | Abcc5    | ABCC5    | 35.51109697 | 41.50303108 | 29.62089695 | 28.16913526 | 32.96289104 | 43.07519962 | 37.40543963 | 26.45857927 | 20.8206936  | 36.33958426 |
| ENSMUSG00000029686 | 0.047063055  | 6.015742994  | 0.048998643 | 0.82481496  | 0.999071534 | Cul1     | Cul1     | CUL1     | 62.10932968 | 70.73302298 | 63.28100712 | 62.86018853 | 70.96177933 | 94.37252349 | 75.26388632 | 63.14136149 | 40.22715141 | 51.63358196 |
| ENSMUSG00000028518 | 0.172830654  | 0.251998767  | 0.048874013 | 0.825034288 | 0.999071534 | Prkaa2   | Prkaa2   | PRKAA2   | 1.19306057  | 1.600831199 | 1.548365068 | 0.277528426 | 0.523220493 | 1.964578361 | 2.135604685 | 0.345412262 | 0.078568655 | 1.176461361 |
| ENSMUSG00000040102 | -0.118533859 | 1.492366688  | 0.048844484 | 0.825086296 | 0.999071534 | Cmtm8    | Cmtm8    | CMTM8    | 3.579181711 | 2.134441599 | 1.548365068 | 4.371072713 | 2.746907587 | 4.001918884 | 4.659501131 | 1.243484143 | 0.864255206 | 2.156845829 |
| ENSMUSG00000070003 | -0.049742227 | 5.488081118  | 0.048829669 | 0.825112395 | 0.999071534 | Ssbp4    | Ssbp4    | SSBP4    | 56.56510703 | 36.87840762 | 51.70192922 | 43.78010923 | 47.61306484 | 67.01395076 | 32.61650791 | 34.40306129 | 35.43446345 | 46.79701859 |
| ENSMUSG00000031264 | -0.10888681  | 2.688589006  | 0.04882861  | 0.825114261 | 0.999071534 | Btk      | Btk      | BTB      | 10.2462849  | 7.351965506 | 4.981696305 | 4.579219032 | 7.063476652 | 13.38823772 | 10.22501637 | 4.006782239 | 1.492804447 | 2.352922722 |
| ENSMUSG00000036639 | -0.073777026 | 4.15362562   | 0.048694146 | 0.825351337 | 0.999071534 | Nudt1    | Nudt1    | NUDT1    | 31.65119513 | 11.20581839 | 16.02221244 | 21.09216039 | 13.99614818 | 22.19245926 | 26.66270091 | 9.947873145 | 10.76390575 | 15.29399769 |
| ENSMUSG00000014402 | 0.045489772  | 6.238924866  | 0.048642456 | 0.825442566 | 0.999071534 | Tsg101   | Tsg101   | TSG101   | 79.65433807 | 70.67373293 | 67.92610232 | 77.08352038 | 90.12472988 | 87.02354518 | 86.91263914 | 75.85253273 | 51.93888102 | 71.50270717 |
| ENSMUSG00000054823 | 0.050900513  | 5.971868103  | 0.048627213 | 0.825469478 | 0.999071534 | Whsc1l1  | Whsc1l1  | WHSC1L1  | 63.51293036 | 79.92297986 | 56.75094575 | 47.31859667 | 73.38167411 | 76.25474528 | 49.70134539 | 85.66224097 | 45.56981996 | 52.61396643 |
| ENSMUSG00000078652 | 0.06349912   | 6.420216305  | 0.048616032 | 0.82548922  | 0.999071534 | Psme3    | Psme3    | PSME3    | 106.3929308 | 90.47660777 | 80.51498353 | 64.6641233  | 94.24509126 | 175.7933822 | 108.9158389 | 43.45286256 | 47.53403633 | 69.08442548 |
| ENSMUSG00000056608 | 0.051596233  | 5.015687465  | 0.048546691 | 0.825611716 | 0.999071534 | Chd9     | Chd9     | CHD9     | 26.87895285 | 33.85461536 | 30.69802048 | 33.9278501  | 38.71831646 | 38.70946993 | 22.52092213 | 27.14940379 | 33.78452169 | 35.1631229  |
| ENSMUSG00000052013 | -0.186539558 | -0.042970818 | 0.048493587 | 0.825705588 | 0.999071534 | Btla     | Btla     | BTB      | 1.263240604 | 0.889350666 | 0.471241542 | 0           | 2.092881971 | 1.091432423 | 0.711868228 | 0.27632981  | 1.021392516 | 0.653589645 |
| ENSMUSG00000060860 | 0.059110921  | 7.509182456  | 0.048472042 | 0.825743688 | 0.999071534 | Ube2s    | Ube2s    | UBE2S    | 221.839086  | 150.7745829 | 193.5456335 | 164.5049746 | 196.7963078 | 243.3894303 | 274.7811361 | 132.2928963 | 117.4601394 | 148.1034136 |
| ENSMUSG00000012076 | 0.067704188  | 3.994417226  | 0.048452485 | 0.825778282 | 0.999071534 | Brms1l   | Brms1l   | BRMS1L   | 19.29950922 | 15.71186177 | 12.79084186 | 15.33344555 | 17.13547114 | 24.88465924 | 24.20351976 | 9.878790692 | 10.92104306 | 10.39207536 |
| ENSMUSG00000054312 | 0.069779655  | 7.25751035   | 0.048409197 | 0.825854877 | 0.999071534 | Mrps21   | Mrps21   | MRPS21   | 155.5891344 | 80.57517035 | 187.1502126 | 211.1991323 | 133.7482385 | 99.82968561 | 131.6956222 | 142.5861817 | 165.2298817 | 194.2468425 |
| ENSMUSG00000005699 | -0.101597707 | 2.239308107  | 0.048400161 | 0.825870869 | 0.999071534 | Pard6a   | Pard6a   | PARD6A   | 6.73728322  | 6.284744707 | 3.837252559 | 2.150845303 | 5.886230544 | 7.785551283 | 6.859821109 | 3.039627905 | 1.964216377 | 2.679717545 |
| ENSMUSG00000015342 | -0.104993489 | 1.897487161  | 0.04827907  | 0.826085344 | 0.999071534 | Xk       | Xk       | XK       | 2.737021308 | 5.158233863 | 2.760129034 | 3.81601586  | 4.839789558 | 8.513172898 | 2.78275762  | 2.141556024 | 2.042785033 | 2.287563758 |
| ENSMUSG00000028430 | -0.076257256 | 4.401652415  | 0.048242976 | 0.826149327 | 0.999071534 | Nol6     | Nol6     | NOL6     | 26.80877281 | 27.80703083 | 22.35031315 | 12.55816129 | 23.21790937 | 49.18722119 | 17.40841395 | 8.35897674  | 13.43524002 | 16.53581802 |
| ENSMUSG00000022210 | -0.085127311 | 4.063153471  | 0.048239972 | 0.826154653 | 0.999071534 | Dhrs4    | Dhrs4    | DHRS4    | 30.80903472 | 16.18618212 | 12.92548231 | 14.36209606 | 14.78097892 | 29.61419974 | 28.21586796 | 8.289894287 | 7.306884924 | 8.300588492 |
| ENSMUSG00000028857 | 0.061128701  | 4.338786049  | 0.048177889 | 0.826264769 | 0.999071534 | Tmem222  | Tmem222  | TMEM222  | 25.33499211 | 21.10725581 | 14.40652715 | 18.31687613 | 23.34871449 | 26.8492376  | 29.89465559 | 18.8595095  | 10.44963113 | 15.55543355 |
| ENSMUSG00000036309 | 0.065579877  | 8.429616512  | 0.048115382 | 0.826375712 | 0.999071534 | Skp1a    | Skp1a    | SKP1     | 457.0123784 | 308.6046811 | 282.2736839 | 371.9574732 | 328.059249  | 338.1985268 | 598.3576035 | 225.692372  | 246.941283  | 301.3048264 |
| ENSMUSG00000022414 | 0.063797933  | 4.844766079  | 0.048102066 | 0.826399356 | 0.999071534 | Tab1     | Tab1     | TAB1     | 23.51031124 | 26.56193989 | 35.0738348  | 30.18121635 | 29.49655528 | 28.37724299 | 12.16647517 | 31.36343339 | 30.72034414 | 36.01278944 |
| ENSMUSG00000059981 | -0.051103989 | 5.088034483  | 0.048098846 | 0.826405075 | 0.999071534 | Taok2    | Taok2    | TAOK2    | 39.65171895 | 32.66881447 | 33.32350907 | 32.47082586 | 41.20361381 | 49.62379416 | 23.16807507 | 28.46197039 | 33.39167842 | 27.12397027 |

|                     |              |              |             |             |             |               |           |              |             |             |             |             |             |             |             |             |             |             |
|---------------------|--------------|--------------|-------------|-------------|-------------|---------------|-----------|--------------|-------------|-------------|-------------|-------------|-------------|-------------|-------------|-------------|-------------|-------------|
| ENSMUSG00000047710  | -0.059578024 | 4.568842419  | 0.04809618  | 0.82640981  | 0.999071534 | Champ1        | Champ1    | CHAMP1       | 22.24707063 | 29.58573216 | 22.48495359 | 21.43907092 | 29.6273604  | 43.43901043 | 22.97392199 | 14.16190274 | 14.37806388 | 21.43774036 |
| ENSMUSG00000068299  | -0.151709314 | 0.193629127  | 0.048080009 | 0.826438529 | 0.999071534 | 1700019G17Rik | Nat8f4    | NAT8         | 1.263240604 | 0.415030311 | 1.750325729 | 1.110113705 | 0.981038424 | 1.236956746 | 0.517722348 | 1.796143762 | 0.707117896 | 0.392153787 |
| ENSMUSG00000027968  | 0.061236586  | 6.728760363  | 0.048066181 | 0.826463093 | 0.999071534 | Larp7         | Larp7     | LARP7        | 80.00523824 | 69.84367231 | 149.8548105 | 132.2422951 | 102.6820217 | 118.020226  | 69.89251696 | 91.87966168 | 119.1100811 | 115.946803  |
| ENSMUSG00000024136  | 0.145370427  | 0.528780124  | 0.048054854 | 0.826483214 | 0.999071534 | Dnase1l2      | Dnase1l2  | DNASE1L2     | 1.403600671 | 1.245090933 | 0.807842644 | 1.80393477  | 1.177246109 | 0.727621615 | 0.258861174 | 2.417885834 | 1.178529826 | 1.895409971 |
| ENSMUSG00000065037  | -0.117042121 | 3.692336747  | 0.048036307 | 0.82651617  | 0.999071534 | Rn7sk         | Rn7sk     |              | 13.68510654 | 9.782857327 | 7.87646578  | 29.76492371 | 6.671061283 | 3.856394561 | 3.365195261 | 13.88557293 | 20.74212495 | 12.94107497 |
| ENSMUSG00000024402  | -0.170473084 | -0.357743835 | 0.048029223 | 0.82652876  | 0.999071534 | Lta           | Lta       | LTA          | 0.491260235 | 0.415030311 | 1.009803305 | 1.110113705 | 0.523220493 | 0.509335131 | 0.258861174 | 0.27632981  | 1.021392516 | 0.784307574 |
| ENSMUSG00000027519  | -0.048085077 | 5.549426092  | 0.047983813 | 0.82660948  | 0.999071534 | Rab22a        | Rab22a    | RAB22A       | 43.09054059 | 60.35726521 | 42.47905904 | 45.02898715 | 55.8537876  | 56.02686437 | 34.10495966 | 56.57852851 | 35.43446345 | 40.78399385 |
| ENSMUSG00000034189  | -0.051358256 | 4.433450144  | 0.047931572 | 0.826702394 | 0.999071534 | Hsd1l         | Hsd1l     | HSDL1        | 20.91365    | 23.95317794 | 19.45554368 | 25.25508678 | 23.6757273  | 26.04885382 | 21.16190097 | 21.96821986 | 14.29949523 | 19.60768935 |
| ENSMUSG00000061374  | 0.056098043  | 4.200412005  | 0.047865561 | 0.826819873 | 0.999071534 | Fiz1          | Fiz1      | FIZ1         | 19.65040939 | 20.04003501 | 17.50325729 | 15.12529923 | 20.86341715 | 23.79322682 | 12.55476693 | 16.44162367 | 16.73512354 | 20.65343278 |
| ENSMUSG00000027901  | 0.171117223  | 0.410036572  | 0.047774312 | 0.82698241  | 0.999071534 | Dennd2d       | Dennd2d   | DENND2D      | 2.596661241 | 1.304380977 | 0.201960661 | 0.346910533 | 1.438856355 | 1.819054038 | 1.423736457 | 0.414494714 | 0.15713731  | 2.548999616 |
| ENSMUSG00000004933  | -0.09288124  | 2.537311125  | 0.047743834 | 0.827036735 | 0.999071534 | Matk          | Matk      | MATK         | 12.98330621 | 3.853852886 | 4.981696305 | 4.162926393 | 4.643581873 | 6.112021568 | 5.79666112  | 3.799534882 | 4.556981996 | 6.339819557 |
| ENSMUSG00000069996  | -0.108831996 | 2.374586831  | 0.047691188 | 0.827130614 | 0.999071534 | Gm7125        | Gm7125    |              | 8.842684226 | 4.506043375 | 6.193460271 | 3.677251647 | 4.120361381 | 8.440410737 | 9.189571674 | 3.661369977 | 1.807079067 | 1.503256184 |
| ENSMUSG00000028099  | -0.048629595 | 5.20847261   | 0.047682639 | 0.827145864 | 0.999071534 | Polr3c        | Polr3c    | POLR3C       | 46.4591822  | 40.73226051 | 43.55618256 | 27.47531419 | 37.08325242 | 46.34949689 | 42.6473784  | 31.91609301 | 28.28471584 | 27.51612406 |
| ENSMUSG00000004071  | 0.053349896  | 4.882585986  | 0.047676304 | 0.827157166 | 0.999071534 | Cdip1         | Cdip1     | CDIP1        | 27.22985301 | 28.75567154 | 38.17056493 | 26.71211102 | 28.71172454 | 28.95934029 | 19.8675951  | 36.1301226  | 25.92765618 | 32.2219695  |
| ENSMUSG00000031200  | -0.112665277 | 1.48022189   | 0.047668669 | 0.827170787 | 0.999071534 | Mtcp1         | Mtcp1     | MTCP1        | 2.526481208 | 3.083082309 | 1.481044848 | 2.983430582 | 4.251166504 | 4.729540499 | 2.459181152 | 3.039627905 | 0.628549241 | 2.091486864 |
| ENSMUSG00000072919  | -0.166071    | 0.076572971  | 0.047644052 | 0.827214716 | 0.999071534 | Noxred1       | Noxred1   | NOXRED1      | 0.771980369 | 0.711480533 | 0.740522424 | 0.693821065 | 2.223687094 | 0.727621615 | 0.453007054 | 0.483577167 | 1.964216377 | 0.326794823 |
| ENSMUSG00000046636  | -0.190661086 | 1.139558144  | 0.047614989 | 0.827266592 | 0.999071534 | Gm7729        | Gm7729    |              | 2.596661241 | 4.091013064 | 0           | 0.555056852 | 4.316569065 | 6.039259406 | 2.847472913 | 0.345412262 | 0.471411931 | 0.588230681 |
| ENSMUSG00000020580  | 0.04847168   | 6.741015079  | 0.047574179 | 0.827339464 | 0.999071534 | Rock2         | Rock2     | ROCK2        | 99.5854676  | 137.1378727 | 102.5286956 | 85.33999106 | 122.629803  | 152.2912041 | 100.3734202 | 105.7652346 | 83.59704902 | 90.19537102 |
| ENSMUSG00000013997  | -0.068178131 | 3.488768143  | 0.047495732 | 0.827479635 | 0.999071534 | Nit1          | Nit1      | NIT1         | 13.19384631 | 10.79078808 | 8.953589305 | 10.75422652 | 15.43500454 | 9.168032352 | 12.61948223 | 10.36236786 | 7.306884924 | 12.74499808 |
| ENSMUSG00000004788  | 0.046722163  | 5.433245315  | 0.047359506 | 0.827723335 | 0.999071534 | Elf2b2        | Elf2b2    | EIF2B2       | 50.17872398 | 43.69676273 | 46.51827226 | 35.31549223 | 44.86615725 | 45.84016176 | 36.95243258 | 44.35093444 | 43.76274089 | 38.10427631 |
| ENSMUSG00000097234  | 0.180118807  | -0.188095489 | 0.047305415 | 0.827820202 | 0.999071534 | Gm26518       | Gm26518   |              | 0.561440268 | 0.592900444 | 1.548365068 | 0.624438959 | 0.261610246 | 0.582097292 | 0.323576467 | 1.105319238 | 0.078568655 | 1.764692042 |
| ENSMUSG00000001774  | 0.051479918  | 5.57020498   | 0.047293849 | 0.827840924 | 0.999071534 | Chordc1       | Chordc1   | CHORDC1      | 54.31934596 | 45.23830388 | 47.662716   | 38.92336177 | 56.3770081  | 66.43185347 | 68.40406521 | 34.5412262  | 25.14196963 | 45.09768551 |
| ENSMUSG00000058690  | 0.045038812  | 5.778715356  | 0.047222009 | 0.827969682 | 0.999071534 | Ccser2        | Ccser2    | CCSER2       | 48.56458321 | 60.59442538 | 58.77055236 | 52.73040098 | 59.18931824 | 64.24898862 | 41.22364195 | 61.48338263 | 48.39829154 | 52.87540228 |
| ENSMUSG00000020251  | 0.169177216  | -0.23870606  | 0.047159095 | 0.828082526 | 0.999071534 | Gltrd2        | Gltrd2    | GLTRD2       | 0.701800335 | 0.711480533 | 0.538561763 | 0.346910533 | 1.24264867  | 0.727621615 | 1.100159989 | 0.27632981  | 1.257098482 | 0.196076894 |
| ENSMUSG00000022682  | 0.043690167  | 5.916698515  | 0.047105715 | 0.828178334 | 0.999071534 | Rrn3          | Rrn3      | RRN3         | 62.74094999 | 66.87917009 | 59.9149961  | 55.99135999 | 63.04806938 | 85.20449114 | 67.62748169 | 45.45625368 | 44.86270206 | 57.64660669 |
| ENSMUSG00000098192  | -0.252293181 | -0.446853838 | 0.047081293 | 0.828222185 | 0.999071534 | Gm3534        | Gm3534    |              | 0           | 1.837991377 | 0.673202203 | 0.485674746 | 0.327012808 | 0.291048646 | 1.229590576 | 1.105319238 | 0           | 0           |
| ENSMUSG00000000811  | 0.080232112  | 2.748753164  | 0.047023983 | 0.828325136 | 0.999071534 | Txnrd3        | Txnrd3    | TXNRD3       | 6.877643287 | 5.869714396 | 9.290190407 | 4.579219032 | 6.736463844 | 9.968416129 | 4.594785837 | 5.664761096 | 6.914041649 | 5.751588876 |
| ENSMUSG00000080859  | 0.476042893  | 6.635270784  | 0.047023279 | 0.828326401 | 0.999071534 | Rpl10-ps1     | Rpl10-ps1 |              | 0           | 437.1454974 | 0           | 0           | 0           | 15.93491337 | 552.9274675 | 0           | 0           | 0           |
| ENSMUSG00000042557  | 0.047963976  | 5.00343518   | 0.046959047 | 0.828441865 | 0.999071534 | Sin3a         | Sin3a     | SIN3A        | 33.475876   | 33.43958505 | 34.80455392 | 24.90817625 | 37.08325242 | 46.34949689 | 27.24513855 | 31.91609301 | 19.79930108 | 35.1631229  |
| ENSMUSG00000027425  | 0.079188508  | 4.462758898  | 0.04689981  | 0.828548424 | 0.999071534 | Csrp2bp       | Csrp2bp   | KAT14        | 32.35299546 | 25.79116932 | 18.10913927 | 13.66827499 | 21.58284533 | 54.42609682 | 24.59181152 | 12.43484143 | 7.149747614 | 18.82338178 |
| ENSMUSG00000074194  | 0.291075153  | -1.02912287  | 0.046882292 | 0.82857995  | 0.999071534 | Zfp791        | Zfp791    | ZNF791       | 0.280720134 | 1.007930755 | 0           | 0           | 0.327012808 | 1.673529715 | 0.258861174 | 0           | 0           | 0.196076894 |
| ENSMUSG000000304024 | 0.053234576  | 9.202265952  | 0.04686824  | 0.828605244 | 0.999071534 | Cct2          | Cct2      | CCT2         | 614.6367338 | 568.0579155 | 622.9139988 | 535.8380089 | 664.163013  | 673.4138049 | 704.1671083 | 553.2813612 | 446.9770789 | 535.4859962 |
| ENSMUSG00000040061  | -0.103284239 | 2.26558166   | 0.046763334 | 0.828794194 | 0.999071534 | Plcb2         | Plcb2     | PLCB2        | 8.421604025 | 6.818355107 | 4.645095204 | 1.179495811 | 4.381971627 | 7.276216152 | 5.177223478 | 2.556050739 | 2.907040239 | 4.509768551 |
| ENSMUSG00000030400  | 0.060307002  | 4.196695629  | 0.046750288 | 0.828817707 | 0.999071534 | Erc2          | Erc2      | ERCC2        | 20.14166963 | 15.8897319  | 19.11894258 | 18.45564034 | 18.9013403  | 30.12353487 | 10.41916225 | 14.507315   | 15.32088774 | 21.24166346 |
| ENSMUSG00000090264  | 0.094881841  | 4.012353456  | 0.046748081 | 0.828821684 | 0.999071534 | Elf4ebp3      | Elf4ebp3  | EIF4EBP3     | 8.772504193 | 7.707705773 | 24.10063888 | 20.60648565 | 18.57432749 | 10.4049891  | 4.659501131 | 17.47786046 | 19.2493205  | 25.09784237 |
| ENSMUSG00000022228  | -0.055832632 | 4.955032564  | 0.0467333   | 0.828848331 | 0.999071534 | Zscan26       | Zscan26   | RPS-874C20.8 | 27.01931291 | 34.15106558 | 35.61239656 | 29.48739528 | 37.27946011 | 28.52276732 | 20.57946333 | 46.76882027 | 20.58498764 | 29.34617506 |
| ENSMUSG00000053219  | 0.121105428  | 2.234249251  | 0.046621585 | 0.829049857 | 0.999071534 | Raet1e        | Raet1e    |              | 6.316203019 | 5.276813952 | 1.817645949 | 2.081463196 | 7.521294584 | 4.656778337 | 9.513148141 | 6.424668073 | 1.571373102 | 1.241820326 |
| ENSMUSG00000044860  | 0.22786066   | -0.684987386 | 0.046506419 | 0.829257874 | 0.999071534 | Gm1123        | Gm1123    | AC136352.2   | 0.280720134 | 0           | 0.134640441 | 1.665170557 | 0.196207685 | 0.291048646 | 0.453007054 | 0.138164905 | 0.471411931 | 1.176461361 |
| ENSMUSG00000026315  | 0.144953691  | 1.419757423  | 0.046506167 | 0.829258329 | 0.999071534 | Serpinb8      | Serpinb8  | SERPINB8     | 3.579181711 | 3.142372354 | 0.740522424 | 2.150845303 | 2.943115272 | 6.184783729 | 5.436084652 | 1.105319238 | 0.785686551 | 0.326794823 |

|                    |              |              |             |             |             |               |               |               |             |             |             |             |             |             |             |             |             |             |
|--------------------|--------------|--------------|-------------|-------------|-------------|---------------|---------------|---------------|-------------|-------------|-------------|-------------|-------------|-------------|-------------|-------------|-------------|-------------|
| ENSMUSG00000029701 | 0.051486158  | 4.869733419  | 0.046471211 | 0.829319876 | 0.999071534 | Rbm28         | Rbm28         | RBM28         | 28.56327365 | 25.25755892 | 34.40063259 | 26.22643628 | 34.14013715 | 47.29540499 | 20.12645627 | 25.14601267 | 23.88487115 | 29.54225196 |
| ENSMUSG00000041130 | 0.047486583  | 5.332306957  | 0.046465644 | 0.829331588 | 0.999071534 | Zfp598        | Zfp598        | ZNF598        | 50.31908405 | 38.41994878 | 39.11304802 | 33.58093957 | 44.34293676 | 64.46727511 | 34.42853613 | 30.3271966  | 30.72034414 | 41.82973728 |
| ENSMUSG00000023806 | -0.053970739 | 5.028167399  | 0.046441879 | 0.829374565 | 0.999071534 | Rsph3b        | Rsph3b        | RSPH3         | 30.17741442 | 43.69676273 | 25.44704329 | 28.93233843 | 44.21213164 | 30.85115649 | 23.49165153 | 40.4823171  | 22.3920667  | 36.60102012 |
| ENSMUSG00000038489 | 0.0830906    | 3.376299319  | 0.046441831 | 0.829374652 | 0.999071534 | Polr2l        | Polr2l        | POLR2L        | 11.22880537 | 4.209593153 | 14.54116759 | 13.25198235 | 8.109917638 | 14.47967014 | 11.84289871 | 5.112101477 | 9.821081887 | 10.1306395  |
| ENSMUSG00000086015 | 0.176471173  | -0.439453873 | 0.046425039 | 0.829405027 | 0.999071534 | 4833417C18Rik | 4833417C18Rik |               | 0.631620302 | 0.355740266 | 1.077123525 | 0.763203172 | 0.130805123 | 0.654859454 | 0.323576467 | 0.621742072 | 1.099961171 | 0.326794823 |
| ENSMUSG00000024352 | 0.104938202  | 1.638203932  | 0.046419374 | 0.829415276 | 0.999071534 | Spat24        | Spat24        | SPATA24       | 3.228281543 | 2.312311732 | 4.577774983 | 2.567137942 | 2.223687094 | 2.764962138 | 4.27120937  | 2.556050739 | 3.535589479 | 1.503256184 |
| ENSMUSG00000020876 | -0.064571024 | 3.965680211  | 0.046372116 | 0.829500797 | 0.999071534 | Snx11         | Snx11         | SNX11         | 17.54500839 | 15.77115181 | 18.10913927 | 13.59889288 | 17.39708138 | 28.15895651 | 16.76126101 | 8.35897674  | 10.99961171 | 11.56853672 |
| ENSMUSG00000021796 | 0.048591534  | 6.560037489  | 0.046357667 | 0.829526953 | 0.999071534 | Bmpr1a        | Bmpr1a        | BMPRI1A       | 90.88314344 | 114.844816  | 85.02543829 | 95.19225019 | 94.83371431 | 97.50129644 | 111.7633118 | 96.85359826 | 86.2683833  | 67.05829758 |
| ENSMUSG00000032264 | 0.082246801  | 3.977984851  | 0.046316394 | 0.829601694 | 0.999071534 | Zw10          | Zw10          | ZW10          | 29.40543405 | 14.76322106 | 10.63659481 | 11.10113705 | 13.47292769 | 33.17954565 | 19.8028798  | 9.326131073 | 5.578374512 | 14.70576701 |
| ENSMUSG00000020692 | 0.074714555  | 3.849530978  | 0.046207723 | 0.829798648 | 0.999071534 | Nle1          | Nle1          | NLE1          | 24.77355184 | 10.90936817 | 13.53136429 | 11.86434022 | 11.44544828 | 25.9033295  | 19.93231039 | 8.773471454 | 6.835472994 | 12.61428015 |
| ENSMUSG00000024038 | -0.054508962 | 5.927821344  | 0.046145788 | 0.829911007 | 0.999071534 | Ndufv3        | Ndufv3        | NDUFV3        | 54.74042616 | 54.42826077 | 74.59080414 | 59.73799374 | 77.89445086 | 38.2001348  | 50.80150538 | 81.44821137 | 50.99105716 | 59.93417045 |
| ENSMUSG00000073555 | -0.090538033 | 3.218841171  | 0.046143852 | 0.82991452  | 0.999071534 | Gm4951        | Gm4951        |               | 13.19384631 | 5.751134307 | 12.38692054 | 11.86434022 | 5.690022859 | 11.49642152 | 3.494625848 | 5.941090906 | 11.94243557 | 9.346331924 |
| ENSMUSG00000046808 | -0.09641466  | 2.185537484  | 0.046071761 | 0.830045405 | 0.999071534 | Atp10d        | Atp10d        | ATP10D        | 6.807463254 | 5.039653775 | 5.789538949 | 1.873316877 | 4.381971627 | 8.222124252 | 4.853647011 | 2.694215643 | 2.592765618 | 3.137230296 |
| ENSMUSG00000059586 | 0.047479319  | 5.460148178  | 0.046066682 | 0.83005463  | 0.999071534 | Nsmce2        | Nsmce2        | NSMCE2        | 41.33603976 | 43.75605277 | 39.71893    | 45.30651558 | 54.02251588 | 41.91100504 | 54.6197077  | 50.15386044 | 30.48463818 | 38.36571216 |
| ENSMUSG00000073062 | -0.062937339 | 4.136682054  | 0.046003442 | 0.830169541 | 0.999071534 | Zxdb          | Zxdb          | ZXDB          | 16.35194782 | 26.26548967 | 15.75293156 | 16.09664872 | 18.31271725 | 22.70179439 | 18.8321504  | 18.79042705 | 6.521198373 | 18.10443317 |
| ENSMUSG00000062078 | -0.050947687 | 7.287626159  | 0.045954149 | 0.830259168 | 0.999071534 | Qk            | Qk            | QKI           | 139.6582667 | 184.9256485 | 169.4449946 | 144.4535458 | 187.5091441 | 226.4358467 | 144.1209586 | 132.4310612 | 121.1528662 | 129.1493139 |
| ENSMUSG00000043140 | 0.077027322  | 3.170869814  | 0.045825941 | 0.830492514 | 0.999071534 | Tmem186       | Tmem186       | TMEM186       | 12.562226   | 9.842147372 | 7.87646578  | 6.244389589 | 8.567735569 | 11.78747017 | 13.20191987 | 8.497141644 | 3.614158135 | 8.169870563 |
| ENSMUSG00000025858 | 0.052663931  | 5.910438863  | 0.045726554 | 0.83067364  | 0.999071534 | Get4          | Get4          | GET4          | 79.44379797 | 57.09631276 | 60.72283875 | 51.82843359 | 57.61965677 | 67.52328589 | 98.62610726 | 41.44947144 | 36.61299328 | 55.35904294 |
| ENSMUSG00000032485 | -0.052947154 | 5.388570163  | 0.04564694  | 0.830818877 | 0.999071534 | Scap          | Scap          | SCAP          | 55.72294663 | 40.79155055 | 49.68232261 | 39.68656495 | 34.99037045 | 67.81433454 | 30.35147264 | 29.15279491 | 41.09140662 | 32.28732847 |
| ENSMUSG00000040268 | -0.049908994 | 5.328024069  | 0.045617525 | 0.830872574 | 0.999071534 | Plekha1       | Plekha1       | PLEKHA1       | 43.65198086 | 52.11594903 | 45.57578917 | 34.06661432 | 36.49462937 | 54.20781033 | 33.26366085 | 47.18331499 | 20.03500705 | 40.06504524 |
| ENSMUSG00000032892 | 0.207078457  | -0.119822831 | 0.045612638 | 0.830881495 | 0.999071534 | Rangrf        | Rangrf        | RANGRF        | 0.771980369 | 0.592900444 | 0.471241542 | 1.040731598 | 0.850233301 | 1.45524323  | 2.394465859 | 0           | 0           | 0.457512752 |
| ENSMUSG00000089672 | -0.057856979 | 5.504624051  | 0.045567552 | 0.830963837 | 0.999071534 | Gp49a         | Lilr4b        |               | 48.07332298 | 53.30174992 | 55.53918178 | 44.89022294 | 37.73727804 | 48.16855093 | 31.7104938  | 69.77327692 | 19.87786974 | 47.71204409 |
| ENSMUSG00000080198 | 0.159558387  | 0.044789947  | 0.045545955 | 0.831003296 | 0.999071534 | Gm13573       | Gm13573       |               | 1.122880537 | 1.422961066 | 1.077123525 | 0.277528426 | 0.523220493 | 0.582097292 | 1.68259763  | 1.4507315   | 0.549980586 | 0.261435858 |
| ENSMUSG00000035478 | -0.048604453 | 6.94533417   | 0.045531531 | 0.831029654 | 0.999071534 | Mbd3          | Mbd3          | MBD3          | 137.5528657 | 102.9275171 | 130.466587  | 117.3251422 | 162.9831835 | 166.698112  | 113.3164789 | 98.99515428 | 87.21120716 | 128.3650063 |
| ENSMUSG00000032217 | 0.048282416  | 4.69217352   | 0.045515738 | 0.831058518 | 0.999071534 | Rnf111        | Rnf111        | RNF111        | 25.33499211 | 26.91768016 | 26.72612748 | 24.49188361 | 27.9268938  | 39.87366451 | 24.00937388 | 25.42234248 | 16.73512354 | 23.46386826 |
| ENSMUSG00000061607 | 0.054231986  | 4.73531392   | 0.045465026 | 0.83115124  | 0.999071534 | Mdc1          | Mdc1          | MDC1          | 27.86147332 | 30.06005251 | 22.48495359 | 22.75733095 | 32.30886543 | 49.11445903 | 18.37914335 | 24.3861057  | 19.01361453 | 23.92138101 |
| ENSMUSG00000081600 | -0.129613349 | 1.543803497  | 0.045454074 | 0.831171272 | 0.999071534 | Gm12286       | Gm12286       |               | 3.579181711 | 2.727342043 | 2.760129034 | 1.665170557 | 4.51277675  | 2.40115133  | 0.453007054 | 5.526596192 | 3.142746204 | 0.915025503 |
| ENSMUSG00000040040 | 0.061990955  | 3.612784016  | 0.045425145 | 0.831224198 | 0.999071534 | Ift88         | Ift88         | IFT88         | 13.47456644 | 10.49433786 | 11.71371834 | 11.6561939  | 14.19235587 | 10.98708639 | 11.907614   | 14.85272726 | 10.68533709 | 10.58815225 |
| ENSMUSG00000021139 | 0.113245321  | 2.247295622  | 0.045400242 | 0.831269769 | 0.999071534 | Gm20498       | Gm20498       | SYNJ2BP-COX16 | 8.632144126 | 7.233385418 | 1.750325729 | 2.775284262 | 2.812310149 | 7.276216152 | 7.24811287  | 4.352194501 | 3.535589479 | 1.241820326 |
| ENSMUSG00000070713 | -0.089097056 | 4.668877419  | 0.045394142 | 0.831280935 | 0.999071534 | Gm10282       | Gm10282       | HMGN2         | 31.79155519 | 6.166164618 | 25.91828483 | 39.75594705 | 30.80460651 | 58.13696706 | 10.54859284 | 21.48464269 | 15.00661312 | 20.32663796 |
| ENSMUSG00000033697 | 0.06518327   | 3.552295835  | 0.045381981 | 0.831303197 | 0.999071534 | Arhgap39      | Arhgap39      | ARHGAP39      | 13.96582667 | 9.308536972 | 12.45424076 | 11.51742969 | 11.64165596 | 19.42749713 | 10.16030108 | 10.63869767 | 6.364061063 | 12.67963911 |
| ENSMUSG00000023050 | 0.065612611  | 3.862464106  | 0.045325756 | 0.831406161 | 0.999071534 | Map3k12       | Map3k12       | MAP3K12       | 18.52752886 | 19.56571465 | 10.63659481 | 8.533999106 | 16.41604296 | 13.31547556 | 12.23119047 | 14.71456236 | 15.32088774 | 14.31361323 |
| ENSMUSG00000019850 | -0.062163855 | 4.945698065  | 0.045204808 | 0.831627876 | 0.999071534 | Tnfaip3       | Tnfaip3       | TNFAIP3       | 46.038102   | 47.49132557 | 23.69671756 | 17.13738032 | 29.82356809 | 37.54527535 | 24.8506727  | 42.55479067 | 19.32788915 | 22.41812483 |
| ENSMUSG00000022428 | -0.072787821 | 4.542954232  | 0.045189055 | 0.831656776 | 0.999071534 | Cby1          | Cby1          | CBY1          | 33.475876   | 21.93731643 | 20.59998742 | 18.87193298 | 29.16954247 | 24.59361059 | 46.91858777 | 12.50392388 | 10.13535651 | 17.51620249 |
| ENSMUSG00000030793 | -0.063015729 | 4.016688277  | 0.045160902 | 0.83170844  | 0.999071534 | Pycard        | Pycard        | PYCARD        | 27.93165335 | 10.85007813 | 15.68561134 | 14.8477708  | 16.15443271 | 20.37340523 | 18.96158099 | 12.43484143 | 10.60676844 | 14.70576701 |
| ENSMUSG00000049091 | 0.056650264  | 5.123872595  | 0.045128839 | 0.831767297 | 0.999071534 | Sephs2        | Sephs2        | SEPHS2        | 45.89774194 | 30.712243   | 36.82416053 | 31.08318373 | 32.63587824 | 60.90192919 | 47.56574071 | 20.24115855 | 22.47063536 | 26.20894477 |
| ENSMUSG00000038708 | -0.055016738 | 5.832096029  | 0.045119619 | 0.831784227 | 0.999071534 | Golga4        | Golga4        | GOLGA4        | 46.10828204 | 81.34594093 | 58.50127148 | 46.90230403 | 68.73809224 | 62.35717242 | 29.31602795 | 71.70758558 | 41.16997527 | 65.29360554 |
| ENSMUSG00000040520 | 0.05407825   | 4.480874618  | 0.045108265 | 0.831805077 | 0.999071534 | Manea         | Manea         | MANEA         | 17.89590855 | 18.73565403 | 26.7934477  | 24.14497308 | 25.24538878 | 24.15703763 | 30.86919499 | 19.55033403 | 15.47802505 | 19.93448417 |
| ENSMUSG00000032382 | -0.051381645 | 6.669350538  | 0.045040217 | 0.831930094 | 0.999071534 | Snx1          | Snx1          | SNX1          | 113.7618344 | 121.544591  | 95.66203311 | 91.44561643 | 116.220352  | 110.3074369 | 126.7772599 | 119.9271374 | 48.24115423 | 85.03201282 |

|                     |              |              |             |             |             |          |          |          |             |             |             |             |             |             |             |             |             |             |
|---------------------|--------------|--------------|-------------|-------------|-------------|----------|----------|----------|-------------|-------------|-------------|-------------|-------------|-------------|-------------|-------------|-------------|-------------|
| ENSMUSG00000061778  | 0.04704145   | 5.269163696  | 0.045012225 | 0.831981551 | 0.999071534 | Mospd2   | Mospd2   | MOSPD2   | 39.23063875 | 41.79948131 | 35.34311568 | 39.40903652 | 40.41878307 | 41.76548071 | 37.92316198 | 50.77560251 | 29.38467701 | 28.82330335 |
| ENSMUSG00000039109  | -0.072234085 | 5.608414109  | 0.045010799 | 0.831984172 | 0.999071534 | F13a1    | F13a1    | F13A1    | 42.88000049 | 91.01021816 | 30.29409915 | 59.94614006 | 33.87852691 | 47.44092931 | 89.24238971 | 42.48570822 | 23.9634398  | 29.34617506 |
| ENSMUSG00000006307  | 0.054667858  | 4.915262771  | 0.044901426 | 0.832185389 | 0.999071534 | Kmt2b    | Kmt2b    | KMT2B    | 33.33551593 | 31.2458534  | 30.7653407  | 23.3123878  | 34.99037045 | 41.25614558 | 16.76126101 | 33.98856658 | 18.62077126 | 39.99968628 |
| ENSMUSG000000045751 | 0.076617168  | 3.787090699  | 0.04486898  | 0.832193725 | 0.999071534 | Mms22l   | Mms22l   | MMS22L   | 21.26455016 | 11.20581839 | 13.66600473 | 9.574730704 | 13.7999405  | 24.0115133  | 20.45003274 | 5.388431287 | 10.44963113 | 9.673126747 |
| ENSMUSG00000019883  | -0.058687624 | 4.059678     | 0.044844019 | 0.832291105 | 0.999071534 | Echdc1   | Echdc1   | ECHDC1   | 17.54500839 | 17.60914319 | 12.2522801  | 16.929234   | 23.47951961 | 22.99284304 | 17.79670571 | 15.68171669 | 12.2567102  | 10.78422914 |
| ENSMUSG00000029465  | 0.055295663  | 7.711435021  | 0.044814826 | 0.832344892 | 0.999071534 | Arpc3    | Arpc3    | ARPC3    | 191.5914916 | 206.6850948 | 213.7416996 | 197.2533289 | 258.536326  | 164.9518202 | 257.2432916 | 242.9629851 | 156.9016042 | 199.8023545 |
| ENSMUSG00000020633  | 0.15614716   | 0.035579735  | 0.044808395 | 0.832356743 | 0.999071534 | Dcdc2c   | Dcdc2c   | DCDC2C   | 0.491260235 | 0.355740266 | 0.740522424 | 1.457024238 | 1.308051232 | 1.018670261 | 0.19414588  | 1.105319238 | 0.785686551 | 1.437897219 |
| ENSMUSG00000020538  | -0.045046992 | 5.992372741  | 0.0447913   | 0.83238825  | 0.999071534 | Sreb1    | Sreb1    | SREBF1   | 71.86435435 | 80.39730022 | 62.40584426 | 53.70175047 | 67.69165125 | 97.79234509 | 59.99107706 | 53.60798306 | 43.84130954 | 54.37865847 |
| ENSMUSG00000038866  | -0.054245514 | 4.509108605  | 0.044788086 | 0.832394175 | 0.999071534 | Zcchc2   | Zcchc2   | ZCCHC2   | 25.82625234 | 29.82289234 | 19.05162236 | 19.21884351 | 26.29182976 | 33.10678349 | 16.56711513 | 26.113167   | 13.27810271 | 20.84950968 |
| ENSMUSG00000032040  | -0.05273687  | 4.539624124  | 0.044689184 | 0.83257659  | 0.999071534 | Dcps     | Dcps     | DCPS     | 25.47535218 | 20.27719519 | 24.1679591  | 25.53261521 | 26.74964769 | 35.65345915 | 22.65035272 | 21.41556024 | 12.02100423 | 21.50309932 |
| ENSMUSG00000038084  | 0.044819986  | 6.01254632   | 0.044686196 | 0.832582103 | 0.999071534 | Opa1     | Opa1     | OPA1     | 62.24968975 | 69.66580218 | 72.09995599 | 53.84051468 | 72.13902544 | 80.11113984 | 69.18064873 | 61.13797037 | 59.55504056 | 46.27414687 |
| ENSMUSG00000074604  | -0.066088635 | 5.760451836  | 0.044684063 | 0.83258604  | 0.999071534 | Mgst2    | Mgst2    | MGST2    | 62.46022985 | 41.85877135 | 52.50977187 | 83.05038154 | 44.86615725 | 21.97417278 | 48.98947716 | 60.10173358 | 46.11980054 | 70.26088684 |
| ENSMUSG00000078897  | -0.387051423 | -0.645475775 | 0.044653054 | 0.83264328  | 0.999071534 | Gm4724   | Gm4724   | ZNF788   | 0           | 2.905212176 | 0           | 0           | 0           | 0           | 1.553167044 | 0.483577167 | 0           | 0           |
| ENSMUSG00000021326  | -0.050029196 | 6.021321974  | 0.04459673  | 0.832747301 | 0.999071534 | Trim27   | Trim27   | TRIM27   | 74.03993539 | 62.31383667 | 63.01172624 | 69.38210655 | 73.64328436 | 102.2308369 | 78.95265804 | 39.99873994 | 37.63438579 | 59.41129873 |
| ENSMUSG00000049103  | -0.084978776 | 4.363213696  | 0.044557677 | 0.832819467 | 0.999071534 | Ccr2     | Ccr2     | CCR2     | 37.12523774 | 26.26548967 | 11.71371834 | 13.04383603 | 22.17146838 | 52.53428062 | 18.57328923 | 8.566224097 | 8.485414751 | 15.68615148 |
| ENSMUSG00000045983  | -0.066991034 | 8.27979244   | 0.044556138 | 0.832822312 | 0.999071534 | Elf4g1   | Elf4g1   | EIF4G1   | 378.2703808 | 386.2153493 | 322.8677768 | 233.0544959 | 338.0004383 | 692.841302  | 234.7223694 | 193.776279  | 181.8078679 | 250.0633982 |
| ENSMUSG00000039462  | -0.208997396 | 0.028476026  | 0.044546287 | 0.832840519 | 0.999071534 | Col10a1  | Col10a1  | COL10A1  | 0           | 1.719411288 | 0.673202203 | 1.873316877 | 0.588623054 | 1.600767553 | 0           | 0.27632981  | 1.099961171 | 1.045743432 |
| ENSMUSG00000026028  | -0.066405966 | 4.95902492   | 0.044424738 | 0.833065369 | 0.999071534 | Trak2    | Trak2    | TRAK2    | 36.35325737 | 47.19487535 | 21.87907161 | 22.61856673 | 37.54107036 | 59.66497245 | 36.36999494 | 23.62619872 | 10.60676844 | 24.57497065 |
| ENSMUSG00000032309  | 0.054260302  | 4.520118801  | 0.044404666 | 0.833102531 | 0.999071534 | Fbxo22   | Fbxo22   | FBXO22   | 24.84373187 | 23.3602775  | 27.1300488  | 24.70002993 | 15.82741991 | 31.65154026 | 28.34529854 | 16.71795348 | 16.81369219 | 20.65343278 |
| ENSMUSG00000052584  | 0.093364397  | 2.451499562  | 0.044401943 | 0.833107574 | 0.999071534 | Serp2    | Serp2    | SERP2    | 6.246022985 | 4.861783641 | 3.366011017 | 7.84017804  | 4.316569065 | 2.983248622 | 9.836724609 | 4.283112048 | 4.085570065 | 5.032640267 |
| ENSMUSG00000039512  | -0.057762336 | 4.041173463  | 0.044385311 | 0.833138374 | 0.999071534 | Uhrf1bp1 | Uhrf1bp1 | UHRF1BP1 | 18.87842902 | 20.27719519 | 16.5607742  | 12.21125075 | 18.96674286 | 21.90141062 | 11.45460695 | 12.9184186  | 11.86386692 | 20.32663796 |
| ENSMUSG00000039831  | 0.052856481  | 6.618225736  | 0.044307691 | 0.833282195 | 0.999071534 | Arhgap29 | Arhgap29 | ARHGAP29 | 82.53171945 | 127.5921756 | 88.86269085 | 90.0579743  | 111.6421726 | 95.10014511 | 97.97895433 | 142.5170993 | 77.39012527 | 66.40470794 |
| ENSMUSG00000060216  | -0.049804319 | 5.941040048  | 0.044301693 | 0.833293314 | 0.999071534 | Arrb2    | Arrb2    | ARRB2    | 84.63712045 | 55.49548157 | 58.29931082 | 61.26440008 | 64.5523283  | 98.08339373 | 45.6242819  | 39.86057503 | 45.4912513  | 69.4112203  |
| ENSMUSG00000066258  | 0.221905706  | -0.613238082 | 0.044285841 | 0.833322704 | 0.999071534 | Trim12a  | Trim12a  | TRIM5    | 0           | 0.118580089 | 1.548365068 | 0.416292639 | 0.457817931 | 0.291048646 | 0.064715293 | 0.552659619 | 1.257098482 | 0.392153787 |
| ENSMUSG00000055239  | 0.046511387  | 6.78961843   | 0.044224548 | 0.833436397 | 0.999071534 | Kcmf1    | Kcmf1    | KCMF1    | 116.6392157 | 118.1650585 | 125.0136492 | 120.5861012 | 119.5558826 | 111.1078206 | 137.7141445 | 123.7266722 | 92.00389512 | 110.1298552 |
| ENSMUSG00000026447  | 0.078156589  | 2.532101209  | 0.044211432 | 0.833460736 | 0.999071534 | Plk3c2b  | Plk3c2b  | PIK3C2B  | 6.456563086 | 5.395394041 | 6.664701814 | 4.232308499 | 5.886230544 | 7.785551283 | 3.882917609 | 4.490359406 | 5.421237202 | 6.601255415 |
| ENSMUSG00000054072  | 0.068074815  | 5.774198365  | 0.044196576 | 0.83348831  | 0.999071534 | Ilgp1    | Ilgp1    |          | 74.88209579 | 47.31345544 | 51.36532812 | 59.46046531 | 43.29649578 | 42.49310233 | 18.31442805 | 69.98052428 | 59.86931518 | 71.37198924 |
| ENSMUSG00000052456  | -0.04651377  | 6.225863542  | 0.044185173 | 0.833509477 | 0.999071534 | Asna1    | Asna1    | ASNA1    | 92.91836441 | 71.91882387 | 79.37053978 | 59.25231899 | 92.54462466 | 86.73249653 | 93.44888378 | 70.25685408 | 43.44846627 | 66.73150276 |
| ENSMUSG00000057421  | -0.042454739 | 5.820755449  | 0.044163068 | 0.833550518 | 0.999071534 | Las1l    | Las1l    | LAS1L    | 61.54788942 | 68.65787142 | 66.24309682 | 48.7062388  | 52.38745184 | 70.87034532 | 50.80150538 | 46.00891329 | 45.01983937 | 57.90804255 |
| ENSMUSG00000042942  | 0.09147589   | 1.900490536  | 0.044122808 | 0.833625294 | 0.999071534 | Greb1l   | Greb1l   | GREB1L   | 3.298461576 | 3.794562842 | 2.423527932 | 4.232308499 | 4.316569065 | 3.783632399 | 4.077063489 | 2.417885834 | 4.32127603  | 3.071871332 |
| ENSMUSG00000071647  | -0.047819302 | 5.3611678    | 0.044054366 | 0.833752497 | 0.999071534 | Emi3     | Emi3     | EML3     | 46.038102   | 40.8508406  | 43.15226124 | 43.57196291 | 42.44626248 | 42.85691314 | 24.65652682 | 44.35093444 | 33.78452169 | 48.2349158  |
| ENSMUSG00000009569  | 0.058942975  | 4.630090202  | 0.044022569 | 0.833811628 | 0.999071534 | Mki2     | Mki2     | MKL2     | 18.31698875 | 25.43542905 | 25.11044219 | 26.98963945 | 29.10413991 | 27.28581057 | 13.33135046 | 32.81416489 | 25.45624425 | 20.91486864 |
| ENSMUSG00000005893  | 0.04644136   | 4.837566622  | 0.043946035 | 0.833954046 | 0.999071534 | Nr2c2    | Nr2c2    | NR2C2    | 25.12445201 | 37.47130807 | 29.14965541 | 24.76941204 | 29.03873735 | 36.3083186  | 26.72741621 | 27.84022831 | 23.41345922 | 26.3396627  |
| ENSMUSG000000004748 | 0.184853722  | 0.380177855  | 0.043932662 | 0.833978944 | 0.999071534 | Mtfp1    | Mtfp1    | MTFP1    | 2.947561409 | 0.415030311 | 1.144443746 | 0           | 1.24264867  | 1.673529715 | 2.588611739 | 1.243484143 | 0.078568655 | 0.653589645 |
| ENSMUSG00000020111  | -0.045278628 | 6.32001655   | 0.043864747 | 0.834105452 | 0.999071534 | Micu1    | Micu1    | MICU1    | 90.95332347 | 94.68620092 | 70.8208718  | 67.57817178 | 98.30005008 | 94.95462079 | 83.80630506 | 77.71775894 | 45.41826265 | 83.72483353 |
| ENSMUSG00000068039  | 0.05490794   | 8.864412094  | 0.043765848 | 0.834289859 | 0.999071534 | Tcp1     | Tcp1     | TCP1     | 529.438173  | 478.9449787 | 469.8278178 | 412.8929161 | 486.6604608 | 605.5994703 | 649.7415465 | 368.2094713 | 310.267619  | 400.3890166 |
| ENSMUSG00000064284  | 0.08386055   | 2.930117544  | 0.043704438 | 0.834404473 | 0.999071534 | Cdpf1    | Cdpf1    | CDPF1    | 12.42186594 | 6.936935196 | 6.462741153 | 4.995511672 | 7.194281776 | 8.658697221 | 12.03704459 | 6.908245239 | 2.592765618 | 7.97379367  |
| ENSMUSG00000027694  | 0.234900127  | 0.817919432  | 0.043689236 | 0.834432857 | 0.999071534 | Gm8325   | Gm8325   |          | 2.38612114  | 4.802493597 | 0.06732022  | 0           | 0.523220493 | 7.931075606 | 0.841298815 | 0.828989429 | 0           | 0.261435858 |
| ENSMUSG00000030714  | -0.074694476 | 3.248560837  | 0.043650092 | 0.834505973 | 0.999071534 | Ccdc101  | Sgf29    | SGF29    | 11.15862533 | 7.648415729 | 13.53136429 | 6.799446442 | 10.98763035 | 16.15319986 | 9.319002261 | 5.802926001 | 4.478413341 | 10.26135743 |

|                    |              |              |             |             |             |               |               |          |             |             |             |             |             |             |             |             |             |             |
|--------------------|--------------|--------------|-------------|-------------|-------------|---------------|---------------|----------|-------------|-------------|-------------|-------------|-------------|-------------|-------------|-------------|-------------|-------------|
| ENSMUSG00000030342 | 0.058930427  | 8.902439315  | 0.043637129 | 0.834530192 | 0.999071534 | Cd9           | Cd9           | CD9      | 457.2930986 | 480.7829701 | 447.275544  | 546.2453249 | 495.1627938 | 326.1927701 | 630.5211044 | 482.4718475 | 443.8343326 | 425.4215    |
| ENSMUSG00000022421 | -0.066065649 | 3.807453458  | 0.043494449 | 0.834797026 | 0.999071534 | Nptxr         | Nptxr         | NPTXR    | 17.05374815 | 11.38368853 | 18.44574037 | 11.79495811 | 15.17339429 | 24.73913492 | 13.71964222 | 9.602460883 | 6.128355098 | 14.37897219 |
| ENSMUSG00000036257 | 0.052428731  | 5.336737909  | 0.043457811 | 0.834865618 | 0.999071534 | Pnpla8        | Pnpla8        | PNPLA8   | 44.63450133 | 56.38483223 | 24.5045602  | 35.24611013 | 45.32397519 | 40.67404829 | 55.33157592 | 40.4823171  | 24.74912636 | 38.36571216 |
| ENSMUSG00000090008 | -0.151612842 | 0.044816096  | 0.043449755 | 0.834880705 | 0.999071534 | Gm16111       | Gm16111       |          | 0.491260235 | 0.652190488 | 1.88496617  | 0.416292639 | 1.504258917 | 0.582097292 | 0.776583522 | 1.036236786 | 1.178529826 | 0.392153787 |
| ENSMUSG00000036270 | 0.048063819  | 5.264231103  | 0.04344902  | 0.834882081 | 0.999071534 | Edc4          | Edc4          | EDC4     | 42.73964043 | 47.84706584 | 32.71762709 | 28.72419211 | 44.47374189 | 54.71714546 | 26.08026327 | 35.78471034 | 30.64177549 | 43.39835243 |
| ENSMUSG00000091512 | 0.052905715  | 5.19182713   | 0.043439759 | 0.834899426 | 0.999071534 | Lamtor3       | Lamtor3       | LAMTOR3  | 41.33603976 | 44.94185366 | 24.70652087 | 33.51155746 | 41.66143174 | 36.81765373 | 56.49645121 | 34.19581393 | 21.60638015 | 31.69909778 |
| ENSMUSG00000032527 | 0.075557917  | 3.548105951  | 0.043340218 | 0.835085975 | 0.999071534 | Pccb          | Pccb          | PCCB     | 13.61492651 | 14.05174052 | 12.65620142 | 7.285121188 | 11.18383803 | 19.57302145 | 18.8968657  | 7.322739954 | 4.714119306 | 9.411690889 |
| ENSMUSG00000034793 | 0.045431522  | 5.098753507  | 0.043301622 | 0.83515837  | 0.999071534 | G6pc3         | G6pc3         | G6PC3    | 28.98435385 | 32.07591402 | 40.12285132 | 36.98066279 | 35.84060375 | 37.69079967 | 34.23439025 | 39.37699786 | 24.04200846 | 32.94091811 |
| ENSMUSG00000037740 | 0.069141084  | 5.457704849  | 0.043237202 | 0.835279273 | 0.999071534 | Mrps26        | Mrps26        | MRPS26   | 69.26769311 | 42.9852822  | 33.05422819 | 39.47841863 | 37.93348573 | 75.96369663 | 77.01119924 | 18.51409724 | 26.47763677 | 27.45076509 |
| ENSMUSG00000024937 | -0.047738442 | 6.70643524   | 0.043227406 | 0.835297668 | 0.999071534 | Ehbp1l1       | Ehbp1l1       | EHBP1L1  | 118.5340767 | 104.172608  | 122.1188797 | 90.0579743  | 116.9397801 | 143.705269  | 71.25153812 | 86.83664266 | 77.70439989 | 123.5938019 |
| ENSMUSG00000034973 | 0.063632065  | 3.576243407  | 0.043225319 | 0.835301586 | 0.999071534 | Dopey1        | Dopey1        | DOPEY1   | 10.59718506 | 12.56948941 | 13.93528561 | 8.325852786 | 14.71557636 | 17.17187012 | 9.189571674 | 13.40199576 | 6.992610304 | 12.81035704 |
| ENSMUSG00000072763 | 0.093010955  | 1.810614389  | 0.04319819  | 0.835352539 | 0.999071534 | 5430403G16Rik | 5430403G16Rik |          | 5.193322482 | 3.735272798 | 2.962089695 | 3.122194795 | 1.962076848 | 3.419821592 | 4.465355525 | 2.625133191 | 2.985608894 | 3.267948225 |
| ENSMUSG00000049728 | 0.067243775  | 3.373568193  | 0.043145664 | 0.835451236 | 0.999071534 | Zfp668        | Zfp668        | ZNF668   | 10.17610486 | 8.47847635  | 10.50195437 | 12.97445392 | 9.483371431 | 11.49642152 | 7.183397576 | 8.497141644 | 10.29249382 | 12.74499808 |
| ENSMUSG00000041360 | 0.0457816    | 6.451417465  | 0.043142042 | 0.835458045 | 0.999071534 | D19Bwg1357e   | Pum3          | PUM3     | 79.44379797 | 79.86368982 | 105.2888246 | 90.12735641 | 90.97496318 | 120.9307124 | 74.68144868 | 65.49016487 | 81.00428341 | 89.60714034 |
| ENSMUSG00000051674 | 0.058505003  | 3.716382364  | 0.043126315 | 0.835487609 | 0.999071534 | Dcun1d4       | Dcun1d4       | DCUN1D4  | 10.0357448  | 14.64464097 | 16.69541464 | 10.6154623  | 14.25775843 | 16.51701067 | 12.74891282 | 11.26043974 | 11.47102364 | 12.41820326 |
| ENSMUSG00000055991 | 0.079502688  | 2.883635397  | 0.043089852 | 0.835556177 | 0.999071534 | Zkscan5       | Zkscan5       | ZKSCAN5  | 7.649623656 | 8.774926572 | 6.193460271 | 4.717983245 | 9.483371431 | 8.58593506  | 3.818202315 | 10.50053276 | 4.871256616 | 8.431306421 |
| ENSMUSG00000036256 | -0.05265671  | 6.9781176    | 0.043065575 | 0.835601848 | 0.999071534 | Igfbp7        | Igfbp7        | IGFBP7   | 91.0235035  | 118.1650585 | 91.5260269  | 142.8577574 | 119.1634672 | 155.0561662 | 117.1346812 | 125.7991458 | 76.21159544 | 132.7440569 |
| ENSMUSG00000090330 | 0.092835642  | 2.347411197  | 0.043061994 | 0.835608585 | 0.999071534 | 9130221H12Rik | 9130221H12Rik |          | 3.228281543 | 6.46261484  | 5.049016526 | 4.232308499 | 5.951633105 | 4.729540499 | 1.747312924 | 7.599069763 | 3.8498641   | 6.601255415 |
| ENSMUSG00000025511 | -0.056956881 | 6.401712879  | 0.043034511 | 0.835660304 | 0.999071534 | Tspan4        | Tspan4        | TSPAN4   | 118.3937166 | 92.55175932 | 74.99472546 | 77.22228459 | 85.08873264 | 112.0537287 | 138.9437351 | 55.19687946 | 41.32711258 | 64.18250314 |
| ENSMUSG00000031545 | -0.062312603 | 7.012766724  | 0.042948493 | 0.835822287 | 0.999071534 | Agpat6        | Gpat4         | GPAT4    | 196.7848141 | 166.7236049 | 100.9130103 | 121.9043612 | 99.47729619 | 215.0121873 | 163.1472549 | 63.76310356 | 93.2609936  | 93.79011406 |
| ENSMUSG00000056153 | 0.04501553   | 5.891936528  | 0.042860487 | 0.83598819  | 0.999071534 | Soc6          | Soc6          | SOC6     | 48.56458321 | 55.55477161 | 68.59930453 | 60.15428638 | 69.58832554 | 70.14272371 | 46.33615013 | 69.49694711 | 54.05523471 | 49.73817199 |
| ENSMUSG00000071984 | 0.123072962  | 2.016517202  | 0.042801641 | 0.836099223 | 0.999071534 | Fndc1         | Fndc1         | FNDC1    | 3.930081878 | 5.573264174 | 3.635291898 | 2.914048475 | 3.400933203 | 8.003837767 | 8.412988152 | 0.483577167 | 0.864255206 | 3.267948225 |
| ENSMUSG00000060739 | 0.052814618  | 7.517097156  | 0.042738557 | 0.83621834  | 0.999071534 | Nsa2          | Nsa2          | NSA2     | 167.9408203 | 193.4634149 | 186.4096901 | 182.7524687 | 202.0939153 | 144.141842  | 165.2828595 | 216.4353234 | 165.4655876 | 193.0703811 |
| ENSMUSG00000022995 | -0.048789792 | 6.270081293  | 0.04269928  | 0.836292549 | 0.999071534 | Enah          | Enah          | ENAH     | 64.14455066 | 93.08536972 | 87.44896622 | 70.21469183 | 92.34841697 | 67.59604805 | 52.28995713 | 81.17188156 | 67.3333742  | 92.8097296  |
| ENSMUSG00000068856 | -0.045460924 | 5.956760421  | 0.042641345 | 0.836402076 | 0.999071534 | Sf3b4         | Sf3b4         | SF3B4    | 60.84608908 | 57.15560281 | 76.34112987 | 48.84500301 | 84.95792751 | 91.89861    | 57.01417356 | 54.92054965 | 41.71995586 | 55.94727362 |
| ENSMUSG00000027751 | -0.047200805 | 5.117388886  | 0.042563435 | 0.836549488 | 0.999071534 | Supt20        | Supt20        | SUPT20H  | 43.16072063 | 41.08800077 | 31.4385429  | 23.65929833 | 44.40833932 | 45.84016176 | 35.01097377 | 32.67599998 | 21.05639957 | 33.00627707 |
| ENSMUSG00000035258 | 0.117975939  | 2.692821065  | 0.042546324 | 0.836581884 | 0.999071534 | Abi3bp        | Abi3bp        | ABI3BP   | 10.17610486 | 2.668051998 | 9.76143195  | 3.885397967 | 5.166802366 | 11.64194584 | 13.59021163 | 0.967154334 | 1.885647722 | 5.620870947 |
| ENSMUSG00000038515 | -0.10942859  | 1.036724986  | 0.042540463 | 0.83659298  | 0.999071534 | Grtp1         | Grtp1         | GRTP1    | 3.158101509 | 2.312311732 | 0.942483085 | 2.289609516 | 1.63506404  | 1.964578361 | 1.812028217 | 2.417885834 | 1.571373102 | 1.111102397 |
| ENSMUSG00000016028 | 0.243314197  | -0.808110766 | 0.042520153 | 0.836631444 | 0.999071534 | Celsr1        | Celsr1        | CELSR1   | 0.280720134 | 0.296450222 | 0           | 1.110113705 | 0.327012808 | 0.654859454 | 0           | 0.483577167 | 0           | 1.241820326 |
| ENSMUSG00000076432 | 0.059982439  | 8.842537818  | 0.042454773 | 0.836755323 | 0.999071534 | Ywhaq         | Ywhaq         | YWHAQ    | 590.003542  | 486.5933944 | 380.3592449 | 420.8718583 | 460.6956439 | 547.7535519 | 766.7467971 | 324.4111964 | 276.8759406 | 387.8400954 |
| ENSMUSG00000026670 | 0.045929616  | 4.984855361  | 0.04240184  | 0.83685569  | 0.999071534 | Uap1          | Uap1          | UAP1     | 36.28307734 | 33.380295   | 23.76403778 | 32.05453323 | 35.84060375 | 41.25614558 | 36.56414082 | 29.84361943 | 19.48502646 | 30.45727746 |
| ENSMUSG00000078441 | 0.049349374  | 5.816415506  | 0.042331196 | 0.836989744 | 0.999071534 | Scamp4        | Scamp4        | SCAMP4   | 57.96870771 | 64.74472849 | 50.9614068  | 39.54780073 | 75.47455608 | 75.30883718 | 73.64600398 | 51.46642703 | 26.71334273 | 56.73158119 |
| ENSMUSG00000038250 | -0.047158488 | 4.978355013  | 0.042322137 | 0.837006942 | 0.999071534 | Usp38         | Usp38         | USP38    | 36.98487768 | 35.57402664 | 24.43723998 | 31.70762269 | 37.21405755 | 43.43901043 | 34.04024437 | 21.07014798 | 25.06340098 | 27.71220095 |
| ENSMUSG00000085566 | 0.091513076  | 2.29226141   | 0.042320882 | 0.837009325 | 0.999071534 | A730017L22Rik | A730017L22Rik |          | 3.930081878 | 5.869714396 | 2.01960661  | 5.411804311 | 5.624620297 | 7.712789121 | 2.9769035   | 4.490359406 | 2.199922343 | 6.143742663 |
| ENSMUSG00000082064 | 0.073712678  | 3.519704632  | 0.042320301 | 0.837010427 | 0.999071534 | Gm14217       | Rpl5-ps2      |          | 11.2989854  | 16.30476221 | 13.32940363 | 10.12978756 | 6.213243352 | 8.222124252 | 14.8845175  | 7.737234668 | 12.33527885 | 11.63389568 |
| ENSMUSG00000034807 | 0.067770417  | 6.426687941  | 0.042316251 | 0.837018117 | 0.999071534 | Colgalt1      | Colgalt1      | COLGALT1 | 110.814273  | 121.7817512 | 60.79015897 | 66.46805807 | 77.69824318 | 149.8172906 | 151.1749256 | 48.01230441 | 37.08440521 | 59.21522184 |
| ENSMUSG00000031930 | -0.044765568 | 6.600898136  | 0.042254454 | 0.837135498 | 0.999071534 | Wwp2          | Wwp2          | WWP2     | 105.7613105 | 102.0974565 | 117.8103856 | 96.78803864 | 88.22805559 | 106.2327558 | 72.28698282 | 92.57048621 | 80.61144013 | 108.7573169 |
| ENSMUSG00000029468 | -0.047924646 | 4.510606922  | 0.042204837 | 0.83722981  | 0.999071534 | P2rx7         | P2rx7         | P2RX7    | 22.73833087 | 25.67258923 | 21.20586941 | 25.6019732  | 24.19894779 | 30.48734568 | 21.8090539  | 21.55372515 | 17.83508471 | 17.18940766 |
| ENSMUSG00000053820 | 0.197473388  | -0.199980169 | 0.042196959 | 0.837244789 | 0.999071534 | Bcl2a1c       | Bcl2a1c       | BCL2A1   | 2.17558104  | 0.177870133 | 0.269280881 | 0.138764213 | 0.915635862 | 0.654859454 | 0           | 0.967154334 | 1.099961171 | 0.980384468 |

|                     |              |              |             |             |             |               |               |                |             |             |             |             |             |             |             |             |             |             |
|---------------------|--------------|--------------|-------------|-------------|-------------|---------------|---------------|----------------|-------------|-------------|-------------|-------------|-------------|-------------|-------------|-------------|-------------|-------------|
| ENSMUSG00000029033  | 0.05574559   | 4.299690366  | 0.04212247  | 0.8373865   | 0.999071534 | Acap3         | Acap3         | ACAP3          | 20.98383003 | 18.32062372 | 25.91828483 | 10.82360862 | 24.19894779 | 25.97609166 | 15.9199622  | 16.57978857 | 18.07079067 | 20.19592003 |
| ENSMUSG00000028370  | 0.185868098  | -0.464958159 | 0.042049892 | 0.837524699 | 0.999071534 | Pappa         | Pappa         | PAPPA          | 0.421080201 | 1.363671021 | 0.673202203 | 0.138764213 | 0.261610246 | 0.218286485 | 1.035444696 | 1.381649048 | 0.15713731  | 0.196076894 |
| ENSMUSG00000001473  | -0.052375048 | 7.696799024  | 0.042034718 | 0.837553608 | 0.999071534 | Tubb6         | Tubb6         | TUBB6          | 223.6637669 | 178.5223237 | 243.2279561 | 213.9744166 | 236.299455  | 329.9036403 | 207.7360921 | 163.5181648 | 149.9089939 | 157.7765403 |
| ENSMUSG000000045822 | 0.108942662  | 1.588727704  | 0.041933358 | 0.837746856 | 0.999071534 | Zswim3        | Zswim3        | ZSWIM3         | 2.38612114  | 3.913142931 | 1.616585288 | 2.497755836 | 3.989556257 | 2.910486461 | 3.494625848 | 4.835771668 | 2.357059653 | 0.71894861  |
| ENSMUSG00000031511  | -0.04969727  | 5.381646941  | 0.04172524  | 0.838144412 | 0.999071534 | Arhgef7       | Arhgef7       | ARHGEF7        | 51.65250469 | 44.28966317 | 40.86337375 | 38.29892282 | 44.93155982 | 78.72865877 | 33.52252202 | 32.39967017 | 22.3920667  | 39.47681456 |
| ENSMUSG00000020211  | 0.053996315  | 5.689546573  | 0.041720866 | 0.838152777 | 0.999071534 | Sf3a2         | Sf3a2         | SF3A2          | 32.0020953  | 43.51889259 | 65.90649571 | 45.65342611 | 75.47455608 | 62.28441026 | 32.7459385  | 65.21383506 | 37.63438579 | 56.99301705 |
| ENSMUSG00000074738  | -0.148660404 | -0.047489337 | 0.041664637 | 0.838260372 | 0.999071534 | B930041F14Rik | B930041F14Rik | FNDCl0         | 0.771980369 | 1.48225111  | 0.740522424 | 0.555056852 | 0.981038424 | 1.382481069 | 1.29430587  | 0.207247357 | 0.235705965 | 0.849666539 |
| ENSMUSG00000038086  | -0.063269266 | 3.987221321  | 0.041658695 | 0.838271747 | 0.999071534 | Hspb2         | Hspb2         | HSPB2-C11orf52 | 16.49230788 | 15.17825137 | 16.15685288 | 21.36968882 | 13.73453794 | 9.750129644 | 14.04321869 | 21.34647779 | 13.74951464 | 13.59466462 |
| ENSMUSG00000021910  | 0.062324568  | 8.124763637  | 0.0416437   | 0.838300453 | 0.999071534 | Nisch         | Nisch         | NISCH          | 272.7196103 | 313.1700146 | 285.1684534 | 230.9730327 | 319.1645006 | 260.0519653 | 137.1964222 | 402.1980378 | 211.8210941 | 355.422049  |
| ENSMUSG00000048271  | 0.043850196  | 5.329071868  | 0.041640547 | 0.838306491 | 0.999071534 | Rbm33         | Rbm33         | RBM33          | 40.28333925 | 48.49925632 | 37.49736273 | 39.2008902  | 39.37234208 | 46.34949689 | 31.12805616 | 48.84129384 | 32.68456052 | 37.58140459 |
| ENSMUSG00000045671  | 0.051947301  | 5.128690726  | 0.041620389 | 0.838345093 | 0.999071534 | Spred2        | Spred2        | SPRED2         | 28.91417382 | 42.68883197 | 42.07513771 | 23.3123878  | 41.46522405 | 36.38108076 | 23.87994329 | 47.66689215 | 29.38467701 | 33.00627707 |
| ENSMUSG00000025153  | 0.060345792  | 6.616816667  | 0.041618877 | 0.83834799  | 0.999071534 | Fasn          | Fasn          | FASN           | 90.88314344 | 76.54344733 | 98.01824082 | 124.4714991 | 105.8867472 | 187.8719011 | 61.80310527 | 47.11423253 | 95.61805325 | 103.5285998 |
| ENSMUSG00000022452  | -0.046782733 | 6.537662203  | 0.041604179 | 0.838376142 | 0.999071534 | Smdt1         | Smdt1         | SMDT1          | 97.83096676 | 65.39691898 | 112.4920882 | 116.0762643 | 95.48773993 | 95.10014511 | 90.14840382 | 80.41197459 | 77.54726258 | 96.27375472 |
| ENSMUSG00000027193  | -0.04824016  | 6.839940472  | 0.041541162 | 0.838496906 | 0.999071534 | Api5          | Api5          | API5           | 133.833324  | 137.2564528 | 117.0698632 | 95.46977861 | 122.4335953 | 161.6047607 | 146.9684315 | 89.32361095 | 68.51186725 | 91.17575548 |
| ENSMUSG00000024127  | 0.059346653  | 4.70660763   | 0.041501714 | 0.83857255  | 0.999071534 | Prepl         | Prepl         | PREPL          | 34.59875654 | 32.07591402 | 20.59998742 | 20.81463196 | 24.59136316 | 47.58645364 | 36.30527964 | 18.09960253 | 15.08518178 | 16.40510009 |
| ENSMUSG00000078786  | 0.07714507   | 3.122092467  | 0.041462485 | 0.838647813 | 0.999071534 | BC024978      | BC024978      | C19orf54       | 6.246022985 | 6.344034752 | 10.9058757  | 10.6154623  | 8.960150939 | 7.785551283 | 4.594785837 | 10.84594503 | 9.821081887 | 8.431306421 |
| ENSMUSG00000050332  | -0.060865346 | 4.724512086  | 0.041418406 | 0.838732426 | 0.999071534 | Amer1         | Amer1         | AMER1          | 24.56301174 | 17.37198301 | 37.90128405 | 33.65032168 | 25.11458365 | 22.1196971  | 14.36679515 | 29.36004227 | 23.1775325  | 33.46378983 |
| ENSMUSG00000031628  | -0.101793051 | 5.018012039  | 0.041411231 | 0.838746202 | 0.999071534 | Casp3         | Casp3         | CASP3          | 53.68772566 | 54.01323045 | 14.81044848 | 15.19468133 | 37.86808316 | 55.95410221 | 68.85707226 | 18.09960253 | 5.028393926 | 12.35284429 |
| ENSMUSG00000025260  | -0.052303789 | 7.09845501   | 0.041388234 | 0.838790369 | 0.999071534 | Hsd17b10      | Hsd17b10      | HSD17B10       | 153.2030132 | 125.6948941 | 131.678351  | 155.9015934 | 156.3121222 | 95.17290727 | 179.6496547 | 122.0686934 | 102.9249382 | 142.2211068 |
| ENSMUSG00000007216  | -0.096368939 | 1.688123364  | 0.041325316 | 0.838911271 | 0.999071534 | Zfp775        | Zfp775        | ZNF775         | 4.210802013 | 4.03172302  | 2.154247051 | 3.538487434 | 2.616102464 | 3.274297269 | 1.812028217 | 3.592287524 | 1.414235792 | 4.509768551 |
| ENSMUSG00000030204  | -0.042882    | 5.859206297  | 0.041305042 | 0.838950249 | 0.999071534 | Ddx47         | Ddx47         | DDX47          | 67.09211207 | 58.57856387 | 62.40584426 | 54.25680732 | 63.37508219 | 81.4936209  | 65.94488406 | 50.91376741 | 30.87748145 | 54.05186365 |
| ENSMUSG00000005505  | 0.059282718  | 3.624436632  | 0.041281312 | 0.838995883 | 0.999071534 | Kbtbd4        | Kbtbd4        | KBTBD4         | 10.94808523 | 12.45090933 | 10.43463415 | 11.03175494 | 17.33167882 | 16.00767553 | 14.04321869 | 9.602460883 | 10.44963113 | 10.52279329 |
| ENSMUSG00000072946  | 0.054709415  | 4.828704439  | 0.04120923  | 0.839134589 | 0.999071534 | Ptgr2         | Ptgr2         | RP5-1021l20.4  | 34.38821644 | 34.32893571 | 22.75423448 | 23.93682676 | 29.16954247 | 35.72622131 | 46.46558072 | 17.75419027 | 18.30649664 | 23.52922722 |
| ENSMUSG00000018800  | -0.059663986 | 4.922436926  | 0.041192214 | 0.839167352 | 0.999071534 | Abca5         | Abca5         | ABCA5          | 19.29950922 | 51.04872823 | 29.35161607 | 25.67137942 | 34.92496789 | 22.41074575 | 31.06334087 | 41.10405917 | 24.74912636 | 21.11094554 |
| ENSMUSG00000021175  | 0.058260457  | 4.625574822  | 0.041145745 | 0.839256856 | 0.999071534 | Cdca7l        | Cdca7l        | CDCA7L         | 31.72137516 | 17.31269297 | 30.29409915 | 21.2309246  | 24.59136316 | 45.47635095 | 26.14497857 | 12.64208879 | 17.91365336 | 23.2024324  |
| ENSMUSG00000010277  | -0.050369802 | 6.688932002  | 0.041129431 | 0.839288293 | 0.999071534 | 2610507B11Rik | 2610507B11Rik | KIAA0100       | 149.9045516 | 138.0272234 | 118.2816271 | 98.10629866 | 114.4544828 | 205.7713928 | 103.3503237 | 76.88876951 | 75.66161486 | 113.1363676 |
| ENSMUSG00000090744  | 0.167950014  | 0.023196505  | 0.041031326 | 0.839477467 | 0.999071534 | Gm6871        | Gm6871        | ZNF788         | 1.543960738 | 0.474320355 | 0.06732022  | 1.040731598 | 1.177246109 | 1.746291877 | 1.876743511 | 0.621742072 | 0.235705965 | 0.261435858 |
| ENSMUSG00000036097  | 0.048523213  | 4.835390073  | 0.041020592 | 0.839498179 | 0.999071534 | Fam178a       | Fam178a       | SLF2           | 27.15967298 | 32.60952442 | 34.7372337  | 18.45564034 | 32.83208592 | 42.12929152 | 30.93391028 | 27.01123889 | 18.62077126 | 24.1174579  |
| ENSMUSG00000072969  | 0.073188481  | 2.677925227  | 0.040928844 | 0.839675334 | 0.999071534 | Armxc5        | Armxc5        | ARMCX5         | 6.456563086 | 5.336103997 | 7.270583797 | 5.550568524 | 7.128879214 | 5.020589145 | 6.277383467 | 6.493750525 | 6.521198373 | 6.078383699 |
| ENSMUSG00000028670  | 0.042712948  | 5.884946717  | 0.040927904 | 0.83967715  | 0.999071534 | Lypla2        | Lypla2        | LYPLA2         | 59.65302851 | 48.97357668 | 65.43525417 | 55.36692103 | 72.46603825 | 71.30691829 | 45.10655956 | 52.50266382 | 52.48386161 | 67.90796412 |
| ENSMUSG00000028163  | -0.04632357  | 6.607179129  | 0.040901302 | 0.839728554 | 0.999071534 | Nfkb1         | Nfkb1         | NFKB1          | 109.5510324 | 109.0343917 | 96.73915663 | 92.00067328 | 107.1293959 | 158.0394148 | 68.79235697 | 82.34628325 | 61.83353156 | 105.9468815 |
| ENSMUSG00000084883  | -0.184661642 | 1.078952897  | 0.040894303 | 0.839742082 | 0.999071534 | Ccdc85c       | Ccdc85c       | CCDC85C        | 4.631882214 | 4.328173242 | 0           | 0.485674746 | 1.569661478 | 5.675448599 | 3.106334087 | 0.414494714 | 0.235705965 | 0.457512752 |
| ENSMUSG00000055148  | -0.056845729 | 4.072293797  | 0.040887163 | 0.839755883 | 0.999071534 | Klf2          | Klf2          | KLF2           | 19.58022936 | 12.6880695  | 21.07122897 | 16.72108768 | 18.31271725 | 22.55627007 | 10.41916225 | 15.33630443 | 11.31388633 | 20.71879175 |
| ENSMUSG00000032507  | -0.069289312 | 3.032438852  | 0.040832754 | 0.839861092 | 0.999071534 | Fbxl2         | Fbxl2         | FBXL2          | 9.474304528 | 7.292675462 | 9.559471289 | 8.811527532 | 7.586697145 | 6.985167506 | 6.536244641 | 10.43145031 | 5.185531236 | 8.692742279 |
| ENSMUSG00000034595  | -0.049574417 | 6.82957718   | 0.040828091 | 0.839870113 | 0.999071534 | Ppp1r18       | Ppp1r18       | PPP1R18        | 110.1826527 | 151.6046435 | 110.2705209 | 82.84223522 | 148.3984123 | 148.7258582 | 115.5815142 | 121.6541987 | 56.80513764 | 109.8030604 |
| ENSMUSG00000026603  | -0.042775283 | 5.833806962  | 0.040809398 | 0.83990628  | 0.999071534 | Smyd2         | Smyd2         | SMYD2          | 65.19725116 | 58.22282361 | 55.20258068 | 55.43630313 | 66.2527949  | 69.70615074 | 74.22844162 | 43.2456152  | 35.19875748 | 53.13683814 |
| ENSMUSG00000038240  | -0.059713432 | 3.769779191  | 0.040806596 | 0.8399117   | 0.999071534 | Pds2          | Pds2          | PDSS2          | 12.49204597 | 11.50226861 | 13.59868451 | 17.06799821 | 16.67765321 | 15.93491337 | 17.861421   | 10.22402095 | 10.68533709 | 9.607767782 |
| ENSMUSG00000087598  | -0.070568291 | 3.227156969  | 0.04077231  | 0.839978059 | 0.999071534 | Zfp111        | Zfp111        |                | 7.088183388 | 7.707705773 | 9.559471289 | 11.51742969 | 13.08051232 | 14.47967014 | 9.642578728 | 7.806317121 | 7.306884924 | 5.163358196 |
| ENSMUSG00000061273  | 0.049617239  | 5.976189503  | 0.040757392 | 0.840006942 | 0.999071534 | Mmgt1         | Mmgt1         | MMGT1          | 64.42527079 | 67.59065062 | 58.97251302 | 54.74248207 | 75.73616633 | 90.51612893 | 96.94350963 | 45.04175896 | 35.82730672 | 49.14994131 |

|                    |              |              |             |             |             |               |               |         |             |             |             |             |             |             |             |             |             |             |
|--------------------|--------------|--------------|-------------|-------------|-------------|---------------|---------------|---------|-------------|-------------|-------------|-------------|-------------|-------------|-------------|-------------|-------------|-------------|
| ENSMUSG00000056629 | 0.056818574  | 6.775526565  | 0.040754037 | 0.840013438 | 0.999071534 | Fkbp2         | Fkbp2         | FKBP2   | 106.3227508 | 62.01738645 | 146.0848781 | 136.3358394 | 102.8128268 | 86.00487492 | 100.6969967 | 91.05067226 | 114.3959618 | 134.7048258 |
| ENSMUSG00000063535 | -0.1706842   | -0.364469595 | 0.040739866 | 0.84004088  | 0.999071534 | Zfp773        | Zfp773        |         | 0.561440268 | 0.237160178 | 0.740522424 | 1.595788451 | 0.327012808 | 0.800383777 | 0.258861174 | 0.759906976 | 0.078586655 | 1.111102397 |
| ENSMUSG00000079722 | -0.248460566 | -0.826248681 | 0.040698818 | 0.840120396 | 0.999071534 | TtlI2         | TtlI2         | TTLI2   | 0.140360067 | 0.415030311 | 0.06732022  | 1.110113705 | 0.654025616 | 0.072762162 | 0           | 1.657978857 | 0           | 0.130717929 |
| ENSMUSG00000020721 | 0.065899332  | 5.355056512  | 0.04069697  | 0.840123977 | 0.999071534 | Helz          | Helz          | HELZ    | 26.73859278 | 32.19449411 | 53.92349649 | 47.04106824 | 46.10880593 | 36.81765373 | 14.81980221 | 41.86396615 | 51.22676312 | 50.65319749 |
| ENSMUSG00000032599 | -0.047354993 | 5.324957965  | 0.040691214 | 0.840135131 | 0.999071534 | Ip6k2         | Ip6k2         | IP6K2   | 38.66919848 | 37.35272798 | 47.12415424 | 47.52674299 | 39.37234208 | 37.90908615 | 26.66270091 | 45.45625368 | 30.24893221 | 48.69242856 |
| ENSMUSG00000066568 | 0.045035439  | 6.870329801  | 0.040672786 | 0.840170845 | 0.999071534 | Lsm14a        | Lsm14a        | LSM14A  | 111.0248131 | 147.3950504 | 101.2496114 | 104.6975988 | 134.2060564 | 130.8263664 | 121.6000364 | 123.8648371 | 98.05368156 | 98.62667744 |
| ENSMUSG00000050188 | 0.053674944  | 4.132296902  | 0.040615445 | 0.840282032 | 0.999071534 | Lsm10         | Lsm10         | LSM10   | 19.01878909 | 14.94109119 | 16.69541464 | 19.0800793  | 18.83593774 | 14.62519447 | 23.03864448 | 17.61602536 | 12.72812213 | 17.18940766 |
| ENSMUSG00000067370 | -0.100218584 | 1.562406412  | 0.040587827 | 0.840335613 | 0.999071534 | B3galt4       | B3galt4       | B3GALT4 | 5.54422265  | 3.083082309 | 1.615685288 | 1.595788451 | 3.466335765 | 2.692199976 | 3.429910554 | 1.72706131  | 2.042785033 | 3.267948225 |
| ENSMUSG00000021687 | 0.045805462  | 5.640524786  | 0.040480388 | 0.840544236 | 0.999071534 | Scamp1        | Scamp1        | SCAMP1  | 38.87973858 | 66.34555969 | 43.21958146 | 55.15877471 | 49.96755706 | 45.84016176 | 44.32997603 | 56.85485832 | 45.88409458 | 48.03883891 |
| ENSMUSG00000018347 | -0.071446493 | 3.184624157  | 0.040473905 | 0.840556834 | 0.999071534 | Zkscan6       | Zkscan6       | ZNF18   | 8.140883891 | 13.87387039 | 9.82875217  | 4.717983245 | 11.44544828 | 8.513172898 | 9.901439902 | 8.35897674  | 5.342668547 | 10.32671639 |
| ENSMUSG00000043987 | 0.053719921  | 4.316054032  | 0.040418364 | 0.840664802 | 0.999071534 | Cep164        | Cep164        | CEP164  | 20.42238976 | 14.8225111  | 21.74443117 | 22.06350988 | 21.51744277 | 27.06752409 | 14.30207986 | 14.3691501  | 21.05639957 | 20.52271485 |
| ENSMUSG00000021911 | -0.046354743 | 4.950770877  | 0.04037487  | 0.840749408 | 0.999071534 | Parg          | Parg          | PARG    | 32.4231755  | 35.98905696 | 38.10324471 | 22.06350988 | 34.53255252 | 39.94642668 | 34.04024437 | 23.211704   | 26.32049946 | 23.98673997 |
| ENSMUSG00000029201 | 0.053365232  | 7.513083147  | 0.040331448 | 0.84083392  | 0.999071534 | Ugdh          | Ugdh          | UGDH    | 144.8515892 | 201.8233112 | 213.8090198 | 171.7900958 | 197.6465411 | 149.7445284 | 148.7804597 | 230.5281436 | 170.651189  | 181.4364855 |
| ENSMUSG00000027709 | 0.065579919  | 3.289726108  | 0.04026166  | 0.840969848 | 0.999071534 | Mccc1         | Mccc1         | MCCC1   | 8.000523824 | 13.2216799  | 11.30979702 | 5.550568524 | 11.11843547 | 11.3508972  | 9.448432848 | 9.049801264 | 7.85686551  | 10.1306395  |
| ENSMUSG00000028991 | 0.044047068  | 5.255462721  | 0.040257003 | 0.840978921 | 0.999071534 | Mtor          | Mtor          | MTOR    | 30.80903472 | 46.42410477 | 33.12154841 | 36.98066279 | 47.41685716 | 43.73005907 | 31.38691734 | 37.16635939 | 32.52742321 | 41.89509625 |
| ENSMUSG00000004994 | -0.062374019 | 3.549402536  | 0.040253599 | 0.840985555 | 0.999071534 | Ccdc130       | Ccdc130       | CCDC130 | 12.49204597 | 11.73942879 | 9.155549966 | 14.98653501 | 12.81890207 | 10.55051342 | 9.189571674 | 14.99089217 | 8.17114013  | 11.56853672 |
| ENSMUSG00000021482 | -0.075298584 | 3.696404584  | 0.040173794 | 0.84114116  | 0.999071534 | Aaed1         | Aaed1         | AAED1   | 15.08870721 | 21.99660648 | 4.847055865 | 12.97445392 | 13.60373281 | 12.22404314 | 19.8675951  | 12.9184186  | 6.992610304 | 8.888819173 |
| ENSMUSG00000029439 | -0.051131648 | 5.433598766  | 0.04009296  | 0.841298934 | 0.999071534 | Sfswap        | Sfswap        | SFSWAP  | 40.14297919 | 36.10763704 | 51.90388988 | 52.9385473  | 45.58558543 | 44.96701582 | 22.32677625 | 44.21276953 | 39.28432755 | 51.96037678 |
| ENSMUSG00000021018 | 0.054177721  | 5.534725177  | 0.040088037 | 0.841308549 | 0.999071534 | Polr2h        | Polr2h        | POLR2H  | 62.17950972 | 44.17108308 | 42.54637926 | 49.95511672 | 36.36382425 | 48.45959957 | 81.47655449 | 35.57746298 | 25.29910694 | 39.99968628 |
| ENSMUSG00000020930 | 0.172362199  | -0.129558888 | 0.040074306 | 0.841335368 | 0.999071534 | Ccdc103       | Ccdc103       | FAM187A | 0.491260235 | 1.422961066 | 0           | 0.763203172 | 1.111843547 | 1.091432423 | 0.388291761 | 0.345412262 | 0.471411931 | 1.764692042 |
| ENSMUSG00000027883 | -0.044459788 | 6.530110536  | 0.040047711 | 0.841387324 | 0.999071534 | Gpsm2         | Gpsm2         | GPSM2   | 95.93610585 | 81.10878075 | 91.62281989 | 105.1138914 | 112.034588  | 102.3035991 | 69.05121814 | 81.72454118 | 89.72540412 | 92.8097296  |
| ENSMUSG00000097915 | 0.107753258  | 1.148516964  | 0.039979165 | 0.841521324 | 0.999071534 | A330009N23Rik | A330009N23Rik |         | 2.17558104  | 3.260952442 | 1.009803305 | 1.457024238 | 2.550699902 | 2.692199976 | 3.559341141 | 1.934308667 | 1.414235792 | 0.980384468 |
| ENSMUSG00000038187 | 0.061608611  | 3.985094561  | 0.039970478 | 0.841538314 | 0.999071534 | Btbd10        | Btbd10        | BTBD10  | 13.40438641 | 14.58535092 | 14.74312825 | 19.01069719 | 17.78949675 | 25.32123221 | 22.58563742 | 13.81649048 | 7.306848924 | 11.37245982 |
| ENSMUSG00000022378 | 0.054975917  | 7.396814725  | 0.039924708 | 0.841627864 | 0.999071534 | Fam49b        | Fam49b        | FAM49B  | 194.2583328 | 151.9010938 | 171.7338821 | 167.0027305 | 172.8589703 | 243.0256195 | 256.013701  | 96.50818599 | 112.7460201 | 141.1100044 |
| ENSMUSG00000037161 | 0.12151973   | 4.202764666  | 0.039895135 | 0.841685754 | 0.999071534 | Mgarp         | Mgarp         | MGARP   | 8.070703857 | 33.32100496 | 10.9058757  | 19.01069719 | 19.48996336 | 1.600767553 | 4.853647011 | 44.55818179 | 9.271101302 | 28.69258542 |
| ENSMUSG00000031349 | 0.050133187  | 4.616800398  | 0.039868914 | 0.8417371   | 0.999071534 | Nsdhl         | Nsdhl         | NSDHL   | 26.17715251 | 23.12311732 | 23.22547602 | 19.77390037 | 32.76668336 | 35.94450779 | 26.85684679 | 18.99767441 | 13.43524002 | 28.1697137  |
| ENSMUSG00000098021 | -0.152587886 | -0.002887701 | 0.039848787 | 0.841776525 | 0.999071534 | Gm9522        | Gm9522        |         | 0.140360067 | 0.948640711 | 0.673202203 | 1.595788451 | 1.308051232 | 0.363810808 | 0.711868228 | 1.312566595 | 0.392843275 | 1.111102397 |
| ENSMUSG00000004815 | 0.091574673  | 3.10594333   | 0.039802298 | 0.841867628 | 0.999071534 | Dgkq          | Dgkq          | DGKQ    | 12.562226   | 11.68013875 | 7.203263577 | 2.705902155 | 8.960150939 | 12.51509178 | 8.348272859 | 6.217420715 | 2.121353688 | 14.83648494 |
| ENSMUSG00000033096 | 0.055030288  | 4.713012563  | 0.039796998 | 0.841878018 | 0.999071534 | Apmap         | Apmap         | APMAP   | 30.38795452 | 31.54230362 | 19.32090324 | 24.49188361 | 27.46907587 | 39.87366451 | 38.95860667 | 21.34647779 | 12.09957289 | 20.78415071 |
| ENSMUSG00000002984 | 0.052040539  | 5.872971062  | 0.039782276 | 0.841906881 | 0.999071534 | Tomm40        | Tomm40        | TOMM40  | 72.84687482 | 49.8036373  | 61.39604095 | 51.55090517 | 63.24427706 | 104.7775126 | 79.98810274 | 32.74508243 | 37.00583655 | 44.3787369  |
| ENSMUSG00000031337 | 0.059656187  | 3.655601704  | 0.039765463 | 0.841939852 | 0.999071534 | Mtm1          | Mtm1          | MTM1    | 11.9306057  | 13.04380977 | 14.47384737 | 10.68484441 | 13.34212257 | 10.4049891  | 13.71964222 | 16.92520084 | 9.899650542 | 9.86920364  |
| ENSMUSG00000020496 | 0.050551023  | 6.807578098  | 0.039735084 | 0.841999443 | 0.999071534 | Rnf187        | Rnf187        | RNF187  | 144.290149  | 114.7262359 | 105.3561448 | 94.70657544 | 113.4734444 | 177.466912  | 148.6510291 | 66.73364901 | 69.76896573 | 104.901138  |
| ENSMUSG00000035370 | -0.083376812 | 2.371852366  | 0.039694118 | 0.842079839 | 0.999071534 | Adat3         | Adat3         | ADAT3   | 4.631882214 | 4.446753331 | 8.145746661 | 5.550568524 | 4.054958819 | 7.494502637 | 4.788931717 | 4.766689215 | 4.635550651 | 2.222204793 |
| ENSMUSG00000029998 | -0.049228491 | 6.144113772  | 0.039664075 | 0.842138826 | 0.999071534 | Pcyox1        | Pcyox1        | PCYOX1  | 72.42579462 | 100.7337854 | 57.49146817 | 71.39418764 | 70.96177933 | 91.02546406 | 102.5090249 | 54.09156022 | 41.56281855 | 53.33291504 |
| ENSMUSG00000024608 | -0.059445981 | 10.34367378  | 0.039644066 | 0.842178125 | 0.999071534 | Rps14         | Rps14         | RPS14   | 1877.526437 | 1486.045673 | 1216.611022 | 1277.047053 | 1034.603122 | 1049.957991 | 2058.011048 | 988.6389762 | 933.9456031 | 1094.566579 |
| ENSMUSG00000061477 | 0.092801056  | 4.237965745  | 0.039614414 | 0.842236383 | 0.999071534 | Rps7          | Rps7          | RPS7    | 41.89748002 | 20.75151554 | 11.04051614 | 8.672763319 | 12.88430463 | 28.15895651 | 42.51794782 | 11.32952219 | 7.228316269 | 8.039152634 |
| ENSMUSG00000032186 | 0.137217146  | 1.159564752  | 0.039585971 | 0.842292287 | 0.999071534 | Tmod2         | Tmod2         | TMOD2   | 1.684320805 | 1.245090933 | 2.423527932 | 3.122194795 | 1.765869163 | 8.294886414 | 0.970729402 | 0.345412262 | 0.549980586 | 1.830051006 |
| ENSMUSG00000031358 | -0.044178976 | 5.879773619  | 0.039584356 | 0.842295461 | 0.999071534 | Msl3          | Msl3          | MSL3    | 71.02219394 | 73.46036502 | 45.91239027 | 55.29753892 | 64.81393854 | 61.77507513 | 79.14680393 | 52.77899363 | 38.89148427 | 48.95386441 |
| ENSMUSG00000043342 | 0.133487304  | 0.286327505  | 0.039583089 | 0.842297951 | 0.999071534 | Hoxd9         | Hoxd9         | HOXD9   | 0.631620302 | 1.304380977 | 1.548365068 | 0.693821065 | 1.24264867  | 0.800383777 | 0.841298815 | 0.621742072 | 2.121353688 | 0.849666539 |

|                     |              |              |             |             |             |               |               |          |             |             |             |             |             |             |             |             |             |             |
|---------------------|--------------|--------------|-------------|-------------|-------------|---------------|---------------|----------|-------------|-------------|-------------|-------------|-------------|-------------|-------------|-------------|-------------|-------------|
| ENSMUSG00000029553  | 0.117936755  | 2.408083597  | 0.039422064 | 0.842614844 | 0.999071534 | Tfec          | Tfec          | TFEC     | 8.491784059 | 5.454684085 | 4.981696305 | 2.983430582 | 3.989556257 | 9.09527019  | 10.28973166 | 3.039627905 | 0.15713731  | 5.097999231 |
| ENSMUSG000000031792 | 0.05608631   | 4.296801891  | 0.0393991   | 0.842660093 | 0.999071534 | Usb1          | Usb1          | USB1     | 27.44039311 | 21.70015625 | 13.86796539 | 13.8070392  | 23.28331193 | 25.53951869 | 24.91538799 | 21.89913741 | 10.68533709 | 15.0979208  |
| ENSMUSG000000000126 | 0.066692243  | 3.108891687  | 0.0393049   | 0.842845843 | 0.999071534 | Wnt9a         | Wnt9a         | WNT9A    | 7.789983723 | 9.427117061 | 8.482347763 | 5.411804311 | 12.23027902 | 8.367648575 | 8.607134033 | 8.980718811 | 7.542590889 | 8.169870563 |
| ENSMUSG000000090576 | 0.196875204  | -0.520425071 | 0.039241707 | 0.842970583 | 0.999071534 | Gm17055       | Gm17055       |          | 0.491260235 | 1.422961066 | 0.06732022  | 0.20814632  | 0.588623054 | 0.436572969 | 0           | 0.690824524 | 1.178529826 | 0.457512752 |
| ENSMUSG000000028776 | 0.060797595  | 4.167779708  | 0.039162336 | 0.843127403 | 0.999071534 | Tinagl1       | Tinagl1       | TINAGL1  | 18.10644865 | 21.2258359  | 20.93658853 | 9.227820171 | 21.84445557 | 16.95358363 | 14.69037162 | 28.32380548 | 13.04239675 | 14.50969012 |
| ENSMUSG000000033405 | 0.198815409  | -0.273772439 | 0.039099931 | 0.84325082  | 0.999071534 | Nudt15        | Nudt15        | NUDT15   | 0.350900168 | 1.363671021 | 0.201960661 | 0.346910533 | 1.046440986 | 1.528005392 | 1.48845175  | 0           | 0           | 0.784307574 |
| ENSMUSG000000032501 | -0.03967787  | 5.75820785   | 0.039083806 | 0.843282726 | 0.999071534 | Trib1         | Trib1         | TRIB1    | 61.75842952 | 61.78022627 | 55.80846266 | 44.82084083 | 60.95518741 | 70.94310748 | 41.93551017 | 49.73936572 | 42.81991703 | 54.3132995  |
| ENSMUSG000000063458 | 0.110311298  | 1.532386834  | 0.038980789 | 0.843486726 | 0.999071534 | 1700112E06Rik | 1700112E06Rik | C10orf11 | 2.17558104  | 3.023792265 | 1.211763966 | 4.301690606 | 2.943115272 | 1.673529715 | 2.523896446 | 4.835771668 | 0.707117896 | 4.117614764 |
| ENSMUSG000000019734 | 0.101699082  | 1.927342564  | 0.038935922 | 0.843575662 | 0.999071534 | Tmc4          | Tmc4          | TMC4     | 2.666841275 | 1.719411288 | 6.664701814 | 3.677251647 | 3.597140888 | 3.565345915 | 1.164875283 | 5.18118393  | 3.064177549 | 5.22871716  |
| ENSMUSG000000025487 | -0.090685637 | 6.673164089  | 0.038908368 | 0.843630306 | 0.999071534 | Psmc13        | Psmc13        | PSMD13   | 208.5048797 | 117.453578  | 68.26270343 | 68.75676759 | 87.44322485 | 179.9408254 | 217.1845249 | 30.25811415 | 29.2257397  | 50.06496681 |
| ENSMUSG000000031303 | 0.10078009   | 1.050070614  | 0.038903378 | 0.843640205 | 0.999071534 | Map3k15       | Map3k15       | MAP3K15  | 1.684320805 | 1.778701332 | 2.423527932 | 2.22022741  | 1.569661478 | 2.473913492 | 1.423736457 | 1.865226215 | 2.514196963 | 1.30717929  |
| ENSMUSG000000053774 | -0.048546929 | 5.975019358  | 0.038885307 | 0.843676056 | 0.999071534 | Ubxn7         | Ubxn7         | UBXN7    | 61.05662918 | 89.0536467  | 58.63591192 | 50.44079146 | 73.51247923 | 66.86842644 | 68.4687805  | 82.2772008  | 30.0917949  | 54.64009433 |
| ENSMUSG000000097530 | -0.333140772 | -0.804966054 | 0.038780806 | 0.843883546 | 0.999071534 | Kansl2-ps     | Kansl2-ps     |          | 1.754500839 | 0.770770577 | 0           | 0           | 0           | 2.110102684 | 0           | 0           | 0.078568655 | 0           |
| ENSMUSG000000004530 | -0.049147558 | 7.471505693  | 0.038673552 | 0.844096804 | 0.999071534 | Coro1c        | Coro1c        | CORO1C   | 200.925436  | 194.1156054 | 187.7560945 | 154.7220976 | 201.5052923 | 285.154911  | 173.5017018 | 120.2725496 | 124.374181  | 162.7438216 |
| ENSMUSG000000013646 | -0.060669982 | 4.598300145  | 0.038613462 | 0.844216419 | 0.999071534 | Sh3bp5l       | Sh3bp5l       | SH3BP5L  | 41.54657986 | 26.73981003 | 16.76273487 | 17.41490874 | 26.2264272  | 41.91100504 | 28.28058325 | 14.507315   | 12.49241616 | 21.69917622 |
| ENSMUSG000000081723 | 0.25099507   | -0.10326817  | 0.038568158 | 0.844306665 | 0.999071534 | Gm15931       | Gm15931       |          | 1.473780704 | 1.897281421 | 0           | 0           | 0.39241537  | 2.037340523 | 2.070889391 | 0           | 0           | 0.392153787 |
| ENSMUSG000000040681 | 0.066777732  | 7.863529579  | 0.038506443 | 0.844429689 | 0.999071534 | Hmgn1         | Hmgn1         | HMGN1    | 336.5132608 | 269.2360917 | 195.3632794 | 193.8536057 | 189.5366235 | 359.008505  | 430.5508475 | 139.0629767 | 119.8957677 | 144.1818757 |
| ENSMUSG000000025037 | 0.041395089  | 6.029325342  | 0.038506142 | 0.844430289 | 0.999071534 | Maoa          | Maoa          | MAOA     | 71.16255401 | 53.77607028 | 77.35093317 | 69.59025287 | 61.02058997 | 79.74732903 | 71.83397576 | 54.16064268 | 48.00544826 | 68.88834859 |
| ENSMUSG000000034292 | 0.065715489  | 3.28106511   | 0.03848181  | 0.844478821 | 0.999071534 | Traf3ip1      | Traf3ip1      | TRAF3IP1 | 8.211063924 | 9.486407105 | 8.078426441 | 8.742145425 | 14.25775843 | 17.17187012 | 7.183397576 | 9.049801264 | 7.071178959 | 8.300588492 |
| ENSMUSG000000038305 | 0.150959988  | 0.788242618  | 0.038476413 | 0.844489589 | 0.999071534 | Spats2l       | Spats2l       | SPATS2L  | 2.526481208 | 1.719411288 | 1.615685288 | 1.040731598 | 0.915635862 | 3.638108076 | 4.012348196 | 0.207247357 | 0.078568655 | 0.784307574 |
| ENSMUSG000000028622 | -0.048860905 | 5.319791392  | 0.038452711 | 0.844536883 | 0.999071534 | Mrp137        | Mrp137        | MRPL37   | 56.56510703 | 35.5147366  | 43.21958146 | 37.32757332 | 37.93348573 | 58.35525354 | 49.44248422 | 21.13923043 | 28.59899046 | 35.88207151 |
| ENSMUSG000000031938 | -0.055946423 | 4.09576005   | 0.038412794 | 0.844616567 | 0.999071534 | 4931406C07Rik | 4931406C07Rik | C11orf54 | 14.03600671 | 19.20997439 | 13.80064517 | 23.17362359 | 19.09754799 | 15.28005392 | 13.46078104 | 22.03730231 | 13.1209654  | 15.81686941 |
| ENSMUSG000000074813 | -0.055219923 | 4.099374104  | 0.038406458 | 0.844629219 | 0.999071534 | Gm14005       | Gm14005       |          | 16.28176778 | 16.12689208 | 26.72612748 | 16.79046978 | 13.86534306 | 14.62519447 | 17.60255983 | 16.02712896 | 12.09957289 | 19.93448417 |
| ENSMUSG000000048924 | 0.116403352  | 1.068355792  | 0.038391636 | 0.844658822 | 0.999071534 | Ccdc125       | Ccdc125       | CCDC125  | 1.754500839 | 0.889350666 | 4.510454763 | 1.873316877 | 0.719428178 | 3.128772945 | 1.164875283 | 1.657978857 | 2.278490998 | 1.699333077 |
| ENSMUSG000000040105 | -0.079470233 | 2.640585717  | 0.038385644 | 0.844670791 | 0.999071534 | Ppapdc2       | Ppapdc2       | PLPP6    | 6.105662918 | 7.292675462 | 9.559471289 | 3.469105327 | 6.278645913 | 7.421740475 | 7.24811287  | 7.737234668 | 2.357059653 | 4.575127515 |
| ENSMUSG000000024841 | 0.048924345  | 5.125765766  | 0.038369509 | 0.844703023 | 0.999071534 | Eif1ad        | Eif1ad        | EIF1AD   | 40.14297919 | 30.83082309 | 42.88298036 | 27.75284262 | 36.42922681 | 54.78990763 | 47.56574071 | 22.93537419 | 23.57059653 | 26.79717545 |
| ENSMUSG000000043962 | 0.045494975  | 6.388293109  | 0.038365341 | 0.844711351 | 0.999071534 | Thrap3        | Thrap3        | THRAP3   | 72.77669478 | 98.48076376 | 90.14177504 | 69.79839919 | 97.18820653 | 131.553988  | 56.36702062 | 93.19222828 | 56.01945108 | 83.20196181 |
| ENSMUSG000000040263 | -0.056594282 | 3.962787242  | 0.038359597 | 0.844722829 | 0.999071534 | Klhdc4        | Klhdc4        | KLHDC4   | 17.12392818 | 12.92522968 | 17.70521795 | 16.16603083 | 17.92030188 | 24.81189708 | 12.23119047 | 9.602460883 | 10.29249382 | 18.43122799 |
| ENSMUSG000000003948 | 0.050221172  | 7.646024263  | 0.038351343 | 0.844739322 | 0.999071534 | Mmd           | Mmd           | MMD      | 200.3639958 | 201.4675709 | 189.5064203 | 186.2909561 | 245.3250085 | 186.7077065 | 264.3619739 | 225.5542071 | 131.9953406 | 176.5999221 |
| ENSMUSG000000044968 | -0.077597493 | 2.477332081  | 0.03834277  | 0.844756457 | 0.999071534 | Napepld       | Napepld       | NAPEPLD  | 4.772242281 | 6.877645151 | 5.250977187 | 3.260959008 | 9.0255535   | 6.330308052 | 3.624056435 | 5.872008453 | 3.928432755 | 5.94766577  |
| ENSMUSG000000031584 | 0.046969394  | 6.748668968  | 0.03833785  | 0.84476629  | 0.999071534 | Gsr           | Gsr           | GSR      | 102.6733891 | 83.89541284 | 138.3430528 | 105.8770946 | 117.2013904 | 119.6937557 | 95.260912   | 77.57959404 | 112.981726  | 116.6657516 |
| ENSMUSG000000024228 | -0.095932358 | 1.971227945  | 0.038307837 | 0.844826293 | 0.999071534 | Nudt12        | Nudt12        | NUDT12   | 3.859901845 | 3.142372354 | 4.847055865 | 3.469105327 | 5.035997243 | 6.330308052 | 4.530070544 | 2.003391119 | 4.085570065 | 0.980384468 |
| ENSMUSG000000091515 | -0.196171187 | -0.410489555 | 0.038276417 | 0.844889134 | 0.999071534 | Zfp422-rs1    | Zfp422-ps     |          | 0.912340436 | 0.830060622 | 0.201960661 | 0           | 1.504258917 | 0.727621615 | 1.100159989 | 0.759906976 | 0           | 0.261435858 |
| ENSMUSG000000059775 | -0.116999179 | 1.153044438  | 0.038173291 | 0.84509558  | 0.999071534 | Rps26-ps1     | Rps26-ps1     | RPS26    | 2.526481208 | 1.778701332 | 2.894769475 | 3.191576901 | 0.784830739 | 0.9459081   | 4.141778783 | 1.588896405 | 0.707117896 | 2.287563758 |
| ENSMUSG000000033717 | 0.144811405  | 1.061928106  | 0.038131415 | 0.845179493 | 0.999071534 | Adra2a        | Adra2a        | ADRA2A   | 1.965040939 | 2.54947191  | 3.635291898 | 0.277528426 | 1.24264867  | 5.893735083 | 2.78275762  | 0.138164905 | 1.021392516 | 0.915025503 |
| ENSMUSG000000032477 | 0.057093278  | 4.08915659   | 0.038090033 | 0.845262462 | 0.999071534 | Cdc25a        | Cdc25a        | CDC25A   | 18.17662869 | 10.07930755 | 24.43723998 | 13.8070392  | 19.62076848 | 26.12161599 | 16.63183042 | 12.22759407 | 12.17814154 | 17.97371524 |
| ENSMUSG000000028618 | -0.050397047 | 7.883646259  | 0.037980291 | 0.84548272  | 0.999071534 | Tmem59        | Tmem59        | TMEM59   | 236.6470731 | 270.0068622 | 209.0966044 | 260.8073385 | 269.3931512 | 198.5679388 | 272.1278091 | 261.2007525 | 165.5441563 | 217.5799928 |
| ENSMUSG000000035171 | 0.055666995  | 4.968025221  | 0.037966791 | 0.845509838 | 0.999071534 | 1110059E24Rik | 1110059E24Rik | C9orf85  | 42.45892029 | 25.61329918 | 30.29409915 | 30.18121635 | 30.34678858 | 28.68829164 | 55.65515239 | 24.45518815 | 14.84947581 | 31.82981571 |
| ENSMUSG000000039405 | -0.048007435 | 6.392520176  | 0.037950971 | 0.845541622 | 0.999071534 | Prss23        | Prss23        | PRSS23   | 50.81034428 | 88.28287612 | 96.53719597 | 114.6886221 | 89.27449658 | 99.61139912 | 75.4580322  | 62.72686677 | 74.95449696 | 86.07775625 |

|                    |              |              |             |             |             |              |              |          |             |             |             |             |             |             |             |             |             |             |
|--------------------|--------------|--------------|-------------|-------------|-------------|--------------|--------------|----------|-------------|-------------|-------------|-------------|-------------|-------------|-------------|-------------|-------------|-------------|
| ENSMUSG00000056579 | 0.047668874  | 6.467792885  | 0.037944874 | 0.845553875 | 0.999071534 | Tug1         | Tug1         |          | 71.86435435 | 99.48869452 | 95.05615112 | 80.62200781 | 104.6440986 | 86.07763708 | 56.36702062 | 118.4073234 | 77.31155662 | 91.17575548 |
| ENSMUSG00000030790 | 0.133505881  | 6.947635304  | 0.037929177 | 0.845585422 | 0.999071534 | Adm          | Adm          | ADM      | 45.68720184 | 253.9392602 | 97.21039817 | 84.16049524 | 132.1131744 | 5.020589145 | 35.14040436 | 408.5536235 | 50.36250792 | 101.6985488 |
| ENSMUSG00000028691 | -0.056432127 | 9.882494847  | 0.037917579 | 0.845608735 | 0.999071534 | Prdx1        | Prdx1        | PRDX1    | 1279.803092 | 930.3200868 | 821.5086488 | 1041.286655 | 921.1950801 | 914.3293217 | 1513.625999 | 693.3805747 | 601.2859175 | 780.3860362 |
| ENSMUSG00000034023 | 0.086683337  | 2.463800566  | 0.037900662 | 0.845642747 | 0.999071534 | Fancd2       | Fancd2       | FANCD2   | 7.088183388 | 3.616692709 | 6.866662475 | 4.371072713 | 5.232204928 | 11.27813504 | 7.377543457 | 2.003391119 | 3.457020824 | 3.986896835 |
| ENSMUSG00000048779 | -0.084345018 | 4.075546236  | 0.03789431  | 0.845655521 | 0.999071534 | P2ry6        | P2ry6        | P2RY6    | 24.42265167 | 22.17447661 | 11.04051614 | 11.93372233 | 20.47100178 | 42.12929152 | 21.8737692  | 6.839162787 | 4.00700141  | 70.11887018 |
| ENSMUSG00000037112 | 0.071518287  | 3.371740027  | 0.037809936 | 0.845825287 | 0.999071534 | Slk2         | Slk2         | SLK2     | 12.84294614 | 14.94109119 | 6.597381593 | 7.493267507 | 10.13739705 | 16.66253499 | 7.183397576 | 15.19813953 | 6.364061063 | 6.470537486 |
| ENSMUSG00000026566 | 0.069233392  | 4.751659325  | 0.037809747 | 0.845825668 | 0.999071534 | Mpzd1        | Mpzd1        | MPZL1    | 26.45787265 | 33.61745518 | 18.64770103 | 28.03037105 | 29.10413991 | 46.13121041 | 50.54264421 | 17.61602536 | 7.778296855 | 17.64692042 |
| ENSMUSG00000000730 | 0.119389375  | 0.925240749  | 0.037747993 | 0.845950047 | 0.999071534 | Dnmt3l       | Dnmt3l       | DNMT3L   | 1.754500839 | 2.668051998 | 0.336601102 | 2.636520049 | 1.308051232 | 1.819054038 | 3.041618794 | 1.4507315   | 0.628549241 | 2.091486864 |
| ENSMUSG00000021023 | -0.072205814 | 2.893397213  | 0.037678013 | 0.846091122 | 0.999071534 | 111008L16Rik | 111008L16Rik | KIAA0391 | 8.421604025 | 8.893506661 | 7.674505119 | 4.856747458 | 9.221761185 | 10.69603774 | 8.995425794 | 7.668152216 | 3.353589479 | 4.509768551 |
| ENSMUSG00000055704 | -0.126444179 | 1.027005627  | 0.037637923 | 0.846172001 | 0.999071534 | Gm9978       | Gm9978       |          | 0.912340436 | 1.422961066 | 2.625488593 | 3.122194795 | 2.158284533 | 0.727621615 | 0.323576467 | 1.657978857 | 2.357059653 | 3.33330719  |
| ENSMUSG00000074743 | -0.070516409 | 4.359545634  | 0.037574661 | 0.846299721 | 0.999071534 | Thbd         | Thbd         | THBD     | 20.70310989 | 41.85877135 | 12.11763966 | 13.87642131 | 20.6018069  | 23.72046466 | 26.20969386 | 27.77114586 | 10.6853709  | 9.215613995 |
| ENSMUSG00000035049 | 0.078013028  | 3.969292411  | 0.037566977 | 0.846315242 | 0.999071534 | Rrp12        | Rrp12        | RRP12    | 23.29977714 | 13.93316044 | 14.20456649 | 14.15394974 | 13.01510976 | 42.71138881 | 16.8259763  | 5.457513739 | 7.935434165 | 10.39207536 |
| ENSMUSG00000029915 | 0.06269015   | 4.604029826  | 0.037515656 | 0.846418947 | 0.999071534 | Clec5a       | Clec5a       | CLECSA   | 34.38821644 | 20.1586151  | 27.06272858 | 21.43907092 | 20.01318385 | 47.22264283 | 33.65195261 | 10.98410993 | 12.49241616 | 21.1763045  |
| ENSMUSG00000002015 | -0.052941551 | 8.351227402  | 0.037401938 | 0.846648999 | 0.999071534 | Bcap31       | Bcap31       | BCAP31   | 340.5837028 | 295.027261  | 322.8004565 | 387.2909188 | 376.3263394 | 258.2329112 | 447.3121085 | 321.0952387 | 213.6281732 | 303.2655953 |
| ENSMUSG00000008623 | -0.261132282 | -0.66468553  | 0.037381202 | 0.846690988 | 0.999071534 | Gm11816      | Gm11816      |          | 0.701800335 | 1.660121243 | 0.336601102 |             | 0           | 0.065402562 | 1.091432423 | 1.229590576 | 0           | 0           |
| ENSMUSG00000022664 | 0.068000325  | 3.422781335  | 0.03734007  | 0.846774312 | 0.999071534 | Slc35a5      | Slc35a5      | SLC35A5  | 8.140883891 | 13.04380977 | 6.933982695 | 13.32136446 | 12.03407133 | 8.294886414 | 12.68419752 | 10.98410993 | 11.86386692 | 7.189486096 |
| ENSMUSG00000000296 | 0.152504071  | 0.338355486  | 0.037334157 | 0.846786294 | 0.999071534 | Tpd52l1      | Tpd52l1      | TPD52L1  | 0.912340436 | 1.600831199 | 1.481044848 | 0.20814632  | 1.373453794 | 1.018670261 | 1.423736457 | 2.348803381 | 0           | 1.045743432 |
| ENSMUSG00000046997 | 0.183323556  | -0.121186386 | 0.037320323 | 0.846814332 | 0.999071534 | Spsb4        | Spsb4        | SPSB4    | 0.771980369 | 0.296450222 | 0.740522424 | 0.971349492 | 0.981038424 | 2.182864846 | 1.229590576 | 0           | 0           | 0.980384468 |
| ENSMUSG00000032115 | -0.069329074 | 6.540551675  | 0.037288261 | 0.846879333 | 0.999071534 | Hyou1        | Hyou1        | HYOU1    | 125.8328001 | 140.6952754 | 64.89669241 | 61.4725464  | 105.2327216 | 193.1107767 | 130.8543234 | 64.45392808 | 27.89187256 | 52.35253057 |
| ENSMUSG00000025034 | -0.048799391 | 6.113432195  | 0.037263968 | 0.846928602 | 0.999071534 | Trim8        | Trim8        | TRIM8    | 67.7939124  | 57.2741829  | 84.41955631 | 64.80288752 | 90.97496318 | 86.15039924 | 37.59958551 | 63.14136149 | 76.13302679 | 62.02565732 |
| ENSMUSG00000023004 | 0.056938394  | 10.51908247  | 0.0371998   | 0.847058825 | 0.999071534 | Tuba1b       | Tuba1b       | TUBA1B   | 1844.752362 | 1058.564453 | 1636.487236 | 1524.186117 | 1396.08308  | 2126.47417  | 2134.56924  | 862.2871708 | 1084.090303 | 1173.585567 |
| ENSMUSG00000046031 | -0.10289421  | 1.64804324   | 0.037188392 | 0.847081989 | 0.999071534 | Fam26f       | Fam26f       | FAM26F   | 6.877643287 | 2.608761954 | 1.548365068 | 1.80393477  | 3.466335765 | 5.166113468 | 1.359021163 | 2.763298096 | 1.492804447 | 3.725460977 |
| ENSMUSG00000027997 | 0.049499772  | 5.539904781  | 0.037089612 | 0.847282712 | 0.999071534 | Casp6        | Casp6        | CASP6    | 33.2653359  | 41.56232113 | 67.1855799  | 44.12701977 | 50.16376474 | 33.68888078 | 42.90623958 | 53.81523041 | 47.69117364 | 43.92122415 |
| ENSMUSG00000030402 | -0.040244362 | 5.345214064  | 0.037082084 | 0.847298022 | 0.999071534 | Gbbp1l1      | Gbbp1l1      | GPBP1L1  | 49.26638355 | 44.17108308 | 42.95030058 | 33.58093957 | 44.01592395 | 40.67404829 | 35.91698788 | 45.38717122 | 31.74173666 | 38.69250699 |
| ENSMUSG00000031229 | 0.054526932  | 7.245184859  | 0.036968125 | 0.84752996  | 0.999071534 | Atrx         | Atrx         | ATRX     | 99.44510753 | 143.7783577 | 178.6678648 | 171.235039  | 176.2599035 | 169.7541228 | 81.92956154 | 171.6698942 | 153.5231521 | 160.9791296 |
| ENSMUSG00000053477 | 0.068239938  | 7.333887461  | 0.036948925 | 0.847569072 | 0.999071534 | Tcf4         | Tcf4         | TCF4     | 87.23378169 | 104.8840886 | 244.4397201 | 207.8687912 | 165.9917013 | 135.6286691 | 75.58746278 | 186.9371162 | 194.3788527 | 179.2796396 |
| ENSMUSG00000052155 | -0.065760897 | 3.326989939  | 0.036944629 | 0.847577826 | 0.999071534 | Acvr2a       | Acvr2a       | ACVR2A   | 11.5095255  | 7.766995817 | 13.06012275 | 8.603381212 | 11.77246109 | 15.20729176 | 12.61948223 | 9.53337843  | 4.871256616 | 6.078383699 |
| ENSMUSG00000030168 | 0.058380788  | 6.510986036  | 0.036937237 | 0.847592888 | 0.999071534 | Adipor2      | Adipor2      | ADIPO2   | 93.76052481 | 143.7190676 | 50.2882046  | 53.9792789  | 125.8345285 | 104.1954153 | 114.3519236 | 116.818427  | 45.80552592 | 74.96673229 |
| ENSMUSG00000092416 | 0.068440391  | 2.838277302  | 0.036927597 | 0.847612534 | 0.999071534 | Zfp141       | Zfp141       |          | 8.000523824 | 8.241316173 | 7.135943356 | 6.03624327  | 6.213243352 | 6.039259406 | 8.73656462  | 5.388431287 | 5.264099892 | 9.150255031 |
| ENSMUSG00000059669 | 0.054627683  | 3.945566001  | 0.036889049 | 0.847691118 | 0.999071534 | Taf1b        | Taf1b        | TAF1B    | 19.43986929 | 18.26133368 | 13.32940363 | 13.18260024 | 13.7999405  | 14.91624311 | 22.00319978 | 14.3691501  | 9.349669957 | 15.03256184 |
| ENSMUSG00000038022 | 0.071011251  | 3.081863403  | 0.036883192 | 0.847703062 | 0.999071534 | Fam188b      | Fam188b      | FAM188B  | 7.368903522 | 10.96865822 | 7.607184899 | 5.203657991 | 11.31464316 | 5.74821076  | 6.795105815 | 9.187966168 | 6.992610304 | 11.82997258 |
| ENSMUSG00000027678 | 0.048495163  | 4.556224496  | 0.036857824 | 0.847754804 | 0.999071534 | Ncoa3        | Ncoa3        | NCOA3    | 23.6506713  | 29.70431225 | 20.66730764 | 19.91266458 | 25.83401183 | 37.90908615 | 18.44385864 | 25.14601267 | 14.06378926 | 22.74491965 |
| ENSMUSG00000021012 | 0.047533923  | 6.903178972  | 0.036853375 | 0.847763881 | 0.999071534 | Zc3h14       | Zc3h14       | ZC3H14   | 86.46180132 | 126.880695  | 132.6208341 | 117.5332885 | 146.7633482 | 111.5443936 | 98.10838491 | 158.4751458 | 96.16803384 | 117.907572  |
| ENSMUSG00000092467 | -0.211140036 | -0.646154848 | 0.036851014 | 0.847768698 | 0.999071534 | Gm18360      | Gm18360      |          |             | 0           | 1.126510844 | 1.481044848 | 0           | 0.196207685 | 0.291048646 | 0.906014109 | 0.483577167 | 0.130717929 |
| ENSMUSG00000056870 | 0.05322478   | 4.884453654  | 0.03680947  | 0.847853482 | 0.999071534 | Gulp1        | Gulp1        | GULP1    | 26.73859278 | 33.26171491 | 24.36991976 | 27.05902155 | 38.78371903 | 24.08427546 | 43.55339251 | 37.92626636 | 14.61376985 | 25.09784237 |
| ENSMUSG00000074793 | 0.07452018   | 2.958990963  | 0.036781805 | 0.84790997  | 0.999071534 | Hspa12b      | Hspa12b      | HSPA12B  | 7.298723488 | 8.419186306 | 4.981696305 | 7.978942253 | 10.00659192 | 15.20729176 | 8.865595207 | 3.730452429 | 4.478413341 | 7.385562989 |
| ENSMUSG00000027896 | 0.127238722  | 0.847575322  | 0.036694165 | 0.848089063 | 0.999071534 | Slc16a4      | Slc16a4      | SLC16A4  | 1.403600671 | 0.592900444 | 2.558168373 | 2.081463196 | 1.569661478 | 0.727621615 | 2.912188207 | 2.832380548 | 0.235705965 | 1.699333077 |
| ENSMUSG00000080790 | 0.190125197  | -0.42469688  | 0.036669432 | 0.848139644 | 0.999071534 | Gm7638       | Gm7638       |          | 0.140360067 | 0.118580089 | 0.740522424 | 1.80393477  | 0.130805123 | 0.509335131 | 0.064715293 | 0.967154334 | 1.178529826 | 0.326794823 |
| ENSMUSG00000098142 | -0.186811543 | -0.078546667 | 0.036657377 | 0.848164305 | 0.999071534 | Gm7507       | Gm7507       |          | 0.140360067 | 1.897281421 | 0.807842644 | 0.20814632  | 1.438856355 | 0.363810808 | 0.258861174 | 2.417885834 | 0           | 0.588230681 |

|                     |              |             |             |             |             |               |               |          |             |             |              |             |             |             |             |             |             |             |
|---------------------|--------------|-------------|-------------|-------------|-------------|---------------|---------------|----------|-------------|-------------|--------------|-------------|-------------|-------------|-------------|-------------|-------------|-------------|
| ENSMUSG00000004936  | -0.045856585 | 6.067124501 | 0.036644656 | 0.848190333 | 0.999071534 | Map2k1        | Map2k1        | MAP2K1   | 60.35482885 | 99.01437416 | 65.03133285  | 55.22815681 | 74.36271253 | 66.43185347 | 59.86164647 | 90.15260037 | 49.34111554 | 51.43750507 |
| ENSMUSG000000040640 | 0.057223452  | 3.49866604  | 0.036639303 | 0.848201845 | 0.999071534 | Erc2          | Erc2          | ERC2     | 8.491784059 | 11.97658897 | 11.10783636  | 13.46012867 | 11.5762534  | 14.84348095 | 11.13103048 | 10.36236786 | 7.85686551  | 11.63389568 |
| ENSMUSG000000032413 | 0.04921797   | 4.386902154 | 0.036624762 | 0.848231044 | 0.999071534 | Rasa2         | Rasa2         | RASA2    | 18.31698875 | 26.91768016 | 25.04312197  | 19.63513615 | 16.02362759 | 27.57685922 | 18.18499747 | 24.59335305 | 16.34228026 | 16.33974113 |
| ENSMUSG000000002504 | -0.070911554 | 3.444264751 | 0.03657189  | 0.848339302 | 0.999071534 | Slc9a3r2      | Slc9a3r2      | SLC9A3R2 | 14.24654681 | 8.063446039 | 10.36731393  | 13.46012867 | 10.92222779 | 21.53759981 | 10.74273872 | 6.217420715 | 3.928432755 | 11.30710086 |
| ENSMUSG000000025008 | 0.07267839   | 3.292723491 | 0.036529817 | 0.848425506 | 0.999071534 | Tctn3         | Tctn3         | TCTN3    | 8.070703857 | 11.14652835 | 9.357510628  | 8.880909638 | 11.51085084 | 8.076599929 | 7.377543457 | 19.13583931 | 7.071178959 | 5.620870947 |
| ENSMUSG000000038121 | 0.04159938   | 5.433635853 | 0.036524775 | 0.848435842 | 0.999071534 | Fam210a       | Fam210a       | FAM210A  | 46.38900217 | 47.6691957  | 36.48755943  | 41.90679236 | 48.26709046 | 52.09770765 | 50.41321362 | 41.51855389 | 37.71295445 | 29.80368781 |
| ENSMUSG000000035198 | 0.045239107  | 5.474700622 | 0.036500424 | 0.848485762 | 0.999071534 | Tubg1         | Tubg1         | TUBG1    | 41.61675989 | 30.47508283 | 58.09735015  | 41.49049972 | 54.93815174 | 56.60896166 | 39.92933608 | 32.19242282 | 43.9198782  | 44.83624965 |
| ENSMUSG000000065990 | 0.044988507  | 6.059444761 | 0.036377594 | 0.84873783  | 0.999071534 | Aurkaip1      | Aurkaip1      | AURKAIP1 | 81.54919898 | 55.49548157 | 66.1757766   | 77.56919512 | 58.40448751 | 54.42609682 | 90.08368852 | 61.69062999 | 51.14819447 | 66.86222069 |
| ENSMUSG000000026960 | 0.045445175  | 5.05071385  | 0.036293965 | 0.848909704 | 0.999071534 | Arl6ip6       | Arl6ip6       | ARL6IP6  | 29.05453389 | 24.60536843 | 41.53657595  | 34.76043538 | 38.45670622 | 32.37916188 | 43.81225369 | 33.0904947  | 22.23492939 | 30.98014918 |
| ENSMUSG000000011267 | -0.12575358  | 0.242333339 | 0.036243376 | 0.849013773 | 0.999071534 | Zfp296        | Zfp296        | ZNF296   | 0.491260235 | 0.948640711 | 1.144443746  | 1.734552664 | 1.308051232 | 1.746291877 | 0.388291761 | 0.828989429 | 0.707117896 | 1.30717929  |
| ENSMUSG000000074825 | 0.078529975  | 3.975157164 | 0.036233272 | 0.849034567 | 0.999071534 | Itprilp1      | Itprilp1      | ITPRIPL1 | 28.70363372 | 14.34819075 | 9.290190407  | 13.8070392  | 12.9497072  | 37.18146454 | 18.96158099 | 5.457513739 | 6.756904338 | 14.57504908 |
| ENSMUSG000000003345 | -0.041956245 | 6.910279155 | 0.036226103 | 0.849049323 | 0.999071534 | Csnk1g2       | Csnk1g2       | CSNK1G2  | 143.9392488 | 119.8251797 | 120.8397955  | 108.4442325 | 141.5311433 | 166.9891607 | 97.59066257 | 106.9396363 | 89.01828623 | 120.4565716 |
| ENSMUSG000000001300 | 0.046741857  | 5.921471043 | 0.036218894 | 0.849064164 | 0.999071534 | Efnb2         | Efnb2         | EFNB2    | 40.91495955 | 52.70884948 | 75.86988833  | 62.99895275 | 75.80156889 | 71.30691829 | 41.48250312 | 78.20133611 | 53.03384219 | 52.09109471 |
| ENSMUSG000000021359 | 0.079085226  | 5.571128552 | 0.036214491 | 0.849073228 | 0.999071534 | Tfap2a        | Tfap2a        | TFAP2A   | 22.03653053 | 47.1355853  | 58.70323214  | 49.05314933 | 61.93622583 | 27.14028625 | 13.00777399 | 99.34056654 | 46.04123189 | 41.17614764 |
| ENSMUSG000000024570 | -0.049180179 | 4.186305267 | 0.03619682  | 0.849109614 | 0.999071534 | Rbfa          | Rbfa          | RBFA     | 24.84373187 | 16.24547217 | 18.17645949  | 15.61097397 | 20.92881971 | 23.21112953 | 19.67344922 | 13.12566595 | 11.70672961 | 19.60768935 |
| ENSMUSG000000028583 | -0.055228259 | 4.621301759 | 0.036193583 | 0.849116279 | 0.999071534 | Pdpn          | Pdpn          | PDPN     | 31.65119513 | 28.75567154 | 21.27318963  | 28.03037105 | 19.62076848 | 24.15703763 | 39.28218314 | 25.07693022 | 11.94243557 | 17.05868974 |
| ENSMUSG000000095865 | -0.078503139 | 5.795663645 | 0.036091993 | 0.849325642 | 0.999071534 | Gm13237       | Gm13237       |          | 64.00419059 | 46.24623464 | 68.39734387  | 53.90989679 | 63.1788745  | 80.98428577 | 110.469006  | 41.03497672 | 6.364061063 | 36.01278944 |
| ENSMUSG000000027131 | 0.045738097  | 5.971270982 | 0.036047713 | 0.849416995 | 0.999071534 | Emc4          | Emc4          | EMC4     | 65.8990515  | 54.13181054 | 58.9051928   | 65.56609069 | 75.34375096 | 45.25806447 | 90.53669558 | 58.23650737 | 50.0482333  | 59.41129873 |
| ENSMUSG000000036748 | -0.04137335  | 5.973575936 | 0.036025195 | 0.849463472 | 0.999071534 | Cuedc2        | Cuedc2        | CUEDC2   | 71.51345418 | 48.08422601 | 74.32152326  | 69.9371634  | 65.7295744  | 56.97277247 | 60.05579235 | 65.97374204 | 50.0482333  | 63.39819557 |
| ENSMUSG000000030742 | -0.108697605 | 1.014089041 | 0.035911054 | 0.849699293 | 0.999071534 | Lat           | Lat           | LAT      | 4.000261912 | 1.837991377 | 0.875162864  | 2.636520049 | 0.784830739 | 2.037340523 | 2.006174098 | 1.519813953 | 1.021392516 | 2.287563758 |
| ENSMUSG000000066362 | 0.185982374  | 0.946407785 | 0.035867764 | 0.849788834 | 0.999071534 | Rps13-ps1     | Rps13-ps1     |          | 3.789721811 | 2.253021687 | 1.009803305  | 1.734552664 | 0           | 0.218286485 | 1.553167044 | 0           | 3.299883514 | 3.529384083 |
| ENSMUSG000000009535 | -0.047708677 | 5.369185304 | 0.035866453 | 0.849791546 | 0.999071534 | Rnmt          | Rnmt          | RNMT     | 54.10880586 | 42.4516718  | 35.343311568 | 49.88573461 | 35.12117558 | 52.97085359 | 57.33775002 | 23.76436362 | 30.40606952 | 34.18273844 |
| ENSMUSG000000070287 | -0.120143106 | 0.335951684 | 0.035844521 | 0.849836932 | 0.999071534 | Slc35g2       | Slc35g2       | SLC35G2  | 0.912340436 | 1.304380977 | 1.279084186  | 0.485674746 | 2.158284533 | 0.873145938 | 1.747312924 | 0.759906976 | 0.707117896 | 1.111102397 |
| ENSMUSG000000021681 | -0.045556615 | 5.107456552 | 0.035844107 | 0.849837789 | 0.999071534 | Aggf1         | Aggf1         | AGGF1    | 36.35325737 | 40.19865011 | 30.56338004  | 34.41352485 | 39.83016001 | 59.01011299 | 30.02789617 | 24.04069343 | 19.32788915 | 37.25460977 |
| ENSMUSG000000023505 | 0.060487062  | 5.594925945 | 0.035841556 | 0.849843069 | 0.999071534 | Cdca3         | Cdca3         | CDCA3    | 55.2316864  | 16.54192239 | 67.38754056  | 53.07731151 | 52.06043903 | 56.02686437 | 50.54264421 | 25.90591965 | 55.94088243 | 46.53558273 |
| ENSMUSG000000056832 | 0.066632202  | 2.864331262 | 0.03580542  | 0.849917884 | 0.999071534 | Ttc26         | Ttc26         | TTC26    | 6.947823321 | 9.249246928 | 5.85685917   | 5.342422204 | 9.0255535   | 7.130691829 | 8.801279913 | 6.770080335 | 4.792687961 | 7.97379367  |
| ENSMUSG000000006763 | 0.055579344  | 4.121994791 | 0.035749368 | 0.850034009 | 0.999071534 | Saal1         | Saal1         | SAAL1    | 17.68536845 | 20.63293545 | 17.77253817  | 14.43147816 | 17.65869163 | 26.8492376  | 24.65652682 | 12.57300634 | 13.43524002 | 9.411690889 |
| ENSMUSG000000019820 | 0.058521786  | 6.250392117 | 0.035728155 | 0.850077983 | 0.999071534 | Utrn          | Utrn          | UTRN     | 43.3010807  | 102.868227  | 81.32282617  | 70.90851289 | 88.09725047 | 57.55486976 | 41.41778783 | 118.959983  | 77.39012527 | 68.75763066 |
| ENSMUSG000000051154 | 0.05636701   | 6.326042126 | 0.035720837 | 0.850093156 | 0.999071534 | Commdd3       | Commdd3       | COMMDD3  | 130.8155825 | 87.51210554 | 50.89408658  | 70.90851289 | 69.19591017 | 81.63914523 | 144.0562433 | 59.82540377 | 44.70556475 | 69.54193823 |
| ENSMUSG000000052921 | -0.059280409 | 3.444385754 | 0.03571792  | 0.850099204 | 0.999071534 | Arhgef15      | Arhgef15      | ARHGEF15 | 12.3516859  | 10.61291795 | 11.51157568  | 9.921641237 | 12.68809695 | 14.98900527 | 10.03087049 | 5.733843549 | 8.878258026 | 11.9606905  |
| ENSMUSG000000038637 | -0.114213369 | 0.570152204 | 0.035691903 | 0.85015316  | 0.999071534 | Lrrc56        | Lrrc56        | LRRC56   | 1.824680872 | 1.837991377 | 1.211763966  | 0.624438959 | 1.831271725 | 1.673529715 | 1.48845175  | 0.690824524 | 0.471411931 | 2.091486864 |
| ENSMUSG000000062908 | 0.04294941   | 6.522518473 | 0.035658446 | 0.850222577 | 0.999071534 | Acadm         | Acadm         | ACADM    | 99.16438739 | 82.29458164 | 91.69014011  | 99.07764815 | 96.66498604 | 72.25282639 | 92.86644614 | 85.73132342 | 82.88993113 | 109.2148297 |
| ENSMUSG000000021290 | 0.060397325  | 7.419741161 | 0.035630832 | 0.850279898 | 0.999071534 | 2010107E04Rik | 2010107E04Rik | C14orf2  | 218.4704444 | 107.0778202 | 154.0286641  | 256.1587374 | 126.4231516 | 122.1676692 | 201.329278  | 118.6145708 | 182.9863977 | 197.5147907 |
| ENSMUSG000000060935 | 0.047551922  | 7.017342862 | 0.035559432 | 0.850428211 | 0.999071534 | Al597468      | Tmem263       | TMEM263  | 100.357448  | 121.7817512 | 148.7103667  | 148.477708  | 139.045846  | 122.094907  | 102.2501637 | 137.7504101 | 138.9879509 | 121.6983919 |
| ENSMUSG000000041429 | 0.068477345  | 3.624889891 | 0.035522598 | 0.850504784 | 0.999071534 | Nthl1         | Nthl1         | NTHL1    | 14.87816711 | 6.99622524  | 10.83855548  | 17.48429085 | 11.24924059 | 11.20537287 | 7.312828163 | 8.566224097 | 13.74951464 | 18.30051006 |
| ENSMUSG000000015357 | 0.045164551  | 4.555681424 | 0.035505244 | 0.850540875 | 0.999071534 | Clpx          | Clpx          | CLPX     | 24.63319177 | 31.12727331 | 22.14835249  | 18.52502245 | 23.47951961 | 32.5246862  | 24.07408917 | 19.68849893 | 16.02800564 | 24.57497065 |
| ENSMUSG000000042446 | -0.041753191 | 4.904302969 | 0.035469862 | 0.850614487 | 0.999071534 | Zmym4         | Zmym4         | ZMYM4    | 26.87895285 | 38.24207864 | 31.03462158  | 28.37728158 | 32.57047567 | 37.98184831 | 22.58563742 | 27.4257336  | 24.6705577  | 30.1958416  |
| ENSMUSG000000028053 | 0.04597999   | 5.379816292 | 0.035416836 | 0.850724878 | 0.999071534 | Ash1l         | Ash1l         | ASH1L    | 31.65119513 | 54.48755081 | 41.67121639  | 37.32757332 | 47.08984435 | 55.08095627 | 26.59789562 | 46.63065537 | 41.6413872  | 33.3330719  |
| ENSMUSG000000031097 | -0.123567831 | 3.494778609 | 0.035404265 | 0.850751063 | 0.999071534 | Tnni2         | Tnni2         | TNNI2    | 32.70389563 | 1.48225111  | 14.94508892  | 8.04832436  | 3.597140888 | 2.910486461 | 4.012348196 | 8.842553906 | 20.27071302 | 11.045665   |

|                     |              |              |             |             |             |               |               |              |             |             |             |             |             |             |             |             |             |             |
|---------------------|--------------|--------------|-------------|-------------|-------------|---------------|---------------|--------------|-------------|-------------|-------------|-------------|-------------|-------------|-------------|-------------|-------------|-------------|
| ENSMUSG00000024878  | -0.066925064 | 3.388023134  | 0.035324818 | 0.850916648 | 0.999071534 | Cbwd1         | Cbwd1         | CBWD1        | 12.562226   | 14.11103057 | 6.260780492 | 10.68484441 | 11.38004572 | 11.20537287 | 15.40223985 | 10.08603805 | 4.085570065 | 9.019537102 |
| ENSMUSG00000054855  | 0.116550469  | 1.466864512  | 0.035285171 | 0.850999355 | 0.999071534 | Rnd1          | Rnd1          | RND1         | 4.772242281 | 2.371601776 | 1.346404407 | 1.80393477  | 2.87771271  | 5.529924276 | 4.46535525  | 1.519813953 | 0.15713731  | 2.483640651 |
| ENSMUSG00000038085  | -0.100402912 | 1.47621386   | 0.035283031 | 0.85100382  | 0.999071534 | Cnbd2         | Cnbd2         | CNBD2        | 1.965040939 | 3.972432975 | 4.106533441 | 1.734552664 | 2.485297341 | 1.45524323  | 1.29430587  | 4.421276953 | 2.828471584 | 1.895409971 |
| ENSMUSG00000025204  | 0.058118515  | 7.077838531  | 0.035268563 | 0.851034013 | 0.999071534 | Ndufb8        | Ndufb8        | RP11-41186.6 | 202.6097568 | 95.69413167 | 130.0626657 | 153.1263092 | 103.6630601 | 123.8411989 | 242.6176353 | 89.73810566 | 101.1178591 | 108.0383683 |
| ENSMUSG00000029859  | 0.062895015  | 3.506178636  | 0.035203417 | 0.851170049 | 0.999071534 | Epha1         | Epha1         | EPHA1        | 10.59718506 | 9.486407105 | 12.5888812  | 12.28063286 | 11.96866877 | 11.56918368 | 11.84289871 | 13.67832557 | 4.242707375 | 15.03256184 |
| ENSMUSG00000074384  | 0.076333483  | 2.940801314  | 0.035195076 | 0.851187477 | 0.999071534 | Al429214      | Al429214      | C8orf48      | 4.912602348 | 9.604987194 | 7.405224238 | 6.521918016 | 9.744981678 | 3.565345915 | 6.277383467 | 10.22402095 | 5.656943167 | 10.84958811 |
| ENSMUSG00000024132  | 0.045005564  | 5.155233744  | 0.035190196 | 0.851197673 | 0.999071534 | Ec1l          | Ec1l          | EC1          | 31.15993489 | 25.43542905 | 35.67971678 | 38.02139439 | 51.07940061 | 34.92583753 | 43.10038546 | 31.6397632  | 31.03461876 | 32.41804639 |
| ENSMUSG00000032512  | 0.041999752  | 4.924167835  | 0.035179631 | 0.851219751 | 0.999071534 | Wdr48         | Wdr48         | WDR48        | 26.45787265 | 36.048347   | 29.28429585 | 27.33654998 | 35.77520119 | 42.05652936 | 24.39766564 | 34.12673148 | 21.99922343 | 27.71220095 |
| ENSMUSG00000039452  | -0.114147328 | 0.361063591  | 0.035102303 | 0.851381452 | 0.999071534 | Snx22         | Snx22         | SNX22        | 1.684320805 | 1.304380977 | 1.481044848 | 0.971349492 | 0.784830739 | 0.582097292 | 0.970729402 | 1.4507315   | 1.021392516 | 1.176461361 |
| ENSMUSG00000039470  | -0.05840213  | 4.57461759   | 0.035090045 | 0.851407102 | 0.999071534 | Zdhc2         | Zdhc2         | ZDHC2        | 33.0547958  | 21.58157616 | 20.59998742 | 22.47980252 | 28.18850405 | 31.5787781  | 41.09421136 | 12.29667653 | 14.53520119 | 15.35935666 |
| ENSMUSG00000007888  | 0.127915475  | 1.516796933  | 0.035060917 | 0.851468068 | 0.999071534 | Crlf1         | Crlf1         | CRLF1        | 4.491522147 | 1.600831199 | 2.423527932 | 3.538487434 | 1.373453794 | 8.294886414 | 5.047792891 | 0.621742072 | 0.549980586 | 0.653589645 |
| ENSMUSG00000043822  | -0.067820699 | 4.013598724  | 0.03502531  | 0.851542633 | 0.999071534 | Adamts5       | Adamts5       | ADAMTSL5     | 12.98330621 | 24.66465847 | 17.70521795 | 14.08456763 | 15.76201734 | 10.04117829 | 9.448432848 | 25.9750021  | 7.542590889 | 22.09133    |
| ENSMUSG00000023723  | -0.054669968 | 5.608563768  | 0.035001132 | 0.851593288 | 0.999071534 | Mrp23         | Mrp23         | MRPS23       | 72.98723488 | 52.59026939 | 42.41173882 | 41.00482497 | 49.57514169 | 58.35525354 | 85.3594721  | 28.66921774 | 20.66355629 | 44.18266001 |
| ENSMUSG00000026626  | 0.041566806  | 5.72623086   | 0.034977537 | 0.851642737 | 0.999071534 | Ppp2r5a       | Ppp2r5a       | PPP2R5A      | 49.12602348 | 66.34555969 | 48.87447997 | 42.18432078 | 64.74853598 | 78.65589661 | 46.27143484 | 55.81862153 | 29.69895163 | 55.35904294 |
| ENSMUSG00000059878  | 0.05032103   | 4.581651725  | 0.03496642  | 0.851666043 | 0.999071534 | Zfp422        | Zfp422        | ZNF22        | 15.72032751 | 20.98867572 | 34.06403149 | 23.58991623 | 26.88045282 | 39.00051858 | 22.90921389 | 22.03730231 | 15.3994564  | 21.11094554 |
| ENSMUSG00000030421  | -0.04171298  | 5.031839655  | 0.0349491   | 0.851702358 | 0.999071534 | Uri1          | Uri1          | URI1         | 34.66893657 | 30.83082309 | 39.65160978 | 29.34863107 | 37.41026523 | 47.6592158  | 36.95243258 | 26.87307398 | 21.5278115  | 25.75143201 |
| ENSMUSG00000022992  | 0.040545632  | 6.947922581  | 0.034889948 | 0.851826455 | 0.999071534 | Kansl2        | Kansl2        | KANSL2       | 121.0605579 | 116.7420974 | 126.6966547 | 129.1201003 | 137.1491717 | 143.9325555 | 110.9867283 | 127.3189598 | 93.9681115  | 130.9793649 |
| ENSMUSG00000005667  | -0.060120859 | 4.948934793  | 0.034874688 | 0.851858487 | 0.999071534 | Mthfd2        | Mthfd2        | MTHFD2       | 36.42343741 | 24.9611087  | 39.98821088 | 30.66689109 | 30.93541163 | 63.1575562  | 42.12965606 | 13.88557293 | 16.02800564 | 18.62730488 |
| ENSMUSG00000001440  | -0.049011866 | 8.722308476  | 0.034859858 | 0.851889623 | 0.999071534 | Kpnb1         | Kpnb1         | KPNB1        | 429.2912652 | 440.0507096 | 503.824529  | 351.004077  | 511.7096419 | 684.3281291 | 347.0034036 | 385.4110019 | 306.7320295 | 332.8078473 |
| ENSMUSG00000025407  | 0.102237171  | 1.351000176  | 0.034776738 | 0.852064266 | 0.999071534 | Gli1          | Gli1          | GLI1         | 1.894860906 | 2.490181865 | 2.221567271 | 1.873316877 | 3.662543449 | 2.328389169 | 1.941458804 | 5.595678644 | 0.864255206 | 1.437897219 |
| ENSMUSG00000037251  | -0.054512388 | 3.642963264  | 0.034752424 | 0.852115393 | 0.999071534 | Pomk          | Pomk          | POMK         | 12.91312617 | 17.07553279 | 9.82875217  | 14.01518552 | 11.44544828 | 16.0804377  | 13.65492692 | 11.32952219 | 8.406846095 | 9.999921569 |
| ENSMUSG00000039202  | -0.055977727 | 7.829090556  | 0.034740393 | 0.852140699 | 0.999071534 | Abhd2         | Abhd2         | ABHD2        | 203.1010171 | 215.6971816 | 264.9727833 | 326.3040471 | 182.6693545 | 248.8465924 | 138.4260128 | 164.8998139 | 265.3263483 | 239.8673997 |
| ENSMUSG000000082361 | 0.085023989  | 2.241501299  | 0.034737007 | 0.852147822 | 0.999071534 | Btc           | Btc           | BTC          | 7.088183388 | 6.640484974 | 2.962089695 | 2.89609516  | 4.381971627 | 6.330308052 | 6.989251696 | 5.112101477 | 2.514196963 | 2.418281687 |
| ENSMUSG00000024039  | 0.142720787  | -0.031253365 | 0.034720895 | 0.852181719 | 0.999071534 | Cbs           | Cbs           | CBSL         | 0.421080201 | 0.770770577 | 1.279084186 | 0.624438959 | 1.046440986 | 1.746291877 | 0.323576467 | 1.312566595 | 0.078568655 | 1.045743432 |
| ENSMUSG00000056851  | 0.051392437  | 8.643022918  | 0.034669946 | 0.852288965 | 0.999071534 | Pcbp2         | Pcbp2         | PCBP2        | 291.3173192 | 503.1946069 | 422.5017029 | 353.7793613 | 469.7211974 | 379.4546723 | 322.6704533 | 521.641598  | 352.85183   | 365.4219705 |
| ENSMUSG00000026925  | -0.059965229 | 3.481682221  | 0.034551076 | 0.852539496 | 0.999071534 | Inpp5e        | Inpp5e        | INPP5E       | 9.404124495 | 12.27303919 | 9.694111729 | 11.23990126 | 15.95822503 | 12.22404314 | 7.765835218 | 13.54016067 | 6.285492408 | 12.94107497 |
| ENSMUSG00000062580  | 0.044610135  | 6.807174762  | 0.034549663 | 0.852542476 | 0.999071534 | Timm17a       | Timm17a       | TIMM17A      | 126.8855006 | 108.085751  | 105.3561448 | 114.61924   | 116.808975  | 133.4458042 | 167.2243184 | 87.11297247 | 66.23337625 | 104.3129073 |
| ENSMUSG00000053581  | 0.066608548  | 4.739028261  | 0.034531244 | 0.852581337 | 0.999071534 | Zfand2a       | Zfand2a       | ZFAND2A      | 28.14219345 | 57.68921321 | 18.04181905 | 12.41939707 | 19.62076848 | 28.52276732 | 36.88771728 | 32.39967017 | 12.17814154 | 23.46386826 |
| ENSMUSG00000090551  | -0.20843364  | -0.822313895 | 0.034492418 | 0.852663289 | 0.999071534 | A730015C16Rik | A730015C16Rik |              | 0.140360067 | 0.355740266 | 1.817645949 | 0           | 0.065402562 | 0.363810808 | 0.323576467 | 0.138164905 | 0.078568655 | 1.045743432 |
| ENSMUSG00000029166  | -0.061876929 | 4.115278971  | 0.034441685 | 0.852770445 | 0.999071534 | Mapre3        | Mapre3        | MAPRE3       | 11.79024564 | 19.0913943  | 19.11894258 | 17.62305506 | 23.54492217 | 12.44232962 | 8.73656462  | 26.32041436 | 11.94243557 | 20.78415071 |
| ENSMUSG00000053916  | 0.267739298  | 2.691632799  | 0.034358787 | 0.852945713 | 0.999071534 | Nanp          | Nanp          | NANP         | 5.193322482 | 0.118580089 | 0           | 12.90507182 | 11.38004572 | 0           | 0           | 0           | 17.28510412 | 12.1567674  |
| ENSMUSG00000031429  | -0.049178502 | 6.320969164  | 0.034348621 | 0.852967222 | 0.999071534 | Psmid10       | Psmid10       | PSMD10       | 112.6389538 | 77.87482831 | 66.44505748 | 88.73971428 | 75.67076377 | 76.03645879 | 131.7603375 | 54.57513739 | 48.24115423 | 71.69878406 |
| ENSMUSG000000505050 | -0.114102989 | 3.272827712  | 0.034335289 | 0.852995433 | 0.999071534 | Gm11868       | Gm11868       |              | 14.80798708 | 14.2889007  | 2.760129034 | 7.215739081 | 12.75349951 | 16.58977283 | 23.94465859 | 2.901463001 | 1.257098482 | 2.548999616 |
| ENSMUSG000000082475 | 0.078369017  | 8.656666452  | 0.034325388 | 0.853016389 | 0.999071534 | Gm7206        | Gm7206        |              | 713.450221  | 556.3184867 | 204.5188294 | 278.7773041 | 299.8707449 | 388.1861317 | 967.6877834 | 255.3978265 | 173.1653158 | 257.1221664 |
| ENSMUSG00000026469  | 0.038579951  | 5.150138524  | 0.034324682 | 0.853017882 | 0.999071534 | Xpr1          | Xpr1          | XPR1         | 36.35325737 | 39.30929944 | 30.96730136 | 38.1601586  | 36.23301912 | 41.32890774 | 38.50559962 | 34.6793911  | 27.65616659 | 31.82981571 |
| ENSMUSG000000083218 | -0.186824979 | -0.382359116 | 0.034263247 | 0.853147981 | 0.999071534 | Gm16425       | Gm16425       |              | 1.754500839 | 1.067220799 | 0.471241542 | 0.069382107 | 0.130805123 | 1.819054038 | 0.517722348 | 0.138164905 | 0           | 0.653589645 |
| ENSMUSG00000028974  | 0.062094882  | 3.4578808    | 0.03426189  | 0.853150856 | 0.999071534 | Dffa          | Dffa          | DFFA         | 18.52752886 | 10.73149804 | 8.280387102 | 6.938210655 | 11.11843547 | 14.04309717 | 13.13720458 | 7.806317121 | 7.621159544 | 11.76461361 |
| ENSMUSG000000093593 | 0.170292238  | 2.30645532   | 0.034261312 | 0.85315208  | 0.999071534 | Gm20683       | Gm20683       | RHOT2        | 0           | 4.802493597 | 2.288887492 | 7.978942253 | 8.240722761 | 5.820972922 | 0           | 2.486968286 | 6.521198373 | 9.346331924 |
| ENSMUSG00000025381  | -0.045968281 | 6.33186197   | 0.034258122 | 0.85315884  | 0.999071534 | Cnpy2         | Cnpy2         | CNPY2        | 95.23430552 | 73.1639148  | 67.05093946 | 92.69449435 | 95.74935018 | 59.66497245 | 109.6277072 | 85.31682871 | 48.16258558 | 78.56147533 |

|                    |              |              |             |             |             |               |               |          |             |             |             |             |             |             |             |             |             |             |
|--------------------|--------------|--------------|-------------|-------------|-------------|---------------|---------------|----------|-------------|-------------|-------------|-------------|-------------|-------------|-------------|-------------|-------------|-------------|
| ENSMUSG00000042594 | -0.042526954 | 5.014087341  | 0.034228406 | 0.853221815 | 0.999071534 | Sh2b3         | Sh2b3         | SH2B3    | 37.47613791 | 28.45922132 | 37.83396383 | 33.37279325 | 32.30886543 | 48.31407525 | 21.29133155 | 30.3271966  | 23.0991846  | 33.26771293 |
| ENSMUSG00000043644 | 0.118363928  | 0.773953004  | 0.034218516 | 0.853242782 | 0.999071534 | 0610009L18Rik | 0610009L18Rik |          | 2.105401006 | 1.48225111  | 2.01960661  | 1.734552664 | 0.523220493 | 0.582097292 | 1.164875283 | 2.072473572 | 2.671334273 | 0.980384468 |
| ENSMUSG00000063576 | -0.039529169 | 5.661000058  | 0.034175471 | 0.853334069 | 0.999071534 | Klhdc3        | Klhdc3        | KLHDC3   | 54.52988606 | 50.51511783 | 54.79865936 | 53.70175047 | 51.73342622 | 67.15947509 | 41.87079488 | 35.23205072 | 50.44107657 | 46.07806998 |
| ENSMUSG00000001983 | -0.103540001 | 2.408070594  | 0.034174554 | 0.853336014 | 0.999071534 | Taco1         | Taco1         | TACO1    | 11.22880537 | 7.233385418 | 4.375814322 | 1.526406344 | 3.793348573 | 8.513172898 | 10.03087049 | 1.519813953 | 1.728510412 | 3.529384083 |
| ENSMUSG00000022043 | -0.065178254 | 6.126559363  | 0.034124909 | 0.853441375 | 0.999071534 | Trim35        | Trim35        | TRIM35   | 97.26952649 | 111.5838636 | 43.3542219  | 43.98825555 | 77.24042524 | 141.013069  | 100.3734202 | 40.3441522  | 28.28471584 | 39.73825042 |
| ENSMUSG00000060771 | 0.069410192  | 2.795367034  | 0.034107652 | 0.853478018 | 0.999071534 | Tsga10        | Tsga10        | TSGA10   | 7.71980369  | 7.174095373 | 8.415027543 | 3.399723221 | 8.044515076 | 5.23887563  | 7.765835218 | 6.977327692 | 5.264099892 | 8.104511599 |
| ENSMUSG00000061086 | 0.104794528  | 0.930287273  | 0.034090433 | 0.853514588 | 0.999071534 | MyI4          | MyI4          | MYL4     | 3.087921476 | 1.126510844 | 1.346404407 | 1.526406344 | 1.831271725 | 3.128772945 | 1.876743511 | 0.552659619 | 1.964216377 | 1.503256184 |
| ENSMUSG00000058446 | 0.037723474  | 5.299974156  | 0.034077292 | 0.853542506 | 0.999071534 | Znrf2         | Znrf2         | ZNRF2    | 44.7748614  | 39.2500094  | 41.94049727 | 37.81324807 | 37.47566779 | 51.58837252 | 43.6828231  | 32.19242282 | 30.0917949  | 36.92781495 |
| ENSMUSG00000014353 | 0.055880532  | 4.910359236  | 0.034057597 | 0.853584357 | 0.999071534 | Tmem87b       | Tmem87b       | TMEM87B  | 23.79103137 | 36.75982753 | 28.54377342 | 27.89160683 | 35.57899351 | 23.93875114 | 20.57946333 | 56.99302322 | 18.93504588 | 25.68607305 |
| ENSMUSG00000062619 | 0.054009493  | 4.155487258  | 0.034053732 | 0.853592571 | 0.999071534 | 2310039H08Rik | 2310039H08Rik | C6orf226 | 18.59770889 | 12.6880695  | 26.25488593 | 17.76181928 | 14.58477124 | 17.24463228 | 17.79670571 | 11.95126426 | 15.79229967 | 23.72530412 |
| ENSMUSG00000024986 | -0.078642607 | 2.557834413  | 0.033966175 | 0.853778785 | 0.999071534 | Hhex          | Hhex          | HHEX     | 11.64988557 | 4.387463286 | 6.597381593 | 2.567137942 | 5.820827982 | 9.386318836 | 4.853647011 | 4.490359406 | 4.556981996 | 4.379050622 |
| ENSMUSG00000058174 | 0.094495348  | 1.113985935  | 0.033936079 | 0.85384285  | 0.999071534 | Gm5148        | Gm5148        |          | 3.158101509 | 2.01586151  | 2.01960661  | 1.665170557 | 1.373453794 | 1.164194584 | 2.329750565 | 2.072473572 | 1.807079067 | 2.548999616 |
| ENSMUSG00000074238 | 0.042065045  | 5.094223693  | 0.033909133 | 0.853900233 | 0.999071534 | Ap1ar         | Ap1ar         | AP1AR    | 31.79155519 | 29.28928194 | 43.3542219  | 35.80116698 | 33.42070898 | 48.67788606 | 27.7628609  | 27.77114586 | 32.60599187 | 31.04550814 |
| ENSMUSG00000040648 | -0.046774787 | 5.018463094  | 0.033852104 | 0.85402176  | 0.999071534 | Ppip5k2       | Ppip5k2       | PPIP5K2  | 24.91391191 | 28.51851136 | 50.35552482 | 34.20537853 | 31.78564494 | 52.24323197 | 26.01554798 | 29.15279491 | 19.72073243 | 31.04550814 |
| ENSMUSG00000070520 | 0.041043343  | 4.79382844   | 0.03384805  | 0.854030404 | 0.999071534 | NdnI2         | NdnI2         |          | 28.70363372 | 23.65672772 | 30.89989114 | 25.53261521 | 32.63587824 | 32.67021052 | 28.08643737 | 24.80060041 | 25.3776756  | 24.18281687 |
| ENSMUSG00000041459 | -0.049290932 | 8.131798164  | 0.033816461 | 0.854097768 | 0.999071534 | Tardbp        | Tardbp        | TARDBP   | 306.4060264 | 202.4162116 | 379.3494416 | 300.9101961 | 288.4252966 | 357.1166888 | 281.7056725 | 203.3787398 | 236.2559459 | 262.5469604 |
| ENSMUSG00000087303 | 0.176895223  | -0.435742766 | 0.033813484 | 0.854104118 | 0.999071534 | Lipo2         | Lipo2         | LIPJ     | 0           | 0.237160178 | 0.471214542 | 1.873316877 | 0.327012808 | 0.291048646 | 0.517722348 | 0.552659619 | 1.099961171 | 0.522871716 |
| ENSMUSG00000031493 | -0.139411567 | 0.013784181  | 0.033796311 | 0.854140755 | 0.999071534 | Ggn           | Ggn           | GGN      | 0.140360067 | 0.652190488 | 1.077123525 | 1.248877918 | 1.63506404  | 0.291048646 | 0.647152935 | 1.036236786 | 0.864255206 | 1.045743432 |
| ENSMUSG00000047187 | -0.045275093 | 7.711249427  | 0.033786078 | 0.854162592 | 0.999071534 | Rab2a         | Rab2a         | RAB2A    | 181.1346666 | 193.5227049 | 263.5586626 | 238.8825928 | 223.8075658 | 225.2716521 | 209.3539744 | 198.9574629 | 164.7584697 | 198.3644573 |
| ENSMUSG00000078653 | 0.122928279  | 0.255261235  | 0.033785611 | 0.854163588 | 0.999071534 | Cntd1         | Cntd1         | CNTD1    | 1.473780704 | 0.592900444 | 1.683005509 | 1.179495811 | 0.327012808 | 0.873145938 | 0.841298815 | 1.174401691 | 0.785686551 | 1.633974113 |
| ENSMUSG00000087556 | 0.15234003   | -0.147672394 | 0.033728842 | 0.85428479  | 0.999071534 | Gm15764       | Gm15764       |          | 1.052700503 | 0.652190488 | 1.346404407 | 0.20814632  | 0.523220493 | 0.9459081   | 0.582437641 | 1.243484143 | 0           | 1.241820326 |
| ENSMUSG00000047879 | -0.04029792  | 6.620264031  | 0.033722833 | 0.854297626 | 0.999071534 | Usp14         | Usp14         | USP14    | 85.33892079 | 98.12502349 | 120.2339135 | 102.893664  | 109.941706  | 137.374961  | 106.6508037 | 80.96463421 | 63.01206139 | 90.39144791 |
| ENSMUSG00000038371 | -0.053230255 | 4.584509921  | 0.033662282 | 0.85442703  | 0.999071534 | Sbf2          | Sbf2          | SBF2     | 21.61545033 | 37.41201802 | 25.78364439 | 12.55816129 | 29.75816553 | 31.86982675 | 18.50857394 | 29.84361943 | 15.32088774 | 49.1161246  |
| ENSMUSG00000099241 | 0.165983621  | -0.506028605 | 0.03365122  | 0.854450684 | 0.999071534 | Gm20522       | Gm20522       |          | 0.210540101 | 1.48225111  | 0.403921322 | 0.20814632  | 0.457817931 | 0.291048646 | 0.323576467 | 0.759906976 | 0.078568655 | 1.437897219 |
| ENSMUSG00000040865 | 0.048469155  | 4.399762935  | 0.033637102 | 0.854480878 | 0.999071534 | Ino80d        | Ino80d        | INO80D   | 17.89590855 | 20.57364541 | 23.1581558  | 22.47980252 | 22.76009144 | 23.35665385 | 14.23736457 | 29.29095982 | 13.74951464 | 22.94099654 |
| ENSMUSG00000062866 | 0.104173275  | 1.783622078  | 0.03363057  | 0.85449485  | 0.999071534 | Phactr2       | Phactr2       | PHACTR2  | 3.509001677 | 6.640484974 | 3.231370576 | 0.693821065 | 2.616102464 | 8.076599929 | 3.365195261 | 1.657978857 | 1.335667137 | 3.267948225 |
| ENSMUSG00000091058 | -0.094853702 | 2.15456118   | 0.03362208  | 0.854513013 | 0.999071534 | Gm17538       | Gm17538       |          | 5.333682549 | 4.802493597 | 2.356207712 | 2.289609516 | 8.633138131 | 3.201535107 | 6.471529348 | 6.010173358 | 0.942823861 | 3.790819941 |
| ENSMUSG00000032596 | -0.060040523 | 4.265550502  | 0.033600106 | 0.854560031 | 0.999071534 | Uba7          | Uba7          | UBA7     | 26.31751258 | 22.35234674 | 16.42613376 | 16.79046978 | 19.68617104 | 25.53951869 | 6.083237587 | 25.07693022 | 14.29949523 | 20.19592003 |
| ENSMUSG00000032518 | 0.057840855  | 10.69037494  | 0.033577191 | 0.854609081 | 0.999071534 | Rpsa          | Rpsa          | RPSA     | 1743.201853 | 1099.237423 | 2116.009166 | 2124.341338 | 1265.670372 | 1113.915931 | 1720.00307  | 1411.28542  | 1917.93944  | 1711.228409 |
| ENSMUSG00000024384 | -0.040121806 | 5.099392029  | 0.03354583  | 0.854676239 | 0.999071534 | Iws1          | Iws1          | IWS1     | 31.37047499 | 35.21828638 | 40.99801419 | 32.19329744 | 40.15717282 | 46.56778337 | 33.00479967 | 33.57407186 | 19.40645781 | 33.85594361 |
| ENSMUSG00000067356 | 0.178294622  | 0.577994364  | 0.033544057 | 0.854680036 | 0.999071534 | B430203G13Rik | B430203G13Rik |          | 0.421080201 | 0.237160178 | 3.635291898 | 2.081463196 | 0.196207685 | 0.072762162 | 0.064715293 | 1.105319238 | 2.278490998 | 3.006512367 |
| ENSMUSG00000021385 | -0.054424378 | 3.607055751  | 0.033427194 | 0.854930582 | 0.999071534 | Ippk          | Ippk          | IPPK     | 12.28150587 | 13.2216799  | 14.06992605 | 10.75422652 | 13.53833025 | 17.53568093 | 15.07866338 | 10.0169556  | 7.85686551  | 7.97379367  |
| ENSMUSG00000086735 | 0.150636116  | 0.109978193  | 0.033414424 | 0.854957989 | 0.999071534 | Gm13977       | Gm13977       |          | 0.491260235 | 0.830060622 | 1.077123525 | 1.665170557 | 0.523220493 | 0.291048646 | 0.258861174 | 2.901463001 | 0.235705965 | 1.045743432 |
| ENSMUSG00000054793 | -0.104819433 | 0.480473548  | 0.033371756 | 0.855049596 | 0.999071534 | Cadm4         | Cadm4         | CADM4    | 1.122880537 | 1.600831199 | 1.077123525 | 1.457024238 | 1.504258917 | 2.255627007 | 1.164875283 | 0.690824524 | 0.785686551 | 1.176461361 |
| ENSMUSG00000046671 | -0.038478619 | 5.710560451  | 0.03336659  | 0.855060691 | 0.999071534 | Mtfr1l        | Mtfr1l        | MTFR1L   | 53.54736559 | 53.24245988 | 54.52937848 | 56.33827052 | 56.90022859 | 69.56062642 | 42.6473784  | 38.82433825 | 37.39867983 | 64.443939   |
| ENSMUSG00000026185 | 0.093253417  | 2.754793342  | 0.03335296  | 0.85508997  | 0.999071534 | Igfbp5        | Igfbp5        | IGFBP5   | 9.89584729  | 7.885575906 | 5.049016526 | 2.428373729 | 8.371527884 | 20.37340523 | 2.459181152 | 5.802926001 | 3.221314859 | 4.052255799 |
| ENSMUSG00000039578 | -0.080188144 | 2.172283829  | 0.033343467 | 0.855110366 | 0.999071534 | Ccser1        | Ccser1        | CCSER1   | 4.631882214 | 5.395394041 | 2.221567271 | 6.452535909 | 4.51277675  | 4.438491853 | 6.277383467 | 4.214029596 | 3.221314859 | 2.418281687 |
| ENSMUSG00000052253 | -0.037720546 | 5.963096487  | 0.033333557 | 0.855131166 | 0.999071534 | Zfp622        | Zfp622        | ZNF622   | 56.494927   | 75.89125684 | 63.8868891  | 60.70934323 | 70.56936396 | 65.92251834 | 50.93093597 | 63.90126846 | 52.87670488 | 62.02565732 |
| ENSMUSG00000022407 | 0.052681841  | 5.682957127  | 0.033332853 | 0.855133173 | 0.999071534 | Adsl          | Adsl          | ADSL     | 76.35587649 | 46.66126495 | 51.9712101  | 33.44217536 | 54.54573637 | 86.65973437 | 77.78778276 | 26.80399153 | 30.87748145 | 39.4114556  |

|                      |              |              |             |             |             |           |           |             |             |             |             |             |             |             |             |             |             |             |
|----------------------|--------------|--------------|-------------|-------------|-------------|-----------|-----------|-------------|-------------|-------------|-------------|-------------|-------------|-------------|-------------|-------------|-------------|-------------|
| ENSMUSG00000006463   | 0.048339072  | 3.928325475  | 0.033304531 | 0.855194049 | 0.999071534 | Zdhhc24   | Zdhhc24   | ZDHC24      | 16.14140771 | 16.71979252 | 15.34901024 | 12.28063286 | 16.80845833 | 22.62903223 | 15.79053161 | 13.47107822 | 9.506807267 | 14.57504908 |
| ENSMUSG000000026755  | 0.046794387  | 6.129883123  | 0.033226127 | 0.855362718 | 0.999071534 | Arpc5l    | Arpc5l    | ARPC5L      | 96.35718605 | 53.12387979 | 68.73394497 | 73.61441505 | 65.01014623 | 79.52904254 | 101.0852884 | 39.58424522 | 61.91210022 | 61.63350353 |
| ENSMUSG000000042810  | -0.118214371 | 0.209818059  | 0.033207096 | 0.855403688 | 0.999071534 | Krba1     | Krba1     | KRBA1       | 1.263240604 | 1.245090933 | 0.471241542 | 1.665170557 | 0.850233301 | 1.45524323  | 0.970729402 | 0.483577167 | 1.021392516 | 0.849666539 |
| ENSMUSG000000022899  | 0.07152813   | 2.990372037  | 0.033139868 | 0.855548518 | 0.999071534 | Slc15a2   | Slc15a2   | SLC15A2     | 8.983044293 | 4.683913508 | 10.36731393 | 10.33793388 | 4.90519212  | 7.567264798 | 4.724216424 | 8.220811835 | 8.563983406 | 8.888819173 |
| ENSMUSG000000016206  | 0.057123382  | 4.086735962  | 0.033132318 | 0.855564793 | 0.999071534 | H2-M3     | H2-M3     |             | 28.07201342 | 21.70015625 | 13.73332495 | 10.40731598 | 12.49188926 | 19.20921064 | 23.94465859 | 13.67832557 | 13.67094599 | 12.87571601 |
| ENSMUSG000000026035  | -0.053744432 | 4.726189335  | 0.033117159 | 0.855597476 | 0.999071534 | Ppil3     | Ppil3     | PPIL3       | 34.80929664 | 23.12311732 | 21.20586941 | 29.00172054 | 31.26242444 | 32.96125917 | 41.80607959 | 19.96482874 | 9.742513232 | 24.3135348  |
| ENSMUSG000000060019  | -0.176663445 | -0.230970868 | 0.033056031 | 0.855729343 | 0.999071534 | Gm10073   | Gm10073   |             | 0.701800335 | 0.059290044 | 0.471241542 | 1.179495811 | 1.504258917 | 1.236956746 | 1.229590576 | 0.898071881 | 0           | 0.065358965 |
| ENSMUSG000000048852  | 0.167667348  | -0.003572532 | 0.033008615 | 0.855831719 | 0.999071534 | Gm12185   | Gm12185   |             | 0.350900168 | 0.830060622 | 2.490848153 | 0.138764213 | 0.39241537  | 0.873145938 | 0.453007054 | 1.796143762 | 0           | 1.372538255 |
| ENSMUSG000000066647  | -0.082362765 | 1.636802318  | 0.032989156 | 0.855873754 | 0.999071534 | Gm5113    | Gm5113    |             | 4.35116208  | 3.142372354 | 3.029409915 | 3.260959008 | 2.092881971 | 2.546675653 | 2.912188207 | 2.970545453 | 1.807079067 | 3.725460977 |
| ENSMUSG000000035270  | 0.161658946  | -0.047624915 | 0.032867039 | 0.856137845 | 0.999071534 | Impg2     | Impg2     | IMPG2       | 0.842160403 | 0.296450222 | 0.538561763 | 1.873316877 | 0.457817931 | 0.072762162 | 0.906014109 | 1.519813953 | 0.078568655 | 1.633974113 |
| ENSMUSG000000053329  | -0.038701376 | 5.44965286   | 0.032860814 | 0.856151321 | 0.999071534 | D10Jhu81e | D10Jhu81e | CH507-982.3 | 42.10802013 | 37.6491782  | 46.78755314 | 49.19191354 | 53.10688002 | 40.60128613 | 44.39469133 | 40.41323465 | 37.24154252 | 43.33299347 |
| ENSMUSG000000027605  | 0.097169657  | 0.883652642  | 0.03284067  | 0.856194937 | 0.999071534 | Acss2     | Acss2     | ACSS2       | 1.19306057  | 2.253021687 | 1.548365068 | 1.248877918 | 2.354492217 | 2.110102684 | 1.617882337 | 2.556050739 | 0.707117896 | 1.699333077 |
| ENSMUSG000000021866  | -0.041053089 | 6.185738161  | 0.032824539 | 0.856229873 | 0.999071534 | Anxa11    | Anxa11    | ANXA11      | 89.69008287 | 84.2511531  | 58.70323214 | 63.62339171 | 87.90104278 | 93.35385323 | 64.71529348 | 83.10619023 | 39.44146486 | 72.41773267 |
| ENSMUSG000000032806  | 0.050354632  | 3.702752059  | 0.032759298 | 0.856371266 | 0.999071534 | Slc10a3   | Slc10a3   | SLC10A3     | 13.40438641 | 12.1544591  | 16.15685288 | 10.47669809 | 13.66913537 | 15.28005392 | 13.71964222 | 10.70778012 | 12.17814154 | 11.37245982 |
| ENSMUSG000000036086  | -0.07072367  | 2.475331376  | 0.032745797 | 0.856400543 | 0.999071534 | Zranb3    | Zranb3    | ZRANB3      | 5.895122818 | 5.336103997 | 4.039213221 | 7.285121188 | 6.213243352 | 8.58593506  | 4.724216424 | 2.970545453 | 4.635550651 | 5.163358196 |
| ENSMUSG000000027834  | -0.163656446 | 0.019500831  | 0.032726169 | 0.85644312  | 0.999071534 | Serpini1  | Serpini1  | SERPINI1    | 1.19306057  | 1.304380977 | 1.817645949 | 0.069382107 | 0.457817931 | 1.091432423 | 1.553167044 | 1.036236786 | 0.392843275 | 0           |
| ENSMUSG000000027272  | 0.046179069  | 3.988782573  | 0.032717271 | 0.856462425 | 0.999071534 | Ubr1      | Ubr1      | UBR1        | 14.94834714 | 15.05967128 | 17.16665619 | 14.50086027 | 18.83593774 | 19.8640701  | 14.94923279 | 14.02373784 | 13.04239675 | 15.88222837 |
| ENSMUSG000000046873  | 0.039855507  | 5.999451286  | 0.032711079 | 0.856475861 | 0.999071534 | Mbtps2    | Mbtps2    | MBTPS2      | 50.66998422 | 72.33385418 | 73.85028171 | 64.5947412  | 64.8793411  | 55.5902914  | 67.62748169 | 66.25007185 | 59.00050598 | 59.73809356 |
| ENSMUSG000000049929  | -0.11919027  | 0.660990003  | 0.032693419 | 0.85651419  | 0.999071534 | Lpar4     | Lpar4     | LPAR4       | 1.263240604 | 1.067220799 | 2.827449254 | 1.110113705 | 1.569661478 | 2.328389169 | 2.070889391 | 0.27632981  | 1.649941757 | 0.457512752 |
| ENSMUSG000000049303  | -0.099776905 | 1.295183765  | 0.032613021 | 0.856688812 | 0.999071534 | Syt12     | Syt12     | SYT12       | 2.596661241 | 3.379532531 | 2.490848153 | 2.983430582 | 0.915635862 | 2.692199976 | 3.106334087 | 1.865226215 | 0.471411931 | 3.006512367 |
| ENSMUSG000000039286  | -0.046319751 | 6.67212754   | 0.032577996 | 0.856764956 | 0.999071534 | Fndc3b    | Fndc3b    | FNDC3B      | 72.56615468 | 128.3036561 | 112.6940489 | 107.6810294 | 115.173911  | 118.3112746 | 59.99107706 | 112.5353149 | 104.1820367 | 84.18234628 |
| ENSMUSG000000024462  | 0.055004717  | 4.911076024  | 0.032571181 | 0.856779776 | 0.999071534 | Gabbr1    | Gabbr1    | GABBR1      | 21.5452703  | 26.14690958 | 37.69932339 | 33.51155746 | 33.09369617 | 23.93875114 | 14.69037162 | 43.86735727 | 23.0991846  | 39.93432731 |
| ENSMUSG000000039065  | 0.065904702  | 4.0331111    | 0.032568839 | 0.85678487  | 0.999071534 | Fam173b   | Fam173b   | FAM173B     | 26.52805268 | 16.71979252 | 13.06012275 | 13.04383603 | 13.40752513 | 21.46483765 | 29.12188207 | 6.839162787 | 7.306884924 | 18.0390742  |
| ENSMUSG000000037075  | 0.040365337  | 5.44034999   | 0.03256127  | 0.856801333 | 0.999071534 | Rnf139    | Rnf139    | RNF139      | 44.07306106 | 44.46753331 | 40.99801419 | 48.49809248 | 43.16569065 | 49.25998335 | 60.18522294 | 39.37699786 | 24.82769501 | 41.56830143 |
| ENSMUSG000000034892  | 0.049834563  | 9.109068688  | 0.032555445 | 0.856814004 | 0.999071534 | Rps29     | Rps29     | RPS29       | 565.5107103 | 413.6666398 | 668.2878273 | 664.7499628 | 490.8462248 | 464.004304  | 522.5112796 | 501.5386044 | 510.9319641 | 673.5241292 |
| ENSMUSG0000000019470 | 0.039131387  | 5.26736373   | 0.032550553 | 0.856824645 | 0.999071534 | Xab2      | Xab2      | XAB2        | 48.42422314 | 37.88633838 | 40.32481198 | 30.66689109 | 39.96096514 | 51.07903739 | 29.96318088 | 32.26150527 | 32.92026649 | 43.13691657 |
| ENSMUSG000000000266  | -0.049802896 | 4.016517974  | 0.032548558 | 0.856828985 | 0.999071534 | Mid2      | Mid2      | MID2        | 16.63266795 | 20.45506532 | 15.2143698  | 10.47669809 | 22.56388375 | 20.66445387 | 13.97850339 | 16.23437631 | 12.64955347 | 13.33322876 |
| ENSMUSG0000000018293 | 0.050346137  | 10.35619889  | 0.032510337 | 0.856912165 | 0.999071534 | Pfn1      | Pfn1      | PFN1        | 1119.511895 | 873.1051939 | 1792.131586 | 1333.107795 | 1556.777174 | 1353.521729 | 1119.445147 | 1261.169251 | 1247.82738  | 1398.485764 |
| ENSMUSG0000000020181 | 0.094553907  | 2.133914067  | 0.032448205 | 0.857047487 | 0.999071534 | Nav3      | Nav3      | NAV3        | 6.035482885 | 6.344034752 | 1.817645949 | 2.497755836 | 4.839789558 | 10.4049891  | 5.889091707 | 2.901463001 | 1.964216377 | 1.503256184 |
| ENSMUSG0000000018770 | 0.051425604  | 8.382370169  | 0.032447563 | 0.857048885 | 0.999071534 | Atp5g3    | Atp5g3    | ATP5G3      | 429.8527054 | 244.9271734 | 342.4579609 | 374.5246112 | 305.5607678 | 342.7097808 | 519.4049455 | 239.3016151 | 233.270337  | 315.8145165 |
| ENSMUSG0000000083679 | 0.150742824  | 2.091453886  | 0.032418113 | 0.857113075 | 0.999071534 | Gm12892   | Gm12892   |             | 12.49204597 | 1.48225111  | 2.894769475 | 0.624438959 | 3.139322957 | 8.58593506  | 12.03704459 | 0.207247357 | 0.392843275 | 1.372538255 |
| ENSMUSG0000000070605 | 0.066014296  | 3.194316313  | 0.03239162  | 0.857170843 | 0.999071534 | Gm13251   | Gm13251   |             | 10.0357448  | 11.6208487  | 7.741825339 | 7.770795933 | 8.698540692 | 9.604605321 | 15.72581632 | 7.460904859 | 3.614158135 | 9.084896066 |
| ENSMUSG0000000037235 | -0.048597721 | 6.125915555  | 0.032343441 | 0.857275964 | 0.999071534 | Mxd4      | Mxd4      | MXD4        | 62.24968975 | 62.13596654 | 83.54439344 | 94.49842912 | 62.98266682 | 67.66881022 | 40.05876666 | 53.88431287 | 79.90432223 | 82.35229528 |
| ENSMUSG0000000038495 | -0.039526937 | 5.950356769  | 0.032319925 | 0.857327302 | 0.999071534 | Otud7b    | Otud7b    | OTUD7B      | 57.05636727 | 70.14012253 | 58.29931082 | 63.69277381 | 75.6053612  | 69.7789129  | 41.02949607 | 71.29309087 | 49.73395868 | 62.15637524 |
| ENSMUSG0000000024810 | 0.162321157  | 1.852234381  | 0.032286565 | 0.857400163 | 0.999071534 | Ib3       | Ib3       | IL33        | 2.947561409 | 5.276813952 | 5.250977187 | 2.636520049 | 0.784830739 | 15.93491337 | 3.494625848 | 1.105319238 | 0           | 0.130717929 |
| ENSMUSG0000000027642 | -0.045225231 | 7.993476944  | 0.032239326 | 0.857503404 | 0.999071534 | Rpn2      | Rpn2      | RPN2        | 296.5106417 | 268.2874509 | 258.0384046 | 254.632331  | 266.5154385 | 341.1817754 | 300.99083   | 192.3255475 | 165.3084503 | 236.0765798 |
| ENSMUSG0000000029501 | 0.037053229  | 5.643769795  | 0.03213527  | 0.857731095 | 0.999071534 | Ankle2    | Ankle2    | ANKLE2      | 40.98513959 | 56.26625214 | 54.05813693 | 41.69864604 | 63.1788745  | 57.4821076  | 53.90783947 | 49.11762365 | 39.67717082 | 44.64017276 |
| ENSMUSG0000000026822 | -0.099719315 | 2.086990352  | 0.032105127 | 0.857797123 | 0.999071534 | Lcn2      | Lcn2      |             | 4.000261912 | 6.225454663 | 5.92417939  | 3.538487434 | 2.354492217 | 10.69603774 | 1.876743511 | 1.72706131  | 0.864255206 | 5.751588876 |
| ENSMUSG0000000039810 | -0.048089966 | 4.001703573  | 0.032081479 | 0.857848947 | 0.999071534 | Zc3h10    | Zc3h10    | ZC3H10      | 17.89590855 | 19.15068434 | 13.86796539 | 13.39074656 | 19.88237873 | 19.2819728  | 12.42533635 | 16.16529386 | 10.44963113 | 18.0390742  |

|                     |              |              |             |              |             |               |               |               |             |             |             |             |             |             |             |             |             |             |
|---------------------|--------------|--------------|-------------|--------------|-------------|---------------|---------------|---------------|-------------|-------------|-------------|-------------|-------------|-------------|-------------|-------------|-------------|-------------|
| ENSMUSG00000033961  | -0.077002434 | 1.938863988  | 0.03206859  | 0.857877202  | 0.999071534 | Zfp446        | Zfp446        | ZNF446        | 4.140621979 | 3.379532531 | 4.039213221 | 4.509836926 | 3.597140888 | 3.565345915 | 2.912188207 | 2.417885834 | 2.749902928 | 5.751588876 |
| ENSMUSG00000033542  | 0.039234294  | 5.447072124  | 0.03204249  | 0.857934435  | 0.999071534 | Arhgef5       | Arhgef5       | ARHGEF5       | 49.96818388 | 50.93014815 | 36.15095832 | 36.98066279 | 49.50973913 | 61.99336162 | 34.36382084 | 48.84129384 | 28.75612777 | 43.07155761 |
| ENSMUSG00000021893  | 0.038116691  | 5.344767313  | 0.032011812 | 0.858001736  | 0.999071534 | Capn7         | Capn7         | CAPN7         | 39.86225905 | 36.10763704 | 43.48886234 | 42.66999553 | 45.19317006 | 43.14796178 | 36.82300199 | 39.92965748 | 27.97044121 | 51.3721461  |
| ENSMUSG00000019254  | -0.042113721 | 6.241523471  | 0.031964481 | 0.858105635  | 0.999071534 | Ppp1r12c      | Ppp1r12c      | PPP1R12C      | 87.23378169 | 66.99775018 | 95.19079156 | 70.14530972 | 78.61387904 | 83.9675344  | 44.13583015 | 75.23079066 | 62.85492408 | 92.94044753 |
| ENSMUSG000000062729 | 0.051460777  | 3.98089291   | 0.031904141 | 0.858238208  | 0.999071534 | Ppox          | Ppox          | PPOX          | 17.75554849 | 16.9569527  | 10.77123525 | 13.39074656 | 21.32123508 | 15.42557824 | 14.36679515 | 20.310241   | 10.21392516 | 16.79725388 |
| ENSMUSG000000096719 | 0.188102628  | -0.044783571 | 0.031884735 | 0.858280872  | 0.999071534 | Mrgpra2b      | Mrgpra2b      | MRGPRX4       | 0           | 1.007930755 | 0.740522424 | 1.387642131 | 0.981038424 | 0.291048646 | 0.388291761 | 0.621742072 | 2.592765618 | 0           |
| ENSMUSG000000082362 | -0.20029778  | -0.833337207 | 0.031829089 | 0.858403283  | 0.999071534 | Gm5187        | Gm5187        |               | 0           | 0.592900444 | 0.201960661 | 1.248877918 | 0.261610246 | 0.218286485 | 0.258861174 | 1.243484143 | 0           | 0.196076894 |
| ENSMUSG000000027018 | 0.055678605  | 6.023398315  | 0.031736995 | 0.858606118  | 0.999071534 | Hat1          | Hat1          | HAT1          | 97.33970652 | 49.8036373  | 71.96531555 | 51.68966938 | 60.95518741 | 98.30168022 | 112.7340412 | 29.22187736 | 34.09879631 | 56.73158119 |
| ENSMUSG000000078970 | -0.055257345 | 4.217046943  | 0.031607194 | 0.858892517  | 0.999071534 | Wdr92         | Wdr92         | RP11-474G23.1 | 20.70310989 | 19.38784452 | 12.2522801  | 22.54918463 | 22.69468887 | 22.70179439 | 29.51017383 | 10.29328541 | 13.74951464 | 12.35284429 |
| ENSMUSG000000047428 | 0.102638699  | 1.108971018  | 0.031550361 | 0.859018108  | 0.999071534 | Dlk2          | Dlk2          | DLK2          | 2.947561409 | 1.067220799 | 0.875162864 | 2.22022741  | 3.073920395 | 2.110102684 | 2.9769035   | 0.759906976 | 2.671334273 | 1.437897219 |
| ENSMUSG000000091264 | -0.04103678  | 4.714003497  | 0.031526088 | 0.859071782  | 0.999071534 | Smim13        | Smim13        | SMIM13        | 26.94913288 | 29.1114118  | 22.61959403 | 27.47531419 | 31.39322957 | 31.14220513 | 24.39766564 | 18.44501479 | 20.74212495 | 30.45727746 |
| ENSMUSG000000016946 | 0.035608298  | 5.63346732   | 0.031498172 | 0.859133538  | 0.999071534 | Kctd5         | Kctd5         | KCTD5         | 50.38926408 | 45.0011437  | 58.5685917  | 46.41662928 | 53.63010051 | 61.12021568 | 54.81385358 | 50.43019025 | 34.80591421 | 43.59442932 |
| ENSMUSG000000044308 | 0.036449295  | 5.385091657  | 0.031457309 | 0.859223986  | 0.999071534 | Ubr3          | Ubr3          | UBR3          | 45.05558153 | 47.60990566 | 36.4202392  | 41.42111761 | 43.10028809 | 48.82341038 | 35.26983495 | 40.75864691 | 37.7915231  | 40.78399385 |
| ENSMUSG000000002459 | 0.090326625  | 1.944533052  | 0.031452356 | 0.859234956  | 0.999071534 | Rgs20         | Rgs20         | RG520         | 1.824680872 | 3.972432975 | 4.173853661 | 2.358991623 | 6.474853598 | 2.546675653 | 3.753487022 | 4.973936572 | 4.949825271 | 1.568615148 |
| ENSMUSG000000028191 | 0.038084279  | 6.281381645  | 0.031444597 | 0.859252138  | 0.999071534 | Bcl10         | Bcl10         | BCL10         | 86.18108119 | 74.46829578 | 81.32282617 | 74.44700033 | 81.68779943 | 87.53288031 | 105.615359  | 69.77327692 | 56.41229436 | 63.39819557 |
| ENSMUSG000000019080 | -0.062915602 | 2.836433141  | 0.031433023 | 0.8592777772 | 0.999071534 | Mfsd3         | Mfsd3         | MFSD3         | 9.895384729 | 6.936935196 | 7.203263577 | 5.481186417 | 7.848307392 | 7.858313444 | 8.218842272 | 5.18118393  | 4.085570065 | 8.235229528 |
| ENSMUSG000000063882 | 0.051999393  | 8.005217748  | 0.031431393 | 0.859281382  | 0.999071534 | Uqcrh         | Uqcrh         | UQCRHL        | 344.2330645 | 227.6144805 | 232.5913613 | 291.1273191 | 210.9232611 | 180.3773984 | 368.3594505 | 205.6584608 | 219.2851164 | 270.4553951 |
| ENSMUSG000000018449 | -0.047535566 | 4.470508461  | 0.031429873 | 0.859284749  | 0.999071534 | Rpain         | Rpain         | RPAN          | 29.96687432 | 16.66050248 | 26.45684659 | 23.65929833 | 19.42456079 | 17.75396741 | 24.72124211 | 26.45857927 | 14.53520119 | 20.71879175 |
| ENSMUSG000000081904 | -0.16863863  | -0.49428568  | 0.031388887 | 0.859375573  | 0.999071534 | Gm13419       | Gm13419       |               | 0.350900168 | 0.177870133 | 0.471241542 | 1.387642131 | 0.719428178 | 0.436572969 | 0.129430587 | 1.105319238 | 0           | 0.980384468 |
| ENSMUSG000000036890 | 0.066661843  | 3.20580178   | 0.031369421 | 0.859418173  | 0.999071534 | Gtdc1         | Gtdc1         | GTDC1         | 4.702062247 | 8.47847635  | 11.17515658 | 11.10113705 | 10.39900729 | 8.003837767 | 7.312828163 | 10.77686257 | 11.15674902 | 6.405178521 |
| ENSMUSG000000039682 | 0.044199486  | 6.409962398  | 0.031356415 | 0.859447574  | 0.999071534 | Lap3          | Lap3          | LAP3          | 110.6739129 | 94.9233611  | 73.58100083 | 64.45597698 | 92.67542978 | 118.3112746 | 125.8712458 | 62.65778432 | 58.14080477 | 60.06488838 |
| ENSMUSG000000023068 | -0.045311948 | 7.700503697  | 0.031332099 | 0.859501514  | 0.999071534 | Nus1          | Nus1          | NUS1          | 249.4900192 | 275.4022563 | 173.3495674 | 191.0783214 | 209.6152099 | 238.5143655 | 265.5915644 | 179.1998815 | 136.3166166 | 180.52146   |
| ENSMUSG000000033949 | -0.109293224 | 0.507186827  | 0.031306698 | 0.859557883  | 0.999071534 | Trim36        | Trim36        | TRIM36        | 1.122880537 | 1.304380977 | 1.077123525 | 2.358991623 | 0.981038424 | 1.600767553 | 1.100159989 | 1.105319238 | 0.31427462  | 2.0261279   |
| ENSMUSG000000025873 | 0.035781851  | 6.128414284  | 0.031292208 | 0.859590051  | 0.999071534 | Faf2          | Faf2          | FAF2          | 66.81139193 | 69.54722209 | 74.18688282 | 77.15290248 | 69.45752041 | 86.00487492 | 60.63822999 | 65.14475261 | 60.10502115 | 70.65304063 |
| ENSMUSG000000034863 | 0.041191367  | 5.424503543  | 0.031281332 | 0.8596142    | 0.999071534 | Ano8          | Ano8          | ANO8          | 59.86356861 | 46.00907446 | 40.59409287 | 34.69105327 | 38.78371903 | 57.04553463 | 32.16350086 | 47.7359746  | 26.16336215 | 50.4571206  |
| ENSMUSG000000012126 | -0.086298409 | 1.365746751  | 0.03127983  | 0.859617536  | 0.999071534 | Ubxn11        | Ubxn11        | UBXN11        | 3.930081878 | 2.134441599 | 2.154247051 | 2.22022741  | 2.681505025 | 2.473913492 | 1.164875283 | 2.694215643 | 2.435628308 | 2.548999616 |
| ENSMUSG000000024258 | 0.042201084  | 5.047372398  | 0.031267745 | 0.859644376  | 0.999071534 | Polr2d        | Polr2d        | POLR2D        | 33.6864161  | 28.87425163 | 33.86207083 | 40.17223969 | 31.19702188 | 34.19821592 | 44.13583015 | 22.17546722 | 29.62038297 | 30.71871332 |
| ENSMUSG000000037362 | -0.102054638 | 0.947490211  | 0.031211822 | 0.859768644  | 0.999071534 | Nov           | Nov           | NOV           | 2.666841275 | 1.600831199 | 2.356207712 | 1.179495811 | 1.896674286 | 2.110102684 | 3.17104938  | 0.483577167 | 1.649941757 | 0.980384468 |
| ENSMUSG000000027281 | -0.065607211 | 2.666694787  | 0.03113759  | 0.859933778  | 0.999071534 | Slx4ip        | Slx4ip        | SLX4IP        | 7.088183388 | 8.063446039 | 8.953589305 | 4.579219032 | 4.381971627 | 8.513172898 | 5.75966112  | 4.835771668 | 4.556981996 | 6.143742663 |
| ENSMUSG000000036825 | -0.050004653 | 4.30806089   | 0.031079939 | 0.860062162  | 0.999071534 | Ssx2lp        | Ssx2lp        | SSX2IP        | 25.54553221 | 18.32062372 | 21.94639183 | 14.8477708  | 23.80653242 | 34.99859969 | 21.16190097 | 10.77686257 | 13.04239675 | 16.92797181 |
| ENSMUSG000000040102 | 0.045758335  | 4.324738141  | 0.031066454 | 0.860092211  | 0.999071534 | Klhl42        | Klhl42        | KLHL42        | 17.68536845 | 14.88180115 | 20.26338632 | 24.14497308 | 24.39515548 | 29.54143758 | 16.17882337 | 17.13244819 | 17.6779744  | 18.30051006 |
| ENSMUSG000000030798 | -0.098201769 | 1.80530482   | 0.031044613 | 0.860140894  | 0.999071534 | Cd37          | Cd37          | CD37          | 3.859901845 | 3.438822576 | 3.366011017 | 3.330341114 | 4.054958819 | 4.947826984 | 6.406814054 | 2.970545453 | 1.492804447 | 0.392153787 |
| ENSMUSG000000030727 | -0.057215368 | 3.748787589  | 0.030981704 | 0.860281212  | 0.999071534 | Rabep2        | Rabep2        | RABEP2        | 18.38716879 | 14.34819075 | 12.18495988 | 8.187088573 | 17.92030188 | 11.86023233 | 9.642578728 | 16.64887103 | 14.22092657 | 9.215613995 |
| ENSMUSG000000080242 | -0.090454295 | 5.290964911  | 0.030981022 | 0.860282735  | 0.999071534 | Gm15487       | Gm15487       |               | 44.42396123 | 68.30213116 | 17.50325729 | 23.72868044 | 57.03103371 | 59.88325893 | 75.32860161 | 33.64315432 | 2.78490998  | 22.48348379 |
| ENSMUSG000000021671 | 0.062516904  | 3.454389367  | 0.030919877 | 0.860419261  | 0.999071534 | Poc5          | Poc5          | POC5          | 18.73806896 | 8.893506661 | 8.953589305 | 8.880909638 | 9.810384239 | 16.95358363 | 15.01394809 | 6.908245239 | 5.421237202 | 11.045665   |
| ENSMUSG000000018861 | -0.05411341  | 3.553894344  | 0.030911509 | 0.860437957  | 0.999071534 | Fdxr          | Fdxr          | FDXR          | 16.00104765 | 9.427117061 | 10.83855548 | 9.991023343 | 15.43500454 | 14.26138366 | 13.8490728  | 7.668152216 | 9.271101302 | 10.45743432 |
| ENSMUSG000000013353 | -0.17045594  | -0.226729611 | 0.03088437  | 0.860498605  | 0.999071534 | 4931406B18Rik | 4931406B18Rik |               | 1.684320805 | 0.415030311 | 1.077123525 | 0.624438959 | 0.261610246 | 0.363810808 | 0           | 0.138164905 | 1.807079067 | 0.71894861  |
| ENSMUSG000000039599 | -0.043507851 | 4.537860228  | 0.030880537 | 0.860507173  | 0.999071534 | Fam149b       | Fam149b       | FAM149B1      | 23.29977714 | 31.06798327 | 22.41763337 | 16.37417715 | 29.23494503 | 25.17570789 | 24.39766564 | 22.03730231 | 14.92804447 | 24.3135348  |
| ENSMUSG000000025176 | 0.149363248  | -0.087946758 | 0.030855514 | 0.860563123  | 0.999071534 | Hoga1         | Hoga1         | HOGA1         | 0           | 0.652190488 | 1.077123525 | 1.526406344 | 0.654025616 | 0.363810808 | 0.647152935 | 0.690824524 | 0.628549241 | 1.699333077 |

|                      |              |              |             |             |             |               |               |               |             |             |             |             |             |             |             |             |             |             |             |
|----------------------|--------------|--------------|-------------|-------------|-------------|---------------|---------------|---------------|-------------|-------------|-------------|-------------|-------------|-------------|-------------|-------------|-------------|-------------|-------------|
| ENSMUSG00000056666   | 0.044497359  | 4.546671285  | 0.03085057  | 0.86057418  | 0.999071534 | Retsat        | Retsat        | RETSAT        | 28.35273355 | 21.87802639 | 17.57057751 | 24.70002993 | 26.35723232 | 26.33990247 | 32.03407027 | 18.03052007 | 17.75651605 | 20.52271485 |             |
| ENSMUSG00000070056   | -0.045474468 | 5.04049637   | 0.030833535 | 0.860612285 | 0.999071534 | Mfhas1        | Mfhas1        | MFHAS1        | 29.40543405 | 33.67674522 | 34.53527304 | 34.76043538 | 40.3533805  | 46.7133077  | 16.11410808 | 25.42234248 | 31.58459935 | 36.92781495 |             |
| ENSMUSG000000001665  | -0.049557274 | 4.525224257  | 0.030803065 | 0.860680471 | 0.999071534 | Gstt3         | Gstt3         |               | 26.94913288 | 17.60914319 | 14.94508892 | 29.48739528 | 31.72024237 | 21.39207549 | 23.36222095 | 16.44162367 | 18.38506529 | 28.69258542 |             |
| ENSMUSG000000063320  | 0.077765509  | 1.917845941  | 0.030761507 | 0.860773522 | 0.999071534 | 1190007107Rik | 1190007107Rik | C12orf73      | 3.789721811 | 2.490181865 | 3.231370576 | 5.61995063  | 3.139322957 | 2.764962138 | 4.400639957 | 3.246875263 | 3.614158135 | 3.725460977 |             |
| ENSMUSG000000009549  | -0.046546996 | 7.411163493  | 0.030760124 | 0.860776622 | 0.999071534 | Srp14         | Srp14         | SRP14         | 199.5218354 | 133.4025999 | 182.3031567 | 215.6395872 | 162.5907681 | 131.7722745 | 211.6190097 | 150.1852515 | 143.3092269 | 160.9137706 |             |
| ENSMUSG000000045658  | 0.052716451  | 4.814098897  | 0.030735506 | 0.860831775 | 0.999071534 | Pid1          | Pid1          | PID1          | 36.91469764 | 29.58573216 | 19.859465   | 25.4632331  | 31.39322957 | 49.18722119 | 43.10038546 | 18.99767441 | 12.57098482 | 20.261279   |             |
| ENSMUSG000000047719  | 0.058487996  | 3.510542063  | 0.030725859 | 0.860853394 | 0.999071534 | Ubiad1        | Ubiad1        | UBIAD1        | 13.61492651 | 12.62877946 | 8.549667983 | 8.811527532 | 13.99614818 | 18.918162   | 15.27280926 | 6.977327692 | 6.442629718 | 9.934562605 |             |
| ENSMUSG000000026280  | -0.039976454 | 4.924371454  | 0.03072246  | 0.860861012 | 0.999071534 | Atg4b         | Atg4b         | ATG4B         | 34.38821644 | 38.65710895 | 22.28299293 | 28.16913526 | 36.102214   | 36.59936725 | 30.35147264 | 32.33058772 | 21.44924284 | 24.64032962 |             |
| ENSMUSG000000044244  | 0.110105809  | 0.408557767  | 0.030694018 | 0.860924777 | 0.999071534 | Il20rb        | Il20rb        | IL20RB        | 0.701800335 | 0.830060622 | 2.01960661  | 0.971349492 | 1.438856355 | 1.236956746 | 1.68259763  | 1.657978857 | 0.942823861 | 0.457512752 |             |
| ENSMUSG000000034910  | 0.06939923   | 3.127555682  | 0.030639339 | 0.861047446 | 0.999071534 | Pygo1         | Pygo1         | PYGO1         | 5.263502516 | 9.367827016 | 7.135943356 | 8.533999106 | 13.34212257 | 6.912405345 | 4.206494076 | 12.29667653 | 7.306884924 | 11.17638293 |             |
| ENSMUSG000000079608  | -0.095835701 | 1.83825026   | 0.030616518 | 0.861098677 | 0.999071534 | Stard6        | Stard6        | STARD6        | 1.824680872 | 5.098943819 | 3.971893    | 4.579219032 | 2.87771271  | 1.8918162   | 1.68259763  | 6.148338263 | 4.242707375 | 1.372538255 |             |
| ENSMUSG000000035285  | 0.109154794  | 0.616096596  | 0.030600079 | 0.861135593 | 0.999071534 | Nat14         | Nat14         | NAT14         | 2.807201342 | 1.600831199 | 0.740522424 | 0.416292639 | 1.504258917 | 2.255627007 | 1.035444696 | 1.796143762 | 0.628549241 | 1.503256184 |             |
| ENSMUSG000000035372  | -0.042640968 | 4.432914617  | 0.030539925 | 0.861270767 | 0.999071534 | 1810055G02Rik | 1810055G02Rik | C11orf24      | 16.77302802 | 25.96903945 | 22.28299293 | 21.2309246  | 26.88045282 | 27.14028625 | 24.59181152 | 18.16868498 | 15.3994564  | 18.16979213 |             |
| ENSMUSG000000093661  | -0.053032403 | 5.581313567  | 0.030508542 | 0.861341341 | 0.999071534 | Eif4e3        | Eif4e3        | EIF4E3        | 51.37178455 | 36.70053749 | 60.18427699 | 65.84361911 | 36.42922681 | 44.74872934 | 23.29750565 | 34.88663846 | 62.61921811 | 53.72506882 |             |
| ENSMUSG000000001100  | -0.044059998 | 5.659988782  | 0.030455781 | 0.861460077 | 0.999071534 | Poldip2       | Poldip2       | POLDIP2       | 62.81113002 | 60.83158556 | 42.54637926 | 43.71072713 | 56.96563115 | 65.84975618 | 77.52892159 | 35.37021563 | 25.22053829 | 42.54868589 |             |
| ENSMUSG000000045027  | -0.141876315 | 0.227664413  | 0.030450591 | 0.861471763 | 0.999071534 | Prs22         | Prs22         | PRS522        | 1.543960738 | 1.363671021 | 0.740522424 | 0.555056852 | 1.504258917 | 0.072762162 | 0.841298815 | 2.763298096 | 0.628549241 | 0.261435858 |             |
| ENSMUSG000000030041  | 0.100540722  | 0.870633067  | 0.030427124 | 0.861524613 | 0.999071534 | M1ap          | M1ap          | M1AP          | 1.824680872 | 0.770770577 | 2.692808814 | 1.734552664 | 1.438856355 | 2.40115133  | 1.876743511 | 1.796143762 | 0.392843275 | 2.287563758 |             |
| ENSMUSG000000044876  | -0.050216725 | 3.801578964  | 0.030397073 | 0.861592321 | 0.999071534 | Zfp444        | Zfp444        | ZNF444        | 14.17636678 | 11.56155866 | 17.83985839 | 12.00310443 | 17.52788651 | 15.35281608 | 9.901439902 | 13.95465538 | 9.821081887 | 16.86261284 |             |
| ENSMUSG000000036054  | 0.051036215  | 3.989910419  | 0.030378906 | 0.86163327  | 0.999071534 | Sugp2         | Sugp2         | SUGP2         | 16.63266795 | 16.18618212 | 17.43593707 | 10.5460802  | 20.01318385 | 20.66445387 | 11.06631518 | 14.30006765 | 9.899650542 | 22.87563758 |             |
| ENSMUSG000000044847  | 0.050280526  | 3.806895851  | 0.030371194 | 0.861650657 | 0.999071534 | Lsm11         | Lsm11         | LSM11         | 14.66762701 | 13.99245048 | 12.05031944 | 17.55367296 | 12.16487646 | 21.53759981 | 12.10175988 | 14.78364481 | 8.17114013  | 13.39858772 |             |
| ENSMUSG000000049396  | 0.051194827  | 4.178646201  | 0.030368398 | 0.861656961 | 0.999071534 | Gemin4        | Gemin4        | GEMIN4        | 22.45761073 | 15.23754141 | 20.46534698 | 14.29271395 | 19.55536592 | 36.09003212 | 18.12028217 | 11.53676955 | 13.27810271 | 12.94107497 |             |
| ENSMUSG000000001833  | 0.046820183  | 7.900826411  | 0.030368187 | 0.861657438 | 0.999071534 |               | 7-Sep         | 7-Sep         | 7-Sep       | 236.9979733 | 210.1832074 | 246.0554053 | 292.1680507 | 229.301381  | 253.2850843 | 345.3855213 | 209.1125834 | 184.1649275 | 183.6586903 |
| ENSMUSG000000073139  | -0.041344298 | 5.233324382  | 0.030362818 | 0.861669543 | 0.999071534 | BC023829      | BC023829      | TMEM185A      | 29.40543405 | 45.0011437  | 36.89148075 | 36.98066279 | 49.24812888 | 33.83440511 | 33.32837614 | 48.84129384 | 28.5204218  | 32.67948225 |             |
| ENSMUSG000000025911  | 0.118620693  | 0.716006402  | 0.03034229  | 0.861715841 | 0.999071534 | Adhfe1        | Adhfe1        | ADHFE1        | 0.561440268 | 0.474320355 | 2.221567271 | 2.22022741  | 2.027479409 | 0.873145938 | 0.970729402 | 0.828989429 | 2.985608894 | 1.503256184 |             |
| ENSMUSG000000039234  | 0.039341754  | 6.747799219  | 0.030339763 | 0.861721543 | 0.999071534 | Sec24d        | Sec24d        | SEC24D        | 86.67234142 | 136.189232  | 108.5201952 | 90.33550273 | 129.3008643 | 133.4458042 | 94.2901826  | 115.436778  | 90.51109067 | 93.7247551  |             |
| ENSMUSG0000000051224 | 0.068131964  | 2.489861926  | 0.030309351 | 0.861790166 | 0.999071534 | Tceanc        | Tceanc        | TCEANC        | 5.54422265  | 5.691844263 | 8.145746661 | 3.469105327 | 5.035997243 | 5.457162114 | 4.141778783 | 6.908245239 | 5.421237202 | 4.836563373 |             |
| ENSMUSG000000027963  | -0.037983226 | 4.916570487  | 0.03029464  | 0.861823374 | 0.999071534 | Extl2         | Extl2         | EXTL2         | 27.79129328 | 28.93354167 | 28.74573409 | 34.34414274 | 38.12969341 | 33.83440511 | 28.53944442 | 25.9750021  | 23.9634398  | 31.43766193 |             |
| ENSMUSG000000054640  | 0.225179598  | -0.041746351 | 0.030239197 | 0.861948602 | 0.999071534 | Slc8a1        | Slc8a1        | SLC8A1        | 1.19306057  | 2.01586151  | 0           | 0.416292639 | 0.327012808 | 3.201535107 | 1.68259763  | 0           | 0           | 0           |             |
| ENSMUSG000000033111  | -0.045630719 | 4.815810713  | 0.030225464 | 0.861979639 | 0.999071534 | 3830406C13Rik | 3830406C13Rik | C3orf14       | 25.05427197 | 20.33648523 | 32.65030687 | 35.17672802 | 34.00933203 | 20.44616739 | 28.02172208 | 24.6624355  | 23.72773384 | 34.37881533 |             |
| ENSMUSG000000074519  | 0.112896514  | 1.176752985  | 0.03018392  | 0.862073573 | 0.999071534 | Etoh1l        | Etoh1l        | ZNF788        | 0.771980369 | 4.268883197 | 1.413724627 | 1.457024238 | 2.681505025 | 1.819054038 | 4.918362304 | 1.105319238 | 0.31427462  | 2.745076509 |             |
| ENSMUSG000000005534  | 0.043053868  | 5.24082114   | 0.030180062 | 0.862082299 | 0.999071534 | Insr          | Insr          | INSR          | 29.47561409 | 51.87878886 | 42.88298036 | 30.31998056 | 38.45670622 | 33.32506998 | 28.34529854 | 47.32147989 | 34.09879631 | 38.95394284 |             |
| ENSMUSG000000050705  | 0.053052251  | 3.981824838  | 0.030160033 | 0.862127612 | 0.999071534 | 2310061I04Rik | 2310061I04Rik | C6orf136      | 12.562226   | 9.427117061 | 20.5326672  | 18.24749402 | 18.77053518 | 16.00767553 | 11.71346812 | 16.23437631 | 12.41384751 | 20.52271485 |             |
| ENSMUSG000000068015  | 0.055521143  | 3.820687466  | 0.030132134 | 0.862190757 | 0.999071534 | Lrch1         | Lrch1         | LRCH1         | 15.01852718 | 16.9569527  | 13.19476319 | 7.354503294 | 19.35915823 | 18.26330254 | 8.607134033 | 18.44501479 | 11.31388633 | 12.67963911 |             |
| ENSMUSG000000030647  | 0.048474799  | 7.042814196  | 0.030099053 | 0.86226567  | 0.999071534 | Ndufc2        | Ndufc2        | NDUFC2-KCTD14 | 151.8695926 | 86.32630466 | 136.1888058 | 181.8505013 | 111.445965  | 95.82776672 | 151.8867938 | 118.7527357 | 127.4383586 | 139.5413892 |             |
| ENSMUSG000000031227  | -0.058902697 | 3.911168853  | 0.030079922 | 0.862309011 | 0.999071534 | Magee1        | Magee1        | MAGEE1        | 8.491784059 | 12.6880695  | 17.36861685 | 21.57783514 | 18.24731469 | 16.51701067 | 7.183397576 | 14.30006765 | 15.63516236 | 16.07830527 |             |
| ENSMUSG000000023411  | -0.085070955 | 1.918660311  | 0.030079452 | 0.862310076 | 0.999071534 | Nfatc4        | Nfatc4        | NFATC4        | 6.175842952 | 3.794562842 | 5.183656966 | 1.665170557 | 2.812310149 | 4.584016176 | 5.565515239 | 3.108710358 | 1.099961171 | 3.267948225 |             |
| ENSMUSG0000000096177 | -0.119404952 | 0.197284494  | 0.030076873 | 0.86231592  | 0.999071534 | Gm5070        | Gm5070        |               | 0.771980369 | 0.770770577 | 1.279084186 | 1.526406344 | 1.111843547 | 1.600767553 | 0.776583522 | 0.552659619 | 1.492804447 | 0.261435858 |             |
| ENSMUSG000000072476  | 0.081627781  | 2.182521857  | 0.030068267 | 0.862335424 | 0.999071534 | Gm9008        | Gm9008        | RNF26         | 4.631882214 | 5.81        |             |             |             |             |             |             |             |             |             |

|                    |              |              |             |             |             |               |               |          |             |             |             |             |             |             |             |             |             |             |
|--------------------|--------------|--------------|-------------|-------------|-------------|---------------|---------------|----------|-------------|-------------|-------------|-------------|-------------|-------------|-------------|-------------|-------------|-------------|
| ENSMUSG00000032549 | 0.07728441   | 1.832360087  | 0.029916497 | 0.862679834 | 0.999071534 | Rab6b         | Rab6b         | RAB6B    | 3.649361744 | 3.49811262  | 3.096730136 | 3.538487434 | 3.531738326 | 4.729540499 | 3.041618794 | 1.519813953 | 4.085570065 | 3.594743048 |
| ENSMUSG00000028345 | -0.036168465 | 5.029778882  | 0.029910087 | 0.862694401 | 0.999071534 | Tex10         | Tex10         | TEX10    | 32.91443573 | 39.01284922 | 29.68821717 | 34.76043538 | 34.53255252 | 35.94450779 | 30.54561852 | 32.46875263 | 26.00622484 | 30.39191849 |
| ENSMUSG00000052477 | 0.083702802  | 1.500324529  | 0.029853668 | 0.862822677 | 0.999071534 | C130026l21Rik | C130026l21Rik | SP140    | 1.894860906 | 4.624623464 | 2.558168373 | 2.567137942 | 1.896674286 | 3.856394561 | 2.588611739 | 1.865226215 | 1.492804447 | 3.92153787  |
| ENSMUSG00000024014 | -0.07714393  | 5.939749874  | 0.02984315  | 0.862846603 | 0.999071534 | Pim1          | Pim1          | PIM1     | 57.40726744 | 113.6590151 | 70.41695048 | 26.29581838 | 61.54381046 | 30.48734568 | 17.92613629 | 140.0992135 | 39.52003351 | 52.4832485  |
| ENSMUSG00000086502 | 0.088626461  | 1.490014854  | 0.029797478 | 0.862950554 | 0.999071534 | B130055M24Rik | B130055M24Rik |          | 4.982782381 | 1.719411288 | 3.096730136 | 1.734552664 | 2.027479409 | 4.438491853 | 2.135604685 | 1.243484143 | 3.142746204 | 2.483640651 |
| ENSMUSG00000056665 | -0.059939004 | 4.815214915  | 0.029761188 | 0.86303321  | 0.999071534 | Them6         | Them6         | THEM6    | 45.54684177 | 25.25755892 | 26.99540836 | 22.13289199 | 29.36575016 | 46.56778337 | 50.21906774 | 14.30006765 | 12.02100423 | 15.68615148 |
| ENSMUSG00000025728 | -0.041960337 | 5.149549572  | 0.029706083 | 0.863158818 | 0.999071534 | Pigq          | Pigq          | PIGQ     | 44.28360116 | 36.5819574  | 34.93919436 | 31.29133005 | 39.76475745 | 59.15563732 | 37.01714787 | 20.10299365 | 22.70634132 | 35.1631229  |
| ENSMUSG00000078817 | 0.113301472  | 0.384673055  | 0.029661924 | 0.863259565 | 0.999071534 | Nlrp12        | Nlrp12        | NLRP12   | 2.526481208 | 1.245090933 | 0.807842644 | 0.485674746 | 0.850233301 | 0.9459081   | 2.070889391 | 1.105319238 | 1.099961171 | 0.588230681 |
| ENSMUSG00000030316 | 0.048928356  | 4.011273875  | 0.029631055 | 0.863330034 | 0.999071534 | Tamm41        | Tamm41        | TAMM41   | 16.84320805 | 12.56948941 | 20.26338632 | 17.76181928 | 13.93074562 | 26.70371328 | 15.20809397 | 14.3691501  | 12.72812213 | 11.37245982 |
| ENSMUSG00000022305 | 0.042342045  | 4.793412911  | 0.029626089 | 0.863341376 | 0.999071534 | Lrp12         | Lrp12         | LRP12    | 25.26481208 | 32.43165429 | 31.16926202 | 24.3531194  | 28.12310149 | 39.50985371 | 32.29293145 | 31.50159829 | 16.49941757 | 18.56194592 |
| ENSMUSG00000025208 | -0.038504935 | 5.479050438  | 0.02959513  | 0.863412095 | 0.999071534 | Mrpl43        | Mrpl43        | MRPL43   | 58.10906777 | 36.5819574  | 48.47055865 | 47.6655072  | 42.96948297 | 47.58645364 | 55.13743004 | 31.7779281  | 34.96305152 | 43.07155761 |
| ENSMUSG00000045316 | -0.053119547 | 3.500050836  | 0.029516482 | 0.863591923 | 0.999071534 | Fahd1         | Fahd1         | FAHD1    | 8.140883891 | 10.67220799 | 14.47384737 | 13.11321814 | 12.49188926 | 10.62327558 | 12.03704459 | 10.0169556  | 8.092571475 | 12.22212636 |
| ENSMUSG00000063001 | -0.134295182 | -0.260106541 | 0.029492064 | 0.863647806 | 0.999071534 | Rps23-ps      | Gm9701        |          | 0.350900168 | 0.237160178 | 1.077123525 | 1.387642131 | 0.719428178 | 0.582097292 | 0.517722348 | 1.312566595 | 0.471411931 | 0.326794823 |
| ENSMUSG00000035441 | -0.087187181 | 2.318296974  | 0.029480273 | 0.863674799 | 0.999071534 | Myo1d         | Myo1d         | MYO1D    | 6.246022985 | 9.723567283 | 4.375814322 | 2.428373729 | 3.335530641 | 8.731459383 | 5.75966112  | 1.865226215 | 1.335667137 | 6.339819557 |
| ENSMUSG00000085918 | -0.11378533  | 0.256706168  | 0.029456984 | 0.863728129 | 0.999071534 | Gm13032       | Gm13032       |          | 1.614140771 | 1.067220799 | 0.471241542 | 1.526406344 | 1.046440986 | 0.727621615 | 1.359021163 | 0.414494714 | 1.257098482 | 1.045743432 |
| ENSMUSG00000020107 | -0.041549053 | 6.419389074  | 0.029446527 | 0.863752084 | 0.999071534 | Anapc16       | Anapc16       | ANAPC16  | 127.0258607 | 83.36180244 | 66.71433836 | 85.20122684 | 88.75127609 | 76.54579392 | 116.8111047 | 80.6883044  | 59.16219729 | 73.4634761  |
| ENSMUSG00000075502 | 0.117822671  | 0.490996087  | 0.029310228 | 0.864064699 | 0.999071534 | Zbtbd6        | Kbtbd6        | KBTBD7   | 1.824680872 | 0.474320355 | 0.673202203 | 1.942698983 | 1.373453794 | 1.382481069 | 2.912188207 | 1.174401691 | 0.235705965 | 0.849666539 |
| ENSMUSG00000046432 | -0.044685438 | 7.705858941  | 0.029250458 | 0.864202022 | 0.999071534 | Ngfrap1       | Ngfrap1       | BEX3     | 206.9609189 | 172.8304794 | 263.0874211 | 226.8101063 | 228.25494   | 165.1701067 | 230.645306  | 218.9222916 | 148.8090328 | 221.8936845 |
| ENSMUSG00000027673 | -0.044063078 | 6.979903193  | 0.029231089 | 0.864246554 | 0.999071534 | Ndufb5        | Ndufb5        | NDUFB5   | 180.4328662 | 99.0736642  | 132.9574352 | 141.5394974 | 109.6800958 | 110.7440098 | 168.906916  | 97.33717542 | 99.31078004 | 120.5219305 |
| ENSMUSG00000009112 | -0.046119499 | 4.600721917  | 0.029195103 | 0.864329331 | 0.999071534 | Bc12l13       | Bc12l13       | BCL2L13  | 34.59875654 | 29.94147243 | 21.60979073 | 18.87193298 | 22.89089656 | 39.50985371 | 27.56871502 | 20.58657081 | 14.14235792 | 16.79725388 |
| ENSMUSG00000084998 | -0.106873764 | 0.843110995  | 0.029173368 | 0.864379354 | 0.999071534 | Gm16279       | Gm16279       |          | 1.122880537 | 0.5336104   | 3.837252559 | 1.526406344 | 1.896674286 | 2.764962138 | 0.841298815 | 2.417885834 | 0.942823861 | 0.980384468 |
| ENSMUSG00000022568 | 0.036916414  | 5.967471155  | 0.029169732 | 0.864387722 | 0.999071534 | Scrb          | Scrb          | SCRIB    | 68.14481257 | 55.96980192 | 75.19668612 | 57.30962001 | 63.63669243 | 96.70091266 | 50.34849833 | 48.97945875 | 48.86970347 | 66.73150276 |
| ENSMUSG00000062040 | -0.072998015 | 2.044498668  | 0.029143432 | 0.864448281 | 0.999071534 | Zfp27         | Zfp27         | ZNF585A  | 3.649361744 | 6.04758453  | 2.423527932 | 4.162926393 | 4.970594681 | 3.565345915 | 4.400639957 | 3.246875263 | 4.085570065 | 3.202589261 |
| ENSMUSG00000022364 | 0.040868328  | 4.537082798  | 0.029138563 | 0.864459495 | 0.999071534 | Tbc1d31       | Tbc1d31       | TBC1D31  | 23.8612114  | 23.41956754 | 23.76403778 | 21.85536356 | 25.31079134 | 31.94258891 | 17.79670571 | 19.34308667 | 22.70634132 | 21.69917622 |
| ENSMUSG00000037762 | -0.107456432 | 1.597098304  | 0.029132345 | 0.864473818 | 0.999071534 | Slc16a9       | Slc16a9       | SLC16A9  | 4.631882214 | 2.905212176 | 2.221567271 | 1.665170557 | 4.251166504 | 5.529924276 | 3.494625848 | 1.243484143 | 0.078586655 | 4.052255799 |
| ENSMUSG00000050856 | 0.046771851  | 6.597832823  | 0.029123201 | 0.864494882 | 0.999071534 | Atp5k         | Atp5k         | ATP5I    | 149.2027513 | 65.33762894 | 92.90190407 | 110.040021  | 75.6053612  | 83.23991278 | 119.9174388 | 67.14814373 | 97.97511291 | 98.6920364  |
| ENSMUSG00000083179 | 0.043094204  | 5.401068855  | 0.029114206 | 0.864515608 | 0.999071534 | Gm12693       | Gm12693       |          | 55.4422265  | 35.75189678 | 36.75684031 | 52.38349044 | 34.27094228 | 41.83824288 | 50.93093597 | 25.90591965 | 41.87709317 | 43.92122415 |
| ENSMUSG00000040128 | 0.070776994  | 6.777524047  | 0.029099079 | 0.864550469 | 0.999071534 | Pnrc1         | Pnrc1         | PNRC1    | 68.91679294 | 148.1065309 | 117.4737845 | 110.2481673 | 109.2222779 | 46.05844824 | 37.79373139 | 246.2098603 | 83.04706844 | 111.5023934 |
| ENSMUSG00000038331 | -0.064359584 | 3.247453656  | 0.028968775 | 0.864851154 | 0.999071534 | Satb2         | Satb2         | SATB2    | 6.526743119 | 10.43504782 | 11.04051614 | 5.273040098 | 16.80845833 | 13.38823772 | 5.371369359 | 8.428059192 | 6.128355098 | 11.82997258 |
| ENSMUSG00000045348 | -0.066292549 | 3.729631414  | 0.028894252 | 0.865023433 | 0.999071534 | Nyap1         | Nyap1         | NYAP1    | 11.5095255  | 20.04003501 | 8.751628644 | 10.33793388 | 19.48996336 | 9.022508029 | 6.795105815 | 21.27739534 | 6.364061063 | 18.2351511  |
| ENSMUSG00000010307 | -0.049554705 | 4.603146023  | 0.028889665 | 0.865034045 | 0.999071534 | Tmem86a       | Tmem86a       | TMEM86A  | 23.36995117 | 22.35234674 | 28.34181276 | 21.57783514 | 32.30886543 | 31.61514026 | 37.08186316 | 21.69189005 | 14.92804447 | 11.69925465 |
| ENSMUSG00000031563 | 0.038591639  | 5.530845241  | 0.028836562 | 0.865156955 | 0.999071534 | Wwc2          | Wwc2          | WWC2     | 38.52883841 | 51.64162868 | 54.12545715 | 38.36830492 | 53.89171076 | 66.43185347 | 38.05259257 | 42.41662577 | 45.80552592 | 33.98666154 |
| ENSMUSG00000032839 | 0.061524117  | 3.273374891  | 0.028828063 | 0.865176637 | 0.999071534 | Trpc1         | Trpc1         | TRPC1    | 6.947823321 | 10.31646773 | 7.87646578  | 13.11321814 | 9.875786801 | 6.912405345 | 6.989251696 | 14.02373784 | 9.113963991 | 8.888819173 |
| ENSMUSG00000054203 | -0.107681005 | 1.934168044  | 0.028776065 | 0.865297122 | 0.999071534 | Ifi205        | Ifi205        | MNDA     | 3.509001677 | 5.039653775 | 5.789538949 | 2.150845303 | 3.400933203 | 3.783632399 | 4.853647011 | 3.315957715 | 0           | 5.816947841 |
| ENSMUSG00000058099 | -0.064990063 | 3.683748376  | 0.028719663 | 0.865427938 | 0.999071534 | Nfam1         | Nfam1         | NFAM1    | 23.08923104 | 11.6208487  | 7.80914556  | 11.72557601 | 13.60373281 | 22.48350791 | 19.22044216 | 5.802926001 | 6.599767028 | 8.692742279 |
| ENSMUSG00000033809 | 0.053951754  | 3.614141976  | 0.028718315 | 0.865431065 | 0.999071534 | Alg3          | Alg3          | ALG3     | 11.9306057  | 9.782857327 | 15.95489222 | 9.85225913  | 14.32316099 | 19.8640701  | 14.62565633 | 8.566224097 | 10.29249382 | 7.516280918 |
| ENSMUSG00000040720 | 0.035364417  | 5.313251152  | 0.028702753 | 0.865467182 | 0.999071534 | 1110037f02Rik | 1110037f02Rik | KIAA1429 | 36.56379748 | 50.04079748 | 37.49736273 | 35.59302066 | 43.88511883 | 54.86266979 | 39.34689844 | 36.40645241 | 27.02761735 | 39.67289145 |
| ENSMUSG00000097380 | 0.148104634  | -0.620570163 | 0.028680116 | 0.865519739 | 0.999071534 | Gm26816       | Gm26816       |          | 0.070180034 | 0.5336104   | 0.336601102 | 1.040731598 | 0.523220493 | 0.363810808 | 0.258861174 | 0.345412262 | 0.392843275 | 1.241820326 |
| ENSMUSG00000072423 | -0.128682039 | 1.072840014  | 0.028652995 | 0.865582733 | 0.999071534 | Psmb11        | Psmb11        | PSMB11   | 2.035220973 | 1.007930755 | 2.692808814 | 3.191576901 | 1.700466601 | 0.9459081   | 0.064715293 | 0.414494714 | 2.749902928 | 4.509768551 |

|                     |              |              |             |             |             |               |               |           |  |  |             |             |             |             |             |             |             |             |             |             |
|---------------------|--------------|--------------|-------------|-------------|-------------|---------------|---------------|-----------|--|--|-------------|-------------|-------------|-------------|-------------|-------------|-------------|-------------|-------------|-------------|
| ENSMUSG00000079499  | -0.087136023 | 1.651579318  | 0.028641774 | 0.865608807 | 0.999071534 | 6530402F18Rik | 6530402F18Rik |           |  |  | 3.509001677 | 4.387463286 | 2.962089695 | 0.763203172 | 4.643581873 | 4.947826984 | 3.559341141 | 2.279720929 | 1.414235792 | 2.418281687 |
| ENSMUSG000000036106 | -0.074731796 | 1.726527754  | 0.028641039 | 0.865610514 | 0.999071534 | Prr5          | Prr5          | PRR5      |  |  | 3.438821644 | 4.03172302  | 4.510454763 | 1.80393477  | 3.204725518 | 4.438491853 | 2.718042326 | 2.901463001 | 2.199922343 | 2.941153403 |
| ENSMUSG000000005362 | 0.053568344  | 4.421436262  | 0.028579641 | 0.865753269 | 0.999071534 | Crbn          | Crbn          | CRBN      |  |  | 21.9663505  | 33.43958505 | 11.10783636 | 24.70002993 | 17.07006858 | 21.10102684 | 34.04024437 | 20.79381817 | 13.59237733 | 15.88222837 |
| ENSMUSG000000093656 | -0.134250751 | -0.402632075 | 0.028571927 | 0.865771214 | 0.999071534 | Gm20628       | Gm20628       |           |  |  | 1.122880537 | 0.296450222 | 0.673202203 | 0.624438959 | 0.719428178 | 0.291048646 | 0.388291761 | 0.27632981  | 1.178529826 | 0.588230681 |
| ENSMUSG000000096793 | 0.24226808   | -0.216466695 | 0.028551098 | 0.865819686 | 0.999071534 | Gm3002        | Gm3002        |           |  |  | 2.526481208 | 0           | 0           | 0           | 0.981038424 | 0.800383777 | 1.035444696 | 0           | 0           | 2.091486864 |
| ENSMUSG000000035933 | 0.07121745   | 2.395391724  | 0.028538066 | 0.865850023 | 0.999071534 | Cog5          | Cog5          | COG5      |  |  | 5.263502516 | 8.004155995 | 2.423527932 | 5.481186417 | 4.774386997 | 6.112021568 | 7.895265804 | 3.661369977 | 3.457020824 | 4.575127515 |
| ENSMUSG000000038256 | -0.051414566 | 4.257960597  | 0.028503303 | 0.865930981 | 0.999071534 | Bcl9          | Bcl9          | BCL9      |  |  | 14.03600671 | 23.77530781 | 19.25358302 | 20.74524986 | 22.43307863 | 24.66637276 | 8.218842272 | 21.13923043 | 13.1209654  | 24.1174579  |
| ENSMUSG000000030612 | 0.058178507  | 4.002591667  | 0.028493627 | 0.865953522 | 0.999071534 | Mrlp46        | Mrlp46        | MIRPL46   |  |  | 22.10671057 | 18.67636399 | 11.5790779  | 11.72557601 | 17.26627626 | 19.93683226 | 30.15732676 | 0.049801264 | 10.52819978 | 10.06528053 |
| ENSMUSG000000008730 | -0.046502372 | 7.172435218  | 0.028487256 | 0.865968368 | 0.999071534 | Hipk1         | Hipk1         | HIPK1     |  |  | 110.2528327 | 146.7428599 | 165.2711409 | 165.8232347 | 170.0466601 | 144.6511771 | 75.19917102 | 169.7355855 | 134.4309689 | 152.5478232 |
| ENSMUSG000000063870 | 0.046025042  | 7.739543446  | 0.028290508 | 0.866427654 | 0.999071534 | Chd4          | Chd4          | CHD4      |  |  | 178.6081854 | 230.6382727 | 242.9586752 | 202.9426617 | 235.9724422 | 284.8638624 | 117.2641118 | 203.1714925 | 218.4208612 | 222.2858383 |
| ENSMUSG000000029916 | 0.057504945  | 3.279008254  | 0.028251403 | 0.866519134 | 0.999071534 | Agk           | Agk           | AGK       |  |  | 10.38664496 | 11.91729893 | 7.87646578  | 7.146356975 | 11.64165596 | 15.86215121 | 12.16647517 | 8.220811835 | 4.399844685 | 8.365947457 |
| ENSMUSG000000003518 | -0.037524707 | 5.539335222  | 0.028224579 | 0.866581924 | 0.999071534 | Dusp3         | Dusp3         | DUSP3     |  |  | 49.54710368 | 56.44412228 | 48.47055865 | 42.60061342 | 47.22064947 | 55.15371843 | 50.73679009 | 56.37128115 | 23.17775325 | 39.73825042 |
| ENSMUSG000000006931 | -0.045586803 | 5.0563485    | 0.028194482 | 0.866652411 | 0.999071534 | Lepre4        | P3h4          | P3H4      |  |  | 38.94991862 | 40.3172302  | 30.29409915 | 27.26716787 | 38.71831646 | 42.42034017 | 54.87856887 | 23.97161098 | 16.02800564 | 24.57497065 |
| ENSMUSG000000007207 | 0.062600119  | 2.971637172  | 0.028183811 | 0.866677411 | 0.999071534 | Stx1a         | Stx1a         | STX1A     |  |  | 8.561964092 | 7.233385418 | 9.89607239  | 6.521918016 | 6.998074091 | 7.712789121 | 5.047792891 | 10.0169556  | 4.00700141  | 11.56853672 |
| ENSMUSG000000046791 | 0.066506895  | 3.052836025  | 0.028144103 | 0.866770484 | 0.999071534 | 2410016O06Rik | 2410016O06Rik | C14orf169 |  |  | 10.80772517 | 7.292675462 | 9.222870187 | 5.550568524 | 8.763943254 | 17.60844309 | 10.35444696 | 4.352194501 | 5.421237202 | 4.64048648  |
| ENSMUSG000000048920 | 0.060978604  | 3.398639293  | 0.028134991 | 0.866791852 | 0.999071534 | Fkrp          | Fkrp          | FKRP      |  |  | 10.8779052  | 11.56155866 | 8.011106221 | 9.713494917 | 12.88430463 | 17.17187012 | 16.63183042 | 8.842553906 | 4.00700141  | 6.928050238 |
| ENSMUSG000000026249 | 0.094521803  | 3.924320621  | 0.028066472 | 0.866952642 | 0.999071534 | Serpine2      | Serpine2      | SERPINE2  |  |  | 21.68563036 | 10.61291795 | 26.86076792 | 4.717983245 | 12.29568158 | 32.59744836 | 31.58106322 | 5.733843549 | 1.414235792 | 9.86920364  |
| ENSMUSG000000023908 | 0.05262295   | 3.980590779  | 0.027972225 | 0.867174138 | 0.999071534 | Pkmyt1        | Pkmyt1        | PKMYT1    |  |  | 20.70310989 | 9.189956883 | 19.05162236 | 16.72108768 | 13.99614818 | 25.03018356 | 14.8845175  | 8.773471454 | 15.00661312 | 14.44433116 |
| ENSMUSG000000024122 | 0.041499972  | 5.273114498  | 0.02796253  | 0.867196946 | 0.999071534 | Pdpk1         | Pdpk1         | PDPK1     |  |  | 40.42369932 | 58.51927383 | 22.68691426 | 32.95650061 | 43.36189834 | 50.13312929 | 37.47015492 | 40.75864691 | 31.27032473 | 30.65335435 |
| ENSMUSG000000033361 | -0.116041948 | 1.063419896  | 0.027926117 | 0.867282639 | 0.999071534 | Prrg3         | Prrg3         | PRRG3     |  |  | 2.526481208 | 3.438822576 | 1.548365068 | 1.595788451 | 1.504258917 | 2.255627007 | 1.48845175  | 0           | 2.907040239 | 2.222204793 |
| ENSMUSG000000005583 | -0.049401693 | 3.807343517  | 0.027902397 | 0.867338491 | 0.999071534 | Mef2c         | Mef2c         | MEF2C     |  |  | 12.91312617 | 13.28096995 | 17.57057751 | 14.91715291 | 14.38856355 | 22.19245926 | 8.671849326 | 11.12227484 | 12.49241616 | 12.41820326 |
| ENSMUSG000000037260 | 0.041578187  | 5.02969304   | 0.027874401 | 0.867404446 | 0.999071534 | Hgsnat        | Hgsnat        | HGSNAT    |  |  | 44.28360116 | 41.9180614  | 20.39802676 | 26.64272891 | 34.07473459 | 45.54911311 | 38.63503021 | 28.94554755 | 20.19214436 | 29.67296989 |
| ENSMUSG000000062604 | -0.03808437  | 5.81885124   | 0.027806261 | 0.867565113 | 0.999071534 | Srpk2         | Srpk2         | SRPK2     |  |  | 48.42422314 | 61.89880636 | 58.09735015 | 56.47703473 | 71.41959726 | 50.06036713 | 44.32997603 | 75.23079066 | 46.66978113 | 49.01922338 |
| ENSMUSG000000038604 | -0.042863547 | 4.889334437  | 0.027718474 | 0.867772405 | 0.999071534 | Fam65a        | Fam65a        | FAM65A    |  |  | 28.84399379 | 38.716399   | 28.54377342 | 21.64721724 | 38.52210878 | 36.38108076 | 17.99085159 | 37.30452429 | 18.77790857 | 31.63373882 |
| ENSMUSG000000007721 | -0.038579444 | 5.681344727  | 0.027661505 | 0.867907109 | 0.999071534 | Ccdc124       | Ccdc124       | CCDC124   |  |  | 54.88078623 | 38.30136869 | 59.71303544 | 56.47703473 | 59.58173361 | 67.66881022 | 58.69677119 | 30.94893867 | 34.17736497 | 57.18909394 |
| ENSMUSG000000028015 | 0.07219458   | 3.512329207  | 0.027656177 | 0.867919713 | 0.999071534 | Ctso          | Ctso          | CTSO      |  |  | 18.80824899 | 14.76322106 | 6.193460271 | 8.325852786 | 9.352566308 | 12.73337827 | 24.07408917 | 4.006782239 | 8.01400282  | 7.712357812 |
| ENSMUSG000000092428 | -0.12527442  | 2.791610862  | 0.027583962 | 0.868090688 | 0.999071534 | Gm20545       | Gm20545       |           |  |  | 11.9306057  | 4.446753331 | 0.471241542 | 9.574730704 | 10.33360473 | 6.621356699 | 9.513148141 | 8.013564478 | 0           | 8.365947457 |
| ENSMUSG000000040433 | 0.036356978  | 5.444014135  | 0.027488006 | 0.868318224 | 0.999071534 | Zbtb38        | Zbtb38        | ZBTB38    |  |  | 49.54710368 | 56.56270236 | 36.01631788 | 44.19640187 | 36.102214   | 63.30308052 | 40.77063489 | 37.64993655 | 34.33450228 | 39.60753249 |
| ENSMUSG000000047084 | -0.045724282 | 4.533838064  | 0.027453856 | 0.868399301 | 0.999071534 | Ngrn          | Ngrn          | NGRN      |  |  | 30.66867466 | 26.44335981 | 16.69541464 | 25.74076153 | 23.6757273  | 33.32506998 | 29.44545853 | 12.50392388 | 15.55659371 | 22.87563758 |
| ENSMUSG000000034612 | -0.040124604 | 5.91175471   | 0.027446335 | 0.868417164 | 0.999071534 | Chst11        | Chst11        | CHST11    |  |  | 65.75869143 | 89.88370732 | 56.68362553 | 41.21297129 | 64.48692573 | 79.16523174 | 61.09123704 | 73.22739954 | 37.00583655 | 40.65327592 |
| ENSMUSG000000046836 | -0.039584501 | 5.621179725  | 0.02743796  | 0.868437058 | 0.999071534 | Brox          | Brox          | BROX      |  |  | 69.47823321 | 66.28626965 | 59.31696934 | 38.02139439 | 46.37041617 | 61.12021568 | 59.02034765 | 49.60120082 | 34.02022766 | 33.00627707 |
| ENSMUSG000000097779 | 0.149663919  | -0.210260823 | 0.027310343 | 0.86874059  | 0.999071534 | 4833407H14Rik | 4833407H14Rik |           |  |  | 0.421080201 | 0.592900444 | 0.201960661 | 0.971349492 | 1.373453794 | 0.582097292 | 1.812028217 | 1.174401691 | 0           | 0.196076894 |
| ENSMUSG000000085379 | -0.080410225 | 1.763793913  | 0.027286802 | 0.868796661 | 0.999071534 | 2310058D17Rik | 2310058D17Rik |           |  |  | 4.842422314 | 4.03172302  | 2.221567271 | 2.081463196 | 4.381971627 | 2.182864846 | 3.688771728 | 1.796143762 | 4.242707375 | 2.875794438 |
| ENSMUSG000000054342 | 0.046486055  | 5.769215599  | 0.027206528 | 0.868988049 | 0.999071534 | Kcnn4         | Kcnn4         | KCNN4     |  |  | 80.63685854 | 52.23452912 | 48.87447997 | 48.35932826 | 48.59410327 | 94.51804782 | 79.21151922 | 26.66582662 | 32.68456052 | 44.57481379 |
| ENSMUSG000000024231 | 0.042719541  | 5.343188777  | 0.027118512 | 0.869198227 | 0.999071534 | Cul2          | Cul2          | CUL2      |  |  | 46.66972231 | 51.9380789  | 33.72743039 | 27.82222473 | 48.13628533 | 50.93351307 | 64.32700172 | 32.26150527 | 24.98483232 | 29.54225196 |
| ENSMUSG000000008892 | -0.041776048 | 7.825757509  | 0.027097681 | 0.869248022 | 0.999071534 | Vdac3         | Vdac3         | VDAC3     |  |  | 263.8769261 | 211.1318481 | 236.5632543 | 222.5777978 | 261.4794413 | 297.0879055 | 283.5177007 | 164.8998139 | 145.3520119 | 210.1944298 |
| ENSMUSG000000029192 | -0.044012517 | 4.932957158  | 0.02707251  | 0.869308218 | 0.999071534 | Tbc1d14       | Tbc1d14       | TBC1D14   |  |  | 45.33630167 | 39.96148993 | 21.60979073 | 22.96547727 | 31.45863213 | 45.62187527 | 38.76446079 | 22.17546722 | 18.07079067 | 24.3135348  |
| ENSMUSG000000029314 | -0.05633552  | 4.219357775  | 0.027071264 | 0.869311198 | 0.999071534 | Agpat9        | Agpat9        | GPAT3     |  |  | 17.89590855 | 30.94940318 | 14.8777687  | 15.61097397 | 18.83593774 | 8.222124252 | 18.57328923 | 27.97839322 | 13.35667137 | 17.32012559 |
| ENSMUSG000000098713 | 0.103048706  | 0.461670394  | 0.027064524 | 0.869327322 | 0.999071534 | RP24-225O12.5 | Rps2-ps5      |           |  |  | 1.543960738 | 1.363671021 | 0.740522424 | 0.901967385 | 1.700466601 | 2.619437815 | 1.68259763  | 0.828989429 | 0.942823861 | 0.392153787 |

|                      |              |              |              |             |             |              |              |               |             |             |             |             |             |             |             |             |             |             |
|----------------------|--------------|--------------|--------------|-------------|-------------|--------------|--------------|---------------|-------------|-------------|-------------|-------------|-------------|-------------|-------------|-------------|-------------|-------------|
| ENSMUSG00000001525   | -0.041245293 | 10.20606927  | 0.027015946  | 0.869443593 | 0.999071534 | Tubb5        | Tubb5        | TUBB          | 1174.322501 | 1103.862047 | 1382.690006 | 1067.374327 | 1503.604891 | 1539.501813 | 1089.999688 | 1125.284067 | 868.2622075 | 1071.037351 |
| ENSMUSG000000026748  | 0.087850887  | 1.126680997  | 0.026995809  | 0.869491823 | 0.999071534 | Pkdc2        | Pkdc2        | PLXD2         | 1.824680872 | 2.075151554 | 3.837252559 | 1.457024238 | 1.111843547 | 3.128772945 | 2.718042326 | 1.036236786 | 1.571373102 | 1.960768935 |
| ENSMUSG000000031246  | 0.044152299  | 9.205126914  | 0.026978533  | 0.869533214 | 0.999071534 | Sh3bgrl      | Sh3bgrl      | SH3BGR        | 535.2631158 | 631.498263  | 595.78395   | 688.3398791 | 555.0715403 | 513.7008603 | 716.5924447 | 595.0762449 | 566.2442973 | 456.728444  |
| ENSMUSG000000085438  | 0.032163116  | 5.593590443  | 0.02697254   | 0.869547576 | 0.999071534 | 170002014Rik | 170002014Rik |               | 46.4591822  | 50.3372477  | 53.58689539 | 47.17983245 | 49.57514169 | 54.06228601 | 53.97255476 | 45.52533613 | 37.87009176 | 44.50945483 |
| ENSMUSG000000024293  | 0.045465405  | 4.390806724  | 0.026966403  | 0.869562284 | 0.999071534 | Esco1        | Esco1        | ESCO1         | 24.42265167 | 25.13897883 | 15.14704958 | 21.71659935 | 20.14398897 | 24.66637276 | 32.35764674 | 18.7213446  | 10.76390575 | 17.77763835 |
| ENSMUSG000000039955  | 0.063166607  | 7.816385523  | 0.026944926  | 0.869613773 | 0.999071534 | Fam162a      | Fam162a      | FAM162A       | 173.2043228 | 293.6635899 | 220.271761  | 241.3803487 | 212.8199354 | 65.9952805  | 163.7944078 | 391.83567   | 197.6001676 | 248.9522958 |
| ENSMUSG000000060036  | -0.04412492  | 10.00246354  | 0.026892035  | 0.869740661 | 0.999071534 | Rpl3         | Rpl3         | RPL3          | 1280.715432 | 1080.798219 | 974.4601894 | 1116.288712 | 949.5143893 | 988.2556778 | 1448.781275 | 823.2555852 | 696.3539901 | 942.0187554 |
| ENSMUSG000000035545  | 0.039645525  | 5.731836216  | 0.026883132  | 0.869762032 | 0.999071534 | Leng8        | Leng8        | LENG8         | 55.58258657 | 43.99321295 | 62.94440602 | 44.5433124  | 65.07554879 | 58.06420489 | 32.09878557 | 69.91144182 | 37.71295445 | 62.4178111  |
| ENSMUSG000000002028  | 0.056954117  | 5.669184375  | 0.026847373  | 0.869847906 | 0.999071534 | Kmt2a        | Kmt2a        | KMT2A         | 30.59849462 | 40.49510033 | 72.77315819 | 61.19501798 | 51.6026211  | 44.74872934 | 15.14337867 | 63.62493865 | 58.6122167  | 60.78383699 |
| ENSMUSG000000038013  | -0.052247118 | 4.766002096  | 0.026842352  | 0.869859969 | 0.999071534 | Wpfl2        | Wpfl2        | WIPF2         | 16.28176778 | 27.09555029 | 36.62219987 | 27.89160683 | 34.99037045 | 25.32132321 | 11.77818341 | 40.06782239 | 19.87786974 | 30.52263642 |
| ENSMUSG000000026436  | -0.050761657 | 5.655214962  | 0.026834184  | 0.869879594 | 0.999071534 | Elk4         | Elk4         | ELK4          | 38.52883841 | 32.3130742  | 77.88949494 | 63.97030224 | 51.07940061 | 50.56970226 | 20.51474803 | 57.82201265 | 44.46985879 | 62.87532385 |
| ENSMUSG000000030061  | -0.038846451 | 6.445030468  | 0.026828279  | 0.869893784 | 0.999071534 | Uba3         | Uba3         | UBA3          | 101.0592483 | 94.15259052 | 69.60910783 | 105.5995662 | 86.26597875 | 102.2308369 | 121.9883282 | 62.51961942 | 59.63360922 | 73.39811714 |
| ENSMUSG000000028825  | 0.133532476  | -0.370584888 | 0.026819968  | 0.86991376  | 0.999071534 | Rhd          | Rhd          | RHD           | 0.140360067 | 0.177870133 | 0.605881983 | 1.526406344 | 0.654025616 | 1.091432423 | 0.841298815 | 0.552659619 | 0.392843275 | 0.457512752 |
| ENSMUSG000000022952  | -0.047759605 | 5.838208787  | 0.026775457  | 0.87002079  | 0.999071534 | Runx1        | Runx1        | RUNX1         | 46.81008237 | 75.47622653 | 59.03983324 | 54.048661   | 66.12198977 | 50.8607509  | 29.769035   | 101.8275348 | 37.63438579 | 49.28065924 |
| ENSMUSG000000030930  | -0.065128743 | 2.137074615  | 0.026759992  | 0.870057999 | 0.999071534 | Chst15       | Chst15       | CHST15        | 5.824942784 | 4.565333419 | 4.510454763 | 3.260959008 | 4.578179312 | 6.184783729 | 2.9769035   | 3.385040167 | 3.771295445 | 4.052255799 |
| ENSMUSG000000007458  | -0.044392751 | 7.587131841  | 0.0267373095 | 0.870113108 | 0.999071534 | M6pr         | M6pr         | M6PR          | 242.1912958 | 227.4366103 | 187.6214541 | 161.3827798 | 197.9081514 | 236.4042628 | 288.6949242 | 145.3494798 | 116.5173155 | 144.3125936 |
| ENSMUSG000000082691  | -0.239349591 | 1.821602837  | 0.026736758  | 0.870113921 | 0.999071534 | Dynlt1-ps1   | Dynlt1-ps1   |               | 4.35116208  | 4.150303108 | 0           | 0           | 10.98763035 | 3.492583753 | 12.29590576 | 0           | 0           | 0           |
| ENSMUSG0000000020472 | -0.0447458   | 4.797138954  | 0.026726365  | 0.870138943 | 0.999071534 | Zkscan17     | Zkscan17     | ZNF496        | 21.61545033 | 43.22244237 | 30.02481827 | 15.95788451 | 36.03681144 | 29.90524839 | 20.3883245  | 29.22187736 | 20.19214436 | 31.82981571 |
| ENSMUSG000000004996  | 0.04970501   | 4.0921467    | 0.026685404  | 0.870237611 | 0.999071534 | Mri1         | Mri1         | MRI1          | 18.17662869 | 8.774926572 | 20.06142566 | 23.58991623 | 15.10799173 | 21.173789   | 17.21426807 | 11.605852   | 15.71373102 | 17.64692042 |
| ENSMUSG000000042705  | 0.03837848   | 4.796537326  | 0.026648039  | 0.870327686 | 0.999071534 | Commmd10     | Commmd10     | COMMD10       | 27.58075318 | 25.67258923 | 22.14835249 | 33.16464693 | 32.83208592 | 30.63287    | 34.29910554 | 25.69867229 | 18.46363395 | 27.45076509 |
| ENSMUSG000000033060  | -0.041610076 | 4.813403498  | 0.026639448  | 0.870348404 | 0.999071534 | Lmo7         | Lmo7         | LMO7          | 25.40517214 | 32.8466846  | 26.45684659 | 24.42250151 | 38.71831646 | 47.80474012 | 23.03864448 | 20.72473572 | 24.51342039 | 20.13056107 |
| ENSMUSG000000033306  | 0.054624987  | 7.456259448  | 0.026595279  | 0.870454981 | 0.999071534 | Lpp          | Lpp          | LPP           | 100.7083481 | 192.1590339 | 216.9730702 | 170.7493642 | 212.2313124 | 161.6775229 | 70.73381577 | 248.144169  | 183.3006723 | 180.456101  |
| ENSMUSG000000031696  | 0.050026915  | 7.6444878251 | 0.026584291  | 0.870481509 | 0.999071534 | Vps35        | Vps35        | VPS35         | 261.7013451 | 271.6669835 | 132.7554745 | 162.6316578 | 196.4038925 | 226.7268953 | 342.2144719 | 176.0220887 | 113.1388633 | 140.9792864 |
| ENSMUSG000000021070  | -0.158208552 | 1.536373476  | 0.026555918  | 0.870550034 | 0.999071534 | Bdkrb2       | Bdkrb2       | BDKRB2        | 5.123142449 | 8.063446039 | 0           | 0.763203172 | 1.308051232 | 5.311637791 | 5.436084652 | 2.141556024 | 0           | 0.653589645 |
| ENSMUSG000000029822  | 0.036571475  | 4.950342211  | 0.026552309  | 0.870558753 | 0.999071534 | Osbpl3       | Osbpl3       | OSBPL3        | 36.70415754 | 27.56987065 | 31.30390246 | 27.89160683 | 34.66335765 | 48.75064822 | 25.95083269 | 25.69867229 | 26.08479349 | 26.79717545 |
| ENSMUSG0000000022559 | -0.040061932 | 4.976474789  | 0.026537944  | 0.870593463 | 0.999071534 | Fbxl6        | Fbxl6        | GS1-393G12.13 | 35.93217717 | 25.96903945 | 41.80585683 | 32.19329744 | 28.90793223 | 31.86982675 | 23.62108212 | 27.08032134 | 22.62777267 | 44.44409586 |
| ENSMUSG000000071203  | 0.063373008  | 2.752552733  | 0.026506546  | 0.870669365 | 0.999071534 | Naip5        | Naip5        | NAIP          | 11.22880537 | 4.03172302  | 5.250977187 | 6.938210655 | 6.14784079  | 8.076599929 | 5.436084652 | 5.872008453 | 4.242707375 | 9.411690889 |
| ENSMUSG000000000001  | 0.041032023  | 7.510789977  | 0.026492525  | 0.870703273 | 0.999071534 | Gnai3        | Gnai3        | GNAI3         | 186.8192493 | 227.6737705 | 152.9515406 | 168.1822263 | 198.8891898 | 215.9580954 | 245.206247  | 166.5577927 | 130.1096928 | 143.8550809 |
| ENSMUSG000000041415  | -0.041289837 | 4.652662675  | 0.026481718  | 0.870729415 | 0.999071534 | Dicer1       | Dicer1       | DICER1        | 28.21237348 | 24.30891821 | 30.22677893 | 23.65929833 | 25.44159646 | 41.69271855 | 15.79053161 | 18.7213446  | 19.40645781 | 26.53573959 |
| ENSMUSG000000087138  | 0.10030027   | 1.440316509  | 0.026481611  | 0.870729676 | 0.999071534 | Gm15545      | Gm15545      |               | 3.017741442 | 2.01586151  | 0.942483085 | 3.81601586  | 3.073920395 | 2.983248622 | 0.323576467 | 2.970545453 | 1.414235792 | 5.359435089 |
| ENSMUSG000000005656  | -0.037486593 | 6.879206653  | 0.02647186   | 0.870753268 | 0.999071534 | Snx6         | Snx6         | SNX6          | 119.0955169 | 139.9245048 | 113.03065   | 117.1169959 | 129.6932796 | 146.397469  | 144.8328268 | 105.7652346 | 62.85492408 | 112.9402907 |
| ENSMUSG000000016503  | -0.037923976 | 5.585786263  | 0.026413751  | 0.870893956 | 0.999071534 | Gtf3a        | Gtf3a        | GTF3A         | 56.21420687 | 44.34895322 | 48.47055865 | 43.71072713 | 59.90874642 | 51.4428482  | 71.12210753 | 37.09727694 | 26.63477408 | 45.42448033 |
| ENSMUSG000000028820  | -0.049813323 | 7.959141765  | 0.026391312  | 0.870948327 | 0.999071534 | Sfpq         | Sfpq         | SFPQ          | 242.1211157 | 163.6998126 | 352.4886737 | 261.0848669 | 292.0878401 | 388.768229  | 158.3583231 | 145.6948921 | 244.8199293 | 256.7953715 |
| ENSMUSG000000027009  | -0.063871032 | 3.128266602  | 0.026390232  | 0.870950944 | 0.999071534 | Itga4        | Itga4        | ITGA4         | 15.36942735 | 7.411255551 | 9.89607239  | 5.966861163 | 7.325086899 | 17.09910796 | 9.642578728 | 6.424668073 | 4.32127603  | 5.294076125 |
| ENSMUSG000000031168  | -0.038665852 | 6.657840329  | 0.026353667  | 0.871039593 | 0.999071534 | Ebp          | Ebp          | EBP           | 129.2716218 | 74.70545595 | 109.8665996 | 106.7096799 | 109.941706  | 103.4677937 | 135.4491093 | 80.41197459 | 64.58343449 | 100.7181643 |
| ENSMUSG000000098973  | -0.075995137 | 6.883977599  | 0.026347152  | 0.871055395 | 0.999071534 | mmu-mir-6236 | Mir6236      |               | 117.6919162 | 66.10839951 | 97.34503861 | 257.0607048 | 78.41767135 | 48.89617254 | 30.7397644  | 126.7663001 | 169.8654323 | 143.659004  |
| ENSMUSG000000030814  | -0.034954501 | 5.72575673   | 0.026338316  | 0.871076831 | 0.999071534 | Bcl7c        | Bcl7c        | BCL7C         | 58.74068807 | 43.93392291 | 59.71303544 | 61.75007483 | 52.4528544  | 62.50269675 | 48.53647011 | 36.89002958 | 44.54842744 | 60.3916832  |
| ENSMUSG000000020325  | 0.041439139  | 5.914390926  | 0.026331207  | 0.871094076 | 0.999071534 | Fstl3        | Fstl3        | FSTL3         | 52.98592532 | 92.84820954 | 48.67251931 | 36.14807751 | 79.66032002 | 60.82916703 | 72.61055928 | 69.15153485 | 40.69856334 | 52.54860746 |
| ENSMUSG000000032271  | 0.198753028  | -0.612547514 | 0.026317393  | 0.871127599 | 0.999071534 | Nnmt         | Nnmt         | NNMT          | 1.543960738 | 0.177870133 | 0.538561763 | 0           | 0.261610246 | 1.018670261 | 1.68259763  | 0.138164905 | 0           | 0           |

|                    |              |              |             |             |             |               |               |           |             |             |             |             |             |             |             |             |             |             |
|--------------------|--------------|--------------|-------------|-------------|-------------|---------------|---------------|-----------|-------------|-------------|-------------|-------------|-------------|-------------|-------------|-------------|-------------|-------------|
| ENSMUSG00000029012 | 0.040773286  | 4.357095956  | 0.026218016 | 0.871369025 | 0.999071534 | Orc5          | Orc5          | ORC5      | 23.2295911  | 21.46299608 | 18.64770103 | 19.56575405 | 21.4520402  | 23.86598898 | 28.34529854 | 14.64547991 | 13.35667137 | 20.84950968 |
| ENSMUSG00000030659 | 0.038192456  | 5.517501757  | 0.02618597  | 0.871446975 | 0.999071534 | Nucb2         | Nucb2         | NUCB2     | 33.6864161  | 45.83120433 | 46.92219358 | 47.6655072  | 59.71253874 | 39.07328074 | 42.32380194 | 54.8514672  | 31.97744262 | 54.24794054 |
| ENSMUSG00000025825 | -0.034131129 | 5.320477162  | 0.02617689  | 0.871469071 | 0.999071534 | Iscu          | Iscu          | ISCU      | 40.98513959 | 33.43958505 | 47.19147446 | 44.5433124  | 42.64247016 | 43.58453475 | 43.22981604 | 35.50838053 | 27.65616659 | 41.4375835  |
| ENSMUSG00000063236 | -0.04229245  | 5.112867488  | 0.026170505 | 0.871484612 | 0.999071534 | 1110038F14Rik | 1110038F14Rik | C8orf33   | 47.86278288 | 30.11934256 | 30.7653407  | 34.69105327 | 38.52210878 | 44.31215637 | 44.78298309 | 23.55711627 | 15.24231909 | 40.98007074 |
| ENSMUSG00000057329 | 0.046175796  | 4.423114353  | 0.02616453  | 0.871499156 | 0.999071534 | Bcl2          | Bcl2          | BCL2      | 15.86068758 | 25.13897883 | 28.00521166 | 18.24749402 | 21.64824789 | 24.9574214  | 12.16647517 | 17.33969555 | 24.51342039 | 24.3135348  |
| ENSMUSG00000084071 | 0.236602588  | -0.885928103 | 0.026145448 | 0.871545616 | 0.999071534 | Gm13378       | Gm13378       |           | 1.122880537 | 0.237160178 | 0           | 0           | 0.588623054 | 1.600767553 | 0           | 0.759906976 | 0           | 0           |
| ENSMUSG00000021248 | -0.040203922 | 7.776142545  | 0.026131814 | 0.871578822 | 0.999071534 | Tmed10        | Tmed10        | TMED10    | 221.2776458 | 244.5121431 | 214.1456209 | 213.7662703 | 260.9562208 | 247.1003005 | 256.2078469 | 224.0343931 | 124.4527497 | 206.7304047 |
| ENSMUSG00000038523 | 0.094043524  | 1.44356488   | 0.026094702 | 0.871669255 | 0.999071534 | 1700003F12Rik | 1700003F12Rik | C20orf144 | 1.333420637 | 1.660121243 | 5.587578288 | 2.22022741  | 2.158284533 | 1.964578361 | 0.841298815 | 5.043019025 | 2.357059653 | 2.418281687 |
| ENSMUSG00000055172 | -0.044048539 | 5.476304012  | 0.026077651 | 0.871710825 | 0.999071534 | C1ra          | C1ra          | C1R       | 35.51109697 | 67.70923071 | 39.44964912 | 41.90679236 | 49.64054425 | 35.58069698 | 28.86302089 | 60.99980546 | 29.54181432 | 54.64009433 |
| ENSMUSG00000074826 | 0.165974149  | -0.48220047  | 0.026021326 | 0.871848247 | 0.999071534 | Gm10767       | Gm10767       | FAM103A1  | 0.771980369 | 0.711480533 | 0           | 1.110113705 | 0.196207685 | 0.363810808 | 0.453007054 | 0.552659619 | 0           | 1.633974113 |
| ENSMUSG00000041997 | -0.037858876 | 5.150402258  | 0.026010738 | 0.871874096 | 0.999071534 | Ttk1          | Ttk1          | TLK1      | 35.79181711 | 38.716399   | 28.54377342 | 39.06212599 | 44.01592395 | 45.98568608 | 38.18202315 | 41.17314163 | 19.09218319 | 27.77755991 |
| ENSMUSG00000066952 | -0.088210928 | 0.973997681  | 0.025987976 | 0.871929686 | 0.999071534 | Myo1h         | Myo1h         | MYO1H     | 1.473780704 | 2.608761954 | 2.423527932 | 0.901967385 | 2.419894779 | 1.964578361 | 2.912188207 | 1.243484143 | 0.707117896 | 1.895409971 |
| ENSMUSG00000022437 | -0.045771711 | 6.764730186  | 0.02597852  | 0.871952787 | 0.999071534 | Samm50        | Samm50        | SAMM50    | 151.3081523 | 113.1846948 | 98.9607239  | 99.77146922 | 111.1843547 | 171.7187012 | 163.8591231 | 56.64761096 | 58.45507939 | 85.29344868 |
| ENSMUSG00000018849 | -0.054892678 | 3.552739568  | 0.025966012 | 0.871983351 | 0.999071534 | Wwc1          | Wwc1          | WWC1      | 10.8779052  | 13.10309981 | 12.45424076 | 10.40731598 | 14.6501738  | 6.985167506 | 10.80745401 | 18.58317969 | 8.406846095 | 9.150255031 |
| ENSMUSG00000028873 | -0.04729463  | 5.081219443  | 0.025942858 | 0.872039947 | 0.999071534 | Cdca8         | Cdca8         | CDCA8     | 39.09027868 | 20.04003501 | 43.55618256 | 34.69105327 | 40.54958819 | 64.61279943 | 37.7290161  | 17.96143762 | 22.47063536 | 34.73889376 |
| ENSMUSG00000028179 | -0.092468915 | 0.845295397  | 0.025910024 | 0.87212025  | 0.999071534 | Cth           | Cth           | CTH       | 2.596661241 | 1.245090933 | 2.086926831 | 0.763203172 | 2.289089656 | 2.473913492 | 2.200319978 | 1.865226215 | 0.628549241 | 0.849666539 |
| ENSMUSG00000036112 | 0.044021218  | 8.270055626  | 0.025864157 | 0.872232516 | 0.999071534 | Metap2        | Metap2        | METAP2    | 277.0707724 | 243.2077622 | 376.5893126 | 342.4700779 | 333.6184667 | 367.7399643 | 239.1877247 | 239.9924396 | 278.8401569 | 387.9708133 |
| ENSMUSG00000024875 | -0.05878112  | 4.875136323  | 0.025780115 | 0.872438487 | 0.999071534 | Yif1a         | Yif1a         | YIF1A     | 41.96766006 | 42.03664148 | 23.76403778 | 19.0800793  | 29.03873735 | 35.3624105  | 60.31465352 | 22.58996193 | 11.23531768 | 12.94107497 |
| ENSMUSG00000056413 | -0.0890412   | 2.127023114  | 0.025777179 | 0.872445687 | 0.999071534 | Adap1         | Adap1         | ADAP1     | 6.73728322  | 5.929004441 | 2.692808814 | 4.717983245 | 2.550699902 | 11.78747017 | 3.882917609 | 0.759906976 | 2.199922343 | 2.875794438 |
| ENSMUSG00000048794 | -0.095989062 | 1.246344279  | 0.025760919 | 0.872485579 | 0.999071534 | Ccdc37        | Cfap100       | CFAP100   | 1.614140771 | 1.660121243 | 3.164050356 | 3.052812688 | 2.485297341 | 1.164194584 | 0.517722348 | 1.588896405 | 3.771295445 | 2.810435474 |
| ENSMUSG00000021962 | -0.038633874 | 4.473571825  | 0.025738969 | 0.872539452 | 0.999071534 | Dcp1a         | Dcp1a         | DCP1A     | 20.21184966 | 25.85045936 | 25.98560505 | 19.49637194 | 24.78757084 | 26.92199976 | 15.53167044 | 21.6228076  | 18.14935933 | 23.46386826 |
| ENSMUSG00000059742 | 0.178868963  | -0.748735897 | 0.025725847 | 0.872571668 | 0.999071534 | Kcnh7         | Kcnh7         | KCNH7     | 0.561440268 | 0.118580089 | 0.403921322 | 0.069382107 | 1.111843547 | 0.072762162 | 0.064715293 | 0.759906976 | 0           | 1.437897219 |
| ENSMUSG00000032336 | 0.041450151  | 7.549095215  | 0.025720276 | 0.872585349 | 0.999071534 | Nptn          | Nptn          | NPTN      | 146.46573   | 193.2262547 | 190.7855044 | 226.2550495 | 196.927113  | 172.8101336 | 240.4173153 | 191.7038054 | 143.0735209 | 165.684975  |
| ENSMUSG00000024426 | 0.056304862  | 3.496292298  | 0.02567399  | 0.872699071 | 0.999071534 | Atat1         | Atat1         | ATAT1     | 9.404124495 | 9.723567283 | 9.222870187 | 9.921641237 | 18.70513262 | 9.313556675 | 8.218842272 | 17.68510781 | 7.85686551  | 11.37245982 |
| ENSMUSG00000028556 | 0.040181021  | 7.377579945  | 0.02563869  | 0.872785869 | 0.999071534 | Dock7         | Dock7         | DOCK7     | 146.6060901 | 176.9214925 | 142.7861873 | 159.8563735 | 225.9658503 | 171.645939  | 132.4074905 | 172.9133783 | 132.4667525 | 202.6781489 |
| ENSMUSG00000025386 | 0.117326232  | -0.058007745 | 0.025577517 | 0.872936433 | 0.999071534 | Pde6g         | Pde6g         | PDE6G     | 0.421080201 | 0.415030311 | 0.740522424 | 1.595788451 | 0.915635862 | 0.436572969 | 0.453007054 | 1.036236786 | 0.942823861 | 1.176461361 |
| ENSMUSG00000081640 | -0.12429602  | -0.119303247 | 0.025543586 | 0.873020026 | 0.999071534 | Rplp0-ps1     | Rplp0-ps1     |           | 0.98252047  | 1.660121243 | 0.201960661 | 0.485674746 | 0.915635862 | 1.091432423 | 1.48845175  | 0.483577167 | 0.15713731  | 0.522871716 |
| ENSMUSG00000090137 | -0.042628778 | 9.434567212  | 0.025480365 | 0.87317593  | 0.999071534 | Uba52         | Uba52         |           | 627.4094999 | 649.8781767 | 726.9237393 | 885.6625901 | 738.1987127 | 549.136033  | 775.4186465 | 672.5176741 | 550.4519976 | 710.1251493 |
| ENSMUSG00000052928 | -0.064848045 | 4.165037134  | 0.025473578 | 0.873192681 | 0.999071534 | Ctlf          | Ctlf          | CTIF      | 22.87869093 | 37.58988815 | 10.29999371 | 6.383153803 | 18.50892493 | 27.94067002 | 19.99702569 | 16.51070612 | 5.421237202 | 18.0390742  |
| ENSMUSG00000030127 | 0.034599143  | 5.640233539  | 0.025454863 | 0.873238875 | 0.999071534 | Cops7a        | Cops7a        | COPS7A    | 54.8106062  | 55.25832139 | 48.20127776 | 40.79667865 | 57.03103371 | 63.66689133 | 63.80927937 | 36.54461732 | 30.56320683 | 53.33291504 |
| ENSMUSG00000002147 | -0.035894943 | 6.877835628  | 0.025370293 | 0.873447844 | 0.999071534 | Stat6         | Stat6         | STAT6     | 130.5348624 | 141.9996564 | 105.8273864 | 97.82877023 | 143.8202329 | 144.6511771 | 89.17767441 | 121.7232811 | 89.48969816 | 119.4761871 |
| ENSMUSG00000027408 | -0.059270125 | 4.927867091  | 0.025369262 | 0.873450396 | 0.999071534 | Cpxm1         | Cpxm1         | CPXM1     | 35.72163707 | 41.08800077 | 40.32481198 | 24.07559097 | 19.62076848 | 65.9952805  | 45.88314308 | 14.3691501  | 11.39245499 | 15.81686941 |
| ENSMUSG00000085840 | -0.112079394 | 1.138235717  | 0.025323338 | 0.873564025 | 0.999071534 | Gm11261       | Gm11261       |           | 3.158101509 | 2.371601776 | 2.221567271 | 0           | 3.597140888 | 2.182864846 | 1.747312924 | 2.970545453 | 1.885647722 | 0.71894861  |
| ENSMUSG00000026869 | 0.038937856  | 6.226347139  | 0.025256617 | 0.873729299 | 0.999071534 | Psmd5         | Psmd5         | PSMD5     | 99.86618773 | 78.08498848 | 61.26140051 | 58.83602635 | 86.78919924 | 112.2720152 | 101.9913025 | 63.48677375 | 41.95566182 | 57.25445291 |
| ENSMUSG00000021950 | -0.065551192 | 5.614334093  | 0.025251224 | 0.873742668 | 0.999071534 | Anxa8         | Anxa8         | ANXA8     | 36.98487768 | 108.4414912 | 59.03983324 | 26.01828996 | 30.21598346 | 28.81381596 | 49.96020657 | 90.08351792 | 15.08518178 | 46.79701859 |
| ENSMUSG00000004043 | -0.048857713 | 3.574901842  | 0.025242025 | 0.873765475 | 0.999071534 | Stat5a        | Stat5a        | STAT5A    | 12.70258607 | 15.8897319  | 10.70391503 | 8.533999106 | 14.71557636 | 13.67928637 | 8.477703446 | 10.91502748 | 8.092571475 | 15.29399769 |
| ENSMUSG00000024169 | -0.052498915 | 3.377739356  | 0.02520724  | 0.873851756 | 0.999071534 | Ift140        | Ift140        | IFT140    | 11.2989854  | 10.25717768 | 8.818948865 | 12.28063286 | 11.51085084 | 16.58977283 | 9.189571674 | 7.806317121 | 4.635550651 | 12.35284429 |
| ENSMUSG00000035352 | 0.058630265  | 5.156747576  | 0.025171984 | 0.873939266 | 0.999071534 | Ccl12         | Ccl12         | CCL8      | 33.0547958  | 20.1586151  | 38.57448626 | 56.68518105 | 30.28138602 | 52.3887563  | 60.5735147  | 10.91502748 | 17.6779474  | 39.99968628 |
| ENSMUSG00000042271 | -0.047376464 | 4.336531914  | 0.025104332 | 0.874107366 | 0.999071534 | Nxt2          | Nxt2          | NXT2      | 24.91391191 | 22.70808701 | 19.1862628  | 16.23541293 | 23.34871449 | 21.90141062 | 35.52869612 | 16.09621141 | 10.21392516 | 13.33322876 |

|                     |              |              |             |             |             |               |               |               |             |             |             |             |             |             |             |             |             |             |
|---------------------|--------------|--------------|-------------|-------------|-------------|---------------|---------------|---------------|-------------|-------------|-------------|-------------|-------------|-------------|-------------|-------------|-------------|-------------|
| ENSMUSG00000029249  | 0.038213297  | 5.719589193  | 0.025089211 | 0.87414497  | 0.999071534 | Rest          | Rest          | REST          | 35.93217717 | 50.51511783 | 59.44375456 | 59.04417267 | 63.50588731 | 52.60704278 | 37.53487022 | 60.37806339 | 54.44807798 | 48.10419788 |
| ENSMUSG00000058624  | -0.039412485 | 4.980123556  | 0.025058145 | 0.874222261 | 0.999071534 | Gda           | Gda           | GDA           | 43.44144076 | 34.26964567 | 36.35291898 | 25.67137942 | 26.16102464 | 43.8755834  | 34.81682789 | 35.16296827 | 19.01361453 | 20.13056107 |
| ENSMUSG00000028878  | 0.035764077  | 5.323475562  | 0.02505392  | 0.874229113 | 0.999071534 | Fam76a        | Fam76a        | FAM76A        | 37.82703808 | 47.01700521 | 37.56468295 | 37.53571964 | 44.86615725 | 36.96317805 | 35.07568907 | 51.88092175 | 35.67016941 | 33.136995   |
| ENSMUSG00000024539  | -0.032670289 | 5.656097861  | 0.025015657 | 0.874328054 | 0.999071534 | Ptpn2         | Ptpn2         | PTPN2         | 66.951752   | 52.29381917 | 54.79865936 | 45.86157243 | 44.60454701 | 54.71714546 | 51.70751949 | 51.12101477 | 33.31310976 | 51.11071024 |
| ENSMUSG00000034210  | 0.03459771   | 5.108499656  | 0.025003883 | 0.874357387 | 0.999071534 | Efcab14       | Efcab14       | EFCAB14       | 31.44065503 | 37.05627775 | 35.54507634 | 34.55228906 | 37.60647292 | 48.0230266  | 37.98787727 | 25.14601267 | 30.01322625 | 28.62722645 |
| ENSMUSG00000030868  | -0.032839234 | 5.611953009  | 0.024964719 | 0.874455007 | 0.999071534 | Dctn5         | Dctn5         | DCTN5         | 56.2843869  | 53.83536032 | 40.72873331 | 41.62926393 | 64.74853598 | 60.3198319  | 42.12965606 | 44.21276953 | 35.74873807 | 52.87540228 |
| ENSMUSG00000097503  | 0.176446018  | -0.240590098 | 0.024926352 | 0.874550715 | 0.999071534 | 3110045C21Rik | 3110045C21Rik |               | 0.631620302 | 0.118580089 | 0.605881983 | 1.318260024 | 0.915635862 | 0.218286485 | 0.129430587 | 0           | 2.828471584 | 0.065358965 |
| ENSMUSG00000005625  | -0.037422943 | 7.527501582  | 0.024892572 | 0.874635045 | 0.999071534 | Psmd4         | Psmd4         | PSMD4         | 200.5043558 | 179.5895445 | 224.3109742 | 183.7238181 | 181.0342905 | 206.0624414 | 194.7283181 | 150.8069936 | 149.2804447 | 180.3253831 |
| ENSMUSG00000019088  | -0.039766919 | 5.287386182  | 0.02486827  | 0.874695748 | 0.999071534 | Dnase1l1      | Dnase1l1      | DNASE1L1      | 49.19620351 | 39.42787953 | 35.27579546 | 33.65032168 | 48.13628533 | 31.28772945 | 47.75988659 | 51.39734458 | 20.11357571 | 35.22848187 |
| ENSMUSG00000028717  | -0.095490735 | 0.912689785  | 0.024858114 | 0.874721128 | 0.999071534 | Tal1          | Tal1          | TAL1          | 2.666841275 | 1.007930755 | 0.471241542 | 3.260959008 | 1.896674286 | 2.40115133  | 2.070889391 | 1.934308667 | 0.628549241 | 1.372538255 |
| ENSMUSG000000031770 | -0.033424334 | 5.238543614  | 0.024830325 | 0.874790594 | 0.999071534 | Herpud1       | Herpud1       | HERPUD1       | 32.98461576 | 47.07629526 | 35.0738348  | 38.36830492 | 44.08132652 | 40.23747532 | 33.84609849 | 38.20259617 | 29.69895163 | 37.64676355 |
| ENSMUSG000000040282 | -0.060235822 | 2.623343255  | 0.024759495 | 0.874967834 | 0.999071534 | BC052040      | BC052040      | C15orf41      | 4.421342113 | 5.395394041 | 7.472544458 | 7.215739081 | 7.325086899 | 6.69411886  | 3.494625848 | 7.115492597 | 5.814080477 | 5.163358196 |
| ENSMUSG00000045934  | 0.035242893  | 5.183268896  | 0.024746093 | 0.875001398 | 0.999071534 | Mtmr11        | Mtmr11        | MTMR11        | 41.96766006 | 44.05250299 | 32.24638554 | 31.08318373 | 36.75623962 | 35.07136185 | 28.34529854 | 38.61709089 | 34.96305152 | 37.71212252 |
| ENSMUSG000000032584 | 0.147886291  | 0.999689893  | 0.024741592 | 0.875012674 | 0.999071534 | Mst1r         | Mst1r         | MST1R         | 6.316203019 | 0.296450222 | 1.346404407 | 0.485674746 | 0.850233301 | 2.40115133  | 6.083237587 | 0.207247357 | 0           | 1.241820326 |
| ENSMUSG000000027035 | -0.033276882 | 5.109166658  | 0.024713741 | 0.875082463 | 0.999071534 | Cers6         | Cers6         | CERS6         | 34.38821644 | 39.30929944 | 35.67971678 | 34.76043538 | 36.42922681 | 48.16855093 | 36.88771728 | 27.4257336  | 25.22053829 | 29.34617506 |
| ENSMUSG000000033885 | 0.035104868  | 5.620463347  | 0.024713349 | 0.875083445 | 0.999071534 | Pxk           | Pxk           | PXK           | 40.00261912 | 62.84744707 | 43.62350278 | 47.80427141 | 57.42344908 | 44.23939421 | 44.13583015 | 55.05871456 | 46.82691844 | 45.94735205 |
| ENSMUSG000000040167 | 0.039113702  | 4.579282914  | 0.024645827 | 0.875252812 | 0.999071534 | Ikzf5         | Ikzf5         | IKZF5         | 23.08923104 | 18.20204363 | 24.63920065 | 29.83430582 | 25.44159646 | 26.33990247 | 24.00937388 | 25.90591965 | 21.13496822 | 18.56194592 |
| ENSMUSG000000044098 | 0.043528086  | 5.342688092  | 0.024620784 | 0.875315688 | 0.999071534 | Rsb1          | Rsb1          | RSBN1         | 29.05453389 | 49.62576717 | 46.78755314 | 42.3924671  | 38.39130366 | 32.59744836 | 25.69197151 | 63.14136149 | 37.00583655 | 35.81671255 |
| ENSMUSG00000020894  | -0.037711415 | 4.75152703   | 0.024617762 | 0.875323279 | 0.999071534 | Vamp2         | Vamp2         | RP11-599B13.6 | 33.6864161  | 33.97319545 | 26.05292527 | 23.45115201 | 24.19894779 | 38.78223209 | 24.65652682 | 25.9750021  | 14.29949523 | 27.64684199 |
| ENSMUSG000000049565 | -0.10938365  | 0.466429345  | 0.024595648 | 0.875378832 | 0.999071534 | Aknad1        | Aknad1        | AKNAD1        | 0.98252047  | 1.007930755 | 2.01960661  | 1.665170557 | 1.046440986 | 0.218286485 | 0.453007054 | 1.105319238 | 1.964216377 | 1.699333077 |
| ENSMUSG000000031105 | 0.061886816  | 3.971120951  | 0.024592593 | 0.875386506 | 0.999071534 | Slc25a14      | Slc25a14      | SLC25A14      | 26.38769261 | 17.13482283 | 8.280387102 | 14.22333184 | 13.27672    | 16.0804377  | 33.32837614 | 10.70778012 | 9.899650542 | 7.516280918 |
| ENSMUSG000000032750 | 0.07419958   | 2.417977023  | 0.024574405 | 0.875432221 | 0.999071534 | Gab3          | Gab3          | GAB3          | 6.73728322  | 2.96450222  | 7.270583797 | 5.966861163 | 3.335530641 | 4.80230266  | 2.329750565 | 3.315957715 | 8.17114013  | 6.209101628 |
| ENSMUSG000000031302 | 0.10376255   | 0.351128154  | 0.024510662 | 0.875592564 | 0.999071534 | Nlgn3         | Nlgn3         | NLGN3         | 1.614140771 | 0.474320355 | 1.144443746 | 1.665170557 | 0.784830739 | 0.873145938 | 0.841298815 | 1.796143762 | 0.392843275 | 1.830051006 |
| ENSMUSG000000022472 | -0.032374185 | 5.635380048  | 0.024468029 | 0.875699927 | 0.999071534 | Desl1         | Desl1         | DESI1         | 51.79286475 | 55.85122183 | 54.86597958 | 41.97617446 | 56.50781322 | 74.29016691 | 50.73679009 | 43.2456152  | 34.49163959 | 39.4114556  |
| ENSMUSG000000089889 | 0.114613901  | 0.508296867  | 0.02446033  | 0.875719325 | 0.999071534 | 0610040B10Rik | 0610040B10Rik |               | 0.350900168 | 1.48225111  | 1.88496617  | 1.387642131 | 1.24264867  | 1.528005392 | 1.941458804 | 1.381649048 | 0           | 1.830051006 |
| ENSMUSG000000044043 | 0.079939296  | 1.207821834  | 0.024457297 | 0.875726968 | 0.999071534 | Pcdhb14       | Pcdhb14       |               | 2.17558104  | 2.371601776 | 1.279084186 | 1.80393477  | 3.400933203 | 2.546675653 | 2.523896446 | 3.246875263 | 1.335667137 | 1.241820326 |
| ENSMUSG000000056941 | 0.03326269   | 5.644137114  | 0.024446087 | 0.875755219 | 0.999071534 | Comm7         | Comm7         | COMM7         | 50.17872398 | 47.96564593 | 45.30650829 | 56.40765262 | 55.72298248 | 54.06228601 | 64.78000877 | 48.35771668 | 30.87748145 | 48.10419788 |
| ENSMUSG000000041608 | 0.101837634  | 1.385211976  | 0.024419152 | 0.87582313  | 0.999071534 | Entpd3        | Entpd3        | ENTPD3        | 4.280982046 | 3.557402664 | 0.875162864 | 0.693821065 | 3.204725518 | 1.819054038 | 3.688771728 | 3.661369977 | 2.592765618 | 0.326794823 |
| ENSMUSG000000037089 | 0.042979913  | 6.173563649  | 0.02441622  | 0.875830524 | 0.999071534 | Slc35b2       | Slc35b2       | SLC35B2       | 92.70782431 | 71.62237364 | 63.07904646 | 70.56160236 | 70.96177933 | 68.25090751 | 133.637081  | 51.8118393  | 39.3628962  | 64.24786211 |
| ENSMUSG000000000134 | -0.034678858 | 6.127074586  | 0.024345287 | 0.876009562 | 0.999071534 | Tfe3          | Tfe3          | TFE3          | 75.51371609 | 81.93884137 | 74.32152326 | 60.84810744 | 74.68972534 | 87.7511668  | 44.13583015 | 72.39841011 | 66.15480759 | 61.96029835 |
| ENSMUSG000000031433 | -0.091953209 | 2.841166071  | 0.024313362 | 0.876090226 | 0.999071534 | Rbm41         | Rbm41         | RBM41         | 7.71980369  | 14.70393101 | 4.981696305 | 1.873316877 | 8.829345815 | 10.62327558 | 10.54859284 | 9.602460883 | 0.471411931 | 3.33330719  |
| ENSMUSG000000089993 | 0.072484879  | 1.870351698  | 0.024283953 | 0.876164585 | 0.999071534 | Gm5822        | Gm5822        |               | 4.631882214 | 0.491013064 | 2.154247051 | 2.428373729 | 4.643581873 | 3.492583753 | 6.342098761 | 2.210638477 | 2.199922343 | 3.33330719  |
| ENSMUSG000000074934 | -0.143854472 | 1.589687448  | 0.024157052 | 0.876485969 | 0.999071534 | Grem1         | Grem1         | GREM1         | 3.579181711 | 9.486407105 | 1.95228639  | 0           | 0.784830739 | 2.182864846 | 3.041618794 | 4.559441858 | 0           | 3.660102012 |
| ENSMUSG000000051504 | -0.071495102 | 1.77547556   | 0.024135928 | 0.87653955  | 0.999071534 | Siglech       | Siglech       |               | 3.930081878 | 3.913142931 | 2.490848153 | 3.81601586  | 3.335530641 | 2.40115133  | 2.459181152 | 2.072473572 | 3.614158135 | 4.575127515 |
| ENSMUSG000000081219 | 0.218999942  | -1.048431919 | 0.024078897 | 0.876684331 | 0.999071534 | Bambi-ps1     | Bambi-ps1     |               | 1.19306057  | 0.355740266 | 0           | 0           | 0.130805123 | 0.363810808 | 1.423736457 | 0.069082452 | 0           | 0           |
| ENSMUSG000000026991 | -0.037952498 | 5.259700209  | 0.024062641 | 0.876725632 | 0.999071534 | Pkp4          | Pkp4          | PKP4          | 42.66946039 | 31.30514345 | 44.63330609 | 41.3517355  | 40.61499075 | 60.61088055 | 35.01097377 | 20.1720761  | 31.11318742 | 39.15001974 |
| ENSMUSG000000035735 | -0.05198013  | 3.606952978  | 0.024011173 | 0.876856485 | 0.999071534 | Dagla         | Dagla         | DAGLA         | 13.26402634 | 17.07553279 | 13.59868451 | 4.926129565 | 15.43500454 | 16.51701067 | 8.671849326 | 11.81309936 | 10.21392516 | 10.45743432 |
| ENSMUSG000000014704 | 0.136989962  | -0.121897082 | 0.02400595  | 0.876869772 | 0.999071534 | Hoxa2         | Hoxa2         | HOXA2         | 0.421080201 | 0.059290044 | 1.683005509 | 0.971349492 | 0.719428178 | 0.727621615 | 0.129430587 | 1.865226215 | 0.235705965 | 1.045743432 |
| ENSMUSG000000024664 | -0.033935933 | 5.089466959  | 0.023943781 | 0.877028043 | 0.999071534 | Fads3         | Fads3         | FADS3         | 35.58127701 | 41.56232113 | 39.58428956 | 29.00172054 | 32.7012808  | 38.78223209 | 31.96935498 | 38.96250315 | 26.39906811 | 26.20894477 |

|                     |              |              |             |             |             |               |               |         |             |             |             |             |             |             |             |             |             |             |
|---------------------|--------------|--------------|-------------|-------------|-------------|---------------|---------------|---------|-------------|-------------|-------------|-------------|-------------|-------------|-------------|-------------|-------------|-------------|
| ENSMUSG00000054716  | -0.039917981 | 4.153874707  | 0.02393511  | 0.877050135 | 0.999071534 | Zfp771        | Zfp771        | ZNF771  | 19.86094949 | 17.66843323 | 20.59998742 | 18.38625824 | 16.41604296 | 21.173789   | 21.8090539  | 17.54694291 | 10.21392516 | 14.77112598 |
| ENSMUSG00000063696  | -0.042417461 | 7.995728746  | 0.023930255 | 0.877062506 | 0.999071534 | Gm8730        | Gm8730        |         | 213.7683822 | 278.3667585 | 285.7070151 | 330.813884  | 227.4047067 | 200.2414685 | 302.2204205 | 247.5915094 | 183.8506529 | 272.0240103 |
| ENSMUSG00000034432  | -0.033137166 | 5.771232031  | 0.023925594 | 0.877074383 | 0.999071534 | Cops8         | Cops8         | COPS8   | 78.32091743 | 54.78400103 | 51.49996856 | 48.22056405 | 54.21872356 | 76.18198311 | 50.41321362 | 42.96928539 | 36.22015    | 59.80345252 |
| ENSMUSG00000029097  | 0.083012329  | 1.802698119  | 0.023912073 | 0.877108847 | 0.999071534 | Trmt44        | Trmt44        | TRMT44  | 5.895122818 | 4.565333419 | 1.077123525 | 2.775284262 | 2.681505025 | 6.403070214 | 5.371369359 | 1.796143762 | 2.042785033 | 1.764692042 |
| ENSMUSG00000054792  | -0.047924411 | 3.519552306  | 0.023897245 | 0.877146653 | 0.999071534 | Klhl18        | Klhl18        | KLHL18  | 13.05348624 | 11.6208487  | 15.887572   | 7.978942253 | 11.51085084 | 13.31547556 | 8.865995207 | 10.56961522 | 7.6997282   | 13.92145944 |
| ENSMUSG00000084968  | -0.1370286   | -0.36117726  | 0.023866496 | 0.877225091 | 0.999071534 | Gm12743       | Gm12743       |         | 0.912340436 | 0.652190488 | 1.481044848 | 0           | 0.523220493 | 0.582097292 | 0.453007054 | 0.207247357 | 1.099961171 | 0.522871716 |
| ENSMUSG00000044330  | -0.049394378 | 5.313580836  | 0.023862124 | 0.877236247 | 0.999071534 | Gm9790        | Gm9790        |         | 39.72189898 | 57.62992316 | 39.92089066 | 37.81324807 | 34.27094228 | 14.47967014 | 41.22364195 | 59.61815642 | 28.28471584 | 39.47681456 |
| ENSMUSG00000041797  | -0.112390483 | 2.325154249  | 0.023855961 | 0.877251975 | 0.999071534 | Abca9         | Abca9         | ABCA9   | 7.088183388 | 9.01208675  | 1.683005509 | 3.052812688 | 5.624620297 | 13.89757285 | 6.859821109 | 1.657978857 | 0           | 2.810435474 |
| ENSMUSG00000015980  | -0.085191434 | 1.223354362  | 0.02379897  | 0.877397523 | 0.999071534 | Lrrc27        | Lrrc27        | LRRC27  | 2.666841275 | 3.794562842 | 2.086926831 | 0.971349492 | 2.354492217 | 1.382481069 | 1.876743511 | 1.796143762 | 3.457020824 | 1.30717929  |
| ENSMUSG00000037710  | -0.046418942 | 5.898687883  | 0.02378628  | 0.877429955 | 0.999071534 | Cisd1         | Cisd1         | CISD1   | 97.76078672 | 45.11972379 | 54.79865936 | 64.73350541 | 51.66802366 | 82.51229117 | 97.59066257 | 28.3280548  | 33.86309035 | 48.88850545 |
| ENSMUSG00000022125  | -0.052475969 | 4.741971779  | 0.023730577 | 0.877572423 | 0.999071534 | Cln5          | Cln5          | CLN5    | 30.52831459 | 46.66126495 | 15.34901024 | 16.929234   | 32.43967055 | 27.86790786 | 45.94785837 | 23.97161098 | 15.87086833 | 14.05217737 |
| ENSMUSG00000045551  | 0.07352701   | 1.931626987  | 0.023729191 | 0.877575972 | 0.999071534 | Fpr1          | Fpr1          | FPR1    | 3.087921476 | 3.201662398 | 2.558168373 | 5.342422204 | 4.316569065 | 2.182864846 | 4.27120937  | 4.697606763 | 1.492804447 | 5.555511983 |
| ENSMUSG00000022353  | 0.053627728  | 7.110776861  | 0.023678104 | 0.87770679  | 0.999071534 | Mtss1         | Mtss1         | MTSS1   | 81.33865887 | 162.3361416 | 158.0005571 | 156.2485039 | 142.8391945 | 94.59080998 | 57.07888885 | 230.735391  | 130.0311242 | 147.9726956 |
| ENSMUSG00000027611  | -0.039783798 | 4.877291534  | 0.023669993 | 0.877727571 | 0.999071534 | Procr         | Procr         | PROCR   | 23.8612114  | 35.45544656 | 37.09344141 | 25.67137942 | 32.04725518 | 22.77455656 | 28.7983056  | 40.75864691 | 18.62077126 | 27.58148302 |
| ENSMUSG00000001380  | -0.037812256 | 6.196126968  | 0.023666933 | 0.877735413 | 0.999071534 | Hars          | Hars          | HARS    | 96.35718605 | 83.53967257 | 55.20258068 | 79.85880464 | 70.04614347 | 112.1264909 | 86.97735444 | 43.31469765 | 48.24115423 | 68.16939998 |
| ENSMUSG00000053965  | -0.118671872 | 0.931922775  | 0.023666057 | 0.877737658 | 0.999071534 | Pde5a         | Pde5a         | PDE5A   | 1.333420637 | 1.363671021 | 3.90457278  | 1.387642131 | 1.63506404  | 3.274297269 | 1.229590576 | 0           | 3.142746204 | 0.522871716 |
| ENSMUSG00000087497  | 0.0555416    | 3.432484157  | 0.023662094 | 0.877747816 | 0.999071534 | 2810001G20Rik | 2810001G20Rik |         | 12.70258607 | 5.988294485 | 14.33920693 | 13.18260024 | 7.78290483  | 7.64002696  | 13.00777399 | 8.35897674  | 11.15674902 | 11.11102397 |
| ENSMUSG00000050947  | -0.063814225 | 2.004250089  | 0.023640737 | 0.877802565 | 0.999071534 | Amigo1        | Amigo1        | AMIGO1  | 4.280982046 | 3.735272798 | 3.433331237 | 3.330341114 | 5.886230544 | 5.820972922 | 3.429910554 | 4.006782239 | 2.042785033 | 3.529384083 |
| ENSMUSG00000034842  | -0.112325431 | -0.039107335 | 0.023581795 | 0.877953798 | 0.999071534 | Art3          | Art3          | ART3    | 0.421080201 | 1.007930755 | 0.740522424 | 1.942698983 | 0.327012808 | 1.45524323  | 0.517722348 | 0.621742072 | 0.628549241 | 0.784307574 |
| ENSMUSG00000028634  | 0.055519872  | 3.806099474  | 0.023568479 | 0.877987991 | 0.999071534 | Hivep3        | Hivep3        | HIVEP3  | 8.421604025 | 14.94109119 | 17.63789773 | 16.02726661 | 13.14591488 | 20.66445387 | 6.342098761 | 8.704389002 | 18.46363395 | 13.46394669 |
| ENSMUSG00000038975  | 0.036254652  | 6.906572024  | 0.023520248 | 0.878111924 | 0.999071534 | Rabggtb       | Rabggtb       | RABGGTB | 126.3942404 | 162.8104619 | 112.1554871 | 104.0731598 | 110.1379137 | 113.8727828 | 155.3814196 | 105.7652346 | 90.19681605 | 120.3912126 |
| ENSMUSG00000094627  | 0.044693232  | 7.457376423  | 0.023440687 | 0.878316641 | 0.999071534 | Gm10182       | Gm10182       |         | 197.9076946 | 84.42902324 | 238.5828609 | 205.093507  | 167.8229731 | 196.1667875 | 223.8502001 | 136.2996786 | 145.4305806 | 161.6327192 |
| ENSMUSG00000039725  | -0.050978791 | 3.380155187  | 0.023434846 | 0.878331687 | 0.999071534 | 2810408M09Rik | Trp53rka      | TP53RK  | 11.01826527 | 11.38368853 | 11.71371834 | 10.5460802  | 9.614176555 | 16.22596202 | 13.26663516 | 5.319348834 | 6.049786443 | 9.542408818 |
| ENSMUSG00000030922  | 0.075612909  | 1.582183708  | 0.023414045 | 0.878385274 | 0.999071534 | Lyrn1         | Lyrn1         | LYRM1   | 3.859901845 | 3.083082309 | 2.760129034 | 2.914048475 | 1.831271725 | 2.546675653 | 5.694495826 | 2.348803381 | 1.964216377 | 1.633974113 |
| ENSMUSG00000073158  | 0.175619437  | -0.926970817 | 0.023408195 | 0.878400351 | 0.999071534 | 9030624G23Rik | 9030624G23Rik | ZNF69   | 0.070180034 | 1.126510844 | 0.134640441 | 0.138764213 | 0.39241537  | 1.091432423 | 0.776583522 | 0.27632981  | 0           | 0           |
| ENSMUSG00000060181  | -0.036906461 | 4.729121555  | 0.023395805 | 0.878432285 | 0.999071534 | Slc35e3       | Slc35e3       | SLC35E3 | 26.94913288 | 29.58573216 | 24.63920065 | 25.74076153 | 32.04725518 | 31.65154026 | 18.96158099 | 33.57407186 | 16.26371161 | 26.86253441 |
| ENSMUSG00000028167  | -0.066898183 | 2.858472153  | 0.023393172 | 0.878439072 | 0.999071534 | Bdh2          | Bdh2          | BDH2    | 12.07096577 | 7.52983564  | 5.92417939  | 6.938210655 | 5.428412612 | 3.783632399 | 13.8490728  | 4.90485412  | 3.614158135 | 7.320204025 |
| ENSMUSG00000097428  | -0.105164948 | 0.55069719   | 0.023391021 | 0.878444619 | 0.999071534 | AW047730      | AW047730      |         | 1.052700503 | 1.007930755 | 0.807842644 | 2.22022741  | 2.027479409 | 0.291048646 | 0.647152935 | 1.657978857 | 0.707117896 | 2.745076509 |
| ENSMUSG00000005610  | -0.039273909 | 10.07089941  | 0.02338035  | 0.878472132 | 0.999071534 | Elf4g2        | Elf4g2        | EIF4G2  | 1077.544235 | 1282.977271 | 959.5151005 | 1153.824432 | 1183.459352 | 1381.316874 | 1297.023912 | 856.207915  | 775.6297631 | 886.7250714 |
| ENSMUSG00000006435  | -0.041022424 | 4.360862277  | 0.02333533  | 0.878592925 | 0.999071534 | Neurl1a       | Neurl1a       | NEURL1  | 21.40491023 | 22.47092683 | 22.28299293 | 18.45564034 | 23.02170168 | 17.17187012 | 12.29590576 | 21.48464269 | 19.48502646 | 25.03248341 |
| ENSMUSG000000027952 | 0.071731182  | 3.663872663  | 0.023283378 | 0.878722465 | 0.999071534 | Pmvk          | Pmvk          | PMVK    | 25.96661241 | 10.90936817 | 10.36731393 | 6.244389589 | 10.66061754 | 24.22979979 | 23.68579741 | 3.868617334 | 4.16413872  | 9.934562605 |
| ENSMUSG000000022394 | 0.057532673  | 3.562423802  | 0.02327609  | 0.878741299 | 0.999071534 | L3mbtl2       | L3mbtl2       | L3MBTL2 | 12.84294614 | 7.944865951 | 13.93528561 | 10.6154623  | 14.19235587 | 26.41266463 | 12.81362811 | 4.421276953 | 8.17114013  | 8.823460208 |
| ENSMUSG00000070284  | -0.058593533 | 4.132717472  | 0.023249066 | 0.878811169 | 0.999071534 | Gmppb         | Gmppb         | GMPPB   | 25.05427197 | 16.71979252 | 20.39802676 | 13.25198235 | 17.2008737  | 31.65154026 | 28.60415972 | 5.733843549 | 6.128355098 | 15.03256184 |
| ENSMUSG00000039745  | 0.036221536  | 6.248203078  | 0.023235359 | 0.878851331 | 0.999071534 | Htatip2       | Htatip2       | HTATIP2 | 88.42684226 | 83.12464226 | 61.53068139 | 74.44700033 | 82.01481224 | 67.45052373 | 115.9050906 | 63.21044394 | 57.51225553 | 66.01255415 |
| ENSMUSG00000034437  | 0.133396902  | 5.580837143  | 0.023221484 | 0.878882521 | 0.999071534 | Gm9761        | Gm9761        |         | 102.3926689 | 52.53097934 | 23.02351536 | 25.11632257 | 35.84060375 | 115.328026  | 133.2487893 | 5.664761096 | 0           | 10.84958811 |
| ENSMUSG00000048732  | -0.100644807 | 1.343995784  | 0.023219372 | 0.878887987 | 0.999071534 | Klhl11        | Klhl11        | KLHL11  | 4.491522147 | 3.913142931 | 1.279084186 | 1.457024238 | 1.831271725 | 6.839643183 | 3.106334087 | 1.4507315   | 0.392843275 | 0.522871716 |
| ENSMUSG00000055041  | -0.037423378 | 5.235484032  | 0.023203925 | 0.87892797  | 0.999071534 | Commnd5       | Commnd5       | COMMMD5 | 51.93322482 | 26.97697021 | 40.0555311  | 37.119427   | 41.59602918 | 30.85115649 | 45.88314308 | 27.90931077 | 32.21314859 | 40.19576317 |
| ENSMUSG00000039156  | 0.035329839  | 5.898318968  | 0.023169744 | 0.879016488 | 0.999071534 | Stim2         | Stim2         | STIM2   | 48.07332298 | 52.4716893  | 66.31041704 | 72.57368345 | 64.35612061 | 62.06612378 | 50.08963715 | 43.10745029 | 57.82653015 | 75.489604   |
| ENSMUSG00000020740  | 0.038299119  | 4.606369847  | 0.023165379 | 0.879027797 | 0.999071534 | Gga3          | Gga3          | GGA3    | 27.93165335 | 19.86216488 | 22.28299293 | 23.79806255 | 30.41219114 | 31.28772945 | 15.53167044 | 26.73490908 | 20.11357571 | 25.55535512 |

|                     |              |              |             |             |             |               |               |          |             |             |             |             |             |             |             |             |             |             |
|---------------------|--------------|--------------|-------------|-------------|-------------|---------------|---------------|----------|-------------|-------------|-------------|-------------|-------------|-------------|-------------|-------------|-------------|-------------|
| ENSMUSG00000042632  | 0.046757072  | 4.628041038  | 0.02316361  | 0.87903238  | 0.999071534 | Pla2g6        | Pla2g6        | PLA2G6   | 20.42238976 | 22.23376665 | 27.60129034 | 27.5446963  | 27.46907587 | 20.15511874 | 11.84289871 | 31.57068074 | 17.75651605 | 38.36571216 |
| ENSMUSG000000027185 | -0.050290507 | 4.360512632  | 0.023153182 | 0.879059403 | 0.999071534 | Nat10         | Nat10         | NAT10    | 28.21237348 | 21.40370603 | 23.69671756 | 14.63962448 | 20.40559922 | 43.29348611 | 23.36222095 | 8.35897674  | 11.94243557 | 15.35935666 |
| ENSMUSG000000042997 | -0.042082769 | 4.253993389  | 0.023142247 | 0.879087748 | 0.999071534 | Nhlrc3        | Nhlrc3        | NHLRC3   | 16.98356812 | 30.65295296 | 16.29149332 | 15.05591712 | 21.19042996 | 23.72046466 | 21.29133155 | 20.37932346 | 11.23531768 | 15.0979208  |
| ENSMUSG000000086150 | -0.091028768 | 0.864982679  | 0.023107734 | 0.879177249 | 0.999071534 | BC024582      | Bach2os       |          | 2.456301174 | 2.253021687 | 1.346404407 | 0.693821065 | 2.354492217 | 2.473913492 | 1.035444696 | 2.003391119 | 0.31427462  | 2.352922722 |
| ENSMUSG00000033629  | -0.041151113 | 5.214559792  | 0.023073083 | 0.879267177 | 0.999071534 | Ptplad1       | Hacd3         | HACD3    | 42.17820016 | 34.50680584 | 37.22808185 | 44.19640187 | 36.23301912 | 59.51944813 | 53.00182536 | 30.39627905 | 17.75651605 | 22.41812483 |
| ENSMUSG00000079575  | -0.135230199 | 2.707941887  | 0.023048339 | 0.879331437 | 0.999071534 | Rbpsuh-rs3    | Rbpsuh-rs3    |          | 8.351423991 | 23.12311732 | 0.134640441 | 0.971349492 | 2.616102464 | 19.71854577 | 8.607134033 | 1.105319238 | 2.671334273 | 0.457512752 |
| ENSMUSG00000028559  | 0.037715891  | 6.989824567  | 0.023046457 | 0.879336324 | 0.999071534 | Osbpl9        | Osbpl9        | OSBPL9   | 113.2705741 | 129.0151366 | 132.9574352 | 150.1428786 | 122.629803  | 98.15615589 | 120.1115847 | 156.5408371 | 113.0602947 | 122.2866226 |
| ENSMUSG00000007867  | -0.03617671  | 4.933622657  | 0.023015427 | 0.879416963 | 0.999071534 | Ift43         | Ift43         | IFT43    | 28.49309362 | 27.56987065 | 41.13265463 | 31.22194795 | 31.26242444 | 23.72046466 | 36.11113376 | 28.11655812 | 25.22053829 | 30.1958416  |
| ENSMUSG00000039427  | -0.040469633 | 4.563278887  | 0.023014388 | 0.879419664 | 0.999071534 | Alg1          | Alg1          | ALG1     | 33.475876   | 28.044191   | 19.859465   | 19.84328247 | 23.02170168 | 25.83056734 | 28.99245148 | 25.28417758 | 18.22792798 | 13.85610048 |
| ENSMUSG00000034218  | 0.081383735  | 2.460617106  | 0.022958547 | 0.879564919 | 0.999071534 | Atm           | Atm           | ATM      | 9.544484562 | 8.300606217 | 3.500651458 | 2.150845303 | 3.858751134 | 13.09718907 | 6.795105815 | 2.556050739 | 1.099961171 | 5.294076125 |
| ENSMUSG00000025006  | -0.11046514  | 1.673421104  | 0.022954593 | 0.879575213 | 0.999071534 | Sorbs1        | Sorbs1        | SORBS1   | 3.509001677 | 8.419186306 | 1.346404407 | 0.832585279 | 2.485297341 | 7.130691829 | 2.394465859 | 4.973936572 | 0.471411931 | 0.261435858 |
| ENSMUSG00000063875  | -0.109668783 | 0.134791885  | 0.022934059 | 0.879628677 | 0.999071534 | Rps6-ps1      | Rps6-ps1      |          | 0.491260235 | 1.363671021 | 1.88496617  | 0.346910533 | 1.111843547 | 0.363810808 | 1.359021163 | 1.312566595 | 0.392843275 | 0.980384468 |
| ENSMUSG00000029265  | 0.036120397  | 5.940223225  | 0.022930634 | 0.879637595 | 0.999071534 | Dr1           | Dr1           | DR1      | 59.79338858 | 56.2069621  | 52.71173253 | 58.90540846 | 87.24701717 | 76.69131824 | 87.17150032 | 55.54229172 | 33.23454111 | 53.398274   |
| ENSMUSG00000028333  | 0.040635713  | 8.341777413  | 0.022906442 | 0.879700622 | 0.999071534 | Anp32b        | Anp32b        | ANP32B   | 322.0561739 | 275.5801264 | 425.7330734 | 327.9692177 | 305.6261703 | 480.5940769 | 307.4623593 | 210.3560675 | 283.9471195 | 328.6248735 |
| ENSMUSG00000037108  | 0.086851959  | 0.990469186  | 0.022897111 | 0.879724938 | 0.999071534 | Zcwpw1        | Zcwpw1        | ZCWPW1   | 3.298461576 | 2.786632087 | 1.750325729 | 0.485674746 | 1.111843547 | 1.964578361 | 1.423736457 | 1.519813953 | 1.885647722 | 2.352922722 |
| ENSMUSG00000016559  | -0.038532603 | 9.791774493  | 0.022894659 | 0.879731331 | 0.999071534 | H3f3b         | H3f3b         | H3F3B    | 1027.856771 | 1016.112781 | 964.227516  | 799.628778  | 862.5289823 | 860.1215114 | 1029.814465 | 943.251805  | 608.9856457 | 788.2944709 |
| ENSMUSG00000090246  | -0.138907348 | -0.222260212 | 0.022865885 | 0.879806356 | 0.999071534 | Gm17017       | Gm17017       |          | 0.561440268 | 0.889350666 | 1.346404407 | 0.693821065 | 0.457817931 | 0.072762162 | 0           | 1.381649048 | 0.785686551 | 0.915025503 |
| ENSMUSG00000068823  | -0.039239442 | 8.970031464  | 0.022829906 | 0.879900236 | 0.999071534 | Csde1         | Csde1         | CSDE1    | 494.2077962 | 699.3853638 | 455.1520097 | 448.4165546 | 547.4194406 | 555.0297681 | 612.4008222 | 491.245319  | 355.6803016 | 389.9315822 |
| ENSMUSG00000026728  | 0.046719459  | 12.35064638  | 0.022803102 | 0.879970226 | 0.999071534 | Vim           | Vim           | VIM      | 4049.177395 | 5038.230814 | 5935.893108 | 5385.716639 | 6234.957002 | 3810.481637 | 2987.840385 | 6483.595405 | 5945.447269 | 5556.165573 |
| ENSMUSG00000078247  | 0.088458404  | 1.26403664   | 0.022771116 | 0.880053685 | 0.999071534 | Airn          | Airn          |          | 0.561440268 | 1.126510844 | 3.635291898 | 2.358991623 | 3.727946011 | 2.182864846 | 1.229590576 | 2.556050739 | 3.064177549 | 1.960768935 |
| ENSMUSG00000054418  | -0.124337579 | -0.421437201 | 0.022764552 | 0.880070958 | 0.999071534 | 2900041M22Rik | 2900041M22Rik |          | 0.421080201 | 0.237160178 | 1.548365068 | 0.346910533 | 0.784830739 | 1.091432423 | 0.19414588  | 0.621742072 | 0.707117896 | 0.261435858 |
| ENSMUSG00000039849  | -0.031203783 | 5.187611952  | 0.0227635   | 0.880073709 | 0.999071534 | Pcif1         | Pcif1         | PCIF1    | 40.35351929 | 41.32516095 | 35.81435722 | 31.01380163 | 42.64247016 | 44.23939421 | 30.67504911 | 37.23544184 | 28.36328449 | 34.05202051 |
| ENSMUSG00000006276  | 0.038711868  | 4.876686336  | 0.022752182 | 0.880103302 | 0.999071534 | Eps15l1       | Eps15l1       | EPS15L1  | 24.14193154 | 36.10763704 | 34.40063259 | 24.42250151 | 30.87000907 | 28.15895651 | 18.96158099 | 29.98178434 | 33.23454111 | 29.73832885 |
| ENSMUSG00000024259  | 0.034432884  | 5.093226878  | 0.022748286 | 0.88011349  | 0.999071534 | Slc25a46      | Slc25a46      | SLC25A46 | 36.00235721 | 38.53852886 | 37.22808185 | 27.19778577 | 36.03681144 | 40.23747532 | 42.25908664 | 30.67260886 | 17.99222202 | 38.16963527 |
| ENSMUSG00000020034  | 0.060503851  | 4.676021572  | 0.022695976 | 0.880250369 | 0.999071534 | Tcp11l2       | Tcp11l2       | TCP11L2  | 12.00078574 | 42.15522157 | 17.23397641 | 23.72868044 | 34.33634484 | 13.53376204 | 15.9199622  | 53.88431287 | 16.1065743  | 23.39850929 |
| ENSMUSG00000068922  | -0.034946718 | 5.196172443  | 0.022656446 | 0.880353914 | 0.999071534 | Msto1         | Msto1         | MSTO1    | 43.5116208  | 28.45922132 | 51.09604724 | 35.31549223 | 33.48611154 | 50.06036713 | 33.58723732 | 27.2875687  | 26.55620542 | 39.73825042 |
| ENSMUSG00000028798  | -0.046894759 | 7.342376124  | 0.022625641 | 0.880434667 | 0.999071534 | Eif3i         | Eif3i         | EIF3I    | 240.8578751 | 176.1507219 | 130.0626657 | 150.0041144 | 161.1519118 | 179.5042525 | 298.4022182 | 110.1174291 | 85.16842213 | 112.4827779 |
| ENSMUSG000000000278 | -0.044261236 | 7.957324077  | 0.02261171  | 0.880471204 | 0.999071534 | Scpep1        | Scpep1        | SCPEP1   | 217.0668437 | 340.443435  | 214.9534636 | 224.2429684 | 316.3521904 | 188.8178092 | 238.2817106 | 367.2423169 | 150.0661312 | 230.3249909 |
| ENSMUSG00000044674  | -0.048969346 | 3.75113745   | 0.022583814 | 0.880544405 | 0.999071534 | Fzd1          | Fzd1          | FZD1     | 14.87816711 | 19.50642461 | 14.94508892 | 12.41939707 | 8.633138131 | 20.37340523 | 15.98467749 | 14.02373784 | 6.992610304 | 7.908434705 |
| ENSMUSG00000030493  | 0.057326204  | 3.486366278  | 0.022476758 | 0.880825755 | 0.999071534 | C2300521Rik   | Faap24        | FAAP24   | 17.05374815 | 7.351965506 | 7.270583797 | 13.32136446 | 11.31464316 | 19.35473496 | 16.04939278 | 5.18118393  | 6.049786443 | 10.19599846 |
| ENSMUSG00000055447  | -0.041309397 | 7.640435508  | 0.022475758 | 0.880828386 | 0.999071534 | Cd47          | Cd47          | CD47     | 155.4487743 | 199.0959691 | 228.2828672 | 251.6489005 | 210.2692355 | 154.2557824 | 157.452309  | 232.876947  | 190.7646946 | 193.1357401 |
| ENSMUSG00000066607  | -0.052778012 | 3.489038652  | 0.022473117 | 0.880835336 | 0.999071534 | 6030419C18Rik | 6030419C18Rik | C1Sorf59 | 11.0884453  | 10.13859759 | 10.09803305 | 15.12529923 | 11.90326621 | 12.87890259 | 4.27120937  | 11.74401691 | 11.07818037 | 12.22212636 |
| ENSMUSG00000050914  | 0.071300444  | 4.865494507  | 0.022469574 | 0.880844658 | 0.999071534 | Ankrd37       | Ankrd37       | ANKRD37  | 23.72085134 | 42.39238175 | 24.43723998 | 24.70002993 | 32.04725518 | 3.856394561 | 16.8906916  | 66.4573192  | 24.6705577  | 24.90176548 |
| ENSMUSG00000042032  | -0.034607874 | 6.214690581  | 0.022464819 | 0.880857174 | 0.999071534 | Mat2b         | Mat2b         | MAT2B    | 77.408577   | 57.45205303 | 89.73785372 | 86.8663974  | 76.84800988 | 72.32558855 | 95.45505788 | 61.75971244 | 47.14119306 | 79.34578291 |
| ENSMUSG00000039130  | 0.035139628  | 4.630094373  | 0.022366293 | 0.881116782 | 0.999071534 | Zc3hc1        | Zc3hc1        | ZC3HC1   | 21.47509026 | 25.85045936 | 22.08103227 | 23.38176991 | 33.74772178 | 34.56202672 | 23.75051271 | 22.17546722 | 19.48502646 | 22.09133    |
| ENSMUSG00000073678  | -0.085674395 | 0.998911253  | 0.022343614 | 0.881176621 | 0.999071534 | Pgap1         | Pgap1         | PGAP1    | 1.473780704 | 2.608761954 | 1.548365068 | 2.567137942 | 1.700466601 | 3.565345915 | 2.588611739 | 0.967154334 | 1.414235792 | 0.522871716 |
| ENSMUSG00000024065  | -0.063440917 | 2.532284603  | 0.022340893 | 0.881183805 | 0.999071534 | Ehd3          | Ehd3          | EHD3     | 7.298723488 | 5.751134307 | 6.866662475 | 3.399723221 | 6.867268968 | 12.22404314 | 6.277383467 | 3.315957715 | 2.907040239 | 3.529384083 |
| ENSMUSG00000024561  | 0.039198433  | 4.154444647  | 0.022304656 | 0.881279488 | 0.999071534 | Mbd1          | Mbd1          | MBD1     | 20.63292986 | 18.73565403 | 18.71502126 | 12.76630761 | 20.07858641 | 26.41266463 | 14.62565633 | 14.30006765 | 16.81369219 | 15.22863873 |
| ENSMUSG00000022849  | 0.05757947   | 2.412194597  | 0.022267523 | 0.881377622 | 0.999071534 | Hspbp1        | Hspbp1        | HSPBAP1  | 4.421342113 | 6.46261484  | 7.135943356 | 3.954780073 | 4.447374189 | 6.403070214 | 4.141778783 | 4.075864691 | 5.106962581 | 5.816947841 |

|                     |              |              |             |             |             |               |               |          |  |  |  |             |             |             |             |             |             |             |             |             |             |
|---------------------|--------------|--------------|-------------|-------------|-------------|---------------|---------------|----------|--|--|--|-------------|-------------|-------------|-------------|-------------|-------------|-------------|-------------|-------------|-------------|
| ENSMUSG00000069743  | 0.061955678  | 2.184808033  | 0.022244392 | 0.881438791 | 0.999071534 | Zfp820        | Zfp820        |          |  |  |  | 2.807201342 | 3.794562842 | 6.058819831 | 4.717983245 | 4.970594681 | 4.147443207 | 5.694945826 | 5.526596192 | 2.671334273 | 3.790819941 |
| ENSMUSG00000002844  | -0.030636383 | 5.583417253  | 0.022234915 | 0.881463865 | 0.999071534 | Adprh         | Adprh         | ADPRH    |  |  |  | 47.44170267 | 53.18316983 | 50.9614068  | 37.74386596 | 62.59025145 | 52.09770765 | 46.14200425 | 51.19009722 | 34.09879631 | 46.01271101 |
| ENSMUSG000000066475 | 0.141030637  | 0.049349663  | 0.022233347 | 0.881468013 | 0.999071534 | Gm10268       | Gm10268       |          |  |  |  | 1.122880537 | 0.177870133 | 0           | 2.775284262 | 0.261610246 | 0.509335131 | 1.941458804 | 0.898071881 | 0.549980586 | 0.653589645 |
| ENSMUSG000000029625 | 0.037630373  | 4.580840528  | 0.022209547 | 0.881531003 | 0.999071534 | Cpsf4         | Cpsf4         | CPSF4    |  |  |  | 28.49309362 | 17.13482283 | 25.71632417 | 21.85536356 | 29.03873735 | 31.94258891 | 22.32677625 | 21.41556024 | 14.06378926 | 29.15009817 |
| ENSMUSG000000028266 | -0.043423801 | 6.366808061  | 0.02220741  | 0.881536662 | 0.999071534 | Lmo4          | Lmo4          | LMO4     |  |  |  | 75.37335602 | 56.50341232 | 120.9071157 | 100.6734366 | 78.35226879 | 73.78083178 | 42.38851723 | 92.08690904 | 94.43952343 | 78.6268343  |
| ENSMUSG000000027187 | 0.033120066  | 5.944223878  | 0.022111806 | 0.881790054 | 0.999071534 | Cat           | Cat           | CAT      |  |  |  | 50.24890402 | 62.37312672 | 58.63591192 | 65.35794437 | 78.41767135 | 62.06612378 | 48.47175482 | 61.41430018 | 62.30494349 | 61.82958042 |
| ENSMUSG000000081210 | 0.104509442  | -0.053986345 | 0.022068282 | 0.881905597 | 0.999071534 | Gm12933       | Gm12933       |          |  |  |  | 0.421080201 | 0.592900444 | 0.807842644 | 1.179495811 | 1.111843547 | 1.309718907 | 1.164875283 | 0.27632981  | 0.471411931 | 1.045743432 |
| ENSMUSG000000039236 | -0.050650835 | 5.432583715  | 0.022033545 | 0.881997895 | 0.999071534 | Isq20         | Isq20         | ISG20    |  |  |  | 31.51083506 | 62.55099685 | 43.96010388 | 44.68207662 | 44.47374189 | 18.62711335 | 22.45620684 | 70.74043125 | 38.34150369 | 46.86237755 |
| ENSMUSG000000038236 | -0.093708778 | 0.748108018  | 0.022020386 | 0.882032879 | 0.999071534 | Hoxa7         | Hoxa7         | HOXA7    |  |  |  | 1.263240604 | 0.948640711 | 3.567971678 | 0.693821065 | 1.831271725 | 2.182864846 | 1.747312924 | 0.483577167 | 0.785686551 | 2.222204793 |
| ENSMUSG000000032860 | -0.082029727 | 1.765594784  | 0.022012373 | 0.88205419  | 0.999071534 | P2ry2         | P2ry2         | P2RY2    |  |  |  | 2.456301174 | 6.581194929 | 4.173853661 | 1.595788451 | 2.681505025 | 6.475832375 | 3.753487022 | 3.730452429 | 1.257098482 | 0.915025503 |
| ENSMUSG000000027706 | 0.048931801  | 8.490394942  | 0.021981089 | 0.882137418 | 0.999071534 | Sec62         | Sec62         | SEC62    |  |  |  | 224.0848471 | 272.6749142 | 485.1095078 | 500.106224  | 335.7767512 | 253.2850843 | 247.7301434 | 380.2989004 | 401.1715529 | 427.9704996 |
| ENSMUSG000000045795 | 0.05334776   | 3.349405944  | 0.021973755 | 0.882156939 | 0.999071534 | Whamm         | Whamm         | WHAMM    |  |  |  | 10.94808523 | 11.50226861 | 10.50195437 | 8.880909638 | 9.483371431 | 9.822891806 | 4.530070544 | 16.92520084 | 8.406846095 | 9.28097296  |
| ENSMUSG000000066760 | -0.067295128 | 2.700228999  | 0.021971246 | 0.882163618 | 0.999071534 | Psg16         | Psg16         | CEACAM3  |  |  |  | 7.579443623 | 7.589125684 | 7.741825339 | 4.440454819 | 6.605658721 | 7.785551283 | 5.889091707 | 8.635306549 | 0.864255206 | 7.908434705 |
| ENSMUSG000000050295 | -0.053271904 | 4.984402445  | 0.021942525 | 0.882240098 | 0.999071534 | Foxc1         | Foxc1         | FOXC1    |  |  |  | 24.42265167 | 29.1114118  | 38.30520537 | 32.19329744 | 42.5770676  | 21.02826468 | 8.9307105   | 51.53550949 | 31.27032473 | 31.89517468 |
| ENSMUSG000000026627 | -0.042977692 | 3.998101607  | 0.021933126 | 0.882265138 | 0.999071534 | Tmem206       | Tmem206       | TMEM206  |  |  |  | 17.61518842 | 14.40748079 | 19.11894258 | 11.30928337 | 21.51744277 | 22.77455656 | 18.37914335 | 14.78364481 | 7.542590889 | 14.24825426 |
| ENSMUSG000000028845 | 0.131511102  | -0.210364839 | 0.021921229 | 0.88229684  | 0.999071534 | Tekt2         | Tekt2         | TEKT2    |  |  |  | 0.350900168 | 0.237160178 | 0.471241542 | 1.526406344 | 0.981038424 | 0.291048646 | 0.129430587 | 1.519813953 | 0.15713731  | 1.568615148 |
| ENSMUSG000000040410 | -0.043774214 | 3.833629254  | 0.021917233 | 0.882307491 | 0.999071534 | Fbxl4         | Fbxl4         | FBXL4    |  |  |  | 11.5095255  | 14.40748079 | 15.82025178 | 19.0800793  | 13.14591488 | 12.22404314 | 17.14955277 | 11.05319238 | 10.29249382 | 16.27438216 |
| ENSMUSG000000023021 | 0.049016666  | 6.334545352  | 0.021864344 | 0.882448548 | 0.999071534 | Cers5         | Cers5         | CERS5    |  |  |  | 115.7970553 | 101.5638461 | 53.25029429 | 65.91300122 | 76.65180219 | 128.2796908 | 148.0038762 | 42.34754332 | 33.31310976 | 61.43742663 |
| ENSMUSG000000037415 | -0.03682575  | 4.789588645  | 0.021848819 | 0.882489987 | 0.999071534 | Ranbp10       | Ranbp10       | RANBP10  |  |  |  | 28.49309362 | 33.67674522 | 27.87057122 | 25.81014364 | 29.10413991 | 44.96701582 | 21.93848449 | 28.25472303 | 13.1209654  | 27.90827784 |
| ENSMUSG000000097533 | 0.169385289  | -0.857984995 | 0.021836247 | 0.882523555 | 0.999071534 | Gm26590       | Gm26590       |          |  |  |  | 0.210540101 | 0           | 0.471241542 | 1.179495811 | 0.196207685 | 0.218286485 | 0.258861174 | 0           | 1.099961171 | 0.457512752 |
| ENSMUSG000000039349 | -0.084526635 | 2.026619968  | 0.02183249  | 0.882533588 | 0.999071534 | C130074G19Rik | C130074G19Rik | C1orf115 |  |  |  | 4.491522147 | 2.371601776 | 4.914376085 | 5.82809695  | 3.27012808  | 10.76879991 | 4.594785837 | 0.552659619 | 1.807079067 | 2.352922722 |
| ENSMUSG000000020513 | -0.086773505 | 1.736754507  | 0.021819453 | 0.882568409 | 0.999071534 | Tubd1         | Tubd1         | TUBD1    |  |  |  | 3.930081878 | 2.430891821 | 1.279084186 | 4.926129565 | 4.447374189 | 4.438491853 | 7.24811287  | 1.865226215 | 0.707117896 | 1.372538255 |
| ENSMUSG000000048164 | -0.102672615 | 1.476151587  | 0.021784255 | 0.88266248  | 0.999071534 | Gm7204        | Gm7204        |          |  |  |  | 2.877381375 | 3.201662398 | 4.712415424 | 1.248877918 | 2.223687094 | 2.40115133  | 5.371369359 | 3.730452429 | 0           | 1.176461361 |
| ENSMUSG000000001349 | -0.063640272 | 4.278910919  | 0.021753821 | 0.882743878 | 0.999071534 | Cnn1          | Cnn1          | CNN1     |  |  |  | 13.68510654 | 24.4274983  | 21.60979073 | 30.52812688 | 10.85682522 | 50.13312929 | 18.50857394 | 5.664761096 | 14.06378926 | 8.954178137 |
| ENSMUSG000000029657 | -0.046330602 | 7.034693122  | 0.021744017 | 0.882770112 | 0.999071534 | Hsph1         | Hsph1         | HSPH1    |  |  |  | 158.2559756 | 209.8274672 | 77.82217472 | 77.98548776 | 173.7092036 | 194.0566848 | 176.8668971 | 83.79701475 | 70.94749555 | 117.3847003 |
| ENSMUSG000000030303 | 0.087787449  | 0.407298704  | 0.021742303 | 0.882774701 | 0.999071534 | Far2          | Far2          | FAR2     |  |  |  | 0.842160403 | 0.948640711 | 1.009803305 | 1.248877918 | 1.962076848 | 0.800383777 | 1.229590576 | 1.519813953 | 1.099961171 | 1.176461361 |
| ENSMUSG000000038582 | 0.031823104  | 5.069203703  | 0.021617668 | 0.88310875  | 0.999071534 | Pptc7         | Pptc7         | PPTC7    |  |  |  | 36.07253724 | 30.712243   | 37.56468295 | 34.13599642 | 33.02829361 | 41.69271855 | 35.65812671 | 28.66921774 | 31.663168   | 25.68607305 |
| ENSMUSG000000097754 | 0.055954631  | 2.99429352   | 0.021597584 | 0.883162674 | 0.999071534 | Gm26687       | Ptgs2os2      |          |  |  |  | 11.7200656  | 4.98036373  | 8.347707322 | 7.63203172  | 7.259684337 | 7.64002696  | 11.907614   | 9.326131073 | 4.949825271 | 4.901922338 |
| ENSMUSG000000066278 | 0.03120397   | 5.575399469  | 0.021584917 | 0.883196696 | 0.999071534 | Vps37b        | Vps37b        | VPS37B   |  |  |  | 52.98592532 | 58.8750141  | 42.47905904 | 40.03347548 | 50.55618011 | 52.3887563  | 35.65812671 | 49.60120082 | 39.75573948 | 54.44401743 |
| ENSMUSG000000025815 | 0.054614416  | 2.827891621  | 0.021579421 | 0.883211459 | 0.999071534 | Dhtkd1        | Dhtkd1        | DHTKD1   |  |  |  | 6.877643287 | 7.707705773 | 6.395420932 | 7.701413827 | 6.736463844 | 7.785551283 | 5.824376413 | 4.766689215 | 4.399844685 | 11.89533154 |
| ENSMUSG000000081756 | -0.169198289 | 0.306394845  | 0.021545137 | 0.883303604 | 0.999071534 | Gm12291       | Gm12291       |          |  |  |  | 0.631620302 | 0           | 1.009803305 | 1.179495811 | 3.204725518 | 1.8918162   | 3.235764674 | 0.207247357 | 0           | 0           |
| ENSMUSG000000018986 | 0.099452246  | 1.718941728  | 0.021540922 | 0.883314938 | 0.999071534 | Slfm3         | Slfm3         | SLFM12L  |  |  |  | 3.930081878 | 7.292675462 | 2.288887492 | 0.901967385 | 1.504258917 | 9.168032352 | 5.306654065 | 1.036236786 | 0.942823861 | 0.784307574 |
| ENSMUSG000000054150 | -0.078905957 | 3.03079746   | 0.021500413 | 0.883423922 | 0.999071534 | Syne3         | Syne3         | SYNE3    |  |  |  | 8.140883891 | 17.37198301 | 6.866662475 | 6.591300122 | 3.924153696 | 20.37340523 | 12.36062105 | 2.832380548 | 2.907040239 | 2.483640651 |
| ENSMUSG000000014668 | 0.030332713  | 5.364471496  | 0.021464223 | 0.883521376 | 0.999071534 | Chfr          | Chfr          | CHFR     |  |  |  | 41.19567969 | 39.84290984 | 45.03722741 | 43.01690606 | 41.53062661 | 41.91100504 | 37.85844669 | 37.51177165 | 38.73434696 | 42.67940382 |
| ENSMUSG000000025068 | 0.030626408  | 6.333536886  | 0.021441631 | 0.883582253 | 0.999071534 | Gsto1         | Gsto1         | GSTO1    |  |  |  | 77.47875703 | 82.88748208 | 100.4417687 | 74.10008979 | 78.6792816  | 86.44144789 | 93.38416849 | 81.37912892 | 58.69078536 | 74.63993746 |
| ENSMUSG000000015806 | 0.034792413  | 5.507675404  | 0.021435041 | 0.883600018 | 0.999071534 | Qdpr          | Qdpr          | QDPR     |  |  |  | 55.58258657 | 39.72432975 | 45.17186785 | 42.53123131 | 50.03295962 | 54.06228601 | 57.46718061 | 25.49142493 | 44.07701551 | 40.52255799 |
| ENSMUSG000000020573 | 0.063584342  | 3.375687276  | 0.021342428 | 0.883849961 | 0.999071534 | Pik3cg        | Pik3cg        | PIK3CG   |  |  |  | 12.63240604 | 13.63671021 | 5.722218729 | 10.75422652 | 9.287163747 | 28.30448083 | 11.00159989 | 5.388431287 | 3.614158135 | 6.731973344 |
| ENSMUSG000000026600 | -0.036022249 | 6.945348721  | 0.021261314 | 0.88406933  | 0.999071534 | Soat1         | Soat1         | SOAT1    |  |  |  | 106.5332909 | 178.937354  | 126.5620142 | 104.4200704 | 132.178577  | 120.4941395 | 118.0406953 | 159.0968879 | 86.50408926 | 102.5482153 |
| ENSMUSG000000039879 | 0.0472882    | 4.514397321  | 0.021244891 | 0.884113795 | 0.999071534 | Heca          | Heca          | HECA     |  |  |  | 22.03653053 | 35.75189678 | 16.89737531 | 15.8885024  | 26.09562208 | 18.99092416 | 17.08483748 | 39.58424522 | 19.09218319 | 14.96720287 |

|                    |              |              |             |             |             |               |               |          |             |             |              |             |             |             |             |             |             |             |
|--------------------|--------------|--------------|-------------|-------------|-------------|---------------|---------------|----------|-------------|-------------|--------------|-------------|-------------|-------------|-------------|-------------|-------------|-------------|
| ENSMUSG00000039568 | 0.043201884  | 5.387604305  | 0.021242459 | 0.884120383 | 0.999071534 | Ubald1        | Ubald1        | UBALD1   | 29.47561409 | 53.42033001 | 49.48036195  | 33.44217536 | 48.00548021 | 34.70755105 | 22.06791508 | 69.49694711 | 31.58459935 | 44.18266001 |
| ENSMUSG00000030584 | 0.077661515  | 1.731735611  | 0.021240074 | 0.884126844 | 0.999071534 | Dpf1          | Dpf1          | DPF1     | 5.123142449 | 3.853852886 | 3.702612119  | 1.318260024 | 2.223687094 | 6.621356699 | 4.983077598 | 1.243484143 | 1.807079067 | 1.960768935 |
| ENSMUSG00000040385 | -0.052487063 | 8.419107906  | 0.021182989 | 0.88428156  | 0.999071534 | Ppp1ca        | Ppp1ca        | PPP1CA   | 532.6664546 | 430.9793328 | 224.4456146  | 256.1587374 | 377.2419753 | 477.2470174 | 632.7861396 | 216.0208286 | 133.4095764 | 226.2073762 |
| ENSMUSG00000021420 | -0.039813917 | 4.232288846  | 0.021166907 | 0.884325186 | 0.999071534 | Fars2         | Fars2         | FARS2    | 29.05453389 | 19.92145492 | 16.29149332  | 13.46012867 | 20.14398897 | 20.88274036 | 23.16807507 | 18.92859196 | 12.02100423 | 14.77112598 |
| ENSMUSG00000017740 | -0.118673371 | -0.005703537 | 0.021125972 | 0.884436307 | 0.999071534 | Slc12a5       | Slc12a5       | SLC12A5  | 2.315941107 | 0.355740266 | 1.144443746  | 0.069382107 | 0.850233301 | 0.363810808 | 1.423736457 | 0.759906976 | 0.471411931 | 0.915025503 |
| ENSMUSG00000028964 | -0.039778383 | 7.791264034  | 0.021099693 | 0.8845077   | 0.999071534 | Park7         | Park7         | PARK7    | 199.9429156 | 164.8263235 | 280.3213975  | 258.1014364 | 258.2747157 | 171.645939  | 205.4063415 | 209.3198308 | 194.8502646 | 256.5992946 |
| ENSMUSG00000089984 | -0.074949716 | 0.962610634  | 0.021094064 | 0.884522999 | 0.999071534 | Fbxo24        | Fbxo24        | FBXO24   | 2.105401006 | 1.126510844 | 2.221567271  | 1.873316877 | 2.354492217 | 2.328389169 | 0.970729402 | 1.72706131  | 1.649941757 | 1.895409971 |
| ENSMUSG00000083011 | -0.12805864  | -0.274782861 | 0.021072462 | 0.884581728 | 0.999071534 | Gm12816       | Gm12816       |          | 1.19306057  | 0.5336104   | 0.201960661  | 1.457024238 | 0.327012808 | 0.218286485 | 1.423736457 | 1.174401691 | 0.15713731  | 0.196076894 |
| ENSMUSG00000006050 | 0.033214885  | 6.211554198  | 0.021070341 | 0.884587497 | 0.999071534 | Sra1          | Sra1          | APBB3    | 65.6885114  | 82.29458164 | 84.15027543  | 75.14082139 | 71.81201263 | 56.02686437 | 72.73998987 | 86.69847775 | 57.98366746 | 83.46339767 |
| ENSMUSG00000000916 | -0.064610976 | 3.534403291  | 0.021057534 | 0.884622331 | 0.999071534 | Nsun5         | Nsun5         | NSUN5    | 20.14166963 | 15.29683146 | 8.684308424  | 5.064893778 | 12.29568158 | 21.90141062 | 19.28515746 | 5.388431287 | 4.085570065 | 6.666614379 |
| ENSMUSG00000050043 | 0.039252438  | 4.998971859  | 0.021011052 | 0.884748852 | 0.999071534 | Tmx2          | Tmx2          | TMX2     | 38.87973858 | 33.85461536 | 25.64900395  | 32.74835429 | 32.04725518 | 48.82341038 | 48.86004658 | 21.00106553 | 22.3492939  | 19.01945867 |
| ENSMUSG00000036948 | 0.033415919  | 4.931758789  | 0.021005747 | 0.884763301 | 0.999071534 | BC037034      | BC037034      | C7orf43  | 35.79181711 | 28.10348105 | 24.1679591   | 33.30341114 | 34.53255252 | 35.79898347 | 23.29750565 | 26.32041436 | 25.84908753 | 37.51604563 |
| ENSMUSG00000066415 | -0.031811478 | 5.291099116  | 0.020975419 | 0.884845941 | 0.999071534 | Msl2          | Msl2          | MSL2     | 40.42369932 | 45.47546406 | 37.90128405  | 42.87814185 | 37.86808316 | 60.46535622 | 33.84609849 | 40.06782239 | 26.79191139 | 29.67296989 |
| ENSMUSG00000060419 | -0.059233345 | 8.492927212  | 0.020951027 | 0.884912448 | 0.999071534 | Rps16-ps2     | Rps16-ps2     |          | 674.2195822 | 398.6662586 | 176.2443369  | 275.3775809 | 399.0864309 | 406.5949586 | 711.7387977 | 295.327484  | 93.9681115  | 254.3770899 |
| ENSMUSG00000045248 | -0.044453247 | 3.728282812  | 0.020950249 | 0.884914571 | 0.999071534 | Med26         | Med26         | MED26    | 13.19384631 | 12.33232924 | 16.2241731   | 11.6561939  | 15.89282247 | 17.24463228 | 9.254286968 | 18.65226215 | 6.678335683 | 11.82997258 |
| ENSMUSG00000007659 | -0.030268936 | 6.095020478  | 0.020894753 | 0.88506604  | 0.999071534 | Bcl2l1        | Bcl2l1        | BCL2L1   | 81.47901894 | 87.21565532 | 65.23329351  | 62.44389589 | 62.13243352 | 87.31459383 | 56.49645121 | 65.49016487 | 55.23376453 | 63.98642625 |
| ENSMUSG00000049287 | -0.063366524 | 1.639742429  | 0.020857836 | 0.885166911 | 0.999071534 | Iba57         | Iba57         | IBA57    | 3.36864161  | 3.201662398 | 2.894769475  | 2.428373729 | 3.989556257 | 4.147443207 | 2.523896446 | 2.072473572 | 2.671334273 | 2.810435474 |
| ENSMUSG00000039005 | -0.058862474 | 4.318671037  | 0.020849562 | 0.885189533 | 0.999071534 | Tlr4          | Tlr4          | TLR4     | 27.08949295 | 34.56609589 | 8.684308424  | 16.02726661 | 19.22835311 | 23.86598898 | 33.52252202 | 19.06675686 | 3.928432755 | 16.92797181 |
| ENSMUSG00000091900 | -0.122787664 | 1.731850001  | 0.020848106 | 0.885193515 | 0.999071534 | Gm4353        | Gm4353        | NUP35    | 10.8779052  | 1.48225111  | 1.144443746  | 0           | 4.120361381 | 7.348978314 | 4.918362304 | 0.414494714 | 1.257098482 | 1.895409971 |
| ENSMUSG00000038861 | 0.036502629  | 5.043312375  | 0.020846307 | 0.885198432 | 0.999071534 | Pl4kb         | Pl4kb         | PI4KB    | 41.26585972 | 47.31345544 | 23.42743668  | 26.92025734 | 30.08517833 | 42.34757801 | 42.19437135 | 21.69189005 | 25.3776756  | 31.04550814 |
| ENSMUSG00000033082 | 0.072408786  | 1.747944765  | 0.02082137  | 0.885266644 | 0.999071534 | Clec1a        | Clec1a        | CLEC1A   | 3.298461576 | 2.845922132 | 3.433331237  | 4.162926393 | 2.485297341 | 5.23887563  | 6.147952881 | 1.381649048 | 1.964216377 | 1.764692042 |
| ENSMUSG00000024118 | -0.051963925 | 3.452723186  | 0.020811486 | 0.88529369  | 0.999071534 | 1600002H07Rik | 1600002H07Rik | C16orf59 | 17.68536845 | 5.810424352 | 13.86796539  | 8.256470679 | 11.83786365 | 12.58785394 | 11.06631518 | 8.08264693  | 5.578374512 | 14.96720287 |
| ENSMUSG00000031924 | 0.03928369   | 6.440639052  | 0.020810683 | 0.885295886 | 0.999071534 | Cyb5b         | Cyb5b         | CYB5B    | 102.8137491 | 83.1839323  | 81.25550595  | 80.96891834 | 96.79579116 | 166.4798256 | 108.1392554 | 42.90020294 | 52.64099892 | 74.11706575 |
| ENSMUSG00000028085 | 0.052116763  | 3.289200998  | 0.020806248 | 0.885308026 | 0.999071534 | Pet112        | Gatb          | GATB     | 14.80798708 | 9.367827016 | 8.482347763  | 6.868828548 | 9.941189363 | 10.91432423 | 15.07866338 | 6.63191543  | 4.32127603  | 11.50317775 |
| ENSMUSG00000071454 | 0.038985321  | 4.277681422  | 0.020792471 | 0.885345741 | 0.999071534 | Dtnb          | Dtnb          | DTNB     | 22.45761073 | 19.03210425 | 21.74443117  | 17.83120138 | 17.59328907 | 16.95358363 | 13.65492692 | 18.44501479 | 22.15636074 | 20.78415071 |
| ENSMUSG00000038991 | -0.036864335 | 7.676743145  | 0.020737633 | 0.885495991 | 0.999071534 | Txndc5        | Txndc5        | TXNDC5   | 228.155289  | 218.6616838 | 185.3325666  | 207.7994091 | 236.2340525 | 287.1194894 | 249.9951787 | 188.3878477 | 129.7168496 | 141.8943119 |
| ENSMUSG00000025613 | 0.036682342  | 8.128120253  | 0.020701239 | 0.885595821 | 0.999071534 | Cct8          | Cct8          | CCT8     | 279.2463535 | 281.1533906 | 335.9278995  | 264.2764438 | 272.5324742 | 363.3742346 | 339.9494366 | 227.4885157 | 221.877882  | 229.8674782 |
| ENSMUSG00000020009 | -0.032457202 | 6.858435957  | 0.020693743 | 0.885616393 | 0.999071534 | Ifngr1        | Ifngr1        | IFNGR1   | 128.3592813 | 111.2281233 | 105.8273864  | 116.2150285 | 147.7443866 | 118.1657503 | 124.5769399 | 119.1672304 | 99.3893487  | 28.28034551 |
| ENSMUSG00000006127 | 0.033681426  | 4.817454242  | 0.020690266 | 0.885625938 | 0.999071534 | Inpp5k        | Inpp5k        | INPP5K   | 24.91391191 | 26.62122994 | 32.71762709  | 27.96098894 | 31.65483981 | 26.48542679 | 22.06791508 | 31.15618603 | 25.22053829 | 30.71871332 |
| ENSMUSG00000063410 | -0.036368812 | 5.238879421  | 0.020667875 | 0.885687414 | 0.999071534 | Stk24         | Stk24         | STK24    | 44.21342113 | 54.13181054 | 34.66991348  | 22.34103831 | 44.01592395 | 60.61088055 | 36.56414082 | 35.37021563 | 23.17775325 | 29.2808161  |
| ENSMUSG00000066697 | -0.130902659 | -0.152673291 | 0.020655011 | 0.885722751 | 0.999071534 | Gm10172       | Gm10172       |          | 0.771980369 | 0.237160178 | 0.1009803305 | 1.387642131 | 0.784830739 | 0           | 0.19414588  | 0.828989429 | 1.571373102 | 0.653589645 |
| ENSMUSG00000050503 | -0.083118867 | 1.261421227  | 0.02064872  | 0.885740037 | 0.999071534 | Fbxl22        | Fbxl22        | FBXL22   | 1.543960738 | 2.371601776 | 1.95228639   | 4.232308499 | 1.831271725 | 2.619437815 | 0.517722348 | 1.657978857 | 1.649941757 | 4.248332693 |
| ENSMUSG00000043192 | 0.129437938  | 0.021089911  | 0.020627184 | 0.885799229 | 0.999071534 | Gm1840        | Gm1840        |          | 0.561440268 | 0.948640711 | 1.481044848  | 0.069382107 | 1.308051232 | 2.110102684 | 0.258861174 | 1.519813953 | 0           | 0.849666539 |
| ENSMUSG00000033009 | -0.038345154 | 4.089843256  | 0.020621001 | 0.885816227 | 0.999071534 | Ogfod1        | Ogfod1        | OGFOD1   | 18.31698875 | 21.2258359  | 20.12874588  | 13.25198235 | 16.21983528 | 27.06752409 | 15.40223985 | 12.9184186  | 11.39245499 | 16.0129463  |
| ENSMUSG00000031292 | -0.052614925 | 2.996225434  | 0.020549779 | 0.886012237 | 0.999071534 | Cdkl5         | Cdkl5         | CDKL5    | 4.912602348 | 7.233385418 | 9.559471289  | 10.47669809 | 9.0255535   | 7.567264798 | 6.277383467 | 8.151729382 | 8.563983406 | 5.94766577  |
| ENSMUSG00000034640 | -0.057899837 | 6.680375354  | 0.020531718 | 0.886061996 | 0.999071534 | Tiparp        | Tiparp        | TIPARP   | 75.16281592 | 240.7768703 | 58.43395126  | 64.6641233  | 107.260201  | 54.2805725  | 101.2794343 | 192.256465  | 61.75496291 | 66.66614379 |
| ENSMUSG00000021838 | 0.036460245  | 4.990473907  | 0.020487931 | 0.886182727 | 0.999071534 | Samd4         | Samd4         | SAMD4A   | 25.19463204 | 50.63369792 | 28.07253188  | 22.75733095 | 36.36382425 | 46.93159418 | 27.11570797 | 34.26489639 | 19.64216377 | 30.58799539 |
| ENSMUSG00000020900 | -0.034471066 | 6.270106658  | 0.020461927 | 0.886254489 | 0.999071534 | Myh10         | Myh10         | MYH10    | 72.42579462 | 82.82819204 | 90.07445482  | 74.1694719  | 85.41574544 | 141.8134528 | 49.57191481 | 60.58531075 | 57.51225553 | 70.58768167 |
| ENSMUSG00000044906 | -0.039479053 | 4.090210711  | 0.020440405 | 0.886313917 | 0.999071534 | 4930503L19Rik | 4930503L19Rik | C18orf54 | 22.03653053 | 16.89766266 | 15.82025178  | 15.19468133 | 19.29375567 | 20.37340523 | 22.8444986  | 16.85611838 | 8.485414751 | 13.59466462 |

|                     |              |              |             |             |             |               |               |              |             |             |             |             |             |             |             |             |             |             |
|---------------------|--------------|--------------|-------------|-------------|-------------|---------------|---------------|--------------|-------------|-------------|-------------|-------------|-------------|-------------|-------------|-------------|-------------|-------------|
| ENSMUSG00000008398  | 0.036992906  | 7.677402127  | 0.020419642 | 0.886371282 | 0.999071534 | Elk3          | Elk3          | ELK3         | 190.6089711 | 153.3240548 | 259.6540899 | 207.8687912 | 235.7762346 | 217.9954359 | 175.0548689 | 186.2462917 | 205.2213271 | 205.8153792 |
| ENSMUSG000000020170 | 0.038261422  | 5.276861712  | 0.020411203 | 0.886394604 | 0.999071534 | Frs2          | Frs2          | FRS2         | 36.21289731 | 48.85499659 | 34.26599215 | 26.08767206 | 53.76090563 | 46.05844824 | 30.99862558 | 52.08816911 | 36.45585597 | 22.48348379 |
| ENSMUSG000000027322 | 0.056582445  | 3.913068678  | 0.02040317  | 0.886416809 | 0.999071534 | Siglec1       | Siglec1       | SIGLEC1      | 21.26455016 | 14.88180115 | 12.92548231 | 11.30928337 | 16.02362759 | 37.2542267  | 18.8968657  | 5.250266382 | 9.192532646 | 7.908434705 |
| ENSMUSG000000021469 | -0.043746241 | 3.766173627  | 0.020387284 | 0.886460736 | 0.999071534 | Msx2          | Msx2          | MSX2         | 10.31646493 | 10.79078808 | 19.05162236 | 10.5460802  | 20.53640434 | 18.48158903 | 13.26663516 | 10.22402095 | 9.899650542 | 13.26786979 |
| ENSMUSG000000001089 | -0.038274478 | 5.498964476  | 0.020366127 | 0.886519266 | 0.999071534 | Lup1          | Lup1          | LUZP1        | 49.89800385 | 60.4758453  | 53.92349649 | 31.43009427 | 42.44626248 | 74.29016691 | 24.72124211 | 35.71562789 | 46.27693785 | 36.33958426 |
| ENSMUSG000000053030 | 0.079732113  | 1.761149779  | 0.020360373 | 0.88653519  | 0.999071534 | Spink2        | Spink2        | SPINK2       | 1.824680872 | 3.794562842 | 2.558168373 | 4.162926393 | 3.989556257 | 4.220205368 | 8.154126978 | 1.519813953 | 0.942823861 | 1.895409971 |
| ENSMUSG000000025872 | 0.047734756  | 4.933689133  | 0.020330675 | 0.88661741  | 0.999071534 | Thoc3         | Thoc3         | THOC3        | 50.74016425 | 33.32100496 | 22.61959403 | 20.67586775 | 29.16954247 | 61.48402649 | 42.45323252 | 13.19474841 | 16.34228026 | 23.98673997 |
| ENSMUSG000000034211 | 0.034219296  | 5.996362824  | 0.020327435 | 0.886626383 | 0.999071534 | Mrps17        | Mrps17        | RP11-15K19.2 | 78.39109747 | 43.57818264 | 64.08884977 | 74.65514665 | 65.33715903 | 61.04745352 | 90.08368852 | 53.4007357  | 45.01983937 | 62.48317007 |
| ENSMUSG000000044165 | -0.136813448 | -0.463281843 | 0.020317707 | 0.886653333 | 0.999071534 | Bcl2l15       | Bcl2l15       | BCL2L15      | 0.631620302 | 0.059290044 | 0.740522424 | 1.457024238 | 0.261610246 | 0.436572969 | 0.388291761 | 0.828989429 | 0           | 1.111102397 |
| ENSMUSG000000096981 | 0.074915543  | 1.432209994  | 0.020289351 | 0.886731923 | 0.999071534 | Gm16845       | Gm16845       |              | 1.543960738 | 3.201662398 | 2.490848153 | 3.538487434 | 2.092881971 | 1.309718907 | 1.876743511 | 4.697606763 | 1.649941757 | 2.941153403 |
| ENSMUSG000000038059 | 0.033621241  | 5.36046953   | 0.020274048 | 0.886774358 | 0.999071534 | Smim3         | Smim3         | SMIM3        | 48.49440318 | 40.67297046 | 49.81696305 | 36.63375226 | 34.66335765 | 44.53044285 | 61.60895939 | 32.95232979 | 29.38467701 | 33.00627707 |
| ENSMUSG000000035062 | -0.056686255 | 2.821308138  | 0.02025373  | 0.886830726 | 0.999071534 | Zc4h2         | Zc4h2         | ZCAH2        | 8.140883891 | 4.802493597 | 9.020909526 | 3.330341114 | 11.77246109 | 6.985167506 | 6.665675228 | 8.08264693  | 4.00700141  | 7.320204025 |
| ENSMUSG000000045333 | 0.113581776  | -0.200038521 | 0.020221884 | 0.886919131 | 0.999071534 | Zfp423        | Zfp423        | ZNF423       | 0.771980369 | 0.711480533 | 1.211763966 | 0.346910533 | 0.654025616 | 1.236956746 | 1.229590576 | 0.069082452 | 0.942823861 | 0.261435858 |
| ENSMUSG000000034875 | 0.049195851  | 3.631336017  | 0.020216426 | 0.886934292 | 0.999071534 | Nudt19        | Nudt19        | NUDT19       | 18.45734882 | 6.759065062 | 14.81044848 | 11.37866547 | 11.24924059 | 18.69987551 | 17.60255983 | 7.529987311 | 9.035395336 | 8.758101244 |
| ENSMUSG000000027573 | -0.033553902 | 4.390229665  | 0.020204222 | 0.886968195 | 0.999071534 | Gid8          | Gid8          | GID8         | 24.00157147 | 22.17447661 | 24.30259954 | 17.48429085 | 21.77905301 | 28.66829164 | 20.19117157 | 17.89235517 | 13.43524002 | 21.30702243 |
| ENSMUSG000000024966 | 0.041060215  | 7.746349977  | 0.020184393 | 0.887023302 | 0.999071534 | Stip1         | Stip1         | STIP1        | 250.8936199 | 215.6971816 | 186.8809317 | 159.9951377 | 291.4338145 | 311.8586243 | 328.0418226 | 142.0335221 | 132.5453212 | 165.5542571 |
| ENSMUSG000000032405 | -0.037300774 | 4.870986939  | 0.020117692 | 0.887208877 | 0.999071534 | Pias1         | Pias1         | PIAS1        | 26.45787265 | 31.06798327 | 37.83396383 | 29.14048475 | 28.45011429 | 32.81573485 | 14.56094103 | 34.81755601 | 27.89187256 | 27.64684199 |
| ENSMUSG000000030850 | 0.034236959  | 4.881431151  | 0.02009332  | 0.887276761 | 0.999071534 | Ate1          | Ate1          | ATE1         | 33.2653359  | 31.00869322 | 24.77384109 | 30.7362732  | 30.73920395 | 43.43901043 | 34.49325142 | 24.80060041 | 24.74912636 | 18.0390742  |
| ENSMUSG000000032044 | 0.048744667  | 3.506354042  | 0.020090848 | 0.887283649 | 0.999071534 | Rpusd4        | Rpusd4        | RPUSD4       | 9.404124495 | 12.6880695  | 13.39672385 | 9.019673851 | 12.9497072  | 15.1345296  | 14.17264927 | 12.64208879 | 3.355589479 | 11.50317775 |
| ENSMUSG000000085936 | 0.077388648  | 1.509387958  | 0.020077019 | 0.887322191 | 0.999071534 | 2610307P16Rik | 2610307P16Rik |              | 1.824680872 | 3.201662398 | 4.106533441 | 2.705902155 | 1.831271725 | 0.873145938 | 1.553167044 | 4.144947144 | 3.142746204 | 3.137230296 |
| ENSMUSG000000031480 | 0.052005942  | 2.594471964  | 0.020060405 | 0.88736851  | 0.999071534 | Thsd1         | Thsd1         | THSD1        | 4.56170218  | 5.454684085 | 8.145746661 | 6.105625376 | 5.75542542  | 6.039259406 | 5.047792891 | 6.839162787 | 5.342668547 | 5.555511983 |
| ENSMUSG000000026956 | -0.034130509 | 6.312318268  | 0.020023199 | 0.887472311 | 0.999071534 | Uap1l1        | Uap1l1        | UAP1L1       | 76.28569646 | 100.9709456 | 65.70453505 | 69.24334234 | 106.0829549 | 64.32175079 | 69.56894049 | 102.8637716 | 55.39090184 | 83.72483353 |
| ENSMUSG000000030337 | 0.059536771  | 2.265485609  | 0.019989816 | 0.88756553  | 0.999071534 | Vamp1         | Vamp1         | VAMP1        | 5.193322482 | 5.454684085 | 5.520258068 | 3.954780073 | 3.662543449 | 4.80230266  | 4.077063489 | 4.006782239 | 2.121353688 | 8.365947457 |
| ENSMUSG000000083460 | -0.113513622 | 0.787028982  | 0.019987731 | 0.887571356 | 0.999071534 | Gm12182       | Gm12182       |              | 0.350900168 | 3.49811262  | 3.298690797 | 0.138764213 | 1.308051232 | 0.9459081   | 1.100159989 | 3.039627905 | 0.15713731  | 2.156845829 |
| ENSMUSG000000026930 | -0.039142923 | 4.130573044  | 0.019947099 | 0.887684929 | 0.999071534 | Gpsm1         | Gpsm1         | GPSM1        | 15.72032751 | 15.71186177 | 20.80194809 | 21.43907092 | 17.39708138 | 20.08235658 | 11.64875283 | 22.52087948 | 11.47102364 | 17.71227938 |
| ENSMUSG000000045973 | -0.028283355 | 5.987065601  | 0.019932353 | 0.887726178 | 0.999071534 | Slc25a51      | Slc25a51      | SLC25A51     | 62.46022985 | 67.47207054 | 62.00192293 | 60.63996112 | 79.79112515 | 80.32942632 | 64.32700172 | 58.16742492 | 48.31972289 | 54.64009433 |
| ENSMUSG000000020605 | -0.043502531 | 4.027456694  | 0.019866402 | 0.887910844 | 0.999071534 | Hs1bp3        | Hs1bp3        | HS1BP3       | 16.91338808 | 25.43542905 | 12.52156098 | 10.5460802  | 20.40559922 | 15.78938905 | 11.71346812 | 22.17546722 | 10.6853709  | 16.60117698 |
| ENSMUSG000000003812 | -0.036347708 | 5.106831582  | 0.019855805 | 0.887940547 | 0.999071534 | Dnase2a       | Dnase2a       | DNASE2       | 42.10802013 | 23.65672772 | 38.23788515 | 46.6247756  | 28.71172454 | 31.36049162 | 29.70431971 | 29.15279491 | 36.45585597 | 33.92130258 |
| ENSMUSG000000027330 | 0.040153521  | 4.883422384  | 0.019808521 | 0.888073173 | 0.999071534 | Cdc25b        | Cdc25b        | CDC25B       | 37.75685805 | 27.09555029 | 21.87907161 | 29.90368792 | 34.07473459 | 59.51944813 | 33.91081378 | 19.68849893 | 14.14235792 | 24.50961169 |
| ENSMUSG000000085227 | 0.073212706  | 1.37585916   | 0.019784121 | 0.888141677 | 0.999071534 | 6330418K02Rik | 6330418K02Rik |              | 3.298461576 | 1.185800888 | 1.211763966 | 3.399723221 | 3.335530641 | 3.783632399 | 2.135604685 | 1.796143762 | 1.414235792 | 3.398666154 |
| ENSMUSG000000030881 | -0.031640333 | 4.695533037  | 0.019733126 | 0.888284983 | 0.999071534 | Arfp2         | Arfp2         | ARFP2        | 26.94913288 | 28.5778014  | 23.76403778 | 24.28373729 | 32.04725518 | 31.65154026 | 26.66270091 | 23.62619872 | 15.63516236 | 27.58148302 |
| ENSMUSG000000092903 | 0.120428465  | 1.610193814  | 0.019716583 | 0.888331515 | 0.999071534 | Gm25734       | Gm27896       |              | 4.912602348 | 0.652190488 | 5.318297407 | 3.260959008 | 0.39241537  | 1.528005392 | 0           | 1.381649048 | 5.656943167 | 5.163358196 |
| ENSMUSG000000031176 | -0.039858475 | 7.750735017  | 0.019711098 | 0.888346945 | 0.999071534 | Dynlt3        | Dynlt3        | DYNLT3       | 220.2951253 | 219.4917444 | 199.5371331 | 284.8829295 | 203.0095512 | 144.6511771 | 301.443837  | 200.6845242 | 175.5223755 | 187.0573564 |
| ENSMUSG000000039958 | -0.046785596 | 3.37381535   | 0.019709241 | 0.888352171 | 0.999071534 | Mettl20       | Mettl20       | ETFBKMT      | 11.43934547 | 10.07930755 | 10.29999371 | 8.811527532 | 13.53833025 | 5.966497245 | 11.13103048 | 10.84594503 | 7.6997282   | 12.1567674  |
| ENSMUSG000000024889 | 0.041962638  | 4.525669784  | 0.01970418  | 0.888366413 | 0.999071534 | Rce1          | Rce1          | RCE1         | 32.6337156  | 26.85839012 | 20.33070654 | 18.80255087 | 18.96674286 | 29.39591325 | 38.05259257 | 13.12566595 | 13.04239675 | 21.24166346 |
| ENSMUSG000000009907 | 0.029280095  | 6.137521756  | 0.019702441 | 0.888371305 | 0.999071534 | Vps4b         | Vps4b         | VPS4B        | 71.16255401 | 82.1167115  | 60.18427699 | 65.7048549  | 82.66883786 | 89.93403164 | 82.83557565 | 65.35199996 | 47.53403633 | 62.35245214 |
| ENSMUSG000000036306 | -0.126855628 | -0.410519126 | 0.019701694 | 0.888373409 | 0.999071534 | Lzts1         | Lzts1         | LZTS1        | 1.052700503 | 0.592900444 | 1.009803305 | 0.138764213 | 0.654025616 | 0.436572969 | 0.064715293 | 0.483577167 | 1.492804447 | 0.196076894 |
| ENSMUSG000000019189 | -0.02945532  | 6.624879409  | 0.019654524 | 0.888506245 | 0.999071534 | Rnf145        | Rnf145        | RNF145       | 94.67286525 | 103.6389976 | 104.8849033 | 95.3310144  | 118.8364544 | 114.3821179 | 79.72924157 | 90.35984773 | 86.34695195 | 100.1952926 |
| ENSMUSG000000007655 | -0.036991571 | 8.854056308  | 0.019615491 | 0.888616286 | 0.999071534 | Cav1          | Cav1          | CAV1         | 322.4070741 | 552.5239238 | 501.8049224 | 450.4980178 | 606.6087588 | 515.0833414 | 503.2261221 | 405.583078  | 360.3158523 | 429.6044737 |

|                    |              |              |             |             |             |               |               |          |             |             |             |             |             |             |             |             |             |             |
|--------------------|--------------|--------------|-------------|-------------|-------------|---------------|---------------|----------|-------------|-------------|-------------|-------------|-------------|-------------|-------------|-------------|-------------|-------------|
| ENSMUSG00000030224 | 0.036938988  | 7.589666205  | 0.01960787  | 0.888637786 | 0.999071534 | Strap         | Strap         | STRAP    | 213.6982021 | 192.7519344 | 218.7907161 | 176.8549896 | 185.2200544 | 258.3056734 | 270.574642  | 122.2068583 | 146.4519731 | 158.8876427 |
| ENSMUSG00000051705 | 0.068165217  | 1.902743344  | 0.019606437 | 0.888641828 | 0.999071534 | Senp8         | Senp8         | SENP8    | 3.298461576 | 5.158233863 | 1.413724627 | 3.469105327 | 4.970594681 | 4.438491853 | 5.565515239 | 1.657978857 | 2.121353688 | 4.379050622 |
| ENSMUSG00000006818 | -0.030049629 | 6.020587716  | 0.019539492 | 0.888830868 | 0.999071534 | Sod2          | Sod2          | SOD2     | 60.91626911 | 57.21489285 | 82.3999497  | 71.81048028 | 66.5798077  | 79.16523174 | 61.5442441  | 50.84468496 | 59.00505998 | 59.54201666 |
| ENSMUSG00000083012 | -0.033354779 | 4.694888985  | 0.019528387 | 0.888862257 | 0.999071534 | Fam220a       | Fam220a       | FAM220A  | 29.75633422 | 31.89804389 | 24.57188042 | 22.89609516 | 26.55344001 | 31.65154026 | 30.61033382 | 17.47786046 | 16.34228026 | 29.01938024 |
| ENSMUSG00000055301 | -0.064545612 | 1.704897358  | 0.019508792 | 0.888917667 | 0.999071534 | Adh7          | Adh7          | ADH7     | 2.807201342 | 4.209593153 | 2.625488593 | 3.81601586  | 3.073920395 | 4.80230266  | 3.882917609 | 1.312566595 | 2.199922343 | 2.941153403 |
| ENSMUSG00000041720 | 0.034640021  | 5.05782729   | 0.019495503 | 0.888955261 | 0.999071534 | PI4ka         | PI4ka         | PI4KA    | 34.24785637 | 49.62576717 | 23.1581558  | 24.63064782 | 39.43774464 | 49.84208064 | 27.69814561 | 32.39967017 | 27.26323332 | 27.45076509 |
| ENSMUSG00000097061 | 0.06868107   | 2.103217124  | 0.019484715 | 0.888985792 | 0.999071534 | 9330151L19Rik | 9330151L19Rik |          | 4.140621979 | 3.083082309 | 6.530061373 | 4.02416218  | 3.27012808  | 2.837724299 | 2.523896446 | 7.391822406 | 1.492804447 | 6.339819557 |
| ENSMUSG00000042745 | -0.042758373 | 3.590595301  | 0.019483231 | 0.88898999  | 0.999071534 | Id1           | Id1           | ID1      | 17.12392818 | 9.01208675  | 14.60848781 | 10.47669809 | 11.70705853 | 17.0263458  | 12.29590576 | 11.67493445 | 8.32827744  | 8.431306421 |
| ENSMUSG00000095723 | 0.14313781   | 0.360329878  | 0.019448572 | 0.889088133 | 0.999071534 | Gm23647       | Gm23647       | RNA5SP19 | 1.894860906 | 0.830060622 | 0.471241542 | 2.428373729 | 0           | 0.363810808 | 0           | 0.483577167 | 1.492804447 | 3.267948225 |
| ENSMUSG00000094541 | 0.143137897  | 0.360329878  | 0.019446763 | 0.889093258 | 0.999071534 | Gm24089       | Gm24089       | RNA5SP19 | 1.894860906 | 0.830060622 | 0.471241542 | 2.428373729 | 0           | 0.363810808 | 0           | 0.483577167 | 1.492804447 | 3.267948225 |
| ENSMUSG00000034175 | 0.046840881  | 3.295894119  | 0.019373143 | 0.889302036 | 0.999071534 | Rhbdd3        | Rhbdd3        | RHBDD3   | 15.29924731 | 8.893506661 | 7.80914556  | 9.991023343 | 7.521294584 | 13.53376204 | 9.319002261 | 6.217420715 | 8.799689371 | 10.1306395  |
| ENSMUSG00000029999 | -0.100081974 | 1.266508055  | 0.019367175 | 0.889318976 | 0.999071534 | Tgfa          | Tgfa          | TGFA     | 1.333420637 | 3.853852886 | 0           | 3.052812688 | 3.924153696 | 1.600767553 | 2.135604685 | 3.315957715 | 0.864255206 | 2.679717545 |
| ENSMUSG00000025656 | 0.064110984  | 2.170883949  | 0.019333903 | 0.889413478 | 0.999071534 | Arhgef9       | Arhgef9       | ARHGEF9  | 1.824680872 | 5.51397413  | 5.92417939  | 4.995511672 | 3.793348573 | 3.492583753 | 3.882917609 | 6.148338263 | 4.871256616 | 2.61435858  |
| ENSMUSG00000074783 | 0.132977749  | -0.370812453 | 0.019293481 | 0.889528399 | 0.999071534 | AU019990      | AU019990      |          | 1.122880537 | 0.5336104   | 0           | 0.832585279 | 0.654025616 | 0.436572969 | 1.035444696 | 0.621742072 | 0           | 1.176461361 |
| ENSMUSG00000030522 | -0.038070406 | 4.366632467  | 0.019241754 | 0.889675641 | 0.999071534 | Mtmr10        | Mtmr10        | MTMR10   | 28.77381375 | 20.04003501 | 22.41763337 | 14.22333184 | 23.02170168 | 32.01535107 | 24.39766564 | 17.408778   | 13.90665195 | 12.54892118 |
| ENSMUSG00000020564 | -0.055243691 | 3.120617897  | 0.019228246 | 0.889714124 | 0.999071534 | Atxn7l1       | Atxn7l1       | ATXN7L1  | 8.140883891 | 12.33232924 | 8.347707322 | 6.175007483 | 10.52981242 | 8.294886414 | 5.694945826 | 14.85272726 | 3.064177549 | 9.150255031 |
| ENSMUSG00000038623 | -0.041261557 | 4.582070966  | 0.019196899 | 0.889803485 | 0.999071534 | Tm6sf1        | Tm6sf1        | TM6SF1   | 25.61571224 | 25.85045936 | 19.45554368 | 28.16913526 | 26.16102464 | 31.86982675 | 37.27600904 | 12.64208879 | 11.07818037 | 24.1174579  |
| ENSMUSG00000082214 | 0.19361358   | -0.877208152 | 0.019151503 | 0.889933025 | 0.999071534 | Gm15009       | Gm15009       |          | 0           | 0           | 1.548365068 | 0           | 0.457817931 | 0.582097292 | 0.064715293 | 1.174401691 | 0.31427462  | 0           |
| ENSMUSG00000098178 | -0.067077878 | 12.08957205  | 0.019139746 | 0.889966599 | 0.999071534 | Gm26924       | Gm24218       |          | 4787.962608 | 2964.857961 | 2522.690617 | 9964.796907 | 2441.935442 | 1560.966651 | 1996.272658 | 4532.983279 | 7296.199587 | 3585.854229 |
| ENSMUSG00000068220 | 0.037080433  | 12.03730504  | 0.019125973 | 0.890005946 | 0.999071534 | Lgalx1        | Lgalx1        | LGALS1   | 4688.798221 | 3177.8278   | 4419.909067 | 4590.389551 | 4634.490917 | 4022.219527 | 5251.128343 | 3198.310298 | 3418.993595 | 4610.748151 |
| ENSMUSG00000019804 | -0.034573737 | 8.177466667  | 0.019113342 | 0.89004204  | 0.999071534 | Snx3          | Snx3          | SNX3     | 318.2664521 | 296.2723519 | 288.6017846 | 286.4093358 | 332.3104155 | 300.2166784 | 309.7921099 | 309.1439745 | 189.5075961 | 280.3245988 |
| ENSMUSG00000027669 | 0.035507498  | 6.200905841  | 0.019105035 | 0.890065788 | 0.999071534 | Gnb4          | Gnb4          | GNB4     | 98.60294713 | 88.87577657 | 53.92349649 | 61.68069272 | 75.08214071 | 97.21024779 | 109.1099848 | 53.60798306 | 38.498641   | 70.13016891 |
| ENSMUSG00000085327 | -0.110613937 | -0.04852907  | 0.019076238 | 0.890148144 | 0.999071534 | Gm16104       | Gm16104       |          | 0.912340436 | 0.118580089 | 1.144443746 | 1.80393477  | 0.457817931 | 0.363810808 | 1.48845175  | 0.414494714 | 0.628549241 | 0.915025503 |
| ENSMUSG00000005897 | 0.043519776  | 3.912033807  | 0.019064987 | 0.890180338 | 0.999071534 | Nr2c1         | Nr2c1         | NR2C1    | 8.91286426  | 19.32855448 | 17.16665619 | 9.921641237 | 21.32123508 | 15.64386473 | 11.97232929 | 19.27400422 | 10.29249382 | 16.14366423 |
| ENSMUSG00000010751 | -0.034632479 | 4.652727971  | 0.019049175 | 0.8902256   | 0.999071534 | Tnfrsf22      | Tnfrsf22      |          | 29.75633422 | 37.6491782  | 24.23527932 | 17.34552664 | 23.1525068  | 32.88849701 | 21.09718567 | 23.97161098 | 16.34228026 | 27.12397027 |
| ENSMUSG00000031504 | -0.053822008 | 3.0907159    | 0.019037611 | 0.890258714 | 0.999071534 | Rab20         | Rab20         | RAB20    | 9.053224327 | 15.23754141 | 7.539864678 | 3.746633754 | 9.156358623 | 13.02442691 | 6.859821109 | 9.947873145 | 4.714119306 | 6.339819557 |
| ENSMUSG00000024668 | 0.031229193  | 6.035934637  | 0.019025195 | 0.890294279 | 0.999071534 | Sdhaf2        | Sdhaf2        | SDHAF2   | 88.0759421  | 59.76436476 | 59.9149961  | 66.19052965 | 62.52484889 | 55.80857789 | 84.25931211 | 61.89787734 | 50.59821388 | 65.16288761 |
| ENSMUSG00000033114 | -0.055285133 | 2.641834866  | 0.019020945 | 0.890306455 | 0.999071534 | Slc35d2       | Slc35d2       | SLC35D2  | 7.439083555 | 4.150303108 | 4.241173882 | 8.533999106 | 7.848307392 | 6.839643183 | 6.795105815 | 3.592287524 | 6.835472994 | 4.575127515 |
| ENSMUSG00000049047 | 0.032752994  | 5.705423727  | 0.018987591 | 0.890402065 | 0.999071534 | Armxc3        | Armxc3        | ARMCX3   | 47.58206274 | 71.50379355 | 44.16206454 | 39.61718284 | 65.59876928 | 56.82724815 | 68.01577345 | 51.74275684 | 27.73473525 | 53.72506882 |
| ENSMUSG00000055917 | 0.03943667   | 4.644695492  | 0.018940404 | 0.890537477 | 0.999071534 | Zfp277        | Zfp277        | ZNF277   | 30.03705436 | 31.12727331 | 20.59998742 | 20.32895722 | 25.83401183 | 23.50217817 | 43.87696898 | 22.17546722 | 12.64955347 | 21.04558657 |
| ENSMUSG00000020375 | 0.030171722  | 5.179114064  | 0.018935497 | 0.890551566 | 0.999071534 | Rufy1         | Rufy1         | RUFY1    | 43.932701   | 31.18656336 | 33.45814951 | 33.71970378 | 43.62350858 | 56.1723887  | 33.13423026 | 32.60691753 | 24.90626367 | 33.65986672 |
| ENSMUSG00000048251 | 0.101748187  | -0.251119453 | 0.018903279 | 0.890644133 | 0.999071534 | Bcl11b        | Bcl11b        | BCL11B   | 1.052700503 | 0.592900444 | 0.807842644 | 0.485674746 | 0.654025616 | 0.582097292 | 0.388291761 | 0.552659619 | 1.414235792 | 0.457512752 |
| ENSMUSG00000046245 | -0.032479877 | 4.542623076  | 0.018895461 | 0.890666606 | 0.999071534 | Pilra         | Pilra         | PILRB    | 25.68589228 | 19.32855448 | 26.99540836 | 23.10424148 | 26.61884257 | 27.57685922 | 21.8737692  | 23.211704   | 14.6923385  | 24.70568858 |
| ENSMUSG00000022681 | -0.031408214 | 6.209693932  | 0.018880559 | 0.890709457 | 0.999071534 | Ntan1         | Ntan1         | NTAN1    | 71.86435435 | 77.49208804 | 77.14897251 | 87.07454372 | 72.98925874 | 61.84783729 | 91.18384851 | 70.32593654 | 44.94127072 | 85.16273075 |
| ENSMUSG0000003929  | 0.043814659  | 3.308384474  | 0.018865196 | 0.890753651 | 0.999071534 | Zfp81         | Zfp81         |          | 11.57970553 | 11.97658897 | 7.607184899 | 7.007592761 | 12.0994739  | 10.62327558 | 11.97232929 | 8.635306549 | 6.442629718 | 10.65351121 |
| ENSMUSG00000098208 | -0.105088902 | 0.909534854  | 0.0188512   | 0.890793928 | 0.999071534 | Gm8349        | Gm8349        |          | 1.19306057  | 3.853852886 | 1.750325729 | 0.277528426 | 2.354492217 | 1.45524323  | 1.359021163 | 2.003391119 | 0           | 3.464025119 |
| ENSMUSG00000022263 | -0.032207363 | 6.000560547  | 0.018839102 | 0.890828757 | 0.999071534 | Trio          | Trio          | TRIO     | 52.00340485 | 79.98226991 | 71.09015268 | 61.05625376 | 71.3541947  | 78.00103715 | 38.6997455  | 79.03032554 | 49.89109599 | 60.84919595 |
| ENSMUSG00000024759 | 0.039848228  | 5.981292948  | 0.018829288 | 0.890857018 | 0.999071534 | At13          | At13          | ATL3     | 62.31986979 | 96.64277238 | 52.17317076 | 42.94752395 | 70.63476652 | 125.6602529 | 76.23461572 | 50.98284987 | 33.39167842 | 38.10427631 |
| ENSMUSG00000022639 | -0.046050187 | 3.334709502  | 0.018821379 | 0.890879801 | 0.999071534 | 5330426P16Rik |               |          |             |             |             |             |             |             |             |             |             |             |

|                     |              |              |             |             |             |               |               |           |             |             |             |             |             |             |             |             |             |             |
|---------------------|--------------|--------------|-------------|-------------|-------------|---------------|---------------|-----------|-------------|-------------|-------------|-------------|-------------|-------------|-------------|-------------|-------------|-------------|
| ENSMUSG00000036362  | -0.053674488 | 3.041236783  | 0.018820429 | 0.890882536 | 0.999071534 | P2ry13        | P2ry13        | P2RY13    | 8.91286426  | 6.521904885 | 11.915679   | 6.730064335 | 8.829345815 | 18.19054038 | 6.212668174 | 5.112101477 | 3.8498641   | 7.450921954 |
| ENSMUSG00000029649  | 0.038306754  | 7.945791824  | 0.018812394 | 0.890905687 | 0.999071534 | Pomp          | Pomp          | POMP      | 306.1954863 | 173.9569903 | 261.1351347 | 290.433498  | 226.6852785 | 233.2027277 | 346.420966  | 189.4240845 | 184.2434962 | 253.0699106 |
| ENSMUSG000000053063 | -0.089203718 | 4.204877585  | 0.018799684 | 0.890942315 | 0.999071534 | Clec12a       | Clec12a       | CLEC12A   | 59.51266844 | 11.50226861 | 7.270583797 | 7.076974868 | 14.19235587 | 26.8492376  | 48.98947716 | 4.490359406 | 2.042785033 | 8.496665386 |
| ENSMUSG000000068742 | -0.06573593  | 2.761146066  | 0.018775342 | 0.891012501 | 0.999071534 | Cry2          | Cry2          | CRY2      | 10.456825   | 6.699775018 | 7.607184899 | 5.689332737 | 4.90519212  | 9.750129644 | 6.665675228 | 7.737234668 | 0.628549241 | 8.104511599 |
| ENSMUSG00000030512  | 0.042009318  | 5.926685429  | 0.018775341 | 0.891012504 | 0.999071534 | Snrpa1        | Snrpa1        | SNRPA1    | 79.58415804 | 48.38067624 | 66.04113616 | 59.18293689 | 57.48885164 | 99.17482615 | 97.97895433 | 21.69189005 | 39.12719024 | 49.86888992 |
| ENSMUSG000000051390 | -0.037795583 | 4.157092959  | 0.018755682 | 0.89106922  | 0.999071534 | Zbtb22        | Zbtb22        | ZBTB22    | 23.6506713  | 18.5577839  | 18.37842015 | 11.37866547 | 21.84445557 | 28.30448083 | 13.9137881  | 13.74740803 | 12.33527885 | 18.36586903 |
| ENSMUSG00000026922  | -0.033420671 | 4.300444241  | 0.018746399 | 0.891096013 | 0.999071534 | Agpat2        | Agpat2        | AGPAT2    | 21.68563036 | 21.04796576 | 18.78234148 | 18.94131509 | 22.49848119 | 21.53759981 | 24.91538799 | 16.99428329 | 12.2567102  | 18.75802281 |
| ENSMUSG000000083261 | -0.181143289 | -0.219708207 | 0.018731994 | 0.891137603 | 0.999071534 | Gm7816        | Gm7816        |           | 0.912340436 | 0.830060622 | 0           | 0           | 2.289089656 | 0.727621615 | 2.459181152 | 0           | 0.15713731  | 0           |
| ENSMUSG000000076281 | -0.076790614 | 5.831727726  | 0.018731339 | 0.891139495 | 0.999071534 | Gm24270       | Gm24270       |           | 61.89878958 | 27.33271047 | 47.79735644 | 150.7673175 | 6.54025616  | 26.33990247 | 20.19117157 | 60.99980546 | 81.7114013  | 61.76422146 |
| ENSMUSG000000076258 | -0.076790614 | 5.831727726  | 0.018731334 | 0.891139509 | 0.999071534 | Gm23935       | Gm23935       |           | 61.89878958 | 27.33271047 | 47.79735644 | 150.7673175 | 6.54025616  | 26.33990247 | 20.19117157 | 60.99980546 | 81.7114013  | 61.76422146 |
| ENSMUSG000000087943 | -0.076790613 | 5.831727726  | 0.018731286 | 0.891139649 | 0.999071534 | Gm24245       | Gm24245       |           | 61.89878958 | 27.33271047 | 47.79735644 | 150.7673175 | 6.54025616  | 26.33990247 | 20.19117157 | 60.99980546 | 81.7114013  | 61.76422146 |
| ENSMUSG000000033054 | 0.039527066  | 3.742230008  | 0.018707244 | 0.891209096 | 0.999071534 | Npat          | Npat          | NPAT      | 11.22880537 | 16.66050248 | 13.26208341 | 11.44804758 | 15.36960198 | 20.37340523 | 14.17264927 | 13.0565835  | 9.742513232 | 8.888819173 |
| ENSMUSG000000074749 | 0.037365169  | 4.737671613  | 0.018685095 | 0.89127312  | 0.999071534 | Plk1s1        | Kiz           | KIZ       | 19.65040939 | 33.43958505 | 18.10913927 | 30.59750899 | 34.00933203 | 21.46483765 | 22.71506801 | 33.50498941 | 23.49202787 | 26.60109855 |
| ENSMUSG000000028649 | 0.031811629  | 6.753141763  | 0.018673754 | 0.891305916 | 0.999071534 | Macf1         | Macf1         | MACF1     | 74.88209579 | 114.9633961 | 112.8286893 | 114.61924   | 135.1216923 | 136.5745772 | 84.77703446 | 112.6734799 | 82.73279382 | 113.7899572 |
| ENSMUSG000000097207 | 0.096046528  | 0.384434602  | 0.018630124 | 0.891432181 | 0.999071534 | 6030443J06Rik | 6030443J06Rik |           | 1.754500839 | 0.889350666 | 1.346404407 | 1.110113705 | 0.784830739 | 1.309718907 | 0.129430587 | 0.828989429 | 0.864255206 | 2.745076509 |
| ENSMUSG000000045691 | -0.04575846  | 3.319666257  | 0.018570108 | 0.891606113 | 0.999071534 | Thtpa         | Thtpa         | THTPA     | 12.28150587 | 10.90936817 | 10.83855548 | 4.926129565 | 13.47292769 | 10.62327558 | 12.29590576 | 9.53337843  | 6.285492408 | 8.496665386 |
| ENSMUSG000000079487 | 0.041065874  | 5.171730484  | 0.018566295 | 0.891617173 | 0.999071534 | Med12         | Med12         | MED12     | 30.03705436 | 40.08007002 | 39.31500868 | 27.40593209 | 47.6784674  | 46.7133077  | 15.72581632 | 58.58191963 | 21.05639957 | 36.33958426 |
| ENSMUSG000000036885 | 0.104956988  | -0.077271589 | 0.018560496 | 0.891633996 | 0.999071534 | Arhgef26      | Arhgef26      | ARHGEF26  | 0.140360067 | 1.422961066 | 0.403921322 | 0.832585279 | 1.24264867  | 1.382481069 | 1.100159989 | 0.967154334 | 0.471411931 | 0.261435858 |
| ENSMUSG000000034744 | 0.028330036  | 5.238250271  | 0.018482494 | 0.891860543 | 0.999071534 | Nagk          | Nagk          | NAGK      | 39.30081878 | 39.2500094  | 35.54507634 | 41.3517355  | 37.60647292 | 37.47251318 | 41.41778783 | 37.37360675 | 28.83496462 | 38.16963527 |
| ENSMUSG000000056820 | -0.0334954   | 6.277351297  | 0.018479546 | 0.891869115 | 0.999071534 | Tsnax         | Tsnax         | TSNAX     | 104.7787901 | 91.01021816 | 66.57969792 | 65.77423701 | 80.18354052 | 113.9455449 | 105.2270672 | 54.29880758 | 41.95566182 | 66.01255415 |
| ENSMUSG000000030589 | -0.060227387 | 1.966318349  | 0.018473686 | 0.891886154 | 0.999071534 | Rasgrp4       | Rasgrp4       | RASGRP4   | 6.807463254 | 3.379532531 | 3.500651458 | 2.358991623 | 4.120361381 | 3.929156722 | 3.235764674 | 2.694215643 | 2.592765618 | 5.490153018 |
| ENSMUSG000000060260 | 0.0388815    | 3.927501468  | 0.018462442 | 0.89191886  | 0.999071534 | Pwwp2b        | Pwwp2b        | PWWP2B    | 12.84294614 | 22.76737705 | 11.37711724 | 15.95788451 | 14.19235587 | 20.30064306 | 14.36679515 | 13.67832557 | 13.59237733 | 12.35284429 |
| ENSMUSG000000068328 | 0.02837578   | 6.665904671  | 0.018432708 | 0.892005392 | 0.999071534 | Aup1          | Aup1          | AUP1      | 101.9715887 | 98.0064434  | 120.7051551 | 95.05348597 | 105.6905395 | 108.997718  | 101.1500037 | 102.3801944 | 84.77557885 | 96.40447264 |
| ENSMUSG000000035248 | 0.03149954   | 5.94403272   | 0.018412718 | 0.892063611 | 0.999071534 | Zcchc6        | Zcchc6        | ZCCHC6    | 52.00340485 | 76.54344733 | 56.27970421 | 60.4318148  | 70.24235115 | 63.30308052 | 41.54721841 | 70.6713488  | 62.14780618 | 58.10411944 |
| ENSMUSG000000099034 | 0.084931362  | 0.799551883  | 0.018409495 | 0.892072999 | 0.999071534 | RP24-289J12.1 | 2810039B14Rik |           | 0.912340436 | 0.889350666 | 1.346404407 | 3.746633754 | 1.046440986 | 1.600767553 | 0.711868228 | 1.796143762 | 1.257098482 | 2.61435858  |
| ENSMUSG000000084353 | -0.043908106 | 4.411024166  | 0.018359934 | 0.892217485 | 0.999071534 | Gm15452       | Gm15452       |           | 27.79129328 | 13.93316044 | 21.81175139 | 23.65929833 | 24.19894779 | 23.28389169 | 36.88771728 | 12.08942917 | 8.878258026 | 21.89525311 |
| ENSMUSG000000027775 | 0.035414729  | 7.071347138  | 0.018324397 | 0.892321211 | 0.999071534 | Mfsd1         | Mfsd1         | MFSD1     | 136.7107053 | 169.3916569 | 108.452875  | 127.4549297 | 148.136802  | 195.2208794 | 193.2398663 | 110.4628414 | 78.72579241 | 97.45021608 |
| ENSMUSG000000029161 | -0.078299011 | 0.775746987  | 0.018309627 | 0.892364351 | 0.999071534 | Cgref1        | Cgref1        | CGREF1    | 1.684320805 | 2.608761954 | 1.615685288 | 1.318260024 | 1.177246109 | 1.091432423 | 1.48845175  | 2.348803381 | 0.471411931 | 2.0261279   |
| ENSMUSG000000094472 | 0.076384308  | 2.29215333   | 0.018304775 | 0.892378529 | 0.999071534 | Gm21897       | Gm21897       |           | 3.789721811 | 3.913142931 | 7.472544458 | 7.146356975 | 1.504258917 | 1.528005392 | 2.135604685 | 5.802926001 | 8.17114013  | 4.31691657  |
| ENSMUSG000000021215 | -0.027779063 | 5.646291127  | 0.018302274 | 0.892385834 | 0.999071534 | Net1          | Net1          | NET1      | 53.68772566 | 55.61406165 | 49.88428327 | 45.44527979 | 57.75046189 | 62.86650756 | 51.83695008 | 52.01908665 | 38.97005293 | 35.1631229  |
| ENSMUSG000000030275 | 0.032803032  | 6.233046218  | 0.018282018 | 0.89244504  | 0.999071534 | Etnk1         | Etnk1         | ETNK1     | 93.26926458 | 92.19601905 | 56.88558619 | 66.19052965 | 78.15606111 | 111.9082044 | 102.1207331 | 61.89787734 | 44.94127072 | 56.27406844 |
| ENSMUSG000000060131 | 0.058852743  | 2.632832129  | 0.018255534 | 0.89252225  | 0.999071534 | Atp8b4        | Atp8b4        | ATP8B4    | 9.544484562 | 10.43504782 | 2.827449254 | 3.052812688 | 5.297607489 | 6.621356699 | 6.018522294 | 8.013564478 | 3.457020824 | 6.078383699 |
| ENSMUSG000000083087 | 0.077275425  | 1.441537114  | 0.018250561 | 0.892537049 | 0.999071534 | Gm11249       | Gm11249       |           | 2.105401006 | 1.956571465 | 5.722218729 | 0.485674746 | 2.87771271  | 3.34705943  | 3.559341141 | 2.694215643 | 1.964216377 | 1.372538255 |
| ENSMUSG000000043432 | -0.057981809 | 1.911637769  | 0.018237244 | 0.892576027 | 0.999071534 | Leng9         | Leng9         | LENG9     | 2.526481208 | 3.735272798 | 4.375814322 | 4.440454819 | 4.054958819 | 2.983248622 | 3.365195261 | 3.799534882 | 2.784909998 | 4.705845444 |
| ENSMUSG000000068663 | 0.034892609  | 4.370488274  | 0.018230383 | 0.892596113 | 0.999071534 | Clec16a       | Clec16a       | CLEC16A   | 19.79076946 | 27.45129056 | 21.13854919 | 14.29271395 | 23.21790937 | 28.15895651 | 14.49622574 | 17.89235517 | 17.04939816 | 23.92138101 |
| ENSMUSG000000021807 | 0.035247266  | 7.199313009  | 0.018213227 | 0.892646356 | 0.999071534 | 2700060E02Rik | 2700060E02Rik | C14orf166 | 185.6963688 | 125.5763141 | 162.1070906 | 160.3420482 | 117.5938057 | 122.4587178 | 189.6158099 | 117.5092515 | 134.2738316 | 144.5740295 |
| ENSMUSG000000015619 | -0.080501038 | 3.025228566  | 0.018202729 | 0.892677111 | 0.999071534 | Gata3         | Gata3         | GATA3     | 2.245761073 | 4.743203553 | 16.35881354 | 14.98653501 | 3.597140888 | 9.895653967 | 1.359021163 | 4.490359406 | 12.80669078 | 7.843075741 |
| ENSMUSG000000051098 | 0.050315133  | 3.166730838  | 0.018200842 | 0.89268264  | 0.999071534 | Mblac2        | Mblac2        | MBLAC2    | 8.000523824 | 6.46261484  | 9.155549966 | 9.505348597 | 11.96866877 | 5.529924276 | 6.795105815 | 7.529987311 | 10.60676844 | 11.50317775 |
| ENSMUSG000000031171 | -0.028371954 | 5.185143913  | 0.018191954 | 0.892708689 | 0.999071534 | Ftsj1         | Ftsj1         | FTSJ1     | 44.3537812  | 33.49887509 | 34.26599215 | 36.63375226 | 41.53062661 | 39.65537803 | 39.60575961 | 33.43590696 | 24.12057712 | 37.97355838 |

|                     |              |              |             |             |             |               |               |          |  |  |             |             |             |             |             |             |             |             |             |             |
|---------------------|--------------|--------------|-------------|-------------|-------------|---------------|---------------|----------|--|--|-------------|-------------|-------------|-------------|-------------|-------------|-------------|-------------|-------------|-------------|
| ENSMUSG00000074466  | -0.053819722 | 2.595515375  | 0.018188707 | 0.892718206 | 0.999071534 | Gm15417       | Gm15417       |          |  |  | 8.211063924 | 4.921073686 | 4.645095204 | 9.019673851 | 4.251166504 | 4.947826984 | 4.400639957 | 6.35558562  | 4.714119306 | 7.320204025 |
| ENSMUSG00000034422  | -0.03839215  | 4.789892289  | 0.018171752 | 0.892767917 | 0.999071534 | Parp14        | Parp14        | PARP14   |  |  | 36.14271727 | 39.72432975 | 22.61959403 | 19.91266458 | 27.27286819 | 46.93159418 | 15.20809397 | 26.45857927 | 16.26371161 | 30.91479021 |
| ENSMUSG00000019122  | -0.05912116  | 6.542420214  | 0.018170389 | 0.892771914 | 0.999071534 | Cc19          | Cc19          | CCL23    |  |  | 192.503832  | 104.0540279 | 54.9332998  | 69.65963498 | 75.67076377 | 85.8593506  | 230.3217295 | 55.81862153 | 23.57059653 | 57.4505298  |
| ENSMUSG00000063550  | 0.057965054  | 3.554968703  | 0.01814727  | 0.892839742 | 0.999071534 | Nup98         | Nup98         | NUP98    |  |  | 14.52726694 | 23.30098745 | 6.597381593 | 5.064893778 | 10.20279961 | 26.33990247 | 11.00159989 | 11.32952219 | 5.735511822 | 6.274460592 |
| ENSMUSG00000026946  | -0.034224887 | 4.345950833  | 0.01813061  | 0.892888643 | 0.999071534 | Nmi           | Nmi           | NMI      |  |  | 20.28202969 | 17.60914319 | 25.91828483 | 23.3123878  | 18.63973005 | 19.71854577 | 21.22661626 | 15.47446934 | 15.71373102 | 24.18281687 |
| ENSMUSG00000093392  | 0.253807177  | -0.693747646 | 0.018126503 | 0.892900702 | 0.999071534 | Gm6061        | Gm6061        |          |  |  | 0           | 0           | 0           | 0           | 2.485297341 | 0           | 0           | 0.345412262 | 1.885647722 | 0           |
| ENSMUSG00000050373  | -0.046436909 | 4.409027359  | 0.01811009  | 0.89294891  | 0.999071534 | Snx21         | Snx21         | SNX21    |  |  | 18.66788892 | 28.044191   | 14.33920693 | 15.47220976 | 35.64439607 | 15.4983404  | 12.8783434  | 35.78471034 | 11.94243557 | 23.52922722 |
| ENSMUSG00000034165  | -0.030383116 | 6.332184273  | 0.018107858 | 0.892955467 | 0.999071534 | Ccnd3         | Ccnd3         | CCND3    |  |  | 76.56641659 | 67.47207054 | 100.5764092 | 76.38969931 | 101.3739705 | 114.5276422 | 66.20374523 | 71.15492597 | 49.26254675 | 92.48293477 |
| ENSMUSG00000020017  | 0.046412943  | 4.418248346  | 0.018080889 | 0.89303473  | 0.999071534 | Hal           | Hal           | HAL      |  |  | 27.22985301 | 30.59366291 | 17.50325729 | 17.55367296 | 15.95822503 | 12.07851881 | 14.81980221 | 39.92965748 | 15.16375043 | 20.0652021  |
| ENSMUSG00000037062  | -0.034754981 | 8.224957976  | 0.018068718 | 0.893070522 | 0.999071534 | Sh3glb1       | Sh3glb1       | SH3GLB1  |  |  | 270.8949295 | 334.0994002 | 344.5448877 | 316.7986985 | 302.4868474 | 292.0673164 | 241.3880447 | 321.5788159 | 262.89072   | 296.2721861 |
| ENSMUSG00000044854  | 0.088071928  | 0.338724435  | 0.018066761 | 0.893076278 | 0.999071534 | 1700056E22Rik | 1700056E22Rik |          |  |  | 0.771980369 | 0.830060622 | 1.481044848 | 1.526406344 | 1.046440986 | 1.164194584 | 0.841298815 | 2.486968286 | 0.628549241 | 0.522871716 |
| ENSMUSG00000047033  | 0.094155791  | 0.268457783  | 0.01806292  | 0.893087577 | 0.999071534 | Pcdhb15       | Pcdhb15       | PCDHB7   |  |  | 0.771980369 | 2.312311732 | 0.605881983 | 1.318260024 | 0.327012808 | 0.9459081   | 0.582437641 | 0.898071881 | 1.021392516 | 1.830051006 |
| ENSMUSG00000044066  | 0.036945478  | 4.353223762  | 0.018028933 | 0.893187603 | 0.999071534 | Cep68         | Cep68         | CEP68    |  |  | 24.70337181 | 24.4274983  | 18.24377971 | 11.44804758 | 26.16102464 | 31.5787781  | 21.22661626 | 16.44162367 | 11.70672961 | 21.43774036 |
| ENSMUSG00000041040  | -0.034437322 | 5.070751656  | 0.018015558 | 0.893226993 | 0.999071534 | Fam117b       | Fam117b       | FAM117B  |  |  | 25.33499211 | 48.97357668 | 29.75553739 | 32.95650061 | 38.91452415 | 35.65345915 | 22.65035272 | 46.1470782  | 24.98483232 | 30.1958416  |
| ENSMUSG00000041654  | -0.041167618 | 4.827151093  | 0.018014228 | 0.89323091  | 0.999071534 | Slc39a11      | Slc39a11      | SLC39A11 |  |  | 31.51083506 | 31.54230362 | 27.39932968 | 27.89160683 | 30.60839883 | 37.18146454 | 51.96638066 | 19.27400422 | 10.60676844 | 20.19592003 |
| ENSMUSG00000020752  | -0.04262479  | 3.508789201  | 0.017992619 | 0.893294583 | 0.999071534 | Recql5        | Recql5        | RECQL5   |  |  | 15.01852718 | 12.39161928 | 13.32940363 | 6.521918016 | 12.4264867  | 11.93299449 | 9.513148141 | 11.81309936 | 7.071178959 | 13.59466462 |
| ENSMUSG00000002814  | 0.04210916   | 3.602715034  | 0.017982148 | 0.893325452 | 0.999071534 | Top3a         | Top3a         | TOP3A    |  |  | 18.31698875 | 8.774926572 | 12.45424076 | 9.713494917 | 12.49188926 | 19.20921064 | 9.707294022 | 10.91502748 | 7.149747614 | 13.66002358 |
| ENSMUSG000000031355 | 0.080838281  | 0.659652159  | 0.017981768 | 0.893326573 | 0.999071534 | Arhgap6       | Arhgap6       | ARHGAP6  |  |  | 1.263240604 | 1.660121243 | 0.336601102 | 2.22022741  | 1.765869163 | 2.619437815 | 1.229590576 | 1.312566595 | 0.942823861 | 1.30717929  |
| ENSMUSG000000045730 | -0.048524228 | 3.107364541  | 0.017977009 | 0.893340604 | 0.999071534 | Adrb2         | Adrb2         | ADRB2    |  |  | 7.298723488 | 7.233385418 | 8.751628644 | 11.93372233 | 9.287163747 | 8.003837767 | 5.500799946 | 11.88218181 | 7.85686551  | 6.470537486 |
| ENSMUSG000000038007 | 0.112573975  | 0.151674505  | 0.017976564 | 0.893341916 | 0.999071534 | Acer2         | Acer2         | ACER2    |  |  | 0.210540101 | 0.830060622 | 1.009803305 | 1.734552664 | 1.046440986 | 1.382481069 | 1.553167044 | 0.621742072 | 1.335667137 | 0           |
| ENSMUSG000000045725 | -0.093565853 | 0.10321785   | 0.017950935 | 0.893417521 | 0.999071534 | Prr15         | Prr15         | PRR15    |  |  | 0.561440268 | 0.830060622 | 1.615685288 | 1.595788451 | 0.39241537  | 0.509335131 | 0.906014109 | 0.898071881 | 1.099961171 | 0.849666539 |
| ENSMUSG000000020088 | -0.0337101   | 8.150433593  | 0.017926147 | 0.893490696 | 0.999071534 | Sar1a         | Sar1a         | SAR1A    |  |  | 301.7741442 | 308.486101  | 254.2684722 | 298.8287329 | 328.7132746 | 306.6925108 | 339.4317143 | 262.0988244 | 196.7359124 | 259.9326018 |
| ENSMUSG000000038963 | 0.08598331   | 0.631569703  | 0.017913004 | 0.893529514 | 0.999071534 | Slc04a1       | Slc04a1       | SLC04A1  |  |  | 1.684320805 | 3.083082309 | 0.807842644 | 0.485674746 | 1.111843547 | 2.182864846 | 2.070898391 | 1.105319238 | 1.257098482 | 0.522871716 |
| ENSMUSG000000026027 | -0.042528428 | 3.436073849  | 0.017897355 | 0.893575756 | 0.999071534 | Stradb        | Stradb        | STRADB   |  |  | 11.7200656  | 10.37575777 | 12.52156098 | 8.395234892 | 13.53833025 | 12.15128097 | 9.707294022 | 8.842553906 | 5.814080477 | 15.16327977 |
| ENSMUSG000000031068 | 0.042740662  | 6.998755815  | 0.017883841 | 0.893615703 | 0.999071534 | Glr3          | Glr3          | GLRX3    |  |  | 178.6081854 | 149.2330418 | 90.61301658 | 104.2813061 | 133.9444461 | 157.6028419 | 248.1184352 | 86.21490059 | 61.99066887 | 88.8283276  |
| ENSMUSG000000038812 | 0.039785088  | 6.606213411  | 0.017879722 | 0.893627881 | 0.999071534 | Trmt112       | Trmt112       | TRMT112  |  |  | 86.88288152 | 58.93430414 | 124.7443683 | 130.0914498 | 93.85267589 | 77.05512905 | 60.83237587 | 86.14581814 | 104.5748799 | 136.0120051 |
| ENSMUSG000000053559 | -0.061267803 | 2.114907115  | 0.01783769  | 0.893752245 | 0.999071534 | Smagp         | Smagp         | SMAGP    |  |  | 5.052962415 | 4.743203553 | 4.914376085 | 3.052812688 | 4.578179312 | 8.14936209  | 6.277383467 | 2.141556024 | 2.121353688 | 2.156845829 |
| ENSMUSG000000043542 | -0.030444525 | 5.386471265  | 0.017826103 | 0.893786554 | 0.999071534 | Zc2hc1a       | Zc2hc1a       | ZC2HC1A  |  |  | 36.91469764 | 41.74019126 | 50.22088437 | 45.72280822 | 43.62350858 | 32.30639972 | 42.32380194 | 49.1867061  | 33.86309035 | 38.88858388 |
| ENSMUSG000000019817 | 0.110412274  | -0.25473793  | 0.017824468 | 0.893791394 | 0.999071534 | Plagl1        | Plagl1        | PLAGL1   |  |  | 0.771980369 | 0.415030311 | 1.144443746 | 0.763203172 | 0.39241537  | 0.873145938 | 0.776583522 | 1.519813953 | 0           | 0.457512752 |
| ENSMUSG000000017485 | -0.031226072 | 6.990692149  | 0.017824279 | 0.893791955 | 0.999071534 | Top2b         | Top2b         | TOP2B    |  |  | 102.9541092 | 126.3470846 | 159.7508829 | 129.3976287 | 147.548179  | 149.2351933 | 96.55521787 | 124.9701564 | 104.8891546 | 132.6786979 |
| ENSMUSG000000049739 | -0.039679501 | 3.928307832  | 0.017823665 | 0.893793772 | 0.999071534 | Zfp646        | Zfp646        | ZNF646   |  |  | 11.79024564 | 18.91352417 | 14.06992605 | 15.33344555 | 19.35915823 | 25.61228086 | 10.41916225 | 15.75079915 | 8.406846095 | 14.24825426 |
| ENSMUSG000000026727 | 0.033906523  | 6.034382801  | 0.017819855 | 0.893805059 | 0.999071534 | Rsu1          | Rsu1          | RSU1     |  |  | 37.47613791 | 65.45620903 | 65.8986405  | 59.04417267 | 88.03184791 | 65.48594537 | 53.26068653 | 79.79023251 | 53.26954816 | 66.14327208 |
| ENSMUSG000000031708 | 0.031572948  | 6.752454011  | 0.017811846 | 0.893828784 | 0.999071534 | Tecr          | Tecr          | TECR     |  |  | 79.65433807 | 89.82441728 | 119.8973124 | 130.5771245 | 130.7397206 | 117.2198422 | 91.83100145 | 105.7652346 | 89.01828623 | 121.502315  |
| ENSMUSG000000039079 | 0.164691409  | -0.703313086 | 0.017781533 | 0.893918632 | 0.999071534 | Trhr2         | Trhr2         |          |  |  | 1.614140771 | 0.5336104   | 0           | 0           | 0.327012808 | 0.291048646 | 0.19414588  | 0.552659619 | 1.257098482 | 0           |
| ENSMUSG000000034285 | -0.089271518 | 1.237228572  | 0.017764769 | 0.893968351 | 0.999071534 | Nipsnap1      | Nipsnap1      | NIPSNAP1 |  |  | 2.17558104  | 2.075151554 | 2.154247051 | 3.122194795 | 2.289089656 | 4.001918884 | 3.429910554 | 0           | 1.335667137 | 2.091486864 |
| ENSMUSG000000020747 | 0.031364272  | 4.869983463  | 0.017757467 | 0.893990016 | 0.999071534 | 2310067810Rik | Tmem94        | TMEM94   |  |  | 28.63345369 | 31.54230362 | 24.90848153 | 28.5854279  | 35.97140888 | 32.88849701 | 19.28515746 | 30.60352641 | 25.06340098 | 34.05202051 |
| ENSMUSG000000078995 | 0.069464616  | 1.382733108  | 0.017729594 | 0.894072759 | 0.999071534 | Zfp456        | Zfp456        |          |  |  | 3.579181711 | 2.54947191  | 0.875162864 | 3.399723221 | 2.092881971 | 1.673529715 | 2.718042326 | 2.970545453 | 1.571373102 | 3.202589261 |
| ENSMUSG000000004952 | 0.044892504  | 5.433070175  | 0.017726545 | 0.894081813 | 0.999071534 | Rasa4         | Rasa4         | RASA4B   |  |  | 38.38847835 | 57.2741829  | 40.39213221 | 26.64272891 | 58.99311056 | 22.92008088 | 25.49782563 | 76.88876951 | 28.20614718 | 53.65970986 |
| ENSMUSG000000030534 | 0.044333395  | 3.312411003  | 0.017716335 | 0.894111214 | 0.999071534 | Vps33b        | Vps33b        | VPS33B   |  |  | 15.29924731 | 7.885575906 | 9.82875217  | 6.452535909 | 10.98763035 | 13.75204853 | 9.772009315 | 10.1551205  | 8.17114013  | 6.731973344 |

|                     |              |              |             |             |             |               |               |              |  |  |             |             |             |             |             |             |             |             |             |             |
|---------------------|--------------|--------------|-------------|-------------|-------------|---------------|---------------|--------------|--|--|-------------|-------------|-------------|-------------|-------------|-------------|-------------|-------------|-------------|-------------|
| ENSMUSG00000089810  | 0.065051491  | 2.656112126  | 0.017703126 | 0.894151391 | 0.999071534 | Gm16536       | Gm16536       |              |  |  | 4.140621979 | 5.691844263 | 10.16535327 | 5.203657991 | 6.082438228 | 3.128772945 | 1.941458804 | 11.12227484 | 4.635550651 | 8.888819173 |
| ENSMUSG000000026229 | -0.03228428  | 7.590764923  | 0.017637422 | 0.894346844 | 0.999071534 | Psm d1        | Psm d1        | PSMD1        |  |  | 226.049888  | 208.226636  | 195.9691614 | 186.2909561 | 195.8152694 | 263.3990247 | 213.3016073 | 139.1320591 | 144.4091881 | 174.8352301 |
| ENSMUSG000000022711 | 0.028290296  | 5.025156097  | 0.017627995 | 0.894374917 | 0.999071534 | Pmm2          | Pmm2          | PMIM2        |  |  | 36.98487768 | 32.78739456 | 32.17906532 | 31.98515112 | 32.89748848 | 44.74872934 | 29.05716677 | 31.91609301 | 20.34928167 | 35.29384083 |
| ENSMUSG000000028992 | -0.046112062 | 2.875769482  | 0.017625281 | 0.894383002 | 0.999071534 | Nmnat1        | Nmnat1        | NMNNAT1      |  |  | 7.298723488 | 7.114805329 | 6.933982695 | 6.799446442 | 9.941189363 | 6.766881022 | 8.995425794 | 6.079255811 | 6.285492408 | 5.882306805 |
| ENSMUSG000000049916 | 0.109871855  | 0.183733502  | 0.017614569 | 0.894414914 | 0.999071534 | 2610318N02Rik | 2610318N02Rik |              |  |  | 0.98252047  | 0           | 1.077123525 | 1.387642131 | 1.569661478 | 1.528005392 | 1.035444696 | 0.207247357 | 1.414235792 | 0.849666539 |
| ENSMUSG000000039081 | 0.045317591  | 5.649238609  | 0.017610188 | 0.894427968 | 0.999071534 | Zfp503        | Zfp503        |              |  |  | 31.30029496 | 54.30968068 | 60.99211963 | 53.9792789  | 54.41493125 | 34.27097808 | 21.29133155 | 98.16616485 | 41.79852451 | 44.05194208 |
| ENSMUSG000000018412 | -0.037664168 | 5.278330978  | 0.017567115 | 0.8945564   | 0.999071534 | Kans1         | Kans1         | KANSL1       |  |  | 24.56301174 | 53.30174992 | 47.59539578 | 31.49947637 | 46.8282341  | 39.65537803 | 22.32677625 | 55.74953908 | 34.17736497 | 30.58799539 |
| ENSMUSG000000033720 | -0.046214247 | 3.625456921  | 0.017507498 | 0.894734428 | 0.999071534 | Sfxn5         | Sfxn5         | SFXN5        |  |  | 18.24680872 | 11.73942879 | 11.915679   | 11.86434022 | 10.7260201  | 20.30064306 | 7.183397576 | 5.457513739 | 10.68533709 | 15.68615148 |
| ENSMUSG000000026109 | -0.070470095 | 1.401695959  | 0.017503717 | 0.894745731 | 0.999071534 | Tmeff2        | Tmeff2        | TMEFF2       |  |  | 4.140621979 | 1.660121243 | 1.481044848 | 1.457024238 | 4.774386997 | 2.182864846 | 1.48845175  | 2.072473572 | 2.985608894 | 2.810435474 |
| ENSMUSG000000024696 | 0.059419042  | 2.892703235  | 0.017466468 | 0.894857134 | 0.999071534 | Lpxn          | Lpxn          | LPXN         |  |  | 10.31646493 | 6.99622524  | 5.049016526 | 7.562649614 | 7.194281776 | 14.62519447 | 12.61948223 | 3.315957715 | 4.242707375 | 2.941153403 |
| ENSMUSG000000093283 | -0.133498079 | -0.114776637 | 0.017463058 | 0.894867338 | 0.999071534 | Gm22567       | Gm22567       |              |  |  | 0.771980369 | 0.059290044 | 1.279084186 | 2.01208109  | 0.196207685 | 0.072762162 | 0.19414588  | 0.483577167 | 2.199922343 | 0.326794823 |
| ENSMUSG000000056214 | 0.037371313  | 3.769774665  | 0.017451773 | 0.894901116 | 0.999071534 | Pard6g        | Pard6g        | PARD6G       |  |  | 12.49204597 | 13.16238986 | 17.97449883 | 10.96237283 | 14.71557636 | 15.64386473 | 13.59021163 | 10.63869767 | 13.59237733 | 12.28748533 |
| ENSMUSG000000095362 | 0.096497785  | 2.48363392   | 0.017429868 | 0.894966713 | 0.999071534 | Gm14325       | Gm14325       | ZNF788       |  |  | 9.193584394 | 8.122736084 | 0.875162864 | 3.052812688 | 6.409451036 | 4.074681045 | 12.10175988 | 5.526596192 | 0           | 6.274460592 |
| ENSMUSG000000026209 | -0.030708138 | 5.058845479  | 0.017426087 | 0.894978039 | 0.999071534 | Dnpep         | Dnpep         | DNPEP        |  |  | 45.6170218  | 35.5147366  | 28.40913298 | 28.16913526 | 37.27946011 | 44.16663204 | 40.83535019 | 27.70206341 | 18.38506529 | 31.37230296 |
| ENSMUSG000000078572 | 0.04655496   | 3.295256278  | 0.017337885 | 0.895242624 | 0.999071534 | 1810043H04Rik | 1810043H04Rik | C17orf89     |  |  | 13.12366627 | 7.470545595 | 10.09803305 | 11.72557601 | 6.867268968 | 10.98708639 | 14.43151045 | 5.526596192 | 8.249708785 | 8.496665386 |
| ENSMUSG000000027394 | -0.034021276 | 4.246620135  | 0.017308466 | 0.895331025 | 0.999071534 | Ttl           | Ttl           | TTL          |  |  | 20.91365    | 21.52228612 | 15.41633046 | 19.98204669 | 21.25583252 | 29.03210245 | 18.70271982 | 17.2706131  | 10.37106247 | 17.38548456 |
| ENSMUSG000000097876 | -0.092052155 | 0.342646247  | 0.017303075 | 0.895347235 | 0.999071534 | Gm16892       | Gm16892       |              |  |  | 1.543960738 | 2.371601776 | 1.009803305 | 0.416292639 | 0.784830739 | 0.363810808 | 0.647152935 | 0.898071881 | 1.335667137 | 1.830051006 |
| ENSMUSG000000074482 | -0.12624555  | 1.713897142  | 0.017284158 | 0.895404127 | 0.999071534 | Gm16589       | Gm16589       |              |  |  | 6.316203019 | 5.039653775 | 2.01960661  | 1.110113705 | 2.681505025 | 8.513172898 | 7.053966989 | 0.552659619 | 0           | 0           |
| ENSMUSG000000020828 | -0.034385082 | 5.436734967  | 0.017278387 | 0.89542149  | 0.999071534 | Pld2          | Pld2          | PLD2         |  |  | 34.3180364  | 53.89465037 | 45.03722741 | 32.8871185  | 61.74001815 | 41.54719423 | 26.92156209 | 58.72008453 | 30.64177549 | 47.64668512 |
| ENSMUSG000000039449 | -0.032539106 | 4.708937405  | 0.017271074 | 0.895443496 | 0.999071534 | Prpf18        | Prpf18        | PRPF18       |  |  | 31.93191526 | 29.82289234 | 22.35031315 | 25.04694046 | 27.73068612 | 36.01726995 | 34.42853613 | 18.65226215 | 18.93504588 | 18.49658695 |
| ENSMUSG000000026275 | -0.028290863 | 5.186028612  | 0.017224676 | 0.895583229 | 0.999071534 | Ppp1r7        | Ppp1r7        | PPP1R7       |  |  | 39.30081878 | 36.52266735 | 40.79605353 | 33.78908589 | 40.0263677  | 50.8607509  | 34.94625848 | 25.9750021  | 24.43485174 | 40.91471178 |
| ENSMUSG000000044813 | -0.034287288 | 4.075913435  | 0.017188309 | 0.895692886 | 0.999071534 | Shb           | Shb           | SHB          |  |  | 16.35194782 | 18.85423412 | 18.71502126 | 15.33344555 | 18.77053518 | 21.61036197 | 14.94923279 | 20.310241   | 9.585375922 | 14.83648494 |
| ENSMUSG000000046580 | 0.131653388  | 1.355015178  | 0.017178853 | 0.895721417 | 0.999071534 | Gm7862        | Gm7862        |              |  |  | 5.54422265  | 3.557402664 | 1.548365068 | 0           | 1.504258917 | 3.856394561 | 7.571689337 | 1.381649048 | 0           | 0.130717929 |
| ENSMUSG000000063889 | -0.034735527 | 4.704900286  | 0.017098637 | 0.895963778 | 0.999071534 | Crem          | Crem          | CREM         |  |  | 33.96713623 | 31.48301358 | 23.36011646 | 27.26716787 | 20.20939153 | 21.61036197 | 33.39309144 | 18.44501479 | 17.44224143 | 32.87555915 |
| ENSMUSG000000029466 | 0.02926031   | 5.067110634  | 0.017083747 | 0.896008829 | 0.999071534 | Anapc7        | Anapc7        | ANAPC7       |  |  | 43.44144076 | 38.30136869 | 29.08233519 | 25.67137942 | 35.97140888 | 41.25614558 | 40.64120431 | 32.33058772 | 21.99922343 | 28.95402128 |
| ENSMUSG000000097080 | 0.057602054  | 2.365954609  | 0.017077091 | 0.896028973 | 0.999071534 | 1700086O06Rik | 1700086O06Rik |              |  |  | 3.649361744 | 1.837991377 | 7.539864678 | 5.82809695  | 6.605658721 | 4.729540499 | 4.530070544 | 4.214029596 | 4.792687961 | 6.209101628 |
| ENSMUSG000000051242 | 0.091061438  | 0.324138146  | 0.017069389 | 0.896052288 | 0.999071534 | Pcdhb9        | Pcdhb9        | PCDH84       |  |  | 0.491260235 | 0.770770577 | 1.817645949 | 1.595788451 | 0.915635862 | 0.509335131 | 0.388291761 | 1.72706131  | 1.257098482 | 1.503256184 |
| ENSMUSG000000023959 | -0.103881309 | 0.496485009  | 0.017058482 | 0.896085316 | 0.999071534 | Clic5         | Clic5         | CLIC5        |  |  | 0.842160403 | 2.786632087 | 1.88496617  | 0.346910533 | 0.981038424 | 1.600767553 | 2.588611739 | 0.483577167 | 0           | 1.503256184 |
| ENSMUSG000000037692 | -0.041972565 | 4.256468768  | 0.017009013 | 0.896235247 | 0.999071534 | Ahdc1         | Ahdc1         | AHDC1        |  |  | 16.56248792 | 17.84630337 | 23.09083558 | 22.61856673 | 19.42456079 | 19.8640701  | 7.765835218 | 15.54355179 | 24.51342039 | 20.32663796 |
| ENSMUSG000000026520 | 0.036999572  | 6.026156009  | 0.016941301 | 0.896440827 | 0.999071534 | Pycr2         | Pycr2         | PYCR2        |  |  | 84.14586022 | 44.64540344 | 67.65682144 | 68.27199284 | 68.54188455 | 101.4304532 | 90.53669558 | 28.80738265 | 39.44146486 | 68.4961948  |
| ENSMUSG000000035890 | -0.030124234 | 6.55205191   | 0.016921763 | 0.896500223 | 0.999071534 | Rnf126        | Rnf126        | RNF126       |  |  | 95.93610585 | 95.39768145 | 110.2705209 | 82.28717837 | 108.6336548 | 96.11881537 | 68.98650285 | 127.2498773 | 64.97627777 | 90.7836017  |
| ENSMUSG000000040734 | -0.04330361  | 4.0241839    | 0.016887088 | 0.896605727 | 0.999071534 | Ppp1r13l      | Ppp1r13l      | PPP1R13L     |  |  | 12.84294614 | 23.83459785 | 17.43593707 | 10.75422652 | 20.6018069  | 16.95358363 | 8.607134033 | 26.32041436 | 11.23531768 | 13.59466462 |
| ENSMUSG000000049878 | -0.041656653 | 5.011721722  | 0.016885898 | 0.896609348 | 0.999071534 | Rlf           | Rlf           | RLF          |  |  | 31.58101509 | 48.61783641 | 32.24638554 | 24.21435519 | 33.22450129 | 22.26522143 | 24.72124211 | 57.26935303 | 13.35667137 | 35.1631229  |
| ENSMUSG000000060733 | -0.028054999 | 5.666390358  | 0.016866581 | 0.896668171 | 0.999071534 | Ipmk          | Ipmk          | IPMK         |  |  | 45.75738187 | 61.00945569 | 48.94180019 | 50.09388093 | 59.97414898 | 65.84975618 | 54.42556182 | 54.64421984 | 26.55620542 | 46.27414687 |
| ENSMUSG000000058443 | -0.036593876 | 10.81091489  | 0.016839606 | 0.896750372 | 0.999071534 | Rpl10-ps3     | Rpl10-ps3     |              |  |  | 1939.425227 | 1537.035111 | 1756.451869 | 2010.415919 | 2192.620878 | 1260.3134   | 1736.570185 | 2286.421927 | 1229.599452 | 1961.880038 |
| ENSMUSG000000040751 | -0.053850153 | 4.81889049   | 0.016792709 | 0.896893437 | 0.999071534 | Lat2          | Lat2          | LAT2         |  |  | 56.494927   | 35.15899633 | 14.74312825 | 20.67586775 | 22.62928631 | 41.47443207 | 56.36702062 | 14.3691501  | 7.935434165 | 49.11161246 |
| ENSMUSG000000023262 | -0.040923374 | 3.60740574   | 0.016784601 | 0.896918192 | 0.999071534 | Acy1          | Acy1          | ABHD14A-ACY1 |  |  | 12.562226   | 10.49433786 | 13.19476319 | 12.41939707 | 14.84638148 | 18.19054038 | 13.39606575 | 8.566224097 | 5.028393926 | 14.37897219 |
| ENSMUSG000000049940 | -0.026953151 | 6.312635346  | 0.016761323 | 0.8969893   | 0.999071534 | Pgrmc2        | Pgrmc2        | PGRMC2       |  |  | 72.98723488 | 77.49208804 | 95.46007244 | 80.62200781 | 88.94748377 | 89.93403164 | 64.19757113 | 80.96463421 | 64.66200315 | 80.32616738 |
| ENSMUSG000000036218 | 0.134341163  | -0.434038705 | 0.016761256 | 0.896989504 | 0.999071534 | Pdzrn4        | Pdzrn4        | PDZRN4       |  |  | 0.280720134 | 0.059290044 | 1.279084186 | 0.763203172 | 0.654025616 | 0.582097292 | 0.970729402 | 0.069082452 | 1.335667137 | 0           |

|                     |              |              |             |             |             |               |               |               |             |             |             |             |             |             |             |             |             |             |
|---------------------|--------------|--------------|-------------|-------------|-------------|---------------|---------------|---------------|-------------|-------------|-------------|-------------|-------------|-------------|-------------|-------------|-------------|-------------|
| ENSMUSG00000041605  | -0.04059804  | 3.776194245  | 0.01672938  | 0.897086958 | 0.999071534 | 5730559C18Rik | 5730559C18Rik | C1orf106      | 13.68510654 | 14.34819075 | 19.859465   | 9.297202278 | 14.51936867 | 22.19245926 | 10.09558578 | 15.33630443 | 6.678335683 | 12.61428015 |
| ENSMUSG00000019947  | -0.064989396 | 3.10287555   | 0.016728685 | 0.897089081 | 0.999071534 | Arid5b        | Arid5b        | ARID5B        | 7.298723488 | 19.86216488 | 4.779735644 | 2.983430582 | 10.46440986 | 8.804221544 | 4.918362304 | 17.20153065 | 3.457020824 | 5.94766577  |
| ENSMUSG00000028412  | -0.028475965 | 5.66760647   | 0.016718801 | 0.897119319 | 0.999071534 | Slc44a1       | Slc44a1       | SLC44A1       | 46.59954227 | 67.88710085 | 53.92349649 | 43.36381659 | 54.61113893 | 57.4821076  | 66.00959935 | 48.97945875 | 34.09879631 | 38.23499424 |
| ENSMUSG00000026074  | -0.032947473 | 7.547959966  | 0.016686552 | 0.89721804  | 0.999071534 | Map4k4        | Map4k4        | MAP4K4        | 226.8920484 | 252.2198489 | 167.0887869 | 145.0086027 | 195.422854  | 281.9533759 | 170.9778054 | 175.7457589 | 117.4601394 | 170.3254615 |
| ENSMUSG00000021178  | -0.033964076 | 7.167096046  | 0.016671971 | 0.897262707 | 0.999071534 | Psmc1         | Psmc1         | PSMC1         | 170.1865813 | 148.2844011 | 143.7959907 | 134.1849941 | 159.2552375 | 196.8944091 | 212.6544544 | 92.98498092 | 93.49669957 | 105.031856  |
| ENSMUSG00000002803  | -0.058425695 | 2.250999302  | 0.016651913 | 0.897324184 | 0.999071534 | Btbd6         | Btbd6         | BTBD6         | 6.456563086 | 5.336103997 | 3.567971678 | 2.150845303 | 7.259684337 | 9.022508029 | 5.241938772 | 3.45412262  | 2.042785033 | 3.267948225 |
| ENSMUSG00000020585  | -0.035359636 | 9.312575948  | 0.016649729 | 0.897330881 | 0.999071534 | Laptm4a       | Laptm4a       | LAPTM4A       | 573.0199739 | 636.2414665 | 682.4250736 | 755.4323761 | 683.0643533 | 438.755834  | 656.9896594 | 706.1608284 | 552.7304886 | 618.687958  |
| ENSMUSG00000025939  | 0.02873211   | 5.310104431  | 0.016623618 | 0.897410973 | 0.999071534 | Ube2w         | Ube2w         | RP11-463D19.2 | 43.5116208  | 46.0683645  | 40.59409287 | 32.8871185  | 40.74579587 | 43.29348611 | 53.90783947 | 39.99873994 | 27.18475466 | 29.86904678 |
| ENSMUSG000000086240 | 0.140338145  | 1.4546646    | 0.016620111 | 0.897421736 | 0.999071534 | Gm7846        | Gm7846        |               | 8.211063924 | 0           | 2.086926831 | 0           | 2.812310149 | 5.602686437 | 4.335924663 | 3.315957715 | 0           | 0.915025503 |
| ENSMUSG00000028698  | -0.047454388 | 2.910356528  | 0.01661022  | 0.897452094 | 0.999071534 | Plk3r3        | Plk3r3        | PIK3R3        | 8.000523824 | 8.122736084 | 8.347707322 | 7.007592761 | 7.521294584 | 13.6065242  | 8.412988152 | 6.286503168 | 4.085570065 | 4.182973728 |
| ENSMUSG000000085178 | 0.117401143  | 0.079449448  | 0.016608695 | 0.897456775 | 0.999071534 | 1700064E03Rik | Kdm6bos       |               | 0           | 0.415030311 | 2.423527932 | 1.179495811 | 0.523220493 | 0.9459081   | 0.129430587 | 1.657978857 | 0.549980586 | 1.372538255 |
| ENSMUSG000000000247 | 0.067382588  | 1.995223385  | 0.016607464 | 0.897460555 | 0.999071534 | Lhx2          | Lhx2          | LHX2          | 3.649361744 | 1.067220799 | 3.366011017 | 6.591300122 | 4.708984435 | 4.220205368 | 2.265035272 | 3.039627905 | 6.049786443 | 2.875794438 |
| ENSMUSG000000004872 | -0.122739789 | -0.382461513 | 0.016602591 | 0.897475517 | 0.999071534 | Pax3          | Pax3          | PAX3          | 0.771980369 | 0           | 0.134640441 | 1.040731598 | 1.504258917 | 0.873145938 | 0.258861174 | 0.898071881 | 0.707117896 | 0.196076894 |
| ENSMUSG000000083382 | -0.068883209 | 1.301815603  | 0.016588539 | 0.897518675 | 0.999071534 | Gm6433        | Gm6433        |               | 2.807201342 | 1.837991377 | 2.356207712 | 2.775284262 | 2.616102464 | 1.309718907 | 3.753487022 | 1.657978857 | 2.907040239 | 0.980384468 |
| ENSMUSG000000000532 | -0.037532001 | 4.952310754  | 0.016587618 | 0.897521504 | 0.999071534 | Acvr1b        | Acvr1b        | ACVR1B        | 20.98383003 | 45.83120433 | 34.13135171 | 26.15705417 | 35.31738326 | 34.4165024  | 28.41001384 | 46.63065537 | 12.57098482 | 27.58148302 |
| ENSMUSG000000066116 | 0.148551702  | 1.901727851  | 0.01657762  | 0.897552222 | 0.999071534 | Gm10154       | Gm10154       |               | 11.01826527 | 3.49811262  | 0           | 0           | 3.793348573 | 3.929156722 | 3.818022315 | 0.621742072 | 8.721120716 | 0           |
| ENSMUSG000000032185 | 0.030016693  | 5.542033322  | 0.016565937 | 0.897588129 | 0.999071534 | Carm1         | Carm1         | CARM1         | 45.47666174 | 42.57025188 | 53.72153583 | 39.82532916 | 57.61965677 | 62.2116481  | 26.66270091 | 52.36449891 | 42.11279913 | 44.11730104 |
| ENSMUSG000000022519 | -0.080574361 | 0.58861029   | 0.016556783 | 0.897616272 | 0.999071534 | Srl           | Srl           | SRL           | 1.894860906 | 1.422961066 | 1.211763966 | 1.040731598 | 1.765869163 | 3.783632399 | 0.711868228 | 0.690824524 | 1.021392516 | 0.653589645 |
| ENSMUSG000000075271 | 0.078921865  | 1.485468233  | 0.016552743 | 0.897628695 | 0.999071534 | Ttc30a1       | Ttc30a1       | TTC30A        | 3.579181711 | 2.134441599 | 3.366011017 | 2.150845303 | 2.223687094 | 4.220205368 | 5.177223478 | 1.72706131  | 0.078568655 | 2.745076509 |
| ENSMUSG000000026975 | 0.044846722  | 2.824113477  | 0.016546543 | 0.897647763 | 0.999071534 | Dph7          | Dph7          | DPH7          | 6.105662918 | 8.004155995 | 5.654898509 | 7.423885401 | 8.306125323 | 8.367648575 | 6.600959935 | 6.493750525 | 4.32127603  | 8.758101244 |
| ENSMUSG000000067787 | 0.028012463  | 5.376370759  | 0.016517065 | 0.897738475 | 0.999071534 | Bicap         | Bicap         | BLCAP         | 43.932701   | 35.45544656 | 46.45095204 | 41.21297129 | 45.78179312 | 40.89233478 | 33.13423026 | 38.82433825 | 36.77013059 | 50.78391542 |
| ENSMUSG00000028070  | -0.030175897 | 6.178698775  | 0.016471894 | 0.897877634 | 0.999071534 | Apoa1bp       | Apoa1bp       | NAXE          | 83.02297968 | 70.43657276 | 83.81367433 | 72.85121188 | 68.99970248 | 48.89617254 | 76.23461572 | 83.79701475 | 60.65500174 | 69.54193823 |
| ENSMUSG000000034156 | -0.0621335   | 2.056799553  | 0.016471285 | 0.897879513 | 0.999071534 | Bzap1         | Bzap1         | TSPOAP1       | 4.842422314 | 2.845922132 | 2.154247051 | 7.562649614 | 4.656778337 | 1.747312924 | 3.523205072 | 3.221314859 | 5.94766577  |             |
| ENSMUSG000000037331 | 0.044254375  | 8.21664303   | 0.016446889 | 0.897954752 | 0.999071534 | Larp1         | Larp1         | LARP1         | 241.7702156 | 200.22248   | 439.3990782 | 323.1124702 | 309.8119343 | 383.5293534 | 115.5815142 | 236.9528117 | 337.6880796 | 371.7617901 |
| ENSMUSG000000037938 | -0.032975443 | 4.191464335  | 0.016436947 | 0.897985433 | 0.999071534 | Chchd5        | Chchd5        | CHCHD5        | 16.91338808 | 19.92145492 | 17.77253817 | 18.52502245 | 22.10606582 | 15.86215121 | 15.20809397 | 20.65565327 | 14.92804447 | 19.08481764 |
| ENSMUSG000000032437 | -0.031909555 | 7.233707303  | 0.016436732 | 0.897986096 | 0.999071534 | Stt3b         | Stt3b         | STT3B         | 168.3619005 | 193.0483846 | 122.9267223 | 138.694831  | 168.4115961 | 192.6742037 | 192.9810052 | 132.5692261 | 91.76818915 | 122.2866226 |
| ENSMUSG000000027984 | 0.027378307  | 6.189598138  | 0.016423505 | 0.898026927 | 0.999071534 | Hadh          | Hadh          | HADH          | 80.84739864 | 66.76059    | 69.07054607 | 72.36553713 | 85.93896594 | 76.10922095 | 89.11295912 | 59.75632132 | 64.26915987 | 64.70537486 |
| ENSMUSG000000029179 | 0.036815213  | 4.165290979  | 0.016418077 | 0.898043686 | 0.999071534 | Zcchc4        | Zcchc4        | ZCCHC4        | 15.86068758 | 13.93316044 | 22.28299293 | 21.36968882 | 17.39708138 | 15.86215121 | 12.10175988 | 23.14262155 | 15.16375043 | 19.80376624 |
| ENSMUSG000000074282 | 0.075009673  | 0.827639386  | 0.01640145  | 0.898095043 | 0.999071534 | Zfp94         | Zfp94         | ZNF45         | 1.263240604 | 1.660121243 | 2.625488593 | 0.346910533 | 2.485297341 | 1.600767553 | 1.48845175  | 1.796143762 | 1.649941757 | 1.503256184 |
| ENSMUSG000000061838 | 0.025360217  | 5.761662394  | 0.016359856 | 0.898223637 | 0.999071534 | Suc1g2        | Suc1g2        | SUCLG2        | 56.84582717 | 52.05665899 | 59.03983324 | 52.86916519 | 57.75046189 | 73.34425881 | 55.46100651 | 41.7948837  | 45.88409458 | 49.86888992 |
| ENSMUSG000000003308 | -0.029421585 | 4.80668313   | 0.0163514   | 0.898249802 | 0.999071534 | Keap1         | Keap1         | KEAP1         | 27.72111325 | 33.61745518 | 30.36141937 | 22.34103831 | 32.50507311 | 35.50793482 | 20.64417862 | 30.53444396 | 22.3920667  | 24.96712444 |
| ENSMUSG000000025234 | 0.02751387   | 6.095912982  | 0.016343153 | 0.898275323 | 0.999071534 | Arih1         | Arih1         | ARIH1         | 70.25021358 | 90.59518785 | 62.2038836  | 56.06074209 | 73.0546613  | 88.04221544 | 60.83237587 | 75.09262575 | 56.01945108 | 55.03224811 |
| ENSMUSG000000090799 | -0.112718346 | 0.386966916  | 0.016290352 | 0.89843889  | 0.999071534 | Klh13         | Klh13         | KLHL33        | 2.315941107 | 1.007930755 | 0.403921322 | 1.040731598 | 1.569661478 | 0.9459081   | 0.129430587 | 0.759906976 | 0           | 3.725460977 |
| ENSMUSG000000029125 | 0.048897257  | 4.130896134  | 0.016262746 | 0.898524513 | 0.999071534 | Stx18         | Stx18         | STX18         | 25.54553221 | 26.14690958 | 11.17515658 | 12.28063286 | 14.1269533  | 27.35857273 | 33.58723732 | 9.53337843  | 7.935434165 | 10.45743432 |
| ENSMUSG000000098120 | -0.117795976 | -0.468132205 | 0.016231646 | 0.898621065 | 0.999071534 | Gm5914        | Gm5914        |               | 0.631620302 | 0.059290044 | 1.88496617  | 0.416292639 | 0.196207685 | 0.291048646 | 0.19414588  | 0.759906976 | 0.392843275 | 1.045743432 |
| ENSMUSG000000026819 | -0.048182687 | 3.089830494  | 0.01621385  | 0.898676356 | 0.999071534 | Slc25a25      | Slc25a25      | SLC25A25      | 11.01826527 | 9.723567283 | 6.664701814 | 6.730064335 | 10.33360473 | 17.24463228 | 7.312828163 | 4.62852431  | 4.085570065 | 8.758101244 |
| ENSMUSG00000020021  | -0.035683887 | 4.3086472    | 0.016205861 | 0.898701184 | 0.999071534 | Fgd6          | Fgd6          | FGD6          | 18.73806896 | 24.4274983  | 17.77253817 | 16.51294136 | 26.35723232 | 17.60844309 | 12.16647517 | 26.45857927 | 17.59937874 | 18.69266385 |
| ENSMUSG000000050105 | 0.064694685  | 1.908129975  | 0.016196291 | 0.898730939 | 0.999071534 | Grrp1         | Grrp1         | FAM110D       | 5.474042616 | 2.134441599 | 3.769932339 | 3.607869541 | 3.400933203 | 7.64002696  | 3.17104938  | 0.828989429 | 2.671334273 | 4.379050622 |
| ENSMUSG000000093674 | 0.046440622  | 11.50183886  | 0.016117646 | 0.898975784 | 0.999071534 | Rpl41         | Rpl41         | AC090498.1    | 5547.240391 | 2583.267235 | 1846.324363 | 2806.50621  | 2069.860269 | 2575.343945 | 5621.105676 | 1827.990773 | 1867.969775 | 2416.255559 |

|                     |              |              |             |             |             |          |          |          |             |             |             |             |             |             |             |             |             |             |
|---------------------|--------------|--------------|-------------|-------------|-------------|----------|----------|----------|-------------|-------------|-------------|-------------|-------------|-------------|-------------|-------------|-------------|-------------|
| ENSMUSG00000057143  | -0.034618276 | 5.417228342  | 0.016101208 | 0.899027039 | 0.999071534 | Trim12c  | Trim12c  | TRIM5    | 42.10802013 | 38.12349855 | 44.36402521 | 55.71383156 | 42.31545735 | 31.14220513 | 24.20351976 | 46.1470782  | 46.59121247 | 49.08458234 |
| ENSMUSG00000019320  | -0.06556106  | 1.479479416  | 0.016097768 | 0.899037768 | 0.999071534 | Noxo1    | Noxo1    | NOXO1    | 3.158101509 | 2.786632087 | 2.356207712 | 3.81601586  | 1.896674286 | 1.236956746 | 1.553167044 | 4.006782239 | 1.807079067 | 3.660102012 |
| ENSMUSG00000003810  | 0.030335255  | 5.959282307  | 0.016091401 | 0.899057629 | 0.999071534 | Mast2    | Mast2    | MAST2    | 58.03888774 | 59.9422349  | 72.84047841 | 54.39557153 | 74.23190741 | 79.09246957 | 33.00479967 | 67.56263844 | 56.09801974 | 67.5811693  |
| ENSMUSG000000020745 | -0.030887052 | 7.671130002  | 0.016067146 | 0.899133327 | 0.999071534 | Pafah1b1 | Pafah1b1 | PAFAH1B1 | 200.0832756 | 265.0264985 | 192.0645886 | 184.9726961 | 228.9089656 | 284.2817651 | 183.01485   | 187.0061986 | 146.5305418 | 189.2142022 |
| ENSMUSG00000027750  | -0.056087807 | 7.206115241  | 0.016011039 | 0.899308656 | 0.999071534 | Postn    | Postn    | POSTN    | 94.67286525 | 226.2508095 | 256.6920002 | 99.97961554 | 103.9900729 | 290.2482623 | 276.3990185 | 68.32254542 | 41.01283796 | 70.78375856 |
| ENSMUSG00000001700  | -0.04254981  | 3.140532195  | 0.016002715 | 0.899334694 | 0.999071534 | Gramd3   | Gramd3   | GRAMD3   | 7.368903522 | 11.20581839 | 11.17515658 | 7.63203172  | 8.371527884 | 10.62327558 | 6.536244641 | 10.0169556  | 7.6997282   | 6.470537486 |
| ENSMUSG000000002831 | -0.115768352 | -0.157350279 | 0.015996242 | 0.899354947 | 0.999071534 | Plin4    | Plin4    | PLIN4    | 0.842160403 | 1.48225111  | 0.875162864 | 0.069382107 | 0.850233301 | 1.382481069 | 0.258861174 | 1.657978857 | 0           | 0.392153787 |
| ENSMUSG00000043300  | 0.090068433  | 1.524739749  | 0.015919392 | 0.899595718 | 0.999071534 | B3galnt1 | B3galnt1 | B3GALNT1 | 6.175842952 | 1.956571465 | 1.009803305 | 1.595788451 | 3.204725518 | 4.584016176 | 7.24811287  | 0.27632981  | 1.571373102 | 0.522871716 |
| ENSMUSG00000062963  | -0.02944764  | 6.796166875  | 0.015898883 | 0.89966007  | 0.999071534 | Ufc1     | Ufc1     | UFC1     | 139.5179067 | 116.7420974 | 92.83458385 | 121.0717759 | 111.9037829 | 107.3241882 | 140.6263327 | 110.8082536 | 67.17620011 | 108.1690863 |
| ENSMUSG00000040548  | -0.029102944 | 4.89436526   | 0.015890092 | 0.899687669 | 0.999071534 | Tex2     | Tex2     | TEX2     | 35.09001677 | 38.41994878 | 24.84116131 | 21.30030671 | 36.56003193 | 31.21496729 | 30.7397644  | 27.77114586 | 21.76351746 | 30.52263642 |
| ENSMUSG00000054893  | -0.064115562 | 1.485305284  | 0.015866361 | 0.899762206 | 0.999071534 | Zfp667   | Zfp667   | ZNF667   | 3.087921476 | 2.312311732 | 3.971893    | 2.081463196 | 2.746907587 | 1.746291877 | 2.394465859 | 2.970545453 | 3.771295445 | 1.176461361 |
| ENSMUSG00000029512  | -0.032978523 | 5.148823552  | 0.015854902 | 0.89979822  | 0.999071534 | Ulk1     | Ulk1     | ULK1     | 35.58127701 | 36.5819574  | 33.39082929 | 40.51915022 | 39.1761344  | 36.38108076 | 17.27898336 | 48.15046932 | 28.12757853 | 37.97355838 |
| ENSMUSG00000038279  | 0.031832834  | 5.762773818  | 0.015834561 | 0.899862179 | 0.999071534 | Nop2     | Nop2     | NOP2     | 60.28464881 | 46.30552468 | 60.85747919 | 51.68966938 | 59.18931824 | 106.5965666 | 50.80150538 | 28.94554755 | 38.10579772 | 51.24142817 |
| ENSMUSG00000056536  | 0.027562664  | 5.45462538   | 0.015827727 | 0.899883675 | 0.999071534 | Pign     | Pign     | PIGN     | 38.66919848 | 52.17523908 | 43.55618256 | 40.72729654 | 49.96755706 | 54.20781033 | 53.26068653 | 46.69973782 | 25.6138156  | 37.05853287 |
| ENSMUSG00000029386  | 0.04060007   | 3.522428905  | 0.01581805  | 0.899914126 | 0.999071534 | Tctn2    | Tctn2    |          | 10.0357448  | 15.05967128 | 6.732022034 | 11.58681179 | 14.78097892 | 10.18670261 | 12.8783434  | 10.36236786 | 9.663944577 | 12.09140843 |
| ENSMUSG00000027593  | -0.032380503 | 8.180900182  | 0.015789271 | 0.900004734 | 0.999071534 | Raly     | Raly     | RALY     | 324.8633753 | 287.3195552 | 313.0390246 | 260.6685743 | 340.4857357 | 363.8108076 | 360.5936153 | 256.848558  | 171.75108   | 259.0829353 |
| ENSMUSG00000042213  | -0.041064608 | 3.637032291  | 0.015756452 | 0.900108166 | 0.999071534 | Zfand4   | Zfand4   | ZFAND4   | 10.2462849  | 7.826285862 | 18.17645949 | 12.83568971 | 15.63121222 | 13.31547556 | 17.73199041 | 10.56961522 | 7.935434165 | 9.607767782 |
| ENSMUSG00000022248  | 0.045114478  | 3.798648385  | 0.015734744 | 0.900176643 | 0.999071534 | Rad1     | Rad1     | RAD1     | 19.79076946 | 14.94109119 | 13.59868451 | 9.019673851 | 13.53833025 | 21.68312413 | 23.16807507 | 5.526596192 | 7.85686551  | 11.76461361 |
| ENSMUSG00000002319  | -0.02862804  | 6.236901264  | 0.015716108 | 0.900235466 | 0.999071534 | Ipo4     | Ipo4     | IPO4     | 93.47980468 | 83.59896261 | 84.08295521 | 53.14669362 | 82.53803273 | 114.2365936 | 51.44865832 | 70.32593654 | 55.15519588 | 76.33927054 |
| ENSMUSG00000030660  | 0.025682277  | 5.764118902  | 0.015714081 | 0.900241864 | 0.999071534 | Pik3c2a  | Pik3c2a  | PIK3C2A  | 58.17924781 | 59.82365481 | 57.89538949 | 49.26129565 | 54.153321   | 67.01395076 | 66.33317582 | 54.50605494 | 38.02722907 | 41.37222453 |
| ENSMUSG00000030990  | 0.031874482  | 4.1749871    | 0.015709374 | 0.900256728 | 0.999071534 | Pgap2    | Pgap2    | PGAP2    | 16.91338808 | 18.43920381 | 22.21567271 | 13.04383603 | 21.77905301 | 19.06368632 | 18.57328923 | 17.89235517 | 15.16375043 | 16.66653595 |
| ENSMUSG00000020458  | 0.031214935  | 9.386934555  | 0.015664202 | 0.900399488 | 0.999071534 | Rtn4     | Rtn4     | RTN4     | 618.2860955 | 604.2248426 | 747.321766  | 755.362994  | 702.6851218 | 765.0213662 | 724.5524258 | 589.6878136 | 510.6962581 | 696.4651258 |
| ENSMUSG00000074221  | 0.051483823  | 3.09098295   | 0.015649507 | 0.900445974 | 0.999071534 | Zfp568   | Zfp568   |          | 6.667103186 | 9.54569715  | 5.99149961  | 11.30928337 | 9.0255535   | 18.11777822 | 5.630230533 | 9.187966168 | 6.67835683  | 3.267948225 |
| ENSMUSG00000037933  | 0.029108233  | 6.686211802  | 0.015624897 | 0.900523875 | 0.999071534 | Bicd2    | Bicd2    | BICD2    | 80.77721861 | 126.2877946 | 119.0894698 | 84.85431631 | 118.6402467 | 140.7947825 | 78.75851216 | 117.4401691 | 81.78996996 | 88.10388415 |
| ENSMUSG00000079605  | 0.045801398  | 2.969850767  | 0.015595787 | 0.900616104 | 0.999071534 | Zbtb9    | Zbtb9    | ZBTB9    | 5.54422265  | 9.130666839 | 8.953589305 | 6.591300122 | 9.156358623 | 9.968416129 | 7.377543457 | 4.835771668 | 9.506807267 | 5.751588876 |
| ENSMUSG00000019139  | 0.037627739  | 3.799020969  | 0.015548281 | 0.9007668   | 0.999071534 | Isyna1   | Isyna1   | ISYNA1   | 18.52752886 | 10.49433786 | 13.80064517 | 14.01518552 | 13.86534306 | 25.46675653 | 12.36062105 | 10.91502748 | 8.17114013  | 13.26786979 |
| ENSMUSG00000039865  | 0.087688107  | 0.391947501  | 0.01554205  | 0.900786582 | 0.999071534 | Slc44a3  | Slc44a3  | SLC44A3  | 1.754500839 | 0.889350666 | 1.817645949 | 0.346910533 | 1.177246109 | 0.727621615 | 0.453007054 | 0.828989429 | 0.785686551 | 3.006512367 |
| ENSMUSG00000040464  | 0.032645743  | 4.650952134  | 0.015541229 | 0.900789189 | 0.999071534 | Gtbp10   | Gtbp10   | GTPBP10  | 26.80877281 | 19.15068434 | 28.54377342 | 29.00172054 | 24.39515548 | 26.33990247 | 38.31145374 | 23.0735391  | 15.24231909 | 20.32663796 |
| ENSMUSG00000022685  | 0.029638447  | 5.045227971  | 0.015521255 | 0.900852635 | 0.999071534 | Parn     | Parn     | PARN     | 38.10775821 | 45.71262424 | 30.36141937 | 23.93682676 | 31.65483981 | 38.49118345 | 43.10038546 | 32.53783508 | 21.92065477 | 26.20894477 |
| ENSMUSG00000032850  | 0.067992065  | 1.167756518  | 0.01551945  | 0.90085837  | 0.999071534 | Rnft2    | Rnft2    | RNFT2    | 1.965040939 | 2.668051998 | 1.144443746 | 2.567137942 | 2.354492217 | 1.309718907 | 0.970729402 | 3.385040167 | 2.357059653 | 2.091486864 |
| ENSMUSG00000078606  | 0.198775043  | 3.642763846  | 0.015506351 | 0.900900004 | 0.999071534 | Gm4070   | Gm4070   |          | 0           | 34.86254611 | 25.24508263 | 0           | 0           | 32.45192404 | 0           | 0           | 16.4204892  | 17.18940766 |
| ENSMUSG00000028447  | -0.034697059 | 5.517834754  | 0.015488006 | 0.90095834  | 0.999071534 | Dctn3    | Dctn3    | DCTN3    | 61.05662918 | 49.8036373  | 32.91958775 | 44.95960504 | 51.92963391 | 43.00243746 | 80.44110979 | 39.16975051 | 23.02061594 | 35.09776394 |
| ENSMUSG00000002808  | 0.031833467  | 4.248463368  | 0.015463466 | 0.901036431 | 0.999071534 | Epdr1    | Epdr1    | EPDR1    | 22.1768906  | 18.26133368 | 17.50325729 | 17.55367296 | 21.64824789 | 21.68312413 | 24.13880447 | 17.20153065 | 10.52819978 | 20.0652021  |
| ENSMUSG000000094530 | 0.144507969  | -0.562726758 | 0.015463082 | 0.901037651 | 0.999071534 | Gm21399  | Gm21399  |          | 1.824680872 | 0.415030311 | 0           | 0           | 0.457817931 | 1.528005392 | 0.776583522 | 0.414494714 | 0           | 0.261435858 |
| ENSMUSG00000033991  | -0.051231413 | 3.964399746  | 0.015419337 | 0.901177016 | 0.999071534 | Ttc37    | Ttc37    | TTC37    | 21.61545033 | 29.05212176 | 7.337904017 | 8.533999106 | 16.02362759 | 33.54335646 | 19.02629628 | 8.220811835 | 7.6997282   | 9.477049853 |
| ENSMUSG00000063873  | -0.053859294 | 1.915582199  | 0.015418421 | 0.901179935 | 0.999071534 | Slc24a3  | Slc24a3  | SLC24A3  | 2.526481208 | 5.632554219 | 4.241173882 | 3.052812688 | 3.793348573 | 5.675448599 | 3.624056435 | 2.279720929 | 2.514196963 | 3.594743048 |
| ENSMUSG00000058498  | 0.067323779  | 1.208816532  | 0.015414604 | 0.901192104 | 0.999071534 | Rnf207   | Rnf207   | RNF207   | 2.807201342 | 1.304380977 | 2.221567271 | 3.330341114 | 1.308051232 | 1.819054038 | 1.035444696 | 2.072473572 | 2.199922343 | 3.464025119 |
| ENSMUSG00000048520  | 0.075712109  | 1.019039704  | 0.015397548 | 0.901246504 | 0.999071534 | Fbxl13   | Fbxl13   | FBXL13   | 2.877381375 | 1.660121243 | 1.144443746 | 2.289609516 | 1.63506404  | 0.436572969 | 1.812028217 | 1.312566595 | 3.378452169 | 1.830051006 |
| ENSMUSG00000006678  | 0.031829967  | 5.715403325  | 0.015381798 | 0.901296766 | 0.999071534 | Pola1    | Pola1    | POLA1    | 60.42500888 | 41.02871073 | 50.15356415 | 55.02001049 | 62.52484889 | 87.96945328 | 69.31007932 | 34.61030865 | 39.75573948 | 31.50302089 |

|                      |              |              |             |             |             |               |               |                |             |             |             |             |             |             |              |             |             |              |
|----------------------|--------------|--------------|-------------|-------------|-------------|---------------|---------------|----------------|-------------|-------------|-------------|-------------|-------------|-------------|--------------|-------------|-------------|--------------|
| ENSMUSG00000028245   | 0.028080493  | 4.746254649  | 0.015370473 | 0.901332922 | 0.999071534 | Nsmaf         | Nsmaf         | NSMAF          | 34.87947667 | 23.3602775  | 28.40913298 | 23.52053412 | 27.46907587 | 35.65345915 | 26.53327033  | 21.55372515 | 20.89926226 | 27.18932923  |
| ENSMUSG000000031647  | -0.090520899 | 0.23117333   | 0.015363483 | 0.901355245 | 0.999071534 | Mfap3l        | Mfap3l        | MFAP3L         | 0.912340436 | 1.126510844 | 1.817645949 | 0.555056852 | 1.177246109 | 1.382481069 | 1.68259763   | 0.069082452 | 1.099961171 | 0.653589645  |
| ENSMUSG000000091408  | 0.086736528  | 0.725657523  | 0.015358119 | 0.90137238  | 0.999071534 | Gm6728        | Gm6728        |                | 3.930081878 | 0.948640711 | 0.740522424 | 0.624438959 | 1.504258917 | 2.328389169 | 3.494625848  | 0.414494714 | 0.785686551 | 0.784307574  |
| ENSMUSG000000040855  | -0.085586659 | 0.69878325   | 0.015320505 | 0.901492614 | 0.999071534 | Reps2         | Reps2         | REPS2          | 1.965040939 | 1.660121243 | 1.615658288 | 1.595788451 | 1.111843547 | 2.182864846 | 3.106334087  | 0.27632981  | 1.335667137 | 0.196076894  |
| ENSMUSG000000026342  | 0.029500124  | 5.359319356  | 0.015308072 | 0.901532388 | 0.999071534 | Slc35f5       | Slc35f5       | SLC35F5        | 41.33603976 | 54.84329108 | 31.23658224 | 39.47841863 | 43.68891115 | 43.00243746 | 49.70134539  | 43.2456152  | 20.58498764 | 45.94735205  |
| ENSMUSG000000052563  | -0.056109995 | 2.044896468  | 0.015284932 | 0.90160646  | 0.999071534 | D930048N14Rik | D930048N14Rik |                | 4.421342113 | 2.371601776 | 5.385617627 | 5.550568524 | 3.27012808  | 4.438491853 | 2.070889391  | 3.108710358 | 3.299883514 | 6.013024734  |
| ENSMUSG000000028405  | -0.028484163 | 5.044505752  | 0.015269252 | 0.901656686 | 0.999071534 | Aco1          | Aco1          | ACO1           | 36.49361744 | 39.42787953 | 26.92808814 | 29.6955416  | 40.3533805  | 53.6984752  | 31.64577851  | 26.87307398 | 23.25632191 | 26.07822684  |
| ENSMUSG000000020038  | -0.029850444 | 4.981097113  | 0.015249029 | 0.901721501 | 0.999071534 | Cry1          | Cry1          | CRY1           | 29.82651426 | 27.80703083 | 37.09344141 | 30.04245214 | 40.3533805  | 31.14220513 | 40.511777372 | 34.26489639 | 23.72773384 | 20.522771485 |
| ENSMUSG000000005683  | -0.029404435 | 7.586660592  | 0.015246745 | 0.901728823 | 0.999071534 | Cs            | Cs            | CS             | 205.6274983 | 190.6174928 | 202.1626217 | 174.0103232 | 237.4112986 | 253.8671816 | 197.5110757  | 157.7843213 | 146.0591298 | 175.1620249  |
| ENSMUSG000000030287  | 0.045944427  | 4.952376853  | 0.015245593 | 0.901732516 | 0.999071534 | Itpr2         | Itpr2         | ITPR2          | 18.38716879 | 22.47092683 | 38.97840758 | 45.16775136 | 30.93541163 | 20.44616739 | 10.48387754  | 32.46875263 | 37.63438579 | 44.44409586  |
| ENSMUSG000000014601  | -0.024752098 | 5.561953251  | 0.015236577 | 0.90176143  | 0.999071534 | Strip1        | Strip1        | STRIP1         | 53.96844579 | 53.30174992 | 49.61500239 | 40.38038601 | 50.03295962 | 53.3346644  | 38.18202315  | 48.63404649 | 37.08440521 | 48.88850545  |
| ENSMUSG000000034403  | -0.025372016 | 6.362224133  | 0.015231245 | 0.901778535 | 0.999071534 | Pja1          | Pja1          | PJA1           | 72.84687482 | 94.74549096 | 87.71824711 | 76.73660984 | 98.62706289 | 100.1207343 | 81.08826273  | 79.92839742 | 64.89770911 | 69.67265616  |
| ENSMUSG000000000253  | 0.055116701  | 2.482105545  | 0.015198328 | 0.90188419  | 0.999071534 | Gmpr          | Gmpr          | GMPR           | 7.93034379  | 2.608761954 | 5.587578288 | 4.579219032 | 7.194281776 | 10.47775126 | 7.959881098  | 2.763298096 | 3.142746204 | 3.725460977  |
| ENSMUSG000000029064  | -0.030278293 | 8.765093766  | 0.015190864 | 0.901908165 | 0.999071534 | Gnb1          | Gnb1          | GNB1           | 445.3624929 | 514.044685  | 439.1297973 | 418.7903951 | 466.5164719 | 498.8573794 | 419.1609559  | 434.6667905 | 363.3014612 | 364.4415861  |
| ENSMUSG000000051790  | 0.037761648  | 5.716097308  | 0.015181749 | 0.901937448 | 0.999071534 | Nlgn2         | Nlgn2         | NLGN2          | 39.44117885 | 63.0253172  | 58.9051928  | 52.17534412 | 54.80734662 | 44.89425366 | 21.03247038  | 81.24096402 | 36.37728731 | 71.04519442  |
| ENSMUSG000000026200  | 0.048873602  | 2.61305734   | 0.015132359 | 0.902096286 | 0.999071534 | Glb1l         | Glb1l         | GLB1L          | 4.491522147 | 5.276813952 | 6.193460271 | 8.464616999 | 5.886230544 | 6.330308052 | 3.235764674  | 5.664761096 | 7.149747614 | 6.470537486  |
| ENSMUSG000000022983  | 0.035348849  | 3.994834101  | 0.01509564  | 0.902214542 | 0.999071534 | Scaf4         | Scaf4         | SCAF4          | 16.98356812 | 18.97281421 | 17.63789773 | 8.950291745 | 19.09754799 | 22.77455656 | 12.42533635  | 18.16868498 | 11.47102364 | 13.72538255  |
| ENSMUSG000000084276  | -0.072379512 | 0.871769021  | 0.015070819 | 0.902294567 | 0.999071534 | Gm8317        | Gm8317        |                | 2.105401006 | 1.245090933 | 1.413724627 | 2.705902155 | 1.504258917 | 0.800383777 | 1.164875283  | 1.036236786 | 1.414235792 | 3.398666154  |
| ENSMUSG000000069114  | 0.046717871  | 3.227051698  | 0.015050173 | 0.902361177 | 0.999071534 | Zbtb10        | Zbtb10        | ZBTB10         | 7.088183388 | 8.419186306 | 11.71371834 | 9.435966491 | 10.39900729 | 5.602686437 | 5.500799946  | 14.92180972 | 8.642552061 | 9.346331924  |
| ENSMUSG000000021185  | 0.051253875  | 2.414370097  | 0.015041365 | 0.902389611 | 0.999071534 | 9030617O03Rik | 9030617O03Rik | C14orf159      | 4.56170218  | 4.921073686 | 4.039213221 | 6.730064335 | 6.14784079  | 6.548594537 | 5.500799946  | 3.246875263 | 2.78490998  | 8.627383315  |
| ENSMUSG000000038253  | 0.046700923  | 3.37135675   | 0.015041093 | 0.902390489 | 0.999071534 | Hoxa5         | Hoxa5         | HOXA5          | 8.702324159 | 5.573264174 | 14.13724627 | 12.21125075 | 11.31464316 | 9.459080998 | 4.788931717  | 10.36236786 | 9.742513232 | 15.0979208   |
| ENSMUSG000000027652  | 0.028275471  | 4.976691139  | 0.015021323 | 0.902454338 | 0.999071534 | Ralgapb       | Ralgapb       | RALGAPB        | 30.66867466 | 40.73226051 | 31.84246422 | 22.89609516 | 35.77520119 | 49.04169687 | 28.99245148  | 31.15618603 | 21.5278115  | 25.94750891  |
| ENSMUSG000000021884  | -0.056471841 | 2.218663479  | 0.015008919 | 0.902494419 | 0.999071534 | Hac1l         | Hac1l         | HACL1          | 6.667103186 | 5.395394041 | 4.577774983 | 2.567137942 | 4.90519212  | 3.929156722 | 7.765835218  | 4.697606763 | 3.299883514 | 1.633974113  |
| ENSMUSG000000031928  | 0.029822289  | 4.387487041  | 0.014990013 | 0.902555542 | 0.999071534 | Mre11a        | Mre11a        | MRE11A         | 20.77328993 | 20.57364541 | 22.35031315 | 21.09216039 | 22.04066326 | 31.86982675 | 23.94465859  | 18.03052007 | 14.06378926 | 16.07830527  |
| ENSMUSG000000053347  | 0.035808857  | 3.878097199  | 0.014975231 | 0.902603362 | 0.999071534 | Zfp943        | Zfp943        |                | 14.52726694 | 12.92522968 | 14.06992605 | 18.52052245 | 14.32316099 | 12.51509178 | 21.16190097  | 12.29667653 | 11.62816095 | 13.20251083  |
| ENSMUSG0000000010461 | -0.067415345 | 2.307570098  | 0.014948514 | 0.902689851 | 0.999071534 | Eya4          | Eya4          | EYA4           | 4.491522147 | 9.189956883 | 0.538561763 | 3.469105327 | 8.109917638 | 4.29296753  | 6.600959935  | 5.319348834 | 3.8498641   | 2.483640651  |
| ENSMUSG000000028821  | 0.026237271  | 5.492644022  | 0.014927188 | 0.902758944 | 0.999071534 | Syf2          | Syf2          | SYF2           | 36.91469764 | 47.55061561 | 55.40454134 | 41.21297129 | 49.9021545  | 51.4428482  | 35.85227259  | 46.07799575 | 35.04162017 | 51.11071024  |
| ENSMUSG000000079429  | 0.056489554  | 1.829877341  | 0.01492441  | 0.902767947 | 0.999071534 | Mroh2a        | Mroh2a        | MROH2A         | 3.158101509 | 2.96450222  | 5.183656966 | 2.358991623 | 3.793348573 | 4.656778337 | 2.394465859  | 3.661369977 | 1.414235792 | 5.163358196  |
| ENSMUSG000000023047  | -0.101827037 | 0.757649993  | 0.014904808 | 0.902831504 | 0.999071534 | Amhr2         | Amhr2         | AMHR2          | 0           | 3.142372354 | 0.605881983 | 2.150845303 | 2.419894779 | 0.291048646 | 0.647152935  | 1.934308667 | 1.178529826 | 2.941153403  |
| ENSMUSG000000081769  | -0.064627688 | 1.965692667  | 0.014868639 | 0.902948891 | 0.999071534 | Gm12216       | Gm12216       |                | 3.859901845 | 1.600831199 | 6.933982695 | 3.330341114 | 4.316569065 | 2.037340523 | 1.29430587   | 4.421276953 | 3.535589479 | 6.013024734  |
| ENSMUSG000000040451  | 0.030847169  | 4.845103602  | 0.014860586 | 0.902975046 | 0.999071534 | Sgms1         | Sgms1         | SGMS1          | 27.93165335 | 34.68467598 | 26.38952637 | 30.38936267 | 27.33827075 | 32.30639972 | 34.36382084  | 32.39967017 | 24.90626367 | 15.42471562  |
| ENSMUSG000000020878  | -0.155949031 | -0.835282765 | 0.014852494 | 0.903001335 | 0.999071534 | Lrrc46        | Lrrc46        | LRRC46         | 0.421080201 | 0.474320355 | 1.346404407 | 0           | 0.196207685 | 0.218286485 | 0.129430587  | 0           | 1.414235792 | 0            |
| ENSMUSG000000091014  | -0.060530147 | 1.356555819  | 0.014849137 | 0.903012243 | 0.999071534 | Gm5244        | Gm5244        |                | 2.666841275 | 1.600831199 | 2.221567271 | 3.81601586  | 2.485297341 | 2.255627007 | 1.941458804  | 2.556050739 | 2.907040239 | 1.568615148  |
| ENSMUSG000000022234  | -0.038843114 | 9.138500901  | 0.014809682 | 0.903140544 | 0.999071534 | Cct5          | Cct5          | CCT5           | 842.9323829 | 608.5530158 | 483.7631034 | 562.2725915 | 470.8330409 | 783.3574309 | 927.5643014  | 290.3535474 | 328.3384097 | 432.4149092  |
| ENSMUSG000000006526  | 0.03967756   | 4.039584063  | 0.014789882 | 0.903204997 | 0.999071534 | Tmem110       | Tmem110       | TMEM110-MUSTN1 | 25.12445201 | 14.52606088 | 19.5228639  | 11.6561939  | 13.08051232 | 22.77455656 | 25.62725622  | 8.911636359 | 8.956826681 | 15.88222837  |
| ENSMUSG000000033434  | 0.031331318  | 4.882544815  | 0.014763393 | 0.903291291 | 0.999071534 | Gtbp6         | Gtbp6         | GTPBP6         | 28.28255352 | 33.380295   | 30.36141937 | 30.25059846 | 28.31930917 | 26.70371328 | 16.63183042  | 37.23544184 | 26.39906811 | 34.44417429  |
| ENSMUSG000000044367  | -0.079574485 | 0.724608001  | 0.014747984 | 0.903341523 | 0.999071534 | Slc16a13      | Slc16a13      | SLC16A13       | 1.263240604 | 1.660121243 | 2.558168373 | 0.485674746 | 2.158284533 | 3.710870238 | 0.776583522  | 0.967154334 | 0.31427462  | 1.895409971  |
| ENSMUSG000000040675  | -0.028761101 | 6.135543107  | 0.014730268 | 0.90339931  | 0.999071534 | Mthfd1l       | Mthfd1l       | MTHFD1L        | 75.23299596 | 99.54798456 | 64.42545087 | 50.51017357 | 80.24894308 | 98.5199667  | 63.16212644  | 84.48783928 | 42.50564241 | 54.05186365  |
| ENSMUSG000000040479  | 0.028307553  | 5.802007729  | 0.014703947 | 0.903485236 | 0.999071534 | Dgkz          | Dgkz          | DGKZ           | 76.84713673 | 63.61821765 | 41.94049727 | 44.4739303  | 60.75897972 | 93.86318836 | 47.50102541  | 42.62387313 | 38.65577831 | 57.05837601  |

|                     |              |             |             |             |             |               |               |            |             |             |             |             |             |             |             |             |             |             |
|---------------------|--------------|-------------|-------------|-------------|-------------|---------------|---------------|------------|-------------|-------------|-------------|-------------|-------------|-------------|-------------|-------------|-------------|-------------|
| ENSMUSG00000025475  | -0.077866683 | 0.769383772 | 0.014694879 | 0.903514852 | 0.999071534 | Gpr123        | Adgra1        | ADGRA1     | 1.614140771 | 1.067220799 | 1.481044848 | 2.01208109  | 2.158284533 | 3.201535107 | 1.035444696 | 0.27632981  | 0.549980586 | 2.745076509 |
| ENSMUSG000000054945 | 0.076414704  | 0.653189024 | 0.014683866 | 0.903550838 | 0.999071534 | Gm9958        | Gm9958        |            | 0.280720134 | 0.948640711 | 2.288887492 | 1.80393477  | 1.896674286 | 1.309718907 | 1.164875283 | 1.865226215 | 0.785686551 | 2.0261279   |
| ENSMUSG000000044551 | -0.043254334 | 3.141763346 | 0.014683711 | 0.903551346 | 0.999071534 | 9930012K11Rik | 9930012K11Rik | AC037459.4 | 10.17610486 | 6.04758453  | 14.00260583 | 6.313771696 | 9.41796887  | 9.750129644 | 7.830550511 | 9.326131073 | 4.635550651 | 10.39207536 |
| ENSMUSG000000046352 | -0.080646101 | 1.723424486 | 0.014680242 | 0.903562683 | 0.999071534 | Gjb2          | Gjb2          | GJB2       | 0.561440268 | 7.944865951 | 3.096730136 | 2.844666369 | 2.419894779 | 1.164194584 | 1.812028217 | 8.013564478 | 2.042785033 | 1.372538255 |
| ENSMUSG00000014554  | -0.031876236 | 4.642703319 | 0.014635258 | 0.903709829 | 0.999071534 | Dguok         | Dguok         | DGUOK      | 24.21211157 | 17.25340292 | 32.31370576 | 29.6955416  | 26.42263488 | 20.2278809  | 20.45003274 | 28.60013529 | 21.92065477 | 25.62071409 |
| ENSMUSG00000004032  | -0.045470172 | 2.942723724 | 0.014621458 | 0.903755019 | 0.999071534 | Gstm5         | Gstm5         | GSTM3      | 8.702324159 | 9.664277238 | 7.741825339 | 5.411804311 | 8.502333007 | 8.513172898 | 4.27120937  | 4.697606763 | 8.642552061 | 9.346331924 |
| ENSMUSG00000023088  | -0.030027858 | 6.783433559 | 0.01461022  | 0.903791831 | 0.999071534 | Abcc1         | Abcc1         | ABCC1      | 133.0613436 | 162.8104619 | 104.5483022 | 69.45148866 | 111.1843547 | 144.141842  | 122.7649117 | 110.8082536 | 67.80474935 | 90.39144791 |
| ENSMUSG000000035150 | -0.031696658 | 8.284441748 | 0.014606052 | 0.903805488 | 0.999071534 | Eif2s3x       | Eif2s3x       | EIF2S3     | 313.6345699 | 367.5389853 | 329.8690797 | 305.2118867 | 320.0801365 | 442.1756556 | 371.789361  | 216.2971584 | 218.8137044 | 271.3704206 |
| ENSMUSG000000085611 | -0.19452623  | 0.939856654 | 0.014586852 | 0.903868428 | 0.999071534 | Ap3s1-ps1     | Ap3s1-ps1     |            | 8.140883891 | 1.897281421 | 0           | 0           | 0           | 2.182864846 | 6.277383467 | 0           | 0           | 0           |
| ENSMUSG000000063903 | -0.069049408 | 1.038281167 | 0.014583829 | 0.903878342 | 0.999071534 | Klk1          | Klk1          | KLK2       | 2.035220973 | 1.541541155 | 1.817645949 | 3.538487434 | 1.177246109 | 1.018670261 | 0.970729402 | 1.796143762 | 2.435628308 | 2.483640651 |
| ENSMUSG000000021234 | 0.091234427  | 0.125455309 | 0.01457606  | 0.903903824 | 0.999071534 | Fam161b       | Fam161b       | FAM161B    | 0.491260235 | 0.355740266 | 2.01960661  | 0.277528426 | 1.700466601 | 0.509335131 | 0.841298815 | 1.174401691 | 0.549980586 | 1.633974113 |
| ENSMUSG000000032064 | -0.029724394 | 4.62749081  | 0.014567181 | 0.903932953 | 0.999071534 | Dixdc1        | Dixdc1        | DIXDC1     | 22.10671057 | 26.68051998 | 26.65880726 | 22.89609516 | 30.73920395 | 22.99284304 | 17.66727512 | 28.8764651  | 22.07779208 | 24.50961169 |
| ENSMUSG000000025531 | 0.031077033  | 5.189986605 | 0.014565132 | 0.903939678 | 0.999071534 | Chm           | Chm           | CHM        | 29.40543405 | 43.87463286 | 33.25618885 | 35.38487434 | 44.99696238 | 29.32315109 | 43.03567016 | 51.12101477 | 26.79191139 | 25.62071409 |
| ENSMUSG000000046010 | 0.033472263  | 3.962015234 | 0.014552052 | 0.903982611 | 0.999071534 | Zfp830        | Zfp830        | ZNF830     | 10.87799052 | 14.52606088 | 17.30129663 | 17.76181928 | 18.57432749 | 16.29872418 | 14.23736457 | 16.85611838 | 10.99961171 | 17.32012559 |
| ENSMUSG000000048661 | 0.029309907  | 4.651261824 | 0.014547956 | 0.903996059 | 0.999071534 | Lemd3         | Lemd3         | LEMED3     | 20.56274983 | 25.79116932 | 25.85096461 | 26.15705417 | 29.95437321 | 30.12353487 | 22.71506801 | 31.36343339 | 20.19214436 | 17.90835627 |
| ENSMUSG000000070522 | 0.171587328  | 1.313074223 | 0.014540295 | 0.904021218 | 0.999071534 | Gm6505        | Gm6505        |            | 5.263502516 | 4.268883197 | 0           | 0           | 0.092881971 | 4.074681045 | 8.73656462  | 0           | 0           | 0           |
| ENSMUSG000000018433 | 0.038193787  | 4.837882313 | 0.014535642 | 0.904036502 | 0.999071534 | Nol11         | Nol11         | NOL11      | 43.3010807  | 26.20619963 | 27.06272858 | 20.81463196 | 29.30034759 | 57.4821076  | 38.95860667 | 13.47107822 | 16.65655488 | 19.86912521 |
| ENSMUSG000000059830 | 0.115208148  | 0.363678111 | 0.014519589 | 0.904089252 | 0.999071534 | Gm16380       | Gm16380       | SIVA1      | 2.596661241 | 1.245090933 | 1.413724627 | 0           | 0.523220493 | 1.382481069 | 2.912188207 | 0.27632981  | 0           | 1.437897219 |
| ENSMUSG000000026764 | 0.068611951  | 1.267418169 | 0.014510712 | 0.904118434 | 0.999071534 | Klf5c         | Klf5c         | KLF5C      | 1.403600671 | 1.660121243 | 2.01960661  | 3.677251647 | 2.681505025 | 3.565345915 | 0.582437641 | 1.796143762 | 3.78452169  | 1.830051006 |
| ENSMUSG000000018604 | 0.067937168  | 1.157187579 | 0.014489249 | 0.904189027 | 0.999071534 | Tbx3          | Tbx3          | TBX3       | 1.473780704 | 3.735272798 | 3.164050356 | 1.248877918 | 0.981038424 | 3.710870238 | 2.523896446 | 1.312566595 | 0.785686551 | 2.483640651 |
| ENSMUSG000000041895 | 0.02999204   | 5.8509545   | 0.014486143 | 0.90419925  | 0.999071534 | Wip1l         | Wip1l         | WIP1       | 46.4591822  | 60.29797516 | 70.88819202 | 59.04417267 | 58.53529263 | 49.33274551 | 35.46398083 | 66.4573192  | 62.85492408 | 59.93417045 |
| ENSMUSG000000021906 | 0.037867048  | 3.554914204 | 0.01447728  | 0.904228418 | 0.999071534 | Oxnad1        | Oxnad1        | OXNAD1     | 14.24654681 | 11.79871884 | 13.39672385 | 9.574730704 | 10.66061754 | 14.40690798 | 17.861421   | 8.566224097 | 8.32827744  | 8.431306421 |
| ENSMUSG000000063594 | -0.087797786 | 0.177373606 | 0.014452358 | 0.90431049  | 0.999071534 | Gng8          | Gng8          | GNG8       | 0.842160403 | 0.5336104   | 1.413724627 | 1.595788451 | 0.915635862 | 0.363810808 | 0.258861174 | 1.588896405 | 0.707117896 | 1.633974113 |
| ENSMUSG000000034757 | -0.026461629 | 5.257282675 | 0.01443868  | 0.904355564 | 0.999071534 | Tmub2         | Tmub2         | TMUB2      | 40.98513959 | 44.70469348 | 35.47775612 | 34.76043538 | 44.21213164 | 32.88849701 | 41.93551017 | 44.62726425 | 27.8133039  | 34.11737947 |
| ENSMUSG000000035382 | -0.040295287 | 3.844958632 | 0.014422423 | 0.904409168 | 0.999071534 | Pcsk7         | Pcsk7         | PCSK7      | 18.38716879 | 20.98867572 | 10.9058757  | 11.10113705 | 13.93074562 | 29.03210245 | 14.62565633 | 11.74401691 | 7.149747614 | 8.888819173 |
| ENSMUSG000000033417 | -0.024408838 | 5.474295591 | 0.01439104  | 0.904512727 | 0.999071534 | Cacul1        | Cacul1        | CACUL1     | 40.70441945 | 50.93014815 | 45.57578917 | 41.97617446 | 53.10688002 | 50.27865361 | 44.20054545 | 42.48570822 | 37.47724848 | 37.90819941 |
| ENSMUSG000000062038 | -0.040850248 | 5.317178598 | 0.014343686 | 0.904669205 | 0.999071534 | Gm10108       | Gm10108       |            | 68.28517264 | 31.89804389 | 37.63200317 | 29.00172054 | 43.81971627 | 55.37200492 | 76.04046984 | 21.96821986 | 15.08518178 | 28.1697137  |
| ENSMUSG000000025510 | 0.038746924  | 7.109723647 | 0.014336831 | 0.90469188  | 0.999071534 | Cd151         | Cd151         | CD151      | 189.0650104 | 186.8229299 | 92.90190407 | 94.56781123 | 148.5292174 | 159.931231  | 256.4667081 | 113.7097166 | 64.34772853 | 96.73126747 |
| ENSMUSG000000033068 | -0.037457398 | 3.804385758 | 0.014305751 | 0.90479475  | 0.999071534 | Entpd6        | Entpd6        | ENTPD6     | 16.28176778 | 15.8897319  | 16.2241731  | 9.574730704 | 15.17339429 | 21.24655116 | 18.96158099 | 9.464295978 | 9.742513232 | 8.235229528 |
| ENSMUSG000000041355 | -0.030726271 | 7.406659936 | 0.014305008 | 0.904797212 | 0.999071534 | Ssr2          | Ssr2          | SSR2       | 178.3274652 | 181.2496658 | 180.8894321 | 178.7976886 | 169.5234397 | 186.7077065 | 252.8426516 | 128.2170316 | 113.5317066 | 137.4499024 |
| ENSMUSG000000038459 | 0.025658143  | 5.426695439 | 0.014259218 | 0.90494898  | 0.999071534 | Abhd17c       | Abhd17c       | ABHD17C    | 50.59980418 | 33.61745518 | 44.90258697 | 39.27027231 | 52.77986721 | 58.57354003 | 42.7120937  | 35.16296827 | 30.64177549 | 45.35912137 |
| ENSMUSG000000037353 | -0.032154518 | 4.186908566 | 0.014249062 | 0.904982677 | 0.999071534 | Letmd1        | Letmd1        | LETMD1     | 18.10644865 | 19.80287483 | 16.15685288 | 15.40282765 | 25.83401183 | 21.10102684 | 13.07248928 | 21.13923043 | 11.31388633 | 20.65343278 |
| ENSMUSG000000020755 | 0.026609353  | 5.35041875  | 0.014210796 | 0.905109742 | 0.999071534 | Sap30bp       | Sap30bp       | SAP30BP    | 52.56484512 | 41.08800077 | 41.19997485 | 32.8177364  | 42.31545735 | 52.17046981 | 54.42556182 | 35.23205072 | 27.49902928 | 32.02589261 |
| ENSMUSG000000031633 | -0.029889009 | 9.127996663 | 0.014182843 | 0.905202672 | 0.999071534 | Slc25a4       | Slc25a4       | SLC25A4    | 584.9505796 | 558.037898  | 552.6316888 | 635.2625676 | 598.0410232 | 537.2030385 | 658.9958335 | 483.8534966 | 449.8055504 | 534.7016886 |
| ENSMUSG000000036402 | -0.02635364  | 6.066344392 | 0.014179748 | 0.905212967 | 0.999071534 | Gng12         | Gng12         | GNG12      | 53.05610536 | 86.74133497 | 76.13916921 | 59.46046531 | 75.40915352 | 86.87802086 | 59.14977824 | 74.47088368 | 50.83391985 | 51.89501782 |
| ENSMUSG000000009292 | -0.048718671 | 3.311255688 | 0.01417465  | 0.905229928 | 0.999071534 | Trpm2         | Trpm2         | TRPM2      | 9.684844629 | 9.249246928 | 10.83855548 | 8.603381212 | 7.128879214 | 6.403070214 | 3.041618794 | 8.289894287 | 12.33527885 | 9.084896066 |
| ENSMUSG000000001134 | 0.034819819  | 4.276998182 | 0.014154443 | 0.905297186 | 0.999071534 | Uxt           | Uxt           | UXT        | 25.47535218 | 18.14275359 | 20.5326672  | 15.61097397 | 19.35915823 | 20.00959442 | 32.55179262 | 17.33969555 | 9.113963991 | 16.66653595 |
| ENSMUSG000000027863 | -0.079230127 | 0.459560342 | 0.014150742 | 0.90530951  | 0.999071534 | Cd2           | Cd2           | CD2        | 0.771980369 | 1.304380977 | 2.490848153 | 0.555056852 | 1.504258917 | 2.255627007 | 0.647152935 | 0.414494714 | 0.707117896 | 2.0261279   |
| ENSMUSG000000048216 | 0.04370035   | 2.872343169 | 0.014129034 | 0.905381827 | 0.999071534 | Gpr85         | Gpr85         | GPR85      | 7.368903522 | 4.446753331 | 7.203263577 | 8.811527532 | 8.829345815 | 9.750129644 | 6.471529348 | 4.421276953 | 6.364061063 | 8.56202435  |

|                     |              |              |             |             |             |               |               |             |             |             |             |             |             |             |             |             |             |             |
|---------------------|--------------|--------------|-------------|-------------|-------------|---------------|---------------|-------------|-------------|-------------|-------------|-------------|-------------|-------------|-------------|-------------|-------------|-------------|
| ENSMUSG00000038241  | 0.030504101  | 4.616245082  | 0.014127682 | 0.905386332 | 0.999071534 | Cep250        | Cep250        | CEP250      | 26.66841275 | 29.28928194 | 26.38952637 | 16.58232347 | 27.01125794 | 36.16279428 | 15.01394809 | 23.00445665 | 19.79930108 | 26.86253441 |
| ENSMUSG00000000409  | -0.062001581 | 1.549742426  | 0.014108958 | 0.905448753 | 0.999071534 | Lck           | Lck           | LCK         | 4.702062247 | 4.921073686 | 1.211763966 | 2.150845303 | 1.896674286 | 4.584016176 | 1.617882337 | 1.934308667 | 2.121353688 | 3.267948225 |
| ENSMUSG000000005447 | -0.031960935 | 5.723324246  | 0.01409423  | 0.905497885 | 0.999071534 | Pafah1b3      | Pafah1b3      | PAFAH1B3    | 42.03784009 | 59.34933445 | 57.15486707 | 52.03657991 | 66.12198977 | 31.86982675 | 47.95403247 | 78.61583082 | 33.15597245 | 56.79694015 |
| ENSMUSG00000023967  | 0.032678232  | 5.531180671  | 0.014084112 | 0.905531654 | 0.999071534 | Mrps18a       | Mrps18a       | MRPS18A     | 62.60058992 | 47.84706584 | 34.13135171 | 40.79667865 | 52.25664672 | 57.99144273 | 80.11753333 | 35.23205072 | 24.59198905 | 32.61412329 |
| ENSMUSG00000029571  | 0.02966319   | 7.303178828  | 0.014062585 | 0.905603538 | 0.999071534 | Tmem106b      | Tmem106b      | TMEM106B    | 128.2891013 | 177.8701332 | 150.326052  | 175.5367296 | 177.1755394 | 141.886215  | 183.6620029 | 156.4717547 | 146.1376985 | 131.9597493 |
| ENSMUSG00000031558  | -0.044069336 | 4.22484753   | 0.013987713 | 0.905853996 | 0.999071534 | Slit2         | Slit2         | SLIT2       | 23.93139144 | 26.14690958 | 16.29149332 | 19.56575405 | 11.83786365 | 39.50985371 | 26.46855503 | 9.740625788 | 9.035395336 | 8.954178137 |
| ENSMUSG00000027618  | -0.026123199 | 5.200699933  | 0.013985982 | 0.905859793 | 0.999071534 | Nfs1          | Nfs1          | NFS1        | 36.00235721 | 33.43958505 | 44.29670498 | 40.2416218  | 37.60647292 | 38.63670777 | 36.30527964 | 35.09388582 | 22.15636074 | 44.83624965 |
| ENSMUSG00000037526  | -0.046900584 | 3.341120477  | 0.013982652 | 0.905870948 | 0.999071534 | Atg14         | Atg14         | ATG14       | 10.10592483 | 16.12689208 | 5.183656966 | 10.40731598 | 10.98763035 | 8.14936209  | 5.306654065 | 17.68510781 | 7.071178959 | 8.758101244 |
| ENSMUSG00000024325  | 0.042109166  | 2.874518352  | 0.013973408 | 0.905901923 | 0.999071534 | Ring1         | Ring1         | RING1       | 6.456563086 | 6.99622524  | 5.92417939  | 7.84017804  | 9.614176555 | 9.459080998 | 6.406814054 | 6.562832977 | 3.928432755 | 9.673126747 |
| ENSMUSG00000039518  | 0.051885589  | 3.112623479  | 0.013971724 | 0.905907569 | 0.999071534 | Cdsn          | Cdsn          | CDSN        | 6.105662918 | 11.68013875 | 4.106533441 | 8.950291745 | 12.62269439 | 4.511254014 | 6.989251696 | 16.44162367 | 5.106962581 | 8.104511599 |
| ENSMUSG00000018425  | -0.031270014 | 6.478782433  | 0.013950713 | 0.905978014 | 0.999071534 | Dhx40         | Dhx40         | DHX40       | 85.76000099 | 117.512868  | 76.87969163 | 88.67033217 | 98.88867313 | 65.41318321 | 61.5442441  | 131.1875771 | 77.46869393 | 80.91439806 |
| ENSMUSG00000025812  | -0.02728556  | 5.279982286  | 0.013870719 | 0.906246718 | 0.999071534 | Pard3         | Pard3         | PARD3       | 37.12523774 | 42.03664148 | 37.43004251 | 35.10734591 | 51.73342622 | 52.97085359 | 22.8444986  | 38.40984353 | 32.68456052 | 39.93432731 |
| ENSMUSG00000019326  | 0.073321993  | 1.022787224  | 0.013862137 | 0.906275592 | 0.999071534 | Aoc3          | Aoc3          | AOC3        | 0.701800335 | 2.371601776 | 3.769932339 | 1.110113705 | 1.63506404  | 3.638108076 | 2.9769035   | 1.243484143 | 1.414235792 | 0.457512752 |
| ENSMUSG00000031479  | -0.031119948 | 6.218614533  | 0.013836931 | 0.90636045  | 0.999071534 | Vps36         | Vps36         | VPS36       | 98.11168689 | 50.3372477  | 84.68883719 | 81.87088573 | 74.62432278 | 91.68032352 | 108.5922625 | 40.62048201 | 55.78374512 | 63.07140075 |
| ENSMUSG00000027651  | 0.030715556  | 4.186077283  | 0.013836685 | 0.906361278 | 0.999071534 | Rprd1b        | Rprd1b        | RPRD1B      | 16.84320805 | 17.96488346 | 18.91689192 | 20.60648565 | 18.24731469 | 30.05077271 | 13.71964222 | 18.09960253 | 12.09957289 | 76.71389491 |
| ENSMUSG00000028047  | -0.031672145 | 4.212851043  | 0.013818101 | 0.906423892 | 0.999071534 | Thbs3         | Thbs3         | THBS3       | 19.43986929 | 23.06382727 | 22.75423448 | 12.14186865 | 19.68617104 | 24.08427546 | 13.20191987 | 21.41556024 | 14.22092657 | 15.81686941 |
| ENSMUSG00000040570  | 0.106726637  | -0.174908789 | 0.013809853 | 0.906451696 | 0.999071534 | Rundc3b       | Rundc3b       | RUND3B      | 0.842160403 | 1.185800888 | 0.269280881 | 0.763203172 | 0.654025616 | 0.654859454 | 1.617882337 | 0.069082452 | 0           | 1.503256184 |
| ENSMUSG00000023952  | 0.03335505   | 5.320646839  | 0.013794728 | 0.906502704 | 0.999071534 | Gtpbp2        | Gtpbp2        | GTPBP2      | 38.66919848 | 51.04872823 | 32.58298665 | 37.67448386 | 44.73535213 | 37.10870238 | 19.47930334 | 61.13797037 | 26.79191139 | 49.41137717 |
| ENSMUSG00000046312  | -0.059756963 | 1.919039633  | 0.013753431 | 0.906642116 | 0.999071534 | Al464131      | Al464131      | KIAA1161    | 1.122880537 | 3.913142931 | 2.760129034 | 5.82809695  | 5.559217736 | 2.110102684 | 3.429910554 | 3.661369977 | 4.242707375 | 3.202589261 |
| ENSMUSG00000082776  | 0.100736132  | -0.445352546 | 0.013743707 | 0.906674975 | 0.999071534 | Gm7061        | Gm7061        |             | 0.421080201 | 0.118580089 | 0.269280881 | 1.040731598 | 1.177246109 | 0.363810808 | 0.19414588  | 0.898071881 | 0.864255206 | 0.588230681 |
| ENSMUSG00000035725  | -0.027676791 | 5.321596871  | 0.013719136 | 0.906758054 | 0.999071534 | Prkx          | Prkx          | PRKX        | 36.21289731 | 41.26587091 | 48.94180019 | 39.61718284 | 42.70787272 | 40.52852397 | 26.27440915 | 53.95339532 | 32.52742321 | 36.20886634 |
| ENSMUSG00000026873  | 0.041194682  | 3.717364707  | 0.013708419 | 0.906794315 | 0.999071534 | Phf19         | Phf19         | PHF19       | 16.84320805 | 8.834216617 | 15.01240914 | 12.41939707 | 13.60373281 | 27.86790786 | 14.30207986 | 5.872008453 | 7.228316269 | 12.09140843 |
| ENSMUSG00000034574  | -0.029114246 | 4.963615928  | 0.013699569 | 0.906824268 | 0.999071534 | Daam1         | Daam1         | DAAM1       | 26.80877281 | 39.60574966 | 26.99540836 | 32.8177364  | 36.62543449 | 31.43325378 | 34.36382084 | 35.57746298 | 27.65616659 | 18.36586903 |
| ENSMUSG00000022024  | 0.026442974  | 6.73139047   | 0.013670078 | 0.906924155 | 0.999071534 | Sugt1         | Sugt1         | SUGT1       | 105.2700503 | 115.6748766 | 110.8764029 | 108.9299073 | 104.6440986 | 89.0608857  | 133.4429352 | 101.1367103 | 89.33256085 | 98.95347226 |
| ENSMUSG00000096659  | -0.102890684 | 0.476662971  | 0.013662597 | 0.906949512 | 0.999071534 | Gm25679       | Gm25679       |             | 1.263240604 | 0.592900444 | 0.269280881 | 0.493544286 | 0.457817931 | 0.363810808 | 0.258861174 | 1.588896405 | 2.828471584 | 0.326794823 |
| ENSMUSG00000096205  | -0.102890598 | 0.476662971  | 0.013662483 | 0.906949898 | 0.999071534 | Gm22068       | Gm22068       |             | 1.263240604 | 0.592900444 | 0.269280881 | 0.493544286 | 0.457817931 | 0.363810808 | 0.258861174 | 1.588896405 | 2.828471584 | 0.326794823 |
| ENSMUSG00000094826  | -0.102889806 | 0.476662971  | 0.013661435 | 0.906953449 | 0.999071534 | Gm23804       | Gm23804       |             | 1.263240604 | 0.592900444 | 0.269280881 | 0.493544286 | 0.457817931 | 0.363810808 | 0.258861174 | 1.588896405 | 2.828471584 | 0.326794823 |
| ENSMUSG00000093815  | -0.102889652 | 0.476662971  | 0.013661232 | 0.906954139 | 0.999071534 | Gm26444       | Gm26444       |             | 1.263240604 | 0.592900444 | 0.269280881 | 0.493544286 | 0.457817931 | 0.363810808 | 0.258861174 | 1.588896405 | 2.828471584 | 0.326794823 |
| ENSMUSG00000096214  | -0.102889563 | 0.476662971  | 0.013661114 | 0.906954539 | 0.999071534 | Gm22634       | Gm22634       |             | 1.263240604 | 0.592900444 | 0.269280881 | 0.493544286 | 0.457817931 | 0.363810808 | 0.258861174 | 1.588896405 | 2.828471584 | 0.326794823 |
| ENSMUSG00000096206  | -0.102889504 | 0.476662971  | 0.013661035 | 0.906954804 | 0.999071534 | Gm22317       | Gm22317       |             | 1.263240604 | 0.592900444 | 0.269280881 | 0.493544286 | 0.457817931 | 0.363810808 | 0.258861174 | 1.588896405 | 2.828471584 | 0.326794823 |
| ENSMUSG00000095969  | -0.102889069 | 0.476662971  | 0.01366046  | 0.906956755 | 0.999071534 | Rnu1a1        | Rnu1a1        |             | 1.263240604 | 0.592900444 | 0.269280881 | 0.493544286 | 0.457817931 | 0.363810808 | 0.258861174 | 1.588896405 | 2.828471584 | 0.326794823 |
| ENSMUSG00000024241  | -0.027353232 | 5.0268966    | 0.013615145 | 0.907110507 | 0.999071534 | Sos1          | Sos1          | SOS1        | 23.6506713  | 39.19071935 | 38.23788515 | 29.97307003 | 39.24153696 | 47.87750228 | 25.69197151 | 33.02141224 | 21.21353688 | 31.04550814 |
| ENSMUSG00000022956  | -0.028712095 | 7.222917755  | 0.013608451 | 0.907133242 | 0.999071534 | Atp5o         | Atp5o         | AP000304.12 | 156.2207547 | 130.853128  | 172.5417247 | 179.2833633 | 140.68091   | 137.8115339 | 182.7559888 | 135.8161014 | 123.3527885 | 129.4761087 |
| ENSMUSG00000030583  | 0.026947775  | 5.092561797  | 0.013499814 | 0.907502991 | 0.999071534 | Sipa1B        | Sipa1B        | SIPA1B      | 31.37047499 | 33.9139054  | 36.4020392  | 33.71970378 | 39.37234208 | 53.62571304 | 22.00319978 | 28.8764651  | 28.83469642 | 35.22848187 |
| ENSMUSG00000025453  | -0.025387565 | 6.480523768  | 0.013479371 | 0.907572738 | 0.999071534 | Nnt           | Nnt           | NNT         | 87.72504193 | 84.13257301 | 74.7927648  | 106.0158588 | 113.6042495 | 114.4548801 | 89.69539676 | 83.38252004 | 57.66939284 | 88.7574738  |
| ENSMUSG00000054252  | -0.108454877 | -0.467255477 | 0.013468157 | 0.907611021 | 0.999071534 | Fgfr3         | Fgfr3         | FGFR3       | 0.491260235 | 0.652190488 | 0.403921322 | 1.110113705 | 0.457817931 | 1.964578361 | 0.582437641 | 0.138164905 | 0.31427462  | 0           |
| ENSMUSG00000050315  | 0.072120247  | 1.265951862  | 0.01346504  | 0.907621665 | 0.999071534 | Synpo2        | Synpo2        | SYNPO2      | 2.315941107 | 1.837991377 | 2.490848153 | 3.538487434 | 1.24264867  | 2.837724299 | 2.523896446 | 0.345412262 | 4.16413872  | 1.045743432 |
| ENSMUSG00000079144  | 0.041431071  | 2.777170532  | 0.013434219 | 0.90772698  | 0.999071534 | Al30010J15Rik | Al30010J15Rik | C1orf74     | 7.018003354 | 7.589125684 | 5.99149961  | 5.481186417 | 8.436930446 | 6.839643183 | 9.060141087 | 4.421276953 | 5.971217787 | 6.53589645  |
| ENSMUSG00000030101  | -0.03744963  | 5.12603689   | 0.013406317 | 0.907822421 | 0.999071534 | Sumf1         | Sumf1         | SUMF1       | 44.7748614  | 49.44789704 | 26.38952637 | 28.44666369 | 34.72876021 | 56.68172383 | 60.31465352 | 19.96482874 | 15.94943698 | 20.19592003 |

|                     |              |             |             |             |             |               |               |          |             |             |             |             |             |             |              |             |             |             |
|---------------------|--------------|-------------|-------------|-------------|-------------|---------------|---------------|----------|-------------|-------------|-------------|-------------|-------------|-------------|--------------|-------------|-------------|-------------|
| ENSMUSG00000060802  | 0.039968895  | 10.83260418 | 0.013399038 | 0.90784734  | 0.999071534 | B2m           | B2m           | B2M      | 1179.936904 | 1671.742092 | 2291.37834  | 2174.712748 | 1971.560219 | 1256.748054 | 844.8581564  | 2590.315635 | 1887.847645 | 2073.44779  |
| ENSMUSG00000015214  | 0.031468032  | 4.308337308 | 0.013379124 | 0.907915539 | 0.999071534 | Mtmr1         | Mtmr1         | MTMR1    | 16.42212785 | 24.90181865 | 14.13724627 | 17.9699656  | 27.9268938  | 25.03018356 | 19.8675951   | 24.31702324 | 12.64955347 | 15.55543355 |
| ENSMUSG00000026646  | 0.043792315  | 3.097767731 | 0.013350545 | 0.908013506 | 0.999071534 | Suv39h2       | Suv39h2       | SUV39H2  | 11.01826527 | 5.573264174 | 7.674505119 | 10.82360862 | 7.848307392 | 13.6065242  | 12.42533635  | 4.766689215 | 5.892649132 | 5.816947841 |
| ENSMUSG000000086798 | -0.086426533 | 0.266785994 | 0.013339434 | 0.908051621 | 0.999071534 | Gm16222       | Gm16222       |          | 0.210540101 | 0.711480533 | 1.615685288 | 2.22022741  | 0.850233301 | 0.727621615 | 0.647152935  | 0.967154334 | 0.392843275 | 2.287563758 |
| ENSMUSG00000037936  | 0.026284796  | 6.123247647 | 0.013314067 | 0.908138702 | 0.999071534 | Scarb1        | Scarb1        | SCARB1   | 83.16333975 | 72.68959444 | 69.13786629 | 59.52984742 | 74.49351766 | 102.1580748 | 93.2547379   | 52.84807608 | 41.01283796 | 59.41129873 |
| ENSMUSG00000022466  | 0.031055479  | 5.417610651 | 0.0133308   | 0.908159539 | 0.999071534 | Rpap3         | Rpap3         | RPAP3    | 49.33656358 | 47.60990566 | 32.78494731 | 49.26129565 | 39.43774464 | 63.01203188 | 49.50719951  | 17.89235517 | 36.29871866 | 44.90160861 |
| ENSMUSG00000034209  | -0.063341092 | 1.45657518  | 0.013292508 | 0.908212776 | 0.999071534 | Rasl10a       | Rasl10a       | RASL10A  | 2.807201342 | 1.719411288 | 2.625488593 | 5.273040098 | 1.24264867  | 2.182864846 | 2.135604685  | 3.17779281  | 3.299883514 | 1.176461361 |
| ENSMUSG00000046785  | -0.029261807 | 4.63991696  | 0.013275226 | 0.908272201 | 0.999071534 | Epm2aip1      | Epm2aip1      | EPM2AIP1 | 18.80824899 | 33.79532531 | 19.5228639  | 25.74076153 | 32.24346287 | 29.6869619  | 24.26823505  | 28.66921774 | 16.1065743  | 21.1763045  |
| ENSMUSG00000003873  | 0.025359273  | 6.385950328 | 0.013258811 | 0.908328679 | 0.999071534 | Bax           | Bax           | BAX      | 109.1299522 | 77.90711835 | 80.38034309 | 70.28407393 | 93.59106564 | 82.58505333 | 89.56596618  | 82.00087099 | 53.34811681 | 101.5024719 |
| ENSMUSG00000018983  | 0.057139735  | 2.139094392 | 0.013231947 | 0.908421186 | 0.999071534 | E2f2          | E2f2          | E2F2     | 6.807463254 | 4.268883197 | 3.635291898 | 2.844666369 | 4.316569065 | 9.822891806 | 5.047792891  | 0.967154334 | 2.749902928 | 3.660102012 |
| ENSMUSG00000028199  | -0.035899985 | 4.300984995 | 0.013223502 | 0.908450283 | 0.999071534 | Cryz          | Cryz          | CRYZ     | 17.33446828 | 30.1786326  | 18.37842015 | 13.87642131 | 23.6757273  | 21.90141062 | 27.11570797  | 25.14601267 | 8.788258026 | 12.02604947 |
| ENSMUSG00000012519  | -0.023167918 | 5.648867758 | 0.013204606 | 0.908515433 | 0.999071534 | Mkl           | Mkl           | MLKL     | 49.82782381 | 45.65333419 | 61.32872073 | 48.63685669 | 56.44241066 | 60.39259406 | 50.67207479  | 43.45286256 | 43.13419165 | 42.81012175 |
| ENSMUSG00000036478  | 0.038892342  | 8.686679309 | 0.013202791 | 0.90852169  | 0.999071534 | Btg1          | Btg1          | BTG1     | 332.1620988 | 434.5960255 | 430.7147697 | 425.242931  | 458.2103465 | 236.9135979 | 207.3478003  | 654.487154  | 395.3574725 | 431.5652426 |
| ENSMUSG00000001870  | -0.030336875 | 8.302856445 | 0.013187293 | 0.908575163 | 0.999071534 | Ltbp1         | Ltbp1         | LTBP1    | 277.7725728 | 278.3074684 | 333.03313   | 390.8987883 | 369.8514858 | 370.5776886 | 263.1970986  | 303.1338011 | 294.318182  | 272.546882  |
| ENSMUSG000000021725 | -0.026001289 | 4.886589392 | 0.013186523 | 0.90857782  | 0.999071534 | Parp8         | Parp8         | PARP8    | 29.82651426 | 33.49887509 | 32.38102598 | 24.90817625 | 34.00933203 | 41.32890774 | 23.55636683  | 25.9750021  | 27.49902928 | 23.52922722 |
| ENSMUSG000000032374 | 0.03745034   | 8.011723694 | 0.013182259 | 0.908592536 | 0.999071534 | Plod2         | Plod2         | PLOD2    | 184.7840283 | 375.4838512 | 223.7050922 | 240.8252918 | 298.5626937 | 157.239031  | 215.6313579  | 415.6000336 | 226.0420207 | 214.2466856 |
| ENSMUSG000000006998 | -0.029626771 | 8.405300069 | 0.013151845 | 0.908697582 | 0.999071534 | Psmd2         | Psmd2         | PSMD2    | 385.1480241 | 428.607731  | 339.1592701 | 298.8287329 | 329.7597156 | 495.8741308 | 388.9389138  | 254.0161775 | 244.3485174 | 271.7625744 |
| ENSMUSG000000093938 | -0.054539879 | 2.92112347  | 0.013140078 | 0.908738256 | 0.999071534 | Evizb         | Evizb         | EVI2B    | 13.96582667 | 6.166164618 | 4.106533441 | 5.273040098 | 10.20279961 | 13.2427134  | 10.095585878 | 5.733843549 | 1.257098482 | 7.058768167 |
| ENSMUSG000000025372 | -0.03132005  | 6.439723049 | 0.013130197 | 0.908772429 | 0.999071534 | Baiap2        | Baiap2        | BAIAP2   | 81.61937901 | 71.74095373 | 96.13327465 | 112.1214842 | 90.90956062 | 76.32750744 | 45.49485132  | 78.89216063 | 92.94671898 | 111.2409576 |
| ENSMUSG000000053436 | -0.035404576 | 5.45040055  | 0.013085722 | 0.908926389 | 0.999071534 | Mapk14        | Mapk14        | MAPK14   | 59.51266844 | 57.21489285 | 31.84246422 | 34.34414274 | 47.48225972 | 89.642983   | 52.09581125  | 21.13923043 | 19.72073243 | 37.97355838 |
| ENSMUSG000000023143 | -0.032661235 | 4.009424177 | 0.013085664 | 0.90892659  | 0.999071534 | Nagpa         | Nagpa         | NAGPA    | 18.94860906 | 16.00831199 | 17.09933597 | 11.72557601 | 20.53640434 | 23.72046466 | 18.8321504   | 15.05997462 | 10.68533709 | 9.738485711 |
| ENSMUSG000000096971 | -0.058221432 | 1.330972473 | 0.013082226 | 0.908938501 | 0.999071534 | 4930556M19Rik | 4930556M19Rik |          | 3.36864161  | 2.727342043 | 3.298690797 | 1.387642131 | 1.896674286 | 1.45524323  | 1.812028217  | 3.523205072 | 1.571373102 | 2.745076509 |
| ENSMUSG000000017291 | 0.028759068  | 6.214124442 | 0.013068193 | 0.908987144 | 0.999071534 | Taok1         | Taok1         | TAOK1    | 50.59980418 | 81.34594093 | 79.84178133 | 71.32480553 | 97.90763471 | 77.70998851 | 45.36542073  | 92.2941564  | 68.35472994 | 74.31314264 |
| ENSMUSG000000020289 | 0.033120972  | 3.898284849 | 0.013060969 | 0.909012194 | 0.999071534 | Npri3         | Npri3         | NPRL3    | 19.15914916 | 12.03587901 | 16.69541464 | 15.74973819 | 12.0994739  | 21.82864846 | 11.58403753  | 10.56961522 | 11.47102364 | 18.0390742  |
| ENSMUSG000000001281 | -0.028388796 | 6.416890179 | 0.013060302 | 0.909014507 | 0.999071534 | Itgb7         | Itgb7         | ITGB7    | 102.1119488 | 103.6982877 | 62.67512514 | 79.02621936 | 101.1777628 | 57.77315625 | 100.1792743  | 86.6293953  | 61.04784501 | 97.90772883 |
| ENSMUSG000000027303 | 0.027342799  | 6.794361462 | 0.013024694 | 0.909138085 | 0.999071534 | Ptpra         | Ptpra         | PTPRA    | 98.53276709 | 153.6797951 | 95.19079156 | 90.82117747 | 133.9444461 | 99.10206399 | 105.5506437  | 129.3914333 | 92.00389512 | 109.2801887 |
| ENSMUSG000000053898 | -0.024533752 | 5.753616556 | 0.013013194 | 0.909178035 | 0.999071534 | Ech1          | Ech1          | ECH1     | 59.30212834 | 60.71300547 | 45.30650829 | 53.42422204 | 63.44048475 | 44.16663204 | 63.5504182   | 56.09495134 | 41.71995586 | 49.99960785 |
| ENSMUSG000000037573 | 0.033010997  | 5.33271907  | 0.012999269 | 0.909226427 | 0.999071534 | Tob1          | Tob1          | TOB1     | 27.65093322 | 35.75189678 | 40.93069397 | 49.60820618 | 51.34101085 | 27.50409706 | 25.8214021   | 56.71669342 | 41.87709317 | 38.3003532  |
| ENSMUSG000000021792 | -0.072268253 | 1.150823163 | 0.012991082 | 0.909254892 | 0.999071534 | Fam213a       | Fam213a       | FAM213A  | 4.982782381 | 1.541541155 | 1.817645949 | 1.387642131 | 1.438856355 | 3.783632399 | 3.818202315  | 1.72706131  | 0.392843275 | 0.653589645 |
| ENSMUSG000000042766 | 0.057024853  | 1.730409908 | 0.012968518 | 0.909333396 | 0.999071534 | Trim46        | Trim46        | TRIM46   | 4.070441945 | 3.853852886 | 1.683005509 | 3.122194795 | 3.531738326 | 3.492583753 | 1.229590576  | 3.385040167 | 4.714119306 | 2.418281687 |
| ENSMUSG000000021754 | -0.038131794 | 4.012198241 | 0.012952972 | 0.90938752  | 0.999071534 | Map3k1        | Map3k1        | MAP3K1   | 11.0884453  | 20.92938568 | 16.5607742  | 19.70451826 | 15.5004071  | 20.30064306 | 6.600959935  | 22.79720929 | 10.37106247 | 17.05868974 |
| ENSMUSG000000096188 | 0.025914312  | 5.251686973 | 0.012942183 | 0.909425101 | 0.999071534 | Cmtm4         | Cmtm4         | CMTM4    | 37.82703808 | 50.15937757 | 35.47775612 | 33.99723221 | 38.26049853 | 60.17430758 | 39.60575961  | 34.19581393 | 20.66355629 | 36.53566116 |
| ENSMUSG000000062352 | 0.031541666  | 5.952746231 | 0.012935287 | 0.909449134 | 0.999071534 | Itgb1bp1      | Itgb1bp1      | ITGB1BP1 | 91.86566391 | 52.53097934 | 44.70062631 | 65.49670858 | 63.11347194 | 47.58645364 | 100.7617119  | 51.46642703 | 36.45585597 | 65.94719519 |
| ENSMUSG000000011658 | -0.038475778 | 3.113403446 | 0.012926776 | 0.909478799 | 0.999071534 | Fuz           | Fuz           | FUZ      | 11.0884453  | 10.61291795 | 6.597381593 | 6.383153803 | 10.39900729 | 8.14936209  | 10.095585878 | 6.286503168 | 7.306884924 | 8.56202435  |
| ENSMUSG000000034269 | 0.028316558  | 6.095111284 | 0.012924496 | 0.909486749 | 0.999071534 | Setd5         | Setd5         | SETD5    | 61.68824948 | 83.1839323  | 70.88819202 | 58.14220529 | 77.63284061 | 79.01970741 | 42.38851723  | 102.5183594 | 46.51264382 | 64.05178521 |
| ENSMUSG000000045598 | -0.034332044 | 3.846543475 | 0.012916913 | 0.909513192 | 0.999071534 | Zfp553        | Zfp553        | ZNF48    | 12.63240604 | 15.05967128 | 14.20456649 | 15.12529923 | 17.78949675 | 17.75396741 | 7.636404631  | 16.51070612 | 14.37806388 | 11.37245982 |
| ENSMUSG000000035929 | -0.032825516 | 8.231013552 | 0.01285535  | 0.909728158 | 0.999071534 | H2-Q4         | H2-Q4         |          | 281.8430147 | 288.0310357 | 359.9612182 | 313.3295932 | 331.9834027 | 340.5996781 | 149.945335   | 380.7133951 | 259.0408559 | 298.1022371 |
| ENSMUSG000000013629 | 0.036167353  | 5.560879732 | 0.01281577  | 0.90986664  | 0.999071534 | Cad           | Cad           | CAD      | 64.07437062 | 43.10386228 | 45.84507005 | 41.14358918 | 47.87467509 | 116.4194584 | 43.48867722  | 19.41216912 | 24.27771443 | 43.20227554 |
| ENSMUSG000000033790 | 0.028303742  | 4.224375664 | 0.012799446 | 0.909923817 | 0.999071534 | Tabgcp5       | Tabgcp5       | TUBGCP5  | 17.82572852 | 15.47470159 | 20.1960661  | 21.92474567 | 19.68617104 | 23.21112953 | 18.18499747  | 14.99089217 | 14.53520119 | 20.39199693 |

|                     |              |              |             |             |             |               |               |              |             |             |             |             |             |             |             |             |             |             |
|---------------------|--------------|--------------|-------------|-------------|-------------|---------------|---------------|--------------|-------------|-------------|-------------|-------------|-------------|-------------|-------------|-------------|-------------|-------------|
| ENSMUSG00000029570  | -0.039801492 | 4.386432985  | 0.012728423 | 0.910173015 | 0.999071534 | Lfng          | Lfng          | LFNG         | 36.98487768 | 20.1586151  | 15.48365068 | 18.94131509 | 18.24731469 | 37.2542267  | 30.67504911 | 8.013564478 | 10.60676844 | 17.18940766 |
| ENSMUSG000000026172 | 0.034986933  | 3.459401579  | 0.012717735 | 0.910210576 | 0.999071534 | Bcs1l         | Bcs1l         | BCS1L        | 9.755024662 | 13.63671021 | 9.492151068 | 10.26855177 | 12.62269439 | 9.677367482 | 10.16030108 | 9.049801264 | 9.978219197 | 13.66002358 |
| ENSMUSG000000031577 | 0.035855844  | 3.489816025  | 0.012710167 | 0.910237184 | 0.999071534 | Tti2          | Tti2          | TTI2         | 10.456825   | 10.19788764 | 10.50195437 | 10.6154623  | 15.23879685 | 10.47775126 | 8.154126978 | 12.57300634 | 7.778296855 | 15.22863873 |
| ENSMUSG000000022575 | 0.024651118  | 6.096870078  | 0.0126971   | 0.910283141 | 0.999071534 | Gsdmd         | Gsdmd         | GSDMD        | 82.81243958 | 66.58271987 | 62.74244536 | 68.20261074 | 71.55040239 | 69.56062642 | 53.13125595 | 67.21722618 | 53.11241085 | 89.34570448 |
| ENSMUSG000000097445 | 0.054291524  | 1.66351509   | 0.01262443  | 0.910539168 | 0.999071534 | Gm26631       | Gm26631       |              | 3.509001677 | 2.312311732 | 3.096730136 | 4.579219032 | 1.831271725 | 4.074681045 | 2.9769035   | 1.4507315   | 2.278490998 | 4.379050622 |
| ENSMUSG000000025764 | 0.033705513  | 6.708981792  | 0.012621258 | 0.910550361 | 0.999071534 | Phf17         | Jade1         | JADE1        | 78.0401973  | 70.67373293 | 148.2391252 | 132.866734  | 102.5512166 | 98.5199667  | 65.16830053 | 119.0981479 | 129.4025749 | 83.39803871 |
| ENSMUSG000000039431 | -0.095084046 | 0.046659004  | 0.012613852 | 0.910576498 | 0.999071534 | Mtmr7         | Mtmr7         | MTMR7        | 1.052700503 | 0.5336104   | 0           | 2.567137942 | 0.588623054 | 1.164194584 | 0.647152935 | 0.552659619 | 0.942823861 | 0.915025503 |
| ENSMUSG000000053175 | 0.031770145  | 4.936412668  | 0.012609166 | 0.910593041 | 0.999071534 | BcB           | BcB           | BCL3         | 25.68589228 | 28.69638149 | 41.19997485 | 23.38176991 | 37.99888829 | 31.86982675 | 16.43768454 | 46.76882027 | 21.37067419 | 32.35268743 |
| ENSMUSG000000092541 | -0.121341223 | -0.601334681 | 0.01260456  | 0.910609302 | 0.999071534 | Gm20537       | Gm20537       | RP11-321N4.5 | 0.631620302 | 0           | 1.346404407 | 0.693821065 | 0.130805123 | 0.509335131 | 0.19414588  | 0.414494714 | 0           | 1.372538255 |
| ENSMUSG000000057337 | 0.058983293  | 1.697429487  | 0.0126024   | 0.91061693  | 0.999071534 | Chst3         | Chst3         | CHST3        | 3.649361744 | 5.336103997 | 0.875162864 | 1.526406344 | 4.578179312 | 4.147443207 | 4.335924663 | 2.003391119 | 2.042785033 | 3.071871332 |
| ENSMUSG000000079110 | -0.190858183 | -1.222348981 | 0.012598622 | 0.910630272 | 0.999071534 | Capn3         | Capn3         | CAPN3        | 0.140360067 | 0           | 1.279084186 | 0           | 0.196207685 | 0           | 0           | 0           | 0           | 1.30717929  |
| ENSMUSG000000062762 | 0.026074898  | 4.972885006  | 0.012572414 | 0.910722886 | 0.999071534 | Ei24          | Ei24          | EI24         | 30.73885469 | 27.09555029 | 32.04442488 | 36.63375226 | 33.94392947 | 46.42225905 | 37.34072434 | 25.62958984 | 23.57059653 | 22.41812483 |
| ENSMUSG000000033762 | 0.050311334  | 3.189232922  | 0.012534159 | 0.91085825  | 0.999071534 | Recq4         | Recq4         | RECQL4       | 18.59770889 | 3.972432975 | 9.357510628 | 3.885397967 | 10.59521498 | 18.48158903 | 7.118682283 | 4.62852431  | 6.835472994 | 8.954178137 |
| ENSMUSG000000033487 | -0.038923969 | 6.45425771   | 0.012533699 | 0.910859877 | 0.999071534 | Fndc3a        | Fndc3a        | FNDCA        | 52.70520519 | 152.9683146 | 72.03263577 | 79.37312989 | 104.4478909 | 63.37584269 | 50.28378303 | 167.5940295 | 61.36211963 | 67.84260516 |
| ENSMUSG000000029417 | -0.033211327 | 5.414287538  | 0.0125183   | 0.910914425 | 0.999071534 | Cxc19         | Cxc19         | CXCL9        | 63.51293036 | 39.96148993 | 35.47775612 | 45.72280822 | 38.58751134 | 37.32698886 | 19.67344922 | 35.23205072 | 52.64099892 | 51.96037678 |
| ENSMUSG000000078862 | 0.106585713  | 1.031162544  | 0.01248909  | 0.911017986 | 0.999071534 | Gm14326       | Gm14326       | ZNF788       | 3.649361744 | 3.853852886 | 0.807842644 | 0.555056852 | 0.719428178 | 3.929156722 | 4.853647011 | 1.4507315   | 0           | 0           |
| ENSMUSG000000026404 | 0.039772183  | 2.75237656   | 0.01247019  | 0.911085063 | 0.999071534 | Ddx59         | Ddx59         | DDX59        | 7.860163757 | 6.581194929 | 5.425937848 | 5.134275885 | 8.960150939 | 7.130691829 | 6.600959935 | 7.322739954 | 6.128355098 | 4.967281302 |
| ENSMUSG000000024538 | -0.031692124 | 7.038778003  | 0.012450341 | 0.911155562 | 0.999071534 | Ppic          | Ppic          | PPIC         | 144.6410491 | 131.8610588 | 134.6404407 | 160.6889588 | 114.9777033 | 135.5559069 | 220.5497202 | 74.33271878 | 101.3535651 | 98.29988262 |
| ENSMUSG000000006333 | -0.030901591 | 10.0120107   | 0.012442039 | 0.911185065 | 0.999071534 | Rps9          | Rps9          | RPS9         | 1438.269607 | 1054.53273  | 867.2863987 | 1086.454406 | 973.5825319 | 943.2158998 | 1461.724334 | 841.2170228 | 696.1182842 | 1003.064028 |
| ENSMUSG000000020287 | -0.026164616 | 4.563278435  | 0.012440111 | 0.911191918 | 0.999071534 | Mpg           | Mpg           | MPG          | 31.44065503 | 22.2930567  | 24.30259954 | 23.58991623 | 21.58284533 | 25.10294573 | 23.68579741 | 20.51748836 | 18.62077126 | 24.70568858 |
| ENSMUSG000000007670 | -0.02803708  | 6.419699732  | 0.012438854 | 0.911196385 | 0.999071534 | Khsp          | Khsp          | KHSRP        | 71.16255401 | 86.08914448 | 103.269218  | 80.4832436  | 107.3910061 | 120.712426  | 42.84152428 | 91.11975471 | 67.25476876 | 92.02542202 |
| ENSMUSG000000026365 | 0.054741564  | 3.154159105  | 0.012423014 | 0.911252715 | 0.999071534 | Cfh           | Cfh           | CFH          | 10.59718506 | 11.26510844 | 8.751628644 | 7.007592761 | 7.128879214 | 18.84539983 | 17.53784453 | 2.348803381 | 2.592765618 | 4.901922338 |
| ENSMUSG000000023106 | 0.026925154  | 6.943280664  | 0.012409045 | 0.911302416 | 0.999071534 | Denr          | Denr          | DENR         | 127.9382011 | 105.9513094 | 155.1057877 | 127.8712224 | 114.1928725 | 131.553988  | 166.8360266 | 88.84003378 | 92.23960108 | 122.8748533 |
| ENSMUSG000000044320 | 0.058791162  | 1.200700256  | 0.012393232 | 0.911358714 | 0.999071534 | 1700001O22Rik | 1700001O22Rik | C9orf50      | 1.614140771 | 3.438822576 | 1.481044848 | 1.387642131 | 3.139322957 | 2.328389169 | 1.359021163 | 3.661369977 | 1.492804447 | 1.830051006 |
| ENSMUSG000000024590 | 0.034992228  | 5.643015624  | 0.012354224 | 0.911497753 | 0.999071534 | Lmnb1         | Lmnb1         | LMNB1        | 60.00392868 | 44.94185366 | 63.01172624 | 39.27027231 | 49.11732376 | 117.8019395 | 59.66750059 | 24.10977589 | 26.39906811 | 32.02589261 |
| ENSMUSG000000043323 | -0.026906128 | 4.474479325  | 0.012352647 | 0.911503379 | 0.999071534 | Fbrs1         | Fbrs1         | FBRS1        | 20.98383003 | 23.12311732 | 25.44704329 | 21.1615425  | 25.11458365 | 27.35857273 | 14.62565633 | 23.41895136 | 18.07079067 | 22.74491965 |
| ENSMUSG000000045128 | -0.030734898 | 9.250353369  | 0.012351494 | 0.911507489 | 0.999071534 | Rpl18a        | Rpl18a        | RPL18A       | 460.24066   | 606.3592842 | 763.7478998 | 692.5028055 | 661.2853003 | 467.133077  | 531.4419901 | 653.8654119 | 527.6670876 | 681.6286408 |
| ENSMUSG000000003184 | -0.024490085 | 5.275860387  | 0.012331931 | 0.911577309 | 0.999071534 | Irf3          | Irf3          | IRF3         | 41.19567969 | 31.95733394 | 42.27709837 | 38.29892282 | 48.59410327 | 40.38299964 | 34.10495966 | 31.08710358 | 30.64177549 | 48.75778752 |
| ENSMUSG000000076928 | -0.060104356 | 0.934146565  | 0.012284757 | 0.911745905 | 0.999071534 | Trac          | Trac          | TRAC         | 2.666841275 | 1.837991377 | 1.817645949 | 1.248877918 | 1.896674286 | 3.34705943  | 1.423736457 | 0.690824524 | 1.728510412 | 1.437897219 |
| ENSMUSG000000032332 | -0.045331275 | 7.142175282  | 0.012255426 | 0.911850893 | 0.999071534 | Col12a1       | Col12a1       | COL12A1      | 107.0947312 | 338.8426038 | 105.6927459 | 77.22228459 | 120.7331287 | 158.1849391 | 217.8963931 | 173.5351204 | 35.74873807 | 105.8161635 |
| ENSMUSG000000032352 | 0.03803315   | 2.907486346  | 0.012228771 | 0.911946416 | 0.999071534 | Lrrc1         | Lrrc1         | LRRC1        | 7.439083555 | 6.403324796 | 8.415027543 | 8.811527532 | 6.54025616  | 11.13261071 | 6.018522294 | 7.391822406 | 5.735511822 | 6.405178521 |
| ENSMUSG000000022843 | 0.038595639  | 3.37652302   | 0.012227379 | 0.911951407 | 0.999071534 | Cicn2         | Cicn2         | CLCN2        | 9.825204696 | 8.893506661 | 8.078426441 | 14.36209606 | 11.05303291 | 8.949745867 | 6.924536402 | 15.8198816  | 7.85686551  | 10.1306395  |
| ENSMUSG000000007656 | 0.026908981  | 7.109508829  | 0.012199989 | 0.912049679 | 0.999071534 | Arpp19        | Arpp19        | ARPP19       | 135.4474647 | 102.6310669 | 178.8698254 | 158.3993493 | 131.4591488 | 145.2332744 | 154.5401208 | 133.9508752 | 102.5320949 | 138.038133  |
| ENSMUSG000000042675 | -0.040648512 | 5.355332627  | 0.012145335 | 0.912246101 | 0.999071534 | Ypel3         | Ypel3         | YPEL3        | 32.28281543 | 42.80741206 | 37.36272229 | 51.96719781 | 49.57514169 | 18.3360647  | 13.9137881  | 67.70080335 | 35.43446345 | 52.2871716  |
| ENSMUSG000000017404 | 0.032859702  | 10.83985587  | 0.012135836 | 0.912280288 | 0.999071534 | Rpl19         | Rpl19         | RPL19        | 1756.67642  | 2098.452542 | 1603.096407 | 1719.219218 | 2246.905004 | 1668.945699 | 3026.798991 | 1996.068379 | 993.1863691 | 1337.179055 |
| ENSMUSG000000018661 | -0.030821604 | 4.105412591  | 0.012123176 | 0.91232587  | 0.999071534 | Cog1          | Cog1          | COG1         | 15.79050755 | 19.74358479 | 15.61829112 | 12.62754339 | 26.35723232 | 25.32123221 | 12.68419752 | 13.26383086 | 14.06378926 | 17.58156145 |
| ENSMUSG000000022710 | 0.024999429  | 6.94308333   | 0.012104466 | 0.912393275 | 0.999071534 | Usp7          | Usp7          | USP7         | 119.7973173 | 138.0865134 | 136.256126  | 116.2844106 | 122.3027902 | 171.7187012 | 87.94808384 | 116.5420972 | 105.8319784 | 122.2866226 |
| ENSMUSG000000032120 | -0.048549353 | 3.020623911  | 0.012082448 | 0.912472672 | 0.999071534 | C2cd2l        | C2cd2l        | C2CD2L       | 10.6673651  | 14.22961066 | 4.645095204 | 6.175007483 | 6.605658721 | 16.80805931 | 10.80745401 | 4.006782239 | 3.299883514 | 5.359435089 |
| ENSMUSG000000027122 | -0.023326179 | 5.419900419  | 0.012067786 | 0.912525579 | 0.999071534 | Art14ep       | Art14ep       | ARL14EP      | 41.12549966 | 51.76020877 | 36.21827854 | 44.61269451 | 49.64054425 | 41.47443207 | 43.03567016 | 40.89681182 | 37.24154252 | 40.3264811  |

|                     |              |              |             |             |             |               |               |         |             |             |             |             |             |             |             |             |             |             |
|---------------------|--------------|--------------|-------------|-------------|-------------|---------------|---------------|---------|-------------|-------------|-------------|-------------|-------------|-------------|-------------|-------------|-------------|-------------|
| ENSMUSG00000078532  | 0.054523515  | 2.486218138  | 0.012061777 | 0.912547273 | 0.999071534 | Nkain1        | Nkain1        | NKAIN1  | 6.667103186 | 5.632554219 | 6.530061373 | 5.134275885 | 3.858751134 | 11.86023233 | 10.03087049 | 3.039627905 | 1.335667137 | 2.548999616 |
| ENSMUSG000000025227 | 0.059680799  | 0.705173938  | 0.012060094 | 0.91255335  | 0.999071534 | Tmem180       | Tmem180       | MFSD13A | 1.403600671 | 1.719411288 | 1.481044848 | 1.665170557 | 1.308051232 | 2.40115133  | 1.229590576 | 1.243484143 | 0.707117896 | 2.0261279   |
| ENSMUSG000000026335 | 0.026167457  | 6.945342501  | 0.012057396 | 0.912563094 | 0.999071534 | Pam           | Pam           | PAM     | 130.6752225 | 144.6084183 | 101.3169316 | 118.2964917 | 139.5036639 | 140.2854474 | 173.6958477 | 98.2352473  | 86.11124599 | 107.6462145 |
| ENSMUSG000000063019 | 0.038397545  | 4.22130184   | 0.01205152  | 0.912584317 | 0.999071534 | Manbal        | Manbal        | MANBAL  | 29.26507399 | 21.93731643 | 13.19476319 | 13.66827499 | 17.39708138 | 29.54143758 | 32.7459385  | 11.88218181 | 9.506807267 | 10.39207536 |
| ENSMUSG00000074676  | -0.088663918 | 0.083826455  | 0.011988745 | 0.912811374 | 0.999071534 | Foxs1         | Foxs1         | FOXs1   | 0.491260235 | 2.134441599 | 0.942483085 | 0.624438959 | 0.719428178 | 2.546675653 | 1.29430587  | 0.207247357 | 0.471411931 | 0.130717929 |
| ENSMUSG00000010057  | -0.0306466   | 3.99894914   | 0.01198799  | 0.912814106 | 0.999071534 | Nprl2         | Nprl2         | NPRL2   | 21.61545033 | 16.89766266 | 15.5509709  | 12.76630761 | 16.67765321 | 12.73337827 | 13.26663516 | 18.03052007 | 14.06378926 | 16.47045906 |
| ENSMUSG000000020840 | 0.037081897  | 5.561687913  | 0.011962203 | 0.912907555 | 0.999071534 | Blmh          | Blmh          | BLMH    | 72.00471441 | 57.8077933  | 34.06403149 | 39.75594705 | 38.71831646 | 85.64106411 | 77.85249806 | 18.65226215 | 20.50641898 | 39.86896835 |
| ENSMUSG000000028668 | -0.025237347 | 5.650346157  | 0.011957833 | 0.912923403 | 0.999071534 | Tceb3         | Tceb3         | TCEB3   | 58.88104814 | 73.10462475 | 40.72873331 | 33.65032168 | 57.75046189 | 67.74157238 | 54.23141594 | 40.82772936 | 38.498641   | 41.89509625 |
| ENSMUSG000000021171 | 0.024568833  | 6.654242922  | 0.01194903  | 0.912955331 | 0.999071534 | Esy12         | Esy12         | ESYT2   | 80.42631844 | 113.0661147 | 94.58490958 | 108.7911431 | 120.2753108 | 119.4754692 | 105.615359  | 105.0744101 | 86.18981464 | 74.24778368 |
| ENSMUSG000000002871 | -0.029717193 | 4.580359177  | 0.011900483 | 0.913131633 | 0.999071534 | Tpra1         | Tpra1         | TPRA1   | 18.80824899 | 20.33648523 | 22.28299293 | 35.45425645 | 26.94585538 | 22.55627007 | 17.60255983 | 27.2875687  | 19.32788915 | 26.1435858  |
| ENSMUSG000000004393 | 0.034366071  | 5.082110074  | 0.011822323 | 0.913416245 | 0.999071534 | Ddx56         | Ddx56         | DDX56   | 54.52988606 | 34.50680584 | 29.21697563 | 24.49188361 | 31.39322957 | 65.19489672 | 44.71826779 | 13.88557293 | 23.57059653 | 24.57497065 |
| ENSMUSG000000093989 | 0.027365431  | 6.29969541   | 0.011776279 | 0.913584353 | 0.999071534 | Rnasek        | Rnasek        | RNASEK  | 58.17924781 | 74.17184555 | 88.59340997 | 81.03830045 | 102.0933987 | 57.4821076  | 64.65057819 | 98.37341221 | 62.4620808  | 94.77049853 |
| ENSMUSG000000058076 | 0.02461279   | 6.680939355  | 0.011766308 | 0.913620803 | 0.999071534 | Sdhc          | Sdhc          | SDHC    | 119.3762371 | 90.35802768 | 99.90320699 | 103.6568672 | 114.4544828 | 107.2514261 | 141.2734857 | 93.67580545 | 66.78335683 | 94.11690889 |
| ENSMUSG000000041132 | -0.042272294 | 2.864243777  | 0.01176565  | 0.913623209 | 0.999071534 | N4bp2l1       | N4bp2l1       | N4BP2L1 | 8.281243958 | 7.233385418 | 8.616988204 | 6.730064335 | 6.801866406 | 6.184783729 | 3.947632902 | 8.980718811 | 9.035395336 | 4.771204409 |
| ENSMUSG000000085315 | 0.08483314   | -0.192710866 | 0.011746889 | 0.913691832 | 0.999071534 | A430018G15Rik | A430018G15Rik |         | 0.350900168 | 0.652190488 | 1.211763966 | 1.110113705 | 0.39241537  | 0.436572969 | 0.517722348 | 0.207247357 | 1.099961171 | 1.30717929  |
| ENSMUSG000000030759 | -0.02478854  | 7.147418968  | 0.011733035 | 0.913742543 | 0.999071534 | Far1          | Far1          | FAR1    | 168.5724406 | 143.1261672 | 130.9378286 | 154.8608618 | 143.6240253 | 163.7876256 | 161.2057961 | 119.6508075 | 108.424744  | 129.4761087 |
| ENSMUSG000000097781 | -0.076276127 | 0.309617736  | 0.01172213  | 0.913782482 | 0.999071534 | 9330136K24Rik | 9330136K24Rik |         | 1.122880537 | 0.948640711 | 1.144443746 | 1.873316877 | 0.784830739 | 0.363810808 | 0.841298815 | 0.345412262 | 1.807079067 | 1.568615148 |
| ENSMUSG000000032902 | -0.027360795 | 6.851870566  | 0.011717928 | 0.913797877 | 0.999071534 | Slc16a1       | Slc16a1       | SLC16A1 | 133.833324  | 110.1016125 | 111.3476444 | 138.3479205 | 109.353083  | 143.1959339 | 172.9839795 | 90.70525999 | 73.1474179  | 81.69870563 |
| ENSMUSG000000028577 | 0.022576283  | 6.41511907   | 0.011701963 | 0.913856392 | 0.999071534 | Plaa          | Plaa          | PLAA    | 81.26847884 | 88.04571594 | 91.0169379  | 81.31582888 | 97.5806219  | 115.6190747 | 86.00662503 | 65.14475261 | 61.75496291 | 93.07116545 |
| ENSMUSG000000039458 | -0.027404178 | 4.248260175  | 0.011661257 | 0.914005768 | 0.999071534 | Mtmr12        | Mtmr12        | MTMR12  | 19.58022936 | 21.7594463  | 20.26338632 | 18.45564034 | 18.9013403  | 29.90524839 | 18.8968657  | 16.92520084 | 10.92104306 | 16.47045906 |
| ENSMUSG000000022419 | -0.032158951 | 4.559265125  | 0.011649538 | 0.914048821 | 0.999071534 | Deptor        | Deptor        | DEPTOR  | 21.68563036 | 19.50642461 | 27.1300488  | 29.55677739 | 24.59136316 | 24.22979979 | 12.81362811 | 15.26722198 | 25.53481291 | 32.48340536 |
| ENSMUSG000000064023 | 0.057144111  | 2.251131288  | 0.011633678 | 0.914107122 | 0.999071534 | Klk8          | Klk8          | KLK8    | 3.789721811 | 6.640484974 | 4.039213221 | 2.358991623 | 6.932671529 | 1.164194584 | 2.135604685 | 7.115492597 | 5.499805857 | 5.686229912 |
| ENSMUSG000000047409 | 0.032043925  | 4.175321204  | 0.01163339  | 0.91410818  | 0.999071534 | Ctdspl        | Ctdspl        | CTDSPL  | 18.52752886 | 15.94902195 | 23.69671756 | 15.26406344 | 18.77053518 | 26.8492376  | 9.836724609 | 13.67832557 | 12.80669078 | 26.27430373 |
| ENSMUSG000000062585 | -0.076928608 | 1.187436118  | 0.011579612 | 0.914306171 | 0.999071534 | Cnr2          | Cnr2          | CNR2    | 2.807201342 | 4.446753331 | 0.673202203 | 1.595788451 | 1.896674286 | 4.947826984 | 2.78275762  | 1.796143762 | 0           | 1.372538255 |
| ENSMUSG000000006095 | -0.027065054 | 6.650834191  | 0.011575807 | 0.914320197 | 0.999071534 | Tbcb          | Tbcb          | TBCB    | 124.6397396 | 69.13219178 | 112.9633297 | 127.3855476 | 89.33989914 | 109.4342909 | 99.92041313 | 67.97713316 | 103.4749188 | 94.90121646 |
| ENSMUSG000000027977 | -0.054345329 | 1.711960782  | 0.011525443 | 0.914506073 | 0.999071534 | Ndst3         | Ndst3         | NDST3   | 3.438821644 | 2.845922132 | 6.328100712 | 2.844666369 | 1.111843547 | 5.23887563  | 2.588611739 | 2.210638477 | 2.749902928 | 2.418281687 |
| ENSMUSG000000068394 | 0.034308915  | 3.347269876  | 0.011516536 | 0.914538988 | 0.999071534 | Cep152        | Cep152        | CEP152  | 8.983044293 | 8.300606217 | 12.5888812  | 10.40731598 | 11.18383803 | 17.17187012 | 7.701119924 | 9.257048621 | 6.285492408 | 10.26135743 |
| ENSMUSG000000031538 | -0.023839067 | 6.301428964  | 0.011466779 | 0.914723097 | 0.999071534 | Plat          | Plat          | PLAT    | 68.98697297 | 98.0064434  | 87.24700556 | 72.57368345 | 85.67735569 | 73.63530746 | 89.69539676 | 86.97480756 | 64.97627777 | 59.14986288 |
| ENSMUSG000000032508 | 0.029678894  | 4.79467667   | 0.011425408 | 0.914876486 | 0.999071534 | Myd88         | Myd88         | MYD88   | 39.65171895 | 30.77153305 | 23.96599844 | 17.83120138 | 30.80460651 | 48.75064822 | 32.87536909 | 22.10638477 | 13.59237733 | 23.33315033 |
| ENSMUSG000000024677 | 0.046287469  | 5.90996603   | 0.011403744 | 0.91495692  | 0.999071534 | Ms4a6b        | Ms4a6b        | MS4A6E  | 105.6911305 | 60.29797516 | 43.96010388 | 42.80875974 | 55.8537876  | 100.4845451 | 139.8497492 | 20.0391119  | 16.73512354 | 34.05202051 |
| ENSMUSG000000024742 | 0.034456889  | 5.610171507  | 0.01134137  | 0.915188935 | 0.999071534 | Fen1          | Fen1          | FEN1    | 68.6360728  | 26.97697021 | 56.27970421 | 43.84949134 | 54.74194406 | 103.4677937 | 55.91401357 | 18.8595095  | 30.17036356 | 42.54868589 |
| ENSMUSG000000094441 | -0.059280326 | 1.878854005  | 0.011336915 | 0.915205531 | 0.999071534 | Zfp955a       | Zfp955a       |         | 4.982782381 | 6.106874574 | 1.817645949 | 1.665170557 | 4.381971627 | 3.638108076 | 7.571689337 | 2.901463001 | 1.885647722 | 0.980384468 |
| ENSMUSG000000089762 | -0.026558106 | 6.304601787  | 0.011324831 | 0.915250564 | 0.999071534 | Ier5l         | Ier5l         | IER5L   | 83.02297968 | 61.83951632 | 91.28621878 | 85.33999106 | 91.43278111 | 83.23991278 | 42.77680899 | 78.47766592 | 82.26138189 | 85.48952557 |
| ENSMUSG000000020326 | 0.024050286  | 6.255137135  | 0.011319447 | 0.915270635 | 0.999071534 | Ccng1         | Ccng1         | CCNG1   | 89.1286426  | 86.02985443 | 65.63721483 | 63.48462749 | 89.86311963 | 76.32750744 | 107.6862483 | 66.59548411 | 55.2376453  | 66.53542587 |
| ENSMUSG000000028926 | 0.027480059  | 4.857433685  | 0.011300107 | 0.915342775 | 0.999071534 | Cdk14         | Cdk14         | CDK14   | 29.12471392 | 37.6491782  | 20.73462787 | 23.65929833 | 37.86808316 | 30.34182135 | 24.00937388 | 39.30791541 | 24.51342039 | 21.69917622 |
| ENSMUSG000000020232 | 0.023189328  | 5.844946213  | 0.01129748  | 0.915352578 | 0.999071534 | Hmg20b        | Hmg20b        | HMG20B  | 60.07410871 | 42.92599215 | 74.05224238 | 60.4318148  | 57.2272414  | 60.75640487 | 46.6597266  | 56.50944606 | 53.03384219 | 60.26096527 |
| ENSMUSG000000003033 | 0.027565911  | 5.462158579  | 0.011296681 | 0.915355562 | 0.999071534 | Ap1m1         | Ap1m1         | AP1M1   | 47.65224277 | 47.43203553 | 37.29540207 | 30.04245214 | 65.27175647 | 61.84783729 | 55.91401357 | 44.21276953 | 19.56359512 | 39.47681456 |
| ENSMUSG000000010721 | 0.034617087  | 3.410534644  | 0.011287331 | 0.915390466 | 0.999071534 | Lmbr1         | Lmbr1         | LMBR1   | 8.91286426  | 11.02794826 | 8.953589305 | 14.77838869 | 9.810384239 | 8.731459383 | 9.448432848 | 12.15851162 | 8.799689371 | 11.56853672 |
| ENSMUSG000000052698 | -0.029519317 | 4.973618044  | 0.011281812 | 0.915411075 | 0.999071534 | Tln2          | Tln2          | TLN2    | 28.07201342 | 38.00491846 | 35.747037   | 27.5446963  | 34.99037045 | 41.47443207 | 13.78435751 | 33.2286596  | 19.72073243 | 43.92122415 |

|                     |              |              |             |             |             |               |               |          |             |             |             |             |             |             |             |             |             |             |
|---------------------|--------------|--------------|-------------|-------------|-------------|---------------|---------------|----------|-------------|-------------|-------------|-------------|-------------|-------------|-------------|-------------|-------------|-------------|
| ENSMUSG00000054693  | -0.025986466 | 7.515139583  | 0.011263836 | 0.91547824  | 0.999071534 | Adam10        | Adam10        | ADAM10   | 145.8341097 | 197.0801076 | 203.5090261 | 207.3831165 | 201.1782795 | 228.400425  | 193.3692969 | 163.1036701 | 148.4161895 | 147.8419777 |
| ENSMUSG00000040010  | 0.029084686  | 5.526829964  | 0.011261974 | 0.915485199 | 0.999071534 | Slc7a5        | Slc7a5        | SLC7A5   | 52.42448506 | 49.38860699 | 48.73983953 | 45.86157243 | 39.76475745 | 96.19157753 | 48.86004658 | 23.0735391  | 29.85608894 | 37.58140459 |
| ENSMUSG00000015889  | -0.024698844 | 6.73979331   | 0.011258803 | 0.915497053 | 0.999071534 | Lta4h         | Lta4h         | LTA4H    | 88.21630216 | 128.2443661 | 107.7796728 | 92.97202278 | 143.2316099 | 110.4529612 | 82.18842272 | 121.4469513 | 89.80397278 | 104.6397022 |
| ENSMUSG00000039183  | 0.03139385   | 4.869114333  | 0.011257793 | 0.915500832 | 0.999071534 | Nubp2         | Nubp2         | NUBP2    | 39.23063875 | 28.69638149 | 25.37972307 | 22.34103831 | 34.59795508 | 43.14796178 | 49.18362304 | 17.2706131  | 13.98522061 | 23.52922722 |
| ENSMUSG00000045441  | 0.126934186  | -0.676962849 | 0.011251728 | 0.915523509 | 0.999071534 | Gprin3        | Gprin3        | GPRIN3   | 0.631620302 | 0.711480533 | 0.06732022  | 0           | 1.046440986 | 1.309718907 | 0.906014109 | 0           | 0.392843275 | 0           |
| ENSMUSG00000020467  | -0.153427718 | -0.690212225 | 0.011246829 | 0.915541835 | 0.999071534 | Efemp1        | Efemp1        | EFEMP1   | 1.614140771 | 0.711480533 | 0           | 0           | 0.327012808 | 1.236956746 | 1.164875283 | 0           | 0           | 0           |
| ENSMUSG00000097944  | -0.053015264 | 1.48680554   | 0.011245957 | 0.915545095 | 0.999071534 | A130014A01Rik | A130014A01Rik |          | 2.947561409 | 1.956571465 | 2.894769475 | 3.885397967 | 2.354492217 | 2.473913492 | 1.423736457 | 3.315957715 | 3.457020824 | 1.633974113 |
| ENSMUSG00000031600  | -0.021737682 | 5.683478863  | 0.011241063 | 0.915563407 | 0.999071534 | Vps37a        | Vps37a        | VPS37A   | 49.19620351 | 48.32138619 | 58.5685917  | 58.90540846 | 52.32204928 | 51.51561036 | 46.78915719 | 54.16064268 | 43.68417223 | 48.10419788 |
| ENSMUSG00000043131  | 0.030211917  | 6.983216674  | 0.011206101 | 0.915694324 | 0.999071534 | Mob1a         | Mob1a         | MOB1A    | 148.9922112 | 183.0876571 | 89.93981438 | 90.26612062 | 141.1387279 | 198.2768901 | 180.2320923 | 100.5149682 | 71.96888807 | 86.33919211 |
| ENSMUSG00000024383  | 0.025794016  | 5.061180546  | 0.011184027 | 0.915777089 | 0.999071534 | Map3k2        | Map3k2        | MAP3K2   | 29.82651426 | 53.77607028 | 23.1581558  | 30.38936267 | 34.27094228 | 41.11062126 | 34.94625848 | 34.81755601 | 23.72773384 | 29.15009817 |
| ENSMUSG00000040078  | 0.189203695  | 3.628797829  | 0.011153028 | 0.915893458 | 0.999071534 | Gm9769        | Gm9769        |          | 28.14219345 | 32.25378416 | 0           | 0           | 0           | 33.4705943  | 36.30527964 | 0           | 0           | 0           |
| ENSMUSG00000030216  | 0.024167887  | 5.268346518  | 0.011129807 | 0.915980735 | 0.999071534 | Wbp11         | Wbp11         | WBP11    | 40.00261912 | 37.82704833 | 40.66141309 | 31.91576901 | 48.00548021 | 67.81433454 | 32.7459385  | 34.6793911  | 27.26332332 | 30.45727746 |
| ENSMUSG00000037683  | 0.103505307  | -0.156573661 | 0.011126725 | 0.915992328 | 0.999071534 | Armc3         | Armc3         | ARMC3    | 0.842160403 | 0.296450222 | 0.269280881 | 2.289609516 | 0.065402562 | 0.9459081   | 0.970729402 | 0.690824524 | 1.178529826 | 0           |
| ENSMUSG00000030105  | -0.023193721 | 6.775541714  | 0.011105636 | 0.916071681 | 0.999071534 | Ar18b         | Ar18b         | ARL8B    | 93.54998471 | 129.6673271 | 107.5777121 | 119.5453696 | 121.5179594 | 113.4362098 | 119.9821541 | 112.4662325 | 77.8615372  | 102.1560615 |
| ENSMUSG00000083993  | -0.116805475 | -0.380535242 | 0.01109288  | 0.916119719 | 0.999071534 | Gm14398       | Gm14398       |          | 0.771980369 | 1.304380977 | 0.605881983 | 0           | 0.719428178 | 1.819054038 | 1.035444696 | 0.345412262 | 0           | 0           |
| ENSMUSG00000066456  | 0.03205085   | 5.01429479   | 0.011089182 | 0.916133648 | 0.999071534 | Hmgn3         | Hmgn3         | HMGN3    | 28.00183338 | 13.69600026 | 46.3163116  | 43.15567027 | 32.83208592 | 37.90908615 | 36.7582867  | 19.41216912 | 30.32750087 | 32.74484122 |
| ENSMUSG00000044707  | -0.082014072 | -0.052291423 | 0.011076459 | 0.916181598 | 0.999071534 | Ccn1j         | Ccn1j         | CCNJL    | 0.912340436 | 1.363671021 | 1.144443746 | 0.416292639 | 0.588623054 | 0.873145938 | 0.841298815 | 0.069082452 | 0.392843275 | 1.764692042 |
| ENSMUSG00000044566  | -0.049549616 | 2.078936944  | 0.011072183 | 0.916197716 | 0.999071534 | Cage1         | Cage1         | CAGE1    | 3.789721811 | 3.616692709 | 5.789538949 | 4.440454819 | 3.924153696 | 2.764962138 | 1.617882337 | 5.319348834 | 5.499805857 | 3.986666154 |
| ENSMUSG00000048578  | -0.033642491 | 7.545384338  | 0.011059199 | 0.916246686 | 0.999071534 | Mlec          | Mlec          | MLEC     | 249.7005593 | 247.3580653 | 143.8633109 | 158.3993493 | 185.1546519 | 310.3306189 | 289.536223  | 100.8603805 | 93.33956226 | 135.6852103 |
| ENSMUSG00000050761  | 0.060320515  | 3.28353575   | 0.011059127 | 0.916246959 | 0.999071534 | Gp1bb         | Gp1bb         | GP1BB    | 4.56170218  | 4.861783641 | 19.32090324 | 11.86434022 | 7.78290483  | 4.220205368 | 1.100159989 | 11.74401691 | 11.94243557 | 16.07830527 |
| ENSMUSG00000068479  | 0.026018756  | 5.371101299  | 0.011055816 | 0.916259449 | 0.999071534 | Mfap1a        | Mfap1a        | MFAP1    | 26.73859278 | 52.88671961 | 32.65030687 | 41.2823534  | 58.86230544 | 49.76931848 | 33.52252202 | 45.73258348 | 36.45585597 | 35.55527669 |
| ENSMUSG00000045362  | 0.047389174  | 2.070745317  | 0.011041651 | 0.916312915 | 0.999071534 | Tnfrsf26      | Tnfrsf26      |          | 4.56170218  | 7.055515284 | 3.433331237 | 2.358991623 | 3.466335765 | 3.638108076 | 4.788931717 | 6.010173358 | 1.964216377 | 3.660102012 |
| ENSMUSG000000334858 | -0.048920867 | 2.111060951  | 0.011018753 | 0.916399416 | 0.999071534 | Fam214a       | Fam214a       | FAM214A  | 2.38612114  | 5.276813952 | 3.164050356 | 5.550568524 | 5.624620297 | 4.365729691 | 1.876743511 | 6.839162787 | 2.592765618 | 4.248332693 |
| ENSMUSG00000090641  | -0.0801645   | 0.173206542  | 0.011012566 | 0.916422804 | 0.999071534 | Zfp712        | Zfp712        |          | 0.701800335 | 2.430891821 | 0.403921322 | 0.277528426 | 1.504258917 | 0.800383777 | 1.29430587  | 1.796143762 | 0.31427462  | 0.457512752 |
| ENSMUSG00000036745  | -0.026121856 | 4.633615204  | 0.011001779 | 0.916463598 | 0.999071534 | Ttlf7         | Ttlf7         | TTL7     | 22.45761073 | 31.00869322 | 21.27318963 | 27.05902155 | 27.46907587 | 34.70755105 | 28.28058325 | 23.76436362 | 12.41384751 | 22.35276586 |
| ENSMUSG00000035242  | -0.037039683 | 9.539319885  | 0.010964821 | 0.916603514 | 0.999071534 | Oaz1          | Oaz1          | OAZ1     | 1200.569834 | 774.5058501 | 548.1885542 | 651.5673626 | 754.7455608 | 899.8496515 | 1431.243431 | 468.1717799 | 283.2400016 | 578.4921948 |
| ENSMUSG00000097715  | -0.050183289 | 2.685377208  | 0.010948669 | 0.916664737 | 0.999071534 | Gpr137b-ps    | Gpr137b-ps    |          | 3.579181711 | 12.80664959 | 5.587578288 | 6.313771696 | 4.90519212  | 6.621356699 | 5.177223478 | 12.22759407 | 3.614158135 | 2.352922722 |
| ENSMUSG00000006641  | -0.049874278 | 2.560813651  | 0.010945331 | 0.916677397 | 0.999071534 | Slc5a6        | Slc5a6        | SLC5A6   | 7.649623656 | 4.03172302  | 6.126140051 | 6.521918016 | 6.082438228 | 11.27813504 | 8.154126978 | 3.45412262  | 0.864255206 | 5.490153018 |
| ENSMUSG00000021488  | 0.023187326  | 5.551429369  | 0.01092486  | 0.916755066 | 0.999071534 | Nsd1          | Nsd1          | NSD1     | 44.70468137 | 47.84706584 | 46.92219358 | 46.06971875 | 55.39596967 | 67.15947509 | 28.41001384 | 44.21276953 | 40.61999469 | 49.60745406 |
| ENSMUSG00000036371  | 0.028893051  | 8.882807434  | 0.010902059 | 0.916841666 | 0.999071534 | Serbp1        | Serbp1        | SERBP1   | 429.6421653 | 358.7640587 | 620.9617124 | 533.0627246 | 474.103169  | 675.1600968 | 406.6061889 | 322.6841351 | 440.2987432 | 477.8393895 |
| ENSMUSG00000004565  | 0.023123697  | 4.733129637  | 0.010876936 | 0.916937191 | 0.999071534 | Pnpla6        | Pnpla6        | PNPLA6   | 26.10697248 | 26.85839012 | 27.66861056 | 27.89160683 | 27.59988099 | 29.10486461 | 22.65035272 | 26.04408455 | 20.74212495 | 30.52263642 |
| ENSMUSG000000041849 | 0.037672538  | 3.005351258  | 0.010845836 | 0.917055594 | 0.999071534 | Card6         | Card6         | CARD6    | 7.93034379  | 10.90936817 | 8.415027543 | 5.273040098 | 8.109917638 | 11.3508972  | 4.465355525 | 6.977327692 | 5.892649132 | 10.58815225 |
| ENSMUSG00000032076  | -0.023145629 | 4.911375626  | 0.010834976 | 0.917096983 | 0.999071534 | Cadm1         | Cadm1         | CADM1    | 33.82677617 | 26.08761954 | 26.99540836 | 37.119427   | 32.30886543 | 32.01535107 | 29.18659736 | 30.94893867 | 23.88487115 | 27.45076509 |
| ENSMUSG000000060090 | 0.023288517  | 6.031291043  | 0.010815688 | 0.917170539 | 0.999071534 | Rp2h          | Rp2           | RP2      | 69.12733304 | 63.20318734 | 61.73264205 | 69.38210655 | 72.53144081 | 71.6707291  | 95.19619671 | 55.33504437 | 45.4912513  | 52.67932539 |
| ENSMUSG00000002210  | -0.025713416 | 4.124564514  | 0.010802788 | 0.917219771 | 0.999071534 | Smg9          | Smg9          | SMG9     | 18.24680872 | 17.31269297 | 18.8496617  | 17.83120138 | 18.37811981 | 23.64770249 | 15.59638573 | 15.33630443 | 14.6923385  | 14.37897219 |
| ENSMUSG00000054641  | 0.159201201  | -0.322316462 | 0.010796091 | 0.917245342 | 0.999071534 | Mmrn1         | Mmrn1         | MMRN1    | 0           | 0           | 3.231370576 | 0           | 0           | 0.218286485 | 0.19414588  | 0.828989429 | 0           | 2.156845829 |
| ENSMUSG00000031984  | 0.034823091  | 4.507642986  | 0.010775644 | 0.917323464 | 0.999071534 | 2810004N23Rik | 2810004N23Rik | C1orf131 | 28.07201342 | 28.16277109 | 16.5607742  | 19.0800793  | 24.59136316 | 34.48926456 | 41.22364195 | 10.1551205  | 14.45663254 | 13.59466462 |
| ENSMUSG00000051786  | 0.030889985  | 3.854058696  | 0.010749386 | 0.917423897 | 0.999071534 | Tubgc p6      | Tubgc p6      | TUBGCP6  | 16.56248792 | 17.4905631  | 11.5790779  | 9.991023343 | 18.44352237 | 25.61228086 | 12.29590576 | 10.98410993 | 10.68533709 | 12.54892118 |
| ENSMUSG00000074001  | 0.041311949  | 2.580836825  | 0.010714047 | 0.917559261 | 0.999071534 | Klhl40        | Klhl40        | KLHL40   | 4.280982046 | 5.336103997 | 5.250977187 | 9.574730704 | 5.166802366 | 5.384399953 | 4.788931717 | 4.697606763 | 6.678335683 | 6.53589645  |

|                    |              |              |             |             |             |               |               |          |             |             |             |             |             |             |             |             |             |             |
|--------------------|--------------|--------------|-------------|-------------|-------------|---------------|---------------|----------|-------------|-------------|-------------|-------------|-------------|-------------|-------------|-------------|-------------|-------------|
| ENSMUSG00000026785 | 0.034124591  | 3.488162686  | 0.010677299 | 0.917700259 | 0.999071534 | Pkn3          | Pkn3          | PKN3     | 15.15888725 | 6.521904885 | 11.30979702 | 11.10113705 | 12.88430463 | 16.00767553 | 10.35444696 | 7.599069763 | 7.385453579 | 14.05217737 |
| ENSMUSG00000078622 | 0.022824547  | 6.573178391  | 0.010675297 | 0.917707949 | 0.999071534 | Ccdc47        | Ccdc47        | CCDC47   | 79.0928978  | 114.6076558 | 91.89210077 | 97.41247759 | 106.4753703 | 96.40986402 | 113.1870483 | 96.16277373 | 77.54726258 | 78.30003948 |
| ENSMUSG00000020694 | 0.024280119  | 5.388796589  | 0.010670416 | 0.917726696 | 0.999071534 | Tlk2          | Tlk2          | TLK2     | 46.73990234 | 59.17146432 | 40.93069397 | 26.4345826  | 43.03488553 | 45.54911311 | 36.56414082 | 51.88092175 | 30.24893221 | 39.73825042 |
| ENSMUSG00000042439 | -0.027843781 | 4.260535033  | 0.010661639 | 0.91776042  | 0.999071534 | Zfp532        | Zfp532        | ZNF532   | 20.21184966 | 20.09932505 | 24.70652087 | 14.98653501 | 20.01318385 | 24.37532411 | 11.06631518 | 22.17546722 | 15.87086833 | 17.97371524 |
| ENSMUSG00000077222 | 0.073930752  | 0.21912287   | 0.010619745 | 0.917921586 | 0.999071534 | Gm22270       | Gm22270       |          | 1.543960738 | 0.296450222 | 2.221567271 | 0.485674746 | 0.719428178 | 1.018670261 | 0.647152935 | 0.621742072 | 1.414235792 | 1.30717929  |
| ENSMUSG00000028246 | -0.05039064  | 2.034598947  | 0.010608849 | 0.917963555 | 0.999071534 | Faxc          | Faxc          | FAXC     | 3.649361744 | 6.581194929 | 2.894769475 | 4.232308499 | 3.531738326 | 9.531843159 | 3.882917609 | 1.4507315   | 1.964216377 | 3.267948225 |
| ENSMUSG00000051998 | 0.082354402  | 0.186714751  | 0.010592104 | 0.918028094 | 0.999071534 | Lax1          | Lax1          | LAX1     | 0.631620302 | 1.600831199 | 1.077123525 | 0.555056852 | 1.24264867  | 1.091432423 | 0.258861174 | 2.210638477 | 1.257098482 | 0.065358965 |
| ENSMUSG00000037656 | -0.039297586 | 4.958347236  | 0.010582085 | 0.918066735 | 0.999071534 | Slc20a2       | Slc20a2       | SLC20A2  | 50.24890402 | 34.9811262  | 21.20586941 | 28.72419211 | 28.31930917 | 61.99336162 | 53.71369359 | 12.36575898 | 14.22092657 | 13.9868184  |
| ENSMUSG00000021540 | 0.022246898  | 6.321468568  | 0.010552362 | 0.918181477 | 0.999071534 | Smad5         | Smad5         | SMAD5    | 83.72478002 | 79.21149933 | 86.91040446 | 75.55711403 | 86.26597875 | 123.1863395 | 90.86027204 | 58.85824944 | 57.27654957 | 67.90796412 |
| ENSMUSG00000083166 | 0.086755416  | -0.15020067  | 0.010544476 | 0.91821195  | 0.999071534 | Gm8648        | Gm8648        |          | 0.491260235 | 0.5336104   | 1.750325729 | 0           | 1.111843547 | 0.873145938 | 0.906014109 | 1.243484143 | 0.31427462  | 0.522871716 |
| ENSMUSG00000043284 | 0.020868225  | 5.336464288  | 0.01047299  | 0.91848869  | 0.999071534 | Tmem11        | Tmem11        | TMEM11   | 40.49387935 | 38.30136869 | 47.59539578 | 36.91128068 | 44.47374189 | 45.33082663 | 44.84769838 | 36.40645241 | 28.99183373 | 41.69901935 |
| ENSMUSG00000059834 | 0.028581322  | 3.858070646  | 0.010472241 | 0.918491595 | 0.999071534 | Scrt1         | Scrt1         | SCLT1    | 17.33446828 | 10.85007813 | 18.31109993 | 13.11321814 | 14.32316099 | 18.48158903 | 17.08483748 | 11.81309936 | 10.52819978 | 13.0717929  |
| ENSMUSG00000054309 | -0.022564828 | 5.41796428   | 0.010445597 | 0.918594988 | 0.999071534 | Cpsf3         | Cpsf3         | CPSF3    | 42.10802013 | 37.1155678  | 59.71303544 | 39.33965441 | 44.73535213 | 59.44668596 | 35.722842   | 34.47214374 | 34.72734555 | 42.48332693 |
| ENSMUSG00000033021 | -0.022485638 | 5.298195267  | 0.010421381 | 0.918689074 | 0.999071534 | Gmppa         | Gmppa         | GMPPA    | 41.05531962 | 49.86292735 | 31.64050356 | 35.17672802 | 48.07088277 | 41.40166991 | 35.91698788 | 46.69973782 | 27.10618601 | 37.45068666 |
| ENSMUSG00000073724 | 0.0641148    | 0.608601661  | 0.010401423 | 0.918766702 | 0.999071534 | Pramel4       | Pramel4       | PRAMEF25 | 2.245761073 | 0.474320355 | 2.625488593 | 0.971349492 | 0.784830739 | 1.528005392 | 1.359021163 | 0.828989429 | 1.649941757 | 1.437897219 |
| ENSMUSG00000046109 | 0.14074795   | -0.85418226  | 0.010392445 | 0.918801647 | 0.999071534 | AB041806      | AB041806      |          | 0.210540101 | 0           | 0.538561763 | 1.318260024 | 0.065402562 | 0.145524323 | 0           | 0.138164905 | 1.649941757 | 0           |
| ENSMUSG00000042523 | -0.034591375 | 3.240932258  | 0.01039032  | 0.918809921 | 0.999071534 | Dnal1         | Dnal1         | DNAL1    | 7.228543455 | 13.39955004 | 7.270583797 | 9.85225913  | 11.18383803 | 10.33222694 | 6.989251696 | 11.32952219 | 8.406486095 | 7.189486096 |
| ENSMUSG00000025040 | 0.022681988  | 5.835988948  | 0.010365    | 0.918908566 | 0.999071534 | Fundc1        | Fundc1        | FUNDC1   | 55.51240653 | 55.6733517  | 56.41434465 | 58.35035161 | 67.62624869 | 53.11637791 | 82.77086036 | 54.98963211 | 36.69156193 | 50.84927438 |
| ENSMUSG00000055676 | -0.081576504 | -0.085237371 | 0.010357509 | 0.918937772 | 0.999071534 | Gm5069        | Gm5069        |          | 0.350900168 | 1.304380977 | 0.538561763 | 0.971349492 | 1.111843547 | 0.363810808 | 0.453007054 | 1.312566595 | 0.078568655 | 1.568615148 |
| ENSMUSG00000027663 | 0.028561646  | 4.593072103  | 0.010336076 | 0.919021399 | 0.999071534 | Zmat3         | Zmat3         | ZMAT3    | 22.94887097 | 23.95317794 | 28.20717232 | 28.09975315 | 19.62076848 | 35.94450779 | 13.07248928 | 17.20153065 | 23.80630249 | 27.97363681 |
| ENSMUSG00000025278 | -0.030712925 | 8.520439744  | 0.010313315 | 0.919110303 | 0.999071534 | Flnb          | Flnb          | FLNB     | 287.6679575 | 539.1836638 | 358.1435722 | 298.6205866 | 448.9885854 | 397.4996884 | 220.3555743 | 550.4489807 | 249.219774  | 340.585564  |
| ENSMUSG00000079037 | -0.028292053 | 6.987403926  | 0.010295066 | 0.919181655 | 0.999071534 | Prnp          | Prnp          | PRNP     | 78.18055737 | 144.3119681 | 160.2894446 | 121.3493044 | 160.2362759 | 99.90244777 | 105.2917825 | 180.7887779 | 93.2609936  | 120.1297768 |
| ENSMUSG00000044224 | -0.02270252  | 5.717563444  | 0.010282401 | 0.91923121  | 0.999071534 | Dnajc21       | Dnajc21       | DNAJC21  | 44.21342113 | 69.66580218 | 51.49996856 | 42.73937763 | 67.49544357 | 51.87942117 | 44.20054545 | 59.96356868 | 36.84869924 | 58.75770909 |
| ENSMUSG00000073878 | -0.189324492 | -0.989463933 | 0.010266185 | 0.919294706 | 0.999071534 | Gm13304       | Gm13304       | CCL21    | 0           | 0           | 0.201960661 | 0           | 0           | 0           | 0           | 0.207247357 | 0           | 1.437897219 |
| ENSMUSG00000020844 | -0.021309246 | 5.829044732  | 0.010246511 | 0.919371812 | 0.999071534 | Nxn           | Nxn           | NXN      | 58.88104814 | 68.59858138 | 62.80976558 | 46.76353981 | 60.43196691 | 70.87034532 | 69.24536402 | 54.29880758 | 33.941659   | 48.4309927  |
| ENSMUSG00000034379 | 0.06541171   | 0.243509391  | 0.010246435 | 0.919372111 | 0.999071534 | Wdr5b         | Wdr5b         | WDR5B    | 1.543960738 | 0.889350666 | 1.211763966 | 1.110113705 | 0.588623054 | 1.164194584 | 0.711868228 | 1.381649048 | 1.335667137 | 0.522871716 |
| ENSMUSG00000082433 | -0.077921842 | 2.504960515  | 0.01024579  | 0.919374637 | 0.999071534 | Gm9025        | Gm9025        |          | 15.08870721 | 9.54569715  | 2.086926831 | 0.138764213 | 3.204725518 | 12.22404314 | 9.060141087 | 0.759906976 | 1.178529826 | 4.901922338 |
| ENSMUSG00000036932 | -0.022493655 | 5.898107643  | 0.010243878 | 0.919382136 | 0.999071534 | Alfm1         | Alfm1         | ALFM1    | 57.05636727 | 57.74850325 | 66.04113616 | 54.53433575 | 76.58639963 | 89.49745867 | 72.93413575 | 47.18331499 | 34.49163959 | 49.60745406 |
| ENSMUSG00000061119 | -0.032329959 | 4.902506232  | 0.010229527 | 0.919438434 | 0.999071534 | Prcp          | Prcp          | PRCP     | 43.16072063 | 36.16692709 | 24.97580175 | 26.29581838 | 26.2264272  | 48.67788606 | 46.27143484 | 11.05319238 | 18.46363395 | 22.94099654 |
| ENSMUSG00000056131 | -0.024765856 | 4.535482297  | 0.010225359 | 0.91945479  | 0.999071534 | Pgm3          | Pgm3          | PGM3     | 20.35220973 | 21.52228612 | 24.57188042 | 29.48739528 | 24.26435035 | 27.7951457  | 22.19734566 | 25.00784777 | 14.06378926 | 22.87563758 |
| ENSMUSG00000008604 | -0.022598008 | 6.157133331  | 0.010211802 | 0.919508023 | 0.999071534 | Ubqln4        | Ubqln4        | UBQLN4   | 87.51450183 | 72.92675462 | 72.77315819 | 61.33378219 | 79.33330722 | 119.6209935 | 61.60895939 | 51.74275684 | 56.49086302 | 60.65311906 |
| ENSMUSG00000022389 | -0.025703548 | 5.242771563  | 0.010206509 | 0.919528814 | 0.999071534 | Tef           | Tef           | TEF      | 29.61597415 | 41.384451   | 44.0274241  | 51.82843359 | 29.23494503 | 56.09962653 | 23.94465859 | 36.68278222 | 30.32750087 | 36.33958426 |
| ENSMUSG00000038894 | -0.041884767 | 4.077853218  | 0.010201357 | 0.919549056 | 0.999071534 | Irs2          | Irs2          | IRS2     | 11.64988557 | 25.37613901 | 19.25358302 | 15.81912029 | 16.08903015 | 17.31739444 | 3.753487022 | 30.74169132 | 8.485414751 | 19.93448417 |
| ENSMUSG00000002944 | -0.070200391 | 2.515974836  | 0.010197101 | 0.919565785 | 0.999071534 | Cd36          | Cd36          | CD36     | 12.07096577 | 8.182026128 | 3.231370576 | 2.150845303 | 4.381971627 | 14.62519447 | 11.38989165 | 0.621742072 | 0.707117896 | 1.633974113 |
| ENSMUSG00000039738 | 0.028521661  | 4.059273834  | 0.010195784 | 0.919570962 | 0.999071534 | Slx4          | Slx4          | SLX4     | 14.52726694 | 20.09932505 | 19.79214478 | 15.12529923 | 15.43500454 | 25.17570789 | 9.642578728 | 15.61263424 | 15.24231909 | 15.88222837 |
| ENSMUSG00000020372 | 0.027755867  | 10.51260744  | 0.010179252 | 0.919635973 | 0.999071534 | Gnb2l1        | Rack1         | RACK1    | 1909.598713 | 1648.559685 | 1301.097899 | 1325.059471 | 1342.71459  | 1296.257908 | 2113.989777 | 1342.410215 | 1043.784583 | 1317.571365 |
| ENSMUSG00000049988 | -0.072545078 | 2.938632083  | 0.010176134 | 0.919648239 | 0.999071534 | Lrrc25        | Lrrc25        | LRRC25   | 11.7200656  | 10.0200175  | 5.318297407 | 5.203657991 | 8.044515076 | 18.19054038 | 15.46695514 | 2.901463001 | 0           | 2.418281687 |
| ENSMUSG00000086841 | -0.030039641 | 6.998057486  | 0.010155039 | 0.919731287 | 0.999071534 | 2410006H16Rik | 2410006H16Rik |          | 126.8855006 | 175.4985314 | 125.1482896 | 123.4307676 | 119.1634672 | 62.79374539 | 136.4845539 | 178.9926342 | 82.73279382 | 138.5610048 |
| ENSMUSG00000039298 | 0.027813442  | 4.272489136  | 0.01011104  | 0.919907304 | 0.999071534 | Cdk5rap2      | Cdk5rap2      | CDK5RAP2 | 16.14140771 | 25.13897883 | 20.06142566 | 16.9986161  | 20.47100178 | 32.5246862  | 11.84289871 | 19.82666384 | 12.33527885 | 19.93448417 |

|                    |              |              |             |             |             |               |               |         |             |             |             |             |              |             |             |             |             |             |
|--------------------|--------------|--------------|-------------|-------------|-------------|---------------|---------------|---------|-------------|-------------|-------------|-------------|--------------|-------------|-------------|-------------|-------------|-------------|
| ENSMUSG00000018761 | 0.036569539  | 5.398996903  | 0.010101204 | 0.919943613 | 0.999071534 | Mpdu1         | Mpdu1         | MPDU1   | 76.28569646 | 37.41201802 | 36.55487965 | 31.84638691 | 34.72876021  | 57.91868057 | 83.93573564 | 27.2875687  | 11.47102364 | 33.92130258 |
| ENSMUSG00000018774 | 0.027706524  | 6.023410039  | 0.01009262  | 0.919977523 | 0.999071534 | Cd68          | Cd68          | CD68    | 64.56563086 | 84.2511531  | 59.10715346 | 47.11045035 | 80.57595589  | 74.94502637 | 101.7971566 | 69.3587822  | 26.16336215 | 51.89501782 |
| ENSMUSG00000093629 | -0.08858988  | -0.41114867  | 0.010071499 | 0.92006102  | 0.999071534 | Gm19357       | Prox2os       |         | 0.280720134 | 0.355740266 | 1.615685288 | 0.416292639 | 0.654025616  | 0.072762162 | 0.19414588  | 1.174401691 | 0.549980586 | 0.784307574 |
| ENSMUSG00000034906 | -0.025327635 | 4.865998492  | 0.010065402 | 0.920085139 | 0.999071534 | Ncaph         | Ncaph         | NCAPH   | 29.89669429 | 22.47092683 | 34.46795281 | 28.44666369 | 36.88704474  | 48.0230266  | 33.13423026 | 20.72473572 | 20.58498764 | 20.58807382 |
| ENSMUSG00000069792 | 0.046055986  | 4.50366111   | 0.010059373 | 0.920108995 | 0.999071534 | Wfdc17        | Wfdc17        |         | 43.16072063 | 22.88595714 | 15.01240914 | 23.72868044 | 10.46440986  | 19.35473496 | 57.20831944 | 19.68849893 | 7.6997282   | 8.758101244 |
| ENSMUSG00000025429 | 0.082857524  | 0.664563118  | 0.01004702  | 0.920157897 | 0.999071534 | Pstpip2       | Pstpip2       | PSTPIP2 | 3.509001677 | 1.185800888 | 0.605881983 | 1.179495811 | 0.850233301  | 4.147443207 | 2.523896446 | 0.690824524 | 0.471411931 | 0           |
| ENSMUSG00000022848 | -0.029270313 | 4.118228954  | 0.01004416  | 0.920169225 | 0.999071534 | Dirc2         | Dirc2         | DIRC2   | 18.17662869 | 25.43542905 | 9.222870187 | 20.05142879 | 17.39708138  | 17.60844309 | 18.70271982 | 18.37593234 | 11.78529826 | 16.2090232  |
| ENSMUSG00000042087 | 0.10912149   | -0.520294044 | 0.010041528 | 0.920179652 | 0.999071534 | 4933440N22Rik | 4933440N22Rik |         | 0           | 0.296450222 | 1.144443746 | 0.901967385 | 0.39241537   | 1.091432423 | 0.258861174 | 0.069082452 | 0           | 1.568615148 |
| ENSMUSG00000032299 | -0.021179552 | 5.448963034  | 0.010035589 | 0.920203181 | 0.999071534 | Commmd4       | Commmd4       | COMMMD4 | 56.84582717 | 40.73226051 | 43.21958146 | 44.5433124  | 42.51166504  | 43.8755834  | 43.6828231  | 43.17653275 | 29.69895163 | 49.08458234 |
| ENSMUSG00000049422 | 0.0631759    | 1.766213592  | 0.009994609 | 0.92036573  | 0.999071534 | Chchd10       | Chchd10       | CHCHD10 | 4.210802013 | 3.320242487 | 3.567971678 | 2.081463196 | 3.466335765  | 4.875064822 | 6.730390522 | 3.937699786 | 0.078568655 | 1.30717929  |
| ENSMUSG00000039193 | 0.061239001  | 0.503267672  | 0.009984266 | 0.920406808 | 0.999071534 | Nlrc4         | Nlrc4         | NLR4    | 1.333420637 | 2.134441599 | 1.346404407 | 0.555056852 | 1.177246109  | 2.837724299 | 1.100159989 | 0.759906976 | 1.099961171 | 0.784307574 |
| ENSMUSG00000020015 | 0.021519556  | 5.947221522  | 0.009979482 | 0.920425815 | 0.999071534 | Cdk17         | Cdk17         | CDK17   | 60.42500888 | 61.18732583 | 63.81956888 | 58.2809695  | 73.9048946   | 59.08287516 | 58.37319472 | 80.06656232 | 45.01983937 | 56.14335051 |
| ENSMUSG00000094686 | -0.174795    | 2.863190492  | 0.009964762 | 0.920484327 | 0.999071534 | Ccl21a        | Ccl21a        | CCL21   | 0           | 0           | 39.11304802 | 0           | 0            | 0           | 0.129430587 | 2.970545453 | 0.31427462  | 28.95402128 |
| ENSMUSG00000005621 | -0.026253122 | 4.298784537  | 0.00994462  | 0.920564465 | 0.999071534 | Zfp592        | Zfp592        | ZNF592  | 19.15914916 | 24.54607838 | 21.00390875 | 14.01518552 | 24.19894779  | 29.54143758 | 14.43151045 | 21.55372515 | 12.17814154 | 18.16979213 |
| ENSMUSG00000039232 | -0.032834971 | 3.120723622  | 0.009944045 | 0.920566756 | 0.999071534 | Stx11         | Stx11         | STX11   | 8.211063924 | 8.419186306 | 10.70391503 | 8.325852786 | 9.287163747  | 7.785551283 | 9.513148141 | 8.289894287 | 8.17114013  | 6.601255415 |
| ENSMUSG00000026546 | -0.080801991 | -0.1048472   | 0.009914423 | 0.920684764 | 0.999071534 | Ccdc19        | Cfap45        | CFAP45  | 0.771980369 | 0.652190488 | 0.740522424 | 1.387642131 | 0.654025616  | 1.382481069 | 1.29430587  | 0           | 0.707117896 | 0.457512752 |
| ENSMUSG00000053398 | -0.033001839 | 7.713846681  | 0.009902901 | 0.92073071  | 0.999071534 | Phgdh         | Phgdh         | PHGDH   | 296.8615419 | 154.7470159 | 245.4495234 | 196.62889   | 209.6806125  | 383.2383047 | 300.5378229 | 91.39608452 | 126.3383974 | 145.2929781 |
| ENSMUSG00000090124 | -0.1096169   | 2.459208121  | 0.009894542 | 0.920764063 | 0.999071534 | Ugt1a7c       | Ugt1a7c       |         | 10.456825   | 15.83044186 | 0           | 0           | 3.073920395  | 9.313556675 | 15.20809397 | 0.414494714 | 0.864255206 | 0.784307574 |
| ENSMUSG00000073422 | 0.034141002  | 3.772479156  | 0.009823612 | 0.921047648 | 0.999071534 | H2-Ke6        | H2-Ke6        | HSD17B8 | 22.52779077 | 8.122736084 | 9.694111729 | 16.85985189 | 12.0994739   | 14.26138366 | 13.39606575 | 7.737234668 | 13.67045999 | 16.53581802 |
| ENSMUSG00000022337 | -0.02268294  | 6.050084083  | 0.009821349 | 0.921056714 | 0.999071534 | Emc2          | Emc2          | EMC2    | 79.86487817 | 66.64200991 | 59.98231632 | 73.33688662 | 65.952578209 | 80.54771281 | 82.44728389 | 45.73258348 | 37.94866041 | 76.53534744 |
| ENSMUSG00000097658 | 0.089838253  | -0.410418725 | 0.009815219 | 0.921081272 | 0.999071534 | Gm16755       | Gm16755       |         | 1.263240604 | 0.592900444 | 0.134640441 | 0.555056852 | 0.654025616  | 0.072762162 | 0.388291761 | 0.414494714 | 1.571373102 | 0.392153787 |
| ENSMUSG00000062761 | 0.025386048  | 4.896300184  | 0.009788098 | 0.921190025 | 0.999071534 | Zfp512        | Zfp512        | ZNF512  | 29.40543405 | 22.8266671  | 36.01631788 | 26.08767206 | 38.52210878  | 25.61228086 | 21.03247038 | 36.26828751 | 23.3489056  | 36.86245598 |
| ENSMUSG00000025362 | -0.02835148  | 10.46991627  | 0.009781199 | 0.921217712 | 0.999071534 | Rps26         | Rps26         | RPS26   | 1401.14437  | 1022.041785 | 1755.240105 | 1786.103569 | 1433.035527  | 1082.555439 | 1208.558106 | 1424.272921 | 1241.699025 | 1712.666306 |
| ENSMUSG00000031007 | 0.026013313  | 7.814595139  | 0.009752041 | 0.921334843 | 0.999071534 | Atp6ap2       | Atp6ap2       | ATP6AP2 | 204.0133575 | 198.5623587 | 226.7345021 | 277.1815157 | 246.4368521  | 188.4539983 | 277.7580396 | 229.215577  | 188.4076349 | 200.9134569 |
| ENSMUSG00000019359 | 0.048315549  | 5.518365622  | 0.009748518 | 0.92134901  | 0.999071534 | Gdpd2         | Gdpd2         | GDPD2   | 41.75711996 | 46.6019749  | 32.51566643 | 62.86018853 | 48.26709046  | 8.876983706 | 11.45460695 | 104.7289978 | 32.76312918 | 57.71196566 |
| ENSMUSG00000090100 | 0.029828613  | 3.869142394  | 0.009747085 | 0.92135477  | 0.999071534 | Ttbk2         | Ttbk2         | TTBK2   | 10.94808523 | 17.25340292 | 15.01240914 | 11.58681179 | 19.81697616  | 15.86215121 | 10.61330813 | 20.03391119 | 12.49241616 | 11.30710086 |
| ENSMUSG00000022403 | -0.025052241 | 8.610051426  | 0.009711287 | 0.921498854 | 0.999071534 | St13          | St13          | ST13    | 366.7608553 | 507.1077498 | 394.0925699 | 334.2136072 | 448.8577802  | 390.7328074 | 400.1993749 | 402.4052852 | 334.1524901 | 331.36995   |
| ENSMUSG00000039917 | 0.027912624  | 3.807832762  | 0.009686147 | 0.921600204 | 0.999071534 | Rhbdd2        | Rhbdd2        | RHBDD2  | 13.54474647 | 17.72772328 | 15.01240914 | 9.64411281  | 15.69661478  | 16.80805931 | 15.72581632 | 13.12566595 | 11.94243557 | 10.26135743 |
| ENSMUSG00000053768 | 0.020187427  | 6.056491602  | 0.009648007 | 0.921754213 | 0.999071534 | Chchd3        | Chchd3        | CHCHD3  | 72.63633472 | 68.77645151 | 69.07054607 | 57.79529476 | 75.01673815  | 75.67264798 | 82.70614507 | 59.61815642 | 47.21976171 | 60.52240113 |
| ENSMUSG00000007836 | -0.02807789  | 8.265964766  | 0.009599712 | 0.921949666 | 0.999071534 | Hnrnpa0       | Hnrnpa0       | HNRNPA0 | 259.7363041 | 217.653753  | 430.1088878 | 359.6074582 | 339.243087   | 407.6136288 | 201.9117157 | 307.8314079 | 261.5550528 | 302.2852108 |
| ENSMUSG00000062232 | 0.023602542  | 4.398621021  | 0.009578767 | 0.922034588 | 0.999071534 | Rapgef2       | Rapgef2       | RAPGEF2 | 20.00130956 | 21.58157616 | 23.42743668 | 19.84328247 | 23.08710424  | 27.21304841 | 14.81980221 | 21.6228076  | 18.85647722 | 19.86912521 |
| ENSMUSG00000052533 | -0.02349505  | 5.14293294   | 0.009578693 | 0.92203489  | 0.999071534 | Nup188        | Nup188        | NUP188  | 41.26585972 | 42.86670211 | 35.67971678 | 27.47531419 | 37.73727804  | 62.72098323 | 27.8275762  | 33.85040167 | 21.68494881 | 28.75794438 |
| ENSMUSG00000028140 | 0.026720565  | 5.17288374   | 0.009569638 | 0.922071632 | 0.999071534 | Mrp9          | Mrp9          | MRPL9   | 37.89721811 | 46.6019749  | 27.803251   | 39.27027231 | 33.09369617  | 45.62187527 | 57.20831944 | 30.39627905 | 25.29910694 | 19.21553556 |
| ENSMUSG00000006494 | -0.032990403 | 5.566335301  | 0.009566814 | 0.922083092 | 0.999071534 | Pdk1          | Pdk1          | PDK1    | 35.72163707 | 70.79231302 | 40.45945243 | 44.4739303  | 57.03103371  | 17.17187012 | 32.29293145 | 72.53657501 | 40.69856334 | 54.90153018 |
| ENSMUSG00000012017 | 0.022523701  | 4.972548757  | 0.00953653  | 0.922206122 | 0.999071534 | Scarf2        | Scarf2        | SCARF2  | 27.30003305 | 36.048347   | 37.83396383 | 35.45425645 | 23.74112986  | 44.16663204 | 28.86302089 | 25.9750021  | 23.57059653 | 32.09125157 |
| ENSMUSG00000031142 | 0.116020194  | -0.748539481 | 0.009514002 | 0.922297771 | 0.999071534 | Cacna1f       | Cacna1f       | CACNA1F | 1.052700503 | 0.118580089 | 0           | 0.555056852 | 0.588623054  | 0.727621615 | 1.164875283 | 0           | 0.471411931 | 0           |
| ENSMUSG00000040594 | -0.043729889 | 2.027531652  | 0.009509611 | 0.92231565  | 0.999071534 | Ranbp17       | Ranbp17       | RANBP17 | 5.263502516 | 2.134441599 | 3.90457278  | 4.093544286 | 5.428412612  | 4.875064822 | 5.436084652 | 1.934308667 | 2.357059653 | 4.509768551 |
| ENSMUSG00000055555 | 0.049666796  | 1.52549575   | 0.009508684 | 0.922319422 | 0.999071534 | 4930502E18Rik | 4930502E18Rik |         | 3.930081878 | 3.913142931 | 1.548365068 | 2.428373729 | 2.223687094  | 1.45524323  | 4.918362304 | 2.348803381 | 2.121353688 | 2.418281687 |
| ENSMUSG00000039787 | 0.058984727  | 0.956029177  | 0.009494859 | 0.922375738 | 0.999071534 | Cercam        | Cercam        | CERCAM  | 2.035220973 | 3.142372354 | 1.009803305 | 1.179495811 | 1.831271725  | 3.056010784 | 3.753487022 | 0.828989429 | 0.549980586 | 1.111102397 |

|                    |              |              |             |             |             |          |          |          |             |             |             |             |             |             |             |             |              |             |
|--------------------|--------------|--------------|-------------|-------------|-------------|----------|----------|----------|-------------|-------------|-------------|-------------|-------------|-------------|-------------|-------------|--------------|-------------|
| ENSMUSG00000032393 | -0.025518178 | 5.379730734  | 0.009480775 | 0.922433149 | 0.999071534 | Dpp8     | Dpp8     | DPP8     | 43.37126073 | 60.23868512 | 32.71762709 | 34.41352485 | 47.54766228 | 69.12405345 | 47.56574071 | 41.03497672 | 19.2493205   | 29.80368781 |
| ENSMUSG00000032411 | -0.033028395 | 3.377759826  | 0.009468472 | 0.922483333 | 0.999071534 | Tfdp2    | Tfdp2    | TFDP2    | 7.158363421 | 8.952796705 | 12.18495988 | 12.07248654 | 13.34212257 | 16.15319986 | 8.542418739 | 9.53337843  | 9.428238612  | 6.013024734 |
| ENSMUSG00000032519 | 0.032425049  | 3.505186616  | 0.009453402 | 0.922544852 | 0.999071534 | Slc25a38 | Slc25a38 | SLC25A38 | 17.96608859 | 12.1544591  | 10.83855548 | 7.215739081 | 9.810384239 | 16.58977283 | 14.04321869 | 7.391822406 | 8.956826681  | 8.823460208 |
| ENSMUSG00000028822 | 0.026014554  | 7.328990031  | 0.009452058 | 0.922550338 | 0.999071534 | Tmem50a  | Tmem50a  | TMEM50A  | 165.203799  | 149.470202  | 150.5953329 | 202.7345153 | 154.8732659 | 107.1059018 | 166.3183042 | 180.3052007 | 144.0949134  | 168.2993336 |
| ENSMUSG00000015092 | 0.028388657  | 7.57896346   | 0.00944719  | 0.922570223 | 0.999071534 | Edf1     | Edf1     | EDF1     | 171.7305421 | 121.1888508 | 261.0004943 | 216.194644  | 208.5033664 | 143.8507933 | 160.1703514 | 182.0322621 | 198.93358347 | 223.8544534 |
| ENSMUSG00000022842 | 0.030780313  | 4.246456024  | 0.009439144 | 0.922603099 | 0.999071534 | Ece2     | Ece2     | ECE2     | 23.08923104 | 20.1586151  | 16.83005509 | 18.52502245 | 18.31271725 | 27.64962138 | 33.45780673 | 11.12227484 | 8.956826681  | 14.05217737 |
| ENSMUSG00000027800 | 0.028637841  | 9.493176095  | 0.009422168 | 0.92267251  | 0.999071534 | Tm4sf1   | Tm4sf1   | TM4SF1   | 953.9571959 | 699.0296236 | 755.8041138 | 702.7019751 | 592.8088183 | 715.1065234 | 1219.49499  | 499.2588835 | 526.0957145  | 568.8190681 |
| ENSMUSG00000022220 | -0.037164975 | 2.280759114  | 0.009409696 | 0.922723547 | 0.999071534 | Adcy4    | Adcy4    | ADCY4    | 3.859901845 | 5.691844263 | 6.395420932 | 3.885397967 | 5.035997243 | 5.020589145 | 3.947632902 | 4.62852431  | 3.928432755  | 4.967281302 |
| ENSMUSG00000050967 | 0.069948524  | -0.127189534 | 0.009390935 | 0.922800381 | 0.999071534 | Creg2    | Creg2    | CREG2    | 1.19306057  | 0.948640711 | 0.201960661 | 0.485674746 | 1.177246109 | 0.873145938 | 0.517722348 | 0.621742072 | 1.021392516  | 0.784307574 |
| ENSMUSG00000026816 | 0.031374518  | 3.977781798  | 0.009382468 | 0.922835082 | 0.999071534 | Gtf3c5   | Gtf3c5   | GTF3C5   | 22.1768906  | 18.85423412 | 10.70391503 | 10.5460802  | 18.57432749 | 25.68504302 | 21.74433861 | 11.39860464 | 7.6997282    | 12.74499808 |
| ENSMUSG00000054383 | -0.07065992  | 0.223152647  | 0.009371044 | 0.922881928 | 0.999071534 | Pnma1    | Pnma1    | PNMA1    | 1.543960738 | 1.363671021 | 0.471241542 | 0.277528426 | 1.896674286 | 1.746291877 | 0.841298815 | 0.207247357 | 0.707117896  | 1.503256184 |
| ENSMUSG00000040820 | -0.052844405 | 1.393128049  | 0.009354826 | 0.922948478 | 0.999071534 | Hlcs     | Hlcs     | HLC5     | 3.228281543 | 2.668051998 | 2.288887492 | 2.01208109  | 3.008517833 | 5.166113468 | 3.17104938  | 2.003391119 | 0.31427462   | 1.960768935 |
| ENSMUSG00000047514 | -0.020923983 | 6.342154782  | 0.009325879 | 0.923067411 | 0.999071534 | Tspsy1l  | Tspsy1l  | TSPYL1   | 80.63685854 | 106.6627899 | 72.70583797 | 72.50430134 | 92.02140417 | 87.60564247 | 65.75073817 | 80.13564478 | 77.07585065  | 74.77065539 |
| ENSMUSG00000004610 | 0.022443064  | 6.214059062  | 0.009316191 | 0.923107261 | 0.999071534 | Etfb     | Etfb     | ETFB     | 92.14638404 | 56.2069621  | 88.99733129 | 79.37312989 | 64.29071805 | 78.80142093 | 94.74318965 | 54.29880758 | 59.47647191  | 74.05170678 |
| ENSMUSG00000028795 | 0.042134335  | 2.275203423  | 0.009295067 | 0.923194213 | 0.999071534 | Ccdc28b  | Ccdc28b  | CCDC28B  | 5.263502516 | 3.142372354 | 4.645095204 | 5.203657991 | 5.820827982 | 5.093351307 | 4.012348196 | 1.865226215 | 6.285492408  | 5.359435089 |
| ENSMUSG00000039934 | 0.024863934  | 4.443990847  | 0.009258754 | 0.923343926 | 0.999071534 | Gsap     | Gsap     | GSAP     | 29.19489395 | 25.79116932 | 19.59018412 | 16.9986161  | 20.20939153 | 17.9722539  | 21.29133155 | 26.32041436 | 16.89226085  | 21.89525311 |
| ENSMUSG00000032114 | 0.035998023  | 2.910900497  | 0.009244085 | 0.923404487 | 0.999071534 | Slc37a4  | Slc37a4  | SLC37A4  | 7.509263589 | 10.0200175  | 7.270583797 | 6.03624327  | 7.128879214 | 8.876983706 | 9.124856381 | 8.497141644 | 2.514196963  | 8.039152634 |
| ENSMUSG00000036634 | -0.095048023 | 0.101856086  | 0.00923949  | 0.923423466 | 0.999071534 | Mag      | Mag      | MAG      | 2.526481208 | 0.889350666 | 0.740522424 | 0           | 0.915635862 | 2.182864846 | 0.906014109 | 0.138164905 | 0            | 1.503256184 |
| ENSMUSG00000027951 | -0.025204593 | 4.911729914  | 0.009225354 | 0.923481888 | 0.999071534 | Adar     | Adar     | ADAR     | 36.00235721 | 35.81118682 | 27.87057122 | 25.18570468 | 32.63587824 | 54.35333466 | 15.8552469  | 26.66582662 | 22.47063536  | 28.62722645 |
| ENSMUSG00000021594 | -0.044861836 | 1.918176817  | 0.009212229 | 0.923536175 | 0.999071534 | Srd5a1   | Srd5a1   | SRD5A1   | 4.070441945 | 2.608761954 | 3.433331237 | 3.052812688 | 6.14784079  | 7.276216152 | 4.530070544 | 2.348803381 | 1.728510412  | 2.352922722 |
| ENSMUSG00000089662 | 0.052907707  | 0.991955359  | 0.009197395 | 0.923597572 | 0.999071534 | Gm14057  | Gm14057  |          | 1.052700503 | 2.253021687 | 1.817645949 | 2.636520049 | 1.63506404  | 1.018670261 | 1.747312924 | 1.381649048 | 2.592765618  | 2.0261279   |
| ENSMUSG00000030662 | -0.025471764 | 7.806756743  | 0.009197095 | 0.923598813 | 0.999071534 | Ipo5     | Ipo5     | IPO5     | 250.1216395 | 206.922255  | 261.8083369 | 210.9216039 | 243.3629317 | 354.7155374 | 213.7546144 | 132.0165665 | 196.0287945  | 194.9657911 |
| ENSMUSG00000049686 | 0.033804908  | 3.676297141  | 0.009195643 | 0.923604826 | 0.999071534 | Oral1    | Oral1    | ORAI1    | 17.75554849 | 15.11896132 | 13.26208341 | 6.799446442 | 12.49188926 | 23.93875114 | 17.21426807 | 7.944482025 | 7.69977282   | 7.712357812 |
| ENSMUSG00000026455 | 0.028728765  | 3.787131234  | 0.009157284 | 0.923763847 | 0.999071534 | Klhl12   | Klhl12   | KLHL12   | 15.36942735 | 14.17032061 | 16.08953266 | 13.87642131 | 10.66061754 | 20.08235658 | 16.43768454 | 10.84594503 | 12.02100423  | 8.169870563 |
| ENSMUSG00000029446 | 0.026834734  | 4.310671813  | 0.009156943 | 0.923765261 | 0.999071534 | Psph     | Psph     | PSPH     | 23.2295911  | 14.76322106 | 24.10063888 | 16.37417715 | 23.21790937 | 21.39207549 | 30.86919499 | 13.40199576 | 14.53520119  | 16.53581802 |
| ENSMUSG00000027304 | 0.031561519  | 6.596340733  | 0.009156709 | 0.923766231 | 0.999071534 | Rtf1     | Rtf1     | RTF1     | 62.24968975 | 64.44827827 | 139.8240976 | 123.5001497 | 102.6166191 | 83.60372359 | 40.96478077 | 104.1763382 | 114.4745305  | 114.7049827 |
| ENSMUSG00000033916 | -0.02363434  | 7.118863845  | 0.009146658 | 0.923807957 | 0.999071534 | Chmp2a   | Chmp2a   | CHMP2A   | 186.117449  | 139.5094745 | 130.3319466 | 143.3434321 | 127.6658002 | 110.5984855 | 158.2288926 | 132.7764735 | 123.9813377  | 129.4761087 |
| ENSMUSG00000020176 | -0.044255523 | 3.136345372  | 0.009144678 | 0.923816175 | 0.999071534 | Grb10    | Grb10    | GRB10    | 14.45708691 | 9.427117061 | 7.405224238 | 7.63203172  | 6.867268968 | 15.28005392 | 14.17264927 | 1.588896405 | 4.556981996  | 7.516280918 |
| ENSMUSG00000010110 | 0.02173957   | 5.963497484  | 0.009116756 | 0.923932219 | 0.999071534 | Stx5a    | Stx5a    | STX5     | 64.63581089 | 80.81233053 | 52.91369319 | 60.4318148  | 62.26323864 | 60.3198319  | 44.26526074 | 61.13797037 | 59.3193346   | 74.31314264 |
| ENSMUSG00000043252 | -0.028782737 | 3.771014068  | 0.009116067 | 0.923935087 | 0.999071534 | Tmem64   | Tmem64   | TMEM64   | 12.21132584 | 16.83837261 | 12.65620142 | 14.70900659 | 14.38856355 | 23.13836736 | 15.53167044 | 8.704389002 | 9.585375922  | 9.738485711 |
| ENSMUSG00000058050 | -0.083405159 | -0.203054619 | 0.009115087 | 0.923939165 | 0.999071534 | Gm9234   | Gm9234   |          | 0.070180034 | 1.007930755 | 1.683005509 | 0.693821065 | 0.457817931 | 0.727621615 | 1.29430587  | 0.207247357 | 1.021392516  | 0.130717929 |
| ENSMUSG00000030643 | 0.035438696  | 2.769590044  | 0.009113376 | 0.923946283 | 0.999071534 | Rab30    | Rab30    | RAB30    | 7.228543455 | 8.893506661 | 6.933982695 | 4.579219032 | 6.801866406 | 7.712789121 | 6.083237587 | 5.319348834 | 3.69272679   | 10.39207536 |
| ENSMUSG00000032261 | -0.031201747 | 4.009997791  | 0.009099942 | 0.924004361 | 0.999071534 | Sh3bgrl2 | Sh3bgrl2 | SH3BGR12 | 18.52752886 | 23.06382727 | 12.11763966 | 15.12529923 | 15.17339429 | 23.57494033 | 25.8214021  | 10.70778012 | 9.349669957  | 9.150255031 |
| ENSMUSG00000029469 | -0.026902776 | 4.154571907  | 0.009077948 | 0.924093803 | 0.999071534 | Ift81    | Ift81    | IFT81    | 16.98356812 | 18.08346354 | 20.73462787 | 16.65170557 | 20.27479409 | 17.31739444 | 21.42076214 | 17.75419027 | 7.385453579  | 22.02597104 |
| ENSMUSG00000041571 | -0.023720423 | 7.371565313  | 0.00906357  | 0.924153758 | 0.999071534 | Sepw1    | Sepw1    | SEPW1    | 160.0806565 | 190.1431724 | 162.7802928 | 176.438697  | 175.9328907 | 141.2313555 | 211.7484403 | 167.9394418 | 110.3889064  | 160.3255399 |
| ENSMUSG00000037787 | 0.029432872  | 3.944433826  | 0.009054377 | 0.924192116 | 0.999071534 | Apopt1   | Apopt1   | APOPT1   | 22.66815083 | 15.71186177 | 13.80064517 | 10.12978756 | 16.67765321 | 12.36956746 | 22.39149154 | 15.47446934 | 8.485414751  | 15.94758734 |
| ENSMUSG00000004317 | -0.022033176 | 4.436614421  | 0.009039875 | 0.924252667 | 0.999071534 | Cln5     | Cln5     | CLCN5    | 21.26455016 | 21.99660648 | 25.64900395 | 23.58991623 | 19.81697616 | 26.26714031 | 20.06174098 | 19.68849893 | 16.34228026  | 21.63381725 |
| ENSMUSG00000025150 | -0.05110945  | 4.194462806  | 0.009017873 | 0.924344628 | 0.999071534 | Cbr2     | Cbr2     |          | 14.59744698 | 8.656346483 | 13.80064517 | 42.73937763 | 14.1269533  | 37.69079967 | 37.34072434 | 4.90485412  | 4.32127603   | 8.496665386 |
| ENSMUSG00000047238 | 0.066286882  | 0.973748396  | 0.008986109 | 0.924477587 | 0.999071534 | Mageh1   | Mageh1   | MAGEH1   | 2.807201342 | 1.126510844 | 1.750325729 | 2.983430582 | 0.523220493 | 2.328389169 | 2.459181152 | 0.069082452 | 1.335667137  | 3.006512367 |

|                     |              |              |             |             |             |               |               |         |             |             |             |             |             |             |             |             |             |             |
|---------------------|--------------|--------------|-------------|-------------|-------------|---------------|---------------|---------|-------------|-------------|-------------|-------------|-------------|-------------|-------------|-------------|-------------|-------------|
| ENSMUSG00000052131  | -0.097876883 | -0.574440886 | 0.008986094 | 0.92447765  | 0.999071534 | Akr1b7        | Akr1b7        | AKR1B10 | 0.561440268 | 0.118580089 | 0           | 1.457024238 | 0.719428178 | 0.363810808 | 0.064715293 | 0.27632981  | 0.471411931 | 1.30717929  |
| ENSMUSG00000028433  | -0.02269958  | 5.771333288  | 0.008983692 | 0.924487714 | 0.999071534 | Ubap2         | Ubap2         | UBAP2   | 44.63450133 | 53.71678023 | 58.63591192 | 54.18742521 | 74.10110229 | 91.82584784 | 33.84609849 | 55.05871456 | 41.48424989 | 45.42448033 |
| ENSMUSG00000059208  | 0.027697379  | 7.992479602  | 0.008976248 | 0.924518912 | 0.999071534 | Hnrrnpm       | Hnrrnpm       | HNRNPM  | 279.1059934 | 236.8044374 | 285.0338129 | 251.7182826 | 255.854821  | 486.9243849 | 229.8687224 | 127.1117124 | 206.3998569 | 234.5733236 |
| ENSMUSG00000038607  | 0.029732641  | 6.963840142  | 0.008970308 | 0.924543815 | 0.999071534 | Gng10         | Gng10         | GNG10   | 159.2384961 | 98.65863389 | 126.9659356 | 178.1038675 | 72.53144081 | 113.7272585 | 199.5819651 | 73.98730651 | 113.7674126 | 102.5482153 |
| ENSMUSG00000073394  | -0.05920853  | 0.857044867  | 0.008958099 | 0.924595031 | 0.999071534 | Gm10497       | Runx2os1      |         | 1.473780704 | 0.652190488 | 1.750325729 | 3.052812688 | 1.896674286 | 1.309718907 | 1.29430587  | 2.694215643 | 1.964216377 | 0.457512752 |
| ENSMUSG00000002885  | -0.037488594 | 4.353273975  | 0.008948688 | 0.924634532 | 0.999071534 | Cd97          | Adgre5        | ADGRE5  | 41.68693992 | 23.65672772 | 15.28169002 | 10.12978756 | 17.2008737  | 31.72430242 | 35.98170317 | 13.40199576 | 6.756904338 | 13.46394669 |
| ENSMUSG00000054942  | 0.027711442  | 6.223133064  | 0.00893885  | 0.924675847 | 0.999071534 | Fam73a        | Fam73a        | FAM73A  | 42.80982046 | 45.11972379 | 105.6254257 | 98.31444498 | 88.75127609 | 77.56446418 | 49.70134539 | 72.74382237 | 68.35472994 | 92.48293477 |
| ENSMUSG00000066983  | -0.113794095 | -1.070695575 | 0.008907925 | 0.924805868 | 0.999071534 | Gm16519       | Gm16519       |         | 1.333420637 | 0.296450222 | 0.201960661 | 0           | 0.130805123 | 0.072762162 | 0.064715293 | 0.138164905 | 1.099961171 | 0.065358965 |
| ENSMUSG00000018167  | -0.024787331 | 4.975749902  | 0.008905731 | 0.924815104 | 0.999071534 | Stard3        | Stard3        | STARD3  | 47.93296291 | 37.05627775 | 20.66730764 | 22.41042042 | 37.27946011 | 42.56586449 | 38.82917609 | 27.63298096 | 18.14935933 | 26.40502166 |
| ENSMUSG00000022634  | -0.021957958 | 6.246540129  | 0.00890106  | 0.924834762 | 0.999071534 | Yaf2          | Yaf2          | YAF2    | 69.54841324 | 66.64200991 | 92.29602209 | 86.10319423 | 80.70676101 | 61.41126432 | 89.82482735 | 76.54335725 | 69.14041649 | 60.5877601  |
| ENSMUSG00000021024  | 0.029306388  | 7.92510527   | 0.008897627 | 0.924849218 | 0.999071534 | PsmA6         | PsmA6         | PSMA6   | 349.2158469 | 207.9894758 | 230.3024738 | 256.0893553 | 204.1867973 | 238.3688411 | 421.620137  | 138.648482  | 191.7860871 | 196.4690473 |
| ENSMUSG00000045031  | -0.03886324  | 3.271890195  | 0.008871585 | 0.924958952 | 0.999071534 | Cetn4         | Cetn4         |         | 6.035482885 | 5.573264174 | 11.915679   | 15.40282765 | 10.66061754 | 6.330308052 | 4.853647011 | 10.63869767 | 10.68533709 | 11.37245982 |
| ENSMUSG00000036223  | 0.035022257  | 3.964013519  | 0.008859743 | 0.9250089   | 0.999071534 | Ska1          | Ska1          | SKA1    | 19.65040939 | 5.988294485 | 15.68561134 | 22.2716562  | 15.23879685 | 18.04501606 | 21.48547744 | 7.599069763 | 16.73512354 | 11.30710086 |
| ENSMUSG00000000804  | 0.023114033  | 5.561773443  | 0.008859326 | 0.925010662 | 0.999071534 | Usp32         | Usp32         | USP32   | 34.45839647 | 50.75227801 | 63.68492844 | 47.24921456 | 45.84719568 | 43.58453475 | 32.29293145 | 60.58531075 | 42.11279913 | 47.7740305  |
| ENSMUSG00000059482  | 0.031944211  | 3.397403708  | 0.00885887  | 0.925012584 | 0.999071534 | 2610301820Rik | 2610301820Rik | C8orf37 | 11.57970553 | 12.21374915 | 9.626791509 | 9.019673851 | 11.11843547 | 10.76879991 | 16.63183042 | 11.53676955 | 4.949825271 | 7.646998847 |
| ENSMUSG00000026810  | 0.024432404  | 4.685688411  | 0.008816949 | 0.925189698 | 0.999071534 | Dpm2          | Dpm2          | DPM2    | 22.66815083 | 16.71979252 | 27.39932968 | 30.59750899 | 34.07473459 | 24.66637276 | 27.43928444 | 28.66921774 | 16.02800564 | 28.3657906  |
| ENSMUSG00000028161  | 0.037169365  | 8.927344905  | 0.008797646 | 0.925271395 | 0.999071534 | Ppp3ca        | Ppp3ca        | PPP3CA  | 278.8954533 | 377.796163  | 544.0147006 | 750.783775  | 516.4840289 | 251.6843167 | 201.3939933 | 616.0773104 | 605.8428995 | 593.1979618 |
| ENSMUSG00000021266  | -0.021778138 | 5.218764573  | 0.00879622  | 0.925277434 | 0.999071534 | Wars          | Wars          | WARS    | 38.59901845 | 31.7794638  | 44.29670498 | 34.06661432 | 45.65098799 | 58.64630219 | 30.15732676 | 25.56050739 | 32.52742321 | 34.11737947 |
| ENSMUSG00000047592  | 0.044696856  | 3.516531825  | 0.008783654 | 0.92533067  | 0.999071534 | Nxpe5         | Nxpe5         |         | 14.73780704 | 10.85007813 | 5.385617627 | 14.70900659 | 11.96866877 | 27.43133489 | 18.76743511 | 3.246875263 | 4.16413872  | 6.209101628 |
| ENSMUSG00000029048  | 0.02267282   | 6.903333817  | 0.008782124 | 0.925337154 | 0.999071534 | Rer1          | Rer1          | RER1    | 128.9207216 | 108.5600713 | 126.3600536 | 117.5332885 | 134.860082  | 113.8000206 | 179.3260782 | 101.6893699 | 80.21859685 | 109.3455476 |
| ENSMUSG00000011158  | 0.020873558  | 5.042464439  | 0.008763331 | 0.92541685  | 0.999071534 | Brf1          | Brf1          | BRF1    | 41.19567969 | 30.83082309 | 33.79475061 | 31.22194795 | 32.30886543 | 40.31023748 | 25.36839504 | 26.80399153 | 27.26332332 | 40.78399385 |
| ENSMUSG00000037544  | -0.026885836 | 4.503479043  | 0.00873756  | 0.925526276 | 0.999071534 | Dlgap5        | Dlgap5        | DLGAP5  | 31.23011493 | 18.61707394 | 25.71632417 | 15.19468133 | 28.18850405 | 36.01726995 | 29.44545853 | 14.507315   | 16.02800564 | 14.90184391 |
| ENSMUSG00000030704  | 0.021556776  | 6.678496358  | 0.008723837 | 0.925584612 | 0.999071534 | Rab6a         | Rab6a         | RAB6C   | 90.11116307 | 132.0389289 | 84.95811807 | 95.46977861 | 125.5729183 | 120.5669016 | 101.6030108 | 124.2793319 | 74.40451638 | 80.06473152 |
| ENSMUSG00000028646  | -0.022192048 | 6.397193743  | 0.008722071 | 0.925592124 | 0.999071534 | Rragc         | Rragc         | RRAGC   | 86.88288152 | 107.9078808 | 68.73394497 | 77.2916667  | 100.6545423 | 100.921118  | 103.0914625 | 95.88644392 | 42.11279913 | 69.34586134 |
| ENSMUSG00000082729  | -0.044072646 | 2.545571636  | 0.008714865 | 0.925622779 | 0.999071534 | Gm14845       | Gm14845       |         | 4.421342113 | 8.182026128 | 7.539864678 | 5.064893778 | 4.839789558 | 3.638108076 | 12.03704459 | 2.556050739 | 5.342668547 | 3.071871332 |
| ENSMUSG000000002804 | 0.036742803  | 2.831016928  | 0.008692946 | 0.925716098 | 0.999071534 | Nudt14        | Nudt14        | NUDT14  | 10.80772517 | 4.091013064 | 4.981696305 | 8.672763319 | 7.194281776 | 6.257545891 | 9.707294022 | 6.839162787 | 6.128355098 | 4.901922338 |
| ENSMUSG00000027316  | 0.024929674  | 4.095187479  | 0.008672858 | 0.925801728 | 0.999071534 | Gfra4         | Gfra4         | GFRA4   | 16.56248792 | 15.8897319  | 15.887572   | 19.91266458 | 18.83593774 | 20.8099782  | 13.07248928 | 16.92520084 | 10.60676844 | 22.35276586 |
| ENSMUSG00000009654  | 0.080641652  | -0.35471362  | 0.008668023 | 0.925822355 | 0.999071534 | Oit3          | Oit3          | OIT3    | 0.701800335 | 1.126510844 | 0.201960661 | 0.624438959 | 0.588623054 | 0.291048646 | 0.711868228 | 0.967154334 | 0           | 1.241820326 |
| ENSMUSG00000041632  | 0.034786223  | 4.188894202  | 0.00866541  | 0.925833305 | 0.999071534 | Mrps27        | Mrps27        | MRPS27  | 27.37021308 | 16.83837261 | 15.61829112 | 14.29271395 | 19.22835311 | 34.56202672 | 32.09878557 | 9.118883716 | 6.992610304 | 10.78422914 |
| ENSMUSG00000026526  | 0.024350047  | 5.980001483  | 0.0086604   | 0.925854884 | 0.999071534 | Fh1           | Fh1           | FH      | 83.65459998 | 54.66542094 | 61.79996227 | 50.78770199 | 74.82053047 | 76.4002696  | 105.4859284 | 48.01230441 | 39.52003351 | 42.61404486 |
| ENSMUSG00000018923  | -0.025878359 | 4.343481916  | 0.008639228 | 0.925945312 | 0.999071534 | Med11         | Med11         | MED11   | 29.75633422 | 16.89766266 | 17.57057751 | 22.2716562  | 19.16295055 | 24.52084843 | 29.38074324 | 13.47107822 | 12.96382809 | 17.77763835 |
| ENSMUSG00000025377  | -0.028647549 | 3.591986323  | 0.008634005 | 0.925967637 | 0.999071534 | Enthd2        | Enthd2        | TEPSIN  | 13.54474647 | 10.67220799 | 13.32940363 | 9.574730704 | 15.63121222 | 10.98708639 | 8.024696391 | 14.23098519 | 11.78529826 | 11.045665   |
| ENSMUSG00000020817  | -0.019459277 | 5.776798193  | 0.008626757 | 0.925998629 | 0.999071534 | Rabep1        | Rabep1        | RABEP1  | 58.24942784 | 76.42486724 | 48.47055865 | 42.46184921 | 61.54381046 | 70.724821   | 53.584263   | 50.84468496 | 40.0700141  | 50.4571206  |
| ENSMUSG000000001248 | 0.021933006  | 6.020776322  | 0.008608856 | 0.926075226 | 0.999071534 | Gramd1a       | Gramd1a       | GRAMD1A | 65.47797129 | 83.48038253 | 72.84047841 | 49.19191354 | 63.89830268 | 61.55678865 | 43.6828231  | 73.64189425 | 55.70517646 | 77.84252673 |
| ENSMUSG000000081350 | -0.074788841 | -0.051455157 | 0.008600308 | 0.926111831 | 0.999071534 | Gm5388        | Gm5388        |         | 0.98252047  | 2.01586151  | 0.403921322 | 0.346910533 | 0.654025616 | 1.964578361 | 0.970729402 | 0.828989429 | 0.078568655 | 0.326794823 |
| ENSMUSG00000015053  | -0.038320758 | 3.041694957  | 0.008549211 | 0.926331027 | 0.999071534 | Gata2         | Gata2         | GATA2   | 9.895384729 | 6.521904885 | 6.328100712 | 12.55816129 | 6.998074091 | 17.46291877 | 7.895265804 | 3.108710358 | 5.106962581 | 7.124127131 |
| ENSMUSG00000014245  | 0.042863235  | 2.010861184  | 0.008548759 | 0.926332968 | 0.999071534 | Pigl          | Pigl          | PIGL    | 5.052962415 | 6.106874574 | 3.366011017 | 2.01208109  | 3.531738326 | 6.621356699 | 4.659501131 | 1.934308667 | 3.771295445 | 2.483640651 |
| ENSMUSG00000031286  | -0.03559814  | 2.612509955  | 0.008540873 | 0.926366859 | 0.999071534 | GlT28d2       | GlT28d2       |         | 8.140883891 | 6.106874574 | 4.173853661 | 5.550568524 | 7.586697145 | 6.548594537 | 8.801279913 | 5.250266382 | 4.478413341 | 3.594743048 |
| ENSMUSG000000062980 | -0.051509915 | 1.256448719  | 0.008536255 | 0.92638671  | 0.999071534 | Cped1         | Cped1         | CPED1   | 1.614140771 | 2.312311732 | 2.760129034 | 3.399723221 | 1.700466601 | 3.638108076 | 4.27120937  | 1.312566595 | 0.707117896 | 1.241820326 |

|                     |              |              |             |             |             |               |               |          |             |             |             |             |             |             |             |             |             |             |
|---------------------|--------------|--------------|-------------|-------------|-------------|---------------|---------------|----------|-------------|-------------|-------------|-------------|-------------|-------------|-------------|-------------|-------------|-------------|
| ENSMUSG00000041203  | -0.027916016 | 7.44556796   | 0.008529473 | 0.926415877 | 0.999071534 | 2310036O22Rik | 2310036O22Rik | C19orf43 | 173.5552229 | 88.28287612 | 251.7103039 | 209.7421081 | 185.5470672 | 165.6794418 | 127.5538434 | 143.4151712 | 164.6799011 | 222.0244024 |
| ENSMUSG00000003949  | -0.03785195  | 5.697606325  | 0.008518468 | 0.926463226 | 0.999071534 | Hlf           | Hlf           | HLF      | 29.05453389 | 59.34933445 | 35.54507634 | 50.51017357 | 98.75786801 | 22.19245926 | 18.8968657  | 89.87627056 | 39.12719024 | 69.34586134 |
| ENSMUSG00000089774  | 0.022100907  | 5.834324484  | 0.008508718 | 0.926505205 | 0.999071534 | Slc5a3        | Slc5a3        | SLCSA3   | 39.93243909 | 55.31761143 | 48.47055865 | 71.87986238 | 76.58639963 | 68.03262102 | 63.4857029  | 43.59102746 | 55.62660781 | 45.62055722 |
| ENSMUSG00000034855  | 0.027296987  | 4.591677931  | 0.00848485  | 0.926608064 | 0.999071534 | Cxcl10        | Cxcl10        | CXCL10   | 29.61597415 | 15.59328168 | 31.775144   | 27.05902155 | 18.83593774 | 31.94258891 | 11.97232929 | 25.21509512 | 21.92065477 | 26.20894477 |
| ENSMUSG00000026311  | 0.028991347  | 3.279882984  | 0.008460858 | 0.926711608 | 0.999071534 | Asb1          | Asb1          | ASB1     | 9.404124495 | 13.69600026 | 9.89607239  | 7.285121188 | 9.090956062 | 11.42365936 | 10.9368846  | 8.773471454 | 6.992610304 | 9.019537102 |
| ENSMUSG00000020869  | 0.02778343   | 8.072160255  | 0.008448869 | 0.926763406 | 0.999071534 | Lrrc59        | Lrrc59        | LRRCS9   | 349.6369271 | 290.6397977 | 239.525344  | 182.0586476 | 331.0023642 | 459.056477  | 371.0774928 | 194.0526088 | 138.045127  | 204.6389179 |
| ENSMUSG00000031453  | -0.020663185 | 6.628558025  | 0.008436906 | 0.926815127 | 0.999071534 | Rasa3         | Rasa3         | RASA3    | 86.18108119 | 127.1771453 | 98.01824082 | 113.2315979 | 90.51714525 | 114.8186909 | 77.78778276 | 108.3212854 | 83.91132364 | 88.88819173 |
| ENSMUSG00000021028  | -0.026123415 | 4.037064065  | 0.0084329   | 0.926832454 | 0.999071534 | Mbip          | Mbip          | MBIP     | 14.94834714 | 13.04380977 | 18.04181905 | 21.78598146 | 17.00466601 | 13.53376204 | 19.15572687 | 18.92859196 | 11.5495923  | 14.31361323 |
| ENSMUSG00000028223  | 0.024619875  | 5.120951953  | 0.008416717 | 0.926902498 | 0.999071534 | Decr1         | Decr1         | DECR1    | 46.4591822  | 39.2500094  | 30.49605981 | 29.6261595  | 33.22450129 | 43.00243746 | 58.24376413 | 23.48803381 | 18.77790857 | 29.21545713 |
| ENSMUSG00000021690  | 0.027202446  | 4.756509723  | 0.008408506 | 0.926938062 | 0.999071534 | Jmy           | Jmy           | JMY      | 22.03653053 | 33.73603527 | 29.95749805 | 23.38176991 | 29.36575016 | 28.08619435 | 13.00777399 | 43.59102746 | 23.0991846  | 22.15668897 |
| ENSMUSG00000031478  | -0.043672365 | 2.266031304  | 0.008367949 | 0.927113984 | 0.999071534 | Nek3          | Nek3          | NEK3     | 3.579181711 | 3.023792265 | 5.587578288 | 8.117706466 | 4.054958819 | 3.128772945 | 2.459181152 | 6.148338263 | 6.285492408 | 3.267948225 |
| ENSMUSG00000042709  | -0.024453724 | 4.279599859  | 0.008357476 | 0.92715948  | 0.999071534 | Atpaf2        | Atpaf2        | ATPAF2   | 24.84373187 | 20.63293545 | 18.78234148 | 17.27614453 | 19.68617104 | 25.53951869 | 22.52092213 | 11.19135729 | 18.5422026  | 15.03256184 |
| ENSMUSG00000038658  | 0.02555518   | 4.232034394  | 0.008351551 | 0.927185233 | 0.999071534 | C030046E11Rik | Ric1          | RIC1     | 21.19437013 | 27.98490096 | 16.42613376 | 11.51742969 | 19.48996336 | 24.88465924 | 16.50239984 | 17.13244819 | 18.30649664 | 14.24825426 |
| ENSMUSG00000001157  | 0.020984942  | 5.363297066  | 0.008335864 | 0.92725346  | 0.999071534 | Gmcl1         | Gmcl1         | GMCL1    | 41.89748002 | 33.26171491 | 47.79735644 | 49.8163525  | 37.73727804 | 48.16855093 | 48.21289364 | 29.84361943 | 38.97005293 | 34.11737947 |
| ENSMUSG00000030245  | 0.024796778  | 6.17343121   | 0.008329277 | 0.927282128 | 0.999071534 | Golt1b        | Golt1b        | GOLT1B   | 87.09342163 | 85.97056439 | 56.68362553 | 68.06384652 | 73.77408948 | 94.51804782 | 123.9945023 | 46.42340801 | 42.89848568 | 51.3721461  |
| ENSMUSG00000008435  | 0.026332619  | 3.697689996  | 0.008322804 | 0.927310313 | 0.999071534 | Rdh13         | Rdh13         | RDH13    | 16.07122768 | 12.6880695  | 13.19476319 | 11.86434022 | 12.36108414 | 15.93491337 | 17.861421   | 11.74401691 | 7.621159544 | 10.52279329 |
| ENSMUSG00000030263  | 0.035585193  | 3.19404431   | 0.008314017 | 0.927348586 | 0.999071534 | Lrmp          | Lrmp          | LRMP     | 16.42212785 | 6.818355107 | 9.694111729 | 5.134275885 | 8.567735569 | 17.60844309 | 10.22501637 | 6.493750525 | 4.556981996 | 7.385562989 |
| ENSMUSG00000019849  | -0.022882746 | 6.099952897  | 0.008308589 | 0.927372243 | 0.999071534 | Prep          | Prep          | PREP     | 74.81191576 | 79.92297986 | 67.522181   | 44.89022294 | 93.65646821 | 122.53148   | 70.28080872 | 56.57852851 | 40.0700141  | 51.82965885 |
| ENSMUSG00000021124  | -0.024448406 | 6.600940428  | 0.008308318 | 0.927373424 | 0.999071534 | Vt1b          | Vt1b          | VT1B     | 135.8685449 | 105.2398288 | 84.82347763 | 89.98859219 | 92.87163747 | 105.5778964 | 164.3121301 | 63.00319658 | 57.90509881 | 80.39152634 |
| ENSMUSG00000007613  | -0.021495442 | 6.141577691  | 0.0082556   | 0.927603571 | 0.999071534 | Tgfbr1        | Tgfbr1        | TGFBR1   | 63.23221022 | 101.3266859 | 68.93590563 | 62.79080643 | 72.85845362 | 75.4543615  | 67.62748169 | 90.49801264 | 56.72656898 | 46.66630066 |
| ENSMUSG00000001524  | -0.024722102 | 3.983213972  | 0.008253014 | 0.927614879 | 0.999071534 | Gtf2h4        | Gtf2h4        | GTF2H4   | 19.22932919 | 14.58535092 | 18.44574037 | 14.70900659 | 15.23879685 | 21.24655116 | 18.57328923 | 10.56961522 | 10.76390575 | 15.35935666 |
| ENSMUSG00000037286  | -0.018613103 | 5.624843131  | 0.008230969 | 0.927711353 | 0.999071534 | Stag1         | Stag1         | STAG1    | 47.02062247 | 57.45205303 | 55.40454134 | 46.00033664 | 51.47181598 | 74.72673988 | 46.59501131 | 42.62387313 | 32.92026649 | 45.16304447 |
| ENSMUSG000000047888 | -0.033526366 | 5.729646336  | 0.008220515 | 0.927757147 | 0.999071534 | Tnrc6b        | Tnrc6b        | TNRC6B   | 33.0547958  | 44.70469348 | 69.13786629 | 70.14530972 | 59.05851312 | 40.38299964 | 13.59021163 | 66.04282449 | 70.161809   | 51.63358196 |
| ENSMUSG00000000690  | 0.058403076  | 0.53221172   | 0.008216505 | 0.927774722 | 0.999071534 | Hoxb6         | Hoxb6         | HOXB6    | 0.98252047  | 1.007930755 | 2.086926831 | 0.693821065 | 1.962076848 | 0.873145938 | 1.68259763  | 0.414494714 | 1.964216377 | 1.30717929  |
| ENSMUSG000000082157 | -0.075499142 | 0.287441126  | 0.008177312 | 0.927946717 | 0.999071534 | Gm12038       | Gm12038       |          | 1.754500839 | 0.237160178 | 1.009803305 | 0.416292639 | 2.419894779 | 1.018670261 | 0.711868228 | 0.414494714 | 0.078568655 | 3.006512367 |
| ENSMUSG000000026259 | -0.079362704 | -0.312756161 | 0.008173806 | 0.927962124 | 0.999071534 | Ngef          | Ngef          | NGEF     | 0.350900168 | 1.126510844 | 0           | 0.971349492 | 1.111843547 | 0.582097292 | 0.841298815 | 1.036236786 | 0.471411931 | 0.196076894 |
| ENSMUSG000000001143 | -0.021131135 | 4.561731061  | 0.008144296 | 0.928091929 | 0.999071534 | Lman2l        | Lman2l        | LMAN2L   | 24.70337181 | 20.75151554 | 23.62939734 | 27.68346051 | 25.76860927 | 28.45000516 | 20.77360921 | 20.79381817 | 17.20653547 | 26.40502166 |
| ENSMUSG000000025481 | 0.061217943  | 0.303226665  | 0.008141502 | 0.92810423  | 0.999071534 | Urah          | Urah          |          | 0.561440268 | 2.01586151  | 1.413724627 | 0.901967385 | 0.654025616 | 1.528005392 | 1.941458804 | 1.243484143 | 0.392843275 | 0.457512752 |
| ENSMUSG00000038346  | 0.022343919  | 5.0418955    | 0.008137995 | 0.928119675 | 0.999071534 | Zfp384        | Zfp384        | ZNF384   | 33.8969562  | 37.70846824 | 32.24638554 | 32.26267955 | 32.96289104 | 42.78415098 | 21.67962332 | 46.1470782  | 18.14935933 | 33.79058465 |
| ENSMUSG00000025155  | -0.023960918 | 4.720330964  | 0.008130745 | 0.928151614 | 0.999071534 | Dus1l         | Dus1l         | DUS1L    | 39.09027868 | 20.09932505 | 25.04312197 | 26.71211102 | 26.55344001 | 35.43517266 | 34.04024437 | 15.88896405 | 16.49941757 | 26.60109855 |
| ENSMUSG000000042613 | 0.026665132  | 5.684011976  | 0.008104304 | 0.928268217 | 0.999071534 | Pbx1p1        | Pbx1p1        | PBX1P1   | 41.05531962 | 39.42787953 | 73.78296149 | 60.3624327  | 47.6784674  | 41.32890774 | 24.46238094 | 59.0654968  | 57.11941226 | 60.91455492 |
| ENSMUSG000000031554 | -0.05759832  | 0.274723639  | 0.008101919 | 0.928278744 | 0.999071534 | Adam5         | Adam5         |          | 0.631620302 | 1.48225111  | 1.279084186 | 1.457024238 | 0.784830739 | 1.164194584 | 1.29430587  | 1.036236786 | 0.31427462  | 1.372538255 |
| ENSMUSG000000056938 | -0.024016655 | 4.363431963  | 0.008090874 | 0.928327514 | 0.999071534 | Acbd4         | Acbd4         | ACBD4    | 25.19463204 | 16.60121243 | 19.79214478 | 21.02277828 | 24.5259606  | 14.47967014 | 17.92613629 | 23.90252853 | 16.9708295  | 23.00635551 |
| ENSMUSG000000031290 | 0.020129347  | 6.170496964  | 0.008085102 | 0.928353019 | 0.999071534 | Lrch2         | Lrch2         | LRCH2    | 55.2316864  | 72.39314422 | 91.08425812 | 72.43491924 | 78.94089185 | 69.34233993 | 70.99267695 | 85.86948833 | 57.11941226 | 64.50929797 |
| ENSMUSG00000038618  | 0.041082745  | 2.20692491   | 0.008081372 | 0.928369499 | 0.999071534 | Rassf7        | Rassf7        | RASSF7   | 7.649623656 | 3.972432975 | 3.433331237 | 2.914048475 | 5.166802366 | 3.34705943  | 7.765835218 | 4.697606763 | 3.614158135 | 2.287563758 |
| ENSMUSG00000030079  | 0.024287283  | 5.747189937  | 0.008062616 | 0.928452449 | 0.999071534 | Ruvbl1        | Ruvbl1        | RUVBL1   | 66.81139193 | 52.4716893  | 59.71303544 | 39.61718284 | 58.53529263 | 92.69899378 | 78.69379687 | 35.57746298 | 25.3776756  | 40.39184006 |
| ENSMUSG00000032489  | -0.076617263 | 0.661663075  | 0.008050757 | 0.928504946 | 0.999071534 | Kif9          | Kif9          | KIF9     | 1.543960738 | 2.786632087 | 2.356207712 | 0           | 1.177246109 | 0.727621615 | 0.906014109 | 1.72706131  | 2.828471584 | 0.130717929 |
| ENSMUSG00000022401  | -0.042839165 | 3.032251471  | 0.008049981 | 0.928508383 | 0.999071534 | Xpnpep3       | Xpnpep3       | XPNPEP3  | 12.98330621 | 16.66050248 | 3.096730136 | 3.746633754 | 6.344048475 | 12.58785394 | 12.61948223 | 4.62852431  | 4.00700141  | 5.882306805 |
| ENSMUSG00000027708  | 0.018174808  | 5.434401187  | 0.008041175 | 0.928547389 | 0.999071534 | Dcun1d1       | Dcun1d1       | DCUN1D1  | 42.03784009 | 42.86670211 | 45.03722741 | 44.12701977 | 48.26709046 | 50.64246442 | 49.96020657 | 39.86057503 | 31.82030531 | 38.88858388 |

|                    |              |              |             |             |             |               |               |          |             |             |             |             |             |             |             |             |             |             |
|--------------------|--------------|--------------|-------------|-------------|-------------|---------------|---------------|----------|-------------|-------------|-------------|-------------|-------------|-------------|-------------|-------------|-------------|-------------|
| ENSMUSG00000029538 | -0.019364523 | 6.325199296  | 0.008039832 | 0.928553341 | 0.999071534 | Srsf9         | Srsf9         | SRSF9    | 77.54893706 | 73.28249489 | 96.53719597 | 74.93267507 | 96.53418092 | 112.4903017 | 84.71231916 | 69.77327692 | 47.29833037 | 79.28042394 |
| ENSMUSG00000060487 | 0.058629545  | 1.714836105  | 0.008028547 | 0.928603367 | 0.999071534 | Samd5         | Samd5         | SAMD5    | 6.175842952 | 3.083082309 | 3.702612119 | 0.901967385 | 2.289089656 | 7.567264798 | 4.27120937  | 0.414494714 | 0.549980586 | 3.986896835 |
| ENSMUSG00000045414 | -0.023413442 | 4.746418469  | 0.008026487 | 0.928612505 | 0.999071534 | 1190002N15Rik | 1190002N15Rik | C3orf58  | 20.84346996 | 36.16692709 | 26.7934477  | 24.56126572 | 31.58943725 | 30.70563216 | 18.70271982 | 37.85718391 | 17.6779744  | 23.85602204 |
| ENSMUSG00000074165 | -0.029453287 | 3.487311734  | 0.008019783 | 0.928642245 | 0.999071534 | Zfp788        | Zfp788        |          | 10.10592483 | 9.486407105 | 13.19476319 | 12.00310443 | 13.21131744 | 8.804221544 | 8.542418739 | 11.26043974 | 13.43524002 | 9.28097296  |
| ENSMUSG00000086919 | -0.078364659 | -0.062516511 | 0.008018487 | 0.928647995 | 0.999071534 | Gm11497       | Gm11497       |          | 0.350900168 | 0.237160178 | 0.875162864 | 2.705902155 | 0.130805123 | 0.291048646 | 0.517722348 | 0.898071881 | 1.099961171 | 0.915025503 |
| ENSMUSG00000029592 | -0.025910562 | 4.177876119  | 0.008006999 | 0.928698987 | 0.999071534 | Usp30         | Usp30         | USP30    | 16.91338808 | 26.20619963 | 19.32090324 | 9.782877023 | 22.56388375 | 17.9722539  | 14.36679515 | 22.31363212 | 14.45663254 | 16.47045906 |
| ENSMUSG00000032845 | 0.052059191  | 1.650800947  | 0.007994803 | 0.928753164 | 0.999071534 | Alpk2         | Alpk2         | ALPK2    | 3.298461576 | 2.01586151  | 3.366011017 | 5.411804311 | 1.046440986 | 1.382481069 | 1.100159989 | 3.315957715 | 3.457020824 | 4.967281302 |
| ENSMUSG00000090236 | -0.056107582 | 0.729178498  | 0.007987752 | 0.928784506 | 0.999071534 | Car15         | Car15         |          | 1.263240604 | 1.304380977 | 1.413724627 | 2.081463196 | 1.962076848 | 0.436572969 | 1.100159989 | 1.865226215 | 0.628549241 | 3.071871332 |
| ENSMUSG00000029930 | -0.058897229 | 0.658505909  | 0.007980142 | 0.928818351 | 0.999071534 | Cds1          | Cds1          | CDS1     | 2.17558104  | 1.660121243 | 2.154247051 | 0.277528426 | 1.438856355 | 3.783632399 | 1.29430587  | 0.621742072 | 0.707117896 | 0.915025503 |
| ENSMUSG00000030393 | 0.039184058  | 2.441934467  | 0.007975911 | 0.92883717  | 0.999071534 | Zlk1          | Zlk1          | ZIK1     | 6.035482885 | 5.336103997 | 3.702612119 | 7.285121188 | 4.643581873 | 8.731459383 | 5.241938772 | 1.657978857 | 3.771295445 | 7.320204025 |
| ENSMUSG00000007833 | -0.019236284 | 5.034083285  | 0.007973069 | 0.928849815 | 0.999071534 | Aldh16a1      | Aldh16a1      | ALDH16A1 | 43.3010807  | 30.59366291 | 29.41893629 | 30.38936267 | 37.27946011 | 39.87366451 | 27.95700678 | 30.05086679 | 27.89187256 | 31.306944   |
| ENSMUSG00000025474 | 0.01918398   | 5.050844069  | 0.007962852 | 0.928895296 | 0.999071534 | Tubgcp2       | Tubgcp2       | TUBGCP2  | 39.37099882 | 34.80325607 | 34.53527304 | 31.43009427 | 30.28138602 | 46.85883202 | 35.722842   | 30.60352641 | 20.89926226 | 29.99976471 |
| ENSMUSG00000023791 | 0.022040253  | 5.416344934  | 0.007962458 | 0.928897053 | 0.999071534 | Pigx          | Pigx          | PIGX     | 49.40674361 | 39.36858949 | 40.52677265 | 51.68966938 | 37.54107036 | 29.39591325 | 54.5549924  | 37.5808541  | 39.20575889 | 42.41796796 |
| ENSMUSG00000054099 | 0.022807137  | 4.242959018  | 0.007949878 | 0.928953094 | 0.999071534 | Slc25a40      | Slc25a40      | SLC25A40 | 19.65040939 | 21.58157616 | 18.17645949 | 15.95788451 | 21.71365045 | 17.31739444 | 22.58563742 | 15.47446934 | 18.07079067 | 16.99333077 |
| ENSMUSG00000010607 | -0.02805951  | 3.600463902  | 0.007949163 | 0.928956281 | 0.999071534 | Pigyl         | Pigyl         | PIGY     | 17.05374815 | 10.49433786 | 12.85816209 | 13.59889288 | 8.763943254 | 14.11585934 | 16.50239984 | 10.22420295 | 8.642552061 | 8.431306421 |
| ENSMUSG00000040945 | -0.023541384 | 7.284195195  | 0.007893776 | 0.929203564 | 0.999071534 | Rcc2          | Rcc2          | RCC2     | 189.7668107 | 156.4071371 | 172.4070843 | 134.4625225 | 164.2258322 | 293.8863704 | 142.6972221 | 100.6531331 | 102.8463695 | 136.9923896 |
| ENSMUSG00000022237 | -0.034099474 | 4.525196628  | 0.007874488 | 0.929289885 | 0.999071534 | Ankrd33b      | Ankrd33b      | ANKRD33B | 14.59744698 | 46.54268486 | 19.99410544 | 18.80255087 | 20.53640434 | 20.00959442 | 11.26046107 | 45.31808877 | 14.61376985 | 17.25476663 |
| ENSMUSG00000038037 | -0.026670596 | 3.994840811  | 0.007867367 | 0.929321779 | 0.999071534 | Socs1         | Socs1         | SOCS1    | 21.5452703  | 14.88180115 | 15.2143698  | 13.32136446 | 18.24731469 | 29.10486461 | 14.49622574 | 13.60924312 | 6.992610304 | 15.0979208  |
| ENSMUSG00000040272 | -0.029391888 | 3.19304412   | 0.007861159 | 0.929349596 | 0.999071534 | Accs          | Accs          | ACCS     | 10.6673651  | 7.648415729 | 8.011106221 | 10.5460802  | 10.33360473 | 7.64002696  | 7.765835218 | 9.257048621 | 6.599767028 | 11.56853672 |
| ENSMUSG00000038417 | -0.025853941 | 4.381116575  | 0.007848552 | 0.929406124 | 0.999071534 | Fig4          | Fig4          | FIG4     | 24.35247164 | 29.28928194 | 16.89737531 | 9.713494917 | 29.36575016 | 26.33990247 | 24.33295035 | 17.89235517 | 13.1209654  | 19.1501766  |
| ENSMUSG00000071073 | -0.045466702 | 1.455746574  | 0.007827366 | 0.929501219 | 0.999071534 | Lrrc73        | Lrrc73        | LRRC73   | 3.298461576 | 1.422961066 | 3.029409915 | 4.440454819 | 1.438856355 | 2.473913492 | 1.68259763  | 2.141556024 | 2.514196963 | 3.464025119 |
| ENSMUSG00000024885 | -0.019487192 | 4.684269762  | 0.007819822 | 0.929535113 | 0.999071534 | Aldh3b1       | Aldh3b1       | ALDH3B1  | 27.08949295 | 24.66465847 | 27.19736902 | 24.00620887 | 30.93541163 | 28.01343219 | 23.87994329 | 23.48803381 | 19.64216377 | 28.03899577 |
| ENSMUSG00000070953 | 0.022883997  | 4.478206129  | 0.007818902 | 0.929539245 | 0.999071534 | Rabepk        | Rabepk        | RABEPK   | 29.68615419 | 25.02039874 | 22.28299293 | 18.59440456 | 18.83593774 | 26.77647544 | 29.83375029 | 14.3691501  | 17.59937874 | 20.19592003 |
| ENSMUSG00000068262 | -0.063222068 | 0.422601823  | 0.007812985 | 0.929565844 | 0.999071534 | Gm5879        | Gm5879        |          | 0.631620302 | 0.711480533 | 0.942483085 | 3.122194795 | 0.850233301 | 0.436572969 | 1.941458804 | 0.759906976 | 0.549980586 | 1.960768935 |
| ENSMUSG00000048988 | 0.080763892  | 0.061078107  | 0.007811614 | 0.929572007 | 0.999071534 | Elfn1         | Elfn1         | ELFN1    | 0.421080201 | 0.5336104   | 0.942483085 | 2.22022741  | 0.39241537  | 0.363810808 | 0.323576467 | 3.108710358 | 0.549980586 | 0.065358965 |
| ENSMUSG00000020572 | -0.023882828 | 7.092514194  | 0.007810443 | 0.929577269 | 0.999071534 | Nampt         | Nampt         | NAMPT    | 137.6230458 | 212.1990689 | 105.2888246 | 119.822898  | 140.8117151 | 102.2308369 | 131.6956222 | 167.0413699 | 120.3671796 | 119.4761871 |
| ENSMUSG00000038023 | 0.019361636  | 5.611964553  | 0.007805655 | 0.929598805 | 0.999071534 | Atp6v0a2      | Atp6v0a2      | ATP6VOA2 | 53.54736559 | 54.84329108 | 51.56728878 | 44.5433124  | 47.3514546  | 72.90768585 | 52.54881831 | 30.1890317  | 33.941659   | 53.33291504 |
| ENSMUSG00000083844 | 0.025538262  | 3.675494192  | 0.007803142 | 0.929610106 | 0.999071534 | 2210015D19Rik | Ube2d-ps      |          | 16.42212785 | 12.56948941 | 12.5888812  | 9.366584384 | 14.45396611 | 13.53376204 | 15.46695514 | 9.602460883 | 9.113963991 | 14.24825426 |
| ENSMUSG00000057886 | -0.142492721 | 3.596627964  | 0.007801002 | 0.929619734 | 0.999071534 | Gm6984        | Cbx3-ps6      |          | 39.93243909 | 23.53814763 | 0           | 0           | 3.008517833 | 37.90908615 | 24.52709623 | 0           | 0           | 0           |
| ENSMUSG00000010054 | 0.025980294  | 3.855425201  | 0.0077967   | 0.929639093 | 0.999071534 | Tusc2         | Tusc2         | TUSC2    | 17.82572852 | 9.486407105 | 14.27188671 | 16.51294136 | 15.56580966 | 15.86215121 | 17.53784453 | 13.19474841 | 12.96382809 | 10.1306395  |
| ENSMUSG00000026201 | 0.027513154  | 5.206785668  | 0.007786875 | 0.929683324 | 0.999071534 | Stk16         | Stk16         | STK16    | 62.74094999 | 37.82704833 | 24.1679591  | 31.7770048  | 33.61691666 | 47.6592158  | 65.491877   | 23.41895136 | 17.99222202 | 29.93440574 |
| ENSMUSG00000022095 | -0.024650024 | 4.241554455  | 0.007766354 | 0.9297758   | 0.999071534 | Fam160b2      | Fam160b2      | FAM160B2 | 23.58049127 | 20.04003501 | 22.88887492 | 14.50086027 | 17.65869163 | 20.00959442 | 11.06631518 | 20.79381817 | 13.51380868 | 24.77104755 |
| ENSMUSG00000031974 | 0.022922279  | 4.651739544  | 0.00773571  | 0.929914124 | 0.999071534 | Abcb10        | Abcb10        | ABCB10   | 24.98409194 | 30.77153305 | 26.25488593 | 21.99412778 | 24.98377853 | 32.96125917 | 38.05259257 | 18.03052007 | 17.6779744  | 17.05868974 |
| ENSMUSG00000029993 | -0.021630254 | 4.862411937  | 0.007695313 | 0.930096892 | 0.999071534 | Nfu1          | Nfu1          | NFU1     | 34.66893657 | 27.03626025 | 33.12154841 | 30.87503741 | 25.57240158 | 31.21496729 | 38.6997455  | 18.23776743 | 19.56359512 | 32.41804639 |
| ENSMUSG00000045503 | 0.025752286  | 4.748100675  | 0.007678147 | 0.930174701 | 0.999071534 | Sys1          | Sys1          | EIF3A    | 39.72189898 | 33.14313482 | 19.72482456 | 22.54918463 | 23.02170168 | 39.65537803 | 41.35307253 | 18.58317969 | 13.04239675 | 22.15668897 |
| ENSMUSG00000024991 | -0.024040321 | 8.147747532  | 0.007675218 | 0.930187988 | 0.999071534 | Elf3a         | Elf3a         | EIF3A    | 233.6995117 | 304.454378  | 336.6011017 | 279.6098894 | 329.1710925 | 353.187532  | 165.606436  | 280.1293445 | 267.1334273 | 289.6055717 |
| ENSMUSG00000092171 | -0.120139056 | -0.946136254 | 0.007667746 | 0.930221891 | 0.999071534 | 4833427F10Rik | 4833427F10Rik |          | 0.280720134 | 0.711480533 | 1.009803305 | 0           | 0.065402562 | 0.582097292 | 0           | 1.243484143 | 0           | 0           |
| ENSMUSG00000059423 | 0.029578454  | 3.286133439  | 0.007654112 | 0.930283796 | 0.999071534 | Zfp933        | Zfp933        | ZNF788   | 11.57970553 | 11.97658897 | 8.415027543 | 9.366584384 | 8.109917638 | 9.822891806 | 9.901439902 | 5.250266382 | 10.37106247 | 11.045665   |
| ENSMUSG00000002413 | -0.025860565 | 4.499573149  | 0.007629594 | 0.930395263 | 0.999071534 | Braf          | Braf          | BRAF     | 15.57996745 | 26.68051998 | 24.84116131 | 23.38176991 | 27.14206306 | 23.79322682 | 15.66110102 | 31.84701055 | 22.31349805 | 12.54892118 |

|                     |              |              |             |             |             |               |               |             |             |             |             |             |             |             |             |             |             |             |
|---------------------|--------------|--------------|-------------|-------------|-------------|---------------|---------------|-------------|-------------|-------------|-------------|-------------|-------------|-------------|-------------|-------------|-------------|-------------|
| ENSMUSG00000030677  | -0.028447307 | 5.153246462  | 0.007629549 | 0.930395465 | 0.999071534 | Klf22         | Klf22         | KIF22       | 46.59954227 | 18.0241735  | 48.13395754 | 34.55228906 | 38.6529139  | 71.45244261 | 41.80607959 | 16.16529386 | 23.80630249 | 24.37889376 |
| ENSMUSG000000057147 | -0.030752445 | 4.049502839  | 0.007598287 | 0.930537853 | 0.999071534 | Dph6          | Dph6          | DPH6        | 18.80824899 | 20.39577528 | 12.79084186 | 13.25198235 | 21.38663764 | 29.10486461 | 26.20969386 | 7.046410144 | 7.464022234 | 12.54892118 |
| ENSMUSG000000022770 | -0.021381698 | 6.334208139  | 0.007584122 | 0.930602464 | 0.999071534 | Dlg1          | Dlg1          | DLG1        | 67.5833723  | 122.9675521 | 68.66662475 | 78.54054461 | 83.7806814  | 79.96561551 | 75.97575454 | 108.5285327 | 58.53364805 | 62.4178111  |
| ENSMUSG000000033020 | 0.024248065  | 7.208902444  | 0.007581921 | 0.930612511 | 0.999071534 | Polr2f        | Polr2f        | POLR2F      | 137.2721456 | 89.82441728 | 202.9704643 | 187.2623056 | 138.7842357 | 124.2050097 | 152.6633773 | 133.2600507 | 141.4235792 | 156.600079  |
| ENSMUSG000000021013 | 0.033597096  | 3.347160896  | 0.007579969 | 0.930621421 | 0.999071534 | Ttc8          | Ttc8          | TTC8        | 7.298723488 | 12.09516906 | 9.088229746 | 7.84017804  | 15.43500454 | 12.07851881 | 16.8906916  | 9.464295978 | 7.385453579 | 3.725460977 |
| ENSMUSG000000038416 | 0.020943953  | 6.670645831  | 0.007566477 | 0.930683038 | 0.999071534 | Cdc16         | Cdc16         | CDC16       | 122.3237985 | 124.153353  | 87.85288755 | 84.22987735 | 107.8488241 | 112.0537287 | 145.7388409 | 97.12992807 | 56.01945108 | 91.50255031 |
| ENSMUSG000000034789 | 0.018792871  | 5.681067825  | 0.007555807 | 0.930731809 | 0.999071534 | Rab24         | Rab24         | RAB24       | 67.86409243 | 41.68090122 | 53.58689539 | 51.8978157  | 48.92111607 | 52.17046981 | 42.90623958 | 47.66689215 | 44.39129013 | 60.32632424 |
| ENSMUSG000000018395 | 0.030420518  | 5.702350442  | 0.007553432 | 0.930742666 | 0.999071534 | Klf3a         | Klf3a         | KIF3A       | 36.28307734 | 44.28966317 | 76.54309053 | 51.48152306 | 57.61965677 | 38.49118345 | 14.94923279 | 66.80273146 | 50.44107657 | 76.53534744 |
| ENSMUSG000000024515 | 0.019408884  | 6.555403511  | 0.007536969 | 0.930817992 | 0.999071534 | Smad4         | Smad4         | SMAD4       | 82.32117934 | 107.7300107 | 101.4515721 | 97.27371338 | 94.83371431 | 105.7961829 | 73.38714281 | 101.0676279 | 93.88954284 | 78.36539844 |
| ENSMUSG000000097068 | -0.048417716 | 1.162607084  | 0.007533294 | 0.930834819 | 0.999071534 | Gm26760       | Gm26760       |             | 1.614140771 | 1.48225111  | 1.346404407 | 4.371072713 | 2.158284533 | 1.673529715 | 1.553167044 | 1.174401691 | 2.435628308 | 2.941153403 |
| ENSMUSG000000027288 | -0.019087792 | 6.571976746  | 0.007530582 | 0.93084724  | 0.999071534 | Zfp106        | Zfp106        | ZNF106      | 89.6908287  | 120.5959503 | 90.07445482 | 83.95234892 | 113.4734444 | 140.2854474 | 77.59363688 | 78.54674837 | 72.04745672 | 95.94695989 |
| ENSMUSG000000050357 | -0.043548926 | 1.452622515  | 0.007512736 | 0.930929024 | 0.999071534 | Rltpr         | Rltpr         |             | 4.000261912 | 1.363671021 | 2.894769475 | 2.497755836 | 3.008517833 | 2.837724299 | 1.229590576 | 2.003391119 | 2.357059653 | 3.92153787  |
| ENSMUSG000000041268 | -0.032944786 | 3.010080023  | 0.007507189 | 0.930954464 | 0.999071534 | Dmxl2         | Dmxl2         | DMXL2       | 14.17636678 | 9.189956883 | 6.193460271 | 7.076974868 | 5.101399804 | 9.677367482 | 6.536244641 | 7.668152216 | 4.085570065 | 10.58815225 |
| ENSMUSG000000081721 | -0.04758425  | 1.483683329  | 0.007497963 | 0.930996794 | 0.999071534 | Gm13882       | Gm13882       |             | 1.403600671 | 5.869714396 | 2.558168373 | 1.457024238 | 2.812310149 | 2.182864846 | 1.035444696 | 3.868617334 | 2.121353688 | 3.267948225 |
| ENSMUSG000000078967 | 0.086430839  | 1.735665179  | 0.007496312 | 0.931004376 | 0.999071534 | Gm3272        | Gm3272        |             | 0           | 3.735272798 | 5.250977187 | 1.595788451 | 5.690022859 | 1.45524323  | 0.388291761 | 7.391822406 | 5.499805857 | 0           |
| ENSMUSG000000028841 | 0.083717167  | 0.078430522  | 0.007489903 | 0.9310338   | 0.999071534 | Cnksr1        | Cnksr1        | CNKSR1      | 0.421080201 | 1.837991377 | 1.144443746 | 0.763203172 | 0.457817931 | 0.072762162 | 0           | 2.556050739 | 0.31427462  | 1.503256184 |
| ENSMUSG000000024679 | 0.026002525  | 6.502645124  | 0.007477895 | 0.93108897  | 0.999071534 | Ms4a6d        | Ms4a6d        | MS4AE       | 122.0430783 | 91.01021816 | 72.50387731 | 86.03381212 | 95.35693481 | 109.0704801 | 175.4431606 | 57.7529302  | 43.36989761 | 67.05829758 |
| ENSMUSG000000006958 | -0.051627679 | 1.835140483  | 0.007458298 | 0.93111791  | 0.999071534 | Chrd          | Chrd          | CHRD        | 1.965040939 | 6.521904885 | 3.500651458 | 3.538487434 | 2.550699902 | 2.692199976 | 1.164875283 | 9.187966168 | 1.021392516 | 2.222204793 |
| ENSMUSG000000030839 | 0.028682257  | 3.473108855  | 0.007455162 | 0.931193535 | 0.999071534 | Sergef        | Sergef        | SERGEF      | 14.45708691 | 9.901437416 | 12.45424076 | 7.84017804  | 12.03407133 | 13.67928637 | 16.50239984 | 6.424668073 | 7.071178959 | 10.78422914 |
| ENSMUSG000000058064 | 0.025802962  | 3.948225861  | 0.007452992 | 0.931203525 | 0.999071534 | Gm10036       | Gm10036       | RPL11       | 20.77328993 | 15.83044186 | 11.84835878 | 18.0393477  | 12.0994739  | 13.6065242  | 18.24971276 | 15.75079915 | 8.406846095 | 18.95409971 |
| ENSMUSG000000026558 | 0.021473433  | 7.939103042  | 0.007400384 | 0.931446159 | 0.999071534 | Uck2          | Uck2          | UCK2        | 275.3162716 | 236.9230175 | 300.2481827 | 233.2626422 | 217.9213352 | 352.8964834 | 227.0212495 | 234.4658434 | 171.4368054 | 231.0439395 |
| ENSMUSG000000074909 | -0.032260604 | 2.766277927  | 0.007387089 | 0.931507612 | 0.999071534 | Ranbp6        | Ranbp6        | RANBP6      | 6.526743119 | 8.122736084 | 7.607184899 | 6.105625376 | 6.671061283 | 8.076599929 | 9.901439902 | 5.526596192 | 5.264099892 | 3.33330719  |
| ENSMUSG000000005483 | 0.025249416  | 6.433005621  | 0.007373632 | 0.931569877 | 0.999071534 | Dnajb1        | Dnajb1        | DNAJB1      | 62.24968975 | 159.7866697 | 73.10975929 | 57.1708558  | 94.04888358 | 72.25282639 | 69.76308637 | 120.479797  | 72.91171193 | 78.82291119 |
| ENSMUSG000000021591 | -0.020787995 | 6.524171557  | 0.007369491 | 0.931589047 | 0.999071534 | Glrx          | Glrx          | GLRX        | 79.65433807 | 119.2322793 | 89.46857283 | 93.38831541 | 98.69246545 | 75.89093447 | 73.32242751 | 125.2464862 | 68.51186725 | 93.39796028 |
| ENSMUSG000000031149 | -0.020686138 | 6.412265866  | 0.007343568 | 0.93170918  | 0.999071534 | Praf2         | Praf2         | PRAF2       | 69.05715301 | 95.39768145 | 82.46726992 | 86.03381212 | 111.9037829 | 68.68748048 | 74.29315691 | 113.2952219 | 60.02645249 | 88.16924312 |
| ENSMUSG000000097467 | 0.048711696  | 1.202019469  | 0.007335303 | 0.931747527 | 0.999071534 | Gm26737       | Gm26737       |             | 1.614140771 | 1.245090933 | 3.837252559 | 2.289609516 | 2.027479409 | 1.8918162   | 1.29430587  | 1.243484143 | 1.335667137 | 4.901922338 |
| ENSMUSG000000084890 | 0.068690893  | -0.328795505 | 0.007332759 | 0.931759335 | 0.999071534 | A830036E02Rik | A830036E02Rik |             | 1.052700503 | 0.711480533 | 0.269280881 | 1.110113705 | 0.196207685 | 0.582097292 | 0.323576467 | 0.345412262 | 0.628549241 | 1.372538255 |
| ENSMUSG000000079137 | -0.076097086 | -0.094517151 | 0.007299032 | 0.931916066 | 0.999071534 | Rpl27-ps1     | Rpl27-ps1     |             | 1.824680872 | 0.830060622 | 0.336601102 | 0.346910533 | 0.981038424 | 0.145524323 | 1.617882337 | 1.657978857 | 0.15713731  | 0.130717929 |
| ENSMUSG000000046733 | 0.02569906   | 4.744062824  | 0.007288305 | 0.931965995 | 0.999071534 | Gprc5a        | Gprc5a        | GPRCSA      | 26.03679244 | 28.5778014  | 29.95749805 | 21.02277828 | 32.11265774 | 37.2542267  | 42.25908664 | 27.01123889 | 8.799689371 | 19.41161246 |
| ENSMUSG000000032966 | -0.022050699 | 8.212089763  | 0.007278791 | 0.932010305 | 0.999071534 | Fkbp1a        | Fkbp1a        | FKBP1C      | 291.1769592 | 309.4940318 | 346.9684156 | 272.6716787 | 332.0488052 | 413.7256504 | 326.8122321 | 279.2312726 | 165.9369996 | 271.7625744 |
| ENSMUSG000000074497 | -0.045919433 | 1.21636123   | 0.007260743 | 0.932094444 | 0.999071534 | A430078G23Rik | A430078G23Rik | CTB-133G6.1 | 1.965040939 | 2.193731643 | 3.433331237 | 2.289609516 | 1.63506404  | 1.091432423 | 1.100159989 | 3.039627905 | 1.728510412 | 3.202589261 |
| ENSMUSG000000091020 | 0.081325313  | -0.039077177 | 0.007257892 | 0.932107746 | 0.999071534 | Gm5828        | Gm5828        |             | 1.543960738 | 1.245090933 | 0.605881983 | 0           | 0.850233301 | 1.8918162   | 1.68259763  | 0.483577167 | 0           | 0.392153787 |
| ENSMUSG000000027030 | -0.034566325 | 2.888665277  | 0.00723609  | 0.93220955  | 0.999071534 | Stk39         | Stk39         | STK39       | 12.1411458  | 6.818355107 | 6.260780492 | 7.770795933 | 5.232204928 | 11.78747017 | 9.319002261 | 3.039627905 | 4.00700141  | 7.843075741 |
| ENSMUSG000000059920 | 0.018982334  | 4.961424077  | 0.007226188 | 0.932255835 | 0.999071534 | 4930453N24Rik | 4930453N24Rik | C3orf38     | 33.54605603 | 26.73981003 | 37.16076163 | 32.8871185  | 29.36575016 | 36.09003212 | 35.14040436 | 28.39288793 | 27.2632332  | 23.98673997 |
| ENSMUSG000000022382 | -0.019720023 | 6.807620298  | 0.007202976 | 0.932364467 | 0.999071534 | Wnt7b         | Wnt7b         | WNT7B       | 119.235877  | 106.6627899 | 101.2496114 | 110.3175494 | 148.4638148 | 133.3730421 | 81.73541566 | 121.3778689 | 73.46169252 | 132.6786979 |
| ENSMUSG000000044502 | 0.01803242   | 6.036826044  | 0.007201912 | 0.932369449 | 0.999071534 | Bod1          | Bod1          | BOD1L2      | 62.24968975 | 56.50341232 | 73.64832105 | 71.39418764 | 73.64328436 | 65.12213456 | 72.28698282 | 54.50605494 | 53.1909795  | 72.61380956 |
| ENSMUSG000000044788 | -0.071188707 | 0.23818522   | 0.007191608 | 0.932417733 | 0.999071534 | Fad6          | Fad6          | FAD6        | 0.421080201 | 0.830060622 | 0.269280881 | 3.746633754 | 0.130805123 | 0.800383777 | 0.906014109 | 0.690824524 | 1.257098482 | 1.176461361 |
| ENSMUSG000000022505 | 0.023166278  | 6.858354637  | 0.007185063 | 0.932448417 | 0.999071534 | Emp2          | Emp2          | EMP2        | 92.07620401 | 139.8652148 | 117.8777058 | 133.6299372 | 111.3151598 | 88.1149776  | 72.73998987 | 135.6779365 | 127.3597899 | 123.7898788 |
| ENSMUSG000000024960 | 0.020896283  | 5.953507937  | 0.007179139 | 0.932476206 | 0.999071534 | Plcb3         | Plcb3         | PLCB3       | 53.05610536 | 68.00568093 | 75.73524788 | 46.20848296 | 76.84800988 | 71.23415613 | 35.14040436 | 72.32932766 | 48.31972289 | 74.44386057 |

|                    |              |              |             |             |             |            |            |              |             |             |             |             |             |             |             |             |             |             |
|--------------------|--------------|--------------|-------------|-------------|-------------|------------|------------|--------------|-------------|-------------|-------------|-------------|-------------|-------------|-------------|-------------|-------------|-------------|
| ENSMUSG00000055866 | 0.029214739  | 4.694385316  | 0.007172408 | 0.93250779  | 0.999071534 | Per2       | Per2       | PER2         | 30.94939479 | 22.41163679 | 23.831358   | 27.82222473 | 27.27286819 | 16.29872418 | 9.383717555 | 43.52194501 | 21.92065477 | 31.37230296 |
| ENSMUSG00000046768 | 0.023654179  | 4.388086835  | 0.007152299 | 0.932602245 | 0.999071534 | Rhoj       | Rhoj       | RHOJ         | 18.52752886 | 14.52606088 | 25.71632417 | 27.82222473 | 19.81697616 | 29.83248622 | 23.16807507 | 12.43484143 | 18.38506529 | 18.75802281 |
| ENSMUSG00000044452 | 0.023054234  | 3.956323014  | 0.007149517 | 0.932615322 | 0.999071534 | Zfp507     | Zfp507     | ZNF507       | 15.72032751 | 17.66843323 | 12.99280253 | 15.26406344 | 17.65869163 | 17.82672957 | 10.22501637 | 16.02712896 | 14.14235792 | 16.47045906 |
| ENSMUSG00000032540 | -0.018022416 | 5.793034317  | 0.007148248 | 0.932621286 | 0.999071534 | Abhd5      | Abhd5      | ABHD5        | 61.26716928 | 73.81610529 | 51.9712101  | 48.98376722 | 53.56469795 | 56.31791302 | 66.33317582 | 58.58191963 | 35.98444403 | 49.73817199 |
| ENSMUSG00000002820 | 0.039802421  | 2.729412424  | 0.007134066 | 0.932688002 | 0.999071534 | Atg4d      | Atg4d      | ATG4D        | 10.8779052  | 9.130666839 | 4.106533441 | 3.260959008 | 6.213243352 | 8.513172898 | 12.74891282 | 5.319348834 | 1.807079067 | 4.575127515 |
| ENSMUSG00000063972 | -0.043993616 | 1.798947107  | 0.007133088 | 0.932692603 | 0.999071534 | Nr6a1      | Nr6a1      | NR6A1        | 3.789721811 | 1.304380977 | 4.241173882 | 5.273040098 | 2.87771271  | 3.638108076 | 1.29430587  | 4.490359406 | 1.807079067 | 4.836563373 |
| ENSMUSG00000040043 | -0.022757745 | 6.834116373  | 0.007131518 | 0.932699992 | 0.999071534 | Rbms2      | Rbms2      | RBMS2        | 95.37466558 | 152.7904444 | 115.0502566 | 95.19225019 | 139.6998716 | 92.33518297 | 80.18224862 | 171.5317293 | 83.43991171 | 112.6134958 |
| ENSMUSG00000029165 | 0.040379908  | 1.86117931   | 0.007128269 | 0.93271529  | 0.999071534 | Agb15      | Agb15      | AGBL5        | 3.859901845 | 3.972432975 | 1.279084186 | 4.509836926 | 4.251166504 | 4.511254014 | 3.429910554 | 4.90485412  | 1.414235792 | 3.267948225 |
| ENSMUSG00000079511 | 0.053068596  | 0.720847309  | 0.007077749 | 0.932953584 | 0.999071534 | Ccdc142    | Gm42688    | CCDC142      | 2.596661241 | 1.48225111  | 1.211763966 | 0.832585279 | 1.63506404  | 3.34705943  | 0.776583522 | 0.690824524 | 0.471411931 | 2.61435858  |
| ENSMUSG00000030847 | 0.019114126  | 5.744675324  | 0.007060479 | 0.93303524  | 0.999071534 | Bag3       | Bag3       | BAG3         | 49.12602348 | 61.18732583 | 55.06794024 | 55.15877471 | 55.0035543  | 63.37584269 | 33.65195261 | 43.2456152  | 51.06962581 | 67.97332309 |
| ENSMUSG00000023074 | 0.022488879  | 4.835439181  | 0.007048388 | 0.933092468 | 0.999071534 | Mospd1     | Mospd1     | MOSPD1       | 18.73806896 | 28.87425163 | 28.88037453 | 39.27027231 | 29.56195784 | 23.42941601 | 29.44545853 | 37.78810146 | 21.29210553 | 25.09784237 |
| ENSMUSG00000036817 | 0.017921825  | 6.161097702  | 0.0070394   | 0.93313504  | 0.999071534 | Sun1       | Sun1       | SUN1         | 76.14533639 | 86.44488475 | 64.56009131 | 64.24783066 | 77.89445086 | 73.5625453  | 72.15755223 | 77.30326423 | 65.52625835 | 55.75119672 |
| ENSMUSG00000032116 | -0.022432935 | 7.282863537  | 0.007011852 | 0.933265695 | 0.999071534 | Stt3a      | Stt3a      | STT3A        | 157.2032751 | 208.0487658 | 153.1535013 | 130.7852708 | 167.2997526 | 208.9001657 | 217.3139555 | 148.5963551 | 89.56826681 | 98.6920364  |
| ENSMUSG00000029547 | -0.022221394 | 5.053070851  | 0.006995716 | 0.933342347 | 0.999071534 | Ints1      | Ints1      | INTS1        | 41.96766006 | 43.45960255 | 27.73593078 | 22.2716562  | 38.78371903 | 60.10154542 | 22.19734566 | 26.87307398 | 20.19214436 | 35.3591998  |
| ENSMUSG00000052406 | 0.021637477  | 4.587410616  | 0.006993511 | 0.93335283  | 0.999071534 | Rexo4      | Rexo4      | REXO4        | 30.59849462 | 27.21413038 | 25.58168373 | 16.09664872 | 24.39515548 | 32.81573485 | 26.92156209 | 14.64547991 | 17.75651605 | 26.20894477 |
| ENSMUSG00000027531 | 0.017827495  | 5.902927854  | 0.006988239 | 0.933377897 | 0.999071534 | Impa1      | Impa1      | IMPA1        | 62.31986979 | 56.79986254 | 61.32872073 | 64.38659488 | 62.85186169 | 90.66165326 | 63.5504182  | 38.96250315 | 45.25554534 | 58.03876048 |
| ENSMUSG00000041881 | -0.024509989 | 7.473048985  | 0.00697687  | 0.933431986 | 0.999071534 | Ndufa7     | Ndufa7     | CTD-2550O8.5 | 224.0146671 | 144.134098  | 168.0985902 | 233.6095528 | 155.2656812 | 100.0479721 | 205.5357721 | 178.9235517 | 153.0517401 | 193.0050222 |
| ENSMUSG00000092086 | 0.129266351  | -1.216431101 | 0.006959894 | 0.933512832 | 0.999071534 | Gm6793     | Gm6793     |              | 1.122880537 | 0           | 0.06732022  | 0.277528426 | 0           | 0           | 1.229590576 | 0           | 0           | 0.261435858 |
| ENSMUSG00000004934 | 0.023157054  | 5.564719545  | 0.00695053  | 0.933557471 | 0.999071534 | Pias4      | Pias4      | PIAS4        | 44.07306106 | 44.88256362 | 58.70323214 | 43.36381659 | 52.12584159 | 38.34565912 | 21.48547744 | 58.16742492 | 45.17697668 | 61.89493939 |
| ENSMUSG00000023883 | 0.022351035  | 5.326622962  | 0.006944826 | 0.933584674 | 0.999071534 | Phf10      | Phf10      | PHF10        | 51.37178455 | 49.03286672 | 28.61109365 | 36.77251647 | 40.876601   | 54.20781033 | 64.84472407 | 28.04747567 | 22.78490998 | 29.80368781 |
| ENSMUSG00000028901 | -0.018909038 | 4.710634436  | 0.006880476 | 0.93389238  | 0.999071534 | Gmeb1      | Gmeb1      | GMEB1        | 31.72137516 | 24.9611087  | 26.52416681 | 27.96098894 | 24.85297341 | 31.06944297 | 20.57946333 | 29.63637208 | 19.79930108 | 24.57497065 |
| ENSMUSG00000061758 | 0.025372995  | 3.950547729  | 0.006858562 | 0.933997499 | 0.999071534 | Akr1b10    | Akr1b10    | AKR1B10      | 16.00104765 | 13.45884008 | 18.51306059 | 14.36209606 | 16.54684808 | 10.98708639 | 9.901439902 | 19.89574629 | 16.26371161 | 15.49007459 |
| ENSMUSG00000080875 | -0.13935952  | 4.040708061  | 0.006844631 | 0.934064414 | 0.999071534 | Gm7332     | Gm7332     |              | 65.12707113 | 25.61329918 | 0           | 0           | 0           | 59.88325893 | 26.20969386 | 0.690824524 | 0           | 0           |
| ENSMUSG00000030255 | 0.025575177  | 4.024471735  | 0.006839363 | 0.934089734 | 0.999071534 | Sspn       | Sspn       | SSPN         | 16.21158775 | 17.31269297 | 11.04051614 | 20.05142879 | 18.24731469 | 22.84731872 | 23.10335977 | 9.602460883 | 8.249708785 | 17.25476663 |
| ENSMUSG00000015749 | -0.022117555 | 7.235372648  | 0.0068362   | 0.934104943 | 0.999071534 | Anp32e     | Anp32e     | ANP32E       | 140.149527  | 113.8961753 | 204.5188294 | 146.7431554 | 182.0807315 | 227.6000412 | 133.1193587 | 88.56370397 | 128.6168884 | 155.9464893 |
| ENSMUSG00000033478 | -0.019728951 | 4.766806496  | 0.006832874 | 0.934120938 | 0.999071534 | Fam160b1   | Fam160b1   | FAM160B1     | 23.36995117 | 31.12727331 | 28.1398521  | 31.29133005 | 27.20746562 | 26.55818896 | 20.38531745 | 26.66582662 | 25.92765618 | 28.88866231 |
| ENSMUSG00000044469 | -0.041830448 | 2.236667827  | 0.006819962 | 0.93418307  | 0.999071534 | Tnfaip8l1  | Tnfaip8l1  | TNFAIP8L1    | 6.877643287 | 3.853852886 | 3.90457278  | 4.371072713 | 5.166802366 | 11.93299449 | 5.112508185 | 1.036236786 | 2.278490998 | 3.137230296 |
| ENSMUSG00000002980 | -0.064601841 | 0.445477544  | 0.006807071 | 0.93424516  | 0.999071534 | Bcam       | Bcam       | BCAM         | 1.684320805 | 1.48225111  | 0.875162864 | 1.248877918 | 1.177246109 | 3.419821592 | 2.070889391 | 0.414494714 | 0           | 0.457512752 |
| ENSMUSG00000022571 | -0.022122926 | 5.173516971  | 0.006802215 | 0.934268566 | 0.999071534 | Pycrl      | Pycrl      | PYCLR        | 51.58232465 | 26.62122994 | 35.34311568 | 38.02139439 | 36.62543449 | 47.87750228 | 46.6597266  | 17.20153065 | 25.53481291 | 38.3003532  |
| ENSMUSG00000043089 | -0.049510557 | 0.524569254  | 0.006788954 | 0.934332528 | 0.999071534 | Mmp1a      | Mmp1a      | MMP1         | 2.035220973 | 1.541541155 | 0.538561763 | 1.179495811 | 1.63506404  | 0.727621615 | 1.617882337 | 1.174401691 | 1.335667137 | 1.176461361 |
| ENSMUSG00000024085 | -0.019071396 | 6.656217374  | 0.006779204 | 0.934379592 | 0.999071534 | Man2a1     | Man2a1     | MAN2A1       | 100.2872679 | 113.9554654 | 99.16268456 | 85.68690159 | 129.1046566 | 146.1064203 | 119.7880082 | 76.6124397  | 78.80436106 | 70.5223227  |
| ENSMUSG00000025257 | -0.047925983 | 1.327457986  | 0.006758134 | 0.934481416 | 0.999071534 | Ribc1      | Ribc1      | RIBC1        | 1.122880537 | 1.363671021 | 3.769932339 | 3.469105327 | 2.746907587 | 1.309718907 | 1.035444696 | 2.486968286 | 3.928432755 | 1.895409971 |
| ENSMUSG00000032388 | 0.01837506   | 5.67678717   | 0.006754929 | 0.93449692  | 0.999071534 | Spg21      | Spg21      | SPG21        | 49.82782381 | 63.20318734 | 46.6529127  | 48.42871037 | 55.39596967 | 46.13121041 | 60.76766058 | 63.90126846 | 32.21314859 | 45.16304447 |
| ENSMUSG00000001052 | 0.017818722  | 5.887338634  | 0.006750179 | 0.934519899 | 0.999071534 | Sec24b     | Sec24b     | SEC24B       | 62.39004982 | 61.95809641 | 67.99342255 | 55.43630313 | 57.03103371 | 78.43761012 | 37.6643008  | 54.16064268 | 48.79113482 | 70.39160477 |
| ENSMUSG00000036356 | 0.023225062  | 4.727479596  | 0.006736075 | 0.934588193 | 0.999071534 | Csgalnact1 | Csgalnact1 | CSGALNACT1   | 27.51057315 | 41.08800077 | 17.70521795 | 21.50845303 | 28.51551686 | 38.49118345 | 37.98787727 | 19.68849893 | 15.08518178 | 20.78415071 |
| ENSMUSG00000074264 | 0.055833994  | 1.333121998  | 0.006722733 | 0.934652856 | 0.999071534 | Amy1       | Amy1       | AMY2B        | 2.456301174 | 0.652190488 | 5.452937848 | 2.914048475 | 0.588623054 | 0.727621615 | 1.164875283 | 2.003391119 | 2.514196963 | 4.901922338 |
| ENSMUSG00000047789 | -0.030784414 | 2.840837645  | 0.006719087 | 0.93467054  | 0.999071534 | Slc38a9    | Slc38a9    | SLC38A9      | 4.982782381 | 7.707705773 | 9.963392611 | 5.897479057 | 8.371527884 | 6.112021568 | 6.859821109 | 6.977327692 | 3.8498641   | 9.934562605 |
| ENSMUSG00000025781 | 0.021270599  | 7.587815206  | 0.006712578 | 0.93470212  | 0.999071534 | Atp5c1     | Atp5c1     | ATP5C1       | 207.0310989 | 201.5268609 | 185.1979262 | 200.4449058 | 196.0114771 | 179.6497768 | 283.7118466 | 164.5544016 | 148.4161895 | 157.1883096 |
| ENSMUSG00000054381 | -0.034785695 | 2.274815433  | 0.006707915 | 0.934724752 | 0.999071534 | Zfp747     | Zfp747     | AC002310.13  | 7.439083555 | 5.336103997 | 2.894769475 | 4.371072713 | 4.774386997 | 8.367648575 | 5.112508185 | 2.417885834 | 2.907040239 | 4.509768551 |

|                    |              |              |             |             |             |               |               |               |             |             |             |             |             |             |             |             |             |             |
|--------------------|--------------|--------------|-------------|-------------|-------------|---------------|---------------|---------------|-------------|-------------|-------------|-------------|-------------|-------------|-------------|-------------|-------------|-------------|
| ENSMUSG00000045098 | 0.01937282   | 5.049949969  | 0.00669472  | 0.934788845 | 0.999071534 | Suv420h1      | Suv420h1      | KMT5B         | 32.91443573 | 35.69260673 | 26.7934477  | 33.44217536 | 41.46522405 | 38.12737264 | 21.55019273 | 41.86396615 | 25.61338156 | 33.59450776 |
| ENSMUSG00000045322 | -0.124303409 | 0.014857123  | 0.006693948 | 0.934792596 | 0.999071534 | Tlr9          | Tlr9          | TLR9          | 2.035220973 | 2.608761954 | 0           | 0           | 0.065402562 | 4.147443207 | 0.582437641 | 0           | 0           | 0           |
| ENSMUSG00000015478 | 0.018347182  | 5.258100487  | 0.006693003 | 0.934797188 | 0.999071534 | Rnf5          | Rnf5          | RNF5          | 32.98461576 | 29.82289234 | 43.89278366 | 41.97617446 | 47.6784674  | 36.74489157 | 35.98170317 | 37.4426892  | 32.44885456 | 41.50294246 |
| ENSMUSG00000030170 | -0.034221322 | 2.956104498  | 0.006680058 | 0.93486013  | 0.999071534 | Wnt5b         | Wnt5b         | WNT5B         | 8.211063924 | 7.707705773 | 7.87646578  | 7.770795933 | 8.502333007 | 11.71470801 | 11.71346812 | 4.90485412  | 1.571373102 | 8.300588492 |
| ENSMUSG00000020349 | -0.020283178 | 8.228488286  | 0.006673938 | 0.93488991  | 0.999071534 | Ppp2ca        | Ppp2ca        | PPP2CA        | 317.2839316 | 304.2172179 | 311.4906595 | 301.8815456 | 332.9644411 | 329.3943052 | 332.8954697 | 272.7375221 | 204.1213659 | 310.3243635 |
| ENSMUSG00000002346 | -0.035765676 | 2.165392538  | 0.006652632 | 0.934993694 | 0.999071534 | Slc25a42      | Slc25a42      | SLC25A42      | 4.210802013 | 2.727342043 | 5.99149961  | 4.926129565 | 4.970594681 | 5.166113468 | 3.429910554 | 3.45412262  | 5.892649132 | 2.418281687 |
| ENSMUSG00000039294 | 0.01787944   | 5.776046692  | 0.006636805 | 0.935070894 | 0.999071534 | Bcl17643      | Bcl17643      | C17orf62      | 72.35561458 | 52.4716893  | 44.90258697 | 48.49809248 | 64.8793411  | 57.11829679 | 73.06356634 | 47.39056234 | 38.73434696 | 50.71855646 |
| ENSMUSG00000002578 | -0.067579924 | -0.185357052 | 0.006621933 | 0.935143521 | 0.999071534 | Ikzf4         | Ikzf4         | IKZF4         | 1.052700503 | 0.5336104   | 1.683005509 | 0           | 0.719428178 | 1.164194584 | 0.517722348 | 0.898071881 | 0.31427462  | 0.71894861  |
| ENSMUSG00000024403 | -0.054737938 | 0.875476689  | 0.00661632  | 0.935170954 | 0.999071534 | Atp6v1g2      | Atp6v1g2      | ATP6V1G2      | 0.701800335 | 1.897281421 | 1.077123525 | 2.914048475 | 2.289089656 | 1.819054038 | 1.229590576 | 2.279720929 | 0.078568655 | 2.875794438 |
| ENSMUSG00000039246 | 0.039572567  | 2.620174585  | 0.006612404 | 0.935190102 | 0.999071534 | Lyp1a1        | Lyp1a1        | LYPLAL1       | 6.175842952 | 5.632554219 | 5.250977187 | 8.117706466 | 5.428412612 | 8.367648575 | 12.55476693 | 3.523205072 | 0.942823861 | 5.424794054 |
| ENSMUSG00000032589 | -0.026731724 | 3.422001385  | 0.006564836 | 0.935423125 | 0.999071534 | Bsn           | Bsn           | BSN           | 8.000523824 | 13.39955004 | 10.70391503 | 8.742145425 | 14.78097892 | 11.49642152 | 8.412988152 | 14.92180972 | 7.385453579 | 8.56202435  |
| ENSMUSG00000045679 | 0.020492164  | 4.678726659  | 0.006556303 | 0.935465015 | 0.999071534 | Pqlc3         | Pqlc3         | PQLC3         | 22.8085109  | 24.66465847 | 22.48495359 | 35.03796381 | 25.50699902 | 21.68312413 | 23.55636683 | 29.42912472 | 23.41345922 | 23.92138101 |
| ENSMUSG00000032175 | -0.024744828 | 4.030595588  | 0.006553134 | 0.935480578 | 0.999071534 | Tyk2          | Tyk2          | TYK2          | 20.98383003 | 21.46299608 | 13.80064517 | 10.33793388 | 18.9013403  | 20.51892955 | 8.477703446 | 14.99089217 | 13.43524002 | 20.65343278 |
| ENSMUSG00000054612 | 0.075754442  | 0.315806276  | 0.006546592 | 0.935512724 | 0.999071534 | Mgmt          | Mgmt          | MGMT          | 4.000261912 | 1.007930755 | 0.201960661 | 0.20814632  | 0.261610246 | 1.673529715 | 2.265035272 | 1.036236786 | 0           | 0.784307574 |
| ENSMUSG00000069662 | -0.024479517 | 8.093891019  | 0.006544216 | 0.935524401 | 0.999071534 | Marcks        | Marcks        | MARCKS        | 210.3295605 | 231.1718831 | 359.9612182 | 307.5014962 | 316.2867879 | 223.452598  | 162.1118102 | 294.2912472 | 298.4037521 | 294.3114172 |
| ENSMUSG00000045464 | 0.040445545  | 1.226269201  | 0.006531263 | 0.9355881   | 0.999071534 | 2810002D19Rik | 2810002D19Rik |               | 2.596661241 | 2.668051998 | 2.288887492 | 1.734552664 | 2.027479409 | 1.309718907 | 3.365195261 | 1.865226215 | 1.414235792 | 2.745076509 |
| ENSMUSG00000039883 | -0.024566729 | 4.958938376  | 0.006530584 | 0.93559144  | 0.999071534 | Lrrc17        | Lrrc17        | LRRC17        | 21.7558104  | 21.81873634 | 31.37122268 | 46.06971875 | 39.89556257 | 17.75396741 | 35.52869612 | 25.42234248 | 27.18475466 | 39.15001974 |
| ENSMUSG00000020708 | 0.019808025  | 7.069039475  | 0.006518123 | 0.935652787 | 0.999071534 | Psmc5         | Psmc5         | PSMC5         | 131.3770228 | 108.8565215 | 172.0704832 | 135.5032541 | 143.0354022 | 163.7876256 | 149.2981821 | 86.97480756 | 107.3247829 | 150.4563363 |
| ENSMUSG00000054304 | 0.060566584  | 0.245216935  | 0.006510817 | 0.93568878  | 0.999071534 | D130007C19Rik | D130007C19Rik |               | 0.912340436 | 0.711480533 | 1.279084186 | 1.457024238 | 0.981038424 | 0.218286485 | 0.19414588  | 1.865226215 | 1.178529826 | 1.503256184 |
| ENSMUSG00000040048 | 0.020152324  | 6.468778489  | 0.006504515 | 0.935719844 | 0.999071534 | Ndufb10       | Ndufb10       | NDUFB10       | 106.9543711 | 60.53513534 | 101.3169316 | 100.6734366 | 85.28494032 | 80.54771281 | 123.5414953 | 64.8684228  | 75.5830462  | 82.80980803 |
| ENSMUSG00000039615 | 0.018850478  | 6.913897454  | 0.00649889  | 0.935747586 | 0.999071534 | Stub1         | Stub1         | STUB1         | 136.079085  | 104.0540279 | 162.3090512 | 105.7383304 | 113.5388469 | 137.6660096 | 100.114559  | 107.8377082 | 95.85375922 | 146.0772857 |
| ENSMUSG00000087008 | -0.069015787 | 0.813724142  | 0.006497278 | 0.935755538 | 0.999071534 | Gm5530        | Gm5530        |               | 2.947561409 | 3.320242487 | 0.740522424 | 0           | 1.700466601 | 2.473913492 | 2.9769035   | 0.483577167 | 0.078568655 | 2.0261279   |
| ENSMUSG00000090381 | -0.02948233  | 3.487340388  | 0.006489455 | 0.935794142 | 0.999071534 | Gm6158        | Gm6158        |               | 12.562226   | 11.02794826 | 9.222870187 | 12.35001497 | 12.9497072  | 13.38823772 | 17.79670571 | 10.84594503 | 2.985608894 | 9.673126747 |
| ENSMUSG00000011296 | -0.01853839  | 4.867816075  | 0.006472356 | 0.9358786   | 0.999071534 | Tjap1         | Tjap1         | TJAP1         | 35.30055687 | 29.70431225 | 27.1300488  | 23.72868044 | 36.69083706 | 42.05652936 | 25.30367975 | 30.60352641 | 21.84208612 | 21.96061207 |
| ENSMUSG00000037752 | -0.040063457 | 1.918914458  | 0.006444551 | 0.936016189 | 0.999071534 | Xkr8          | Xkr8          | XKR8          | 2.315941107 | 2.905212176 | 3.366011017 | 6.105625376 | 4.316569065 | 2.255627007 | 3.041618794 | 2.348803381 | 2.278490998 | 7.320204025 |
| ENSMUSG00000036225 | -0.039865205 | 1.348022668  | 0.006435408 | 0.936061491 | 0.999071534 | Kctd1         | Kctd1         | KCTD1         | 3.36864161  | 1.778701332 | 2.558168373 | 2.636520049 | 2.354492217 | 4.584016176 | 1.747312924 | 1.174401691 | 2.278490998 | 2.0261279   |
| ENSMUSG00000087380 | -0.034118377 | 2.027993619  | 0.00638432  | 0.936315249 | 0.999071534 | 2210408F21Rik | 2210408F21Rik |               | 4.491522147 | 4.921073686 | 2.558168373 | 5.203657991 | 3.466335765 | 3.565345915 | 3.365195261 | 3.315957715 | 2.907040239 | 5.620870947 |
| ENSMUSG00000022671 | -0.02220679  | 3.825948768  | 0.006383505 | 0.936319306 | 0.999071534 | Mzt2          | Mzt2          | MZT2B         | 14.80798708 | 11.97658897 | 18.51306059 | 13.66827499 | 14.51936867 | 17.75396741 | 12.68419752 | 16.23437631 | 9.192532646 | 12.35284429 |
| ENSMUSG00000049470 | -0.019321496 | 6.720510521  | 0.006378763 | 0.936342908 | 0.999071534 | Aff4          | Aff4          | AFF4          | 79.86487817 | 147.2171803 | 106.1639875 | 95.19225019 | 122.8260107 | 121.2945233 | 78.3702204  | 130.565835  | 84.46130423 | 90.97967859 |
| ENSMUSG00000089715 | 0.021996608  | 6.901645156  | 0.006370247 | 0.936385326 | 0.999071534 | Cbx6          | Cbx6          | CBX6          | 92.14638404 | 87.68997568 | 147.1620017 | 131.548474  | 155.3964864 | 145.0877501 | 64.90943936 | 107.4922959 | 110.8603723 | 152.1556694 |
| ENSMUSG00000034681 | -0.018323343 | 6.932142353  | 0.006362051 | 0.936426179 | 0.999071534 | Rnps1         | Rnps1         | RNP51         | 114.0425545 | 110.3980627 | 157.0580741 | 121.6962149 | 133.6174333 | 140.2126853 | 91.6385557  | 129.5986807 | 100.2536039 | 124.2473915 |
| ENSMUSG00000030751 | 0.020780619  | 7.425543946  | 0.006351475 | 0.936478928 | 0.999071534 | Psma1         | Psma1         | RP11-140L24.4 | 222.2601662 | 134.3512406 | 179.2737468 | 175.5367296 | 174.0362164 | 193.9839226 | 234.3340777 | 114.676871  | 138.045127  | 158.8222837 |
| ENSMUSG00000009563 | -0.019736697 | 4.652537986  | 0.00634989  | 0.936486839 | 0.999071534 | Tor2a         | Tor2a         | TOR2A         | 29.26507399 | 21.04796576 | 29.75553739 | 26.15705417 | 24.46055804 | 30.19629703 | 34.6873973  | 18.79042705 | 15.71373102 | 22.54884275 |
| ENSMUSG00000017314 | -0.078548297 | -0.632664261 | 0.006336365 | 0.936554369 | 0.999071534 | Mpp2          | Mpp2          | MPP2          | 0.701800335 | 0.5336104   | 0.403921322 | 0.346910533 | 0.719428178 | 1.018670261 | 1.100159989 | 0.414494714 | 0           | 0           |
| ENSMUSG00000033628 | -0.01995526  | 4.404920476  | 0.006329326 | 0.936589545 | 0.999071534 | Plk3c3        | Plk3c3        | PIK3C3        | 22.1768906  | 30.59366291 | 18.44574037 | 19.35760773 | 19.62076848 | 25.17570789 | 15.9199622  | 20.58657081 | 15.71373102 | 24.3135348  |
| ENSMUSG00000031562 | -0.041894014 | 2.597496681  | 0.006323521 | 0.936618571 | 0.999071534 | Dctd          | Dctd          | DCTD          | 8.91286426  | 5.217523908 | 6.799342255 | 3.399723221 | 7.063476652 | 14.04309717 | 10.41916225 | 2.141556024 | 1.728510412 | 2.091486864 |
| ENSMUSG00000024212 | -0.02216799  | 5.029643685  | 0.00631257  | 0.93667336  | 0.999071534 | Mlt1          | Mlt1          | MLLT1         | 37.96739815 | 38.83497909 | 31.70782378 | 17.48429085 | 45.78179312 | 63.23031836 | 25.36839504 | 25.14601267 | 21.13496822 | 27.71220095 |
| ENSMUSG00000027067 | 0.019670693  | 7.04897643   | 0.006284597 | 0.936813533 | 0.999071534 | Ssrp1         | Ssrp1         | SSRP1         | 149.0623912 | 155.2806263 | 135.3809631 | 104.836363  | 140.0922869 | 217.7043873 | 153.1163844 | 97.75167014 | 78.25438048 | 119.0186744 |
| ENSMUSG00000097989 | -0.061368038 | -0.137309809 | 0.006265039 | 0.936911726 | 0.999071534 | Gm4335        | Gm4335        |               | 0.280720134 | 1.067220799 | 0.269280881 | 0.901967385 | 1.569661478 | 1.309718907 | 0.258861174 | 1.174401691 | 0.31427462  | 0.71894861  |

|                     |              |              |             |              |             |           |           |          |             |             |             |             |             |             |             |             |             |             |
|---------------------|--------------|--------------|-------------|--------------|-------------|-----------|-----------|----------|-------------|-------------|-------------|-------------|-------------|-------------|-------------|-------------|-------------|-------------|
| ENSMUSG00000026754  | 0.023117299  | 3.98195977   | 0.006255237 | 0.936960992  | 0.999071534 | Golga1    | Golga1    | GOLGA1   | 17.19410822 | 15.05967128 | 14.00260583 | 13.8070392  | 20.92881971 | 15.57110257 | 19.22044216 | 16.78703593 | 7.071178959 | 18.69266385 |
| ENSMUSG00000078812  | -0.024715698 | 9.403024626  | 0.006253777 | 0.936968336  | 0.999071534 | Elf5a     | Elf5a     | EIF5A    | 844.4061636 | 709.5832515 | 715.6139422 | 534.2422204 | 755.464989  | 1061.745461 | 1084.693034 | 412.145911  | 315.0603069 | 500.845745  |
| ENSMUSG00000050730  | 0.019081993  | 4.273569167  | 0.006194342 | 0.937267952  | 0.999071534 | Arhgap42  | Arhgap42  | ARHGA42  | 24.91391191 | 19.38784452 | 19.45554368 | 18.38625824 | 17.00466601 | 23.64770249 | 19.47930334 | 15.8198816  | 15.00661312 | 20.19592003 |
| ENSMUSG00000070858  | 0.031171674  | 2.979516753  | 0.006145909 | 0.937513174  | 0.999071534 | Gm1673    | Gm1673    | C4orf48  | 7.649623656 | 4.624623464 | 11.37711724 | 10.12978756 | 5.75542542  | 4.947826984 | 6.083237587 | 9.740625788 | 6.835472994 | 9.411690889 |
| ENSMUSG00000000359  | -0.039995458 | 1.778825103  | 0.00614023  | 0.937541995  | 0.999071534 | Rem1      | Rem1      | REM1     | 5.193322482 | 3.616692709 | 5.049016526 | 1.80393477  | 1.765869163 | 4.729540499 | 4.012348196 | 1.934308667 | 1.099961171 | 4.509768551 |
| ENSMUSG00000025644  | -0.125252307 | -1.085315906 | 0.00613465  | 0.93757032   | 0.999071534 | Gm7628    | Gm7628    |          | 0           | 0           | 1.144443746 | 0.693821065 | 0.065402562 | 0           | 0.129430587 | 0           | 1.257098482 | 0           |
| ENSMUSG00000026679  | 0.051966005  | 0.599936005  | 0.006126828 | 0.937610051  | 0.999071534 | Enkur     | Enkur     | ENKUR    | 0.631620302 | 1.185800888 | 1.615685288 | 2.705902155 | 0.784830739 | 0.582097292 | 1.164875283 | 2.141556024 | 0.549980586 | 2.287563758 |
| ENSMUSG00000027456  | 0.044874565  | 1.056469949  | 0.00612211  | 0.937634031  | 0.999071534 | Sdcbp2    | Sdcbp2    | SDCBP2   | 1.333420637 | 3.023792265 | 2.423527932 | 1.80393477  | 1.308051232 | 2.037340523 | 1.876743511 | 1.72706131  | 0.392843275 | 3.725460977 |
| ENSMUSG00000082296  | 0.056759758  | 0.727290012  | 0.006084367 | 0.937826184  | 0.999071534 | Gm11450   | Gm11450   |          | 0.701800335 | 0.830060622 | 0.673202203 | 4.440454819 | 0.915635862 | 0.291048646 | 1.29430587  | 1.865226215 | 1.649941757 | 2.091486864 |
| ENSMUSG00000019802  | -0.019176598 | 7.484282242  | 0.006059471 | 0.937953255  | 0.999071534 | Sec63     | Sec63     | SEC63    | 162.6071377 | 233.9585152 | 161.2992479 | 171.235039  | 207.2607177 | 183.8699822 | 215.6960732 | 171.946224  | 129.7168496 | 159.6065913 |
| ENSMUSG00000031818  | -0.023373185 | 9.208897136  | 0.006055325 | 0.937974445  | 0.999071534 | Cox4i1    | Cox4i1    | COX4I1   | 878.5136599 | 576.7142619 | 475.3480758 | 625.13278   | 542.7758587 | 500.9674821 | 976.6184939 | 482.7481773 | 405.5713976 | 467.5780321 |
| ENSMUSG00000022283  | -0.020830655 | 10.78932725  | 0.006051971 | 0.937991589  | 0.999071534 | Pabpc1    | Pabpc1    | PABPC1   | 1508.028561 | 2048.471034 | 1963.259586 | 1799.424933 | 1928.067516 | 2076.923138 | 1203.316167 | 1599.18969  | 1835.128077 | 1697.568385 |
| ENSMUSG00000097246  | -0.065520792 | -0.399725492 | 0.006035224 | 0.938077271  | 0.999071534 | Gm26890   | Gm26890   |          | 0.280720134 | 0.177870133 | 1.211763966 | 1.179495811 | 0.457817931 | 0.654859454 | 0.582437641 | 0.345412262 | 1.099961171 | 0.196076894 |
| ENSMUSG000000044795 | 0.057498592  | 1.827069759  | 0.006011455 | 0.938199082  | 0.999071534 | Cyb5d1    | Cyb5d1    | CYB5D1   | 2.596661241 | 8.952796705 | 0.471241542 | 0.624438959 | 4.90519212  | 9.531843159 | 5.565515239 | 1.657978857 | 0.707117896 | 0.915025503 |
| ENSMUSG000000067017 | 0.033086351  | 6.707846709  | 0.006004764 | 0.9382233419 | 0.999071534 | Gm3608    | Gm3608    |          | 130.8155825 | 158.9566091 | 39.0457278  | 99.91023343 | 108.8952651 | 162.4051445 | 230.9041671 | 50.3611078  | 30.64177549 | 61.56814456 |
| ENSMUSG00000019927  | -0.020179934 | 6.274216876  | 0.005998978 | 0.938263122  | 0.999071534 | Ube2d1    | Ube2d1    | UBE2D1   | 59.09158824 | 53.71678023 | 101.7208529 | 90.68241326 | 97.25360909 | 70.50653452 | 52.28995713 | 83.65884985 | 67.96188666 | 91.82934513 |
| ENSMUSG000000097059 | -0.043129571 | 0.68954308   | 0.005988813 | 0.938315345  | 0.999071534 | Fam120aos | Fam120aos |          | 1.403600671 | 2.312311732 | 1.481044848 | 0.971349492 | 1.63506404  | 1.746291877 | 1.423736457 | 1.934308667 | 0.549980586 | 1.503256184 |
| ENSMUSG000000028863 | 0.021992889  | 4.060656006  | 0.005978529 | 0.938368229  | 0.999071534 | Meaf6     | Meaf6     | MEAF6    | 19.58022936 | 14.40748079 | 19.45554368 | 14.15394974 | 17.92030188 | 25.46675653 | 21.8090539  | 10.36236786 | 9.742513232 | 15.68615148 |
| ENSMUSG000000026726 | -0.041817357 | 0.77388644   | 0.005955239 | 0.938488151  | 0.999071534 | Cubn      | Cubn      | CUBN     | 0.912340436 | 1.48225111  | 2.221567271 | 1.873316877 | 1.765869163 | 2.473913492 | 1.359021163 | 1.381649048 | 0.864255206 | 1.633974113 |
| ENSMUSG000000022052 | -0.017906394 | 6.319031791  | 0.00595401  | 0.938494489  | 0.999071534 | Ppp2r2a   | Ppp2r2a   | PPP2R2A  | 92.70782431 | 102.868227  | 68.46466409 | 55.57506735 | 99.54269875 | 110.5257234 | 90.01897323 | 76.19794499 | 46.74834978 | 68.23475894 |
| ENSMUSG00000079592  | -0.041041915 | 1.442512484  | 0.005952746 | 0.938501004  | 0.999071534 | C1qtnf5   | C1qtnf5   | C1QTNF5  | 4.982782381 | 2.96450222  | 3.500651458 | 1.387642131 | 0.850233301 | 3.056010784 | 3.365195261 | 2.141556024 | 1.885647722 | 1.960768935 |
| ENSMUSG00000075033  | 0.0262007    | 2.982079603  | 0.005940427 | 0.938564542  | 0.999071534 | Nxpe3     | Nxpe3     | NXPE3    | 8.070703857 | 8.656346483 | 7.539864678 | 7.423885401 | 8.306125323 | 10.04117829 | 6.924536402 | 5.319348834 | 5.421237202 | 10.71887018 |
| ENSMUSG00000033159  | 0.018306405  | 5.259166862  | 0.005930855 | 0.938613964  | 0.999071534 | Cnppd1    | Cnppd1    | CNPPD1   | 34.24785637 | 50.04079748 | 32.65030687 | 35.17672802 | 45.1277675  | 38.56394561 | 27.7628609  | 44.28185198 | 26.16336215 | 49.08458234 |
| ENSMUSG000000066441 | -0.018218158 | 4.668048044  | 0.005927807 | 0.938629708  | 0.999071534 | Rdh11     | Rdh11     | RDH11    | 24.14193154 | 28.16277109 | 23.42743668 | 25.67137942 | 30.80460651 | 30.41458352 | 31.7752091  | 24.3861057  | 17.83508471 | 18.2351511  |
| ENSMUSG000000032363 | 0.018851259  | 5.835854509  | 0.005922894 | 0.938655095  | 0.999071534 | Adamt5    | Adamt5    | ADAMT5   | 57.05636727 | 71.91882387 | 55.87578288 | 46.83292192 | 63.11347194 | 61.62955081 | 33.39309144 | 83.03710778 | 45.72695727 | 52.22181264 |
| ENSMUSG000000043929 | -0.023294039 | 3.778100142  | 0.005916362 | 0.938688866  | 0.999071534 | Klhl15    | Klhl15    | KLHL15   | 14.87816711 | 11.50226861 | 16.76273487 | 14.29271395 | 13.53833025 | 10.69603774 | 10.16030108 | 15.61263424 | 14.6923385  | 12.22212636 |
| ENSMUSG000000025915 | 0.038789954  | 3.108235244  | 0.005913063 | 0.938705929  | 0.999071534 | Sgk3      | Sgk3      | SGK3     | 14.52726694 | 7.52983564  | 6.462741153 | 5.966861163 | 9.287163747 | 18.48158903 | 14.8845175  | 4.214029596 | 1.099961171 | 6.143742663 |
| ENSMUSG000000036299 | -0.020592836 | 5.719029828  | 0.005909763 | 0.938723002  | 0.999071534 | BC031181  | BC031181  | C18orf32 | 77.75947716 | 64.21111809 | 38.43984582 | 49.05314933 | 46.04340336 | 66.86842644 | 82.64142977 | 34.33397884 | 30.48463818 | 43.33299347 |
| ENSMUSG000000017309 | 0.043013279  | 1.213364685  | 0.005892121 | 0.938814353  | 0.999071534 | Cd300lg   | Cd300lg   | CD300LG  | 3.36864161  | 2.371601776 | 1.95228639  | 0.901967385 | 2.681505025 | 5.311637791 | 2.394465859 | 1.4507315   | 1.335667137 | 0.849666539 |
| ENSMUSG000000021097 | 0.071510682  | -0.240715422 | 0.005882606 | 0.938863678  | 0.999071534 | Clmn      | Clmn      | CLMN     | 1.19306057  | 1.304380977 | 0.605881983 | 0           | 0.523220493 | 0.9459081   | 0.19414588  | 1.72706131  | 0.078568655 | 0.653589645 |
| ENSMUSG000000028760 | -0.020189549 | 6.459780079  | 0.005870292 | 0.938927572  | 0.999071534 | Elf4g3    | Elf4g3    | EIF4G3   | 72.77669478 | 85.67411417 | 110.8764029 | 86.8663974  | 103.0090345 | 99.32035048 | 40.57648901 | 96.30093864 | 78.09724317 | 105.4893687 |
| ENSMUSG000000030844 | -0.020966817 | 5.521554223  | 0.005866989 | 0.938944723  | 0.999071534 | Rgs10     | Rgs10     | RGS10    | 63.58311039 | 33.67674522 | 46.11435093 | 47.11045035 | 49.24812888 | 51.15179955 | 70.66910048 | 22.93537419 | 29.07040239 | 49.01922338 |
| ENSMUSG000000029474 | -0.016897763 | 4.746739778  | 0.005817455 | 0.939202506  | 0.999071534 | Rnf34     | Rnf34     | RNF34    | 26.10697248 | 31.60159367 | 25.64900395 | 26.64272891 | 29.56195784 | 29.25038893 | 30.22204205 | 22.03730231 | 20.11357571 | 27.2546882  |
| ENSMUSG000000037405 | -0.024760945 | 3.57288172   | 0.005758109 | 0.939512817  | 0.999071534 | Icam1     | Icam1     | ICAM1    | 16.70284798 | 14.94109119 | 7.943786    | 10.5460802  | 11.70705853 | 20.59169171 | 11.45460695 | 7.253657501 | 8.485414751 | 10.39207536 |
| ENSMUSG000000091105 | 0.047885811  | 2.271912072  | 0.005755425 | 0.939526885  | 0.999071534 | Gm5633    | Mrto4-ps2 |          | 8.632144126 | 6.344034752 | 2.962089695 | 2.01208109  | 4.251166504 | 5.529924276 | 13.26663516 | 0.759906976 | 0.785686551 | 3.660102012 |
| ENSMUSG000000074865 | -0.06076094  | 1.224892284  | 0.005743745 | 0.93958816   | 0.999071534 | Zfp934    | Zfp934    |          | 2.17558104  | 3.972432975 | 2.356207712 | 0.069382107 | 3.204725518 | 4.29296753  | 3.429910554 | 2.279720929 | 0           | 1.111102397 |
| ENSMUSG000000030223 | 0.029000571  | 2.61014468   | 0.005742846 | 0.93959288   | 0.999071534 | Ptpro     | Ptpro     | PTPRO    | 7.71980369  | 5.573264174 | 6.462741153 | 5.966861163 | 4.970594681 | 11.05984855 | 6.277383467 | 3.315957715 | 4.242707375 | 5.294076125 |
| ENSMUSG000000020803 | 0.021525524  | 8.132764     | 0.005736518 | 0.939626108  | 0.999071534 | Txndc17   | Txndc17   | TXNDC17  | 309.2132278 | 231.5276234 | 295.131846  | 354.3344181 | 248.3335264 | 195.2936415 | 313.9338887 | 255.2596616 | 263.4407005 | 308.6250304 |
| ENSMUSG000000080268 | -0.016482805 | 5.32128422   | 0.005735497 | 0.939631469  | 0.999071534 | Brms1     | Brms1     | BRMS1    | 44.5643213  | 31.60159367 | 52.84637297 | 36.84189858 | 42.38085991 | 47.87750228 | 41.74136429 | 34.33397884 | 26.63477408 | 43.20227554 |

|                    |              |              |             |             |             |               |          |          |             |             |             |             |             |             |             |             |             |             |
|--------------------|--------------|--------------|-------------|-------------|-------------|---------------|----------|----------|-------------|-------------|-------------|-------------|-------------|-------------|-------------|-------------|-------------|-------------|
| ENSMUSG00000031556 | -0.022603182 | 5.74607904   | 0.005728639 | 0.939667506 | 0.999071534 | Tm2d2         | Tm2d2    | TM2D2    | 68.70625284 | 60.06081498 | 36.21827854 | 53.14669362 | 62.72105657 | 52.24323197 | 103.0914625 | 43.79827482 | 24.51342039 | 37.25460977 |
| ENSMUSG00000030036 | 0.020834775  | 5.741335083  | 0.005697102 | 0.939833489 | 0.999071534 | Mogs          | Mogs     | MOGS     | 72.77669478 | 55.43619152 | 45.37382851 | 56.54641684 | 44.86615725 | 90.66165326 | 73.77543457 | 25.42234248 | 31.42746204 | 48.49635166 |
| ENSMUSG00000027861 | 0.085758259  | -0.270946938 | 0.005686759 | 0.939888024 | 0.999071534 | Casq2         | Casq2    | CASQ2    | 1.684320805 | 0.059290044 | 0           | 1.595788451 | 0.196207685 | 0.436572969 | 0.388291761 | 0           | 1.492804447 | 0.980384468 |
| ENSMUSG00000024725 | 0.019333056  | 7.145500675  | 0.005685158 | 0.939896471 | 0.999071534 | Ostf1         | Ostf1    | OSTF1    | 183.8716879 | 141.2288858 | 124.0038459 | 141.331351  | 139.6998716 | 117.0015557 | 202.1705768 | 140.3064608 | 98.05368156 | 128.1035704 |
| ENSMUSG00000014039 | 0.025677121  | 2.876732543  | 0.005679099 | 0.939928446 | 0.999071534 | Prdm15        | Prdm15   | PRDM15   | 8.491784059 | 5.573264174 | 6.933982695 | 7.076974868 | 9.090956062 | 7.64002696  | 7.053966989 | 7.599069763 | 5.656943167 | 7.189486096 |
| ENSMUSG00000009555 | -0.015322606 | 6.00395908   | 0.005646065 | 0.940103082 | 0.999071534 | Cdk9          | Cdk9     | CDK9     | 76.77695669 | 58.69714396 | 78.69733758 | 57.10147369 | 63.44048475 | 73.85359395 | 65.23301583 | 58.16742492 | 52.56243026 | 58.69235013 |
| ENSMUSG00000071041 | 0.068075596  | 4.264208351  | 0.005645029 | 0.940108569 | 0.999071534 | Gm15210       | Gm15210  |          | 38.66919848 | 33.08384478 | 9.559471289 | 5.203657991 | 11.51085084 | 51.07903739 | 45.6242819  | 0.552659619 | 0           | 7.450921954 |
| ENSMUSG00000082519 | 0.038476822  | 2.08368278   | 0.005643635 | 0.940115951 | 0.999071534 | Vamp7-ps      | Vamp7-ps |          | 6.316203019 | 5.217523908 | 1.95228639  | 2.01208109  | 5.75542542  | 3.856394561 | 8.607134033 | 2.486968286 | 1.571373102 | 3.92153787  |
| ENSMUSG00000032366 | -0.019573823 | 10.06894296  | 0.005630411 | 0.940186018 | 0.999071534 | Tpm1          | Tpm1     | TPM1     | 979.222008  | 924.1539222 | 1281.844316 | 1085.413675 | 1341.798954 | 1217.529249 | 931.3177885 | 1276.781885 | 823.7923487 | 915.0255031 |
| ENSMUSG00000070891 | 0.101516801  | -1.041736454 | 0.005612434 | 0.940281401 | 0.999071534 | Gm12689       | Gm12689  |          | 0.280720134 | 0           | 0.403921322 | 0           | 1.111843547 | 0           | 0           | 0.414494714 | 0.235705965 | 1.045743432 |
| ENSMUSG00000026317 | 0.025432217  | 3.425566041  | 0.005589317 | 0.940404289 | 0.999071534 | Cln8          | Cln8     | CLN8     | 14.94834714 | 12.86593964 | 9.088229746 | 7.978942253 | 10.00659192 | 17.24463228 | 14.62565633 | 7.806317121 | 5.499805857 | 8.431306421 |
| ENSMUSG00000042254 | 0.07275859   | 0.144654884  | 0.005588023 | 0.940411173 | 0.999071534 | Cilp          | Cilp     | CILP     | 1.965040939 | 1.007930755 | 0.336601102 | 0.971349492 | 0.588623054 | 3.056010784 | 1.747312924 | 0           | 0           | 0.522871716 |
| ENSMUSG00000039218 | 0.021292155  | 7.828487234  | 0.005580649 | 0.940450431 | 0.999071534 | Srrm2         | Srrm2    | SRRM2    | 209.1365    | 238.7017188 | 244.3723998 | 227.2957811 | 250.8188237 | 302.3995433 | 103.3503237 | 231.1498857 | 211.9782315 | 258.5600636 |
| ENSMUSG00000051255 | -0.069269524 | 4.118671954  | 0.005573313 | 0.940489512 | 0.999071534 | Gm6563        | Gm6563   | SARNP    | 36.77433758 | 12.03587901 | 12.38692054 | 0.277528426 | 32.11265774 | 27.28581057 | 40.96478077 | 1.657978857 | 0           | 17.1240487  |
| ENSMUSG00000071054 | 0.018097992  | 5.837318459  | 0.005563679 | 0.94054087  | 0.999071534 | Safb          | Safb     | SAFB     | 65.33761123 | 58.93430414 | 64.49277109 | 39.61718284 | 67.49544357 | 104.9957991 | 36.88771728 | 53.88431287 | 40.85570065 | 49.93424888 |
| ENSMUSG00000033577 | 0.018702999  | 5.114747255  | 0.0055267   | 0.940738434 | 0.999071534 | Myo6          | Myo6     | MYO6     | 36.42343741 | 41.20658086 | 26.52416681 | 35.24611013 | 38.71831646 | 29.6869619  | 21.8737692  | 42.34754332 | 32.68456052 | 38.23499424 |
| ENSMUSG00000048249 | -0.025358569 | 4.84403952   | 0.005495744 | 0.940904331 | 0.999071534 | Crebrf        | Crebrf   | CREBRF   | 22.73833087 | 42.51096184 | 27.1300488  | 21.02277828 | 37.01784986 | 13.97033501 | 17.92613629 | 50.22294289 | 24.98483232 | 25.29391926 |
| ENSMUSG00000051022 | 0.073210502  | 0.388848566  | 0.005486713 | 0.940952816 | 0.999071534 | Hs3st1        | Hs3st1   | HS3ST1   | 1.473780704 | 1.422961066 | 2.154247051 | 0           | 0.915635862 | 1.309718907 | 3.882917609 | 0.552659619 | 0.235705965 | 0           |
| ENSMUSG00000036769 | -0.020752619 | 3.693632433  | 0.005473009 | 0.941026468 | 0.999071534 | Wdr44         | Wdr44    | WDR44    | 13.68510654 | 14.76322106 | 10.56927459 | 13.46012867 | 14.51936867 | 16.22596202 | 15.53167044 | 11.05319238 | 8.01400282  | 11.63389568 |
| ENSMUSG00000024251 | 0.02821725   | 3.342621709  | 0.005456299 | 0.941116402 | 0.999071534 | Thada         | Thada    | THADA    | 14.52726694 | 12.27303919 | 6.530061373 | 5.273040098 | 13.40752513 | 20.8099782  | 9.383717555 | 7.668152216 | 4.556981996 | 9.150255031 |
| ENSMUSG00000058420 | -0.031079073 | 2.454539792  | 0.005443843 | 0.941183527 | 0.999071534 | Syt17         | Syt17    | SYT17    | 5.193322482 | 7.351965506 | 3.702612119 | 4.232308499 | 7.717502268 | 5.384399953 | 2.847472913 | 7.668152216 | 2.985608894 | 6.797323309 |
| ENSMUSG00000031657 | 0.025103932  | 5.052422652  | 0.005438767 | 0.941210907 | 0.999071534 | Heatr3        | Heatr3   | HEATR3   | 46.66972231 | 34.15106558 | 30.09213849 | 27.89160683 | 31.91645006 | 79.96561551 | 39.21746785 | 12.36575898 | 16.65655488 | 24.3135348  |
| ENSMUSG00000021748 | 0.017514152  | 6.273523029  | 0.00543688  | 0.941221089 | 0.999071534 | Pdhh          | Pdhh     | PDHB     | 101.5505085 | 75.17977631 | 77.08165229 | 69.59025287 | 75.99777657 | 94.66357214 | 116.2933824 | 58.16742492 | 53.34811681 | 58.10411944 |
| ENSMUSG00000037541 | 0.056364295  | -0.222417424 | 0.0054297   | 0.941259842 | 0.999071534 | Shank2        | Shank2   | SHANK2   | 0.912340436 | 0.652190488 | 0.740522424 | 1.040731598 | 0.327012808 | 0.363810808 | 0.453007054 | 1.72706131  | 0.549980586 | 0.392153787 |
| ENSMUSG00000032350 | 0.018371902  | 4.832603452  | 0.005422043 | 0.941301201 | 0.999071534 | Gclc          | Gclc     | GCLC     | 21.89617047 | 37.76775829 | 28.88037453 | 26.85087523 | 30.93541163 | 32.88849701 | 23.68579741 | 39.37699786 | 20.11357571 | 22.48348379 |
| ENSMUSG00000033327 | -0.035478691 | 3.235460149  | 0.005421748 | 0.941302793 | 0.999071534 | Tnxb          | Tnxb     | TNXB     | 9.193584394 | 16.60121243 | 7.068623136 | 7.215739081 | 8.894748377 | 3.34705943  | 3.947632902 | 18.79042705 | 4.556981996 | 12.74499808 |
| ENSMUSG00000084950 | 0.053970523  | 1.346258397  | 0.005419755 | 0.941313566 | 0.999071534 | Gm5577        | Gm5577   |          | 2.035220973 | 0.118580089 | 2.962089695 | 4.509836926 | 2.550699902 | 1.382481069 | 0.323576467 | 2.210638477 | 4.085570065 | 3.202589261 |
| ENSMUSG00000033658 | -0.023379998 | 3.45864411   | 0.005419235 | 0.941316376 | 0.999071534 | Ddx19b        | Ddx19b   | DDX19B   | 13.12366627 | 13.87387039 | 8.616988204 | 9.921641237 | 11.44544828 | 16.37148634 | 10.16030108 | 11.19135729 | 8.642552061 | 6.53589645  |
| ENSMUSG00000030357 | -0.020672714 | 7.497196158  | 0.005418763 | 0.941318927 | 0.999071534 | Fkbp4         | Fkbp4    | FKBP4    | 210.8208208 | 135.9520718 | 227.8116256 | 155.2077724 | 216.5478814 | 292.5766515 | 225.0797907 | 107.1468837 | 126.1812601 | 140.7832095 |
| ENSMUSG00000029377 | -0.082348669 | -0.516424397 | 0.00541317  | 0.941349165 | 0.999071534 | Ereg          | Ereg     | EREg     | 0           | 0.711480533 | 0.807842644 | 1.387642131 | 0           | 1.164194584 | 0.582437641 | 0.552659619 | 0           | 0.522871716 |
| ENSMUSG00000014503 | 0.051917693  | 0.685742542  | 0.005406871 | 0.941383235 | 0.999071534 | Pkd2l2        | Pkd2l2   | PKD2L2   | 1.965040939 | 1.837991377 | 0.336601102 | 0.416292639 | 3.073920395 | 2.837724299 | 1.553167044 | 1.4507315   | 1.335667137 | 0.261435858 |
| ENSMUSG00000042790 | 0.023916685  | 3.555532796  | 0.005395579 | 0.941444368 | 0.999071534 | Rnf214        | Rnf214   | RNF214   | 10.59718506 | 16.66050248 | 10.23267349 | 8.603381212 | 13.99614818 | 12.6606161  | 6.924536402 | 13.88557293 | 11.94243557 | 10.52279329 |
| ENSMUSG00000004285 | -0.018257101 | 6.617933529  | 0.005393888 | 0.941453525 | 0.999071534 | Atp6v1f       | Atp6v1f  | ATP6V1F  | 93.54998471 | 89.5872571  | 113.7711724 | 114.8273863 | 98.95407569 | 62.64822107 | 111.1808742 | 112.6734799 | 77.15441931 | 99.01883122 |
| ENSMUSG00000031482 | -0.030569257 | 2.622528367  | 0.005381515 | 0.941520592 | 0.999071534 | Slc25a15      | Slc25a15 | SLC25A15 | 7.649623656 | 7.174095373 | 3.635291898 | 5.134275885 | 8.175320199 | 9.604605321 | 9.513148141 | 4.283112048 | 2.828471584 | 3.660102012 |
| ENSMUSG00000022663 | 0.015927572  | 5.22973696   | 0.005363509 | 0.941618336 | 0.999071534 | Atg3          | Atg3     | ATG3     | 31.01957483 | 39.13142931 | 42.61369948 | 42.60061342 | 37.01784986 | 39.21880506 | 39.6704749  | 40.55139956 | 29.93465759 | 31.96053364 |
| ENSMUSG00000024735 | 0.0178979    | 6.728495577  | 0.005361668 | 0.941628338 | 0.999071534 | Prpf19        | Prpf19   | PRPF19   | 109.4106723 | 97.17638278 | 119.2241102 | 94.98410387 | 126.6847618 | 188.5267605 | 108.3981166 | 65.55924732 | 71.10463286 | 99.99921569 |
| ENSMUSG00000037868 | -0.036895275 | 1.452260835  | 0.005354501 | 0.941667292 | 0.999071534 | Egr2          | Egr2     | EGR2     | 2.596661241 | 3.142372354 | 4.779735644 | 1.734552664 | 1.438856355 | 3.565345915 | 1.553167044 | 3.315957715 | 2.121353688 | 1.960768935 |
| ENSMUSG00000078201 | 0.02772149   | 2.921443648  | 0.005341195 | 0.941739687 | 0.999071534 | Tmem203       | Tmem203  | TMEM203  | 7.579443623 | 7.589125684 | 4.779735644 | 11.6561939  | 6.344048475 | 5.675448599 | 6.989251696 | 6.908245239 | 6.992610304 | 9.084896066 |
| ENSMUSG00000078486 | -0.031374684 | 2.89200001   | 0.005337586 | 0.941759339 | 0.999071534 | 2310042D19Rik | Perm1    | PERM1    | 6.73728322  | 7.114805329 | 7.203263577 | 6.938210655 | 10.33360473 | 3.274297269 | 3.753487022 | 10.70778012 | 5.106962581 | 11.17638293 |

|                    |              |              |             |             |             |               |               |          |  |  |             |             |             |             |             |             |             |             |             |             |
|--------------------|--------------|--------------|-------------|-------------|-------------|---------------|---------------|----------|--|--|-------------|-------------|-------------|-------------|-------------|-------------|-------------|-------------|-------------|-------------|
| ENSMUSG00000082806 | 0.038371453  | 1.03961142   | 0.005336419 | 0.941765694 | 0.999071534 | Rpl13-ps1     | Rpl13-ps1     |          |  |  | 2.737021308 | 1.304380977 | 2.558168373 | 1.942698983 | 1.308051232 | 1.164194584 | 1.941458804 | 2.348803381 | 1.728510412 | 2.0261279   |
| ENSMUSG00000063851 | -0.032495262 | 2.119345188  | 0.005334052 | 0.941778589 | 0.999071534 | Rnf183        | Rnf183        | RNF183   |  |  | 4.140621979 | 3.379532531 | 3.164050356 | 5.550568524 | 5.820827982 | 2.764962138 | 3.559341141 | 2.625133191 | 4.556981996 | 6.07838699  |
| ENSMUSG00000040688 | -0.018009858 | 5.386345499  | 0.005301305 | 0.941957262 | 0.999071534 | TbB           | TbB           | TBL3     |  |  | 51.02088438 | 26.44335981 | 54.39473804 | 45.44527979 | 40.09177026 | 61.77507513 | 39.28218314 | 26.94215643 | 32.13457994 | 43.92122415 |
| ENSMUSG00000027423 | 0.020375038  | 7.505071101  | 0.005298726 | 0.94197136  | 0.999071534 | Snx5          | Snx5          | SNX5     |  |  | 228.3658291 | 230.1046623 | 155.3077483 | 161.6603083 | 162.5907681 | 256.7049059 | 273.2926844 | 134.7798646 | 104.339174  | 138.2342099 |
| ENSMUSG00000042349 | 0.021034705  | 4.105625017  | 0.005297165 | 0.941979895 | 0.999071534 | Ikake         | Ikake         | IKBKE    |  |  | 21.9663505  | 16.66050248 | 17.57057751 | 16.929234   | 14.91178404 | 18.26330254 | 9.319002261 | 16.30345876 | 15.32088774 | 23.46386826 |
| ENSMUSG00000057069 | 0.023204169  | 3.80698416   | 0.005282372 | 0.942060822 | 0.999071534 | Ero1b         | Ero1b         | ERO1B    |  |  | 17.19410822 | 17.90559341 | 9.424830848 | 11.86434022 | 15.30419941 | 20.30064306 | 12.9430587  | 18.92859196 | 6.206923753 | 11.11102397 |
| ENSMUSG00000000673 | -0.050273222 | 0.4802638    | 0.005277682 | 0.942086504 | 0.999071534 | Haa0          | Haa0          | HAAO     |  |  | 1.263240604 | 2.134441599 | 1.279084186 | 1.387642131 | 0.588623054 | 0.800383777 | 0.19414588  | 2.486968286 | 1.335667137 | 0.980384468 |
| ENSMUSG00000097287 | -0.04103576  | 0.899390664  | 0.005272829 | 0.942111309 | 0.999071534 | D130017N08Rik | D130017N08Rik |          |  |  | 1.263240604 | 1.600831199 | 2.894769475 | 1.457024238 | 1.896674286 | 1.236956746 | 1.100159989 | 1.174401691 | 1.257098482 | 3.398666154 |
| ENSMUSG00000021635 | -0.018871112 | 4.291061665  | 0.005263775 | 0.942162722 | 0.999071534 | Rad17         | Rad17         | RAD17    |  |  | 17.40464832 | 21.16654585 | 14.54116759 | 24.42250151 | 23.80653242 | 26.48542679 | 21.74433861 | 14.78364481 | 13.43524002 | 18.56194592 |
| ENSMUSG00000022545 | 0.02631669   | 3.422160807  | 0.005245703 | 0.942261919 | 0.999071534 | Erc4          | Erc4          | ERCC4    |  |  | 16.42212785 | 11.68013875 | 11.78103856 | 4.162926393 | 10.98763035 | 18.40882687 | 9.513148141 | 9.049801264 | 5.971217787 | 10.58815225 |
| ENSMUSG00000039704 | 0.040690202  | 2.842532488  | 0.005223629 | 0.942383318 | 0.999071534 | Lmbrd2        | Lmbrd2        | LMBRD2   |  |  | 9.755024662 | 18.43920381 | 1.750325729 | 1.526406344 | 5.035997243 | 11.56918368 | 10.16030108 | 4.697606763 | 4.714119306 | 4.379050622 |
| ENSMUSG00000015839 | -0.015622275 | 6.30887984   | 0.005219035 | 0.942408612 | 0.999071534 | Nfe2l2        | Nfe2l2        | NFE2L2   |  |  | 77.26821693 | 96.16845203 | 59.10715346 | 92.55573014 | 87.37782229 | 92.40794513 | 80.95883214 | 74.40180123 | 54.44807798 | 81.7640646  |
| ENSMUSG00000042331 | 0.016815827  | 6.116419639  | 0.00521586  | 0.942426103 | 0.999071534 | Specc1        | Specc1        | SPECC1   |  |  | 72.98723488 | 89.23151683 | 68.19538321 | 47.87365352 | 81.16457894 | 104.4137018 | 79.72924157 | 67.14814373 | 41.40568124 | 53.00612021 |
| ENSMUSG00000022048 | -0.021646231 | 6.269134499  | 0.005211113 | 0.942452263 | 0.999071534 | Dpysl2        | Dpysl2        | DPYSL2   |  |  | 54.45970603 | 57.51134307 | 98.22020148 | 96.02483546 | 94.50670151 | 78.72865877 | 31.83992439 | 82.69169552 | 80.1400282  | 89.6724993  |
| ENSMUSG00000090104 | 0.024024898  | 4.32007565   | 0.00519762  | 0.942526685 | 0.999071534 | Gm16241       | Gm16241       | Slmapos2 |  |  | 13.75528657 | 30.41579278 | 20.93658853 | 15.33344555 | 21.9752607  | 15.42557824 | 12.29590576 | 34.6793911  | 11.86386692 | 21.69917622 |
| ENSMUSG00000085917 | 0.114289541  | 3.519445704  | 0.005194629 | 0.942543196 | 0.999071534 | Gm15899       | Gm15899       |          |  |  | 21.82599043 | 26.97697021 | 0           | 0           | 8.763943254 | 32.67021052 | 30.8044797  | 0           | 0           | 0           |
| ENSMUSG00000038482 | 0.027281092  | 5.917064532  | 0.005186868 | 0.94258606  | 0.999071534 | Tfdp1         | Tfdp1         | TFDP1    |  |  | 89.5497228  | 69.72509222 | 41.06533441 | 41.14358918 | 71.02718189 | 135.0465718 | 93.2547379  | 30.46536151 | 15.24231909 | 42.74476279 |
| ENSMUSG00000038957 | -0.019673067 | 3.905427411  | 0.005169484 | 0.94268219  | 0.999071534 | Edc3          | Edc3          | EDC3     |  |  | 12.91312617 | 18.97281421 | 14.00260583 | 15.12529923 | 16.61225065 | 21.24655116 | 12.10175988 | 15.88896405 | 9.506807267 | 13.9868184  |
| ENSMUSG00000036381 | -0.028473079 | 2.365635293  | 0.005168784 | 0.94268606  | 0.999071534 | P2ry14        | P2ry14        | P2RY14   |  |  | 3.158101509 | 6.581194929 | 6.058819831 | 4.440454819 | 6.082438228 | 6.257545891 | 3.753487022 | 5.112101477 | 5.028393926 | 3.790819941 |
| ENSMUSG00000025261 | -0.018064703 | 7.332708045  | 0.005166116 | 0.94270083  | 0.999071534 | Huwe1         | Huwe1         | HUWE1    |  |  | 149.6940115 | 196.7243673 | 164.5306185 | 139.2498878 | 193.4607772 | 215.1577116 | 103.5444696 | 175.8839238 | 117.3030021 | 170.9790511 |
| ENSMUSG00000025024 | 0.014984591  | 5.642871251  | 0.00514152  | 0.942837158 | 0.999071534 | Smndc1        | Smndc1        | SMNDC1   |  |  | 45.89774194 | 43.04457224 | 60.38623765 | 51.8978157  | 55.78838504 | 49.98760497 | 48.40703952 | 56.64761096 | 38.81291562 | 45.0560823  |
| ENSMUSG00000021756 | 0.017330672  | 6.574052148  | 0.005127472 | 0.94291517  | 0.999071534 | Il6st         | Il6st         | IL6ST    |  |  | 98.32222699 | 132.5725393 | 76.47577031 | 79.23436568 | 106.21376   | 150.0355771 | 103.3503237 | 86.97480756 | 70.47608362 | 62.22173421 |
| ENSMUSG00000010660 | -0.02278413  | 4.612988095  | 0.005106197 | 0.94303352  | 0.999071534 | Plcd1         | Plcd1         | PLCD1    |  |  | 18.31698875 | 21.93731643 | 27.93789144 | 29.20986686 | 29.49655528 | 20.44616739 | 13.52549634 | 40.20598729 | 12.88525944 | 29.47689299 |
| ENSMUSG00000041193 | -0.068903883 | -0.196117192 | 0.005085429 | 0.943149292 | 0.999071534 | Pla2g5        | Pla2g5        | PLA2G5   |  |  | 1.333420637 | 1.126510844 | 0           | 1.040731598 | 0.39241537  | 0.654859454 | 0.970729402 | 1.519813953 | 0           | 0.392153787 |
| ENSMUSG00000027184 | -0.018339902 | 7.875793076  | 0.005085255 | 0.943150264 | 0.999071534 | Caprin1       | Caprin1       | CAPRIN1  |  |  | 234.5416721 | 324.375833  | 215.7613062 | 202.8732795 | 252.3230826 | 359.1540293 | 232.3279036 | 201.8589259 | 166.0941369 | 193.8546887 |
| ENSMUSG00000068749 | -0.022276652 | 8.103750286  | 0.005063308 | 0.943272866 | 0.999071534 | Psma5         | Psma5         | PSMA5    |  |  | 471.3291053 | 225.1835887 | 254.5377531 | 274.5449956 | 214.7166097 | 285.8825326 | 432.6864522 | 172.9133783 | 180.2364948 | 259.2790122 |
| ENSMUSG00000032017 | 0.060920805  | -0.415831042 | 0.00506016  | 0.943290473 | 0.999071534 | Grik4         | Grik4         | GRIK4    |  |  | 0.350900168 | 0.059290044 | 1.279084186 | 1.040731598 | 0.39241537  | 0.291048646 | 0.517722348 | 0.828989429 | 0.785686551 | 0.522871716 |
| ENSMUSG00000022354 | 0.021499256  | 7.725811709  | 0.005057228 | 0.943306878 | 0.999071534 | Ndufb9        | Ndufb9        | NDUFB9   |  |  | 316.5821313 | 202.4162116 | 166.3482645 | 223.5491473 | 181.6229136 | 167.2802093 | 349.5273001 | 152.1195602 | 146.3734044 | 212.0244809 |
| ENSMUSG00000028409 | -0.015476428 | 6.532557219  | 0.005049784 | 0.943348547 | 0.999071534 | Smu1          | Smu1          | SMU1     |  |  | 95.30448555 | 94.98265114 | 106.635229  | 90.68241326 | 94.89911688 | 108.0518099 | 122.5707658 | 76.3361099  | 62.4620808  | 79.99937255 |
| ENSMUSG00000097462 | -0.042421194 | 1.438349725  | 0.005049349 | 0.943350982 | 0.999071534 | 9530026P05Rik | 9530026P05Rik |          |  |  | 2.245761073 | 3.557402664 | 2.423527932 | 3.260959008 | 2.027479409 | 0.582097292 | 1.164875283 | 6.010173358 | 1.885647722 | 2.156845829 |
| ENSMUSG00000086013 | -0.061911026 | -0.393756323 | 0.005043055 | 0.943386237 | 0.999071534 | Gm15706       | Gm15706       |          |  |  | 1.543960738 | 0.177870133 | 0.538561763 | 0.555056852 | 0.588623054 | 0.072762162 | 0.323576467 | 0.483577167 | 1.178529826 | 0.71894861  |
| ENSMUSG00000021938 | -0.01855045  | 4.572217961  | 0.005025812 | 0.943482948 | 0.999071534 | Pspc1         | Pspc1         | PSPC1    |  |  | 27.93165335 | 24.24962816 | 24.30259954 | 22.13289199 | 25.17998621 | 26.55818896 | 34.16967496 | 13.67832557 | 19.32788915 | 20.32663796 |
| ENSMUSG00000020744 | -0.023929761 | 3.205000871  | 0.005022082 | 0.943503885 | 0.999071534 | Slc25a19      | Slc25a19      | SLC25A19 |  |  | 10.17610486 | 5.573264174 | 13.73332495 | 8.603381212 | 9.483371431 | 11.86023233 | 8.73656462  | 8.151729382 | 7.071178959 | 8.169870563 |
| ENSMUSG00000028334 | 0.015508528  | 6.480630331  | 0.005020654 | 0.943511909 | 0.999071534 | Nans          | Nans          | NANS     |  |  | 99.7960077  | 80.93091062 | 97.21039817 | 79.85880464 | 103.5976576 | 111.6171558 | 106.7155189 | 67.07906127 | 77.46869393 | 72.48309164 |
| ENSMUSG00000095690 | -0.112843746 | 0.674903881  | 0.005004744 | 0.943601332 | 0.999071534 | Rab11b-ps2    | Rab11b-ps2    |          |  |  | 1.263240604 | 6.581194929 | 0           | 0           | 0           | 4.656778337 | 2.912188207 | 0           | 0           | 0           |
| ENSMUSG00000042390 | -0.020015577 | 6.013062733  | 0.005002139 | 0.943615987 | 0.999071534 | Gatad2b       | Gatad2b       | GATAD2B  |  |  | 45.6170218  | 79.50794955 | 82.93851146 | 65.77423701 | 62.3286412  | 67.66881022 | 31.32220204 | 96.09369128 | 56.1765884  | 55.03224811 |
| ENSMUSG00000029038 | 0.018592938  | 6.326637912  | 0.004991113 | 0.943678058 | 0.999071534 | Ssu72         | Ssu72         | SSU72    |  |  | 110.4633728 | 76.72131746 | 70.34963026 | 79.58127621 | 76.71720475 | 92.62623162 | 130.6601775 | 48.97945875 | 45.72695727 | 78.88827016 |
| ENSMUSG00000028385 | -0.016511386 | 5.041374658  | 0.004970687 | 0.943793234 | 0.999071534 | Snx30         | Snx30         | SNX30    |  |  | 27.44039311 | 37.6491782  | 32.17906532 | 36.0093133  | 37.67187548 | 33.83440511 | 23.55636683 | 40.62048201 | 29.07040239 | 29.15009817 |
| ENSMUSG00000031958 | 0.034111349  | 1.759693569  | 0.004966682 | 0.943815846 | 0.999071534 | Ldhd          | Ldhd          | LDHD     |  |  | 4.421342113 | 4.446753331 | 2.760129034 | 2.567137942 | 2.550699902 | 1.8918162   | 2.265035272 | 5.388431287 | 3.142746204 | 2.745076509 |

|                    |              |              |             |             |             |               |               |              |             |             |             |             |             |             |             |             |             |             |
|--------------------|--------------|--------------|-------------|-------------|-------------|---------------|---------------|--------------|-------------|-------------|-------------|-------------|-------------|-------------|-------------|-------------|-------------|-------------|
| ENSMUSG00000059866 | -0.023026478 | 3.789490397  | 0.004959567 | 0.943856035 | 0.999071534 | Tnip2         | Tnip2         | TNIP2        | 21.47509026 | 18.67636399 | 12.18495988 | 7.215739081 | 12.75349951 | 18.99092416 | 11.45460695 | 15.68171669 | 7.071178959 | 14.05217737 |
| ENSMUSG00000079033 | -0.067062624 | 0.078193974  | 0.004936037 | 0.943989156 | 0.999071534 | Mef2b         | Mef2b         | MEF2B        | 0.561440268 | 0.830060622 | 0.673202203 | 1.526406344 | 1.308051232 | 0.145524323 | 0.129430587 | 0           | 1.414235792 | 2.418281687 |
| ENSMUSG00000068551 | -0.030675916 | 1.796553956  | 0.004932935 | 0.944006733 | 0.999071534 | Zfp467        | Zfp467        | ZNF467       | 4.56170218  | 3.379532531 | 3.567971678 | 2.497755836 | 3.597140888 | 4.511254014 | 4.530070544 | 2.694215643 | 2.278490998 | 2.222204793 |
| ENSMUSG00000071654 | -0.018987987 | 4.873414249  | 0.004924198 | 0.944056259 | 0.999071534 | Al462493      | Uqcc3         | UQCC3        | 29.61597415 | 20.27719519 | 36.4202392  | 36.98066279 | 28.38471173 | 19.79130793 | 25.10953387 | 29.70545453 | 26.79191139 | 35.55527669 |
| ENSMUSG00000034297 | -0.017078702 | 5.481652396  | 0.004918109 | 0.944090802 | 0.999071534 | Med13         | Med13         | MED13        | 36.77433758 | 59.23075436 | 45.91239027 | 41.07420708 | 49.9021545  | 55.44476708 | 31.7752091  | 62.93411413 | 30.95605011 | 34.64025119 |
| ENSMUSG00000023224 | 0.031494686  | 4.089452768  | 0.004904569 | 0.944167689 | 0.999071534 | Serping1      | Serping1      | SERPING1     | 24.42265167 | 15.3561215  | 26.99540836 | 5.342422204 | 15.43500454 | 29.32315109 | 33.7166679  | 6.977327692 | 5.735511822 | 11.17638293 |
| ENSMUSG00000021557 | 0.014966671  | 4.853910083  | 0.004893795 | 0.944228946 | 0.999071534 | Agtpbp1       | Agtpbp1       | AGTPBP1      | 27.93165335 | 33.79532531 | 28.81305431 | 29.14048475 | 28.90793223 | 32.88849701 | 26.53327033 | 28.18564058 | 22.31349805 | 30.39191849 |
| ENSMUSG00000002833 | 0.016473333  | 5.769471357  | 0.004893324 | 0.944231627 | 0.999071534 | Hdgfrp2       | Hdgfrp2       | CTB-50L17.10 | 54.17898589 | 44.70469348 | 61.19408029 | 58.55849793 | 61.87082327 | 77.20065338 | 30.93391028 | 47.45964479 | 45.25554534 | 66.60078483 |
| ENSMUSG00000066000 | 0.046044736  | 0.506694337  | 0.004880045 | 0.944307224 | 0.999071534 | 2610305D13Rik | 2610305D13Rik |              | 0.912340436 | 0.5336104   | 2.154247051 | 1.387642131 | 1.569661478 | 1.091432423 | 2.718042326 | 1.243484143 | 0.864255206 | 0.392153787 |
| ENSMUSG00000027306 | -0.020353984 | 5.219632598  | 0.004871236 | 0.944357432 | 0.999071534 | Nusap1        | Nusap1        | NUSAP1       | 47.65224277 | 20.6922255  | 43.96010388 | 38.36830492 | 43.49270346 | 59.15563732 | 47.50102541 | 18.03052007 | 30.0917949  | 27.51612406 |
| ENSMUSG00000029752 | -0.017795706 | 5.376752615  | 0.004861482 | 0.94441308  | 0.999071534 | Asns          | Asns          | ASNS         | 44.5643213  | 44.23037313 | 55.20258068 | 30.1183424  | 43.03488553 | 75.52712366 | 45.23599014 | 26.25133191 | 29.07040239 | 30.06512367 |
| ENSMUSG00000034235 | -0.021539436 | 3.853392424  | 0.004851595 | 0.944469538 | 0.999071534 | Usp54         | Usp54         | USP54        | 11.64988557 | 18.49849386 | 13.73332495 | 15.47220976 | 15.43500454 | 15.78938905 | 8.73656462  | 21.41556024 | 9.035395336 | 14.05217737 |
| ENSMUSG00000032122 | 0.035561463  | 4.358793829  | 0.004837151 | 0.944552129 | 0.999071534 | Slc37a2       | Slc37a2       | SLC37A2      | 44.70468137 | 25.4947191  | 12.92548231 | 6.521918016 | 16.3506404  | 27.28581057 | 50.80150538 | 13.26383086 | 5.342668547 | 7.189486096 |
| ENSMUSG00000083364 | 0.047153389  | 4.491819844  | 0.004809224 | 0.944712165 | 0.999071534 | Llph-ps2      | Llph-ps2      |              | 26.17715251 | 24.01246798 | 18.64770103 | 13.66827499 | 32.63587824 | 27.35857273 | 53.00182536 | 22.03730231 | 0           | 12.74499808 |
| ENSMUSG00000020671 | -0.017815425 | 7.323855948  | 0.0048029   | 0.944748472 | 0.999071534 | Rab10         | Rab10         | RAB10        | 135.4474647 | 151.6046435 | 201.0181779 | 159.0931703 | 188.5555851 | 187.5808524 | 100.8911425 | 151.8432304 | 153.4454834 | 170.9136922 |
| ENSMUSG00000062083 | -0.04120805  | 0.780848996  | 0.004785307 | 0.944849593 | 0.999071534 | Rpl13a-ps1    | Rpl13a-ps1    | RPL13A       | 2.105401006 | 2.134441599 | 1.817645949 | 0.693821065 | 1.63506404  | 0.9459081   | 2.847472913 | 1.243484143 | 0.549980586 | 1.960768935 |
| ENSMUSG00000039715 | 0.020525929  | 3.824198364  | 0.004766833 | 0.944955984 | 0.999071534 | Wdr34         | Wdr34         | WDR34        | 20.21184966 | 12.21374915 | 14.60848781 | 13.87642131 | 11.44544828 | 12.58785394 | 13.9137881  | 10.91502748 | 11.62816095 | 18.75802281 |
| ENSMUSG00000084291 | -0.053838898 | 1.053790447  | 0.004756444 | 0.945015902 | 0.999071534 | Gm6654        | Gm6654        |              | 0.421080201 | 2.371601776 | 0           | 4.301690606 | 3.008517833 | 1.236956746 | 3.17104938  | 1.312566595 | 1.099961171 | 2.352922722 |
| ENSMUSG00000087528 | -0.053969087 | 0.215823273  | 0.004739908 | 0.945111416 | 0.999071534 | 9830144P21Rik | 9830144P21Rik |              | 1.263240604 | 1.007930755 | 0.673202203 | 0.971349492 | 1.504258917 | 2.037340523 | 0.711868228 | 2.003391119 | 0           | 0.392153787 |
| ENSMUSG00000038268 | -0.018600969 | 4.434132922  | 0.004736007 | 0.945133971 | 0.999071534 | Ovca2         | Ovca2         | OVCA2        | 25.33499211 | 19.56571465 | 31.57318334 | 14.43147816 | 21.77905301 | 26.12161599 | 20.77360921 | 15.68171669 | 22.70634132 | 17.25476663 |
| ENSMUSG00000021715 | 0.019529578  | 4.514881231  | 0.00473594  | 0.945134361 | 0.999071534 | Cwc27         | Cwc27         | CWC27        | 18.38716879 | 21.7594463  | 31.50586312 | 19.28822562 | 26.35723232 | 26.77647544 | 12.03704459 | 30.25811415 | 19.32788915 | 21.96061207 |
| ENSMUSG00000057103 | 0.042383581  | 0.703049745  | 0.004735409 | 0.94513743  | 0.999071534 | Cml1          | Nat8f1        | NAT8         | 2.245761073 | 1.897281421 | 1.413724627 | 0.693821065 | 1.438856355 | 0.654859454 | 2.006174098 | 1.381649048 | 0.549980586 | 2.679717545 |
| ENSMUSG00000024791 | 0.029426982  | 3.751780106  | 0.004720237 | 0.945225249 | 0.999071534 | Cdca5         | Cdca5         | CDCA5        | 24.77355184 | 7.766995817 | 12.5888812  | 9.921641237 | 13.93074562 | 26.99476192 | 22.8444986  | 5.043019025 | 6.678335683 | 7.189486096 |
| ENSMUSG00000073485 | -0.066521844 | -0.275378268 | 0.004715095 | 0.945255045 | 0.999071534 | Gm16067       | H3f3aos       |              | 1.052700503 | 0.177870133 | 1.88496617  | 0           | 0.654025616 | 0.363810808 | 0.129430587 | 1.036236786 | 1.178529826 | 0.392153787 |
| ENSMUSG00000050241 | -0.043656313 | 0.670638926  | 0.00470281  | 0.945326299 | 0.999071534 | Klre1         | Klre1         |              | 1.684320805 | 2.608761954 | 1.077123525 | 1.526406344 | 0.784830739 | 0.873145938 | 0.841298815 | 0.552659619 | 1.885647722 | 2.548999616 |
| ENSMUSG00000068606 | 0.032673544  | 2.212760559  | 0.004691921 | 0.945389531 | 0.999071534 | Gm4841        | Gm4841        |              | 7.509263589 | 4.091013064 | 3.096730136 | 4.787365352 | 3.662543449 | 3.419821592 | 1.423736457 | 5.526596192 | 5.106962581 | 5.882306805 |
| ENSMUSG00000078901 | 0.056454539  | 0.742468883  | 0.004679921 | 0.945459305 | 0.999071534 | Gm14440       | Gm14440       |              | 0           | 1.422961066 | 0.336601102 | 2.983430582 | 3.008517833 | 2.328389169 | 2.200319978 | 0.345412262 | 1.728510412 | 1.045743432 |
| ENSMUSG00000063457 | 0.018536137  | 10.58375705  | 0.004670639 | 0.945513333 | 0.999071534 | Rps15         | Rps15         | RPS15        | 1943.706209 | 1448.100045 | 1488.786673 | 1509.338346 | 1532.512823 | 1192.717352 | 2013.875218 | 1395.603703 | 1192.35791  | 1597.895964 |
| ENSMUSG00000048897 | -0.016672614 | 4.909149455  | 0.004667991 | 0.945528755 | 0.999071534 | Zfp710        | Zfp710        | ZNF710       | 29.89669429 | 25.37613901 | 33.52546973 | 30.38936267 | 37.01784986 | 41.61995639 | 17.66727512 | 25.42234248 | 26.32049946 | 33.85594361 |
| ENSMUSG00000048307 | -0.014682013 | 5.024782182  | 0.004667562 | 0.945531253 | 0.999071534 | Ankrd46       | Ankrd46       | ANKRD46      | 28.63345369 | 41.08800077 | 33.25618885 | 29.14048475 | 37.34486267 | 41.91100504 | 32.68122321 | 32.26150527 | 22.86347863 | 28.1697137  |
| ENSMUSG00000092444 | 0.063551244  | -0.214063522 | 0.004663589 | 0.945554409 | 0.999071534 | Gm18733       | Gm18733       |              | 0.912340436 | 1.126510844 | 0.673202203 | 0           | 0.981038424 | 2.037340523 | 0.711868228 | 0.552659619 | 0           | 0.588230681 |
| ENSMUSG00000025465 | -0.020425541 | 6.111295784  | 0.004659141 | 0.945580337 | 0.999071534 | Echs1         | Echs1         | ECHS1        | 101.4101485 | 69.48793205 | 47.39343512 | 72.15739081 | 70.89637677 | 67.59604805 | 131.1778999 | 47.7359746  | 37.08440521 | 51.89501782 |
| ENSMUSG00000081559 | -0.037888449 | 3.990027435  | 0.004655691 | 0.945600456 | 0.999071534 | Gm12411       | Gm12411       |              | 16.56248792 | 8.834216617 | 22.14835249 | 14.77838869 | 20.6018069  | 7.421740475 | 5.112508185 | 24.10977589 | 1.571373102 | 37.45068666 |
| ENSMUSG00000028402 | -0.016029237 | 5.246724181  | 0.004624353 | 0.945783568 | 0.999071534 | Mpdz          | Mpdz          | MPDZ         | 32.0020953  | 32.8466846  | 46.9895138  | 39.13150809 | 46.30501361 | 49.62379416 | 25.43311034 | 32.67599998 | 37.55581714 | 36.40494323 |
| ENSMUSG00000047562 | 0.036563354  | 8.665358779  | 0.004619995 | 0.945809082 | 0.999071534 | Mmp10         | Mmp10         | MMP10        | 167.2390199 | 1054.29557  | 323.3390183 | 171.1656569 | 382.21257   | 119.4027071 | 224.5620684 | 966.6016739 | 211.1139762 | 411.7614764 |
| ENSMUSG00000098134 | -0.022939751 | 3.009161764  | 0.004598621 | 0.94593439  | 0.999071534 | Rnf113a2      | Rnf113a2      | RNF113B      | 8.91286426  | 7.589125684 | 6.597381593 | 8.880909638 | 9.41796887  | 7.64002696  | 6.536244641 | 6.977327692 | 8.406846095 | 7.777716776 |
| ENSMUSG00000042870 | 0.018700223  | 4.550672612  | 0.00458671  | 0.946004347 | 0.999071534 | Tom1          | Tom1          | TOM1         | 20.21184966 | 30.77153305 | 26.38952637 | 17.62305506 | 25.57240158 | 26.99476192 | 12.74891282 | 28.25472303 | 17.20653547 | 28.56186749 |
| ENSMUSG00000042210 | 0.018693456  | 3.971908177  | 0.004568393 | 0.946112103 | 0.999071534 | Abhd14a       | Abhd14a       | ABHD14A      | 16.42212785 | 12.27303919 | 17.16665619 | 18.17811192 | 15.95822503 | 14.62519447 | 18.05556688 | 14.3691501  | 14.77090716 | 12.94107497 |
| ENSMUSG00000081550 | 0.040445459  | 0.529078028  | 0.004545439 | 0.946247451 | 0.999071534 | Gm15877       | Gm15877       |              | 1.824680872 | 1.600831199 | 0.471241542 | 1.80393477  | 0.981038424 | 1.309718907 | 1.812028217 | 1.105319238 | 1.178529826 | 0.980384468 |

|                    |              |              |             |             |             |            |            |          |             |              |             |             |             |             |             |             |             |             |
|--------------------|--------------|--------------|-------------|-------------|-------------|------------|------------|----------|-------------|--------------|-------------|-------------|-------------|-------------|-------------|-------------|-------------|-------------|
| ENSMUSG00000027366 | 0.015144392  | 7.001552158  | 0.004517529 | 0.946412482 | 0.999071534 | Sppl2a     | Sppl2a     | SPPL2A   | 122.2536184 | 145.9720893  | 124.8790087 | 120.0310443 | 148.8562302 | 141.013069  | 155.899142  | 118.2691585 | 93.81097419 | 115.946803  |
| ENSMUSG00000047749 | 0.023010697  | 2.944934832  | 0.00451533  | 0.946425503 | 0.999071534 | Zc3hav1l   | Zc3hav1l   | ZC3HAV1L | 6.526743119 | 7.411255551  | 8.549667983 | 8.117706466 | 8.306125323 | 11.13261071 | 6.471529348 | 6.63191543  | 4.399844685 | 9.150255031 |
| ENSMUSG00000028657 | -0.021966385 | 5.937198422  | 0.004501239 | 0.946509042 | 0.999071534 | Ppt1       | Ppt1       | PPT1     | 91.51476374 | 82.17600155  | 36.95880097 | 45.02898715 | 66.44900258 | 88.04221544 | 110.2748601 | 33.02141224 | 29.54181432 | 42.61404486 |
| ENSMUSG00000037784 | 0.030032783  | 2.159437019  | 0.004477715 | 0.946648789 | 0.999071534 | Dzip1l     | Dzip1l     | DZIP1L   | 2.38612114  | 3.260952442  | 6.866662475 | 4.995511672 | 4.643581873 | 5.020589145 | 2.070889391 | 5.733843549 | 3.928432755 | 4.13691657  |
| ENSMUSG00000021112 | 0.016091448  | 5.34412488   | 0.004453423 | 0.946793486 | 0.999071534 | Mpp5       | Mpp5       | MPP5     | 29.47561409 | 50.81156806  | 43.21958146 | 38.02139439 | 47.54766228 | 38.63670777 | 38.76446079 | 53.67706551 | 34.17736497 | 29.60761092 |
| ENSMUSG00000021061 | 0.04820828   | -0.003488533 | 0.00445248  | 0.946799114 | 0.999071534 | Sptb       | Sptb       | SPTB     | 1.965040939 | 0.948640711  | 0.605881983 | 0.277528426 | 0.654025616 | 1.8918162   | 0.517722348 | 0.621742072 | 0.549980586 | 0.849666539 |
| ENSMUSG00000078915 | 0.08207365   | -0.661717184 | 0.004415994 | 0.947017218 | 0.999071534 | Hsp25-ps1  | Hsp25-ps1  |          | 1.824680872 | 0.355740266  | 0           | 0           | 0.457817931 | 0.582097292 | 0           | 0.483577167 | 1.178529826 | 0.130717929 |
| ENSMUSG00000050312 | -0.028716728 | 2.089050086  | 0.004414464 | 0.947026386 | 0.999071534 | Nsun3      | Nsun3      | NSUN3    | 6.526743119 | 4.565333419  | 2.01960661  | 4.717983245 | 3.793348573 | 4.001918884 | 4.853647011 | 3.246875263 | 3.8498641   | 3.594743048 |
| ENSMUSG00000081485 | -0.045871666 | 5.588348238  | 0.004390946 | 0.947167472 | 0.999071534 | Gm12338    | Gm12338    |          | 73.26795502 | 41.32516095  | 43.42154212 | 42.53123131 | 53.43389282 | 47.6592158  | 92.60758497 | 54.02247777 | 0           | 42.87548072 |
| ENSMUSG00000066979 | -0.016966267 | 6.952901766  | 0.004377204 | 0.947250089 | 0.999071534 | Bub3       | Bub3       | BUB3     | 149.4132914 | 90.00228741  | 139.016255  | 140.5681479 | 125.9653336 | 180.3773984 | 150.5924879 | 73.08923463 | 85.16482213 | 119.3454692 |
| ENSMUSG00000020642 | -0.035535297 | 1.746446562  | 0.004374696 | 0.947265183 | 0.999071534 | Rnf144a    | Rnf144a    | RNF144A  | 4.140621979 | 6.284744707  | 1.683005509 | 1.734552664 | 3.204725518 | 4.656778337 | 3.17104938  | 5.250266382 | 1.492804447 | 1.176461361 |
| ENSMUSG00000031133 | 0.025780174  | 3.049387343  | 0.004363244 | 0.947334149 | 0.999071534 | Arhgef6    | Arhgef6    | ARHGEF6  | 11.64988557 | 10.67220799  | 6.597381593 | 5.82809695  | 7.39048946  | 17.46291877 | 6.989251696 | 3.937699786 | 5.814080477 | 7.385562989 |
| ENSMUSG00000074884 | -0.017820782 | 8.21818867   | 0.004356772 | 0.947373172 | 0.999071534 | Serf2      | Serf2      | SERF2    | 308.4412474 | 260.1647149  | 330.273001  | 363.7703846 | 285.9399993 | 235.167306  | 289.6009383 | 327.9344015 | 249.7697546 | 306.3374666 |
| ENSMUSG00000009772 | 0.022327801  | 3.415301434  | 0.004346461 | 0.947435392 | 0.999071534 | Nuak2      | Nuak2      | NUAK2    | 12.7727661  | 12.62877946  | 10.23267349 | 8.256470679 | 10.59521498 | 22.19245926 | 8.73656462  | 7.737234668 | 6.678335683 | 8.431306421 |
| ENSMUSG00000026180 | -0.021792707 | 4.068737111  | 0.004341436 | 0.947465741 | 0.999071534 | Cxcr2      | Cxcr2      | CXCR2    | 29.05453389 | 19.15068434  | 14.8777687  | 13.25198235 | 11.11843547 | 12.51509178 | 26.85684679 | 13.88557293 | 12.88525944 | 12.94107497 |
| ENSMUSG00000058838 | -0.087068371 | -0.651648784 | 0.004338684 | 0.947482369 | 0.999071534 | Rps27a-ps2 | Rps27a-ps2 |          | 0           | 1.956571465  | 0.269280881 | 0           | 0.39241537  | 1.746291877 | 0.453007054 | 0           | 0           | 0.392153787 |
| ENSMUSG00000021062 | 0.022440624  | 3.439110917  | 0.004336873 | 0.947493314 | 0.999071534 | Rab15      | Rab15      | RAB15    | 12.70258607 | 14.64464097  | 10.09803305 | 6.175007483 | 11.96866877 | 18.77263767 | 11.38989165 | 9.947873145 | 7.306884924 | 6.405178521 |
| ENSMUSG00000073664 | 0.017713724  | 4.872630635  | 0.004331739 | 0.947524362 | 0.999071534 | Nbeal1     | Nbeal1     | NBEAL1   | 21.68563036 | 30.712243    | 31.50586312 | 28.51604579 | 38.06429085 | 25.46675653 | 24.7859574  | 44.76542915 | 23.88487115 | 21.04558657 |
| ENSMUSG00000062279 | -0.054398352 | -0.028611758 | 0.004314893 | 0.94762635  | 0.999071534 | Gm10237    | Gm10237    |          | 1.473780704 | 1.363671021  | 1.211763966 | 0           | 0.457817931 | 0.654859454 | 1.359021163 | 0.967154334 | 0.31427462  | 0.71894861  |
| ENSMUSG00000051650 | -0.066066904 | 2.407542535  | 0.004314859 | 0.947626554 | 0.999071534 | B3gnt2     | B3gnt2     | B3GNT2   | 14.38690688 | 10.79078808  | 0.403921322 | 0.901967385 | 1.373453794 | 6.766881022 | 15.79053161 | 3.039627905 | 0           | 0.130717929 |
| ENSMUSG00000031075 | -0.017746891 | 4.367798724  | 0.004312059 | 0.947643528 | 0.999071534 | Ano1       | Ano1       | ANO1     | 22.45761073 | 24.60536843  | 22.21567271 | 21.1615425  | 16.61225065 | 38.78223209 | 18.57328923 | 14.64547991 | 13.04239675 | 17.51620249 |
| ENSMUSG00000021108 | -0.029692564 | 2.973903289  | 0.004310715 | 0.947651678 | 0.999071534 | Prkch      | Prkch      | PRKCH    | 14.94834714 | 11.50226861  | 5.049016526 | 3.607869541 | 5.820827982 | 13.02442691 | 11.84289871 | 5.043019025 | 3.142746204 | 5.555511983 |
| ENSMUSG00000024131 | -0.065314922 | -0.138053401 | 0.004308983 | 0.94766218  | 0.999071534 | Slc3a1     | Slc3a1     | SLC3A1   | 0           | 0            | 1.279084186 | 1.318260024 | 1.504258917 | 0.363810808 | 0.453007054 | 0.690824524 | 0.864255206 | 1.176461361 |
| ENSMUSG00000013495 | -0.017763844 | 3.834094671  | 0.004307421 | 0.947671651 | 0.999071534 | Tmem175    | Tmem175    | TMEM175  | 15.79050755 | 14.11103057  | 14.54116759 | 13.94580342 | 15.43500454 | 12.95166475 | 12.29590576 | 14.57639746 | 12.88525944 | 14.31361323 |
| ENSMUSG00000032498 | -0.024650982 | 3.469946171  | 0.004266489 | 0.947920516 | 0.999071534 | Mlh1       | Mlh1       | MLH1     | 14.59744698 | 9.308536972  | 9.76143195  | 13.7376571  | 9.744981678 | 19.93683226 | 11.58403753 | 3.385040167 | 7.85686551  | 11.63389568 |
| ENSMUSG00000075318 | 0.051295567  | -0.173188109 | 0.004248918 | 0.948027718 | 0.999071534 | Scn2a1     | Scn2a1     | SCN2A    | 0.350900168 | 0.592900444  | 1.144443746 | 1.387642131 | 0.327012808 | 1.018670261 | 0.970729402 | 0.552659619 | 1.021392516 | 0.130717929 |
| ENSMUSG00000093514 | 0.068920278  | -0.655294384 | 0.004236638 | 0.948102768 | 0.999071534 | Gm9320     | Gm28727    |          | 1.333420637 | 0.118580089  | 0.740522424 | 0           | 0.39241537  | 0.363810808 | 0.129430587 | 0.069082452 | 0.392843275 | 1.503256184 |
| ENSMUSG00000031609 | 0.018001234  | 5.57229898   | 0.004235424 | 0.948110194 | 0.999071534 | Sap30      | Sap30      | SAP30    | 35.79181711 | 60.59442538  | 51.16336746 | 50.02449882 | 46.69742898 | 29.17762677 | 37.92316198 | 74.19455387 | 36.61299328 | 47.97347995 |
| ENSMUSG00000001891 | 0.015573983  | 6.498188256  | 0.004226293 | 0.948166079 | 0.999071534 | Ugp2       | Ugp2       | UGP2     | 91.44458371 | 122.0782014  | 75.8025681  | 88.11527532 | 89.01288633 | 87.7511668  | 125.029947  | 98.02799995 | 55.62660781 | 74.37850161 |
| ENSMUSG00000054517 | 0.022928462  | 3.190945866  | 0.004223749 | 0.948181662 | 0.999071534 | Trim65     | Trim65     | TRIM65   | 9.053224327 | 8.300606217  | 9.963392611 | 8.950291745 | 10.07199449 | 14.40690798 | 8.218842272 | 4.006782239 | 9.349669957 | 8.365947457 |
| ENSMUSG00000054733 | -0.02092628  | 3.213520085  | 0.004222094 | 0.948191804 | 0.999071534 | MsrA       | MsrA       | MSRA     | 10.6673651  | 10.13859759  | 9.357510628 | 8.672763319 | 9.0255535   | 11.27813504 | 12.42533635 | 6.562832977 | 6.756904338 | 7.320204025 |
| ENSMUSG00000030604 | -0.020197397 | 3.612680256  | 0.004213675 | 0.948243408 | 0.999071534 | Zfp626     | Zfp626     | ZNF780B  | 11.01826527 | 12.21374915  | 13.53136429 | 15.40282765 | 10.7260201  | 12.15128097 | 11.26046107 | 12.02034672 | 13.67094599 | 7.843075741 |
| ENSMUSG00000072940 | -0.016469498 | 7.919368948  | 0.004205461 | 0.948293811 | 0.999071534 | Gm10443    | Gm10443    |          | 248.0864186 | 227.0808701  | 277.1573471 | 273.5736461 | 234.0103654 | 229.273571  | 241.7763364 | 250.1475601 | 161.6157235 | 281.1742653 |
| ENSMUSG00000089803 | 0.114872931  | 3.327372798  | 0.004187318 | 0.94840531  | 0.999071534 | Gm10171    | Gm10171    |          | 34.9496567  | 15.41541155  | 0           | 0           | 0           | 26.12161599 | 28.92773619 | 0           | 0           | 0           |
| ENSMUSG00000029250 | -0.016903985 | 5.690527472  | 0.004181922 | 0.948438518 | 0.999071534 | Polr2b     | Polr2b     | POLR2B   | 64.42527079 | 68.771716147 | 41.53657595 | 43.91887345 | 51.40641341 | 92.8445181  | 63.29155702 | 30.46536151 | 30.56320683 | 40.65327592 |
| ENSMUSG00000019845 | 0.022555672  | 3.169995694  | 0.004175599 | 0.948477458 | 0.999071534 | Tube1      | Tube1      | TUBE1    | 11.7200656  | 6.699775018  | 8.549667983 | 8.603381212 | 10.20279961 | 11.86023233 | 9.577863435 | 10.50053276 | 3.535589479 | 8.888819173 |
| ENSMUSG00000067719 | 0.017687037  | 6.76174841   | 0.004175097 | 0.948480552 | 0.999071534 | Gm10221    | Gm10221    |          | 169.3444209 | 85.37766395  | 89.60321327 | 117.8108169 | 97.12280397 | 96.77367482 | 167.6126101 | 106.1797293 | 68.27616128 | 89.41106344 |
| ENSMUSG00000022241 | -0.015340888 | 6.967274323  | 0.004159056 | 0.948579474 | 0.999071534 | Tars       | Tars       | TARS     | 139.6582667 | 115.7934567  | 153.2881417 | 122.5981823 | 120.8639338 | 186.1983713 | 116.8111047 | 79.3757378  | 99.07507408 | 130.5218521 |
| ENSMUSG00000030603 | -0.015189433 | 6.879887838  | 0.004155969 | 0.94859854  | 0.999071534 | Psmc4      | Psmc4      | PSMC4    | 136.5703453 | 88.75719648  | 134.1018789 | 133.1442625 | 120.0791031 | 143.7780312 | 139.3967422 | 83.17527268 | 89.48969816 | 115.1624955 |

|                     |              |              |             |             |             |               |               |            |             |             |             |             |             |             |             |             |             |             |
|---------------------|--------------|--------------|-------------|-------------|-------------|---------------|---------------|------------|-------------|-------------|-------------|-------------|-------------|-------------|-------------|-------------|-------------|-------------|
| ENSMUSG00000039781  | -0.024054848 | 3.443797048  | 0.004146599 | 0.948656433 | 0.999071534 | Azi1          | Cep131        | CEP131     | 7.228543455 | 10.07930755 | 11.98299922 | 11.23990126 | 15.69661478 | 11.86023233 | 4.077063489 | 9.671543335 | 12.88525944 | 12.02604947 |
| ENSMUSG000000041774 | -0.037637238 | 1.280220628  | 0.00414027  | 0.948695576 | 0.999071534 | Ydjc          | Ydjc          | YDJC       | 4.491522147 | 1.837991377 | 2.625488593 | 1.595788451 | 1.569661478 | 2.910486461 | 2.135604685 | 0.759906976 | 0.707117896 | 4.771204409 |
| ENSMUSG000000028478 | -0.019645189 | 7.42029156   | 0.004139299 | 0.948701589 | 0.999071534 | Cita          | Cita          | CLTA       | 240.0157147 | 217.4758829 | 116.0600599 | 152.0855776 | 172.5319575 | 212.611036  | 286.2357431 | 115.7821902 | 85.63983406 | 142.0903888 |
| ENSMUSG000000036158 | -0.037424738 | 1.750548226  | 0.004135904 | 0.948722599 | 0.999071534 | Prickle1      | Prickle1      | PRICKLE1   | 4.35116208  | 6.166164618 | 3.298690797 | 0.763203172 | 2.550699902 | 5.311637791 | 5.630230533 | 2.072473572 | 0.628549241 | 2.548999616 |
| ENSMUSG000000020091 | -0.048472782 | 3.389740469  | 0.004133988 | 0.948734461 | 0.999071534 | Elf4ebp2      | Elf4ebp2      | EIF4EBP2   | 16.91338808 | 23.24169741 | 3.096730136 | 3.330341114 | 8.698540692 | 32.37916188 | 16.95540689 | 4.075864691 | 0.235705965 | 1.633974113 |
| ENSMUSG000000017760 | -0.017526559 | 8.001767431  | 0.004129366 | 0.948763091 | 0.999071534 | Ctsa          | Ctsa          | CTSA       | 241.9105756 | 336.2931319 | 213.7416996 | 236.4542191 | 312.9512572 | 229.5646196 | 233.6222095 | 344.5832725 | 172.6153353 | 245.7497065 |
| ENSMUSG000000033703 | -0.023396322 | 2.974699408  | 0.00411865  | 0.948829525 | 0.999071534 | Fuk           | Fuk           | FUK        | 9.684844629 | 4.921073686 | 8.347707322 | 10.47669809 | 6.801866406 | 10.04117829 | 5.436084652 | 7.599069763 | 7.6997282   | 6.209101628 |
| ENSMUSG000000052544 | 0.043623006  | 0.449608016  | 0.004109808 | 0.948884406 | 0.999071534 | St6galnac3    | St6galnac3    | ST6GALNAC3 | 1.543960738 | 1.778701332 | 1.279084186 | 0.901967385 | 0.850233301 | 0.727621615 | 1.359021163 | 0.27632981  | 2.435628308 | 0.915025503 |
| ENSMUSG000000027427 | 0.017600457  | 0.414642629  | 0.004087137 | 0.949025391 | 0.999071534 | Polr3f        | Polr3f        | POLR3F     | 11.9306057  | 14.52606088 | 16.5607742  | 20.39833933 | 18.9013403  | 17.24463228 | 13.9137881  | 18.30684988 | 13.43524002 | 14.77112598 |
| ENSMUSG000000020864 | -0.012969789 | 6.003958037  | 0.004086983 | 0.94902635  | 0.999071534 | Ankrd40       | Ankrd40       | ANKRD40    | 64.07437062 | 62.25454663 | 72.70583797 | 58.2809695  | 77.24042524 | 82.80333981 | 55.46100651 | 66.18098939 | 44.70556475 | 62.87532385 |
| ENSMUSG000000010392 | 0.015486422  | 5.087118129  | 0.004085237 | 0.949037226 | 0.999071534 | Gosr1         | Gosr1         | GOSR1      | 28.56327365 | 40.37652024 | 31.775144   | 27.96098894 | 46.76283154 | 40.31023748 | 21.61490802 | 38.54800844 | 30.95605011 | 32.54876432 |
| ENSMUSG000000092558 | -0.015475553 | 4.599197592  | 0.004080906 | 0.949064207 | 0.999071534 | Med20         | Med20         | MED20      | 26.31751258 | 27.98490096 | 21.94639183 | 20.60648565 | 29.43115272 | 33.32506998 | 28.66887501 | 22.03730231 | 14.53520119 | 19.86912521 |
| ENSMUSG000000032036 | -0.025006665 | 2.929253148  | 0.004065393 | 0.949160981 | 0.999071534 | Kirrel3       | Kirrel3       | KIRREL3    | 6.316203019 | 4.921073686 | 8.213066882 | 8.395234892 | 11.31464316 | 8.513172898 | 4.335924663 | 11.39860464 | 4.16413872  | 7.777176776 |
| ENSMUSG000000021286 | -0.017439979 | 3.996300497  | 0.004063563 | 0.949172411 | 0.999071534 | Zfyve21       | Zfyve21       | ZFYVE21    | 17.19410822 | 16.30476221 | 15.2143698  | 15.95788451 | 18.051107   | 14.98900527 | 21.67962332 | 16.16529386 | 10.13535651 | 13.26786979 |
| ENSMUSG000000057554 | 0.013244675  | 6.005700793  | 0.004033647 | 0.949359598 | 0.999071534 | Lgal8         | Lgal8         | LGAL8      | 72.49597465 | 75.95054689 | 49.00912041 | 62.79080643 | 71.68120751 | 72.8492368  | 64.58586289 | 68.59887523 | 46.04123189 | 60.97991388 |
| ENSMUSG000000032020 | -0.02086452  | 3.234053138  | 0.004030856 | 0.949377103 | 0.999071534 | Ubash3b       | Ubash3b       | UBASH3B    | 11.79024564 | 7.826285862 | 10.29999371 | 9.991023343 | 8.567735569 | 15.28005392 | 8.154126978 | 8.911636359 | 5.028393926 | 8.627383315 |
| ENSMUSG000000017491 | 0.048034361  | 0.07114367   | 0.00401854  | 0.949454393 | 0.999071534 | Rarb          | Rarb          | RARB       | 1.263240604 | 0.415030311 | 0.807842644 | 1.179495811 | 0.981038424 | 1.382481069 | 1.035444696 | 0.967154334 | 0           | 1.30717929  |
| ENSMUSG000000026187 | -0.015212525 | 4.835493688  | 0.004000596 | 0.949567218 | 0.999071534 | Xrcc5         | Xrcc5         | XRCC5      | 26.94913288 | 27.03626025 | 30.89998114 | 26.22643628 | 37.54107036 | 40.45576181 | 27.89229149 | 27.97839322 | 13.67094599 | 30.58799539 |
| ENSMUSG000000022434 | 0.013998597  | 5.126776195  | 0.003999908 | 0.949571553 | 0.999071534 | Fam118a       | Fam118a       | FAM118A    | 31.86173523 | 42.39238175 | 36.55487965 | 34.06661432 | 34.92496789 | 36.89041589 | 41.48250312 | 39.44608032 | 22.3920667  | 29.86904678 |
| ENSMUSG000000027509 | -0.01403449  | 5.525356738  | 0.003998504 | 0.949580387 | 0.999071534 | Rae1          | Rae1          | RAE1       | 50.95070435 | 46.83913508 | 50.89408658 | 43.91887345 | 47.22064947 | 60.75640487 | 57.40246532 | 36.95911203 | 23.64916518 | 47.71204409 |
| ENSMUSG000000001964 | -0.018084407 | 6.214843589  | 0.003996362 | 0.949593879 | 0.999071534 | Emd           | Emd           | EMD        | 88.9181025  | 102.868227  | 47.73003622 | 60.63996112 | 89.27449658 | 88.62431273 | 124.1239329 | 60.79255811 | 35.82730672 | 54.96688915 |
| ENSMUSG000000064081 | -0.060534665 | -0.725218573 | 0.003994342 | 0.949606605 | 0.999071534 | Gm8973        | Gm8973        |            | 0.070180034 | 0.415030311 | 1.346404407 | 0.555056852 | 0.130805123 | 0.218286485 | 0.323576467 | 0.345412262 | 1.021392516 | 0.196076894 |
| ENSMUSG000000084771 | -0.052789386 | -0.143178672 | 0.003991999 | 0.949621364 | 0.999071534 | A230072E10Rik | A230072E10Rik |            | 0.98252047  | 0.118580089 | 0.942483085 | 1.734552664 | 0.261610246 | 0.509335131 | 0.323576467 | 0.414494714 | 0.785686551 | 1.568615148 |
| ENSMUSG000000069020 | -0.018357112 | 4.771482069  | 0.003991517 | 0.949624399 | 0.999071534 | Urm1          | Urm1          | URM1       | 40.21315922 | 29.70431225 | 21.81175139 | 24.83879414 | 25.89941439 | 38.2001348  | 44.20054545 | 19.27400422 | 14.45663254 | 18.16979213 |
| ENSMUSG000000046603 | 0.025242444  | 2.367335544  | 0.003982931 | 0.949678542 | 0.999071534 | Tcaim         | Tcaim         | TCAIM      | 4.912602348 | 4.921073686 | 4.375814322 | 4.717983245 | 6.998074091 | 4.875064822 | 5.565515239 | 5.250266382 | 2.121353688 | 6.993409202 |
| ENSMUSG000000074994 | -0.015500248 | 4.968679457  | 0.003968879 | 0.949767271 | 0.999071534 | Qser1         | Qser1         | QSER1      | 26.66841275 | 37.17485784 | 29.75553739 | 29.07110264 | 40.3533805  | 44.02110772 | 24.52709623 | 39.44608032 | 23.25632191 | 20.58807382 |
| ENSMUSG000000003868 | -0.014473163 | 5.803203444  | 0.003964848 | 0.949792753 | 0.999071534 | Ruvbl2        | Ruvbl2        | RUVLB2     | 61.12680921 | 54.6061309  | 62.13656338 | 48.01241773 | 65.59876928 | 87.1690695  | 71.96340635 | 43.03836784 | 34.33450228 | 39.4114556  |
| ENSMUSG000000026856 | 0.022870998  | 3.030813313  | 0.003895966 | 0.950230223 | 0.999071534 | Dolpp1        | Dolpp1        | DOLPP1     | 8.211063924 | 6.46261484  | 10.09803305 | 7.63203172  | 9.0255535   | 13.97033501 | 10.35444696 | 4.283112048 | 4.399844685 | 7.712357812 |
| ENSMUSG000000016510 | -0.01912113  | 3.68691985   | 0.003893489 | 0.950246021 | 0.999071534 | Mtif3         | Mtif3         | MTIF3      | 15.29924731 | 13.63671021 | 11.10783636 | 12.97445392 | 13.66913537 | 12.00575665 | 17.08483748 | 13.47107822 | 5.578374512 | 13.79074151 |
| ENSMUSG000000056167 | 0.015275807  | 5.13017415   | 0.003892789 | 0.950250489 | 0.999071534 | Cnot10        | Cnot10        | CNOT10     | 52.28412499 | 34.26964567 | 31.23658224 | 31.84638691 | 31.0008142  | 57.40934544 | 34.55796672 | 22.72812684 | 27.34189197 | 31.63373882 |
| ENSMUSG000000005883 | 0.049074531  | -0.063389277 | 0.003891905 | 0.950256131 | 0.999071534 | Spo11         | Spo11         | SPO11      | 2.105401006 | 0.5336104   | 0.538561763 | 0.346910533 | 0.719428178 | 0.291048646 | 1.48845175  | 0.690824524 | 0.235705965 | 1.30717929  |
| ENSMUSG000000096959 | -0.046522211 | 0.13284463   | 0.003888473 | 0.950278043 | 0.999071534 | 4930509G22Rik | 4930509G22Rik |            | 0.140360067 | 0.711480533 | 1.144443746 | 2.01208109  | 0.981038424 | 1.236956746 | 0.388291761 | 1.381649048 | 0.471411931 | 1.176461361 |
| ENSMUSG000000092118 | 0.023868802  | 2.434075382  | 0.003887784 | 0.95028244  | 0.999071534 | Fancf         | Fancf         | FANCF      | 6.386383052 | 4.624623464 | 5.722218729 | 4.648601139 | 5.820827982 | 6.475832375 | 7.701119924 | 4.973936572 | 3.299883514 | 3.594743048 |
| ENSMUSG000000074506 | 0.08148935   | 2.321022227  | 0.003879675 | 0.95033425  | 0.999071534 | Gm10705       | Gm10705       |            | 7.298723488 | 11.73942879 | 0           | 0           | 5.886230544 | 8.513172898 | 15.66110102 | 0           | 0           | 1.699333077 |
| ENSMUSG000000036845 | 0.018816087  | 3.825423665  | 0.003878923 | 0.950339057 | 0.999071534 | Lin37         | Lin37         | LIN37      | 11.79024564 | 14.88180115 | 19.11894258 | 13.32136446 | 13.21131744 | 10.11394045 | 11.97232929 | 17.20153065 | 12.17814154 | 15.55543355 |
| ENSMUSG000000041236 | -0.014151522 | 5.490906767  | 0.003822942 | 0.950698255 | 0.999071534 | Vps41         | Vps41         | VPS41      | 46.31882214 | 57.03702272 | 39.3823289  | 32.74835429 | 59.84334386 | 59.66497245 | 41.15892665 | 48.56496403 | 25.45624425 | 45.22840344 |
| ENSMUSG000000014418 | -0.015976558 | 4.80809561   | 0.003821757 | 0.950705892 | 0.999071534 | Hps5          | Hps5          | HP55       | 32.4231755  | 36.40408727 | 20.1960661  | 23.65929833 | 33.48611154 | 27.28581057 | 20.32060215 | 36.95911203 | 18.93504588 | 30.39191849 |
| ENSMUSG000000048416 | -0.043506964 | 0.715821606  | 0.003814158 | 0.95075486  | 0.999071534 | Mlf1          | Mlf1          | MLF1       | 1.122880537 | 0.592900444 | 0.471241542 | 3.81601586  | 1.831271725 | 2.546675653 | 1.48845175  | 0.690824524 | 2.042785033 | 0.457512752 |
| ENSMUSG000000084230 | -0.089661007 | 1.901821027  | 0.003807002 | 0.950801015 | 0.999071534 | Gm14388       | Gm14388       |            | 9.263764428 | 7.114805329 | 0           | 0           | 3.204725518 | 9.09527019  | 9.513148141 | 0           | 0           | 0           |

|                    |              |              |             |             |             |         |         |               |             |             |             |             |             |             |             |             |             |             |
|--------------------|--------------|--------------|-------------|-------------|-------------|---------|---------|---------------|-------------|-------------|-------------|-------------|-------------|-------------|-------------|-------------|-------------|-------------|
| ENSMUSG00000015994 | 0.015613434  | 6.376442827  | 0.003785964 | 0.950936972 | 0.999071534 | Fnta    | Fnta    | FNTA          | 122.7448787 | 77.66995817 | 61.66532183 | 89.08662481 | 77.37123037 | 95.53671808 | 121.2117447 | 56.85485832 | 52.24815564 | 82.94052596 |
| ENSMUSG00000040511 | 0.017677574  | 5.790333217  | 0.003765245 | 0.951071237 | 0.999071534 | Pvr     | Pvr     |               | 47.37152264 | 98.89579407 | 44.22938476 | 44.5433124  | 50.68698524 | 63.81241566 | 60.24993823 | 82.20811835 | 31.19175607 | 34.05202051 |
| ENSMUSG00000014301 | -0.019656364 | 4.256826557  | 0.003745693 | 0.951139765 | 0.999071534 | Pam16   | Pam16   | PAM16         | 21.61545033 | 11.50226861 | 22.01371205 | 23.38176991 | 20.34019666 | 13.02442691 | 12.16647517 | 25.07693022 | 20.97783091 | 16.79725388 |
| ENSMUSG00000042293 | -0.037817267 | 1.235819437  | 0.003752641 | 0.951153096 | 0.999071534 | Gm5617  | Gm5617  | C11orf71      | 4.912602348 | 1.304380977 | 2.221567271 | 2.01208109  | 1.308051232 | 1.746291877 | 3.947632902 | 1.174401691 | 2.907040239 | 0.522871716 |
| ENSMUSG00000017478 | -0.015400136 | 5.214150999  | 0.003745599 | 0.951198894 | 0.999071534 | Zc3h18  | Zc3h18  | ZC3H18        | 41.68693992 | 40.8508406  | 35.47775612 | 26.29581838 | 49.96755706 | 69.92443722 | 28.15115266 | 31.29435093 | 24.59198905 | 30.71871332 |
| ENSMUSG00000004698 | 0.023855439  | 4.038456559  | 0.003742603 | 0.951218391 | 0.999071534 | Hdac9   | Hdac9   | HDAC9         | 7.228543455 | 18.67636399 | 20.06142566 | 20.88401407 | 16.48144552 | 10.76879991 | 8.607134033 | 31.50159829 | 11.5495923  | 15.49007459 |
| ENSMUSG00000015971 | -0.012825339 | 5.084280349  | 0.003741175 | 0.951227689 | 0.999071534 | Actr8   | Actr8   | ACTR8         | 33.19515587 | 34.62538593 | 35.747037   | 34.41352485 | 38.19509597 | 36.59936725 | 32.35764674 | 27.49481605 | 27.65616659 | 38.49643009 |
| ENSMUSG00000025823 | -0.015702729 | 7.445081467  | 0.003736187 | 0.951260174 | 0.999071534 | Pdia4   | Pdia4   | PDIA4         | 178.3976453 | 209.590307  | 162.1744108 | 164.0192999 | 196.2730873 | 219.1596305 | 243.005927  | 157.3698266 | 104.5748799 | 128.2996473 |
| ENSMUSG00000037400 | -0.01447995  | 5.964419942  | 0.003732143 | 0.951286523 | 0.999071534 | Atp11b  | Atp11b  | ATP11B        | 59.51266844 | 88.81648652 | 67.38754056 | 44.4739303  | 66.31819746 | 58.71906435 | 60.96180646 | 82.00087099 | 45.56981996 | 51.04535128 |
| ENSMUSG00000015337 | 0.021966767  | 2.940329539  | 0.003728089 | 0.951312953 | 0.999071534 | Endog   | Endog   | ENDOG         | 8.842684226 | 6.344034752 | 8.818948865 | 8.950291745 | 5.75542542  | 6.475832375 | 10.61330813 | 6.217420715 | 6.364061063 | 6.731973344 |
| ENSMUSG00000032567 | -0.023917696 | 2.665358262  | 0.003717629 | 0.951381221 | 0.999071534 | Aste1   | Aste1   | ASTE1         | 7.789983723 | 4.150303108 | 8.078426441 | 8.187088573 | 4.120361381 | 8.949745867 | 6.665675228 | 5.526596192 | 3.064177549 | 6.405178521 |
| ENSMUSG00000048108 | -0.016922626 | 4.470686598  | 0.003705689 | 0.951459261 | 0.999071534 | Tmem72  | Tmem72  | TMEM72        | 28.77381375 | 24.84252861 | 24.03331866 | 12.83568971 | 25.50699902 | 25.9033295  | 23.16807507 | 24.10977589 | 9.585375922 | 25.35927823 |
| ENSMUSG00000037885 | -0.014561442 | 4.4921958    | 0.003701155 | 0.951488929 | 0.999071534 | Stk35   | Stk35   | STK35         | 23.08923104 | 27.86632087 | 21.54247051 | 18.45564034 | 26.16102464 | 31.5787781  | 16.76126101 | 20.79381817 | 18.5422026  | 21.11094554 |
| ENSMUSG00000040220 | 0.016714636  | 4.418094775  | 0.003693597 | 0.951538423 | 0.999071534 | Gas8    | Gas8    | GA58          | 17.96608859 | 20.27719519 | 25.24508263 | 19.91266458 | 26.29182976 | 19.93683226 | 11.97232929 | 25.00784777 | 19.64216377 | 25.29391926 |
| ENSMUSG00000027676 | -0.052041192 | 0.44030084   | 0.003692026 | 0.951548716 | 0.999071534 | Ccdc39  | Ccdc39  | CCDC39        | 1.403600671 | 0.355740266 | 2.423527932 | 0           | 2.354492217 | 1.018670261 | 0.388291761 | 1.105319238 | 0.392843275 | 2.941153403 |
| ENSMUSG00000020262 | 0.014642239  | 6.941103963  | 0.003685271 | 0.951593011 | 0.999071534 | Adarb1  | Adarb1  | ADARB1        | 126.6749605 | 117.1571277 | 128.4469804 | 122.5981823 | 139.2420536 | 128.9345502 | 80.11753333 | 110.3937589 | 124.609887  | 144.7047474 |
| ENSMUSG00000023953 | -0.028698383 | 3.229874094  | 0.003666876 | 0.951713821 | 0.999071534 | Polh    | Polh    | POLH          | 10.456825   | 14.46677084 | 5.789538949 | 5.134275885 | 13.08051232 | 19.71854577 | 15.01394809 | 4.352194501 | 2.121353688 | 6.274460592 |
| ENSMUSG00000018401 | -0.012797635 | 6.28607929   | 0.003659788 | 0.95176046  | 0.999071534 | Mtmr4   | Mtmr4   | MTMR4         | 78.32091743 | 72.27456413 | 76.61041075 | 77.2916667  | 102.2242038 | 109.1432423 | 64.00342525 | 70.74043125 | 65.52625835 | 69.28050238 |
| ENSMUSG00000021003 | -0.017709637 | 4.327582072  | 0.003652816 | 0.95180637  | 0.999071534 | Galc    | Galc    | GALC          | 26.38769261 | 22.64879696 | 13.39672385 | 18.52502245 | 23.61032474 | 29.61419974 | 28.47472913 | 12.36575898 | 14.37806388 | 13.13715187 |
| ENSMUSG00000008167 | -0.018051407 | 3.780809352  | 0.003648678 | 0.951833641 | 0.999071534 | Fbxw9   | Fbxw9   | FBXW9         | 20.70310989 | 15.41541155 | 14.13724627 | 7.562649614 | 13.86534306 | 14.84348095 | 14.30207986 | 12.02034672 | 9.978219197 | 14.50969012 |
| ENSMUSG00000035161 | -0.015311003 | 4.26355492   | 0.003642108 | 0.951876973 | 0.999071534 | Ints6   | Ints6   | INTS6         | 18.59770889 | 23.12311732 | 15.41633046 | 18.0393477  | 24.59136316 | 24.30256195 | 17.60255983 | 21.48464269 | 14.06378926 | 15.0979208  |
| ENSMUSG00000022408 | -0.058822217 | -0.000829248 | 0.003632925 | 0.951937607 | 0.999071534 | Fam83f  | Fam83f  | FAM83F        | 1.614140771 | 1.126510844 | 0.740522424 | 0           | 1.111843547 | 2.764962138 | 0.970729402 | 0.207247357 | 0           | 0.588230681 |
| ENSMUSG00000024982 | 0.013929098  | 5.308460321  | 0.003632552 | 0.951940076 | 0.999071534 | Zdhc6   | Zdhc6   | ZDHHC6        | 46.81008237 | 40.13936006 | 38.37252559 | 31.84638691 | 47.80927253 | 51.58837252 | 53.77840888 | 29.56728962 | 22.47063536 | 38.69250699 |
| ENSMUSG00000025369 | -0.016066389 | 6.681523913  | 0.003619535 | 0.952026154 | 0.999071534 | Smarcc2 | Smarcc2 | SMARCC2       | 86.67234142 | 98.0064434  | 113.973133  | 85.61751948 | 152.7803839 | 107.6879991 | 53.71369359 | 129.8750105 | 85.40412809 | 113.0056496 |
| ENSMUSG00000042476 | 0.047063333  | 0.534229976  | 0.003606403 | 0.952113159 | 0.999071534 | Abcb4   | Abcb4   | ABCB4         | 2.526481208 | 1.067220799 | 1.077123525 | 0.971349492 | 1.111843547 | 0.9459081   | 3.947632902 | 0.345412262 | 1.099961171 | 0.065358965 |
| ENSMUSG00000037846 | 0.031852864  | 1.90433224   | 0.003597233 | 0.952174003 | 0.999071534 | Rtkn2   | Rtkn2   | RTKN2         | 3.859901845 | 1.067220799 | 3.433331237 | 5.689332737 | 4.381971627 | 3.419821592 | 3.429910554 | 1.4507315   | 5.656943167 | 3.071871332 |
| ENSMUSG00000024074 | -0.016078721 | 4.919302632  | 0.003585841 | 0.952249699 | 0.999071534 | Crim1   | Crim1   | CRIM1         | 19.65040939 | 38.12349855 | 38.97840758 | 26.29581838 | 34.27094228 | 38.49118345 | 19.67344922 | 35.09388582 | 29.46324566 | 21.56845829 |
| ENSMUSG00000005882 | -0.015129308 | 4.612473143  | 0.003579073 | 0.952294734 | 0.999071534 | Uqcc1   | Uqcc1   | UQCC1         | 29.89669429 | 25.90974941 | 19.72482456 | 23.45115201 | 28.31930917 | 29.83248622 | 33.32837614 | 20.79381817 | 13.1209654  | 22.22204793 |
| ENSMUSG00000031546 | 0.018477255  | 5.210705382  | 0.003576965 | 0.952308768 | 0.999071534 | Gins4   | Gins4   | GIN54         | 53.54736559 | 30.83082309 | 28.67841387 | 38.92336177 | 38.58751134 | 56.02686437 | 62.96798056 | 21.20831288 | 15.00661312 | 31.56837986 |
| ENSMUSG00000027404 | -0.022534397 | 7.555414087  | 0.003574078 | 0.952327992 | 0.999071534 | Snrb    | Snrb    | SNRPB         | 316.4417712 | 166.5457347 | 159.8182031 | 147.2982122 | 199.2162026 | 343.4374024 | 321.505578  | 91.11975471 | 58.92649132 | 140.1296199 |
| ENSMUSG00000023186 | 0.013793674  | 5.906251251  | 0.003560377 | 0.952419345 | 0.999071534 | Vwa5a   | Vwa5a   | VWASA         | 49.05584345 | 67.70923071 | 57.49146817 | 71.53295185 | 62.26323864 | 67.59604805 | 41.87079488 | 77.9250063  | 52.24815564 | 49.54209509 |
| ENSMUSG00000090659 | -0.040062864 | 0.101390869  | 0.003545891 | 0.952516126 | 0.999071534 | Zfp493  | Zfp493  |               | 1.684320805 | 1.007930755 | 0.403921322 | 0.693821065 | 1.177246109 | 0.800383777 | 1.359021163 | 0.828989429 | 0.392843275 | 1.111102397 |
| ENSMUSG00000057577 | -0.037201045 | 1.049925793  | 0.003544948 | 0.952522432 | 0.999071534 | Gm10025 | Gm10025 |               | 3.158101509 | 2.01586151  | 1.548365068 | 2.081463196 | 1.438856355 | 1.018670261 | 0.388291761 | 1.4507315   | 3.69272679  | 2.091486864 |
| ENSMUSG00000059447 | -0.013413904 | 5.740011634  | 0.003529296 | 0.952627239 | 0.999071534 | Hadhb   | Hadhb   | HADHB         | 63.23221022 | 56.62199241 | 50.9614068  | 55.29753892 | 51.99503647 | 72.10730207 | 74.03429574 | 41.86396615 | 29.62038297 | 45.22840344 |
| ENSMUSG00000004069 | -0.013932627 | 5.285840604  | 0.003515864 | 0.952717369 | 0.999071534 | Dnaja3  | Dnaja3  | DNAI3         | 45.05558153 | 43.87463286 | 33.12154841 | 38.1601586  | 42.96948297 | 55.44476708 | 52.35467242 | 33.71223677 | 21.05639957 | 29.60761092 |
| ENSMUSG00000034109 | -0.01335224  | 6.603756742  | 0.003507118 | 0.952776144 | 0.999071534 | Golim4  | Golim4  | GOLIM4        | 72.91705485 | 115.1412662 | 104.2790213 | 99.632705   | 114.1928725 | 110.6712477 | 96.2316414  | 94.29754752 | 90.1182474  | 73.79027093 |
| ENSMUSG00000069833 | -0.016860024 | 9.671040199  | 0.003505992 | 0.952783715 | 0.999071534 | Ahnak   | Ahnak   | AHNAK         | 585.4418398 | 828.1040502 | 965.6412406 | 1040.870362 | 811.3187766 | 754.2525663 | 595.4454153 | 787.0563801 | 864.8051867 | 834.176464  |
| ENSMUSG00000023460 | -0.012286062 | 6.094066242  | 0.003503542 | 0.952800194 | 0.999071534 | Rab12   | Rab12   | RAB12         | 60.28464881 | 66.34555969 | 72.90779863 | 75.76526035 | 79.5295149  | 71.16139397 | 70.60438519 | 72.1220803  | 50.20537061 | 64.37858004 |
| ENSMUSG00000090077 | 0.024666899  | 3.231236214  | 0.003503021 | 0.952803702 | 0.999071534 | Lime1   | Lime1   | RP4-583P15.14 | 13.82546661 | 11.02794826 | 9.088229746 | 6.313771696 | 7.652099707 | 6.184783729 | 5.630230533 | 10.36236786 | 4.16413872  | 18.75802281 |

|                     |              |              |             |             |             |               |               |               |             |             |             |             |             |             |             |              |             |             |
|---------------------|--------------|--------------|-------------|-------------|-------------|---------------|---------------|---------------|-------------|-------------|-------------|-------------|-------------|-------------|-------------|--------------|-------------|-------------|
| ENSMUSG00000051351  | 0.018366651  | 3.499935315  | 0.003481084 | 0.952951538 | 0.999071534 | Zfp46         | Zfp46         | ZNF436        | 10.2462849  | 12.51019937 | 9.626791509 | 9.782877023 | 15.69661478 | 15.71662689 | 7.895265804 | 10.63869767  | 7.621159544 | 13.46394669 |
| ENSMUSG00000048078  | 0.020205649  | 6.200087701  | 0.003472627 | 0.95300866  | 0.999071534 | Tenm4         | Tenm4         | TENM4         | 35.51109697 | 56.56270236 | 103.1345776 | 107.1953546 | 71.94281776 | 95.75500456 | 35.14040436 | 46.56157291  | 95.30377863 | 78.75755223 |
| ENSMUSG00000070501  | -0.033600956 | 1.288510624  | 0.00346147  | 0.95308412  | 0.999071534 | BC094916      | BC094916      |               | 3.438821644 | 2.96450222  | 1.548365068 | 2.567137942 | 1.569661478 | 4.875064822 | 2.588611739 | 1.105319238  | 0.392843275 | 2.810435474 |
| ENSMUSG00000027180  | 0.012350773  | 5.896227731  | 0.003458772 | 0.95310239  | 0.999071534 | Fbxo3         | Fbxo3         | FBXO3         | 60.49518891 | 53.83536032 | 68.59930453 | 53.90989679 | 70.83097421 | 59.59221029 | 76.04046984 | 49.11762365  | 45.17697668 | 58.62699116 |
| ENSMUSG00000034112  | -0.061318874 | -0.474378919 | 0.003455047 | 0.953127622 | 0.999071534 | Atp2c2        | Atp2c2        | ATP2C2        | 1.122880537 | 0.355740266 | 0           | 0.138764213 | 1.504258917 | 1.600767553 | 0.388291761 | 0.483577167  | 0           | 0.522871716 |
| ENSMUSG00000027947  | 0.016853547  | 5.467268066  | 0.003432182 | 0.953282795 | 0.999071534 | Il6ra         | Il6ra         | IL6R          | 34.59875654 | 47.55061561 | 36.75684031 | 57.2402379  | 50.42537499 | 38.12737264 | 20.64417862 | 52.84807608  | 48.63399751 | 48.49635166 |
| ENSMUSG00000025102  | -0.022473495 | 3.52785118   | 0.003431861 | 0.953284975 | 0.999071534 | 3110040N11Rik | 3110040N11Rik | C15orf40      | 22.52779077 | 11.0872383  | 8.213066882 | 9.921641237 | 8.175320199 | 10.25946477 | 17.73199041 | 6.839162787  | 6.049786443 | 14.31361323 |
| ENSMUSG00000030208  | -0.015673075 | 8.891481359  | 0.003430086 | 0.953297046 | 0.999071534 | Emp1          | Emp1          | EMP1          | 433.151167  | 633.7512847 | 498.1023103 | 420.4555657 | 496.8632604 | 459.49305   | 621.1373868 | 488.7583507  | 332.1882738 | 382.4153013 |
| ENSMUSG00000033767  | -0.012671371 | 5.11831883   | 0.003429703 | 0.953299652 | 0.999071534 | D930015E06Rik | D930015E06Rik | KIAA0922      | 33.475876   | 33.08384478 | 36.21827854 | 37.46633754 | 39.96096514 | 40.091951   | 25.43311034 | 33.2286596   | 30.01322625 | 37.58140459 |
| ENSMUSG00000030380  | -0.037747791 | 0.525627447  | 0.003425407 | 0.953328874 | 0.999071534 | Mzf1          | Mzf1          | MZF1          | 0.98252047  | 1.185800888 | 1.95228639  | 1.179495811 | 1.569661478 | 1.746291877 | 0.19414588  | 0.898071881  | 1.257098482 | 2.156845829 |
| ENSMUSG00000026843  | 0.013937596  | 5.976916552  | 0.003423301 | 0.95334321  | 0.999071534 | Fubp3         | Fubp3         | FUBP3         | 55.79312667 | 46.72055499 | 86.57380336 | 59.94614006 | 75.53995864 | 66.35909131 | 47.88931717 | 63.62493865  | 65.60482701 | 57.38517084 |
| ENSMUSG000000062175 | -0.053644168 | 0.517735165  | 0.00341942  | 0.953369633 | 0.999071534 | Tgif2         | Tgif2         | TGIF2         | 0.912340436 | 1.185800888 | 2.827449254 | 1.318260024 | 0.523220493 | 4.220205368 | 2.135604685 | 0            | 0.392843275 | 0.065358965 |
| ENSMUSG00000039318  | -0.015341003 | 5.251807676  | 0.003416878 | 0.953386947 | 0.999071534 | Rab3gap2      | Rab3gap2      | RAB3GAP2      | 31.79155519 | 50.69298797 | 33.32350907 | 33.37279325 | 49.57514169 | 44.53044285 | 27.24513855 | 56.85485832  | 20.50641898 | 35.68599462 |
| ENSMUSG00000074277  | -0.029018171 | 1.536005262  | 0.003414559 | 0.953402748 | 0.999071534 | Phldb3        | Phldb3        | PHLDB3        | 2.456301174 | 3.735272798 | 3.366011017 | 2.22022741  | 2.746907587 | 2.910486461 | 0.841298815 | 3.17779281   | 2.592765618 | 3.594743048 |
| ENSMUSG000000066771 | -0.048761518 | -0.471547808 | 0.003411273 | 0.953425153 | 0.999071534 | Gm5614        | Gm5614        |               | 0.140360067 | 0.237160178 | 1.144443746 | 0.555056852 | 1.046440986 | 0.218286485 | 0.582437641 | 0.4835577167 | 0.864255206 | 0.522871716 |
| ENSMUSG00000031107  | 0.017803112  | 4.935957826  | 0.003362851 | 0.953756517 | 0.999071534 | RbmX2         | RbmX2         | RBMX2         | 22.94887097 | 16.30476221 | 48.33591821 | 37.25819122 | 31.39322957 | 24.59361059 | 28.02172208 | 23.62619872  | 36.37728731 | 31.24158503 |
| ENSMUSG00000047696  | -0.047368199 | -0.288907254 | 0.003293153 | 0.954237718 | 0.999071534 | Ccdc144b      | Ccdc144b      | RP11-392E22.9 | 0.350900168 | 0.237160178 | 1.211763966 | 1.248877918 | 0.523220493 | 0.291048646 | 0.258861174 | 0.759906976  | 0.392843275 | 1.503256184 |
| ENSMUSG00000037257  | 0.013397314  | 5.254834362  | 0.003287623 | 0.954276109 | 0.999071534 | Aagab         | Aagab         | AAGAB         | 57.89852767 | 35.87047687 | 31.23658224 | 32.33206165 | 40.15717282 | 48.53236174 | 46.27143484 | 34.95572091  | 28.5204218  | 28.43114956 |
| ENSMUSG00000079884  | 0.094011049  | 4.286727607  | 0.003277311 | 0.954347798 | 0.999071534 | Gm10698       | Gm10698       |               | 55.09132633 | 37.17485784 | 0           | 0           | 7.128879214 | 40.091951   | 65.10358524 | 0            | 0           | 0           |
| ENSMUSG00000025485  | -0.013898241 | 5.464488883  | 0.003275671 | 0.954359213 | 0.999071534 | Ric8          | Ric8a         | RIC8A         | 66.17977163 | 52.94600966 | 32.51566643 | 39.96409337 | 38.78371903 | 52.82532927 | 58.50262531 | 35.85379279  | 30.32750087 | 36.73173805 |
| ENSMUSG00000031059  | -0.014401513 | 7.137992401  | 0.00325117  | 0.954530036 | 0.999071534 | Ndufb11       | Ndufb11       | NDUFB11       | 172.2919823 | 113.1846948 | 141.8437043 | 164.9906494 | 140.1576895 | 110.7440098 | 150.6572032 | 129.2532684  | 110.4675291 | 168.5607695 |
| ENSMUSG00000025810  | -0.01689797  | 7.491655669  | 0.003233322 | 0.954654879 | 0.999071534 | Nrp1          | Nrp1          | NRP1          | 122.9554188 | 132.0389289 | 270.1560442 | 245.7514214 | 159.9092631 | 201.1146144 | 139.6556033 | 145.6948921  | 189.1933215 | 178.691409  |
| ENSMUSG00000024866  | 0.036640921  | 0.066237326  | 0.003231902 | 0.954664827 | 0.999071534 | Acy3          | Acy3          | ACY3          | 0.561440268 | 1.185800888 | 1.144443746 | 0.971349492 | 0.784830739 | 1.309718907 | 0.841298815 | 1.174401691  | 0.392843275 | 0.849666539 |
| ENSMUSG00000038605  | -0.029847217 | 1.45082521   | 0.003225206 | 0.954711762 | 0.999071534 | Samd10        | Samd10        | SAMD10        | 2.807201342 | 1.48225111  | 1.615685288 | 4.371072713 | 3.27012808  | 4.365729691 | 3.106334087 | 1.657978857  | 2.435628308 | 1.111102397 |
| ENSMUSG00000059422  | 0.053681616  | 2.217347851  | 0.003205409 | 0.954850822 | 0.999071534 | Gm8116        | Gm8116        |               | 8.772504193 | 8.004155995 | 3.971893    | 0           | 2.550699902 | 10.25946477 | 11.00159989 | 1.796143762  | 0           | 1.111102397 |
| ENSMUSG00000031731  | -0.011889004 | 6.198858484  | 0.003183797 | 0.955003123 | 0.999071534 | Ap1g1         | Ap1g1         | AP1G1         | 64.42527079 | 88.16429603 | 77.35093317 | 71.94924449 | 80.3797482  | 96.6281505  | 64.84472407 | 78.06317121  | 57.90509881 | 58.5616322  |
| ENSMUSG00000041202  | -0.049277974 | -0.261379005 | 0.003178517 | 0.955040414 | 0.999071534 | Pla2g2d       | Pla2g2d       | PLA2G2D       | 1.543960738 | 0.355740266 | 1.077123525 | 0.485674746 | 0.261610246 | 0.436572969 | 0.129430587 | 0.207247357  | 0.549980586 | 1.960768935 |
| ENSMUSG00000010517  | 0.017097563  | 5.767639919  | 0.003176691 | 0.955053318 | 0.999071534 | Faf1          | Faf1          | FAF1          | 78.2507374  | 88.10500599 | 42.34441859 | 30.04245214 | 44.08132652 | 67.45052373 | 87.3009309  | 46.1470782   | 27.10618601 | 42.41796796 |
| ENSMUSG00000037857  | 0.013044741  | 5.450391827  | 0.003176098 | 0.95505751  | 0.999071534 | Nufip2        | Nufip2        | NUFIP2        | 43.02036056 | 52.4716893  | 44.90258697 | 38.78459756 | 46.43581873 | 48.9689347  | 35.14040436 | 56.57852851  | 39.99144544 | 29.47689299 |
| ENSMUSG00000048758  | 0.018392257  | 7.870670659  | 0.003146956 | 0.955263945 | 0.999071534 | Rpl29         | Rpl29         | RPL29         | 212.8560417 | 131.2088683 | 316.6743165 | 317.5619017 | 218.9677762 | 154.8378797 | 169.6187842 | 258.0229597  | 255.7409723 | 261.8933708 |
| ENSMUSG00000040028  | -0.013378067 | 6.917095596  | 0.003134657 | 0.955351358 | 0.999071534 | Elavl1        | Elavl1        | ELAVL1        | 96.98880635 | 106.7220799 | 143.5267098 | 142.7189932 | 137.3453794 | 152.2912041 | 95.90806494 | 100.3077209  | 116.6744528 | 114.8357006 |
| ENSMUSG000000061894 | 0.024093629  | 1.959801837  | 0.003134591 | 0.955351828 | 0.999071534 | Zscan20       | Zscan20       | ZSCAN20       | 4.35116208  | 4.861783641 | 3.231370576 | 3.330341114 | 3.597140888 | 3.274297269 | 2.78275762  | 5.872008453  | 2.592765618 | 3.660102012 |
| ENSMUSG00000015944  | 0.014083792  | 4.836829652  | 0.003129453 | 0.955388397 | 0.999071534 | Gatsl2        | Gatsl2        | GATS          | 29.19489395 | 28.87425163 | 32.04442488 | 24.70002993 | 32.37426799 | 31.65154026 | 16.56711513 | 25.14601267  | 31.97744262 | 30.71871332 |
| ENSMUSG00000031434  | -0.012306306 | 5.702274971  | 0.003125611 | 0.955415761 | 0.999071534 | Morc4         | Morc4         | MORC4         | 43.23090066 | 60.89087561 | 54.19277738 | 50.71831989 | 61.80542071 | 65.9952805  | 33.65195261 | 48.35771668  | 45.64838861 | 56.99301705 |
| ENSMUSG00000027957  | -0.014156233 | 5.905820053  | 0.003122521 | 0.955437781 | 0.999071534 | Sk35a3        | Sk35a3        | SLC35A3       | 57.26690737 | 71.62237364 | 66.24309682 | 49.7469704  | 68.08406662 | 70.94310748 | 97.91423903 | 49.87753063  | 36.84869924 | 36.60102012 |
| ENSMUSG00000004264  | 0.014187894  | 7.595621129  | 0.003116865 | 0.955478118 | 0.999071534 | Phb2          | Phb2          | PHB2          | 219.3126048 | 159.7273796 | 213.270458  | 204.9547427 | 200.2626436 | 235.8221655 | 256.2078469 | 143.0006765  | 131.5239286 | 185.0965875 |
| ENSMUSG00000009293  | 0.018256069  | 5.965774149  | 0.00310972  | 0.955529124 | 0.999071534 | Ube2g2        | Ube2g2        | UBE2G2        | 78.6718176  | 91.60311861 | 34.7372337  | 41.69864604 | 77.69824318 | 90.51612893 | 104.3857684 | 35.92287524  | 25.14196963 | 59.08450391 |
| ENSMUSG00000082246  | -0.036888141 | 0.581865888  | 0.003106266 | 0.955553803 | 0.999071534 | Gm13047       | Gm13047       |               | 1.473780704 | 0.830060622 | 2.962089695 | 0.485674746 | 1.438856355 | 2.110102684 | 2.588611739 | 0.759906976  | 0.549980586 | 0.71894861  |
| ENSMUSG00000035007  | 0.015871519  | 4.168838226  | 0.003102163 | 0.955583136 | 0.999071534 | Rundc1        | Rundc1        | RUND C1       | 16.28176778 | 22.53021687 | 14.60848781 | 15.81912029 | 23.21790937 | 19.71854577 | 14.49622574 | 25.14601267  | 9.349669957 | 19.01945867 |

|                      |              |              |             |             |             |               |               |               |             |             |             |             |             |             |             |             |             |             |
|----------------------|--------------|--------------|-------------|-------------|-------------|---------------|---------------|---------------|-------------|-------------|-------------|-------------|-------------|-------------|-------------|-------------|-------------|-------------|
| ENSMUSG00000001844   | -0.014745442 | 4.267304391  | 0.00310182  | 0.955585594 | 0.999071534 | Zdhhc4        | Zdhhc4        | ZDHHC4        | 22.1768906  | 25.13897883 | 21.07122897 | 14.15394974 | 17.59328907 | 22.77455656 | 13.07248928 | 16.51070612 | 17.6779474  | 21.76453518 |
| ENSMUSG00000000693   | -0.01255731  | 5.142174074  | 0.003097508 | 0.955616445 | 0.999071534 | Loxl3         | Loxl3         | LOXL3         | 34.59875654 | 41.44374104 | 36.82416053 | 35.59302066 | 34.92496789 | 56.75448599 | 29.44545853 | 25.14601267 | 25.29910694 | 37.05853287 |
| ENSMUSG000000028470  | -0.018693561 | 4.18306046   | 0.003094768 | 0.955636058 | 0.999071534 | Hint2         | Hint2         | HINT2         | 17.54500839 | 9.071376794 | 26.12024549 | 24.83879414 | 15.89282247 | 12.6606161  | 14.81980221 | 14.507315   | 20.11357571 | 21.89525311 |
| ENSMUSG000000045817  | 0.015224068  | 8.086190724  | 0.003093517 | 0.955645012 | 0.999071534 | Zfp36l2       | Zfp36l2       | ZFP36L2       | 242.0509357 | 248.6031562 | 338.6880285 | 296.7472697 | 272.7286819 | 380.6916291 | 164.1179843 | 302.8574713 | 225.9634521 | 257.710397  |
| ENSMUSG000000087128  | 0.041126282  | 0.102327061  | 0.00309106  | 0.955662612 | 0.999071534 | Gm12655       | Gm12655       |               | 1.473780704 | 0.474320355 | 1.683005509 | 0.971349492 | 0.196207685 | 0.654859454 | 0.776583522 | 1.657978857 | 0.392843275 | 1.111102397 |
| ENSMUSG000000028033  | 0.030327215  | 0.92740258   | 0.003086371 | 0.955696224 | 0.999071534 | Kcng5         | Kcng5         | KCNQ5         | 2.737021308 | 2.193731643 | 1.750325729 | 0.832585279 | 1.63506404  | 1.45524323  | 2.7969035   | 1.174401691 | 1.178529826 | 1.830051006 |
| ENSMUSG000000039270  | 0.023270104  | 2.666217924  | 0.003083818 | 0.955714527 | 0.999071534 | Megf9         | Megf9         | MEGF9         | 4.140621979 | 6.581194929 | 4.308494102 | 10.06040545 | 6.605658721 | 10.11394045 | 7.571689337 | 2.832380548 | 5.421237202 | 4.967281302 |
| ENSMUSG000000038781  | 0.020615584  | 2.917032401  | 0.003080388 | 0.955739142 | 0.999071534 | Stap2         | Stap2         | STAP2         | 10.52700503 | 5.751134307 | 10.23267349 | 6.175007483 | 5.624620297 | 8.876983706 | 4.853647011 | 7.184575049 | 5.499805857 | 9.934562605 |
| ENSMUSG000000006281  | 0.013136617  | 4.826721565  | 0.003072422 | 0.955796345 | 0.999071534 | Tep1          | Tep1          | TEP1          | 29.89669429 | 39.54645962 | 22.28299293 | 23.45115201 | 31.327827   | 42.49310233 | 24.39766564 | 23.97161098 | 22.31349805 | 26.3396627  |
| ENSMUSG000000070343  | -0.015067686 | 9.398512799  | 0.003069961 | 0.955814036 | 0.999071534 | Gm10288       | Gm10288       |               | 698.6422339 | 584.2440976 | 811.4106158 | 779.0916744 | 636.1707166 | 506.4974064 | 802.9226462 | 670.5833654 | 577.4010463 | 635.223776  |
| ENSMUSG000000004500  | -0.023252234 | 2.267099954  | 0.003066202 | 0.955841071 | 0.999071534 | Zfp324        | Zfp324        | ZNF324        | 5.333682549 | 4.387463286 | 2.625488593 | 6.383153803 | 5.690022859 | 7.421740475 | 4.335924663 | 3.592287524 | 4.556981996 | 2.810435474 |
| ENSMUSG000000005510  | -0.013461215 | 6.52885101   | 0.003059983 | 0.955885829 | 0.999071534 | Ndufs3        | Ndufs3        | NDUFS3        | 115.7268753 | 61.60235614 | 119.2241102 | 96.57989232 | 87.11621205 | 80.91152361 | 87.10678502 | 80.89555175 | 83.91132364 | 104.8357791 |
| ENSMUSG000000029864  | 0.037166976  | 0.571483616  | 0.003041586 | 0.956018505 | 0.999071534 | Gstk1         | Gstk1         | GSTK1         | 0.701800335 | 1.600831199 | 1.481044848 | 1.873316877 | 1.177246109 | 3.056010784 | 2.329750565 | 0.690824524 | 0.15713731  | 0.849666539 |
| ENSMUSG000000085355  | 0.031593731  | 0.818228518  | 0.003025747 | 0.956133054 | 0.999071534 | 3010003L21Rik | 3010003L21Rik |               | 1.263240604 | 1.185800888 | 3.029409915 | 1.248877918 | 1.63506404  | 1.746291877 | 1.423736457 | 0.828989429 | 1.021392516 | 3.006512367 |
| ENSMUSG000000097039  | 0.014876526  | 4.53345361   | 0.00302045  | 0.956171431 | 0.999071534 | Pvt1          | Pvt1          |               | 25.47535218 | 27.80703083 | 22.48495359 | 23.45115201 | 19.55536592 | 17.3901566  | 23.23279036 | 21.13923043 | 27.42046063 | 19.1501766  |
| ENSMUSG000000053070  | 0.016527121  | 6.998316779  | 0.003020074 | 0.956174152 | 0.999071534 | 9230110C19Rik | 9230110C19Rik | C11orf70      | 96.70808622 | 178.0480034 | 113.8384926 | 105.3914198 | 167.6267654 | 86.8052587  | 129.8188787 | 206.1420379 | 76.44730141 | 115.5546492 |
| ENSMUSG000000049734  | -0.016015586 | 3.856937582  | 0.003001255 | 0.95631078  | 0.999071534 | Trex1         | Trex1         | TREX1         | 15.29924731 | 11.32439848 | 17.16665619 | 15.61097397 | 15.43500454 | 18.77263767 | 9.060141087 | 12.15851162 | 10.92104306 | 18.82338178 |
| ENSMUSG000000005951  | -0.042219433 | 0.326552745  | 0.002999648 | 0.956322463 | 0.999071534 | Shpk          | Shpk          | RP11-235E17.2 | 1.473780704 | 1.660121243 | 0.06732022  | 0.416292639 | 2.354492217 | 2.037340523 | 0.388291761 | 1.4507315   | 0.864255206 | 0.71894861  |
| ENSMUSG000000091890  | -0.048926804 | -0.299142853 | 0.002998075 | 0.956333908 | 0.999071534 | A830073O21Rik | A830073O21Rik |               | 0           | 0.5336104   | 1.615685288 | 1.040731598 | 0.327012808 | 0.582097292 | 0.906014109 | 0.828989429 | 0.15713731  | 0.784307574 |
| ENSMUSG0000000031751 | -0.013352113 | 7.524898174  | 0.002992186 | 0.956376772 | 0.999071534 | Amfr          | Amfr          | AMFR          | 177.906385  | 213.4441599 | 173.8881291 | 201.6937837 | 191.6295055 | 224.8350791 | 188.7097958 | 153.4321268 | 173.3224531 | 144.0511578 |
| ENSMUSG000000029616  | 0.014800544  | 6.849710631  | 0.002986229 | 0.956420173 | 0.999071534 | Erp29         | Erp29         | ERP29         | 155.7294944 | 105.2991189 | 108.9914367 | 113.0234516 | 112.6886136 | 130.171507  | 195.1813251 | 73.64189425 | 68.04045531 | 101.6985488 |
| ENSMUSG000000027575  | 0.012026283  | 5.26067831   | 0.002981907 | 0.956451687 | 0.999071534 | Arfgap1       | Arfgap1       | ARFGAP1       | 43.16072063 | 44.82327357 | 40.0555311  | 35.66240277 | 33.94392947 | 44.38491853 | 27.37456914 | 38.47892598 | 28.99183373 | 46.99309548 |
| ENSMUSG000000019984  | 0.013180387  | 4.979111221  | 0.002977172 | 0.956486241 | 0.999071534 | Med23         | Med23         | MED23         | 30.10723439 | 35.69260673 | 36.28559876 | 21.1615425  | 39.89556257 | 33.61611862 | 21.93848449 | 38.06443127 | 25.77051887 | 32.54876432 |
| ENSMUSG000000056234  | 0.011505434  | 6.5879878    | 0.002973058 | 0.956516291 | 0.999071534 | Ncoa4         | Ncoa4         | NCOA4         | 91.58494377 | 101.0302357 | 93.03654451 | 87.9765111  | 124.1994645 | 110.816772  | 85.61833327 | 97.95891749 | 83.04706844 | 88.16924312 |
| ENSMUSG000000020420  | -0.026762504 | 1.575750355  | 0.002971807 | 0.956525432 | 0.999071534 | Zfp607        | Zfp607        | ZNF780B       | 1.333420637 | 3.557402664 | 3.231370576 | 4.232308499 | 2.419894779 | 4.584016176 | 2.459181152 | 1.72706131  | 2.828471584 | 2.222204793 |
| ENSMUSG000000069125  | -0.031212838 | 1.106568651  | 0.002970969 | 0.956531554 | 0.999071534 | Rps24-ps2     | Rps24-ps2     |               | 3.017741442 | 1.660121243 | 1.95228639  | 1.526406344 | 2.485297341 | 1.600767553 | 4.724216424 | 0.967154334 | 0.707117896 | 1.764692042 |
| ENSMUSG000000019970  | -0.014827101 | 8.199042747  | 0.00295604  | 0.956640798 | 0.999071534 | Sgk1          | Sgk1          | SGK1          | 403.5351929 | 276.1137368 | 354.5756005 | 273.1573535 | 226.2274606 | 320.4445593 | 291.4776818 | 251.5982916 | 296.6752416 | 237.9066308 |
| ENSMUSG000000017697  | 0.021077648  | 3.180388996  | 0.002949755 | 0.956686869 | 0.999071534 | Ada           | Ada           | ADA           | 10.2462849  | 6.99622524  | 9.76143195  | 9.574730704 | 9.41796887  | 14.77071879 | 14.43151045 | 7.460904859 | 2.828471584 | 6.013024734 |
| ENSMUSG000000024896  | 0.013096184  | 5.367999284  | 0.002946266 | 0.956712468 | 0.999071534 | Minpp1        | Minpp1        | MINPP1        | 59.09158824 | 36.75982753 | 34.60259326 | 38.92336177 | 43.95052139 | 62.72098323 | 50.08963715 | 25.69867229 | 30.24893221 | 35.68599462 |
| ENSMUSG000000037058  | -0.014180161 | 7.045241875  | 0.002928985 | 0.956839483 | 0.999071534 | Paip2         | Paip2         | PAIP2         | 125.2713599 | 156.2885571 | 125.3502503 | 152.8487807 | 126.7501644 | 86.2231614  | 141.0793398 | 165.0379788 | 100.8035845 | 130.717929  |
| ENSMUSG000000037503  | -0.011778583 | 6.625656316  | 0.002927942 | 0.956847157 | 0.999071534 | Fam168b       | Fam168b       | FAM168B       | 109.2001322 | 118.876539  | 91.62281989 | 87.49083636 | 108.2412394 | 152.1456797 | 91.96043203 | 91.67241433 | 68.51186725 | 81.50262874 |
| ENSMUSG000000041528  | 0.015294814  | 4.200055534  | 0.00291324  | 0.956955526 | 0.999071534 | Rnf123        | Rnf123        | RNF123        | 22.66815083 | 22.11518656 | 17.23397641 | 12.00310443 | 20.79801459 | 24.08427546 | 9.966155196 | 19.06675686 | 15.87086833 | 20.0652021  |
| ENSMUSG000000029718  | 0.014752644  | 8.870280773  | 0.002911357 | 0.956969429 | 0.999071534 | Pcolce        | Pcolce        | PCOLCE        | 387.4639652 | 423.9831076 | 487.3310751 | 521.8922055 | 591.5661696 | 371.2325481 | 419.3551017 | 529.1025029 | 415.3924795 | 498.4928223 |
| ENSMUSG000000028214  | -0.01807665  | 5.463907022  | 0.002891844 | 0.957113733 | 0.999071534 | Gem           | Gem           | GEM           | 31.93191526 | 58.93430414 | 46.3163116  | 43.08628817 | 49.57514169 | 25.46675653 | 23.29750565 | 84.41875683 | 26.39906811 | 48.16955684 |
| ENSMUSG000000052926  | -0.01242166  | 5.245312895  | 0.002859962 | 0.957350572 | 0.999071534 | Rnaseh2a      | Rnaseh2a      | RNASEH2A      | 47.79260284 | 30.06005251 | 40.93069397 | 41.97617446 | 36.03681144 | 50.4969401  | 44.26526074 | 24.10977589 | 29.54181432 | 35.88207151 |
| ENSMUSG000000014846  | 0.026121561  | 2.260948705  | 0.002852923 | 0.957403042 | 0.999071534 | Tppp3         | Tppp3         | TPPP3         | 7.228543455 | 1.422961066 | 6.395420932 | 3.191576901 | 5.886230544 | 3.856394561 | 2.588611739 | 5.802926001 | 2.985608894 | 7.385562989 |
| ENSMUSG000000032547  | -0.014020736 | 7.647502775  | 0.002849761 | 0.957426625 | 0.999071534 | Ryk           | Ryk           | RYK           | 164.9932589 | 206.0921944 | 226.6671819 | 233.9564633 | 209.9422227 | 192.3831551 | 153.698822  | 234.1895136 | 194.3002841 | 173.9855635 |
| ENSMUSG000000093973  | 0.087456176  | -0.674627015 | 0.002849292 | 0.957430126 | 0.999071534 | Mrgpra2a      | Mrgpra2a      | MRGPRX4       | 1.473780704 | 1.007930755 | 0           | 0           | 0           | 0           | 0.323576467 | 0           | 0           | 2.091486864 |
| ENSMUSG000000081272  | -0.083715945 | 2.272656404  | 0.002848158 | 0.957438591 | 0.999071534 | Gm13509       | Gm13509       |               | 12.1411458  | 13.16238986 | 0.134640441 | 0           | 0           | 12.87890259 | 11.64875283 | 0           | 0           | 0           |

|                     |              |              |             |             |             |               |               |               |             |             |             |             |             |             |             |             |             |             |
|---------------------|--------------|--------------|-------------|-------------|-------------|---------------|---------------|---------------|-------------|-------------|-------------|-------------|-------------|-------------|-------------|-------------|-------------|-------------|
| ENSMUSG00000026504  | 0.014300579  | 4.187165054  | 0.002841145 | 0.957490973 | 0.999071534 | Sdccag8       | Sdccag8       | SDCCAG8       | 17.47482835 | 21.93731643 | 18.17645949 | 16.79046978 | 19.09754799 | 13.97033501 | 14.81980221 | 20.72473572 | 15.47802505 | 21.43774036 |
| ENSMUSG000000022323 | 0.014820872  | 4.457433124  | 0.002833282 | 0.957549781 | 0.999071534 | Hrsp12        | Rida          | RIDA          | 14.38690688 | 22.17447661 | 22.08103227 | 27.68346051 | 25.89941439 | 16.51701067 | 19.22044216 | 20.51748836 | 19.56359512 | 28.43114956 |
| ENSMUSG00000018040  | -0.013151289 | 6.484565337  | 0.002823052 | 0.957626414 | 0.999071534 | Rrp7a         | Rrp7a         | RRP7A         | 104.56825   | 101.445266  | 84.35223609 | 67.23126125 | 111.3151598 | 138.4663934 | 114.6107848 | 65.42108242 | 44.70556475 | 82.41765424 |
| ENSMUSG000000029279 | -0.015840409 | 4.228381185  | 0.002783998 | 0.957920257 | 0.999071534 | Brdt          | Brdt          | BRDT          | 27.15967298 | 15.77115181 | 10.77123525 | 20.88401407 | 22.69468887 | 15.64386473 | 21.42076214 | 13.26383086 | 15.39945644 | 22.94099654 |
| ENSMUSG00000017679  | 0.014459576  | 4.095003247  | 0.002782563 | 0.957931098 | 0.999071534 | Ttpal         | Ttpal         | TTPAL         | 15.86068758 | 17.25340292 | 16.69541464 | 20.19019301 | 17.33167882 | 28.45000516 | 15.33752455 | 11.12227484 | 11.47102364 | 18.49658695 |
| ENSMUSG00000017386  | -0.01375684  | 4.300665036  | 0.002754537 | 0.9581433   | 0.999071534 | Traf4         | Traf4         | TRAF4         | 21.1241901  | 19.0913943  | 20.33070654 | 18.17811192 | 23.61032474 | 34.12545375 | 15.72581632 | 20.03391119 | 10.92104306 | 16.79725388 |
| ENSMUSG00000048772  | 0.023204812  | 2.115733404  | 0.002736054 | 0.958283834 | 0.999071534 | Tmem53        | Tmem53        | TMEM53        | 5.193322482 | 3.913142931 | 2.692808814 | 4.440454819 | 5.428412612 | 2.764962138 | 2.847472913 | 6.217420715 | 2.749902928 | 5.620870947 |
| ENSMUSG00000059325  | -0.014987612 | 4.325880438  | 0.002733064 | 0.958306611 | 0.999071534 | Hopx          | Hopx          | HOPX          | 22.3874307  | 16.4233423  | 17.43593707 | 28.03037105 | 19.09754799 | 21.46483765 | 30.15732676 | 12.29667653 | 14.29949523 | 18.2351511  |
| ENSMUSG000000088549 | 0.066225477  | -0.663847435 | 0.002728337 | 0.958342654 | 0.999071534 | Gm24959       | Gm24959       |               | 0.631620302 | 0.118580089 | 1.750325729 | 0           | 0.065402562 | 0.072762162 | 0.064715293 | 0           | 0.707117896 | 1.503256184 |
| ENSMUSG000000033623 | -0.011432403 | 5.973774762  | 0.002717285 | 0.958427032 | 0.999071534 | Pcgf3         | Pcgf3         | PCGF3         | 67.7939124  | 85.3183739  | 53.92349649 | 46.90230403 | 74.68972534 | 81.71190739 | 68.79235697 | 60.23989849 | 43.60560358 | 51.82965885 |
| ENSMUSG000000031706 | 0.014655975  | 4.263326609  | 0.002703861 | 0.95852976  | 0.999071534 | Rfx1          | Rfx1          | RFX1          | 22.03653053 | 17.43127306 | 21.40783007 | 15.68035608 | 22.23687094 | 22.41074575 | 9.707294022 | 23.28078646 | 18.30649664 | 18.30051006 |
| ENSMUSG000000078192 | 0.029716596  | 1.221678005  | 0.002698971 | 0.958567244 | 0.999071534 | Gm7290        | Gm7290        |               | 3.298461576 | 2.253021687 | 3.298690797 | 1.040731598 | 1.504258917 | 1.164194584 | 1.359021163 | 1.312566595 | 3.78452169  | 3.006512367 |
| ENSMUSG000000022668 | -0.020731068 | 3.5029596    | 0.002695434 | 0.958594377 | 0.999071534 | Gtpbp8        | Gtpbp8        | GTPBP8        | 13.82546661 | 8.359896261 | 10.97319592 | 15.12529923 | 10.00659192 | 15.28005392 | 21.09718567 | 8.980718811 | 3.221314859 | 7.25484506  |
| ENSMUSG000000031380 | -0.013875767 | 4.999463937  | 0.002678197 | 0.958726859 | 0.999071534 | Figf          | Figf          | VEGFD         | 24.14193154 | 35.45544656 | 29.95749805 | 34.20537853 | 42.31545735 | 21.97417278 | 26.98627738 | 43.31469765 | 21.05639957 | 38.16963527 |
| ENSMUSG000000020888 | 0.011685021  | 4.863481426  | 0.002677956 | 0.958728718 | 0.999071534 | Dvl2          | Dvl2          | DVL2          | 26.80877281 | 31.54230362 | 32.71762709 | 26.15705417 | 32.76668336 | 34.99859969 | 21.09718567 | 33.2286596  | 23.02061594 | 28.75794438 |
| ENSMUSG000000004451 | -0.01149992  | 6.087809797  | 0.002672024 | 0.958774413 | 0.999071534 | Ralb          | Ralb          | RALB          | 81.05793874 | 79.86368982 | 53.38493473 | 57.2402379  | 83.91148653 | 89.13364786 | 81.02354744 | 62.31237206 | 41.16997527 | 59.54201666 |
| ENSMUSG000000032475 | 0.014127587  | 5.311191414  | 0.002650606 | 0.958939824 | 0.999071534 | Nck1          | Nck1          | NCK1          | 41.33603976 | 40.02077997 | 35.0738348  | 45.44527979 | 42.18465223 | 37.32698886 | 69.18064873 | 36.89002958 | 27.34189197 | 21.76453518 |
| ENSMUSG000000072762 | -0.022158426 | 2.918805306  | 0.002643336 | 0.958996117 | 0.999071534 | 4930522L14Rik | 4930522L14Rik | ZNF788        | 8.561964092 | 9.130666839 | 7.405224238 | 5.61995063  | 8.306125323 | 9.168032352 | 15.53167044 | 5.595678644 | 2.514196963 | 3.92153787  |
| ENSMUSG000000045573 | 0.03517818   | 0.951824456  | 0.002636401 | 0.959049894 | 0.999071534 | Penk          | Penk          | PENK          | 4.982782381 | 0.415030311 | 1.481044848 | 1.179495811 | 1.24264867  | 3.419821592 | 3.041618794 | 0.759906976 | 0.392843275 | 1.699333077 |
| ENSMUSG000000028189 | -0.01857579  | 3.896584305  | 0.002619459 | 0.959181569 | 0.999071534 | Ctbs          | Ctbs          | CTBS          | 16.28176778 | 20.57364541 | 6.732022034 | 15.68035608 | 17.98570444 | 18.918162   | 25.56254092 | 12.22759407 | 6.364061063 | 9.803844676 |
| ENSMUSG000000035439 | -0.014762034 | 4.125015202  | 0.002616785 | 0.959202389 | 0.999071534 | Haus8         | Haus8         | HAUS8         | 24.00157147 | 15.83044186 | 15.75293156 | 15.19468133 | 19.94778129 | 29.97801055 | 18.76743511 | 11.05319238 | 9.192532646 | 17.64692042 |
| ENSMUSG000000027422 | 0.016495721  | 8.404382683  | 0.002613999 | 0.959224093 | 0.999071534 | Rrbp1         | Rrbp1         | RRBP1         | 210.5401006 | 366.7682147 | 435.7637863 | 353.8487434 | 377.1111702 | 328.3028728 | 147.4214385 | 388.4506298 | 365.9727954 | 380.8466862 |
| ENSMUSG000000040723 | 0.019936705  | 2.685442948  | 0.002612422 | 0.959236386 | 0.999071534 | Rcsd1         | Rcsd1         | RCS1          | 7.579443623 | 5.988294485 | 7.539864678 | 5.411804311 | 6.017035667 | 13.02442691 | 5.953807    | 3.45412262  | 4.949825271 | 4.509768551 |
| ENSMUSG000000023960 | -0.049651699 | -0.302992954 | 0.002611758 | 0.959241565 | 0.999071534 | Enpp5         | Enpp5         | ENPP5         | 1.473780704 | 0.889350666 | 0           | 0.416292639 | 0.784830739 | 1.45524323  | 1.035444696 | 0.27632981  | 0           | 0.653589645 |
| ENSMUSG000000034610 | -0.02304378  | 2.809453958  | 0.002609917 | 0.959255915 | 0.999071534 | Zcchc11       | Zcchc11       | ZCCHC11       | 10.17610486 | 12.62877946 | 3.298690797 | 3.191576901 | 7.063476652 | 10.98708639 | 7.636404631 | 8.08264693  | 3.8498641   | 3.398666154 |
| ENSMUSG000000096145 | 0.013442534  | 4.72533388   | 0.002599193 | 0.95933964  | 0.999071534 | Vkorc1        | Vkorc1        | RP11-196G11.1 | 27.72111325 | 26.44335981 | 26.99540836 | 29.83430582 | 24.72216828 | 29.6869619  | 39.79990549 | 17.47786046 | 13.98522061 | 29.15009817 |
| ENSMUSG000000098265 | -0.057563707 | -0.131985792 | 0.002584153 | 0.959457348 | 0.999071534 | TUG1_3        | Gm27517       |               | 0.561440268 | 2.54947191  | 0.269280881 | 0           | 0.719428178 | 1.600767553 | 1.035444696 | 1.243484143 | 0           | 0           |
| ENSMUSG000000044221 | 0.010893467  | 6.411339264  | 0.002582487 | 0.959470409 | 0.999071534 | Grsf1         | Grsf1         | GRSF1         | 80.21577834 | 97.94715336 | 75.1293659  | 79.92818674 | 107.1947985 | 94.7363343  | 97.72009315 | 88.84003378 | 55.94088243 | 78.43075741 |
| ENSMUSG000000037017 | -0.017910542 | 3.808507237  | 0.002580347 | 0.959487186 | 0.999071534 | Zscan21       | Zscan21       | ZSCAN21       | 13.54474647 | 18.0241735  | 14.27188671 | 6.660682229 | 20.66720946 | 7.858313444 | 11.45460695 | 16.64887103 | 10.92104306 | 18.36586903 |
| ENSMUSG000000027167 | -0.018248833 | 3.531117505  | 0.002556123 | 0.959677637 | 0.999071534 | Elp4          | Elp4          | ELP4          | 15.15888725 | 8.359896261 | 17.43593707 | 8.950291745 | 9.941189363 | 17.60844309 | 15.46695514 | 9.049801264 | 4.085570065 | 10.91494707 |
| ENSMUSG000000028551 | 0.011596184  | 6.659532668  | 0.002553319 | 0.959699742 | 0.999071534 | Cdkn2c        | Cdkn2c        | CDKN2C        | 101.3399684 | 99.37011443 | 95.52739266 | 105.6689483 | 120.0791031 | 90.9527019  | 88.3363756  | 134.4344524 | 74.95449696 | 97.84236986 |
| ENSMUSG000000034259 | 0.011935381  | 5.525130067  | 0.002552661 | 0.959704928 | 0.999071534 | Exosc4        | Exosc4        | EXOSC4        | 57.05636727 | 31.7794638  | 52.50977187 | 57.03209158 | 37.93348573 | 47.36816715 | 40.96478077 | 40.27506975 | 41.40568124 | 51.30678714 |
| ENSMUSG000000096967 | -0.033955506 | 0.924217687  | 0.002552536 | 0.959705918 | 0.999071534 | Gm26621       | Gm26621       |               | 1.754500839 | 0.415030311 | 1.346404407 | 3.122194795 | 2.550699902 | 0.873145938 | 0.906014109 | 3.385040167 | 0.471411931 | 2.745076509 |
| ENSMUSG000000041164 | -0.012965436 | 5.146457607  | 0.002550696 | 0.959720433 | 0.999071534 | Zmi2          | Zmi2          | ZMI2          | 37.54631794 | 37.6491782  | 35.81435722 | 25.11632257 | 48.98651864 | 48.16855093 | 18.8968657  | 42.34754332 | 24.90626367 | 37.71212252 |
| ENSMUSG000000022292 | 0.016392002  | 4.107761879  | 0.002548924 | 0.959734416 | 0.999071534 | Rrm2b         | Rrm2b         | RRM2B         | 10.80772517 | 23.95317794 | 10.9058757  | 17.48429085 | 25.24538878 | 18.04501606 | 20.8383245  | 18.09960253 | 16.02800564 | 9.477049853 |
| ENSMUSG000000054611 | 0.013441281  | 6.629986558  | 0.002545732 | 0.959759609 | 0.999071534 | Kdm2a         | Kdm2a         | KDM2A         | 76.00497633 | 96.52419229 | 113.9058128 | 127.4549297 | 94.04888358 | 129.5894097 | 49.44248422 | 95.54103166 | 99.86076063 | 104.3782663 |
| ENSMUSG00000019838  | -0.014293407 | 4.43296146   | 0.002542317 | 0.959786584 | 0.999071534 | Slc16a10      | Slc16a10      | SLC16A10      | 16.21158775 | 21.99606648 | 15.01240914 | 24.14497308 | 34.66335765 | 23.86598898 | 16.76126101 | 27.90931077 | 16.57798623 | 18.10443317 |
| ENSMUSG000000063687 | 0.033976545  | 0.175676222  | 0.002538817 | 0.959814257 | 0.999071534 | Pcdhb5        | Pcdhb5        | PCDH84        | 1.122880537 | 1.067220799 | 0.605881983 | 1.179495811 | 1.111843547 | 2.692199976 | 0.776583522 | 0.690824524 | 0.628549241 | 0.392153787 |
| ENSMUSG000000005981 | -0.011175192 | 6.362680926  | 0.002516849 | 0.959988343 | 0.999071534 | Trap1         | Trap1         | TRAP1         | 100.9890683 | 93.08536972 | 79.23589934 | 76.94475616 | 78.61387904 | 109.1432423 | 106.068366  | 57.96017756 | 59.94788384 | 68.56155377 |

|                    |              |              |             |             |             |           |           |          |             |             |             |             |             |             |             |             |             |             |
|--------------------|--------------|--------------|-------------|-------------|-------------|-----------|-----------|----------|-------------|-------------|-------------|-------------|-------------|-------------|-------------|-------------|-------------|-------------|
| ENSMUSG00000030359 | -0.067425097 | -1.117777626 | 0.002506525 | 0.960070424 | 0.999071534 | Pzp       | Pzp       |          | 0.210540101 | 0.059290044 | 1.413724627 | 0           | 0.130805123 | 0.218286485 | 0.19414588  | 0           | 1.021392516 | 0           |
| ENSMUSG00000080885 | -0.055995903 | 0.461183608  | 0.002505065 | 0.960082047 | 0.999071534 | Rpl10-ps6 | Rpl10-ps6 |          | 1.333420637 | 2.608761954 | 1.750325729 | 0.277528426 | 0.588623054 | 0           | 2.718042326 | 0           | 0           | 3.137230296 |
| ENSMUSG00000028848 | -0.016258659 | 3.229237494  | 0.002489747 | 0.960204175 | 0.999071534 | Gpn2      | Gpn2      | GPN2     | 12.7727661  | 7.114805329 | 10.36731393 | 8.256470679 | 9.875786801 | 12.36956746 | 9.901439902 | 6.286503168 | 8.01400282  | 8.235229528 |
| ENSMUSG00000020629 | -0.010839044 | 4.859269411  | 0.002488011 | 0.960218044 | 0.999071534 | Adi1      | Adi1      | ADI1     | 31.08975486 | 29.52644211 | 31.03462158 | 25.53261521 | 33.74772178 | 33.10678349 | 31.32220204 | 30.81077377 | 19.09218319 | 26.01286787 |
| ENSMUSG00000015776 | -0.01652449  | 4.696970675  | 0.00246507  | 0.960401722 | 0.999071534 | Med22     | Med22     | MED22    | 34.80929664 | 35.92976691 | 18.64770103 | 18.0393477  | 28.25390661 | 48.9689347  | 35.46398083 | 15.05997462 | 8.956826681 | 22.74491965 |
| ENSMUSG00000044857 | 0.01111386   | 5.915240763  | 0.002462844 | 0.960419593 | 0.999071534 | Lemd2     | Lemd2     | LEMD2    | 71.44327415 | 82.17600155 | 50.9614068  | 42.46184921 | 66.2527949  | 83.09438846 | 64.78000877 | 61.55246508 | 37.00583655 | 51.76429989 |
| ENSMUSG00000032737 | 0.011674535  | 6.294623183  | 0.002459134 | 0.960449393 | 0.999071534 | Inppl1    | Inppl1    | INPPL1   | 84.84766055 | 101.7417162 | 69.13786629 | 53.56298626 | 98.56166033 | 119.83928   | 64.13285584 | 87.25113737 | 52.95527354 | 64.57465693 |
| ENSMUSG00000025283 | 0.015812948  | 8.972626594  | 0.002456835 | 0.960467867 | 0.999071534 | Sat1      | Sat1      | SAT1     | 532.8769947 | 564.6783829 | 503.0166864 | 553.530446  | 433.4227757 | 255.9045221 | 409.0653701 | 766.0553146 | 483.3543662 | 440.6501387 |
| ENSMUSG00000067377 | 0.016005864  | 4.051057712  | 0.00245287  | 0.960499755 | 0.999071534 | Tspan6    | Tspan6    | TSPAN6   | 16.91338808 | 15.77115181 | 15.07972936 | 23.86744465 | 12.62269439 | 21.82864846 | 27.24513855 | 9.326131073 | 9.506807267 | 13.92145944 |
| ENSMUSG00000048174 | 0.022136001  | 2.158737312  | 0.002452304 | 0.96050431  | 0.999071534 | Tmem81    | Tmem81    | TMEM81   | 5.333682549 | 3.201662398 | 4.914376085 | 5.203657991 | 3.597140888 | 3.492583753 | 1.941458804 | 3.868617334 | 5.028393926 | 6.209101628 |
| ENSMUSG00000034854 | -0.016216675 | 4.508764508  | 0.002449983 | 0.960522984 | 0.999071534 | Mfsd12    | Mfsd12    | MFSD12   | 35.09001677 | 26.97697021 | 19.25358302 | 13.94580342 | 23.87193498 | 43.36624827 | 30.80444797 | 12.29667653 | 10.99961171 | 16.92797181 |
| ENSMUSG00000042099 | 0.017186445  | 3.026109178  | 0.002441592 | 0.960590588 | 0.999071534 | Kank3     | Kank3     | KANK3    | 10.31646493 | 9.842147372 | 7.068623136 | 5.064893778 | 9.352566308 | 10.04117829 | 7.830550511 | 6.493750525 | 4.792687961 | 10.45743432 |
| ENSMUSG00000044519 | 0.028222298  | 1.774401483  | 0.002424485 | 0.960728788 | 0.999071534 | Zfp488    | Zfp488    | ZNF488   | 1.824680872 | 2.845922132 | 7.472544458 | 1.942698983 | 2.812310149 | 1.819054038 | 1.48845175  | 5.595678644 | 1.492804447 | 5.490153018 |
| ENSMUSG00000032285 | 0.014835911  | 3.489255694  | 0.002423384 | 0.960737692 | 0.999071534 | Dnaja4    | Dnaja4    | DNAJA4   | 13.26402634 | 13.28096995 | 11.2424768  | 9.089055958 | 10.59521498 | 12.95166475 | 12.81362811 | 7.599069763 | 9.192532646 | 11.56853672 |
| ENSMUSG00000035623 | -0.01356768  | 5.088742305  | 0.002422957 | 0.960741148 | 0.999071534 | Rsf1      | Rsf1      | RSF1     | 20.84346996 | 45.29759393 | 31.90978444 | 33.71970378 | 45.06236494 | 32.37916188 | 19.41458804 | 40.27506975 | 29.85608894 | 39.28073767 |
| ENSMUSG00000021180 | 0.019499294  | 2.297682094  | 0.002411365 | 0.960835104 | 0.999071534 | Rps6ka5   | Rps6ka5   | RPS6KA5  | 6.596293153 | 4.506043375 | 3.837252559 | 5.689332737 | 3.989556257 | 5.093351307 | 4.788931717 | 5.595678644 | 4.478413341 | 3.137230296 |
| ENSMUSG00000028573 | -0.046577012 | 0.185457369  | 0.002399643 | 0.96093033  | 0.999071534 | Fggy      | Fggy      | FGGY     | 0.842160403 | 1.600831199 | 2.01960661  | 0.138764213 | 0.654025616 | 3.856394561 | 0.970729402 | 0           | 0.15713731  | 0.392153787 |
| ENSMUSG00000001062 | 0.012479214  | 4.260763869  | 0.002390756 | 0.961002685 | 0.999071534 | Vps9d1    | Vps9d1    | VPS9D1   | 18.38716879 | 17.84630337 | 19.1862628  | 19.14946141 | 23.87193498 | 23.64770249 | 12.68419752 | 18.7213446  | 15.71373102 | 22.02597104 |
| ENSMUSG00000032594 | 0.012103297  | 6.238549387  | 0.002363546 | 0.961225066 | 0.999071534 | Ip6k1     | Ip6k1     | IP6K1    | 82.95279965 | 84.60689337 | 77.14897251 | 71.11665921 | 74.16650485 | 69.92443722 | 46.53029601 | 113.8478815 | 58.76935401 | 73.26739921 |
| ENSMUSG00000022193 | 0.012642328  | 7.082004736  | 0.002375262 | 0.961276612 | 0.999071534 | Psmb5     | Psmb5     | PSMB5    | 172.4323424 | 101.1488158 | 157.1253943 | 135.5032541 | 133.3558231 | 149.4534798 | 195.9579087 | 90.9815898  | 102.4535262 | 122.0905457 |
| ENSMUSG00000079677 | -0.011759604 | 4.428255612  | 0.00235169  | 0.961322362 | 0.999071534 | Fdx1l     | Fdx1l     | FDX2     | 24.63319177 | 20.87009563 | 26.92808814 | 22.06350988 | 16.87386089 | 25.24847005 | 20.25588686 | 21.83005496 | 14.29949523 | 22.35276586 |
| ENSMUSG00000020571 | 0.012696242  | 8.660774026  | 0.0023467   | 0.961363391 | 0.999071534 | Pdia6     | Pdia6     | PDIA6    | 416.0272388 | 413.7852199 | 400.9592324 | 432.8749628 | 425.4436632 | 458.9837149 | 570.7888885 | 295.8110612 | 289.6826313 | 366.0102012 |
| ENSMUSG00000028945 | 0.01100909   | 6.988584973  | 0.002343466 | 0.961389999 | 0.999071534 | Rheb      | Rheb      | RHEB     | 139.0266464 | 114.6076558 | 128.8509017 | 125.8591413 | 148.2676071 | 146.1064203 | 158.4230384 | 116.2657674 | 81.78996996 | 119.9336999 |
| ENSMUSG00000060459 | 0.045497657  | -0.022291166 | 0.002341043 | 0.96140995  | 0.999071534 | Knq2      | Knq2      | KNG1     | 2.596661241 | 0.652190488 | 0.740522424 | 0.069382107 | 0.327012808 | 0.727621615 | 2.135604685 | 0.552659619 | 0           | 0.849666539 |
| ENSMUSG00000029735 | 0.025433929  | 1.786269857  | 0.002337736 | 0.961437199 | 0.999071534 | Tpk1      | Tpk1      | TPK1     | 7.018003354 | 1.897281421 | 1.211763966 | 2.22022741  | 4.90519212  | 3.710870238 | 4.530070544 | 2.832380548 | 1.571373102 | 3.790819941 |
| ENSMUSG00000029524 | -0.019730989 | 2.880179926  | 0.002327581 | 0.961520977 | 0.999071534 | Sirt4     | Sirt4     | SIRT4    | 8.281243958 | 4.209593153 | 8.886269085 | 6.383153803 | 10.13739705 | 4.220205368 | 4.918362304 | 10.98410993 | 5.421237202 | 8.431306421 |
| ENSMUSG00000083097 | 0.023925216  | 5.724547203  | 0.002316554 | 0.961612164 | 0.999071534 | Gm14494   | Gm14494   |          | 104.0068097 | 65.57478911 | 19.65750434 | 36.07869541 | 48.72490839 | 58.86458867 | 138.037721  | 38.47892598 | 8.32827744  | 23.33315033 |
| ENSMUSG00000031904 | 0.013188998  | 5.03176303   | 0.002315607 | 0.961620005 | 0.999071534 | Slc7a6    | Slc7a6    | SLC7A6   | 36.70415754 | 36.64124744 | 28.40913298 | 36.28684173 | 30.08517833 | 51.51561036 | 45.88314308 | 15.61263424 | 25.29910694 | 23.72530412 |
| ENSMUSG00000030595 | -0.013215588 | 4.127155225  | 0.00231476  | 0.961627022 | 0.999071534 | Nfkbb     | Nfkbb     | NFKB1B   | 19.29950922 | 20.57364541 | 16.08953266 | 11.37866547 | 23.74112986 | 23.28389169 | 14.56094103 | 20.72473572 | 10.8424744  | 15.42471562 |
| ENSMUSG00000029672 | 0.011626583  | 6.66212892   | 0.002310074 | 0.961665853 | 0.999071534 | Fam3c     | Fam3c     | FAM3C    | 89.61990283 | 87.80855577 | 113.9058128 | 137.8622457 | 89.99392476 | 126.5333989 | 93.19002261 | 71.01676106 | 100.2536039 | 98.95347226 |
| ENSMUSG00000093677 | -0.024337837 | 1.473703143  | 0.002303851 | 0.961717479 | 0.999071534 | Gm20712   | Gm20712   |          | 2.17558104  | 2.668051998 | 5.520258068 | 1.110113705 | 2.419894779 | 2.619437815 | 2.135604685 | 2.625133191 | 1.885647722 | 3.398666154 |
| ENSMUSG00000025993 | -0.034626038 | 1.357500744  | 0.002291546 | 0.961819776 | 0.999071534 | Slc40a1   | Slc40a1   | SLC40A1  | 3.298461576 | 5.336103997 | 0.471241542 | 0.277528426 | 3.531738326 | 3.565345915 | 5.047792891 | 2.072473572 | 0.471411931 | 0.915025503 |
| ENSMUSG00000074582 | -0.011363931 | 4.654617288  | 0.002288117 | 0.961848324 | 0.999071534 | Arfgef2   | Arfgef2   | ARFGEF2  | 21.82599043 | 31.12727331 | 25.85096461 | 23.10424148 | 28.84252966 | 31.65154026 | 19.8028798  | 29.42912472 | 16.02800564 | 25.29391926 |
| ENSMUSG00000087385 | -0.032546902 | 0.128918076  | 0.00227821  | 0.961930946 | 0.999071534 | AA415398  | AA415398  | FRG2     | 1.473780704 | 0.830060622 | 0.942483085 | 0.693821065 | 1.111843547 | 0.9459081   | 0.906014109 | 1.657978857 | 0.15713731  | 0.980384468 |
| ENSMUSG00000013418 | -0.059778186 | -0.779505303 | 0.002258535 | 0.962095568 | 0.999071534 | B4galnt2  | B4galnt2  | B4GALNT2 | 0.491260235 | 1.719411288 | 0           | 0.138764213 | 0           | 0.582097292 | 0           | 0.138164905 | 0.235705965 | 1.176461361 |
| ENSMUSG00000020366 | -0.009687849 | 5.686323021  | 0.002257738 | 0.96210225  | 0.999071534 | Mapk9     | Mapk9     | MAPK9    | 54.17898589 | 61.54306609 | 57.55878839 | 39.82532916 | 55.39596967 | 67.95985886 | 44.20054545 | 47.5978097  | 36.29871866 | 54.83617122 |
| ENSMUSG00000048285 | 0.01130473   | 6.705200811  | 0.00225582  | 0.962118339 | 0.999071534 | Frmdd6    | Frmdd6    | FRMD6    | 96.77826625 | 148.0472409 | 105.4907853 | 73.33688662 | 117.9208186 | 143.9963177 | 97.72009315 | 117.0256744 | 69.92610304 | 85.55488454 |
| ENSMUSG00000053173 | -0.038884022 | 0.780636593  | 0.002251745 | 0.962152541 | 0.999071534 | Rpl18-ps2 | Rpl18-ps2 |          | 3.158101509 | 1.778701332 | 2.625488593 | 0.277528426 | 0.523220493 | 2.764962138 | 1.617882337 | 0.483577167 | 0           | 3.137230296 |
| ENSMUSG00000026173 | 0.043797532  | 0.088632852  | 0.002249609 | 0.962170486 | 0.999071534 | Plcd4     | Plcd4     | PLCD4    | 0.140360067 | 0.118580089 | 1.88496617  | 2.01208109  | 0.588623054 | 0.363810808 | 0.323576467 | 0.345412262 | 2.278490998 | 0.915025503 |

|                     |              |              |             |             |             |               |               |          |             |             |             |             |             |             |             |             |             |             |
|---------------------|--------------|--------------|-------------|-------------|-------------|---------------|---------------|----------|-------------|-------------|-------------|-------------|-------------|-------------|-------------|-------------|-------------|-------------|
| ENSMUSG00000029622  | -0.011529278 | 9.078326395  | 0.002244954 | 0.962209614 | 0.999071534 | Arpc1b        | Arpc1b        | ARPC1B   | 599.2673064 | 496.2576717 | 571.6833111 | 527.3733919 | 625.0522812 | 617.168654  | 576.8721261 | 469.9679236 | 413.9782437 | 536.1395858 |
| ENSMUSG00000009995  | 0.012292347  | 5.957703545  | 0.002225583 | 0.962372889 | 0.999071534 | Taz           | Taz           | TAZ      | 71.02219394 | 51.46375855 | 68.93590563 | 66.05176543 | 62.72105657 | 37.54527535 | 49.57191481 | 80.8264693  | 51.6196064  | 74.5745785  |
| ENSMUSG000000024750 | -0.01151208  | 6.865207996  | 0.002215093 | 0.962461603 | 0.999071534 | Zfand5        | Zfand5        | ZFAND5   | 105.5507704 | 117.8686083 | 117.002543  | 141.331351  | 123.0222184 | 94.80909646 | 98.69082256 | 150.7379111 | 99.07507408 | 108.3651631 |
| ENSMUSG00000089902  | 0.031129415  | 0.672789738  | 0.002202583 | 0.962567672 | 0.999071534 | Gm13625       | Gm13625       |          | 2.38612114  | 0.5336104   | 1.615685288 | 2.01208109  | 0.981038424 | 0.727621615 | 1.294305087 | 0.690824524 | 2.828471584 | 1.176461361 |
| ENSMUSG00000027001  | 0.01812608   | 3.283429308  | 0.002197802 | 0.962608291 | 0.999071534 | Dusp19        | Dusp19        | DUSP19   | 15.01852718 | 6.46261484  | 7.87646578  | 12.14186865 | 7.913709953 | 5.675448599 | 14.81980221 | 6.63191543  | 8.721120716 | 9.86920364  |
| ENSMUSG00000070305  | -0.026555892 | 1.791652974  | 0.002190872 | 0.962667246 | 0.999071534 | Mpd3          | Mpd3          | MPZL3    | 5.684582717 | 6.403324796 | 1.548365068 | 1.526406344 | 2.419894779 | 4.947826984 | 6.277383467 | 1.174401691 | 1.649941757 | 2.418281687 |
| ENSMUSG000000025746 | 0.037722305  | 0.201882282  | 0.002180515 | 0.962755528 | 0.999071534 | Il6           | Il6           | IL6      | 1.684320805 | 1.541541155 | 0.875162864 | 0.277528426 | 0.850233301 | 1.164194584 | 0.453007054 | 0.138164905 | 0.31427462  | 3.006512367 |
| ENSMUSG00000028330  | 0.012386954  | 5.82234186   | 0.002176905 | 0.962786351 | 0.999071534 | Ncbp1         | Ncbp1         | NCBP1    | 65.61833136 | 62.01738645 | 62.40584426 | 49.19191354 | 53.17228258 | 98.5199667  | 74.94030985 | 32.19242282 | 25.53481291 | 55.62047879 |
| ENSMUSG00000027940  | 0.014354074  | 8.826906153  | 0.00216402  | 0.962896567 | 0.999071534 | Tpm3          | Tpm3          |          | 606.1449497 | 564.737673  | 395.035053  | 377.5774238 | 410.0740612 | 815.2272577 | 606.4470152 | 245.7953656 | 280.882942  | 346.4025119 |
| ENSMUSG00000030019  | -0.012532431 | 5.197750931  | 0.002155523 | 0.962969433 | 0.999071534 | Fbxl14        | Fbxl14        | FBXL14   | 32.8442557  | 22.2930567  | 54.79865936 | 40.17223969 | 39.96096514 | 58.13696706 | 24.39766564 | 28.18564058 | 30.7989128  | 37.64676355 |
| ENSMUSG00000035585  | 0.009619685  | 6.27576197   | 0.002155422 | 0.962970301 | 0.999071534 | Tsen34        | Tsen34        | TSEN34   | 83.58441995 | 68.77176147 | 80.31302287 | 73.1287403  | 95.09532456 | 93.64490188 | 71.96340635 | 61.55246508 | 68.04045531 | 80.58760323 |
| ENSMUSG000000045482 | 0.01209524   | 6.383861584  | 0.002132278 | 0.963169499 | 0.999071534 | Trrap         | Trrap         | TRRAP    | 70.67129378 | 77.01776768 | 91.62281989 | 93.11078699 | 97.64602446 | 82.80333981 | 42.00022547 | 112.1208202 | 72.59743731 | 90.7836017  |
| ENSMUSG000000034573 | -0.012418004 | 4.608184028  | 0.002115439 | 0.963315113 | 0.999071534 | Ptpn13        | Ptpn13        | PTPN13   | 25.19463204 | 34.50680584 | 16.29149332 | 22.06350988 | 28.7771271  | 24.9574214  | 17.47312924 | 31.7779281  | 19.87786974 | 21.96061207 |
| ENSMUSG000000038759 | 0.011780271  | 5.775223393  | 0.002105097 | 0.963404828 | 0.999071534 | Nup205        | Nup205        | NUP205   | 60.49518891 | 52.94600966 | 51.36532812 | 61.05625376 | 56.24620297 | 108.124572  | 62.38554291 | 33.29774205 | 34.72734555 | 38.69250699 |
| ENSMUSG000000044060 | 0.016313933  | 3.18609552   | 0.002099616 | 0.96345247  | 0.999071534 | A830010M20Rik | A830010M20Rik | KIAA1107 | 10.52700503 | 6.106874574 | 6.799342255 | 11.79495811 | 10.92222779 | 8.294886414 | 6.083237587 | 10.0169556  | 9.349669957 | 9.019537102 |
| ENSMUSG000000021947 | 0.024856885  | 3.165899136  | 0.002097692 | 0.963469208 | 0.999071534 | Cryl1         | Cryl1         | CRYL1    | 12.07096577 | 8.537766395 | 7.674505119 | 9.921641237 | 7.194281776 | 17.68120525 | 19.73816451 | 3.661369977 | 0.864255206 | 4.379050622 |
| ENSMUSG000000019467 | 0.012401012  | 5.37213647   | 0.00209324  | 0.963507963 | 0.999071534 | Arhgef25      | Arhgef25      | ARHGEF25 | 44.3537812  | 46.54268486 | 42.47905904 | 34.89919959 | 45.71639056 | 35.28964834 | 21.29133155 | 57.40751794 | 29.14897104 | 55.68583776 |
| ENSMUSG000000024151 | -0.01117407  | 5.14696825   | 0.002089017 | 0.96354477  | 0.999071534 | Msh2          | Msh2          | MSH2     | 36.21289731 | 35.5147366  | 40.12285132 | 34.06661432 | 38.19509597 | 61.92059946 | 39.92933608 | 24.5242706  | 18.22792798 | 32.54876432 |
| ENSMUSG000000031592 | -0.010124651 | 6.105550549  | 0.002083704 | 0.963591124 | 0.999071534 | Pcm1          | Pcm1          | PCM1     | 57.47744747 | 82.70961195 | 65.50257439 | 66.67620439 | 86.06977106 | 83.53096143 | 55.97872886 | 81.79362363 | 43.05562299 | 70.65304063 |
| ENSMUSG000000040339 | -0.010960878 | 6.798142327  | 0.002072357 | 0.963690325 | 0.999071534 | Fam102b       | Fam102b       | FAM102B  | 101.0592483 | 164.6484533 | 82.13066882 | 107.8891757 | 124.3956722 | 112.4175396 | 126.7772599 | 115.7131078 | 85.01128482 | 94.57442164 |
| ENSMUSG000000057531 | 0.009270584  | 5.441907229  | 0.002063626 | 0.963766839 | 0.999071534 | Dtnbp1        | Dtnbp1        | DTNBP1   | 39.44117885 | 46.36481473 | 44.90258697 | 44.40454819 | 49.0519212  | 45.7673996  | 44.07111486 | 46.21616065 | 30.95605011 | 43.65978829 |
| ENSMUSG000000056458 | -0.020699692 | 1.871180433  | 0.002059075 | 0.96380679  | 0.999071534 | Stk30         | Mok           | MOK      | 2.666841275 | 2.96450222  | 5.116336746 | 2.636520049 | 5.101399804 | 2.037340523 | 3.624056435 | 3.592287524 | 2.985608894 | 4.313691657 |
| ENSMUSG000000031367 | -0.009966356 | 6.189521032  | 0.002051897 | 0.963869888 | 0.999071534 | Ap1s2         | Ap1s2         | AP1S2    | 60.42500888 | 62.37312672 | 82.19798904 | 83.88296682 | 89.66691195 | 73.63530746 | 70.28080872 | 80.20472723 | 55.23376453 | 70.91447649 |
| ENSMUSG000000028086 | 0.014463212  | 4.830032301  | 0.002047977 | 0.963904389 | 0.999071534 | Fbxw7         | Fbxw7         | FBXW7    | 20.56274983 | 18.37991377 | 43.0176208  | 35.17672802 | 28.12310149 | 24.66637276 | 14.23736457 | 28.04747567 | 33.86309035 | 32.67948225 |
| ENSMUSG000000021068 | -0.011149848 | 5.001224276  | 0.002038045 | 0.963991967 | 0.999071534 | Nin           | Nin           | NIN      | 24.0717515  | 32.01662398 | 32.91958775 | 40.44976812 | 35.97140888 | 48.6051239  | 21.42076214 | 27.56389851 | 29.93465759 | 27.58148302 |
| ENSMUSG000000037971 | 0.018544732  | 2.83501116   | 0.002030873 | 0.964055331 | 0.999071534 | 1110032A03Rik | 1110032A03Rik | C11orf1  | 5.824942784 | 5.632554219 | 6.462741153 | 11.23990126 | 6.605658721 | 5.020589145 | 4.335924663 | 10.84594503 | 4.635550651 | 8.823460208 |
| ENSMUSG000000037174 | 0.01077946   | 5.380163032  | 0.002019932 | 0.964152218 | 0.999071534 | Elf2          | Elf2          | ELF2     | 45.8275619  | 46.48339482 | 39.58428956 | 29.14048475 | 55.06895686 | 64.46727511 | 47.11273365 | 40.96589427 | 21.37067419 | 34.05202051 |
| ENSMUSG000000016758 | 0.023482747  | 1.397803364  | 0.002019877 | 0.964152708 | 0.999071534 | Bik           | Bik           | BIK      | 3.158101509 | 1.422961066 | 3.90457278  | 1.873316877 | 2.550699902 | 3.710870238 | 3.818202315 | 0.967154334 | 1.257098482 | 2.810435474 |
| ENSMUSG000000030768 | 0.015490971  | 3.399538152  | 0.002019575 | 0.964155384 | 0.999071534 | Disp1         | Disp1         | DISP1    | 7.088183388 | 11.02794826 | 10.03071283 | 10.33793388 | 15.36960198 | 14.1886215  | 9.966155196 | 10.84594503 | 4.16413872  | 12.94107497 |
| ENSMUSG000000019979 | -0.009451594 | 5.727612143  | 0.002017954 | 0.964169764 | 0.999071534 | Apaf1         | Apaf1         | APAF1    | 55.8633067  | 51.99736894 | 56.34702443 | 53.21607572 | 57.88126701 | 67.45052373 | 39.79990549 | 63.14136149 | 42.89848568 | 42.54868589 |
| ENSMUSG000000030446 | 0.023894444  | 1.024032705  | 0.002017742 | 0.964171649 | 0.999071534 | Zfp273        | Zfp273        |          | 1.403600671 | 1.778701332 | 1.817645949 | 2.567137942 | 2.158284533 | 1.309718907 | 2.9769035   | 2.556050739 | 0.942823861 | 1.437897219 |
| ENSMUSG000000040669 | 0.012159047  | 4.404386783  | 0.002015134 | 0.964194793 | 0.999071534 | Phc1          | Phc1          | PHC1     | 15.36942735 | 18.97281421 | 14.81044848 | 18.38625824 | 16.67765321 | 23.42941601 | 10.8721693  | 17.2706131  | 11.31388633 | 17.71227938 |
| ENSMUSG000000060601 | 0.009766883  | 5.614129079  | 0.002004266 | 0.964291413 | 0.999071534 | Nr1h2         | Nr1h2         | NR1H2    | 52.14376492 | 58.40069374 | 41.94049727 | 39.47841863 | 61.87082327 | 52.60704278 | 35.85227259 | 54.98963211 | 40.30572007 | 52.41788953 |
| ENSMUSG000000070705 | 0.028413498  | 0.999490169  | 0.001996165 | 0.964363601 | 0.999071534 | Eid2b         | Eid2b         | EID2B    | 0.140360067 | 2.668051998 | 3.096730136 | 3.18260024  | 2.354492217 | 2.983248622 | 1.164875283 | 2.279720929 | 1.571373102 | 1.241820326 |
| ENSMUSG000000036452 | -0.017538548 | 2.691140019  | 0.001994088 | 0.964382134 | 0.999071534 | Arhgap26      | Arhgap26      | ARHGAP26 | 6.246022985 | 9.842147372 | 8.549667983 | 3.677251647 | 4.839789558 | 7.203453991 | 4.659501131 | 5.802926001 | 6.992610304 | 5.359435089 |
| ENSMUSG000000025245 | -0.01132893  | 4.534645595  | 0.001971489 | 0.964584403 | 0.999071534 | Lztf11        | Lztf11        | LZTFL1   | 23.8612114  | 19.38784452 | 24.5045602  | 31.08318373 | 20.53640434 | 23.13836736 | 26.7921315  | 22.38271458 | 19.79930108 | 18.16979213 |
| ENSMUSG000000063765 | 0.021499333  | 1.285123486  | 0.001959203 | 0.96469486  | 0.999071534 | Chadl         | Chadl         | CHADL    | 2.315941107 | 1.837991377 | 1.548365068 | 3.122194795 | 3.008517833 | 3.492583753 | 2.200319978 | 2.486968286 | 1.728510412 | 1.503256184 |
| ENSMUSG000000020719 | -0.011096024 | 9.501713522  | 0.001954037 | 0.964741402 | 0.999071534 | Ddx5          | Ddx5          | DDX5     | 806.3685854 | 850.6935572 | 639.7440539 | 685.9808874 | 801.7700026 | 952.6749808 | 736.6541857 | 554.8702576 | 515.1746715 | 783.1311127 |
| ENSMUSG000000069184 | 0.037934225  | -0.392225557 | 0.001951536 | 0.964763955 | 0.999071534 | Zfp72         | Zfp72         |          | 0.350900168 | 0.830060622 | 1.077123525 | 0.346910533 | 0.588623054 | 0.727621615 | 0.906014109 | 1.243484143 | 0           | 0.261435858 |

|                      |              |              |             |             |             |          |          |              |             |             |             |             |             |             |             |             |             |             |
|----------------------|--------------|--------------|-------------|-------------|-------------|----------|----------|--------------|-------------|-------------|-------------|-------------|-------------|-------------|-------------|-------------|-------------|-------------|
| ENSMUSG00000005986   | 0.021231628  | 1.55162507   | 0.001947573 | 0.964799728 | 0.999071534 | Ankrd13d | Ankrd13d | ANKRD13D     | 3.579181711 | 2.490181865 | 2.760129034 | 2.01208109  | 3.662543449 | 3.492583753 | 1.100159989 | 2.694215643 | 2.828471584 | 3.464025119 |
| ENSMUSG000000022019  | 0.011357838  | 4.773337352  | 0.00193555  | 0.964908476 | 0.999071534 | Tdrd3    | Tdrd3    | TDRD3        | 20.35220973 | 28.5778014  | 34.40063259 | 27.12840366 | 30.01977577 | 24.08427546 | 20.51474803 | 26.32041436 | 30.72034414 | 27.18932923 |
| ENSMUSG000000024831  | -0.015142047 | 2.93157039   | 0.001933324 | 0.964928651 | 0.999071534 | Ighmbp2  | Ighmbp2  | IGHMBP2      | 10.456825   | 9.427117061 | 6.530061373 | 6.175007483 | 6.671061283 | 11.05984855 | 6.795105815 | 6.839162787 | 5.421237202 | 6.601255415 |
| ENSMUSG000000041079  | -0.019826489 | 2.386006055  | 0.001928668 | 0.964970878 | 0.999071534 | Rwdd2b   | Rwdd2b   | RWDD2B       | 6.73728322  | 7.944865951 | 3.702612119 | 3.538487434 | 4.839789558 | 8.949745867 | 8.283557565 | 2.625133191 | 2.514196963 | 3.137230296 |
| ENSMUSG000000013973  | -0.010890802 | 4.786799712  | 0.001922529 | 0.965026641 | 0.999071534 | Dedd     | Dedd     | DEDD         | 31.72137516 | 32.78739456 | 23.76403778 | 22.89609516 | 32.57047567 | 28.37724299 | 20.19117157 | 32.81416489 | 17.04939816 | 34.50953326 |
| ENSMUSG00000042216   | -0.028863991 | 0.327220895  | 0.001912693 | 0.965116158 | 0.999071534 | Sgsml    | Sgsml    | SGSM1        | 1.894860906 | 1.304380977 | 0.471241542 | 1.040731598 | 1.177246109 | 1.091432423 | 0.711868228 | 1.796143762 | 0.31427462  | 1.503256184 |
| ENSMUSG000000034800  | 0.024579519  | 1.122447584  | 0.001908448 | 0.965154868 | 0.999071534 | Zfp661   | Zfp661   | ZNF2         | 0.98252047  | 1.600831199 | 3.164050356 | 2.844666369 | 1.831271725 | 1.746291877 | 0.970729402 | 3.315957715 | 1.099961171 | 2.810435474 |
| ENSMUSG000000017734  | 0.010083364  | 5.151758011  | 0.001907736 | 0.965161367 | 0.999071534 | Dbndd2   | Dbndd2   | DBNDD2       | 48.00314294 | 30.41579278 | 41.26729507 | 29.55677739 | 34.53255252 | 40.31023748 | 45.6242819  | 27.84022831 | 23.64916518 | 36.14350737 |
| ENSMUSG000000055629  | -0.023507838 | 1.750680139  | 0.001906237 | 0.965175049 | 0.999071534 | B4galnt4 | B4galnt4 | B4GALNT4     | 1.543960738 | 3.616692709 | 4.173853661 | 3.399723221 | 4.120361381 | 7.567264798 | 4.012348196 | 0.898071881 | 2.199922343 | 1.699333077 |
| ENSMUSG000000020838  | 0.028285133  | 0.844452706  | 0.001896424 | 0.965264746 | 0.999071534 | Slc6a4   | Slc6a4   | SLC6A4       | 3.438821644 | 1.067220799 | 0.269280881 | 1.110113705 | 2.746907587 | 1.964578361 | 2.78275762  | 1.657978857 | 0.628549241 | 1.241820326 |
| ENSMUSG000000030986  | 0.01479494   | 3.649296445  | 0.001887388 | 0.965347543 | 0.999071534 | Dhx32    | Dhx32    | DHX32        | 13.12366627 | 16.12689208 | 12.31960032 | 7.076974868 | 15.95822503 | 21.61036197 | 16.30825396 | 7.322739954 | 9.113963991 | 7.843075741 |
| ENSMUSG000000003119  | -0.013518563 | 4.100877532  | 0.001886642 | 0.965354385 | 0.999071534 | Cdk12    | Cdk12    | CDK12        | 14.45708691 | 29.76360229 | 14.54116759 | 9.574730704 | 21.1250274  | 24.9574214  | 11.84289871 | 17.20153065 | 12.2567102  | 17.1240487  |
| ENSMUSG000000019732  | 0.037226342  | -0.013788527 | 0.00186885  | 0.96551803  | 0.999071534 | Calr3    | Calr3    | CALR3        | 0.842160403 | 1.541541155 | 0.673202203 | 0.971349492 | 0.39241537  | 0.727621615 | 0.970729402 | 0.483577167 | 1.807079067 | 0           |
| ENSMUSG000000067847  | 0.012229029  | 6.674656829  | 0.001854366 | 0.965651836 | 0.999071534 | Romo1    | Romo1    | ROMO1        | 129.8330621 | 60.06081498 | 121.5129977 | 132.5198235 | 80.44515076 | 72.25282639 | 94.16075201 | 93.81397035 | 94.91093536 | 129.6068266 |
| ENSMUSG000000063412  | 0.013905605  | 6.845147411  | 0.001853199 | 0.965662631 | 0.999071534 | Gm10131  | Gm10131  | ERH          | 160.0104765 | 77.78853826 | 123.2633234 | 127.3161655 | 104.0554755 | 152.5094906 | 214.5311979 | 62.93411413 | 51.69817505 | 93.98619096 |
| ENSMUSG000000028138  | -0.009296897 | 6.825720079  | 0.001847627 | 0.965714262 | 0.999071534 | Adh5     | Adh5     | ADH5         | 127.0258607 | 110.753803  | 121.3110371 | 118.0883453 | 112.4924059 | 118.456799  | 106.1330813 | 95.3337843  | 100.1750352 | 122.9402122 |
| ENSMUSG000000083623  | 0.050874662  | -0.741784191 | 0.001845007 | 0.96573857  | 0.999071534 | Gm7224   | Gm7224   |              | 0.701800335 | 1.185800888 | 0           | 0           | 0.457817931 | 0.800383777 | 0.453007054 | 0.069082452 | 0           | 1.045743432 |
| ENSMUSG000000039536  | 0.009599484  | 5.738521362  | 0.001844294 | 0.965745185 | 0.999071534 | Stau1    | Stau1    | STAU1        | 44.9854015  | 66.16768956 | 55.80846266 | 45.30651558 | 63.96370524 | 57.19105896 | 42.6473784  | 69.49694711 | 35.35589479 | 54.57473536 |
| ENSMUSG000000030750  | -0.012230567 | 5.868685718  | 0.001838433 | 0.965799624 | 0.999071534 | Nsmce1   | Nsmce1   | NSMCE1       | 96.91862632 | 47.01700521 | 48.47055865 | 61.81945694 | 49.96755706 | 66.28632915 | 98.82025314 | 35.37021563 | 37.00583655 | 47.12381341 |
| ENSMUSG0000000031985 | 0.009850042  | 5.781962372  | 0.001835797 | 0.965824134 | 0.999071534 | Gnpat    | Gnpat    | GNPAT        | 67.3728322  | 56.2069621  | 48.20127776 | 53.70175047 | 58.99311056 | 84.76791817 | 72.09283694 | 40.75864691 | 31.03461876 | 46.01271101 |
| ENSMUSG000000029816  | -0.024002527 | 2.419386477  | 0.001823902 | 0.965934966 | 0.999071534 | Gpnmb    | Gpnmb    | GPNMB        | 2.17558104  | 7.055515284 | 2.490848153 | 4.093544286 | 11.70705853 | 1.600767553 | 2.588611739 | 8.497141644 | 6.521198373 | 4.379050622 |
| ENSMUSG000000064307  | -0.021781011 | 1.345781694  | 0.001822581 | 0.965947296 | 0.999071534 | Lrrc51   | Lrrc51   |              | 2.807201342 | 2.96450222  | 1.211763966 | 2.983430582 | 2.616102464 | 2.328389169 | 1.164875283 | 3.385040167 | 2.514196963 | 1.960768935 |
| ENSMUSG000000023961  | -0.013068192 | 3.61869686   | 0.00181909  | 0.965979907 | 0.999071534 | Enpp4    | Enpp4    | ENPP4        | 12.28150587 | 11.20581839 | 10.36731393 | 15.74973819 | 13.53833025 | 19.57302145 | 13.59021163 | 7.737234668 | 9.035395336 | 9.999921569 |
| ENSMUSG000000020946  | 0.009729103  | 6.000656288  | 0.001794299 | 0.966212381 | 0.999071534 | Gosr2    | Gosr2    | RP11-156P1.2 | 81.19829881 | 80.87162057 | 60.18427699 | 45.5146619  | 64.61773086 | 93.86318836 | 64.39171701 | 43.31469765 | 56.41229436 | 55.81655569 |
| ENSMUSG000000032187  | 0.010769269  | 6.531539451  | 0.001777281 | 0.966372892 | 0.999071534 | Smarca4  | Smarca4  | SMARCA4      | 81.33865887 | 79.38936946 | 118.0123463 | 102.893664  | 94.63750663 | 134.4644745 | 49.31305363 | 77.02693442 | 83.59704902 | 107.7769325 |
| ENSMUSG0000000038209 | 0.049789063  | -0.99772681  | 0.001776373 | 0.966381477 | 0.999071534 | Itln1    | Itln1    | ITLN1        | 0.350900168 | 0.177870133 | 0           | 1.110113705 | 0.261610246 | 0.291048646 | 0.129430587 | 0.27632981  | 1.021392516 | 0           |
| ENSMUSG000000024246  | 0.018820337  | 1.815577084  | 0.001772981 | 0.96641357  | 0.999071534 | Thumpd2  | Thumpd2  | THUMPD2      | 3.158101509 | 3.320242487 | 4.106533441 | 3.399723221 | 3.466335765 | 2.40115133  | 2.459181152 | 4.697606763 | 3.535589479 | 2.941153403 |
| ENSMUSG000000074406  | -0.014512803 | 2.910179442  | 0.001765988 | 0.966479833 | 0.999071534 | Zfp628   | Zfp628   | ZNF628       | 9.333944461 | 7.52983564  | 5.654898509 | 8.395234892 | 7.586697145 | 9.022508029 | 5.630230533 | 6.217420715 | 6.049786443 | 8.758101244 |
| ENSMUSG000000030557  | 0.009009585  | 6.103763165  | 0.001757666 | 0.966558859 | 0.999071534 | Mef2a    | Mef2a    | MEF2A        | 55.16150636 | 80.5158803  | 69.33982695 | 79.37312989 | 69.71913066 | 95.39119376 | 62.83854997 | 65.14475261 | 55.94088243 | 57.12373498 |
| ENSMUSG000000075245  | -0.026568231 | 0.481665707  | 0.00174953  | 0.966636306 | 0.999071534 | Gm6043   | Gm6043   |              | 0.561440268 | 1.600831199 | 2.423527932 | 0.763203172 | 1.24264867  | 1.8918162   | 1.876743511 | 1.036236786 | 0.392843275 | 1.045743432 |
| ENSMUSG000000046434  | 0.010920124  | 9.515964444  | 0.001748273 | 0.96664829  | 0.999071534 | Hnrrnpa1 | Hnrrnpa1 | HNRNPA1      | 603.4079284 | 679.7010691 | 876.9805104 | 686.7440906 | 941.9276921 | 981.8526076 | 806.417272  | 593.9709257 | 472.6690291 | 765.0920385 |
| ENSMUSG000000054474  | -0.027246229 | 0.420740243  | 0.001731454 | 0.96680901  | 0.999071534 | Thns12   | Thns12   | THNSL2       | 1.894860906 | 0.592900444 | 1.009803305 | 1.179495811 | 1.700466601 | 1.382481069 | 0.841298815 | 0.414494714 | 2.121353688 | 0.849666539 |
| ENSMUSG000000022312  | 0.011507622  | 8.862309714  | 0.001719914 | 0.966919741 | 0.999071534 | Elf3h    | Elf3h    | EIF3H        | 505.5067816 | 545.8834389 | 403.5174007 | 470.2025361 | 481.8860738 | 353.2602942 | 639.7753913 | 510.4502407 | 342.5593362 | 390.1276591 |
| ENSMUSG0000000002524 | -0.009498897 | 7.309023668  | 0.001702621 | 0.96708637  | 0.999071534 | Puf60    | Puf60    | PUF60        | 160.2210166 | 142.889007  | 183.7842015 | 155.0690081 | 183.5849904 | 186.7804686 | 157.3228784 | 139.5465538 | 122.9599452 | 160.8484116 |
| ENSMUSG0000000035572 | -0.010990669 | 4.51177829   | 0.001702233 | 0.967090116 | 0.999071534 | Dcaf10   | Dcaf10   | DCAF10       | 25.75607231 | 32.01662398 | 20.59998742 | 18.45564034 | 21.77905301 | 27.43133489 | 33.26366085 | 19.89574629 | 13.27810271 | 17.18940766 |
| ENSMUSG0000000056515 | 0.010386427  | 7.187104744  | 0.00169708  | 0.967139941 | 0.999071534 | Rab31    | Rab31    | RAB31        | 165.5546991 | 175.7356916 | 131.2071094 | 127.0386371 | 155.7889017 | 188.1629497 | 203.0118756 | 127.8025369 | 96.63944577 | 102.2214205 |
| ENSMUSG000000030064  | -0.014206627 | 3.686555524  | 0.001694219 | 0.967167629 | 0.999071534 | Frm4b    | Frm4b    | FRMD4B       | 17.47482835 | 13.93316044 | 11.71371834 | 9.782877023 | 13.93074562 | 24.73913492 | 13.39606575 | 6.493750525 | 5.421237202 | 14.57504908 |
| ENSMUSG000000030314  | 0.009614348  | 5.185809112  | 0.001693822 | 0.967171747 | 0.999071534 | Atg7     | Atg7     | ATG7         | 30.17741442 | 35.63331669 | 47.19147446 | 34.13599642 | 40.41878307 | 41.54719423 | 23.62108212 | 36.47553486 | 34.25593362 | 38.95394284 |
| ENSMUSG000000043496  | 0.026458661  | 1.008979354  | 0.001684249 | 0.967264324 | 0.999071534 | Tril     | Tril     | TRIL         | 2.877381375 | 1.600831199 | 2.692808814 | 0.763203172 | 1.831271725 | 3.492583753 | 0.970729402 | 0.207247357 | 2.671334273 | 1.895409971 |

|                     |              |              |             |             |             |               |               |          |             |             |             |             |             |             |             |             |             |             |
|---------------------|--------------|--------------|-------------|-------------|-------------|---------------|---------------|----------|-------------|-------------|-------------|-------------|-------------|-------------|-------------|-------------|-------------|-------------|
| ENSMUSG00000024807  | 0.008963388  | 5.678534272  | 0.001683815 | 0.967268539 | 0.999071534 | Syvn1         | Syvn1         | SYVN1    | 52.70520519 | 51.10801828 | 47.39343512 | 54.18742521 | 58.86230544 | 51.4428482  | 37.14657846 | 44.76542915 | 48.00544826 | 63.85570832 |
| ENSMUSG00000043398  | 0.032943081  | -0.038087919 | 0.001679747 | 0.967308081 | 0.999071534 | Gpr135        | Gpr135        | GPRI35   | 1.965040939 | 0.830060622 | 0.336601102 | 0.138764213 | 1.111843547 | 0.800383777 | 0.453007054 | 1.934308667 | 0.392843275 | 0.522871716 |
| ENSMUSG000000035247 | -0.009209765 | 6.157260286  | 0.001668334 | 0.967419266 | 0.999071534 | Hectd1        | Hectd1        | HECTD1   | 77.26821693 | 82.23529159 | 63.81956888 | 73.40626873 | 74.36271253 | 114.6731666 | 46.85387248 | 62.45053696 | 54.44807798 | 72.41773267 |
| ENSMUSG000000019790 | -0.0091371   | 5.258469314  | 0.001661198 | 0.967488898 | 0.999071534 | Stxbp5        | Stxbp5        | STXBP5   | 36.49361744 | 41.08800077 | 31.70782378 | 40.44976812 | 48.98651864 | 42.49310233 | 29.57488912 | 47.39056234 | 28.36328449 | 36.2742253  |
| ENSMUSG000000038151 | -0.020525687 | 4.365858228  | 0.00165209  | 0.967578184 | 0.999071534 | Prdm1         | Prdm1         | PRDM1    | 15.93086761 | 44.94185366 | 15.34901024 | 8.880909638 | 23.02170168 | 8.804221544 | 9.189571674 | 54.22972513 | 7.6997282   | 16.73189491 |
| ENSMUSG000000053333 | -0.011914645 | 3.698640115  | 0.001633065 | 0.967765304 | 0.999071534 | Dis3l2        | Dis3l2        | DIS3L2   | 15.36942735 | 14.34819075 | 8.818948865 | 14.50086027 | 13.93074562 | 15.20729176 | 9.254286968 | 11.605852   | 9.899650542 | 16.2090232  |
| ENSMUSG000000034254 | 0.008505808  | 5.983712412  | 0.001633033 | 0.967765614 | 0.999071534 | Agpat1        | Agpat1        | AGPAT1   | 65.47797129 | 76.42486724 | 64.56009131 | 46.13910086 | 75.86697145 | 84.98620466 | 53.84312417 | 62.51961942 | 50.44107657 | 57.31981187 |
| ENSMUSG000000032060 | 0.011361404  | 5.872409764  | 0.001631341 | 0.967782316 | 0.999071534 | Cryab         | Cryab         | CRYAB    | 35.58127701 | 74.764746   | 60.85747919 | 53.49360415 | 77.89445086 | 36.45384292 | 45.23599014 | 80.06656232 | 52.24815564 | 62.28709317 |
| ENSMUSG000000003752 | -0.01149723  | 4.120933651  | 0.001629131 | 0.967804133 | 0.999071534 | Itpkc         | Itpkc         | ITPKC    | 17.19410822 | 20.6922255  | 16.5607742  | 20.81463196 | 14.38856355 | 19.79130793 | 10.09558578 | 22.31363212 | 12.49241616 | 18.69266385 |
| ENSMUSG000000038910 | -0.011082484 | 4.167123334  | 0.001619952 | 0.967894908 | 0.999071534 | Plcl2         | Plcl2         | PLCL2    | 24.21211157 | 13.10309981 | 19.859465   | 18.87193298 | 16.87386089 | 26.19437815 | 14.75508691 | 15.12905707 | 10.52819978 | 21.43774036 |
| ENSMUSG000000064065 | 0.028635848  | 0.368490472  | 0.001615654 | 0.967937509 | 0.999071534 | Ipcef1        | Ipcef1        | IPCEF1   | 1.894860906 | 1.422961066 | 0.269280881 | 1.387642131 | 0.981038424 | 1.964578361 | 0.258861174 | 0.483577167 | 1.257098482 | 1.764692042 |
| ENSMUSG000000021720 | 0.047130918  | -0.068095571 | 0.001599353 | 0.96809957  | 0.999071534 | Rnf180        | Rnf180        | RNF180   | 1.403600671 | 1.660121243 | 0.134640441 | 0           | 0.981038424 | 2.764962138 | 1.48845175  | 0.207247357 | 0           | 0           |
| ENSMUSG000000025731 | -0.012446892 | 3.343120217  | 0.001592048 | 0.968172476 | 0.999071534 | O610011F06Rik | O610011F06Rik | C16orf13 | 9.544484562 | 11.50226861 | 10.63659481 | 9.089055958 | 11.51085084 | 8.003837767 | 10.8721693  | 8.566224097 | 7.778296855 | 12.54892118 |
| ENSMUSG000000010047 | 0.008499481  | 5.104332329  | 0.001591479 | 0.968178158 | 0.999071534 | Hyal2         | Hyal2         | HYAL2    | 40.63423942 | 36.93769767 | 30.29409915 | 34.9685817  | 34.66335765 | 42.78415098 | 37.79373139 | 33.2286596  | 21.37067419 | 33.46378983 |
| ENSMUSG000000018326 | 0.010521366  | 8.237137356  | 0.001583549 | 0.968257496 | 0.999071534 | Ywhab         | Ywhab         | YWHAB    | 267.3859278 | 249.9075372 | 411.5958272 | 312.1500974 | 315.7635674 | 328.1573485 | 260.7379174 | 294.1530823 | 270.6690168 | 301.5662622 |
| ENSMUSG000000029919 | -0.01468255  | 3.482750267  | 0.001582542 | 0.968267582 | 0.999071534 | Hpgds         | Hpgds         | HPGDS    | 10.17610486 | 8.774926572 | 11.98299922 | 12.14186865 | 14.51936867 | 20.95550252 | 15.72581632 | 6.977327692 | 4.085570065 | 8.300588492 |
| ENSMUSG000000028927 | 0.012716278  | 3.938569926  | 0.001570986 | 0.968383594 | 0.999071534 | Padl2         | Padl2         | PADI2    | 19.93112953 | 16.30476221 | 12.92548231 | 14.01518552 | 15.56580966 | 23.57494033 | 6.083237587 | 12.9184186  | 14.77090716 | 17.1240487  |
| ENSMUSG000000038893 | -0.019179526 | 1.622731752  | 0.001569388 | 0.968399671 | 0.999071534 | Fam117a       | Fam117a       | FAM117A  | 2.035220973 | 1.956571465 | 3.769932339 | 3.538487434 | 4.054958819 | 3.34705943  | 1.423736457 | 2.486968286 | 3.378452169 | 3.33330719  |
| ENSMUSG000000030165 | -0.019512321 | 2.088049603  | 0.001566933 | 0.968424382 | 0.999071534 | Klrd1         | Klrd1         | KLRD1    | 8.000523824 | 4.98036373  | 3.029409915 | 2.428373729 | 3.27012808  | 3.274297269 | 2.070889391 | 3.039627905 | 3.221314859 | 7.97379367  |
| ENSMUSG000000000787 | -0.010738326 | 8.287046624  | 0.001563882 | 0.968455124 | 0.999071534 | Ddx3x         | Ddx3x         | DDX3X    | 238.8226541 | 379.3969942 | 139.8383668 | 305.6281793 | 384.0438417 | 513.1187631 | 272.6455314 | 247.7987567 | 229.0276296 | 280.3245988 |
| ENSMUSG000000024869 | 0.011982742  | 3.775087412  | 0.001551893 | 0.968576201 | 0.999071534 | Nudt8         | Nudt8         | NUDT8    | 16.49230788 | 12.80664959 | 18.31109993 | 7.770795933 | 15.17339429 | 15.93491337 | 14.62565633 | 11.605852   | 7.778296855 | 16.86261284 |
| ENSMUSG000000043614 | -0.018131433 | 2.80665355   | 0.001550556 | 0.968589734 | 0.999071534 | Vps37d        | Vps37d        | VPS37D   | 7.509263589 | 6.344034752 | 6.126140051 | 7.978942253 | 7.848307392 | 3.419821592 | 2.006174098 | 11.05319238 | 5.499805857 | 10.06528053 |
| ENSMUSG000000049670 | 0.013907937  | 3.161193767  | 0.00155041  | 0.968591219 | 0.999071534 | Morn4         | Morn4         | MORN4    | 8.281243958 | 8.419186306 | 11.2424768  | 6.03624327  | 11.77246109 | 9.604605321 | 7.506974044 | 11.12227484 | 4.16413872  | 10.98030604 |
| ENSMUSG000000044250 | -0.014473825 | 3.705667789  | 0.001536052 | 0.96873691  | 0.999071534 | Pced1b        | Pced1b        | PCED1B   | 12.98330621 | 8.122736084 | 14.40652715 | 15.8885024  | 15.76201734 | 9.895653967 | 5.112508185 | 13.95465538 | 11.31388633 | 20.71879175 |
| ENSMUSG000000044424 | -0.032682285 | 1.521801113  | 0.001522837 | 0.968871612 | 0.999071534 | Gm9493        | Gm9493        |          | 6.947823321 | 3.320242487 | 2.558168373 | 0.346910533 | 1.373453794 | 0.582097292 | 3.494625848 | 1.934308667 | 0           | 7.124127131 |
| ENSMUSG000000022561 | -0.009884557 | 5.414917917  | 0.001511892 | 0.968983625 | 0.999071534 | Gpaa1         | Gpaa1         | GPAA1    | 59.23194831 | 38.95355918 | 37.02612119 | 46.48601139 | 39.83016001 | 71.16139397 | 48.40703952 | 23.55711627 | 28.04900987 | 40.45719903 |
| ENSMUSG000000039046 | -0.009022337 | 4.830748036  | 0.001507642 | 0.969027225 | 0.999071534 | Usp6nl        | Usp6nl        | USP6NL   | 23.58049127 | 28.75567154 | 28.1398521  | 36.70313436 | 29.56195784 | 36.16279428 | 25.10953387 | 24.93876531 | 26.16336215 | 24.3135348  |
| ENSMUSG000000030551 | 0.013282761  | 6.336542599  | 0.001505548 | 0.969048739 | 0.999071534 | Nr2f2         | Nr2f2         | NR2F2    | 57.26690737 | 48.85499659 | 118.2816271 | 106.2933872 | 83.06125323 | 74.29016691 | 31.90463969 | 65.07567016 | 104.339174  | 103.6593177 |
| ENSMUSG000000029642 | 0.010604562  | 7.709232356  | 0.001499507 | 0.969110858 | 0.999071534 | Polr1d        | Polr1d        | POLR1D   | 244.787957  | 164.0555529 | 229.2253503 | 254.2160384 | 185.1546519 | 153.5281608 | 255.6901245 | 191.7038054 | 171.6725114 | 227.8413503 |
| ENSMUSG000000024952 | 0.008548386  | 6.079215195  | 0.001496065 | 0.969146318 | 0.999071534 | Rps6ka4       | Rps6ka4       | RPS6KA4  | 83.65459998 | 63.73679774 | 82.33262948 | 54.39557153 | 66.18739234 | 108.124572  | 63.93870996 | 53.46981815 | 48.16258558 | 61.76422146 |
| ENSMUSG000000019487 | -0.00805594  | 6.106542926  | 0.001492565 | 0.969182411 | 0.999071534 | Trip10        | Trip10        | TRIP10   | 74.25047549 | 64.80401854 | 83.00583168 | 59.18293689 | 77.56743805 | 78.36484796 | 61.73838998 | 78.68491328 | 47.92687961 | 66.73150276 |
| ENSMUSG000000082436 | -0.031605681 | -0.586457219 | 0.001488601 | 0.969223343 | 0.999071534 | Gm11688       | Gm11688       |          | 0.421080201 | 1.007930755 | 0.538561763 | 0.485674746 | 0.327012808 | 0.363810808 | 0.388291761 | 1.243484143 | 0.31427462  | 0.196076894 |
| ENSMUSG000000044229 | 0.02910189   | 0.481157282  | 0.001488413 | 0.969225281 | 0.999071534 | Nxpe4         | Nxpe4         | NXPE4    | 1.122880537 | 0.830060622 | 1.817645949 | 1.734552664 | 0.915635862 | 0.727621615 | 0.323576467 | 0.483577167 | 0.392843275 | 4.248332693 |
| ENSMUSG000000081603 | -0.010016349 | 7.868938884  | 0.001485763 | 0.969252674 | 0.999071534 | Gm14681       | Gm14681       |          | 238.6822941 | 191.9811638 | 295.6704077 | 222.5777978 | 268.7391256 | 258.5239599 | 293.0308489 | 235.1566679 | 139.5379315 | 212.1551988 |
| ENSMUSG000000028911 | -0.009667268 | 5.964716431  | 0.00148429  | 0.969267917 | 0.999071534 | Srsf4         | Srsf4         | SRSF4    | 50.31908405 | 50.10008752 | 93.30582539 | 66.46805807 | 63.37508219 | 71.37968045 | 41.02949607 | 52.36449891 | 55.31233319 | 79.5418598  |
| ENSMUSG000000027998 | 0.008226431  | 6.068490163  | 0.001482549 | 0.969285941 | 0.999071534 | Plrg1         | Plrg1         | PLRG1    | 74.39083555 | 53.06458974 | 73.24439973 | 73.54503294 | 71.94281776 | 76.18198311 | 62.12668174 | 52.91715853 | 61.12641367 | 71.4373482  |
| ENSMUSG000000027739 | -0.009168028 | 4.744205779  | 0.001476307 | 0.969350625 | 0.999071534 | Rab33b        | Rab33b        | RAB33B   | 29.54579412 | 26.91768016 | 25.51436351 | 28.93233843 | 27.79608868 | 28.15895651 | 24.65652682 | 27.77114586 | 27.65616659 | 18.49658695 |
| ENSMUSG000000097820 | 0.019854333  | 1.279713116  | 0.0014648   | 0.969470248 | 0.999071534 | E530011L22Rik | E530011L22Rik |          | 1.263240604 | 2.01586151  | 2.490848153 | 3.469105327 | 2.485297341 | 1.8918162   | 1.48845175  | 2.763298096 | 1.335667137 | 3.660102012 |
| ENSMUSG000000040035 | 0.022226983  | 0.748685251  | 0.001457335 | 0.969548107 | 0.999071534 | Disp2         | Disp2         | DISP2    | 1.333420637 | 3.201662398 | 0.942483085 | 0.763203172 | 1.765869163 | 2.037340523 | 0.970729402 | 1.381649048 | 1.571373102 | 1.568615148 |

|                     |              |              |             |             |             |          |            |          |             |             |             |             |             |             |             |             |             |             |
|---------------------|--------------|--------------|-------------|-------------|-------------|----------|------------|----------|-------------|-------------|-------------|-------------|-------------|-------------|-------------|-------------|-------------|-------------|
| ENSMUSG00000039782  | -0.011841628 | 4.043037917  | 0.00145228  | 0.969600941 | 0.999071534 | Cpeb2    | Cpeb2      | CPEB2    | 13.19384631 | 25.90974941 | 16.15685288 | 12.14186865 | 18.11650956 | 17.89949173 | 10.61330813 | 21.7609725  | 16.02800564 | 11.50317775 |
| ENSMUSG00000005804  | -0.008193814 | 5.05925817   | 0.001447333 | 0.969652732 | 0.999071534 | Bloc1s6  | Bloc1s6    | BLOC1S6  | 36.63397751 | 38.53852886 | 29.08233519 | 29.55677739 | 39.63395233 | 38.2001348  | 33.00479967 | 33.50498941 | 20.34928167 | 36.86245598 |
| ENSMUSG000000070047 | -0.011586623 | 4.106841111  | 0.001446799 | 0.969658336 | 0.999071534 | Fat1     | Fat1       | FAT1     | 13.61492651 | 22.05589652 | 20.73462787 | 15.40282765 | 17.33167882 | 34.27097808 | 11.06631518 | 15.12905707 | 13.1209654  | 11.76461361 |
| ENSMUSG00000037570  | 0.00834971   | 5.885817655  | 0.001446744 | 0.96965891  | 0.999071534 | Mcrs1    | Mcrs1      | MCRS1    | 73.75921525 | 48.61783641 | 63.95420932 | 54.048661   | 65.66417184 | 78.36484796 | 73.19299693 | 39.44608032 | 41.95566182 | 57.71196566 |
| ENSMUSG00000015804  | 0.012102704  | 6.196621365  | 0.001439581 | 0.96973408  | 0.999071534 | Med28    | Med28      | MED28    | 119.6569572 | 81.99813141 | 47.3261149  | 60.3624327  | 71.22338958 | 96.91919915 | 133.2487893 | 45.24900632 | 31.27032473 | 60.19560631 |
| ENSMUSG00000026174  | -0.009723173 | 5.652889611  | 0.001439565 | 0.969734247 | 0.999071534 | Rqcd1    | Rqcd1      | CNOT9    | 63.30239025 | 48.43996628 | 42.47905904 | 50.64893778 | 56.96563115 | 86.58697221 | 67.56276639 | 34.81755601 | 25.69195022 | 37.25460977 |
| ENSMUSG00000037206  | 0.027902302  | 1.5238514    | 0.001437658 | 0.969754292 | 0.999071534 | Islr     | Islr       | ISLR     | 3.579181711 | 3.913142931 | 1.750325729 | 3.538487434 | 1.177246109 | 7.785551283 | 5.565515239 | 0.414494714 | 0.15713731  | 0.849666539 |
| ENSMUSG00000046862  | 0.010425309  | 4.010296632  | 0.001433947 | 0.969793329 | 0.999071534 | Pramef8  | Pramef8    | PRAMEF25 | 18.66788892 | 19.15068434 | 12.79084186 | 16.23541293 | 15.82741991 | 15.71662689 | 12.81362811 | 16.78703593 | 16.73512354 | 14.1828953  |
| ENSMUSG00000055319  | -0.008356803 | 5.52809267   | 0.001429486 | 0.969840327 | 0.999071534 | Sec23ip  | Sec23ip    | SEC23IP  | 48.49440318 | 54.96187117 | 37.83396383 | 53.63236836 | 44.08132652 | 59.08287516 | 44.84769838 | 37.92626636 | 44.70556475 | 35.1631229  |
| ENSMUSG00000025354  | -0.008469086 | 6.622967833  | 0.001421695 | 0.969922592 | 0.999071534 | Dnajc14  | Dnajc14    | DNAJC14  | 93.54998471 | 120.4188002 | 95.72935333 | 81.5933573  | 123.0222184 | 97.28300996 | 124.9005164 | 93.7448879  | 75.34734024 | 82.41765424 |
| ENSMUSG00000025086  | -0.016194611 | 3.074419488  | 0.001413676 | 0.9700075   | 0.999071534 | Trub1    | Trub1      | TRUB1    | 12.70258607 | 3.379532531 | 13.32940363 | 6.591300122 | 7.39048946  | 10.91432423 | 11.26046107 | 3.937699786 | 8.563983406 | 5.22871716  |
| ENSMUSG00000055707  | 0.010132333  | 4.322143095  | 0.001406012 | 0.970088868 | 0.999071534 | Klh26    | Klh26      | KLHL26   | 23.79103137 | 19.92145492 | 18.71502126 | 15.74973819 | 25.11458365 | 20.08235658 | 14.49622574 | 21.96821986 | 12.09957289 | 28.23507267 |
| ENSMUSG00000008384  | -0.008341831 | 5.556252036  | 0.00140013  | 0.970151469 | 0.999071534 | Sertad1  | Sertad1    | SERTAD1  | 46.10828204 | 37.70846824 | 54.2600976  | 58.14220529 | 46.95903923 | 42.49310233 | 40.44705842 | 46.2852431  | 42.3485051  | 51.69894092 |
| ENSMUSG00000026357  | -0.025611644 | 0.851240563  | 0.001393941 | 0.97021748  | 0.999071534 | Rgs18    | Rgs18      | RG518    | 1.19306057  | 1.363671021 | 1.683005509 | 2.636520049 | 1.765869163 | 4.001918884 | 2.847472913 | 1.036236786 | 0.549980586 | 0.130717929 |
| ENSMUSG000000081895 | 0.026683451  | 3.963853175  | 0.001392329 | 0.970234705 | 0.999071534 | Gm10294  | Rpl17-ps10 |          | 13.26402634 | 52.17523908 | 0.605881983 | 2.428373729 | 12.29568158 | 15.78938905 | 34.04024437 | 12.50392388 | 10.05678785 | 3.660102012 |
| ENSMUSG000000093484 | 0.014199292  | 3.264951088  | 0.001392198 | 0.970236103 | 0.999071534 | Gm20657  | Gm20657    |          | 9.614664595 | 3.49811262  | 12.52156098 | 11.17051915 | 12.03407133 | 9.677367482 | 6.989251696 | 9.53337843  | 6.914041649 | 12.94107497 |
| ENSMUSG00000030539  | -0.009262114 | 4.580646331  | 0.001390902 | 0.970249956 | 0.999071534 | Sema4b   | Sema4b     | SEMA4B   | 23.36995117 | 23.00453723 | 22.21567271 | 22.68794884 | 32.96289104 | 36.89041589 | 23.23279036 | 19.68849893 | 13.90665195 | 24.3135348  |
| ENSMUSG000000046185 | 0.015789282  | 2.508537296  | 0.00138854  | 0.970275216 | 0.999071534 | Zfp84    | Zfp84      |          | 9.053224327 | 7.174095373 | 4.712415424 | 1.942698983 | 6.14784079  | 9.09527019  | 5.565515239 | 4.62852431  | 3.355589479 | 4.967281302 |
| ENSMUSG000000074818 | 0.022337665  | 0.504025771  | 0.001386487 | 0.970297182 | 0.999071534 | Pdcd7    | Pdcd7      | PDZD7    | 1.473780704 | 1.719411288 | 1.009803305 | 0.693821065 | 1.765869163 | 1.236956746 | 0.582437641 | 1.174401691 | 1.178529826 | 2.0261279   |
| ENSMUSG000000032178 | -0.008152977 | 5.776849983  | 0.001374936 | 0.970421112 | 0.999071534 | Ilf3     | Ilf3       | ILF3     | 43.23090066 | 65.81194929 | 52.64441231 | 62.92957064 | 59.38552593 | 75.30883718 | 42.7120937  | 60.58531075 | 43.9198782  | 43.65978829 |
| ENSMUSG000000031245 | -0.011753134 | 5.926184832  | 0.001369089 | 0.97048405  | 0.999071534 | Hmgcn5   | Hmgcn5     | HMGCN5   | 40.35351929 | 39.07213926 | 104.6829426 | 68.75766759 | 61.67461558 | 61.04745352 | 28.08643737 | 56.3021987  | 71.7331821  | 67.97332309 |
| ENSMUSG000000040380 | 0.027385353  | 0.029817251  | 0.001368797 | 0.970487198 | 0.999071534 | Cbln3    | Cbln3      | CBLN3    | 0.491260235 | 0.711480533 | 1.615685288 | 0.971349492 | 0.784830739 | 0.291048646 | 0.388291761 | 0.967154334 | 1.414235792 | 1.045743432 |
| ENSMUSG000000094989 | -0.074851081 | -0.980326938 | 0.001357509 | 0.970609079 | 0.999071534 | Rpl9-ps4 | Rpl9-ps4   |          | 0           | 1.897281421 | 0           | 0           | 0           | 2.037340523 | 0           | 0           | 0           | 0           |
| ENSMUSG000000092837 | -0.027346668 | 2.095130725  | 0.001353505 | 0.970652442 | 0.999071534 | Rpph1    | Rpph1      |          | 3.649361744 | 1.304380977 | 1.279084186 | 12.90507182 | 1.962076848 | 0.291048646 | 1.941458804 | 5.595678644 | 7.071178959 | 3.267948225 |
| ENSMUSG000000022285 | 0.00910575   | 9.767228455  | 0.001336685 | 0.970835273 | 0.999071534 | Ywhaz    | Ywhaz      | YWHAZ    | 776.9631513 | 892.9080688 | 1003.609845 | 807.7464844 | 1032.052422 | 1041.299294 | 907.7614216 | 808.3337755 | 719.4531747 | 761.3665775 |
| ENSMUSG000000037351 | 0.007621658  | 6.388766461  | 0.001332574 | 0.970880144 | 0.999071534 | Actr1b   | Actr1b     | ACTR1B   | 100.2170879 | 93.14465976 | 84.41955631 | 72.50430134 | 84.04229165 | 113.3634477 | 87.49507678 | 82.76077797 | 51.69817505 | 78.10396258 |
| ENSMUSG000000004837 | 0.014748134  | 2.566210272  | 0.001331712 | 0.970889551 | 0.999071534 | Grap     | Grap       | GRAPL    | 5.54422265  | 7.055515284 | 8.347707322 | 3.330341114 | 5.75542542  | 9.168032352 | 7.895265804 | 3.039627905 | 3.8498641   | 4.967281302 |
| ENSMUSG000000053226 | 0.017309075  | 1.579688481  | 0.001315786 | 0.971064071 | 0.999071534 | Dand5    | Dand5      | DAND5    | 2.17558104  | 5.217523908 | 2.356207712 | 1.526406344 | 3.531738326 | 3.565345915 | 2.9769035   | 2.763298096 | 1.649941757 | 3.137230296 |
| ENSMUSG000000035126 | -0.020101008 | 1.512385163  | 0.001315647 | 0.971065592 | 0.999071534 | Wdr78    | Wdr78      | WDR78    | 3.719541778 | 3.023792265 | 2.894769475 | 0.624438959 | 4.120361381 | 2.037340523 | 3.041618794 | 3.039627905 | 0.785686551 | 4.248332693 |
| ENSMUSG000000000384 | -0.009039038 | 5.20828855   | 0.001311731 | 0.971108668 | 0.999071534 | Tbrg4    | Tbrg4      | TBRG4    | 48.63476324 | 27.62916069 | 42.27709837 | 37.53571964 | 35.77520119 | 58.93735083 | 32.68122321 | 21.41556024 | 27.5759794  | 31.30686557 |
| ENSMUSG000000025064 | -0.021082629 | 1.05499772   | 0.00131008  | 0.971126855 | 0.999071534 | Col17a1  | Col17a1    | COL17A1  | 1.754500839 | 1.541541155 | 3.231370576 | 1.526406344 | 2.158284533 | 2.473913492 | 0.647152935 | 1.72706131  | 3.299883514 | 0.915025503 |
| ENSMUSG000000039765 | -0.013144518 | 3.038101158  | 0.001300007 | 0.97123802  | 0.999071534 | Cc2d2a   | Cc2d2a     | CC2D2A   | 5.965302851 | 9.782857327 | 5.99149961  | 9.297202278 | 11.05303291 | 11.64194584 | 6.859821109 | 4.559441858 | 6.285492408 | 10.19598946 |
| ENSMUSG000000039199 | 0.011323251  | 3.856733891  | 0.001292879 | 0.971316948 | 0.999071534 | Zdhhc1   | Zdhhc1     | ZDHHC1   | 13.89564664 | 12.6880695  | 17.16665619 | 15.81912029 | 14.45396611 | 12.2968053  | 7.636404631 | 14.16190274 | 15.24231909 | 18.75802281 |
| ENSMUSG000000040258 | -0.021090364 | 0.552440687  | 0.001292603 | 0.971319999 | 0.999071534 | Nxph4    | Nxph4      | NXPH4    | 0.701800335 | 1.897281421 | 1.279084186 | 1.248877918 | 1.831271725 | 1.018670261 | 1.359021163 | 2.072473572 | 0.785686551 | 1.111102397 |
| ENSMUSG000000038217 | -0.023775659 | 0.724354123  | 0.001291985 | 0.971326855 | 0.999071534 | Tlkd2    | Tlkd2      | TLCD2    | 2.17558104  | 2.253021687 | 0.336601102 | 2.081463196 | 1.046440986 | 1.819054038 | 1.359021163 | 1.519813953 | 0.235705965 | 2.548999616 |
| ENSMUSG000000008958 | -0.008245547 | 5.66098336   | 0.00128947  | 0.971354772 | 0.999071534 | Vps72    | Vps72      | VPS72    | 51.51214462 | 47.07629526 | 61.26140051 | 40.79667865 | 62.91726426 | 45.03977798 | 38.50559962 | 63.62493865 | 36.84869924 | 57.64660669 |
| ENSMUSG000000031995 | -0.024316524 | 0.580736443  | 0.001286603 | 0.971386617 | 0.999071534 | St14     | St14       | ST14     | 2.807201342 | 0.5336104   | 2.692808814 | 0.555056852 | 0.588623054 | 2.619437815 | 0.970729402 | 0.759906976 | 0.864255206 | 1.568615148 |
| ENSMUSG000000031666 | 0.008819588  | 4.885008327  | 0.001271279 | 0.971557447 | 0.999071534 | Rbl2     | Rbl2       | RBL2     | 21.82599043 | 34.74396602 | 29.01501497 | 29.97307003 | 36.62543449 | 27.94067002 | 22.19734566 | 38.13351372 | 22.3920667  | 31.1108671  |
| ENSMUSG000000047557 | -0.008450253 | 6.482648362  | 0.001265627 | 0.971620728 | 0.999071534 | Lxn      | Lxn        | LXN      | 77.89983723 | 75.41693649 | 102.4613754 | 110.040021  | 97.05740141 | 73.27149665 | 76.29933101 | 94.43571242 | 84.06846095 | 94.24762682 |

|                    |              |              |             |             |             |               |               |           |  |             |             |             |             |             |             |             |             |             |             |
|--------------------|--------------|--------------|-------------|-------------|-------------|---------------|---------------|-----------|--|-------------|-------------|-------------|-------------|-------------|-------------|-------------|-------------|-------------|-------------|
| ENSMUSG00000062081 | -0.031288778 | 3.400193459  | 0.001253977 | 0.971751583 | 0.999071534 | Gm6055        | Gm6055        |           |  | 17.68536845 | 23.3602775  | 0.471241542 | 1.040731598 | 13.14591488 | 12.58785394 | 23.815228   | 10.84594503 | 0           | 4.901922338 |
| ENSMUSG00000024236 | -0.008371219 | 5.505432542  | 0.001250506 | 0.97179069  | 0.999071534 | Svil          | Svil          | SVIL      |  | 37.68667801 | 66.2269796  | 36.95880097 | 42.32308499 | 53.04147745 | 70.36101019 | 33.84609849 | 38.47892598 | 33.15597245 | 47.25453134 |
| ENSMUSG00000005378 | -0.008537164 | 4.774343829  | 0.001248034 | 0.971818573 | 0.999071534 | Wbscr22       | Wbscr22       | WBSCR22   |  | 26.45787265 | 23.53814763 | 35.0783348  | 23.24300569 | 33.81312435 | 28.23171867 | 34.29910554 | 27.63298096 | 16.65655488 | 25.42463719 |
| ENSMUSG00000026278 | 0.009413326  | 5.52382641   | 0.001230698 | 0.972014908 | 0.999071534 | Bok           | Bok           | BOK       |  | 52.98592532 | 37.70846824 | 52.30781121 | 48.01241773 | 46.10880593 | 76.10922095 | 62.32082762 | 21.6228076  | 32.68456052 | 36.47030219 |
| ENSMUSG00000059842 | 0.016298398  | 1.752474448  | 0.001225806 | 0.972070557 | 0.999071534 | Zfp341        | Zfp341        | ZNF341    |  | 3.298461576 | 2.96450222  | 4.914376085 | 2.358991623 | 3.204725518 | 3.201535107 | 1.617882337 | 4.283112048 | 2.278490998 | 4.313691657 |
| ENSMUSG00000003382 | -0.011402705 | 4.022278958  | 0.001208539 | 0.97226789  | 0.999071534 | Etv3          | Etv3          | ETV3      |  | 15.43960738 | 25.25755892 | 11.915679   | 11.6561939  | 20.20939153 | 27.94067002 | 11.84289871 | 21.00106553 | 9.585375922 | 9.738485711 |
| ENSMUSG00000022554 | 0.012560543  | 4.495184061  | 0.001206937 | 0.972286266 | 0.999071534 | Fam203a       | High1         | HGH1      |  | 32.0020953  | 13.39955004 | 23.69671756 | 22.75733095 | 24.13354523 | 49.25998335 | 23.62108212 | 6.562832977 | 15.16375043 | 20.0652021  |
| ENSMUSG00000028068 | 0.010582321  | 4.914951101  | 0.001204953 | 0.972309042 | 0.999071534 | Iqgap3        | Iqgap3        | IQGAP3    |  | 40.84477952 | 23.8938879  | 30.02481827 | 18.38625824 | 43.55810602 | 64.1034643  | 28.28058325 | 20.86290062 | 20.66355629 | 17.5802281  |
| ENSMUSG00000075528 | -0.0104101   | 5.081885927  | 0.001197426 | 0.972395631 | 0.999071534 | Aarsd1        | Aarsd1        | AARSD1    |  | 54.6000661  | 25.43542905 | 40.32481198 | 22.75733095 | 33.74772178 | 56.02686437 | 45.30070544 | 16.37254122 | 24.27771443 | 25.42463719 |
| ENSMUSG00000022765 | -0.00929641  | 5.039990792  | 0.001194836 | 0.972425492 | 0.999071534 | Snap29        | Snap29        | SNAP29    |  | 37.40595788 | 46.42410477 | 20.39802676 | 30.04245214 | 36.9524473  | 44.23939421 | 45.23599014 | 28.60013529 | 22.78490998 | 19.67304832 |
| ENSMUSG00000070282 | -0.022501514 | 1.122171199  | 0.001175676 | 0.972647391 | 0.999071534 | 3000002C10Rik | 3000002C10Rik |           |  | 3.36864161  | 2.845922132 | 1.009803305 | 0.485674746 | 3.139322957 | 1.819054038 | 1.812028217 | 4.352194501 | 1.335667137 | 0.392153787 |
| ENSMUSG00000033799 | 0.012567373  | 4.246025777  | 0.001173915 | 0.972667873 | 0.999071534 | BC016423      | Fam208b       | FAM208B   |  | 25.47535218 | 31.00869322 | 12.38692054 | 11.79495811 | 17.46248395 | 38.34565912 | 25.8214021  | 10.84594503 | 7.542590889 | 14.37897219 |
| ENSMUSG00000049300 | -0.009172305 | 3.971106568  | 0.001172753 | 0.972681394 | 0.999071534 | Prmt6         | Prmt6         | PRMT6     |  | 17.47482835 | 13.04380977 | 19.99410544 | 15.81912029 | 14.58477124 | 22.1196971  | 14.62565633 | 13.95465538 | 10.76390575 | 14.83648494 |
| ENSMUSG00000028309 | -0.007537895 | 5.736184915  | 0.001168789 | 0.972727586 | 0.999071534 | Rnf20         | Rnf20         | RNF20     |  | 47.09080251 | 67.2942004  | 58.77055236 | 53.14669362 | 50.16376474 | 57.77315625 | 37.34072434 | 47.5978097  | 48.86970347 | 63.20211868 |
| ENSMUSG00000028729 | 0.008434285  | 6.731519059  | 0.001151797 | 0.972926486 | 0.999071534 | Ebna1bp2      | Ebna1bp2      | EBNA1BP2  |  | 115.4461552 | 68.42071125 | 139.8240976 | 107.4035009 | 117.855416  | 148.0709987 | 110.7925824 | 67.49355599 | 84.14702961 | 111.5677524 |
| ENSMUSG00000019738 | 0.009483257  | 5.155350136  | 0.001150663 | 0.972939812 | 0.999071534 | Polr2i        | Polr2i        | POLR2I    |  | 48.91548338 | 23.59743767 | 37.49736273 | 43.84949134 | 29.16954247 | 35.65345915 | 48.86004658 | 19.48125158 | 33.47024707 | 33.52914879 |
| ENSMUSG00000034509 | 0.009008477  | 3.986545722  | 0.001139224 | 0.973074597 | 0.999071534 | Mad2l1bp      | Mad2l1bp      | MAD2L1BP  |  | 19.43986929 | 15.41541155 | 16.69541464 | 12.48877918 | 17.65869163 | 20.95550252 | 16.63183042 | 15.19813953 | 8.878258026 | 16.14366423 |
| ENSMUSG00000029833 | 0.009614136  | 5.128968163  | 0.001138168 | 0.973087083 | 0.999071534 | Trim24        | Trim24        | TRIM24    |  | 26.24733254 | 32.13520407 | 46.51827226 | 45.93095454 | 28.12310149 | 31.5787781  | 19.09101158 | 42.90020294 | 35.19875748 | 36.86245598 |
| ENSMUSG00000020454 | -0.007920073 | 5.545679245  | 0.001136865 | 0.973102479 | 0.999071534 | Eif4enif1     | Eif4enif1     | EIF4ENIF1 |  | 41.47639982 | 39.72432975 | 61.32872073 | 42.94752395 | 57.09643627 | 52.53428062 | 31.38691734 | 38.40984353 | 47.61260499 | 52.4832485  |
| ENSMUSG00000037525 | -0.011754619 | 2.764468387  | 0.001131399 | 0.973167191 | 0.999071534 | Bcdin3d       | Bcdin3d       | BCDIN3D   |  | 9.404124495 | 5.454684085 | 5.99149961  | 6.799446442 | 7.128879214 | 7.203453991 | 6.989251696 | 6.079255811 | 4.635550651 | 7.320204025 |
| ENSMUSG00000097187 | -0.022380107 | 1.332092065  | 0.001128371 | 0.97320311  | 0.999071534 | Gm19426       | Gm19426       |           |  | 1.965040939 | 0.415030311 | 3.298690797 | 3.677251647 | 3.073920395 | 0.436572969 | 1.29430587  | 1.657978857 | 3.771295445 | 3.529384083 |
| ENSMUSG00000030717 | -0.010657168 | 6.5034441    | 0.001128192 | 0.973205239 | 0.999071534 | Nupr1         | Nupr1         | NUPR1     |  | 73.75921525 | 77.78853826 | 97.41235883 | 126.7611087 | 92.93704003 | 49.98760497 | 47.24216424 | 123.38126   | 86.18981464 | 115.2932134 |
| ENSMUSG00000040447 | -0.009499416 | 4.00883157   | 0.001125047 | 0.973242599 | 0.999071534 | Spns2         | Spns2         | SPNS2     |  | 14.80798708 | 16.66050248 | 15.41633046 | 18.10872981 | 18.051107   | 25.39399437 | 34.94987275 | 13.67832557 | 7.935434165 | 13.26786979 |
| ENSMUSG00000031722 | -0.013417644 | 3.642941791  | 0.001120815 | 0.973292945 | 0.999071534 | Hp            | Hp            | HPR       |  | 22.31725067 | 11.50226861 | 15.01240914 | 7.423885401 | 8.633138131 | 29.46867542 | 12.68419752 | 8.773471454 | 5.421237202 | 7.25484506  |
| ENSMUSG00000021367 | 0.016382175  | 2.381457987  | 0.001115448 | 0.973356951 | 0.999071534 | Edn1          | Edn1          | EDN1      |  | 4.070441945 | 3.675982753 | 10.83855548 | 3.81601586  | 3.793348573 | 5.74821076  | 3.106334087 | 7.115492597 | 6.285492408 | 1.895409971 |
| ENSMUSG00000022475 | -0.007747963 | 6.444592714  | 0.00111076  | 0.973412971 | 0.999071534 | Hdac7         | Hdac7         | HDAC7     |  | 79.86487817 | 86.20772457 | 103.8077798 | 78.60992672 | 104.7749037 | 86.8052587  | 56.36702062 | 91.60333187 | 80.69000879 | 99.01883122 |
| ENSMUSG00000031709 | -0.009171069 | 4.541061902  | 0.001104026 | 0.973493652 | 0.999071534 | Tbc1d9        | Tbc1d9        | TBC1D9    |  | 21.19437013 | 32.01662398 | 24.97580175 | 20.67586775 | 21.77905301 | 32.30639972 | 11.51932224 | 26.32041436 | 19.2493205  | 23.07171447 |
| ENSMUSG00000039640 | -0.012759603 | 6.160419211  | 0.001099703 | 0.97354558  | 0.999071534 | Mrpl12        | Mrpl12        | MIRPL12   |  | 134.8158444 | 59.64578467 | 60.52087809 | 61.05625376 | 57.88126701 | 117.0743179 | 143.2149445 | 27.77114586 | 28.91326508 | 43.13691657 |
| ENSMUSG00000036737 | 0.007121098  | 5.507685937  | 0.001097386 | 0.973573461 | 0.999071534 | Oxsr1         | Oxsr1         | OXSR1     |  | 54.6000661  | 55.55477161 | 40.0555311  | 38.36830492 | 47.15524691 | 62.13888594 | 45.17127485 | 48.97945875 | 31.97744262 | 34.83632808 |
| ENSMUSG00000016520 | -0.012282623 | 2.863042048  | 0.001094521 | 0.97360796  | 0.999071534 | Lnx2          | Lnx2          | LNK2      |  | 7.228543455 | 6.99622524  | 8.145746661 | 5.411804311 | 9.64176555  | 12.87890259 | 7.701119924 | 4.559441858 | 5.578374512 | 4.705845444 |
| ENSMUSG00000038503 | -0.009996312 | 6.13740646   | 0.001080463 | 0.973777936 | 0.999071534 | Mesdc2        | Mesdc2        | MESDC2    |  | 97.12916642 | 86.20772457 | 53.31761451 | 62.92957064 | 67.69165125 | 85.8593506  | 129.3011564 | 47.7359746  | 27.18475466 | 58.62699116 |
| ENSMUSG00000005161 | -0.008891072 | 8.766530044  | 0.001074789 | 0.97384686  | 0.999071534 | Prdx2         | Prdx2         |           |  | 531.473394  | 388.468371  | 412.6729507 | 510.4441579 | 418.9688096 | 364.6111914 | 583.9908084 | 376.0157884 | 352.85183   | 401.6961958 |
| ENSMUSG00000026966 | 0.008280272  | 5.624707634  | 0.001074016 | 0.973856265 | 0.999071534 | Ssna1         | Ssna1         | SSNA1     |  | 72.21525451 | 33.85461536 | 43.89278366 | 57.58714844 | 46.8282341  | 53.91676169 | 72.09283694 | 37.64993655 | 35.19875748 | 41.30686557 |
| ENSMUSG00000024663 | 0.012746709  | 4.37923654   | 0.001066541 | 0.97394736  | 0.999071534 | Rab3il1       | Rab3il1       | RAB3IL1   |  | 27.86147332 | 21.87802639 | 18.51306059 | 14.70900659 | 24.59136316 | 51.806659   | 27.30985385 | 6.493750525 | 10.8424744  | 11.30710086 |
| ENSMUSG00000035916 | 0.030419395  | -0.529814204 | 0.001064777 | 0.973968913 | 0.999071534 | Ptpqr         | Ptpqr         | PTPRQ     |  | 0.140360067 | 0.711480533 | 0.605881983 | 0.763203172 | 0.588623054 | 0.654859454 | 1.035444696 | 0.069082452 | 0           | 1.045743432 |
| ENSMUSG00000071253 | 0.008805917  | 4.075908813  | 0.001062138 | 0.974001182 | 0.999071534 | Slc25a16      | Slc25a16      | SLC25A16  |  | 13.61492651 | 14.22961066 | 21.40783007 | 19.35760773 | 17.65869163 | 17.09910796 | 19.93231039 | 17.408778   | 12.80669078 | 13.79074151 |
| ENSMUSG00000027680 | 0.007504625  | 7.282976704  | 0.001046241 | 0.974196402 | 0.999071534 | Fxr1          | Fxr1          | FXR1      |  | 154.746974  | 186.7636399 | 143.2574289 | 150.0041144 | 171.8125293 | 157.1662689 | 152.4692314 | 157.7152388 | 133.4095764 | 148.5609263 |
| ENSMUSG00000026927 | 0.007040567  | 5.389893619  | 0.001042252 | 0.974245622 | 0.999071534 | Sdccag3       | Sdccag3       | SDCCAG3   |  | 46.81008237 | 37.05627775 | 51.2980079  | 37.95201228 | 43.55810602 | 49.25998335 | 33.26366085 | 33.29774205 | 35.67016941 | 51.3721461  |
| ENSMUSG00000028654 | -0.0345869   | -0.368985759 | 0.001034661 | 0.974339557 | 0.999071534 | Mycl          | Mycl          | MYCL      |  | 1.19306057  | 0.770770577 | 0.538561763 | 0           | 0.850233301 | 2.692199976 | 0.388291761 | 0.069082452 | 0           | 0.326794823 |

|                     |              |              |             |             |             |               |               |                |             |             |             |             |             |             |             |             |             |             |
|---------------------|--------------|--------------|-------------|-------------|-------------|---------------|---------------|----------------|-------------|-------------|-------------|-------------|-------------|-------------|-------------|-------------|-------------|-------------|
| ENSMUSG00000032782  | 0.010043044  | 3.691043561  | 0.001034555 | 0.974340872 | 0.999071534 | Cntrob        | Cntrob        | CNTROB         | 14.24654681 | 10.90936817 | 13.06012275 | 9.85225913  | 18.37811981 | 17.24463228 | 8.73656462  | 8.704389002 | 14.37806388 | 12.67963911 |
| ENSMUSG00000044982  | 0.015018101  | 2.069227411  | 0.001031832 | 0.974374643 | 0.999071534 | Sft2d3        | Sft2d3        | SFT2D3         | 2.456301174 | 2.608761954 | 5.789538949 | 7.146356975 | 2.681505025 | 4.147443207 | 2.9769035   | 5.388431287 | 3.221314859 | 3.92153787  |
| ENSMUSG00000058818  | -0.010269277 | 4.443935429  | 0.001030718 | 0.974388484 | 0.999071534 | Pirb          | Pirb          | LILRA4         | 31.44065503 | 21.58157616 | 18.04181905 | 16.09664872 | 26.29182976 | 35.21688618 | 34.88154319 | 11.53676955 | 11.31388633 | 15.29399769 |
| ENSMUSG00000036968  | -0.006419864 | 5.610400582  | 0.001030409 | 0.97439232  | 0.999071534 | Cnpy4         | Cnpy4         | CNPY4          | 42.03784009 | 51.22659837 | 49.21108107 | 50.64893778 | 60.30116179 | 55.73581573 | 51.25451244 | 45.17992387 | 37.71295445 | 46.01271101 |
| ENSMUSG00000025197  | 0.039645633  | -0.635490247 | 0.001029289 | 0.974406236 | 0.999071534 | Cyp2c44       | Cyp2c44       |                | 0           | 0.355740266 | 0.269280881 | 1.387642131 | 0.523220493 | 0.072762162 | 0           | 0.967154334 | 0           | 1.437897219 |
| ENSMUSG00000087370  | -0.010189823 | 3.501546839  | 0.001025729 | 0.974450512 | 0.999071534 | Tmem170b      | Tmem170b      | TMEM170B       | 10.10592483 | 10.67220799 | 12.5888812  | 8.950291745 | 16.21983528 | 13.6065242  | 7.701119924 | 14.3691501  | 7.306884924 | 11.43781879 |
| ENSMUSG00000022463  | -0.00858265  | 6.44232851   | 0.001021851 | 0.974498847 | 0.999071534 | Srebf2        | Srebf2        | SREBF2         | 111.2353532 | 81.93884137 | 75.39864678 | 80.20571517 | 104.7749037 | 170.7000309 | 100.8264272 | 58.23650737 | 45.64838861 | 64.31322107 |
| ENSMUSG00000039043  | -0.008165379 | 4.808578884  | 0.001018979 | 0.974534687 | 0.999071534 | 2610034818Rik | Arpin         | C15orf38-AP352 | 39.65171895 | 23.30098745 | 29.01501497 | 21.50845303 | 32.50507311 | 33.61611862 | 38.05259257 | 27.56389851 | 16.49941757 | 20.78415071 |
| ENSMUSG00000089791  | -0.038533908 | -0.372575003 | 0.001018206 | 0.974544351 | 0.999071534 | Gm3555        | Gm3555        |                | 0.842160403 | 2.075151554 | 0.403921322 | 0           | 0           | 1.8918162   | 0.841298815 | 0.483577167 | 0.078568655 | 0           |
| ENSMUSG00000002308  | 0.009129168  | 4.105204071  | 0.001014484 | 0.974590901 | 0.999071534 | Cd320         | Cd320         | CD320          | 20.84366996 | 18.26133368 | 14.54116759 | 14.57024238 | 20.53640434 | 20.88274036 | 25.56254092 | 11.95126426 | 8.878258026 | 17.32012559 |
| ENSMUSG00000046079  | 0.007881753  | 5.104042891  | 0.00101388  | 0.974598465 | 0.999071534 | Lrrc8d        | Lrrc8d        | LRRC8D         | 45.54684177 | 44.40824326 | 28.54377342 | 31.63824059 | 27.53447843 | 42.78415098 | 26.33912445 | 23.69528117 | 31.34889338 | 42.22189107 |
| ENSMUSG00000004096  | -0.007830437 | 6.587091791  | 0.001009868 | 0.974648754 | 0.999071534 | Cwc15         | Cwc15         | CWC15          | 91.37440367 | 69.428642   | 130.5339072 | 113.8560368 | 92.28301441 | 87.09630734 | 77.98192864 | 93.46855809 | 95.06807267 | 101.1756771 |
| ENSMUSG00000047284  | 0.00870162   | 4.365592582  | 0.001009587 | 0.974652283 | 0.999071534 | Neur4         | Neur4         | RP11-542C16.2  | 28.91417382 | 24.30891821 | 19.79214478 | 11.10113705 | 22.825494   | 29.03210245 | 16.69654572 | 21.6228076  | 12.64955347 | 21.37238139 |
| ENSMUSG00000059890  | 0.007035648  | 5.436273583  | 0.001003228 | 0.974732215 | 0.999071534 | Ube4a         | Ube4a         | UBE4A          | 38.73937852 | 50.45582779 | 48.80715975 | 47.04106824 | 37.86808316 | 54.42609682 | 30.99862558 | 46.42340801 | 38.73434696 | 38.69250699 |
| ENSMUSG00000031256  | -0.006608625 | 6.243514997  | 0.001000022 | 0.974772605 | 0.999071534 | Cstf2         | Cstf2         | CSTF2          | 76.28569646 | 70.91089311 | 94.6522298  | 76.87537406 | 74.36271253 | 101.6487396 | 75.32860161 | 61.9669598  | 63.24776735 | 65.88183622 |
| ENSMUSG00000053007  | 0.010375301  | 4.53403467   | 0.000994034 | 0.974848219 | 0.999071534 | Creb5         | 9430076C15Rik | CREB5          | 17.05374815 | 25.73187927 | 26.18756571 | 27.33654998 | 22.3022735  | 24.37532411 | 8.9307105   | 36.89002958 | 21.60638015 | 18.43122799 |
| ENSMUSG00000026788  | 0.009116773  | 3.822704085  | 0.000993923 | 0.974849625 | 0.999071534 | Zbtb43        | Zbtb43        | ZBTB43         | 14.73780704 | 15.47470159 | 13.46404407 | 14.15394974 | 14.71557636 | 13.31547556 | 11.26046107 | 19.61941648 | 8.799689371 | 14.96720287 |
| ENSMUSG00000037913  | 0.029873526  | 0.144802824  | 0.000989908 | 0.97490045  | 0.999071534 | Tmem156       | Tmem156       | TMEM156        | 1.473780704 | 1.245090933 | 0.807842644 | 0.555056852 | 1.046440986 | 0.436572969 | 0.064715293 | 1.312566595 | 2.514196963 | 0           |
| ENSMUSG00000041765  | -0.006899529 | 5.563462451  | 0.000989816 | 0.974901626 | 0.999071534 | Ubac2         | Ubac2         | UBAC2          | 55.30186643 | 54.42826077 | 38.10324471 | 40.10285759 | 58.53529263 | 50.4969401  | 61.22066763 | 41.7948837  | 29.85608894 | 46.07806998 |
| ENSMUSG00000079343  | 0.012440393  | 3.361982782  | 0.000973258 | 0.975112365 | 0.999071534 | Gm5077        | C1s2          | C1S            | 11.79024564 | 16.30476221 | 9.626791509 | 6.383153803 | 8.633138131 | 6.112021568 | 4.659050131 | 14.64547991 | 9.428238612 | 13.00643394 |
| ENSMUSG00000064208  | -0.017414241 | 4.052082113  | 0.000973134 | 0.975113954 | 0.999071534 | Gm10145       | Gm10145       |                | 28.07201342 | 18.79494408 | 14.20456649 | 9.85225913  | 15.69661478 | 24.81189708 | 32.29293145 | 18.03052007 | 0.471411931 | 7.908434705 |
| ENSMUSG00000035246  | 0.008256368  | 4.481038271  | 0.000968879 | 0.975168401 | 0.999071534 | Pcyl1b        | Pcyl1b        | PCYT1B         | 21.68563036 | 20.98867572 | 25.17776241 | 25.60199732 | 21.1250274  | 33.10678349 | 14.49622574 | 18.99767441 | 13.67094599 | 29.99976471 |
| ENSMUSG00000058126  | 0.025775578  | 0.634556577  | 0.00096772  | 0.975183252 | 0.999071534 | Tpm3-rs7      | Tpm3-rs7      |                | 0.210540101 | 1.837991377 | 0.942483085 | 0.416292639 | 3.924153696 | 2.692199976 | 2.200319978 | 1.381649048 | 0           | 1.045743432 |
| ENSMUSG00000020260  | 0.006594952  | 6.599332809  | 0.000961212 | 0.975266812 | 0.999071534 | Pofut2        | Pofut2        | POFUT2         | 102.0417688 | 111.6431536 | 100.7783699 | 88.87847849 | 98.88867313 | 112.3447774 | 103.9327613 | 105.6961522 | 57.90509881 | 95.09729335 |
| ENSMUSG00000027075  | -0.031490879 | -0.16522087  | 0.00096087  | 0.975271207 | 0.999071534 | Slc43a1       | Slc43a1       | SLC43A1        | 0.701800335 | 0.059290044 | 0.807842644 | 1.595788451 | 0.719428178 | 1.309718907 | 2.200319978 | 0.069082452 | 0           | 0.261435858 |
| ENSMUSG00000037851  | 0.008436409  | 5.922578885  | 0.00094779  | 0.975440048 | 0.999071534 | Iars          | Iars          | IARS           | 73.61885519 | 84.48831328 | 49.88428327 | 34.06661432 | 74.03569973 | 118.020226  | 58.11433354 | 48.28863422 | 39.12719024 | 42.28725003 |
| ENSMUSG00000053510  | 0.006995363  | 6.931818457  | 0.000945674 | 0.975467466 | 0.999071534 | Nrd1          | Nrd1          | NRDC           | 119.7973173 | 163.4033624 | 101.4515721 | 109.415582  | 139.1766511 | 147.9254744 | 104.0621919 | 113.6406342 | 95.30377863 | 133.4630055 |
| ENSMUSG00000024818  | -0.010901801 | 2.751663844  | 0.000944603 | 0.975481358 | 0.999071534 | Slc25a45      | Slc25a45      | SLC25A45       | 7.298723488 | 5.632554219 | 7.472544458 | 6.383153803 | 7.652099707 | 9.168032352 | 4.724216424 | 7.460904859 | 3.928432755 | 7.124127131 |
| ENSMUSG00000094015  | -0.027746429 | -0.266399741 | 0.000941494 | 0.975521726 | 0.999071534 | Rps12-ps20    | Rps12-ps20    |                | 0.491260235 | 0.237160178 | 0.538561763 | 2.22022741  | 0.130805123 | 0.218286485 | 0.453007054 | 0.345412262 | 1.414235792 | 0.71894861  |
| ENSMUSG00000091575  | -0.034985588 | -0.793612603 | 0.000941207 | 0.975525457 | 0.999071534 | 2010016118Rik | 2010016118Rik |                | 1.263240604 | 0.237160178 | 0.403921322 | 0           | 0.457817931 | 0.145524323 | 0           | 0.27632981  | 0.15713731  | 1.503256184 |
| ENSMUSG00000037664  | -0.010968157 | 3.084523714  | 0.000939551 | 0.975547001 | 0.999071534 | Cdkn1c        | Cdkn1c        | CDKN1C         | 7.228543455 | 8.419186306 | 11.64639812 | 7.562649614 | 8.633138131 | 5.384399953 | 6.795105815 | 8.497141644 | 8.642552061 | 9.738485711 |
| ENSMUSG00000045519  | 0.011752066  | 3.283347272  | 0.000935985 | 0.975593434 | 0.999071534 | Zfp560        | Zfp560        |                | 12.21132584 | 8.300606217 | 5.452937848 | 15.26406344 | 8.044515076 | 7.567264798 | 12.10175988 | 8.635306549 | 4.871256616 | 13.59466462 |
| ENSMUSG000000001986 | 0.031655852  | -0.776897501 | 0.000931737 | 0.975648865 | 0.999071534 | Gria3         | Gria3         | GRIA3          | 1.052700503 | 0.355740266 | 0.269280881 | 0.416292639 | 0.196207685 | 0.9459081   | 1.035444696 | 0.345412262 | 0           | 0           |
| ENSMUSG000000023150 | -0.007545392 | 7.610114688  | 0.00092759  | 0.975703089 | 0.999071534 | Ivns1abp      | Ivns1abp      | IVNS1ABP       | 201.9079565 | 262.1212863 | 180.4855107 | 157.2892355 | 218.4445557 | 232.8389169 | 193.2398663 | 205.6584608 | 122.4885333 | 198.82197   |
| ENSMUSG00000038383  | 0.006999197  | 4.813797329  | 0.000923796 | 0.975752816 | 0.999071534 | Pigu          | Pigu          | PIGU           | 21.26455016 | 28.45922132 | 30.49605981 | 33.09526482 | 31.13161932 | 28.7410538  | 27.89229149 | 28.8764651  | 21.5278115  | 28.43114956 |
| ENSMUSG00000033356  | 0.011307371  | 3.12012835   | 0.000915143 | 0.975866608 | 0.999071534 | Pus7l         | Pus7l         | PUS7L          | 9.474304528 | 6.99622524  | 11.5790779  | 6.799446442 | 9.548773993 | 15.4983404  | 11.45460695 | 4.490359406 | 4.478413341 | 7.450921954 |
| ENSMUSG00000078566  | -0.01479149  | 8.577707216  | 0.000913194 | 0.975892315 | 0.999071534 | Bnip3         | Bnip3         | BNIP3          | 306.6165665 | 650.9453975 | 286.4475376 | 357.3872308 | 394.8352644 | 49.18722119 | 241.5174753 | 815.1038558 | 294.0039074 | 354.0495107 |
| ENSMUSG00000010154  | -0.008255953 | 4.000676712  | 0.000911225 | 0.975918316 | 0.999071534 | Spire2        | Spire2        | SPIRE2         | 20.77328993 | 13.28096995 | 17.63789773 | 12.21125075 | 19.16295055 | 22.04693494 | 15.27280926 | 15.33630443 | 9.428238612 | 16.07830527 |
| ENSMUSG000000016487 | 0.00684139   | 7.047847358  | 0.000909943 | 0.975935256 | 0.999071534 | Ppflbp1       | Ppflbp1       | PPF1BP1        | 124.4291995 | 157.592938  | 135.1790024 | 128.0793687 | 139.5690664 | 175.8661444 | 110.6631518 | 109.0811923 | 112.1960395 | 137.5152613 |

|                    |              |              |             |             |             |                |                |          |             |             |             |             |             |             |             |             |             |             |
|--------------------|--------------|--------------|-------------|-------------|-------------|----------------|----------------|----------|-------------|-------------|-------------|-------------|-------------|-------------|-------------|-------------|-------------|-------------|
| ENSMUSG00000033307 | 0.010240535  | 9.662165363  | 0.000903947 | 0.976014651 | 0.999071534 | Mif            | Mif            | MIF      | 635.2696636 | 688.2388355 | 1006.369974 | 915.9825707 | 931.6594899 | 475.2096769 | 421.4259911 | 1164.177488 | 663.4337236 | 1108.488038 |
| ENSMUSG00000032511 | -0.050830854 | -1.046165568 | 0.000898873 | 0.976082039 | 0.999071534 | Scn5a          | Scn5a          | SCN5A    | 0           | 0           | 0.403921322 | 1.387642131 | 0           | 0           | 0           | 1.4507315   | 0           | 0.196076894 |
| ENSMUSG00000029575 | 0.014230705  | 2.571166907  | 0.000898773 | 0.976083364 | 0.999071534 | Mmab           | Mmab           | MMAB     | 7.93034379  | 4.743203553 | 4.039213221 | 4.232308499 | 9.287163747 | 9.459080998 | 5.112508185 | 3.246875263 | 1.335667137 | 10.45743432 |
| ENSMUSG00000029676 | -0.010931605 | 3.114834747  | 0.000897242 | 0.976103746 | 0.999071534 | Pot1a          | Pot1a          | POT1     | 10.456825   | 12.33232924 | 5.049016526 | 7.493267507 | 9.287163747 | 11.13261071 | 11.97232929 | 7.737234668 | 4.00700141  | 7.25484506  |
| ENSMUSG00000082792 | 0.013390853  | 2.281265462  | 0.000894179 | 0.976144549 | 0.999071534 | Gm12176        | Gm12176        |          | 2.807201342 | 2.430891821 | 8.213066882 | 5.550568524 | 5.297607489 | 3.783632399 | 3.688771728 | 5.802926001 | 3.614158135 | 5.816947841 |
| ENSMUSG00000079469 | -0.011406603 | 2.742022537  | 0.000892066 | 0.97617274  | 0.999071534 | Pigb           | Pigb           | PIGB     | 8.351423991 | 6.284744707 | 7.001302916 | 7.84017804  | 4.578179312 | 11.13261071 | 5.500799946 | 5.319348834 | 6.285492408 | 3.856178906 |
| ENSMUSG00000001036 | -0.006837497 | 6.069521026  | 0.000889143 | 0.9762118   | 0.999071534 | Epn2           | Epn2           | EPN2     | 82.81243958 | 55.19903134 | 60.38623765 | 67.16187914 | 83.7806814  | 60.46535622 | 56.94945826 | 56.78577587 | 63.40490466 | 81.04511599 |
| ENSMUSG00000027300 | -0.011597359 | 2.580182275  | 0.000879746 | 0.976337799 | 0.999071534 | Ubox5          | Ubox5          | UBOX5    | 4.070441945 | 8.47847635  | 7.270583797 | 3.469105327 | 7.325086899 | 5.457162114 | 4.788931717 | 7.115492597 | 4.635550651 | 5.94766577  |
| ENSMUSG00000030689 | -0.00770367  | 5.078072923  | 0.000879032 | 0.9763474   | 0.999071534 | Ino80e         | Ino80e         | INO80E   | 35.65145704 | 33.61745518 | 30.15945871 | 36.42560594 | 39.30693952 | 59.01011299 | 35.39926553 | 22.45179703 | 14.84947581 | 37.97355838 |
| ENSMUSG00000035900 | -0.007860214 | 4.608916112  | 0.000876028 | 0.976387843 | 0.999071534 | Gramd4         | Gramd4         | GRAMD4   | 26.10697248 | 36.87840762 | 23.56207712 | 17.34552664 | 23.02170168 | 40.38299964 | 21.35604685 | 17.47786046 | 16.81369219 | 24.37889376 |
| ENSMUSG00000036376 | -0.007309169 | 4.410609997  | 0.000874088 | 0.976413992 | 0.999071534 | Abt1           | Abt1           | ABT1     | 20.70310989 | 15.00038123 | 26.52416681 | 24.49188361 | 22.95629912 | 26.12161599 | 19.8028798  | 20.10299365 | 15.63516236 | 21.11094554 |
| ENSMUSG00000028186 | 0.013507796  | 2.236796061  | 0.000873607 | 0.97642049  | 0.999071534 | Uox            | Uox            |          | 7.368903522 | 3.201662398 | 5.789538949 | 4.371072713 | 2.943115272 | 5.166113468 | 7.959981098 | 2.417885834 | 2.121353688 | 5.032640267 |
| ENSMUSG00000063856 | -0.011807997 | 8.76773581   | 0.000872791 | 0.976431496 | 0.999071534 | Gpx1           | Gpx1           | GPX1     | 736.3289119 | 472.2452037 | 261.7410167 | 393.1883978 | 418.0531737 | 494.8554605 | 977.7833692 | 266.6582662 | 151.480367  | 271.0436258 |
| ENSMUSG00000011427 | 0.011972127  | 2.447335552  | 0.000871009 | 0.976455555 | 0.999071534 | Zfp790         | Zfp790         | ZNF790   | 5.052962415 | 7.885575906 | 4.106533441 | 3.677251647 | 6.932671529 | 9.022508029 | 6.212668174 | 2.970545453 | 3.378452169 | 5.097999231 |
| ENSMUSG00000023243 | -0.021274194 | 0.811381507  | 0.000867696 | 0.976500367 | 0.999071534 | Kcnk5          | Kcnk5          | KCNK5    | 1.754500839 | 1.956571465 | 1.144443746 | 1.734552664 | 1.831271725 | 3.929156722 | 2.65327033  | 0.483577167 | 0           | 1.372538255 |
| ENSMUSG00000026029 | -0.006309812 | 5.59113696   | 0.000865114 | 0.976535347 | 0.999071534 | Casp8          | Casp8          | CASP8    | 62.10932968 | 48.67712646 | 47.52807556 | 37.67448386 | 55.33056711 | 72.32558855 | 51.31922773 | 38.54800844 | 35.43446345 | 39.01930181 |
| ENSMUSG00000059791 | 0.009058298  | 3.776922036  | 0.000864298 | 0.976546417 | 0.999071534 | Nrm            | Nrm            | NRM      | 14.73780704 | 7.944865951 | 13.39672385 | 14.36209606 | 19.88237873 | 17.24463228 | 16.56711513 | 9.257048621 | 10.44963113 | 13.00643394 |
| ENSMUSG00000028550 | 0.010300473  | 3.479587579  | 0.000860376 | 0.976599667 | 0.999071534 | Atg4c          | Atg4c          | ATG4C    | 12.91312617 | 15.47470159 | 10.97319592 | 4.856747458 | 13.34212257 | 10.91432423 | 11.71346812 | 14.02373784 | 5.578374512 | 11.69925465 |
| ENSMUSG00000032641 | -0.0150106   | 1.286742927  | 0.000842123 | 0.976849148 | 0.999071534 | Gpr19          | Gpr19          | GPRI9    | 2.035220973 | 2.371601776 | 2.625488593 | 2.081463196 | 2.943115272 | 0.800383777 | 2.006174098 | 3.108710358 | 2.278490998 | 2.483640651 |
| ENSMUSG00000010025 | 0.005970843  | 5.666419523  | 0.000834811 | 0.976949857 | 0.999071534 | Aldh3a2        | Aldh3a2        | ALDH3A2  | 55.37204646 | 53.36103997 | 52.10585054 | 41.21297129 | 61.34760278 | 64.97661024 | 37.21129375 | 52.77899363 | 40.46285738 | 51.56822299 |
| ENSMUSG00000082895 | -0.013480645 | 1.780925207  | 0.000831894 | 0.976990153 | 0.999071534 | Rpsa-ps9       | Rpsa-ps9       |          | 3.158101509 | 2.134441599 | 5.789538949 | 2.150845303 | 4.054958819 | 2.837724299 | 3.429910554 | 2.970545453 | 2.121353688 | 4.509768551 |
| ENSMUSG00000037316 | 0.007461008  | 4.280683892  | 0.000831466 | 0.976996065 | 0.999071534 | Bag4           | Bag4           | BAG4     | 20.98383003 | 20.98867572 | 21.07122897 | 16.51294136 | 20.6018069  | 23.42941601 | 21.61490802 | 20.10299365 | 17.12796681 | 11.30710086 |
| ENSMUSG00000061533 | -0.011005281 | 3.221158878  | 0.000827503 | 0.977050936 | 0.999071534 | Cep128         | Cep128         | CEP128   | 10.456825   | 9.486407105 | 7.472544458 | 8.117706466 | 12.55729183 | 20.8099782  | 9.707294022 | 4.766689215 | 5.892649132 | 5.555511983 |
| ENSMUSG00000024642 | -0.011964085 | 2.813356166  | 0.000825836 | 0.977074059 | 0.999071534 | Tle4           | Tle4           | TLE4     | 9.895384729 | 9.604987194 | 4.577774983 | 6.452535909 | 5.493815174 | 14.98900527 | 6.536244641 | 4.075864691 | 2.907040239 | 6.731973344 |
| ENSMUSG00000057729 | -0.020617894 | 0.919458639  | 0.000821832 | 0.977129682 | 0.999071534 | Prtn3          | Prtn3          | PRTN3    | 1.543960738 | 1.956571465 | 1.144443746 | 1.248877918 | 3.335530641 | 0.436572969 | 1.48845175  | 3.937699786 | 0.078568655 | 2.418281687 |
| ENSMUSG00000029126 | -0.021768864 | 0.382547295  | 0.000818858 | 0.977171099 | 0.999071534 | Nsg1           | Nsg1           | NSG1     | 1.333420637 | 0.474320355 | 1.413724627 | 0.693821065 | 2.223687094 | 2.110102684 | 2.718042326 | 0.138164905 | 0.392843275 | 0.522871716 |
| ENSMUSG00000028194 | 0.008551475  | 3.759895642  | 0.000807938 | 0.977323782 | 0.999071534 | Ddah1          | Ddah1          | DDAH1    | 9.684844629 | 16.54192239 | 17.50325729 | 12.62754339 | 13.01510976 | 22.55627007 | 13.8490728  | 11.81309936 | 7.621159544 | 11.43781879 |
| ENSMUSG00000092574 | -0.047418383 | -1.336735051 | 0.000804895 | 0.97736652  | 0.999071534 | 2810047C21Rik1 | 2810047C21Rik1 |          | 1.052700503 | 0           | 0           | 0           | 0.327012808 | 1.236956746 | 0.19414588  | 0           | 0           | 0           |
| ENSMUSG00000004677 | 0.006270549  | 6.520421891  | 0.000795961 | 0.97749244  | 0.999071534 | Myo9b          | Myo9b          | MYO9B    | 98.53276709 | 105.2398288 | 92.49798275 | 91.16808801 | 87.37782229 | 124.4232962 | 60.70294528 | 82.06995344 | 82.65422516 | 96.46983161 |
| ENSMUSG00000079084 | 0.013814261  | 2.239784137  | 0.000794723 | 0.977509948 | 0.999071534 | Ccdc82         | Ccdc82         | CCDC82   | 6.035482885 | 9.54569715  | 1.88496617  | 3.330341114 | 3.008517833 | 7.567264798 | 4.724216424 | 5.664761096 | 1.728510412 | 3.464025119 |
| ENSMUSG00000000915 | -0.006767703 | 4.7411852    | 0.000791151 | 0.97756054  | 0.999071534 | Hip1r          | Hip1r          | HIP1R    | 31.79155519 | 29.40786203 | 23.22547602 | 27.12840366 | 26.94585538 | 24.66637276 | 20.12645627 | 30.11994924 | 26.00622484 | 25.29391926 |
| ENSMUSG00000006586 | 0.017409617  | 1.917358212  | 0.000789378 | 0.977585683 | 0.999071534 | Runx1t1        | Runx1t1        | RUNX1T1  | 1.263240604 | 3.913142931 | 5.250977187 | 5.897479057 | 2.289089656 | 2.619437815 | 1.876743511 | 0.828989429 | 8.092571475 | 3.006512367 |
| ENSMUSG00000055480 | -0.024432043 | -0.189180899 | 0.000786633 | 0.977624687 | 0.999071534 | Zfp458         | Zfp458         |          | 1.403600671 | 1.422961066 | 0.471241542 | 0           | 0.654025616 | 1.236956746 | 0.776583522 | 0.207247357 | 1.021392516 | 0.326794823 |
| ENSMUSG00000094437 | -0.010852278 | 3.178305194  | 0.000782167 | 0.977688274 | 0.999071534 | Gm9830         | Gm9830         | FAM103A1 | 13.33420637 | 11.97658897 | 3.635291898 | 6.521918016 | 11.38004572 | 10.69603774 | 9.448432848 | 11.39860464 | 4.635550651 | 7.450921954 |
| ENSMUSG00000044645 | -0.008000165 | 5.354508227  | 0.000776019 | 0.977776111 | 0.999071534 | Gm7334         | Gm7334         | BTG3     | 49.40674361 | 58.04495347 | 30.02481827 | 41.49049972 | 33.42070898 | 24.0115133  | 44.32997603 | 59.47999151 | 26.00622484 | 39.93432731 |
| ENSMUSG00000025047 | -0.007812627 | 4.59979139   | 0.000768533 | 0.977883536 | 0.999071534 | Pdcd11         | Pdcd11         | PDCD11   | 27.51057315 | 29.52644211 | 22.28299293 | 21.1615425  | 25.3761939  | 47.51369147 | 17.53784453 | 15.68171669 | 21.76351746 | 17.32012559 |
| ENSMUSG00000063760 | -0.007089284 | 5.239793863  | 0.000761878 | 0.977979483 | 0.999071534 | Rnf217         | Rnf217         | RNF217   | 27.86147332 | 48.79570655 | 40.0555311  | 37.74386596 | 41.33441893 | 32.01535107 | 24.46238094 | 50.15386044 | 31.50603069 | 40.84935282 |
| ENSMUSG00000074412 | 0.01764939   | 0.606408756  | 0.00075909  | 0.978019798 | 0.999071534 | Gm10689        | Gm10689        |          | 1.543960738 | 1.363671021 | 1.009803305 | 0.971349492 | 2.354492217 | 1.309718907 | 0.906014109 | 1.865226215 | 2.121353688 | 0.326794823 |
| ENSMUSG00000042208 | -0.007169998 | 4.869615413  | 0.000753413 | 0.978102121 | 0.999071534 | 0610010F05Rik  | 0610010F05Rik  | KIAA1841 | 34.45839647 | 26.50264985 | 27.39932968 | 28.16913526 | 35.2519807  | 44.23939421 | 42.51794782 | 20.03391119 | 17.20653547 | 20.52271485 |

|                     |              |              |             |             |             |               |               |           |             |             |             |             |             |             |             |             |             |             |
|---------------------|--------------|--------------|-------------|-------------|-------------|---------------|---------------|-----------|-------------|-------------|-------------|-------------|-------------|-------------|-------------|-------------|-------------|-------------|
| ENSMUSG00000022838  | -0.015352442 | 1.322460517  | 0.000750137 | 0.978149773 | 0.999071534 | Eaf2          | Eaf2          | EAF2      | 2.386121114 | 1.304380977 | 1.750325729 | 5.342422204 | 1.373453794 | 1.382481069 | 2.135604685 | 1.934308667 | 2.592765618 | 3.006512367 |
| ENSMUSG00000019818  | 0.007531098  | 8.8081615    | 0.000745227 | 0.978221375 | 0.999071534 | Cd164         | Cd164         | CD164     | 367.9539159 | 497.0284423 | 403.6520412 | 454.7997084 | 598.5642437 | 374.5068454 | 472.2274965 | 583.1940631 | 327.4741544 | 395.944607  |
| ENSMUSG000000067713 | 0.006660473  | 6.156869301  | 0.000736537 | 0.978348704 | 0.999071534 | Prkag1        | Prkag1        | PRKAG1    | 90.74278337 | 83.7175427  | 60.92479941 | 67.23126125 | 66.97222307 | 88.91536138 | 106.068366  | 62.38145451 | 35.82730672 | 59.80345252 |
| ENSMUSG00000032376  | -0.006354179 | 5.021275009  | 0.000731177 | 0.978427604 | 0.999071534 | Usp3          | Usp3          | USP3      | 37.33577784 | 44.52682335 | 28.00521166 | 27.89160683 | 31.0008142  | 32.88849701 | 43.10038546 | 31.29435093 | 20.58498764 | 29.0847392  |
| ENSMUSG00000028426  | 0.007126188  | 8.106627281  | 0.000730558 | 0.978436738 | 0.999071534 | Rad23b        | Rad23b        | RAD23B    | 226.8218684 | 298.8218238 | 336.1971804 | 238.0500076 | 329.1710925 | 359.8816509 | 209.6775509 | 324.7566087 | 201.8428749 | 252.220244  |
| ENSMUSG00000041716  | 0.00942922   | 3.178176819  | 0.000725512 | 0.978511307 | 0.999071534 | Gm20604       | Gm20604       | C14orf142 | 7.368903522 | 9.782857327 | 8.684308424 | 9.782877023 | 10.46440986 | 14.1886215  | 10.35444696 | 4.214029596 | 6.206923753 | 9.477049853 |
| ENSMUSG00000033585  | -0.028982207 | -0.409325798 | 0.000724436 | 0.978527245 | 0.999071534 | Ndn           | Ndn           | NDN       | 0.491260235 | 0.177870133 | 1.077123525 | 1.040731598 | 0.39241537  | 1.309718907 | 1.68259763  | 0           | 0.15713731  | 0           |
| ENSMUSG00000029176  | 0.005401856  | 6.27612231   | 0.000699897 | 0.978893967 | 0.999071534 | Anapc4        | Anapc4        | ANAPC4    | 80.84739864 | 77.432798   | 84.82347763 | 79.442512   | 78.09065855 | 87.46011815 | 87.10678502 | 62.93411413 | 56.1765884  | 83.52875664 |
| ENSMUSG00000043458  | -0.019949822 | -0.257532696 | 0.000695318 | 0.978963111 | 0.999071534 | Pcdhb12       | Pcdhb12       | PCDH85    | 0.98252047  | 0.592900444 | 0.403921322 | 1.318260024 | 0.327012808 | 1.309718907 | 0.711868228 | 0.414494714 | 0.235705965 | 0.849666539 |
| ENSMUSG00000026080  | 0.022915937  | -0.151524538 | 0.00069057  | 0.979035049 | 0.999071534 | Chst10        | Chst10        | CHST10    | 1.122880537 | 1.007930755 | 1.009803305 | 0.693821065 | 0.065402562 | 1.746291877 | 0.582437641 | 0.138164905 | 0.078568655 | 1.437897219 |
| ENSMUSG00000087070  | -0.029677068 | 0.102290316  | 0.000678971 | 0.97921181  | 0.999071534 | Gm12505       | Gm12505       |           | 0.842160403 | 3.201662398 | 0.336601102 | 0.485674746 | 0           | 1.8918162   | 1.68259763  | 1.174401691 | 0           | 0           |
| ENSMUSG00000031299  | 0.006166785  | 7.575987093  | 0.000675511 | 0.979264841 | 0.999071534 | Pdha1         | Pdha1         | PDHA1     | 176.7835045 | 196.7243673 | 207.6828798 | 188.0948909 | 218.6407634 | 247.1730627 | 186.9624829 | 190.5294037 | 146.5305418 | 161.1752065 |
| ENSMUSG00000090942  | 0.017301787  | 0.903825985  | 0.000673251 | 0.979299541 | 0.999071534 | F830016B08Rik | F830016B08Rik |           | 0.631620302 | 1.897281421 | 1.346404407 | 3.677251647 | 1.24264867  | 1.746291877 | 0.582437641 | 4.075864691 | 0.549980586 | 1.568615148 |
| ENSMUSG00000021244  | 0.007002054  | 5.140685487  | 0.000671409 | 0.979327876 | 0.999071534 | Ylpm1         | Ylpm1         | YLPM1     | 33.54605603 | 37.6491782  | 36.62219987 | 34.62167117 | 39.56854977 | 50.20589145 | 20.70889391 | 20.24115855 | 42.97705434 | 35.09776394 |
| ENSMUSG00000029536  | -0.008189988 | 3.579352173  | 0.000669464 | 0.979357834 | 0.999071534 | Gatc          | Gatc          | GATC      | 11.0884453  | 11.56155866 | 8.549667983 | 14.8477708  | 15.36960198 | 19.20921064 | 12.16647517 | 11.26043974 | 6.206923753 | 10.06528053 |
| ENSMUSG00000000355  | -0.005949714 | 5.987731833  | 0.00066595  | 0.979412071 | 0.999071534 | Mcts1         | Mcts1         | MCTS1     | 72.42579462 | 66.76059    | 64.15616999 | 64.94165173 | 61.08599253 | 59.08287516 | 91.83100145 | 45.31808877 | 42.81991703 | 67.31973344 |
| ENSMUSG00000021102  | 0.007969794  | 6.454814567  | 0.000659547 | 0.979511255 | 0.999071534 | Glrx5         | Glrx5         | GLRX5     | 127.7978411 | 62.90673712 | 86.16988204 | 108.3748504 | 66.5798077  | 121.7310962 | 144.2503892 | 40.27506975 | 50.83391985 | 79.28042394 |
| ENSMUSG00000039167  | 0.01238987   | 3.681479938  | 0.000657872 | 0.979537283 | 0.999071534 | Eltcl1        | Adgrl4        | ADGRL4    | 12.562226   | 23.83459785 | 11.84835878 | 7.285121188 | 10.46440986 | 21.173789   | 27.30985385 | 5.18118393  | 2.199922343 | 9.411690889 |
| ENSMUSG000000061371 | 0.019639351  | 0.969245281  | 0.000656181 | 0.979563599 | 0.999071534 | Zfp873        | Zfp873        |           | 1.333420637 | 3.438822576 | 2.154247051 | 0           | 2.550699902 | 2.40115133  | 4.335924663 | 0.690824524 | 0.549980586 | 1.176461361 |
| ENSMUSG00000024614  | -0.006178048 | 6.988256225  | 0.000655433 | 0.979575244 | 0.999071534 | Tmx3          | Tmx3          | TMX3      | 120.5692976 | 121.485301  | 142.7188671 | 139.1111236 | 134.6638743 | 120.5669016 | 175.960883  | 108.4594503 | 102.2963889 | 101.8946257 |
| ENSMUSG00000030729  | -0.006470456 | 4.132227776  | 0.00065288  | 0.979615057 | 0.999071534 | Pgm2l1        | Pgm2l1        | PGM2L1    | 19.51004932 | 22.17447661 | 17.50325729 | 15.33344555 | 16.15443271 | 21.7558863  | 15.66110102 | 14.99089217 | 16.26371161 | 15.29399769 |
| ENSMUSG00000041658  | 0.01919648   | 0.495061597  | 0.000652392 | 0.979622672 | 0.999071534 | Rragb         | Rragb         | RRAGB     | 2.807201342 | 0.652190488 | 0.875162864 | 0.069382107 | 2.289089656 | 0.873145938 | 1.617882337 | 0.967154334 | 0.471411931 | 2.287563758 |
| ENSMUSG00000073647  | -0.023897197 | 3.060175986  | 0.000650377 | 0.979654155 | 0.999071534 | Gm10557       | Gm10557       |           | 8.91286426  | 21.64086621 | 4.443134543 | 0           | 8.633138131 | 11.56918368 | 9.319002261 | 16.92520084 | 0           | 3.267948225 |
| ENSMUSG000000405078 | 0.005988448  | 5.413164943  | 0.000647716 | 0.979695813 | 0.999071534 | Rnf216        | Rnf216        | RNF216    | 39.37099882 | 45.65333419 | 53.04833363 | 42.87814185 | 38.71831646 | 48.24131309 | 26.33912445 | 38.54800844 | 41.87709317 | 49.14994131 |
| ENSMUSG00000022964  | 0.007478165  | 3.747143877  | 0.000646999 | 0.979707057 | 0.999071534 | Tmem50b       | Tmem50b       | TMEM50B   | 15.36942735 | 13.39955004 | 11.78103856 | 10.5460802  | 18.11650956 | 21.90141062 | 14.62565633 | 11.53676955 | 7.6997282   | 10.78422914 |
| ENSMUSG00000055833  | -0.008933748 | 5.139074871  | 0.000638981 | 0.979833167 | 0.999071534 | 1700034H15Rik | 1700034H15Rik |           | 26.45787265 | 22.05589652 | 48.80715975 | 53.35483994 | 30.1505809  | 22.70179439 | 14.56094103 | 41.72580125 | 40.0700141  | 43.79050622 |
| ENSMUSG00000039887  | 0.006780196  | 4.259798743  | 0.000633656 | 0.979917353 | 0.999071534 | Alg14         | Alg14         | ALG14     | 18.59770889 | 19.44713457 | 19.79214478 | 18.59440456 | 22.17146838 | 23.28389169 | 28.7983056  | 14.09282029 | 13.51380868 | 13.59464642 |
| ENSMUSG00000057722  | -0.015395002 | 0.376305074  | 0.000626494 | 0.980031151 | 0.999071534 | Lepr          | Lepr          | LEPR      | 1.684320805 | 1.245090933 | 0.942483085 | 1.040731598 | 1.177246109 | 0.654859454 | 1.48845175  | 1.865226215 | 0.549980586 | 0.980384468 |
| ENSMUSG00000038390  | -0.01288445  | 1.168835914  | 0.000625597 | 0.980045436 | 0.999071534 | Gpr162        | Gpr162        | GPR162    | 3.087921476 | 2.845922132 | 1.817645949 | 1.248877918 | 2.092881971 | 1.819054038 | 1.48845175  | 2.763298096 | 1.099961171 | 3.006512367 |
| ENSMUSG00000025880  | -0.007991562 | 4.262847844  | 0.000622553 | 0.980094042 | 0.999071534 | Smad7         | Smad7         | SMAD7     | 15.50978741 | 26.26548967 | 26.92808814 | 10.47669809 | 20.6018069  | 24.37532411 | 10.67802342 | 27.35665115 | 11.70672961 | 18.95409971 |
| ENSMUSG00000048696  | 0.005405152  | 5.661116434  | 0.000612371 | 0.980257457 | 0.999071534 | Mex3d         | Mex3d         | MEX3D     | 44.42396123 | 55.19903134 | 52.57709209 | 43.64134502 | 66.38360002 | 56.5361995  | 39.86462078 | 63.21044394 | 34.49163959 | 51.50286403 |
| ENSMUSG00000033705  | 0.007136007  | 3.984088937  | 0.000609012 | 0.980311669 | 0.999071534 | Stard9        | Stard9        |           | 14.66762701 | 15.94902195 | 15.2143698  | 14.98653501 | 20.53640434 | 15.35281608 | 10.22501637 | 13.12566595 | 15.71373102 | 20.58807382 |
| ENSMUSG00000072621  | 0.018803698  | 0.353155541  | 0.000595252 | 0.980535321 | 0.999071534 | Slfm10-ps     | Slfm10-ps     |           | 1.263240604 | 1.067220799 | 0.06732022  | 2.567137942 | 0.850233301 | 2.328389169 | 0.258861174 | 0.898071881 | 1.021392516 | 1.241820326 |
| ENSMUSG000000007030 | -0.019234751 | -0.08988522  | 0.000594576 | 0.98054637  | 0.999071534 | Vwa7          | Vwa7          | VWA7      | 0.070180034 | 1.007930755 | 1.817645949 | 0.416292639 | 0.915635862 | 0.509335131 | 0.841298815 | 0.759906976 | 1.099961171 | 0.522871716 |
| ENSMUSG00000025484  | 0.007255019  | 4.166098043  | 0.000591053 | 0.980604068 | 0.999071534 | Bet1l         | Bet1l         | BET1L     | 26.31751258 | 18.49849386 | 14.67580803 | 15.26406344 | 17.92030188 | 24.15703763 | 26.46855503 | 16.64887103 | 8.01400282  | 13.52930565 |
| ENSMUSG00000028601  | 0.009639934  | 2.441195083  | 0.000590987 | 0.980605165 | 0.999071534 | Echdc2        | Echdc2        | ECHDC2    | 6.246022985 | 4.861783641 | 7.135943356 | 2.636520049 | 6.736463844 | 6.330308052 | 5.630230533 | 4.766689215 | 5.106962581 | 3.790819941 |
| ENSMUSG00000027217  | -0.011578867 | 2.378572676  | 0.000590362 | 0.980615416 | 0.999071534 | Tspan18       | Tspan18       | TSPAN18   | 4.982782381 | 7.233385418 | 8.886269085 | 1.318260024 | 4.185763942 | 9.386318836 | 3.17104938  | 3.730452429 | 4.00700141  | 4.836563373 |
| ENSMUSG00000024382  | -0.005398643 | 5.181626034  | 0.000589156 | 0.980635216 | 0.999071534 | Ercc3         | Ercc3         | ERCC3     | 45.75738187 | 33.73603527 | 37.83396383 | 38.02139439 | 32.57047567 | 47.0771185  | 37.27600904 | 29.36004227 | 34.02022766 | 27.12397027 |
| ENSMUSG00000031575  | 0.005269897  | 6.162509618  | 0.000579729 | 0.980790748 | 0.999071534 | Ash2l         | Ash2l         | ASH2L     | 87.72504193 | 70.4958628  | 72.36923687 | 61.75007483 | 79.33330722 | 98.08339373 | 90.79555675 | 54.16064268 | 45.96266323 | 64.50929797 |

|                    |              |              |             |             |             |               |               |          |             |             |             |             |             |             |             |             |             |             |
|--------------------|--------------|--------------|-------------|-------------|-------------|---------------|---------------|----------|-------------|-------------|-------------|-------------|-------------|-------------|-------------|-------------|-------------|-------------|
| ENSMUSG00000061603 | -0.028418383 | -0.180576918 | 0.000574843 | 0.980871852 | 0.999071534 | Akap6         | Akap6         | AKAP6    | 1.473780704 | 0.059290044 | 0.740522424 | 0.763203172 | 0.850233301 | 1.8918162   | 2.006174098 | 0           | 0           | 0           |
| ENSMUSG00000046032 | 0.005247215  | 6.369504939  | 0.000573885 | 0.98088779  | 0.999071534 | Snx12         | Snx12         | SNX12    | 86.46180132 | 97.82857327 | 69.33982695 | 70.83913079 | 104.9711114 | 97.28300996 | 90.2778344  | 87.45838473 | 47.7697423  | 82.74444906 |
| ENSMUSG00000029840 | 0.006290036  | 7.849681142  | 0.000573228 | 0.980898731 | 0.999071534 | Mtpn          | Mtpn          | MTPN     | 205.6274983 | 295.3237112 | 216.0305871 | 222.9247083 | 255.2661979 | 282.6809975 | 310.5686934 | 217.1261479 | 151.2446611 | 170.4561794 |
| ENSMUSG00000014177 | -0.005618738 | 6.293312111  | 0.00056905  | 0.980968448 | 0.999071534 | Tvp23b        | Tvp23b        | TVP23B   | 91.93584394 | 76.3655772  | 70.68623136 | 87.49083636 | 80.31434564 | 59.73773461 | 103.0914625 | 82.1390359  | 64.66200315 | 62.80996489 |
| ENSMUSG00000030120 | 0.006519112  | 6.994004701  | 0.000563234 | 0.981065934 | 0.999071534 | Mlf2          | Mlf2          | MLF2     | 165.6950592 | 142.829717  | 122.9267223 | 104.836363  | 125.7037234 | 220.4693494 | 169.1010619 | 71.63850313 | 80.1400282  | 98.56131847 |
| ENSMUSG00000055994 | 0.009427329  | 2.157805775  | 0.000562945 | 0.981070792 | 0.999071534 | Nod2          | Nod2          | NOD2     | 4.421342113 | 5.454684085 | 5.183656966 | 3.746633754 | 3.597140888 | 4.729540499 | 3.17104938  | 4.62852431  | 4.399844685 | 3.856178906 |
| ENSMUSG00000087141 | -0.012872262 | 1.290728775  | 0.00056106  | 0.981102506 | 0.999071534 | Plcxd2        | Plcxd2        | PLCXD2   | 1.403600671 | 3.616692709 | 2.288887492 | 1.942698983 | 2.812310149 | 1.45524323  | 1.29430587  | 4.559441858 | 1.257098482 | 2.418281687 |
| ENSMUSG00000054892 | 0.014440388  | 1.430263168  | 0.000557733 | 0.981158612 | 0.999071534 | Txx           | Txx           | TXK      | 6.386383052 | 3.023792265 | 2.086926831 | 0.832585279 | 1.046440986 | 1.746291877 | 2.78275762  | 2.901463001 | 0.707117896 | 4.379050622 |
| ENSMUSG00000041354 | 0.005293614  | 5.225758044  | 0.000555613 | 0.981194456 | 0.999071534 | Rgl2          | Rgl2          | RGL2     | 43.65198086 | 34.9811262  | 36.21827854 | 36.91128068 | 41.66143174 | 46.64054554 | 24.59181152 | 38.54800844 | 27.2632332  | 45.09768551 |
| ENSMUSG00000066443 | 0.006751181  | 8.711055999  | 0.000553673 | 0.981227302 | 0.999071534 | Gm10163       | Gm10163       |          | 419.6064205 | 552.1681836 | 342.9965226 | 379.1732123 | 481.6244636 | 382.9472561 | 610.1357869 | 454.6316192 | 216.2995075 | 382.2845834 |
| ENSMUSG00000082108 | 0.013351021  | 0.462682217  | 0.000547989 | 0.981323898 | 0.999071534 | Gm13777       | Gm13777       |          | 1.19306057  | 1.067220799 | 1.481044848 | 0.763203172 | 1.962076848 | 1.600767553 | 1.229590576 | 0.967154334 | 1.099961171 | 1.176461361 |
| ENSMUSG00000095193 | -0.011437928 | 1.847888943  | 0.000545819 | 0.981360907 | 0.999071534 | Gm20939       | Gm20939       | ZNF788   | 3.579181711 | 3.023792265 | 4.039213221 | 5.411804311 | 1.831271725 | 4.365729691 | 5.953807    | 1.865226215 | 2.671334273 | 2.0261279   |
| ENSMUSG00000013662 | -0.005363132 | 6.235289249  | 0.000544339 | 0.981386192 | 0.999071534 | Atad1         | Atad1         | ATAD1    | 84.77748052 | 65.6933692  | 70.68623136 | 83.05038154 | 86.72379668 | 91.60756136 | 105.2270672 | 68.46071032 | 43.84130954 | 59.99952942 |
| ENSMUSG00000029605 | 0.009594831  | 2.863868618  | 0.000539918 | 0.981461912 | 0.999071534 | Oas1b         | Oas1b         | OAS1     | 6.667103186 | 7.470545595 | 7.674505119 | 8.603381212 | 6.409451036 | 6.112021568 | 2.329750565 | 9.464295978 | 7.071178959 | 8.954178137 |
| ENSMUSG00000042015 | 0.006393571  | 4.221014115  | 0.000538073 | 0.981493606 | 0.999071534 | Wdr41         | Wdr41         | WDR41    | 18.59770889 | 20.92938568 | 17.97449883 | 13.94580342 | 24.98377853 | 29.17762677 | 22.06791508 | 14.99089217 | 9.271101302 | 17.32012559 |
| ENSMUSG00000022370 | 0.006614145  | 7.348959169  | 0.000534651 | 0.981552546 | 0.999071534 | Mrpl13        | Mrpl13        | MIRPL13  | 203.5220973 | 129.0151366 | 70.5221181  | 205.093507  | 131.7207591 | 141.9589771 | 251.0953387 | 108.7357801 | 130.1096928 | 153.2014128 |
| ENSMUSG00000020846 | 0.005907992  | 4.493384199  | 0.000533509 | 0.981572252 | 0.999071534 | Fam101b       | Fam101b       | FAM101B  | 22.03653053 | 28.34064123 | 28.34181276 | 18.10872981 | 19.35915823 | 37.18146454 | 20.90303979 | 16.78703593 | 17.04939816 | 19.28089453 |
| ENSMUSG00000054091 | 0.006724394  | 7.682860294  | 0.000525185 | 0.981716554 | 0.999071534 | 1810037117Rik | 1810037117Rik | C4orf3   | 251.5252402 | 148.8773015 | 219.3292779 | 270.1045408 | 167.7575705 | 141.1585934 | 254.0075269 | 185.7627145 | 202.9428361 | 186.6652026 |
| ENSMUSG00000086130 | 0.010001975  | 2.014983385  | 0.00052015  | 0.981804381 | 0.999071534 | Gm16211       | Gm16211       |          | 6.175842952 | 4.506043375 | 2.356207712 | 3.469105327 | 3.793348573 | 4.438491853 | 3.106334087 | 2.486968286 | 3.221314859 | 5.751588876 |
| ENSMUSG00000020841 | -0.005004332 | 6.66095488   | 0.000507378 | 0.982029126 | 0.999071534 | Cpd           | Cpd           | CPD      | 95.51502565 | 108.204331  | 107.5777121 | 96.78803864 | 117.9208186 | 156.2203608 | 98.3025308  | 79.44482025 | 84.77557885 | 77.18893708 |
| ENSMUSG00000021675 | -0.022870392 | -0.421009026 | 0.000506793 | 0.982039495 | 0.999071534 | F2rl2         | F2rl2         | F2RL2    | 0.842160403 | 1.067220799 | 0.269280881 | 0.555056852 | 0.457817931 | 0.436572969 | 0.711868228 | 1.796143762 | 0           | 0           |
| ENSMUSG00000097471 | -0.018149551 | 0.276985309  | 0.000503859 | 0.982091554 | 0.999071534 | 5830432E09Rik | 5830432E09Rik |          | 1.614140771 | 1.304380977 | 1.548365068 | 0           | 1.24264867  | 1.746291877 | 1.423736457 | 0.207247357 | 1.257098482 | 0.588230681 |
| ENSMUSG00000030189 | -0.005948761 | 8.440735655  | 0.000501814 | 0.982127916 | 0.999071534 | Ybx3          | Ybx3          | YBX3     | 299.247663  | 297.8731831 | 491.6395692 | 334.4911357 | 382.0817648 | 437.9554502 | 283.3235549 | 320.0590019 | 332.3454111 | 299.1479805 |
| ENSMUSG00000020621 | 0.007245817  | 3.637172645  | 0.000501752 | 0.982129014 | 0.999071534 | Rdh14         | Rdh14         | RDH14    | 15.29924731 | 7.411255551 | 12.38692054 | 17.62305506 | 10.59521498 | 10.55051342 | 11.84289871 | 12.84933615 | 11.70672961 | 11.69925465 |
| ENSMUSG00000069622 | -0.022521424 | 4.961352123  | 0.000499163 | 0.982175173 | 0.999071534 | Gm10273       | Gm10273       | TIMM23   | 12.84294614 | 29.70431225 | 0           | 43.71072713 | 75.99777657 | 35.94450779 | 60.44408411 | 24.24794079 | 0           | 35.22848187 |
| ENSMUSG00000032673 | 0.007288183  | 3.612791154  | 0.000494755 | 0.982254039 | 0.999071534 | Prorsd1       | Prorsd1       |          | 15.43960738 | 12.98451973 | 9.89607239  | 14.50086027 | 9.679579116 | 9.09527019  | 18.8321504  | 12.43484143 | 8.32827744  | 9.542408818 |
| ENSMUSG00000041361 | -0.010111987 | 1.982006396  | 0.000493234 | 0.982281338 | 0.999071534 | Myzap         | Myzap         | GCOM1    | 3.719541778 | 6.46261484  | 4.645095204 | 1.942698983 | 3.204725518 | 5.602686437 | 4.983077598 | 2.141556024 | 2.278490998 | 3.856178906 |
| ENSMUSG00000036398 | -0.00476391  | 6.052584502  | 0.000491581 | 0.982311048 | 0.999071534 | Ppp1r11       | Ppp1r11       | PPP1R11  | 71.02219394 | 59.58649463 | 71.02283246 | 60.29305059 | 83.32286347 | 61.77507513 | 76.94648395 | 70.53318389 | 44.46985879 | 66.01255415 |
| ENSMUSG00000072437 | -0.014528524 | 0.229058972  | 0.000491355 | 0.98231512  | 0.999071534 | Nanos1        | Nanos1        | NANOS1   | 1.543960738 | 0.711480533 | 1.279084186 | 0.901967385 | 0.981038424 | 1.45524323  | 1.48845175  | 1.243484143 | 0.235705965 | 0.71894861  |
| ENSMUSG00000036528 | -0.019266958 | 0.049673443  | 0.000490059 | 0.982338456 | 0.999071534 | Ppflbp2       | Ppflbp2       | PPF1BP2  | 2.456301174 | 0.5336104   | 0           | 0.763203172 | 0.981038424 | 1.819054038 | 1.100159989 | 0.27632981  | 0.31427462  | 1.045743432 |
| ENSMUSG00000028121 | 0.005086673  | 4.885398848  | 0.000474036 | 0.98262954  | 0.999071534 | Bcar3         | Bcar3         | BCAR3    | 23.29977114 | 27.09555029 | 36.28559876 | 28.09975315 | 37.73727804 | 32.16087539 | 23.815228   | 31.43251584 | 22.15636074 | 33.136995   |
| ENSMUSG00000030934 | 0.004608589  | 6.492554572  | 0.000472479 | 0.982658088 | 0.999071534 | Oat           | Oat           | OAT      | 92.00602397 | 98.24360358 | 84.41955631 | 89.71106377 | 101.9625935 | 115.5463125 | 102.4443096 | 86.56031285 | 68.19759262 | 66.92757965 |
| ENSMUSG00000006932 | 0.00540803   | 9.267584861  | 0.000470007 | 0.9827035   | 0.999071534 | Ctnnb1        | Ctnnb1        | CTNNB1   | 553.8608247 | 618.8101935 | 644.1871885 | 681.748579  | 688.5581685 | 726.4574206 | 503.2908374 | 622.2256487 | 520.2030654 | 613.6553177 |
| ENSMUSG00000030872 | -0.005295458 | 4.774817394  | 0.000456614 | 0.982951673 | 0.999071534 | Gga2          | Gga2          | GGA2     | 25.40517214 | 36.70053749 | 26.72612748 | 21.85536356 | 31.52403469 | 39.29156722 | 24.8506727  | 31.43251584 | 14.22092657 | 25.09784237 |
| ENSMUSG00000003235 | -0.005126667 | 5.918248919  | 0.000442187 | 0.983223125 | 0.999071534 | Elf2b5        | Elf2b5        | EIF2B5   | 74.18029545 | 68.12426102 | 55.87578288 | 56.54641684 | 59.71253874 | 90.44336677 | 85.81247915 | 48.63404649 | 28.67755911 | 47.64668512 |
| ENSMUSG00000036502 | 0.008034021  | 2.367840193  | 0.000436568 | 0.983330045 | 0.999071534 | Tmem255a      | Tmem255a      | TMEM255A | 5.54422265  | 3.853852886 | 7.270583797 | 3.81601586  | 5.624620297 | 7.421740475 | 5.047792891 | 4.214029596 | 3.69272679  | 4.444409586 |
| ENSMUSG00000067150 | 0.008531322  | 4.020011999  | 0.000432607 | 0.983405825 | 0.999071534 | Xpo5          | Xpo5          | XPO5     | 18.94860906 | 24.60536843 | 14.27188671 | 9.505348597 | 16.54684808 | 44.02110772 | 17.79670571 | 8.35897674  | 7.306884924 | 7.058768167 |
| ENSMUSG00000026248 | 0.006342629  | 4.038579841  | 0.000422457 | 0.983601624 | 0.999071534 | Mrpl44        | Mrpl44        | MIRPL44  | 19.22932919 | 13.63671021 | 12.38692054 | 20.67586775 | 18.31271725 | 15.78938905 | 21.8737692  | 11.81309936 | 8.01400282  | 22.48348379 |
| ENSMUSG00000038848 | 0.004312493  | 5.455067877  | 0.000419772 | 0.98365382  | 0.999071534 | Ythdf1        | Ythdf1        | YTHDF1   | 38.66919848 | 41.02871073 | 51.49996856 | 47.80427141 | 47.22064947 | 59.22839948 | 41.87079488 | 34.19581393 | 34.09879631 | 44.96696758 |

|                     |              |              |             |             |             |               |               |          |             |             |             |             |             |             |             |             |             |             |
|---------------------|--------------|--------------|-------------|-------------|-------------|---------------|---------------|----------|-------------|-------------|-------------|-------------|-------------|-------------|-------------|-------------|-------------|-------------|
| ENSMUSG00000005871  | 0.004649518  | 5.461856375  | 0.000418903 | 0.983670741 | 0.999071534 | Apc           | Apc           | APC      | 38.73937852 | 42.15522157 | 52.84637297 | 46.97168613 | 46.56662386 | 59.22839948 | 27.56871502 | 41.65671879 | 38.498641   | 46.99309548 |
| ENSMUSG000000051235 | -0.01054936  | 2.752498597  | 0.000417008 | 0.98370771  | 0.999071534 | Gen1          | Gen1          | GEN1     | 9.755024662 | 3.438822576 | 10.23267349 | 5.82809695  | 5.166802366 | 14.11585934 | 11.77818341 | 1.657978857 | 2.514196963 | 3.856178906 |
| ENSMUSG000000025225 | -0.004793953 | 6.263110416  | 0.000415478 | 0.983737631 | 0.999071534 | Nfkb2         | Nfkb2         | NFKB2    | 84.70730049 | 66.70129996 | 93.03654451 | 66.60682229 | 88.48966584 | 114.0910693 | 44.6535525  | 70.8095137  | 65.76196342 | 79.14970602 |
| ENSMUSG000000032911 | -0.016058844 | 0.751263334  | 0.000411382 | 0.983817965 | 0.999071534 | Cspg4         | Cspg4         | CSPG4    | 1.263240604 | 1.067220799 | 2.288887492 | 1.873316877 | 1.504258917 | 2.473913492 | 3.365195261 | 0.138164905 | 0           | 1.895409971 |
| ENSMUSG000000097971 | -0.004638364 | 5.677316274  | 0.000402366 | 0.983996259 | 0.999071534 | Gm26917       | Gm26917       |          | 62.03914965 | 50.98943819 | 46.6529127  | 65.35794437 | 39.11073183 | 57.55486976 | 53.00182536 | 38.06443127 | 52.24815564 | 43.39835243 |
| ENSMUSG000000027555 | -0.005802399 | 4.04862077   | 0.000396248 | 0.984118369 | 0.999071534 | Car13         | Car13         | CA13     | 19.72058943 | 17.90559341 | 20.86926831 | 12.21125075 | 14.97718661 | 17.31739444 | 19.67344922 | 21.96821986 | 9.035395336 | 11.89533154 |
| ENSMUSG000000027936 | -0.004795265 | 4.970609471  | 0.000395289 | 0.984137605 | 0.999071534 | Crtc2         | Crtc2         | CRTC2    | 35.86199714 | 35.69260673 | 35.34311568 | 23.86744465 | 32.17806031 | 38.12737264 | 18.24971276 | 36.06104015 | 24.51342039 | 34.31345637 |
| ENSMUSG000000036430 | 0.004742797  | 4.693418475  | 0.00039421  | 0.984159264 | 0.999071534 | Tbcc          | Tbcc          | TBCC     | 25.68589228 | 22.35234674 | 23.42743668 | 28.37728158 | 33.48611154 | 23.21112953 | 23.49165153 | 23.97161098 | 22.86347863 | 29.67296989 |
| ENSMUSG000000051146 | -0.014178281 | 1.090511084  | 0.000389542 | 0.984253328 | 0.999071534 | Camk2n2       | Camk2n2       | CAMK2N2  | 2.315941107 | 2.193731643 | 1.144443746 | 2.636520049 | 2.027479409 | 5.675448599 | 2.912188207 | 0.690824524 | 0           | 1.30717929  |
| ENSMUSG000000069117 | 0.00627658   | 9.02984492   | 0.000388683 | 0.984270692 | 0.999071534 | Gm10260       | Gm10260       |          | 816.1236101 | 596.5764268 | 392.7461655 | 409.8401034 | 506.8698524 | 470.771185  | 925.1051203 | 442.54219   | 273.2617824 | 444.0488048 |
| ENSMUSG000000052125 | 0.007761097  | 2.812842836  | 0.00038726  | 0.984299515 | 0.999071534 | F730043M19Rik | F730043M19Rik |          | 6.73728322  | 6.403324796 | 8.347707322 | 8.464616999 | 5.559217736 | 6.475832375 | 2.912188207 | 8.151729382 | 6.285492408 | 9.150255031 |
| ENSMUSG000000028173 | -0.005360152 | 8.630116465  | 0.00038524  | 0.984340508 | 0.999071534 | Wls           | Wls           | WLS      | 329.4952575 | 419.239904  | 383.1866942 | 514.3295558 | 403.1413897 | 307.9294676 | 405.8296054 | 439.7788919 | 347.4305928 | 377.1865842 |
| ENSMUSG000000063810 | 0.00732145   | 3.234780574  | 0.000381438 | 0.984417956 | 0.999071534 | Alms1         | Alms1         | ALMS1    | 9.755024662 | 17.72772328 | 6.597381593 | 4.926129565 | 9.41796887  | 11.78747017 | 8.73656462  | 11.81309936 | 5.735511822 | 7.516280918 |
| ENSMUSG000000082588 | 0.011734418  | 0.678719228  | 0.000380315 | 0.984440906 | 0.999071534 | Gm15443       | Gm15443       |          | 2.456301174 | 2.490181865 | 0.807842644 | 0.763203172 | 1.111843547 | 1.018670261 | 2.200319978 | 1.381649048 | 0.785686551 | 1.699333077 |
| ENSMUSG000000058607 | -0.020075977 | -0.474222067 | 0.000376625 | 0.984516563 | 0.999071534 | Rpl31-ps20    | Rpl31-ps20    |          | 0           | 0.5336104   | 0.134640441 | 1.665170557 | 0.654025616 | 0.291048646 | 1.164875283 | 1.036236786 | 0.235705965 | 0.065358965 |
| ENSMUSG000000026573 | -0.011187422 | 0.588252325  | 0.00037104  | 0.984631781 | 0.999071534 | Xcl1          | Xcl1          | XCL1     | 1.824680872 | 1.126510844 | 0.807842644 | 1.387642131 | 2.027479409 | 0.800383777 | 1.164875283 | 1.72706131  | 1.414235792 | 1.30717929  |
| ENSMUSG000000036678 | 0.004591188  | 5.014871138  | 0.000370167 | 0.984649858 | 0.999071534 | Aaas          | Aaas          | AAAS     | 34.38821644 | 27.68845074 | 44.96990719 | 22.61856673 | 37.93348573 | 46.49502121 | 29.12188207 | 23.62619872 | 24.43485174 | 34.90168705 |
| ENSMUSG000000031824 | 0.005360573  | 4.375293387  | 0.000368139 | 0.984691973 | 0.999071534 | 6430548M08Rik | 6430548M08Rik | KIAA0513 | 22.24707063 | 20.39577528 | 19.38822346 | 18.94131509 | 26.16102464 | 39.50985371 | 12.74891282 | 14.23098519 | 15.47802505 | 21.43774036 |
| ENSMUSG000000028271 | 0.004106406  | 5.745746057  | 0.000366135 | 0.984733688 | 0.999071534 | Gtf2b         | Gtf2b         | GTF2B    | 56.42474697 | 40.67297046 | 58.29931082 | 62.37451379 | 58.99311056 | 54.35333466 | 62.70911938 | 52.70991118 | 43.76274089 | 44.64017276 |
| ENSMUSG000000074516 | 0.005619412  | 6.727829736  | 0.000358585 | 0.98489188  | 0.999071534 | Gm10709       | Gm10709       | RPL29    | 90.32170317 | 74.64616591 | 163.5208152 | 127.4549297 | 89.14369146 | 92.33518297 | 58.89091707 | 113.4333868 | 93.02528764 | 147.8419777 |
| ENSMUSG000000025809 | -0.005505946 | 10.41513802  | 0.000356225 | 0.984941686 | 0.999071534 | Itgb1         | Itgb1         | ITGB1    | 1267.100506 | 2004.299951 | 1179.854182 | 1159.999439 | 1512.499639 | 1726.573331 | 2028.177298 | 1228.493251 | 741.2166922 | 1006.070541 |
| ENSMUSG000000022757 | -0.005141754 | 6.379958491  | 0.000355904 | 0.984948469 | 0.999071534 | Tfg           | Tfg           | TFG      | 60.98644915 | 65.63407916 | 117.002543  | 98.31444498 | 88.35886072 | 79.67456687 | 51.6428042  | 93.39947564 | 94.28238612 | 72.48309164 |
| ENSMUSG000000022468 | 0.022340925  | -0.683043151 | 0.000353947 | 0.984989909 | 0.999071534 | Endou         | Endou         | ENDOU    | 0.210540101 | 0.059290044 | 0.336601102 | 1.80393477  | 0.130805123 | 0.145524323 | 0.19414588  | 0.27632981  | 1.571373102 | 0           |
| ENSMUSG000000096211 | 0.028491823  | -0.801894776 | 0.000348985 | 0.985095466 | 0.999071534 | Gm23330       | Gm23330       |          | 0           | 0           | 0.673202203 | 1.595788451 | 0           | 0           | 0           | 0.345412262 | 1.178529826 | 0.457512752 |
| ENSMUSG000000025580 | 0.00426365   | 6.58449374   | 0.00034772  | 0.985122499 | 0.999071534 | Elf4a3        | Elf4a3        |          | 105.9718506 | 79.50794955 | 107.6450323 | 99.21641237 | 104.2516832 | 134.4644745 | 116.8111047 | 66.3191543  | 61.20498232 | 95.750883   |
| ENSMUSG000000020288 | 0.004317752  | 5.887710035  | 0.000347336 | 0.985130723 | 0.999071534 | Ahsa2         | Ahsa2         | AHSA2    | 40.35351929 | 55.55477161 | 70.01302916 | 63.83153803 | 75.86697145 | 55.88134005 | 48.34232423 | 56.1640338  | 53.74096009 | 68.62691273 |
| ENSMUSG000000045377 | -0.007490673 | 2.711134647  | 0.000346499 | 0.985187259 | 0.999071534 | Tmem88        | Tmem88        | TMEM88   | 6.947823321 | 6.403324796 | 10.29999371 | 3.677251647 | 6.213243352 | 6.548594537 | 8.089411685 | 3.315957715 | 4.242707375 | 8.954178137 |
| ENSMUSG000000095028 | -0.012416715 | 2.301911392  | 0.000344372 | 0.985194294 | 0.999071534 | Sirpb1b       | Sirpb1b       | SIRPB1   | 8.070703857 | 1.363671021 | 5.183656966 | 6.938210655 | 3.27012808  | 4.947826984 | 2.653327033 | 5.595678644 | 0.078568655 | 10.58815225 |
| ENSMUSG000000025646 | 0.005869282  | 3.297529297  | 0.000339763 | 0.985293702 | 0.999071534 | Atrip         | Atrip         | ATRI P   | 11.0884453  | 7.52983564  | 12.31960032 | 7.354503294 | 12.16487646 | 13.6065242  | 10.22501637 | 8.220811835 | 7.542590889 | 8.039152634 |
| ENSMUSG000000028318 | 0.00742988   | 3.68225787   | 0.000339556 | 0.985298185 | 0.999071534 | Polr1e        | Polr1e        | POLR1E   | 19.51004932 | 7.766995817 | 16.49345398 | 12.6969255  | 9.287163747 | 20.15511874 | 22.00319978 | 5.319348834 | 4.714119306 | 12.1567674  |
| ENSMUSG000000047894 | 0.01334337   | -0.27437769  | 0.000336871 | 0.985356416 | 0.999071534 | Ang2          | Ang2          |          | 0.631620302 | 0.415030311 | 1.077123525 | 0.693821065 | 0.784830739 | 0.436572969 | 0.582437641 | 0.690824524 | 1.021392516 | 0.522871716 |
| ENSMUSG000000038244 | 0.004856411  | 5.628673515  | 0.000332693 | 0.985447487 | 0.999071534 | Mical2        | Mical2        | MICAL2   | 38.94991862 | 74.88332609 | 53.85617627 | 37.39695543 | 51.47181598 | 92.99004243 | 37.7290161  | 52.84807608 | 27.97044121 | 37.31996873 |
| ENSMUSG000000052712 | -0.003731624 | 5.829898246  | 0.00032889  | 0.985530895 | 0.999071534 | BC004004      | BC004004      | C6orf89  | 67.86409243 | 65.10046876 | 58.29931082 | 53.56298626 | 50.42537499 | 58.71906435 | 68.14520403 | 47.32147989 | 42.81991703 | 57.38517084 |
| ENSMUSG000000049744 | -0.009678937 | 2.143755905  | 0.00032396  | 0.985639738 | 0.999071534 | Arhgap15      | Arhgap15      | ARHGAP15 | 6.105662918 | 5.395394041 | 3.635291898 | 4.440454819 | 2.746907587 | 7.494502637 | 5.436084652 | 2.486968286 | 4.949825271 | 0.522871716 |
| ENSMUSG000000019715 | 0.004761118  | 4.629569071  | 0.000323945 | 0.985640081 | 0.999071534 | Gle1          | Gle1          | GLE1     | 33.475876   | 20.92938568 | 20.12874588 | 27.89160683 | 25.11458365 | 34.85307537 | 31.58106322 | 16.51070612 | 20.27071302 | 16.46492042 |
| ENSMUSG000000025224 | 0.006406269  | 4.223890341  | 0.000318563 | 0.985759852 | 0.999071534 | Gbf1          | Gbf1          | GBF1     | 22.03653053 | 24.78323856 | 14.33920693 | 11.23990126 | 24.5259606  | 39.87366451 | 15.01394809 | 15.12905707 | 5.264099892 | 20.65343278 |
| ENSMUSG000000031934 | -0.004859668 | 3.959055866  | 0.00031659  | 0.985804005 | 0.999071534 | Panx1         | Panx1         | PANX1    | 17.96608859 | 12.56948941 | 16.35881354 | 16.16603083 | 17.13547114 | 21.90141062 | 18.8321504  | 11.605852   | 10.44963113 | 13.13715187 |
| ENSMUSG000000050957 | -0.005672468 | 4.572432398  | 0.000314769 | 0.985844896 | 0.999071534 | Insl6         | Insl6         | INSL6    | 29.89669429 | 15.71186177 | 19.45554368 | 33.99723221 | 23.28331193 | 13.6065242  | 19.47930334 | 20.72473572 | 23.25632191 | 33.79058465 |
| ENSMUSG000000044339 | 0.005547869  | 3.503367111  | 0.000313595 | 0.985871308 | 0.999071534 | Alkbh2        | Alkbh2        | ALKBH2   | 12.07096577 | 12.21374915 | 11.37711724 | 12.6969255  | 9.548773993 | 9.750129644 | 8.412988152 | 10.56961522 | 9.899650542 | 14.96720287 |

|                     |              |              |             |             |             |               |               |              |             |             |             |             |             |             |             |             |             |             |
|---------------------|--------------|--------------|-------------|-------------|-------------|---------------|---------------|--------------|-------------|-------------|-------------|-------------|-------------|-------------|-------------|-------------|-------------|-------------|
| ENSMUSG00000057133  | -0.006023549 | 4.209461916  | 0.000312721 | 0.985891015 | 0.999071534 | Chd6          | Chd6          | CHD6         | 11.79024564 | 21.52228612 | 20.66730764 | 16.09664872 | 25.63780415 | 13.6065242  | 9.513148141 | 31.29435093 | 13.43524002 | 19.34625349 |
| ENSMUSG00000034154  | -0.004565671 | 4.370449333  | 0.000312237 | 0.985901934 | 0.999071534 | Ino80         | Ino80         | INO80        | 26.10697248 | 23.24169741 | 24.63920065 | 14.08456763 | 19.29375567 | 28.7410538  | 14.30207986 | 20.37932346 | 15.00661312 | 22.22204793 |
| ENSMUSG00000025269  | -0.005197016 | 3.906530768  | 0.000310035 | 0.985951727 | 0.999071534 | Apex2         | Apex2         | APEX2        | 18.24680872 | 12.98451973 | 15.68561134 | 14.77838869 | 15.69661478 | 19.79130793 | 14.75508691 | 13.26383086 | 6.206923753 | 19.73840728 |
| ENSMUSG00000014329  | -0.005379067 | 5.889609053  | 0.00030752  | 0.98600881  | 0.999071534 | Bicc1         | Bicc1         | BICC1        | 38.94991862 | 54.54684085 | 78.0914556  | 80.06695096 | 53.49929539 | 48.9689347  | 26.66270091 | 58.30558982 | 68.04045531 | 75.03209125 |
| ENSMUSG00000029131  | 0.00460391   | 7.777400147  | 0.000307228 | 0.986015454 | 0.999071534 | Dnajb6        | Dnajb6        | DNAJB6       | 216.1545033 | 227.6737705 | 212.7992165 | 219.1780746 | 261.4140387 | 166.698112  | 224.1090613 | 275.8462324 | 157.6087221 | 226.1420172 |
| ENSMUSG00000014778  | -0.004135334 | 5.816477718  | 0.000305173 | 0.986062297 | 0.999071534 | Fhod1         | Fhod1         | FHOD1        | 77.89983723 | 49.86292735 | 62.13656338 | 39.06212599 | 65.14095135 | 86.2231614  | 47.17744895 | 41.24222408 | 35.98444403 | 68.03868205 |
| ENSMUSG00000020329  | -0.004227954 | 4.624456843  | 0.000299952 | 0.986182024 | 0.999071534 | Polrmt        | Polrmt        | POLRMT       | 30.66867466 | 21.16654585 | 28.94769475 | 18.38625824 | 28.97333479 | 32.37916188 | 18.18499747 | 25.00784777 | 17.99222202 | 26.20894477 |
| ENSMUSG00000028007  | 0.00656996   | 4.511542206  | 0.00029963  | 0.986189456 | 0.999071534 | Snx7          | Snx7          | SNX7         | 37.89721811 | 26.02832949 | 18.51306059 | 12.35001497 | 23.80653242 | 31.14220513 | 46.27143484 | 12.43484143 | 7.85686551  | 16.40510009 |
| ENSMUSG00000023988  | 0.005266516  | 4.699285579  | 0.000296165 | 0.986269525 | 0.999071534 | Bysl          | Bysl          | BYSL         | 30.31777449 | 20.92938568 | 30.42873959 | 25.32446889 | 27.01125794 | 55.95410221 | 30.02789617 | 14.23098519 | 12.09957289 | 20.52271485 |
| ENSMUSG00000031072  | -0.004578447 | 4.048392356  | 0.000294282 | 0.986313252 | 0.999071534 | Oraov1        | Oraov1        | ORAOV1       | 17.75554849 | 13.2216799  | 17.36861685 | 16.9986161  | 20.01318385 | 19.35473496 | 12.8783434  | 13.40199576 | 13.1209654  | 20.78415071 |
| ENSMUSG00000041028  | 0.004363849  | 7.691313748  | 0.000292367 | 0.986357834 | 0.999071534 | Ghitm         | Ghitm         | GHITM        | 219.3827849 | 243.1484721 | 184.7266846 | 185.3889887 | 240.9430369 | 193.6201118 | 282.2881102 | 185.2100549 | 152.3446222 | 185.0965875 |
| ENSMUSG00000034041  | 0.005825068  | 3.272852198  | 0.000290981 | 0.986390221 | 0.999071534 | Lyl1          | Lyl1          | LYL1         | 12.28150587 | 5.51397413  | 9.424830848 | 9.64411281  | 12.62269439 | 14.33414582 | 8.154126978 | 7.460904859 | 6.049786443 | 11.30710086 |
| ENSMUSG00000027286  | 0.00564584   | 3.131812316  | 0.0002889   | 0.98643897  | 0.999071534 | Lrrc57        | Lrrc57        | LRRC57       | 11.5095255  | 7.233385418 | 7.135943356 | 9.089055958 | 9.810384239 | 8.876983706 | 11.26046107 | 7.529987311 | 6.049786443 | 8.235229528 |
| ENSMUSG00000028382  | 0.003975337  | 7.045689959  | 0.000288157 | 0.986456407 | 0.999071534 | Ptbp3         | Ptbp3         | PTBP3        | 109.9721126 | 162.8104619 | 153.7593833 | 123.9858244 | 133.6828359 | 164.2969607 | 109.6924224 | 131.1875771 | 119.5029244 | 114.24747   |
| ENSMUSG000000097165 | 0.010893299  | 0.521835703  | 0.000284318 | 0.986546914 | 0.999071534 | 221008F06Rik  | 221008F06Rik  |              | 1.754500839 | 1.185800888 | 1.346404407 | 0.971349492 | 1.504258917 | 1.236956746 | 0.388291761 | 0.039627905 | 0.549980586 | 1.111102397 |
| ENSMUSG00000034110  | -0.008507339 | 1.775202586  | 0.000278283 | 0.98669046  | 0.999071534 | Kctd7         | Kctd7         | KCTD7        | 3.36864161  | 4.091013064 | 1.346404407 | 2.358991623 | 6.082438228 | 5.675448599 | 2.070889391 | 3.315957715 | 1.257098482 | 4.182973728 |
| ENSMUSG00000070407  | 0.009978424  | 1.263291228  | 0.000275089 | 0.986767049 | 0.999071534 | Hs3st3b1      | Hs3st3b1      | HS3ST3B1     | 4.772242281 | 1.956571465 | 0.673202203 | 2.081463196 | 2.289089656 | 5.820972922 | 1.876743511 | 1.243484143 | 0.628549241 | 2.287563758 |
| ENSMUSG00000070632  | -0.017401422 | -0.72145801  | 0.000271391 | 0.986856285 | 0.999071534 | Btbd8         | Btbd8         | BTBD8        | 0.98252047  | 1.007930755 | 0.201960661 | 0           | 0.261610246 | 1.091432423 | 0.388291761 | 0.207247357 | 0           | 0.71894861  |
| ENSMUSG00000006476  | -0.004013002 | 4.609716826  | 0.000270927 | 0.986867533 | 0.999071534 | Nsmf          | Nsmf          | NSMF         | 28.14219345 | 29.6450222  | 27.4666499  | 17.62305506 | 23.87193498 | 30.26905919 | 20.57946333 | 18.58317969 | 19.95643839 | 28.56186749 |
| ENSMUSG00000034659  | 0.005562509  | 6.186542247  | 0.000270057 | 0.986888635 | 0.999071534 | Tmem109       | Tmem109       | TMEM109      | 106.2525708 | 72.39314422 | 69.60910783 | 50.78770199 | 80.11813796 | 137.4477231 | 117.2641118 | 39.92965748 | 22.15636074 | 56.73158119 |
| ENSMUSG00000035632  | 0.004094083  | 5.105835148  | 0.000269277 | 0.986907561 | 0.999071534 | Cnot3         | Cnot3         | CNOT3        | 33.40569597 | 32.8466846  | 35.20847524 | 34.62167117 | 41.79223686 | 49.04169687 | 16.95540689 | 36.40645241 | 29.14897104 | 36.01278944 |
| ENSMUSG00000006517  | 0.005846923  | 3.563814964  | 0.000267966 | 0.986939471 | 0.999071534 | Mvd           | Mvd           | MVD          | 12.91312617 | 10.07930755 | 11.64639812 | 15.19468133 | 10.46440986 | 23.79322682 | 14.17264927 | 5.18118393  | 7.071178959 | 9.215613995 |
| ENSMUSG00000071645  | -0.004333034 | 4.304525987  | 0.000267089 | 0.986960875 | 0.999071534 | Tut1          | Tut1          | RP11-864I4.1 | 21.1241901  | 16.83837261 | 24.1679591  | 16.44355925 | 23.74112986 | 24.0115133  | 11.84289871 | 20.310241   | 15.16375043 | 23.92138101 |
| ENSMUSG00000006019  | 0.004383902  | 3.986489608  | 0.000266594 | 0.986972959 | 0.999071534 | Dhx34         | Dhx34         | DHX34        | 17.33446828 | 18.14275359 | 13.93528561 | 13.59889288 | 18.70513262 | 17.17187012 | 11.38989165 | 17.33969555 | 12.96382809 | 17.05868974 |
| ENSMUSG00000035356  | -0.005731597 | 5.250879806  | 0.000261874 | 0.98708877  | 0.999071534 | Nfkbiz        | Nfkbiz        | NFKBIZ       | 44.84504143 | 34.86254611 | 62.27120382 | 27.61407841 | 28.12310149 | 25.53951869 | 14.23736457 | 64.59209299 | 37.24154252 | 35.62063566 |
| ENSMUSG000000046058 | 0.007430048  | 1.544772531  | 0.000261084 | 0.987108266 | 0.999071534 | Eid2          | Eid2          | EID2         | 2.38612114  | 3.083082309 | 3.433331237 | 2.081463196 | 3.466335765 | 5.020589145 | 2.070889391 | 2.832380548 | 1.728510412 | 2.287563758 |
| ENSMUSG00000010663  | 0.00460566   | 5.681655441  | 0.000259266 | 0.987153228 | 0.999071534 | Fads1         | Fads1         | FADS1        | 54.31934596 | 61.30590592 | 42.74833992 | 46.06971875 | 61.74001815 | 108.1973342 | 60.63822999 | 31.98517546 | 21.5278115  | 40.84935282 |
| ENSMUSG00000038884  | 0.011045987  | 1.182418811  | 0.000258803 | 0.987164696 | 0.999071534 | A230050P20Rik | A230050P20Rik | C19orf66     | 3.228281543 | 1.185800888 | 3.837252559 | 0.069382107 | 2.87771271  | 3.929156722 | 2.9769035   | 1.036236786 | 1.807079067 | 0.915025503 |
| ENSMUSG00000084796  | -0.008846343 | 1.660144255  | 0.00025789  | 0.987187366 | 0.999071534 | A430104N18Rik | Mir142hg      |              | 4.421342113 | 1.245090933 | 3.567971678 | 4.717983245 | 1.700466601 | 2.255627007 | 1.035444696 | 3.385040167 | 3.064177549 | 4.509768551 |
| ENSMUSG00000028788  | -0.00416376  | 8.469945385  | 0.000254128 | 0.987281147 | 0.999071534 | Ptp4a2        | Ptp4a2        | PTP4A2       | 354.7600696 | 319.4547593 | 390.7265589 | 411.5052739 | 360.7605298 | 371.7418832 | 284.4237148 | 317.8483635 | 376.7367012 | 333.9843086 |
| ENSMUSG00000014158  | 0.004116901  | 4.687945951  | 0.000253592 | 0.987294572 | 0.999071534 | Trpv4         | Trpv4         | TRPV4        | 23.58049127 | 26.91768016 | 25.98560505 | 30.04245214 | 25.96481695 | 23.42941601 | 17.79670571 | 20.72473572 | 24.98483232 | 35.3591998  |
| ENSMUSG00000020620  | 0.008889227  | 1.032752263  | 0.000253126 | 0.987306255 | 0.999071534 | Abca8b        | Abca8b        | ABCA8        | 2.737021308 | 1.245090933 | 1.95228639  | 1.734552664 | 2.289089656 | 1.528005392 | 0.776583522 | 2.348803381 | 2.828471584 | 1.437897219 |
| ENSMUSG00000040560  | -0.004296739 | 4.041373992  | 0.00025169  | 0.987342303 | 0.999071534 | Wdr7          | Wdr7          | WDR7         | 14.38690688 | 19.56571465 | 14.67580803 | 15.26406344 | 21.19042996 | 20.2278809  | 12.9430587  | 14.23098519 | 11.07818037 | 21.30702243 |
| ENSMUSG00000024537  | 0.003908125  | 5.529707269  | 0.000250772 | 0.987365414 | 0.999071534 | Psmg2         | Psmg2         | PSMG2        | 43.932701   | 29.88218238 | 64.69473175 | 53.77113258 | 45.52018287 | 58.86458867 | 45.17127485 | 30.25811415 | 37.94866041 | 52.54860746 |
| ENSMUSG00000054598  | -0.015619868 | -0.495172474 | 0.000249858 | 0.987388444 | 0.999071534 | 9130230L23Rik | 9130230L23Rik |              | 0.491260235 | 0.059290044 | 1.548365068 | 0.763203172 | 0.196207685 | 0.072762162 | 0.453007054 | 0.138164905 | 1.492804447 | 0.392153787 |
| ENSMUSG00000038280  | -0.004219837 | 5.557816506  | 0.000249814 | 0.987389566 | 0.999071534 | Ostm1         | Ostm1         | OSTM1        | 54.88078623 | 55.85122183 | 34.60259326 | 40.86606076 | 59.05851312 | 55.2264806  | 79.47038039 | 31.7779281  | 31.34889338 | 31.96053364 |
| ENSMUSG00000078495  | 0.005192972  | 3.606881009  | 0.000247108 | 0.987458035 | 0.999071534 | Gm13157       | Gm13157       |              | 12.84294614 | 12.33232924 | 10.70391503 | 11.17051915 | 15.56580966 | 10.33222694 | 20.70889391 | 11.88218181 | 5.971217787 | 9.86920364  |
| ENSMUSG00000057706  | 0.006010995  | 3.785018988  | 0.000246034 | 0.987485322 | 0.999071534 | Mex3b         | Mex3b         | MEX3B        | 5.193322482 | 15.71186177 | 13.39672385 | 18.31687613 | 17.65869163 | 12.87890259 | 7.895265804 | 15.88896405 | 17.83508471 | 9.477049853 |
| ENSMUSG00000033014  | 0.004001718  | 5.278935072  | 0.000244795 | 0.987516872 | 0.999071534 | Trim33        | Trim33        | TRIM33       | 25.96661241 | 40.25794015 | 46.18167115 | 35.03796381 | 53.36849026 | 47.44092931 | 26.40383974 | 51.25917968 | 32.13457994 | 30.1958416  |

|                    |              |              |             |             |             |               |               |           |             |             |             |             |             |             |             |             |             |             |
|--------------------|--------------|--------------|-------------|-------------|-------------|---------------|---------------|-----------|-------------|-------------|-------------|-------------|-------------|-------------|-------------|-------------|-------------|-------------|
| ENSMUSG0000000706  | -0.006857642 | 2.376645312  | 0.000237314 | 0.987709086 | 0.999071534 | Btn1a1        | Btn1a1        | BTN1A1    | 5.614402683 | 5.217523908 | 2.356207712 | 3.330341114 | 10.07199449 | 4.511254014 | 6.665675228 | 3.315957715 | 3.928432755 | 5.882306805 |
| ENSMUSG00000029670 | -0.00514627  | 3.372495213  | 0.000236372 | 0.987733489 | 0.999071534 | Ing3          | Ing3          | ING3      | 9.895384729 | 11.44297857 | 11.71371834 | 9.019673851 | 11.18383803 | 17.3901566  | 6.018522294 | 12.15851162 | 5.499805857 | 9.934562605 |
| ENSMUSG00000024440 | 0.008387567  | 2.267896991  | 0.000234839 | 0.987773339 | 0.999071534 | Pcdh12        | Pcdh12        | PCDH12    | 8.000523824 | 9.071376794 | 2.558168373 | 2.428373729 | 2.354492217 | 8.804221544 | 6.147952881 | 1.036236786 | 2.435628308 | 5.359435089 |
| ENSMUSG00000035295 | -0.011221633 | 0.180861552  | 0.000226986 | 0.98797949  | 0.999071534 | Wdr38         | Wdr38         | WDR38     | 0.771980369 | 0.296450222 | 2.086926831 | 0.901967385 | 1.177246109 | 0.218286485 | 0.906014109 | 1.72706131  | 1.099961171 | 0.653589645 |
| ENSMUSG00000072974 | -0.01596832  | -0.548171592 | 0.000226746 | 0.987985833 | 0.999071534 | Gm4787        | Gm4787        |           | 0           | 0.118580089 | 0.538561763 | 1.110113705 | 1.046440986 | 0.436572969 | 0.388291761 | 0.552659619 | 0           | 1.30717929  |
| ENSMUSG00000022789 | 0.003491435  | 6.516152181  | 0.000225355 | 0.988022747 | 0.999071534 | Dnm1l         | Dnm1l         | DNM1L     | 70.67129378 | 101.3859759 | 106.9718301 | 79.23436568 | 116.4819622 | 103.4677937 | 66.91561346 | 103.5545961 | 84.14702961 | 81.50262874 |
| ENSMUSG00000059273 | -0.004083509 | 5.164362983  | 0.000222958 | 0.98808662  | 0.999071534 | Zc3h4         | Zc3h4         | ZC3H4     | 39.30081878 | 34.32893571 | 42.07513771 | 32.05453323 | 38.26049853 | 51.29732387 | 14.04321869 | 39.37699786 | 27.97044121 | 41.89509625 |
| ENSMUSG00000097626 | 0.015832171  | -0.395249865 | 0.000215684 | 0.98828254  | 0.999071534 | 4921504A21Rik | 4921504A21Rik |           | 0.070180034 | 0           | 1.211763966 | 1.457024238 | 0.457817931 | 1.164194584 | 0.064715293 | 0.069082452 | 0.942823861 | 0.849666539 |
| ENSMUSG00000053536 | 0.00315505   | 5.252332332  | 0.00021362  | 0.988338737 | 0.999071534 | Cstf2t        | Cstf2t        | CSTF2T    | 42.73964043 | 33.67674522 | 39.11304802 | 43.36381659 | 37.60647292 | 42.9296753  | 34.62268201 | 30.11994924 | 37.39867983 | 37.51604563 |
| ENSMUSG00000041241 | -0.00430795  | 3.694641077  | 0.000211954 | 0.988384285 | 0.999071534 | Mul1          | Mul1          | MUL1      | 17.12392818 | 16.71979252 | 12.18495988 | 8.742145425 | 12.23027902 | 17.17187012 | 14.62565633 | 12.22759407 | 9.428238612 | 9.215613995 |
| ENSMUSG00000050148 | -0.004323473 | 7.172331819  | 0.00020747  | 0.988507806 | 0.999071534 | Ubqln2        | Ubqln2        | UBQLN2    | 106.3929308 | 96.76135247 | 196.5750434 | 184.7645497 | 160.1054708 | 149.8172906 | 83.80630506 | 120.0653023 | 158.7086833 | 170.9790511 |
| ENSMUSG00000006736 | -0.003526616 | 7.34496103   | 0.000203664 | 0.98861371  | 0.999071534 | Tspan31       | Tspan31       | TSPAN31   | 172.0112622 | 171.5853885 | 161.635849  | 159.509463  | 180.2494598 | 129.5894097 | 177.1904735 | 193.016372  | 125.7884168 | 149.7373877 |
| ENSMUSG00000038393 | 0.0036554    | 6.998927592  | 0.00020303  | 0.988631444 | 0.999071534 | Txnip         | Txnip         | TXNIP     | 207.171459  | 116.9199676 | 89.19929195 | 128.0793687 | 122.629803  | 155.85655   | 124.2533635 | 96.92268071 | 109.9961171 | 133.4630055 |
| ENSMUSG00000037152 | -0.003997867 | 6.385295489  | 0.00020139  | 0.988677452 | 0.999071534 | Ndufc1        | Ndufc1        | NDUFC1    | 90.74278337 | 43.99321295 | 101.8554934 | 117.9495811 | 75.99777657 | 67.59604805 | 71.25153812 | 73.98730651 | 90.27538471 | 89.60714034 |
| ENSMUSG00000062867 | 0.003272524  | 6.535679209  | 0.000201323 | 0.988679329 | 0.999071534 | Impdh2        | Impdh2        | IMPDH2    | 106.1823907 | 71.80024378 | 104.0097404 | 98.17568077 | 99.86971156 | 152.2184419 | 88.53052148 | 66.52640166 | 69.2975538  | 83.33267974 |
| ENSMUSG00000030173 | 0.013554621  | -0.363267803 | 0.000198172 | 0.988768278 | 0.999071534 | Klra5         | Klra5         |           | 0.771980369 | 1.007930755 | 0.740522424 | 0.693821065 | 0.065402562 | 0.218286485 | 0.323576467 | 0.483577167 | 0           | 2.091486864 |
| ENSMUSG00000018415 | -0.003282596 | 4.588343053  | 0.000194456 | 0.988874057 | 0.999071534 | Gid4          | Gid4          | GID4      | 25.40517214 | 29.22999189 | 26.25488593 | 19.0800793  | 24.72216828 | 28.23171867 | 18.8968657  | 22.93537419 | 19.79930108 | 25.88214994 |
| ENSMUSG00000090877 | 0.004957705  | 8.067854812  | 0.000193267 | 0.988908128 | 0.999071534 | Hspa1b        | Hspa1b        | HSPA1B    | 180.9943065 | 369.9105871 | 235.2841701 | 238.8132107 | 368.6088372 | 159.7857067 | 129.883594  | 280.820169  | 345.0753332 | 323.1347205 |
| ENSMUSG00000014232 | 0.003717625  | 4.08475693   | 0.000191583 | 0.988956559 | 0.999071534 | Cluap1        | Cluap1        | CLUAP1    | 19.01878909 | 15.53399163 | 23.76403778 | 14.57024238 | 14.45396611 | 16.00767553 | 19.67344922 | 16.99428329 | 11.94243557 | 16.79725388 |
| ENSMUSG00000045867 | 0.005642917  | 2.544215634  | 0.000190729 | 0.988981187 | 0.999071534 | Cradd         | Cradd         | CRADD     | 8.211063924 | 2.96450222  | 6.530061373 | 6.313771696 | 5.493815174 | 4.29296753  | 6.083237587 | 6.286503168 | 3.221314859 | 7.646998847 |
| ENSMUSG00000040022 | 0.004025657  | 3.389355974  | 0.000181166 | 0.989260951 | 0.999071534 | Rab11fip2     | Rab11fip2     | RAB11FIP2 | 12.84294614 | 9.130666839 | 11.04051614 | 9.782877023 | 10.92222779 | 13.67928637 | 10.67802342 | 8.980718811 | 7.149747614 | 10.32671639 |
| ENSMUSG00000025138 | -0.003249387 | 4.64982619   | 0.00017759  | 0.989367475 | 0.999071534 | Sirt7         | Sirt7         | SIRT7     | 35.72163707 | 20.81080559 | 24.57188042 | 24.90817625 | 23.87193498 | 26.63095112 | 27.18042326 | 19.55033403 | 23.9634398  | 22.35276586 |
| ENSMUSG00000021890 | 0.002691716  | 6.321129192  | 0.000175596 | 0.989427344 | 0.999071534 | Eaf1          | Eaf1          | EAF1      | 82.53171945 | 99.48869452 | 80.51498353 | 71.46356975 | 80.70676101 | 93.93595053 | 82.96500624 | 77.09601687 | 62.38351215 | 71.56806613 |
| ENSMUSG00000001227 | 0.004158729  | 3.949762134  | 0.000175424 | 0.989432503 | 0.999071534 | Sema6b        | Sema6b        | SEMA6B    | 19.72058943 | 18.20204363 | 13.19476319 | 11.72557601 | 17.00466601 | 22.55627007 | 20.70889391 | 16.16529386 | 5.735511822 | 11.63389568 |
| ENSMUSG00000024776 | -0.003578077 | 4.256912605  | 0.000175058 | 0.989443535 | 0.999071534 | Stambpl1      | Stambpl1      | STAMBPL1  | 17.40464832 | 22.23376665 | 19.38822346 | 18.10872981 | 21.64824789 | 21.7558863  | 18.18499747 | 26.66582662 | 9.742513232 | 16.53581802 |
| ENSMUSG00000073616 | 0.004234246  | 7.370496575  | 0.000174661 | 0.989455522 | 0.999071534 | Myeov2        | Myeov2        | COPS9     | 254.9640619 | 120.0623399 | 134.43848   | 223.8960578 | 119.5558826 | 102.8129342 | 193.1104357 | 127.664372  | 174.5795516 | 178.4299731 |
| ENSMUSG00000096035 | 0.007468437  | 1.85273033   | 0.000173803 | 0.989481445 | 0.999071534 | Gm1045        | Gm1045        |           | 3.649361744 | 4.921073686 | 4.039213221 | 1.873316877 | 3.597140888 | 6.112021568 | 7.830550511 | 1.519813953 | 0.707117896 | 1.633974113 |
| ENSMUSG00000037531 | -0.003387606 | 4.486559163  | 0.000171132 | 0.989562566 | 0.999071534 | Mrpl47        | Mrpl47        | MIRPL47   | 25.12445201 | 15.00038123 | 24.36991976 | 26.98963945 | 24.00274011 | 24.52084843 | 29.51017383 | 17.54694291 | 16.81369219 | 19.67304832 |
| ENSMUSG00000024068 | -0.003066211 | 5.620998189  | 0.000170738 | 0.989574592 | 0.999071534 | Spast         | Spast         | SPAST     | 41.68693992 | 44.70469348 | 58.63591192 | 50.37140935 | 59.38552593 | 49.551032   | 34.16967496 | 52.43358137 | 54.13380336 | 42.02581418 |
| ENSMUSG00000040596 | -0.003388449 | 4.153427691  | 0.000170369 | 0.989585854 | 0.999071534 | Pogk          | Pogk          | POGK      | 16.28176778 | 21.28512594 | 17.09933597 | 15.8885024  | 21.38663764 | 20.00959442 | 13.97850339 | 19.20492177 | 17.12796681 | 14.31361323 |
| ENSMUSG00000021901 | -0.002569678 | 5.828741119  | 0.000170088 | 0.989594458 | 0.999071534 | Bap1          | Bap1          | BAP1      | 64.70599093 | 60.95016565 | 53.58689539 | 58.62788003 | 56.76942347 | 65.55870753 | 64.58586289 | 49.1867061  | 41.01283796 | 55.55511983 |
| ENSMUSG00000007880 | 0.003725663  | 6.037108578  | 0.000169675 | 0.989607087 | 0.999071534 | Arid1a        | Arid1a        | ARID1A    | 54.8106062  | 48.26209615 | 95.12347134 | 70.49222025 | 70.04614347 | 77.05512905 | 28.41001384 | 63.4176913  | 63.32633601 | 83.00588492 |
| ENSMUSG00000079562 | 0.002890417  | 6.974086645  | 0.000168891 | 0.989631134 | 0.999071534 | Maea          | Maea          | MAEA      | 141.7636678 | 149.6480721 | 117.8103856 | 108.721761  | 135.2524974 | 139.2667772 | 134.8019563 | 113.157057  | 111.4889216 | 107.0579839 |
| ENSMUSG00000032504 | 0.003149474  | 7.65205108   | 0.000165879 | 0.989724001 | 0.999071534 | Pdcd6ip       | Pdcd6ip       | PDCD6IP   | 195.5215734 | 249.0774766 | 197.1136052 | 176.9243717 | 226.162058  | 274.0950625 | 157.1287326 | 202.4115855 | 159.9657818 | 189.0181253 |
| ENSMUSG00000052397 | -0.003019408 | 6.66415936   | 0.000165511 | 0.989735417 | 0.999071534 | Ezr           | Ezr           | EZR       | 95.93610585 | 103.8168678 | 104.1443809 | 88.11527532 | 135.906523  | 106.0144693 | 72.93413575 | 132.4310612 | 80.1400282  | 95.55480611 |
| ENSMUSG00000031750 | -0.003196081 | 4.963057892  | 0.000164921 | 0.98975373  | 0.999071534 | Ilb4          | Ilb4          | IL34      | 32.8442557  | 22.17447661 | 29.08233519 | 42.46184921 | 34.00933203 | 37.61803751 | 27.11570797 | 21.27739534 | 27.26332332 | 37.05853287 |
| ENSMUSG00000005580 | 0.010135121  | 0.99542135   | 0.000164087 | 0.98977965  | 0.999071534 | Adcy9         | Adcy9         | ADCY9     | 3.719541778 | 4.209593153 | 1.009803305 | 0           | 0.784830739 | 2.255627007 | 3.688771728 | 1.796143762 | 0.471411931 | 1.045743432 |
| ENSMUSG00000025495 | -0.003838167 | 4.493027534  | 0.00015817  | 0.989965629 | 0.999071534 | Ptdss2        | Ptdss2        | PTDSS2    | 31.37047499 | 26.79910007 | 15.68561134 | 15.61097397 | 27.79608868 | 25.68504302 | 34.7521126  | 24.31702324 | 10.99961171 | 14.24825426 |
| ENSMUSG00000031523 | 0.004152561  | 3.427904046  | 0.000157368 | 0.989991076 | 0.999071534 | Dlc1          | Dlc1          | DLC1      | 12.3516859  | 17.84630337 | 9.290190407 | 7.770795933 | 8.044515076 | 13.53376204 | 8.671849326 | 11.74401691 | 7.306884924 | 10.78422914 |

|                     |              |              |             |             |             |               |               |          |  |   |             |             |             |             |             |             |             |             |             |             |
|---------------------|--------------|--------------|-------------|-------------|-------------|---------------|---------------|----------|--|---|-------------|-------------|-------------|-------------|-------------|-------------|-------------|-------------|-------------|-------------|
| ENSMUSG00000036438  | -0.003275758 | 9.605322312  | 0.000155069 | 0.990064463 | 0.999071534 | Calm2         | Calm2         |          |  |   | 794.3677997 | 806.7003442 | 727.5969415 | 860.4075033 | 853.8958442 | 798.9285335 | 1079.321665 | 713.4835683 | 482.5686796 | 716.5303279 |
| ENSMUSG00000028932  | -0.003053411 | 7.596681604  | 0.000151772 | 0.990170637 | 0.999071534 | Psmc2         | Psmc2         | PSMC2    |  |   | 225.8393479 | 166.0714144 | 208.7600033 | 189.482533  | 215.9592584 | 239.6057979 | 231.6807507 | 140.8591204 | 133.6452823 | 200.9788159 |
| ENSMUSG00000026398  | 0.007812485  | 1.411373469  | 0.000150328 | 0.990217524 | 0.999071534 | Nr5a2         | Nr5a2         | NRSa2    |  |   | 3.789721811 | 4.150303108 | 2.625488593 | 0.069382107 | 2.616102464 | 3.34705943  | 1.617882337 | 3.523205072 | 1.178529826 | 2.810435474 |
| ENSMUSG000000061815 | -0.009459477 | 1.165966515  | 0.000147717 | 0.990302853 | 0.999071534 | Rufy4         | Rufy4         | RUFY4    |  |   | 6.807463254 | 1.067220799 | 0.605881983 | 0.346910533 | 2.354492217 | 1.8918162   | 5.241938772 | 1.4507315   | 0.15713731  | 1.699333077 |
| ENSMUSG00000020576  | 0.003331066  | 4.196402735  | 0.00014415  | 0.990420639 | 0.999071534 | Nbas          | Nbas          | NBAS     |  |   | 18.03626862 | 24.01246798 | 16.89737531 | 18.59440456 | 16.80845833 | 33.39783214 | 18.76743511 | 13.40199576 | 11.62816095 | 14.24825426 |
| ENSMUSG00000071291  | 0.005026132  | 2.027598517  | 0.000140291 | 0.990549714 | 0.999071534 | Zfp58         | Zfp58         |          |  |   | 4.140621979 | 5.395394041 | 2.760129034 | 2.705902155 | 5.559217736 | 4.584016176 | 4.788931717 | 3.592287524 | 3.457020824 | 2.679717545 |
| ENSMUSG00000075467  | 0.002856758  | 4.85432965   | 0.000137748 | 0.990635747 | 0.999071534 | Dnlz          | Dnlz          | DNLZ     |  |   | 40.84477952 | 23.00453723 | 31.97710466 | 26.92025734 | 26.81505025 | 28.45000516 | 37.53487022 | 22.72812684 | 21.99922343 | 28.56186749 |
| ENSMUSG00000038569  | 0.008591415  | -0.021378457 | 0.000133157 | 0.990793105 | 0.999071534 | Rad9b         | Rad9b         | RAD9B    |  |   | 0.350900168 | 1.067220799 | 1.346404407 | 0.624438959 | 0.981038424 | 1.236956746 | 0.906014109 | 0.483577167 | 0.078568655 | 1.568615148 |
| ENSMUSG00000035476  | 0.003020225  | 4.298107455  | 0.000132665 | 0.990810149 | 0.999071534 | Tab3          | Tab3          | TAB3     |  |   | 15.79050755 | 22.76737705 | 20.5326672  | 16.9986161  | 25.44159646 | 20.66445387 | 15.27280926 | 25.35326003 | 16.18514295 | 16.60117698 |
| ENSMUSG00000037643  | 0.002287443  | 5.835145088  | 0.000131936 | 0.990835434 | 0.999071534 | Prkci         | Prkci         | PRKCI    |  |   | 56.63528707 | 57.98566343 | 65.50257439 | 55.92197788 | 59.38552593 | 75.89093447 | 59.66750059 | 57.26935303 | 40.54142603 | 45.94735205 |
| ENSMUSG00000017667  | 0.005523704  | 1.716701918  | 0.000129194 | 0.990931147 | 0.999071534 | Zfp334        | Zfp334        | ZNF334   |  |   | 2.38612114  | 4.091013064 | 3.096730136 | 1.942698983 | 4.90519212  | 7.130691829 | 2.912188207 | 2.003391119 | 1.728510412 | 2.352922722 |
| ENSMUSG00000033768  | 0.011788575  | -0.551092278 | 0.000126304 | 0.991033158 | 0.999071534 | Nrxn2         | Nrxn2         | NRXN2    |  | 0 | 0.415030311 | 1.683005509 | 0.20814632  | 0.588623054 | 0.145524323 | 0.19414588  | 0.483577167 | 1.257098482 | 0.392153787 |             |
| ENSMUSG00000061186  | 0.004721174  | 3.002787107  | 0.000124718 | 0.991089631 | 0.999071534 | Sfmbt2        | Sfmbt2        | SFMBT2   |  |   | 5.824942784 | 6.936935196 | 6.664701814 | 10.82360862 | 10.39900729 | 5.74821076  | 2.9769035   | 12.78025369 | 7.228316269 | 8.496665386 |
| ENSMUSG00000006219  | 0.00244464   | 6.362347661  | 0.000122897 | 0.99115492  | 0.999071534 | Fblim1        | Fblim1        | FBLIM1   |  |   | 74.95227582 | 89.76512723 | 87.44896622 | 71.74109817 | 103.2052422 | 108.561145  | 64.78000877 | 99.89322616 | 54.21237202 | 75.55496297 |
| ENSMUSG00000020962  | 0.002579481  | 5.024028554  | 0.000122579 | 0.99116637  | 0.999071534 | Gtf2a1        | Gtf2a1        | GTF2A1   |  |   | 28.35273355 | 30.11934256 | 38.17056493 | 34.41352485 | 36.69083706 | 31.50601594 | 24.91538799 | 29.49820717 | 34.33450228 | 33.79058465 |
| ENSMUSG00000020133  | -0.003154217 | 5.771702663  | 0.00011931  | 0.991284942 | 0.999071534 | 2310011J03Rik | 2310011J03Rik | C19orf25 |  |   | 88.77774243 | 54.66542094 | 44.43134543 | 46.20848296 | 50.42537499 | 69.92443722 | 95.39034259 | 33.71223677 | 30.24893221 | 40.19576317 |
| ENSMUSG00000037395  | 0.003178499  | 4.274439255  | 0.000118583 | 0.99131153  | 0.999071534 | Rcor3         | Rcor3         | RCOR3    |  |   | 13.89564664 | 20.27719519 | 19.99410544 | 21.30030671 | 24.00274011 | 16.88082147 | 13.9137881  | 30.25811415 | 13.67094599 | 15.51620249 |
| ENSMUSG00000089657  | 0.009212332  | -0.30141059  | 0.000117871 | 0.991337682 | 0.999071534 | Gm16585       | Gm16585       |          |  |   | 1.052700503 | 1.126510844 | 0.403921322 | 0.20814632  | 0.719428178 | 0.363810808 | 1.100159989 | 1.036236786 | 0           | 0.784307574 |
| ENSMUSG00000069495  | -0.002716139 | 4.642603769  | 0.000117848 | 0.991338511 | 0.999071534 | Epc2          | Epc2          | EPC2     |  |   | 26.38769261 | 32.8466846  | 23.9659844  | 18.73316877 | 27.73068612 | 34.63478888 | 18.8321504  | 30.25811415 | 18.85647722 | 18.82338178 |
| ENSMUSG00000030486  | 0.010257242  | -0.045637572 | 0.000116416 | 0.991391309 | 0.999071534 | Zfp108        | Zfp108        | ZNF235   |  |   | 0.561440268 | 1.363671021 | 0           | 0.832585279 | 1.569661478 | 1.236956746 | 1.229590576 | 0.828989429 | 0.785686551 | 0           |
| ENSMUSG00000025069  | -0.00744367  | 0.043159255  | 0.000114132 | 0.991476147 | 0.999071534 | Gsto2         | Gsto2         | GSTO2    |  |   | 0.842160403 | 1.363671021 | 0.942483085 | 0.416292639 | 1.111843547 | 0.509335131 | 0.711868228 | 1.312566595 | 0.31427462  | 1.437897219 |
| ENSMUSG00000024330  | 0.005384071  | 2.425212567  | 0.000113301 | 0.991507226 | 0.999071534 | Col11a2       | Col11a2       | COL11A2  |  |   | 4.421342113 | 4.921073686 | 7.674505119 | 4.579219032 | 5.559217736 | 2.110102684 | 1.359021163 | 8.566224097 | 5.028393926 | 7.320240425 |
| ENSMUSG00000040929  | 0.003918859  | 2.644963067  | 0.000105915 | 0.991788703 | 0.999071534 | Rfx3          | Rfx3          | RFX3     |  |   | 5.403862583 | 7.233385418 | 6.933982695 | 4.371072713 | 7.913709953 | 5.020589145 | 4.335924663 | 6.35558562  | 6.992610304 | 6.143742663 |
| ENSMUSG00000030124  | 0.003938172  | 2.793473291  | 0.000105858 | 0.991790914 | 0.999071534 | Lag3          | Lag3          | LAG3     |  |   | 8.211063924 | 6.46261484  | 7.87646578  | 6.313771696 | 6.409451036 | 4.80230266  | 4.206494076 | 6.493750525 | 8.092571475 | 8.235229528 |
| ENSMUSG00000094800  | 0.010872889  | -0.1944348   | 0.000105818 | 0.991792475 | 0.999071534 | Gm9780        | Gm9780        | PLAC9    |  |   | 1.052700503 | 0           | 1.077123525 | 1.248877918 | 0.39241537  | 1.018670261 | 2.329750565 | 0.138164905 | 0.235705965 | 0           |
| ENSMUSG00000089929  | 0.0027179    | 6.28274277   | 0.000105376 | 0.991809629 | 0.999071534 | Bcl2a1b       | Bcl2a1b       | BCL2A1   |  |   | 137.9739459 | 51.76020877 | 66.98361924 | 77.77734144 | 69.39211785 | 67.81433454 | 75.78160866 | 70.60226635 | 66.78335683 | 90.91431963 |
| ENSMUSG00000038145  | -0.00244545  | 5.267481068  | 0.000102798 | 0.991910458 | 0.999071534 | Snrk          | Snrk          | SNRK     |  |   | 41.82729999 | 37.6491782  | 45.97971049 | 37.53571964 | 36.36382425 | 49.18722119 | 20.70889391 | 34.5412262  | 35.12018883 | 46.07806998 |
| ENSMUSG00000040860  | -0.004417151 | 2.818916671  | 9.91E-05    | 0.992055954 | 0.999071534 | Crocc         | Crocc         | CROCC    |  |   | 4.070441945 | 7.233385418 | 9.492151068 | 6.244389589 | 8.960150939 | 5.23887563  | 2.135604685 | 7.599069763 | 8.249708785 | 9.084896066 |
| ENSMUSG00000097343  | 0.00870192   | -0.498766636 | 9.82E-05    | 0.992094229 | 0.999071534 | 9030407P20Rik | 9030407P20Rik |          |  |   | 1.052700503 | 0.118580089 | 0.807842644 | 0.763203172 | 0.196207685 | 1.236956746 | 0.711868228 | 0.552659619 | 0           | 0.457512752 |
| ENSMUSG00000022864  | -0.006258689 | 1.885049098  | 9.74E-05    | 0.992127689 | 0.999071534 | D16Erttd472e  | D16Erttd472e  | C21orf91 |  |   | 6.175842952 | 7.174095373 | 2.423527932 | 0.485674746 | 2.485297341 | 6.985167506 | 4.918362304 | 4.144947144 | 1.178529826 | 0.849666539 |
| ENSMUSG00000026553  | -0.002751281 | 7.299864228  | 9.64E-05    | 0.992167292 | 0.999071534 | Copa          | Copa          | COPA     |  |   | 163.5896582 | 252.279139  | 133.6306374 | 98.80011973 | 175.6058779 | 210.0643603 | 111.6985965 | 196.2632473 | 106.146253  | 146.4694395 |
| ENSMUSG00000049488  | -0.003413139 | 2.829501682  | 9.64E-05    | 0.99216824  | 0.999071534 | Tmem67        | Tmem67        | TMEM67   |  |   | 7.93034379  | 6.225454663 | 6.462741153 | 7.285121188 | 8.371527884 | 6.621356699 | 6.277383467 | 7.391822406 | 4.635550651 | 8.758101244 |
| ENSMUSG00000051669  | -0.00579174  | 1.114642722  | 9.63E-05    | 0.992172176 | 0.999071534 | AU021092      | AU021092      | C16orf89 |  |   | 1.894860906 | 3.913142931 | 0.807842644 | 2.775284262 | 1.111843547 | 2.619437815 | 1.617882337 | 3.108710358 | 1.807079067 | 0.653589645 |
| ENSMUSG00000092486  | 0.002596717  | 4.419919347  | 9.61E-05    | 0.992177162 | 0.999071534 | 2610524H06Rik | 2610524H06Rik |          |  |   | 28.28255352 | 14.34819075 | 24.97580175 | 24.70002993 | 17.72409419 | 25.03018356 | 24.91538799 | 20.310241   | 16.81369219 | 16.27438216 |
| ENSMUSG00000039384  | 0.003799121  | 4.380523262  | 9.36E-05    | 0.992279876 | 0.999071534 | Dusp10        | Dusp10        | DUSP10   |  |   | 13.89564664 | 27.62916069 | 24.10063888 | 16.79046978 | 25.11458365 | 10.04117829 | 9.189571674 | 42.34754332 | 12.80669078 | 23.52922722 |
| ENSMUSG00000058388  | 0.002065144  | 5.247171247  | 9.03E-05    | 0.992416373 | 0.999071534 | Phf1          | Phf1          | PHTF1    |  |   | 42.45892029 | 44.88256362 | 38.43984582 | 31.49947637 | 39.56854977 | 41.40166991 | 33.52252202 | 30.94893867 | 38.97005293 | 36.33958426 |
| ENSMUSG00000029463  | 0.002241447  | 5.203299026  | 9.01E-05    | 0.992426545 | 0.999071534 | Fam216a       | Fam216a       | FAM216A  |  |   | 44.5643213  | 32.13520407 | 38.03592449 | 39.40903652 | 36.102214   | 37.18146454 | 50.47792891 | 25.00784777 | 32.68456052 | 31.37230296 |
| ENSMUSG00000073888  | 0.004524976  | 2.808279183  | 9.01E-05    | 0.992427399 | 0.999071534 | Cc127a        | Cc127a        | CCL27    |  |   | 4.421342113 | 5.869714396 | 8.684308424 | 10.75422652 | 5.493815174 | 2.546675653 | 3.106334087 | 9.878790692 | 6.049786443 | 10.52279329 |
| ENSMUSG00000050108  | -0.009726257 | -0.544349675 | 9.00E-05    | 0.992429838 | 0.999071534 | Bp1fc         | Bp1fc         | BPIFC    |  |   | 0.421080201 | 0.474320355 | 1.009803305 | 0           | 0.981038424 | 0.509335131 | 0.388291761 | 1.519813953 | 0           | 0.261435858 |

|                     |              |              |          |             |             |               |               |          |             |             |             |             |             |             |              |             |             |             |
|---------------------|--------------|--------------|----------|-------------|-------------|---------------|---------------|----------|-------------|-------------|-------------|-------------|-------------|-------------|--------------|-------------|-------------|-------------|
| ENSMUSG00000090115  | -0.003777853 | 2.423246181  | 8.66E-05 | 0.99257432  | 0.999071534 | Usp49         | Usp49         | USP49    | 6.035482885 | 7.944865951 | 3.769932339 | 3.81601586  | 5.75542542  | 5.966497245 | 4.012348196  | 6.010173358 | 2.514196963 | 7.124127131 |
| ENSMUSG00000021973  | -0.001844323 | 6.357624957  | 8.58E-05 | 0.992608976 | 0.999071534 | Micu2         | Micu2         | MICU2    | 87.16360166 | 84.66618341 | 83.61171366 | 86.45010476 | 83.06125323 | 92.26242081 | 83.67687447  | 77.7868414  | 63.09063004 | 79.93401359 |
| ENSMUSG00000020121  | -0.003666902 | 4.408719805  | 8.41E-05 | 0.992684586 | 0.999071534 | Srgap1        | Srgap1        | SRGAP1   | 15.29924731 | 28.28135118 | 21.54247051 | 13.87642131 | 31.39322957 | 10.4049891  | 7.571689937  | 37.5808541  | 14.84947581 | 28.95402128 |
| ENSMUSG00000003549  | 0.002248538  | 4.377282287  | 8.31E-05 | 0.992727504 | 0.999071534 | Erccl         | Erccl         | ERCC1    | 26.38769261 | 20.1586151  | 18.17645949 | 17.9699656  | 24.78757084 | 25.03018356 | 17.40841395  | 16.09621141 | 20.27071302 | 20.78415071 |
| ENSMUSG00000030562  | 0.003220216  | 3.434366641  | 8.27E-05 | 0.992742899 | 0.999071534 | Nox4          | Nox4          | NOX4     | 4.912602348 | 13.69600026 | 11.64639812 | 13.52951078 | 11.24924059 | 8.222124252 | 10.74273872  | 11.12227484 | 7.778296855 | 13.33322876 |
| ENSMUSG00000029427  | -0.002019084 | 4.756191252  | 7.76E-05 | 0.992969764 | 0.999071534 | Zcchc8        | Zcchc8        | ZCCHC8   | 31.72137516 | 23.24169741 | 23.56207712 | 27.19778577 | 34.20553971 | 32.81573485 | 22.39149154  | 25.8368372  | 20.19214436 | 29.60761092 |
| ENSMUSG00000034848  | 0.002055921  | 4.35335416   | 7.66E-05 | 0.993018778 | 0.999071534 | Ttcl21b       | Ttcl21b       | TTC21B   | 22.66815083 | 18.85423412 | 20.80194809 | 17.69243717 | 25.63780415 | 24.73913492 | 19.22044216  | 18.8595095  | 17.20653547 | 18.49658695 |
| ENSMUSG00000052915  | -0.002136668 | 6.715275274  | 7.61E-05 | 0.993039826 | 0.999071534 | Msl1          | Msl1          | MSL1     | 95.65538572 | 95.21981132 | 122.7247617 | 102.1998429 | 129.5624745 | 109.4342909 | 61.80310527  | 113.157057  | 101.824977  | 114.5089058 |
| ENSMUSG00000021115  | -0.002311195 | 4.801869834  | 7.53E-05 | 0.993077131 | 0.999071534 | Vrk1          | Vrk1          | VRK1     | 31.86173523 | 17.01624274 | 34.87187414 | 35.03796381 | 24.72216828 | 38.85499425 | 28.99245148  | 18.79042705 | 25.14196963 | 23.46386826 |
| ENSMUSG00000010609  | 0.003139669  | 2.981375363  | 7.47E-05 | 0.993102399 | 0.999071534 | Psen2         | Psen2         | PSEN2    | 10.80772517 | 4.03172302  | 9.020909526 | 7.215739081 | 9.287163747 | 11.13261071 | 7.118682283  | 6.079255811 | 6.835472994 | 6.797332309 |
| ENSMUSG00000039050  | -0.002236723 | 4.245600704  | 7.42E-05 | 0.993125123 | 0.999071534 | Osbpl2        | Osbpl2        | OSBPL2   | 20.07148959 | 22.76737705 | 17.36861685 | 15.95788451 | 22.04066326 | 22.70179439 | 20.25588686  | 22.86629174 | 10.29249382 | 16.27438216 |
| ENSMUSG00000078490  | -0.006652607 | 0.118497752  | 7.40E-05 | 0.993136226 | 0.999071534 | C030017K20Rik | Cfap74        | CFAP74   | 0.561440268 | 0.177870133 | 1.683005509 | 1.734552664 | 0.784830739 | 0.509335131 | 0.776583522  | 1.105319238 | 1.649941757 | 0.326794823 |
| ENSMUSG00000055862  | -0.003679183 | 2.493761113  | 7.22E-05 | 0.993220613 | 0.999071534 | Izumo4        | Izumo4        | IZUMO4   | 5.75476275  | 3.023792265 | 6.260780492 | 7.63203172  | 5.75542542  | 3.565345915 | 3.106334087  | 6.700997882 | 6.521198373 | 5.686229912 |
| ENSMUSG00000033147  | -0.004057128 | 2.028537915  | 7.12E-05 | 0.993268735 | 0.999071534 | Slc22a15      | Slc22a15      | SLC22A15 | 2.526481208 | 2.96450222  | 4.712415424 | 7.215739081 | 2.812310149 | 4.074681045 | 2.200319978  | 2.763298096 | 5.185531236 | 4.379050622 |
| ENSMUSG00000022863  | -0.009779727 | 2.498635022  | 7.08E-05 | 0.993284938 | 0.999071534 | Btg3          | Btg3          | BTG3     | 1.543960738 | 9.901437416 | 6.530061373 | 0           | 11.11843547 | 12.15128097 | 15.46695514  | 1.312566595 | 0           | 0           |
| ENSMUSG00000035601  | -0.002947898 | 3.025454419  | 6.79E-05 | 0.993424069 | 0.999071534 | Trmt10b       | Trmt10b       | TRMT10B  | 11.5095255  | 6.46261484  | 8.280387102 | 6.105625376 | 9.483371431 | 6.766881022 | 10.095585878 | 9.878790692 | 5.892649132 | 5.751588876 |
| ENSMUSG00000091478  | -0.008567681 | 4.171917066  | 6.71E-05 | 0.993466331 | 0.999071534 | Gm10039       | Gm10039       |          | 30.87921476 | 21.10725581 | 3.769932339 | 3.885397967 | 35.31738326 | 19.8640701  | 58.76148648  | 11.74401691 | 0           | 0           |
| ENSMUSG00000089812  | -0.003755258 | 1.708961162  | 6.38E-05 | 0.993626159 | 0.999071534 | Gm15867       | Gm15867       |          | 2.807201342 | 4.03172302  | 3.029409915 | 3.330341114 | 3.073920395 | 1.964578361 | 2.006174098  | 5.18118393  | 2.357059653 | 3.33330719  |
| ENSMUSG00000079179  | -0.002372889 | 3.873499987  | 6.38E-05 | 0.993628652 | 0.999071534 | 1700012B15Rik | Rab10os       |          | 15.65014748 | 14.8225111  | 15.61829112 | 16.85985189 | 12.23027902 | 12.44232962 | 9.966155196  | 14.64547991 | 16.49941757 | 14.77112598 |
| ENSMUSG00000075600  | 0.003061915  | 3.557852604  | 6.26E-05 | 0.993688386 | 0.999071534 | Zc3h3         | Zc3h3         | ZC3H3    | 12.63240604 | 16.83837261 | 10.43463415 | 5.134275885 | 15.95822503 | 11.56918368 | 8.995425794  | 20.93198308 | 5.106962581 | 10.19599846 |
| ENSMUSG00000041313  | -0.002176946 | 4.442799747  | 6.15E-05 | 0.993745315 | 0.999071534 | Slc7a1        | Slc7a1        | SLC7A1   | 17.19410822 | 27.27342043 | 25.58168373 | 21.92474567 | 20.14398897 | 37.76356183 | 24.00937388  | 12.50392388 | 16.26371161 | 17.05868974 |
| ENSMUSG00000002332  | -0.002522199 | 5.561238013  | 6.01E-05 | 0.99381646  | 0.999071534 | Dhrs1         | Dhrs1         | DHRS1    | 84.35640032 | 68.65787142 | 31.70782378 | 24.00620887 | 38.45670622 | 74.58121556 | 66.91561346  | 27.21848624 | 28.12757853 | 38.10427631 |
| ENSMUSG00000023026  | -0.001977957 | 5.251078113  | 5.90E-05 | 0.993870542 | 0.999071534 | Dip2b         | Dip2b         | DIP2B    | 32.91443573 | 41.20658086 | 44.56598587 | 39.96409337 | 38.06429085 | 46.34949689 | 20.32060215  | 34.6793911  | 45.41268265 | 33.72522568 |
| ENSMUSG000000006676 | 0.001643386  | 6.0119393    | 5.64E-05 | 0.994009733 | 0.999071534 | Usp19         | Usp19         | USP19    | 74.18029545 | 72.27456413 | 57.49146817 | 57.10147369 | 74.10110229 | 91.75308568 | 43.87696898  | 71.43125578 | 46.11980054 | 63.20211868 |
| ENSMUSG00000074912  | 0.00653592   | 0.04974339   | 5.62E-05 | 0.994019992 | 0.999071534 | Gm14207       | Gm14207       |          | 1.263240604 | 1.48225111  | 0           | 0.624438959 | 1.373453794 | 0.582097292 | 0.647152935  | 1.174401691 | 1.492804447 | 0.261435858 |
| ENSMUSG00000022828  | 0.003226835  | 3.23684067   | 5.55E-05 | 0.994054928 | 0.999071534 | Gtf2e1        | Gtf2e1        | GTF2E1   | 16.14140771 | 11.02794826 | 6.328100712 | 7.007592761 | 7.979112515 | 19.93683226 | 13.9137881   | 3.868617334 | 4.478413341 | 5.490153018 |
| ENSMUSG00000026887  | 0.002066153  | 4.50723757   | 5.53E-05 | 0.994067137 | 0.999071534 | Mrrf          | Mrrf          | MRRF     | 25.33499211 | 27.74774078 | 19.25358302 | 21.43907092 | 23.74112986 | 28.30448083 | 33.7166679   | 23.76436362 | 10.13535651 | 16.07830527 |
| ENSMUSG00000022947  | 0.006567396  | 1.443395922  | 5.51E-05 | 0.994077103 | 0.999071534 | Cbr3          | Cbr3          | CBR3     | 10.17610486 | 1.067220799 | 0.875162864 | 0.20814632  | 1.308051232 | 3.929156722 | 6.342098761  | 0.414494714 | 0.078568655 | 2.483640651 |
| ENSMUSG000000083798 | 0.010900554  | -0.031691588 | 5.51E-05 | 0.994077863 | 0.999071534 | Gm14584       | Gm14584       |          | 1.473780704 | 2.727342043 | 0           | 0           | 0.130805123 | 2.473913492 | 2.006174098  | 0           | 0           | 0           |
| ENSMUSG00000036792  | 0.002259261  | 3.583599053  | 5.09E-05 | 0.994306625 | 0.999233613 | Mbd5          | Mbd5          | MBD5     | 10.0357448  | 14.8225111  | 11.30979702 | 9.574730704 | 15.95822503 | 11.56918368 | 8.089411685  | 15.9580465  | 10.44963113 | 10.65351121 |
| ENSMUSG00000097848  | 0.008573678  | -0.781329852 | 4.83E-05 | 0.994455176 | 0.999296474 | Gm807         | Gm807         |          | 1.19306057  | 0.059290044 | 1.009803305 | 0           | 0.065402562 | 0.654859454 | 0.906014109  | 0.690824524 | 0           | 0           |
| ENSMUSG000000031756 | -0.002456936 | 3.54781089   | 4.66E-05 | 0.994555333 | 0.999296474 | Cenpn         | Cenpn         | CENPN    | 14.52726694 | 8.715636528 | 11.51175768 | 13.8070392  | 11.38004572 | 18.69987551 | 18.18499747  | 8.842553906 | 6.521198373 | 5.490153018 |
| ENSMUSG00000020124  | 0.001416356  | 5.773507168  | 4.63E-05 | 0.994571668 | 0.999296474 | Usp15         | Usp15         | USP15    | 56.42474697 | 65.75265925 | 53.11565385 | 39.68656495 | 69.71913066 | 74.65397772 | 51.5780889   | 49.0485412  | 39.44146486 | 53.20219711 |
| ENSMUSG00000026829  | -0.007766626 | -0.069753256 | 4.25E-05 | 0.994800091 | 0.999404672 | Gbg11         | Gbg11         | GBGT1    | 1.403600671 | 2.312311732 | 0.134640441 | 0           | 0.39241537  | 2.983248622 | 0.582437641  | 0.828989429 | 0           | 0           |
| ENSMUSG00000022948  | -0.002653177 | 2.279188782  | 4.22E-05 | 0.994814364 | 0.999404672 | Setd4         | Setd4         | SETD4    | 3.087921476 | 3.913142931 | 6.933982695 | 6.105625376 | 4.316569065 | 5.093351307 | 3.559341141  | 4.766689215 | 4.714119306 | 4.444405986 |
| ENSMUSG000000805030 | 0.003114681  | 1.965262151  | 3.92E-05 | 0.99500316  | 0.999526516 | 2810455O05Rik | 2810455O05Rik |          | 1.263240604 | 2.253021687 | 6.058819831 | 3.330341114 | 6.671061283 | 3.492583753 | 3.300479967  | 3.315957715 | 4.085570065 | 3.725460977 |
| ENSMUSG00000036473  | 0.00171234   | 3.763248372  | 3.69E-05 | 0.995151051 | 0.999561705 | Tbc1d24       | Tbc1d24       | NTN3     | 13.33420637 | 15.41541155 | 14.47384737 | 11.51742969 | 15.17339429 | 14.47967014 | 12.42533635  | 17.96143762 | 8.799689371 | 11.63389568 |
| ENSMUSG00000020261  | -0.001557696 | 4.635794744  | 3.62E-05 | 0.995199344 | 0.999561705 | Slc36a1       | Slc36a1       | SLC36A1  | 27.01931291 | 37.47130807 | 19.25358302 | 19.84328247 | 25.3761939  | 31.14220513 | 18.8968657   | 29.29095982 | 15.47802505 | 26.27430373 |
| ENSMUSG00000027455  | -0.00125677  | 6.736973001  | 3.44E-05 | 0.995321326 | 0.999561705 | Nsfl1c        | Nsfl1c        | NSFL1C   | 115.3759751 | 93.73756021 | 121.916919  | 95.60854282 | 127.7966054 | 128.2069286 | 110.2101448  | 108.5285327 | 76.44730141 | 95.68552404 |

|                     |              |              |          |             |             |               |               |          |             |             |             |             |             |             |             |             |             |             |
|---------------------|--------------|--------------|----------|-------------|-------------|---------------|---------------|----------|-------------|-------------|-------------|-------------|-------------|-------------|-------------|-------------|-------------|-------------|
| ENSMUSG00000046034  | 0.001293569  | 5.112212868  | 3.30E-05 | 0.995419348 | 0.999561705 | Fam105b       | Otulin        | OTULIN   | 44.3537812  | 35.81118682 | 36.75684031 | 28.51604579 | 33.94392947 | 55.44476708 | 32.29293145 | 25.69867229 | 25.45624425 | 31.82981571 |
| ENSMUSG000000026202 | -0.001521378 | 6.667176567  | 3.25E-05 | 0.995448028 | 0.999561705 | Tuba4a        | Tuba4a        | TUBA4A   | 140.8513273 | 79.21149933 | 110.4051614 | 77.56919512 | 121.9103748 | 166.4070634 | 132.8604975 | 67.28630863 | 54.91948991 | 87.31957658 |
| ENSMUSG000000028902 | 0.001205044  | 5.930841516  | 3.24E-05 | 0.99545909  | 0.999561705 | Sf3a3         | Sf3a3         | SF3A3    | 59.02140821 | 49.62576717 | 75.06204568 | 65.42732648 | 66.18739234 | 79.8209119  | 63.74456408 | 46.1470782  | 46.59121247 | 61.56814456 |
| ENSMUSG000000042046 | -0.001792954 | 3.9567733    | 3.17E-05 | 0.995510797 | 0.999561705 | Dstyk         | Dstyk         | DSTYK    | 16.56248792 | 25.13897883 | 11.84835878 | 8.464616999 | 18.63973005 | 23.28389169 | 13.71964222 | 16.71795348 | 7.778296855 | 15.0979208  |
| ENSMUSG000000021819 | 0.001364372  | 6.049855658  | 2.89E-05 | 0.995709664 | 0.999629203 | Zswim8        | Zswim8        | ZSWIM8   | 61.54788942 | 75.41693649 | 76.00452877 | 56.54641684 | 74.23190741 | 70.57929668 | 33.06951497 | 86.56031285 | 53.66239143 | 74.37850161 |
| ENSMUSG000000033075 | 0.001462712  | 5.055595965  | 2.75E-05 | 0.995817777 | 0.999629203 | Senp1         | Senp1         | SENP1    | 41.89748002 | 35.81118682 | 32.04442488 | 24.21435519 | 38.91452415 | 72.6166372  | 30.02789617 | 22.24454967 | 18.62077126 | 25.75143201 |
| ENSMUSG000000004455 | 0.001312882  | 8.168544859  | 2.66E-05 | 0.995884397 | 0.999629203 | Ppp1cc        | Ppp1cc        | PPP1CC   | 303.1777449 | 261.2912257 | 291.2272732 | 309.7217236 | 325.7701593 | 309.0936621 | 348.4918554 | 273.497429  | 185.0291828 | 286.0761876 |
| ENSMUSG000000054199 | 0.001235947  | 5.760296126  | 2.60E-05 | 0.99593149  | 0.999629203 | Gon4l         | Gon4l         | YYIAP1   | 56.2843869  | 57.09631276 | 62.06924316 | 48.01241773 | 57.5542542  | 75.52712366 | 26.66270091 | 50.6374376  | 42.3485051  | 69.47657927 |
| ENSMUSG000000044617 | 0.001563868  | 3.331585166  | 2.35E-05 | 0.99613419  | 0.999629203 | Zbtb39        | Zbtb39        | ZBTB39   | 10.31646493 | 13.10309981 | 7.80914556  | 7.63203172  | 12.9497072  | 16.51701067 | 8.348272859 | 8.428059192 | 6.442629718 | 9.738485711 |
| ENSMUSG000000044147 | 0.001260494  | 7.926034676  | 2.33E-05 | 0.996150112 | 0.999629203 | Arf6          | Arf6          | ARF6     | 225.3480877 | 253.7613901 | 286.8514589 | 221.0513915 | 275.6717971 | 310.9127162 | 167.4831795 | 218.2314671 | 251.3411277 | 221.6976076 |
| ENSMUSG000000037742 | 0.00125522   | 13.17505826  | 2.32E-05 | 0.996154642 | 0.999629203 | Eef1a1        | Eef1a1        |          | 10806.04084 | 11461.8328  | 7525.25619  | 9341.953736 | 8892.655495 | 8936.939727 | 11632.37986 | 8120.987691 | 7206.788458 | 8715.552558 |
| ENSMUSG000000031986 | 0.003972682  | 1.551463722  | 2.17E-05 | 0.996280833 | 0.999629203 | Sprtn         | Sprtn         | SPRTN    | 3.158101509 | 6.344034752 | 0           | 2.01208109  | 3.008517833 | 7.712789121 | 4.788931717 | 1.657978857 | 0.392843275 | 0.261435858 |
| ENSMUSG000000042380 | -0.001365955 | 4.156911768  | 2.16E-05 | 0.996290227 | 0.999629203 | Smim12        | Smim12        | SMIM12   | 21.3347302  | 16.54192239 | 14.33920693 | 21.92474567 | 17.59328907 | 22.92008088 | 27.43928444 | 10.77686257 | 11.86386692 | 14.05217737 |
| ENSMUSG000000042599 | 0.001234153  | 5.695267891  | 2.11E-05 | 0.996336745 | 0.999629203 | Jhdm1d        | Kdm7a         | KDM7A    | 42.03784009 | 57.68921321 | 55.67382222 | 61.19501798 | 50.49077755 | 32.16087539 | 35.26983495 | 63.00319658 | 54.99805857 | 56.01263258 |
| ENSMUSG000000022747 | -0.002236389 | 1.582189731  | 1.99E-05 | 0.996444617 | 0.999629203 | St3gal6       | St3gal6       | ST3GAL6  | 4.982782381 | 2.312311732 | 2.88887492  | 3.122194795 | 2.158284533 | 4.29296753  | 3.947632902 | 1.72706131  | 1.021392516 | 3.33330719  |
| ENSMUSG000000052566 | 0.001347528  | 3.678223339  | 1.73E-05 | 0.996681237 | 0.999629203 | Hook2         | Hook2         | HOOK2    | 13.26402634 | 10.31646773 | 16.02221244 | 11.30928337 | 14.91178404 | 11.56918368 | 7.053966989 | 18.92859196 | 10.05678785 | 13.00643394 |
| ENSMUSG000000023007 | -0.00152983  | 3.927596848  | 1.68E-05 | 0.996726783 | 0.999629203 | Prpf40b       | Prpf40b       | PRPF40B  | 15.08870721 | 12.33232924 | 22.8215547  | 13.32136446 | 14.78097892 | 8.731459383 | 6.018522294 | 21.96821986 | 14.22092657 | 19.67304832 |
| ENSMUSG000000082286 | -0.001186219 | 4.238165622  | 1.43E-05 | 0.996978663 | 0.999629203 | Pisd-ps1      | Pisd-ps1      |          | 20.70310989 | 30.35650274 | 11.2424768  | 13.94580342 | 21.64824789 | 17.46291877 | 16.37296925 | 26.80399153 | 10.37106247 | 19.80376624 |
| ENSMUSG000000061482 | -0.003270003 | -0.362226524 | 1.43E-05 | 0.996982658 | 0.999629203 | Hist1h4d      | Hist1h4d      |          | 0.631620302 | 0.177870133 | 0.201960661 | 1.942698983 | 0.39241537  | 0.291048646 | 0.19414588  | 0.552659619 | 1.492804447 | 0.392153787 |
| ENSMUSG000000015023 | -0.000819271 | 5.519330812  | 1.38E-05 | 0.997038412 | 0.999629203 | Ddx19a        | Ddx19a        | DDX19A   | 59.51266844 | 54.25039063 | 40.66141309 | 37.81324807 | 46.17420849 | 61.48402649 | 52.74296419 | 31.50159829 | 35.74873807 | 42.41796796 |
| ENSMUSG000000020604 | -0.002506383 | 0.621055376  | 1.35E-05 | 0.997065124 | 0.999629203 | Arsg          | Arsg          | ARSG     | 1.824680872 | 1.837991377 | 1.144443746 | 1.040731598 | 1.438856355 | 2.40115133  | 1.876743511 | 0.621742072 | 0.078568655 | 2.156845829 |
| ENSMUSG000000040591 | -0.000994437 | 3.779532387  | 1.29E-05 | 0.997138876 | 0.999629203 | 1110051M20Rik | 1110051M20Rik | C11orf49 | 15.57996745 | 13.39955004 | 10.23267349 | 14.70900659 | 16.74305577 | 14.77071879 | 15.27280926 | 12.98750105 | 10.60676844 | 12.1567674  |
| ENSMUSG000000039886 | -0.001004755 | 5.485352559  | 1.22E-05 | 0.997218461 | 0.999629203 | Tmem120a      | Tmem120a      | TMEM120A | 68.4255327  | 47.78777579 | 37.76664361 | 38.50706913 | 40.3533805  | 48.9689347  | 81.60598508 | 29.56728962 | 24.43485174 | 34.90168705 |
| ENSMUSG000000039197 | 0.000722129  | 5.827515284  | 1.20E-05 | 0.997231197 | 0.999629203 | Adk           | Adk           | ADK      | 58.24942784 | 57.74850325 | 57.62610861 | 62.09698536 | 57.88126701 | 60.39259406 | 71.89869106 | 55.54229172 | 42.74134837 | 43.85586518 |
| ENSMUSG000000042712 | -0.001042832 | 9.555680249  | 1.13E-05 | 0.997316565 | 0.999629203 | Wbp5          | Wbp5          | TCEAL9   | 773.1734295 | 545.8834389 | 916.9687213 | 1025.536917 | 617.4001815 | 467.9334607 | 646.8940736 | 824.291822  | 786.0008256 | 793.5231881 |
| ENSMUSG000000028969 | -0.000730705 | 5.630981658  | 1.13E-05 | 0.997317662 | 0.999629203 | Cdk5          | Cdk5          | CDK5     | 64.77617096 | 41.68090122 | 43.690823   | 51.20399463 | 55.52677479 | 44.16663204 | 55.78458298 | 43.59102746 | 39.67717082 | 53.98650468 |
| ENSMUSG000000044807 | 0.001211273  | 3.331845394  | 1.12E-05 | 0.997325467 | 0.999629203 | Zfp354c       | Zfp354c       | ZNF354C  | 7.018003354 | 11.26510844 | 10.50195437 | 14.57024238 | 7.717502268 | 9.968416129 | 5.824376413 | 9.187966168 | 12.33527885 | 9.542408818 |
| ENSMUSG000000039967 | -0.000933701 | 5.042547624  | 9.99E-06 | 0.997478143 | 0.999629203 | Zfp292        | Zfp292        | ZNF292   | 23.51031124 | 46.83913508 | 33.18886863 | 30.38936267 | 36.62543449 | 27.50409706 | 19.73816451 | 54.78238475 | 27.57759794 | 26.27430373 |
| ENSMUSG000000035172 | -0.000794289 | 4.243743749  | 9.96E-06 | 0.997481651 | 0.999629203 | Plekhh3       | Plekhh3       | PLEKHH3  | 20.42238976 | 18.97281421 | 15.82025178 | 19.0800793  | 23.54492217 | 27.35857273 | 16.24353866 | 17.47786046 | 12.02100423 | 19.80376624 |
| ENSMUSG000000032481 | -0.000742553 | 6.195821101  | 9.75E-06 | 0.99750873  | 0.999629203 | Smarcc1       | Smarcc1       | SMARCC1  | 66.24995166 | 77.13634777 | 85.56400005 | 75.2102035  | 75.34375096 | 125.6602529 | 44.26526074 | 66.18098939 | 58.76935401 | 67.18901551 |
| ENSMUSG000000039834 | -0.000861121 | 4.229804842  | 8.59E-06 | 0.997661868 | 0.999629203 | Zfp335        | Zfp335        | ZNF335   | 24.49283171 | 21.93731643 | 20.39802676 | 12.62754339 | 17.78949675 | 20.88274036 | 9.383717555 | 22.31363212 | 14.92804447 | 22.41812483 |
| ENSMUSG000000020627 | -0.001614631 | 1.467925581  | 8.56E-06 | 0.997665129 | 0.999629203 | Klh29         | Klh29         | KLHL29   | 1.824680872 | 2.01586151  | 3.971893    | 3.885397967 | 1.831271725 | 3.128772945 | 0.970729402 | 3.45412262  | 1.021392516 | 4.379050622 |
| ENSMUSG000000027091 | 0.000604492  | 6.452143732  | 8.27E-06 | 0.997706056 | 0.999629203 | Zc3h15        | Zc3h15        | ZC3H15   | 84.91784059 | 79.27078937 | 90.54569636 | 99.97961554 | 98.03843983 | 107.1059018 | 88.07751443 | 73.5728118  | 76.84014469 | 77.97324465 |
| ENSMUSG000000046556 | 0.000949112  | 3.658931372  | 8.14E-06 | 0.997724107 | 0.999629203 | Zfp319        | Zfp319        | ZNF319   | 10.10592483 | 14.46677084 | 15.14704958 | 10.33793388 | 14.91178404 | 19.35473496 | 6.212668174 | 12.64208879 | 13.51380868 | 8.888819173 |
| ENSMUSG000000058093 | 0.001005024  | 3.52519403   | 7.33E-06 | 0.997839858 | 0.999629203 | AA987161      | Zfp729b       | ZNF729   | 11.43934547 | 15.47470159 | 6.328100712 | 13.32136446 | 12.4264867  | 10.47775126 | 16.56711513 | 15.9580465  | 4.949825271 | 7.581639883 |
| ENSMUSG000000074782 | -0.001493015 | 0.758885469  | 5.76E-06 | 0.998084592 | 0.999629203 | 4833422C13Rik | 4833422C13Rik |          | 2.17558104  | 2.134441599 | 1.683005509 | 1.595788451 | 0.523220493 | 2.182864846 | 1.229590576 | 0.898071881 | 2.671334273 | 0.392153787 |
| ENSMUSG000000026854 | 0.000706206  | 3.528358347  | 5.62E-06 | 0.998108311 | 0.999629203 | Usp20         | Usp20         | USP20    | 14.52726694 | 11.56155866 | 10.56927459 | 10.33793388 | 12.36108414 | 16.0804377  | 8.542418739 | 10.77686257 | 7.778296855 | 12.94107497 |
| ENSMUSG000000078444 | 0.001279756  | 1.057637352  | 5.20E-06 | 0.998180868 | 0.999629203 | Gm10941       | Gm10941       |          | 1.894860906 | 1.897281421 | 1.95228639  | 2.98340582  | 1.308051232 | 2.328389169 | 2.588611739 | 1.312566595 | 2.435628308 | 0.653589645 |
| ENSMUSG000000020590 | 0.000503328  | 5.558462812  | 4.92E-06 | 0.998229917 | 0.999629203 | Snx13         | Snx13         | SNX13    | 40.56405939 | 66.04910947 | 42.20977815 | 37.39695543 | 58.66609775 | 54.06228601 | 55.52572181 | 47.94322196 | 35.82730672 | 34.83632808 |

|                     |              |              |          |             |             |         |         |         |             |             |              |             |             |             |             |             |             |             |
|---------------------|--------------|--------------|----------|-------------|-------------|---------|---------|---------|-------------|-------------|--------------|-------------|-------------|-------------|-------------|-------------|-------------|-------------|
| ENSMUSG00000069769  | -0.000546996 | 4.823708091  | 4.27E-06 | 0.998351636 | 0.999629203 | Msi2    | Msi2    | MSI2    | 21.1241901  | 33.02455473 | 27.803251    | 22.34103831 | 42.70787272 | 33.90716727 | 22.90921389 | 38.27167863 | 16.26371161 | 26.60109855 |
| ENSMUSG000000021794 | 0.00053927   | 8.013774591  | 4.17E-06 | 0.998371551 | 0.999629203 | Glud1   | Glud1   | GLUD1   | 291.1769592 | 308.2489409 | 218.5214352  | 251.7876647 | 272.9902921 | 341.5455862 | 340.7260202 | 235.5020802 | 161.6942922 | 193.397176  |
| ENSMUSG000000021822 | 0.000620322  | 8.761859352  | 4.13E-06 | 0.998377789 | 0.999629203 | Plau    | Plau    | PLAU    | 583.2662588 | 476.5140869 | 540.4467289  | 268.5781345 | 396.9281463 | 523.8148008 | 679.7047274 | 393.7008962 | 217.1637627 | 329.539899  |
| ENSMUSG000000091410 | 0.001706946  | -0.291848822 | 3.97E-06 | 0.998410299 | 0.999629203 | Gm17150 | Gm17150 |         | 0.631620302 | 0.059290044 | 0.1009803305 | 1.665170557 | 0.130805123 | 0.436572969 | 0.517722348 | 0.414494714 | 0.707117896 | 1.176461361 |
| ENSMUSG000000028799 | 0.000789577  | 3.327561219  | 3.88E-06 | 0.998427813 | 0.999629203 | Zfp362  | Zfp362  | ZNF362  | 7.018003354 | 8.893506661 | 16.76273487  | 7.84017804  | 10.92222779 | 15.1345296  | 3.429910554 | 11.81309936 | 5.342668547 | 13.46394669 |
| ENSMUSG000000035142 | 0.001170519  | 1.992726704  | 3.67E-06 | 0.998471818 | 0.999629203 | Nubpl   | Nubpl   | NUBPL   | 7.088183388 | 6.344034752 | 1.346404407  | 2.428373729 | 2.87771271  | 7.858313444 | 8.218842272 | 1.381649048 | 1.099961171 | 1.241820326 |
| ENSMUSG000000061082 | -0.001191817 | 1.024832938  | 3.58E-06 | 0.998489494 | 0.999629203 | Plac1   | Plac1   | PLAC1   | 2.17558104  | 2.193731643 | 1.88496617   | 1.526406344 | 2.092881971 | 5.020589145 | 2.78275762  | 0.898071881 | 0.785686551 | 0.392153787 |
| ENSMUSG000000027944 | 0.00045177   | 6.267018903  | 3.51E-06 | 0.998505008 | 0.999629203 | Hax1    | Hax1    | HAX1    | 98.32222699 | 81.28665088 | 80.17838243  | 61.75007483 | 79.07169697 | 83.23991278 | 114.8696459 | 74.74721349 | 40.61999469 | 63.65963143 |
| ENSMUSG000000056305 | 0.000526738  | 5.096742597  | 3.22E-06 | 0.998568288 | 0.999629203 | Usp39   | Usp39   | USP39   | 41.82729999 | 35.98905696 | 34.60259326  | 27.26716787 | 37.99888829 | 67.01395076 | 47.30687953 | 19.13583931 | 16.81369219 | 23.26779136 |
| ENSMUSG000000090266 | -0.000482637 | 4.143588725  | 2.87E-06 | 0.998648537 | 0.999629203 | Mett23  | Mett23  | METTL23 | 27.51057315 | 17.90559341 | 15.61829112  | 16.72108768 | 13.47292769 | 14.84348095 | 20.70889391 | 13.47107822 | 14.84947581 | 20.0652021  |
| ENSMUSG000000000486 | -0.000597476 | 2.967449713  | 2.72E-06 | 0.998683927 | 0.999629203 | 1-Sep   | 1-Sep   | 1-Sep   | 8.91286426  | 8.834216617 | 8.549667983  | 5.134275885 | 8.698540692 | 7.203453991 | 4.853647011 | 7.184575049 | 6.128355098 | 11.56853672 |
| ENSMUSG000000033581 | -0.000481656 | 6.21780155   | 1.84E-06 | 0.998918635 | 0.999747547 | Igf2bp2 | Igf2bp2 | IGF2BP2 | 40.84477952 | 95.33839141 | 72.77315819  | 81.73212151 | 94.37589638 | 49.9148428  | 33.45780673 | 149.2180972 | 53.50525412 | 65.62040036 |
| ENSMUSG000000005686 | -0.000504563 | 5.235190498  | 1.77E-06 | 0.998937214 | 0.999747547 | Ampd3   | Ampd3   | AMPD3   | 24.00157147 | 59.58649463 | 26.7934477   | 33.65032168 | 51.40641341 | 19.8640701  | 18.12028217 | 76.68152216 | 27.97044121 | 33.79058465 |
| ENSMUSG000000090582 | -0.001060708 | -0.892749496 | 8.27E-07 | 0.999274597 | 0.999949926 | Gm17024 | Gm17024 |         | 0.421080201 | 1.007930755 | 0.471241542  | 0           | 0.196207685 | 0.218286485 | 0.258861174 | 1.4507315   | 0           | 0           |
| ENSMUSG000000022300 | 0.0002055    | 6.735884337  | 7.26E-07 | 0.999320003 | 0.999949926 | Dcaf13  | Dcaf13  | DCAF13  | 121.9728983 | 91.1880883  | 120.368554   | 125.5816129 | 91.56358623 | 131.4812259 | 143.0855139 | 72.05299785 | 77.07585065 | 97.25413918 |
| ENSMUSG000000030231 | -0.000225549 | 3.804109296  | 4.70E-07 | 0.999452748 | 0.999949926 | Plekha5 | Plekha5 | PLEKHA5 | 13.96582667 | 15.05967128 | 15.5509709   | 12.00310443 | 15.36960198 | 10.25946477 | 6.471529348 | 17.61602536 | 13.43524002 | 17.45084352 |
| ENSMUSG000000039205 | -0.000161401 | 5.094538504  | 3.73E-07 | 0.999512599 | 0.999949926 | Ciz1    | Ciz1    | CIZ1    | 28.98435385 | 35.27757642 | 38.77644692  | 30.31998056 | 43.62350858 | 33.10678349 | 17.14955277 | 38.8934207  | 29.54181432 | 44.18266001 |
| ENSMUSG000000021996 | 0.000164559  | 9.448301527  | 3.52E-07 | 0.999526332 | 0.999949926 | Esd     | Esd     | ESD     | 825.1768344 | 658.8902635 | 713.3250547  | 695.5556182 | 734.8631821 | 502.1316767 | 975.8419104 | 737.5933442 | 487.5970735 | 643.1322107 |
| ENSMUSG000000041258 | 0.000140962  | 4.472636981  | 2.89E-07 | 0.999570924 | 0.999949926 | Zfp236  | Zfp236  | ZNF236  | 25.12445201 | 20.75151554 | 23.62939734  | 20.53710354 | 24.65676572 | 28.81381596 | 13.8490728  | 24.86968286 | 22.54920401 | 16.14366423 |
| ENSMUSG000000024220 | -0.000144398 | 3.747759957  | 2.33E-07 | 0.999614942 | 0.999949926 | Zfp523  | Zfp523  | ZNF76   | 14.59744698 | 11.73942879 | 15.82025178  | 10.40731598 | 16.74305577 | 16.95358363 | 7.312828163 | 14.78364481 | 10.99961171 | 14.50969012 |
| ENSMUSG000000031729 | -8.88E-05    | 6.861381605  | 1.54E-07 | 0.999687009 | 0.999949926 | Ist1    | Ist1    | IST1    | 111.6564334 | 106.3663397 | 138.5450135  | 129.5363929 | 115.173911  | 121.1489989 | 93.77246025 | 117.3020042 | 105.9105471 | 118.6265206 |
| ENSMUSG000000089901 | 6.24E-05     | 4.064154062  | 4.14E-08 | 0.999837623 | 0.999949926 | Gm8113  | Gm8113  |         | 14.66762701 | 15.77115181 | 13.26208341  | 26.29581838 | 15.36960198 | 27.64962138 | 18.8321504  | 9.740625788 | 13.19953406 | 12.81035704 |
| ENSMUSG000000001065 | 3.79E-05     | 4.628638929  | 1.90E-08 | 0.999890041 | 0.999949926 | Zfp276  | Zfp276  | ZNF276  | 28.14219345 | 22.94524719 | 22.88887492  | 25.67137942 | 28.12310149 | 26.19437815 | 12.68419752 | 24.31702324 | 18.69933991 | 37.05853287 |
| ENSMUSG000000037822 | 1.90E-05     | 6.62356397   | 4.92E-09 | 0.999944022 | 0.999949926 | Smim14  | Smim14  |         | 83.51423991 | 89.70583719 | 101.3842518  | 130.9934172 | 102.6166191 | 71.30691829 | 63.03269585 | 110.5319238 | 90.43252202 | 130.1950573 |
| ENSMUSG000000063919 | -2.03E-05    | 1.550934306  | 3.94E-09 | 0.999949926 | 0.999949926 | Srrm4   | Srrm4   | SRRM4   | 0.631620302 | 4.03172302  | 4.645095204  | 2.01208109  | 3.204725518 | 1.819054038 | 0.841298815 | 4.006782239 | 2.907040239 | 3.529384083 |
